# Supplementary material for: Genome-wide characterization of circulating metabolic biomarkers
Source: PubMed Central journal article supplement (PMC10990933; doi:10.1038/s41586-024-07148-y), 2024-03-06

# Ace

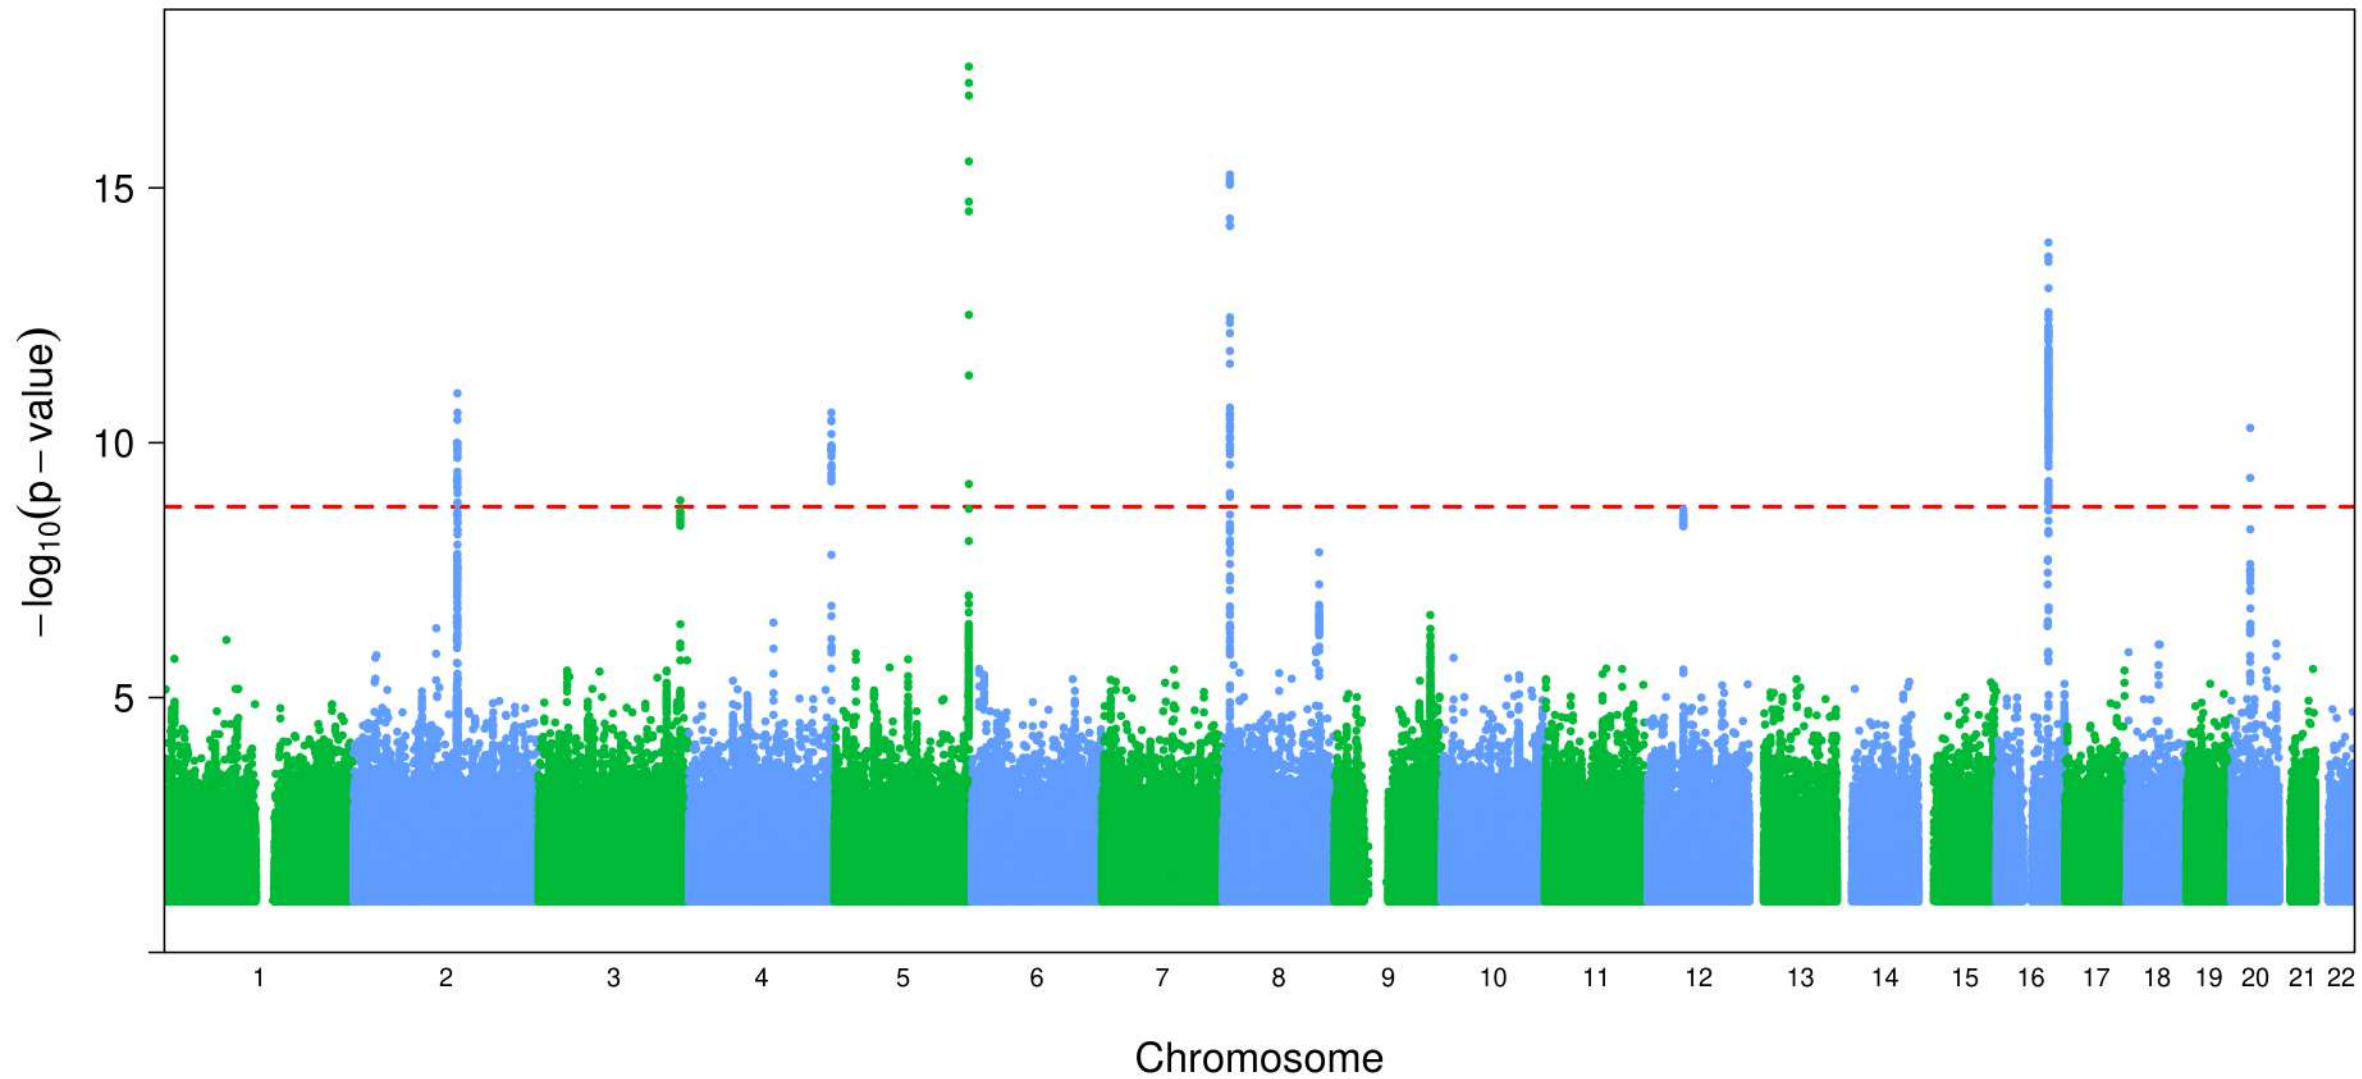

# Acetone

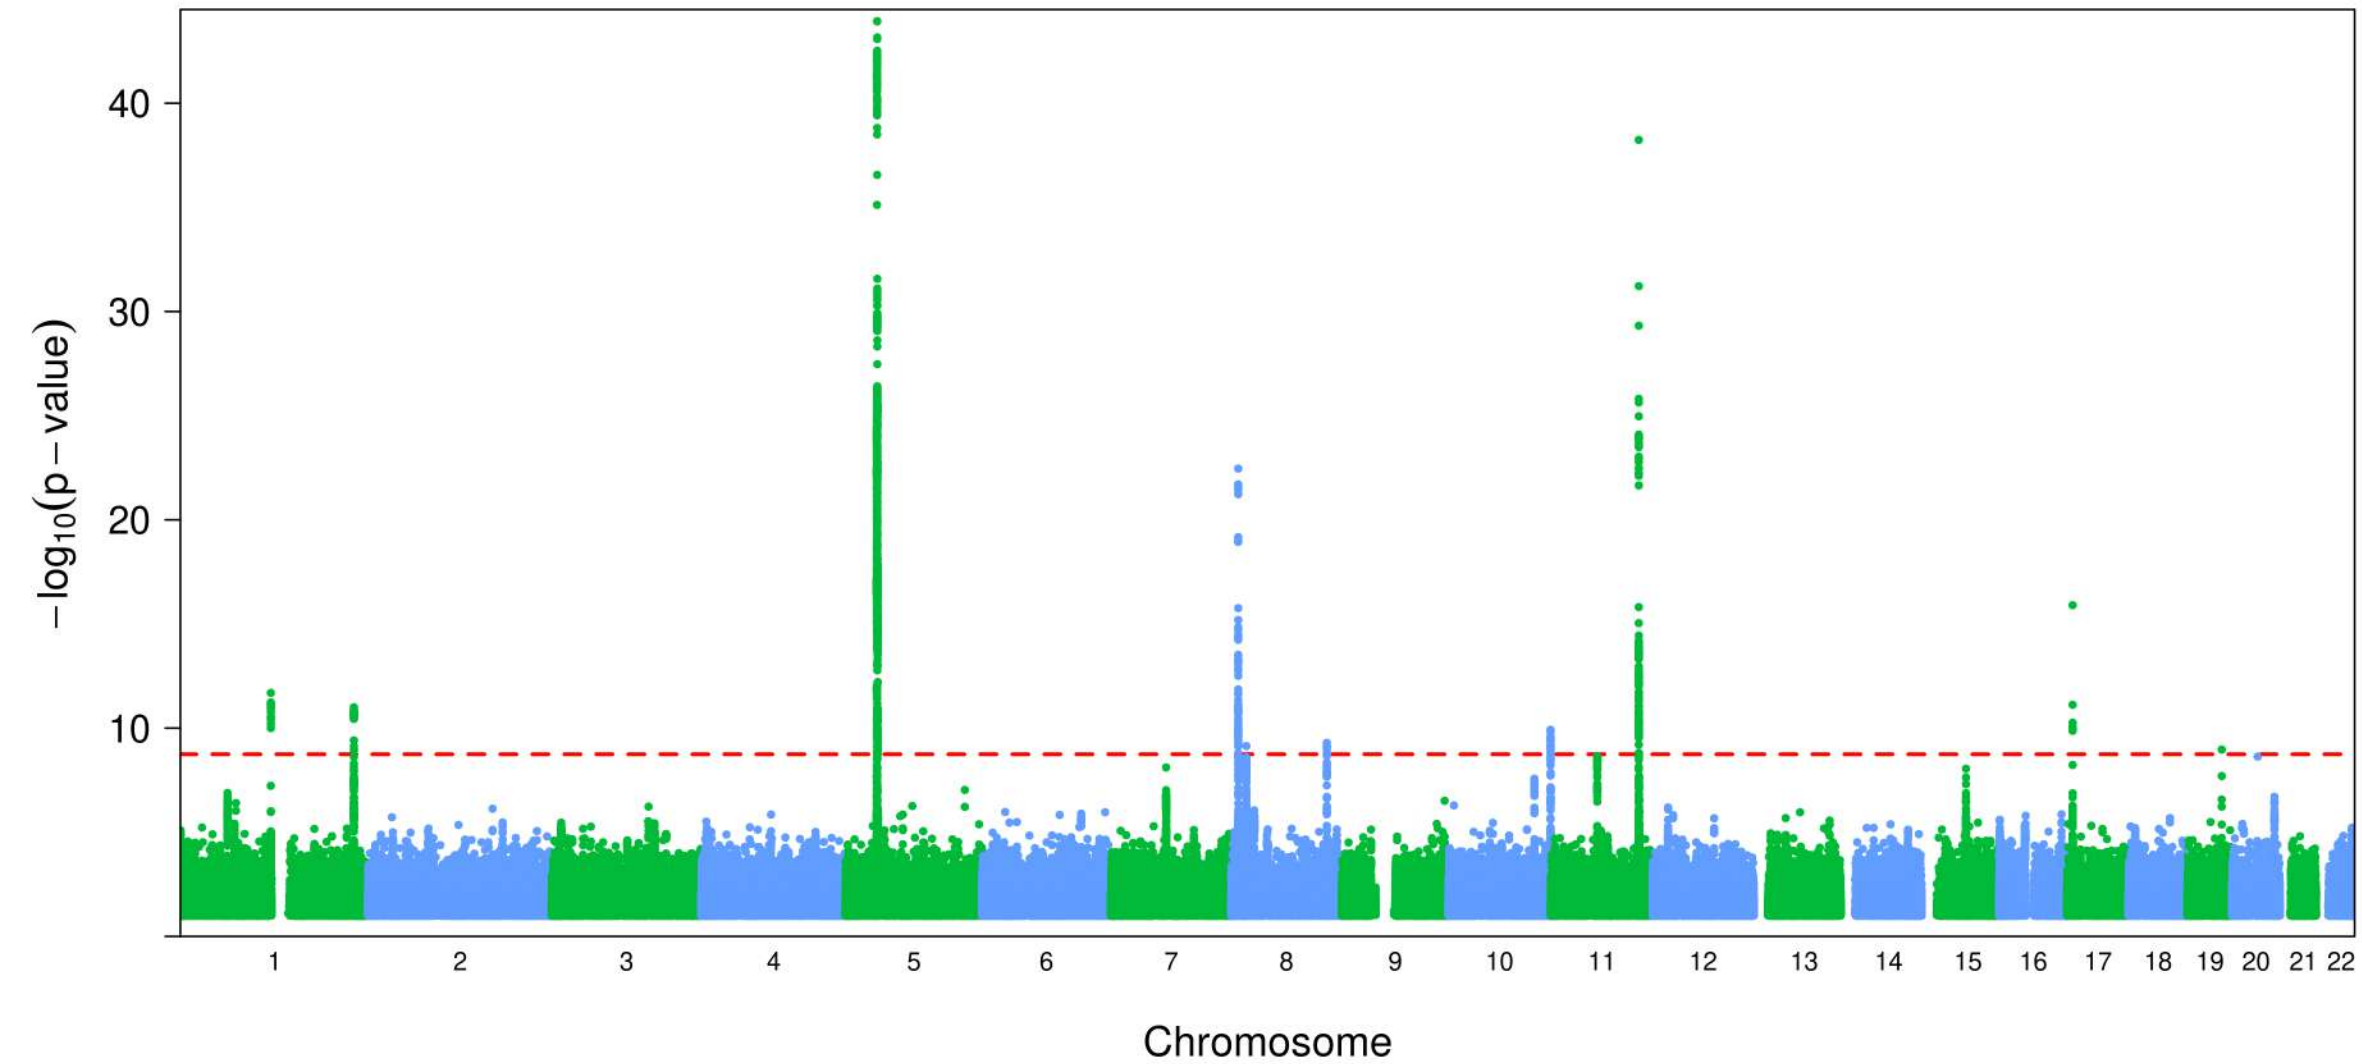

# Ala

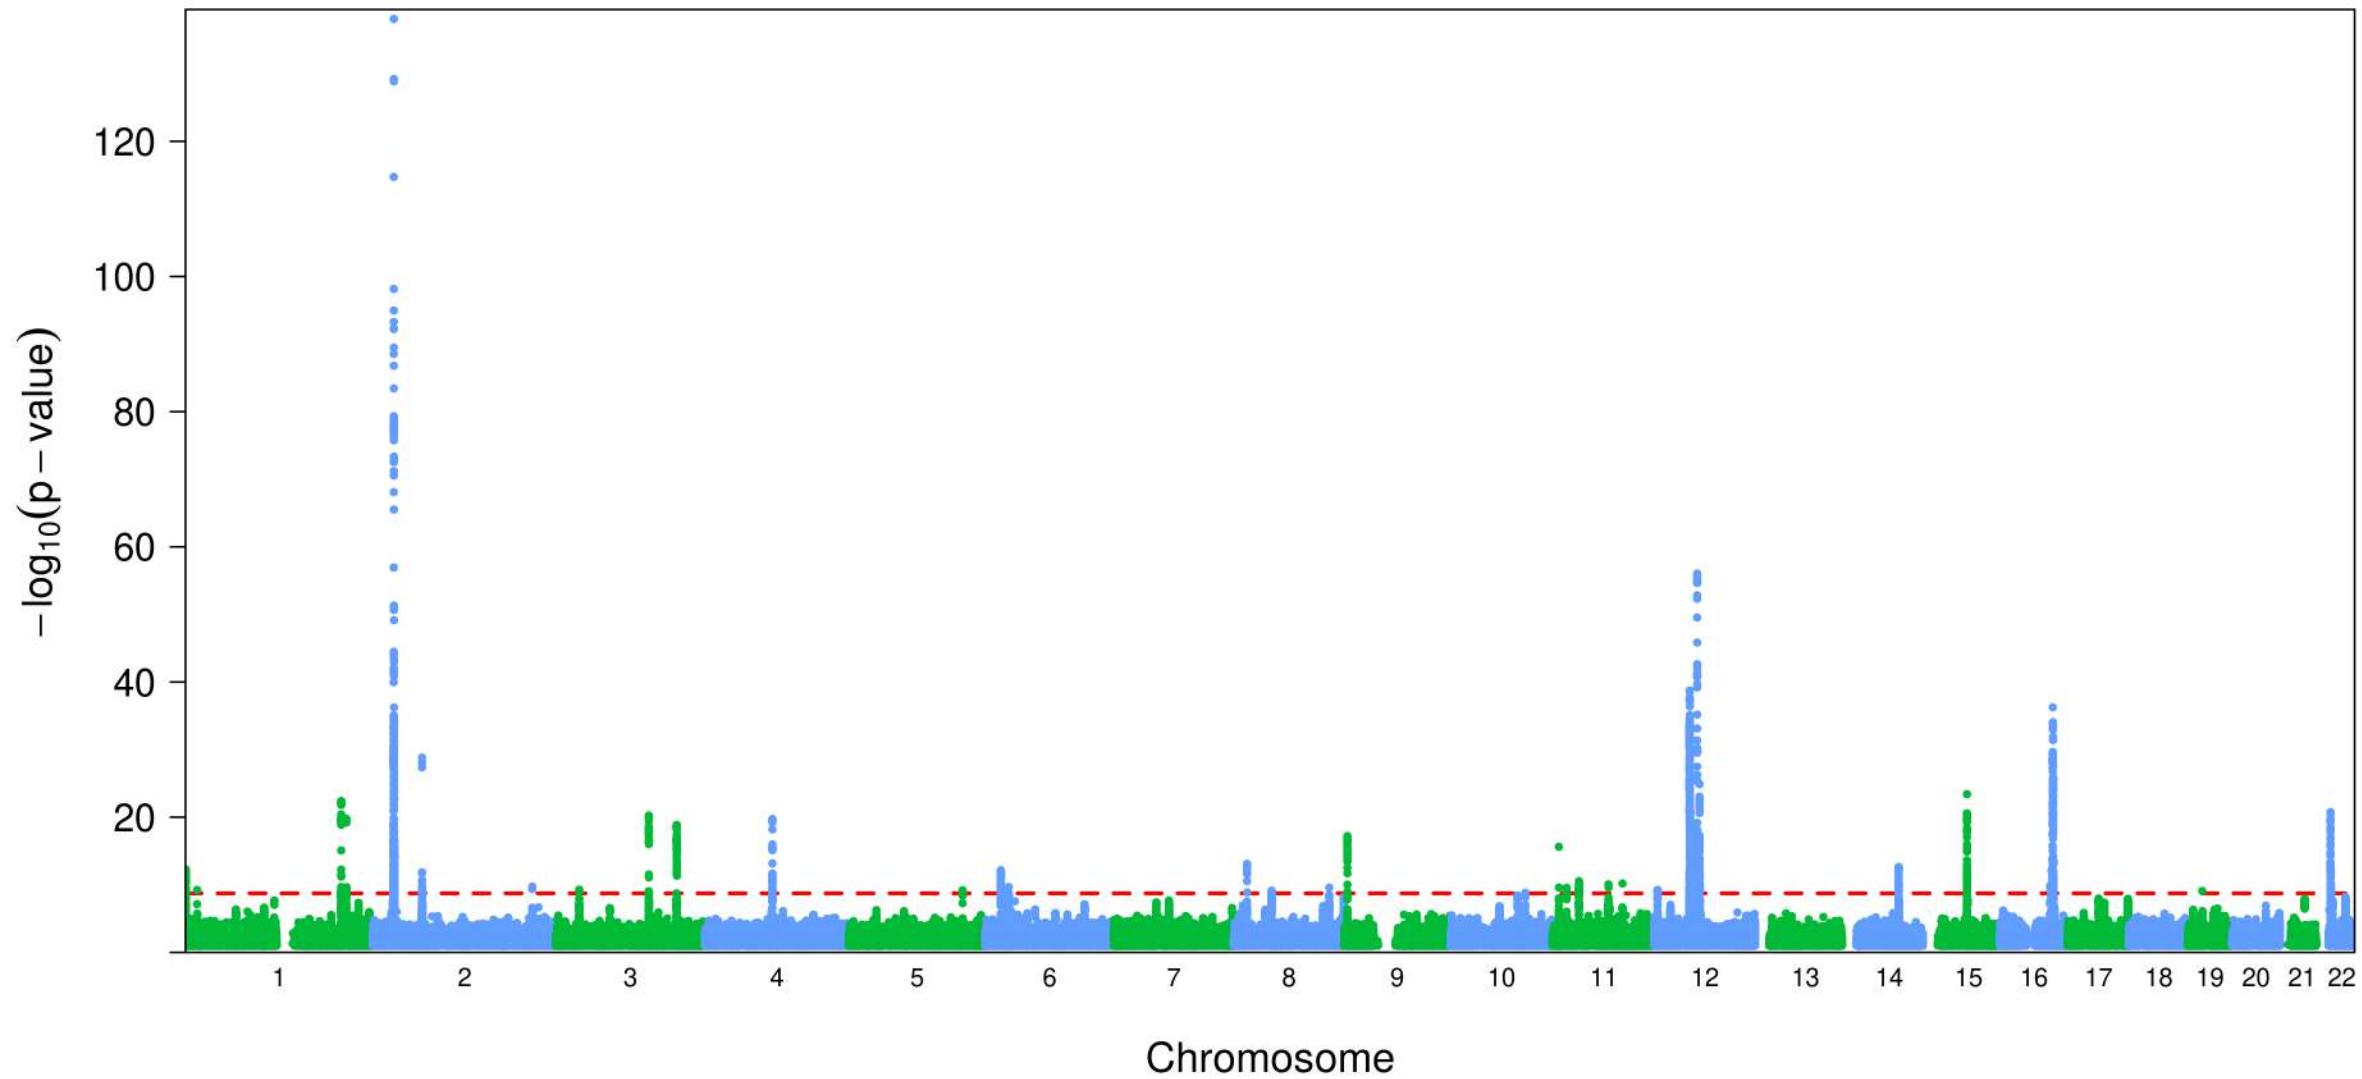

# Alb

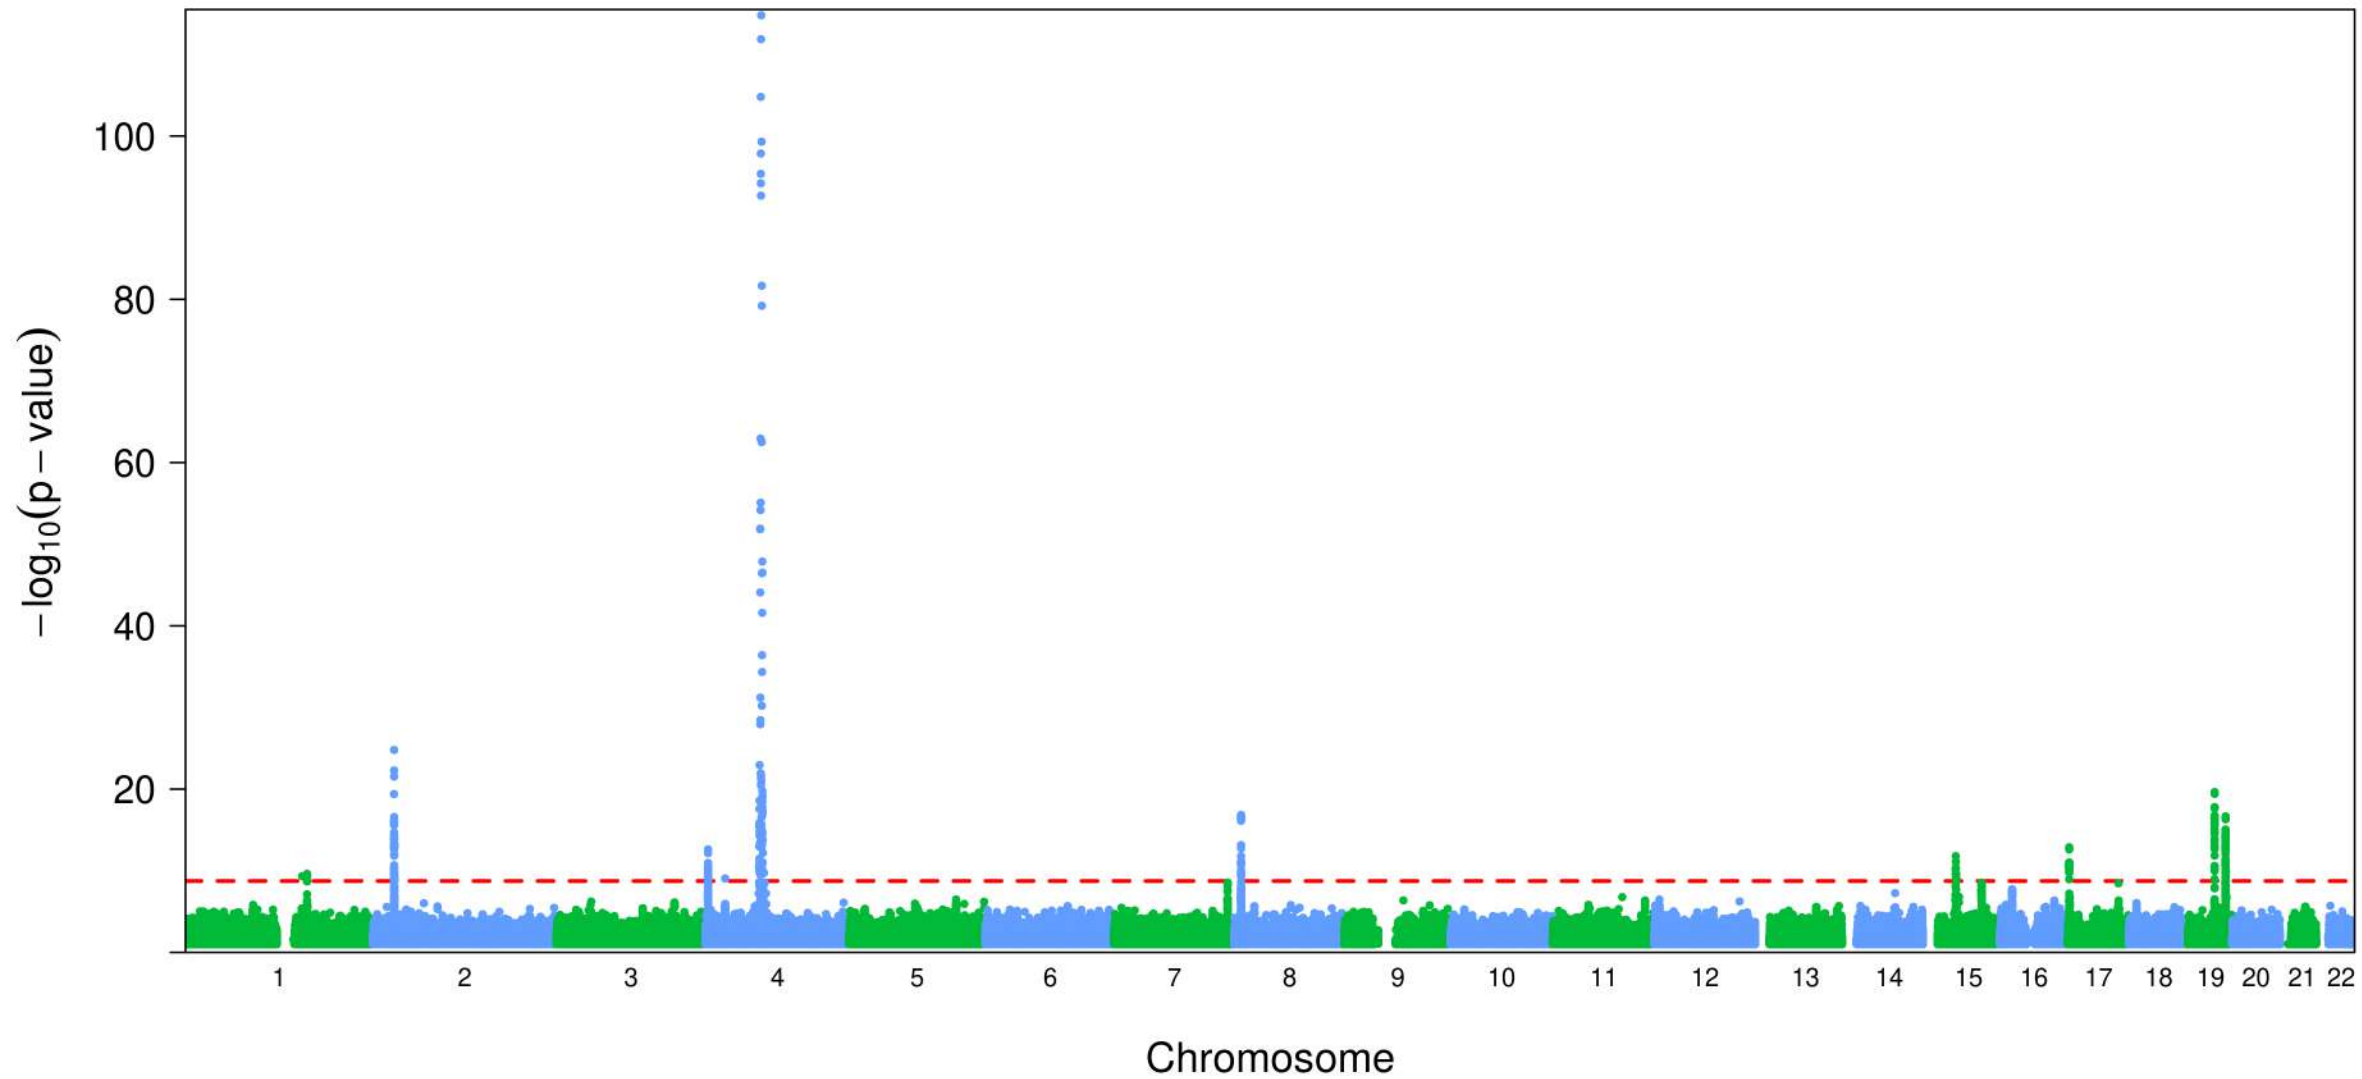

# ApoA1

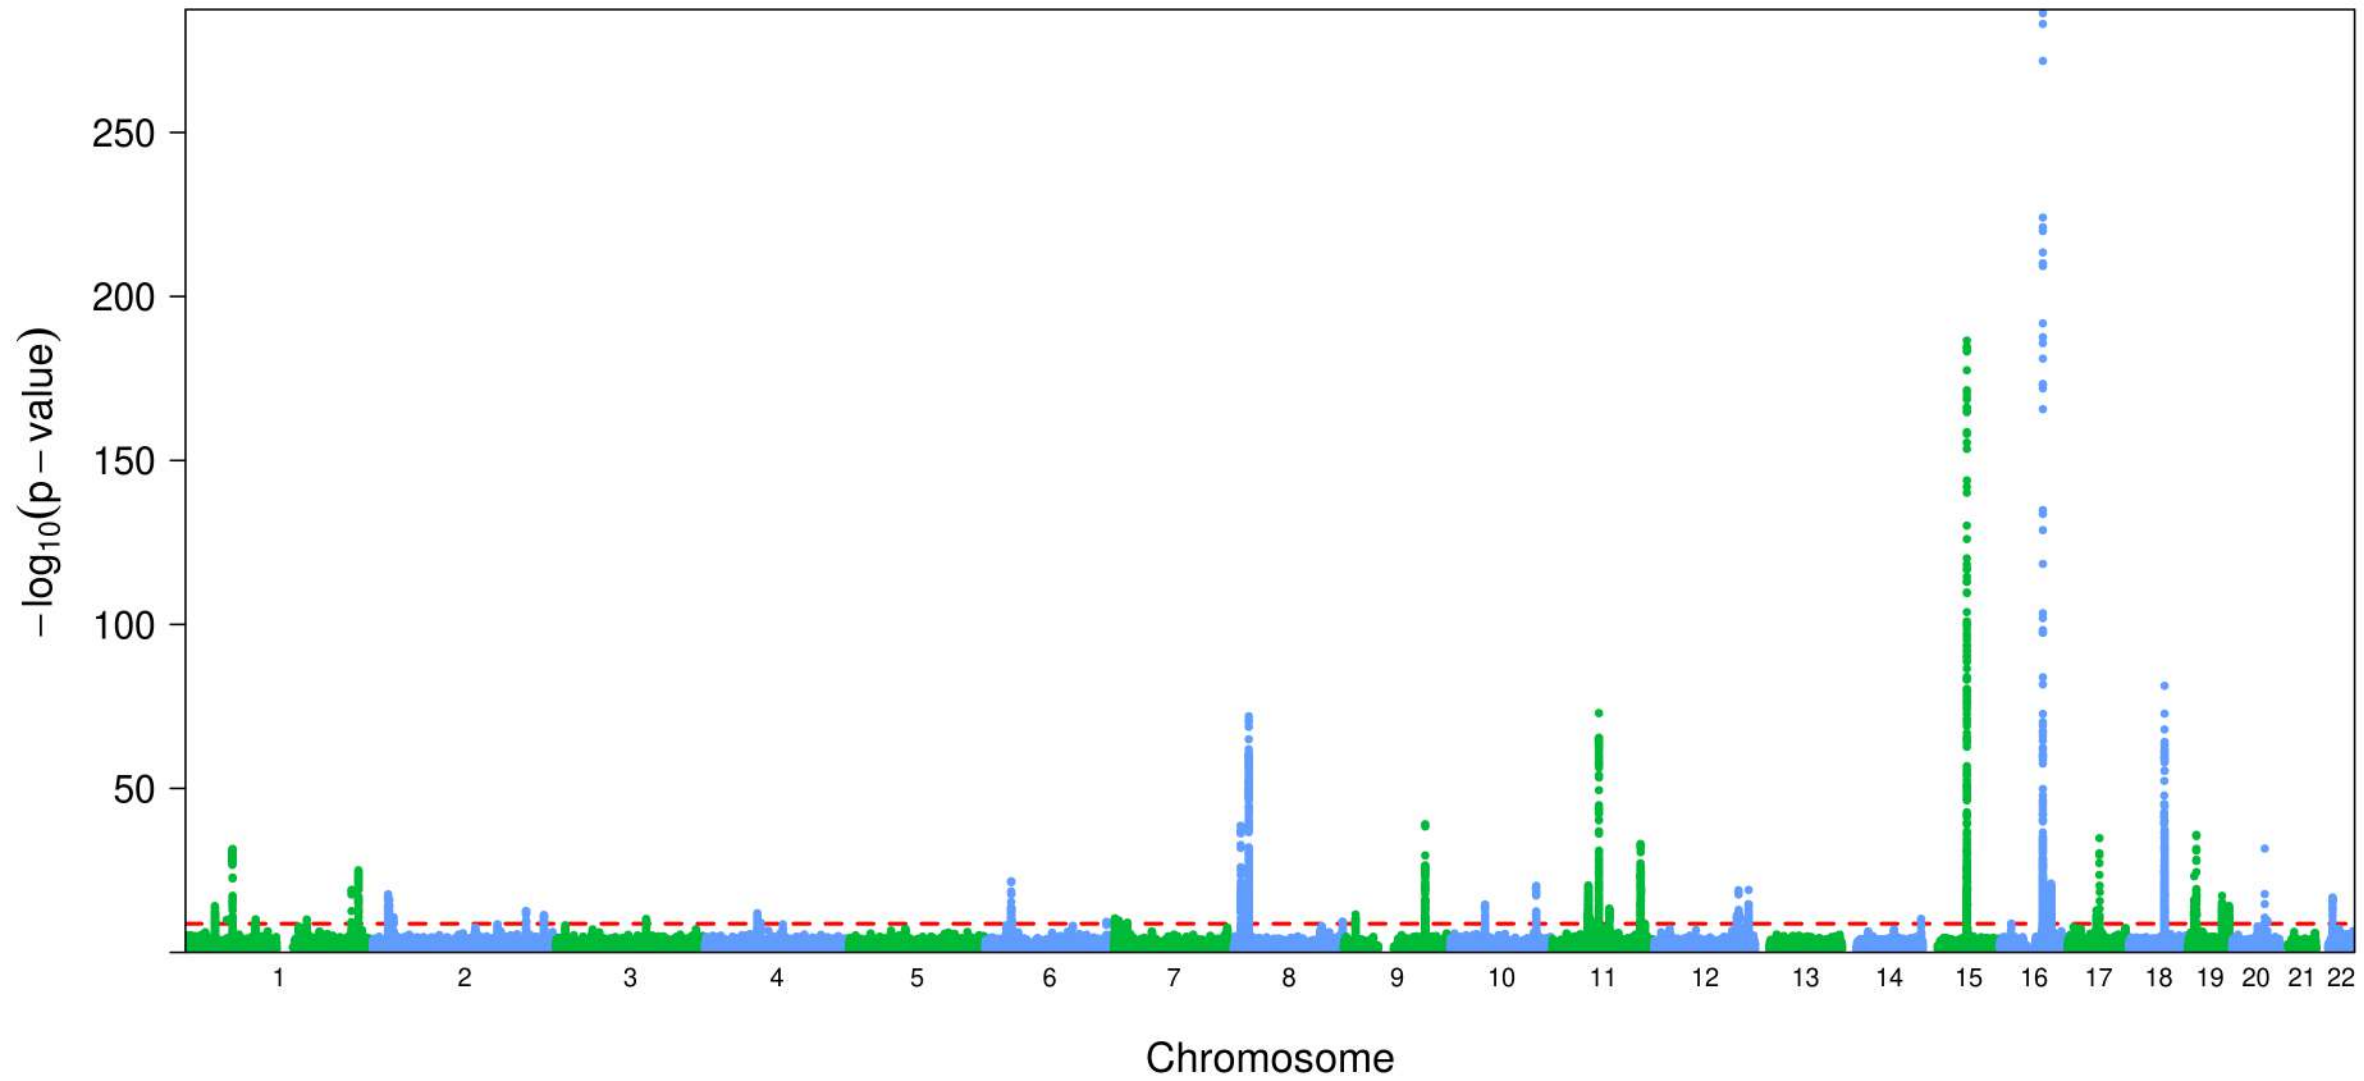

# ApoB

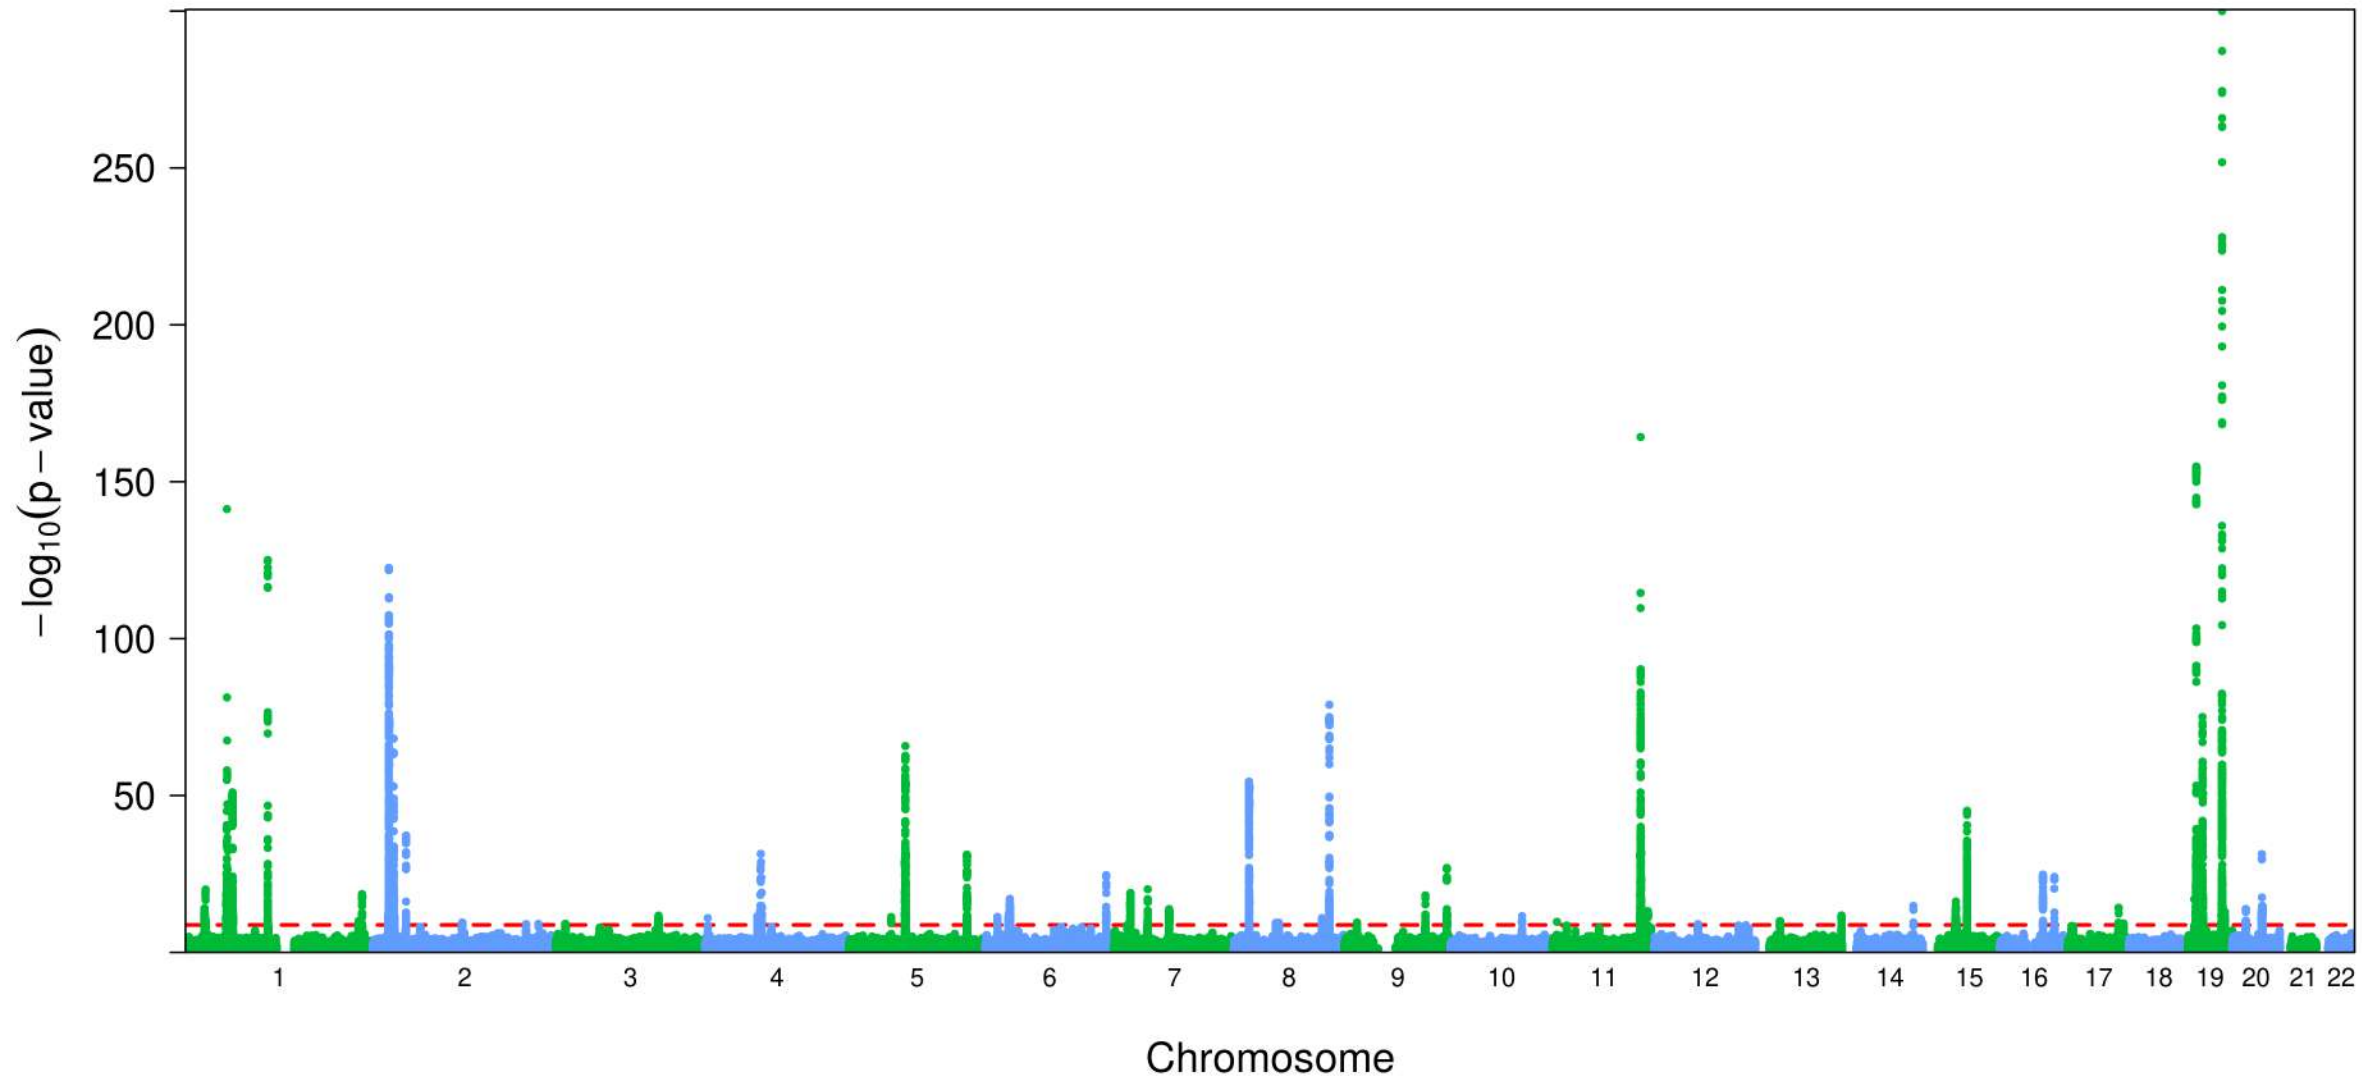

# ApoBbyApoA1

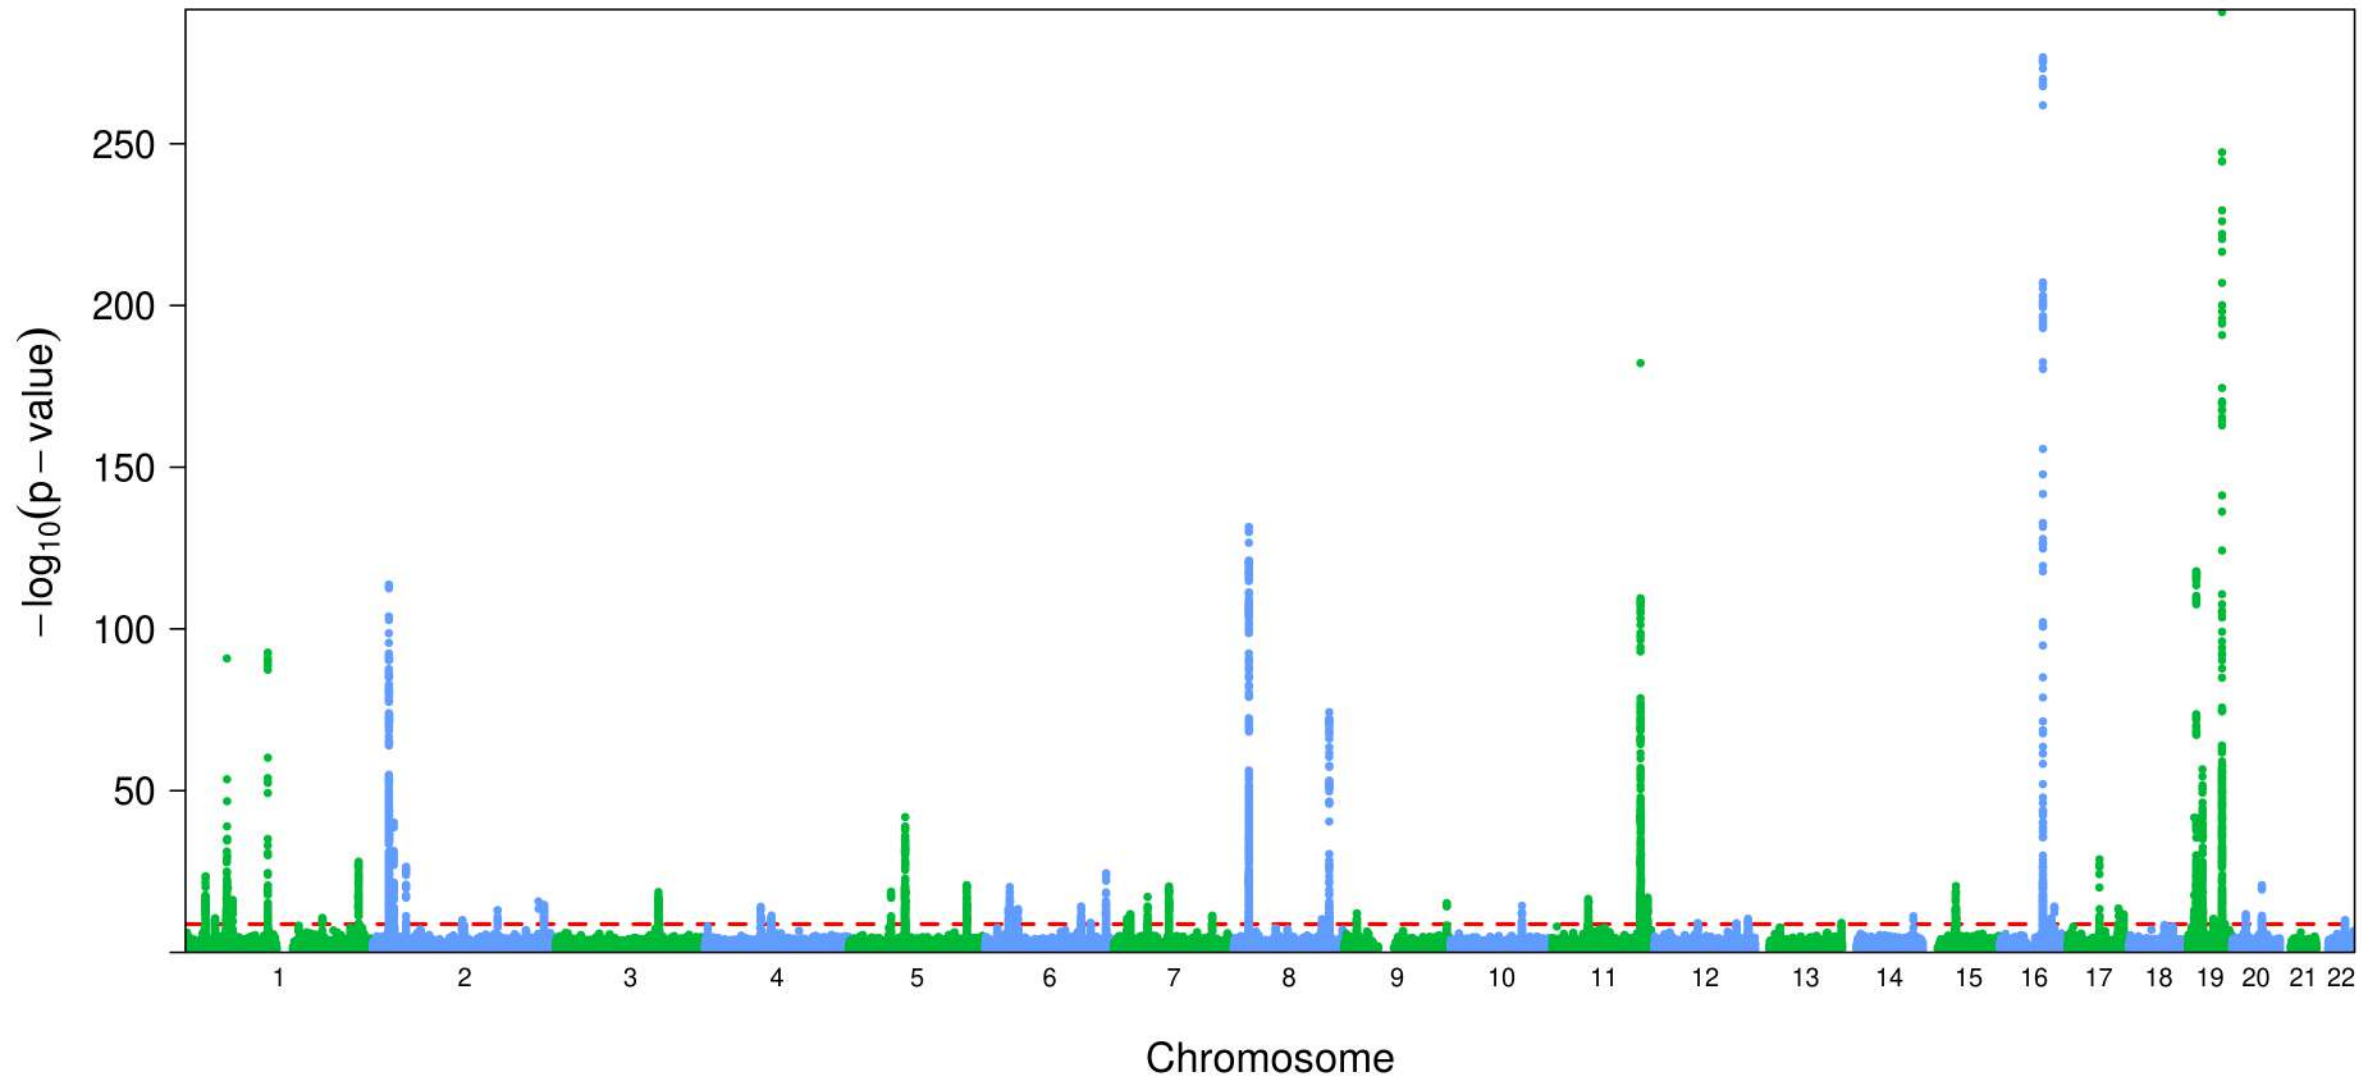

# bOHBut

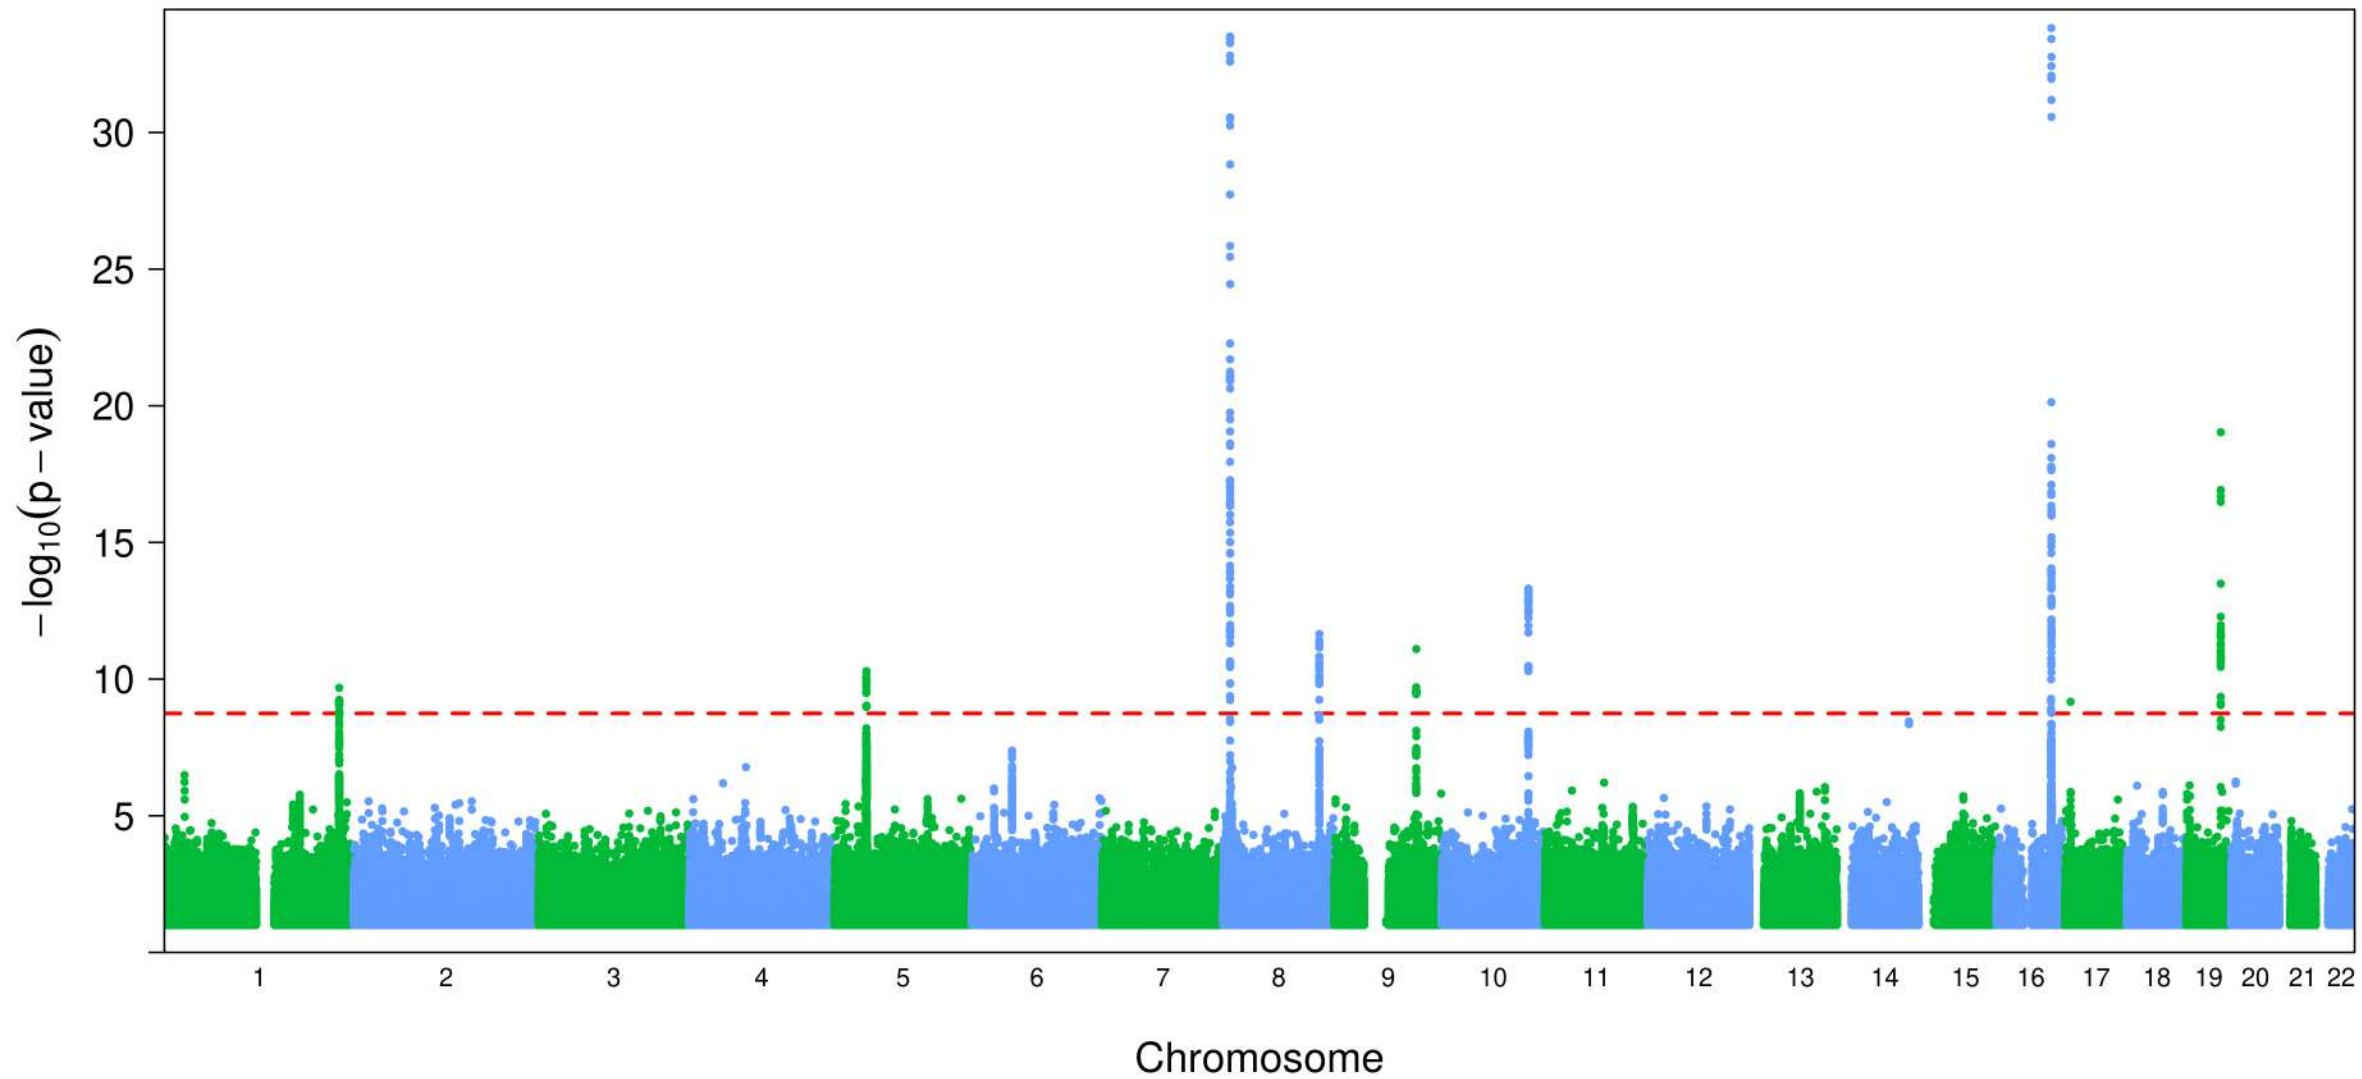



# Cit

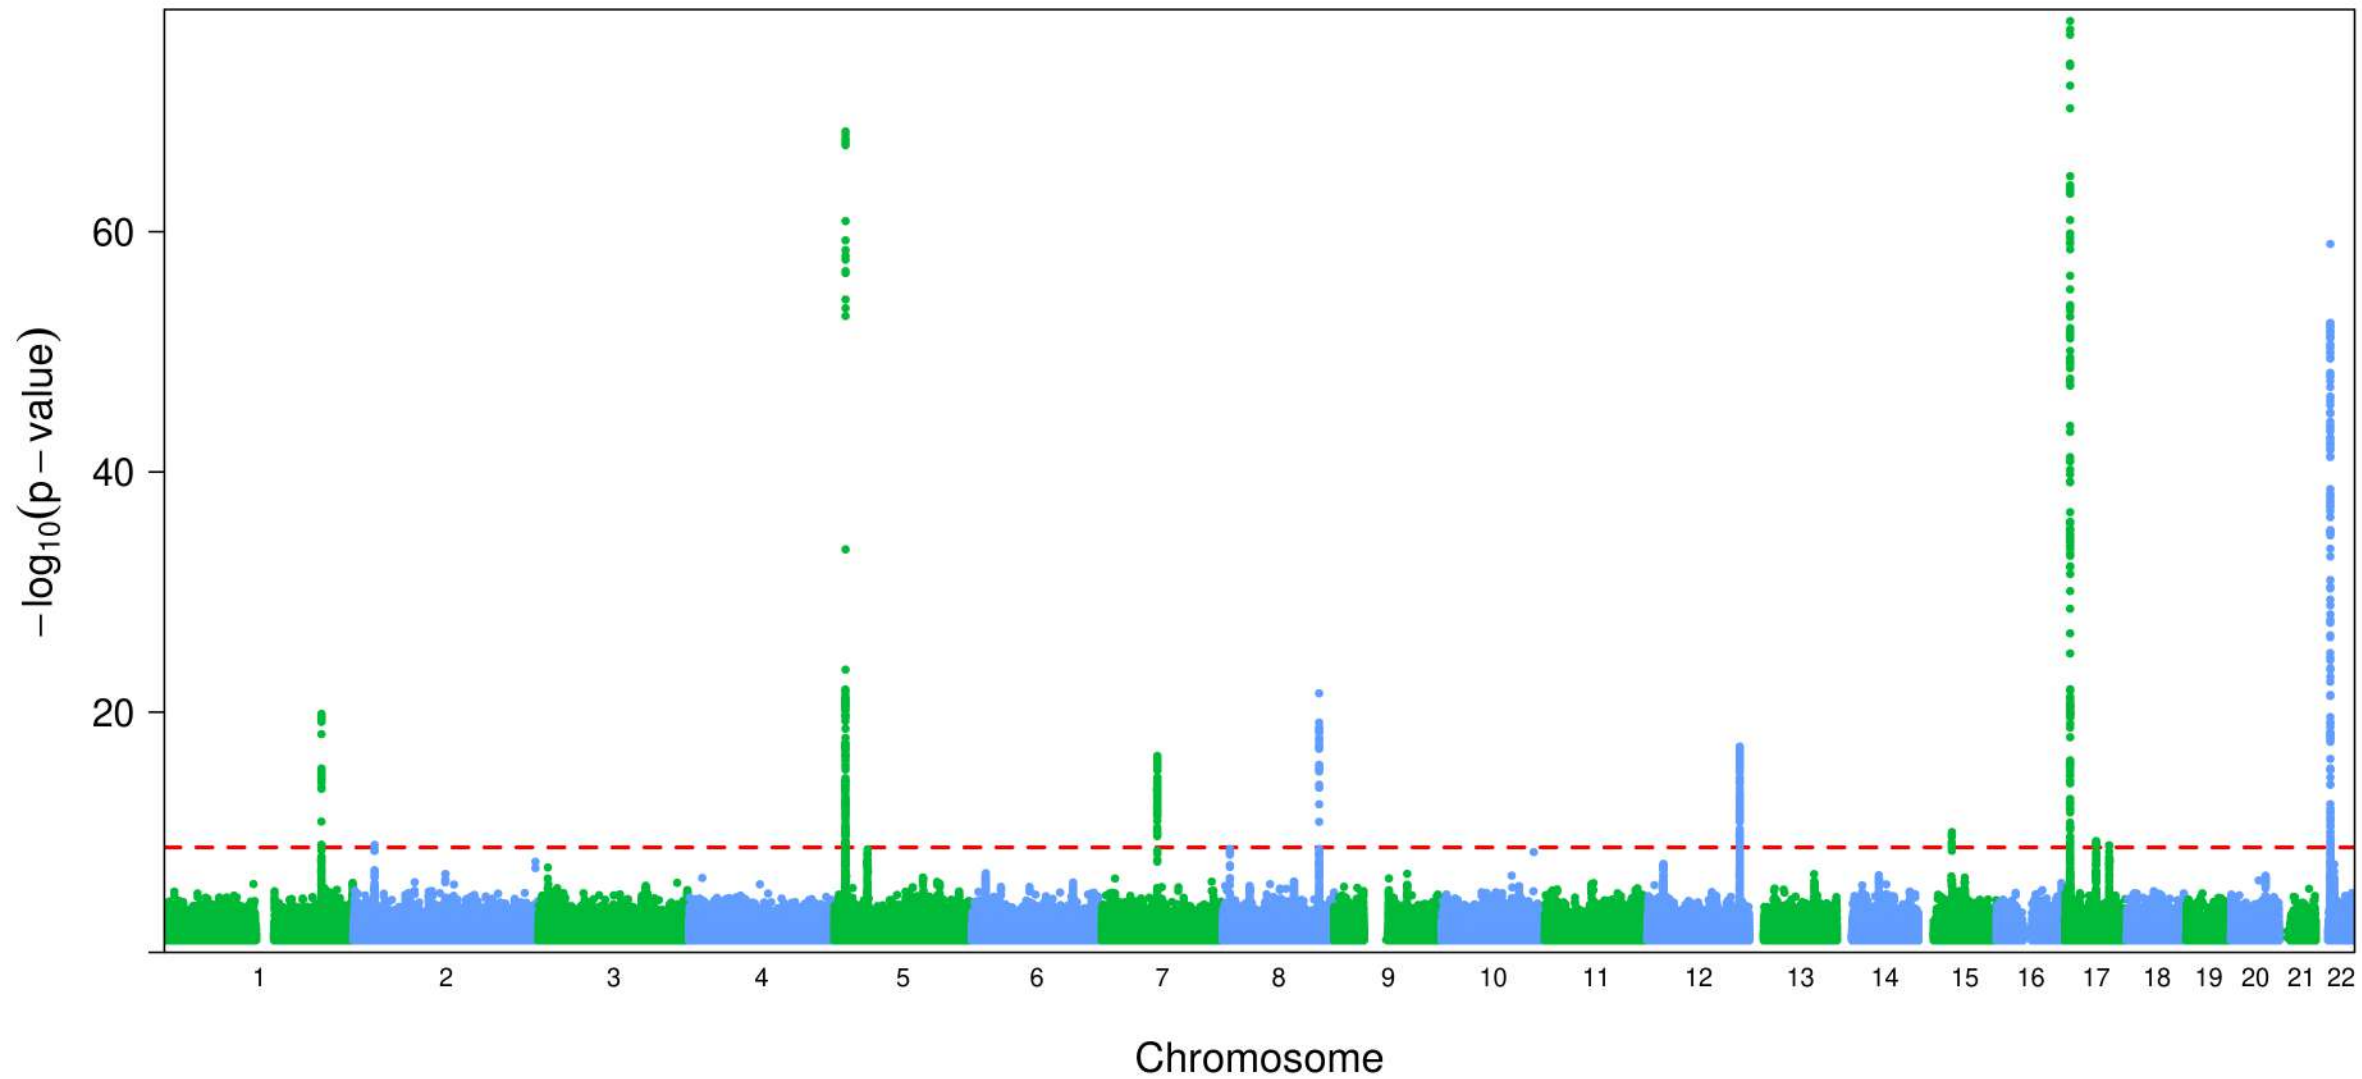

# CLA

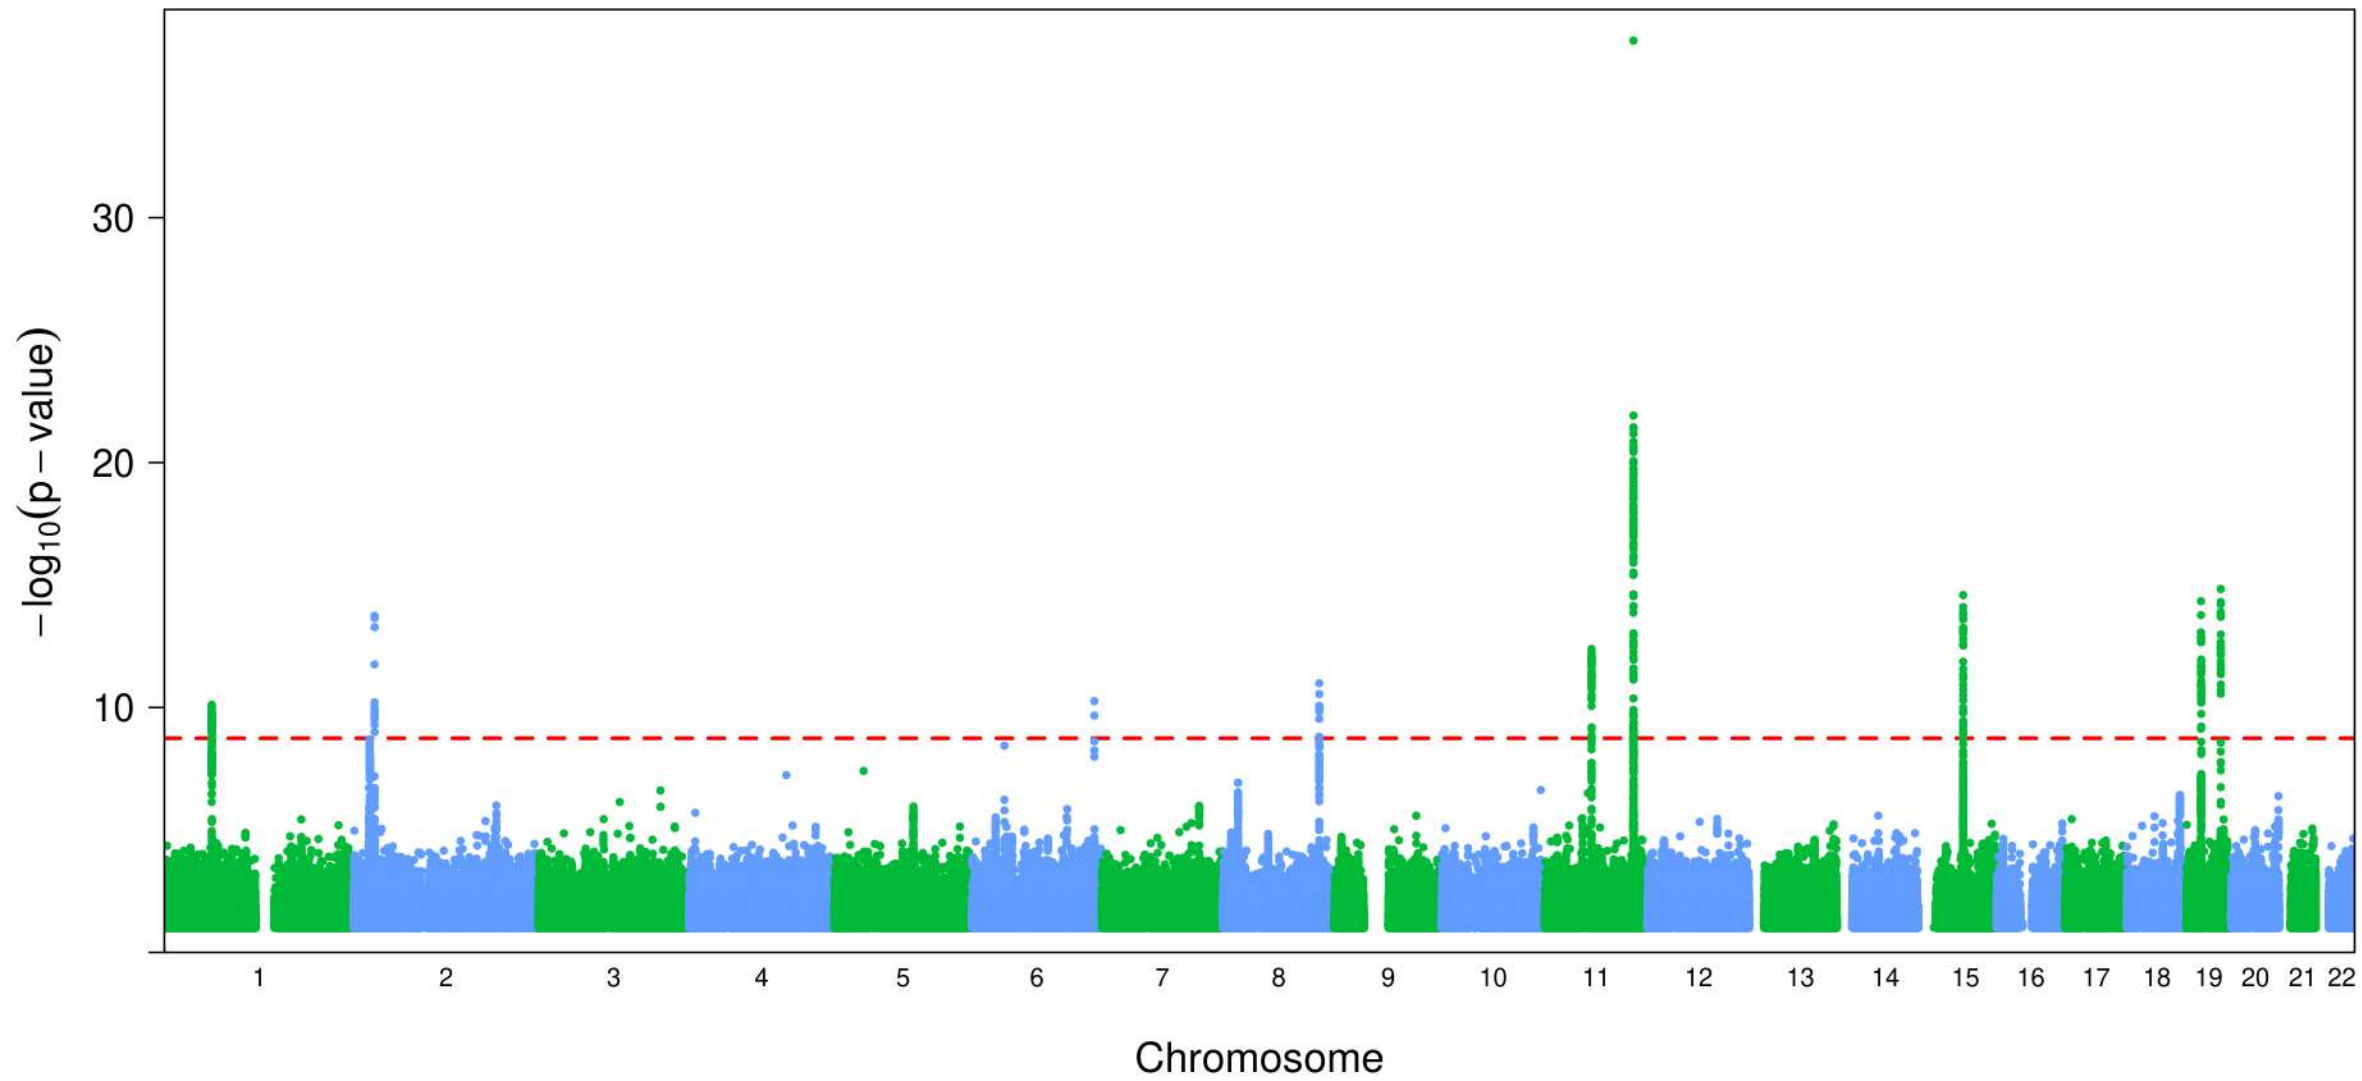

# CLAbbyFA

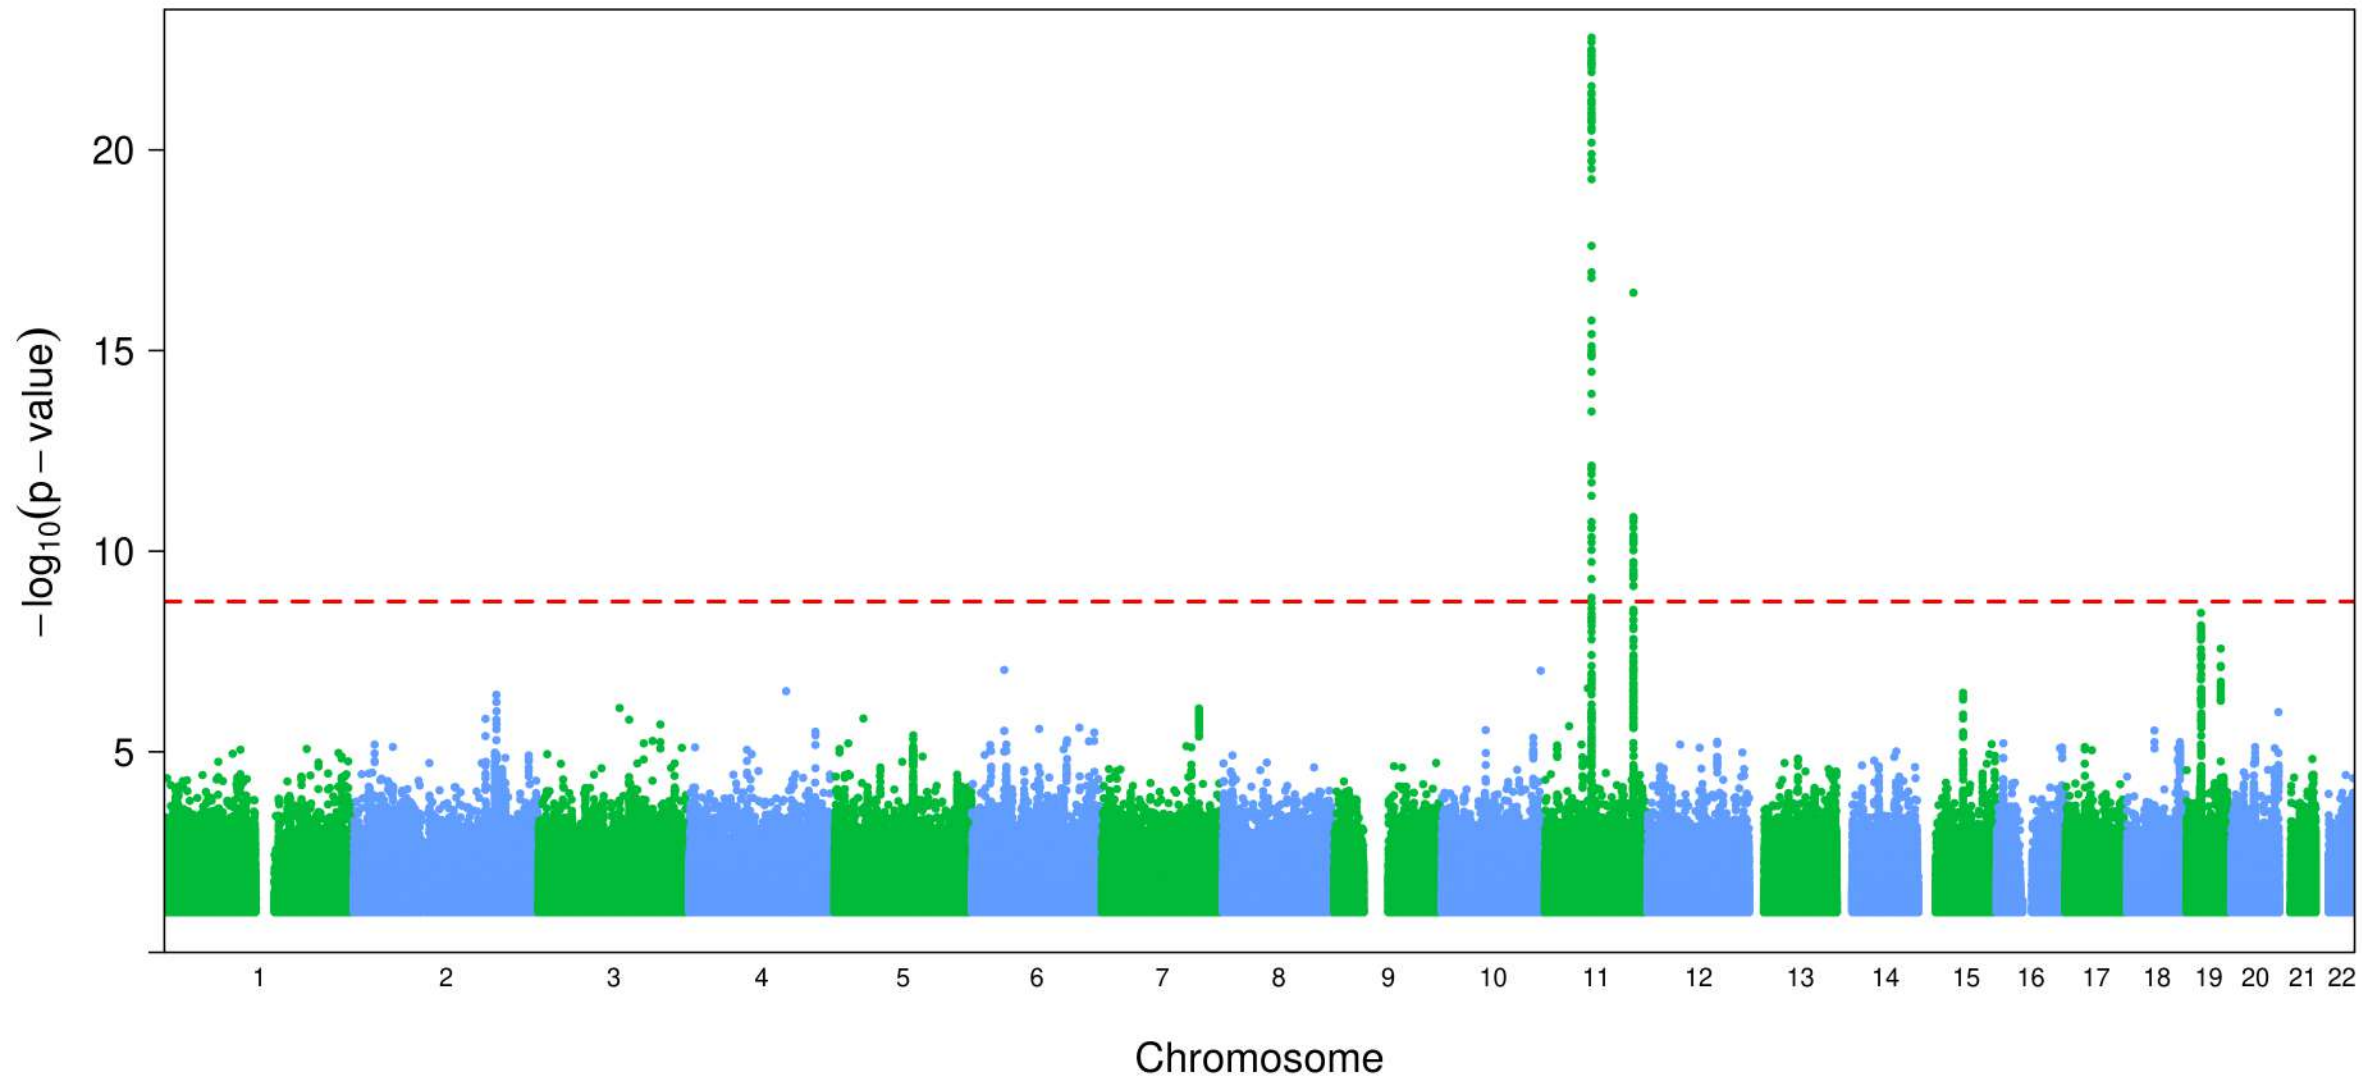

# Crea

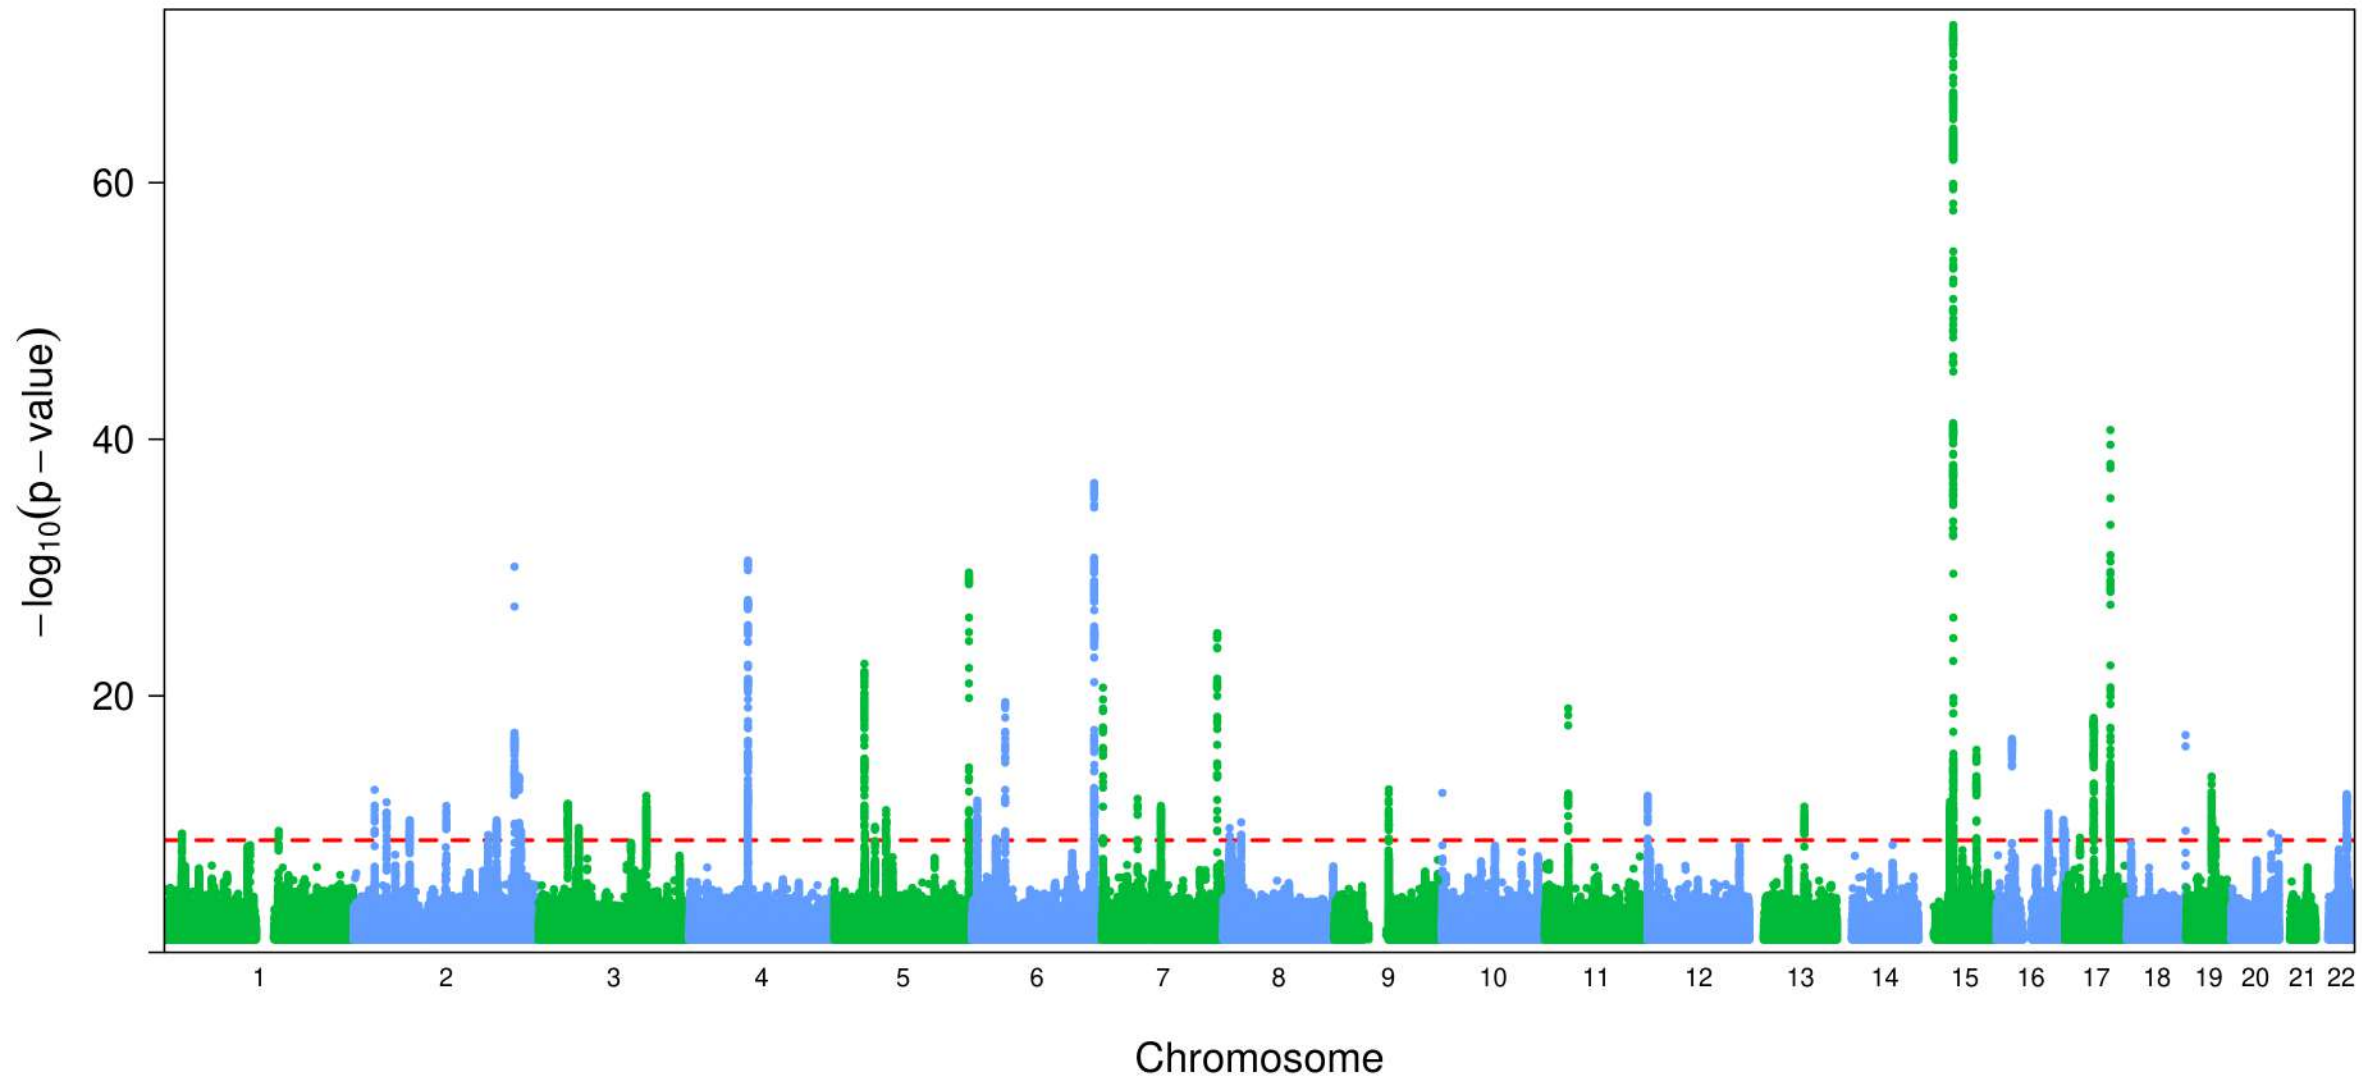

# DAG

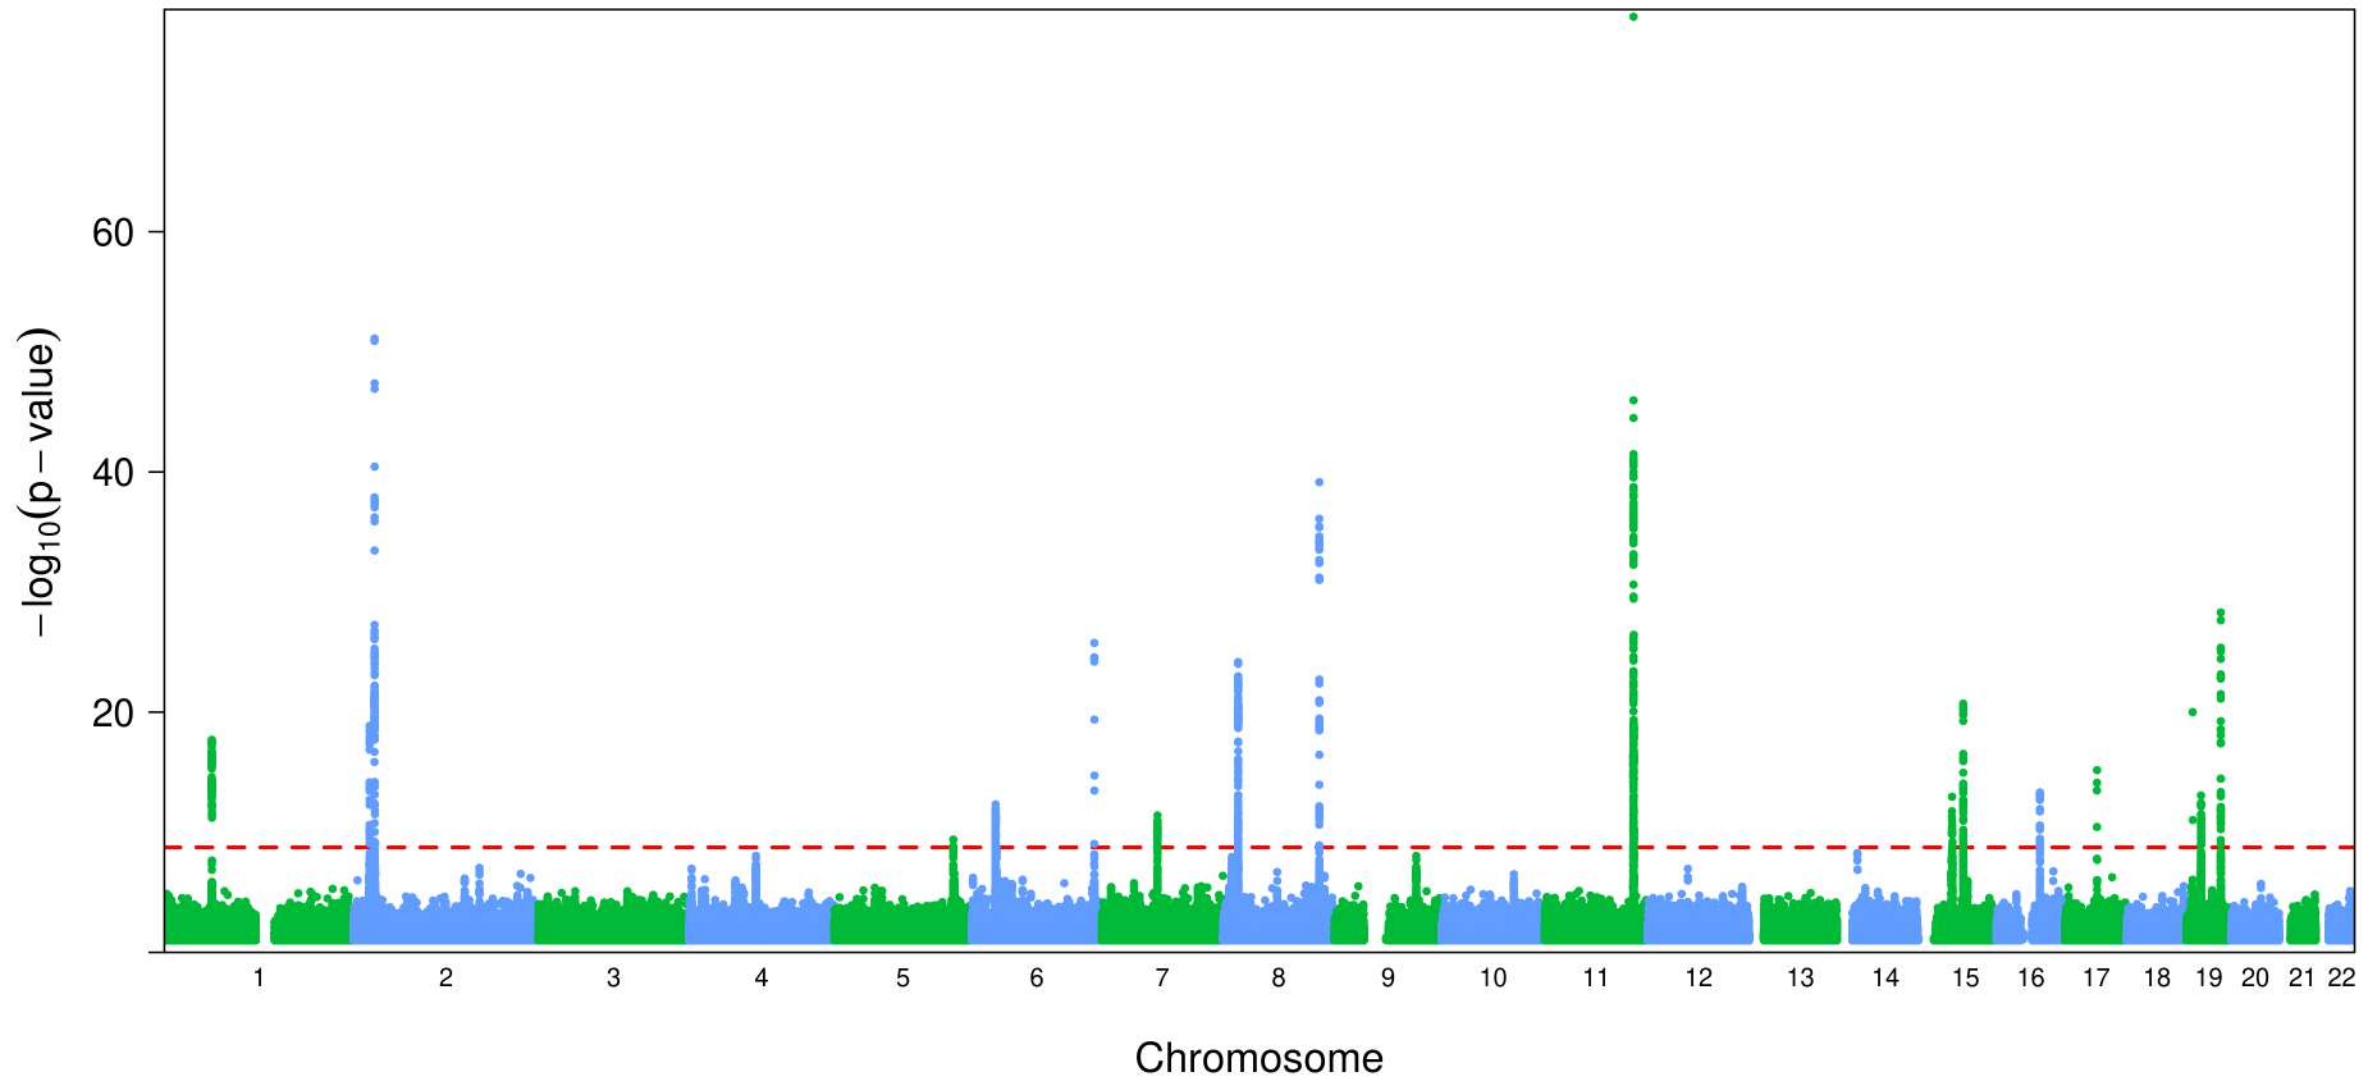

# DAGbyTG

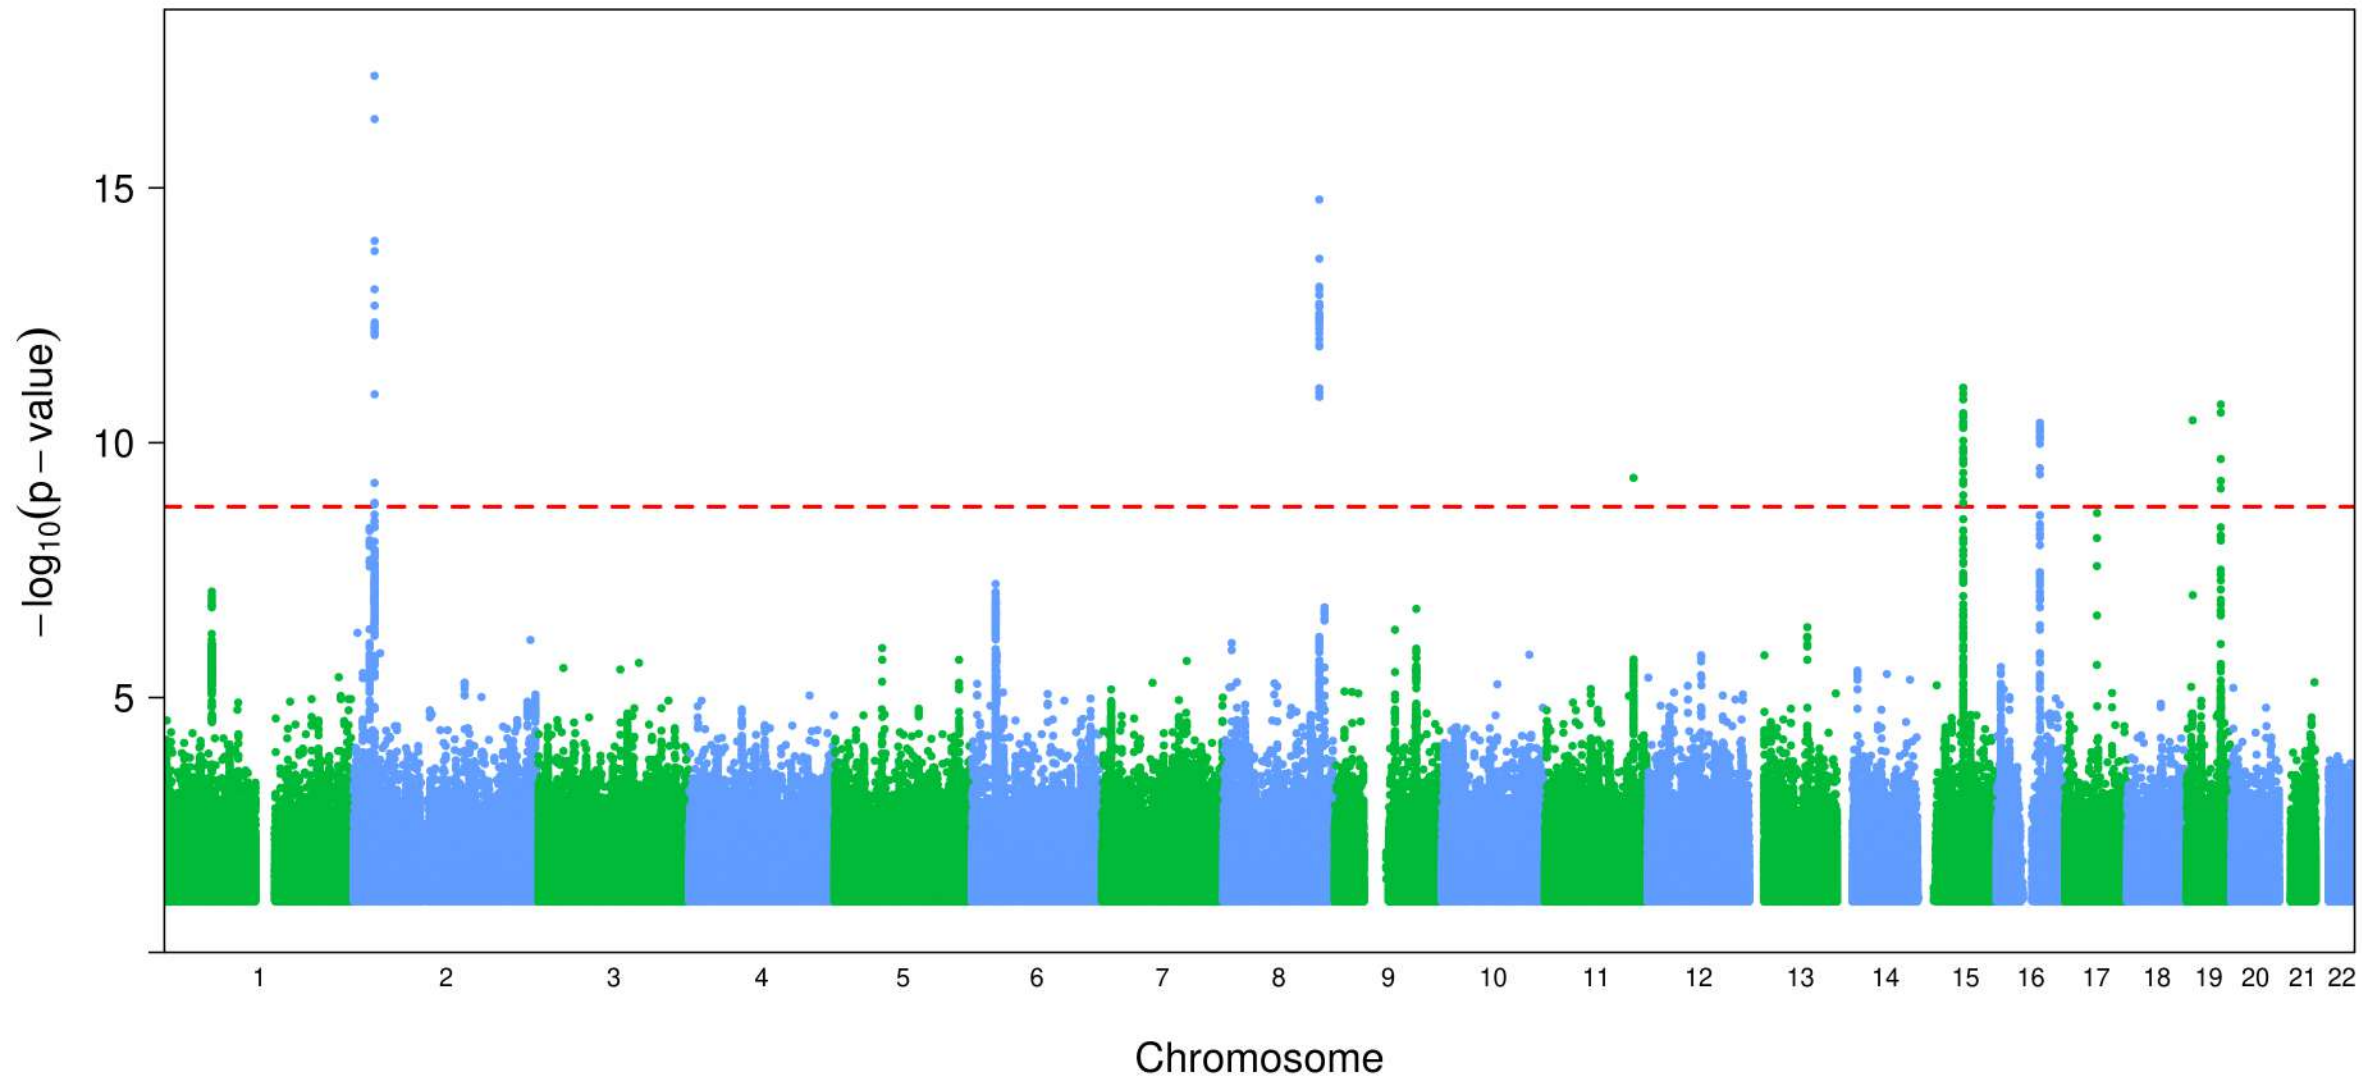

# DHA

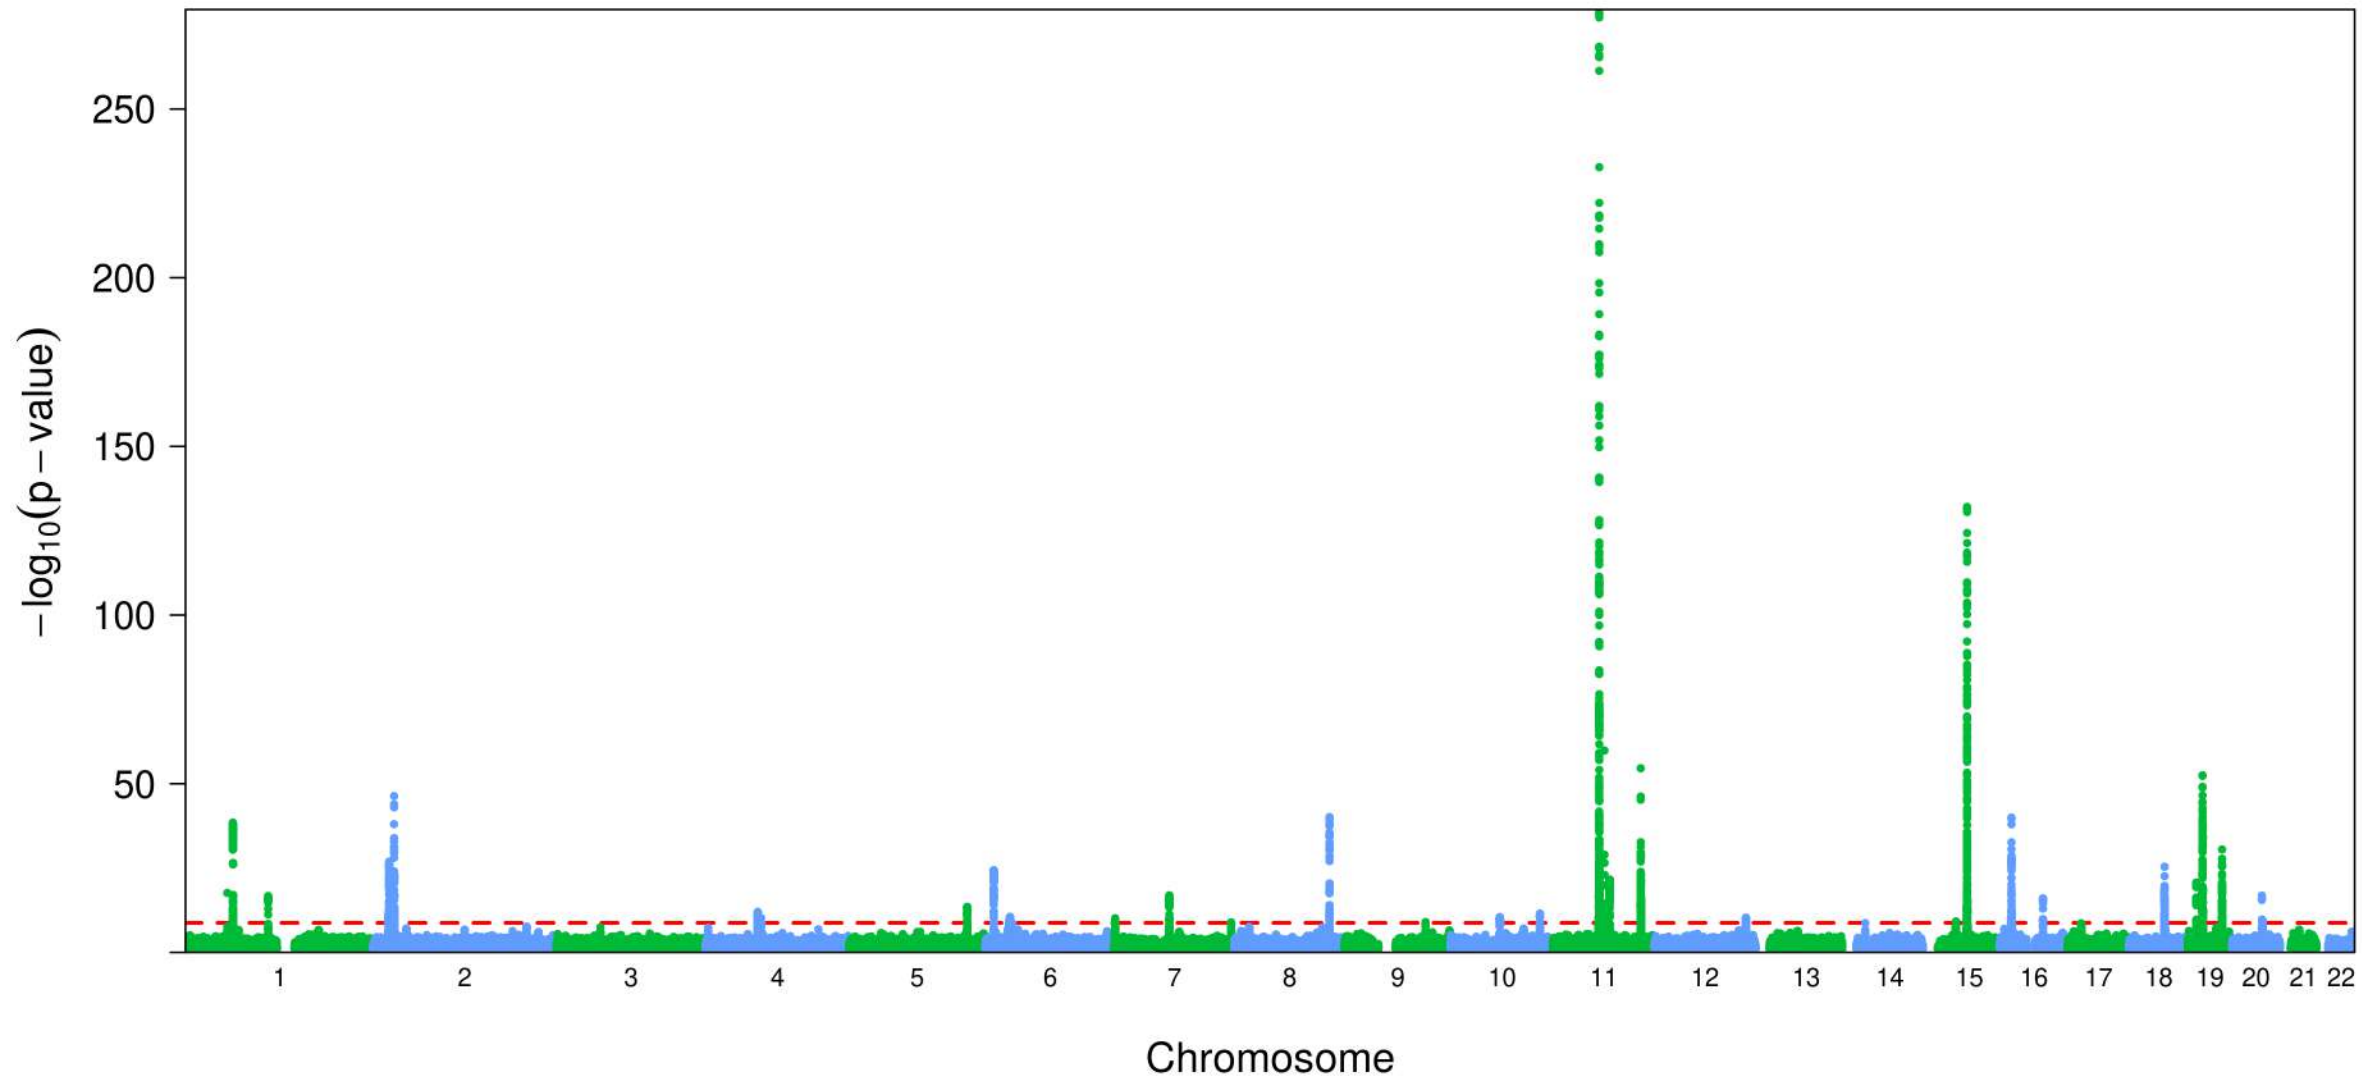

# DHAbyFA

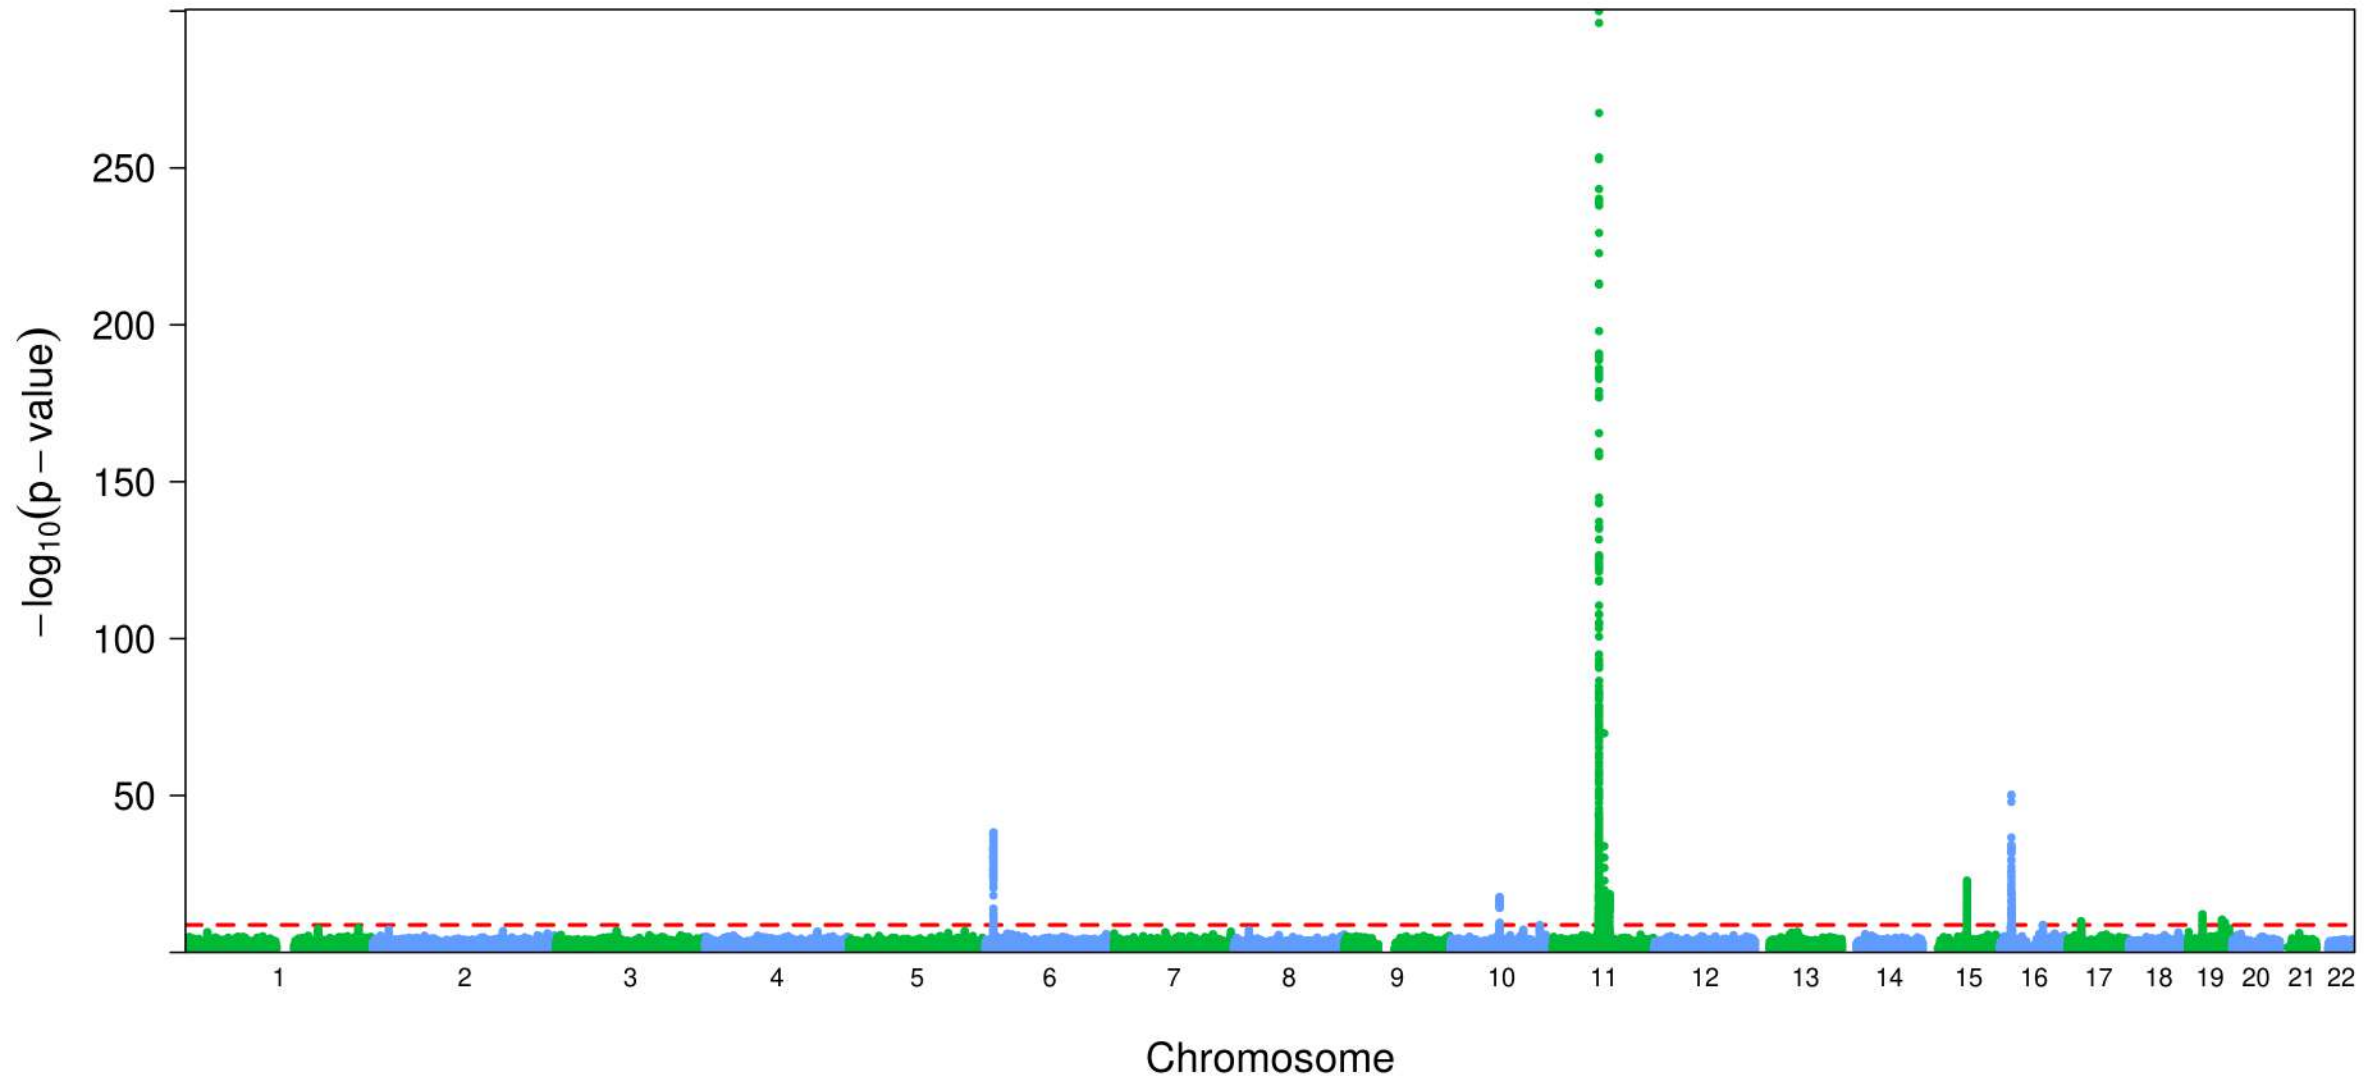



# EstC

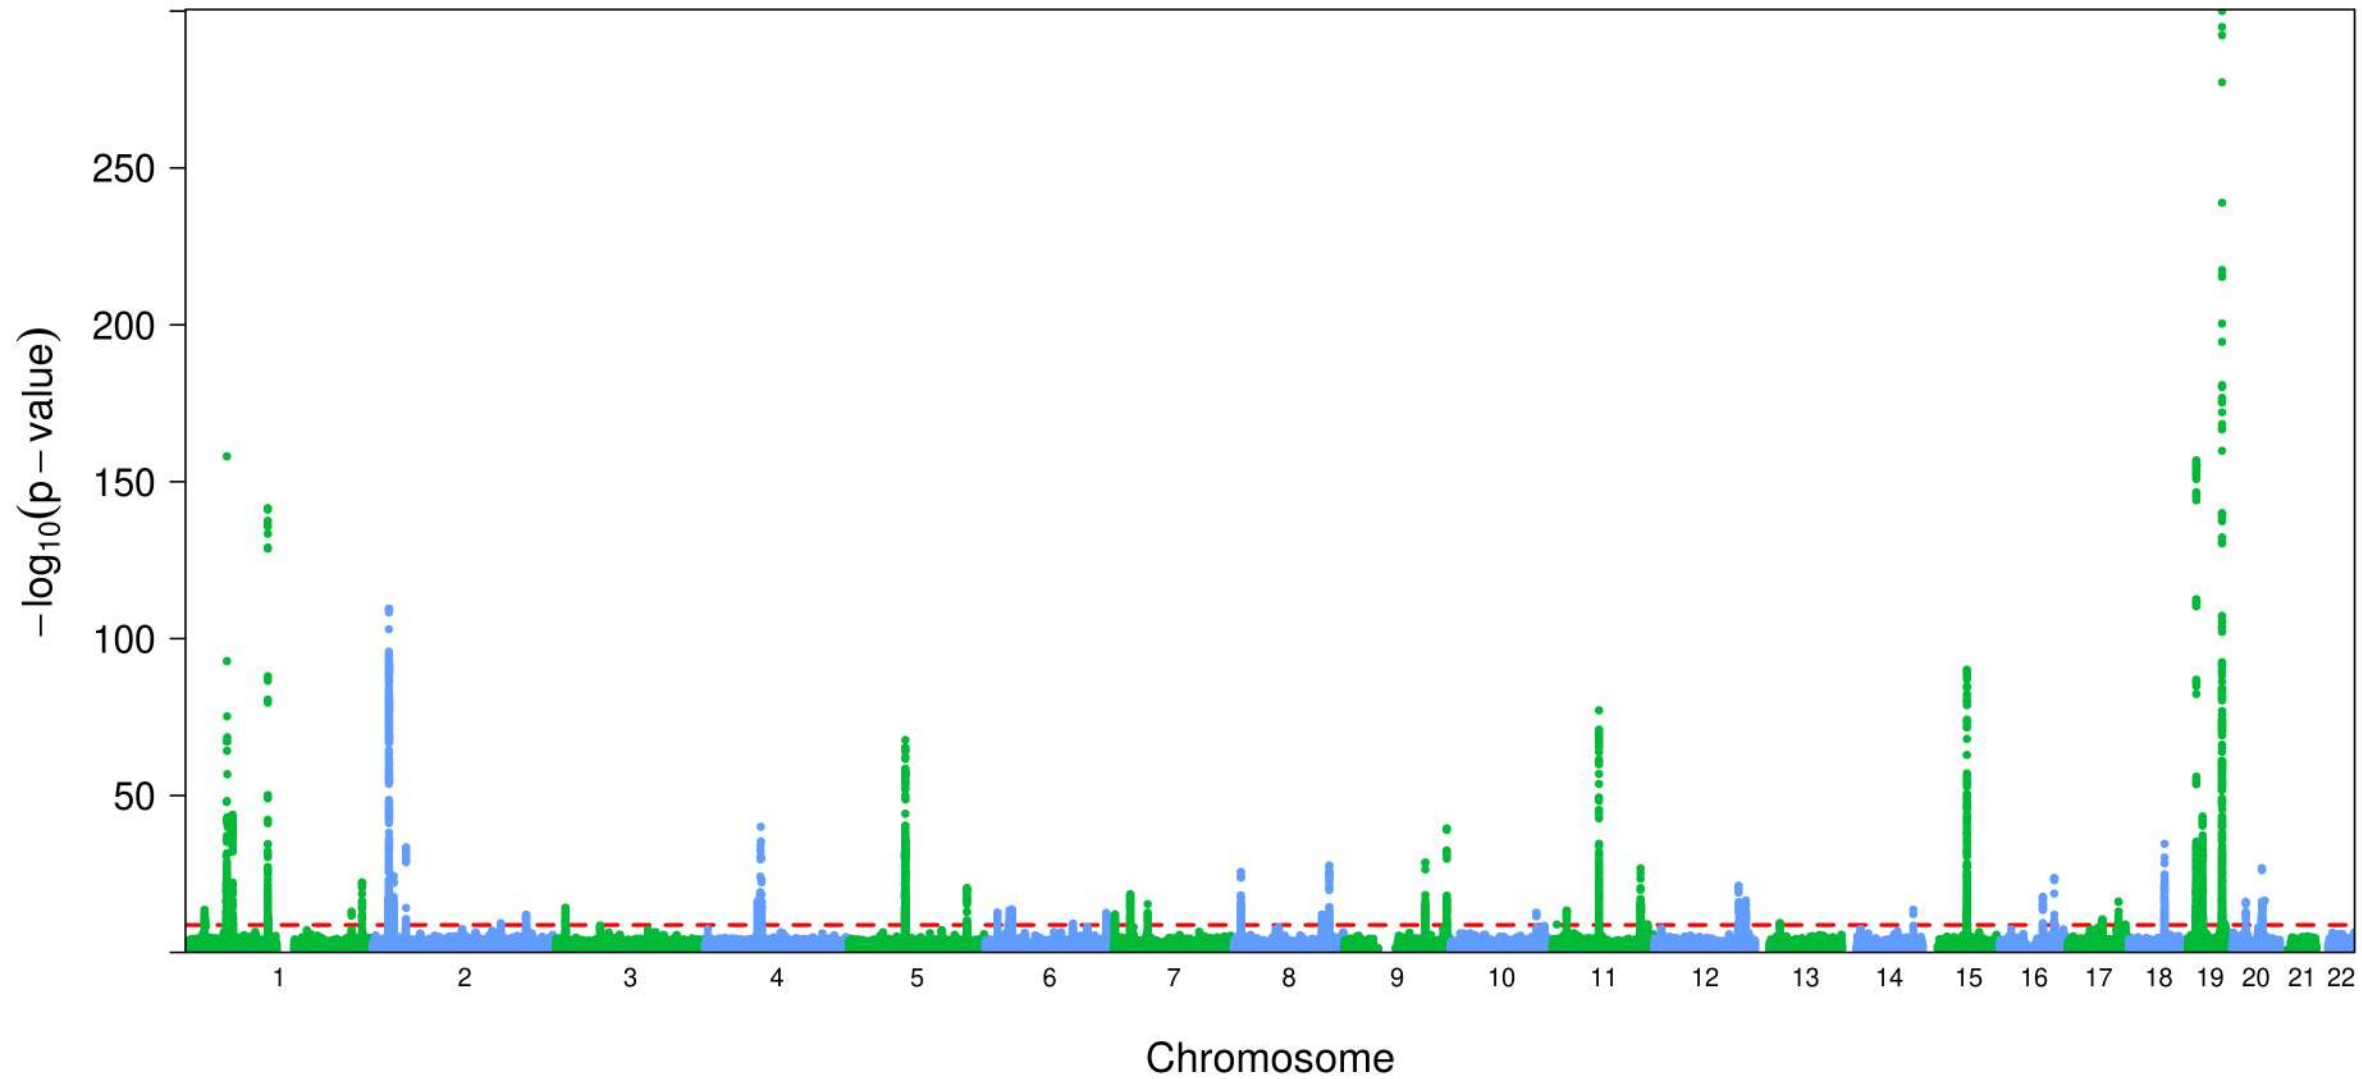

# FALen

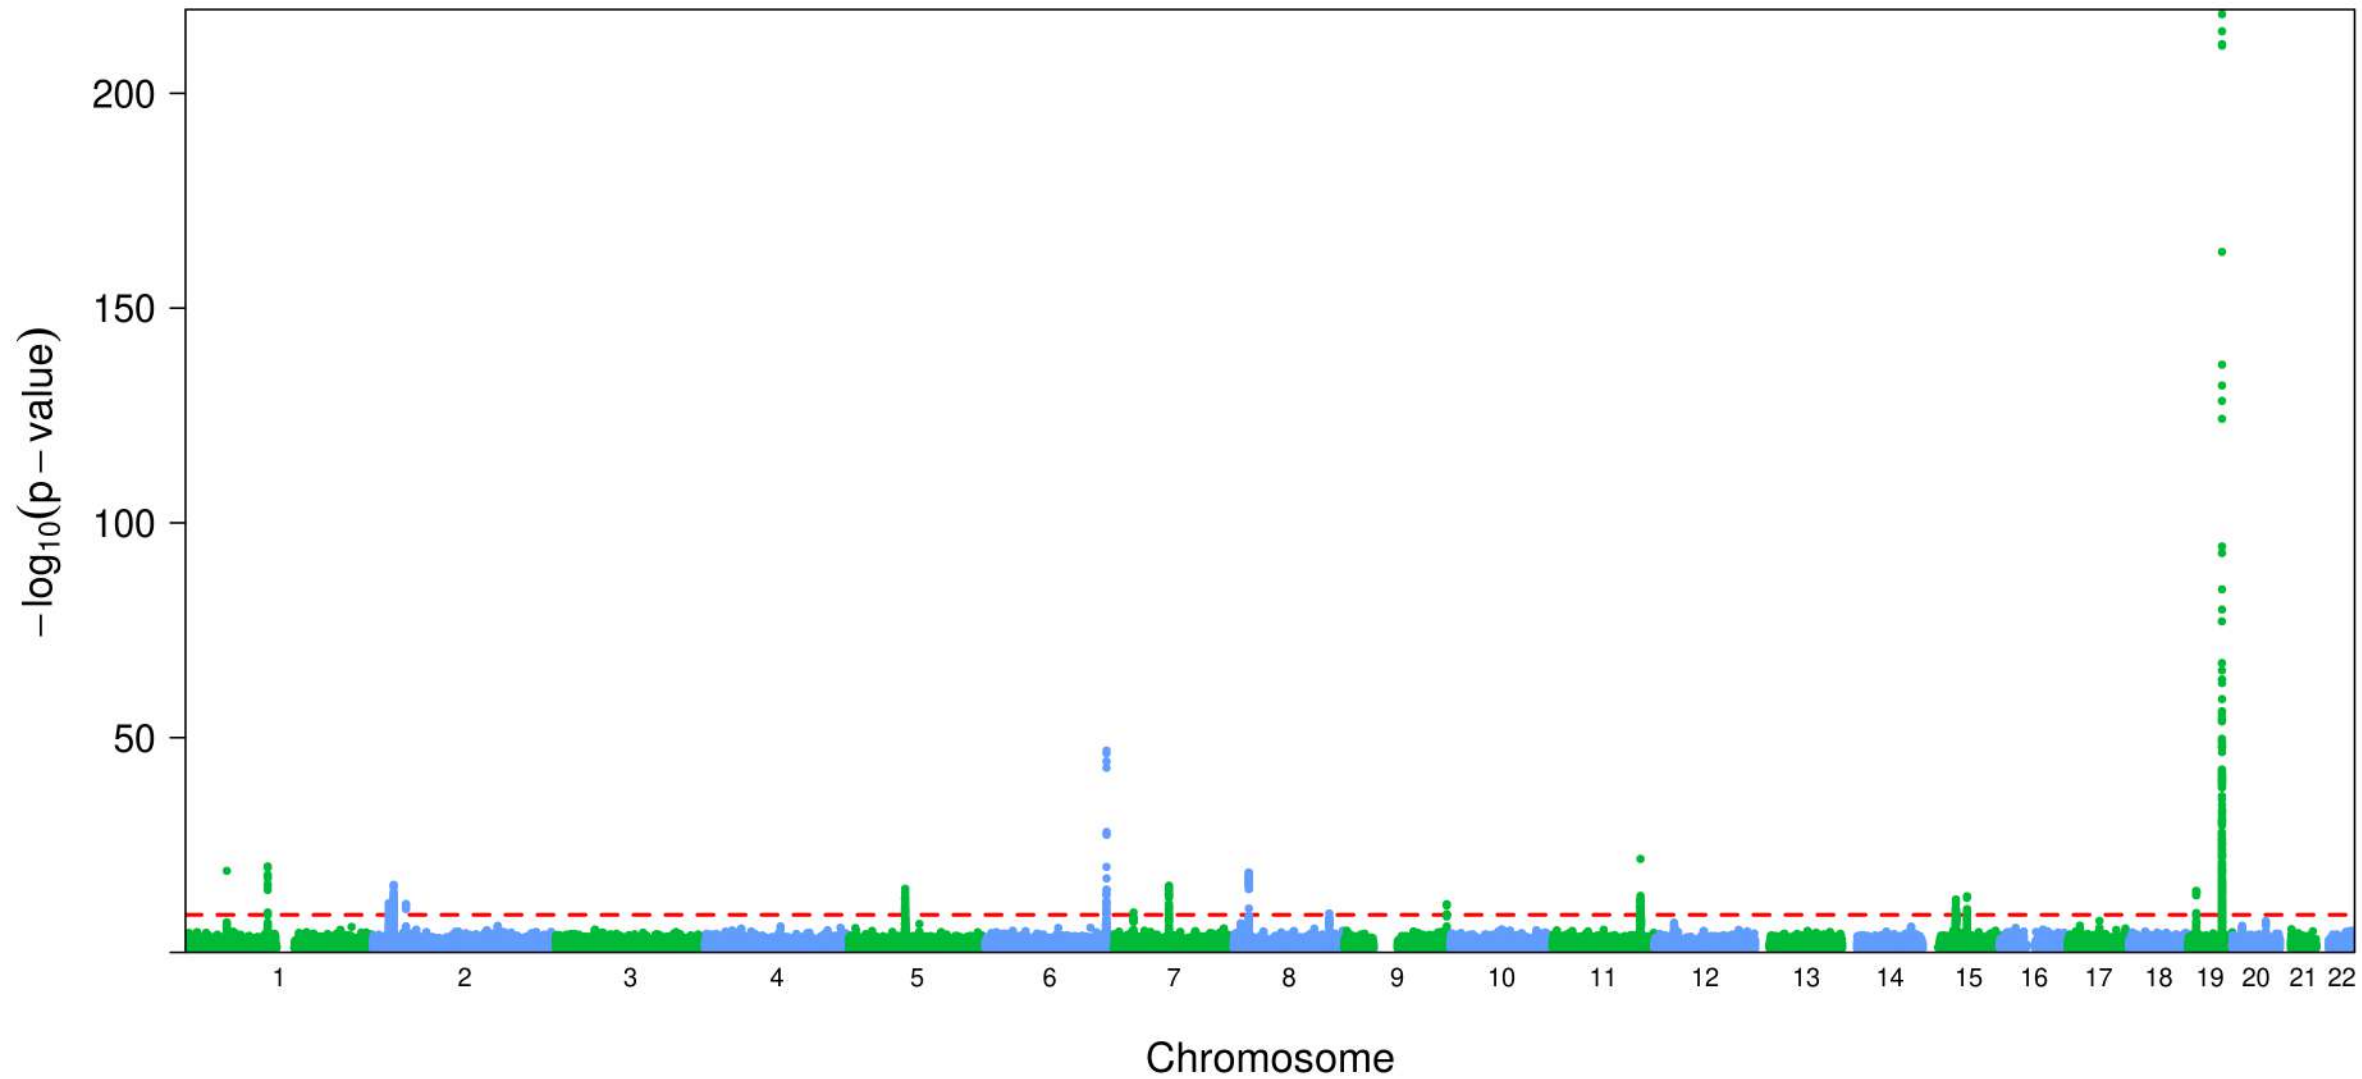

# FAw3

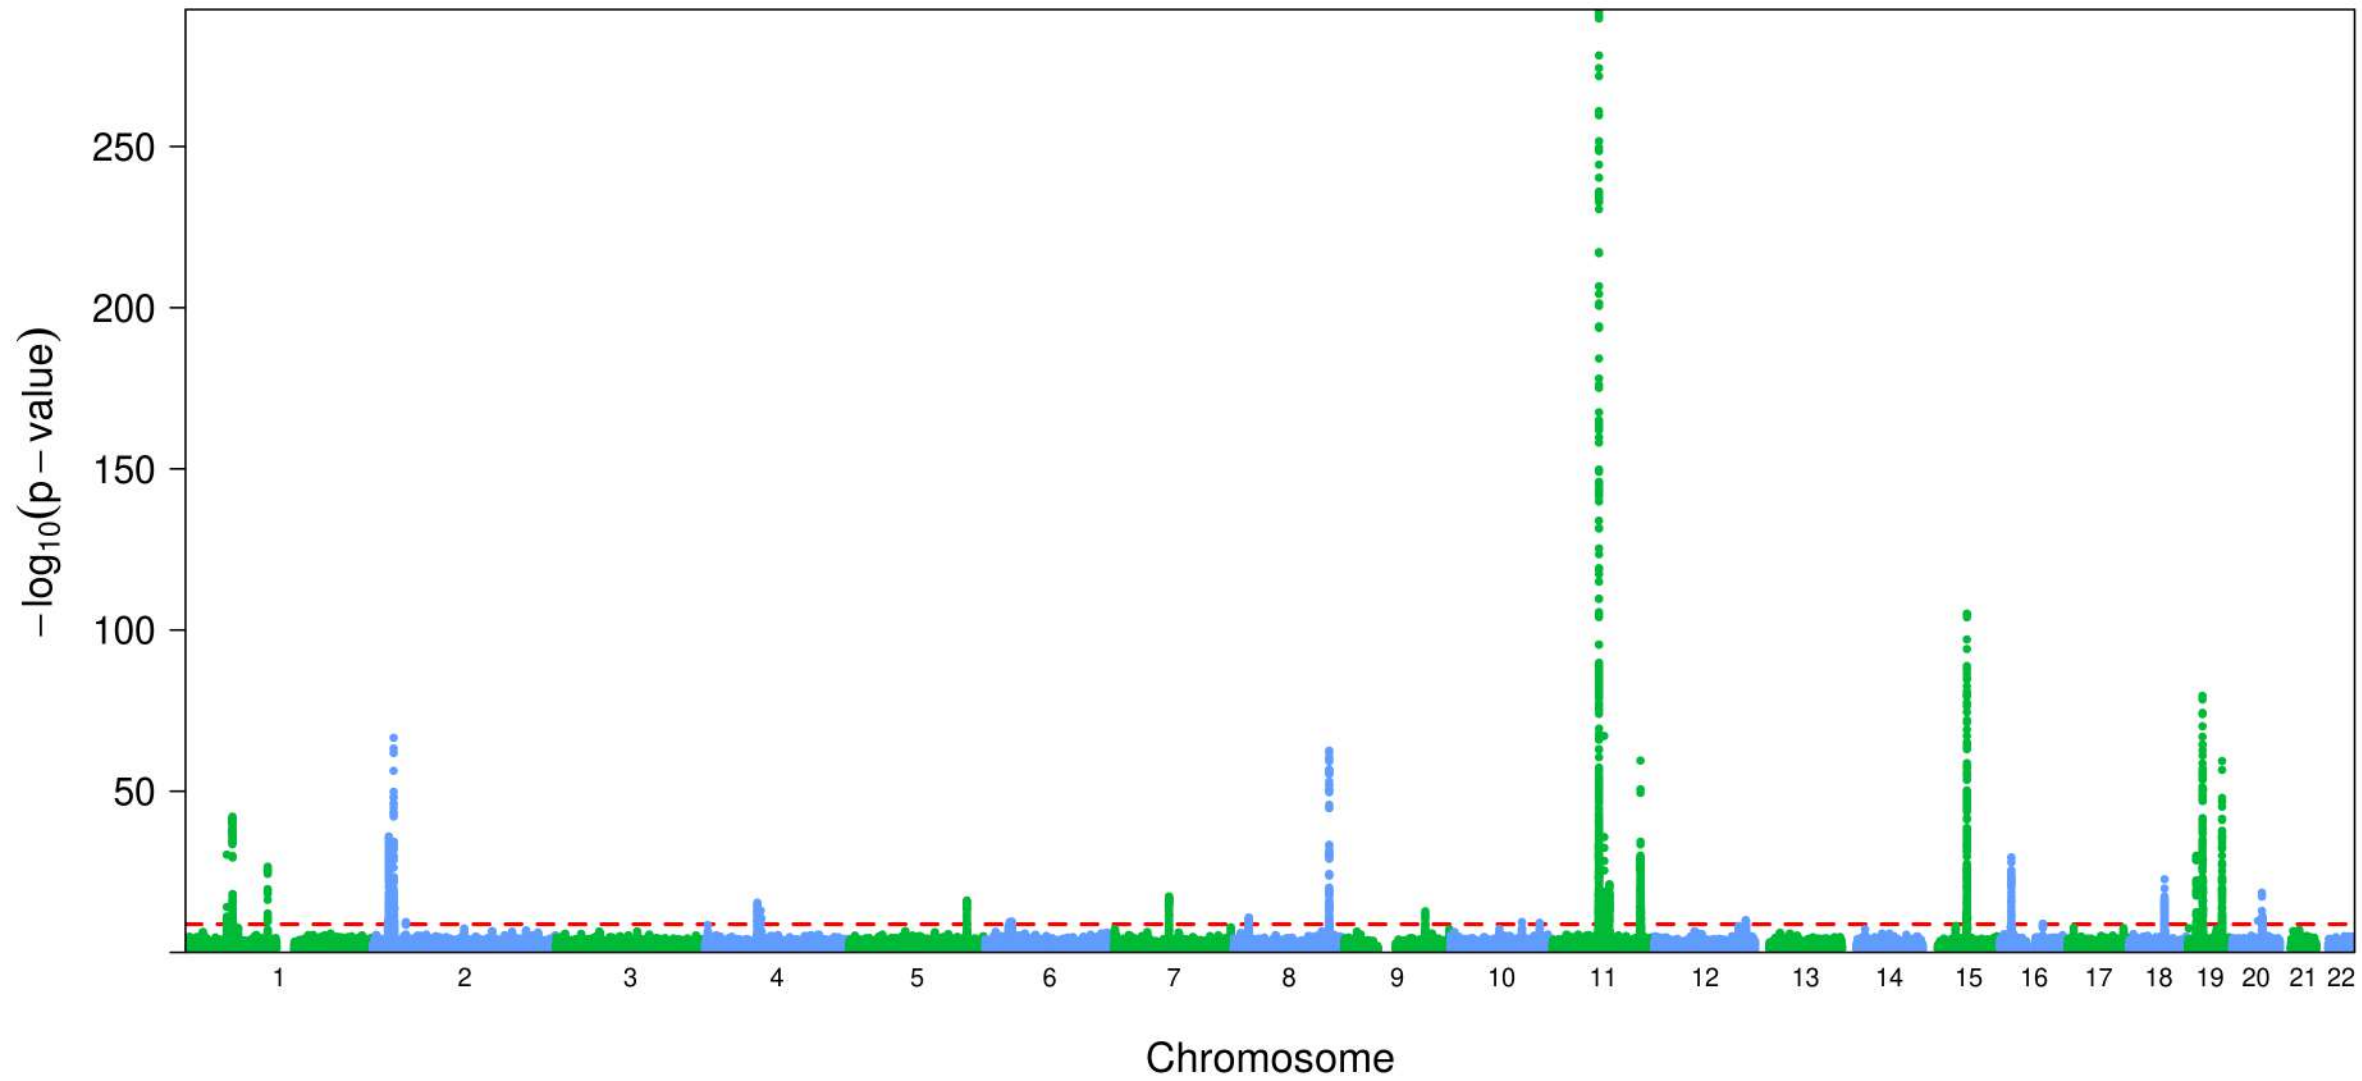

# FAw3byFA

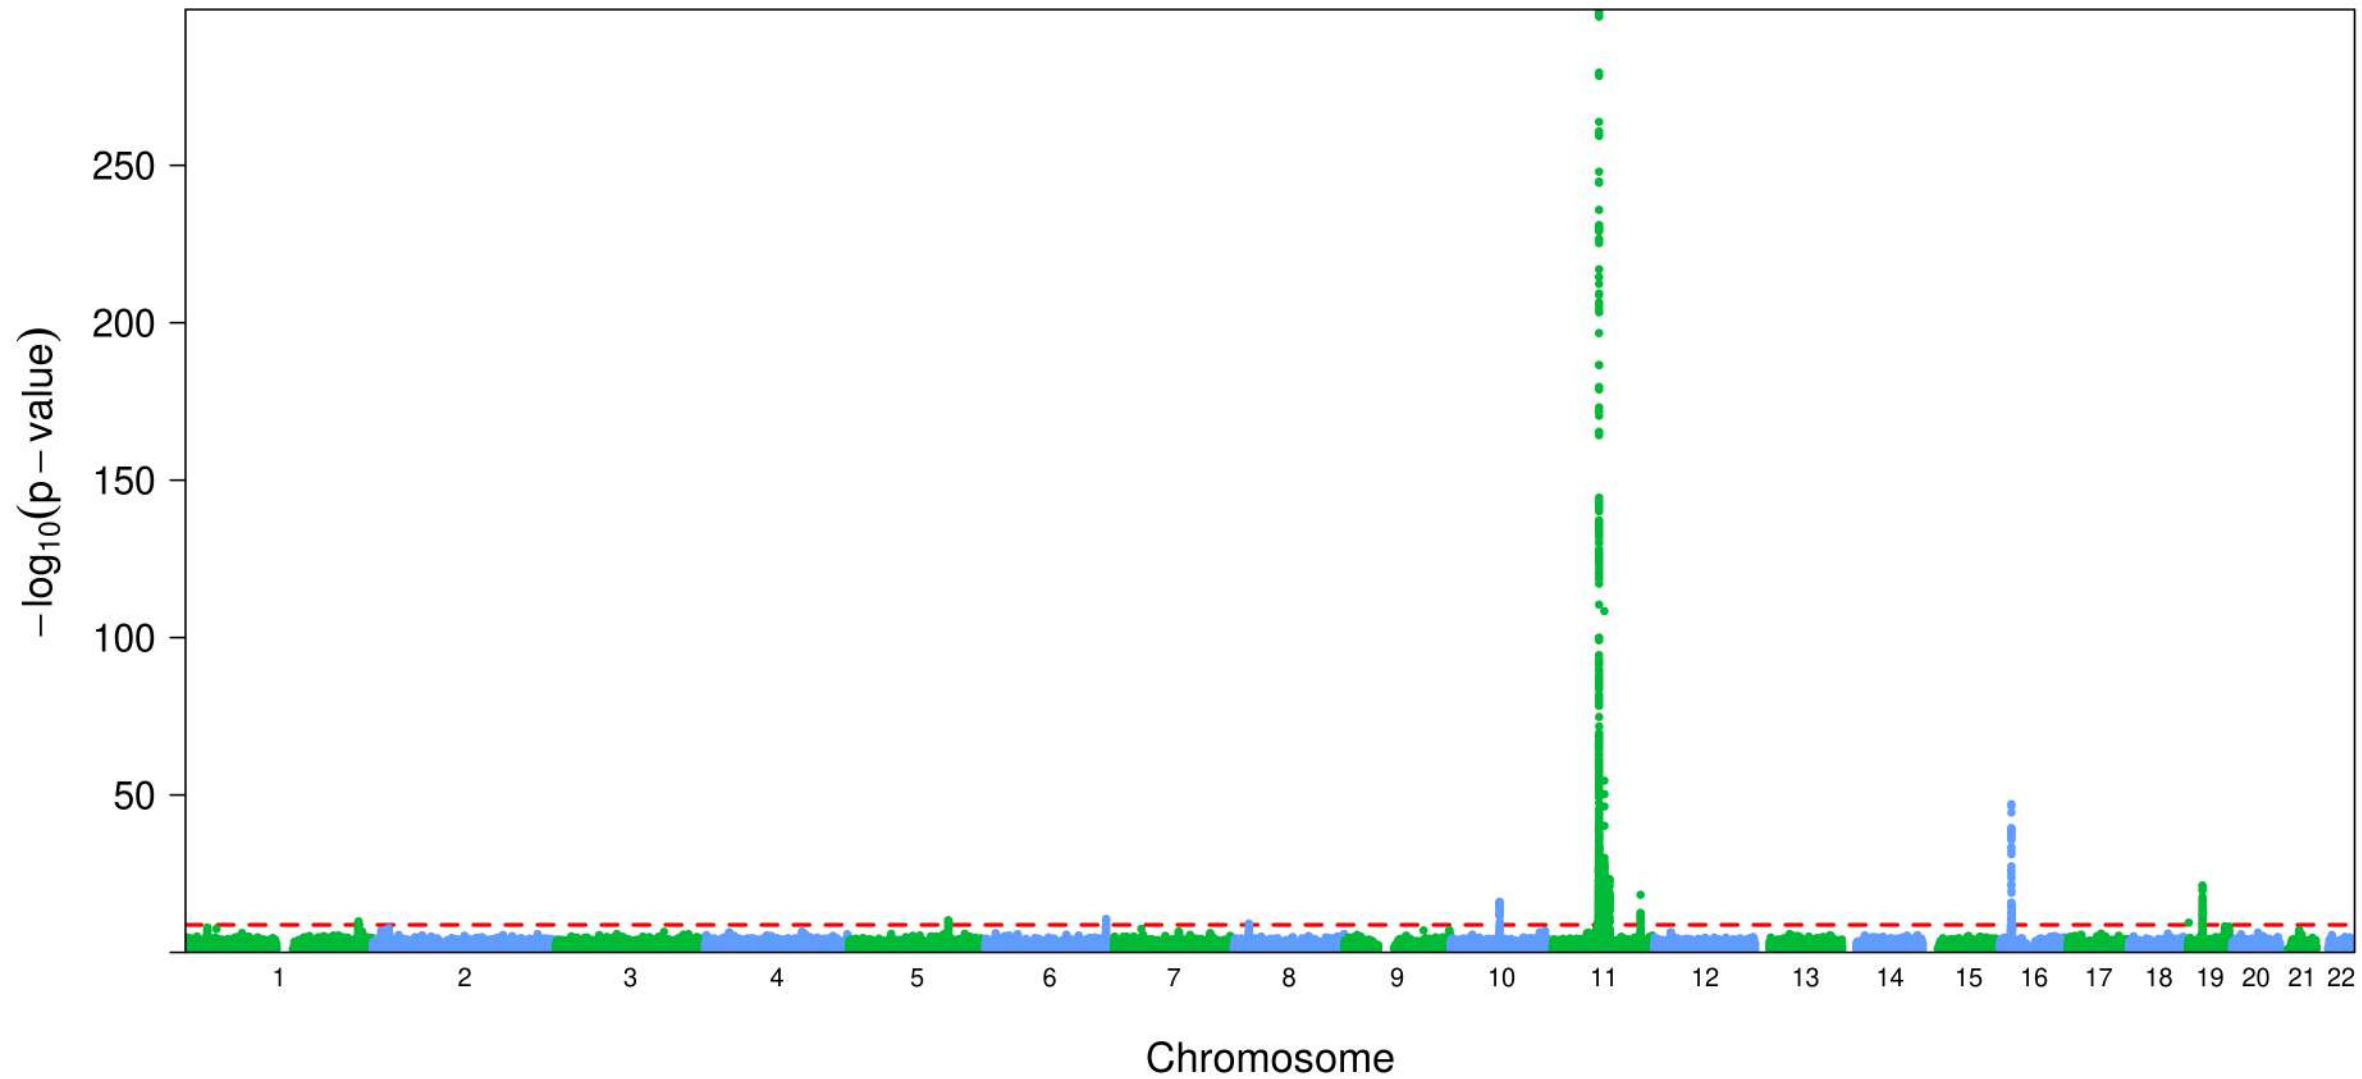

## FAw6

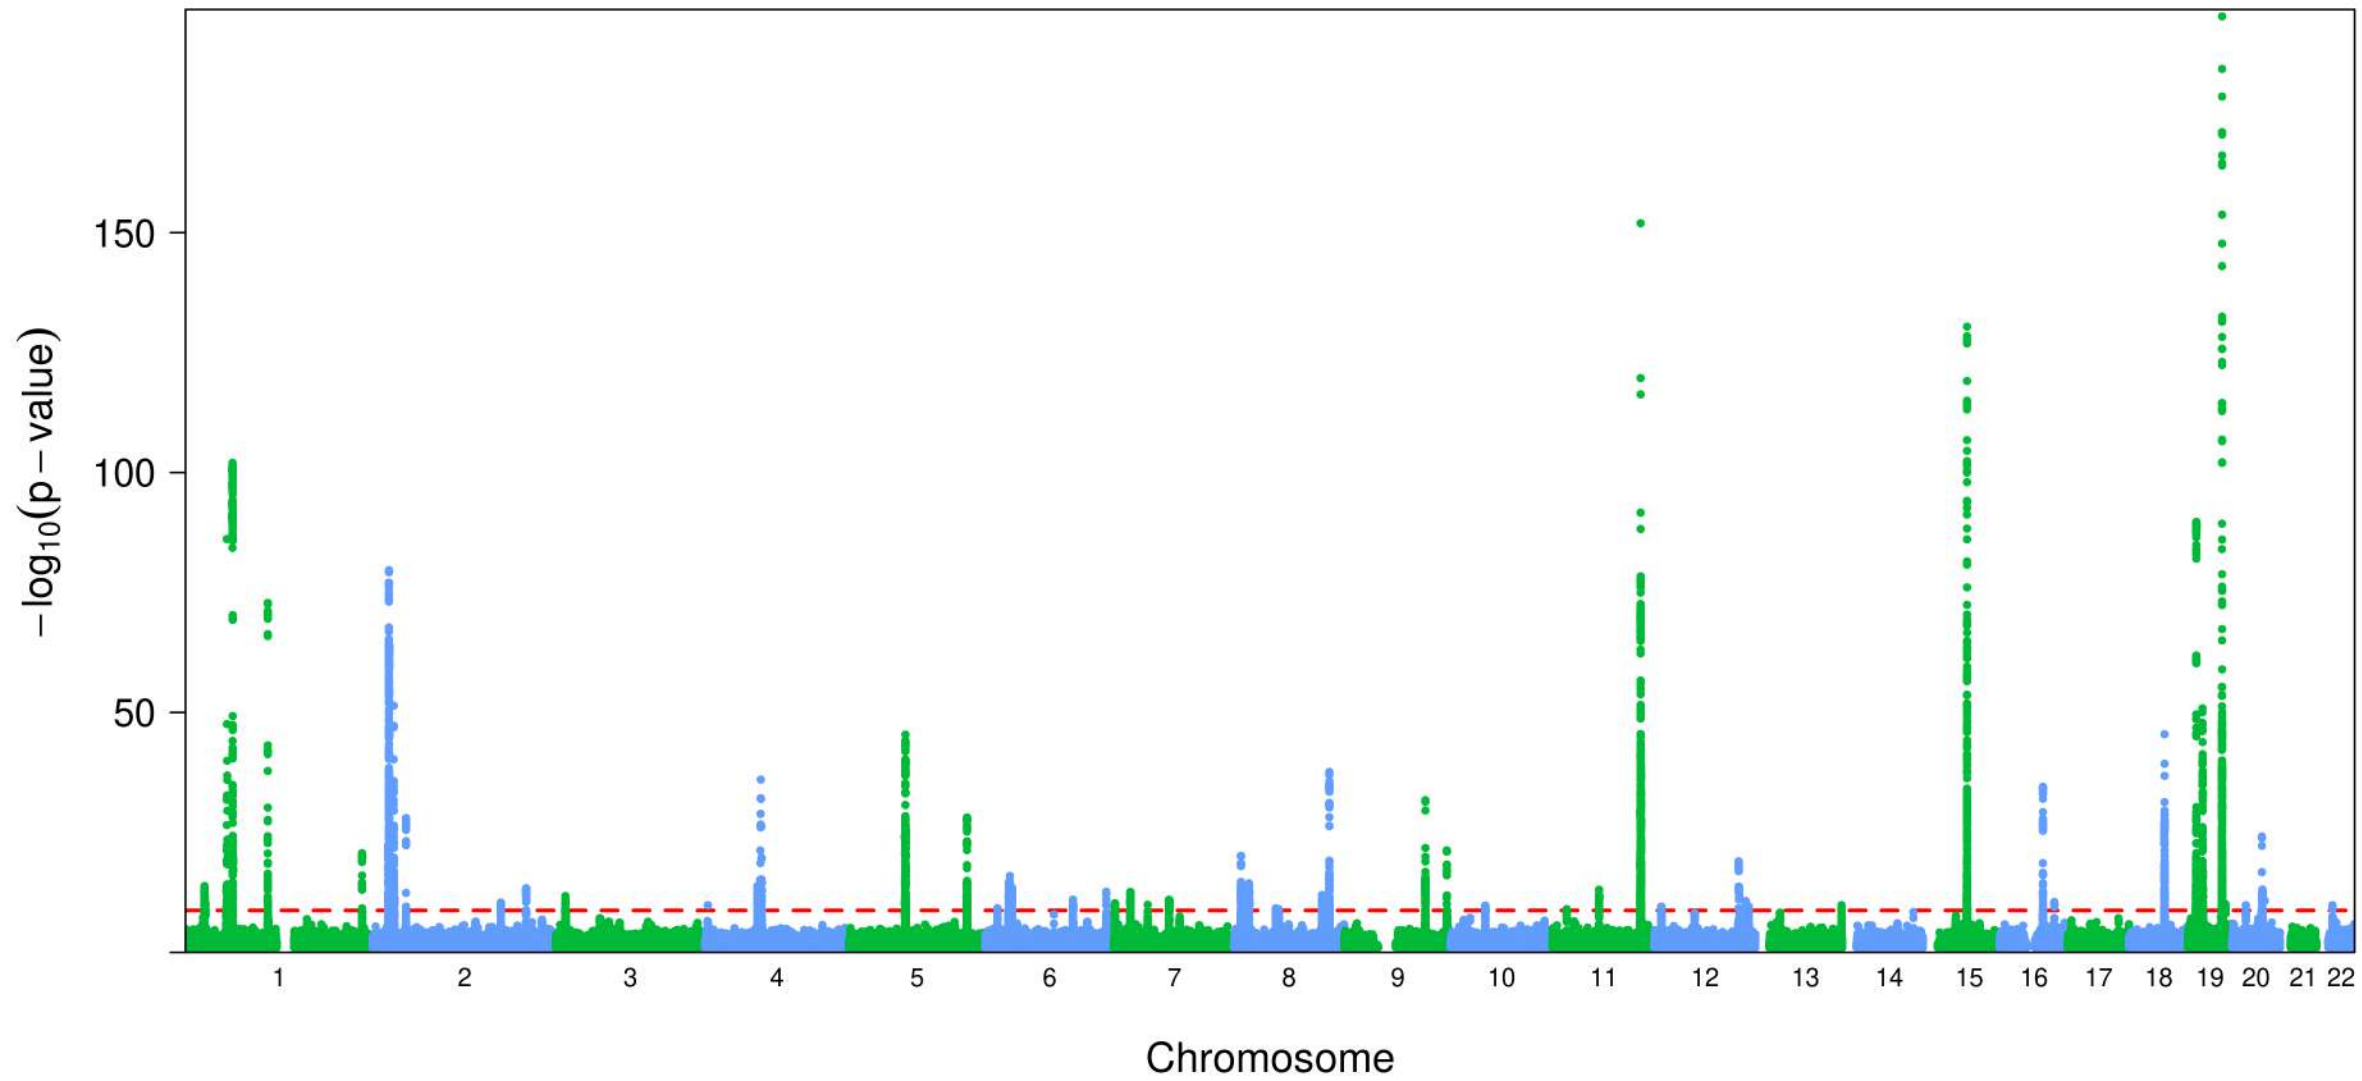

# FAw6byFA

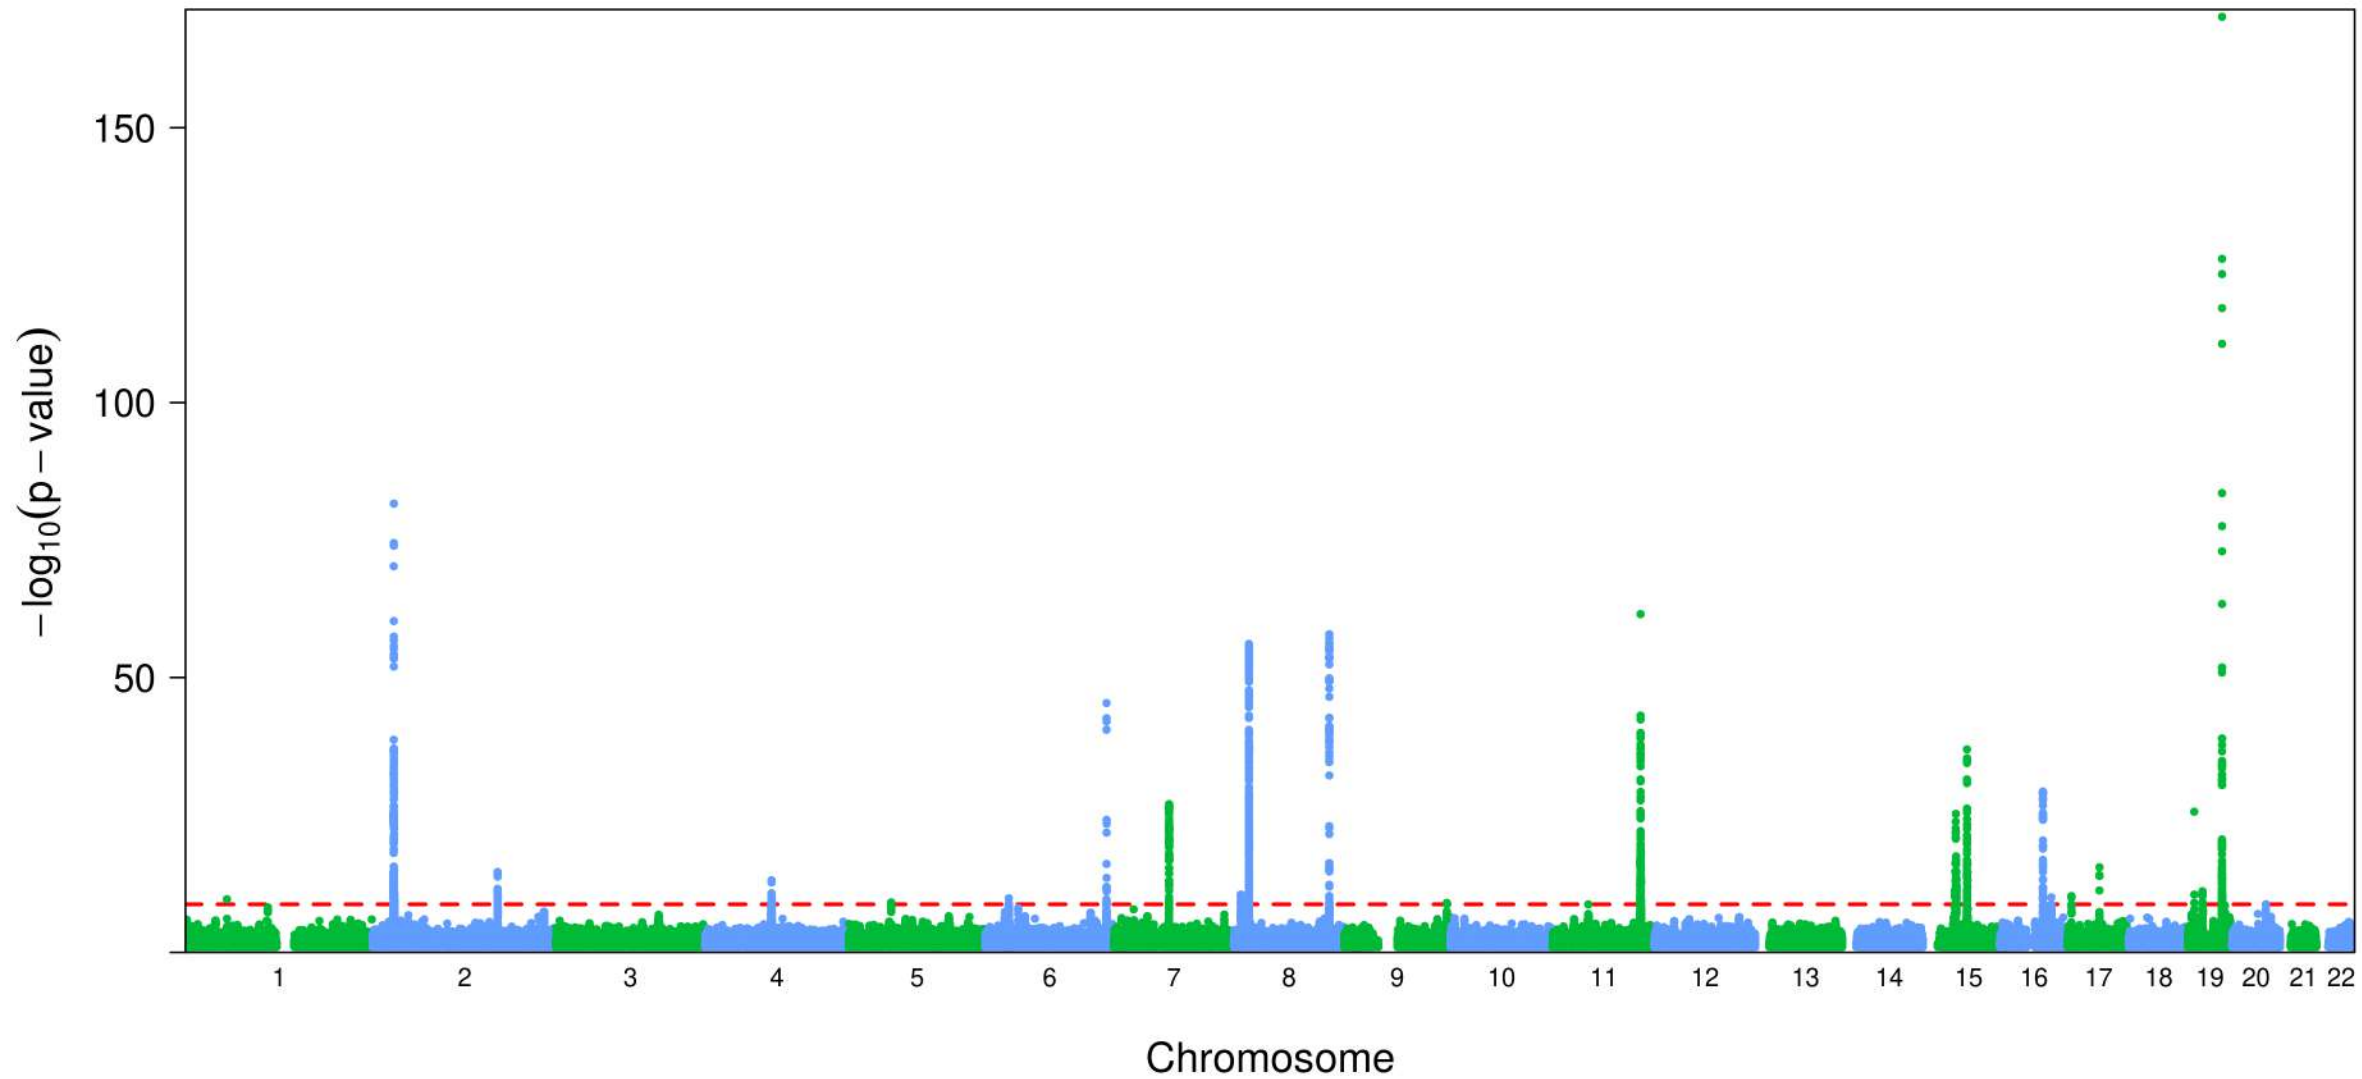

# FreeC

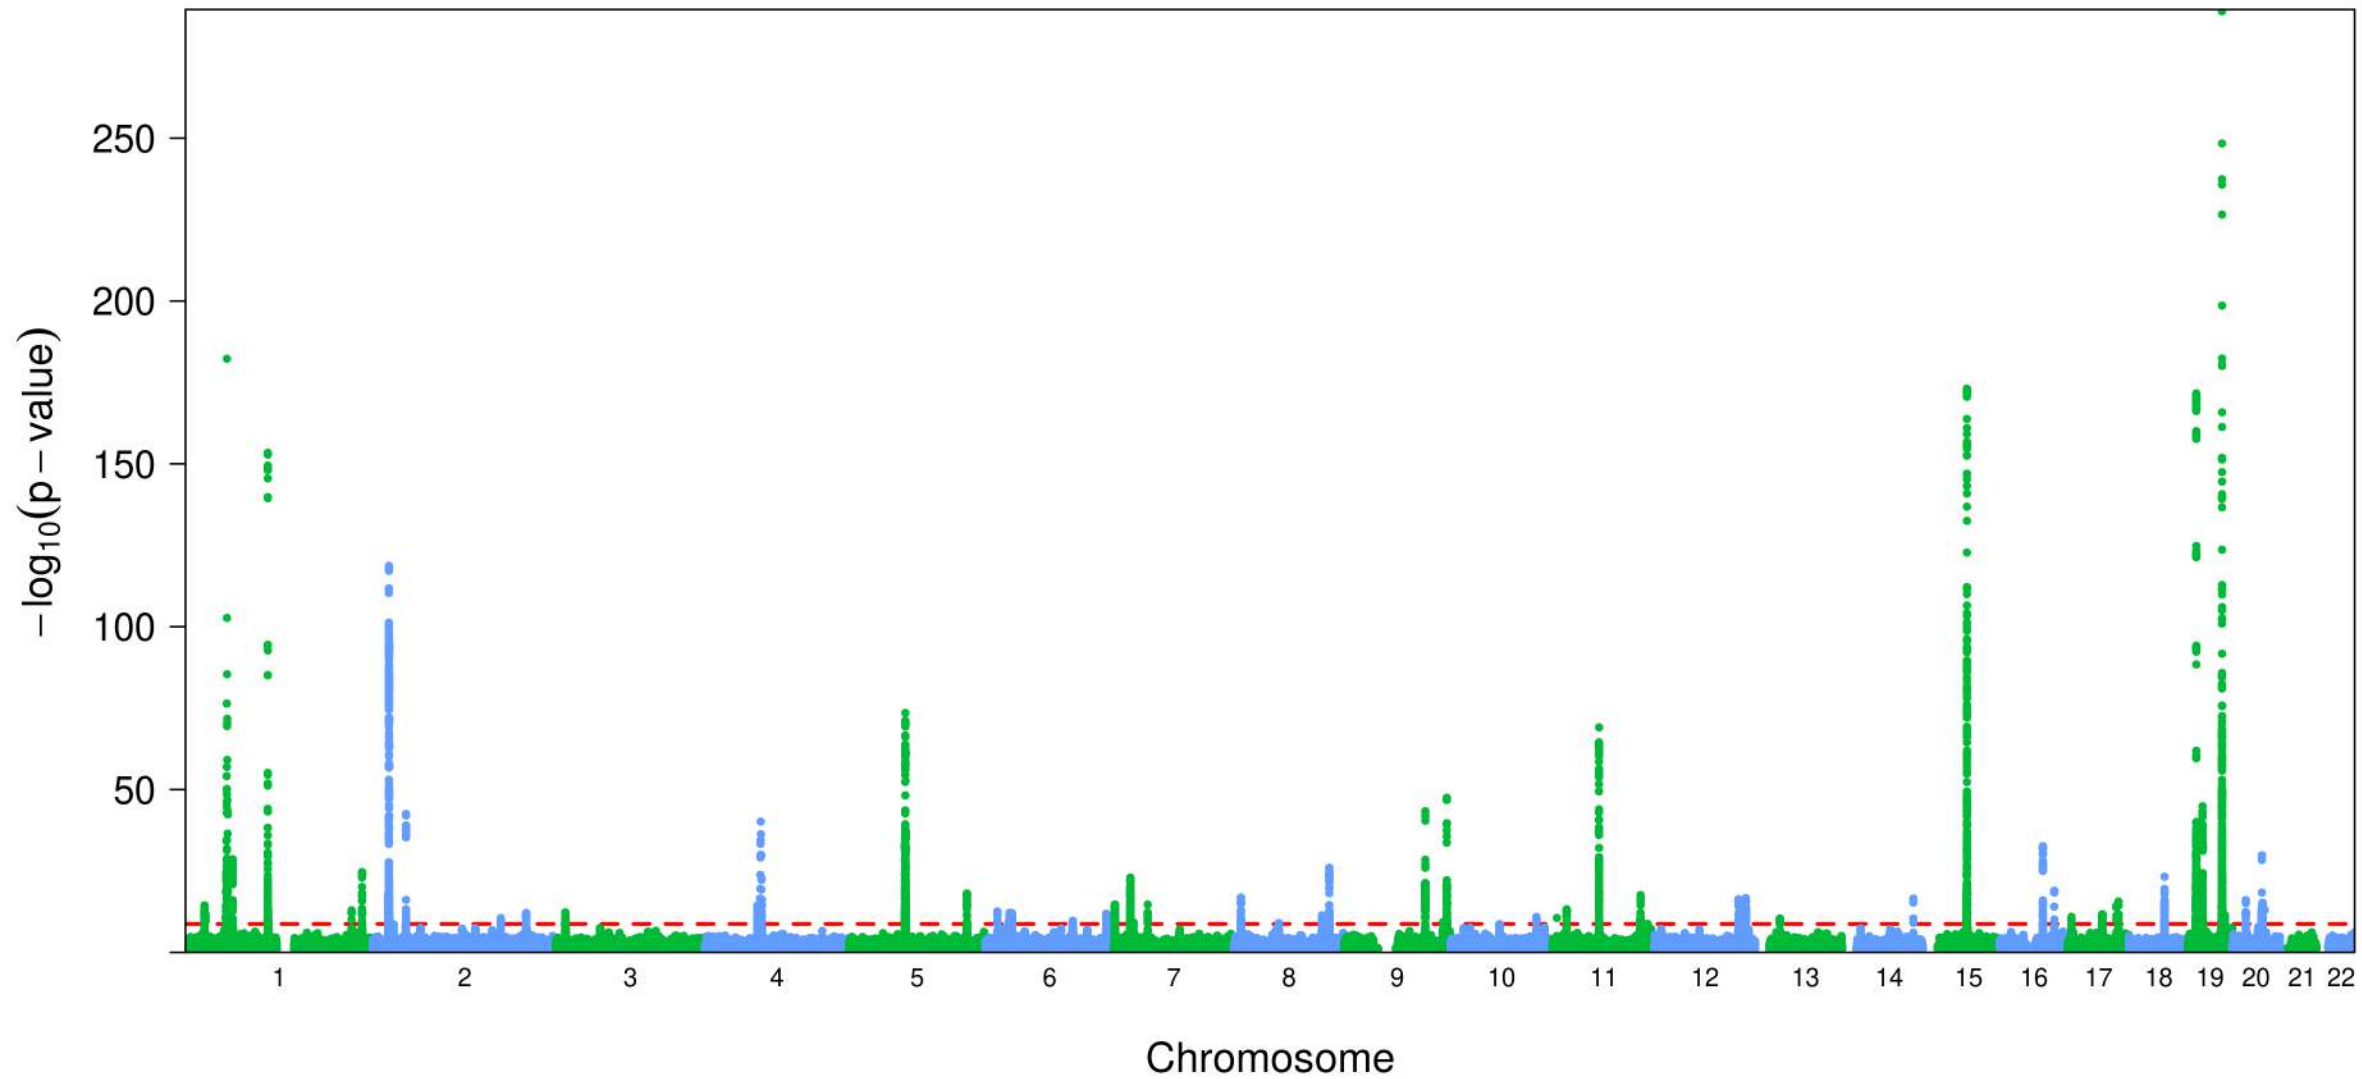

# Glc

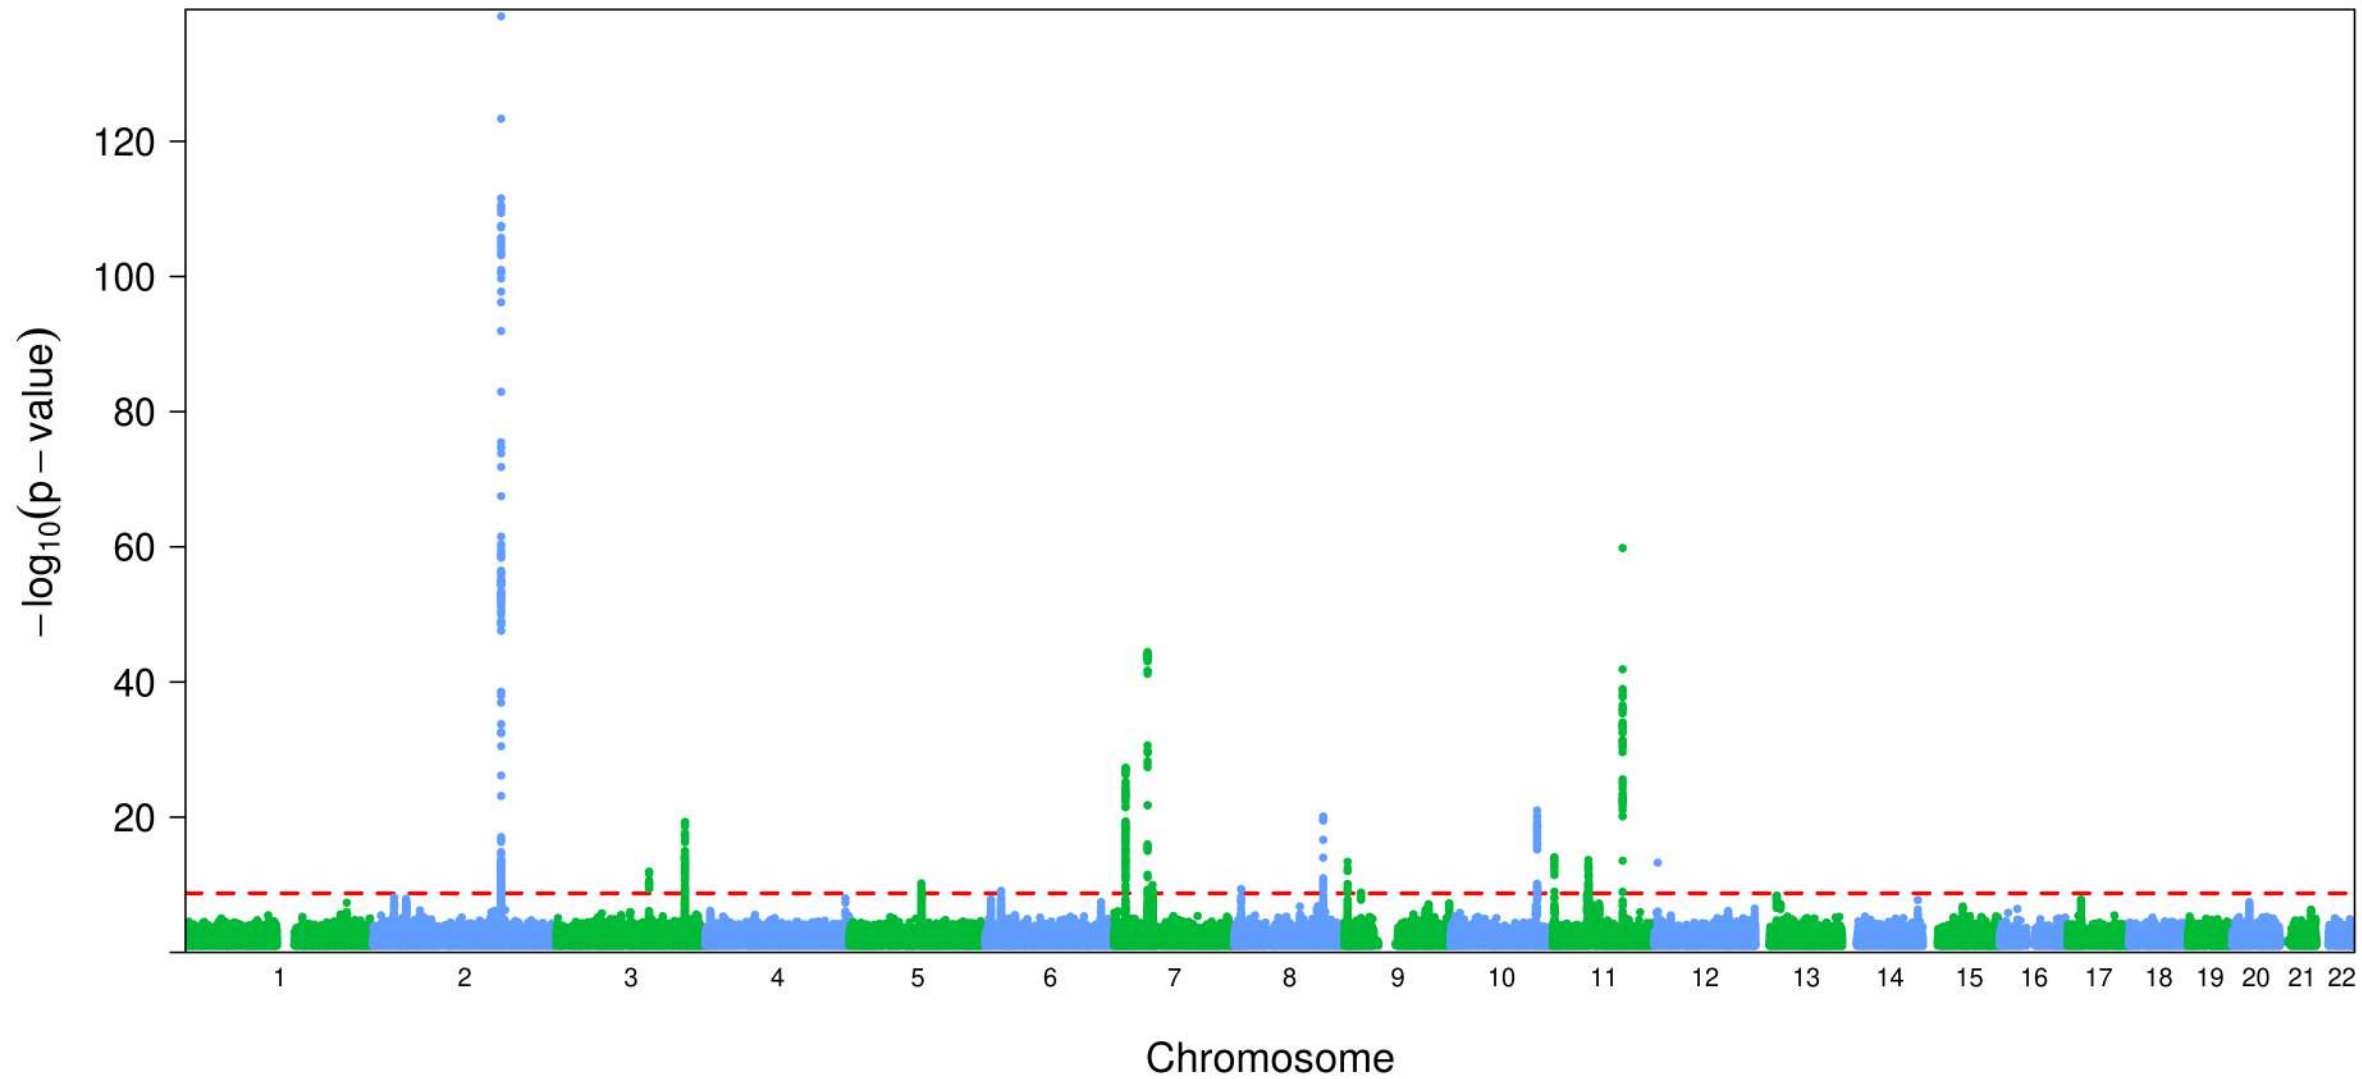



# Gln

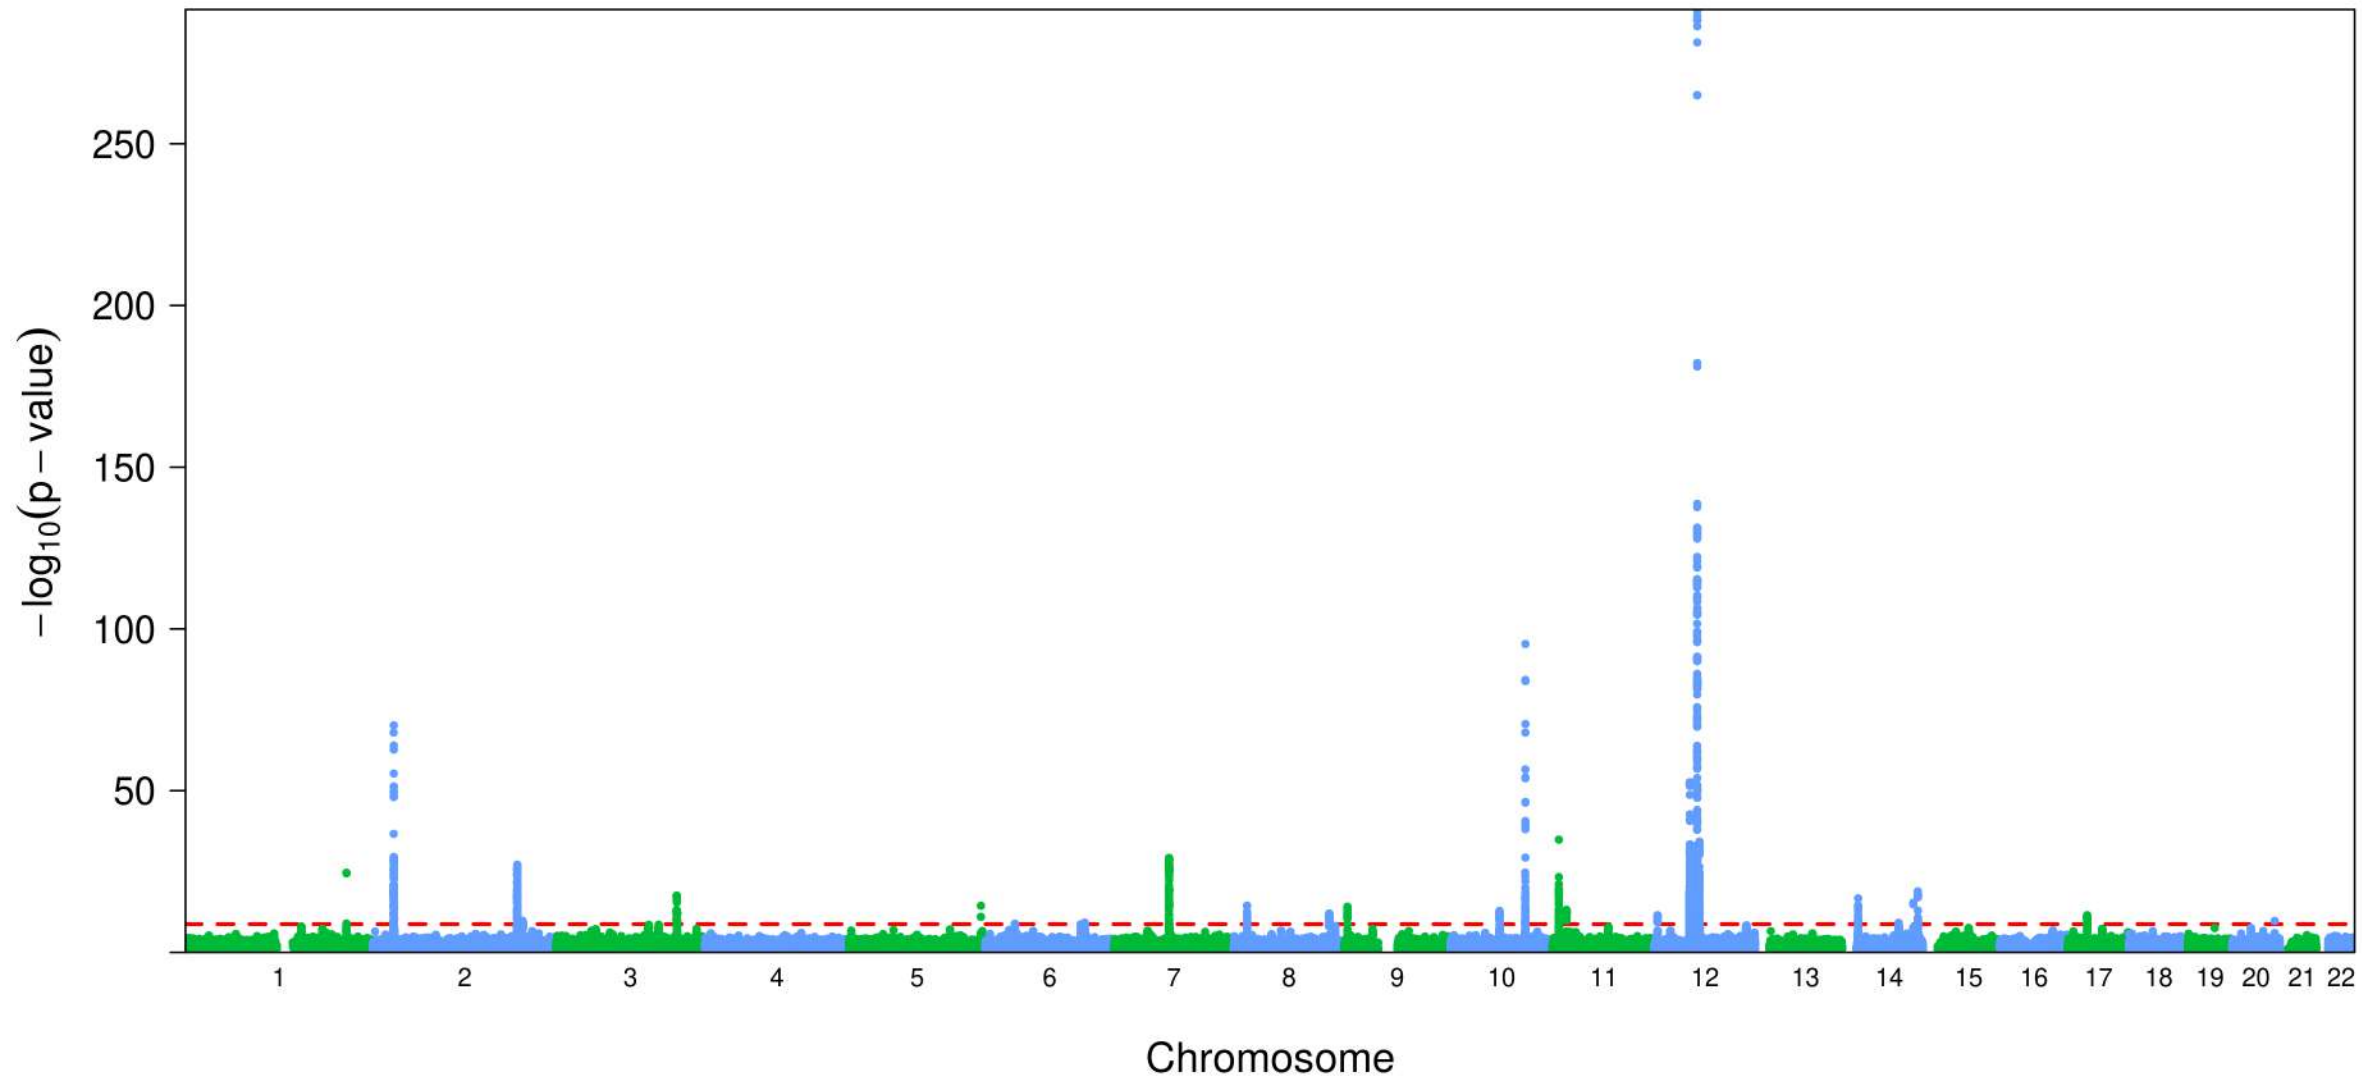

# Glo1

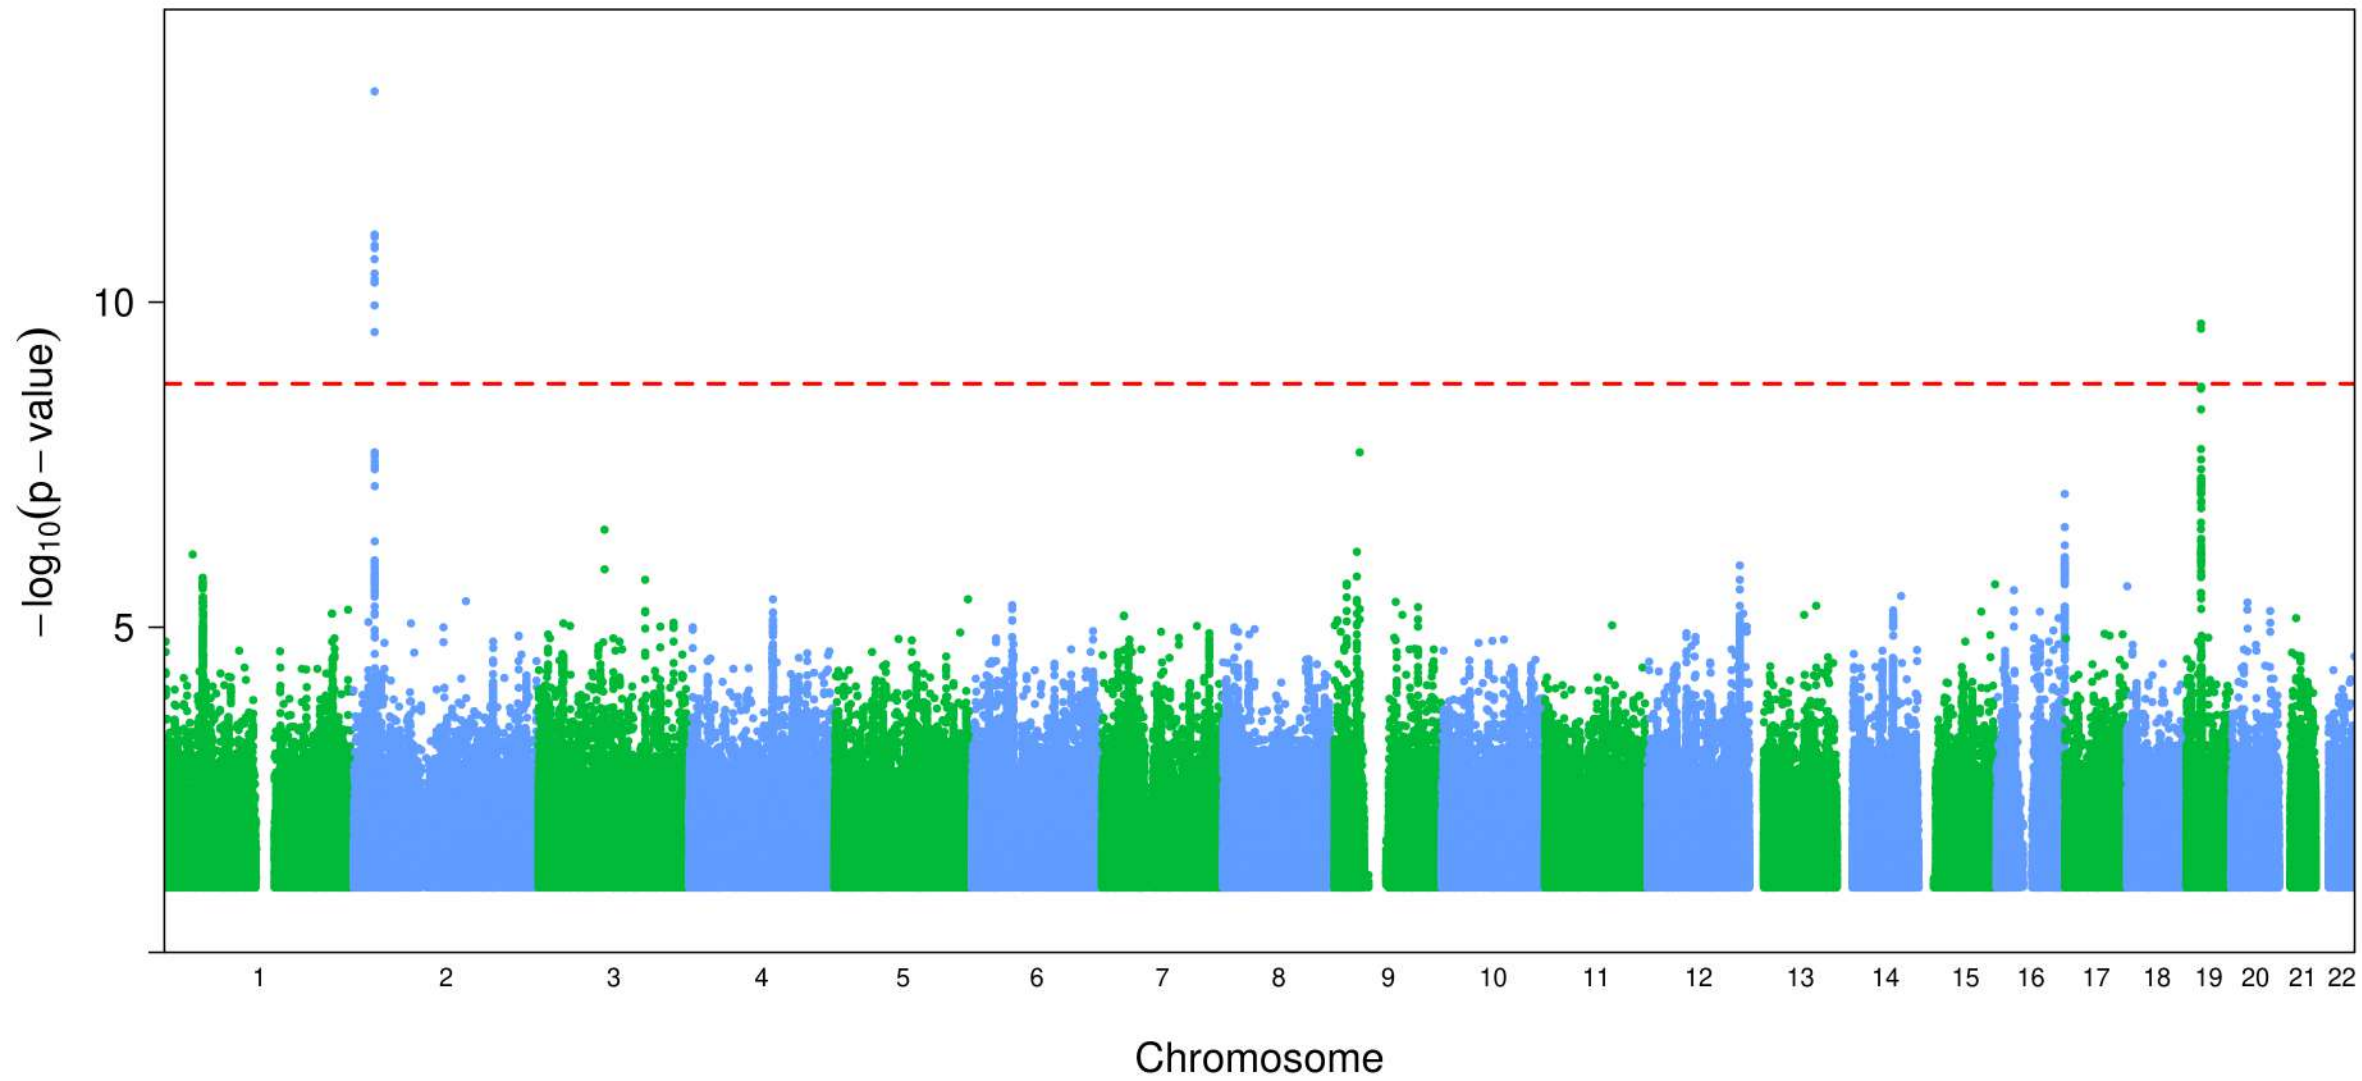

# Gly

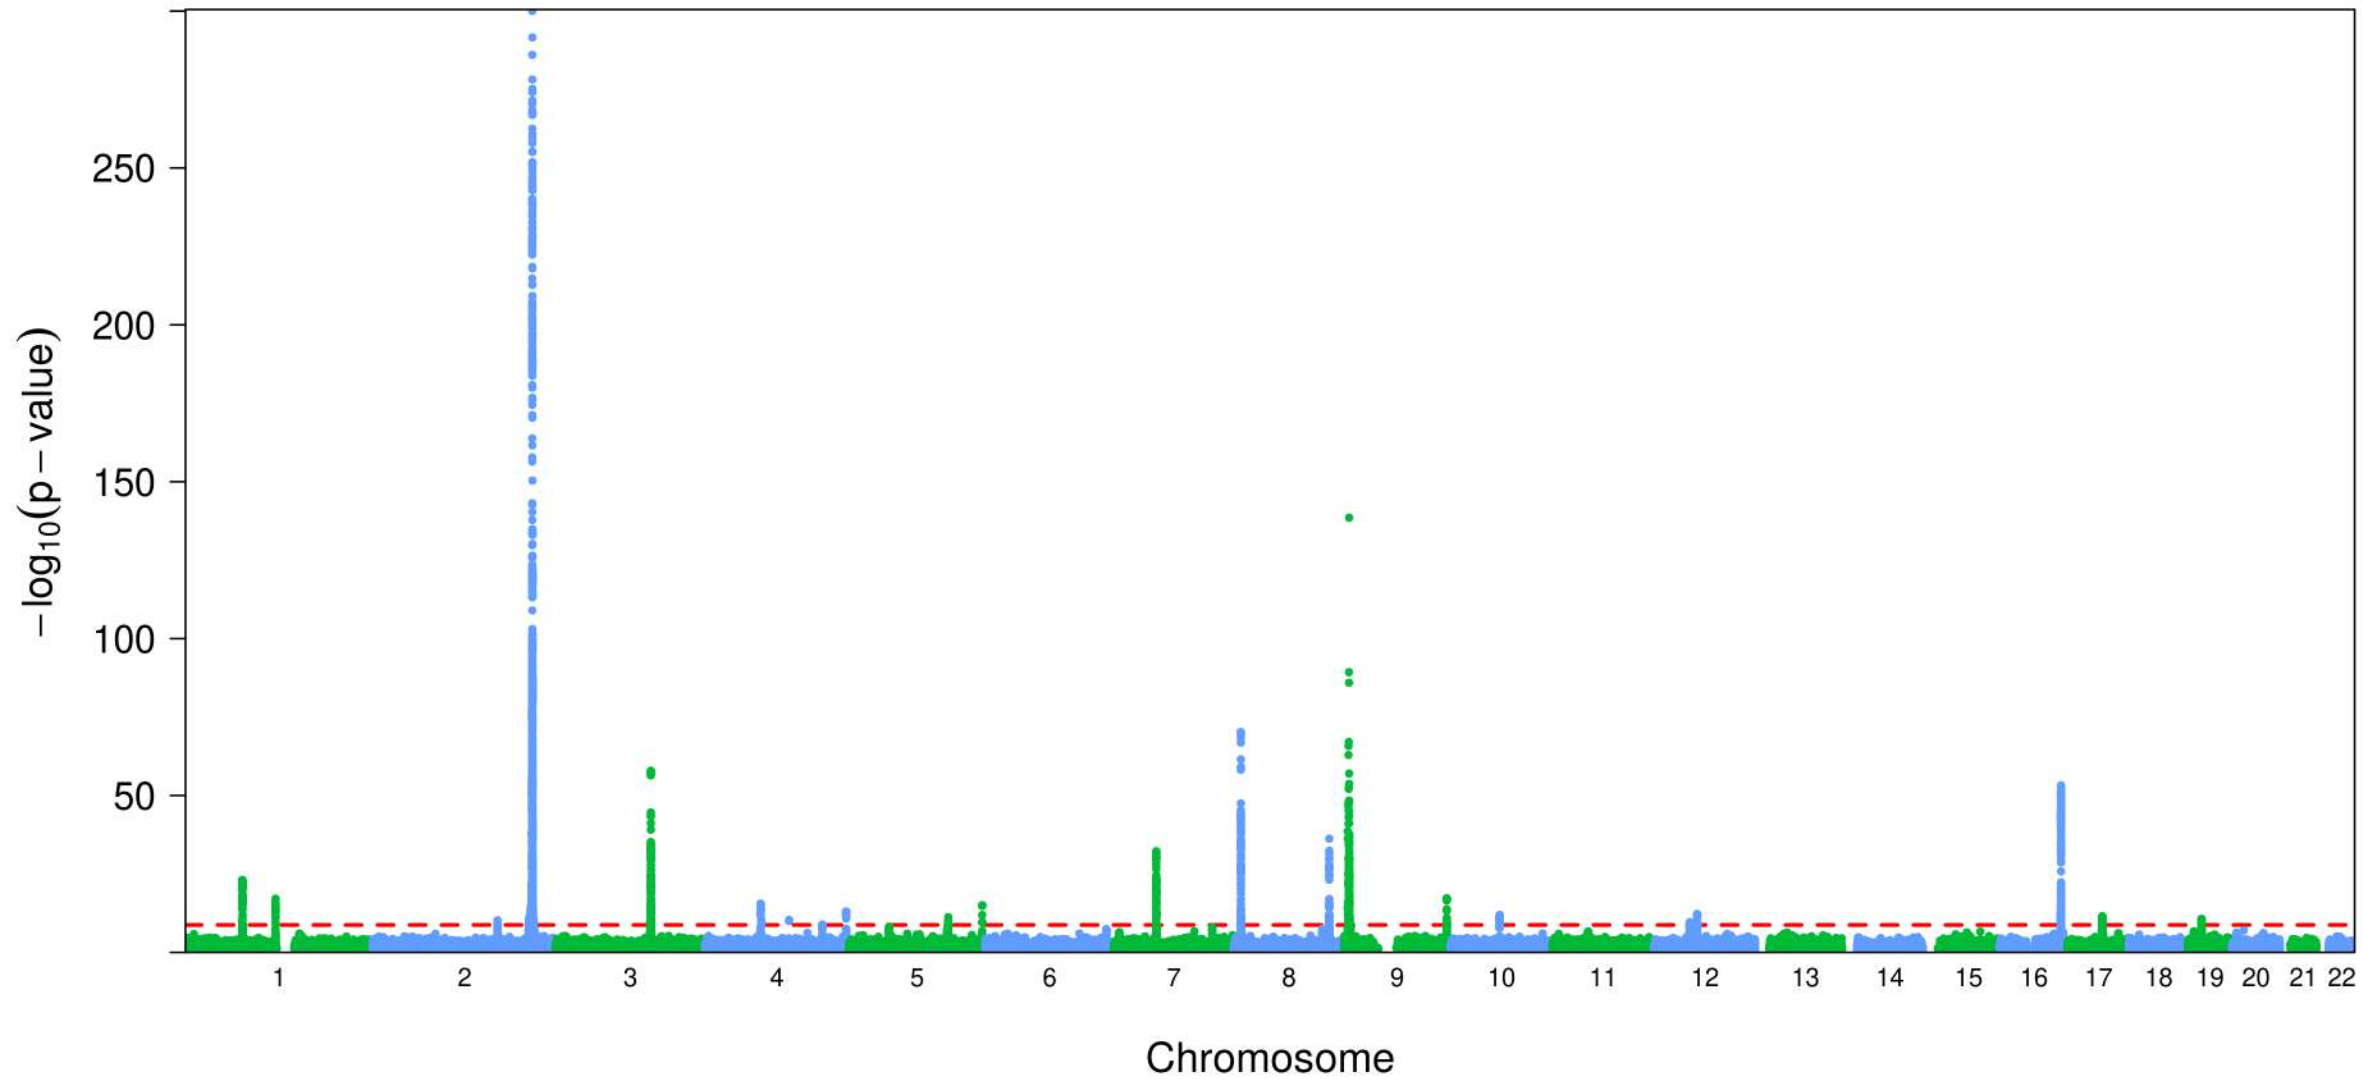

# GlycA

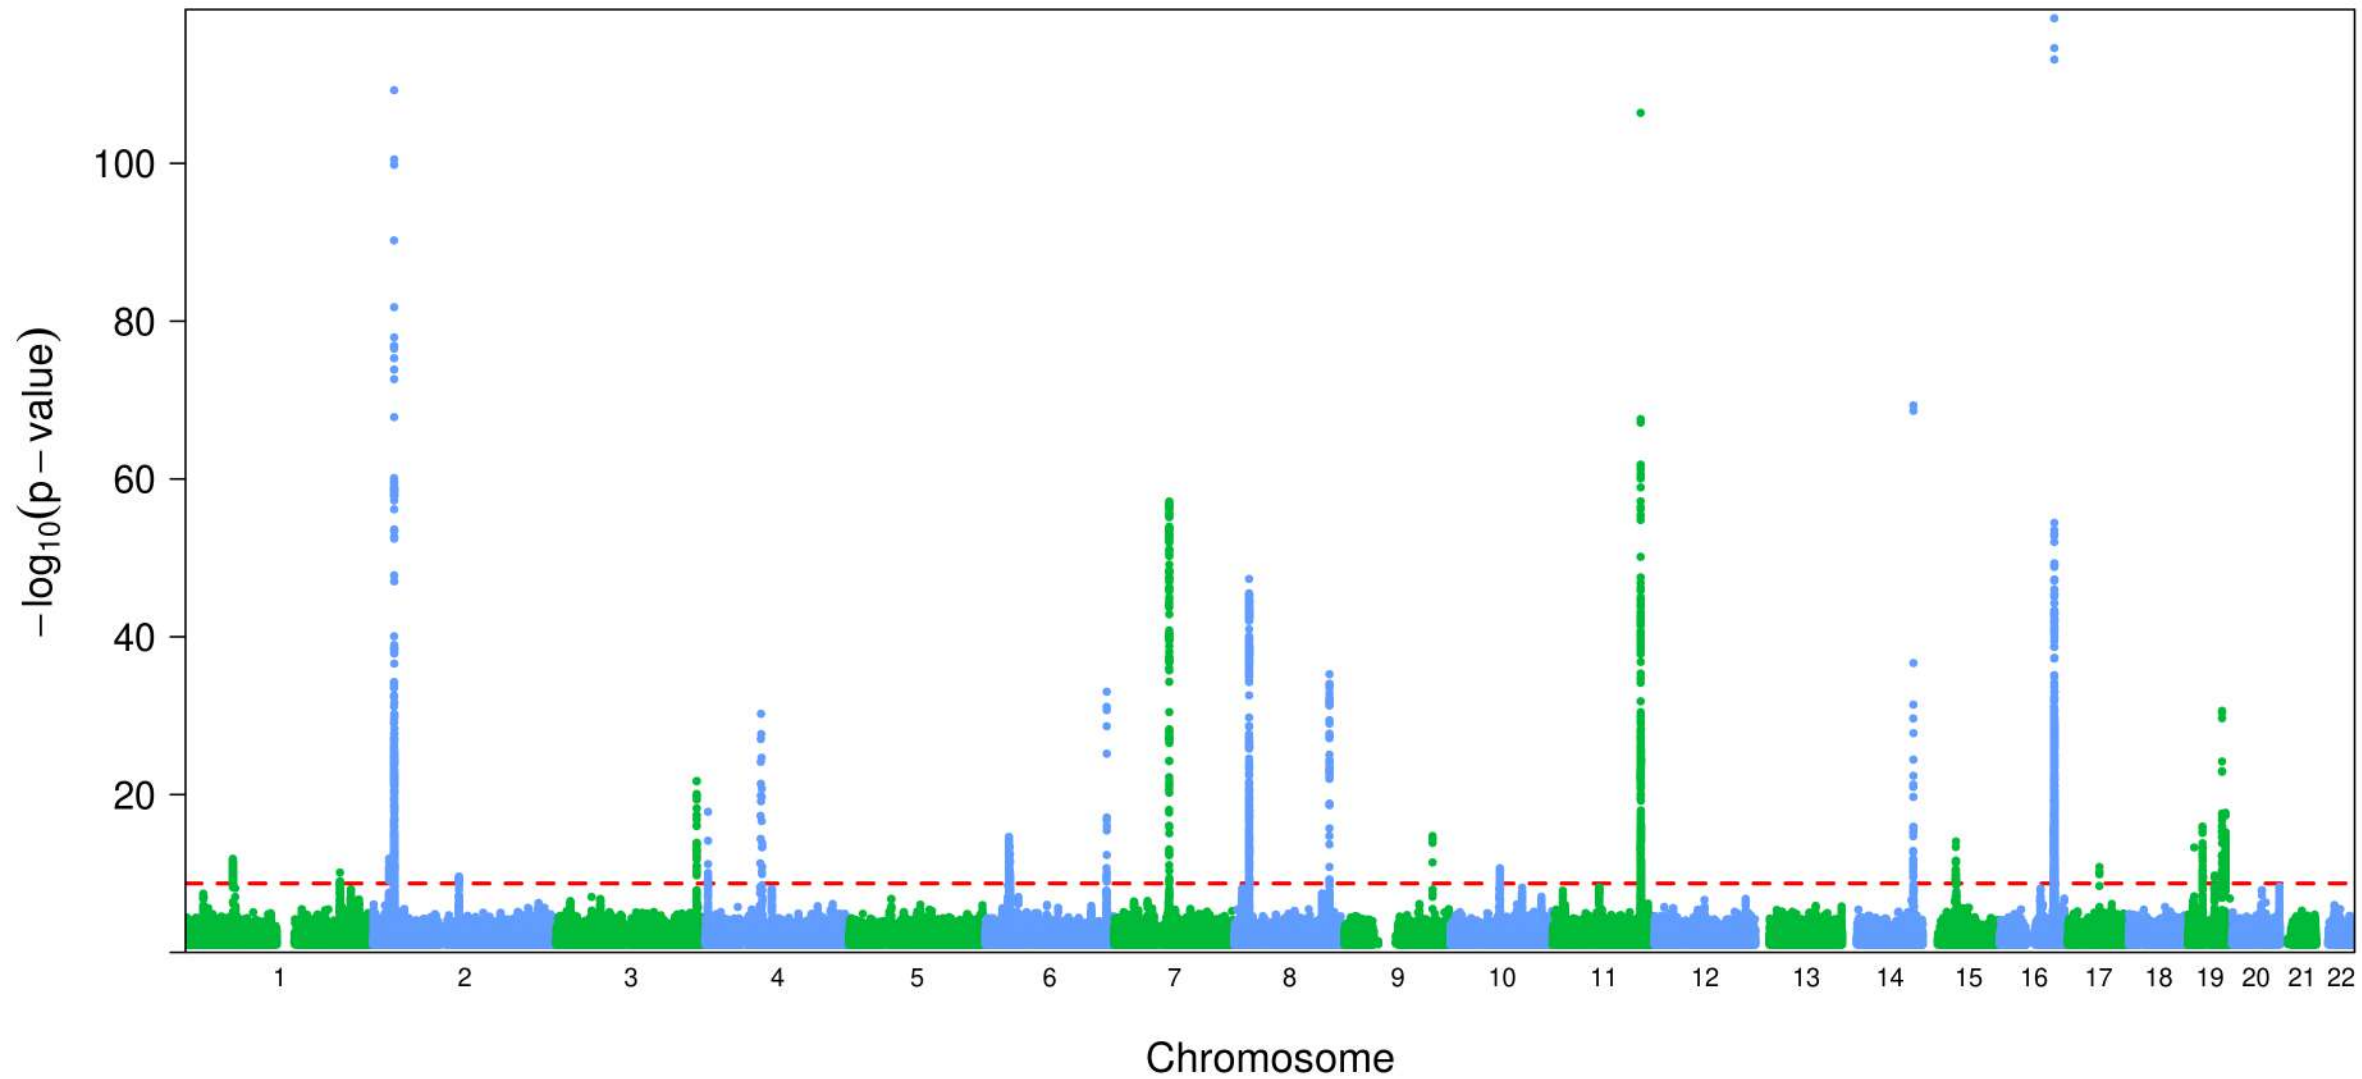

# HDL-C

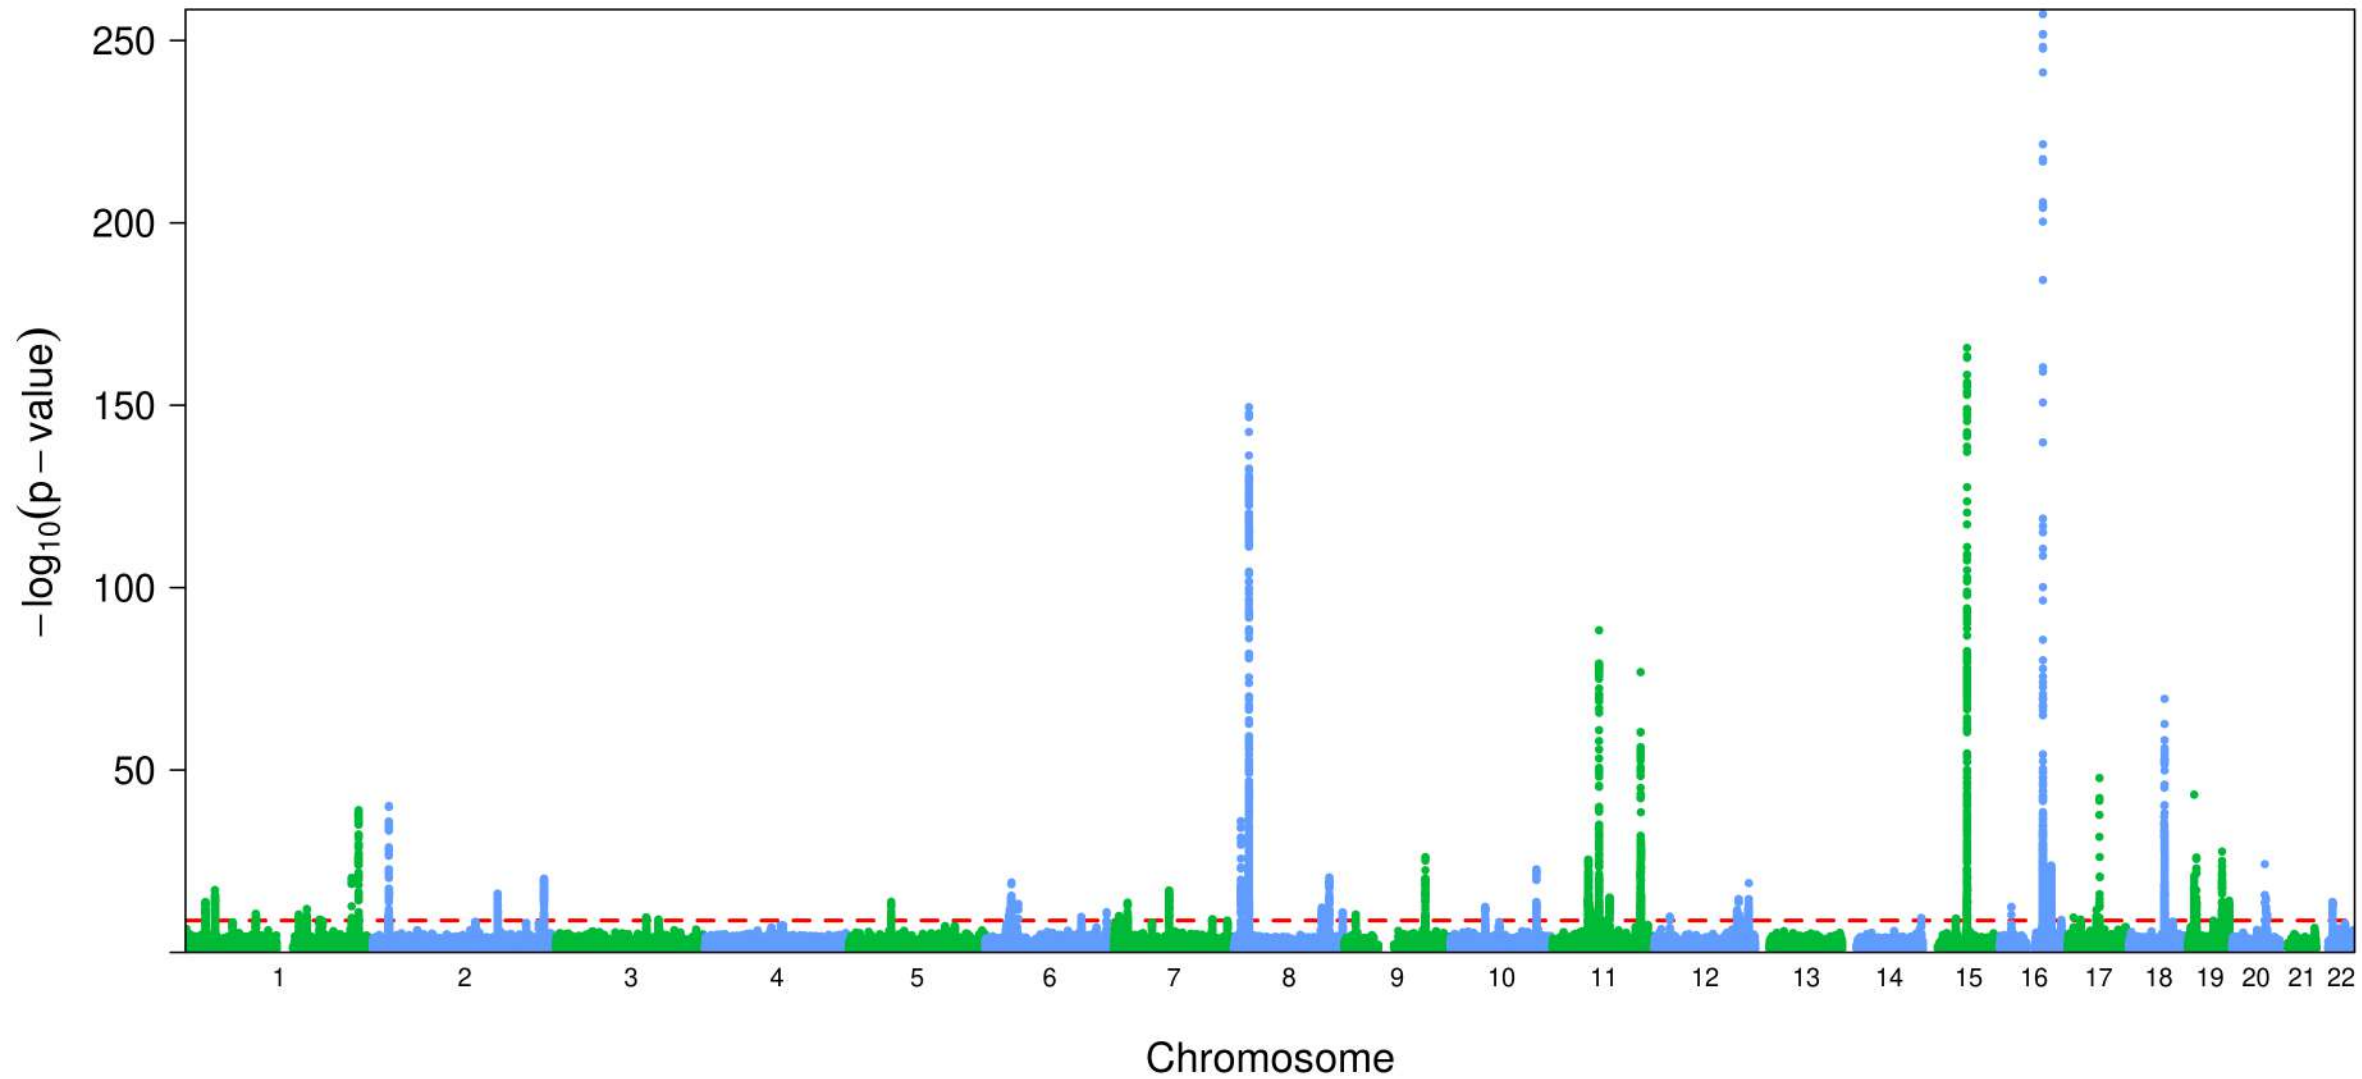

# HDL-D

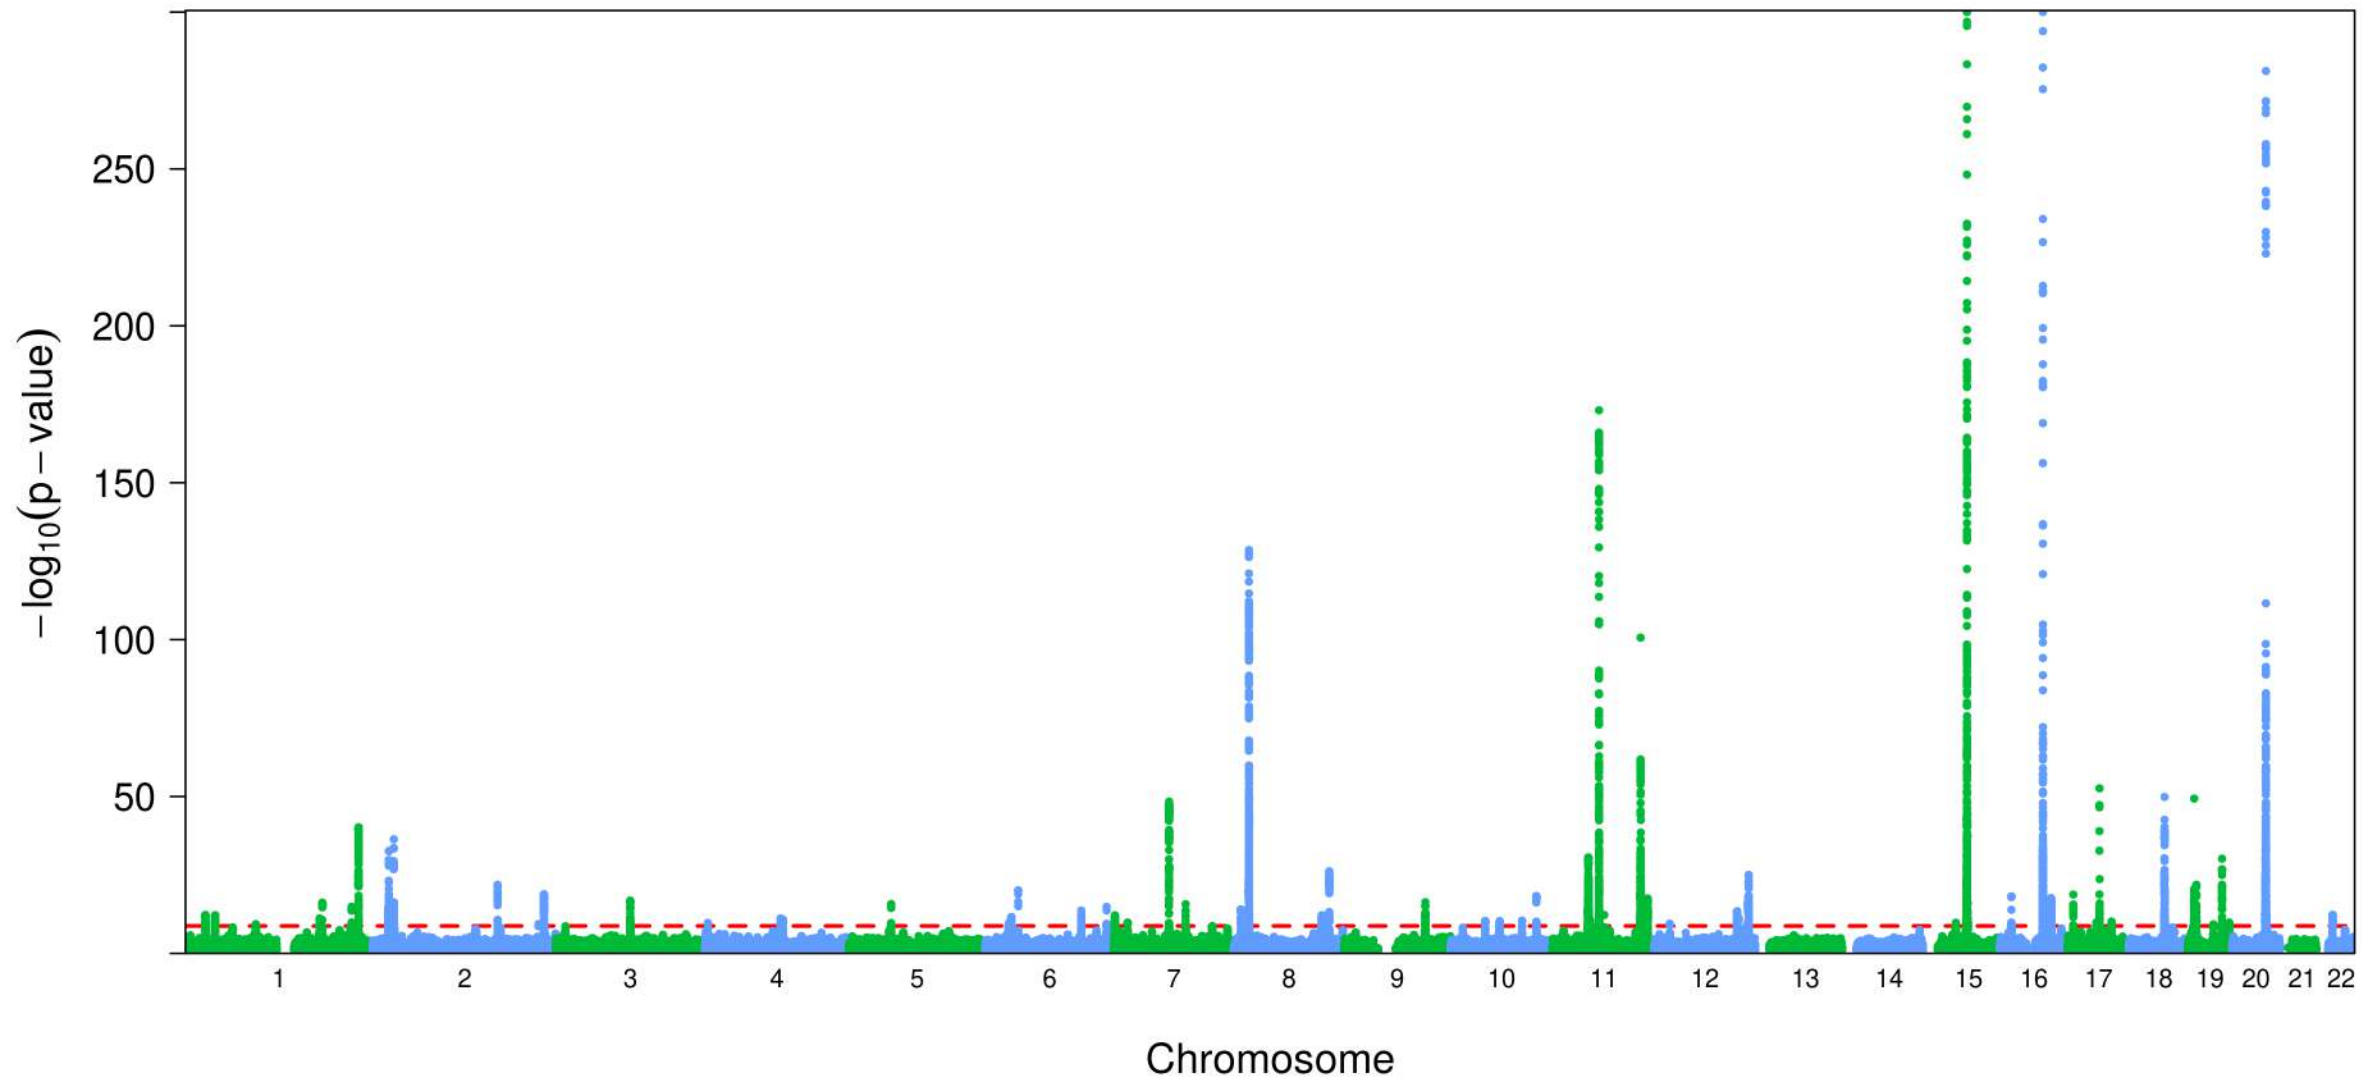

# HDL-TG

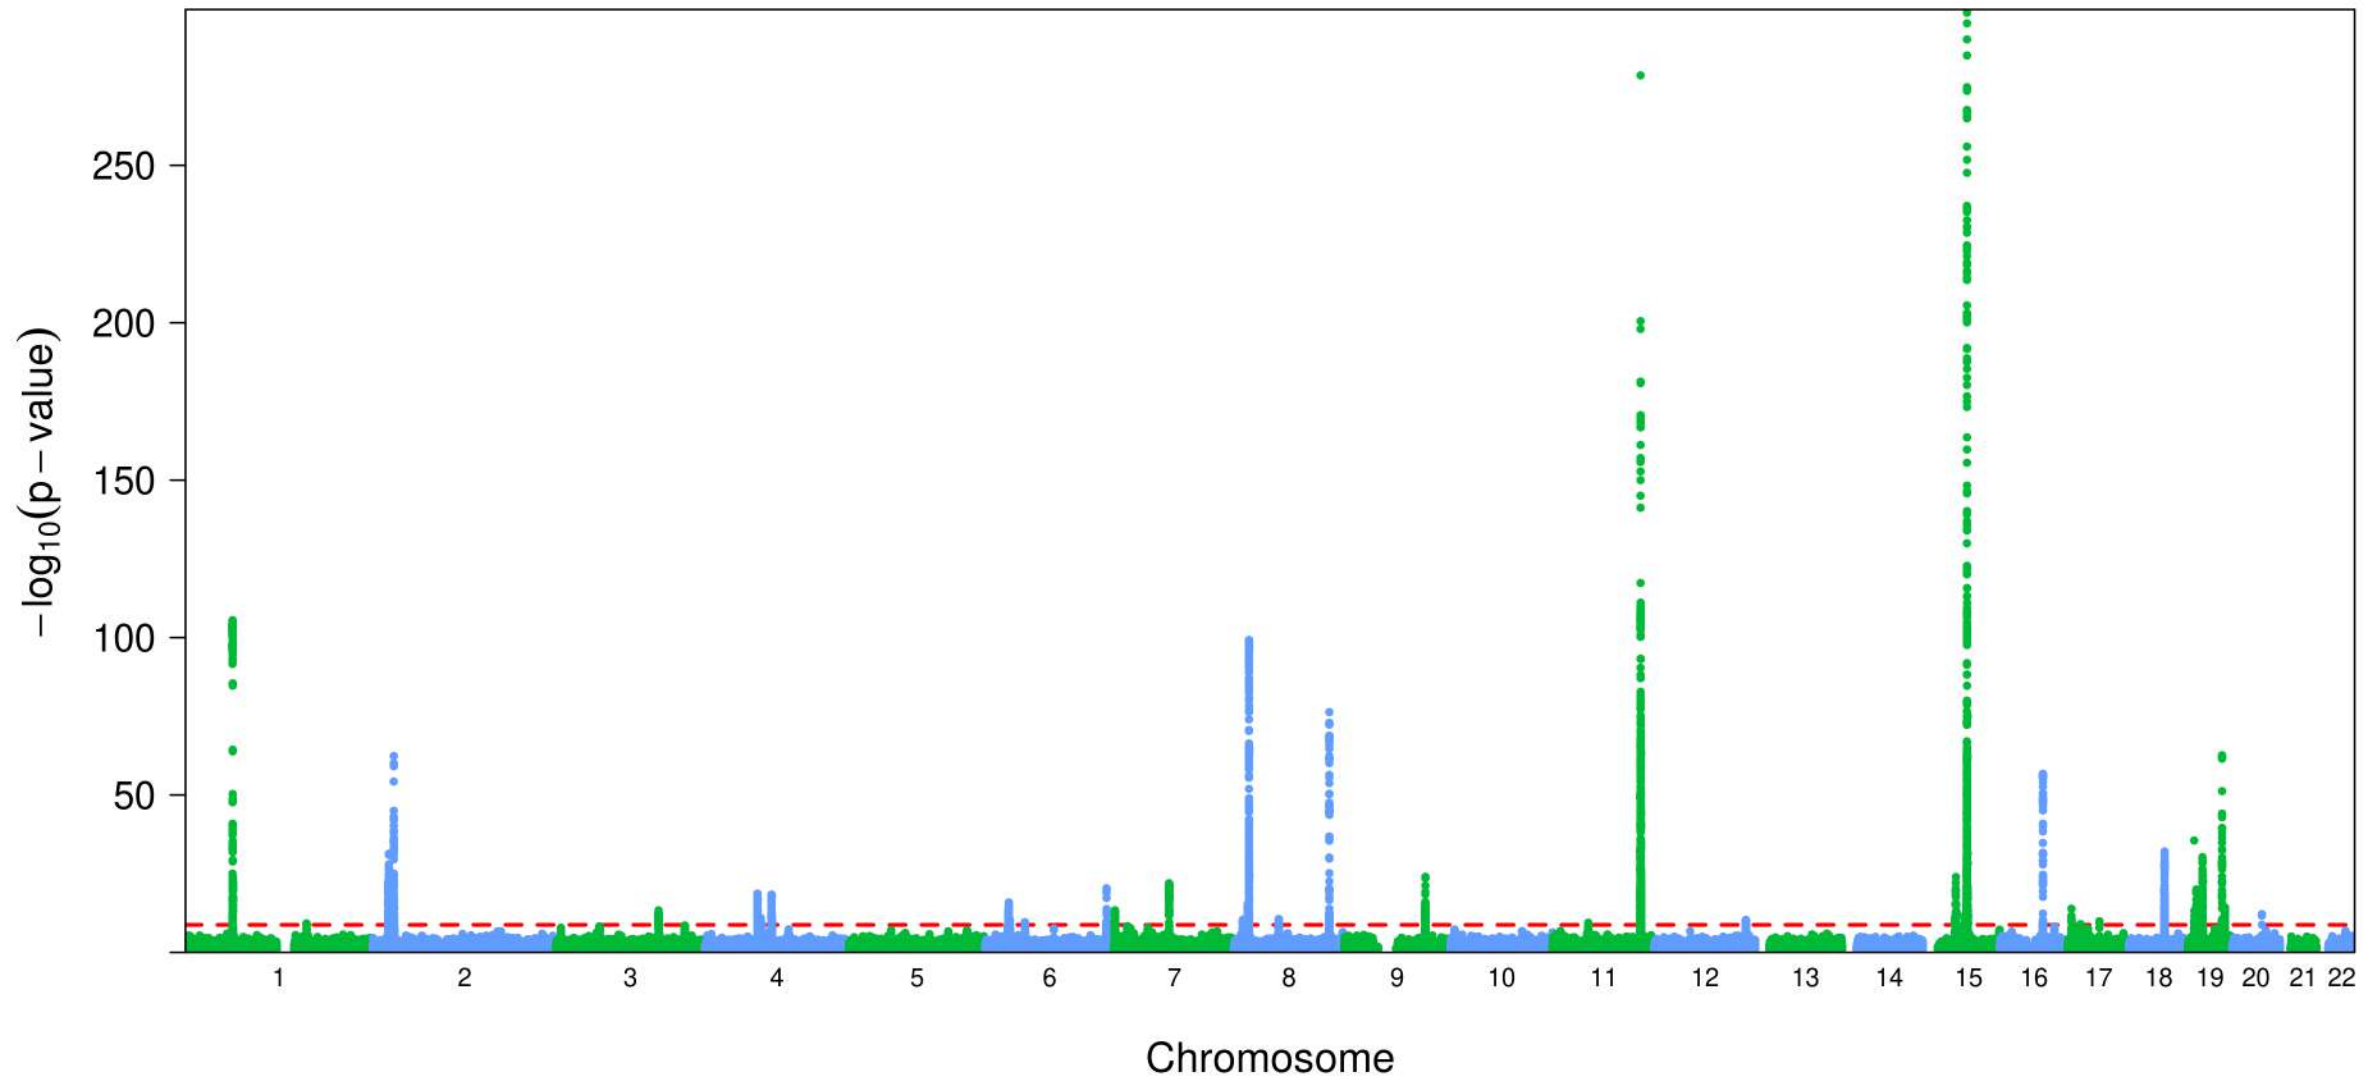

# HDL2-C

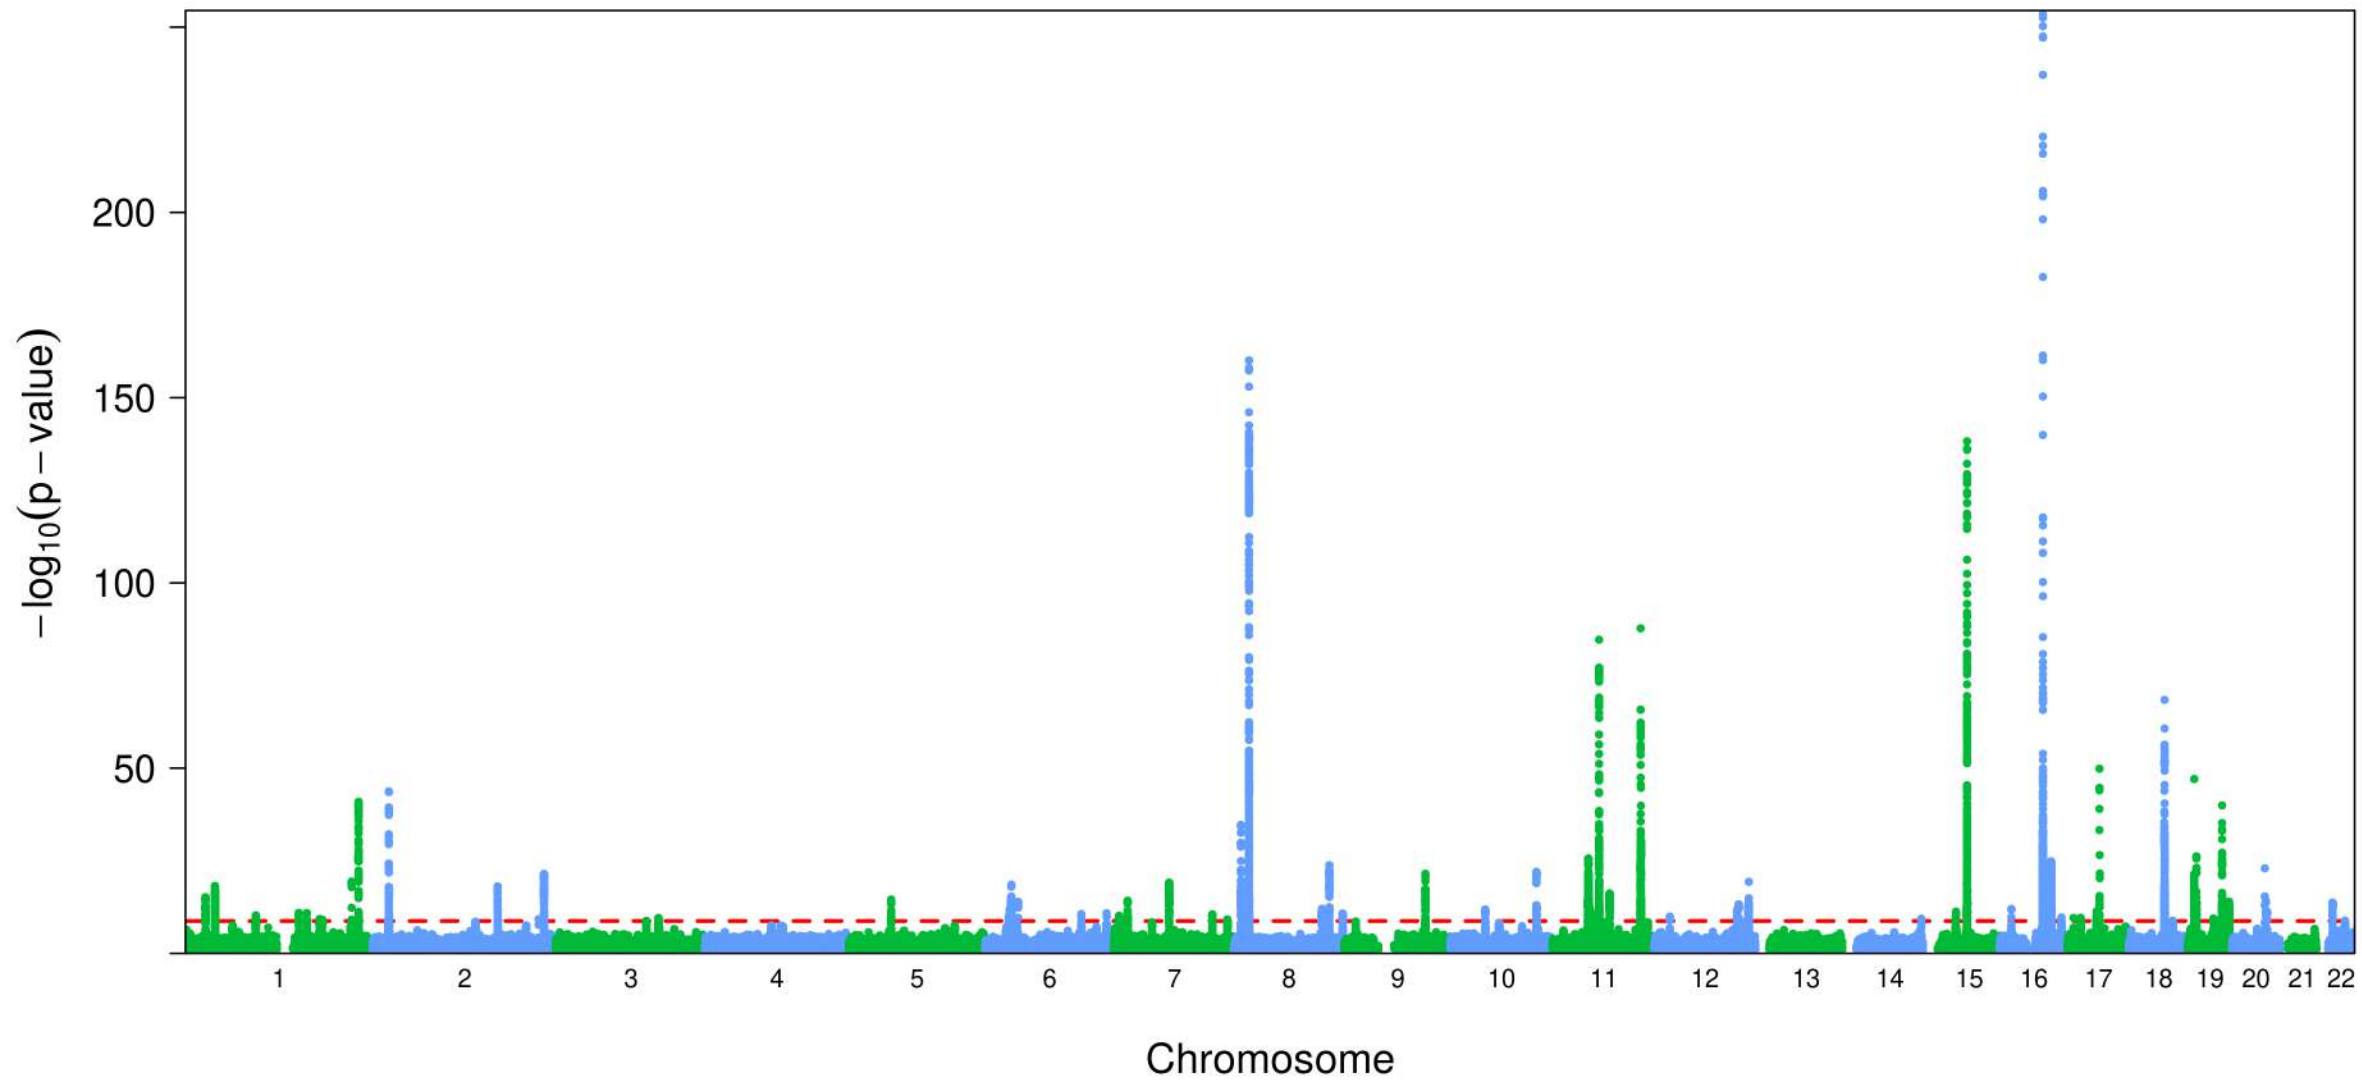



# HDL3-C

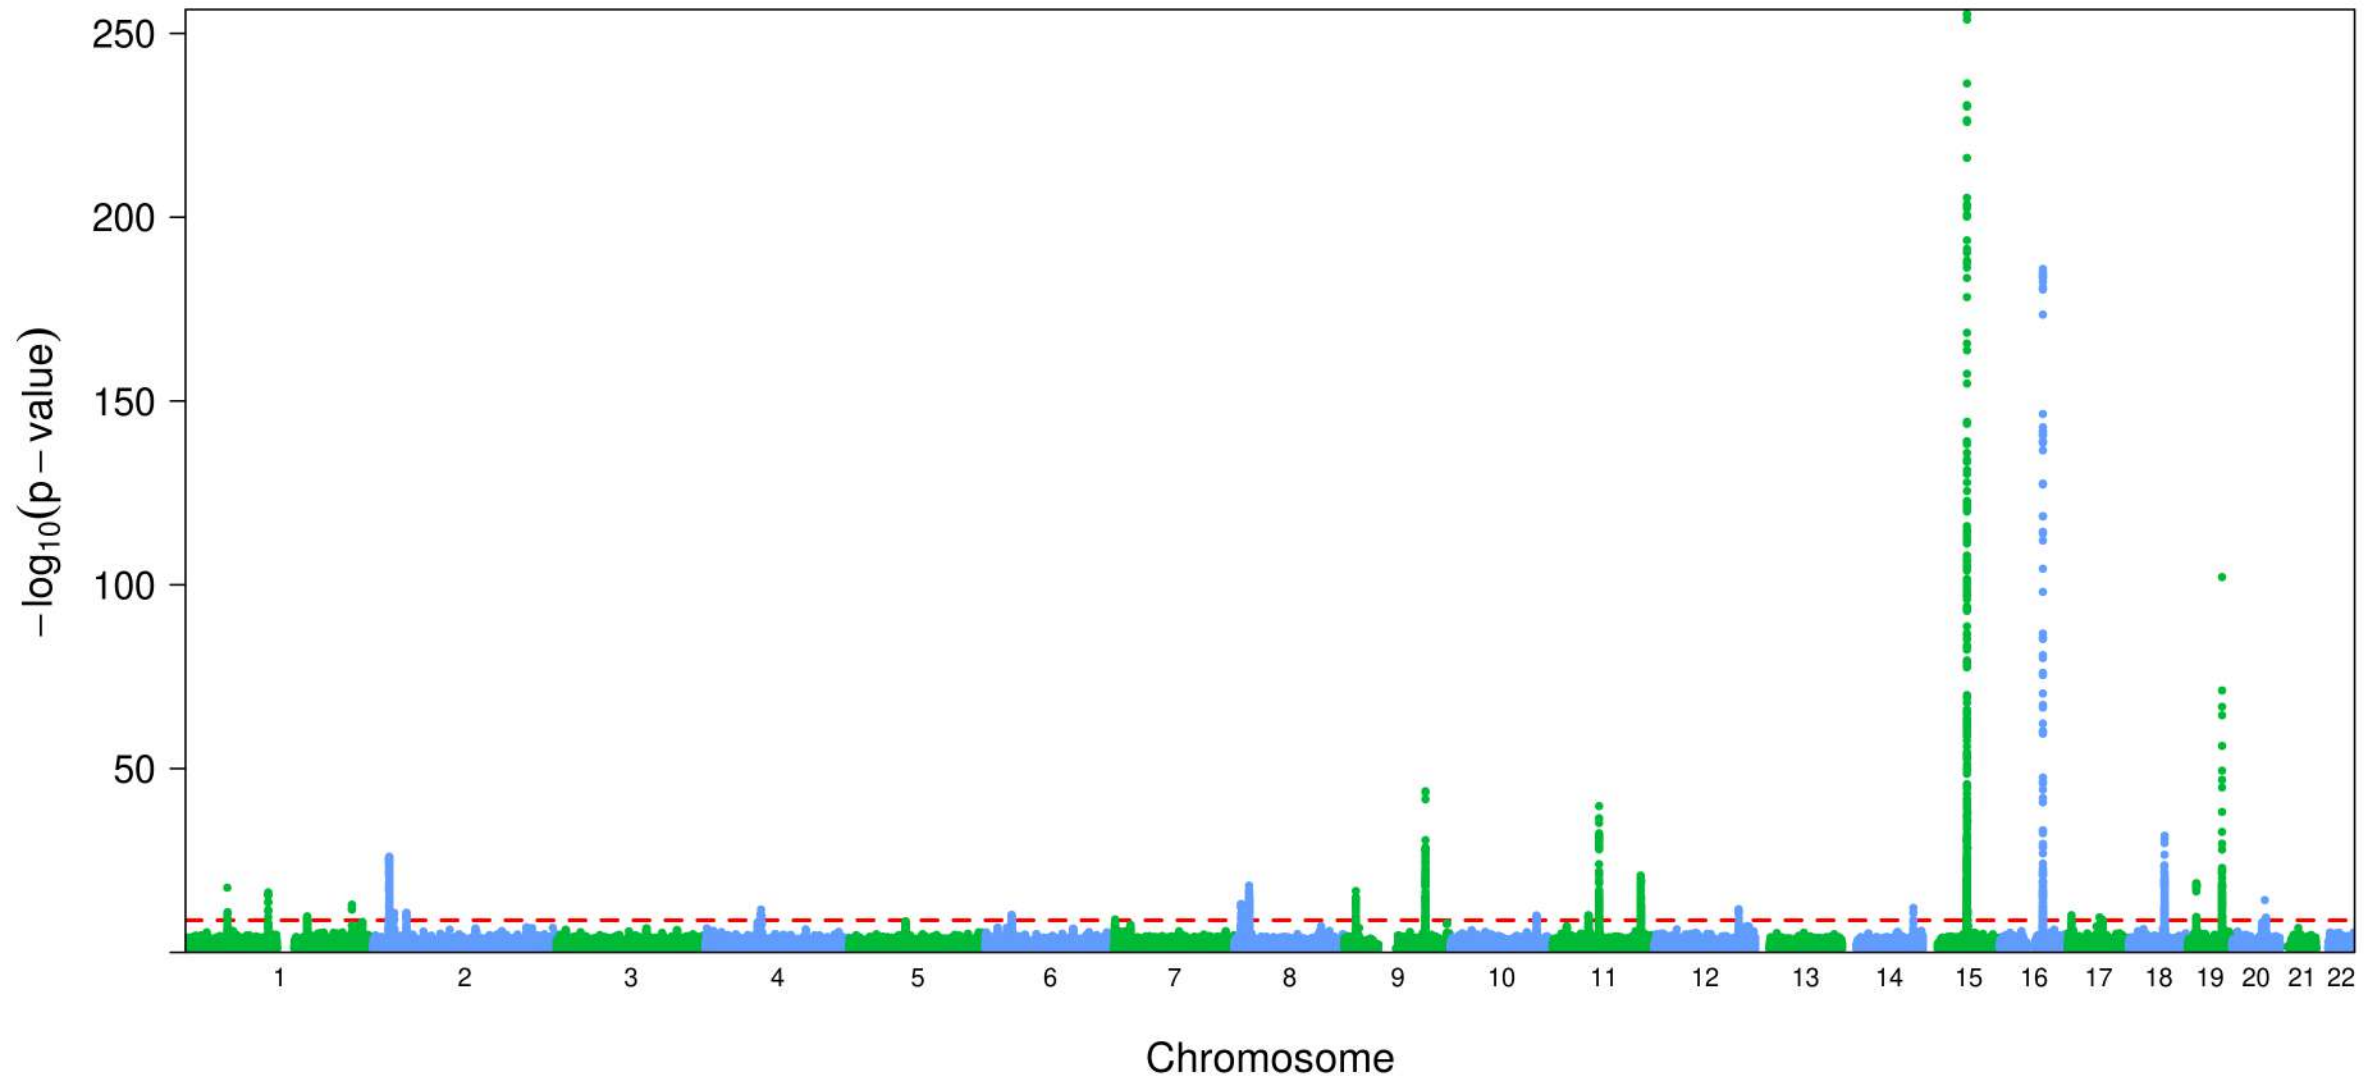

# His

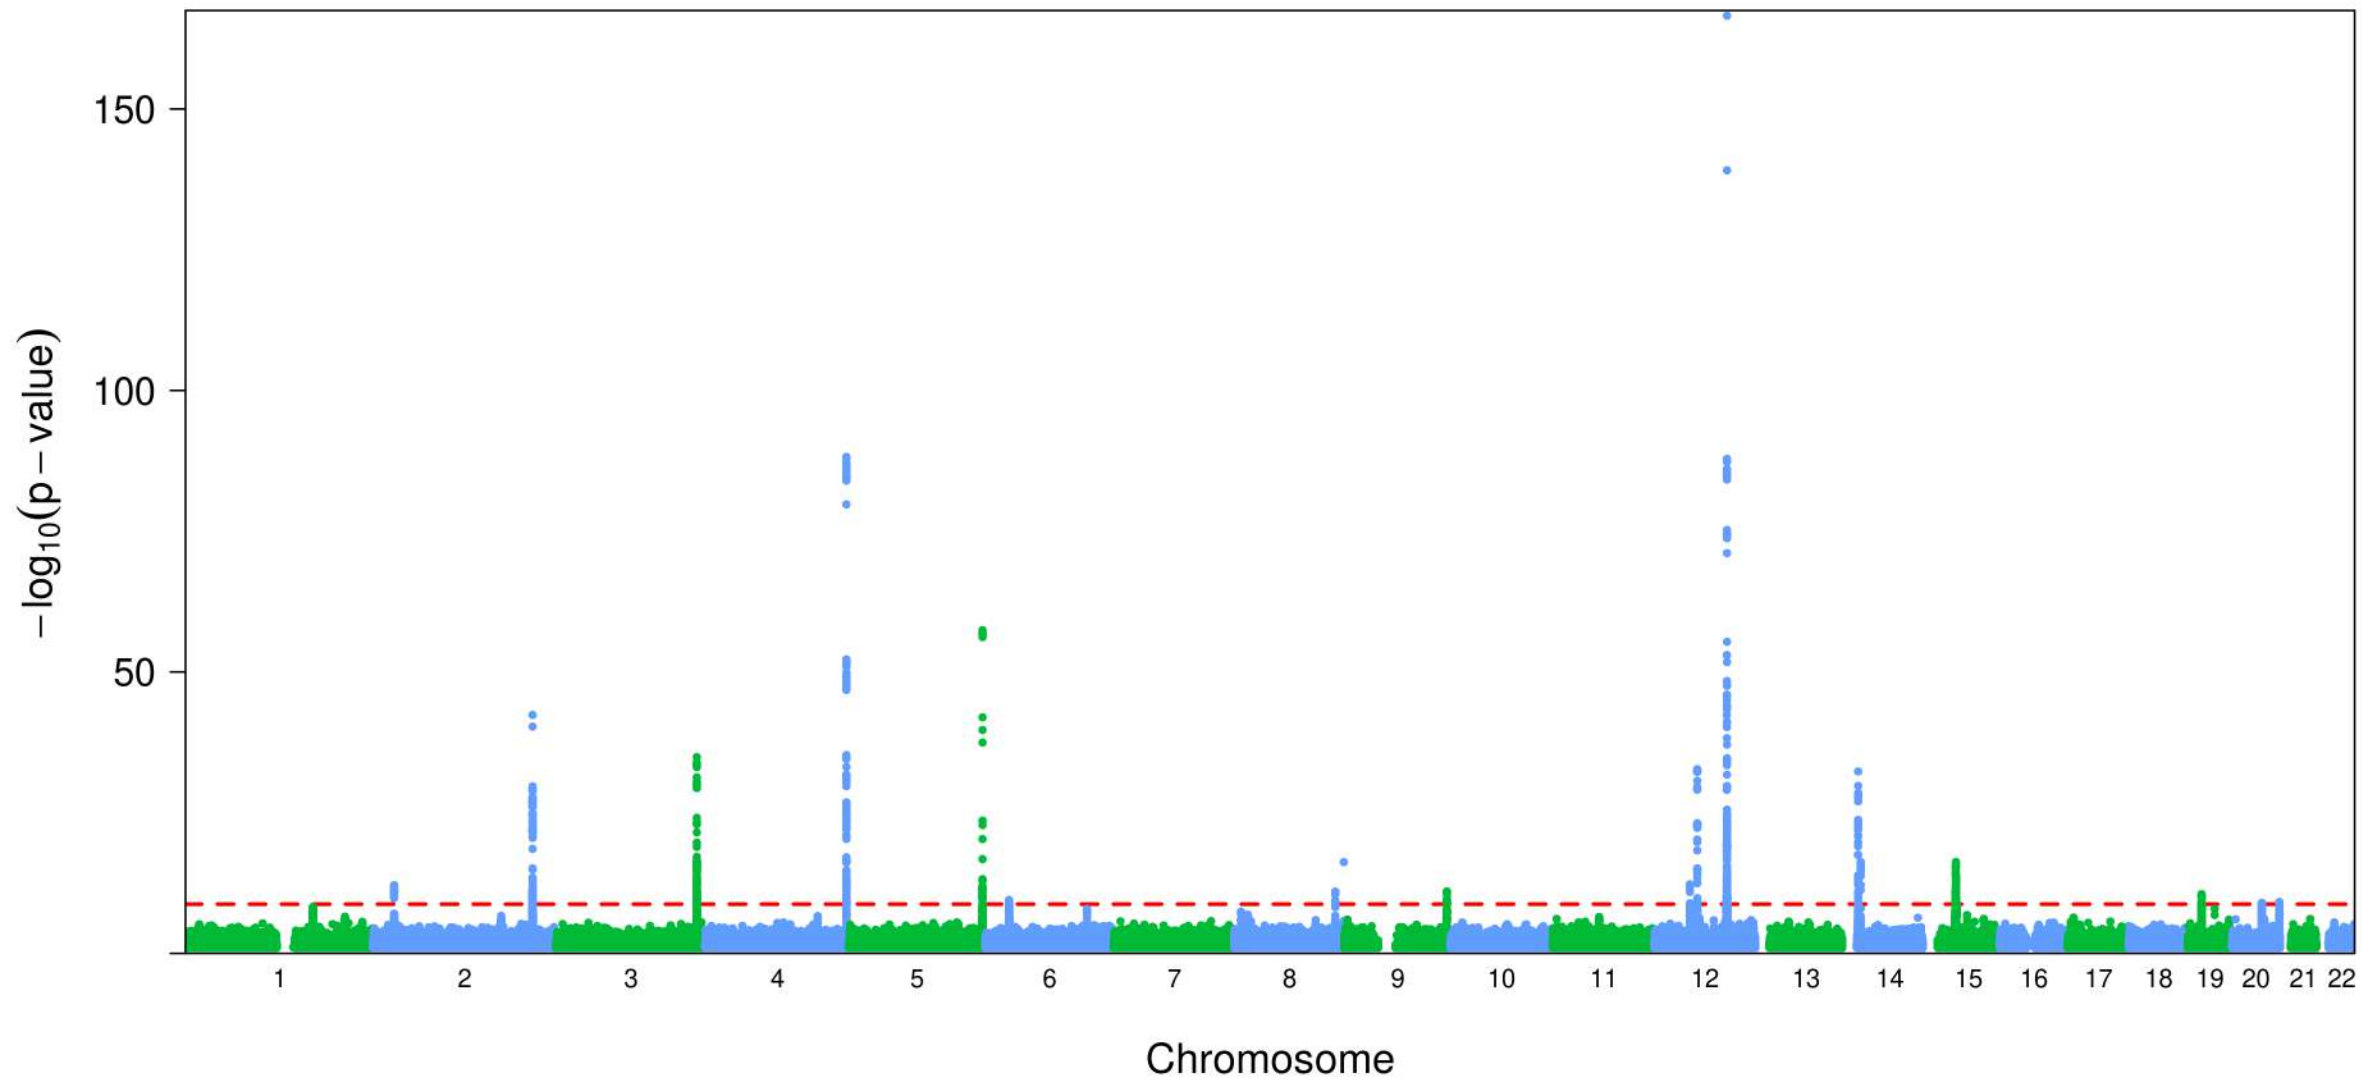

## IDL-C

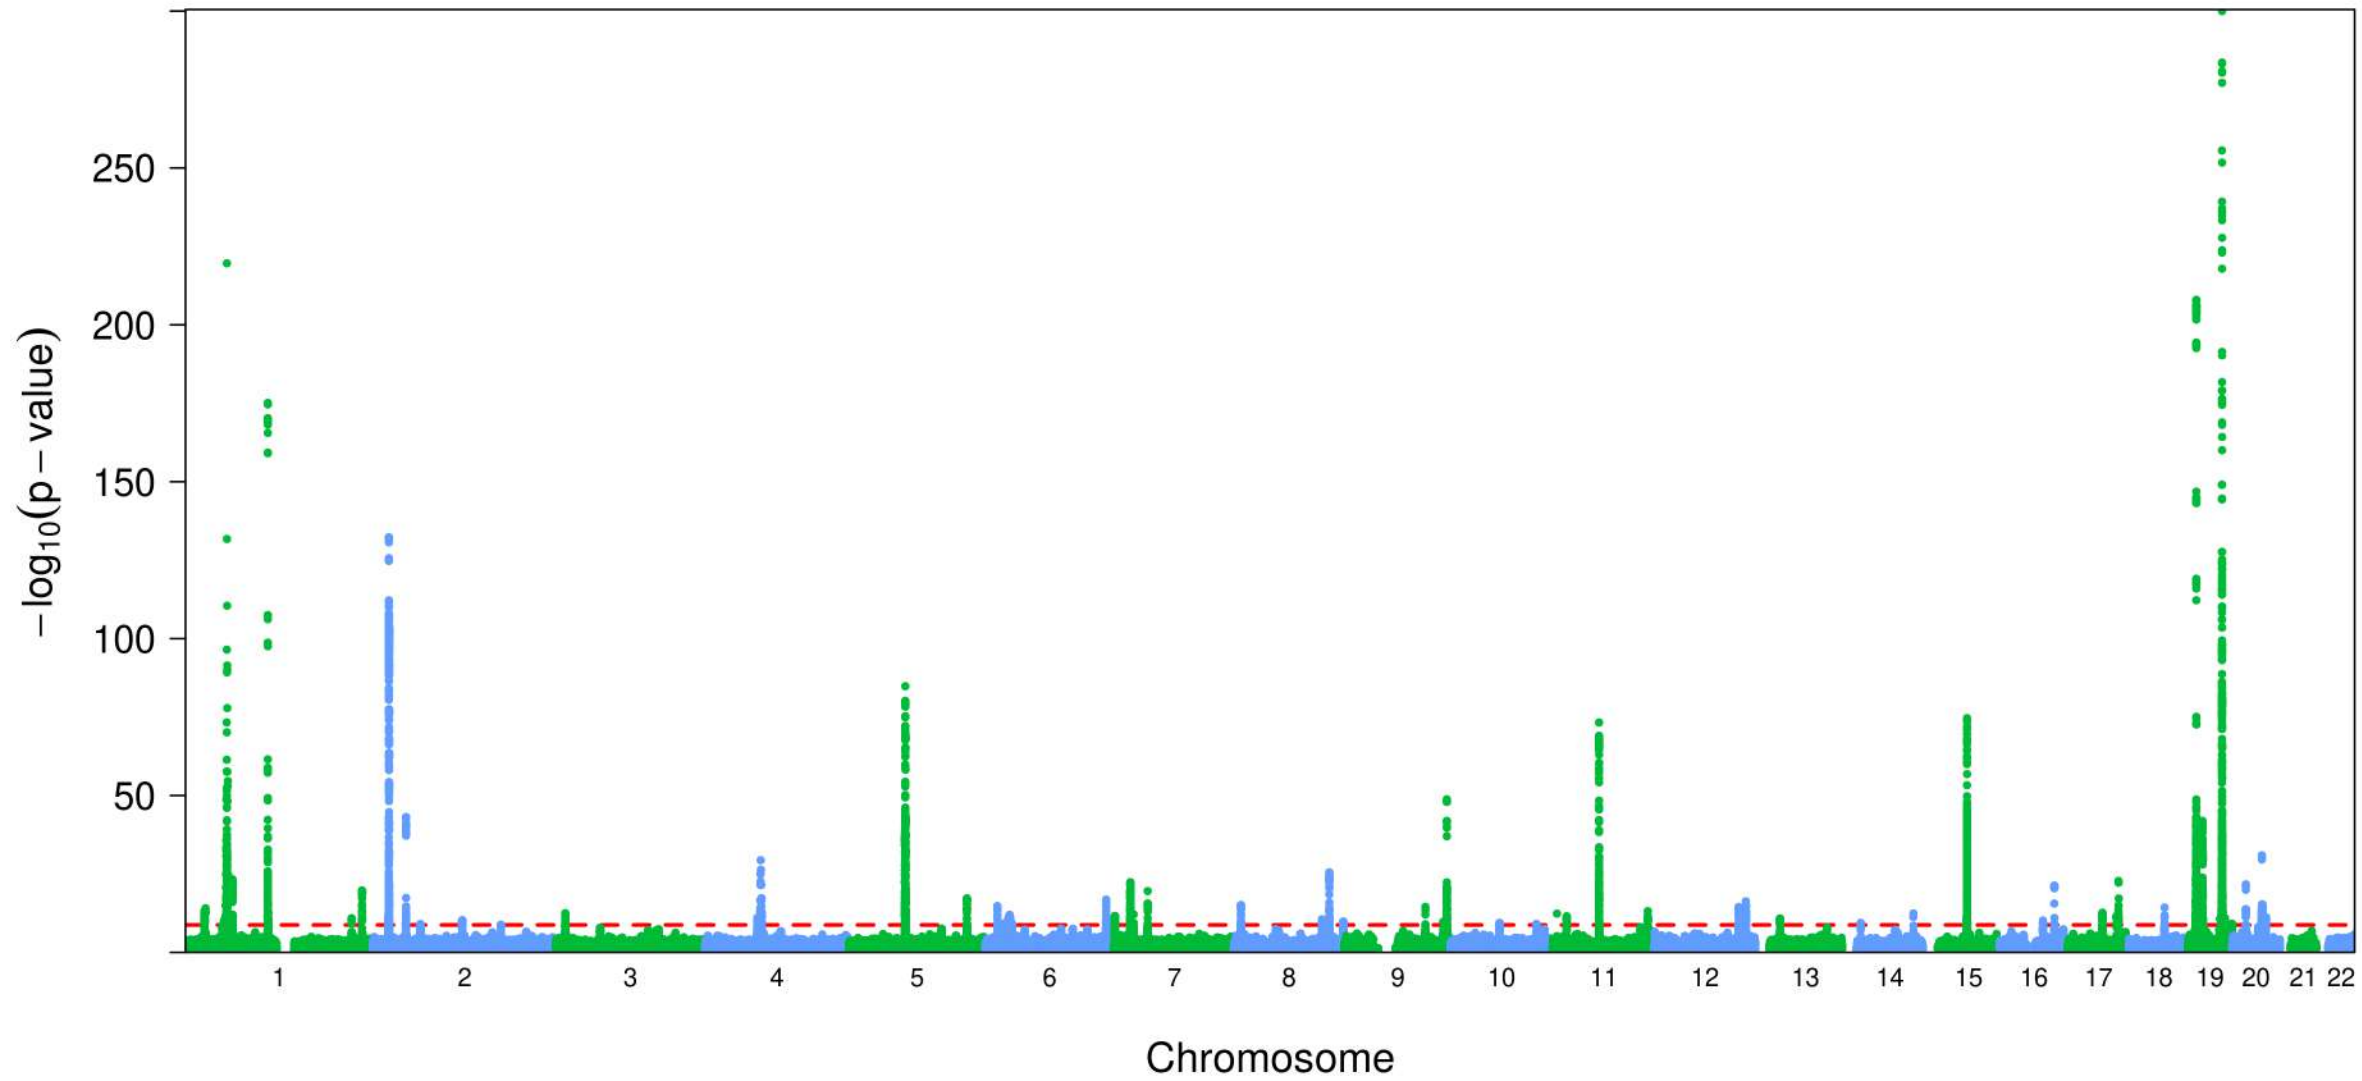



## IDL-CE

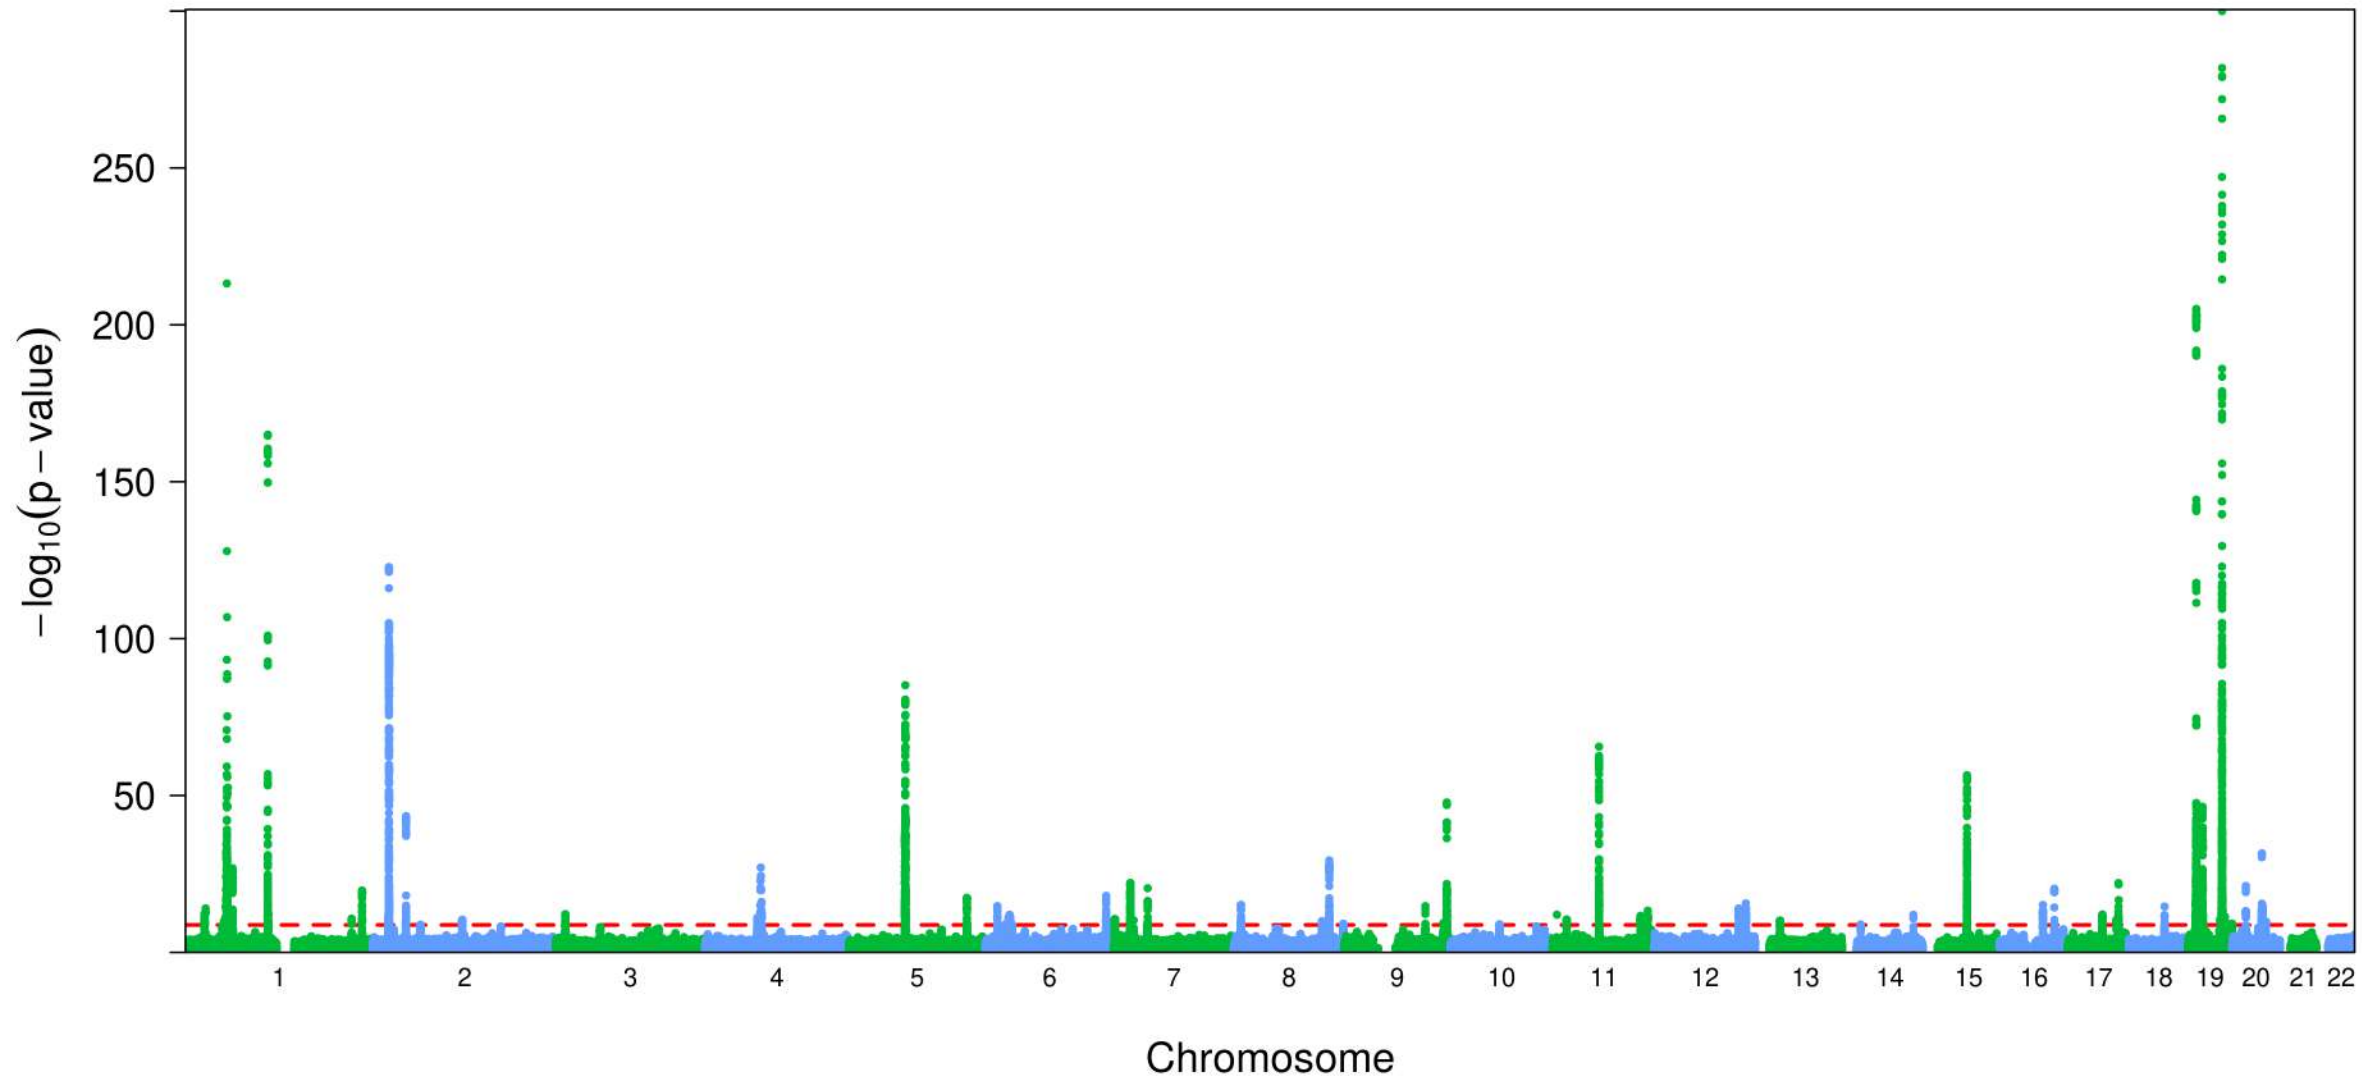

## IDL-CE\_percent

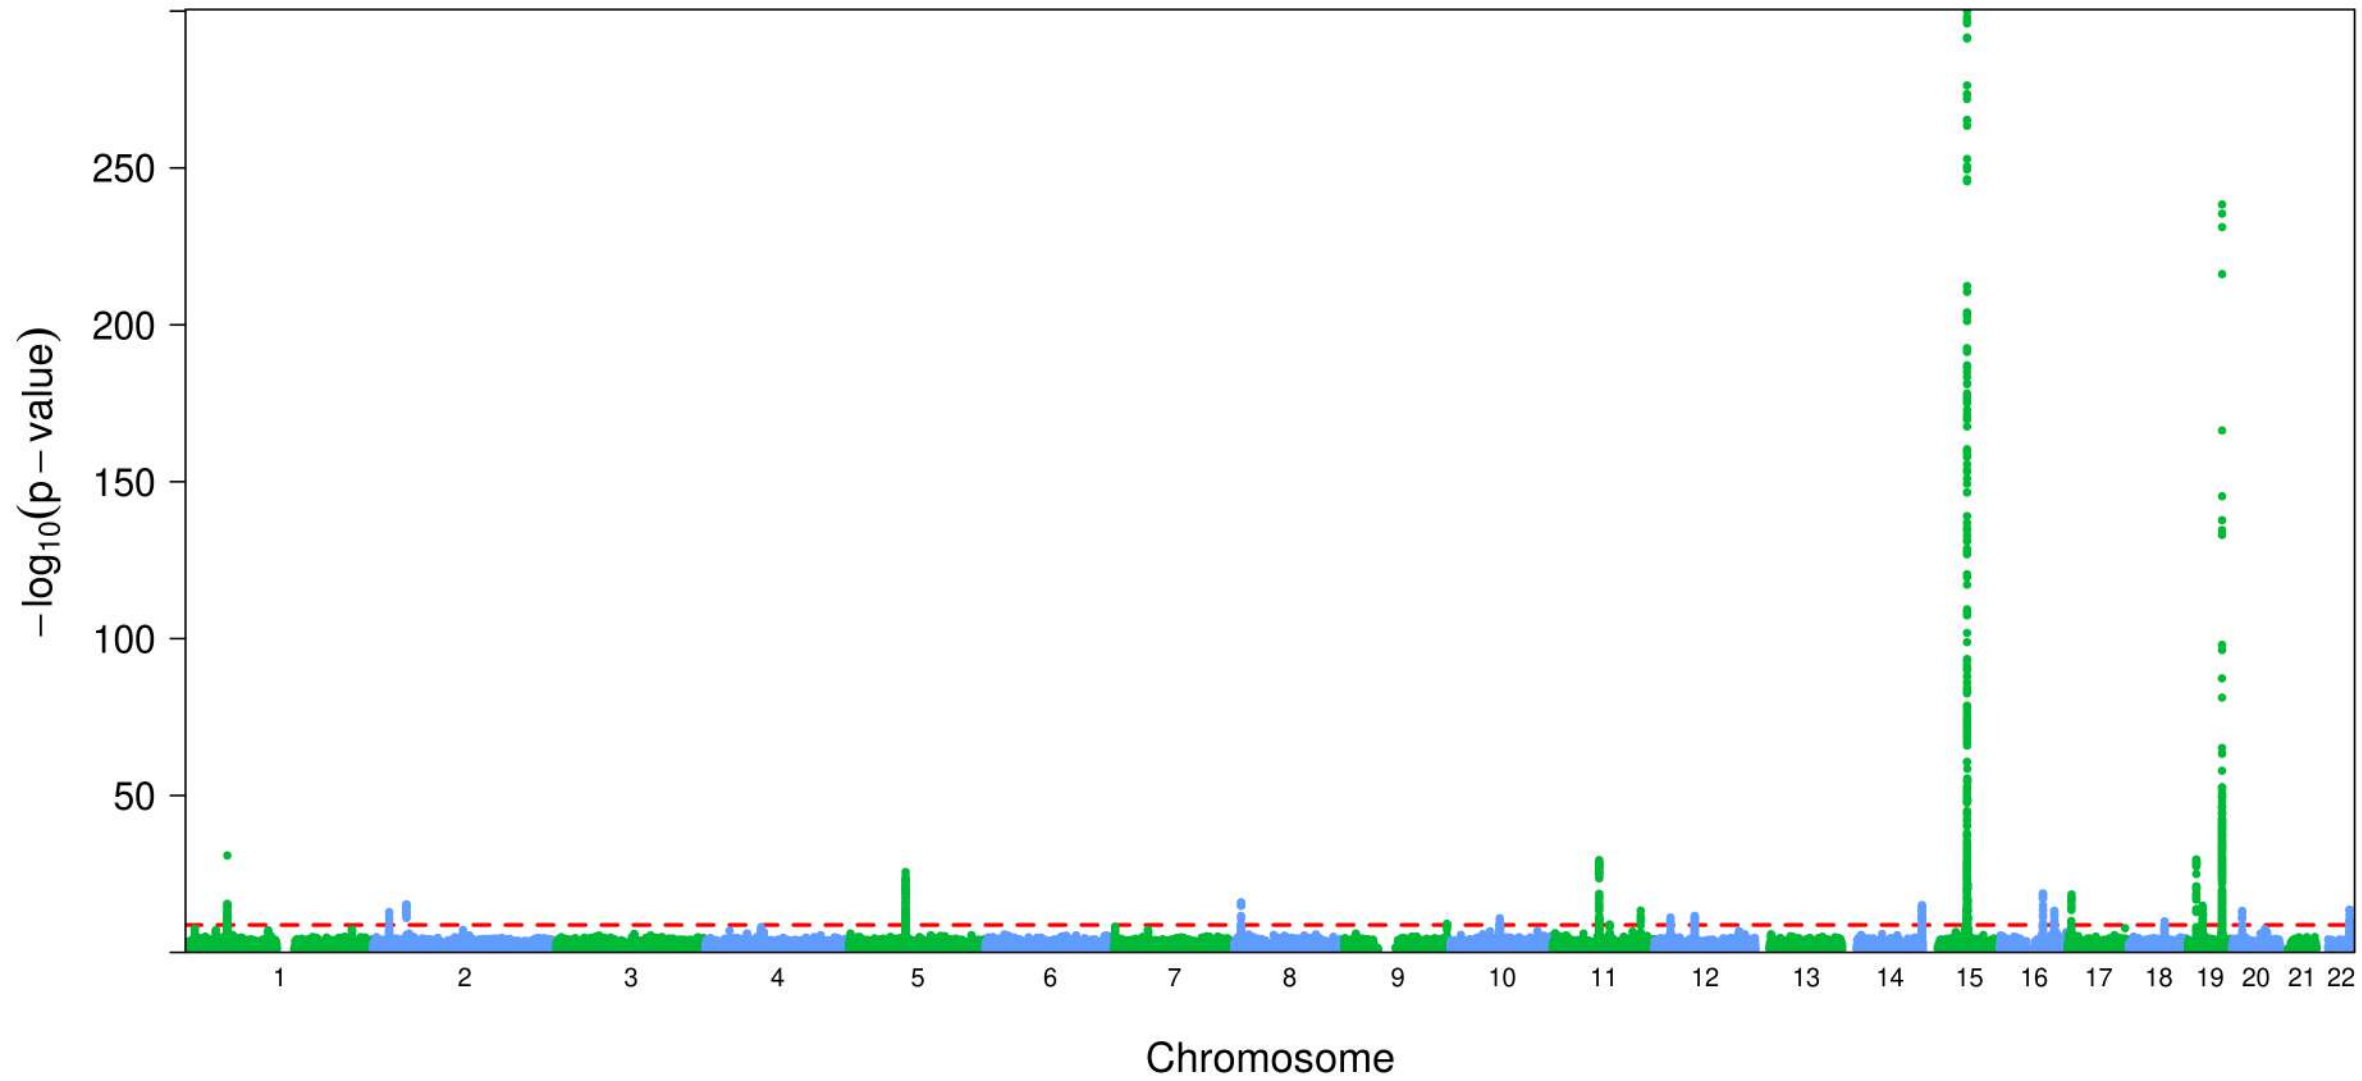

# IDL-FC

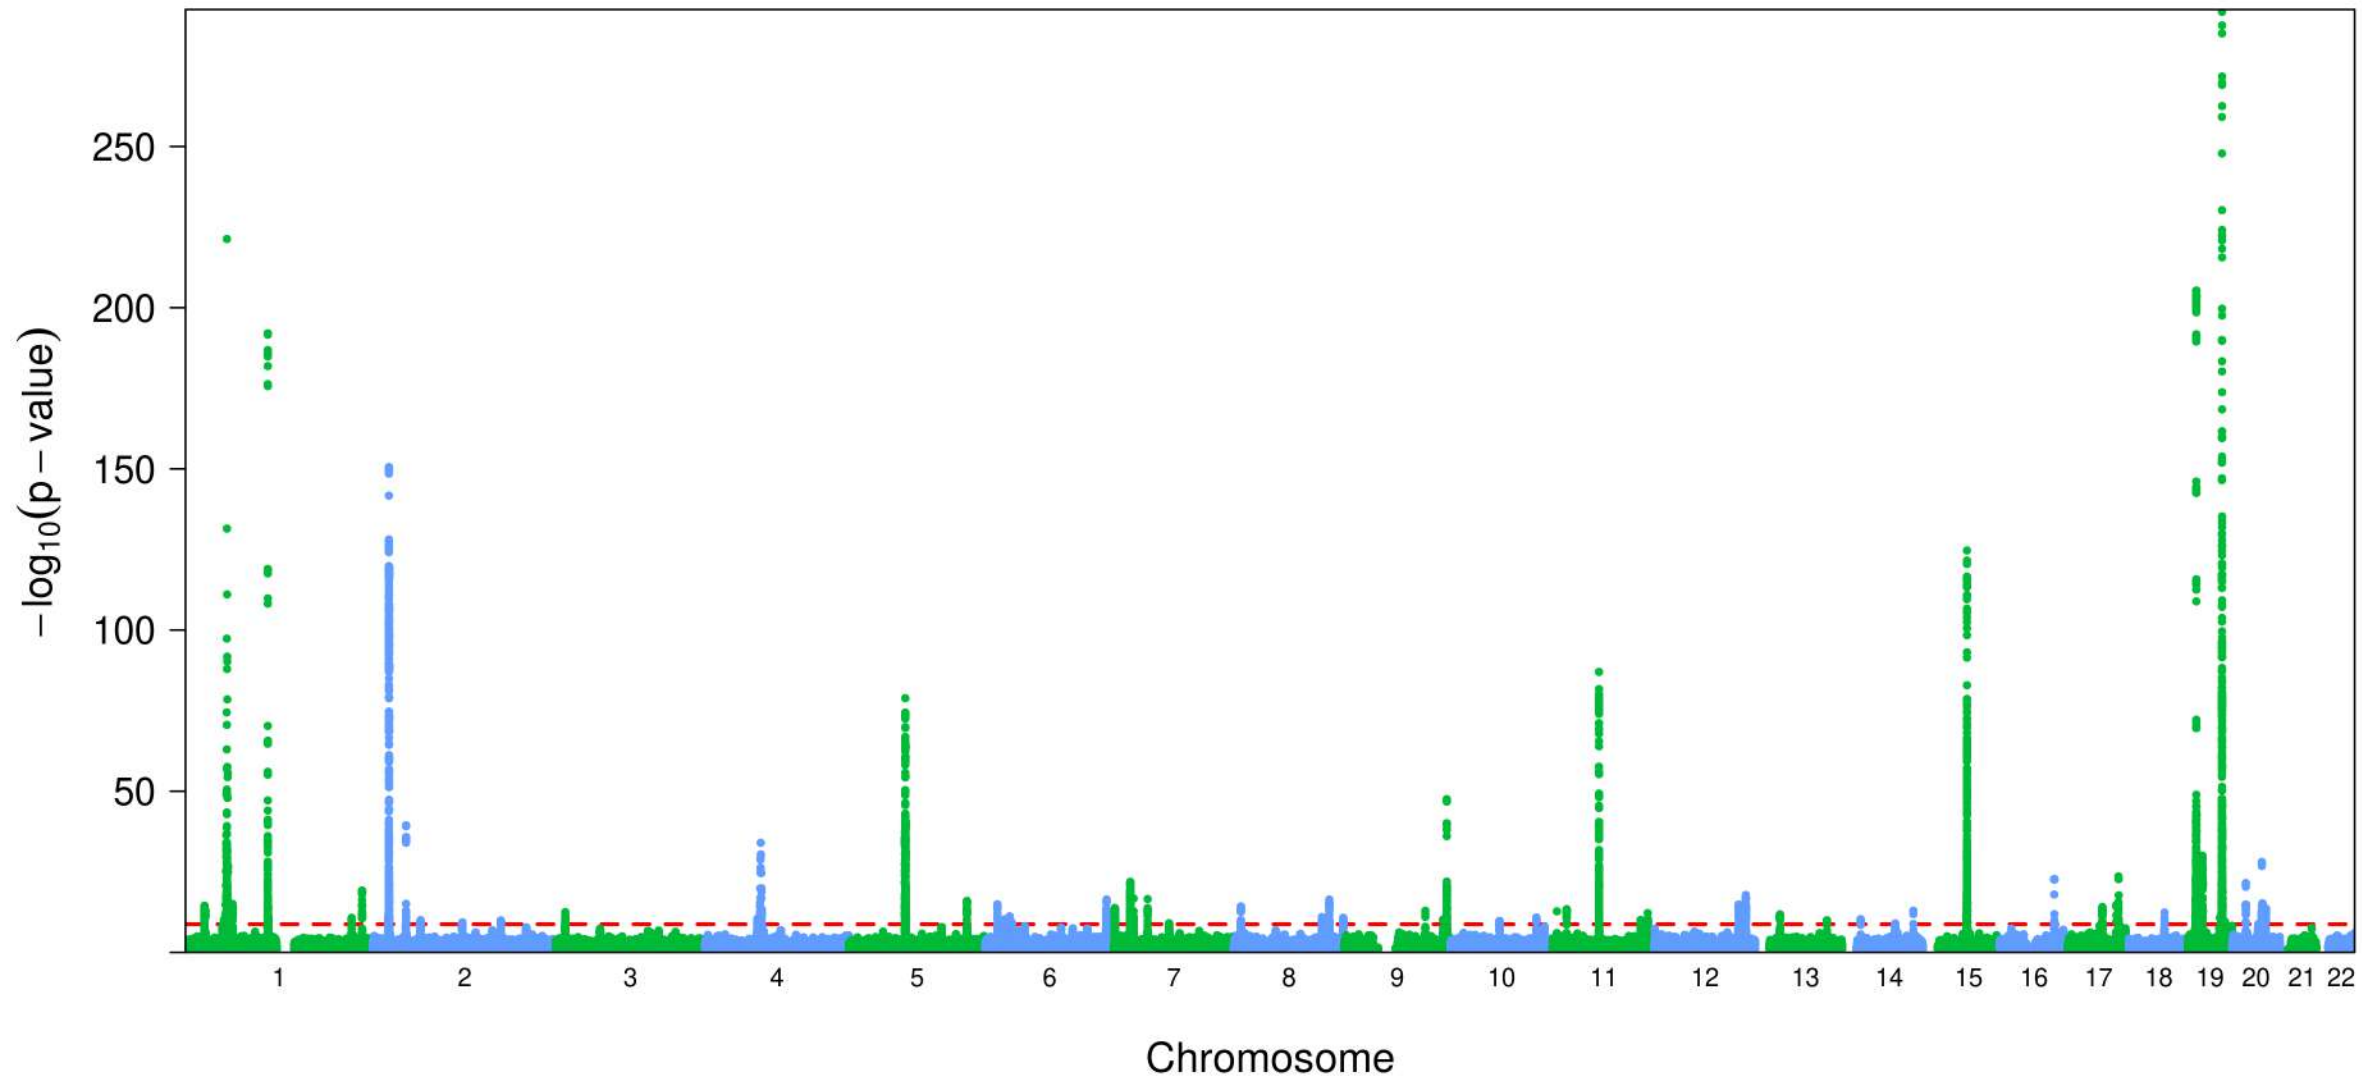

## IDL-FC\_percent

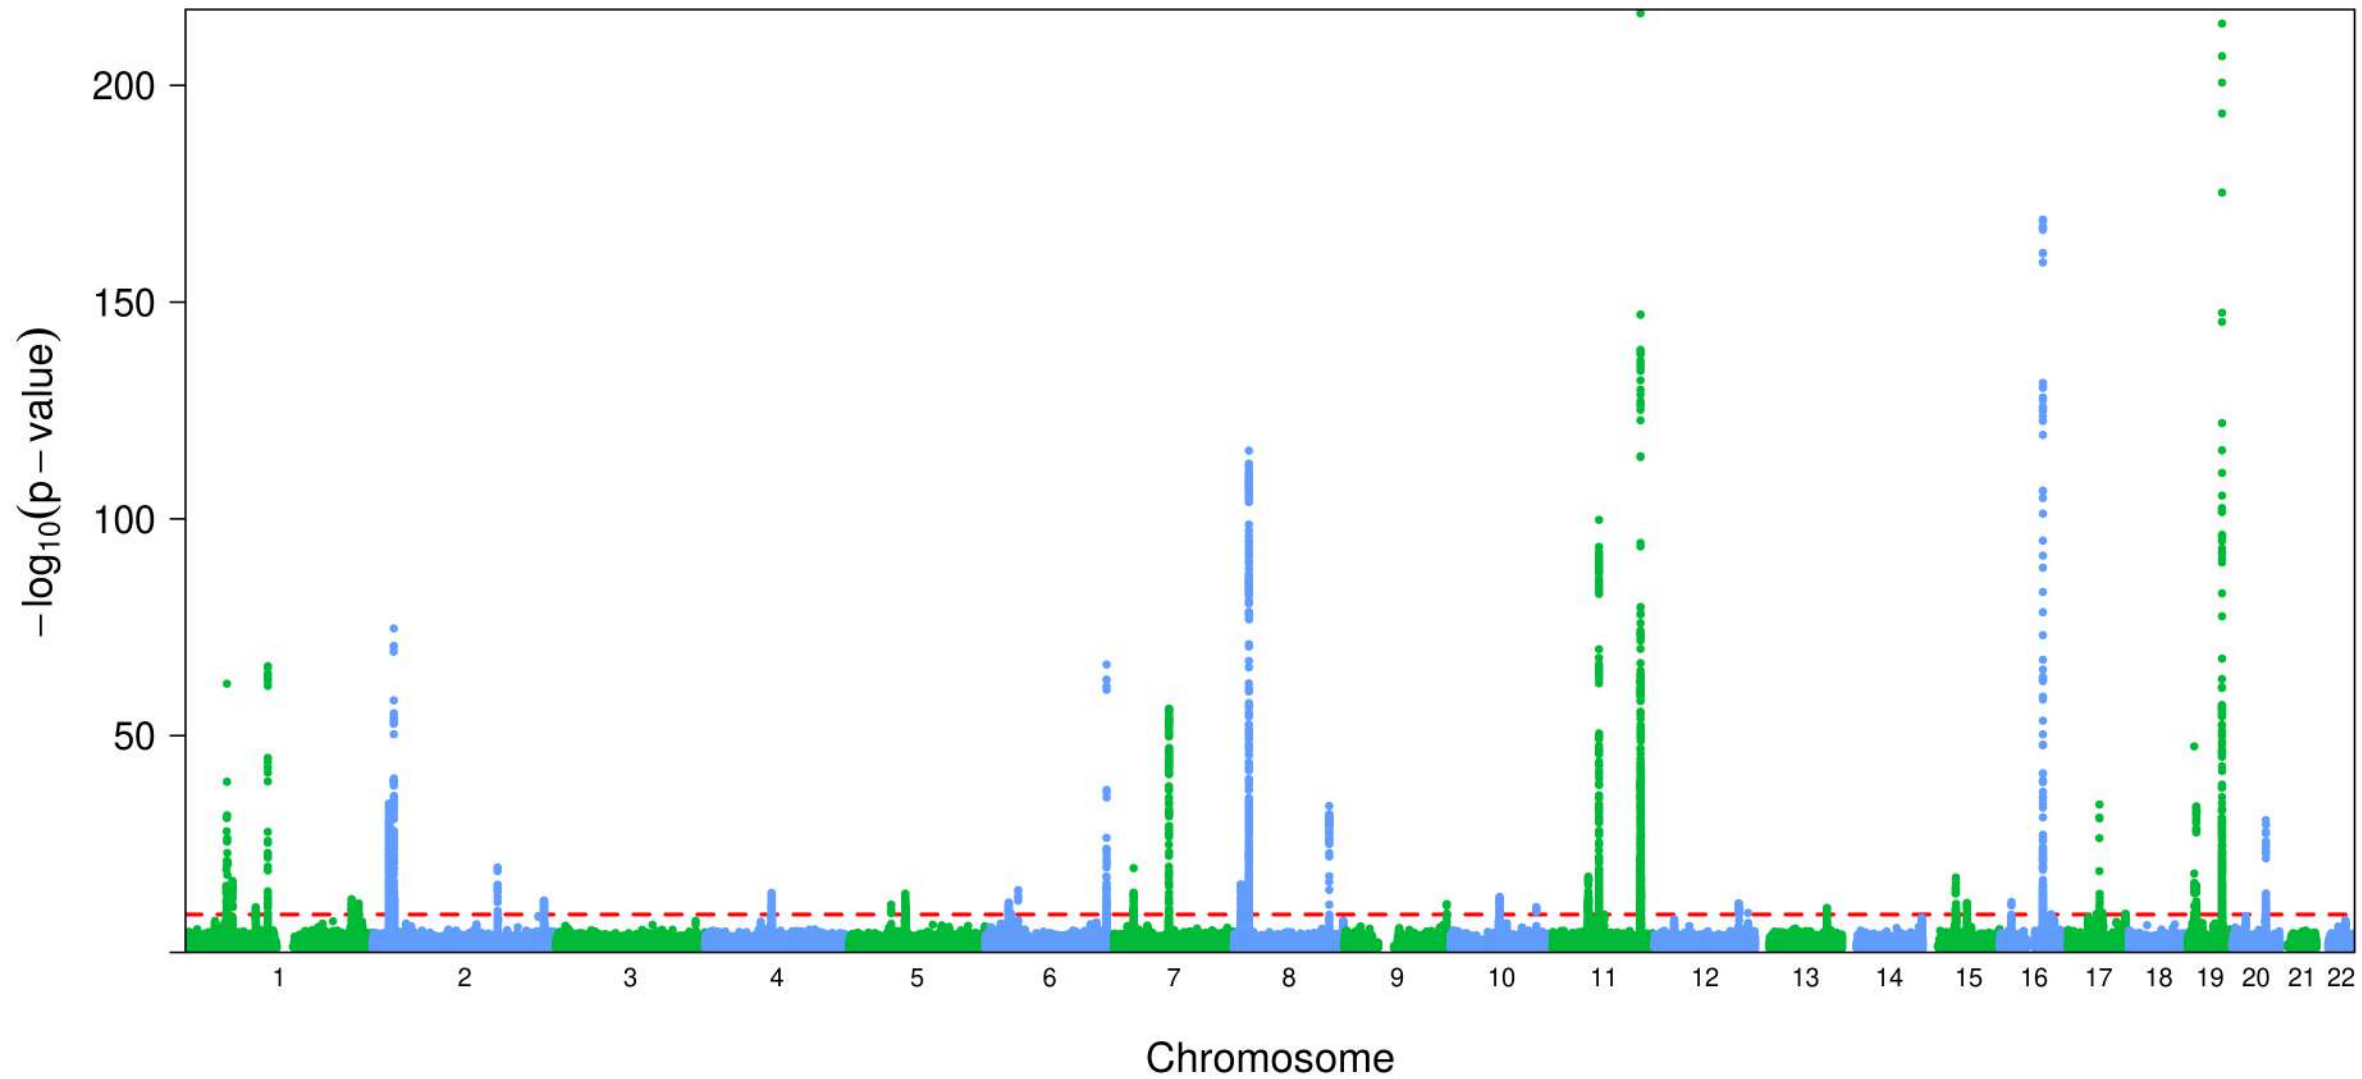



## IDL-L

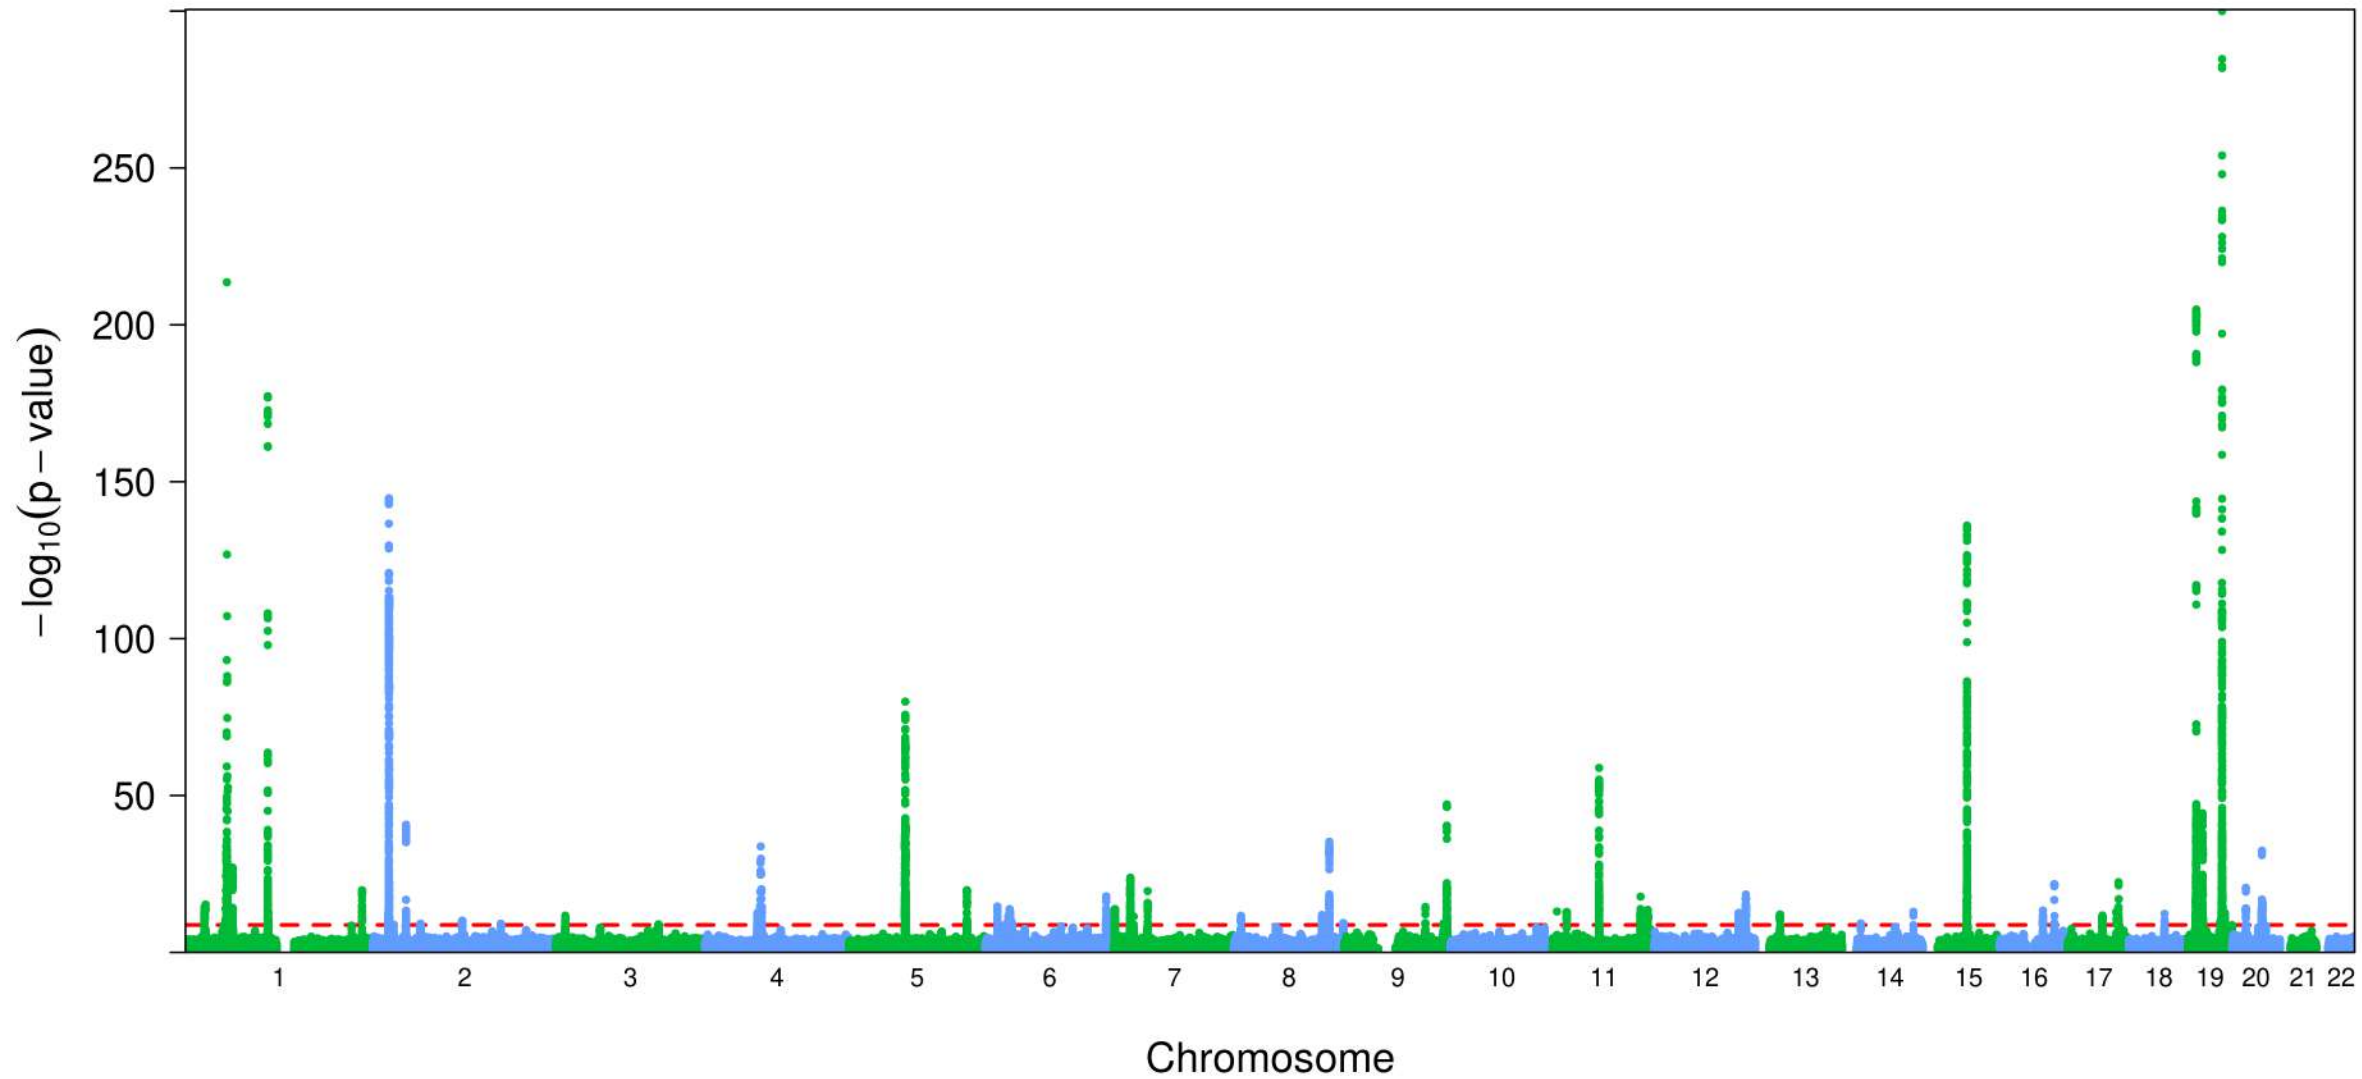

## IDL-P

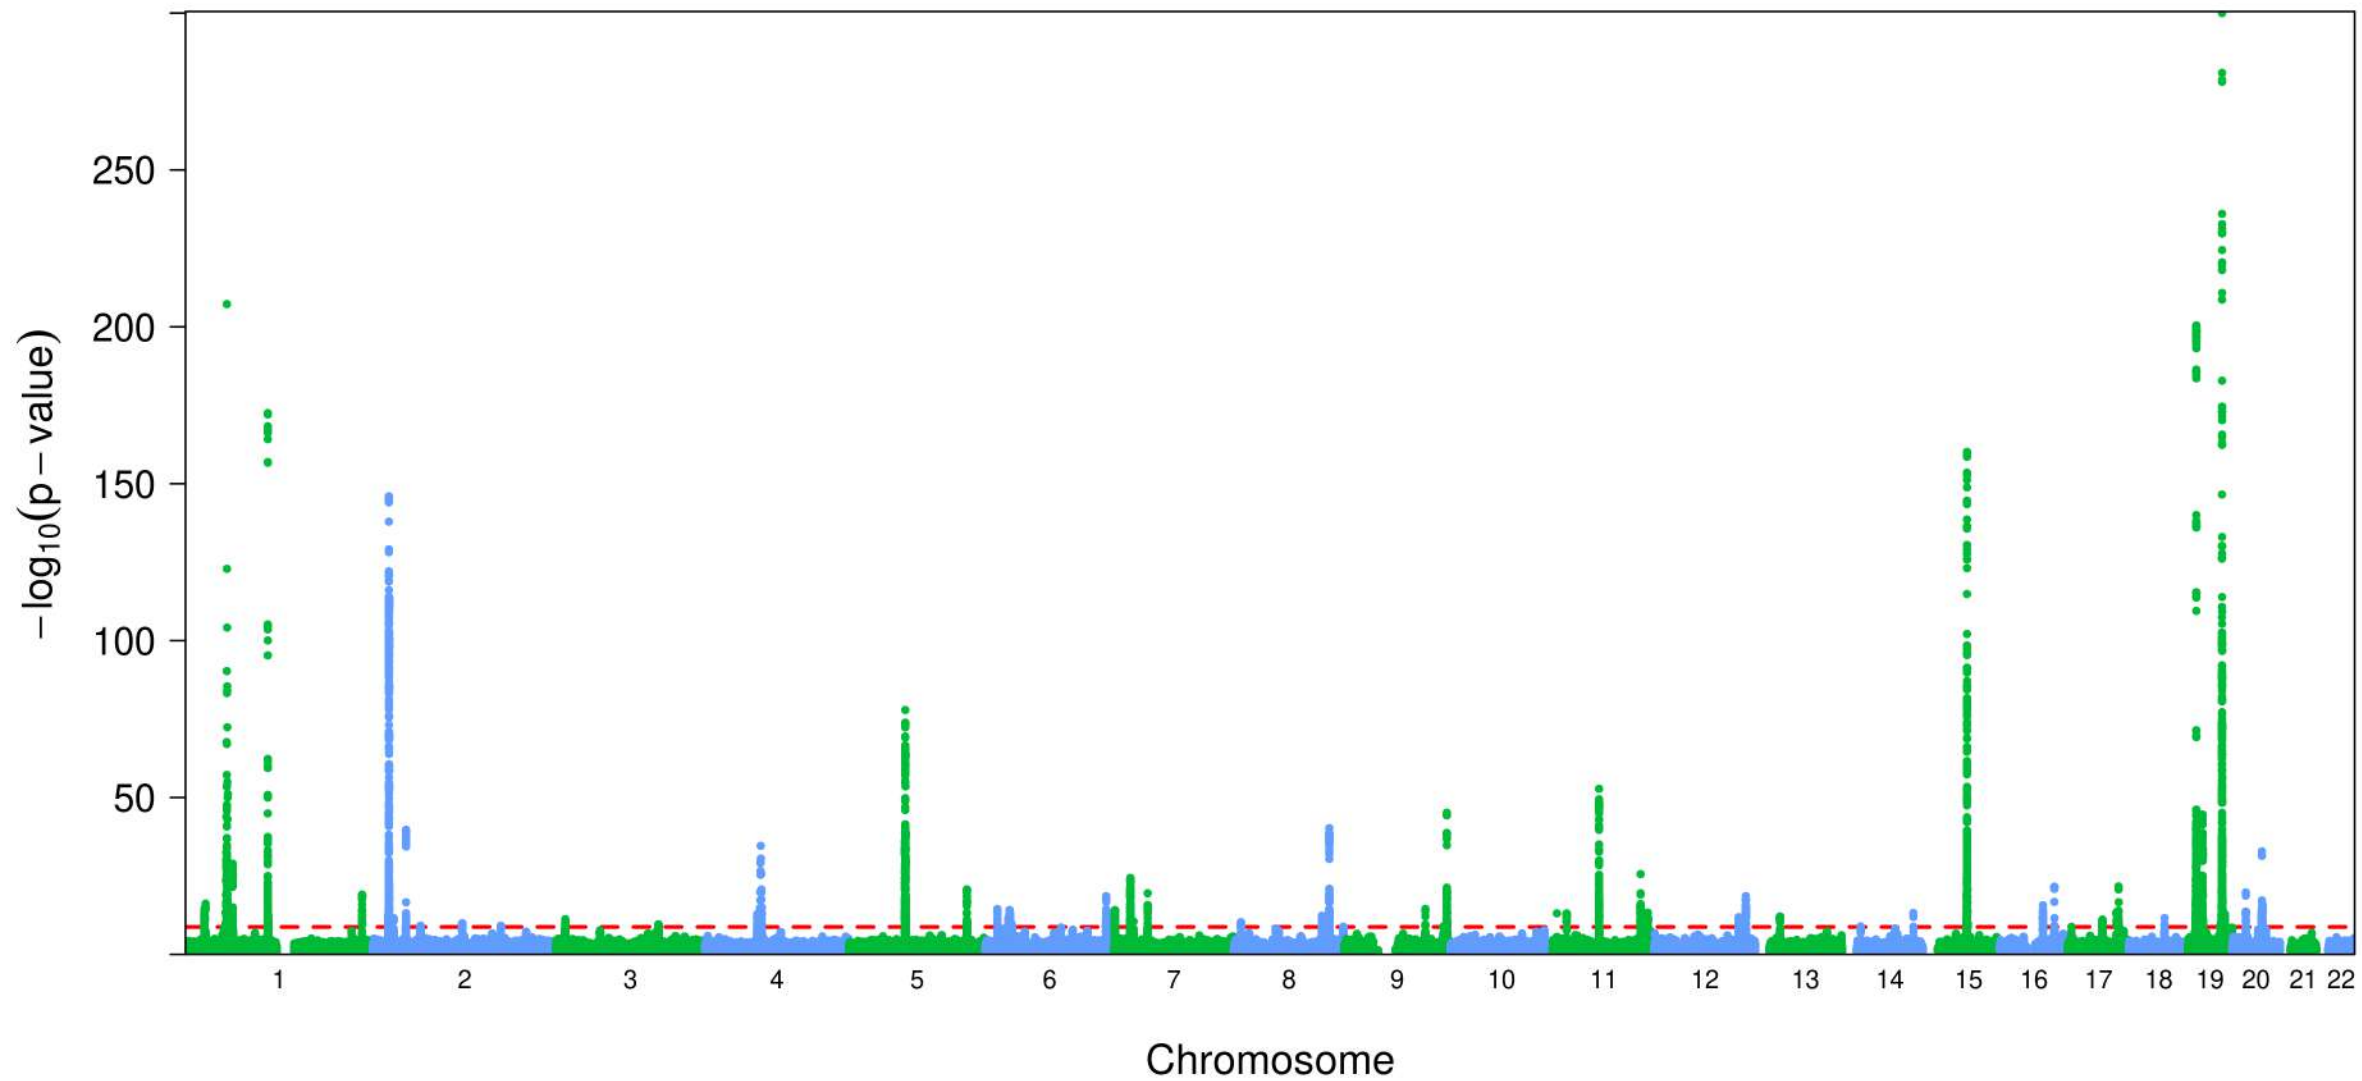

## IDL-PL

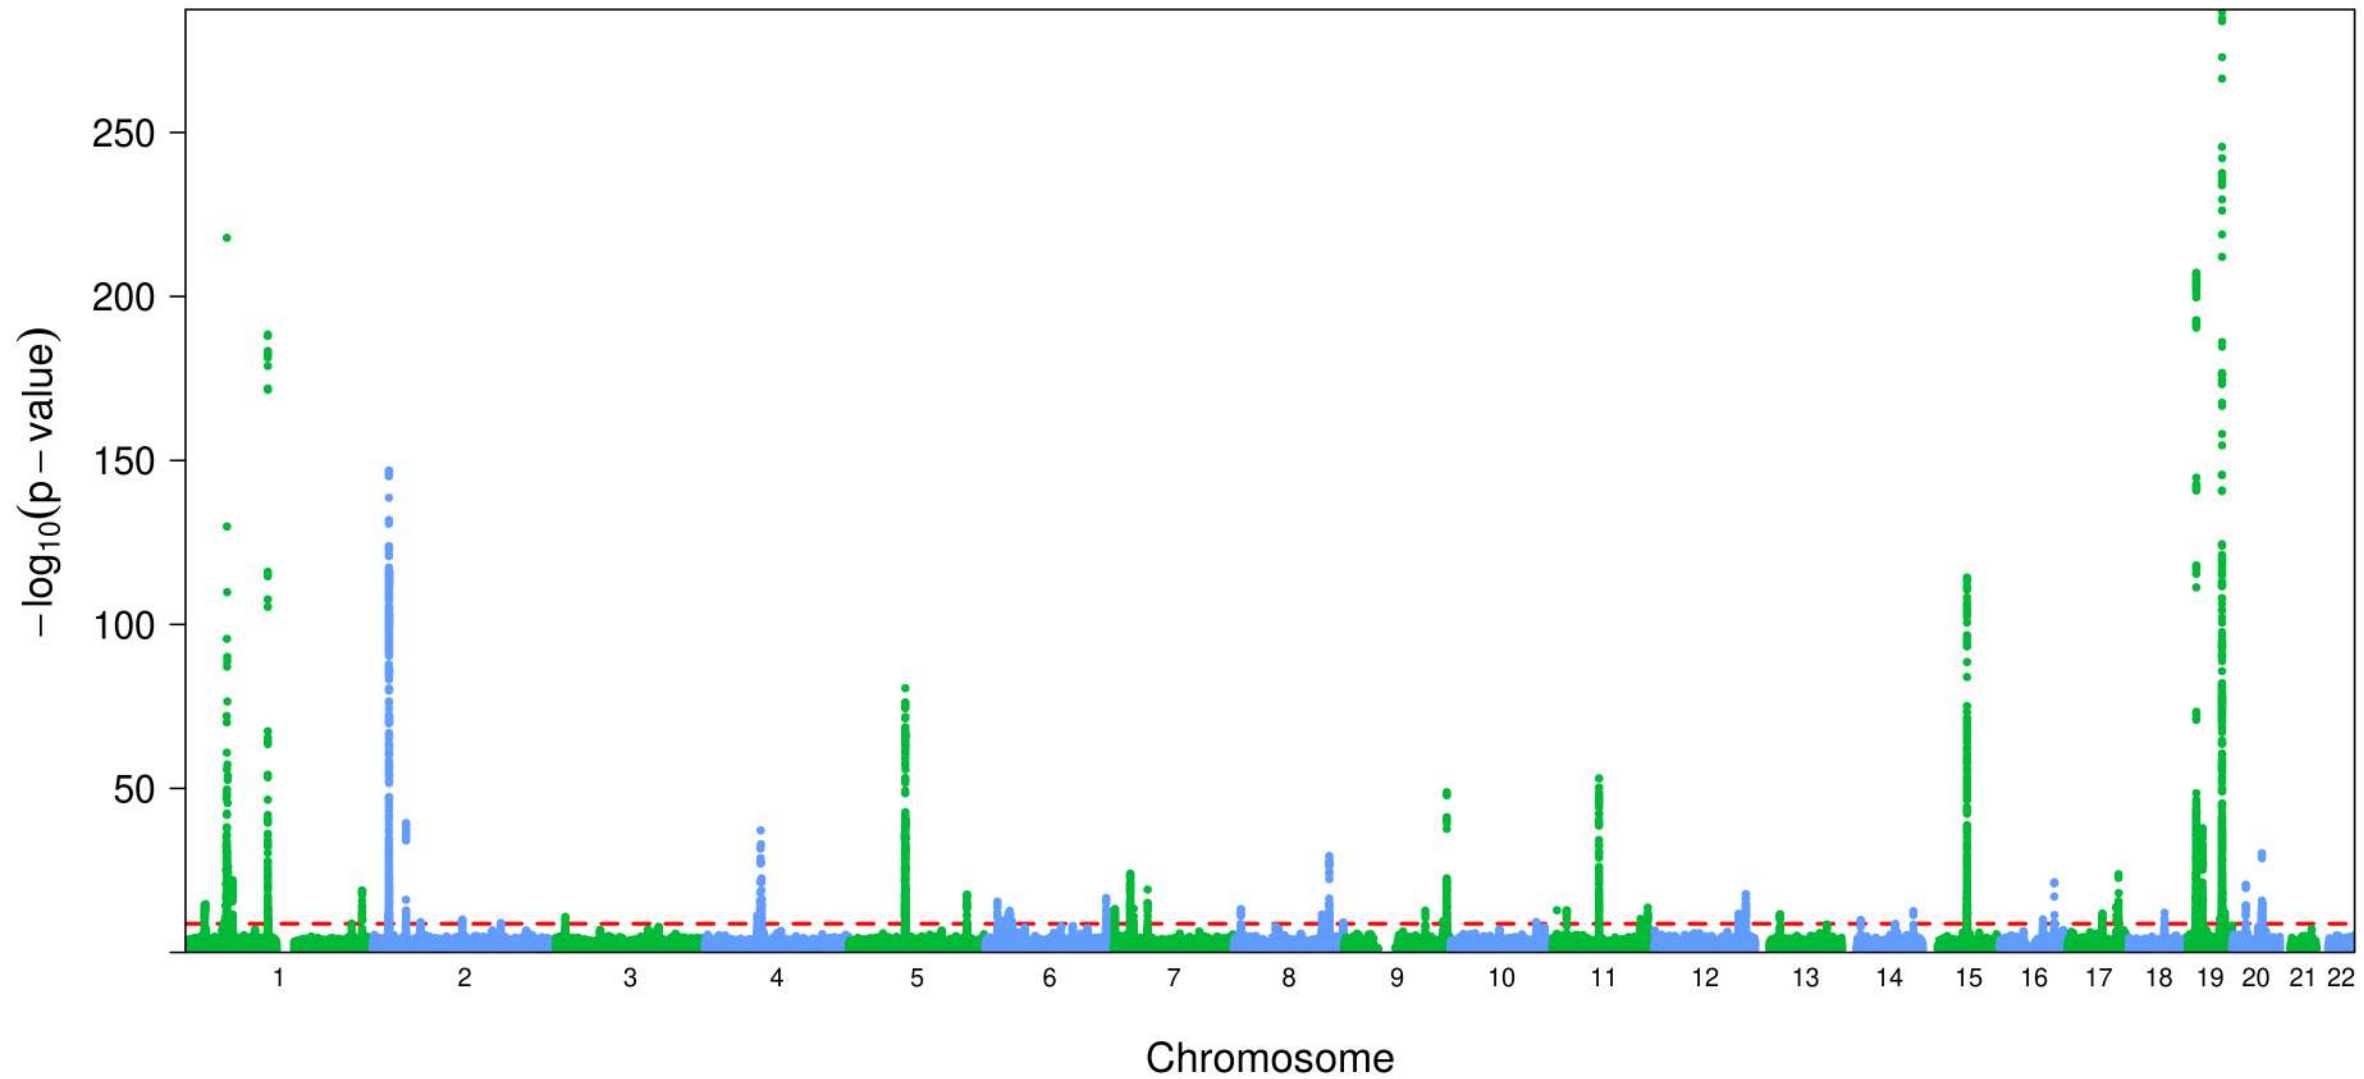

## IDL-PL\_percent

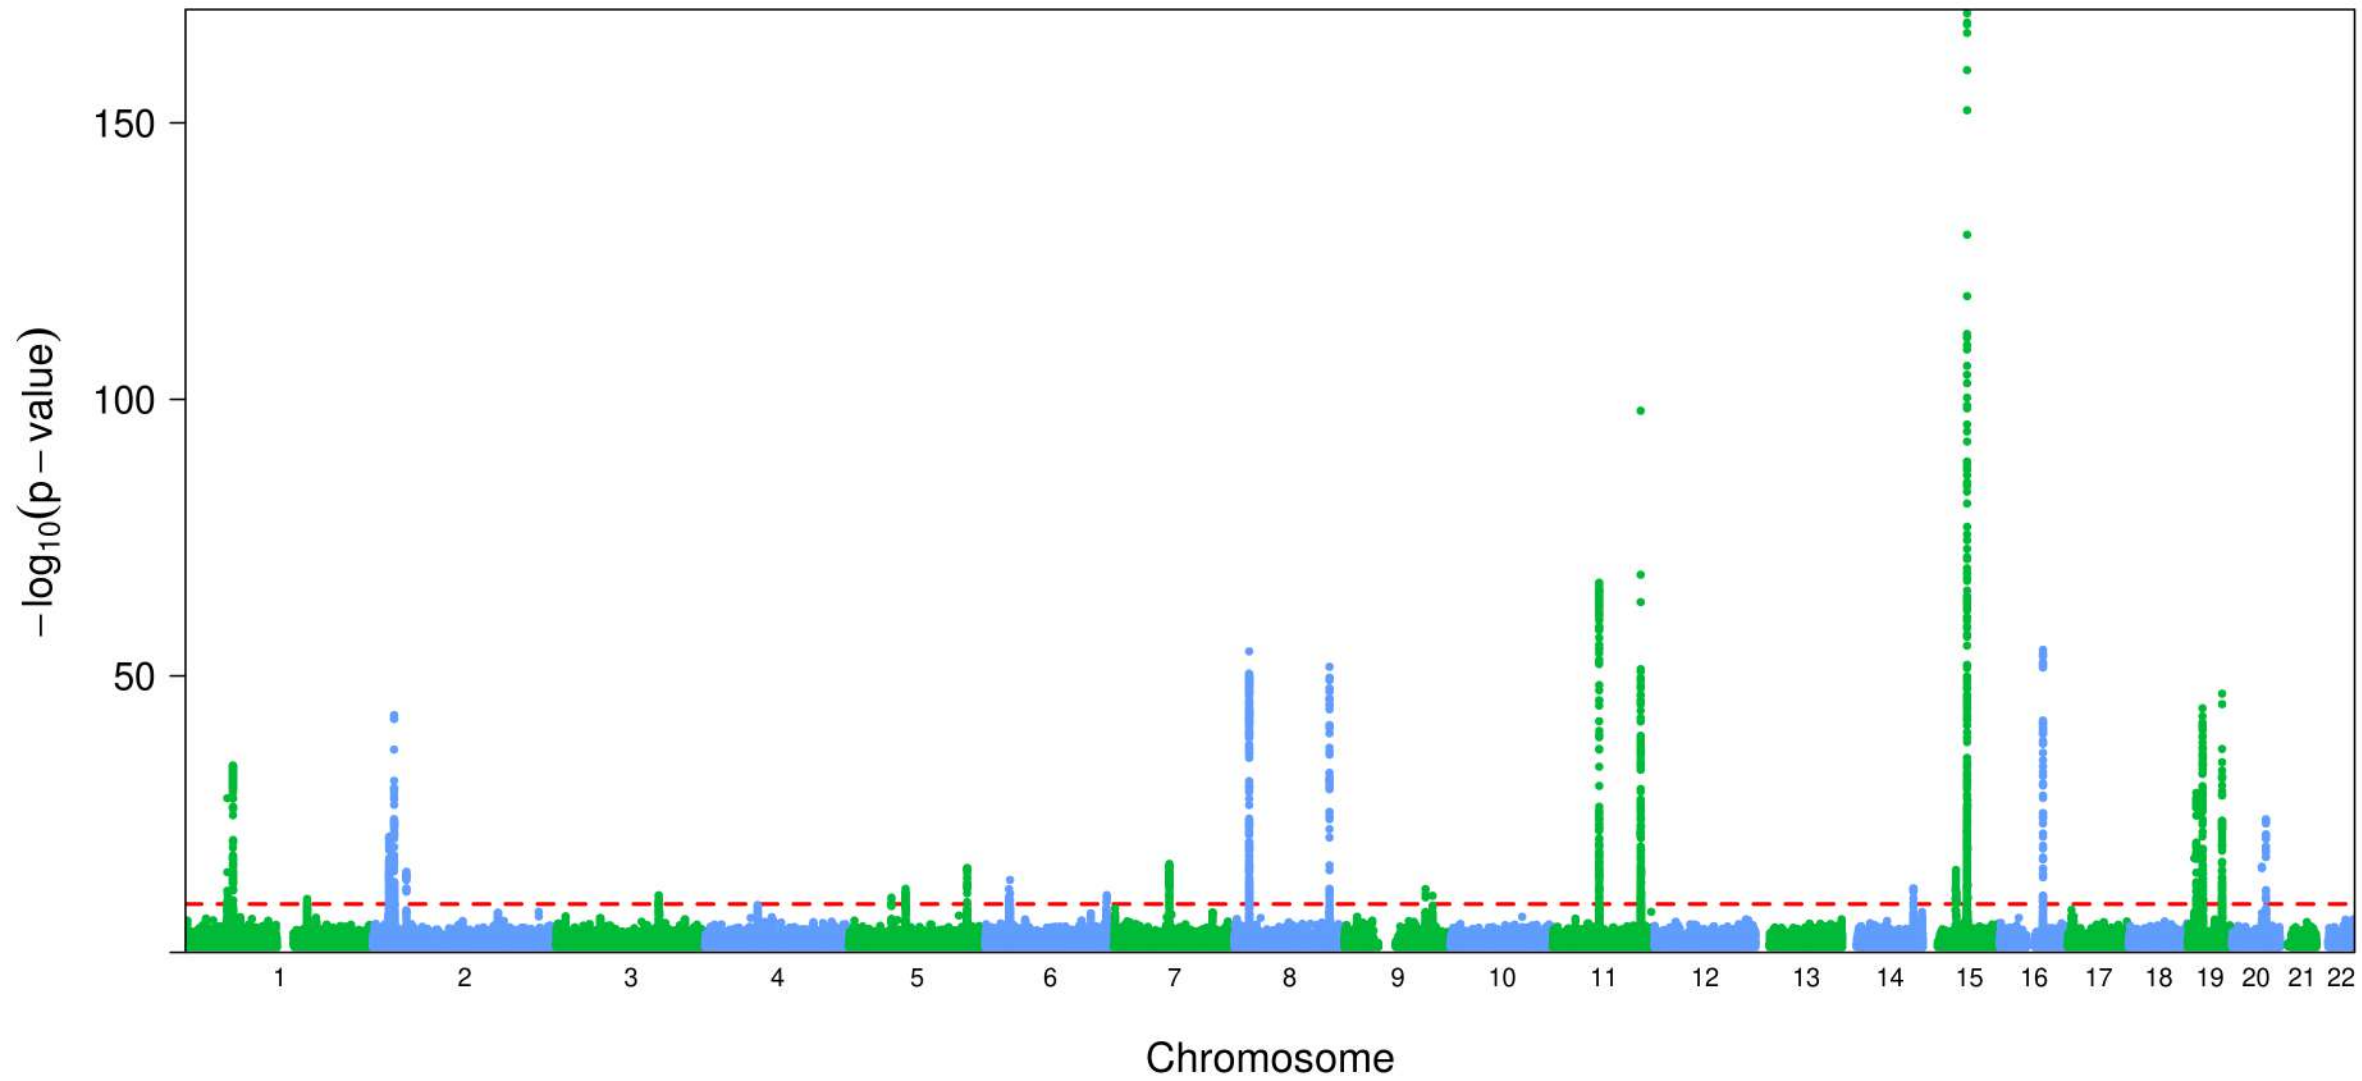

## IDL-TG

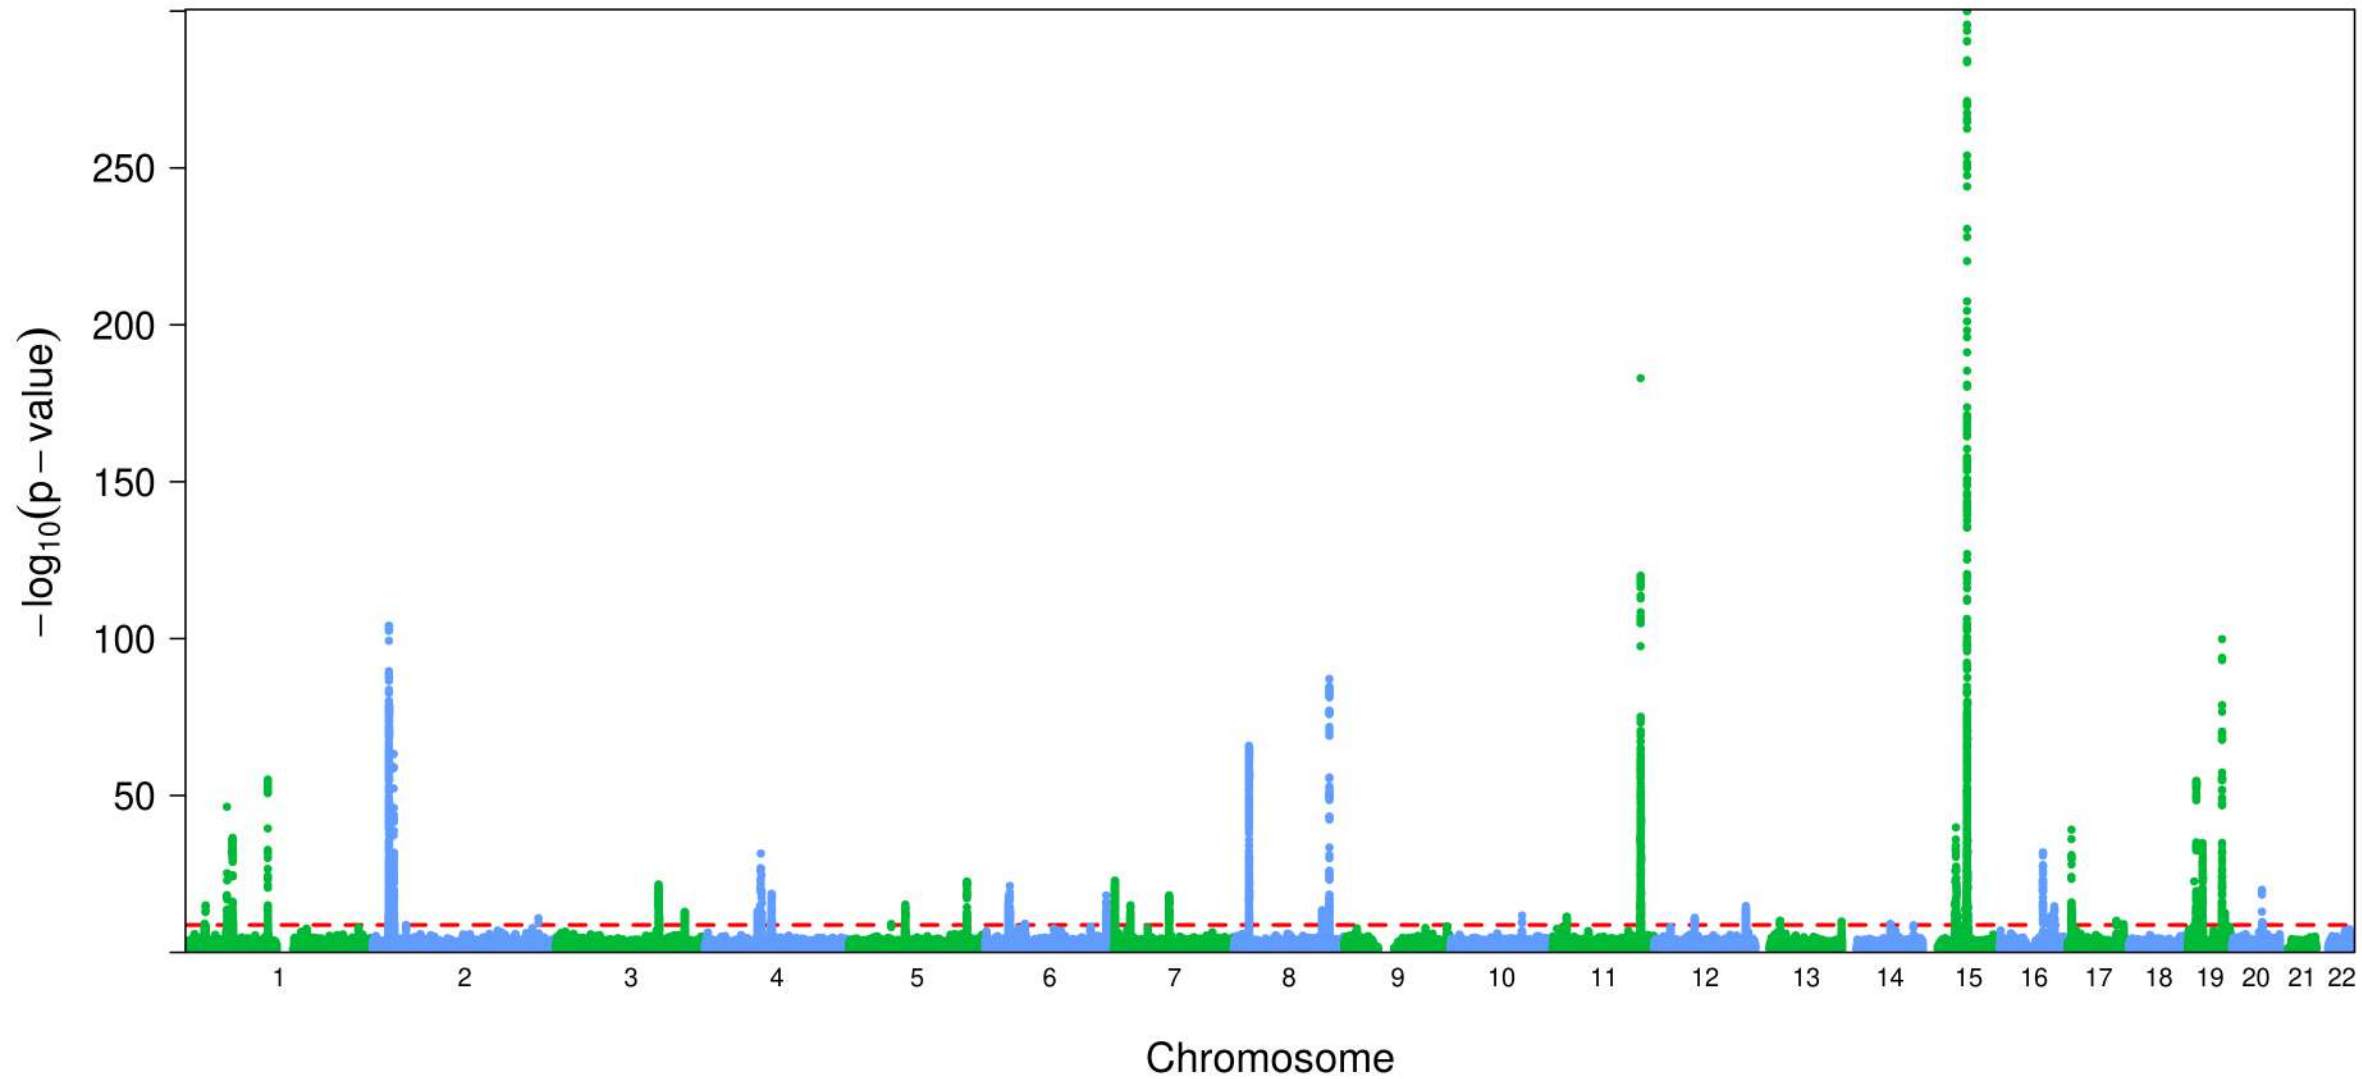

## IDL-TG\_percent

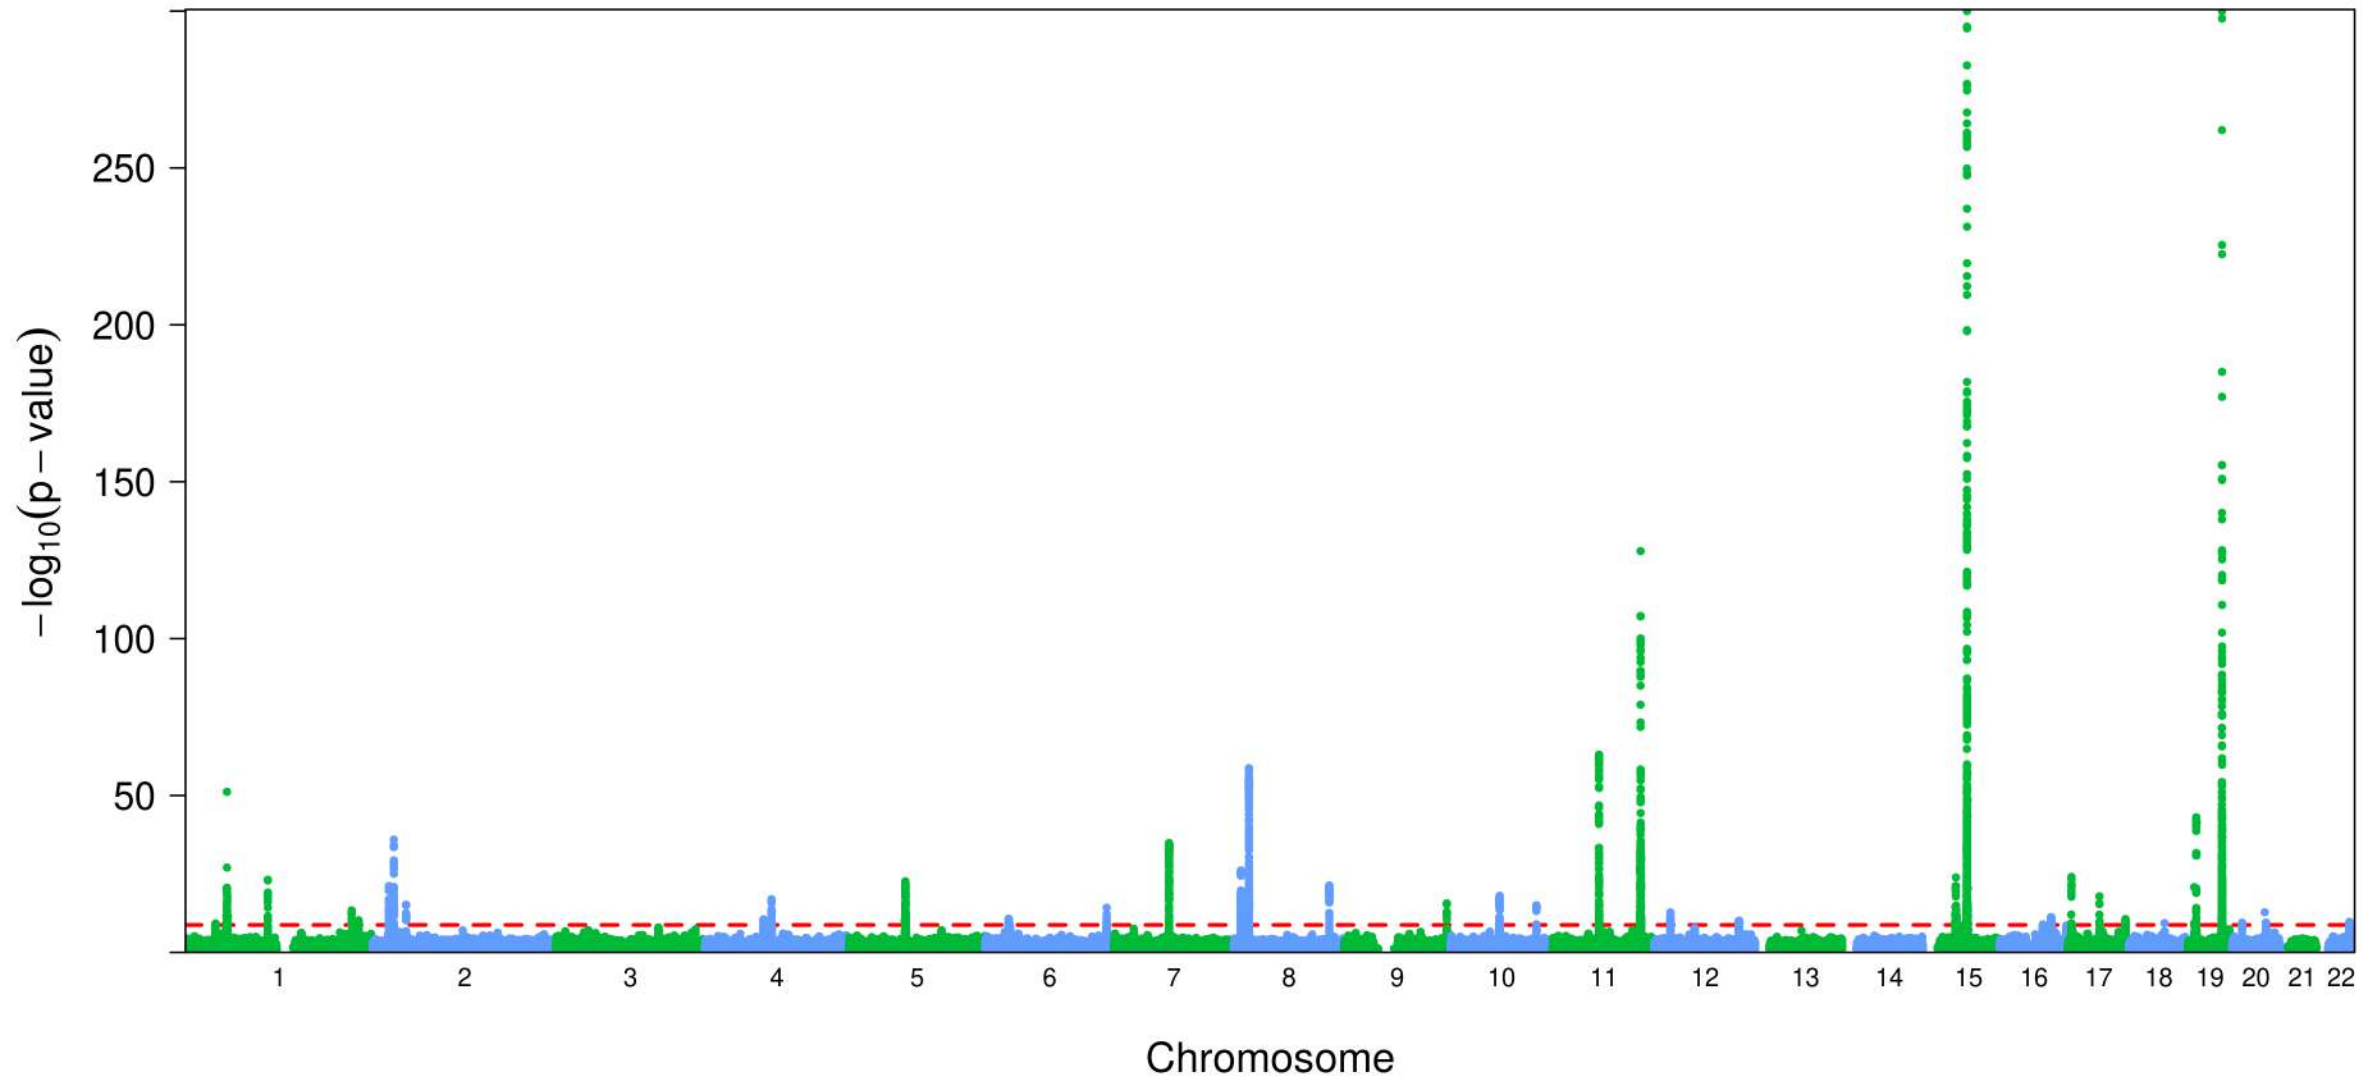

Ile

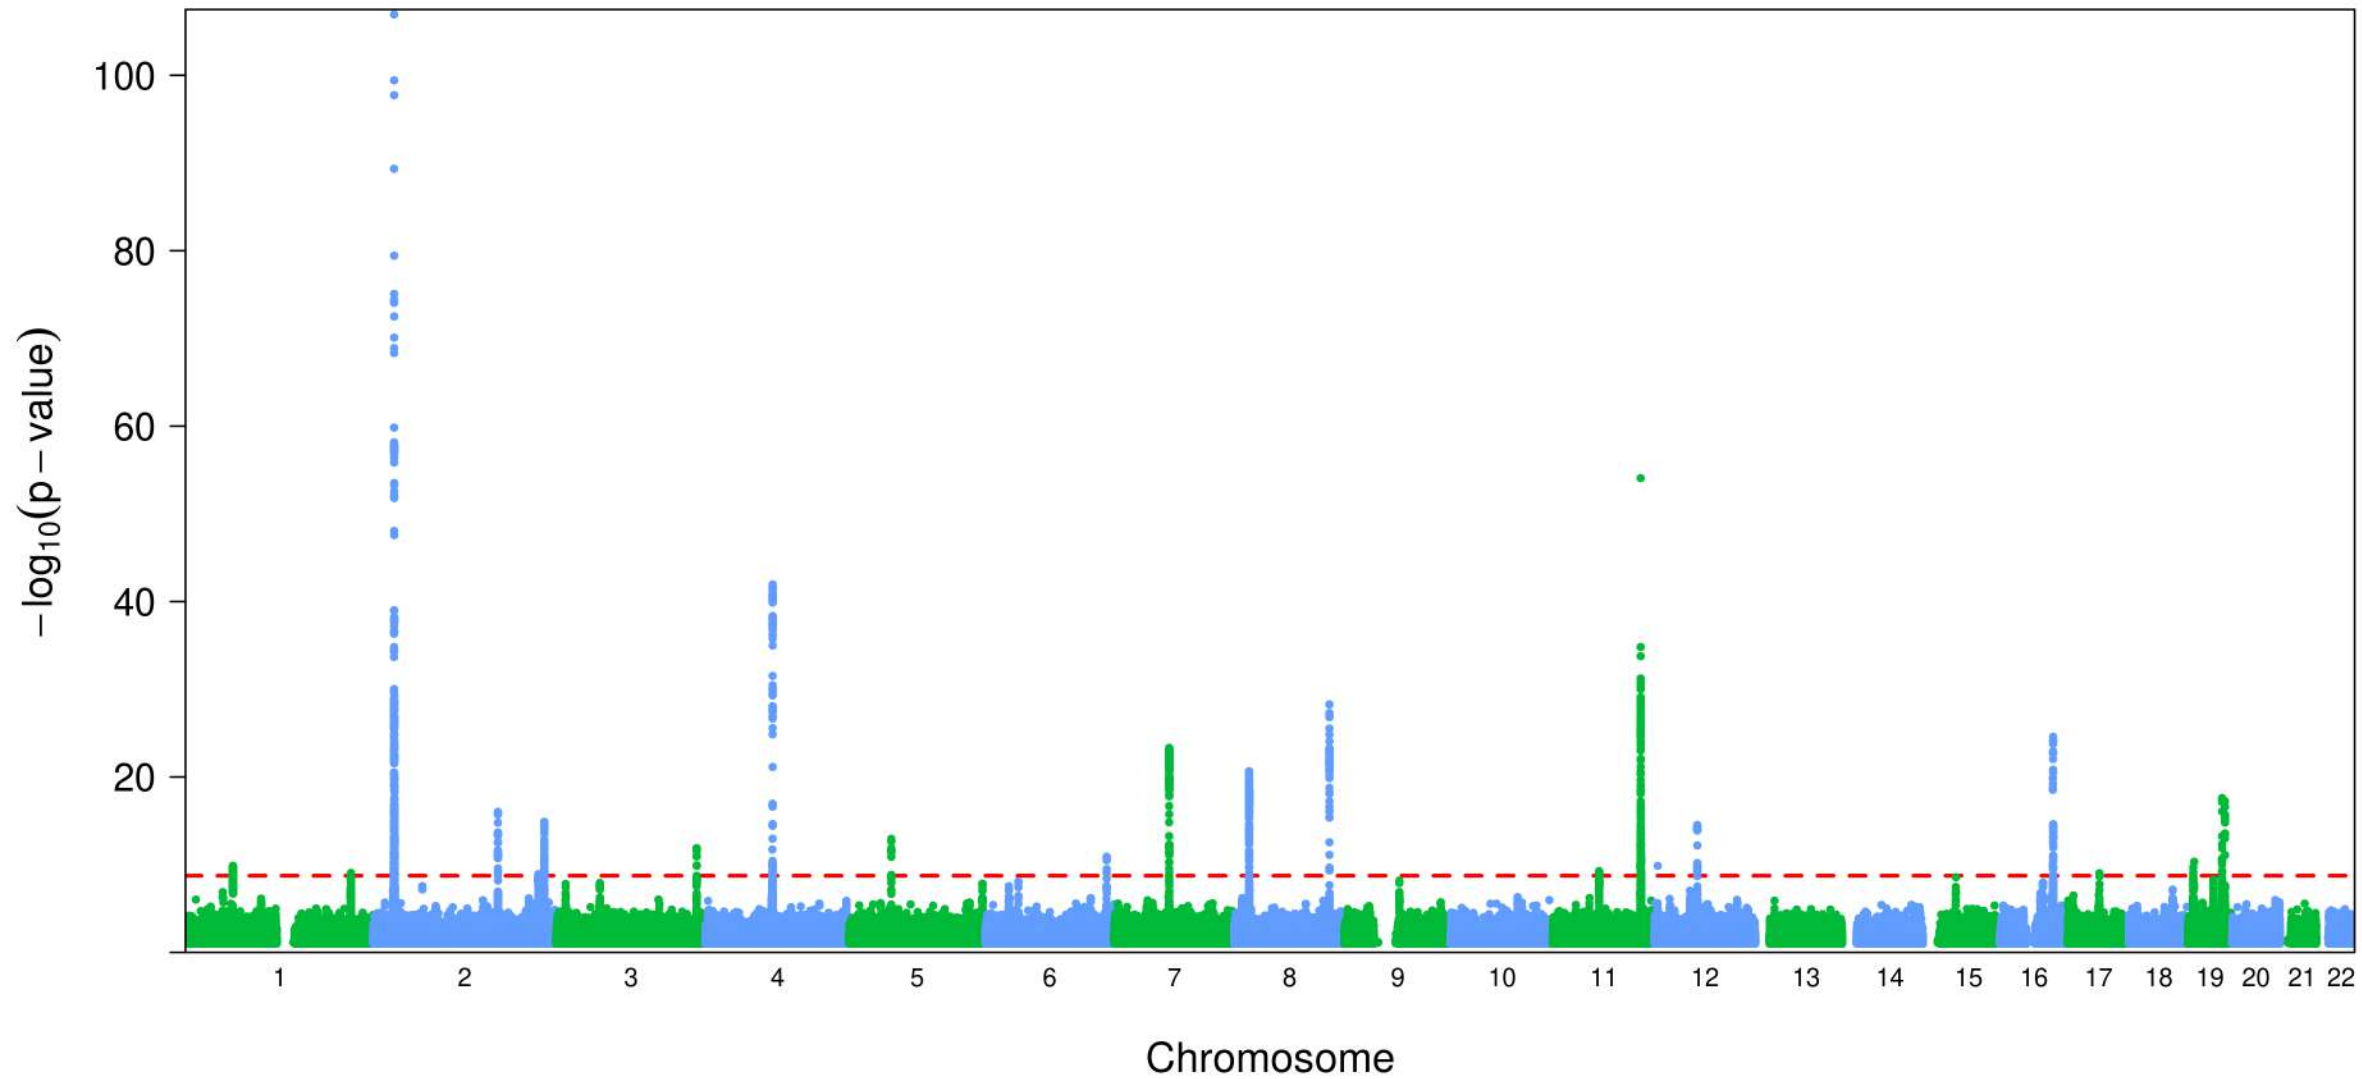

# L-HDL-C

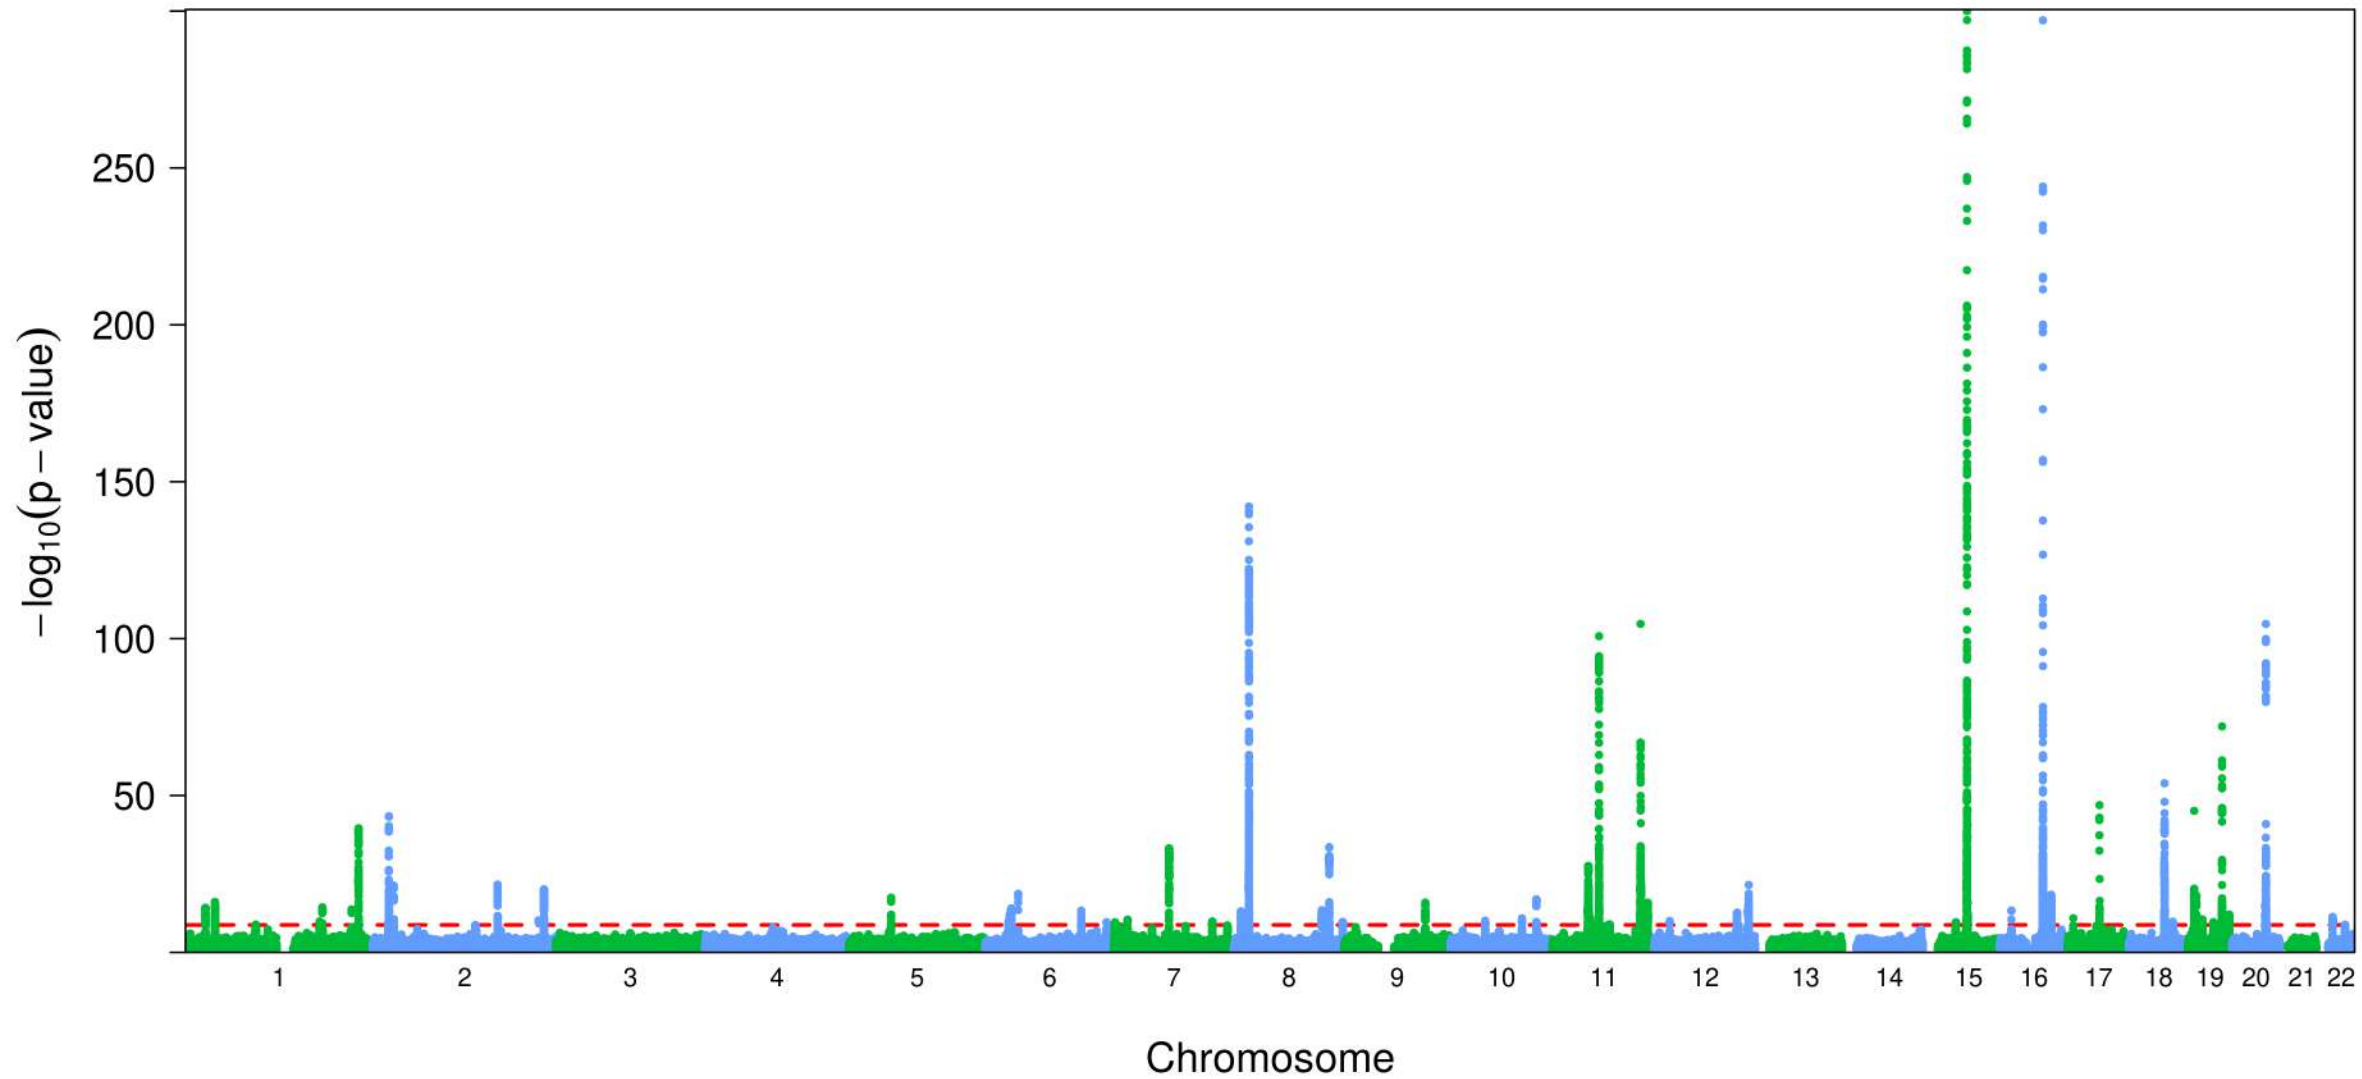



# L-HDL-C\_percent

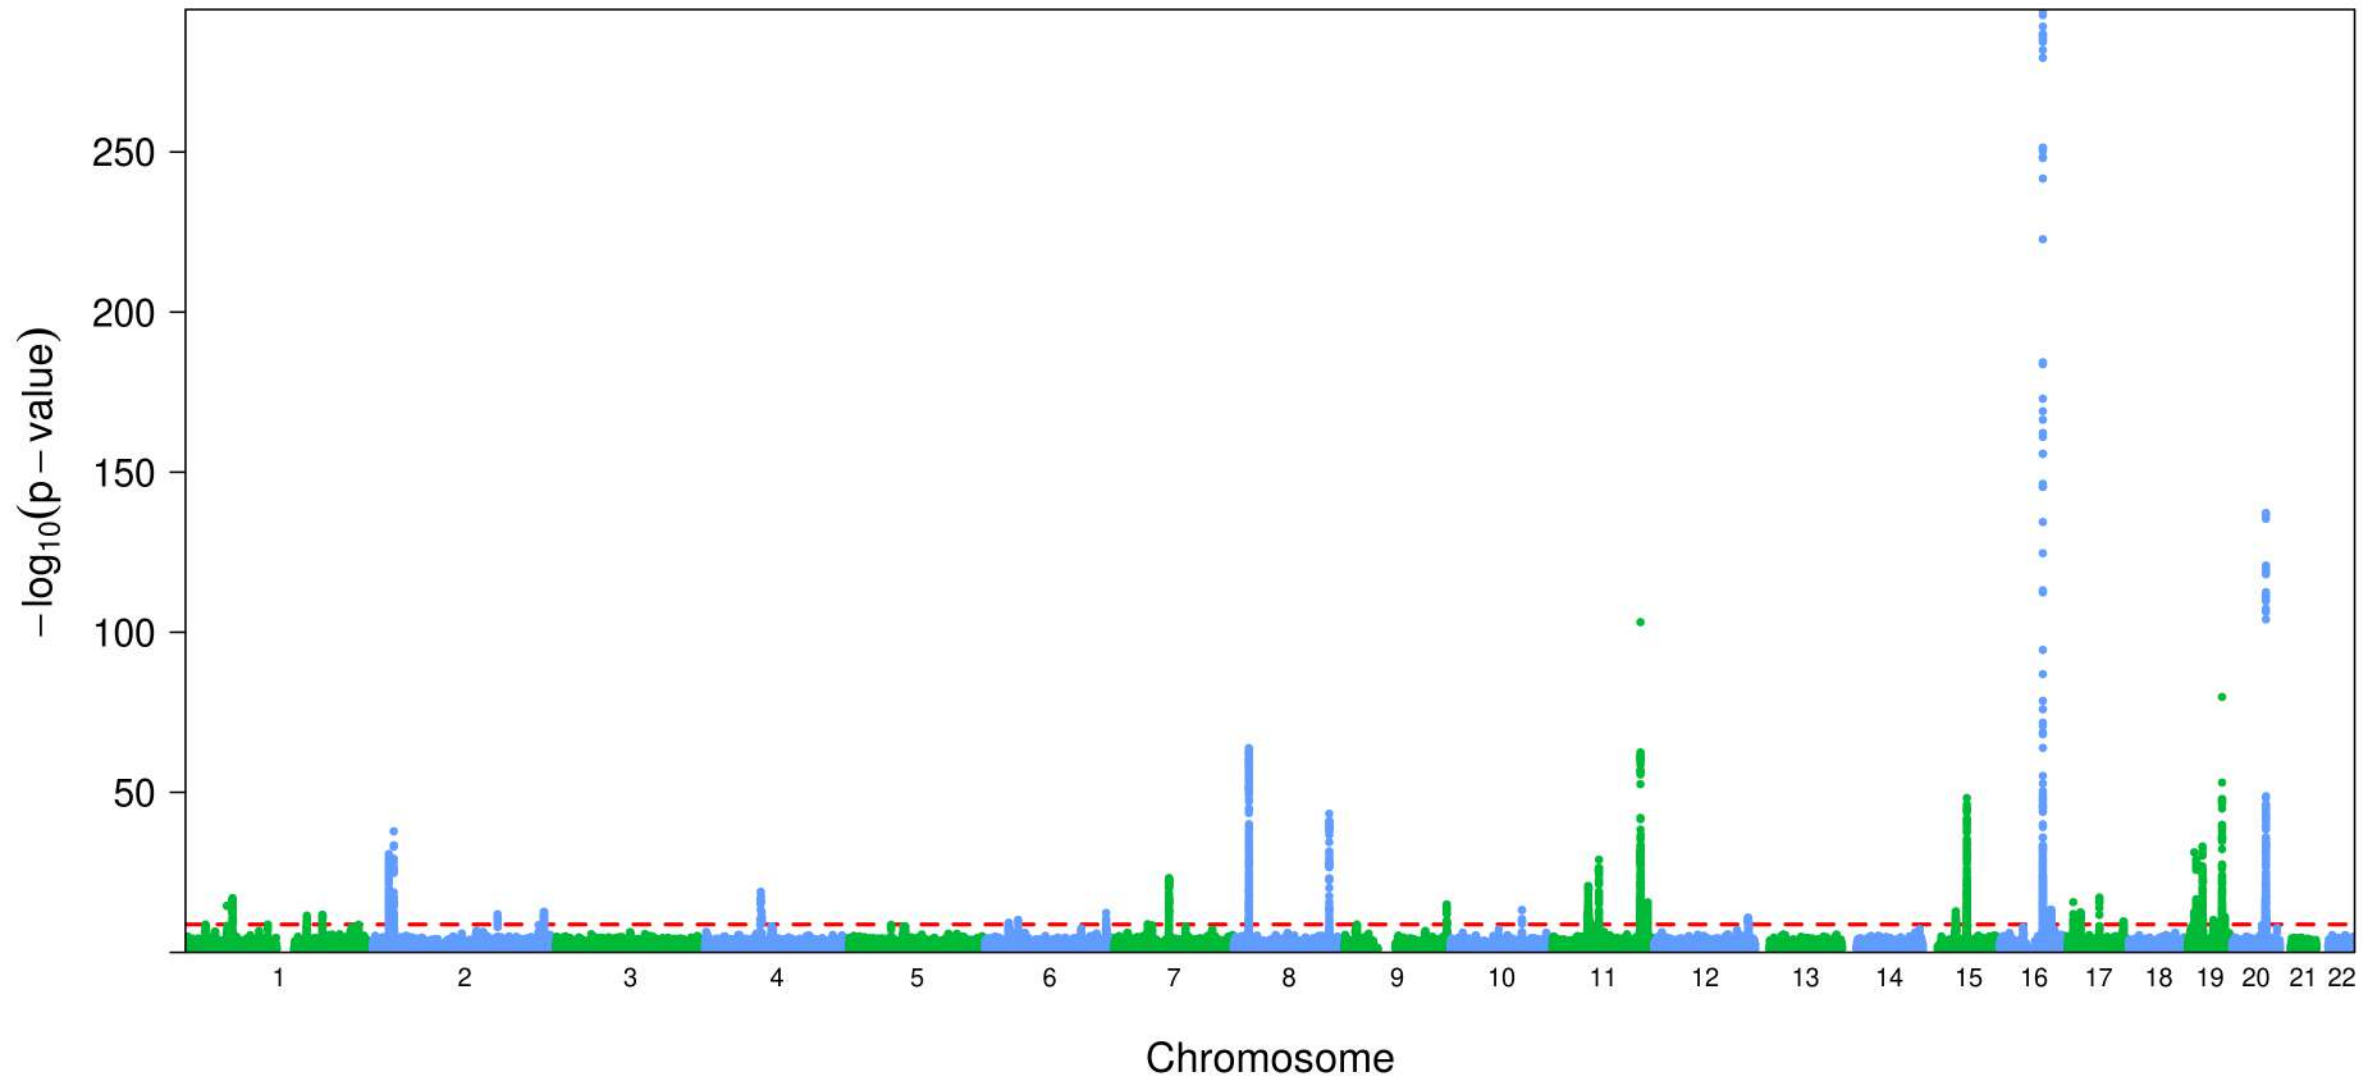

# L-HDL-CE

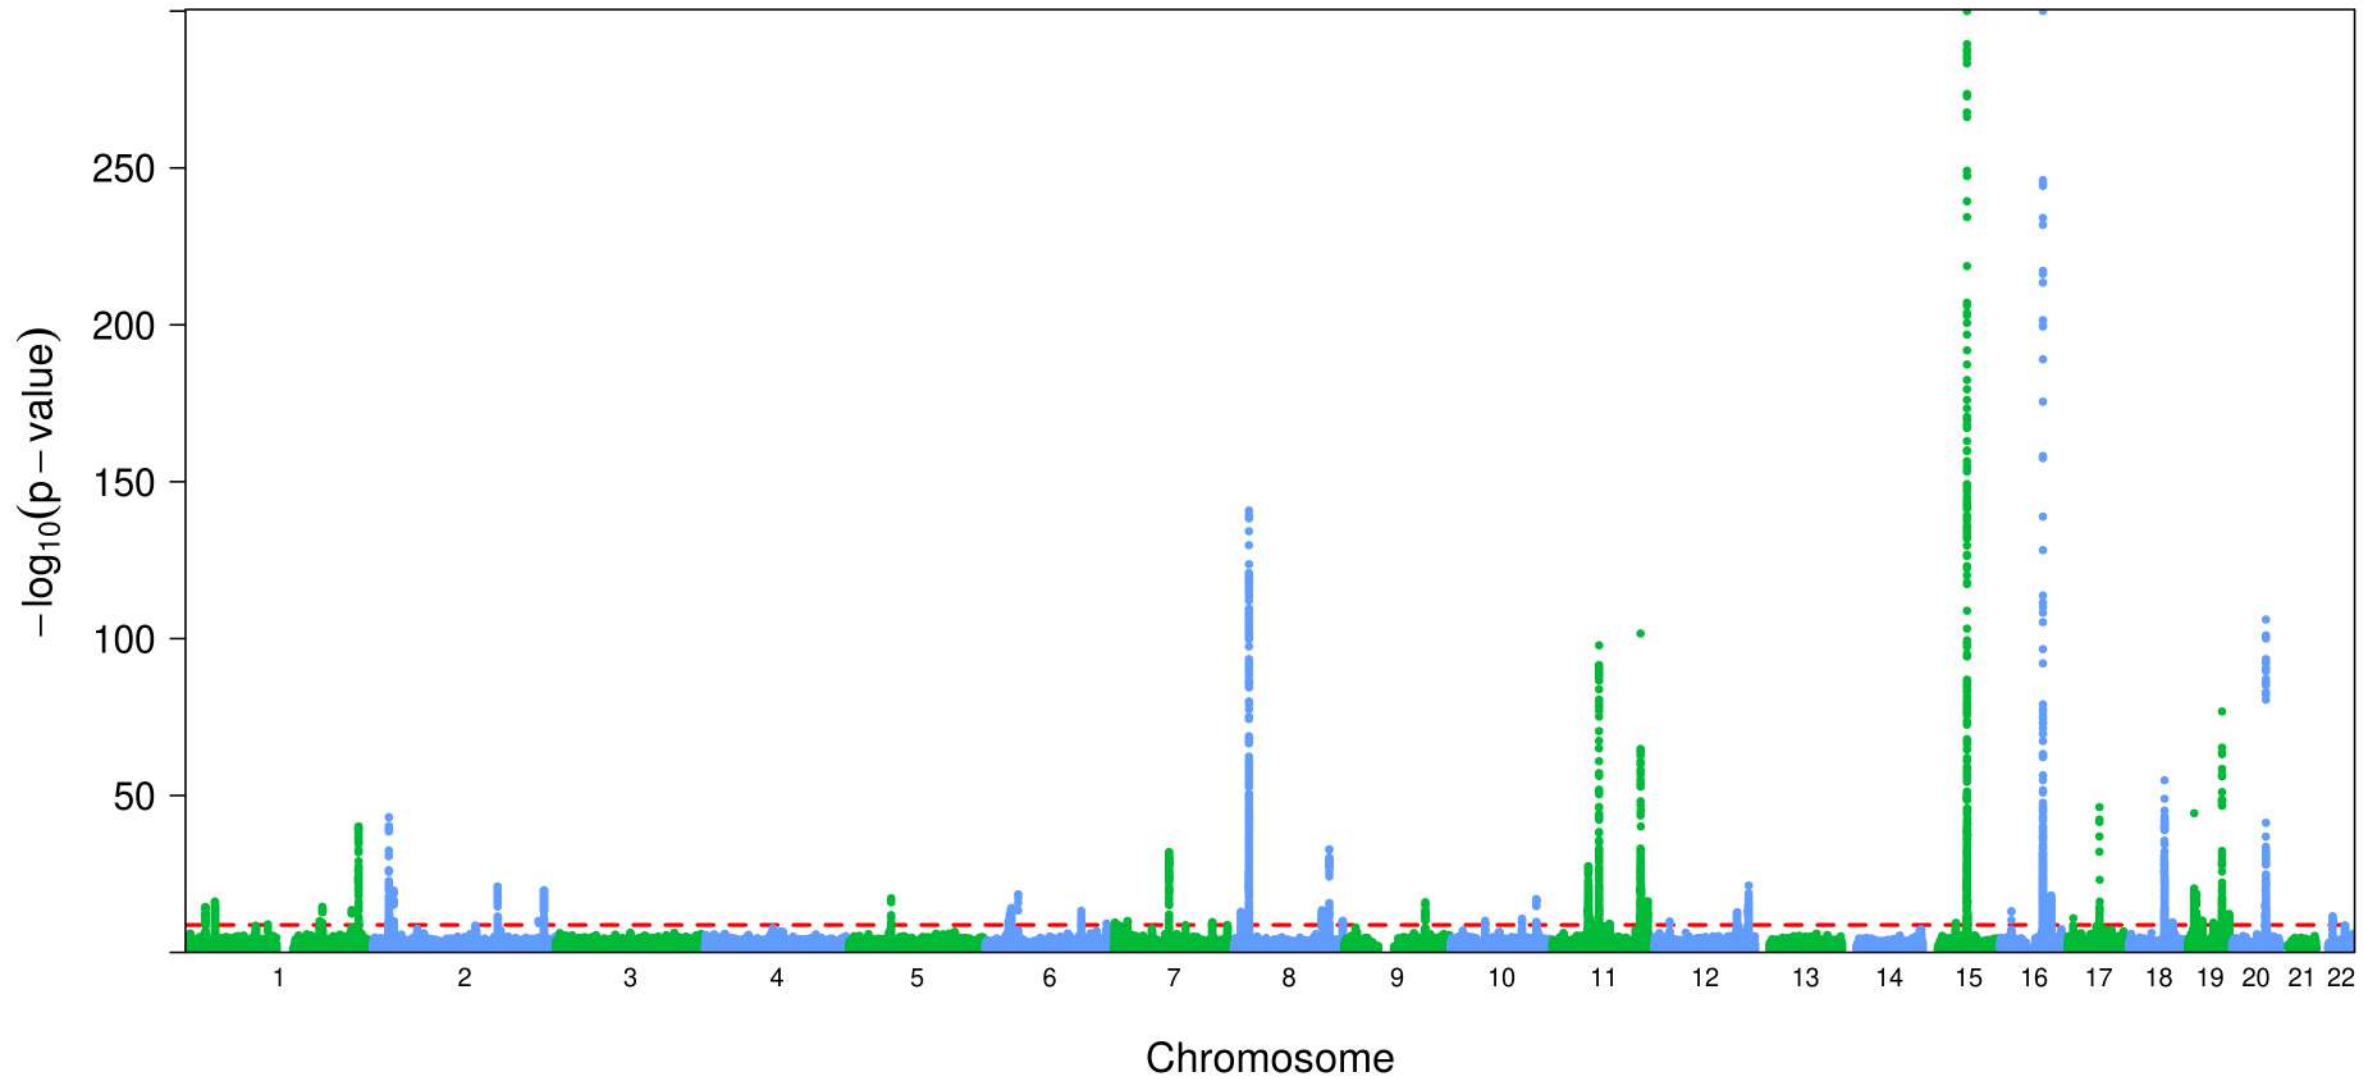

# L-HDL-CE\_percent

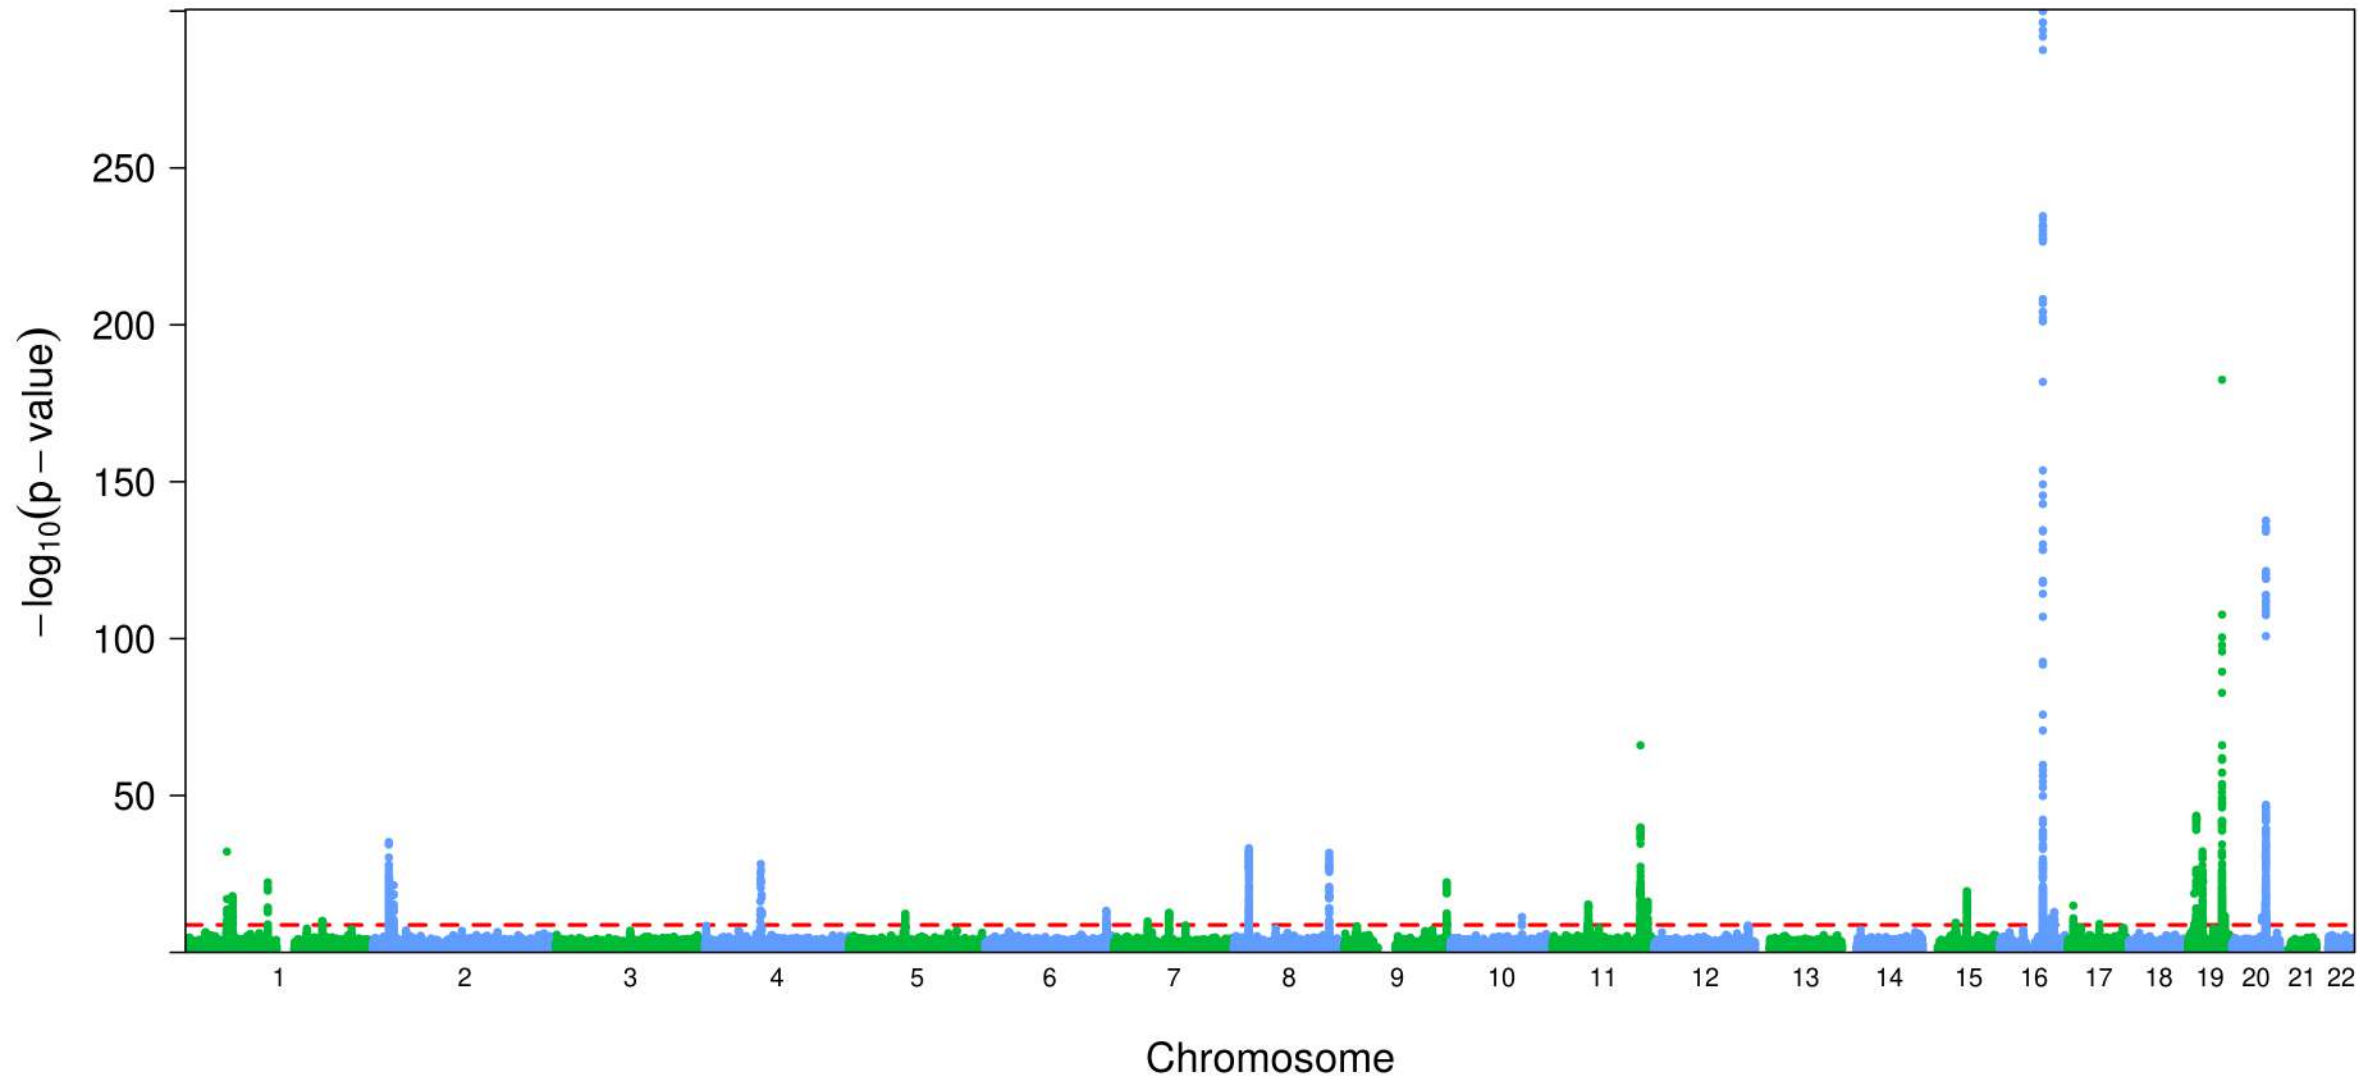

# L-HDL-FC

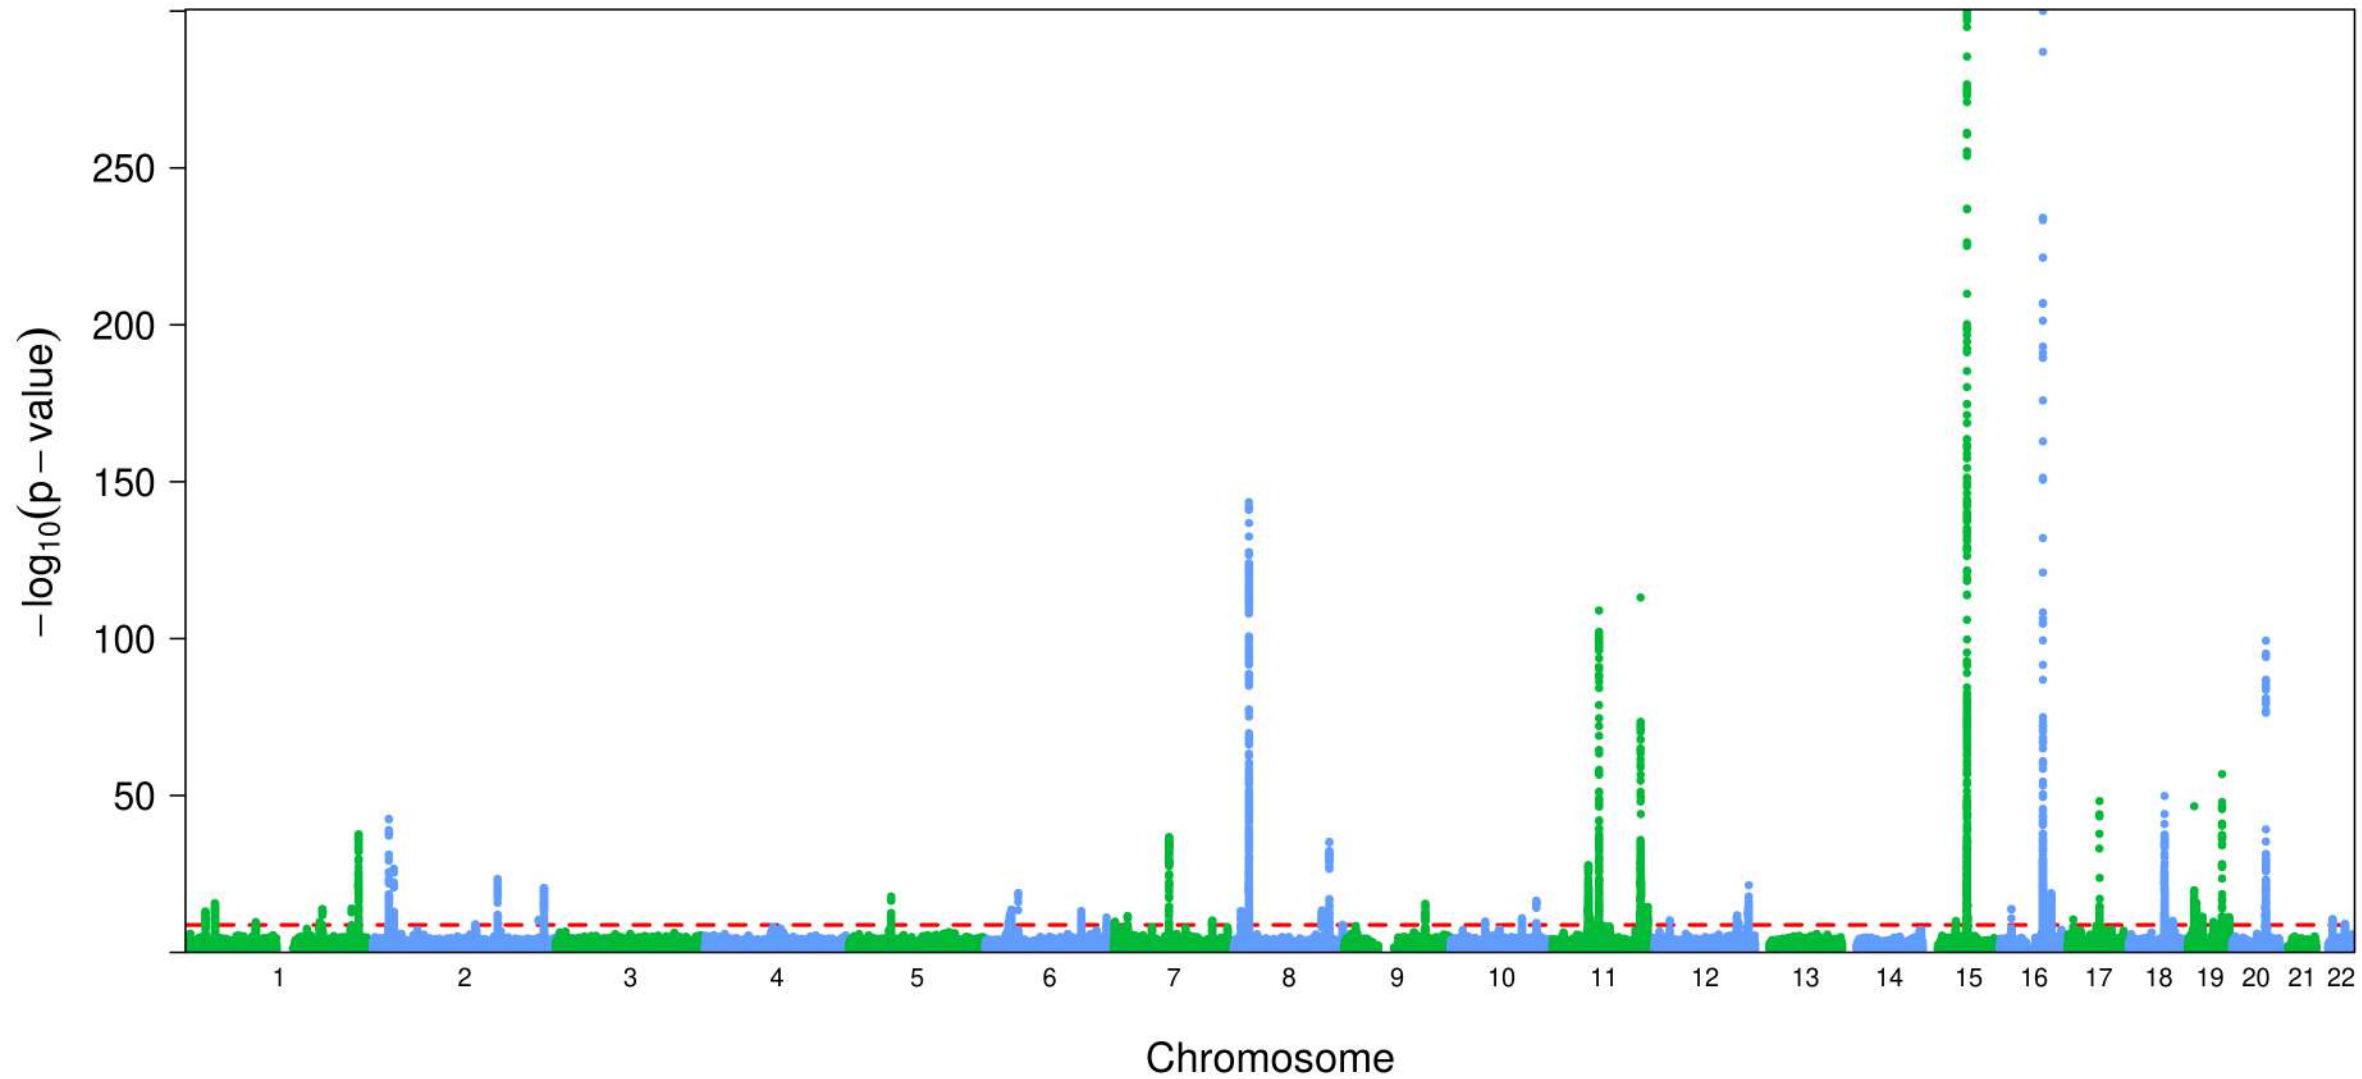

# L-HDL-FC\_percent

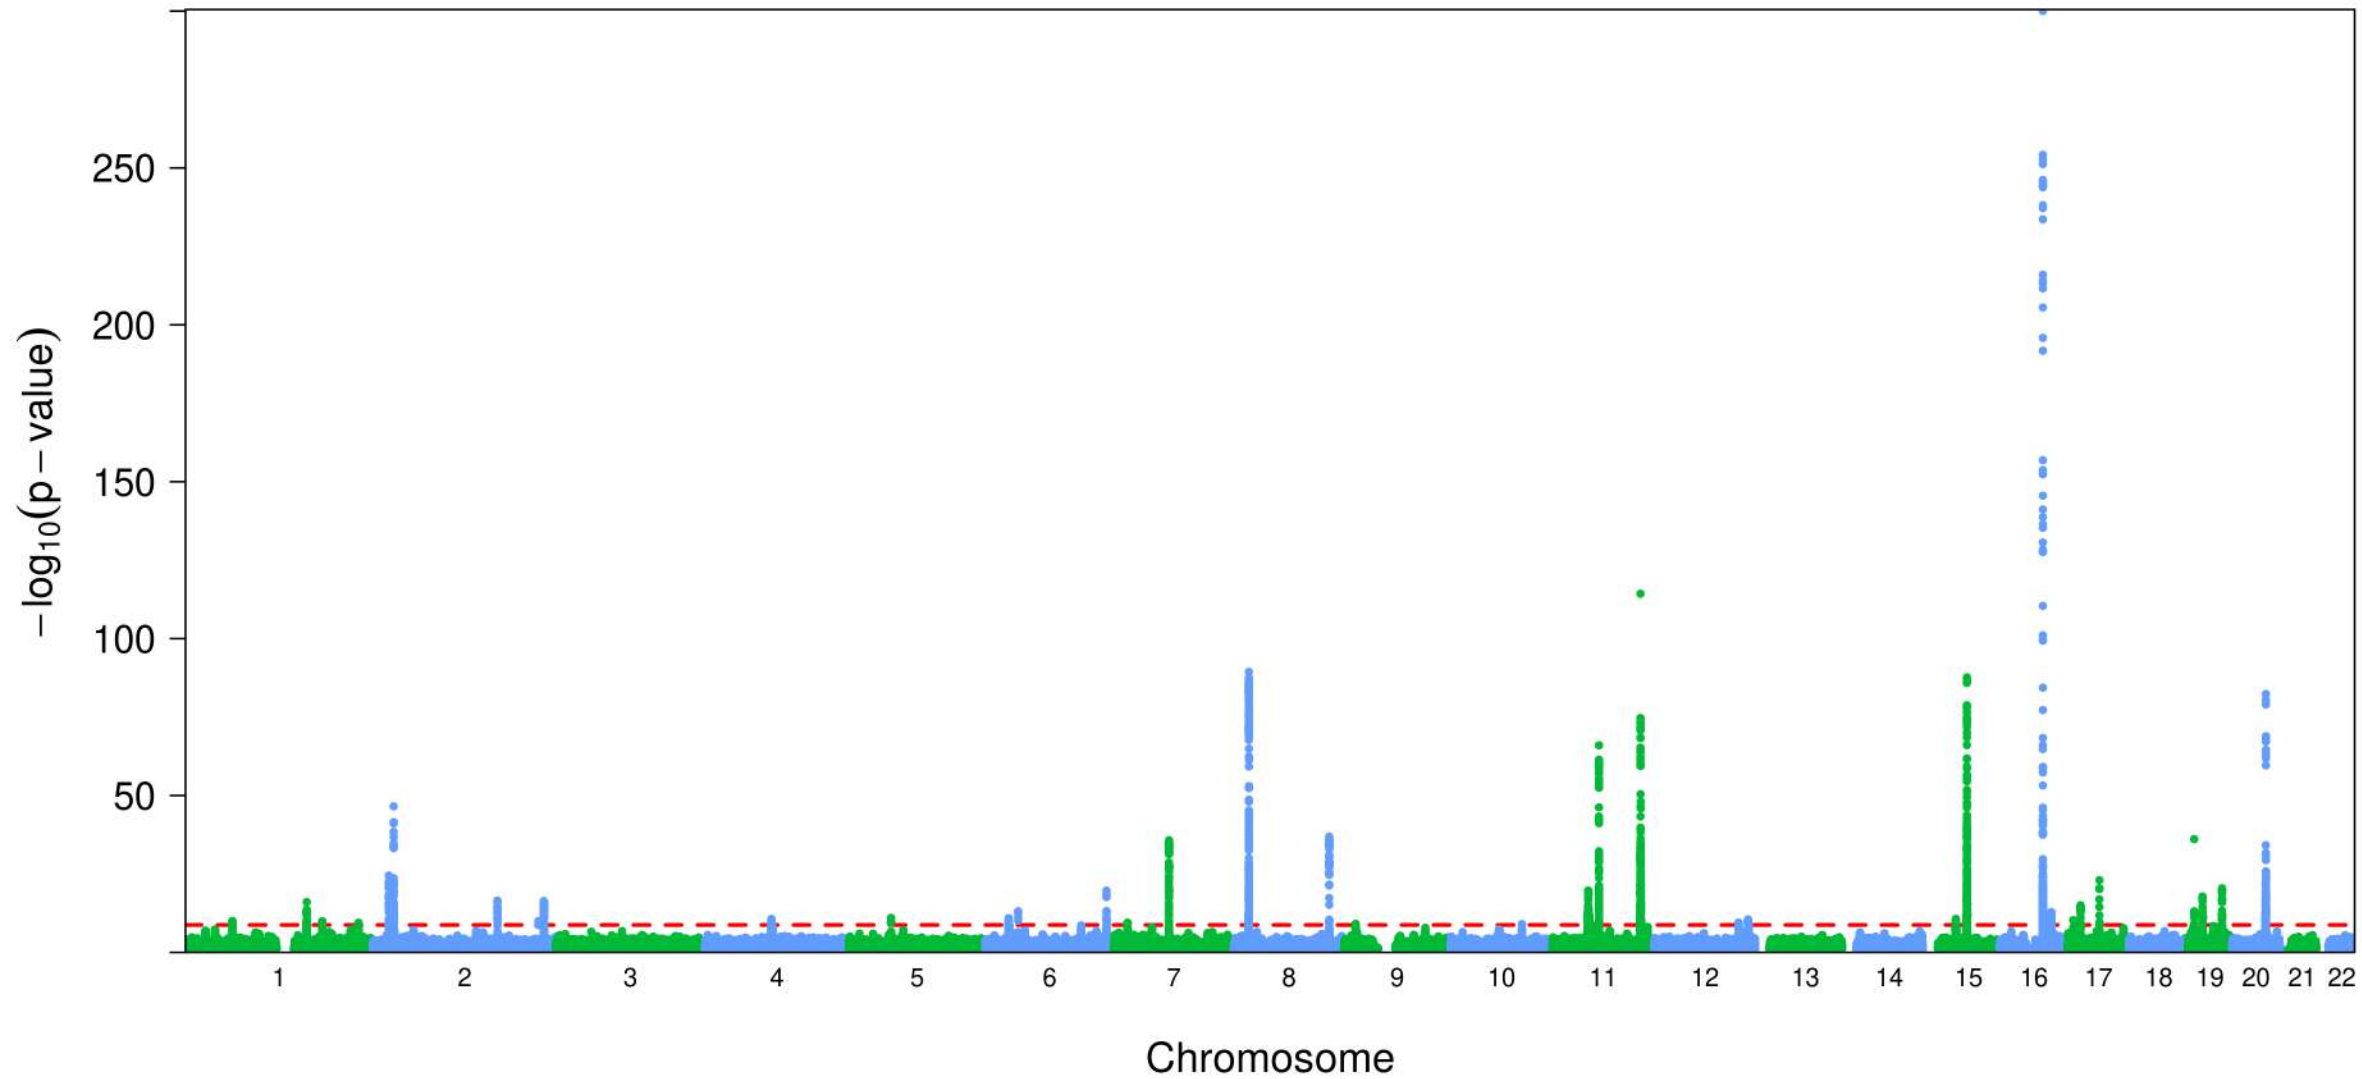

# L-HDL-L

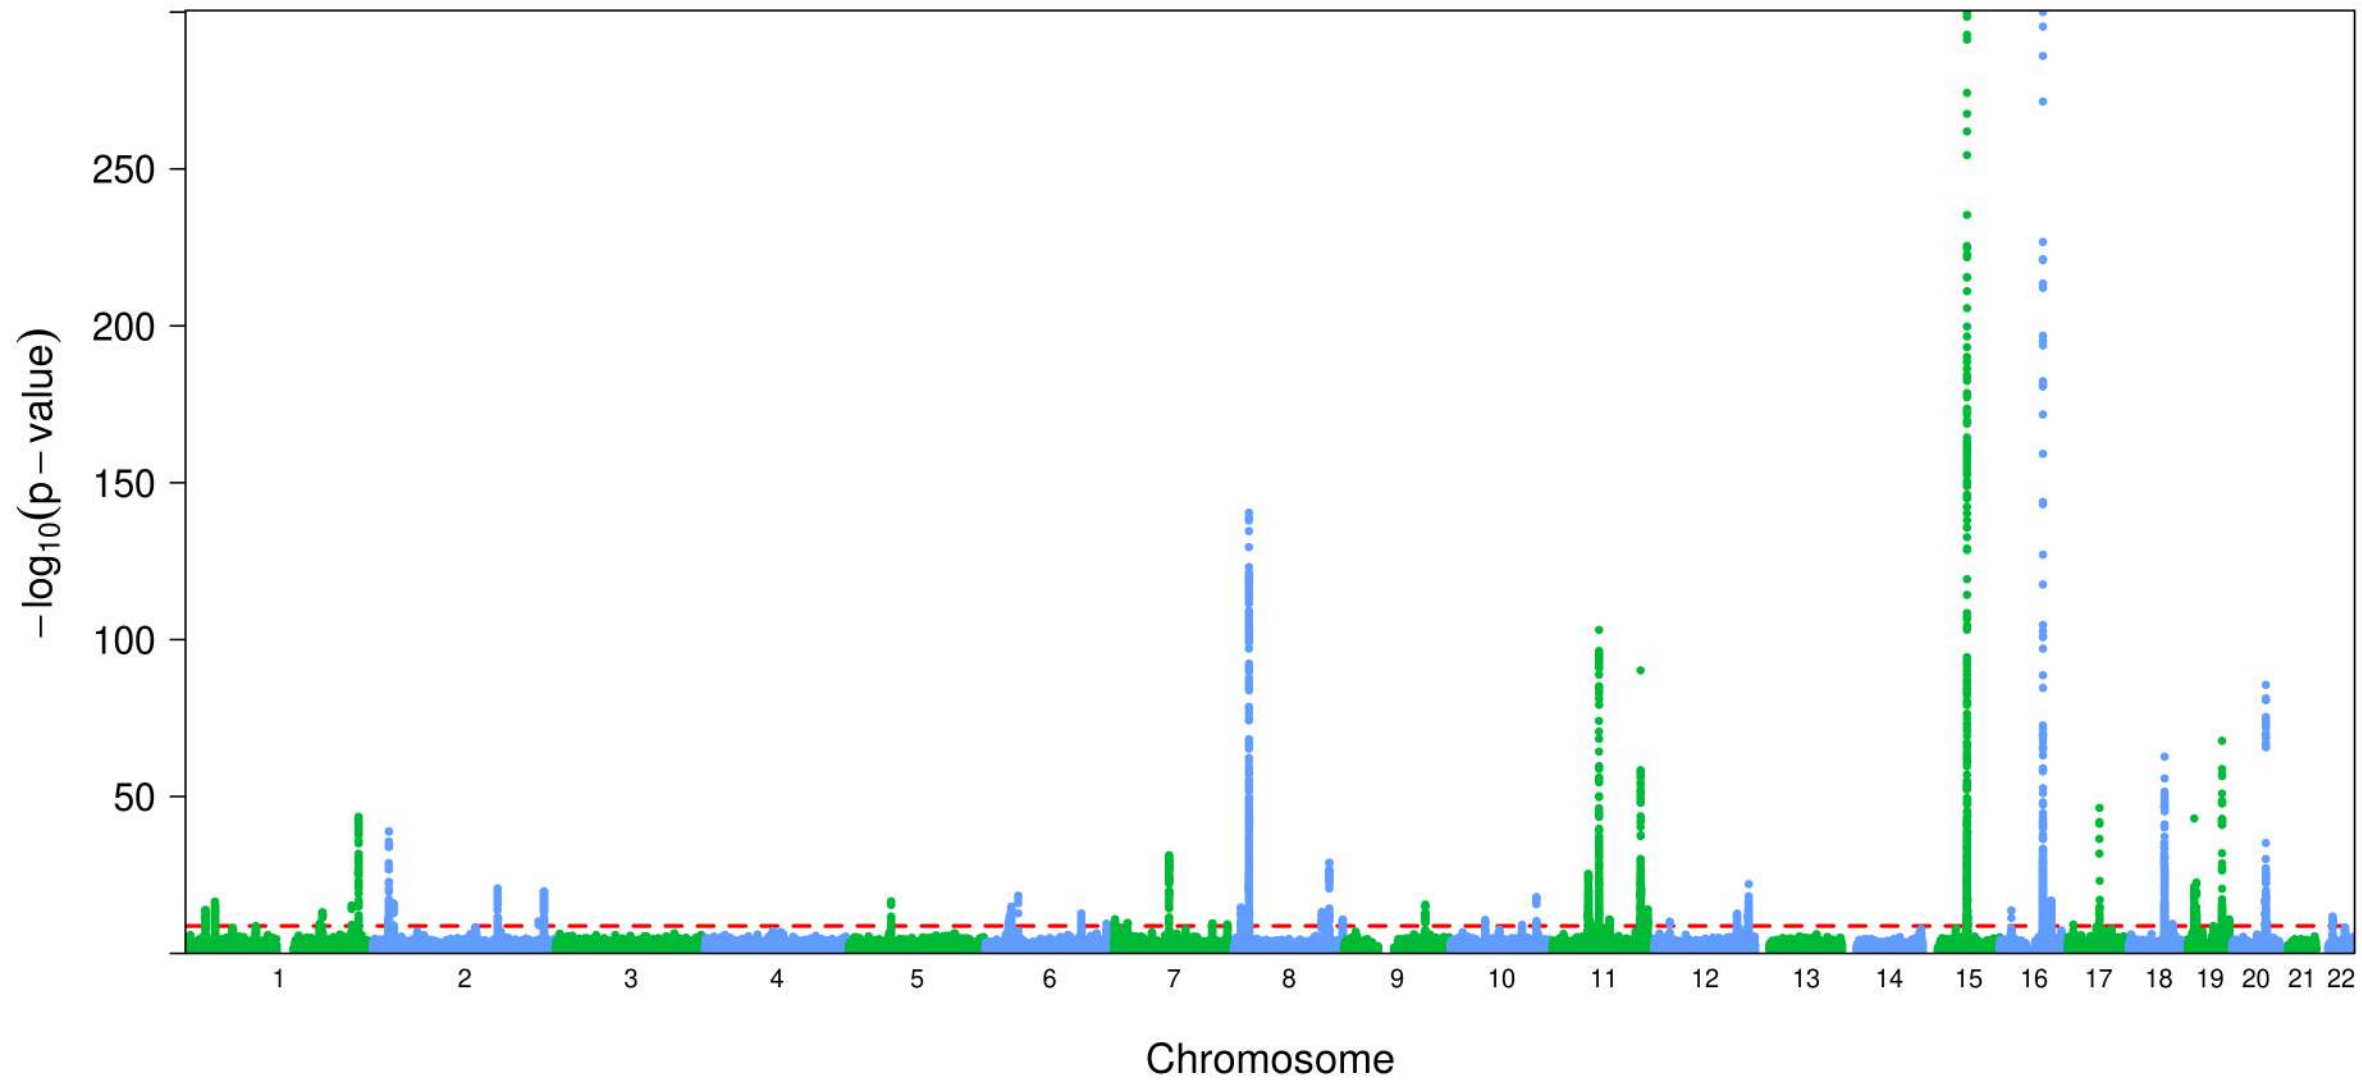

# L-HDL-P

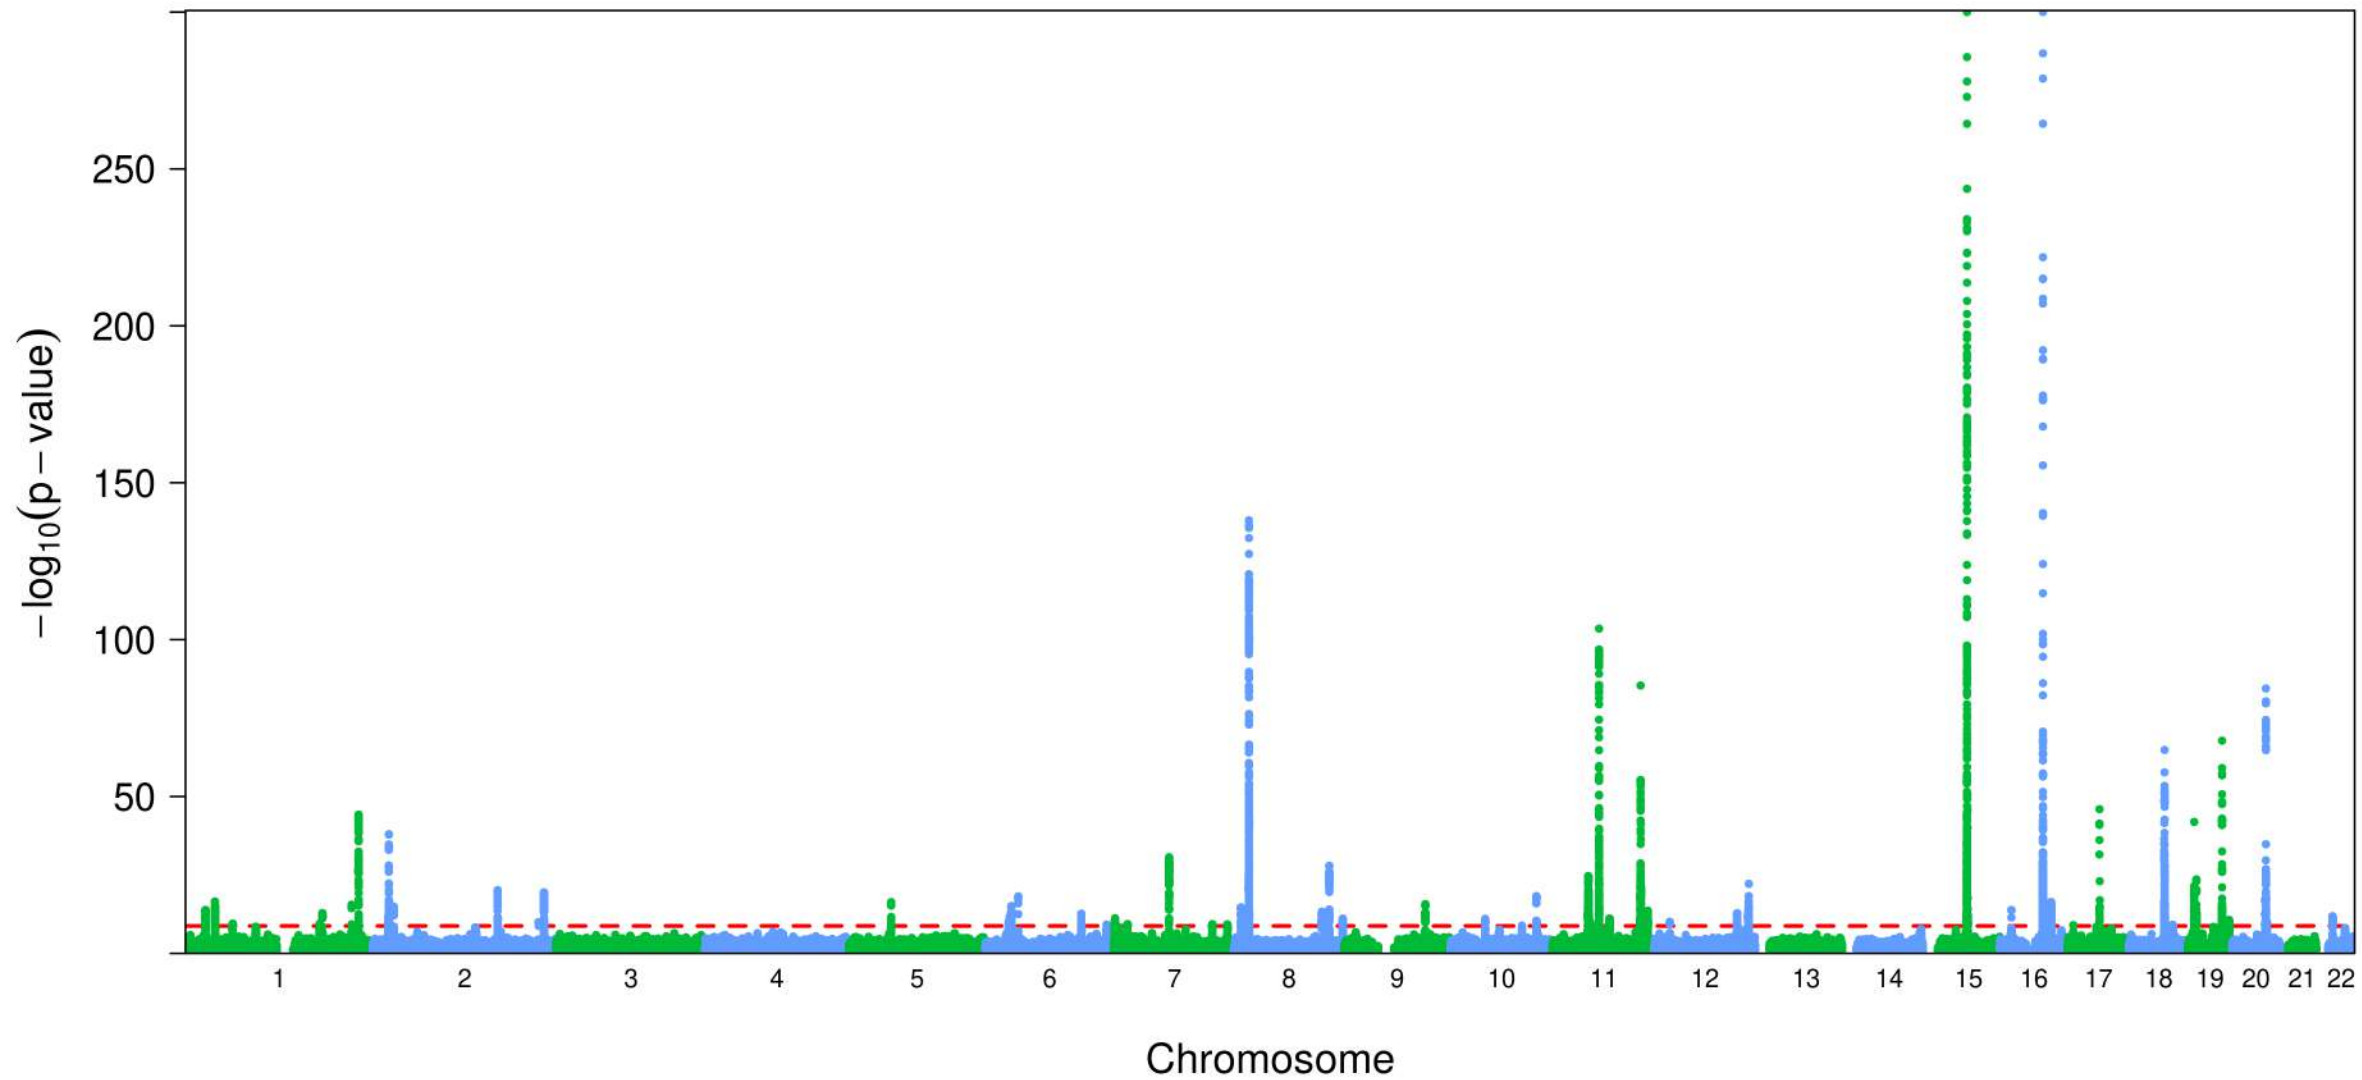

# L-HDL-PL

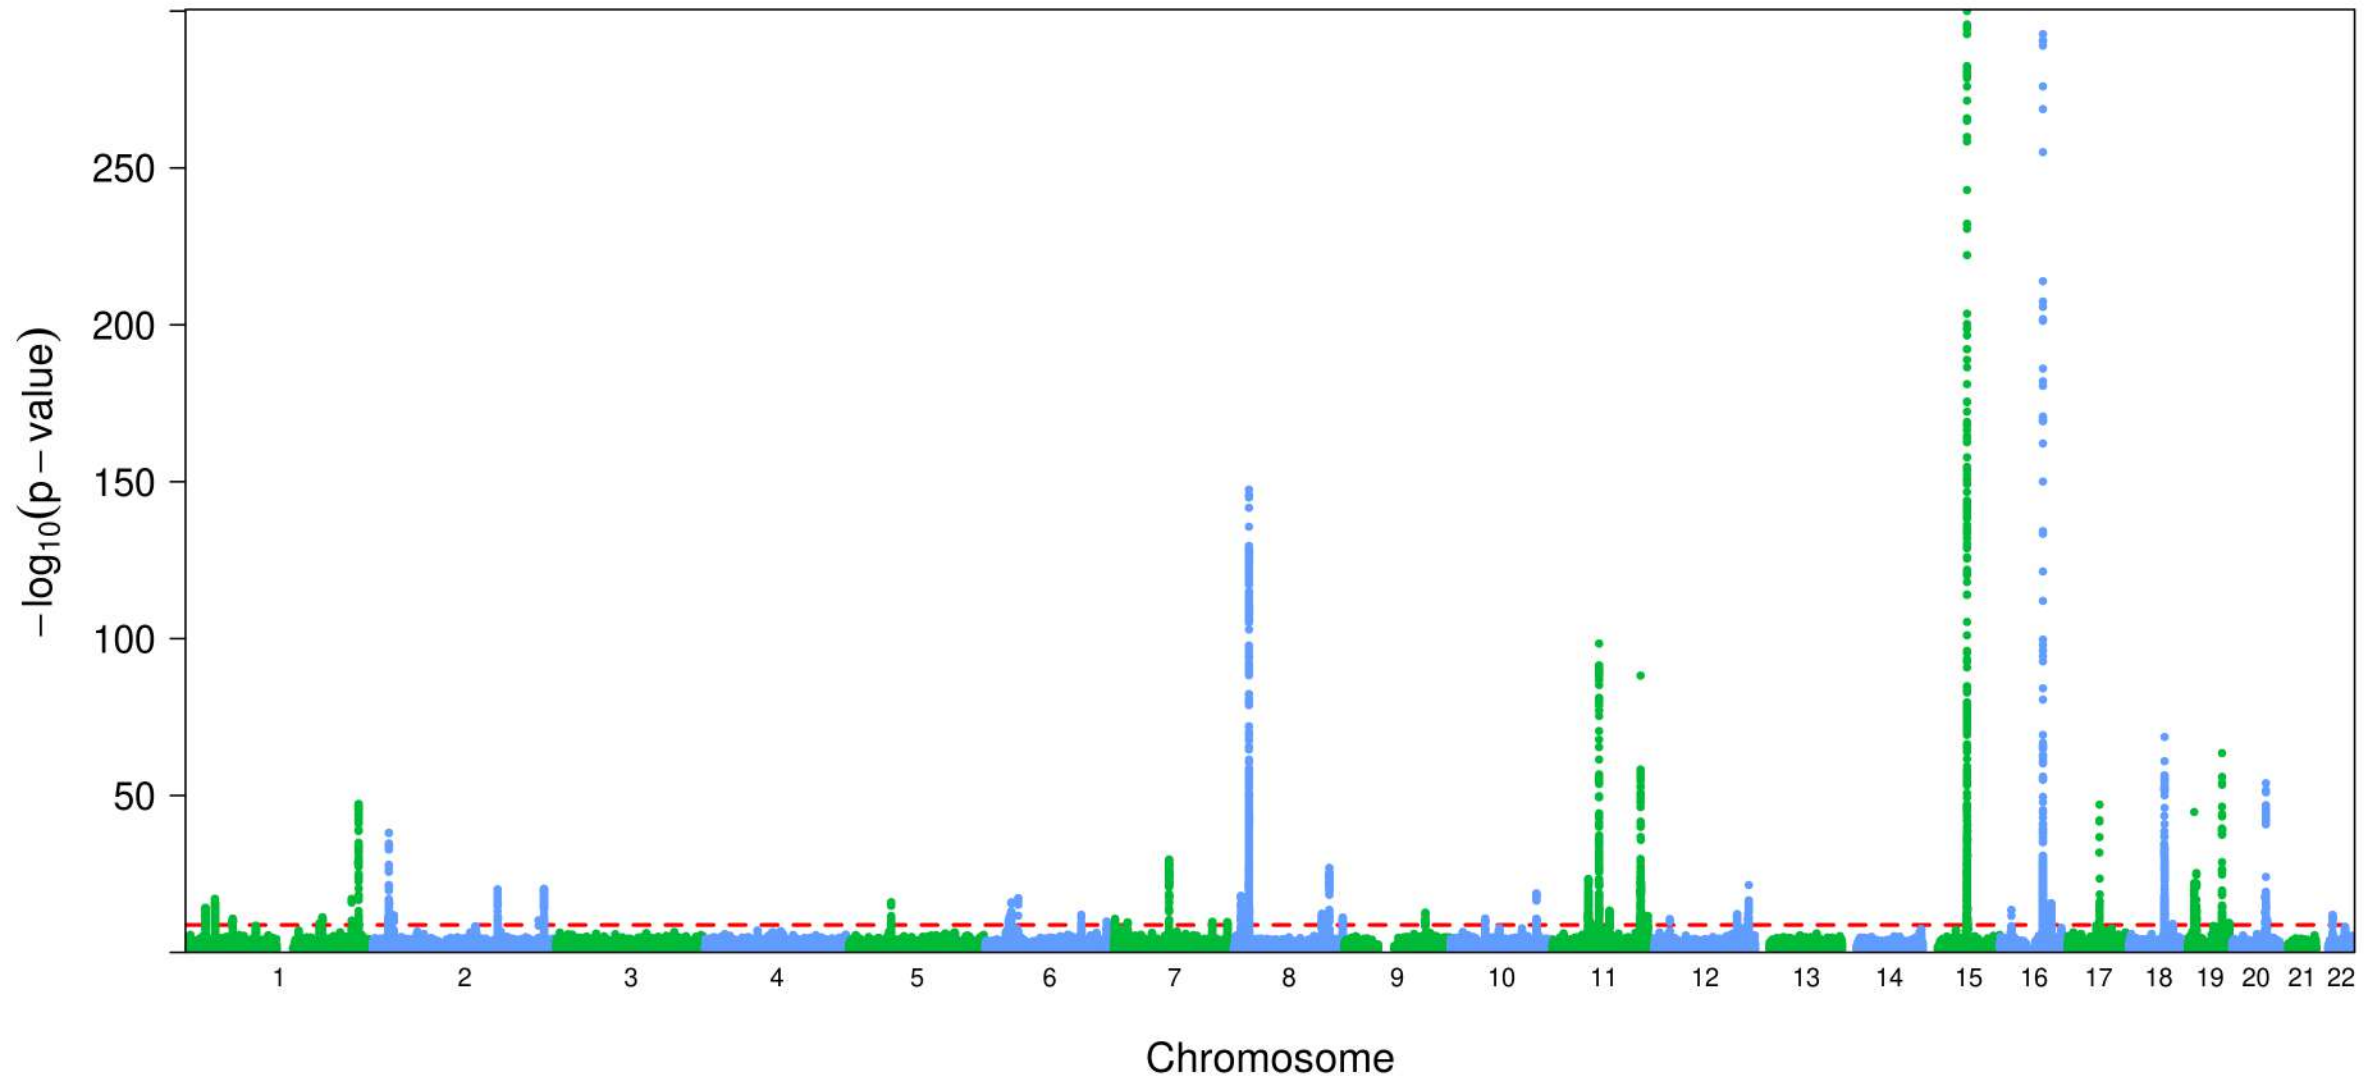



# L-HDL-PL\_percent

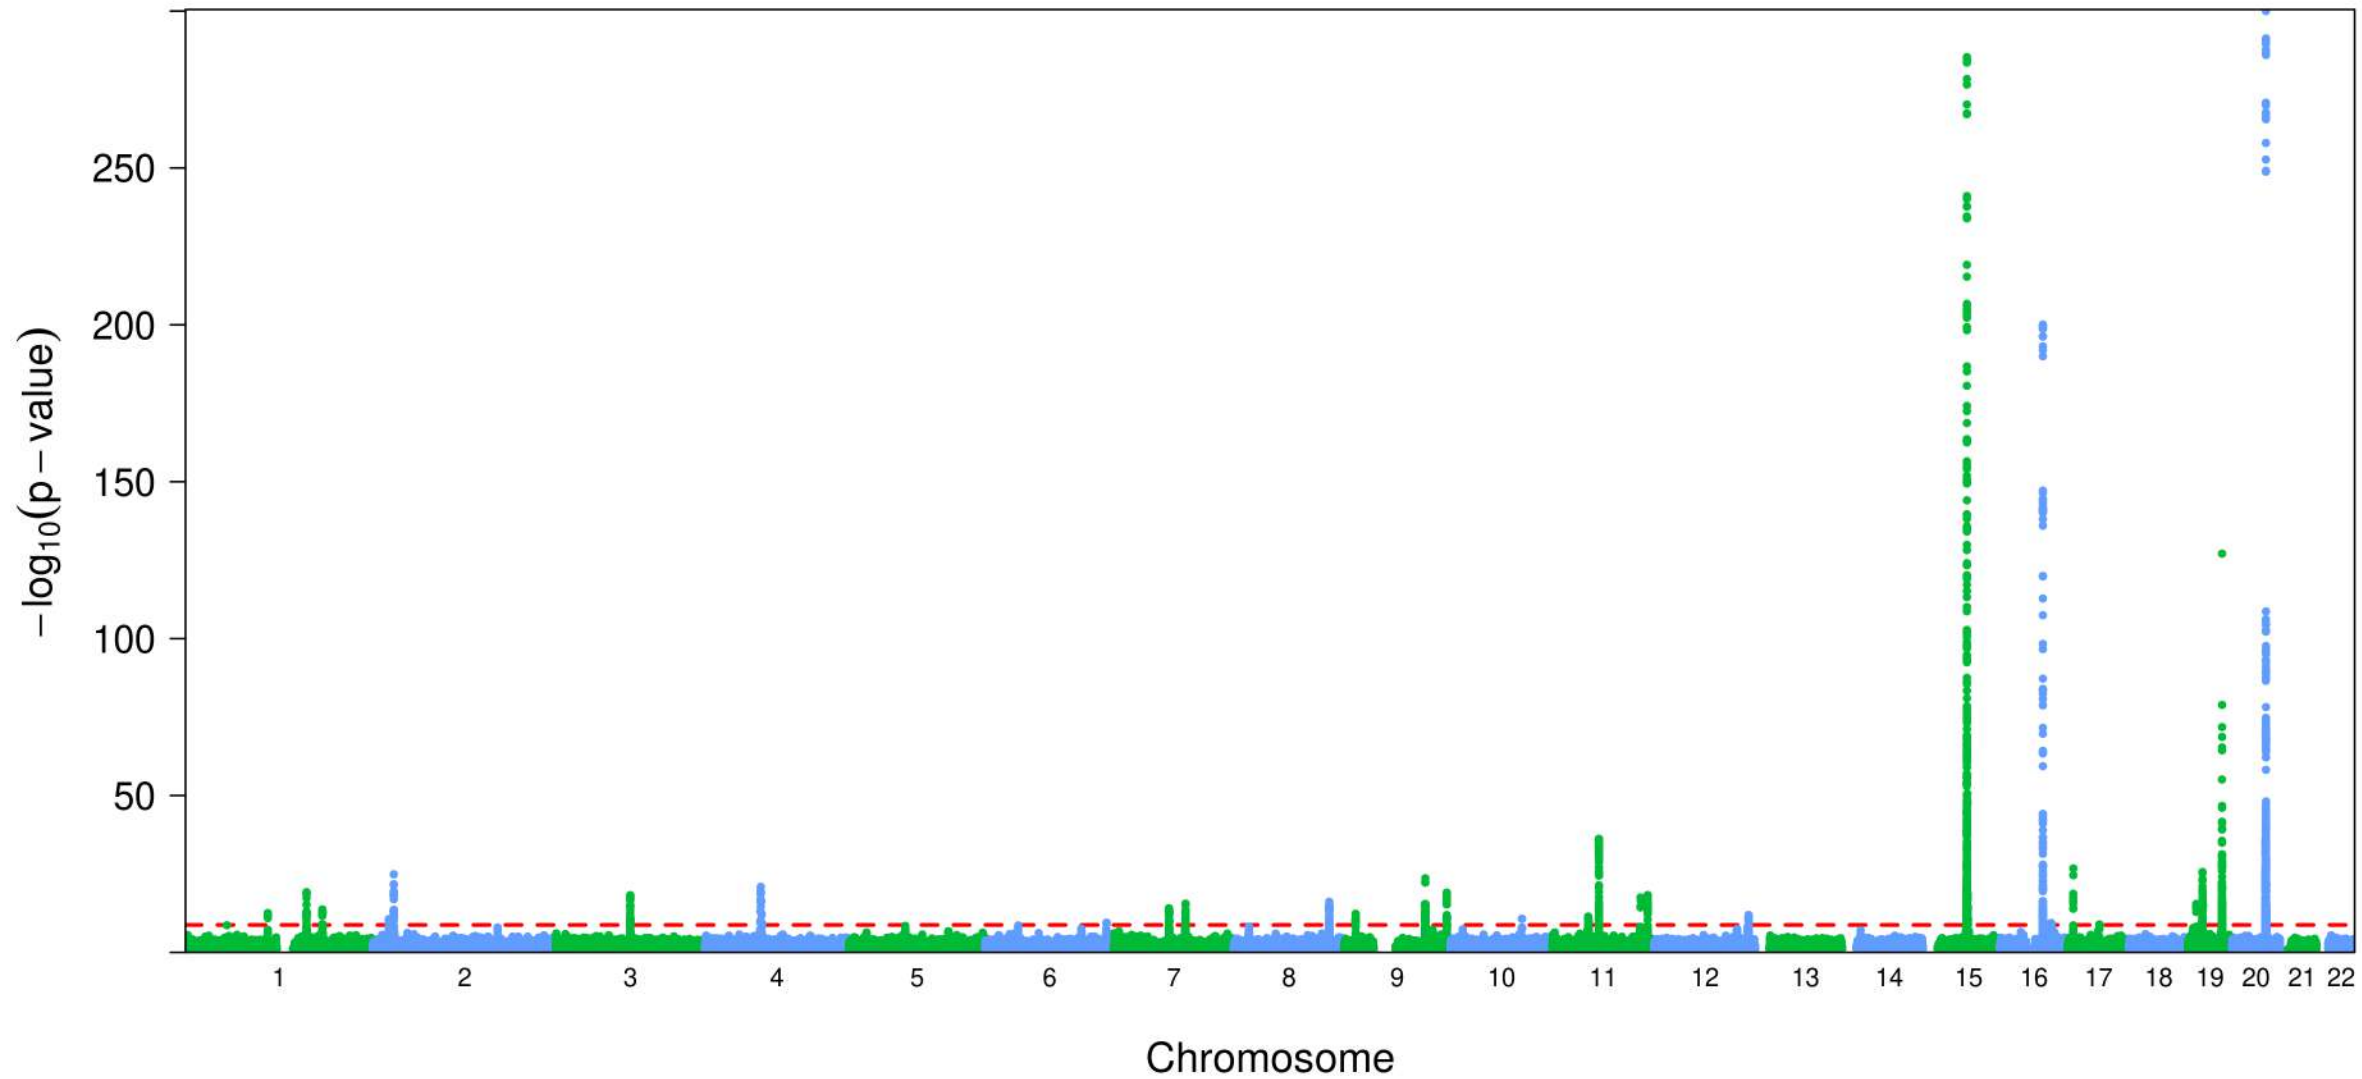

# L-HDL-TG

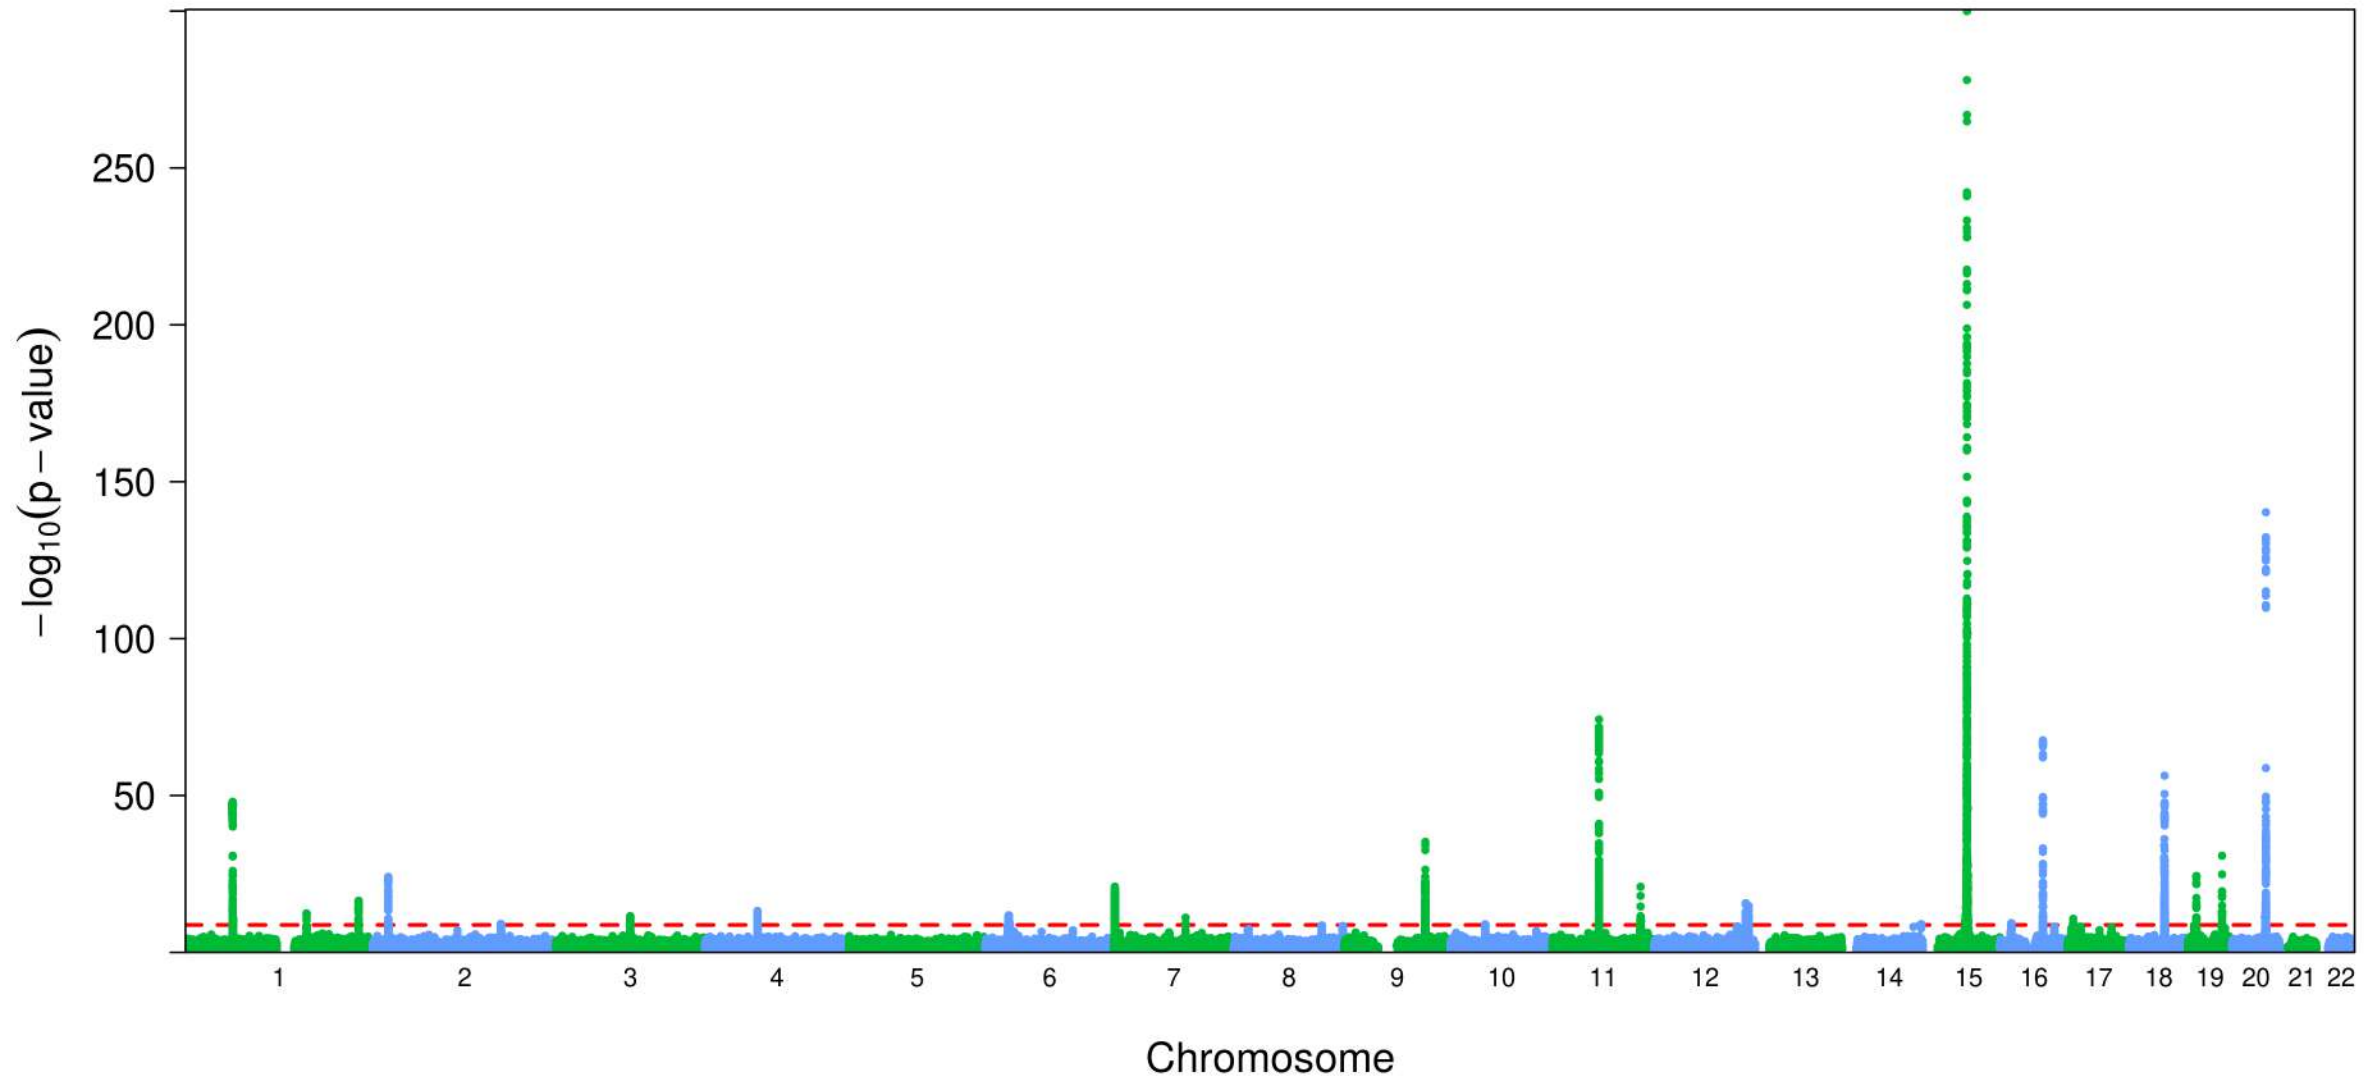

# L-HDL-TG\_percent

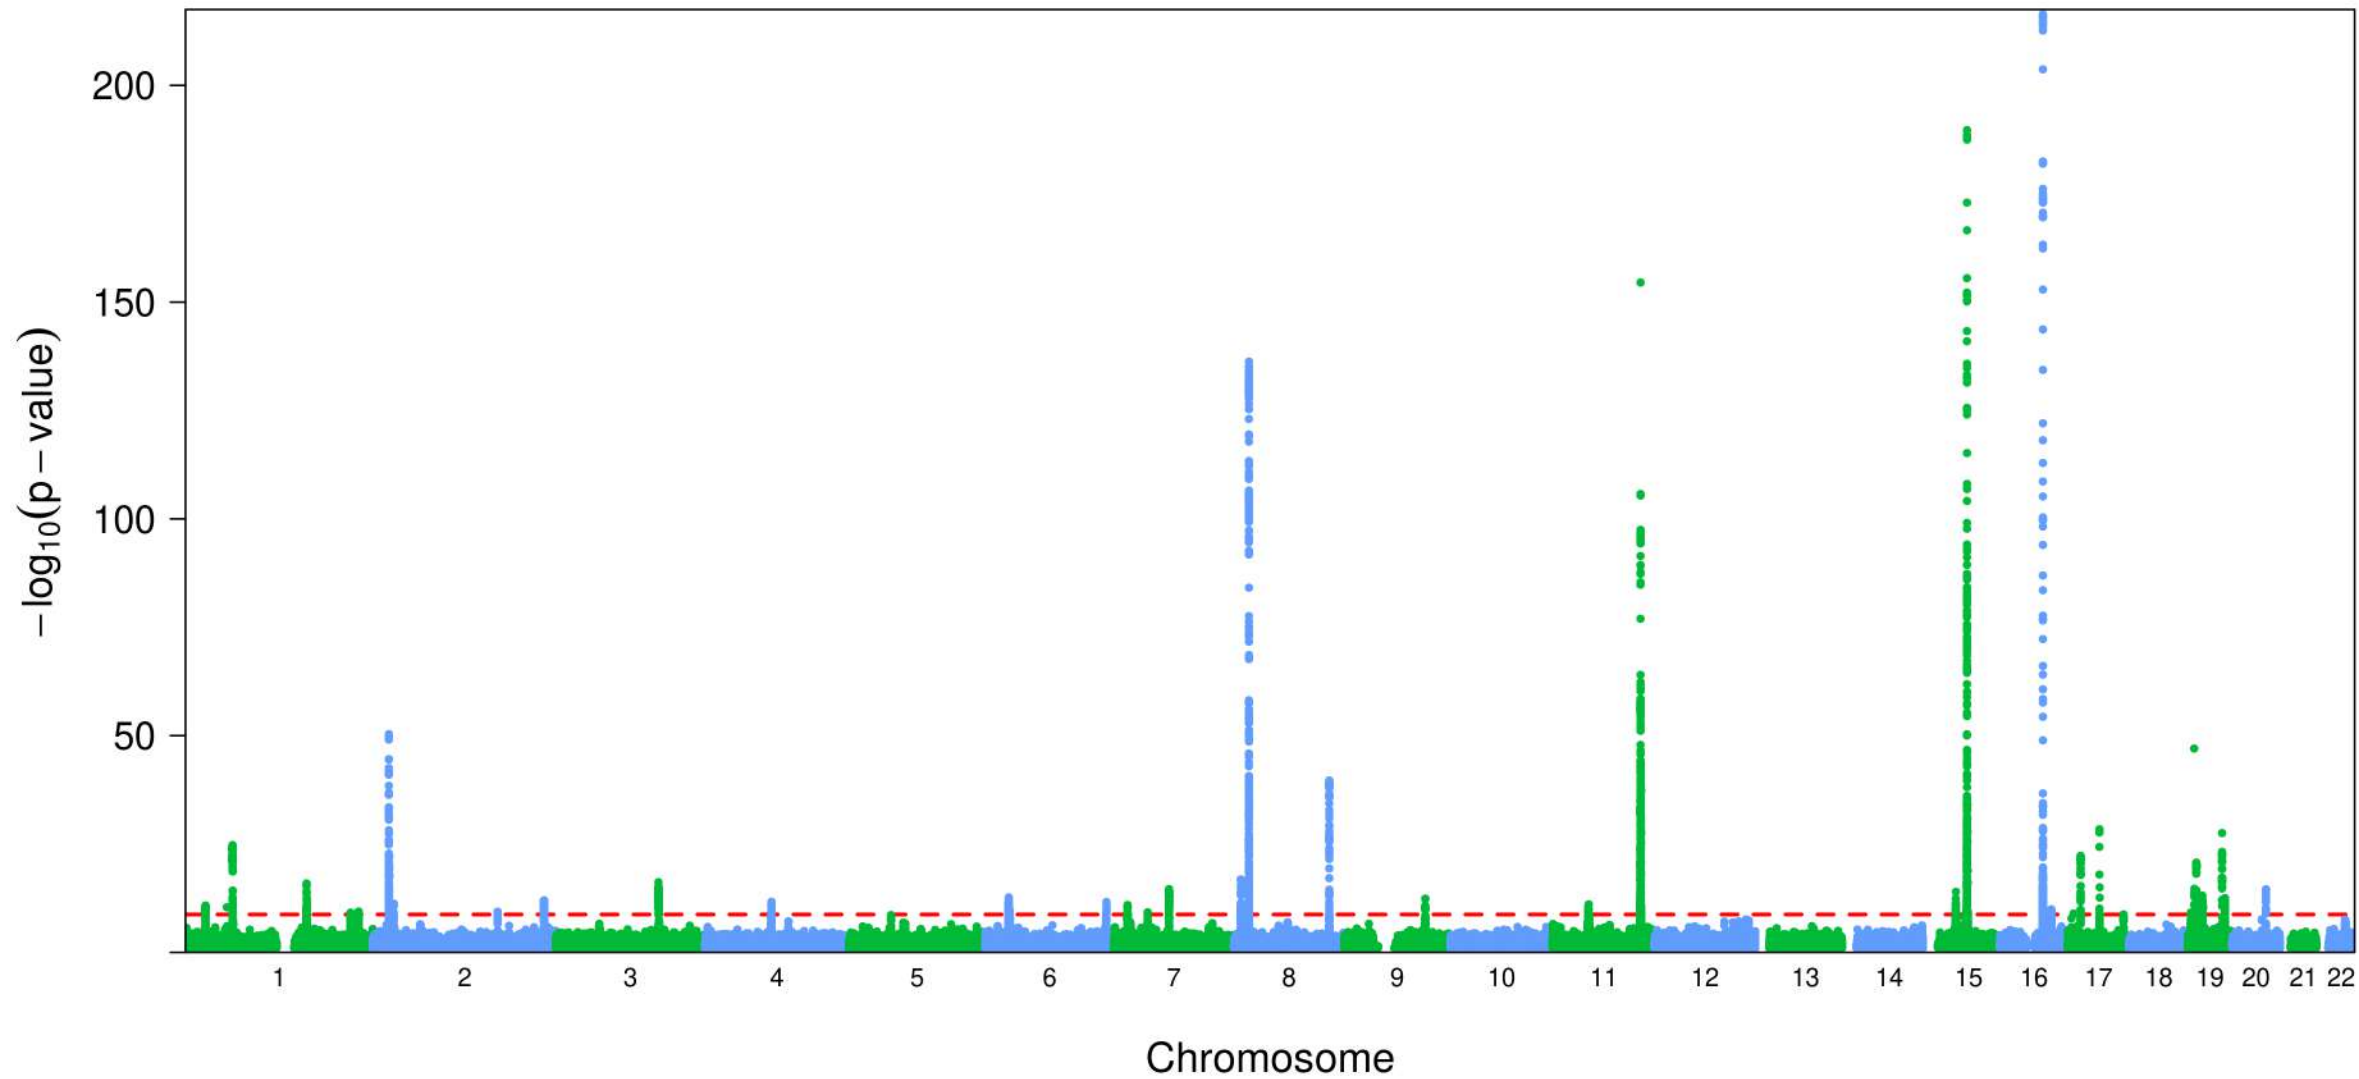

# L-LDL-C

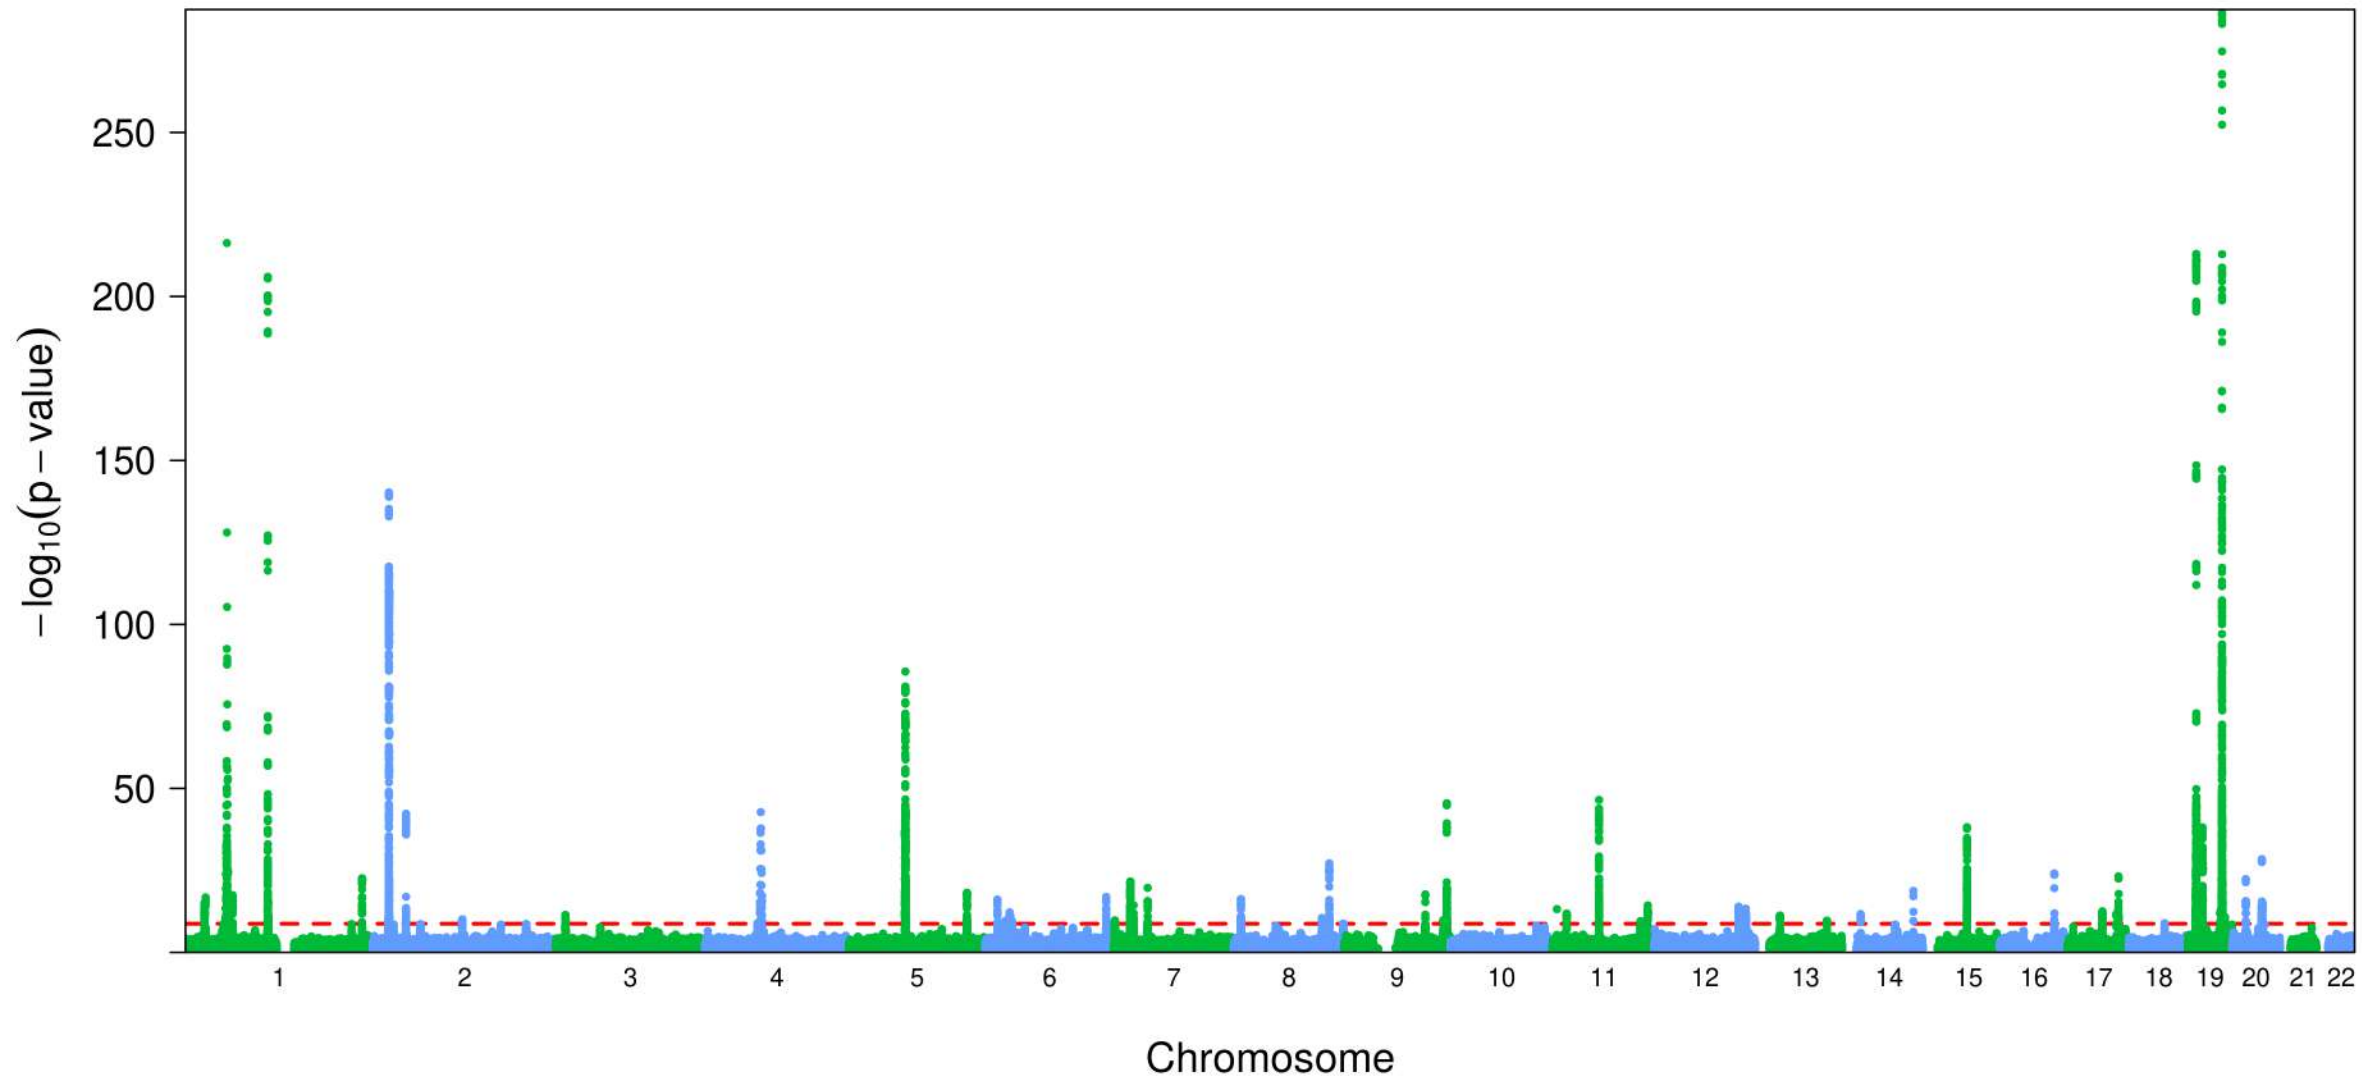

# L-LDL-C\_percent

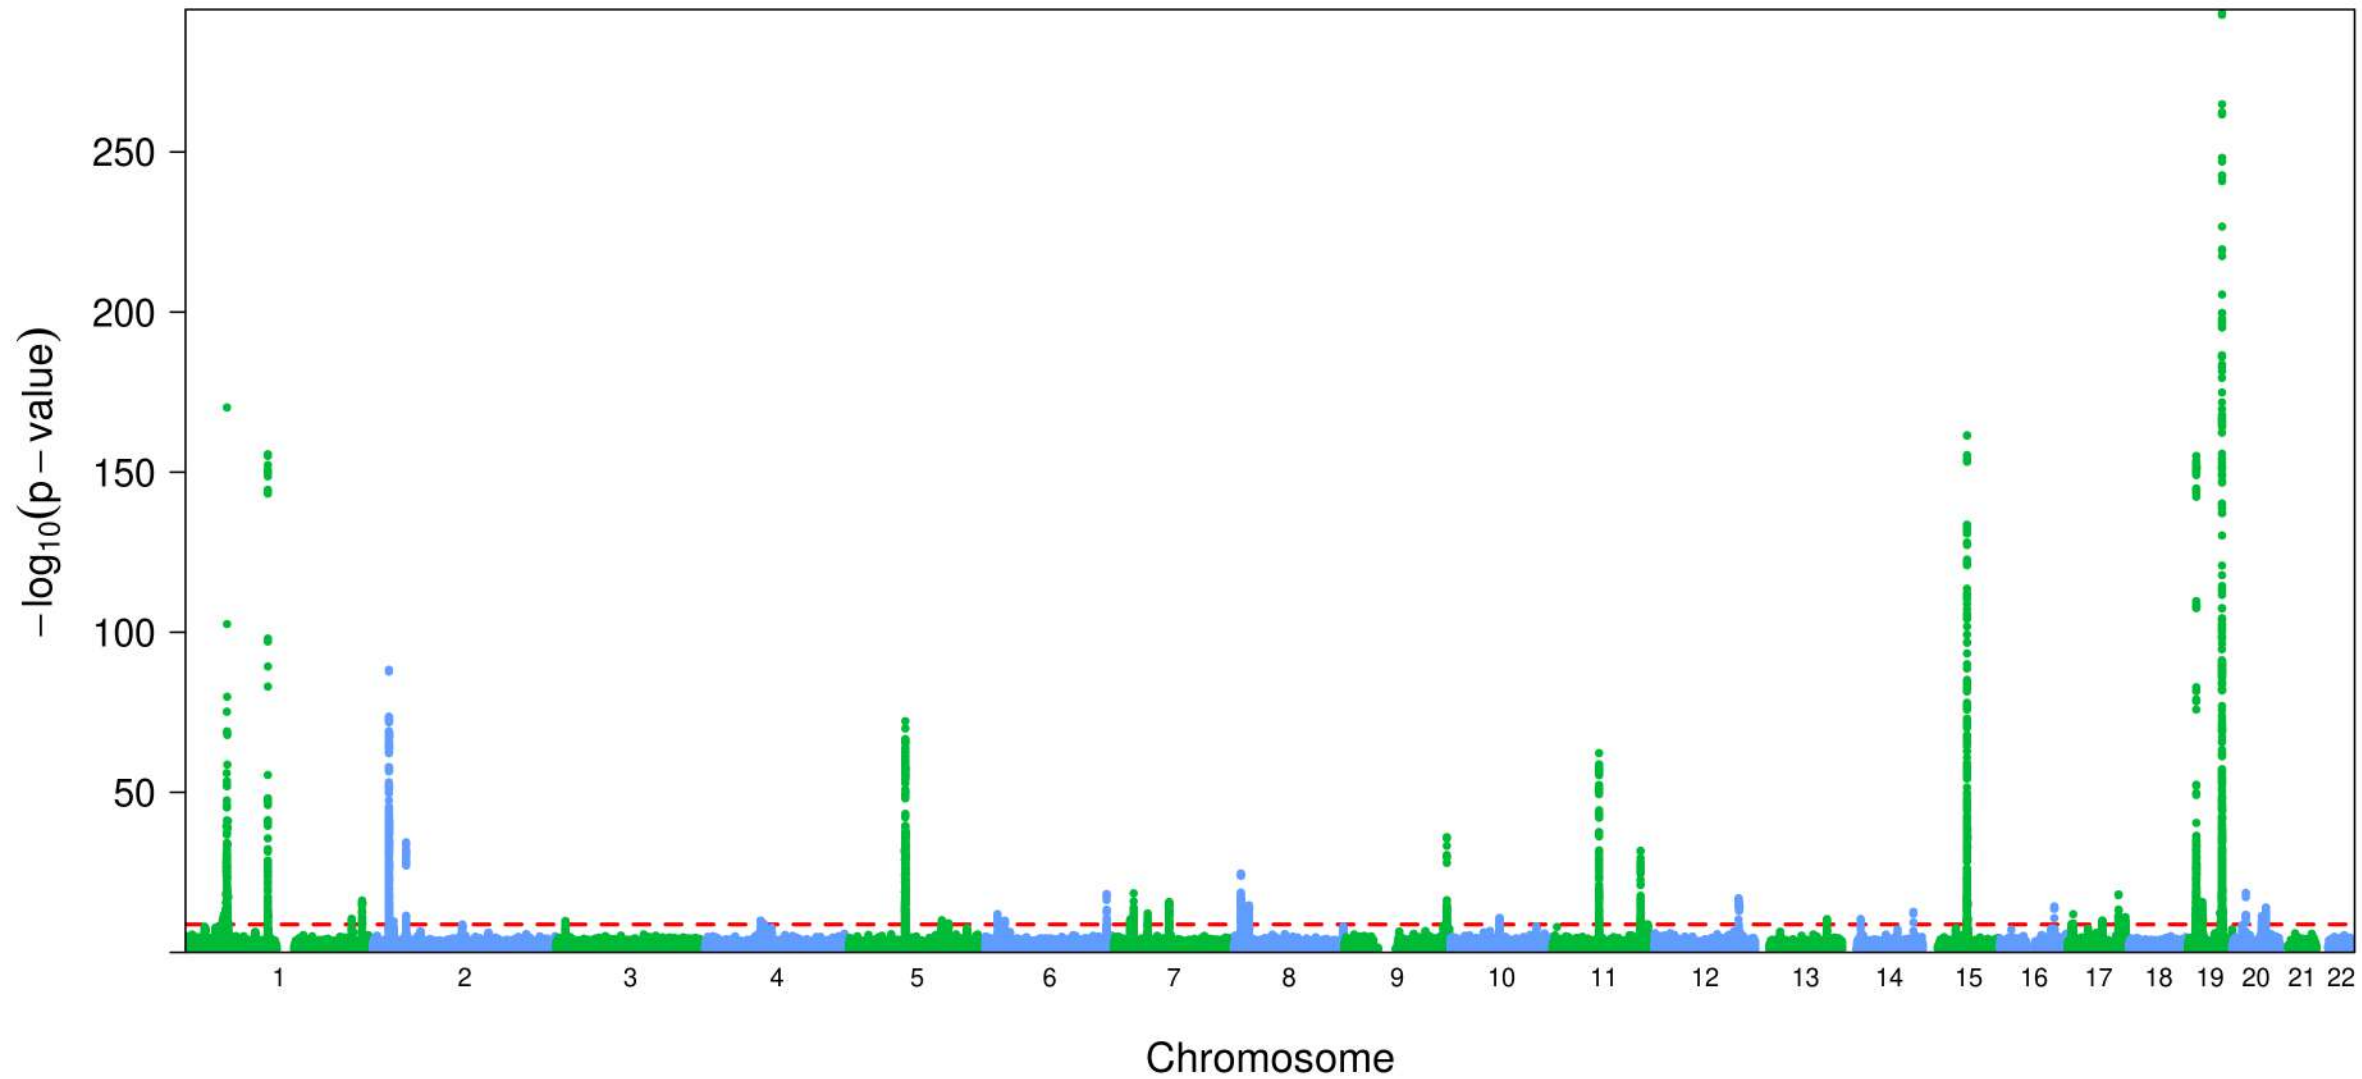

# L-LDL-CE

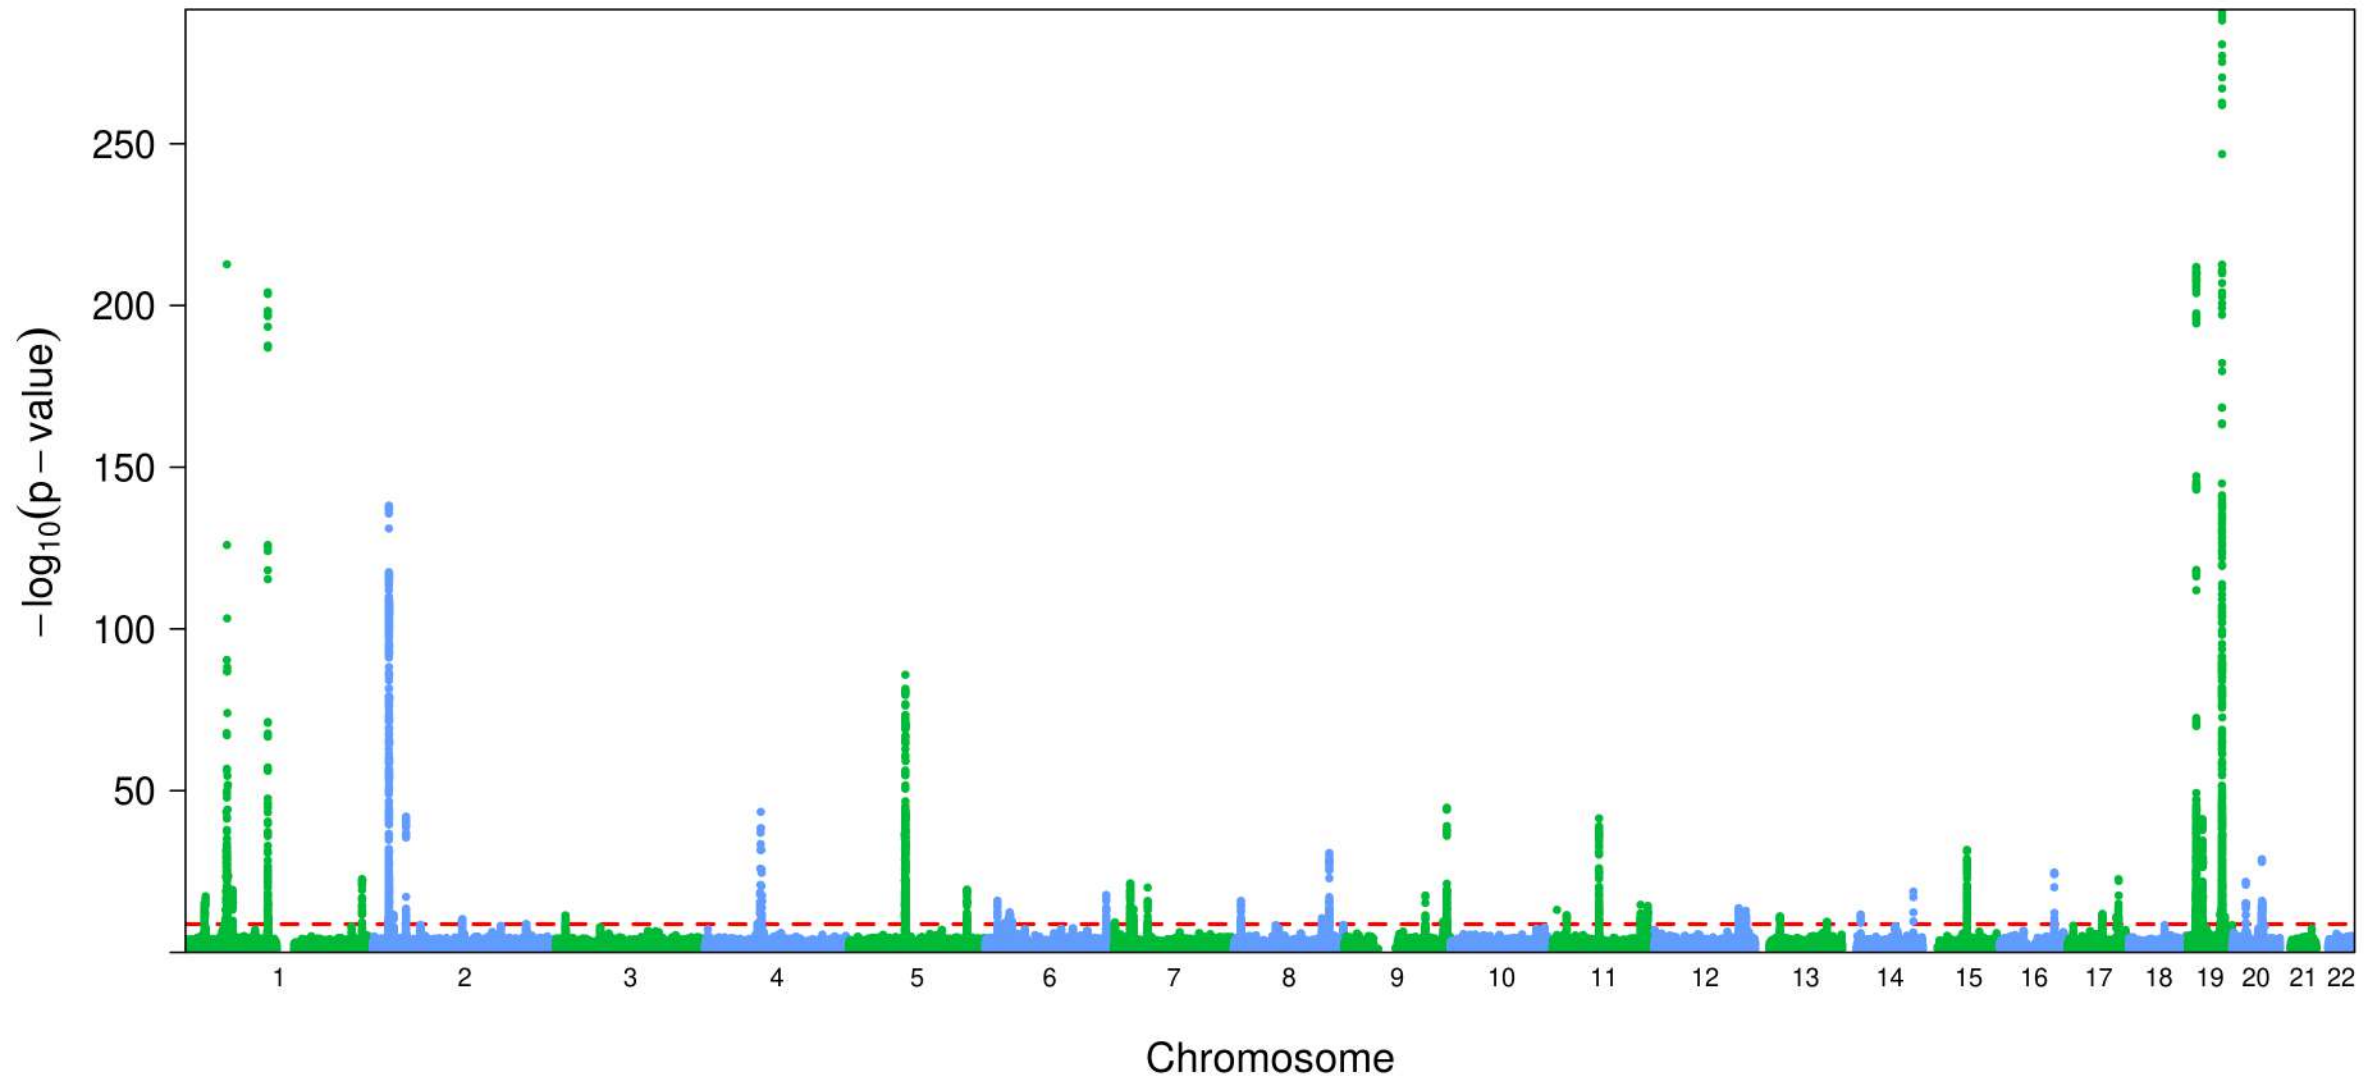

# L-LDL-CE\_percent

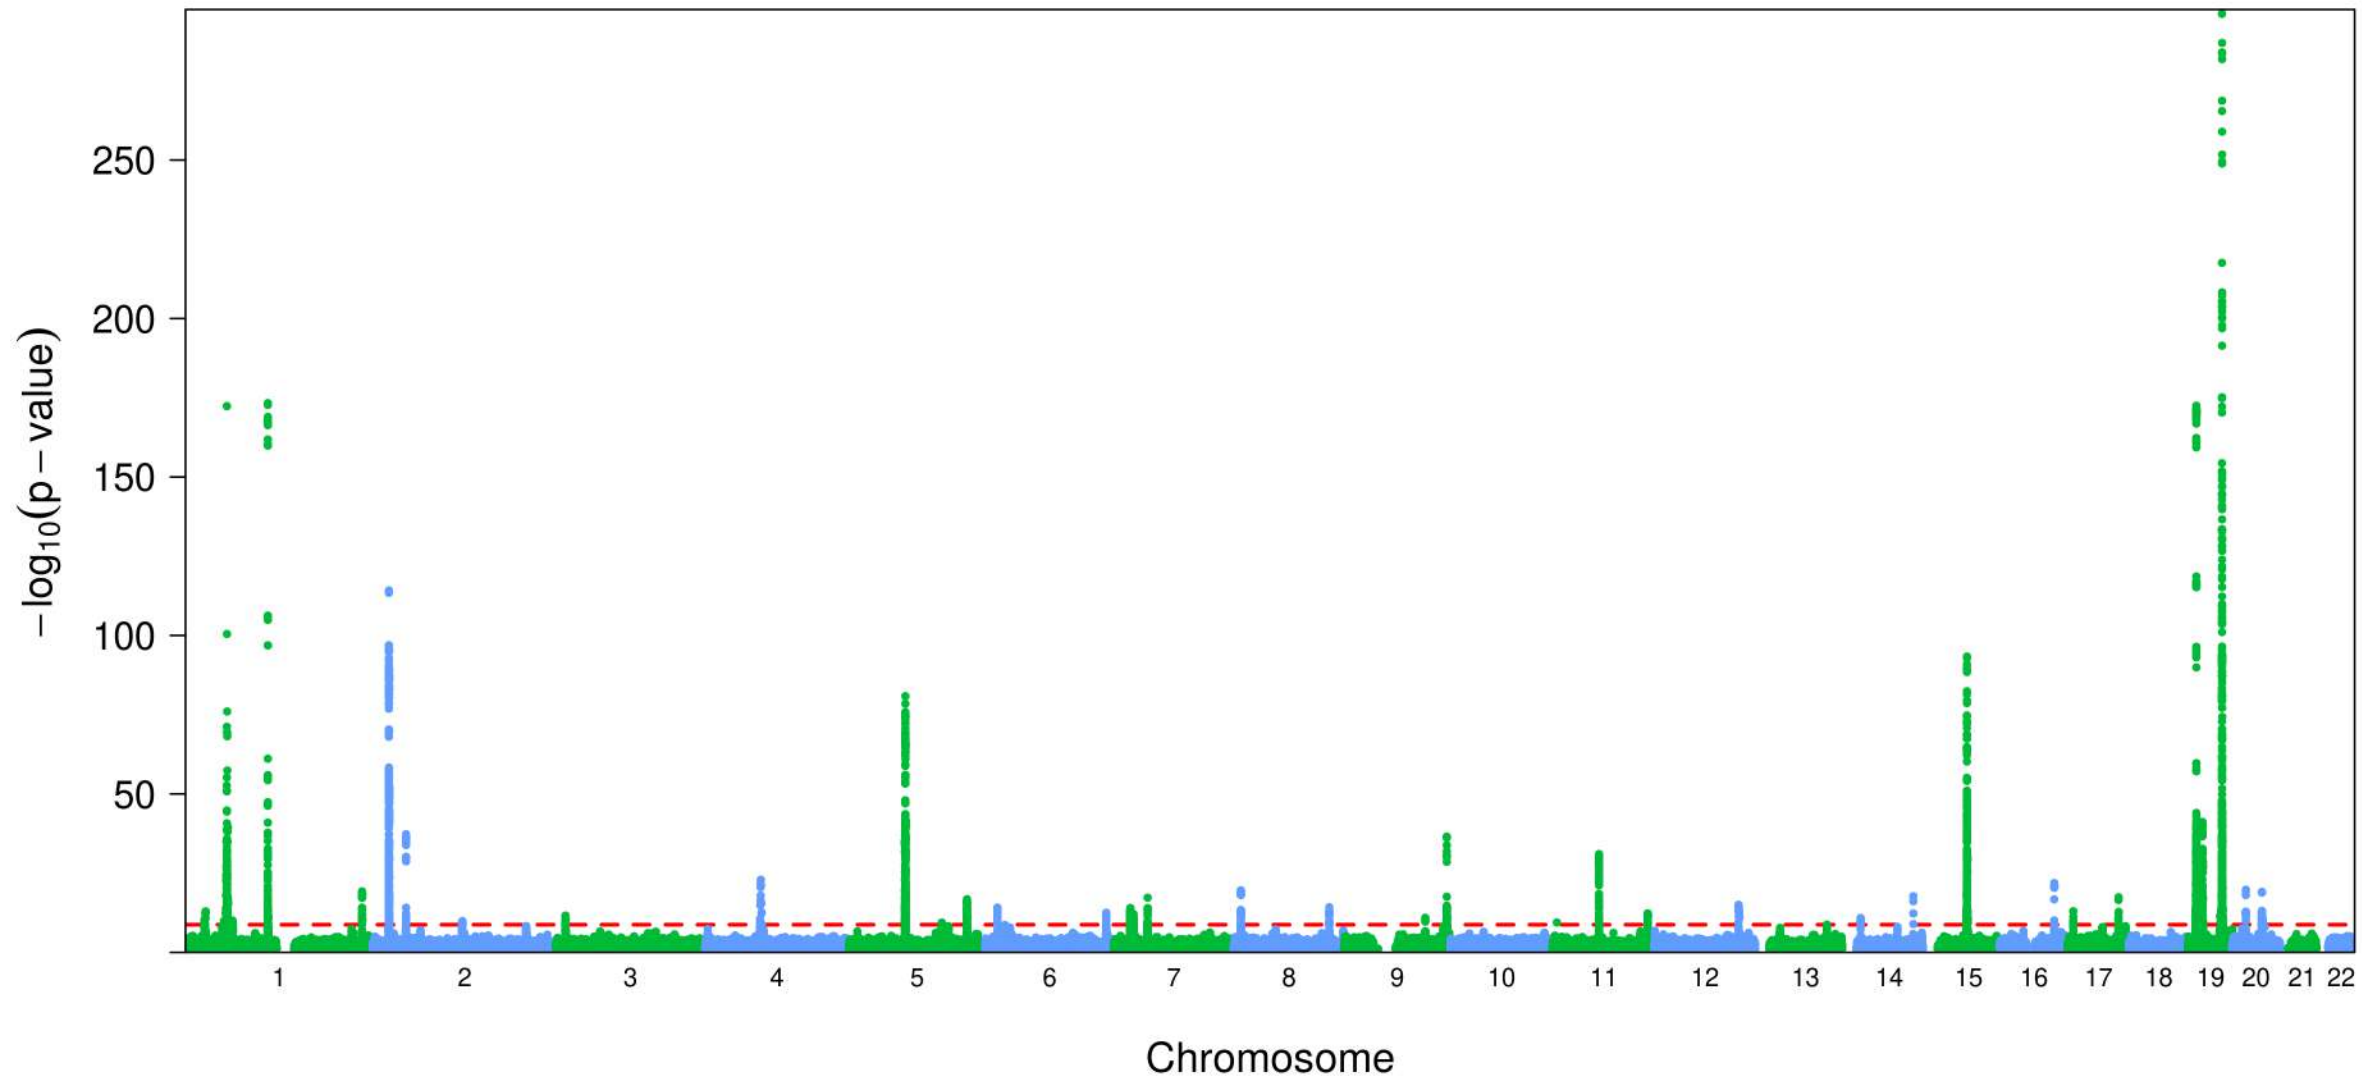

# L-LDL-FC

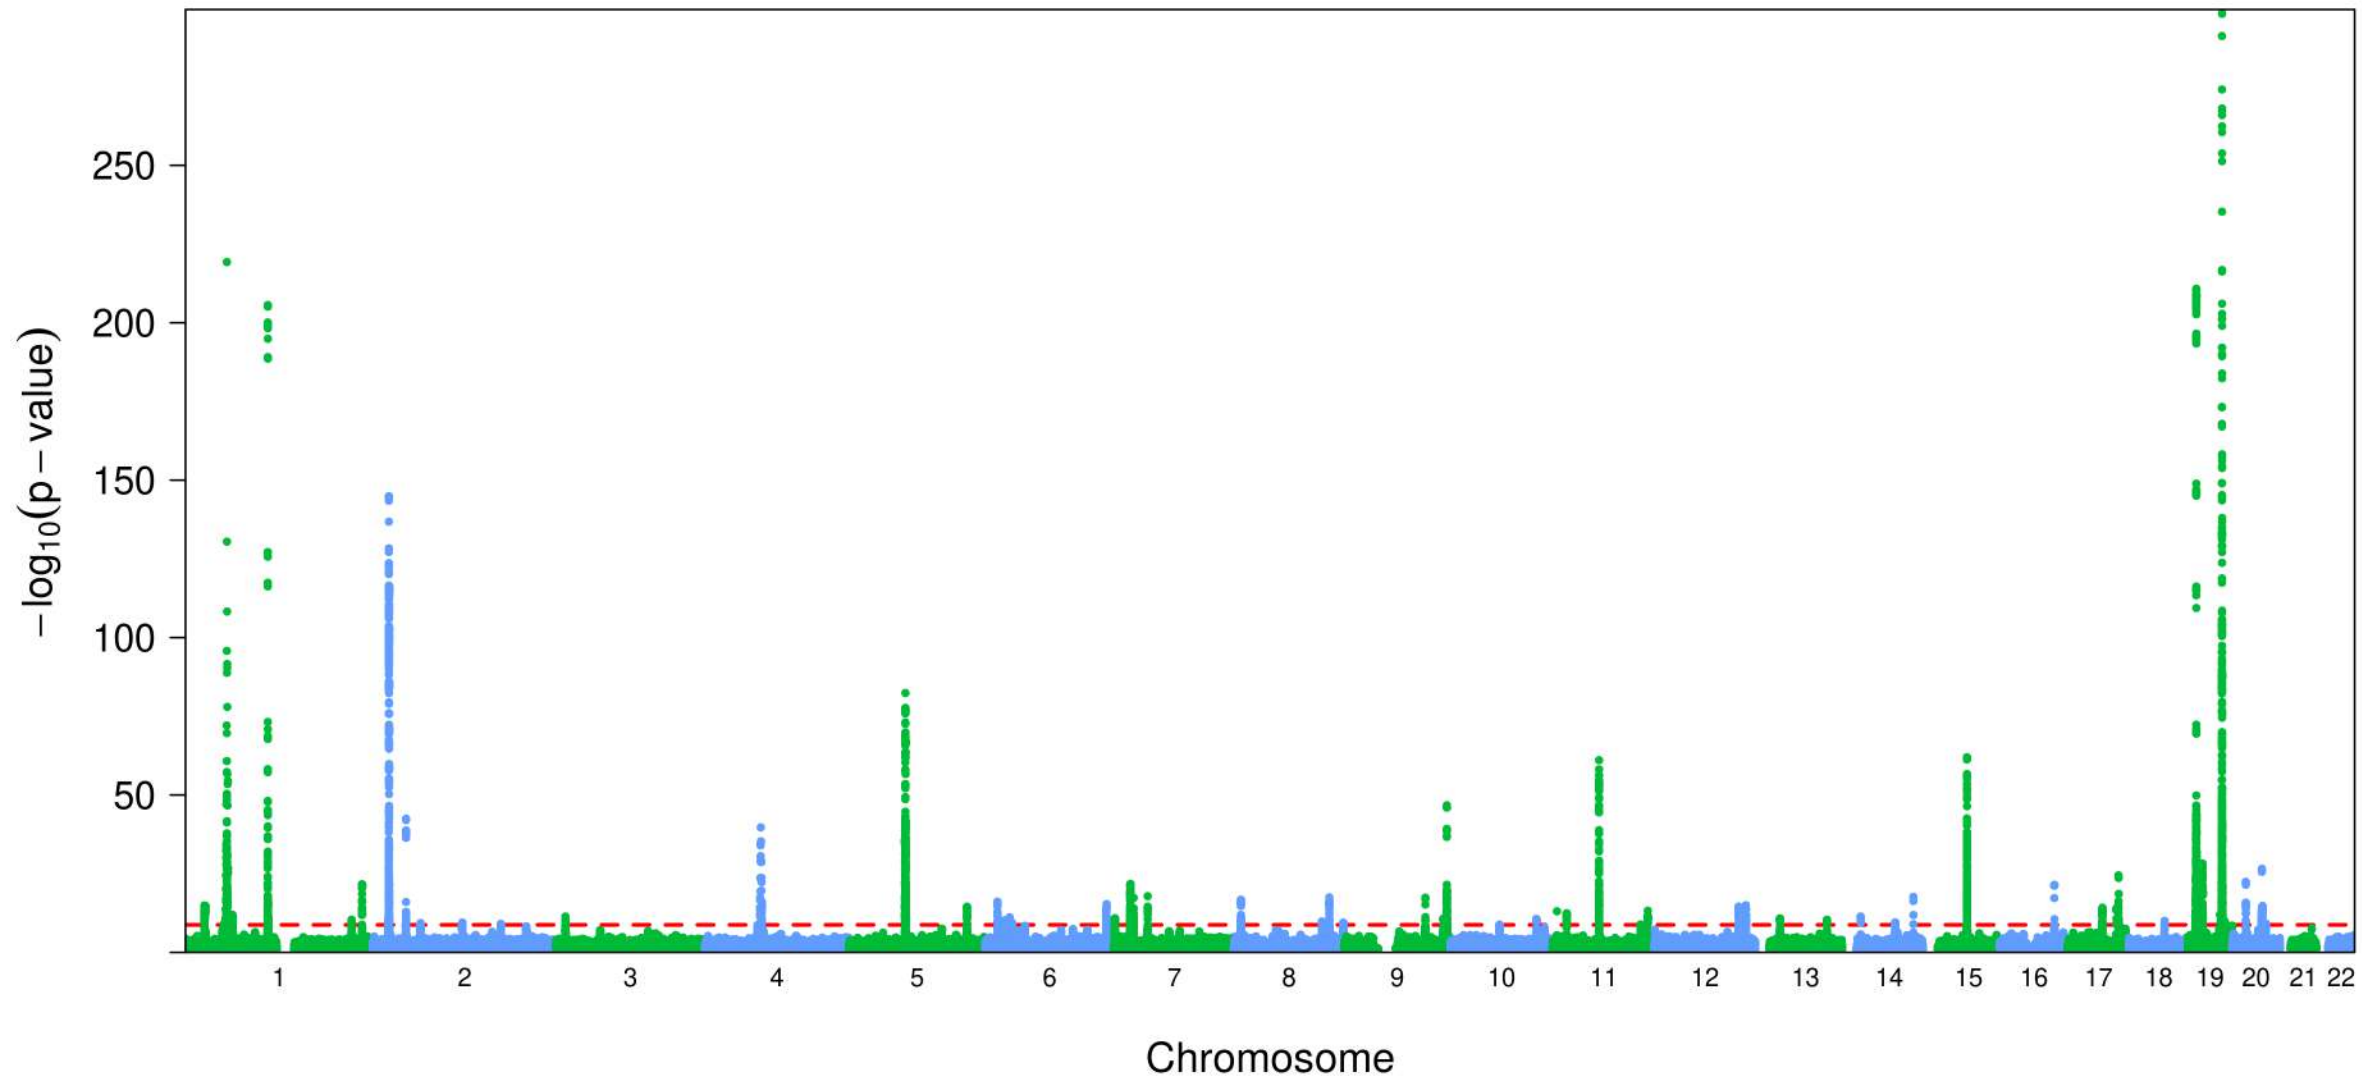



# L-LDL-FC\_percent

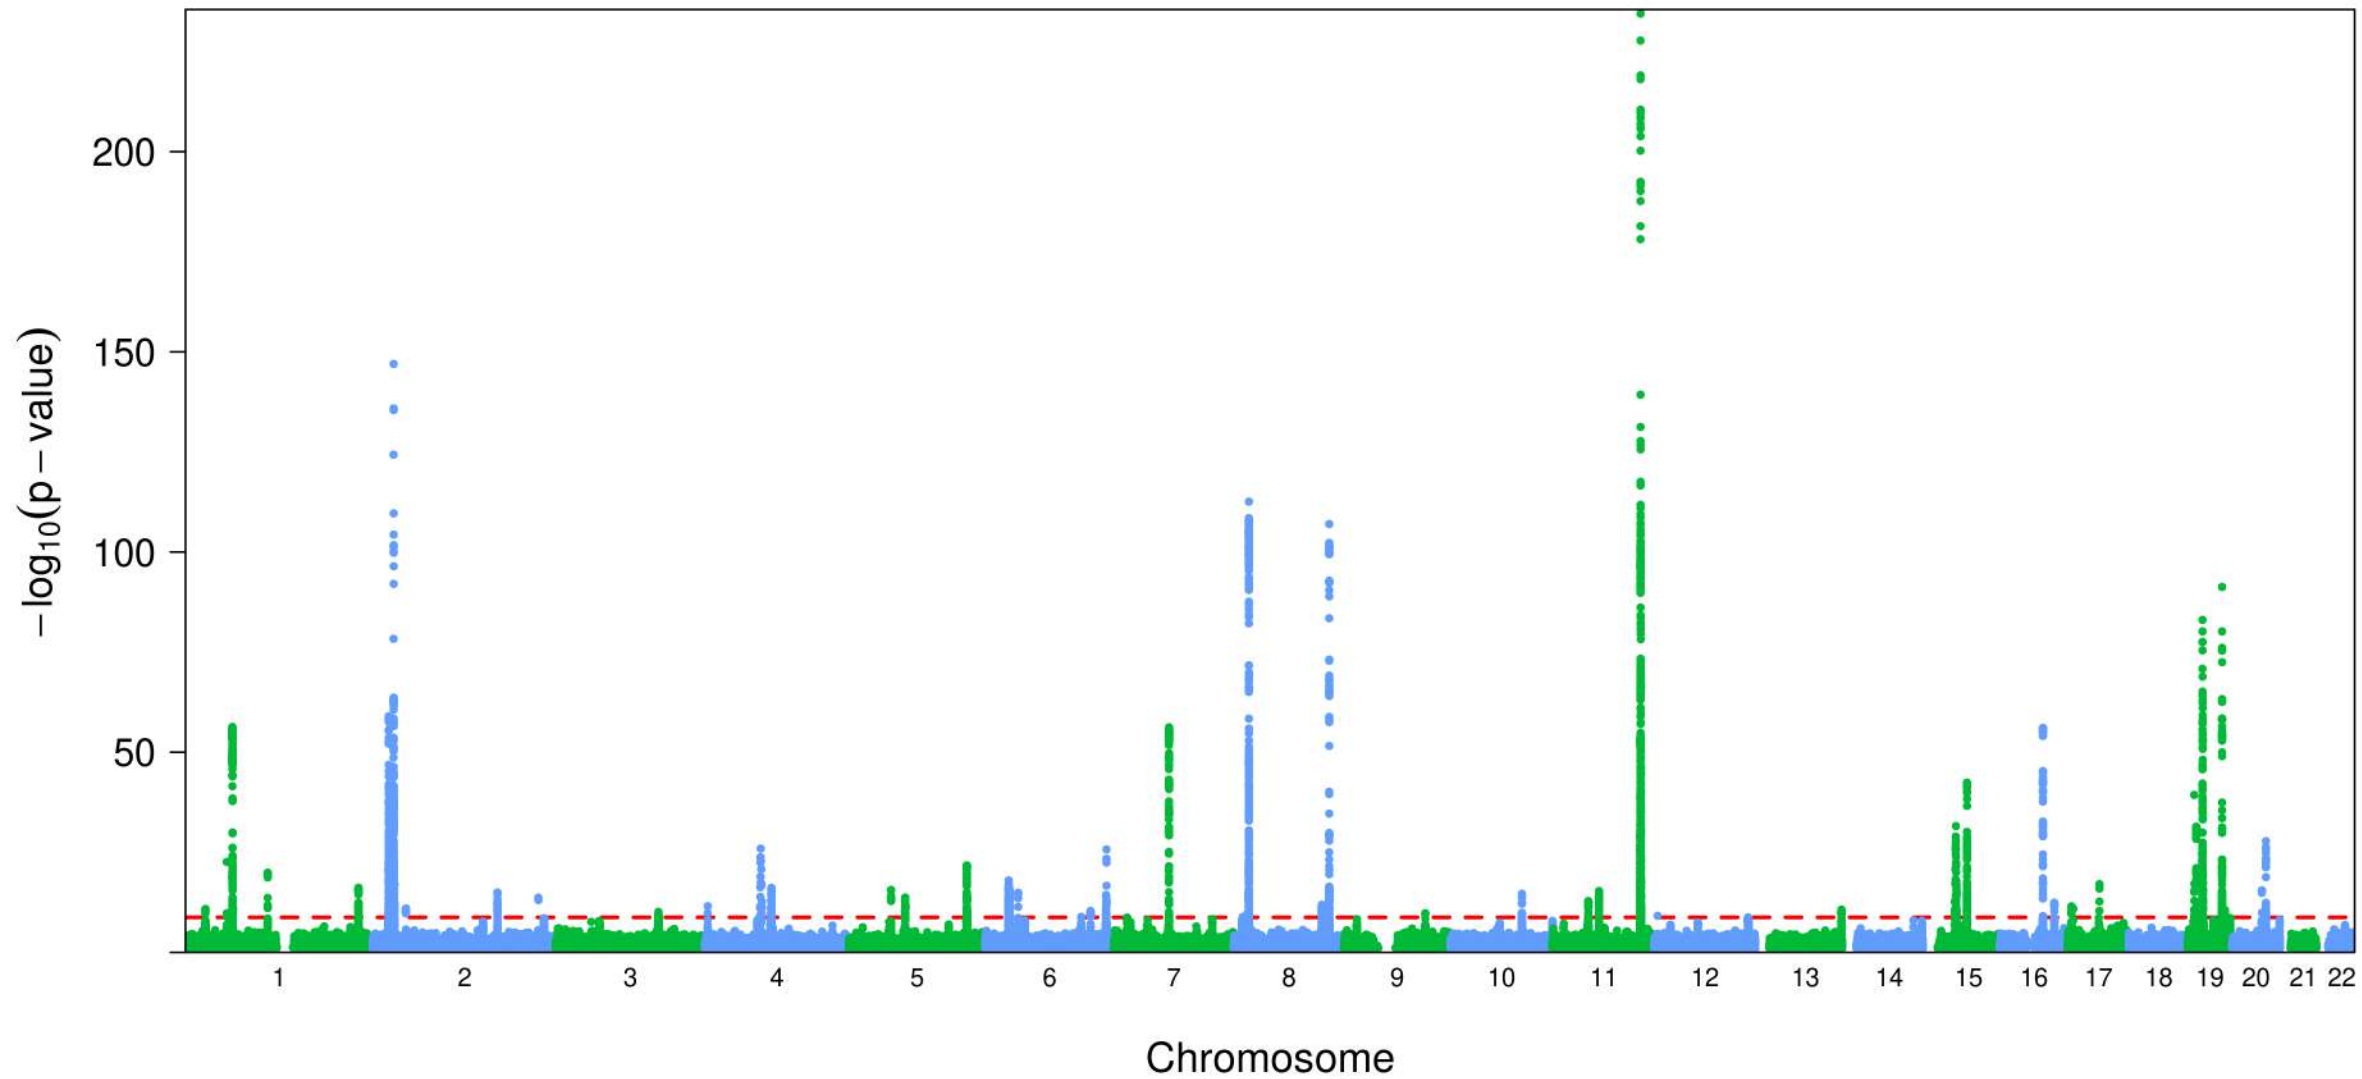

# L-LDL-L

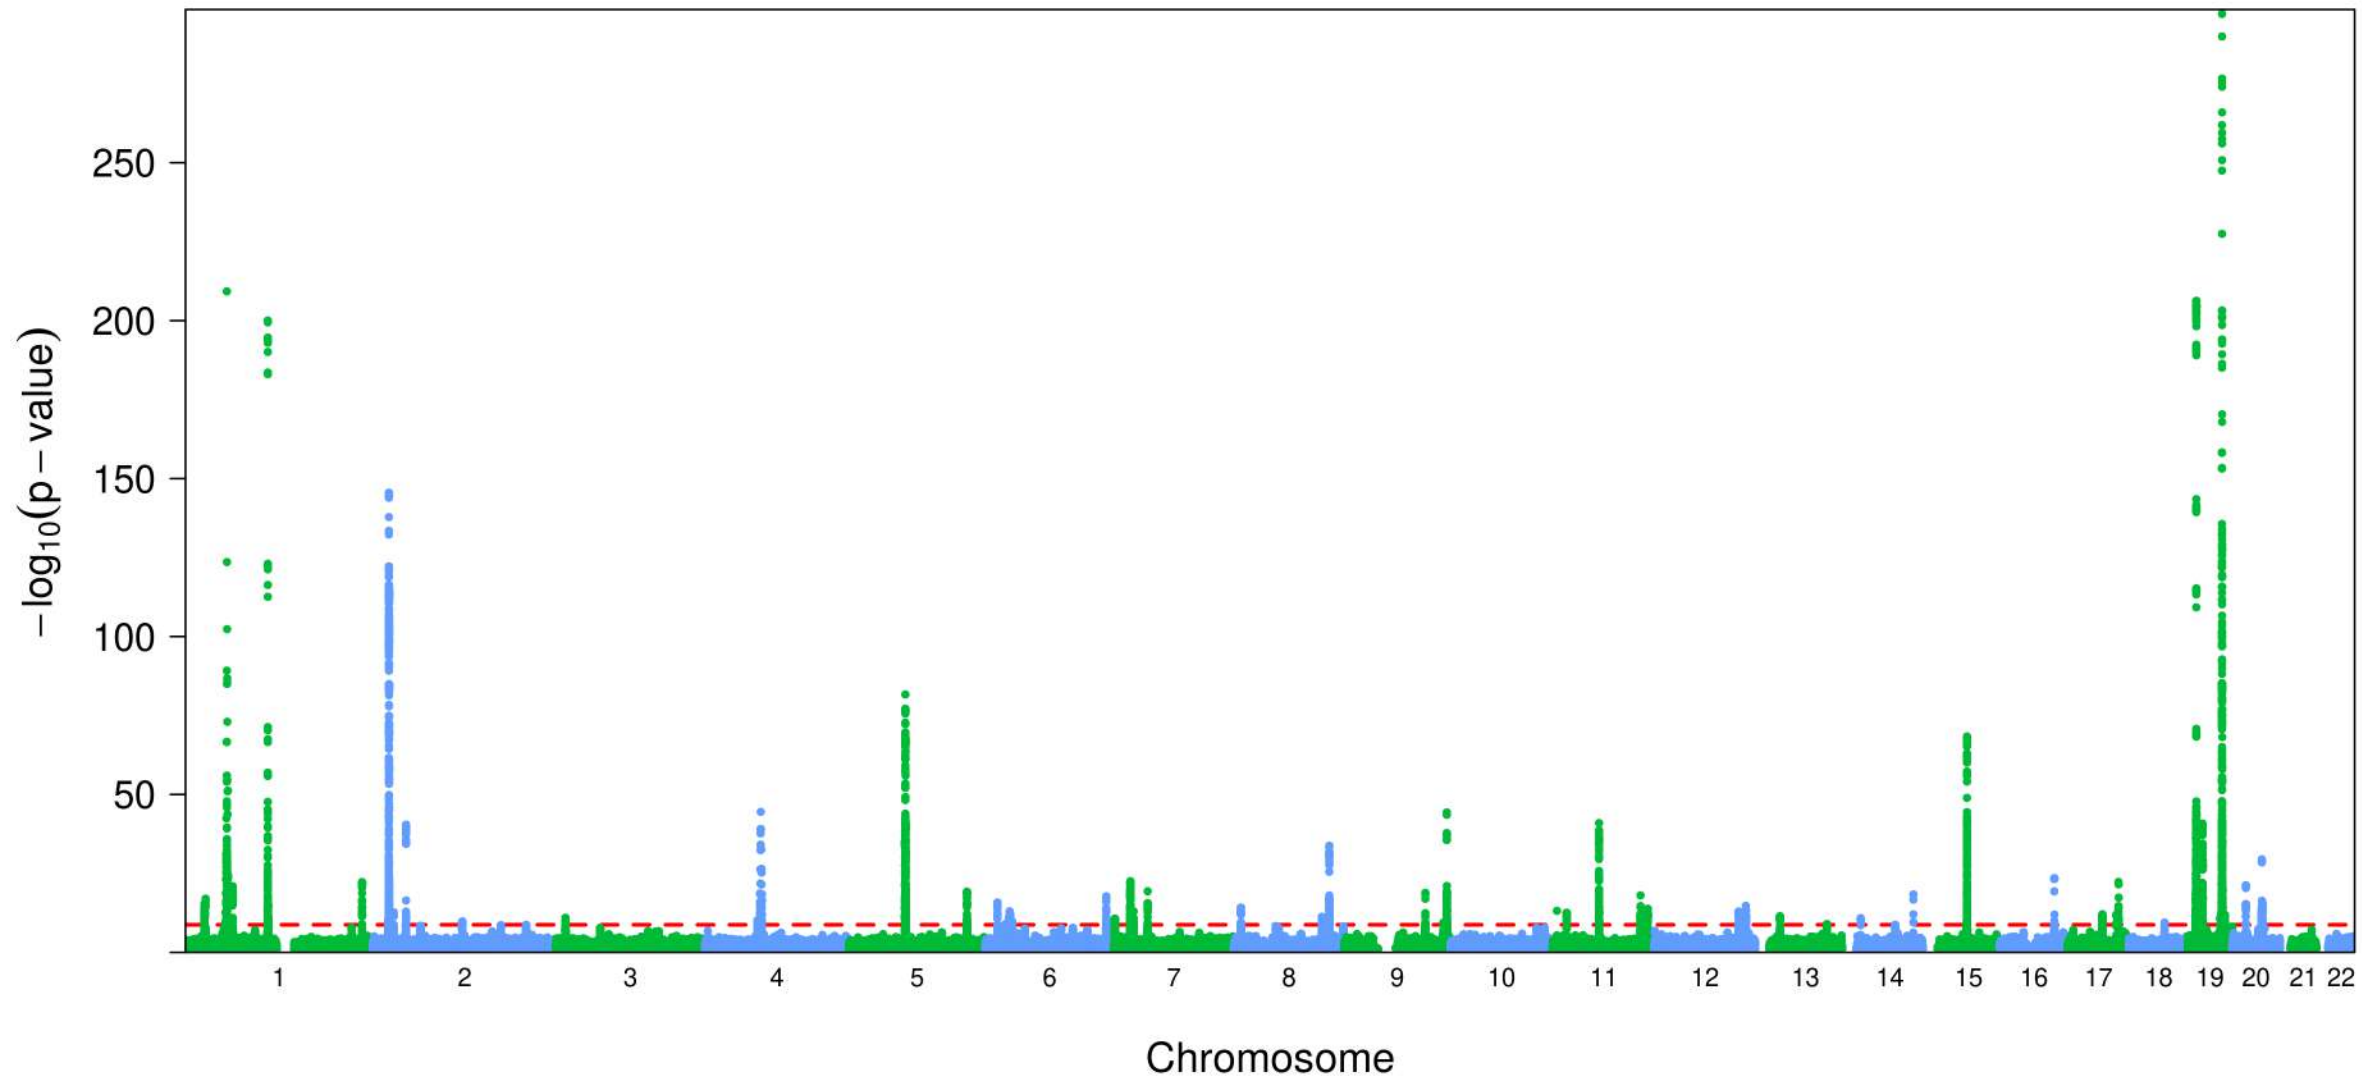

# L-LDL-P

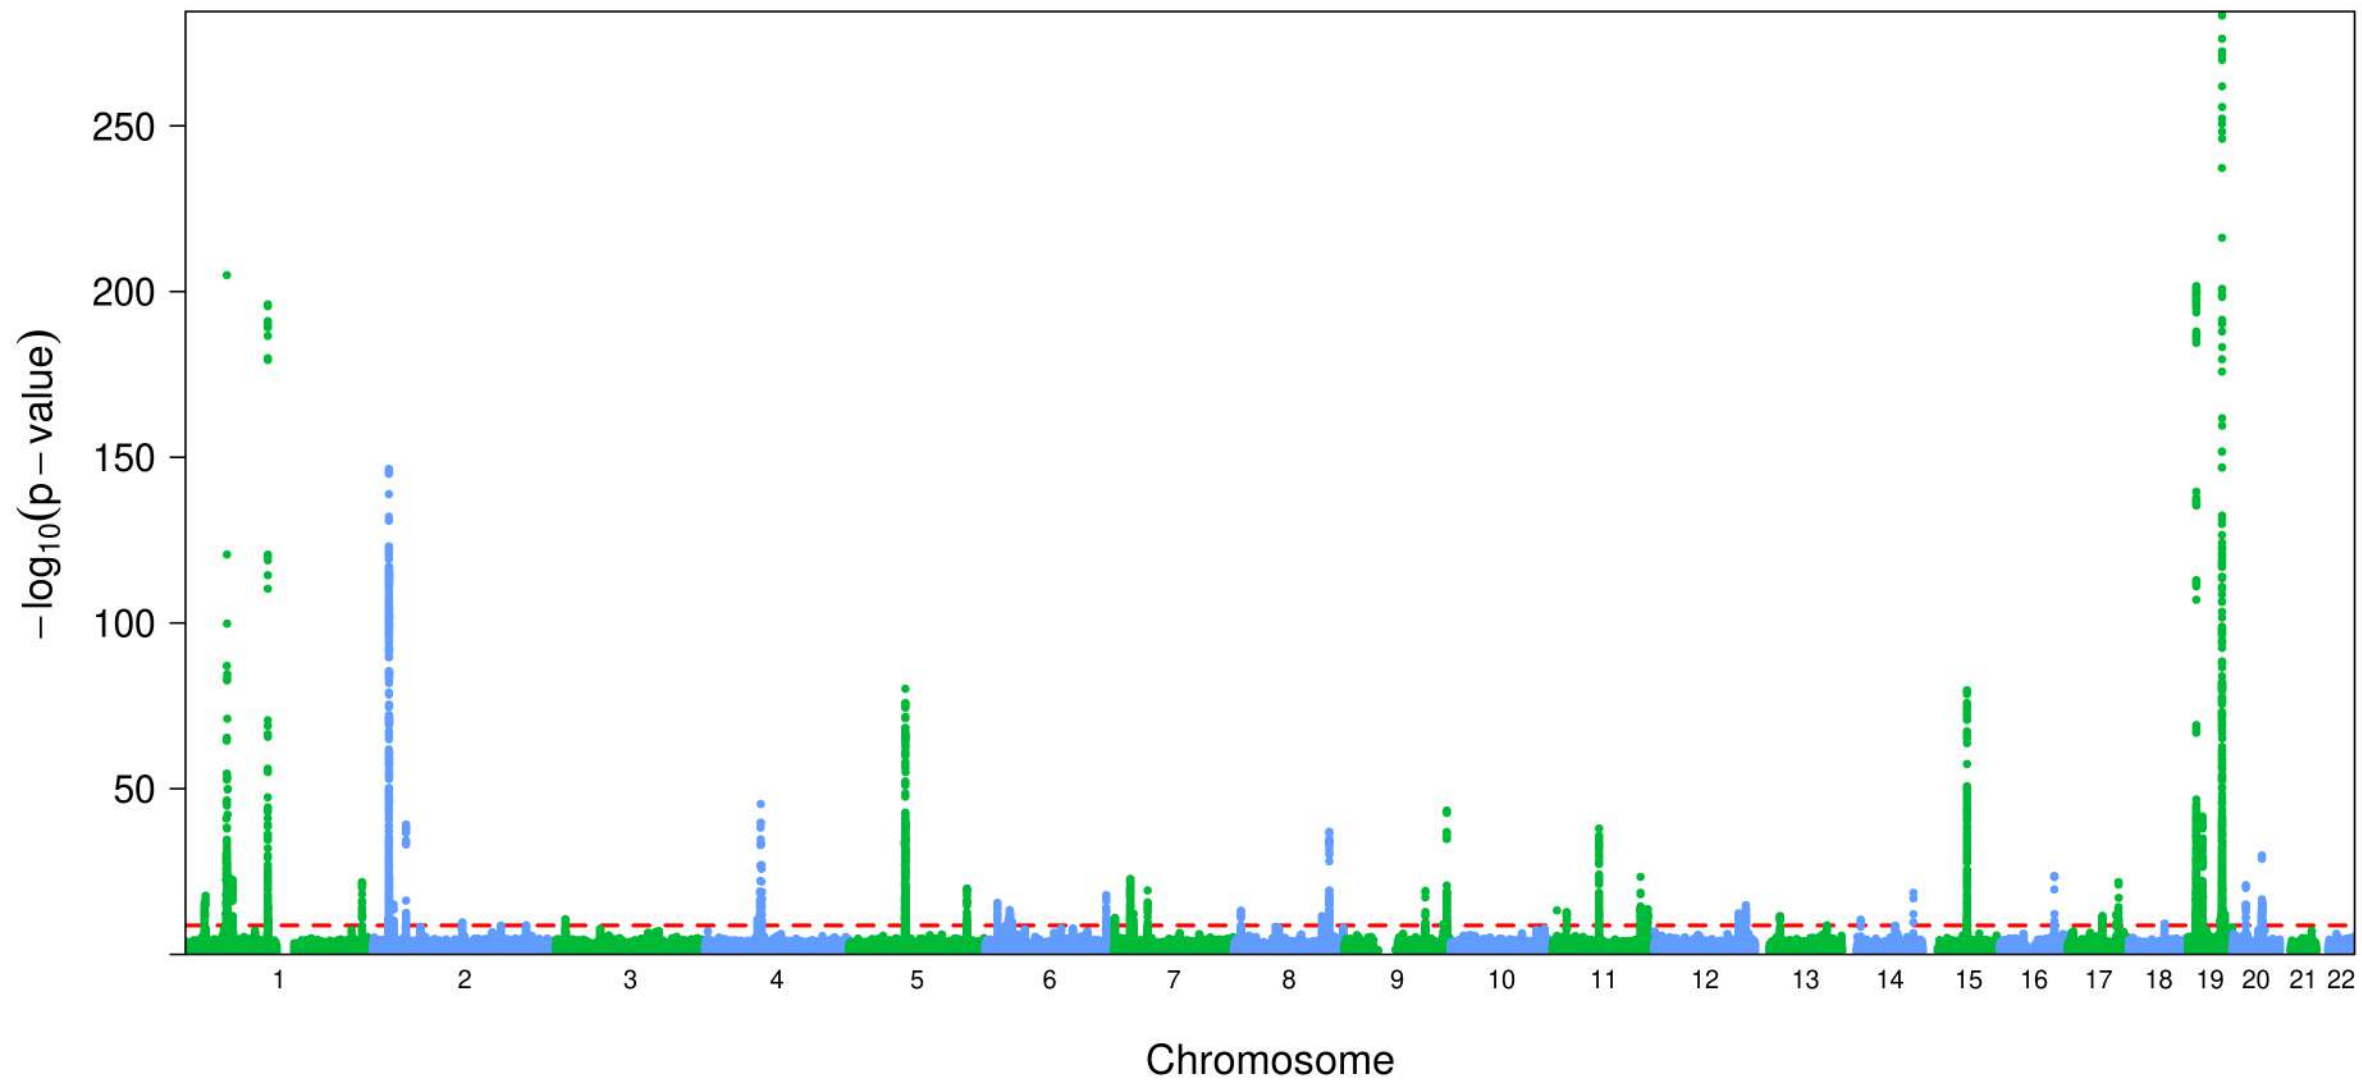

# L-LDL-PL

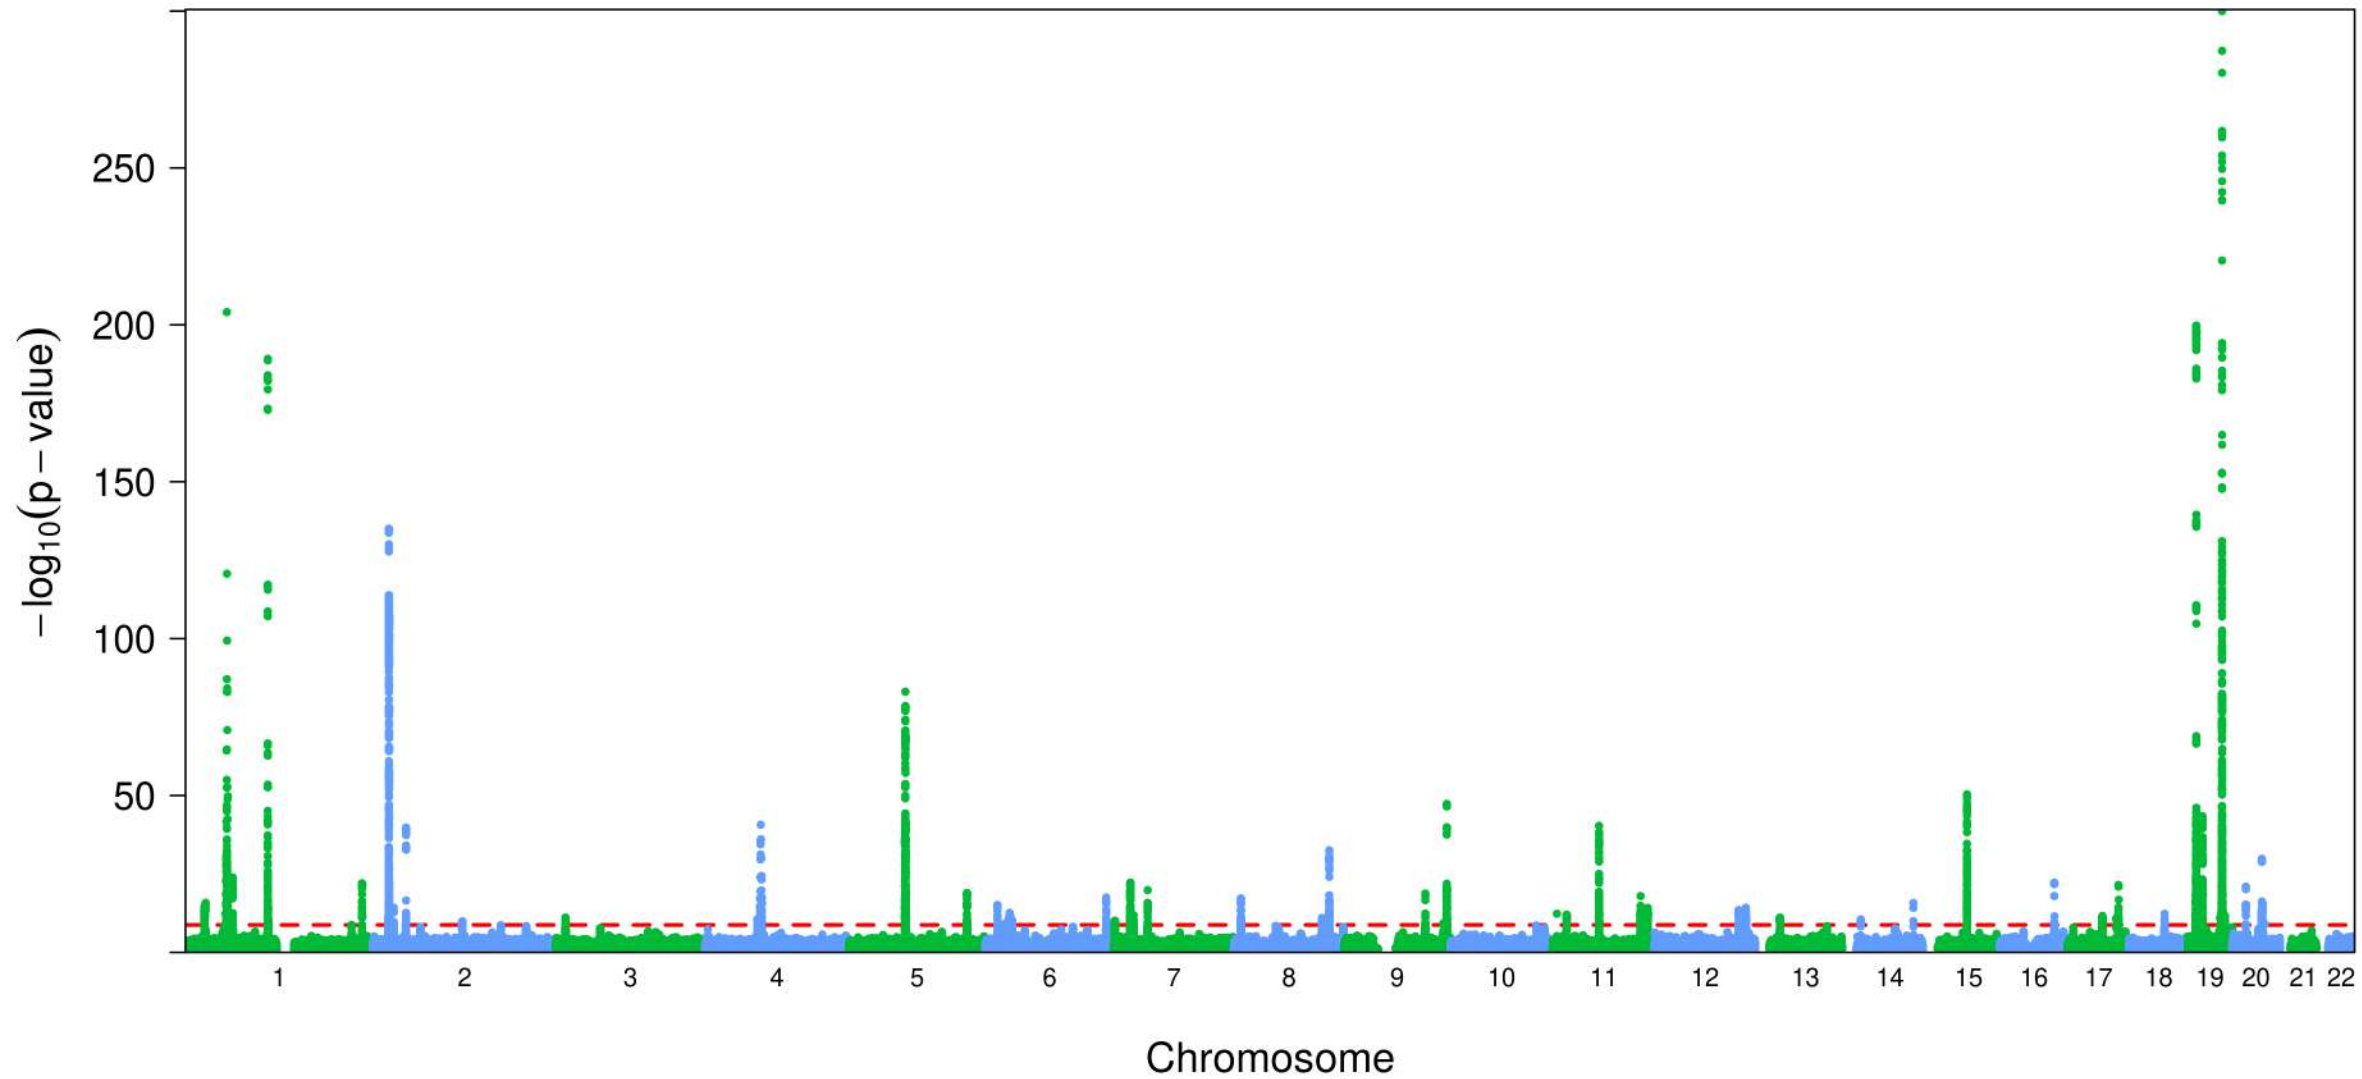

## L-LDL-PL\_percent

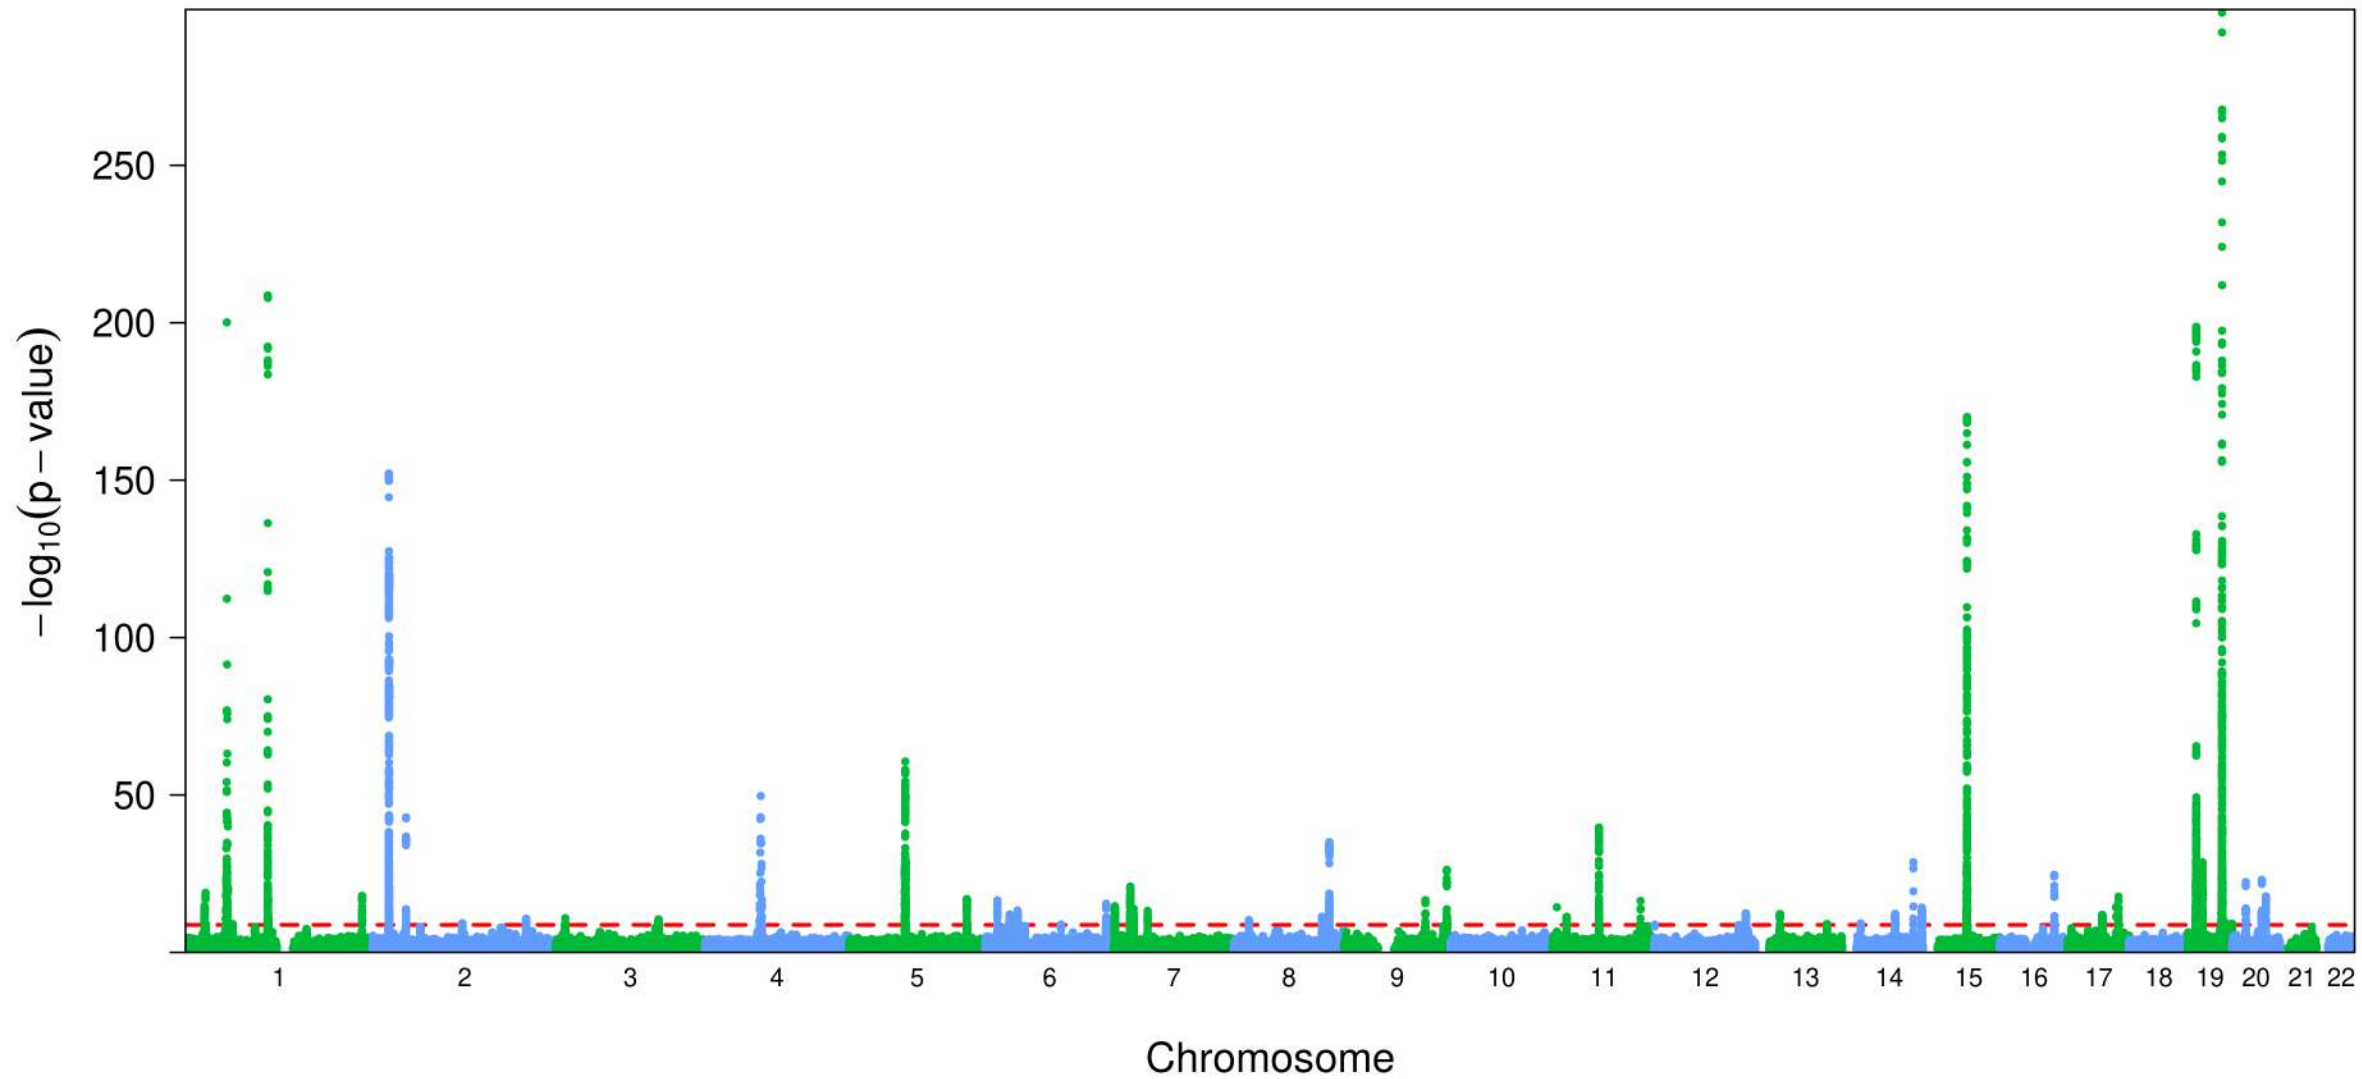

# L-LDL-TG

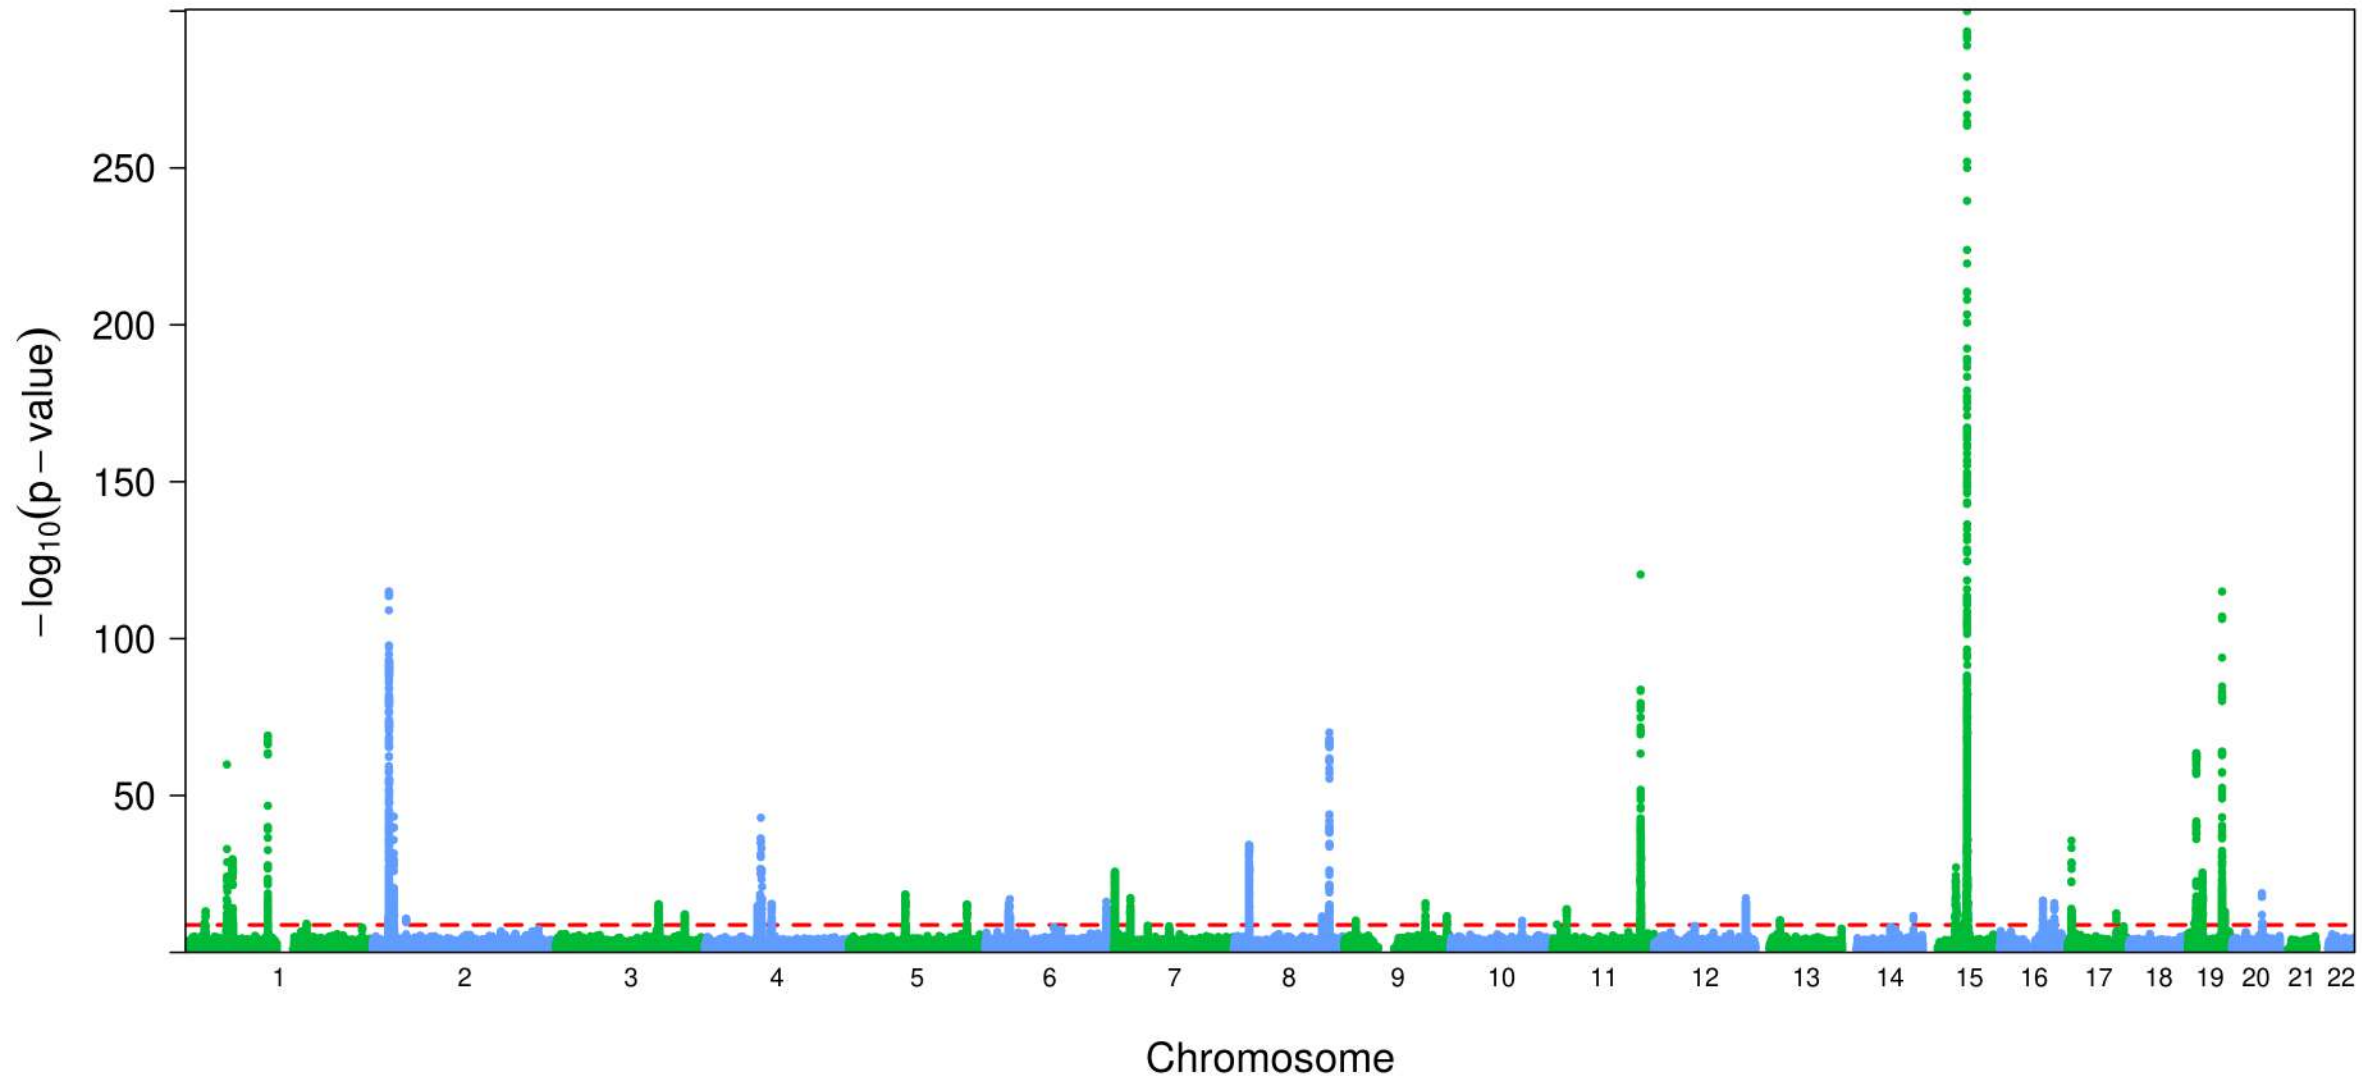

# L-LDL-TG\_percent

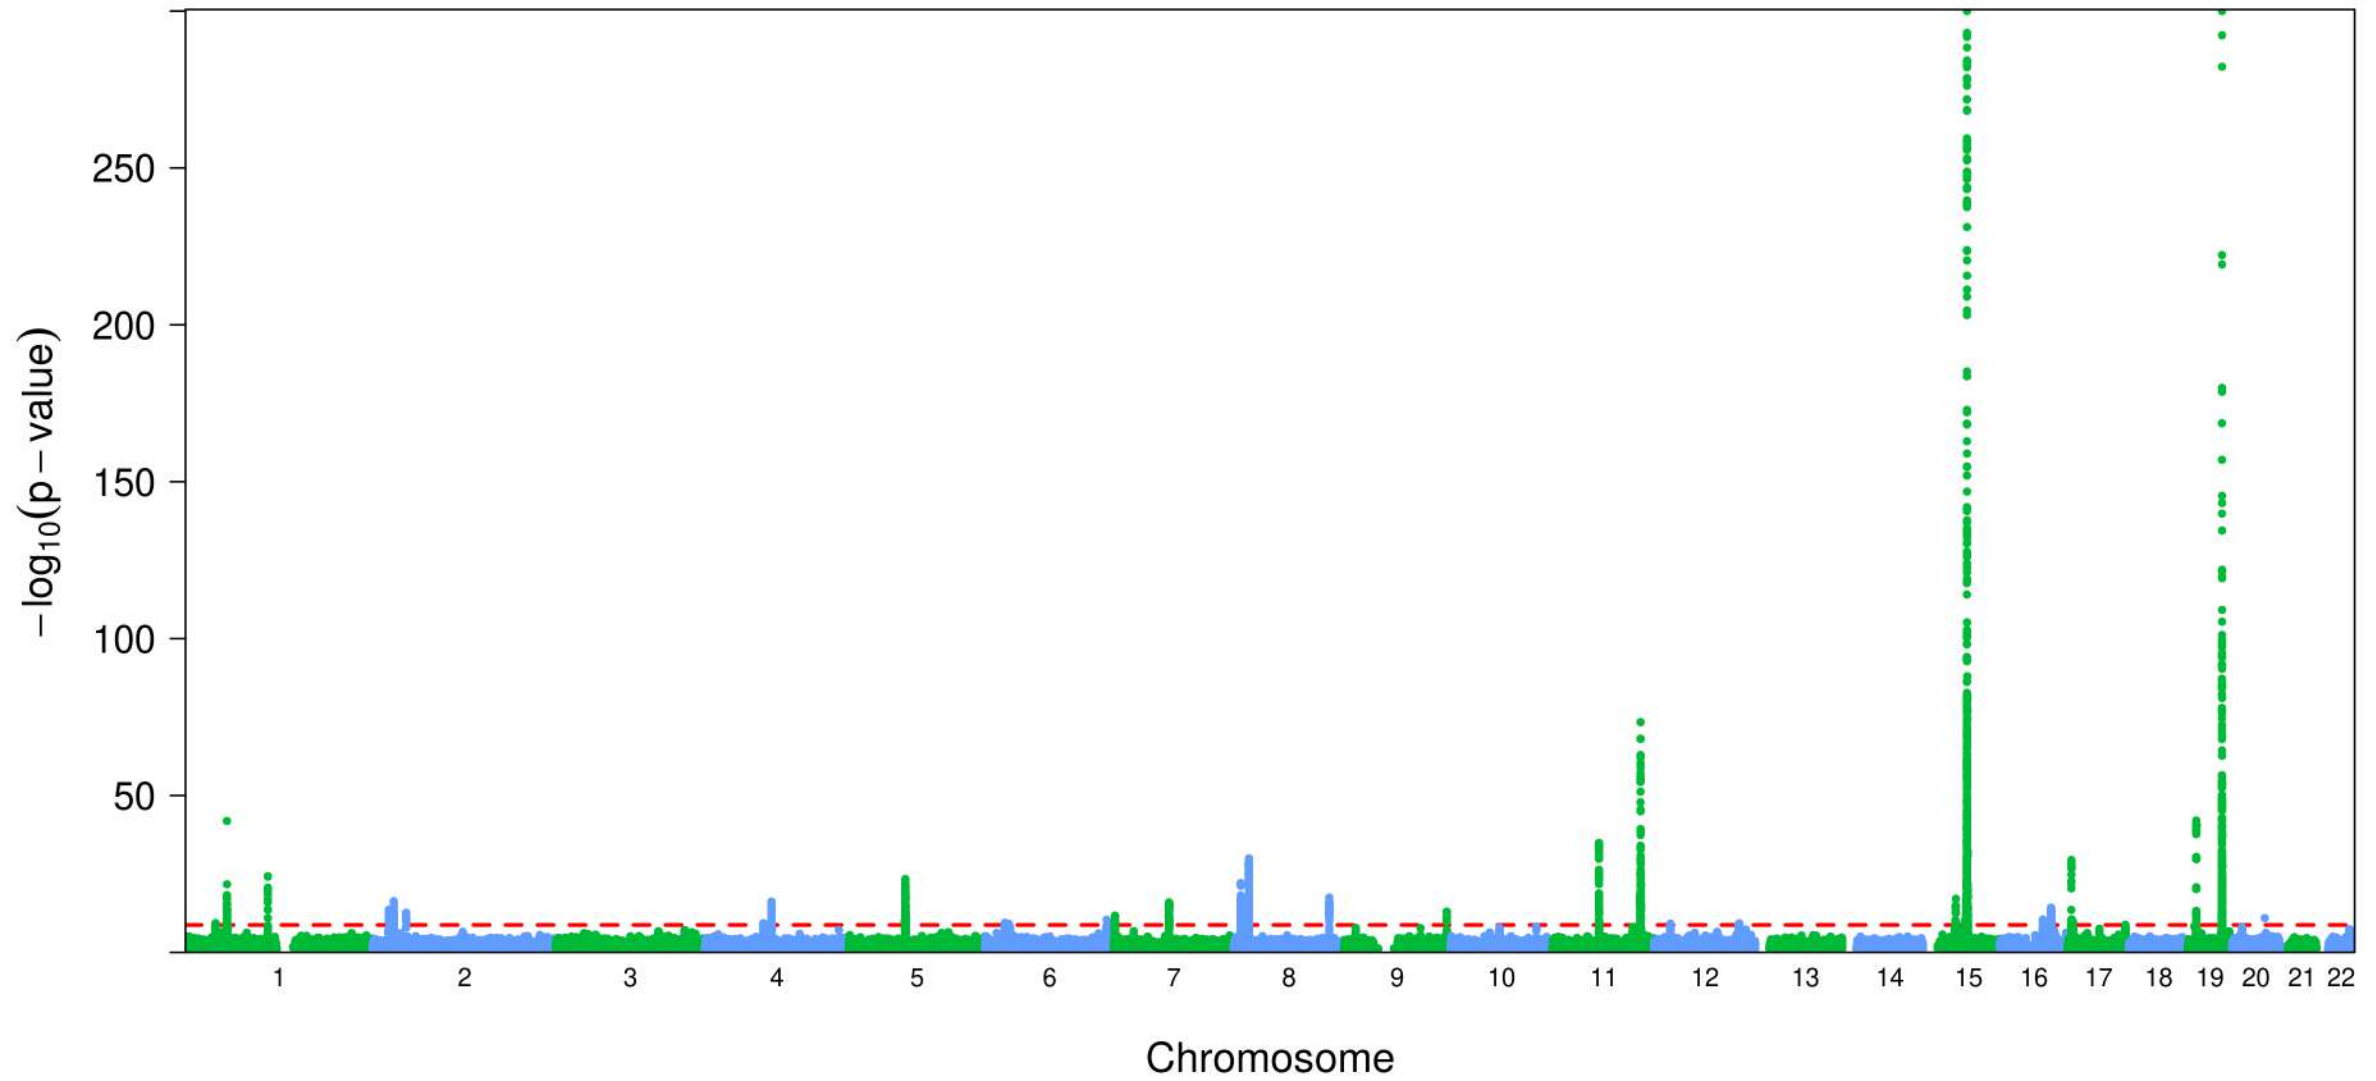

# L-VLDL-C

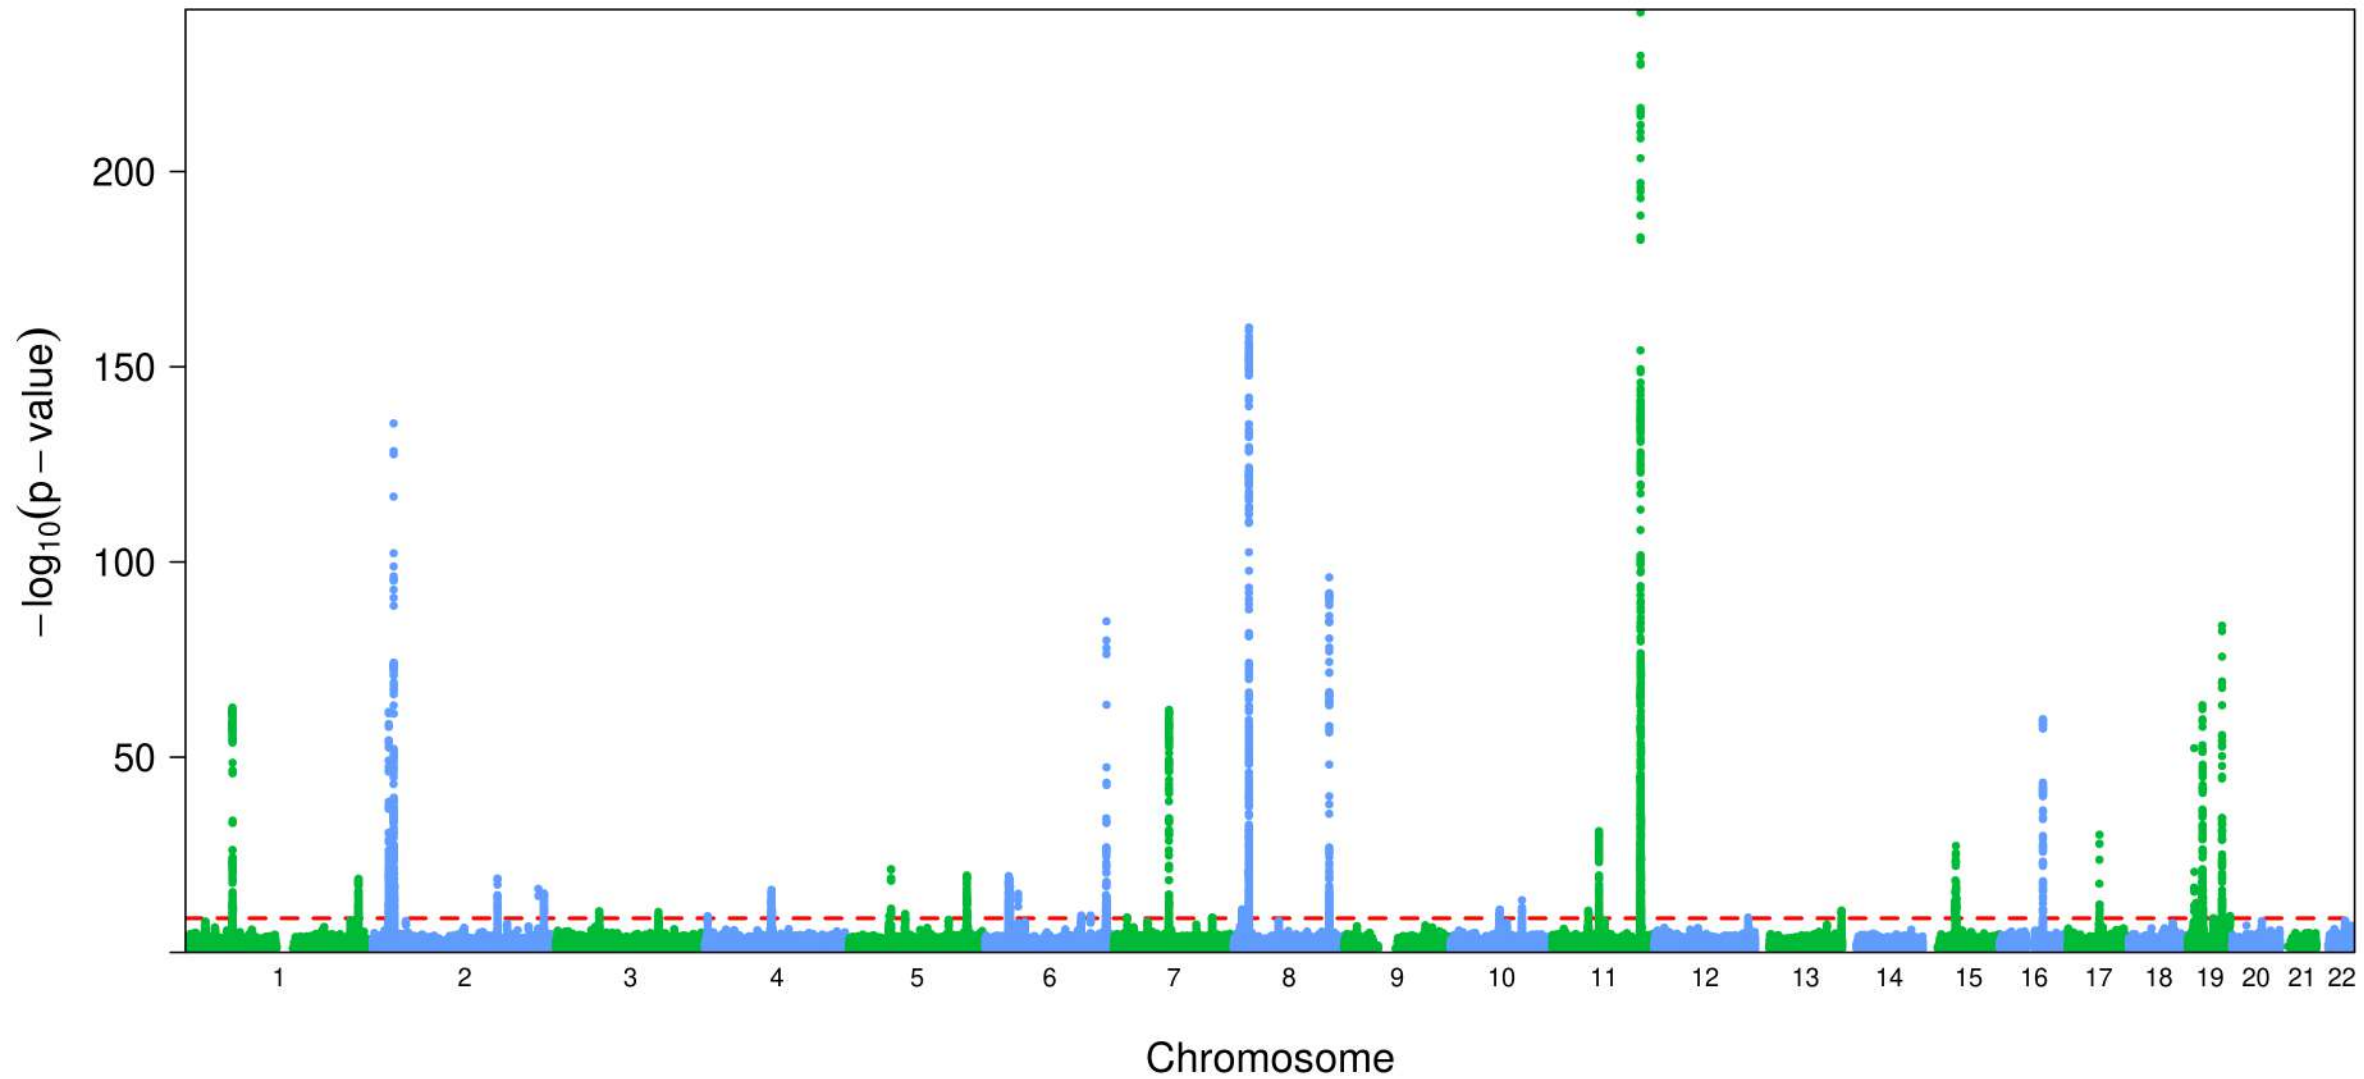



# L-VLDL-C\_percent

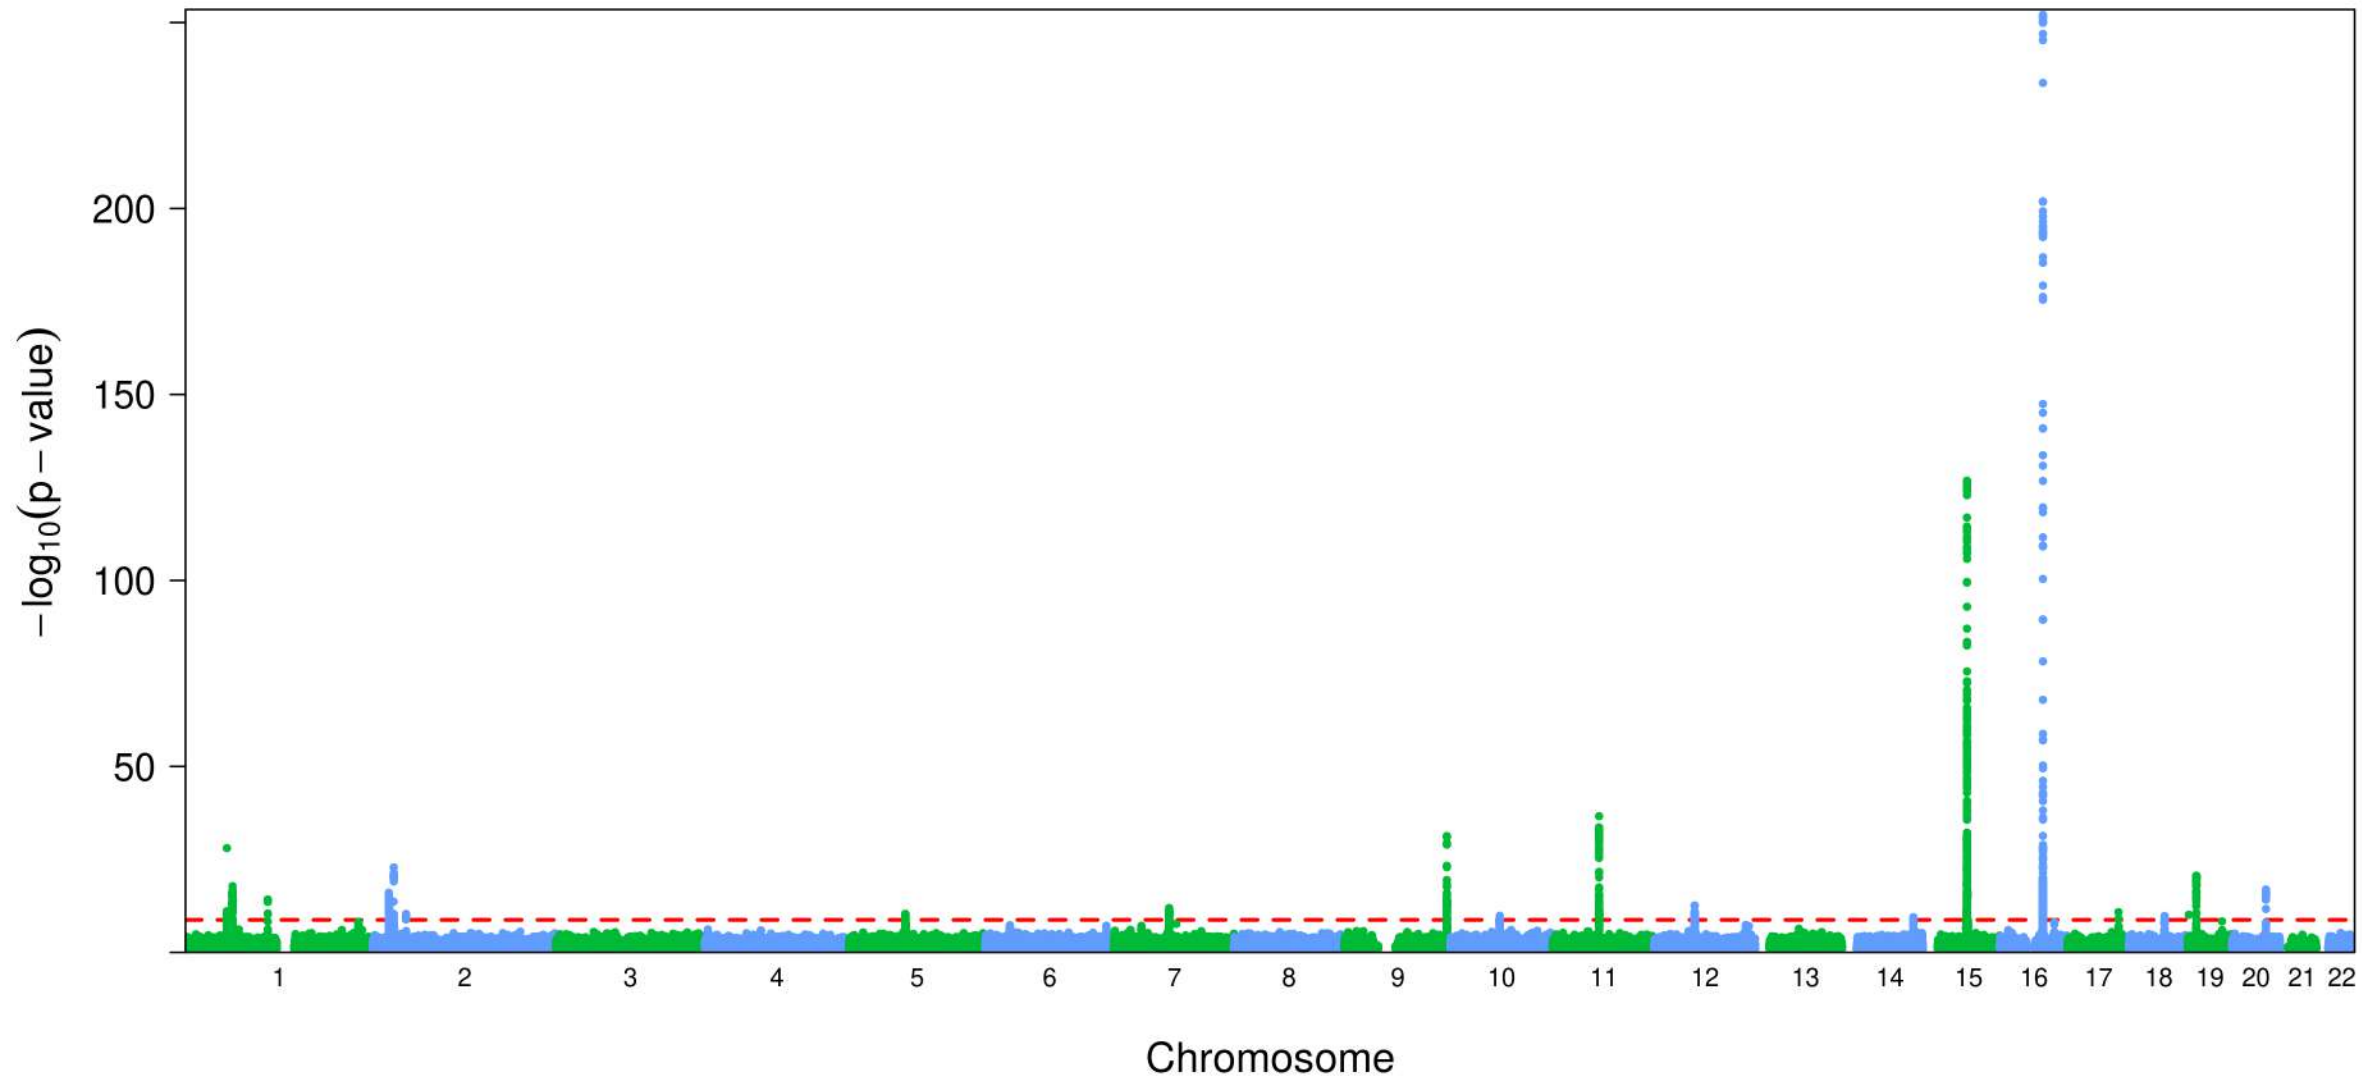

# L-VLDL-CE

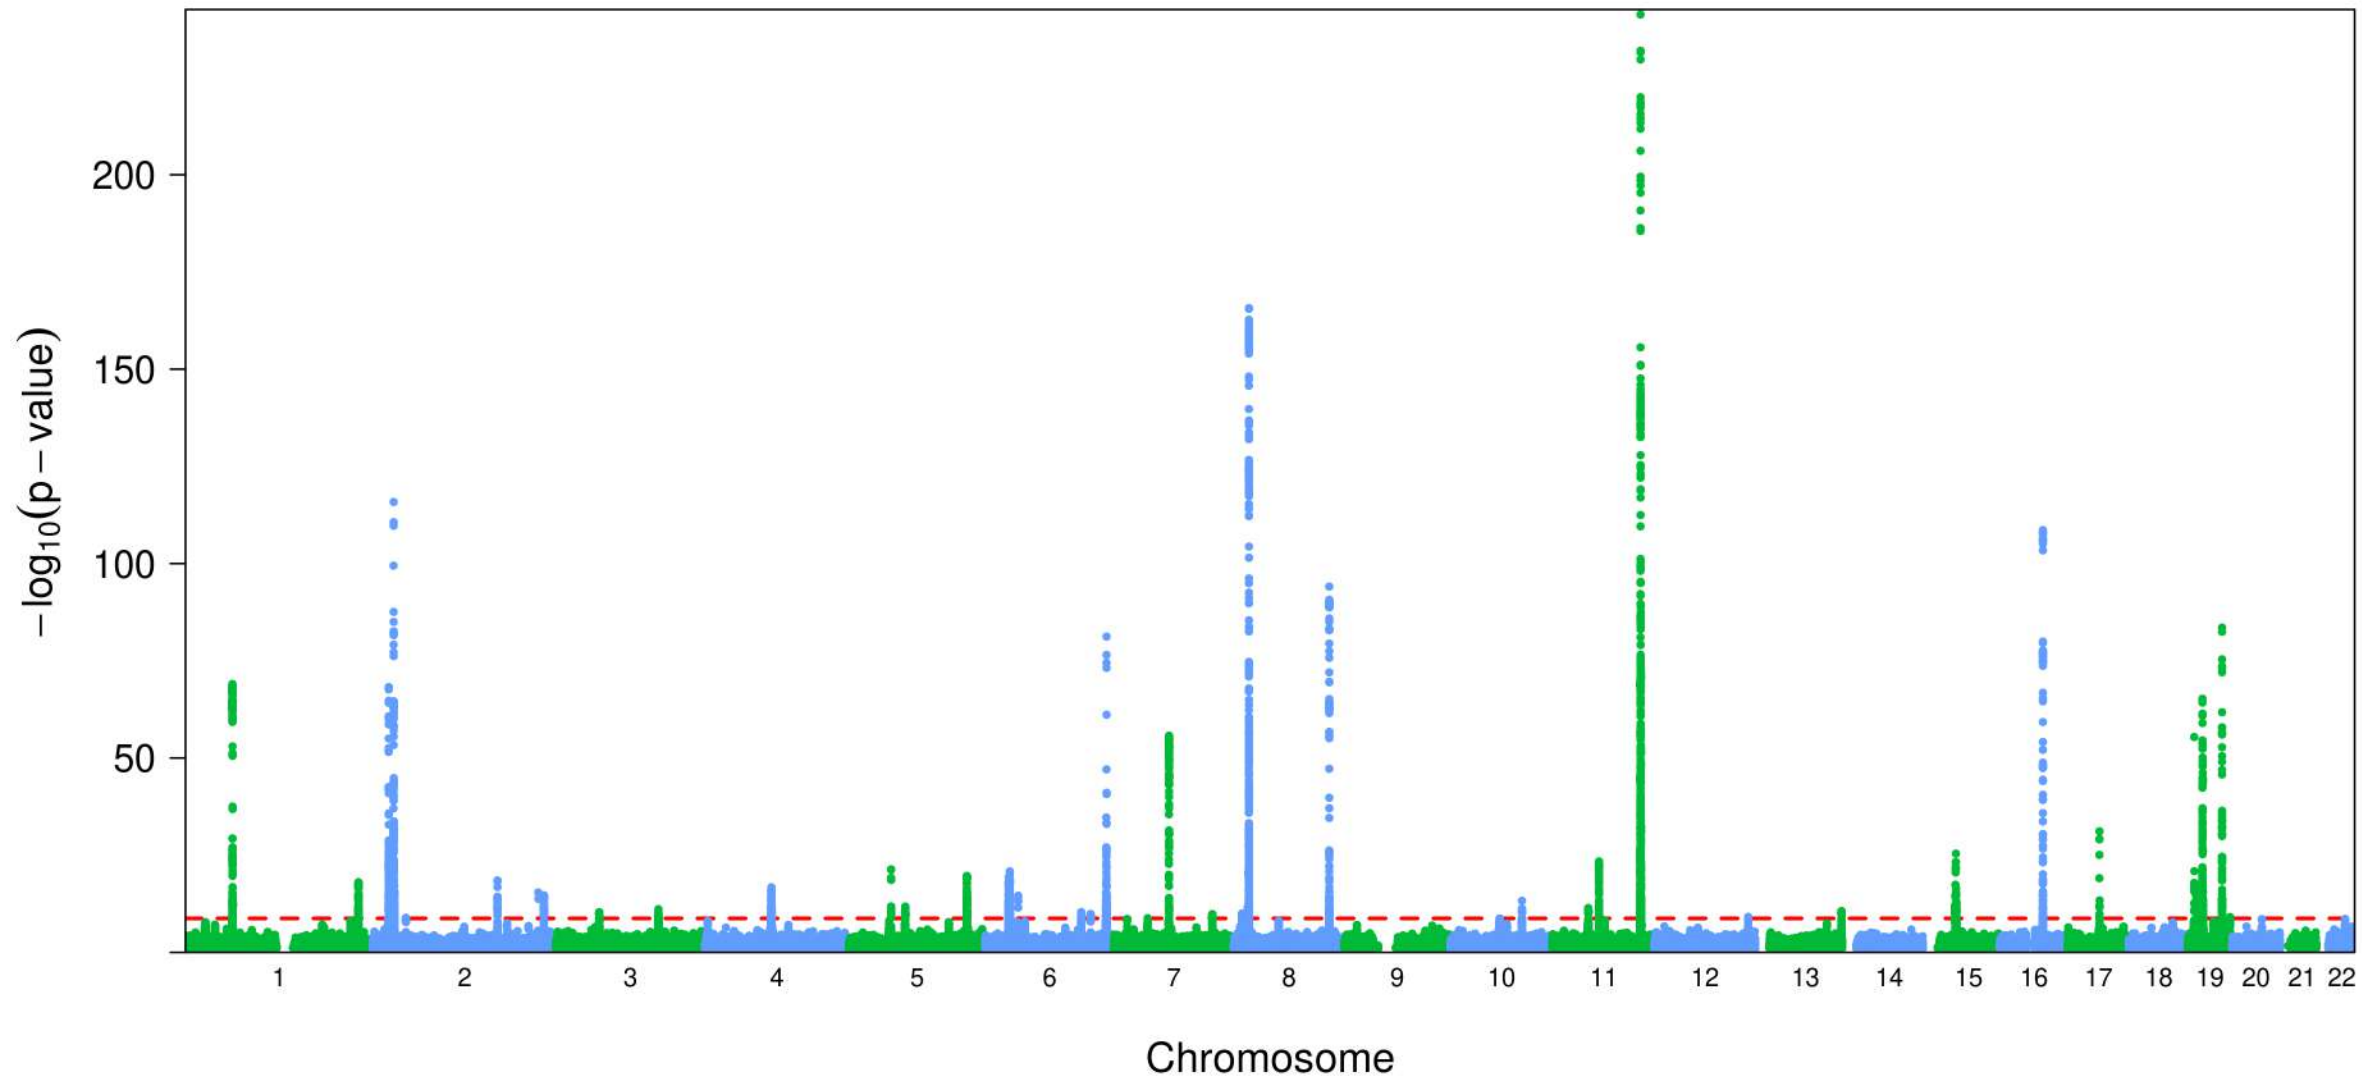

# L-VLDL-CE\_percent

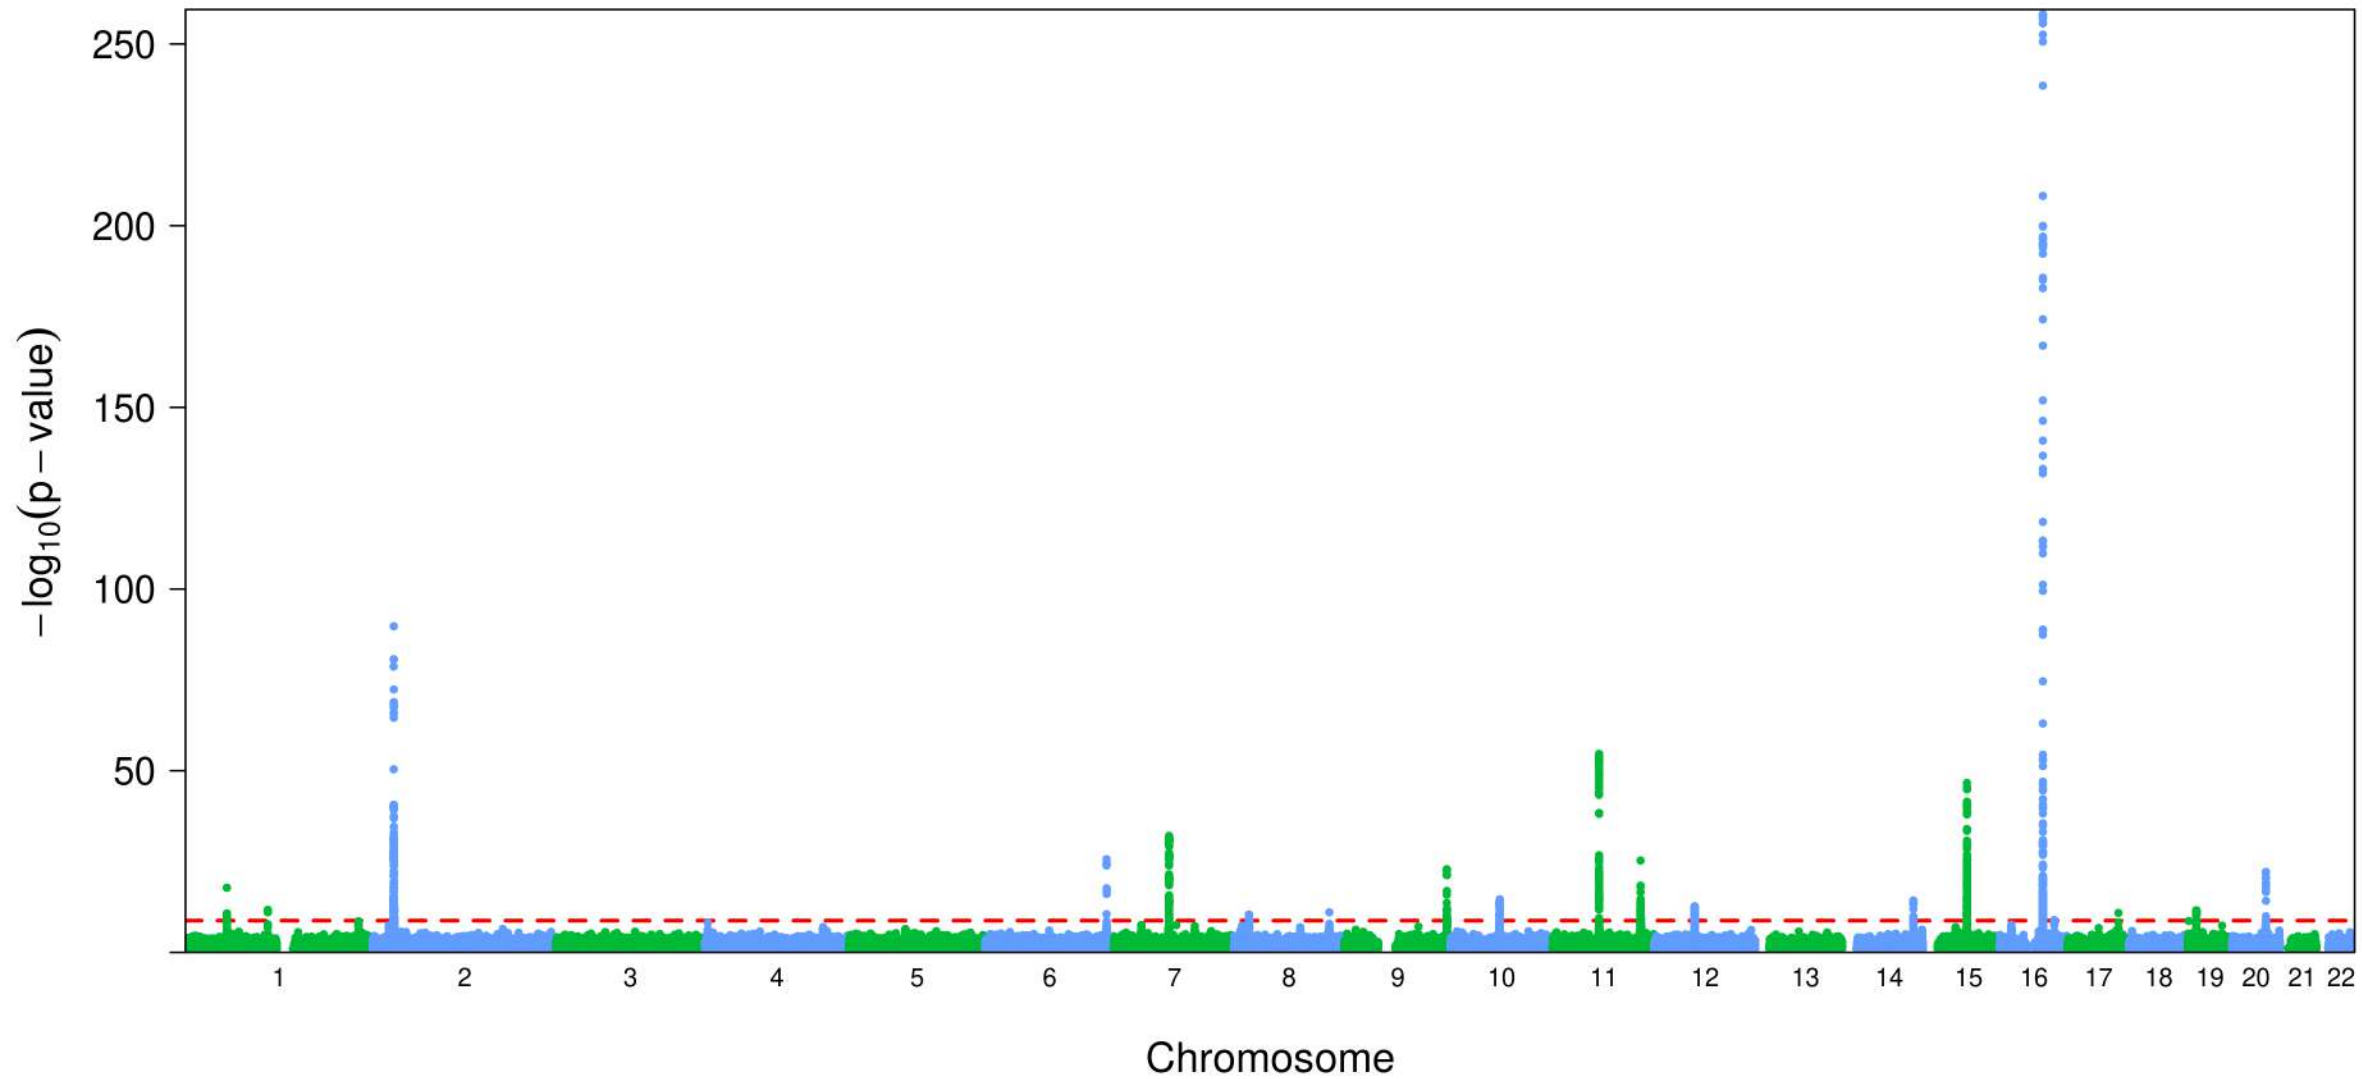

# L-VLDL-FC

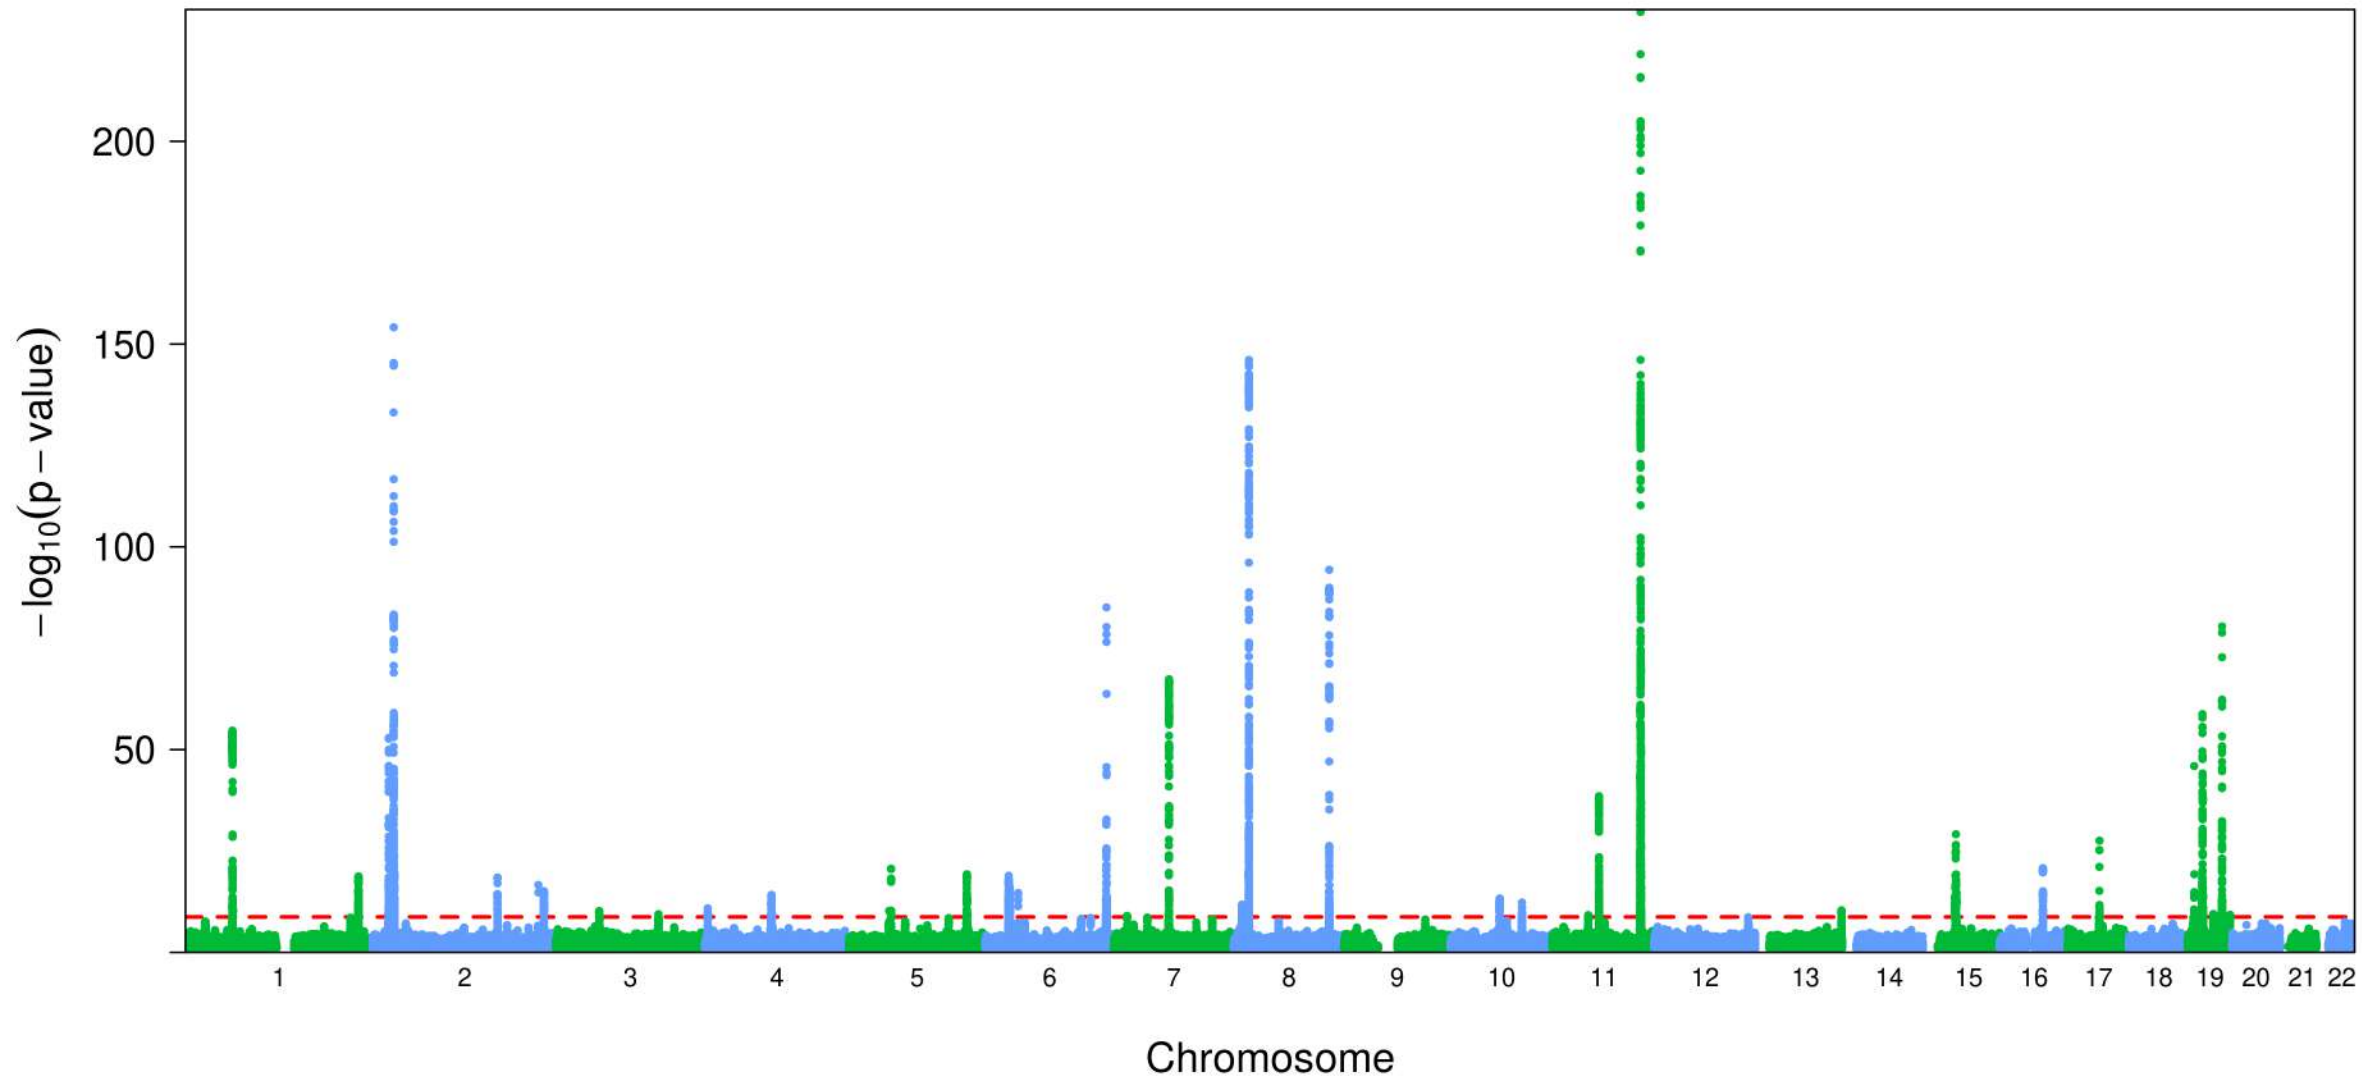

# L-VLDL-FC\_percent

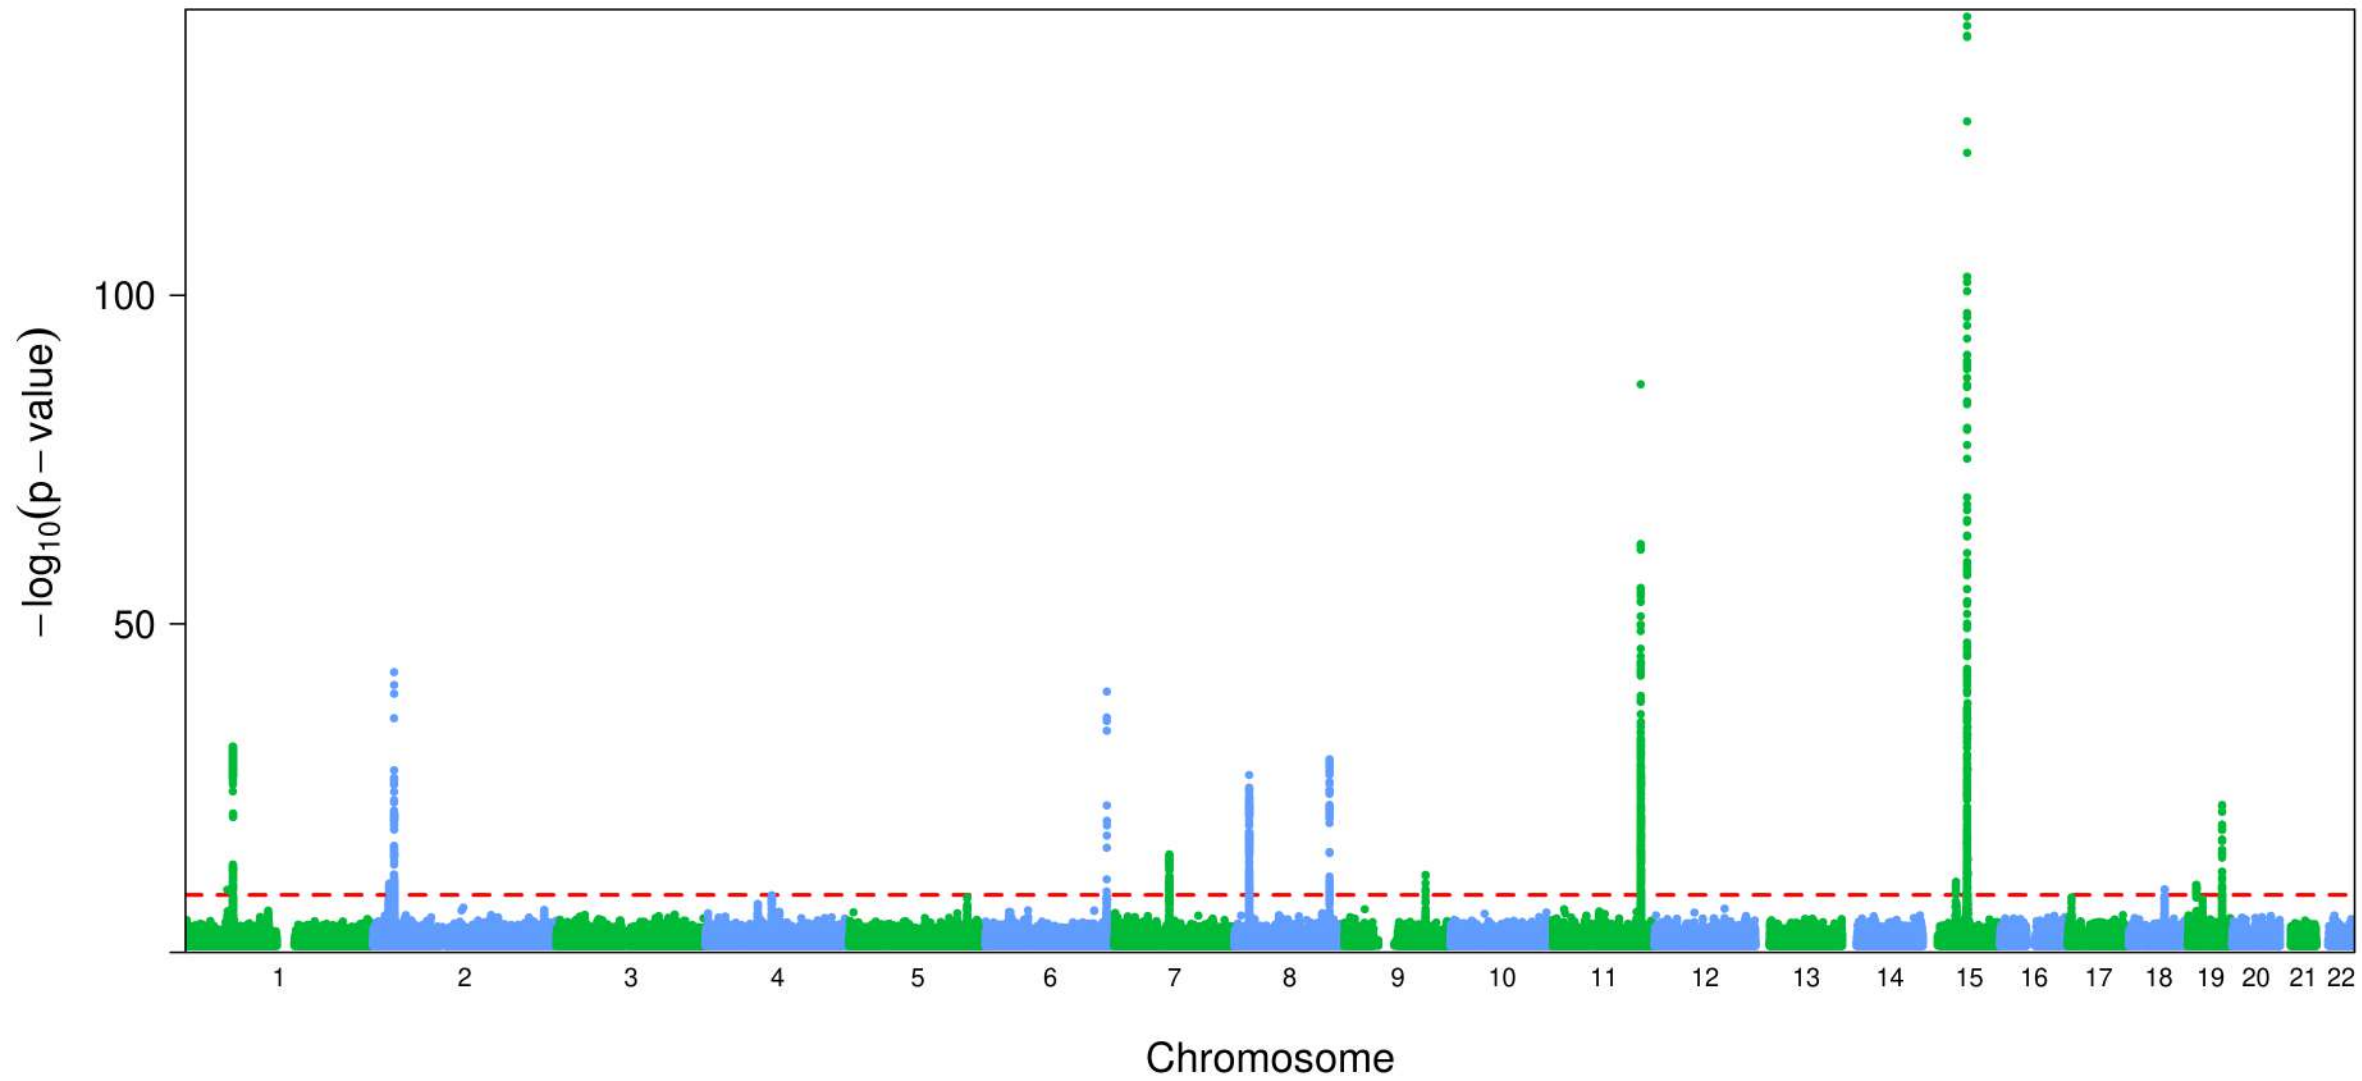

# L-VLDL-L

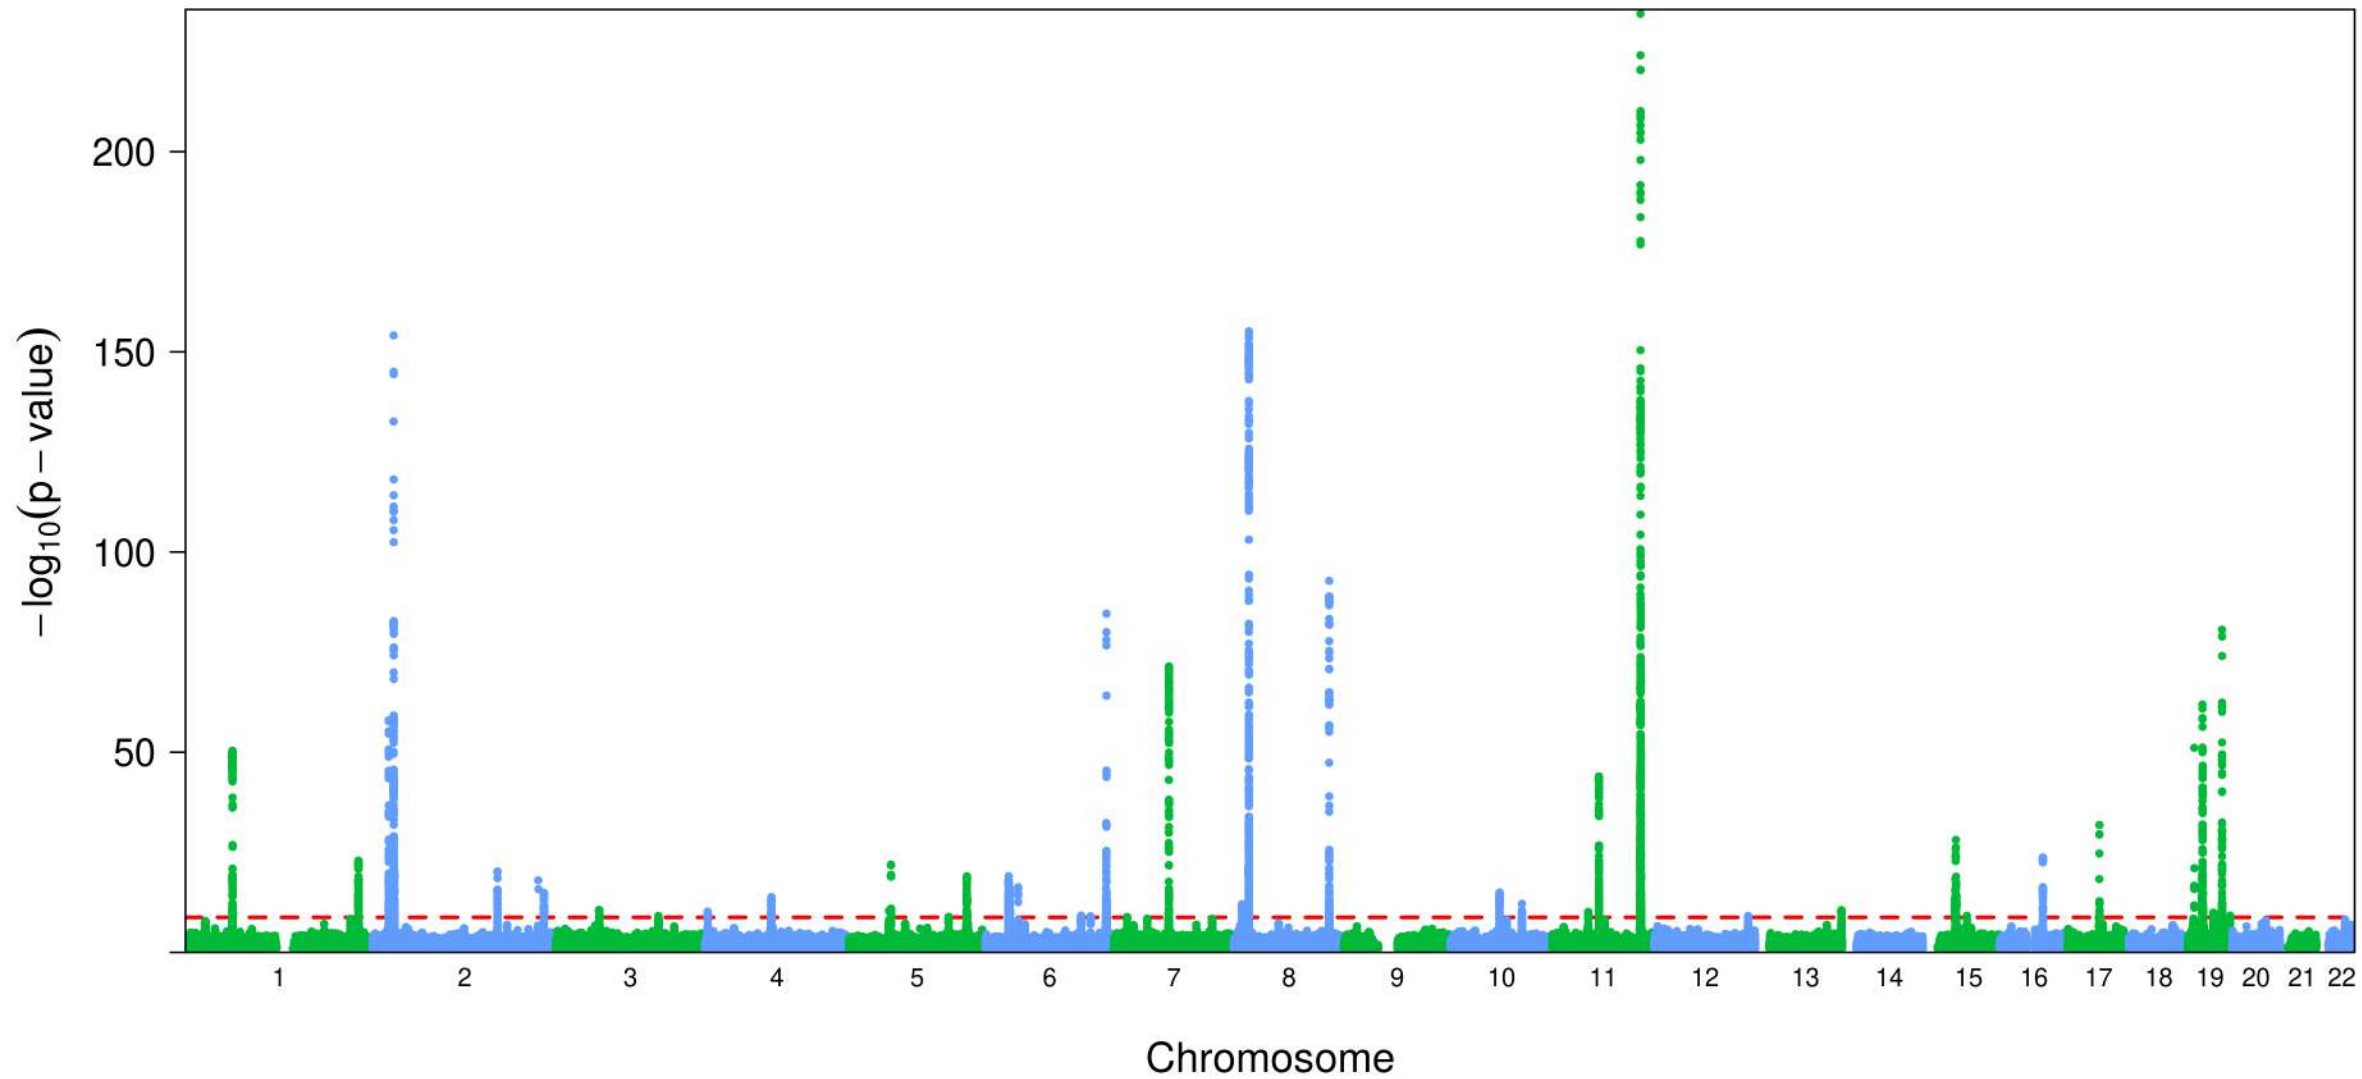

# L-VLDL-P

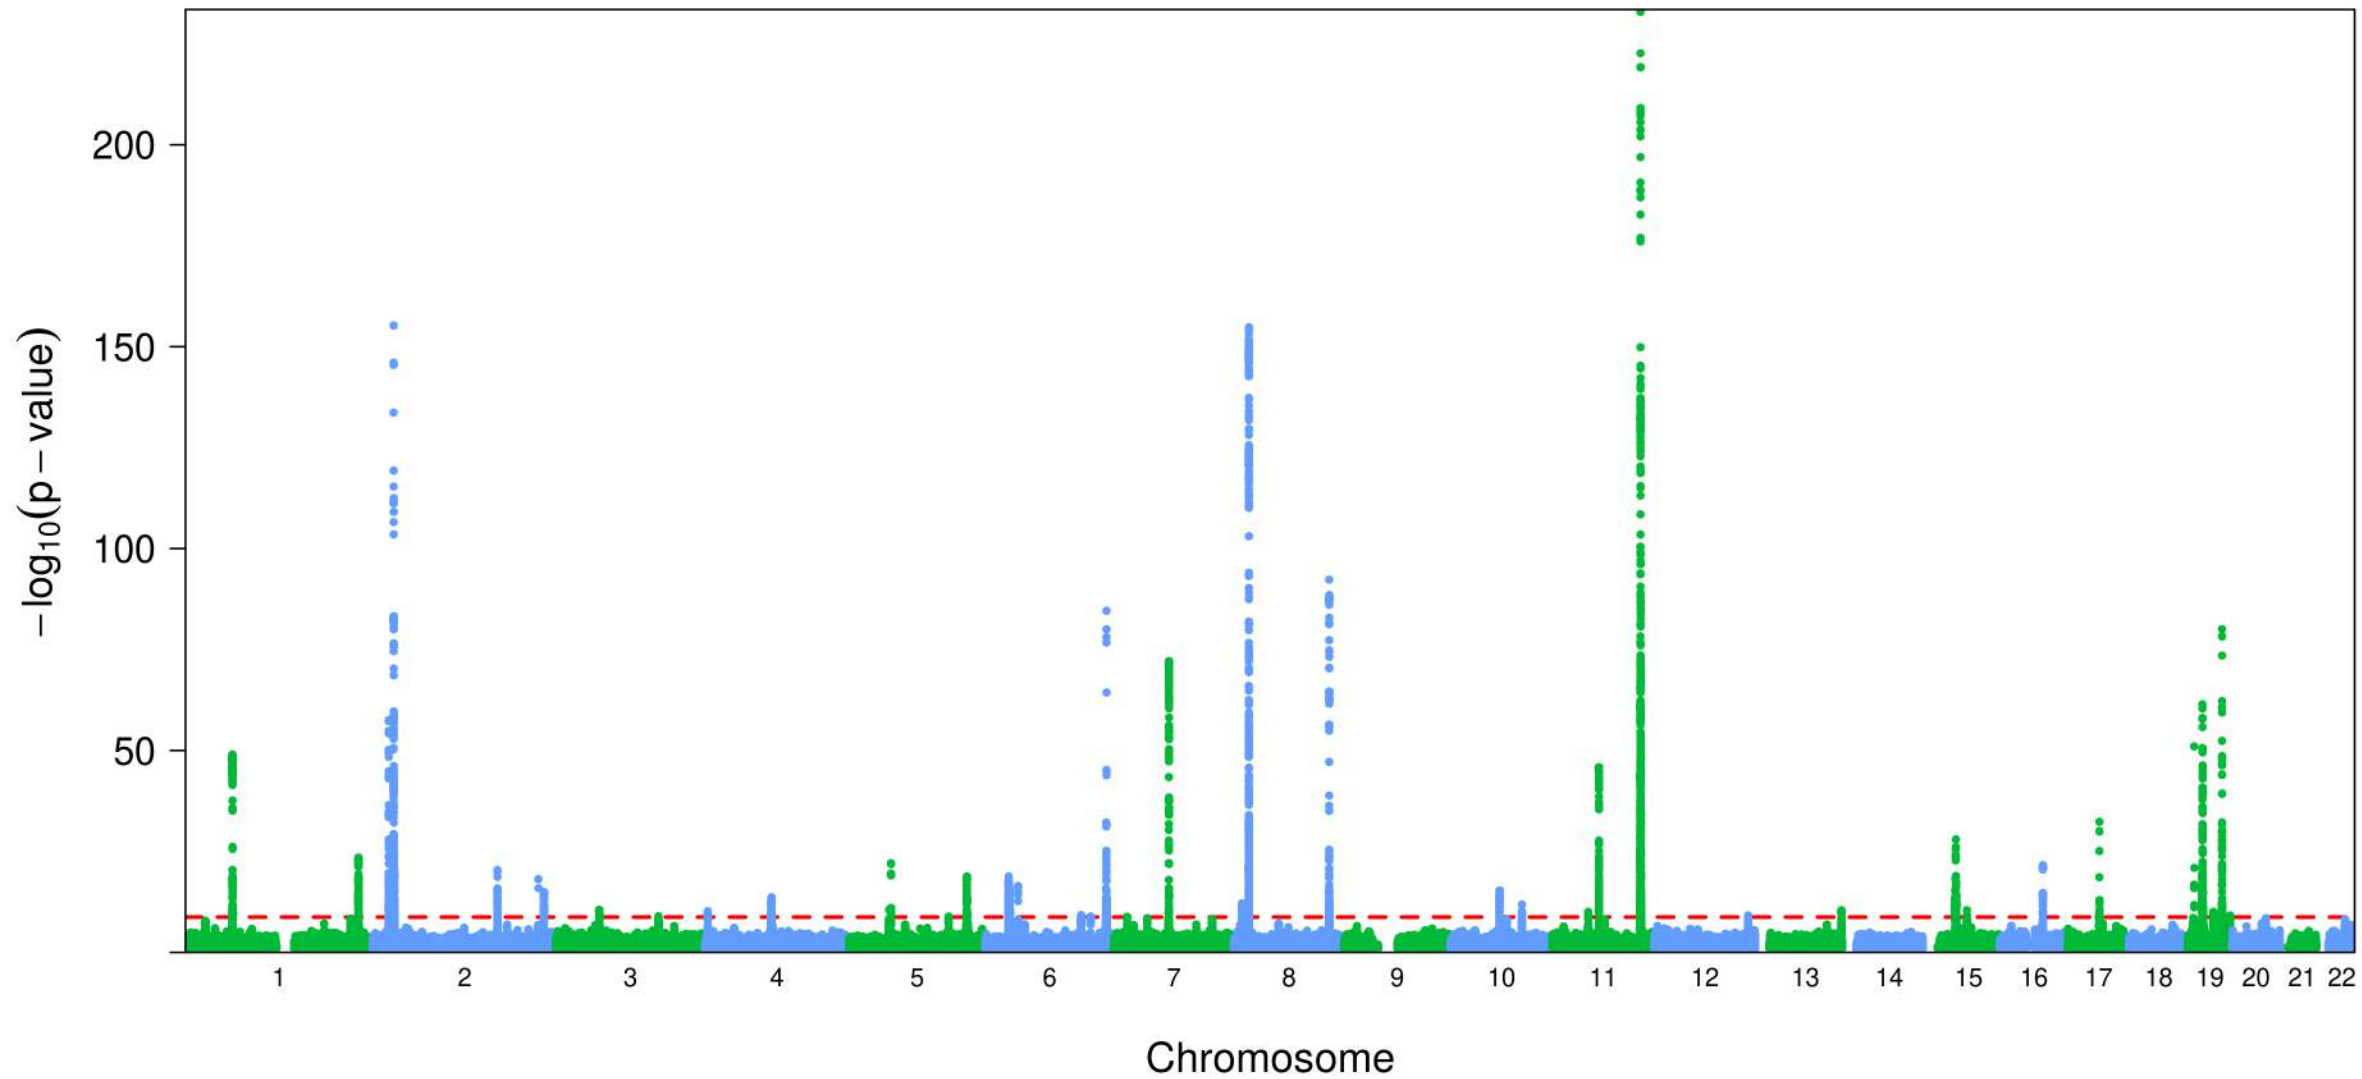

# L-VLDL-PL

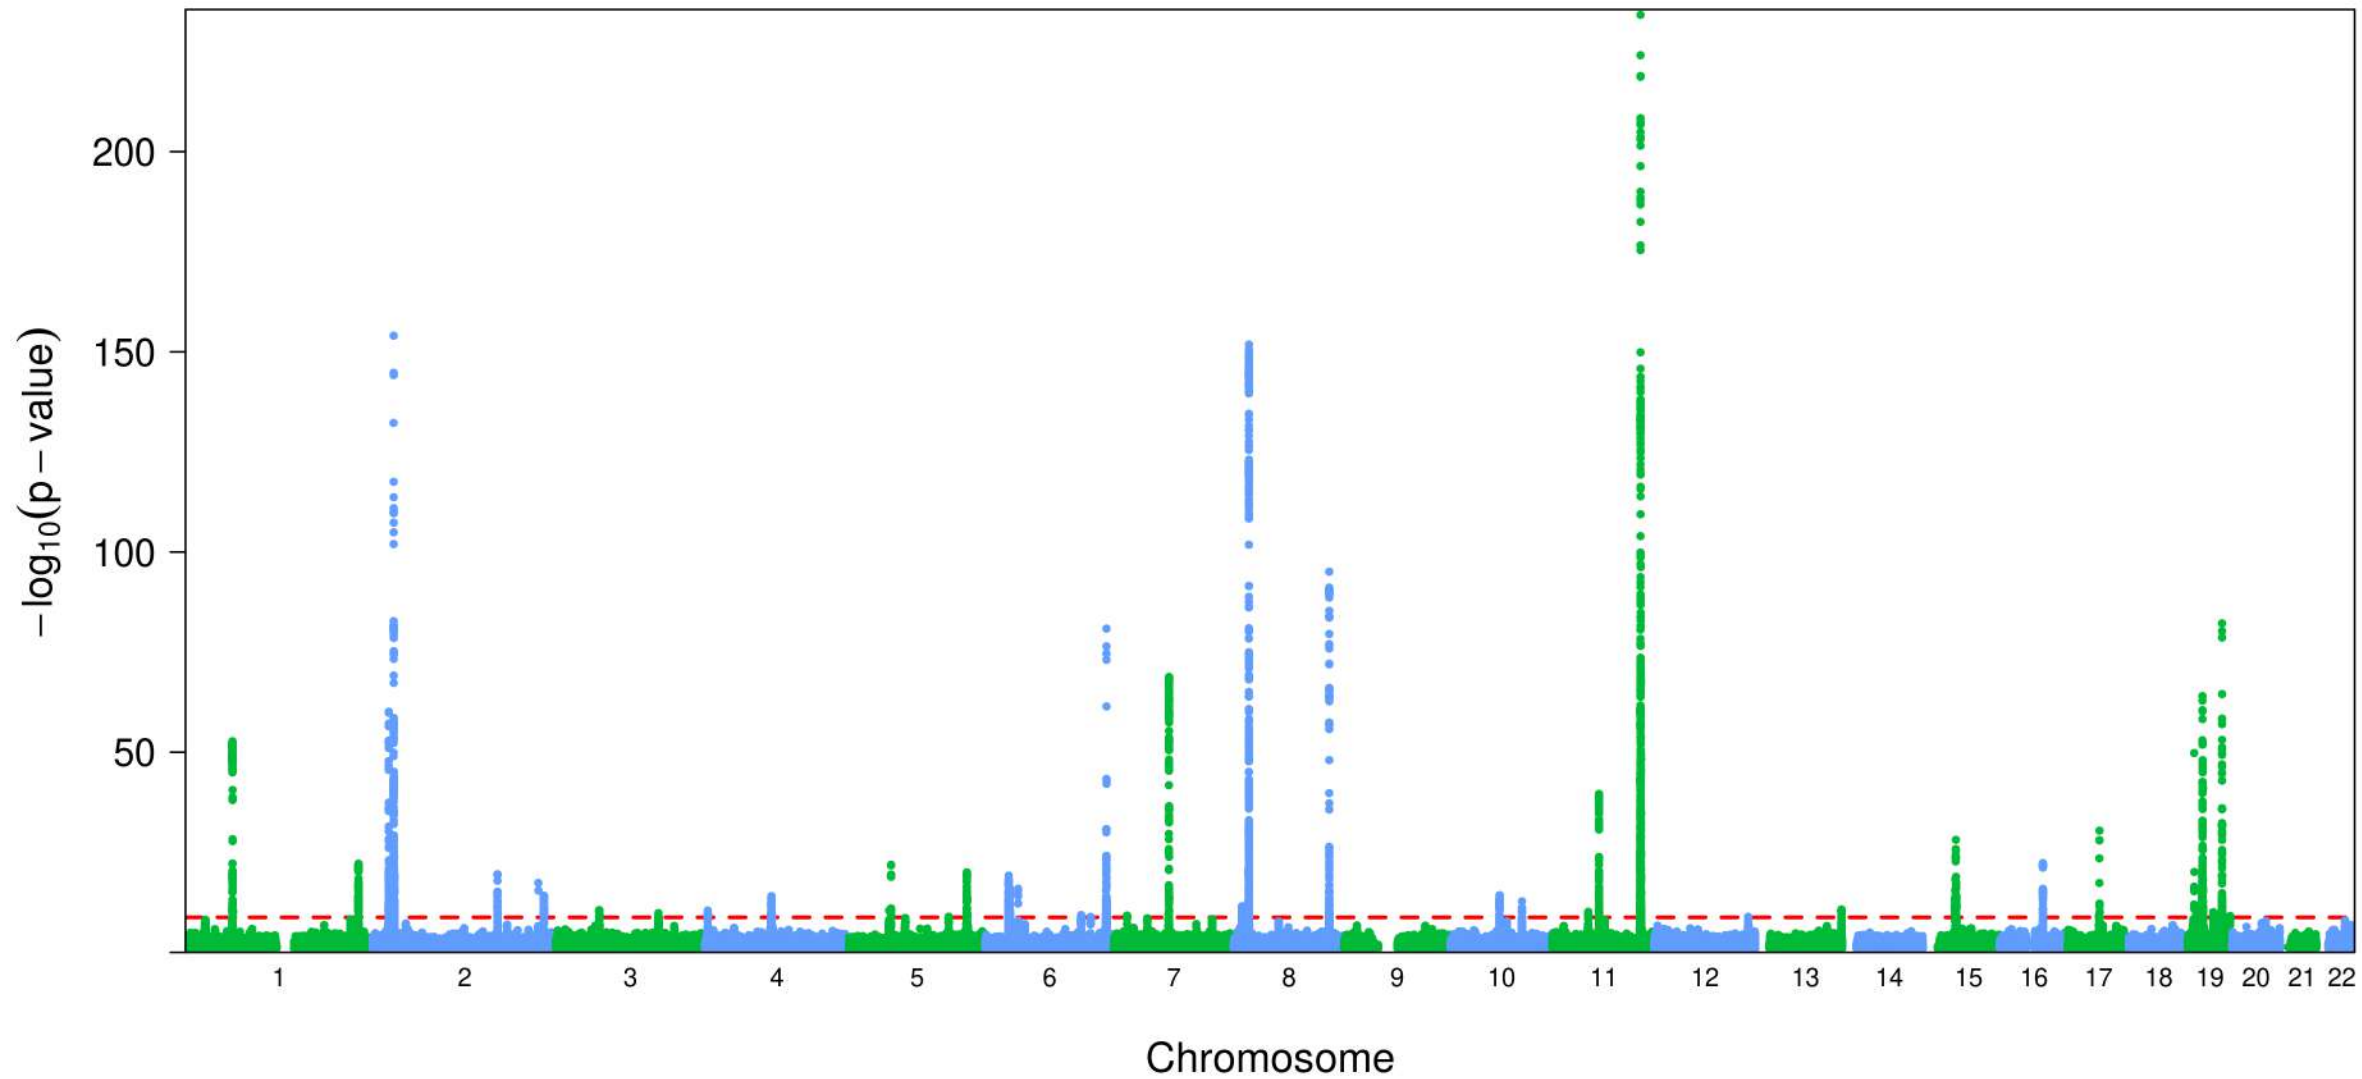



# L-VLDL-PL\_percent

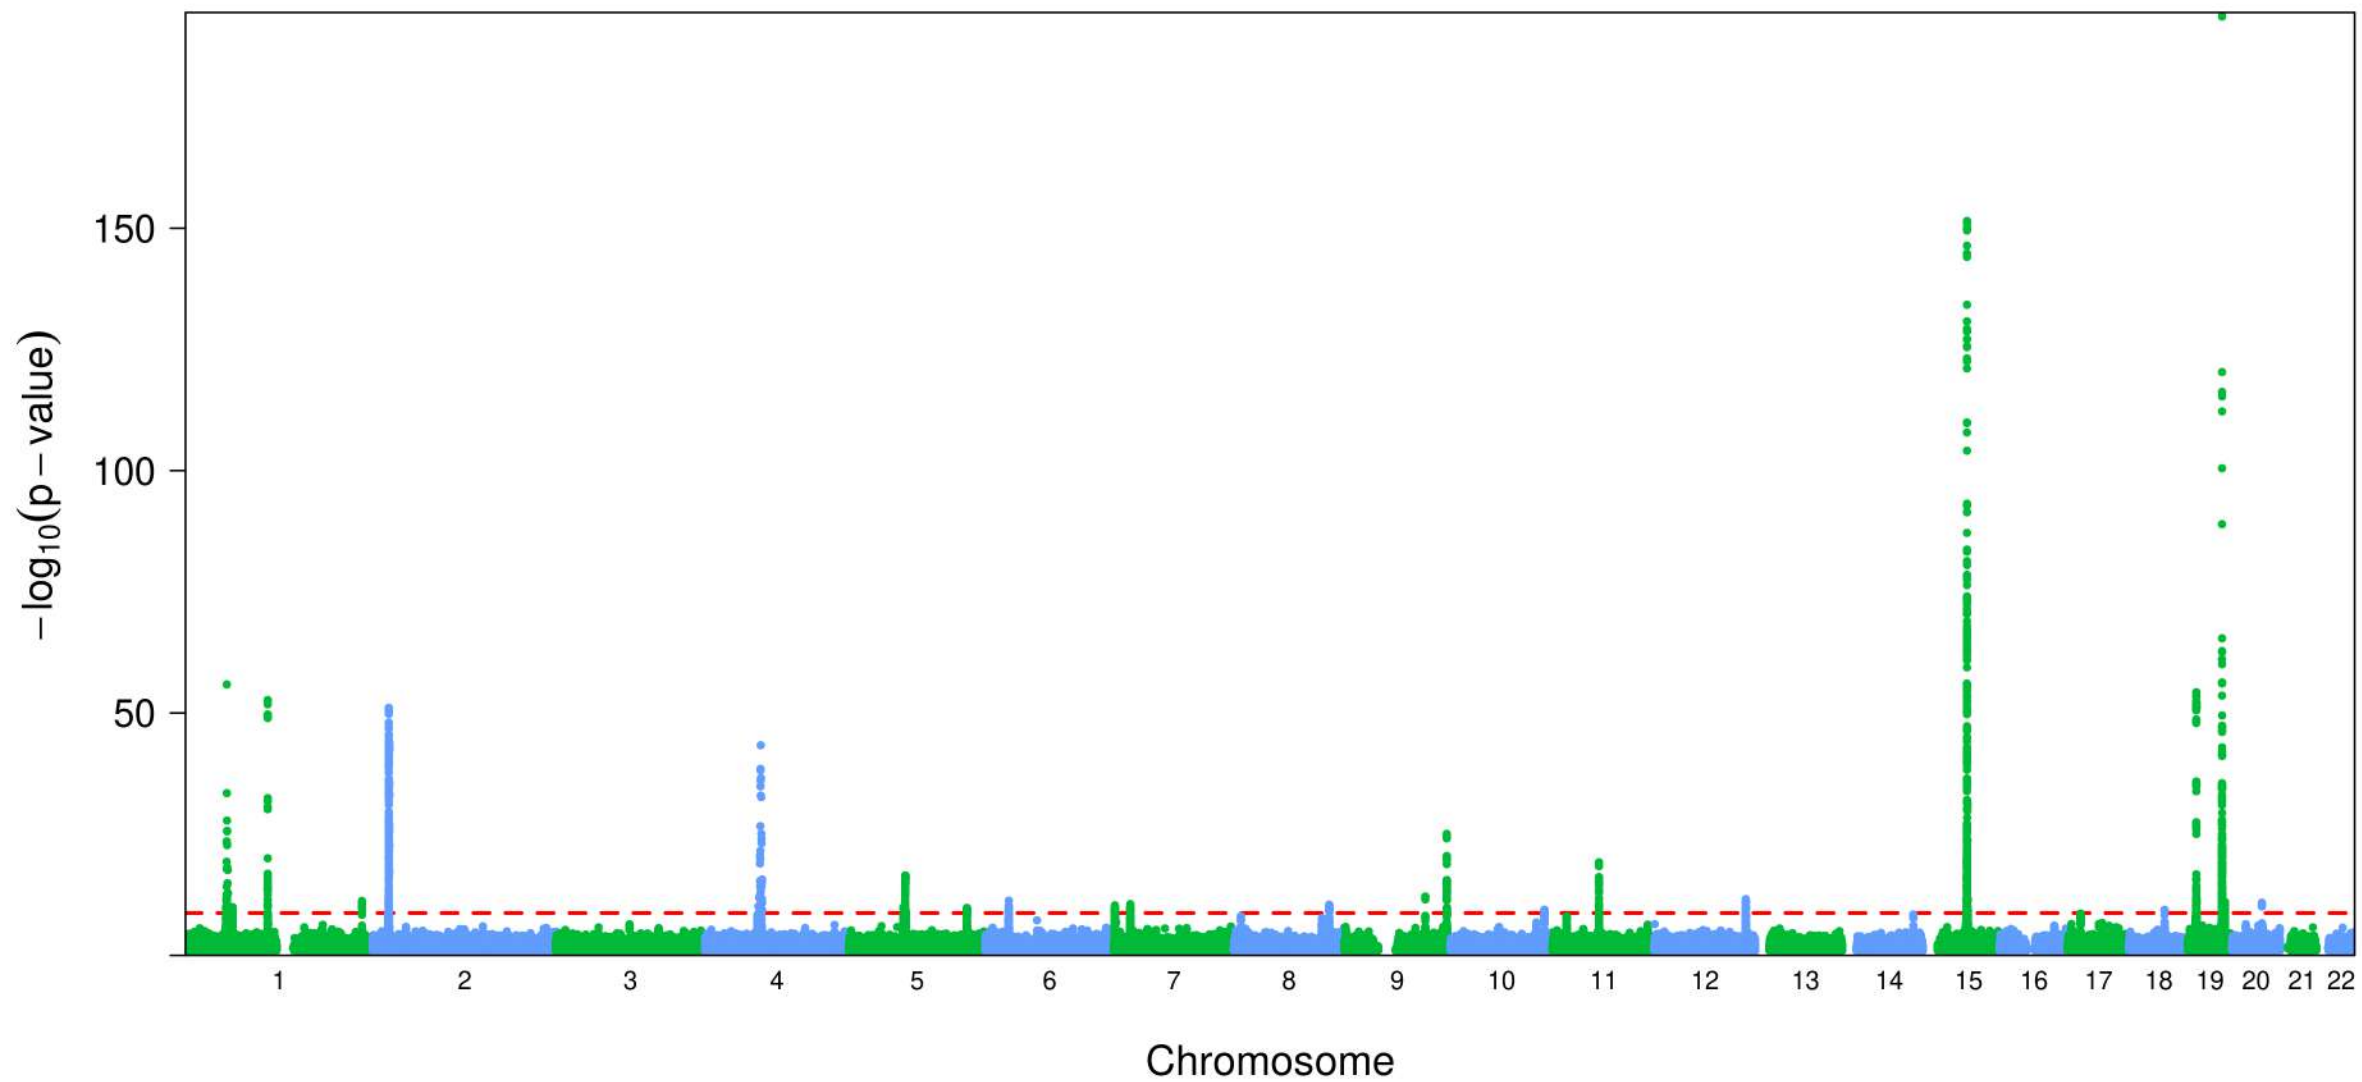

# L-VLDL-TG

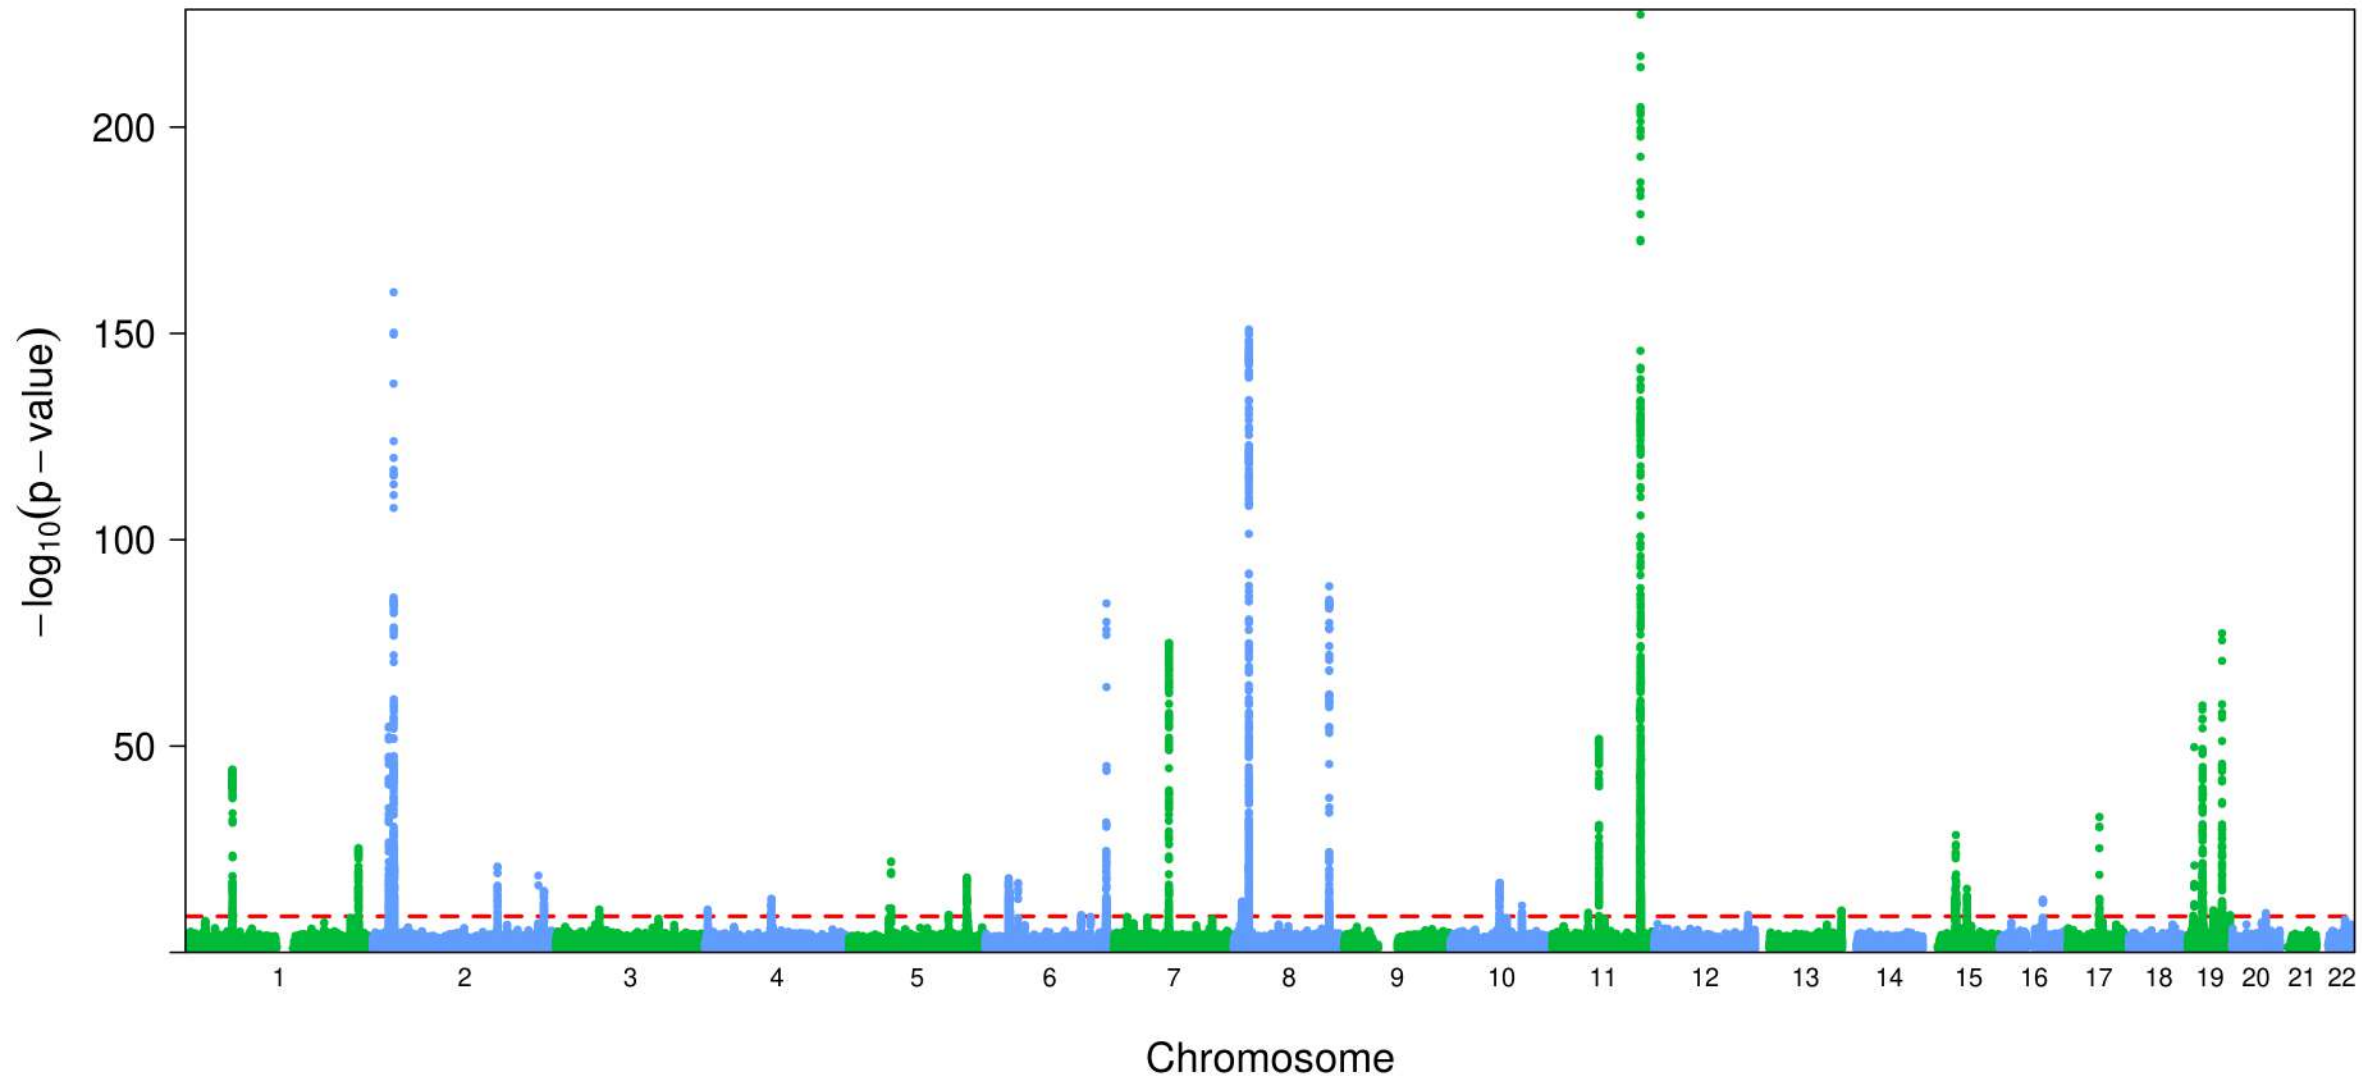



LA

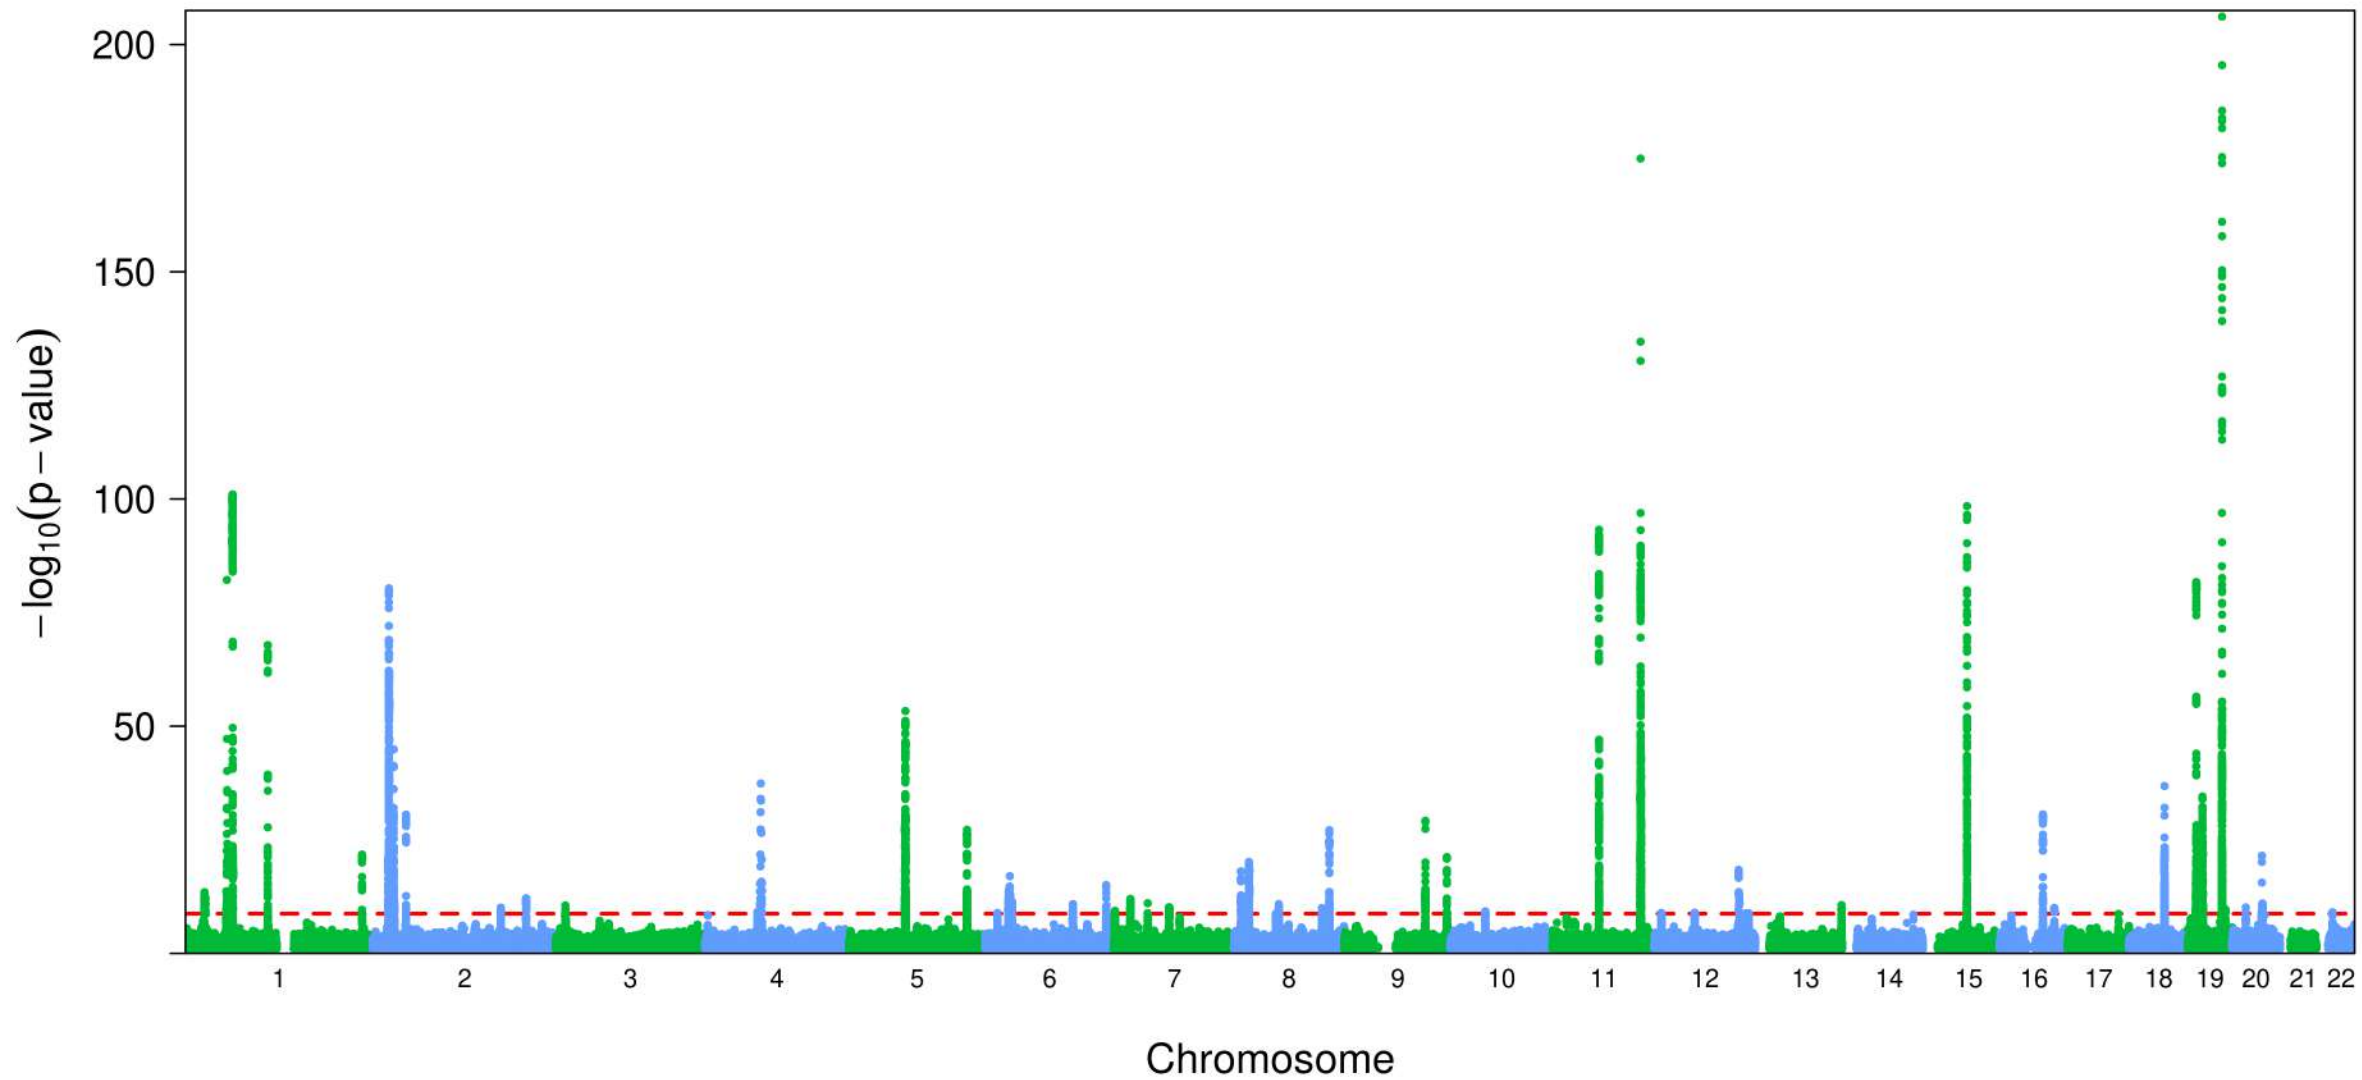

# LAbbyFA

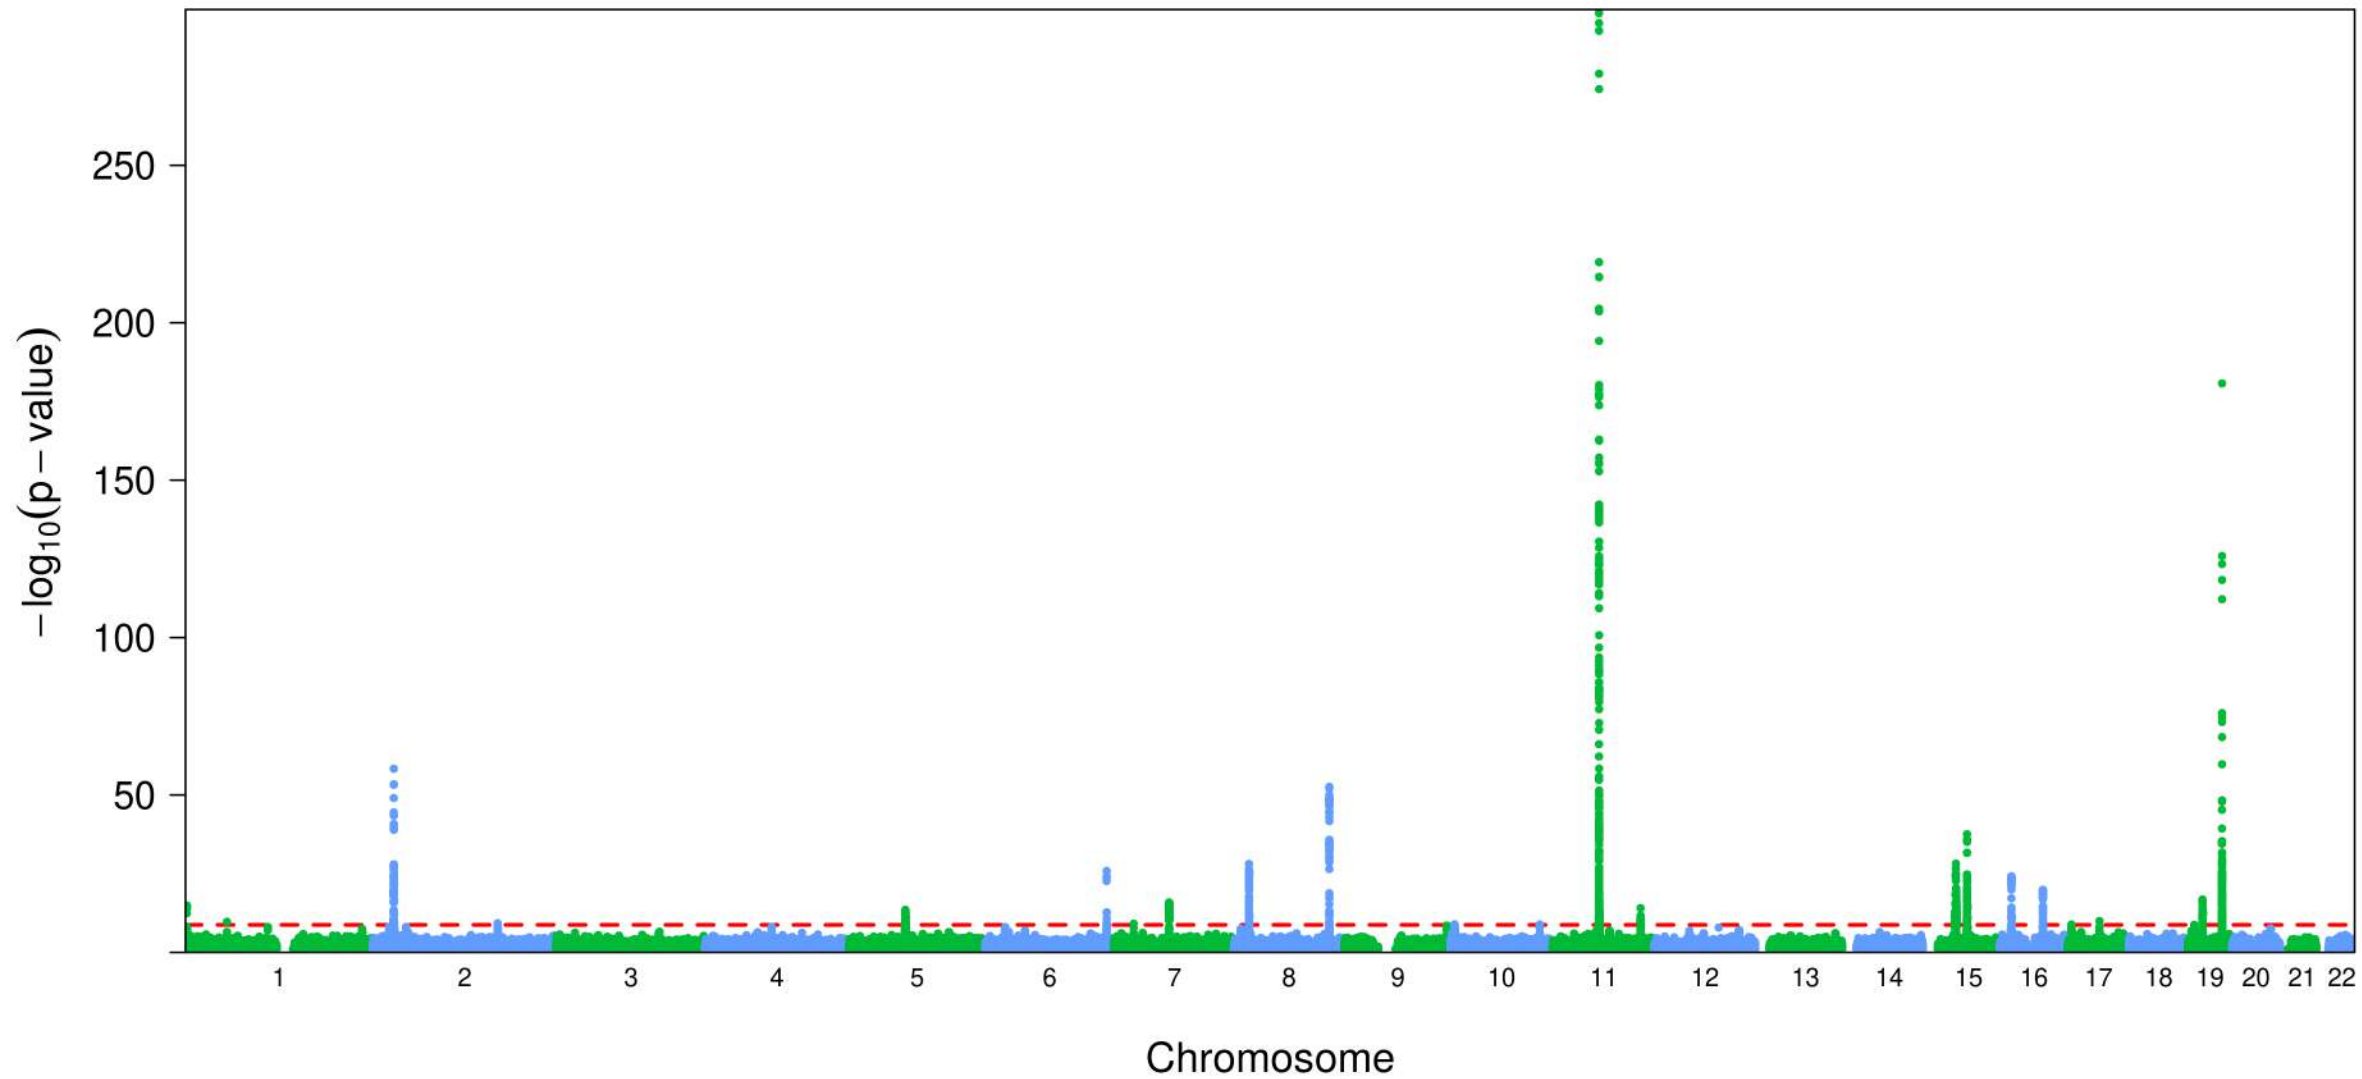

# Lac

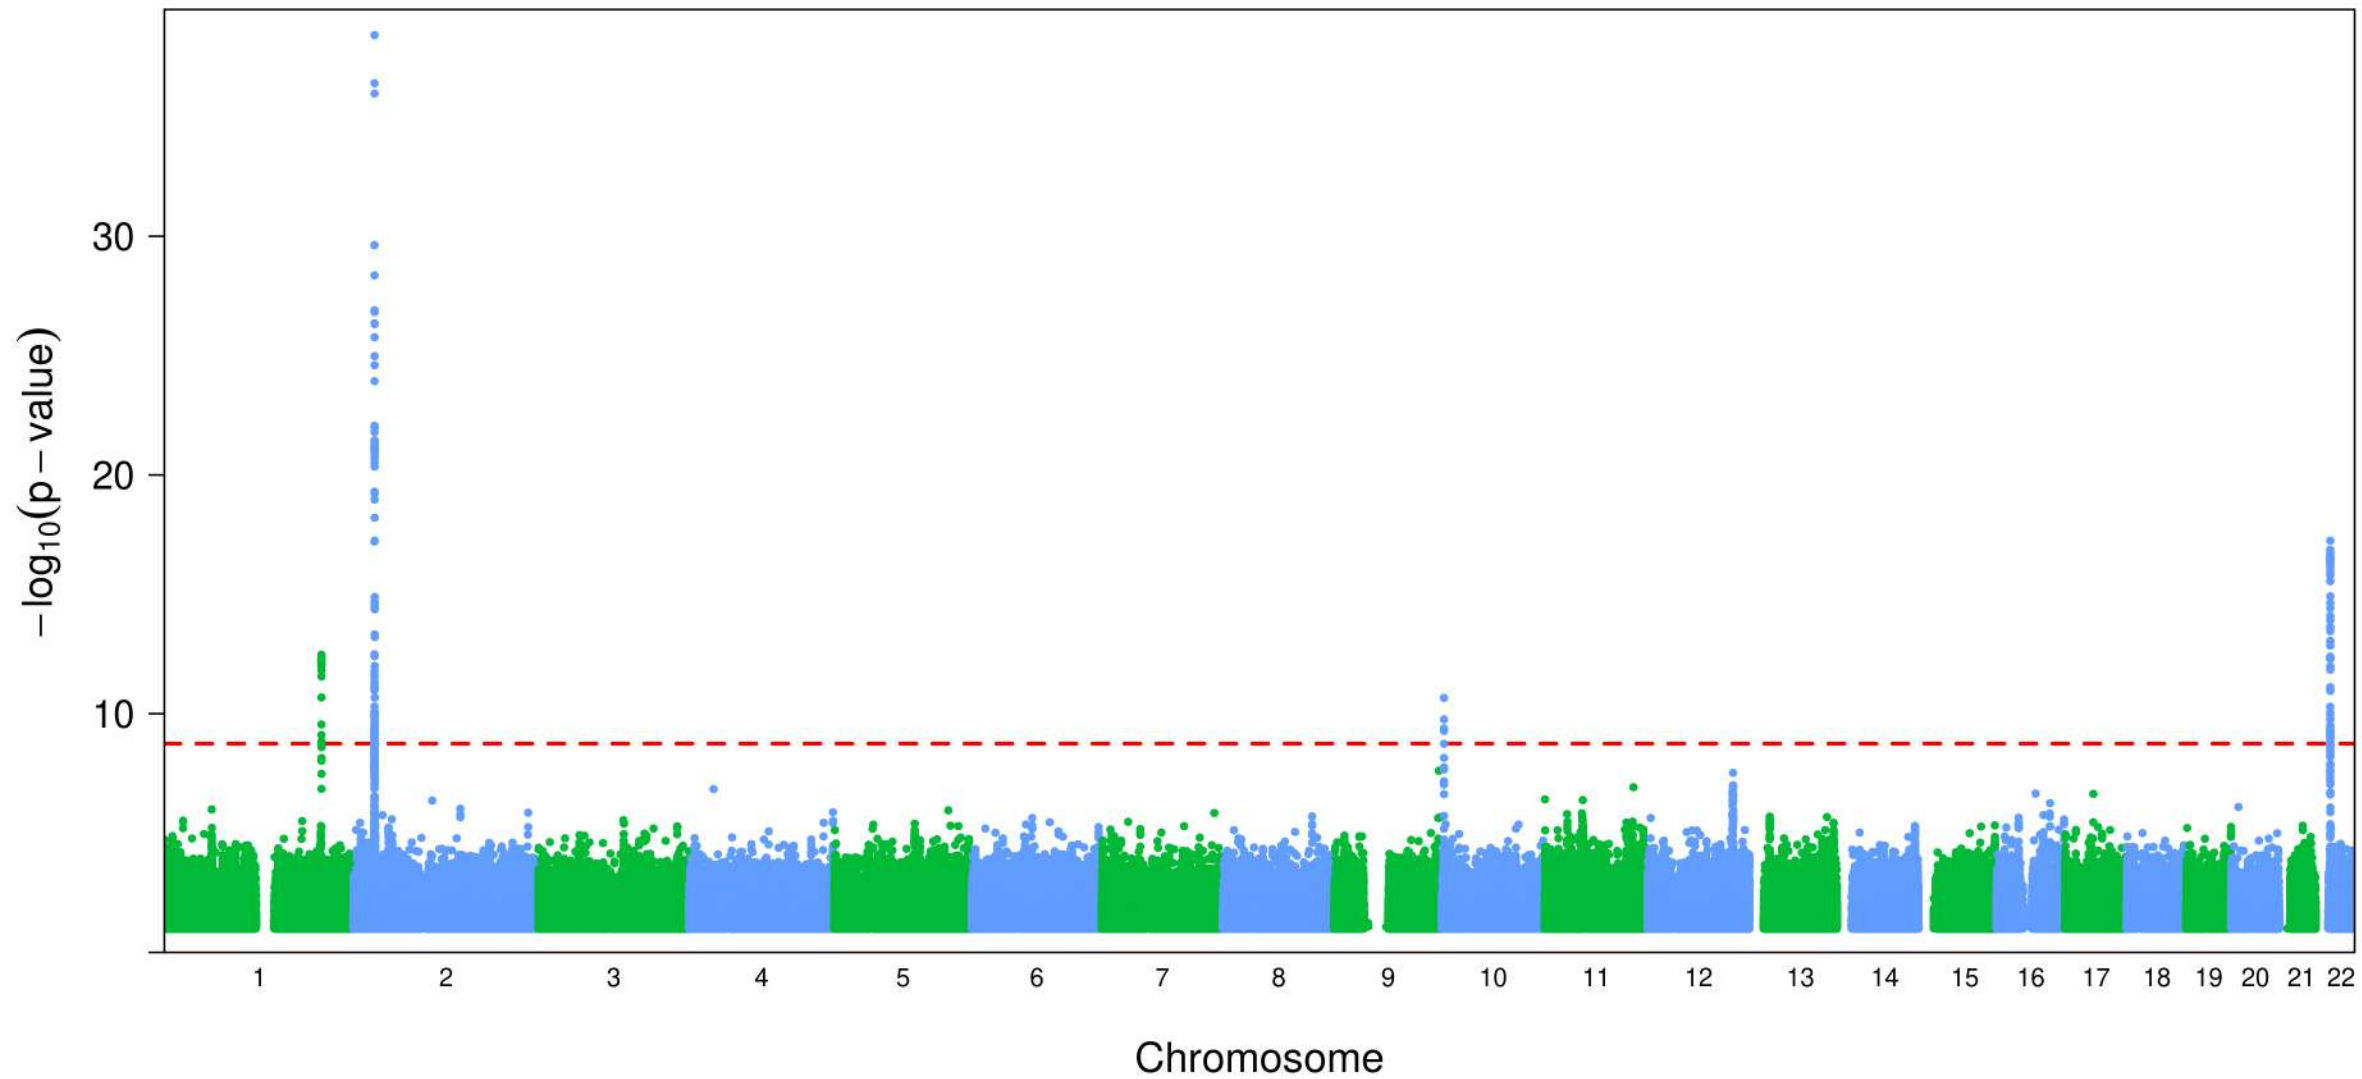

# LDL-C

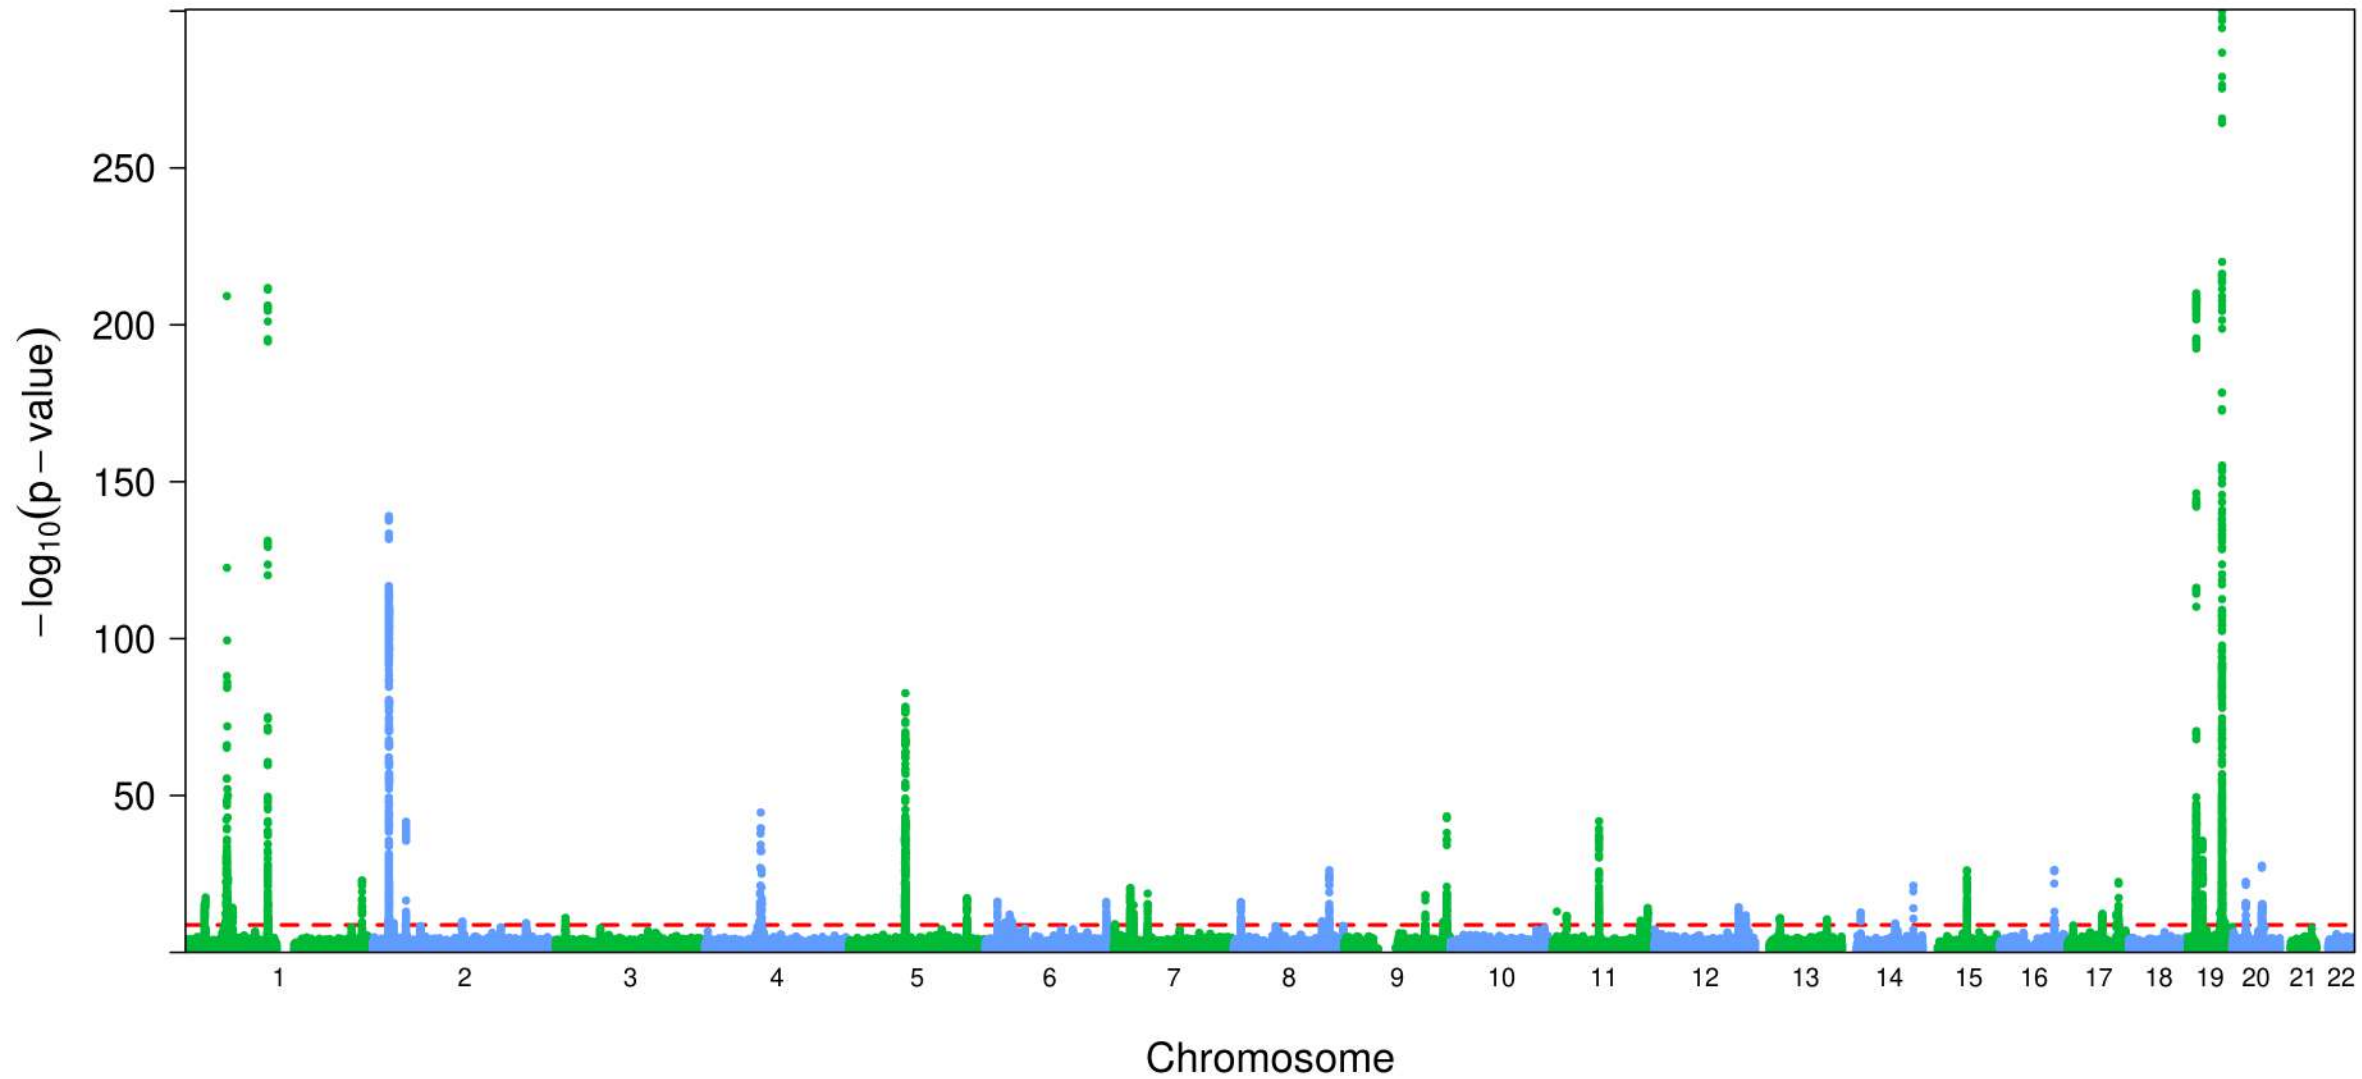

# LDL-D

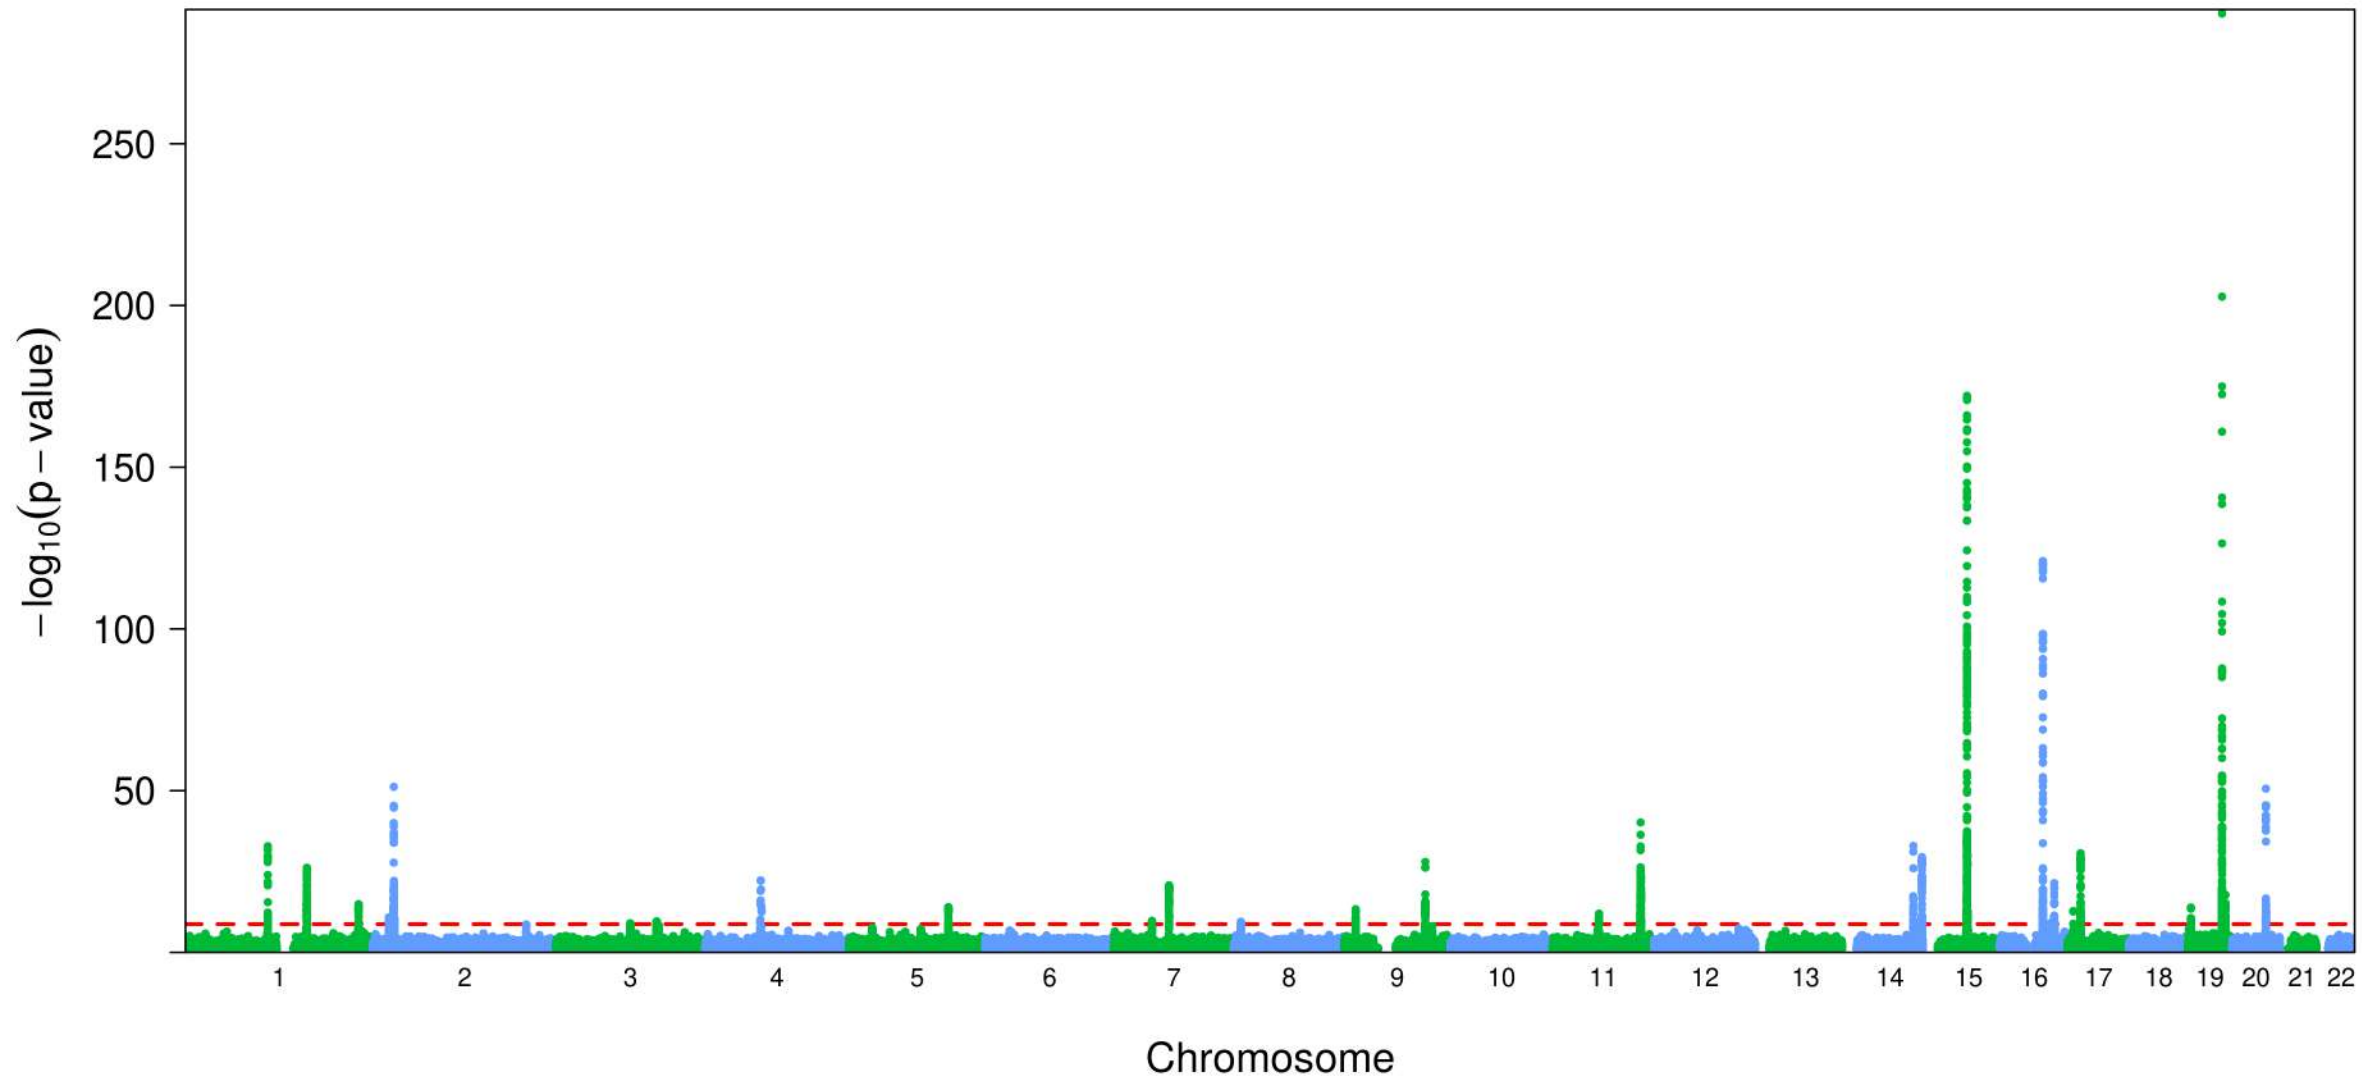



# LDL-TG

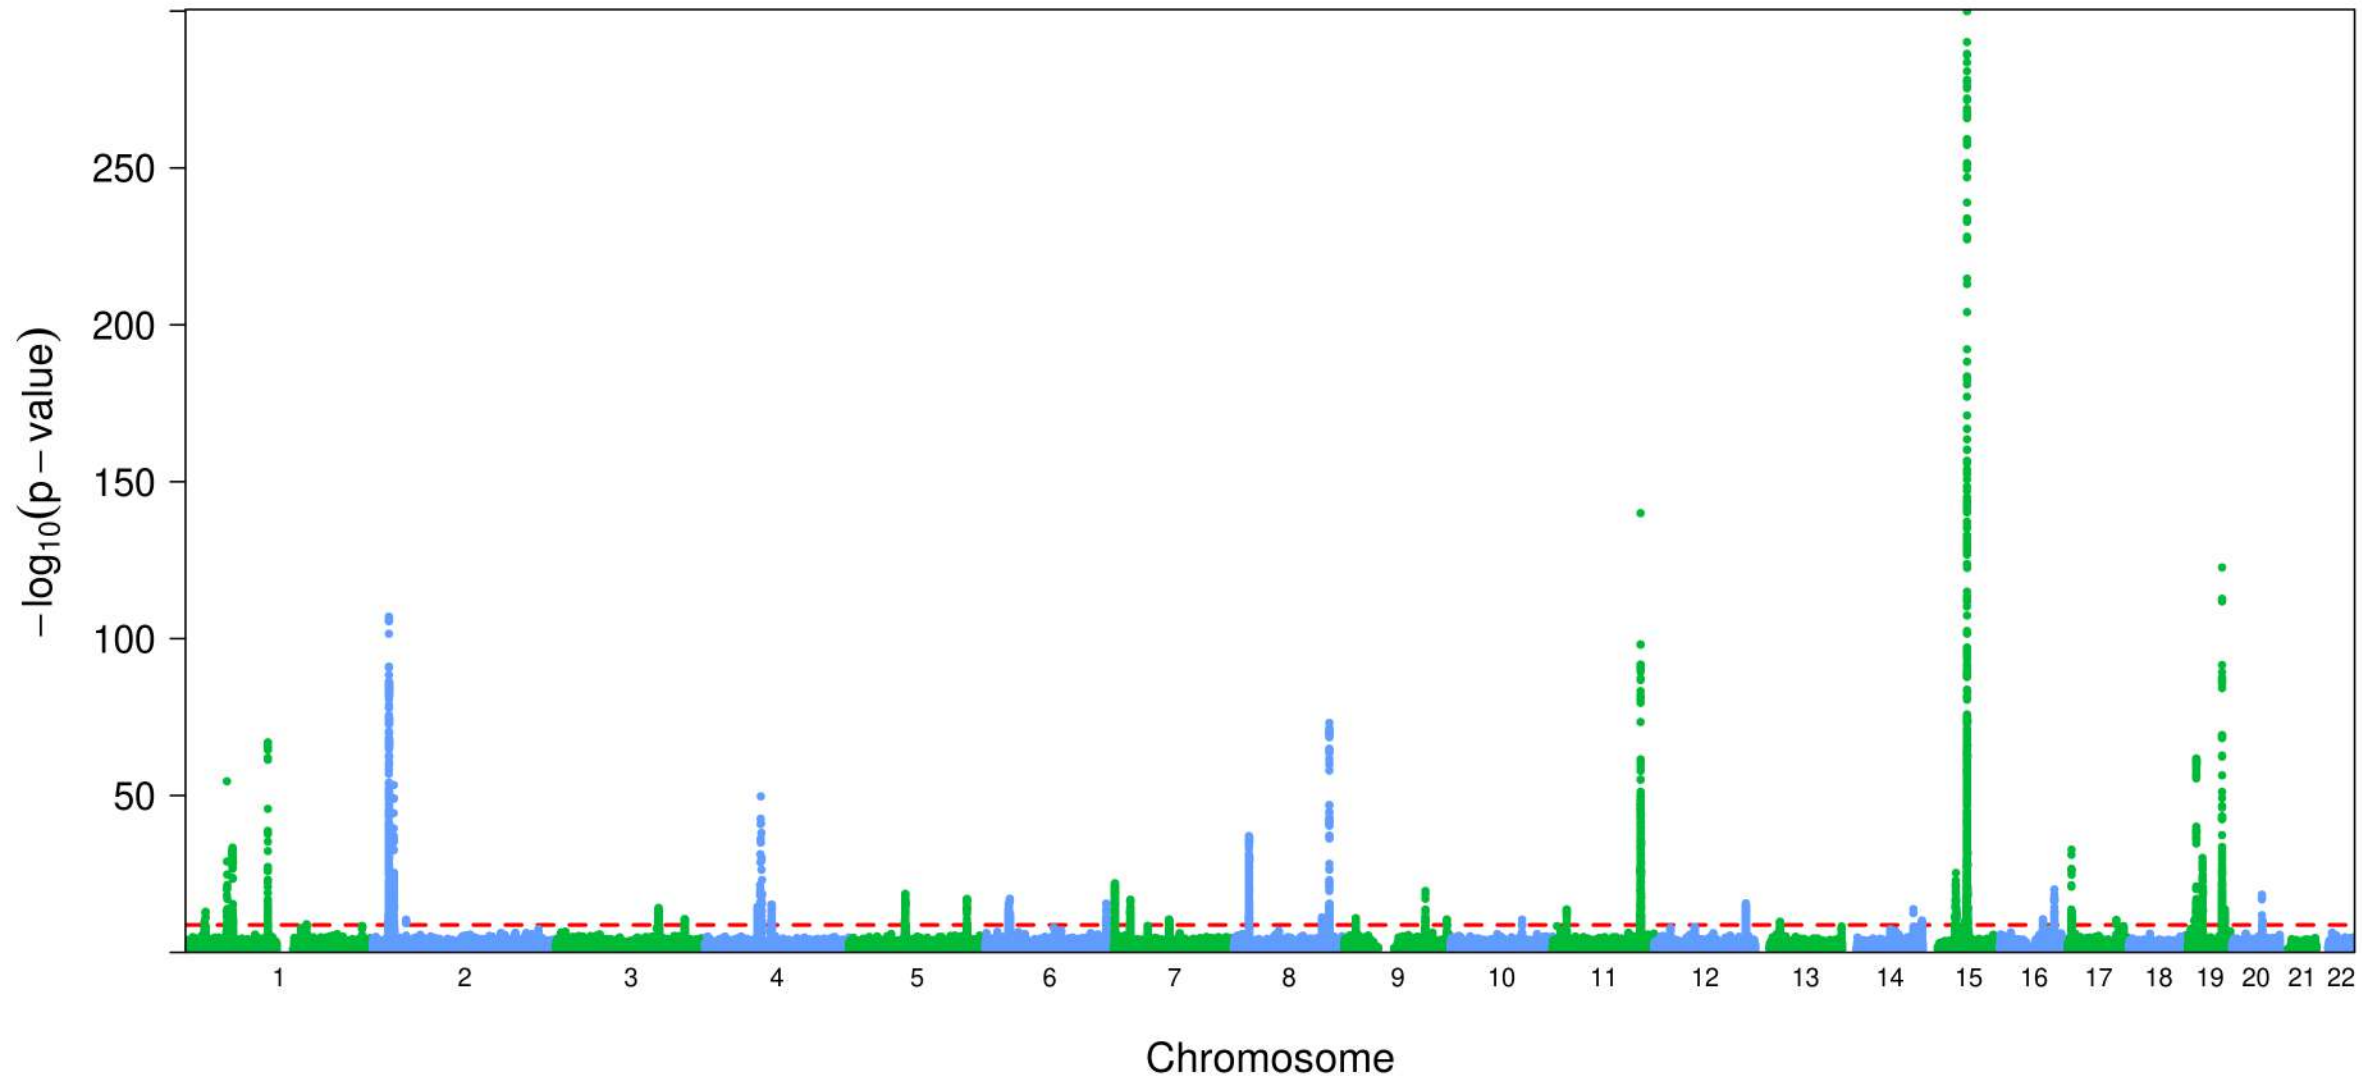

# Leu

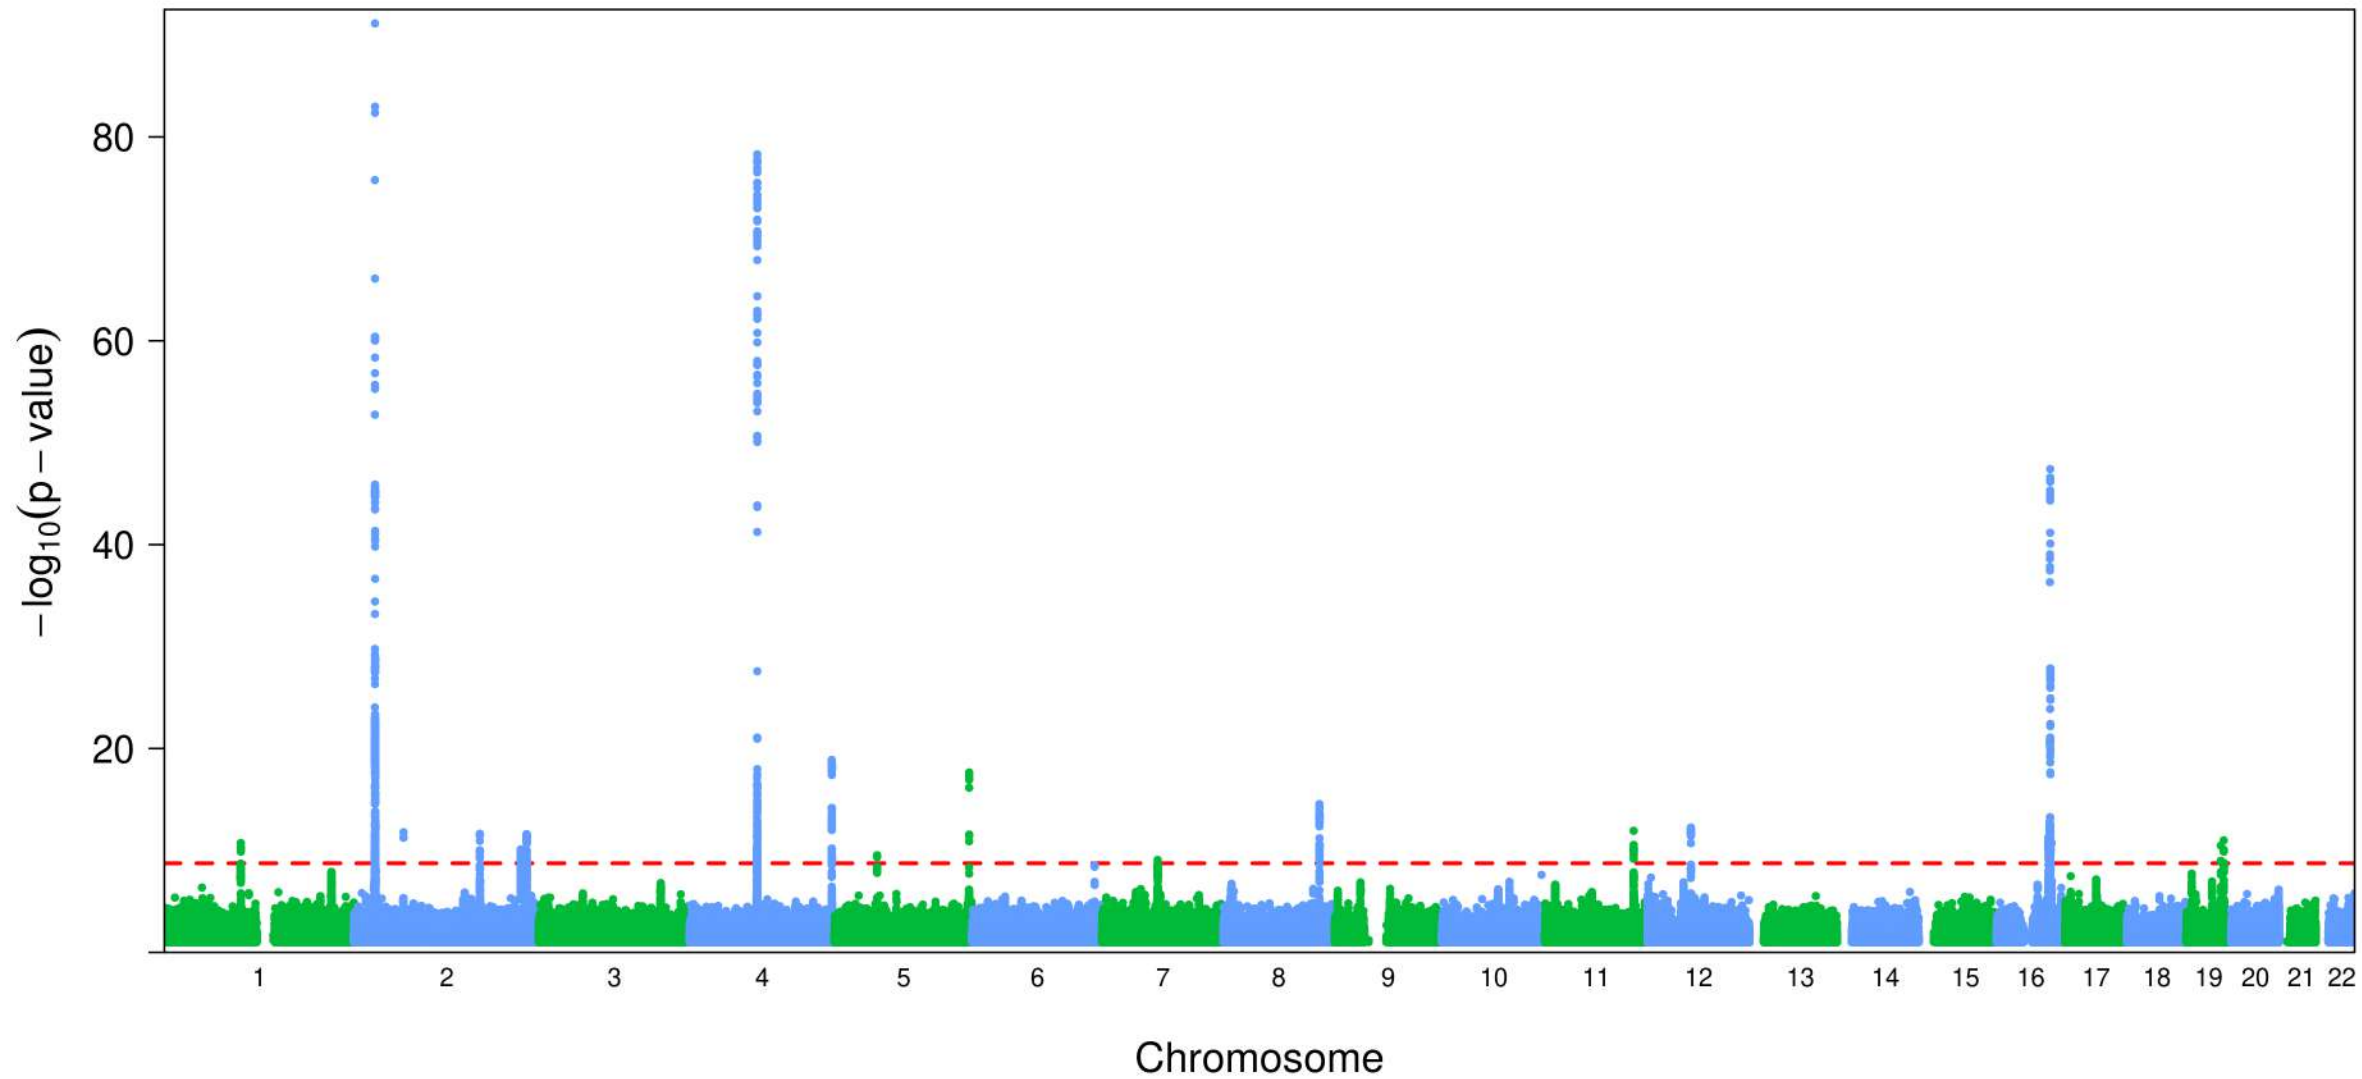

# M-HDL-C

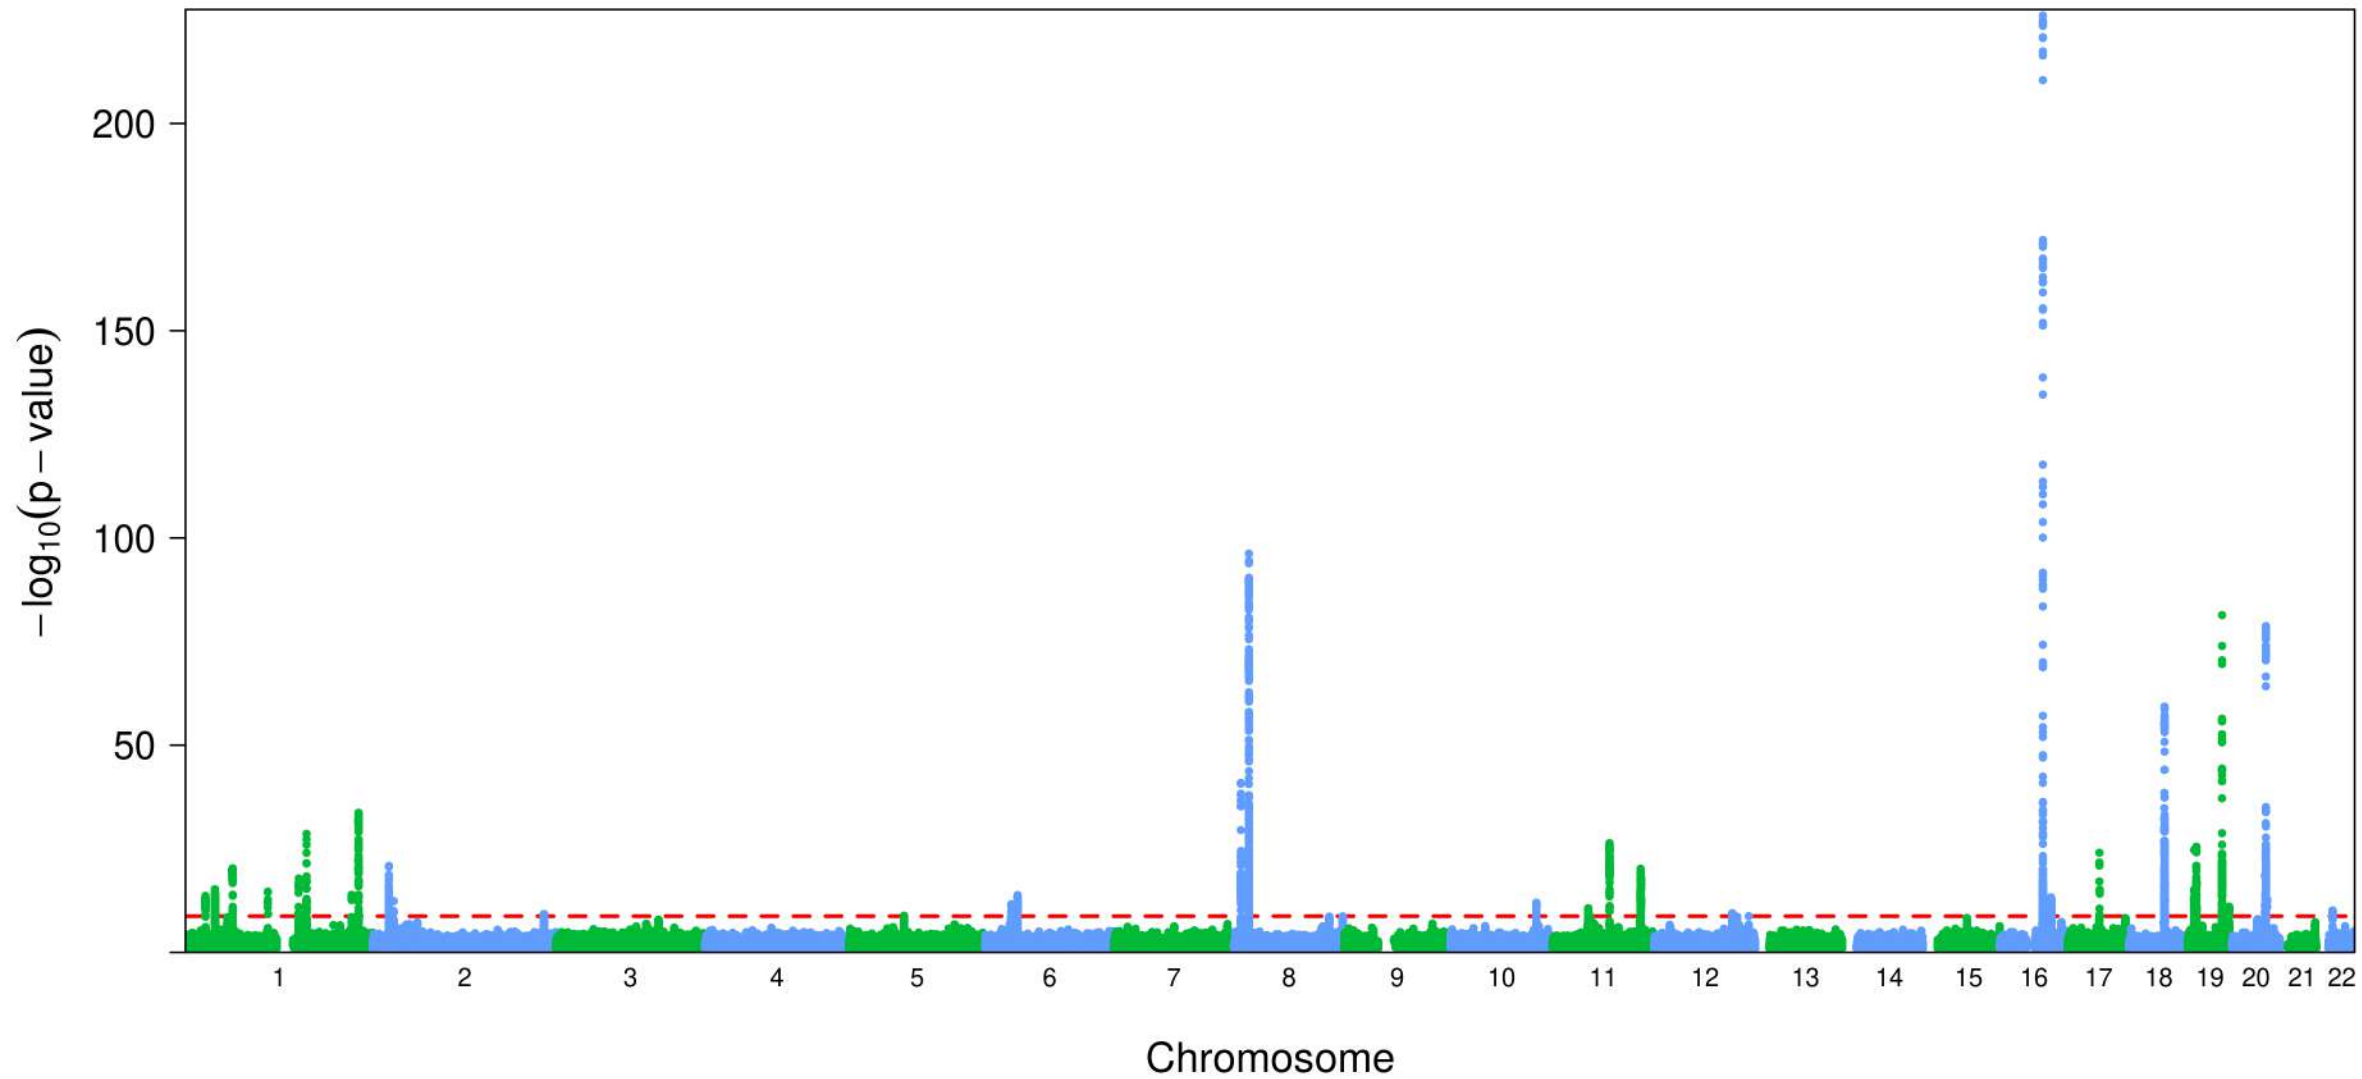

# M-HDL-C\_percent

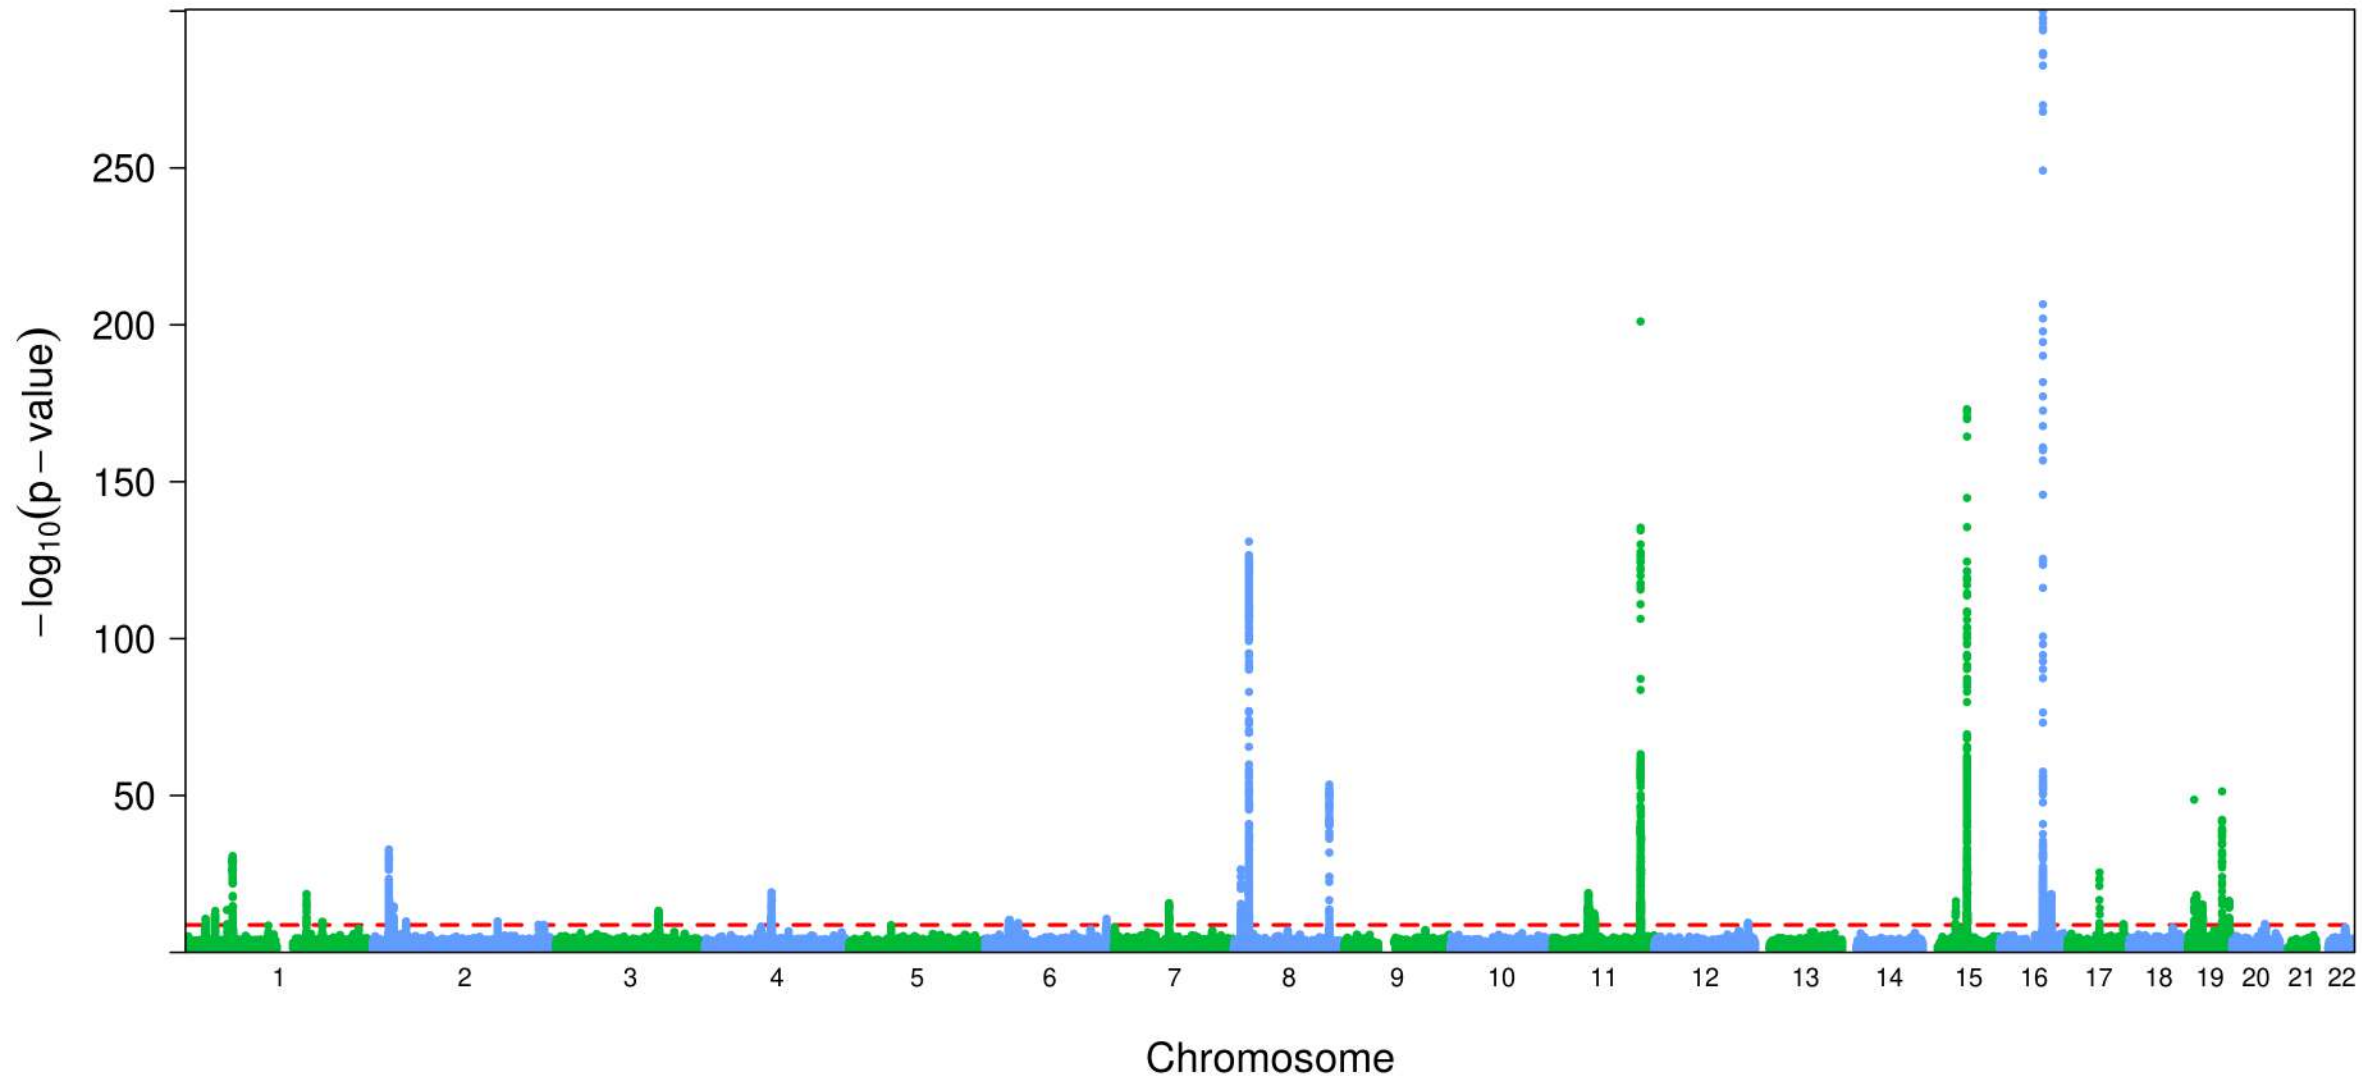

# M-HDL-CE

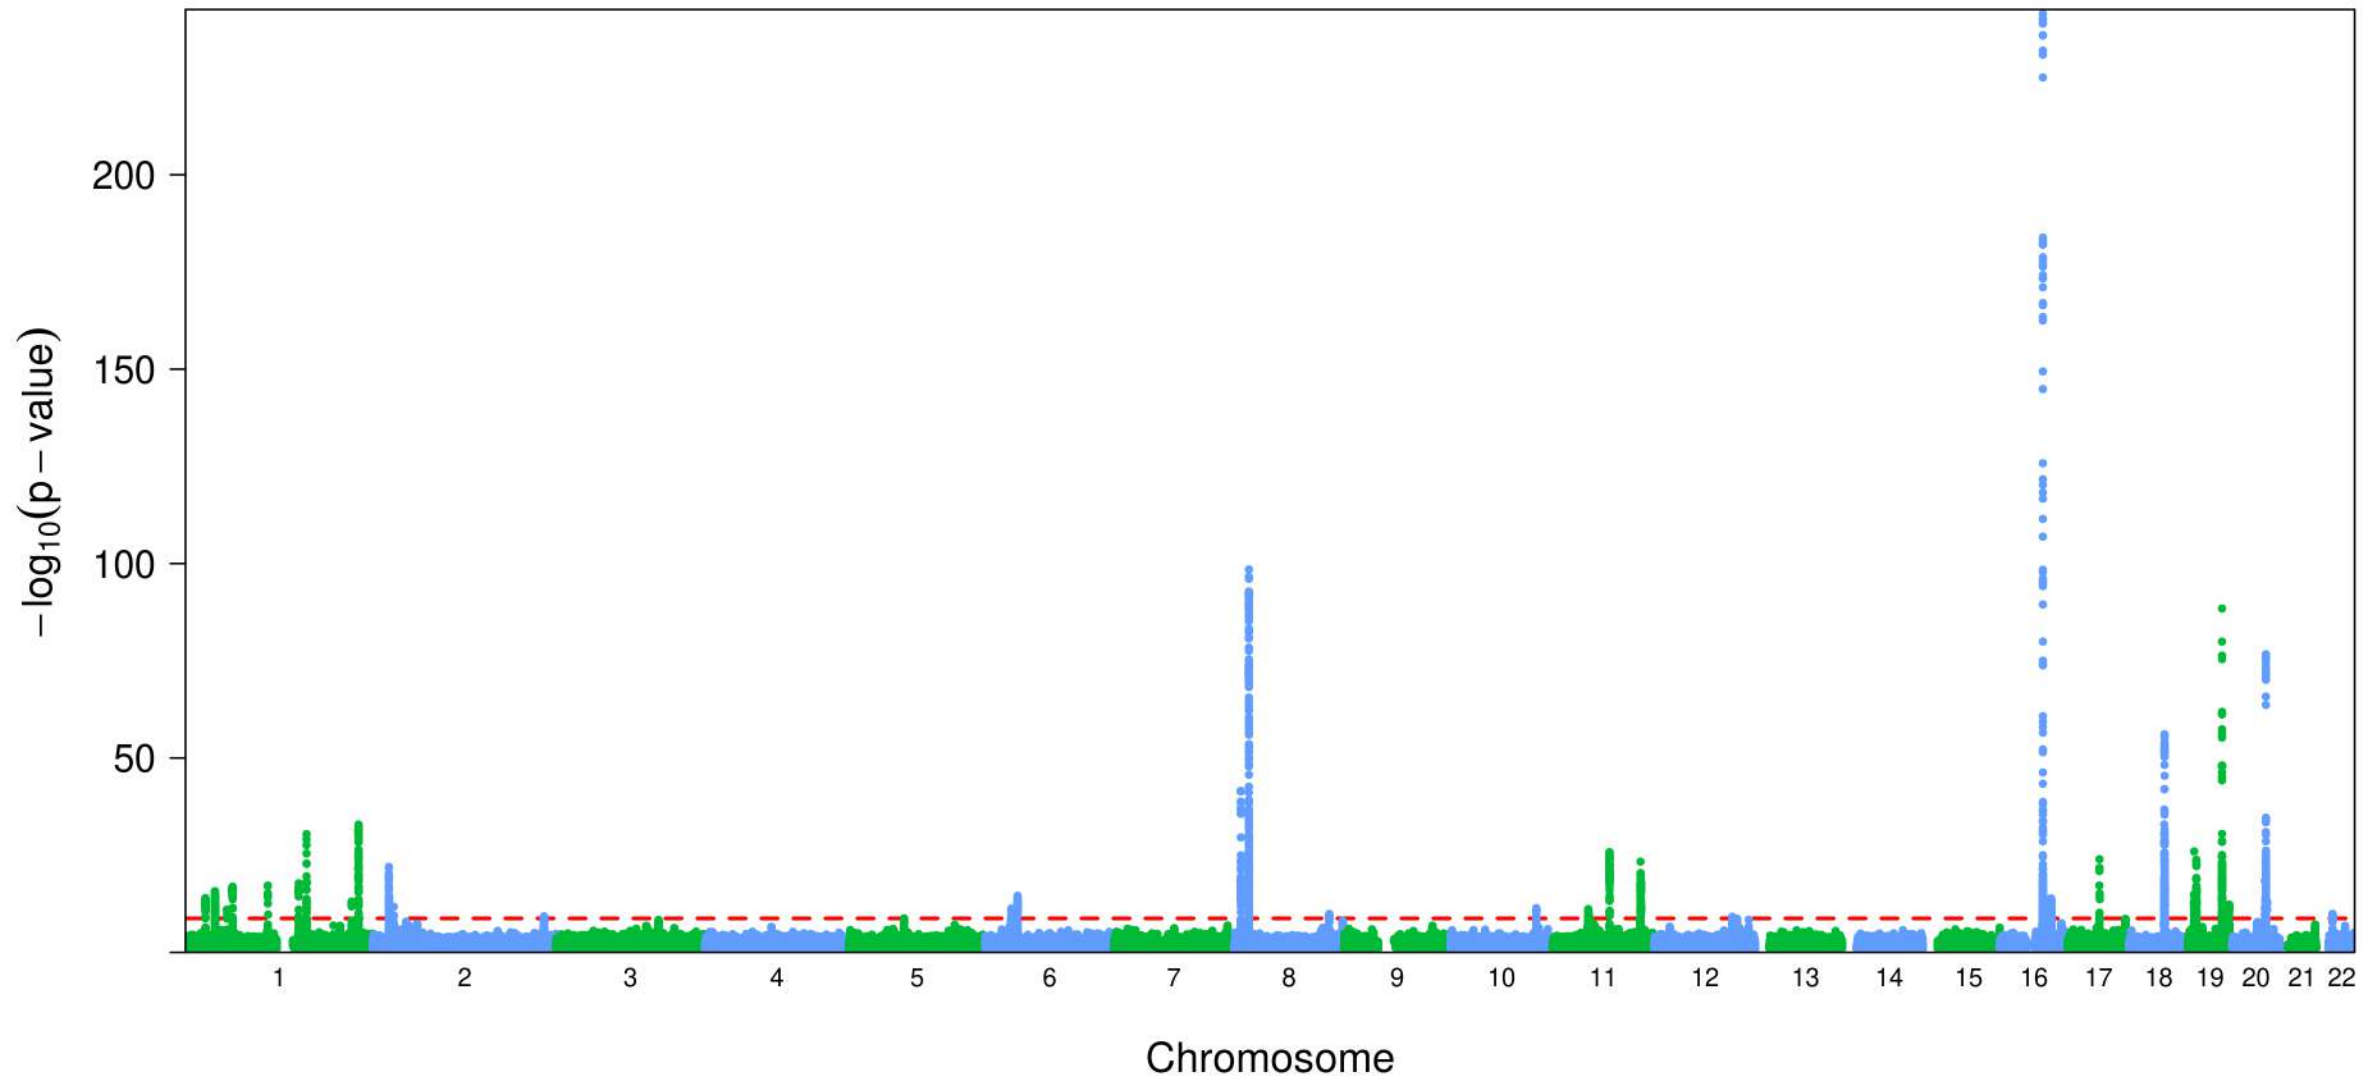

# M-HDL-CE\_percent

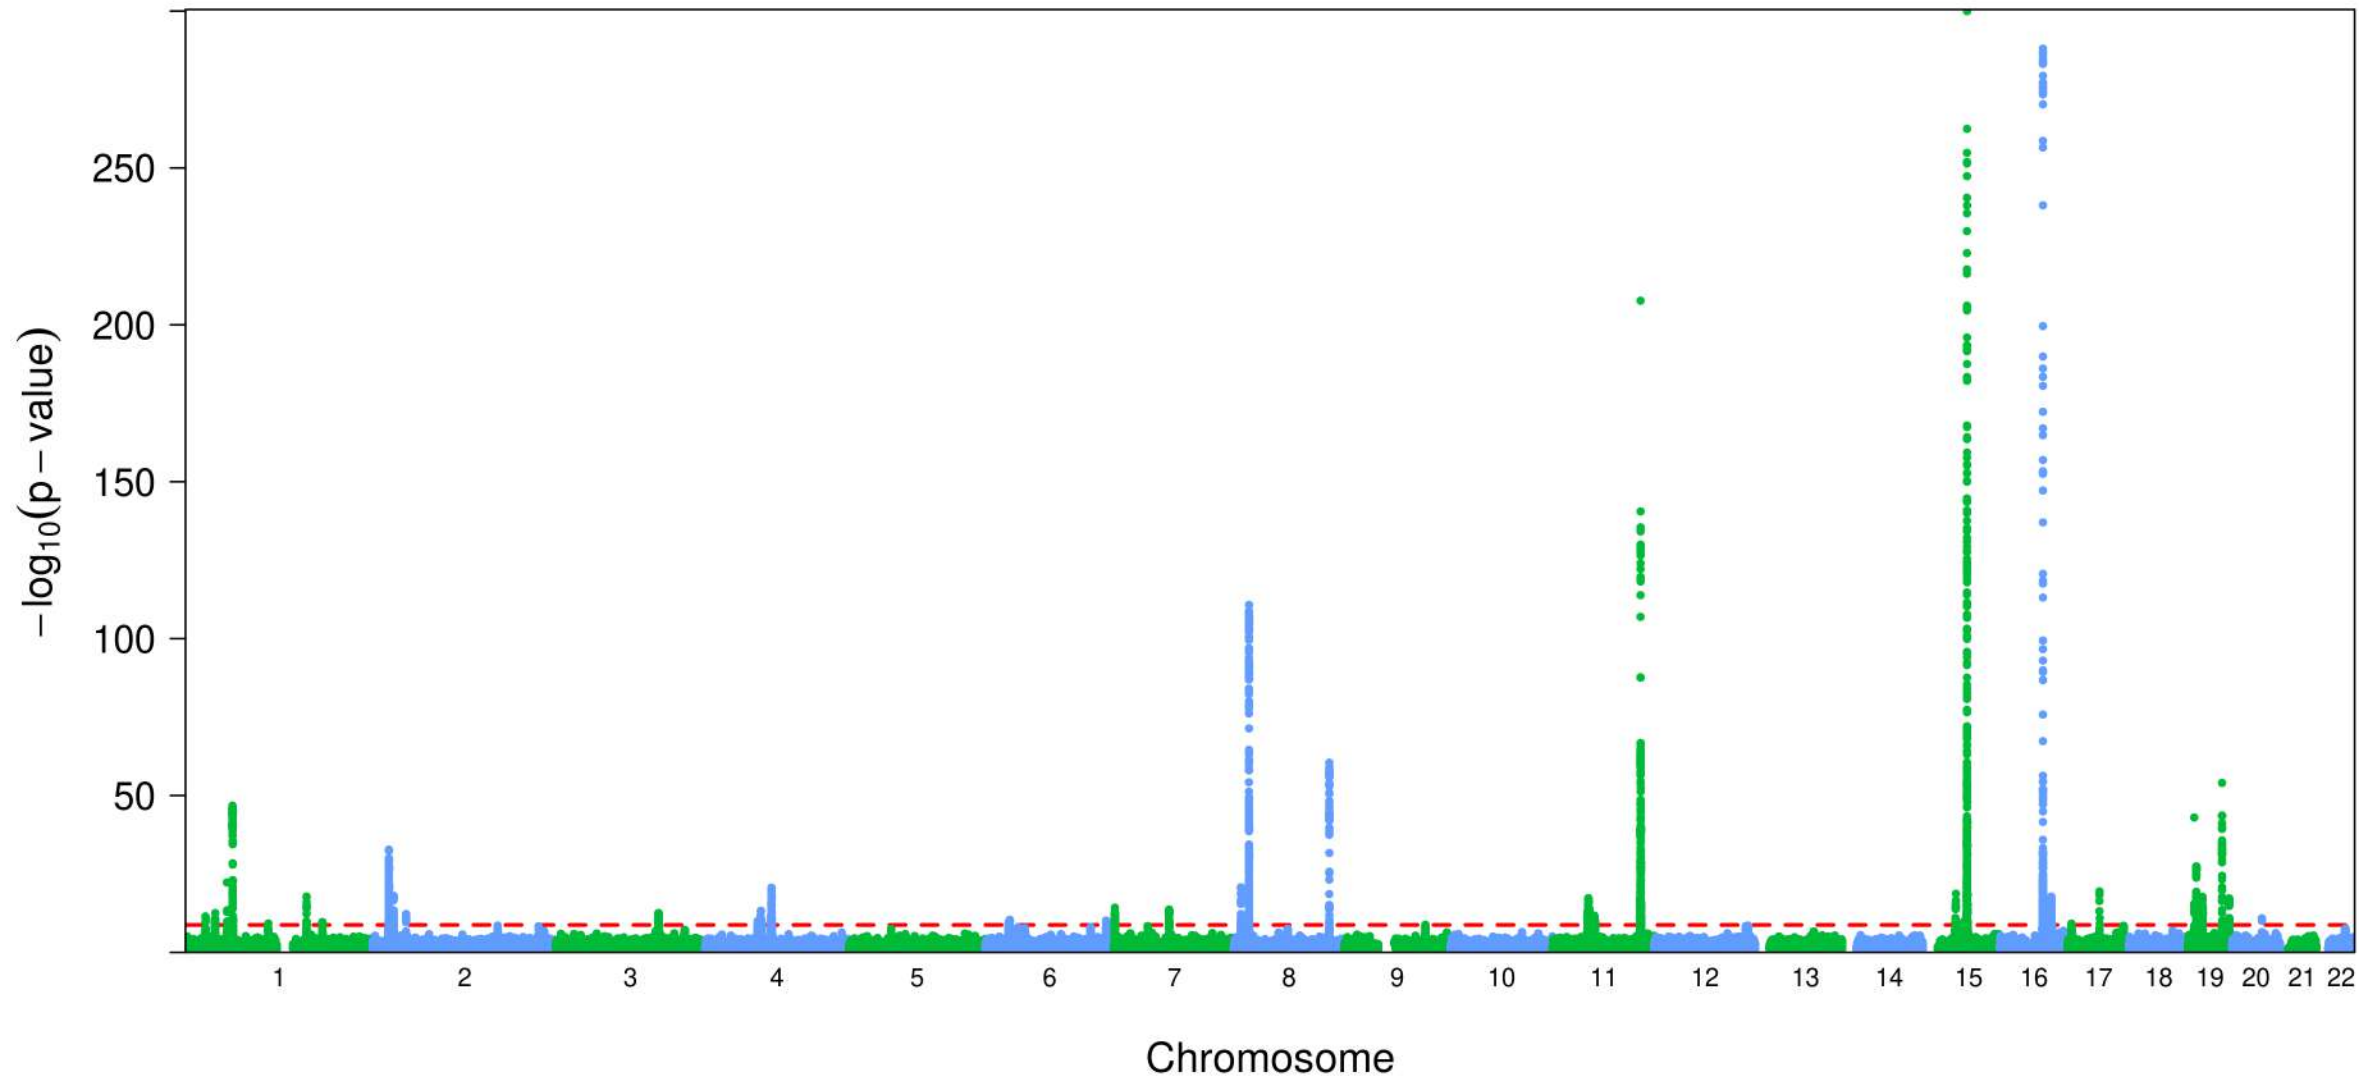

# M-HDL-FC

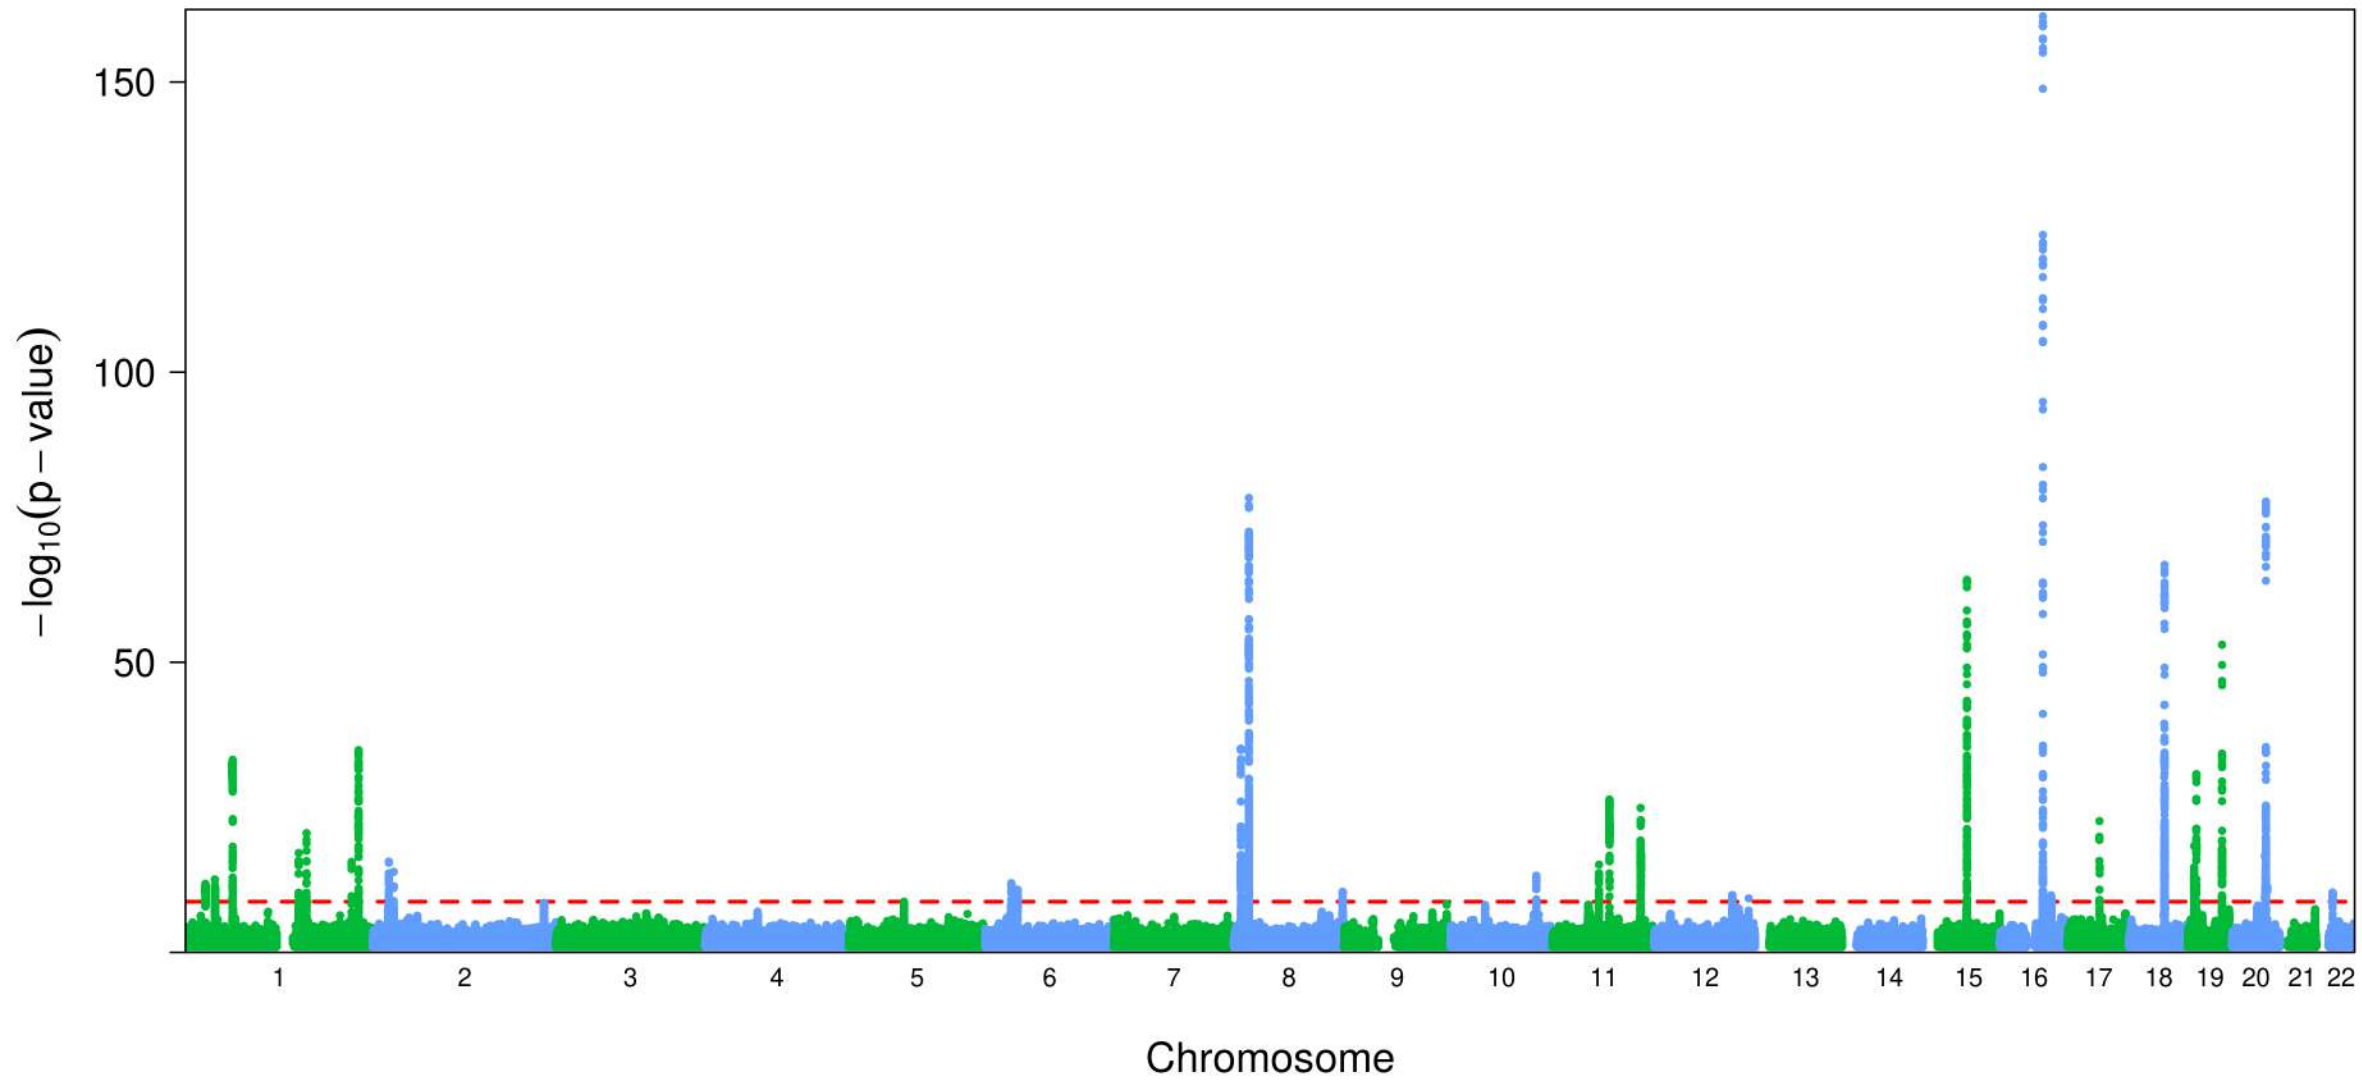

# M-HDL-FC\_percent

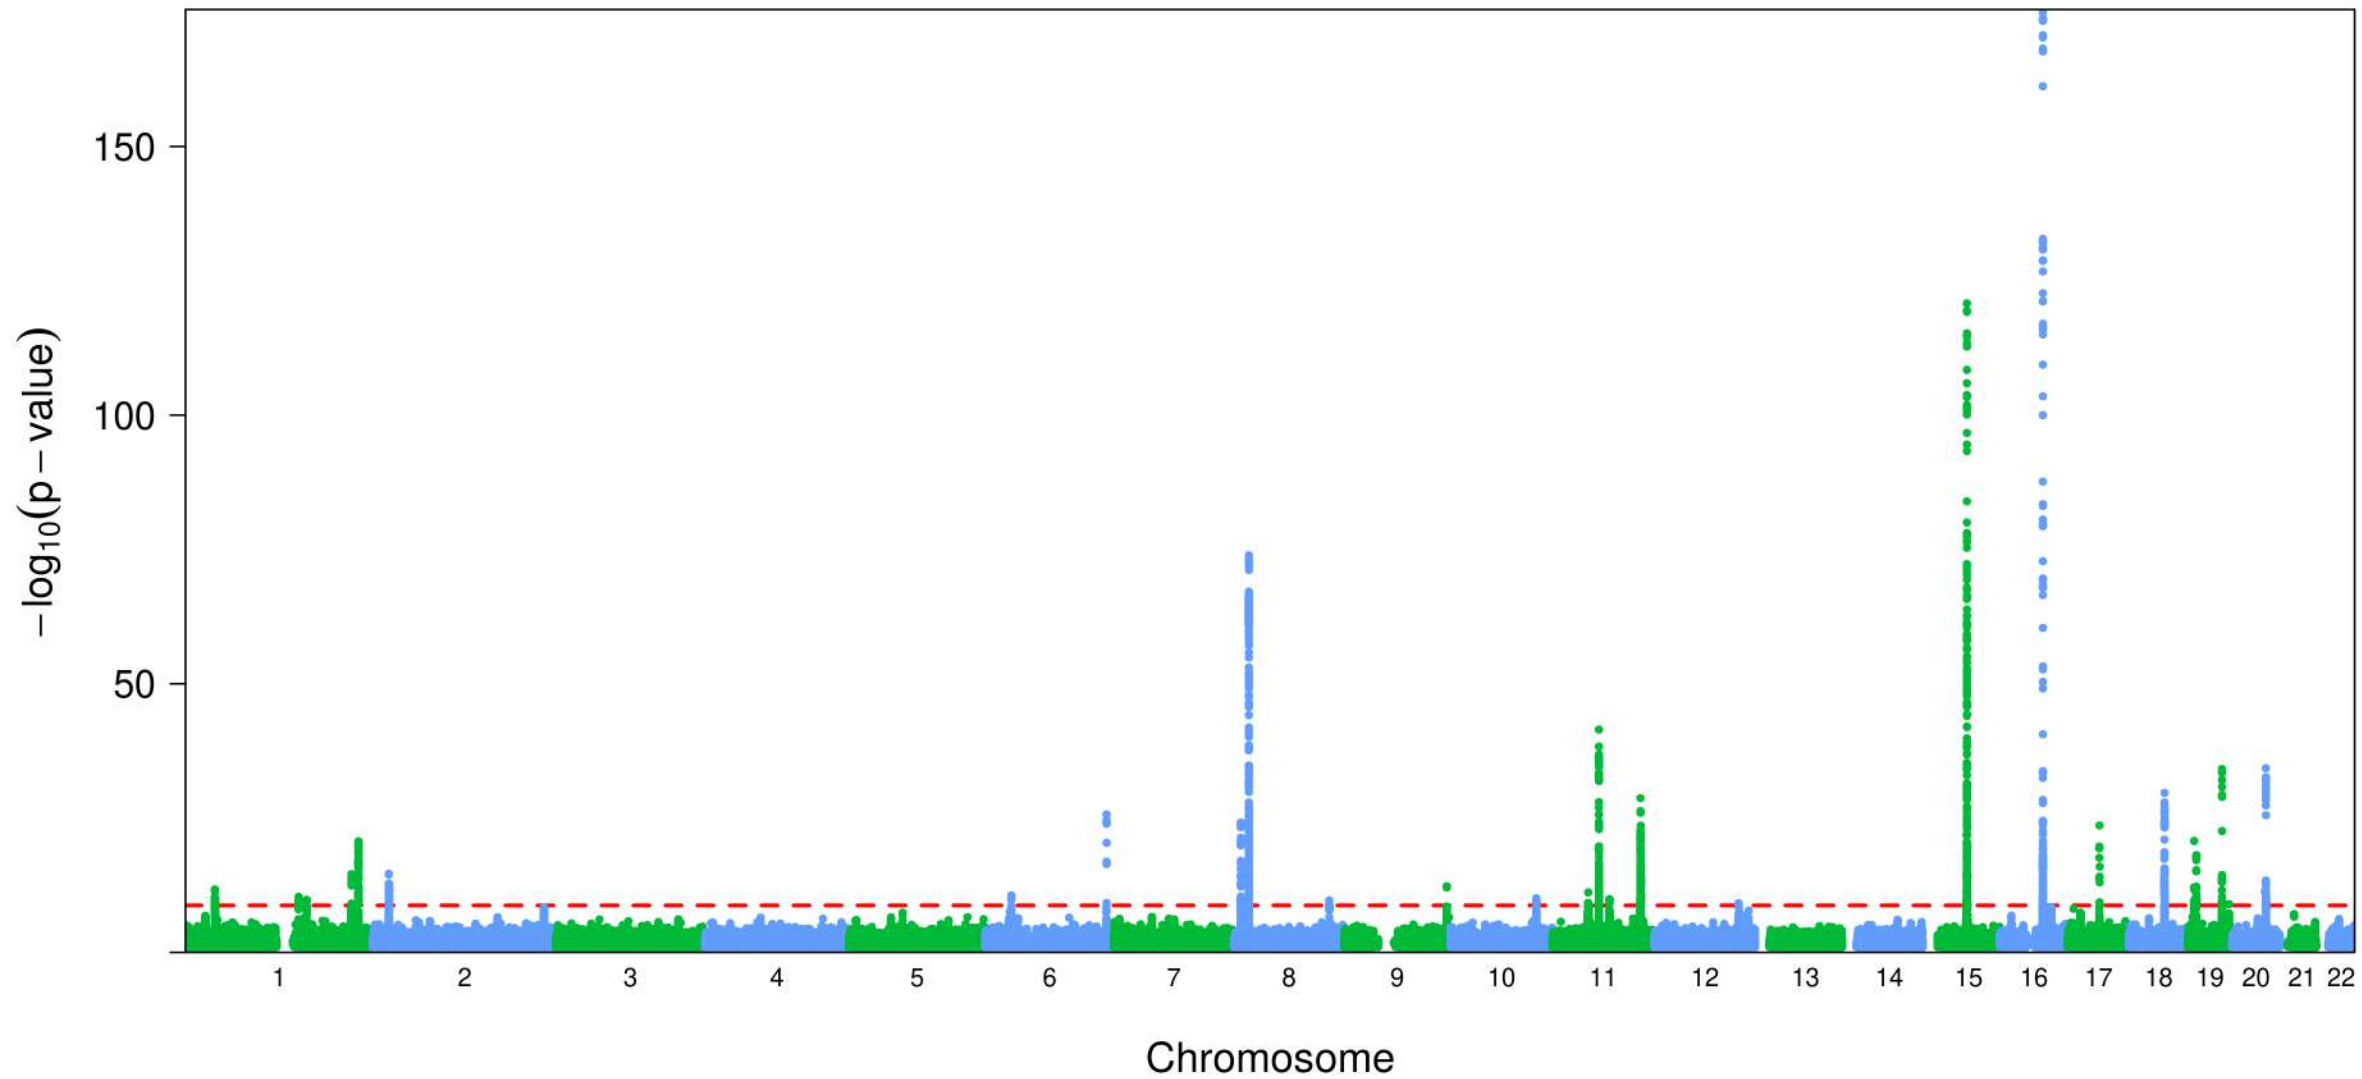



# M-HDL-L

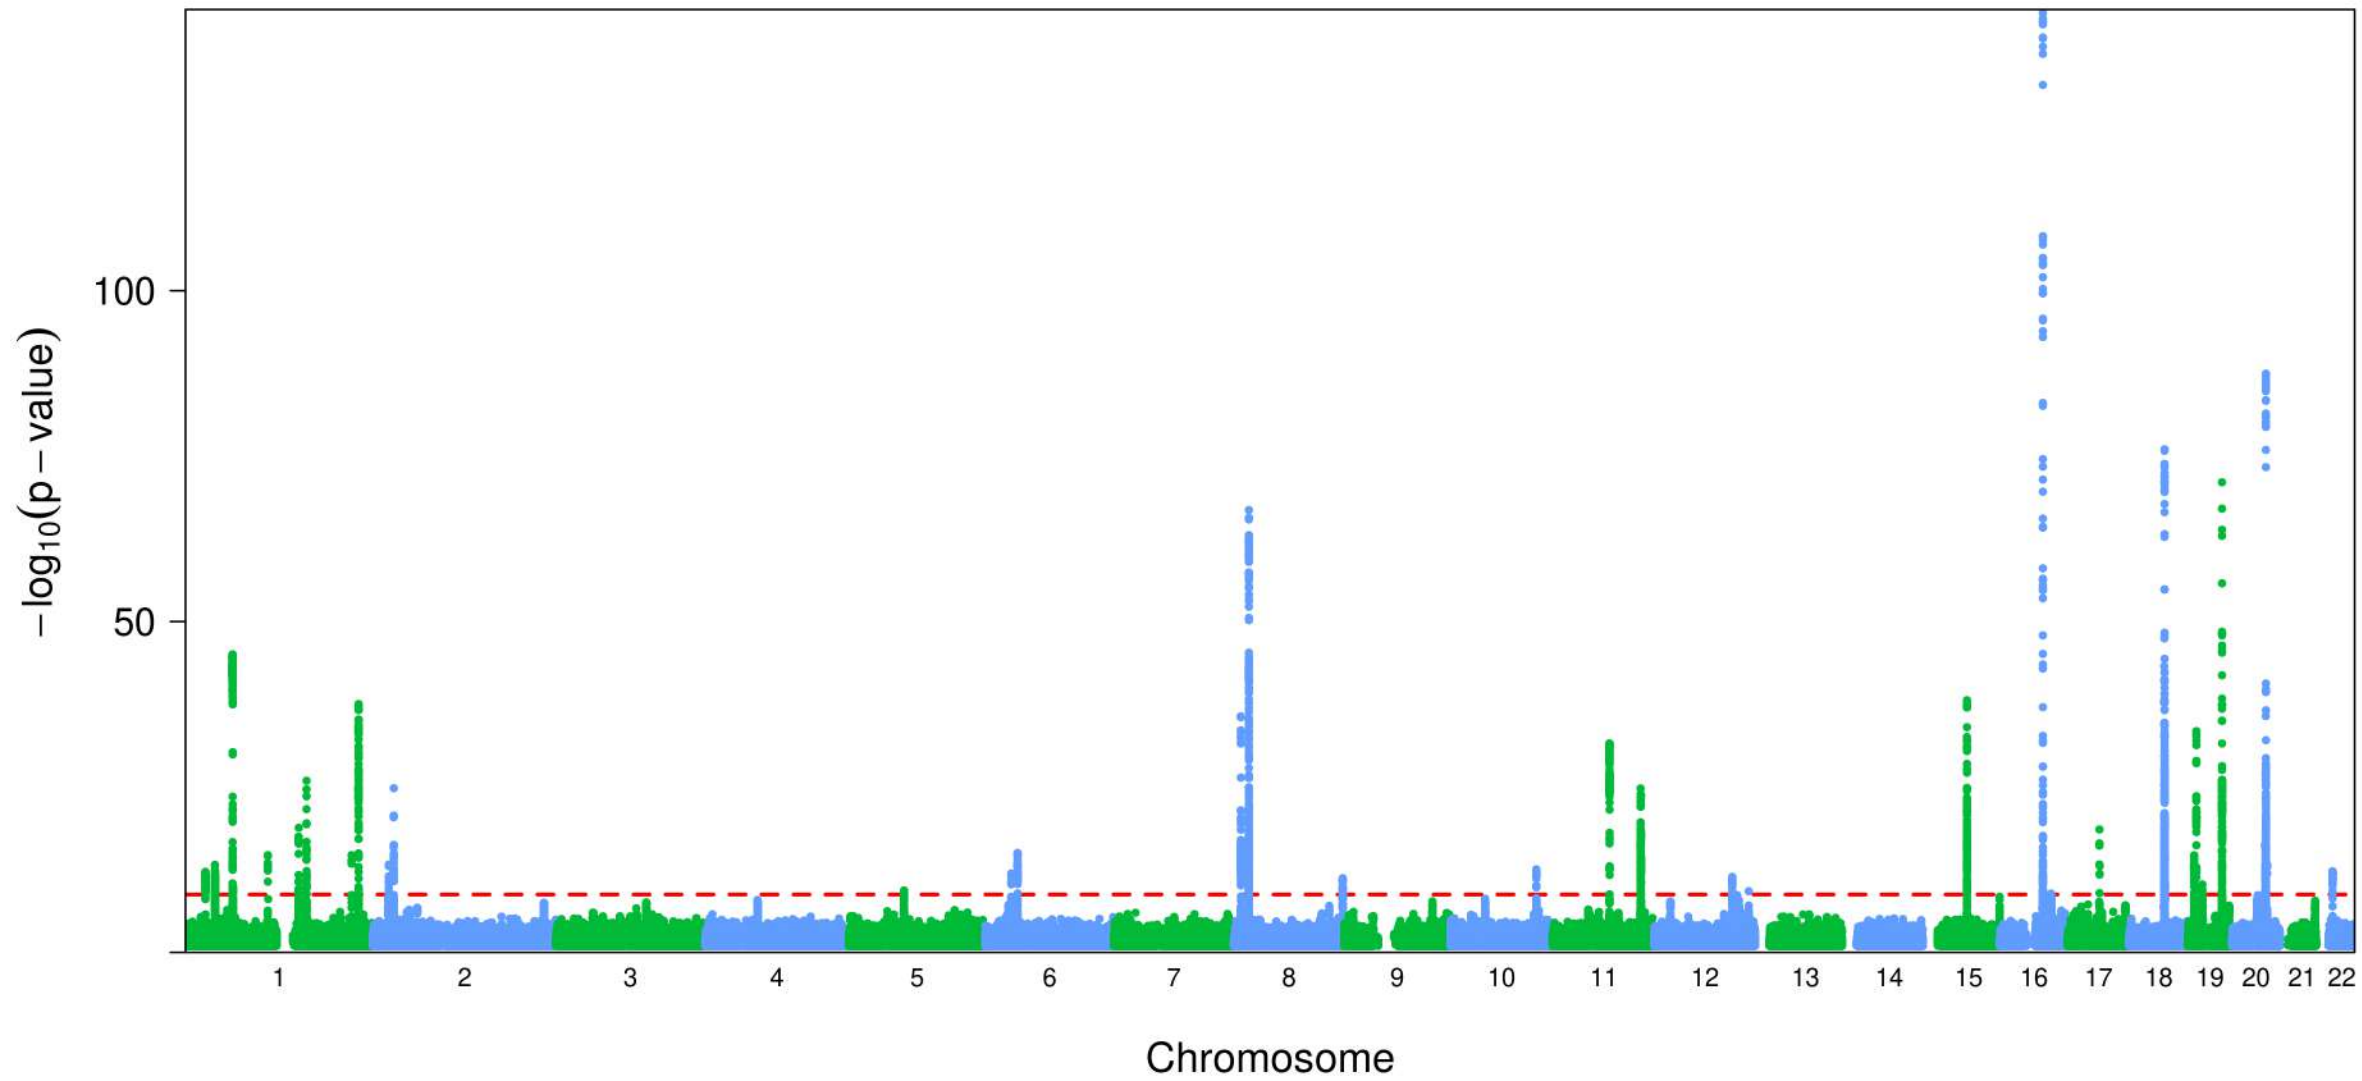

# M-HDL-P

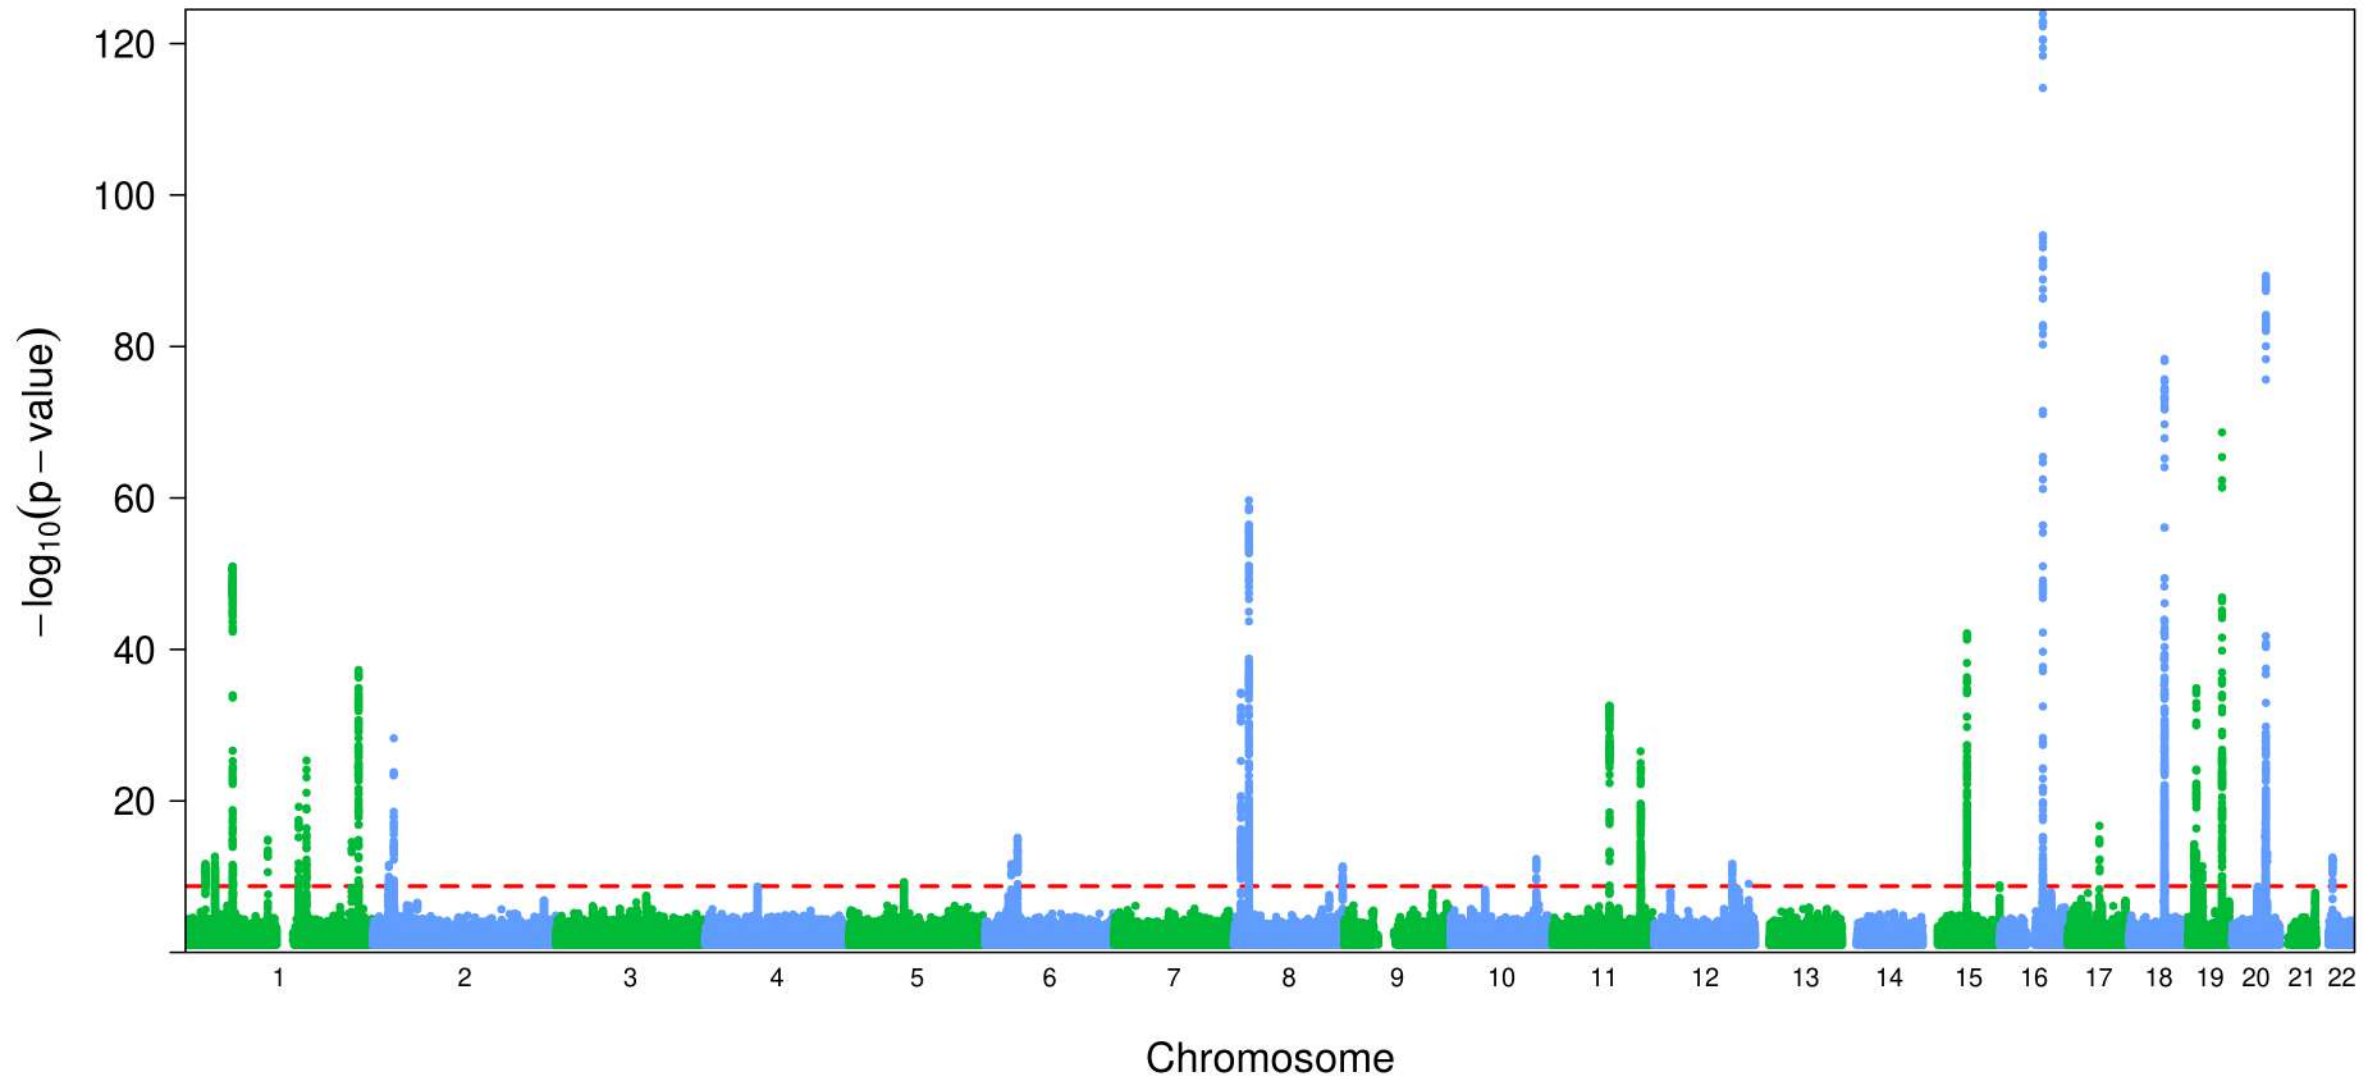

# M-HDL-PL

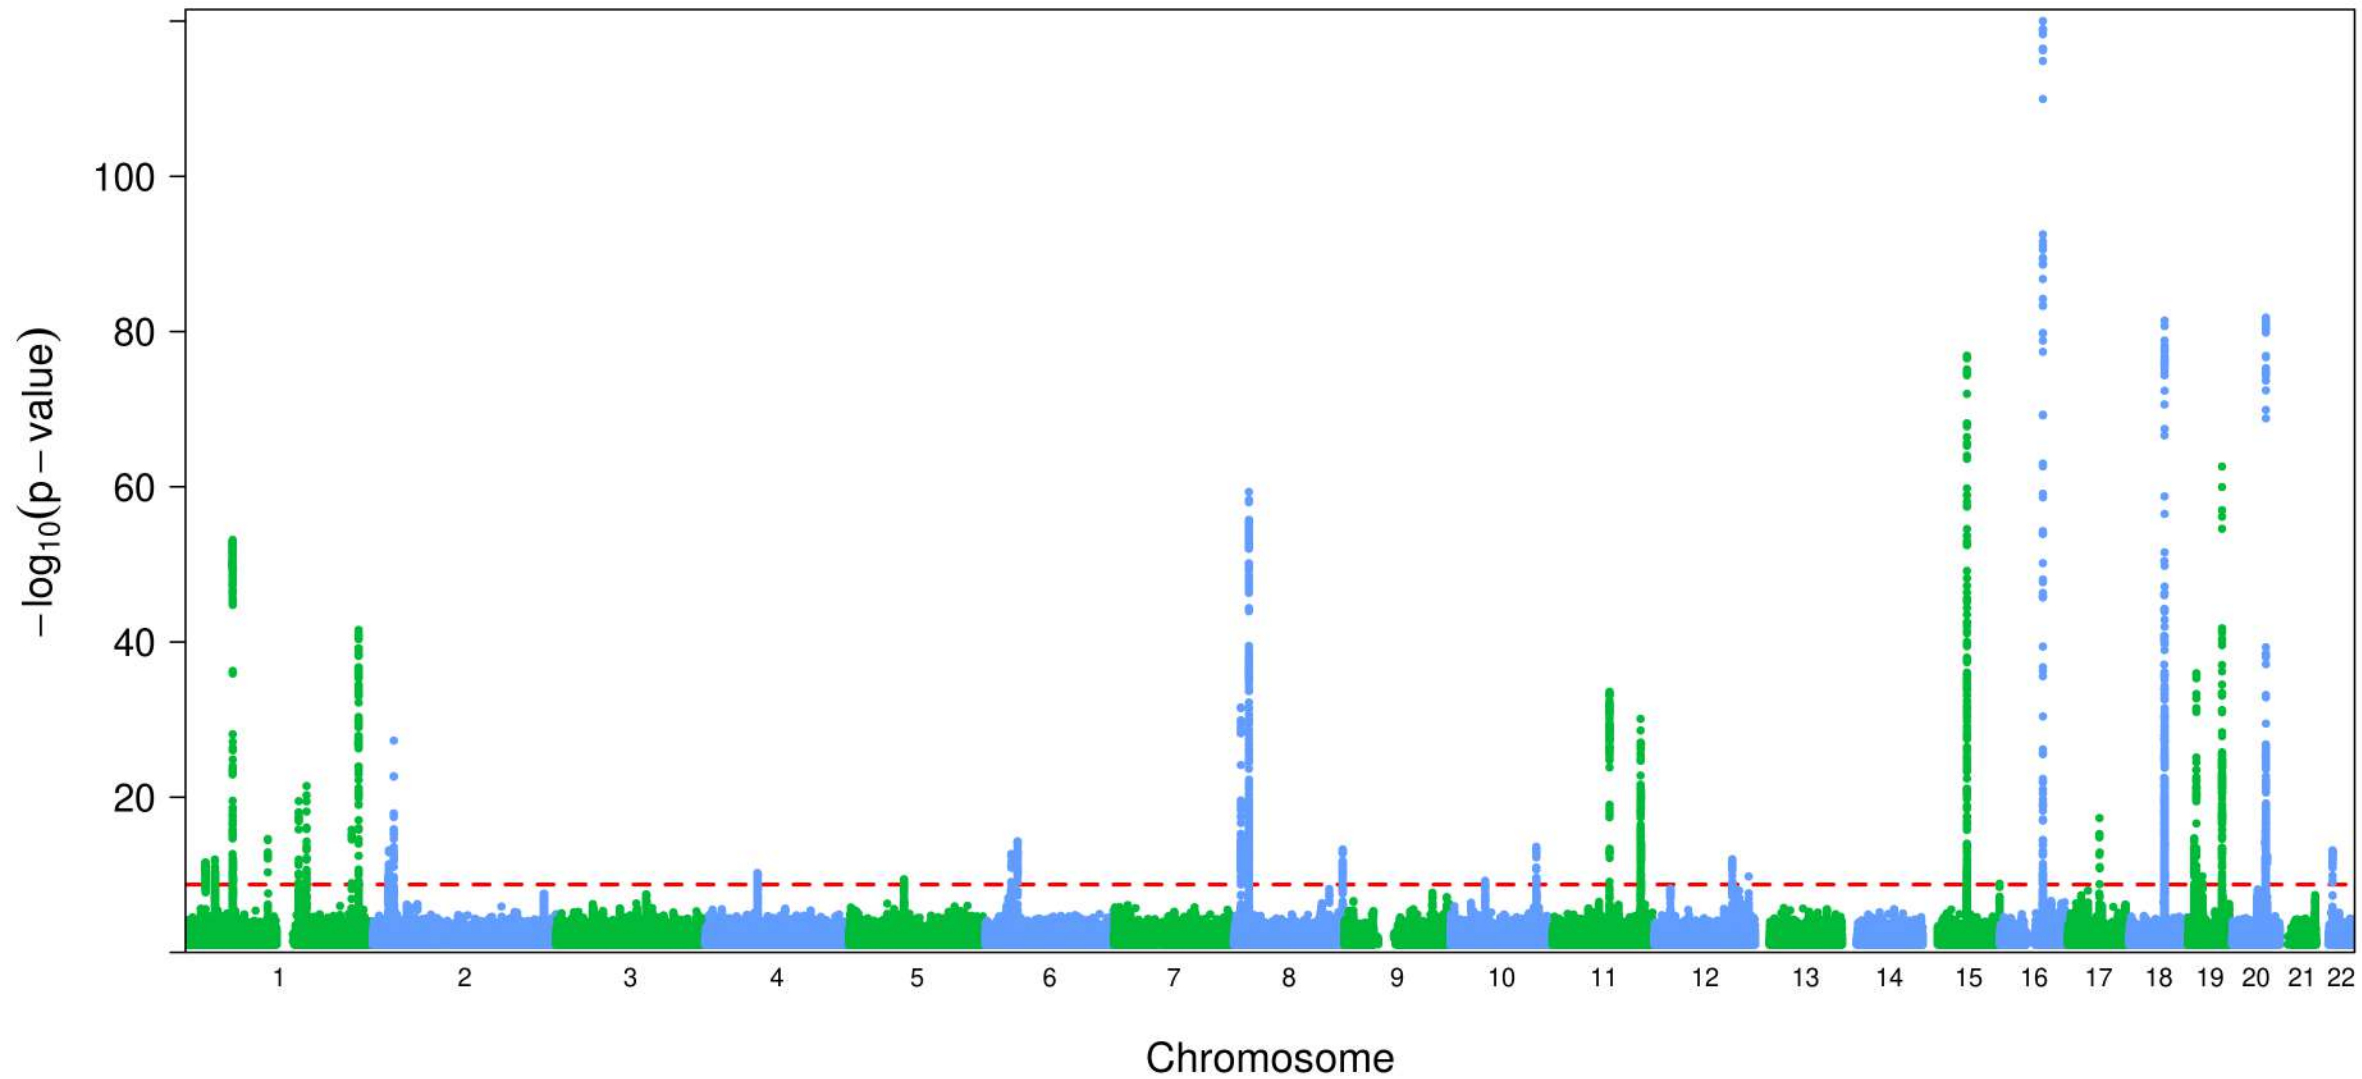

# M-HDL-PL\_percent

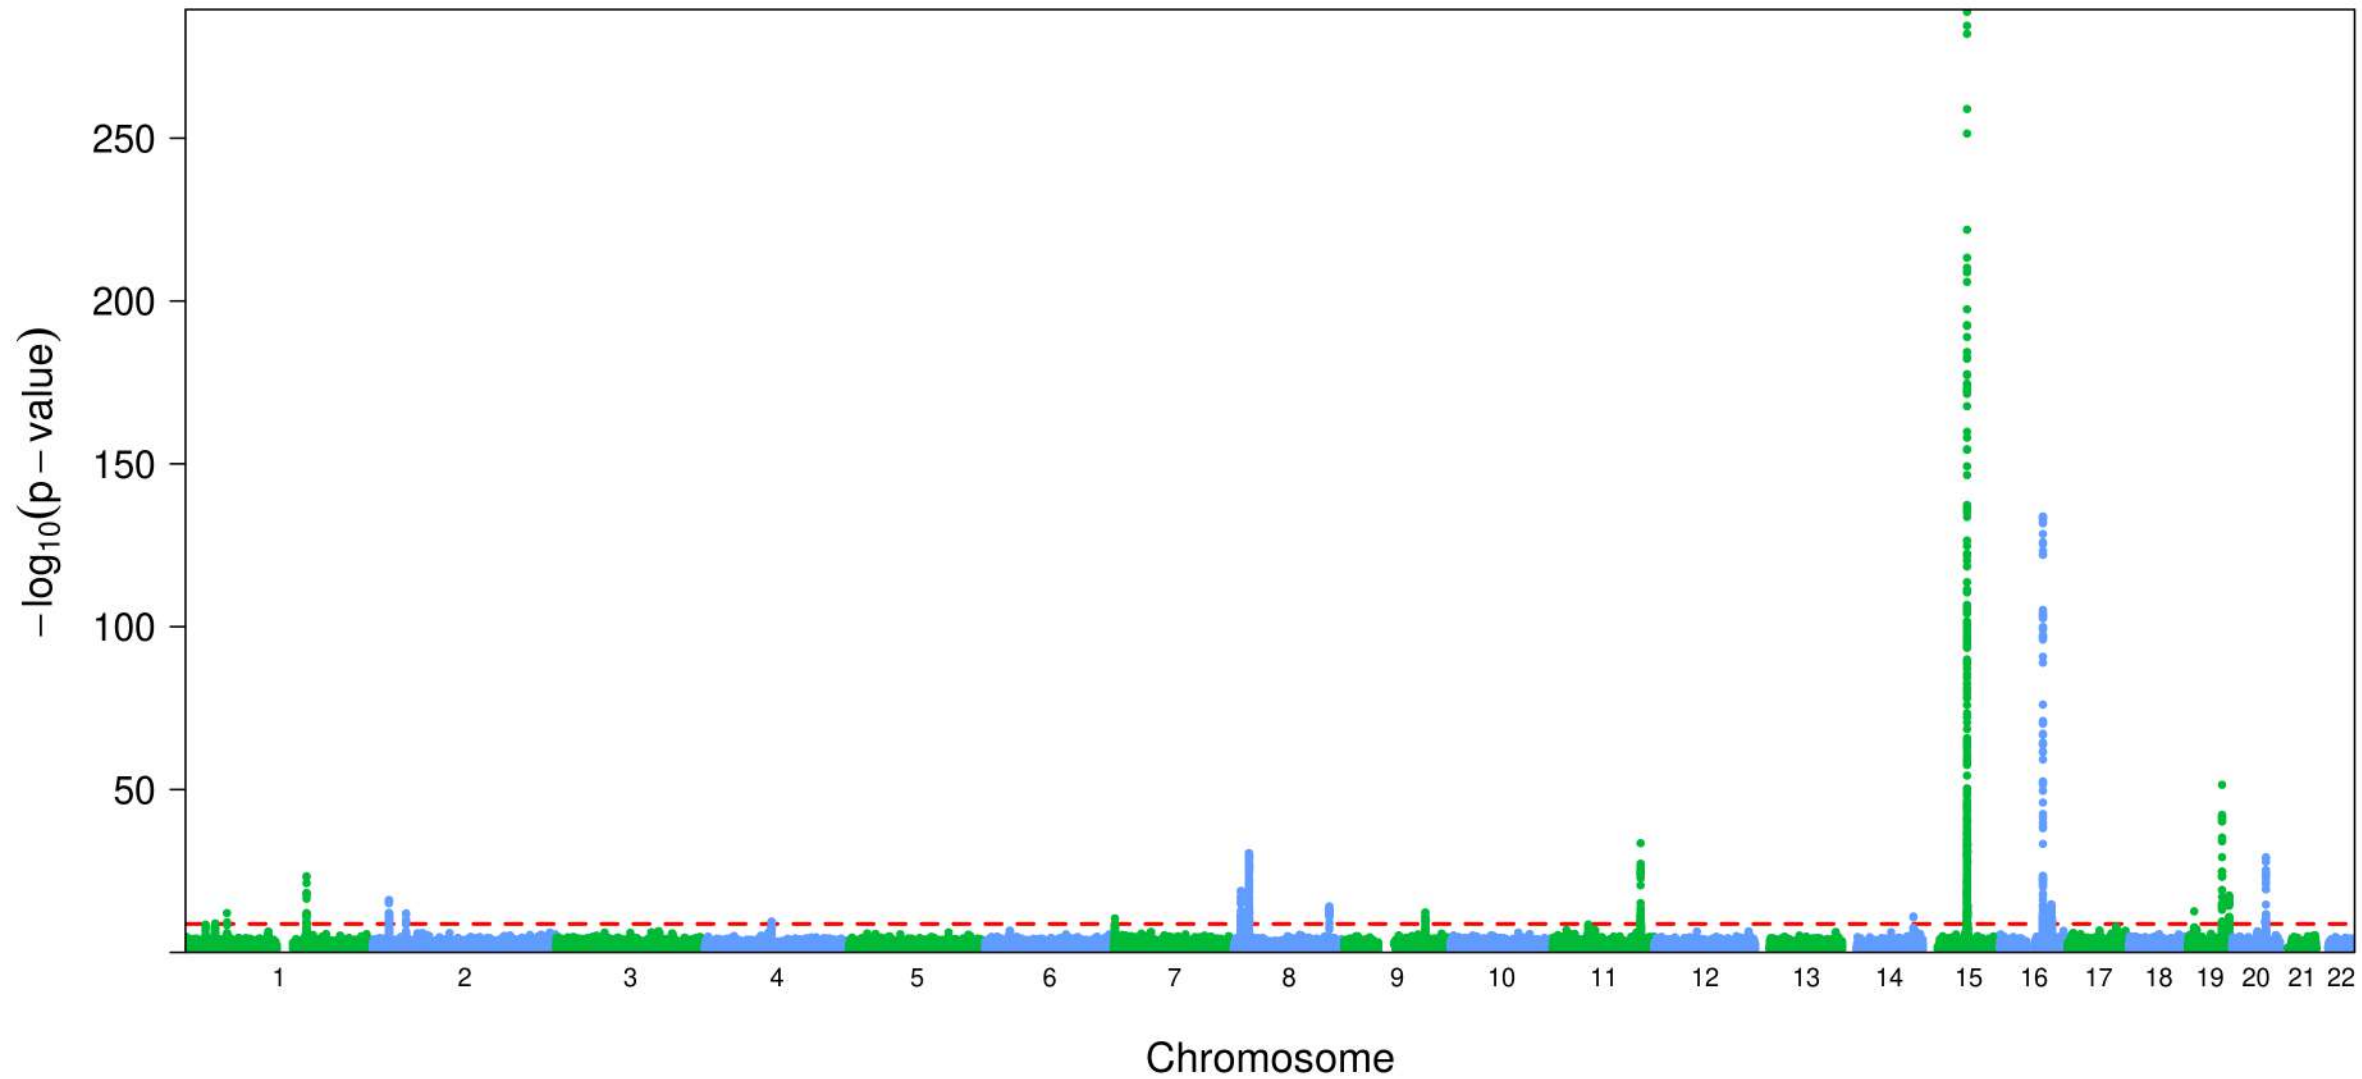

# M-HDL-TG

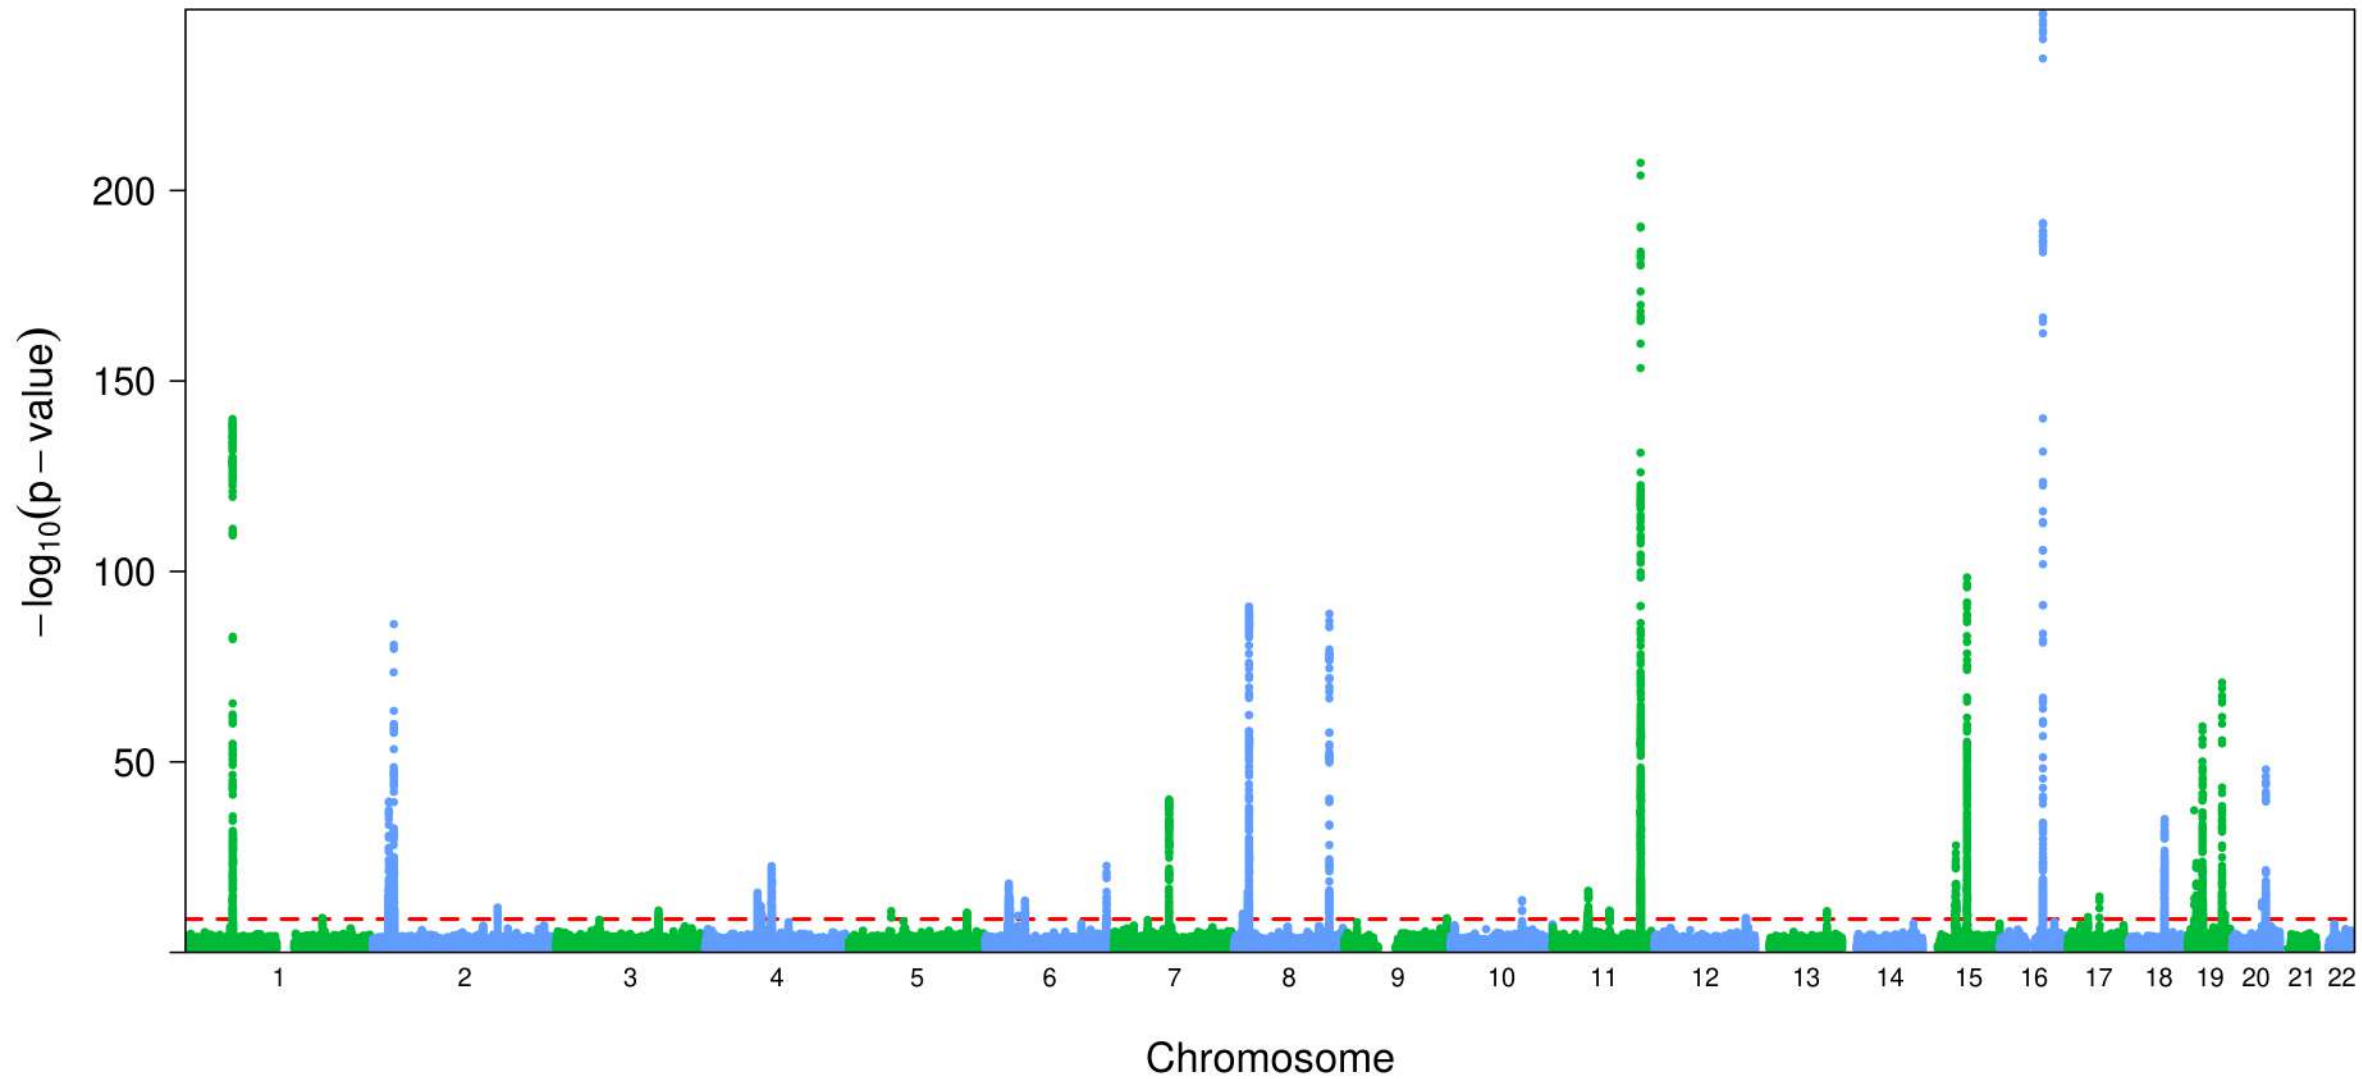

# M-HDL-TG\_percent

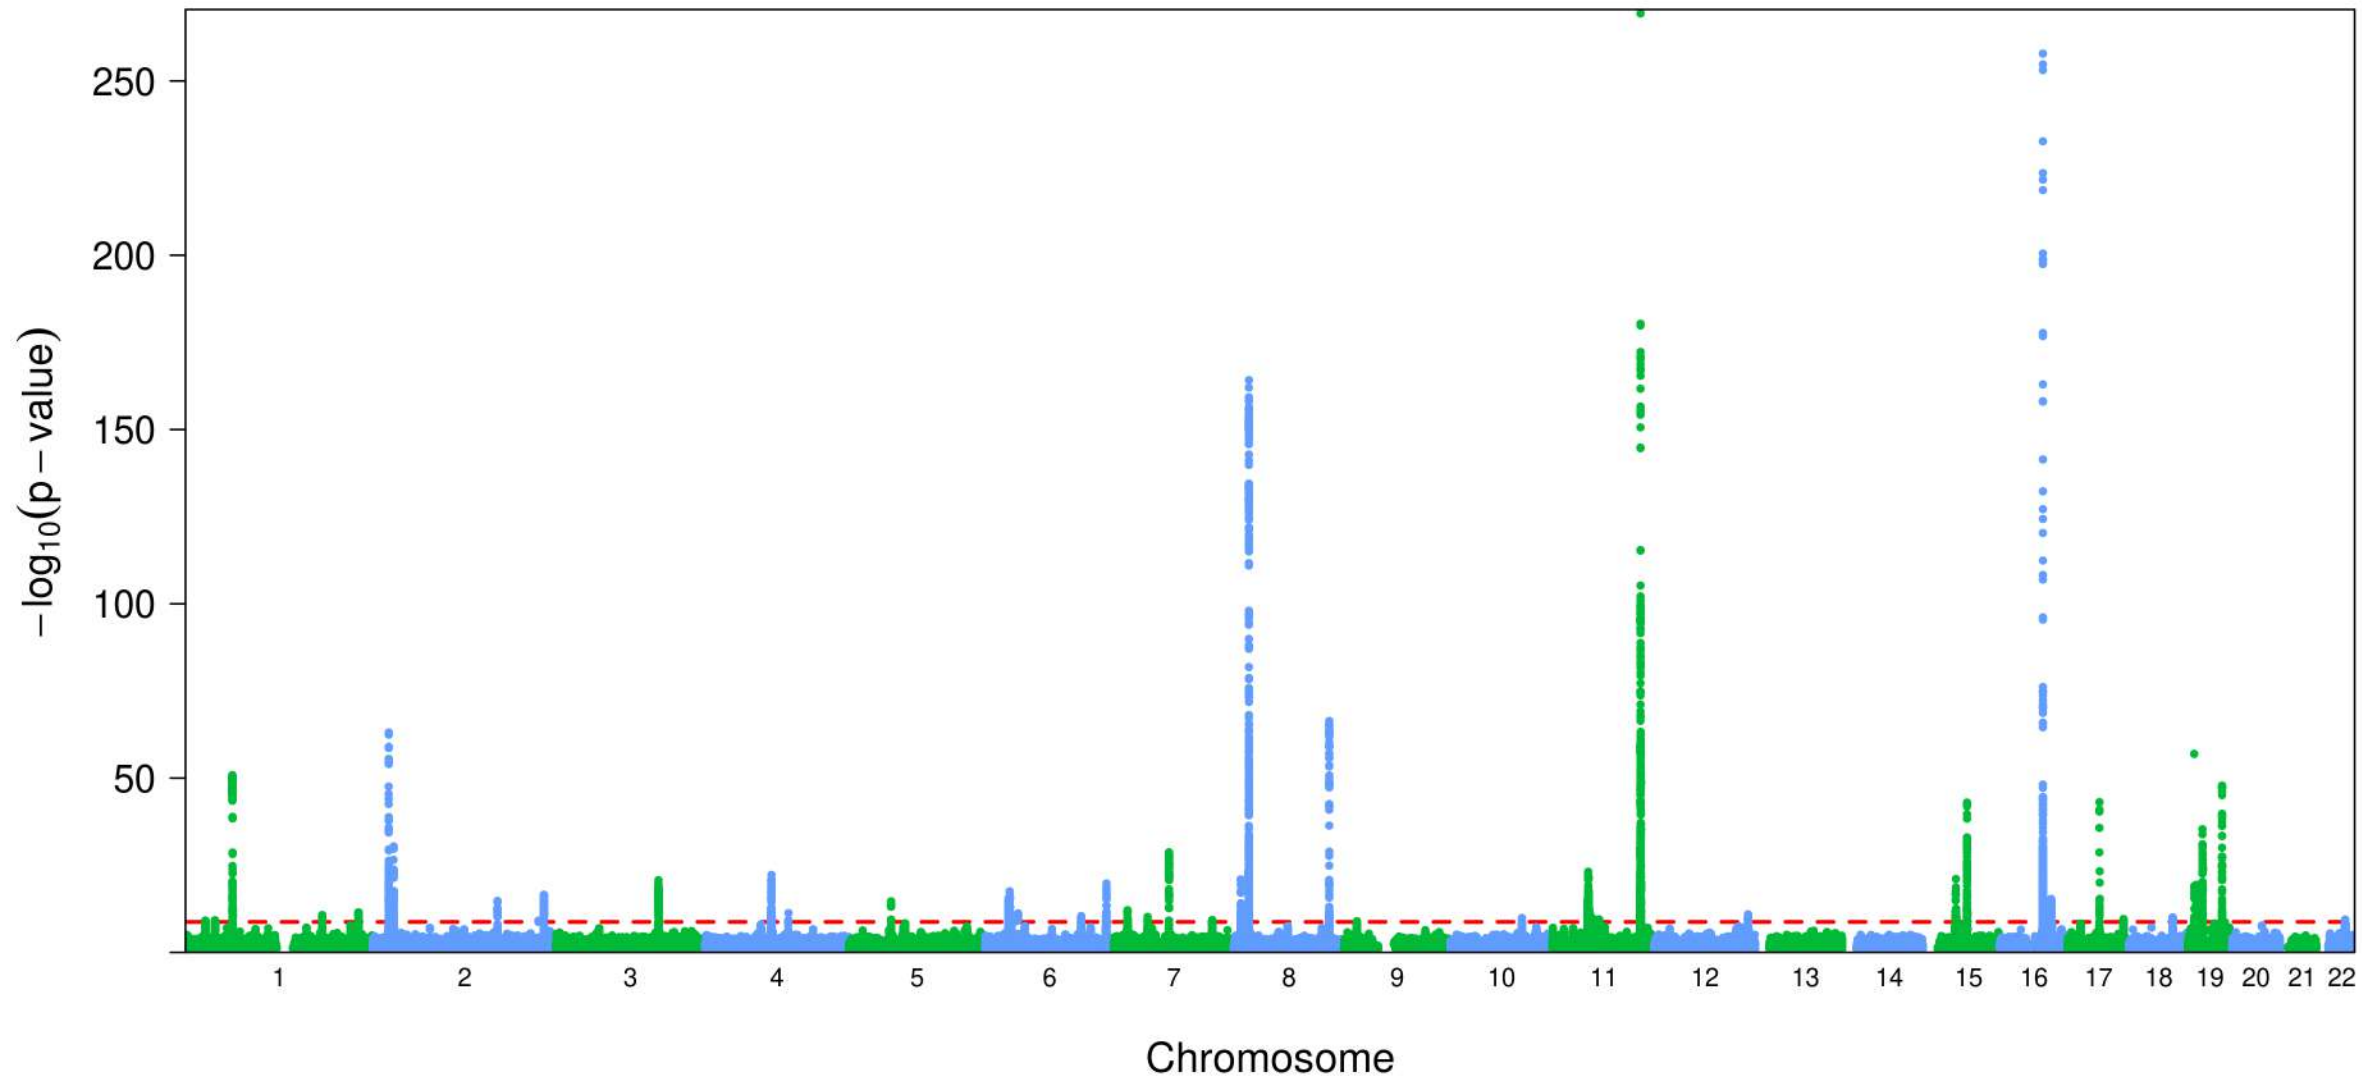

# M-LDL-C

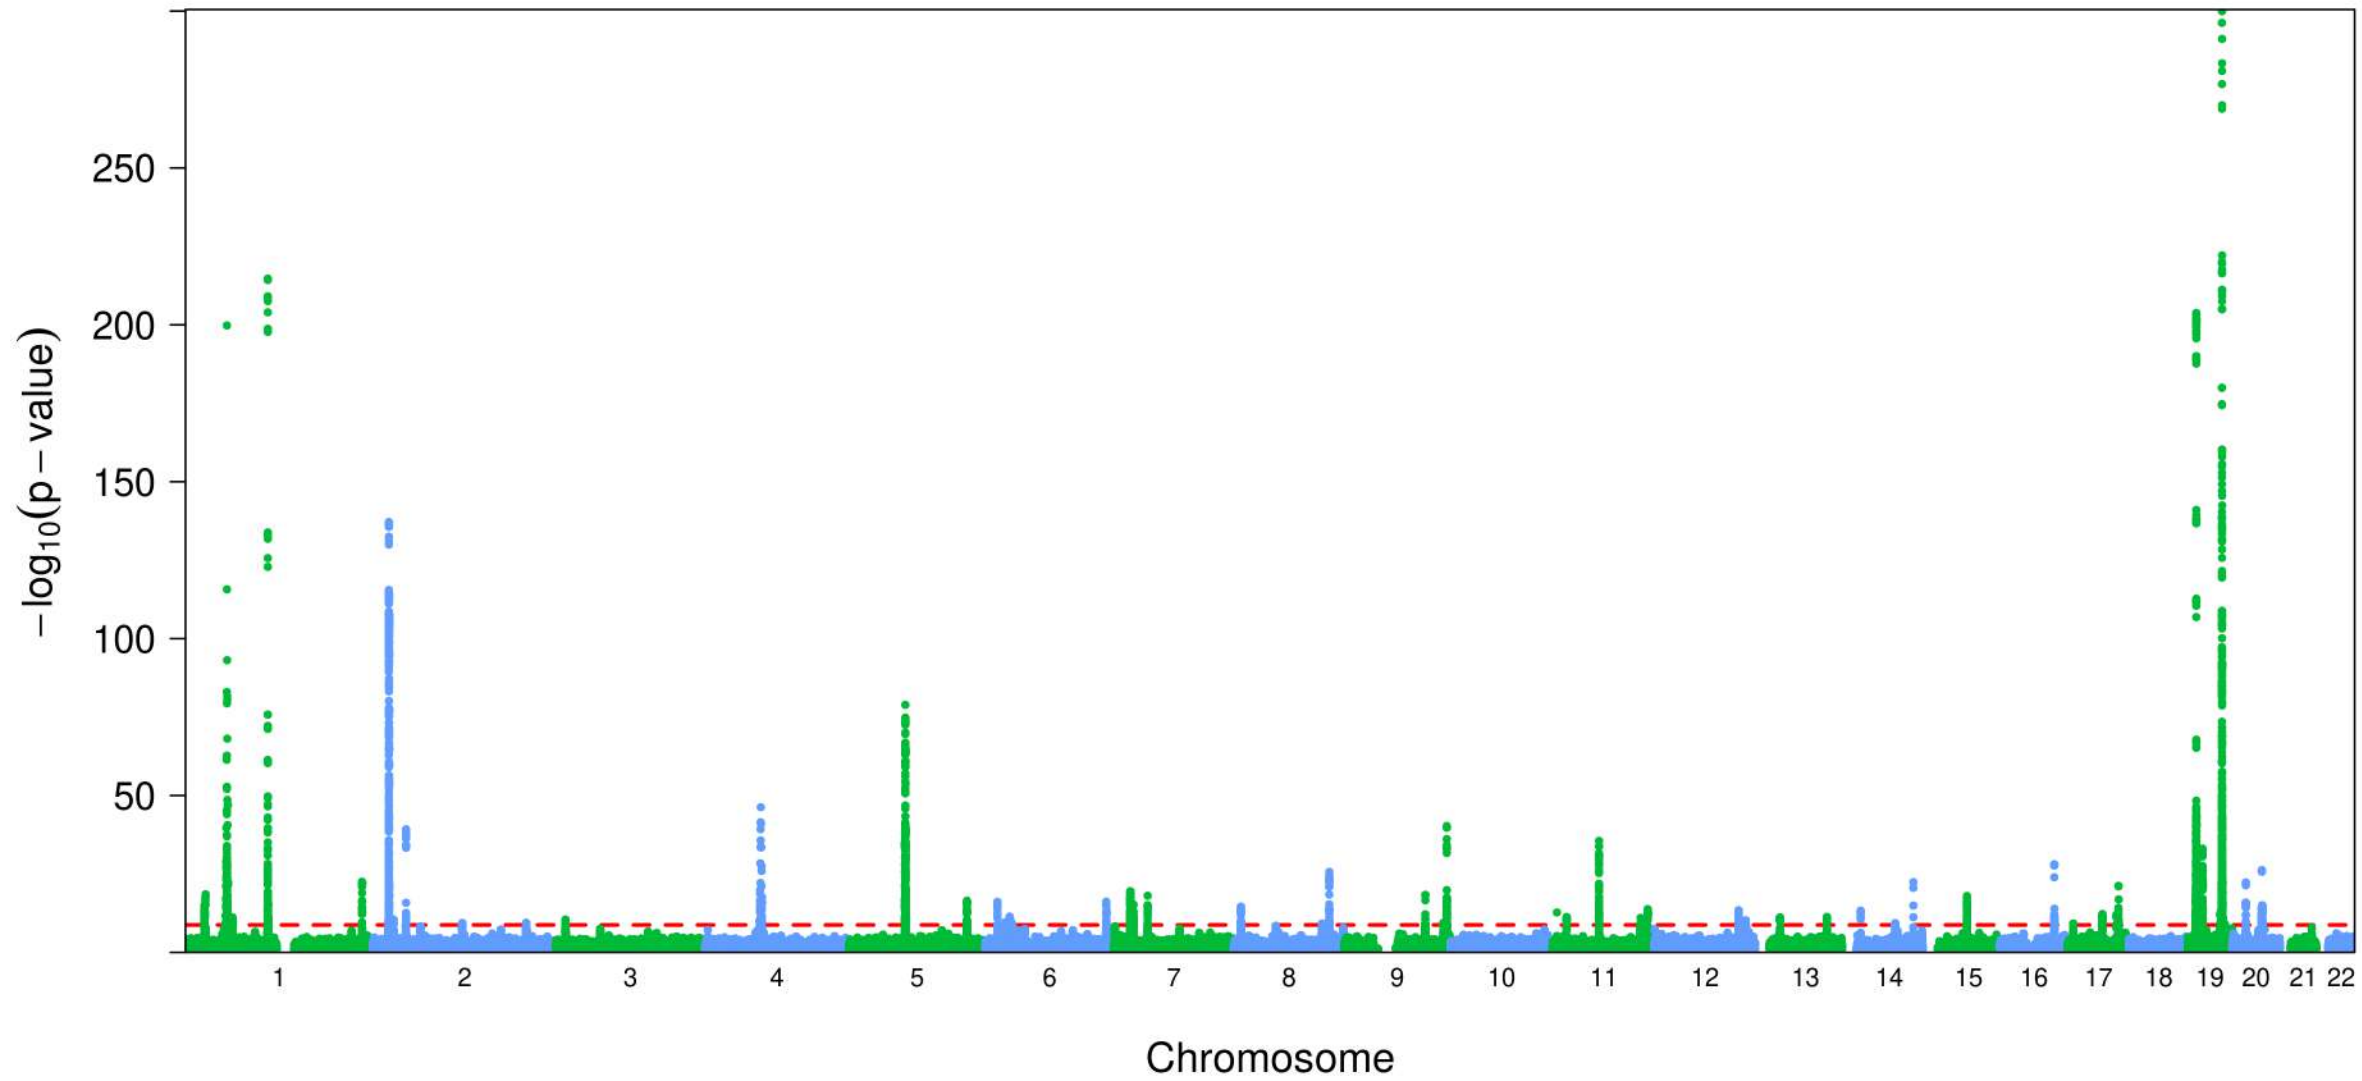

# M-LDL-C\_percent

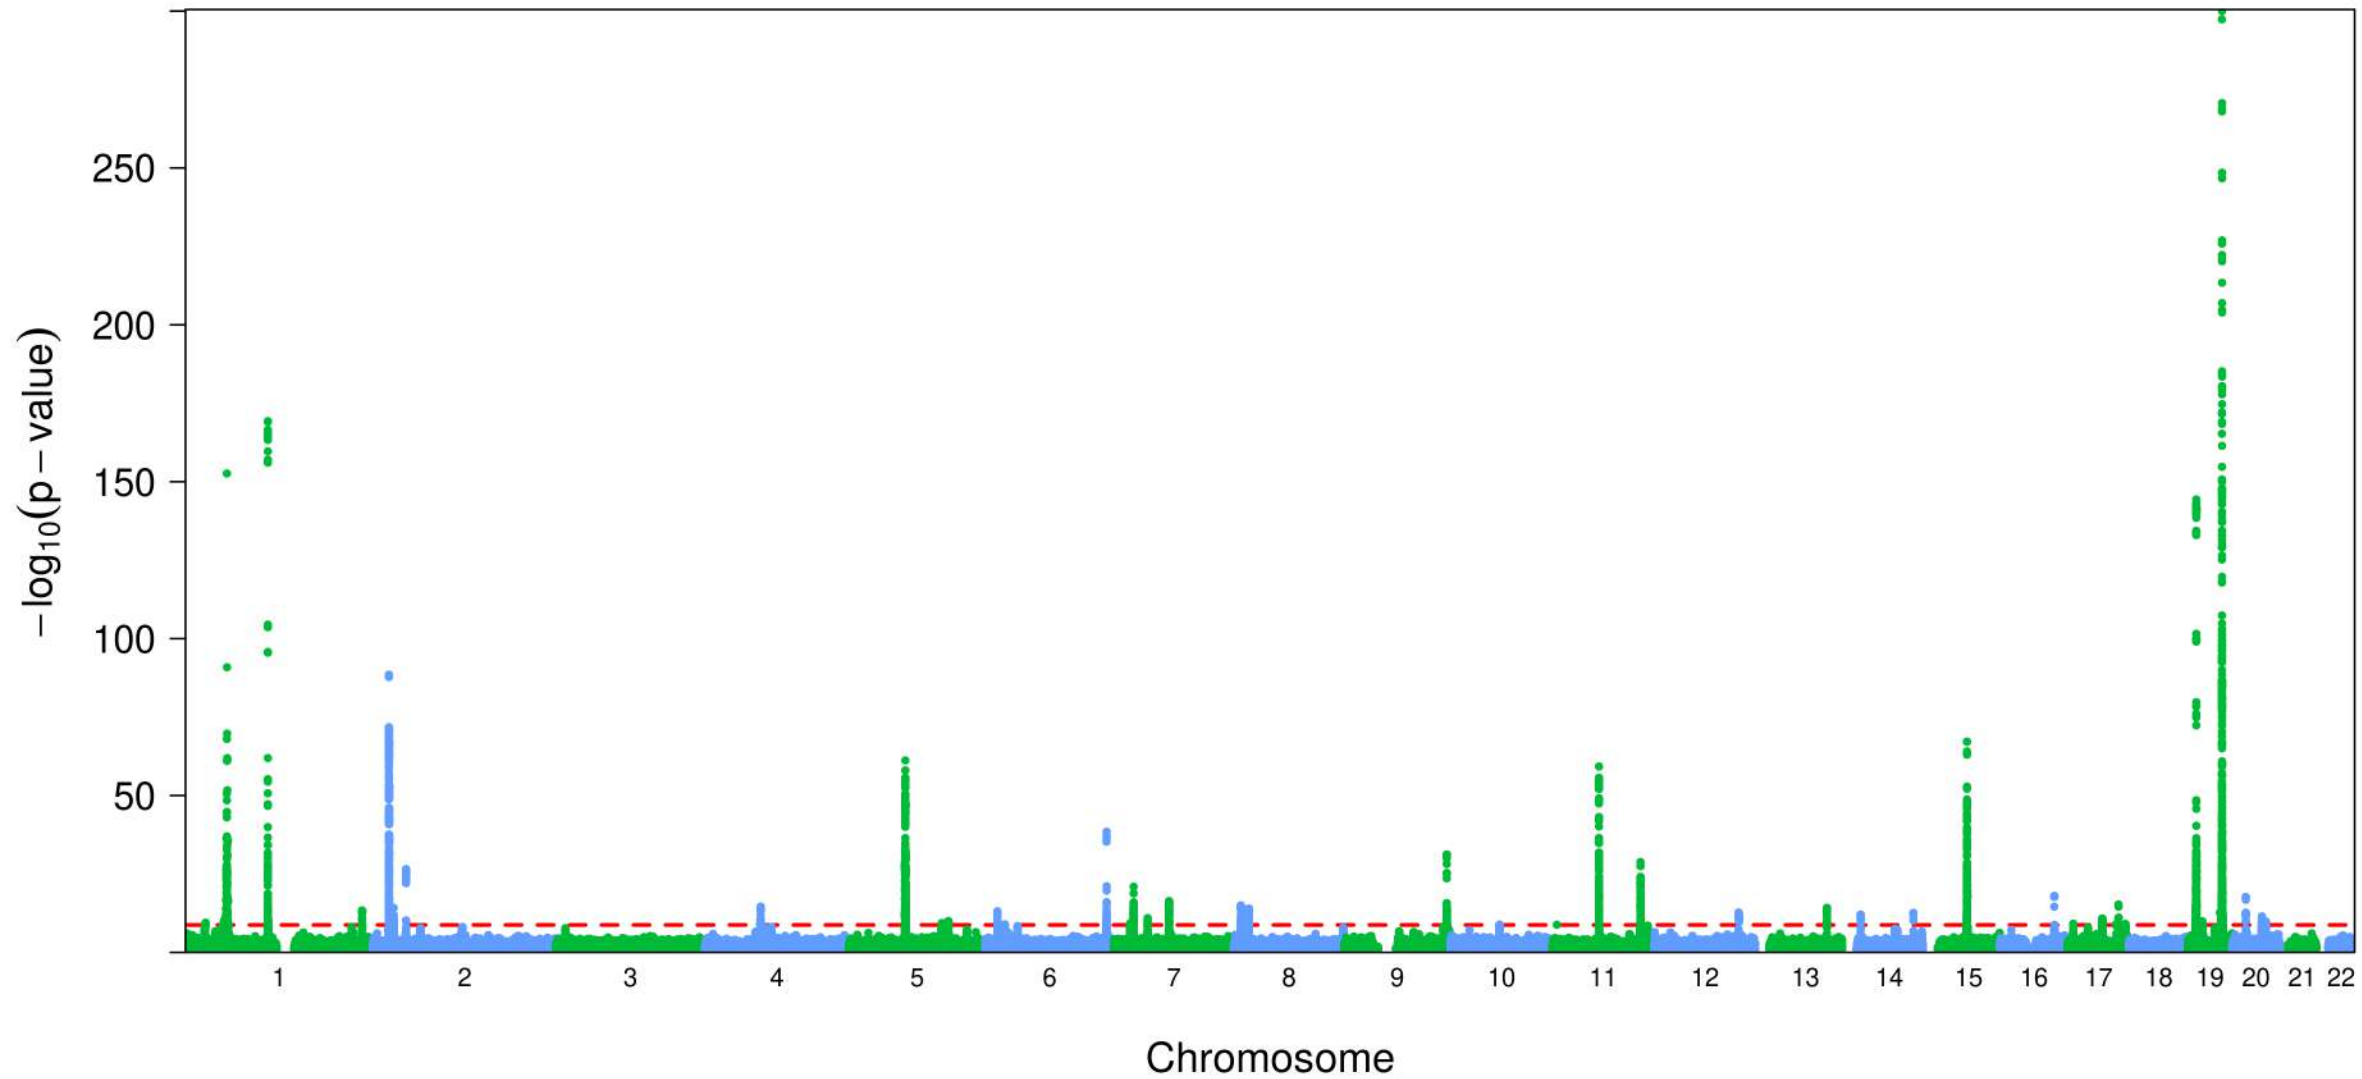



# M-LDL-CE

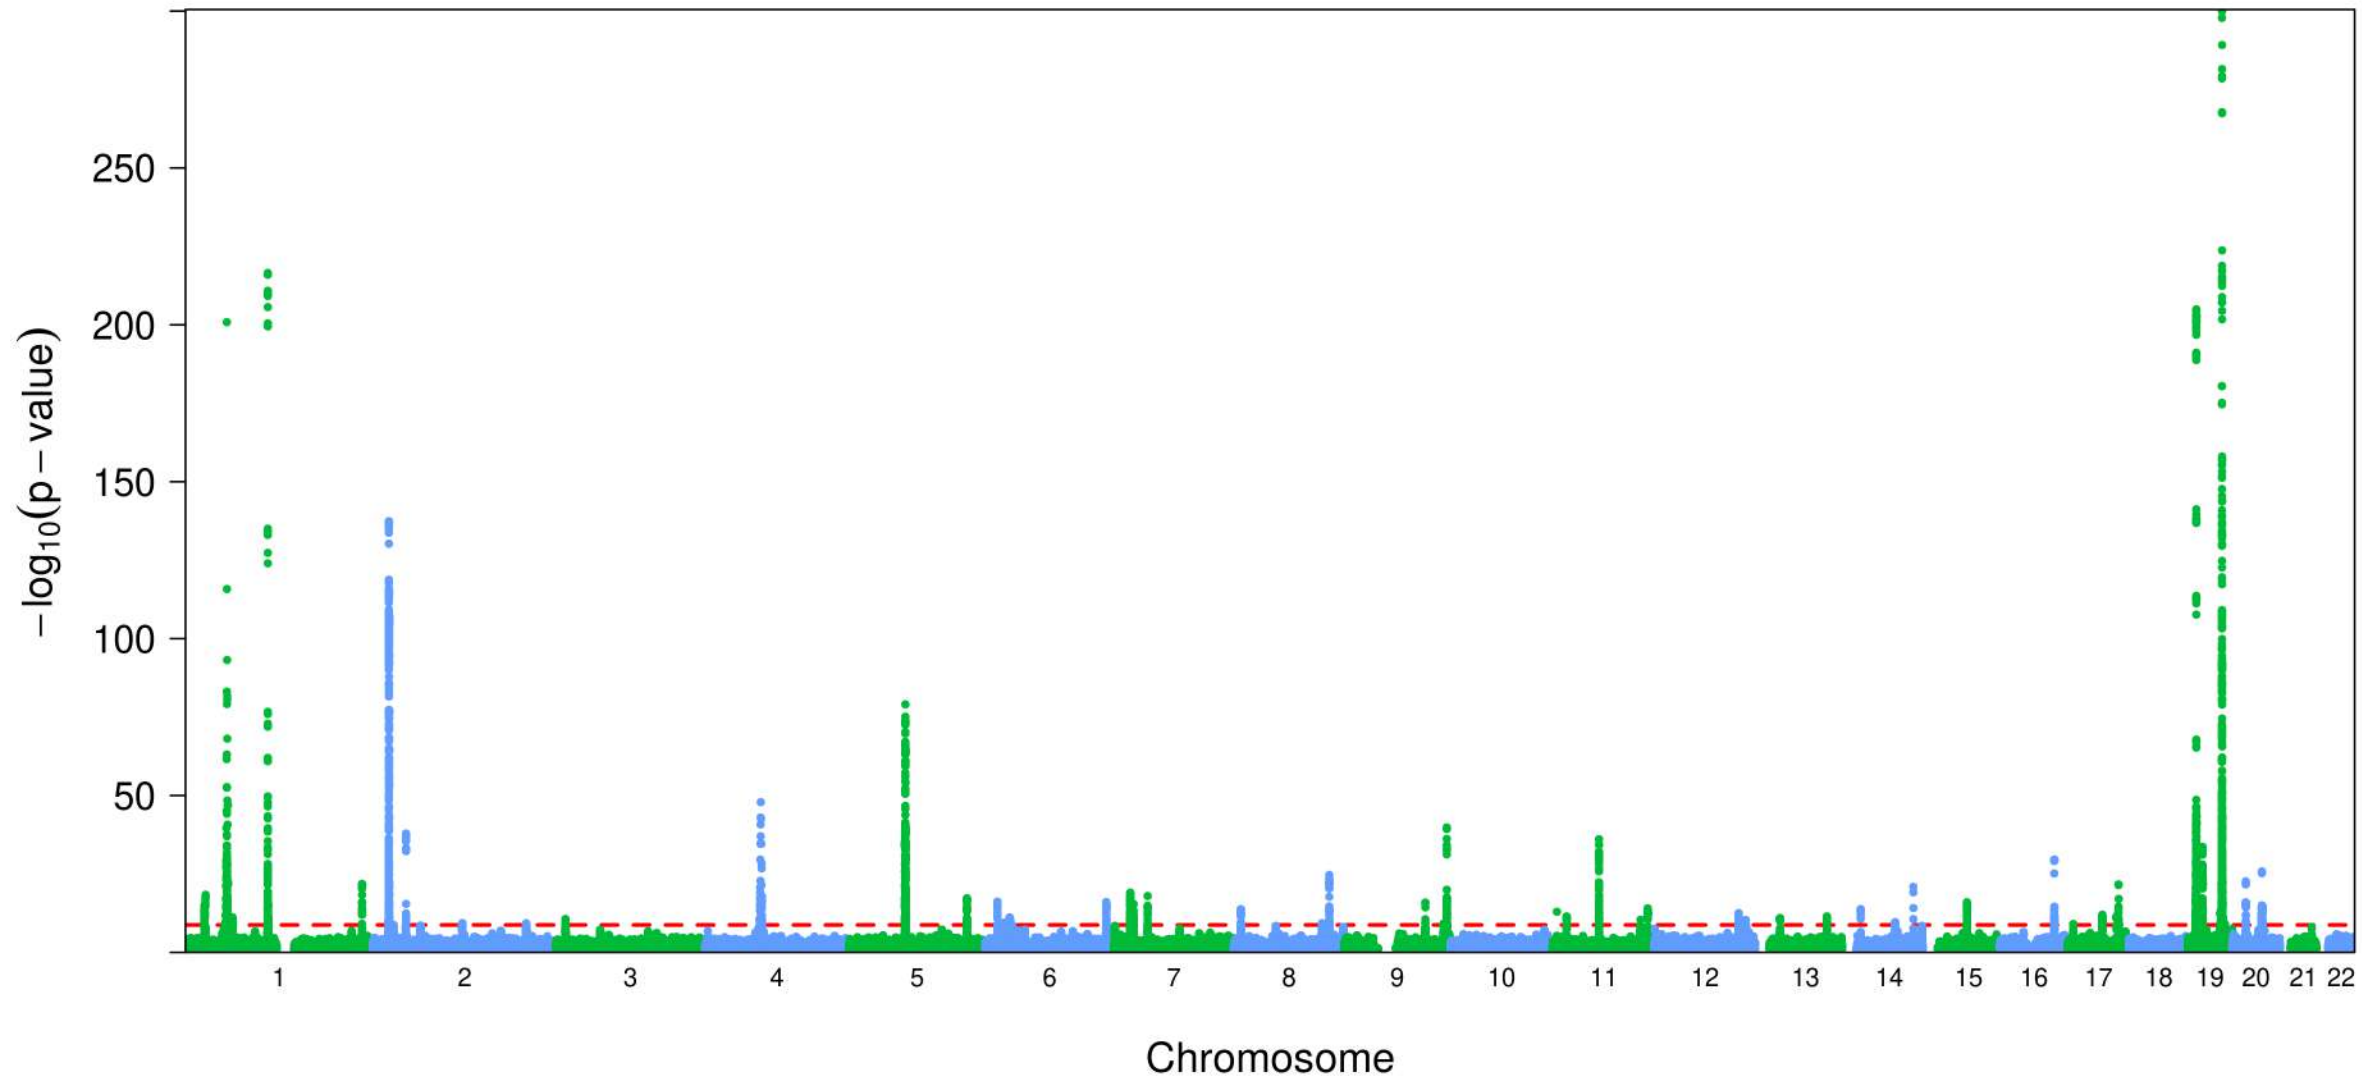

# M-LDL-CE\_percent

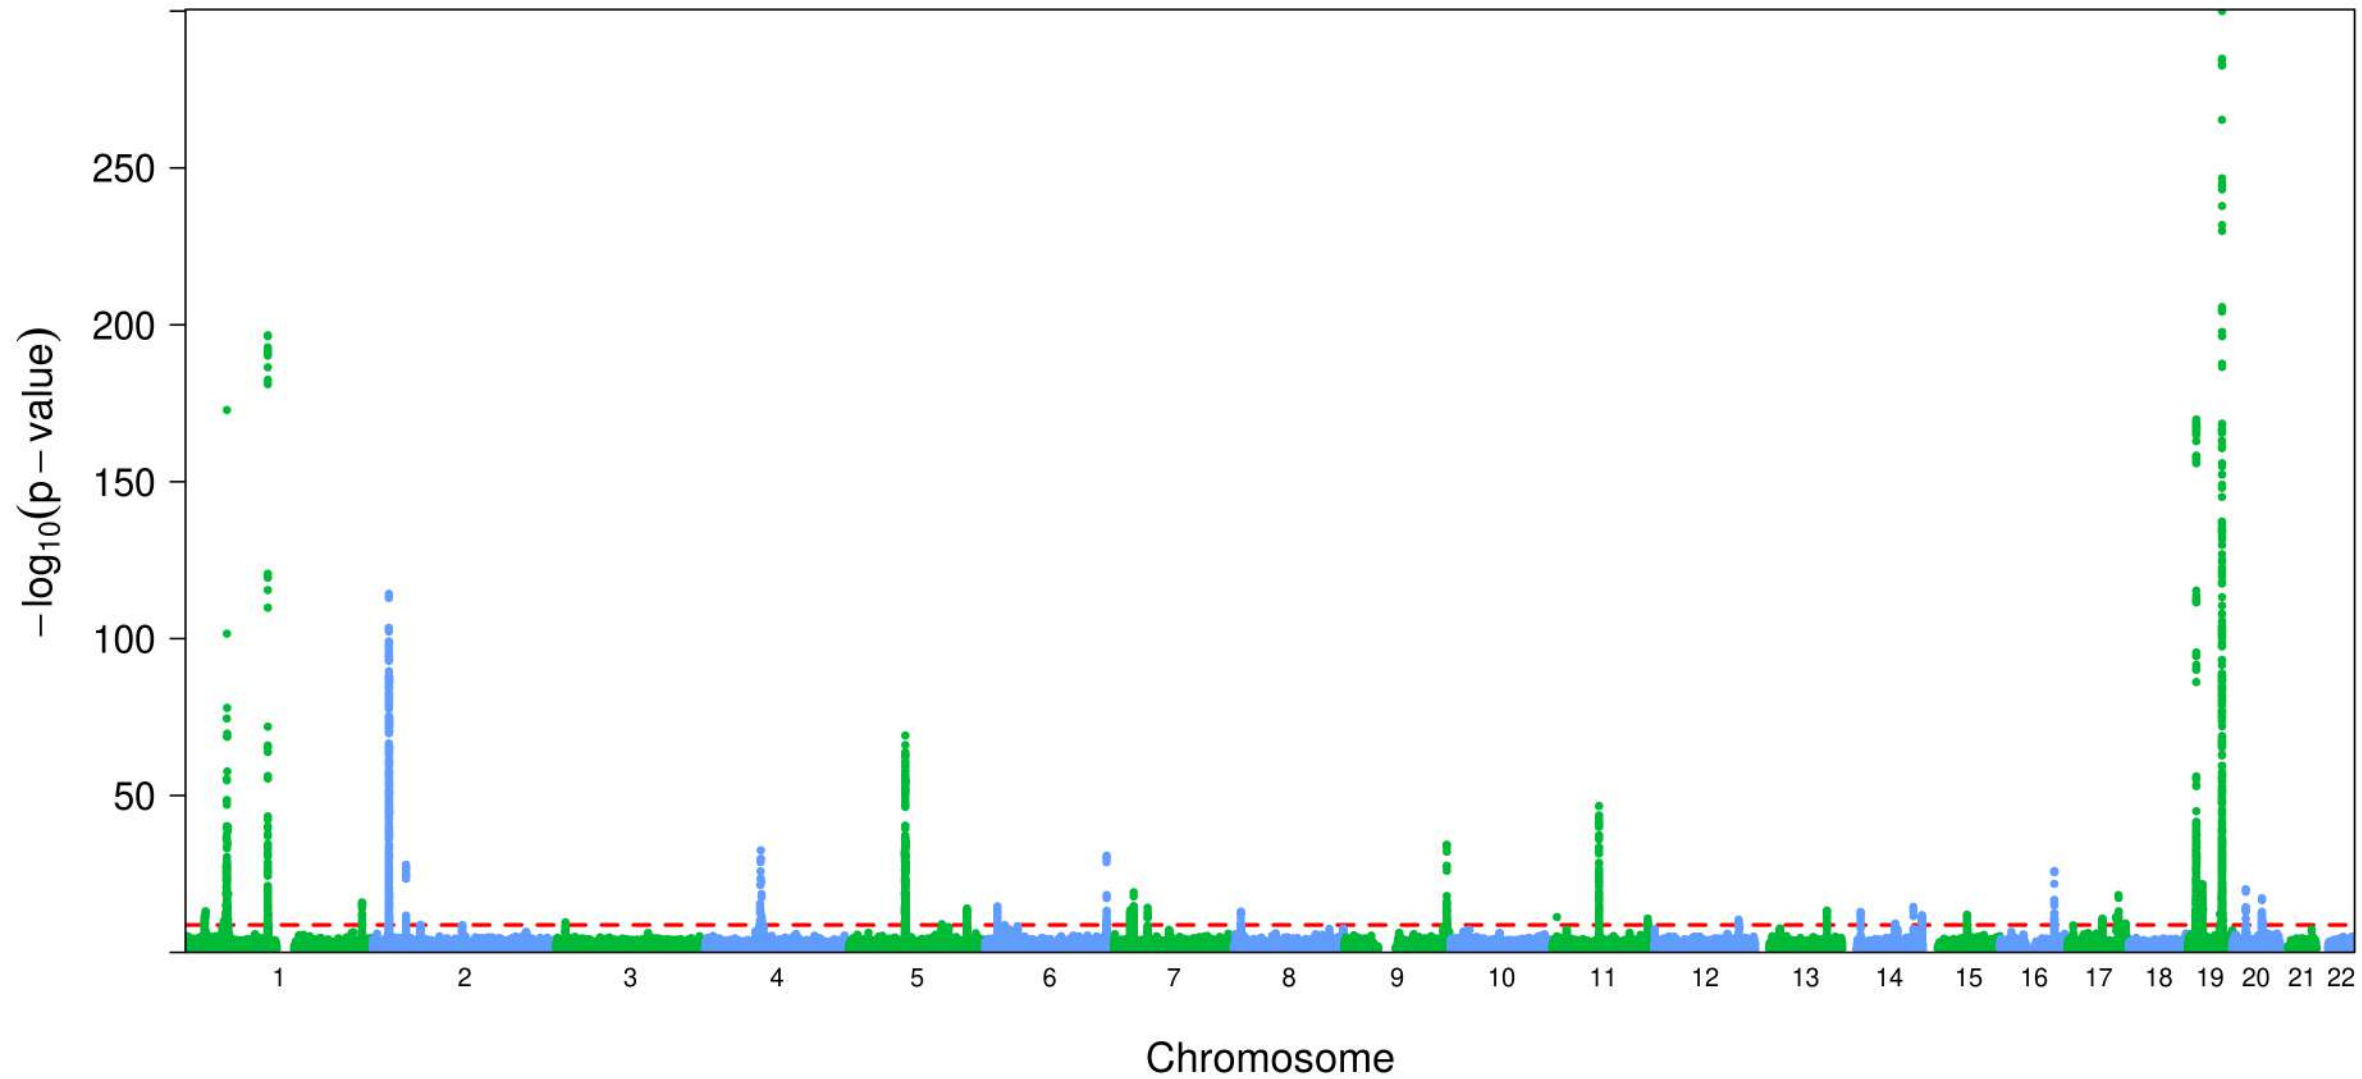

# M-LDL-FC

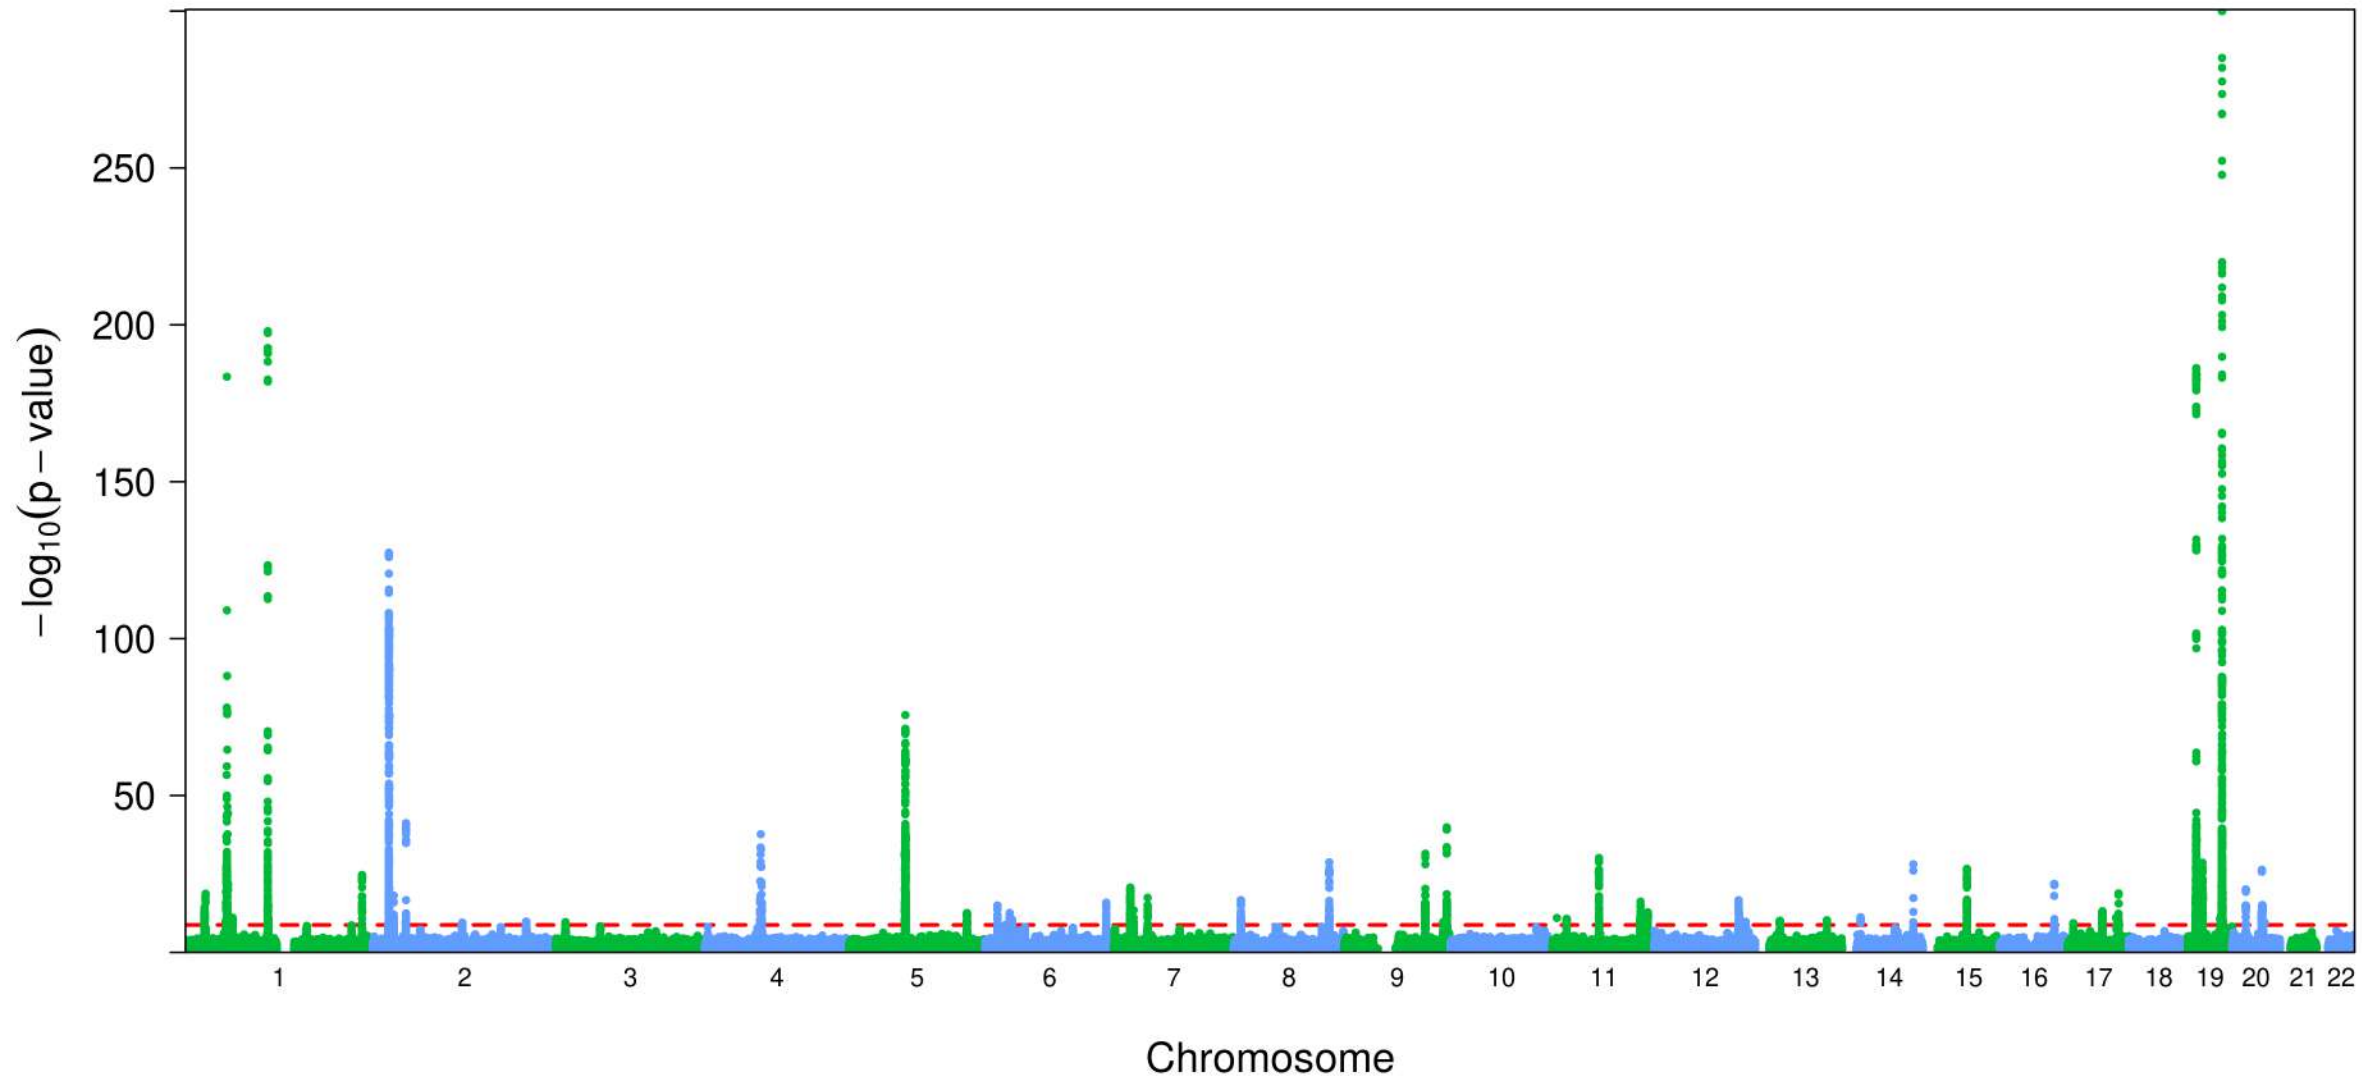

# M-LDL-FC\_percent

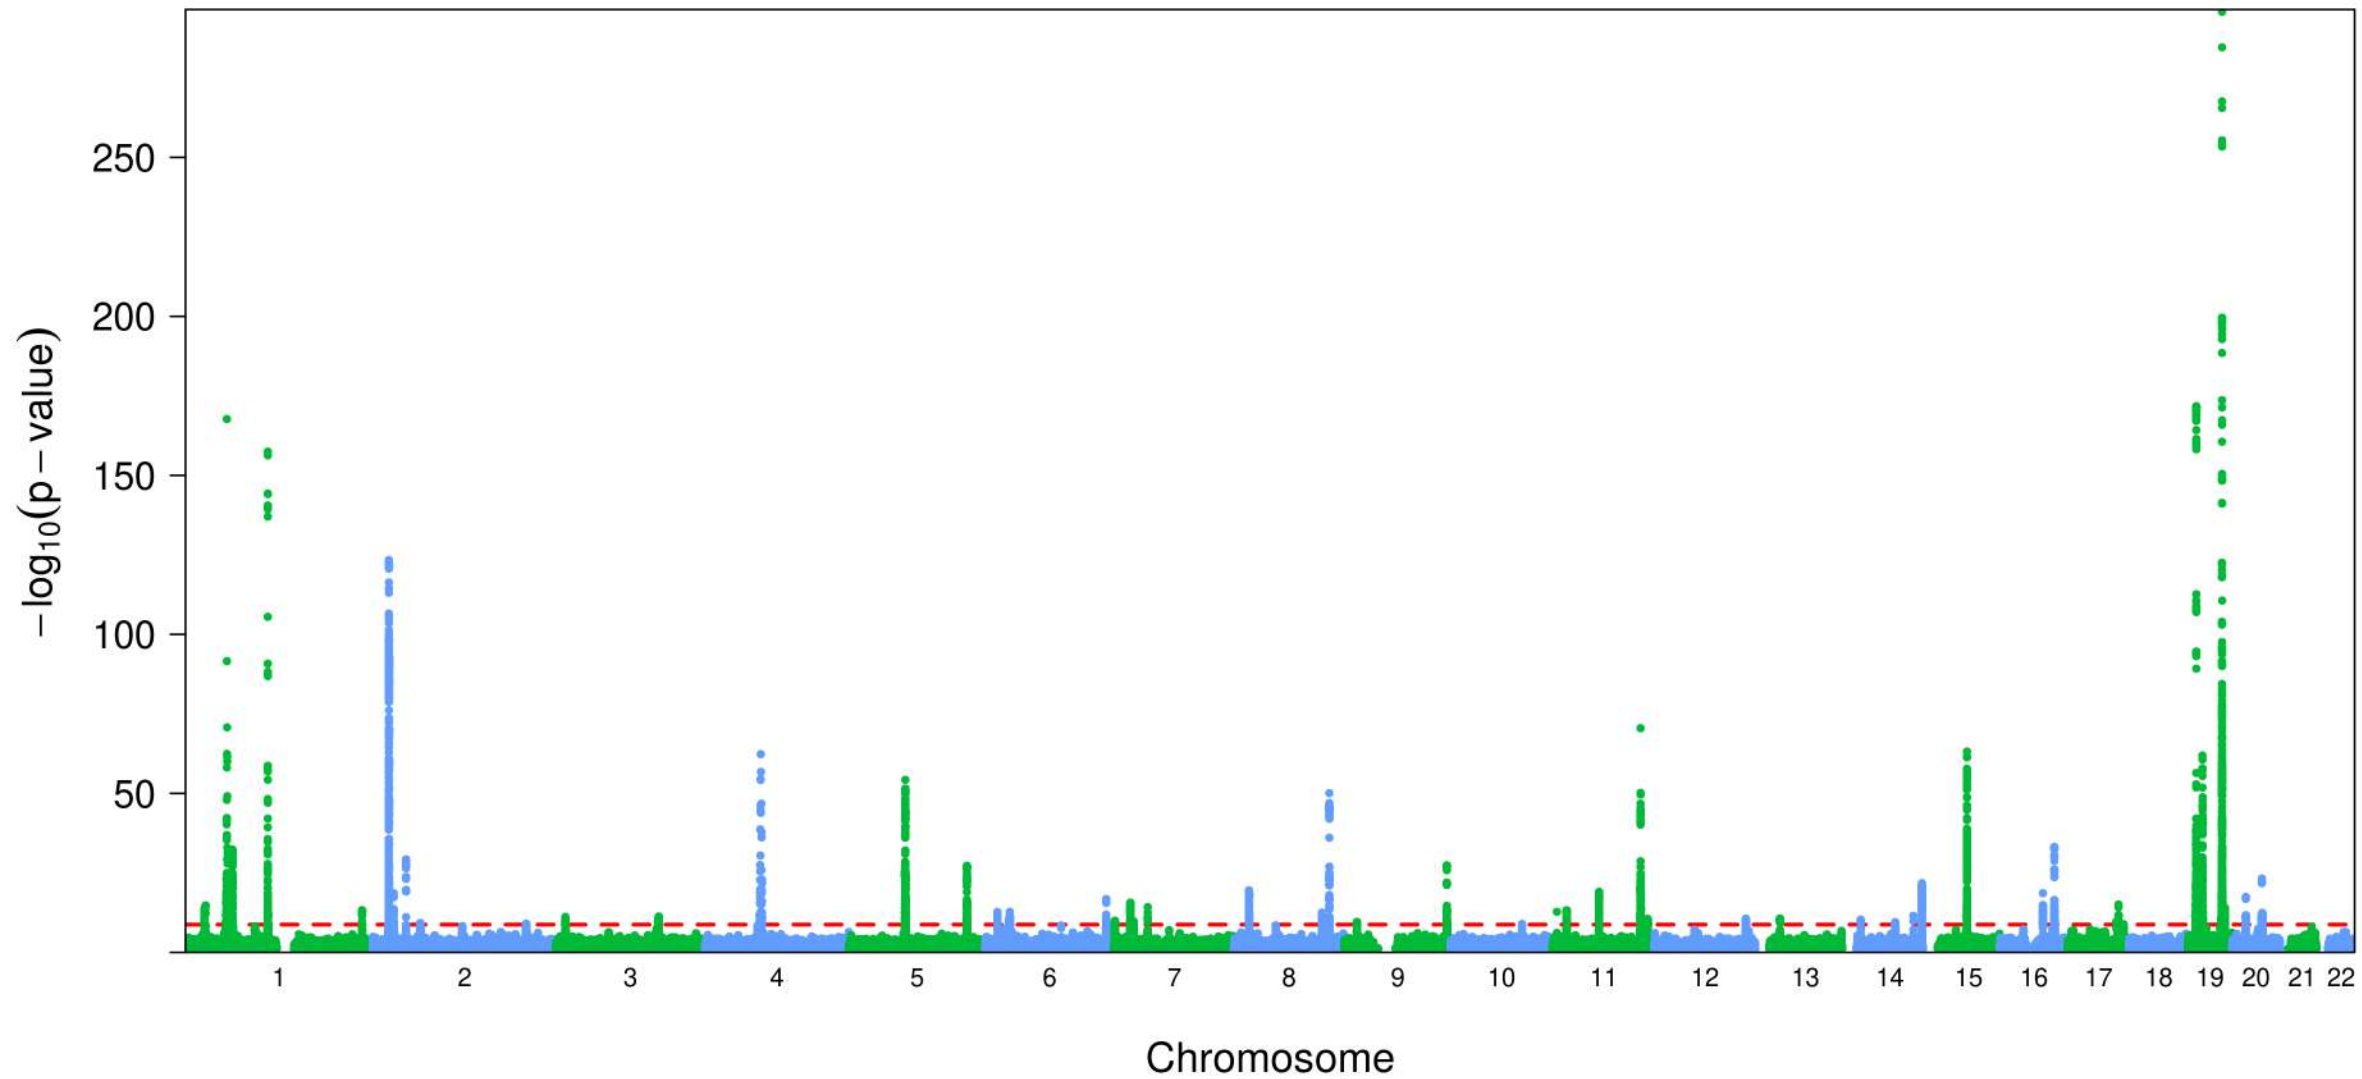

# M-LDL-L

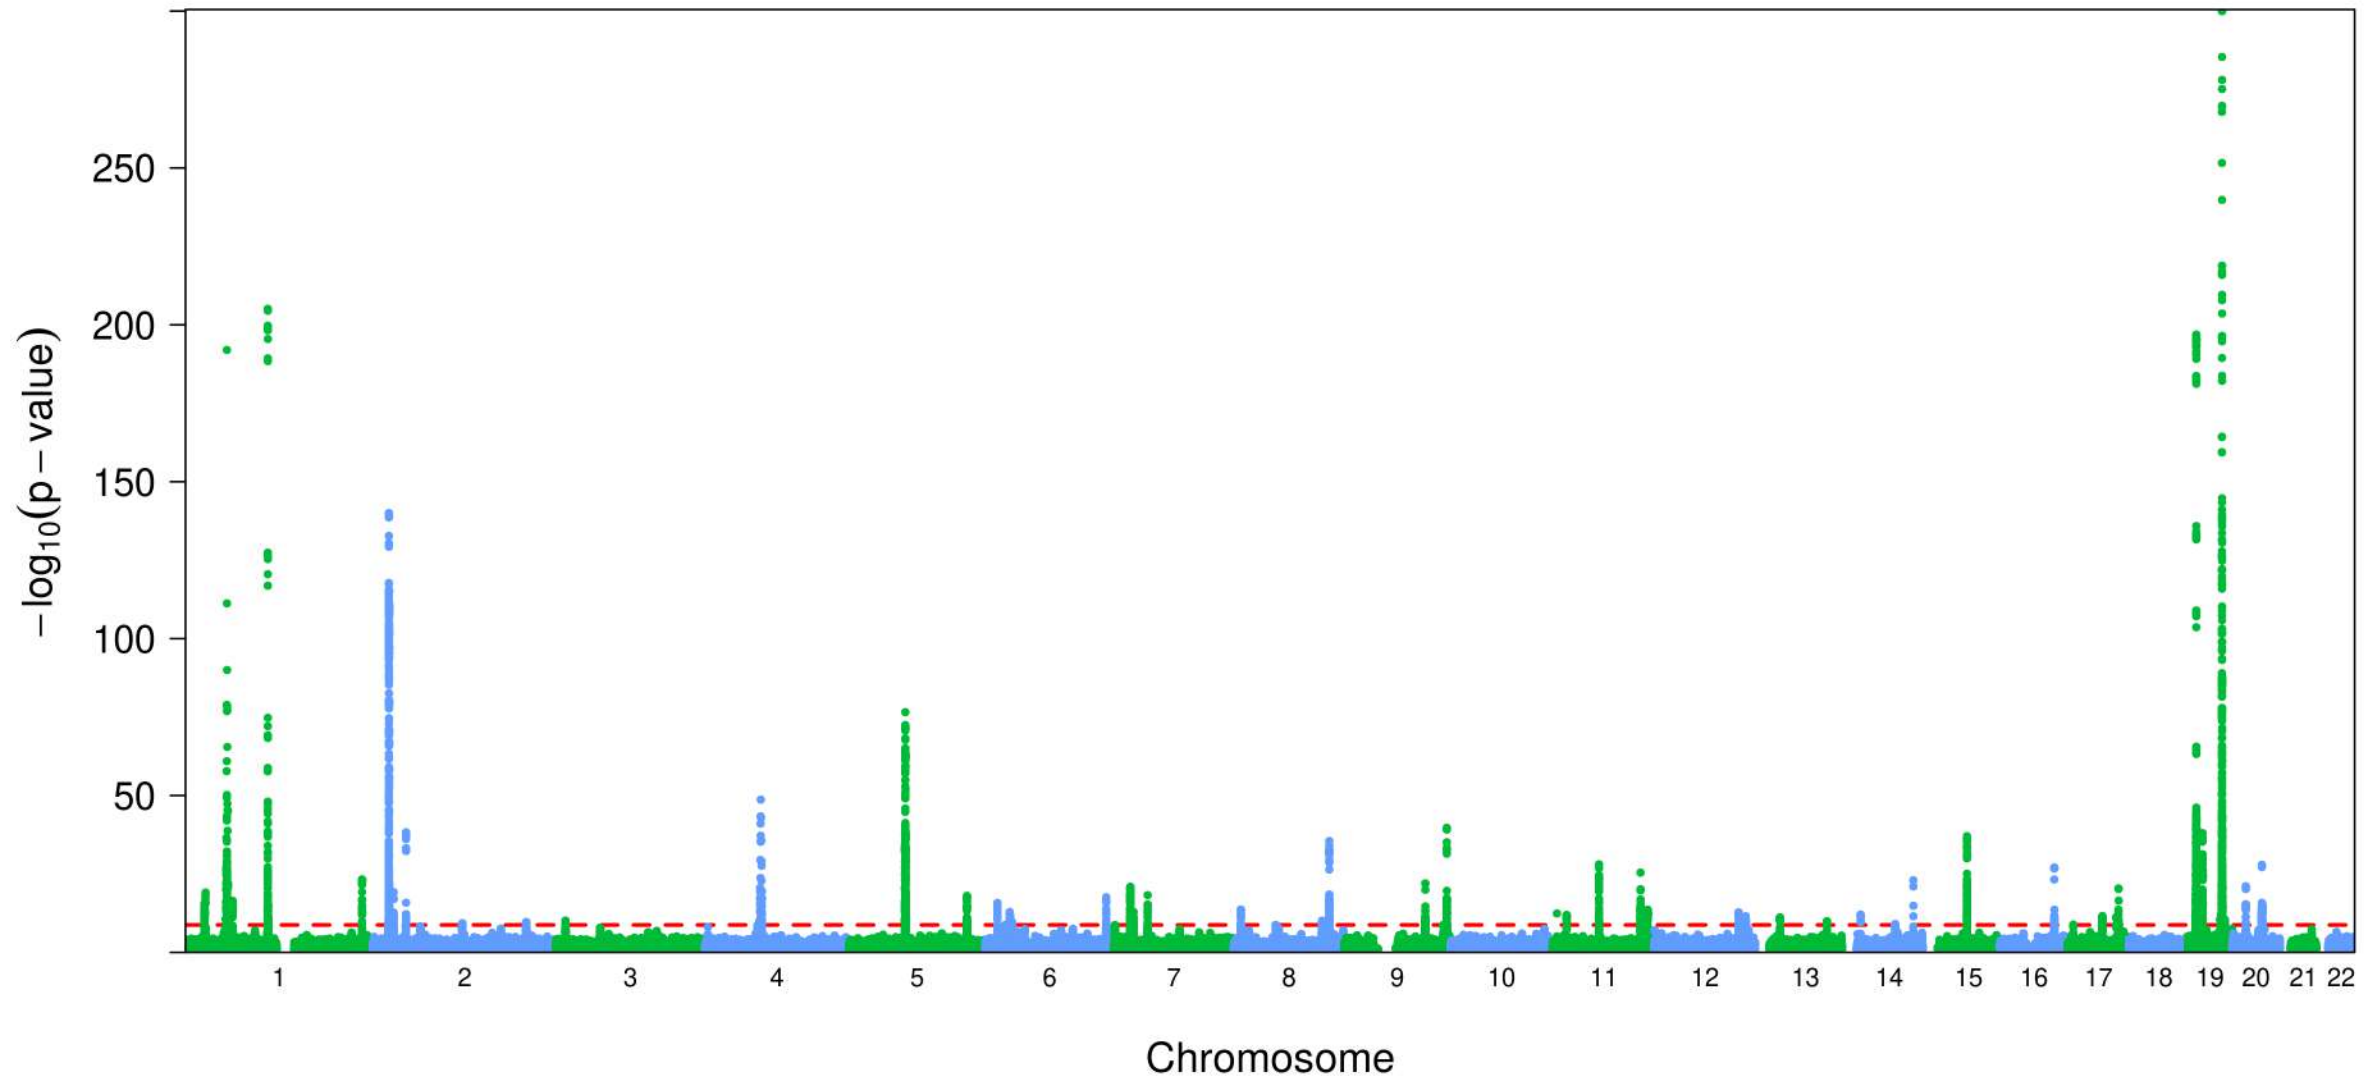

# M-LDL-P

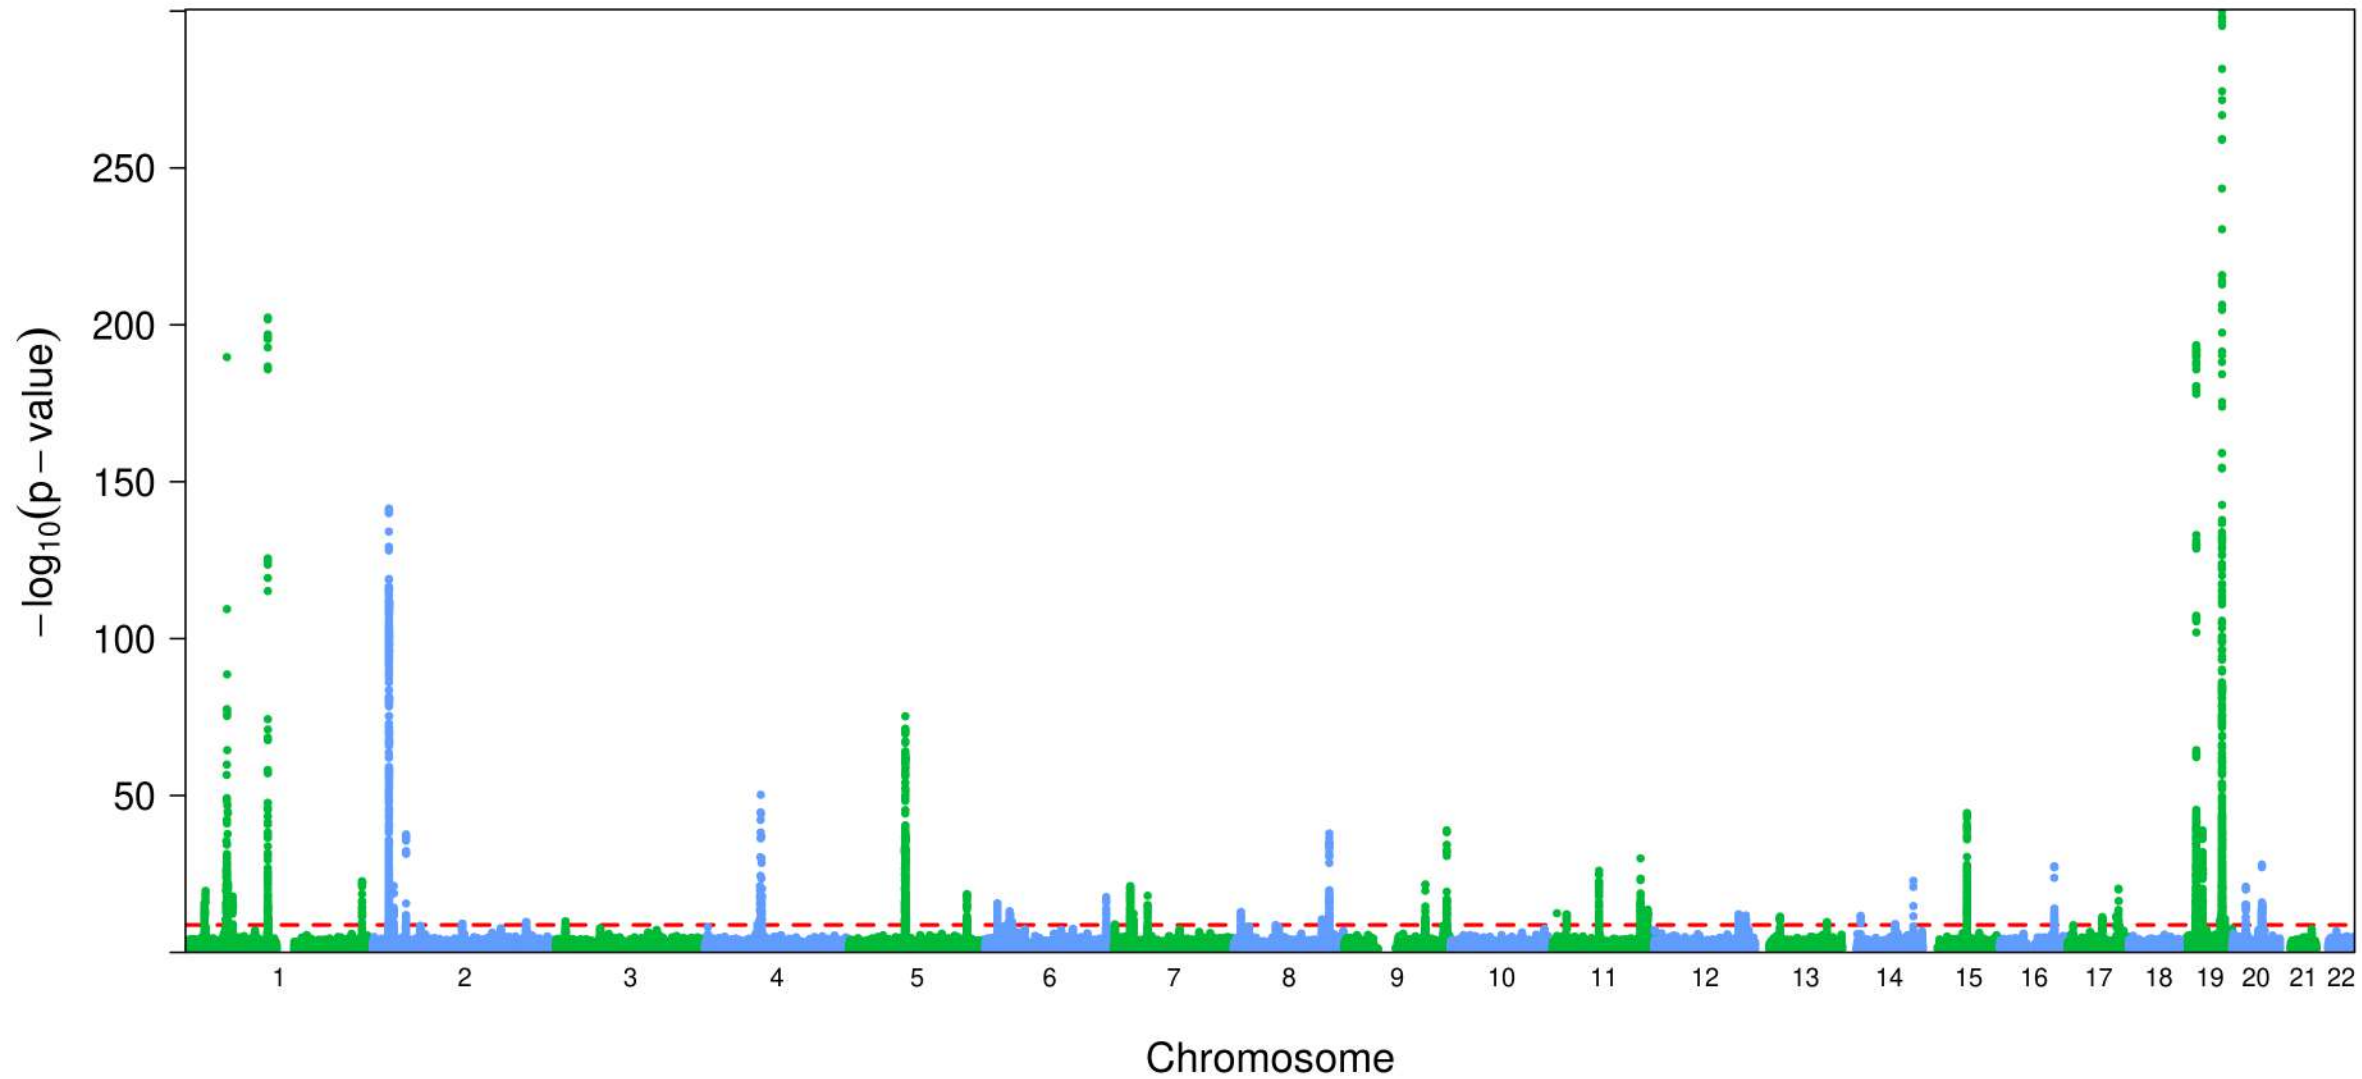

# M-LDL-PL

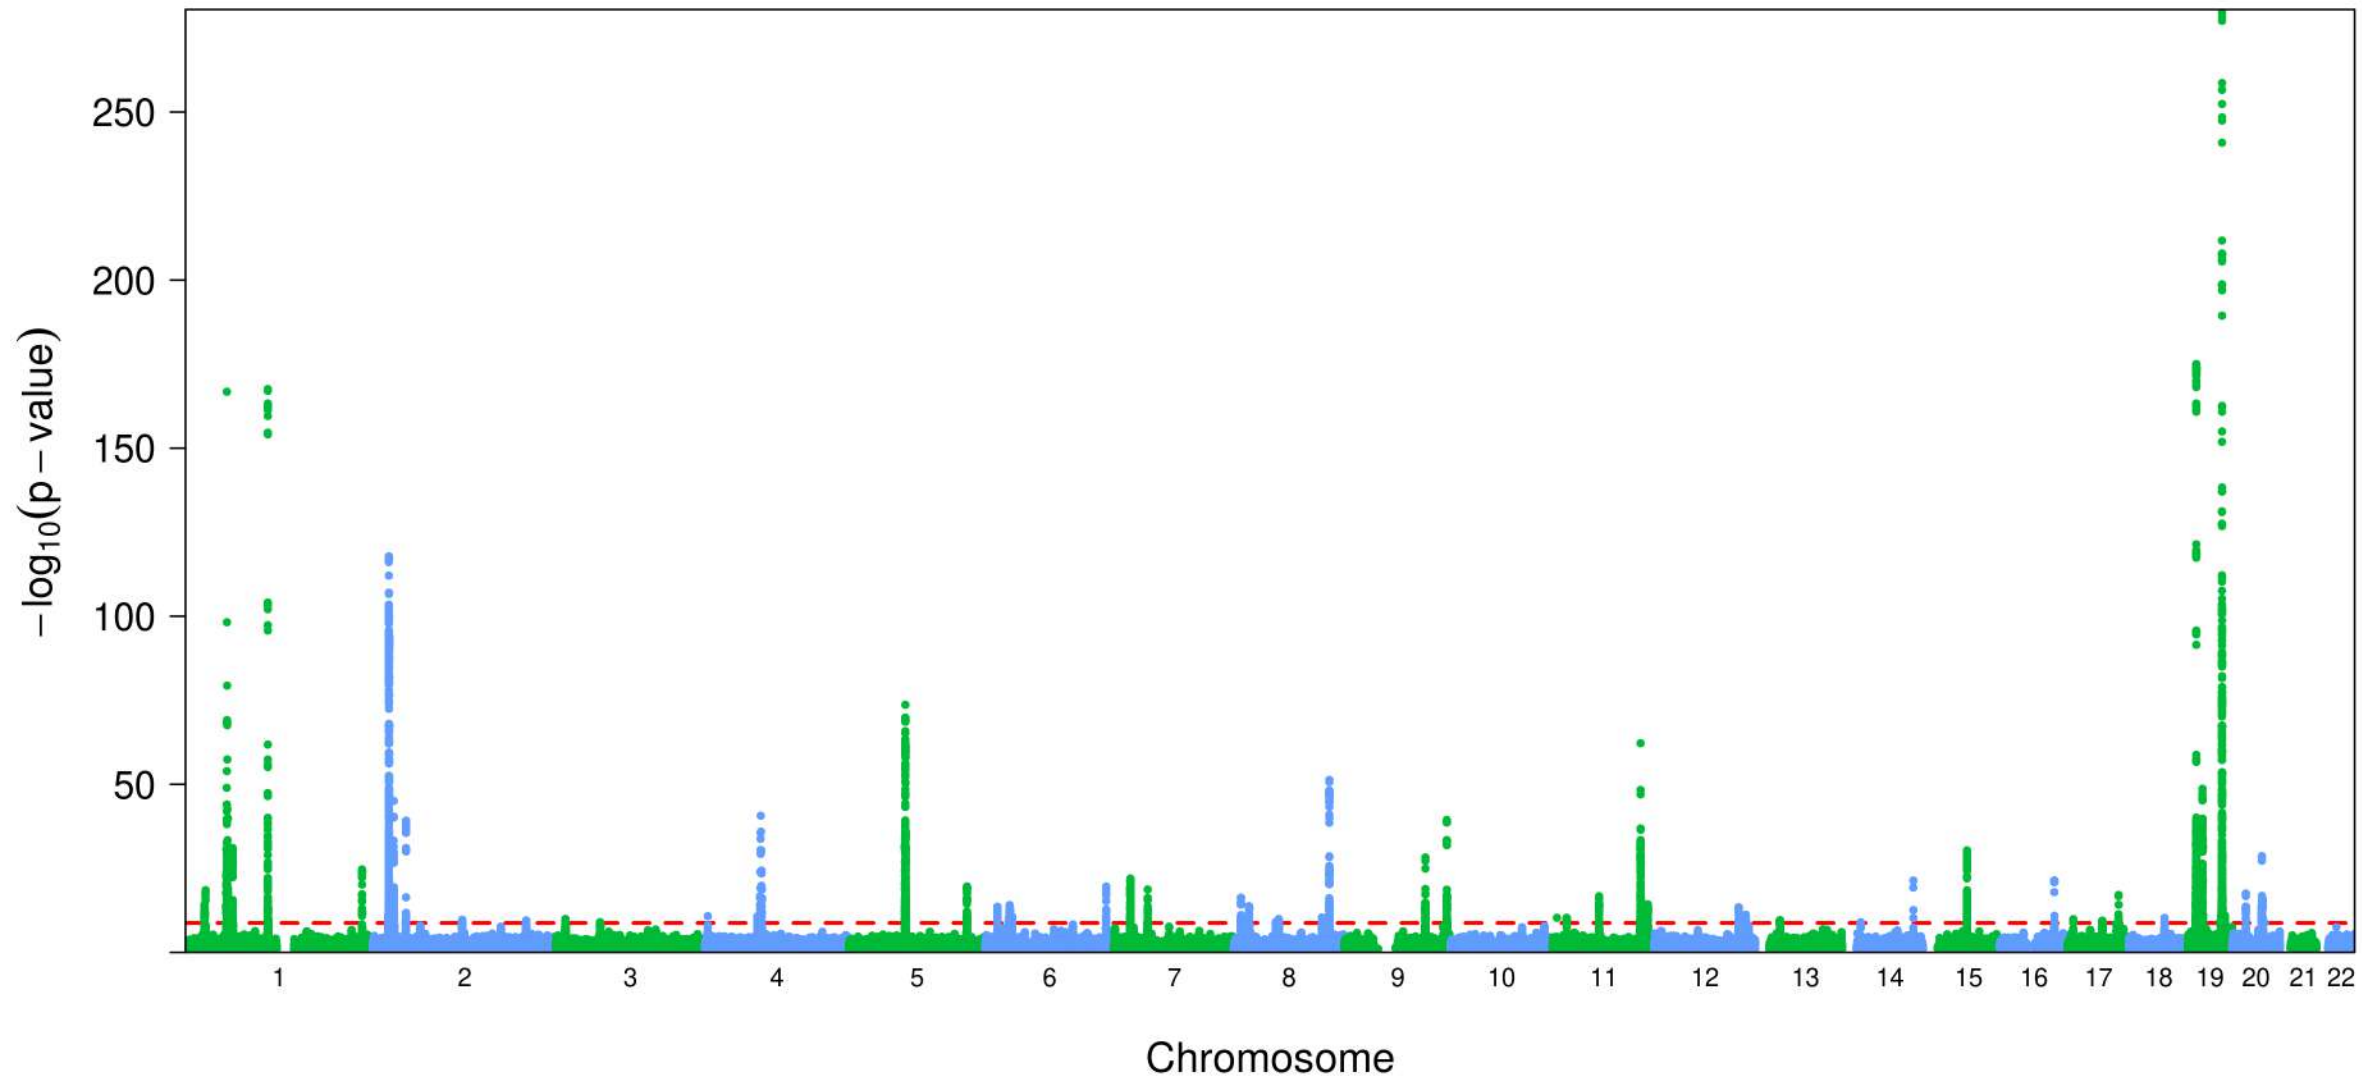

# M-LDL-PL\_percent

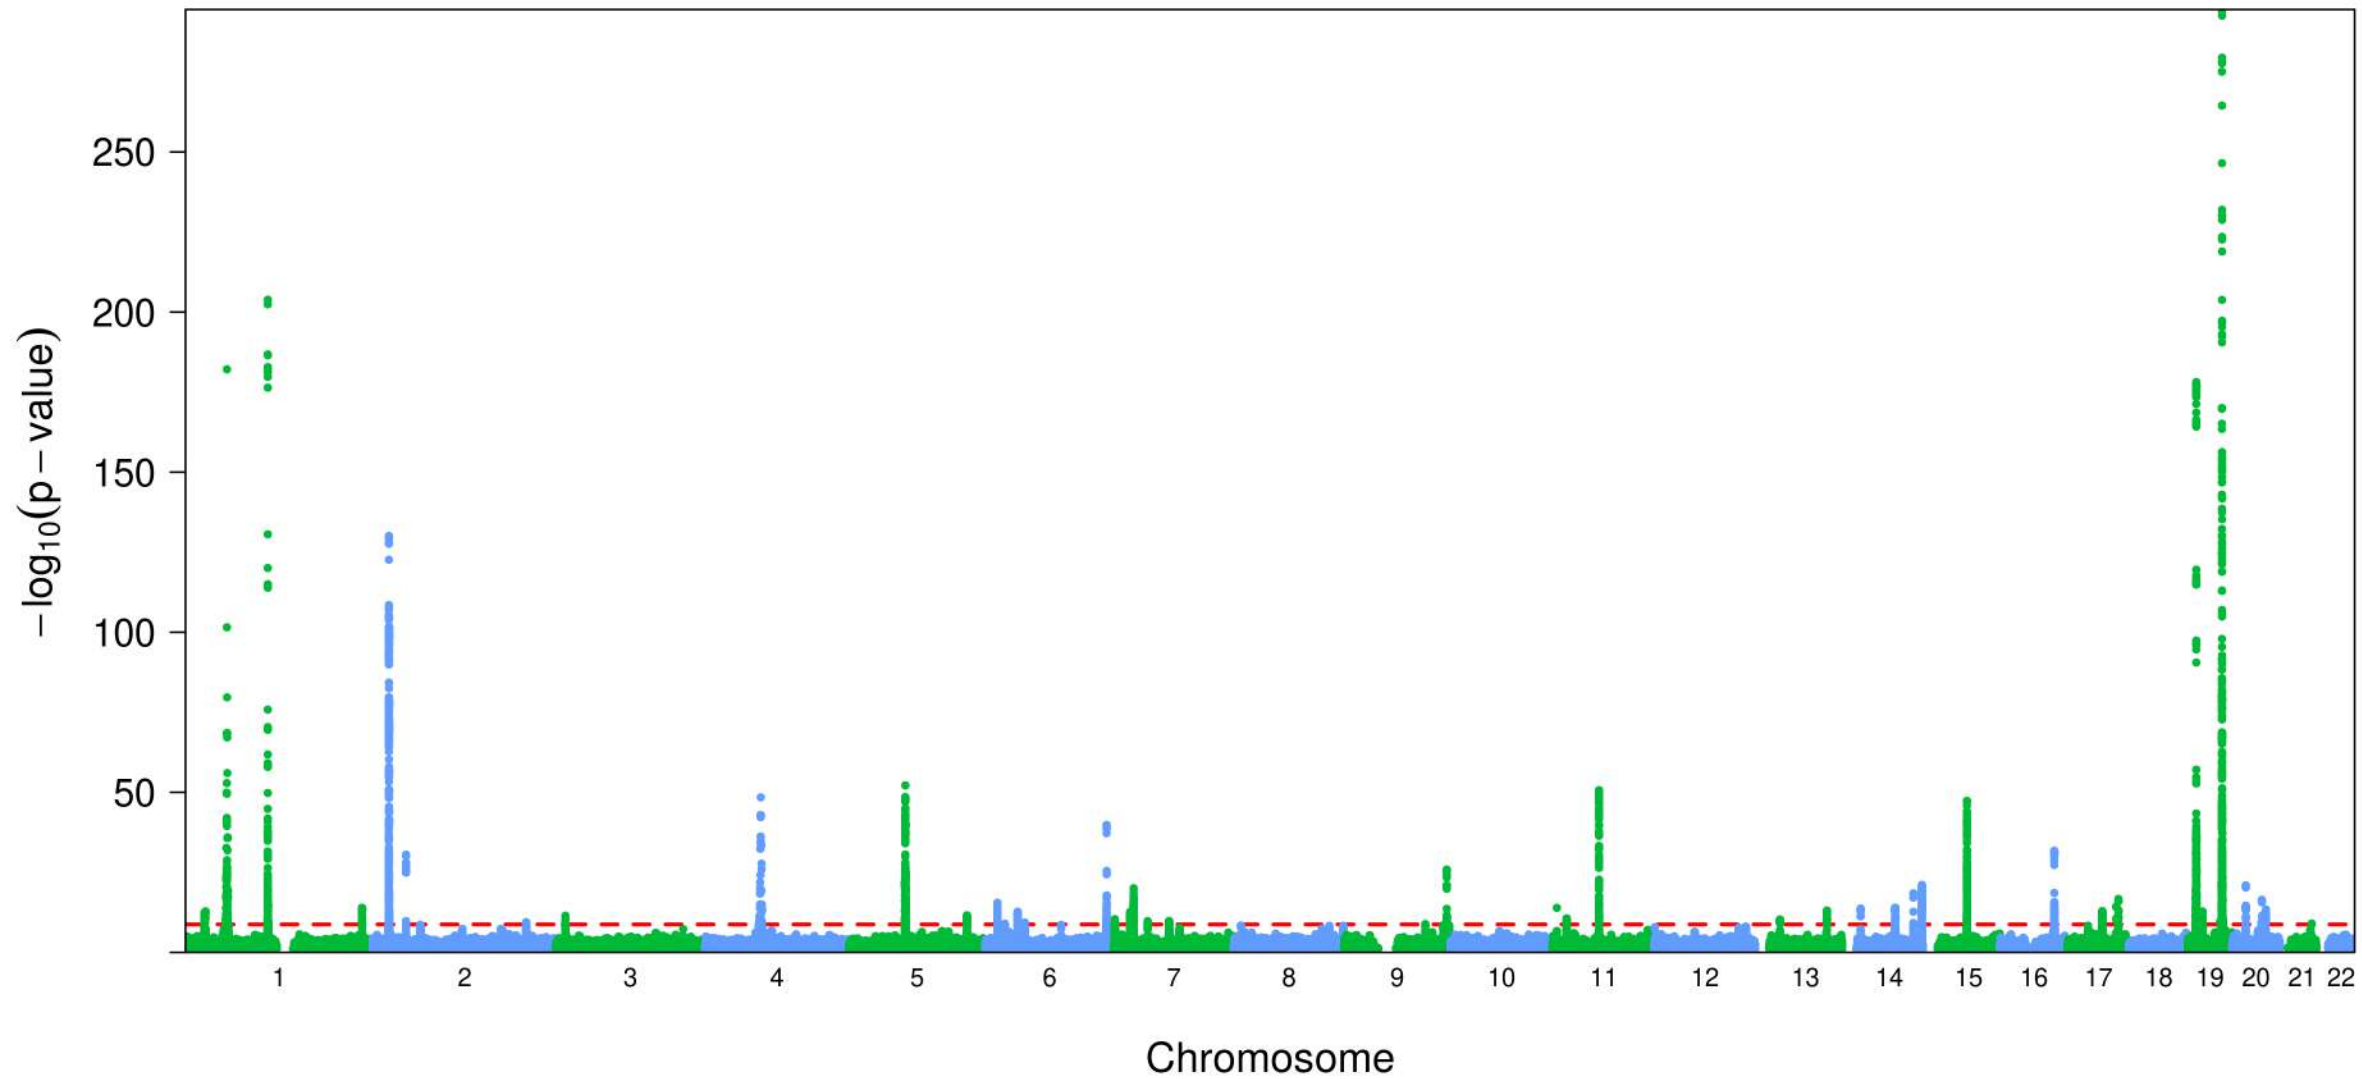



# M-LDL-TG

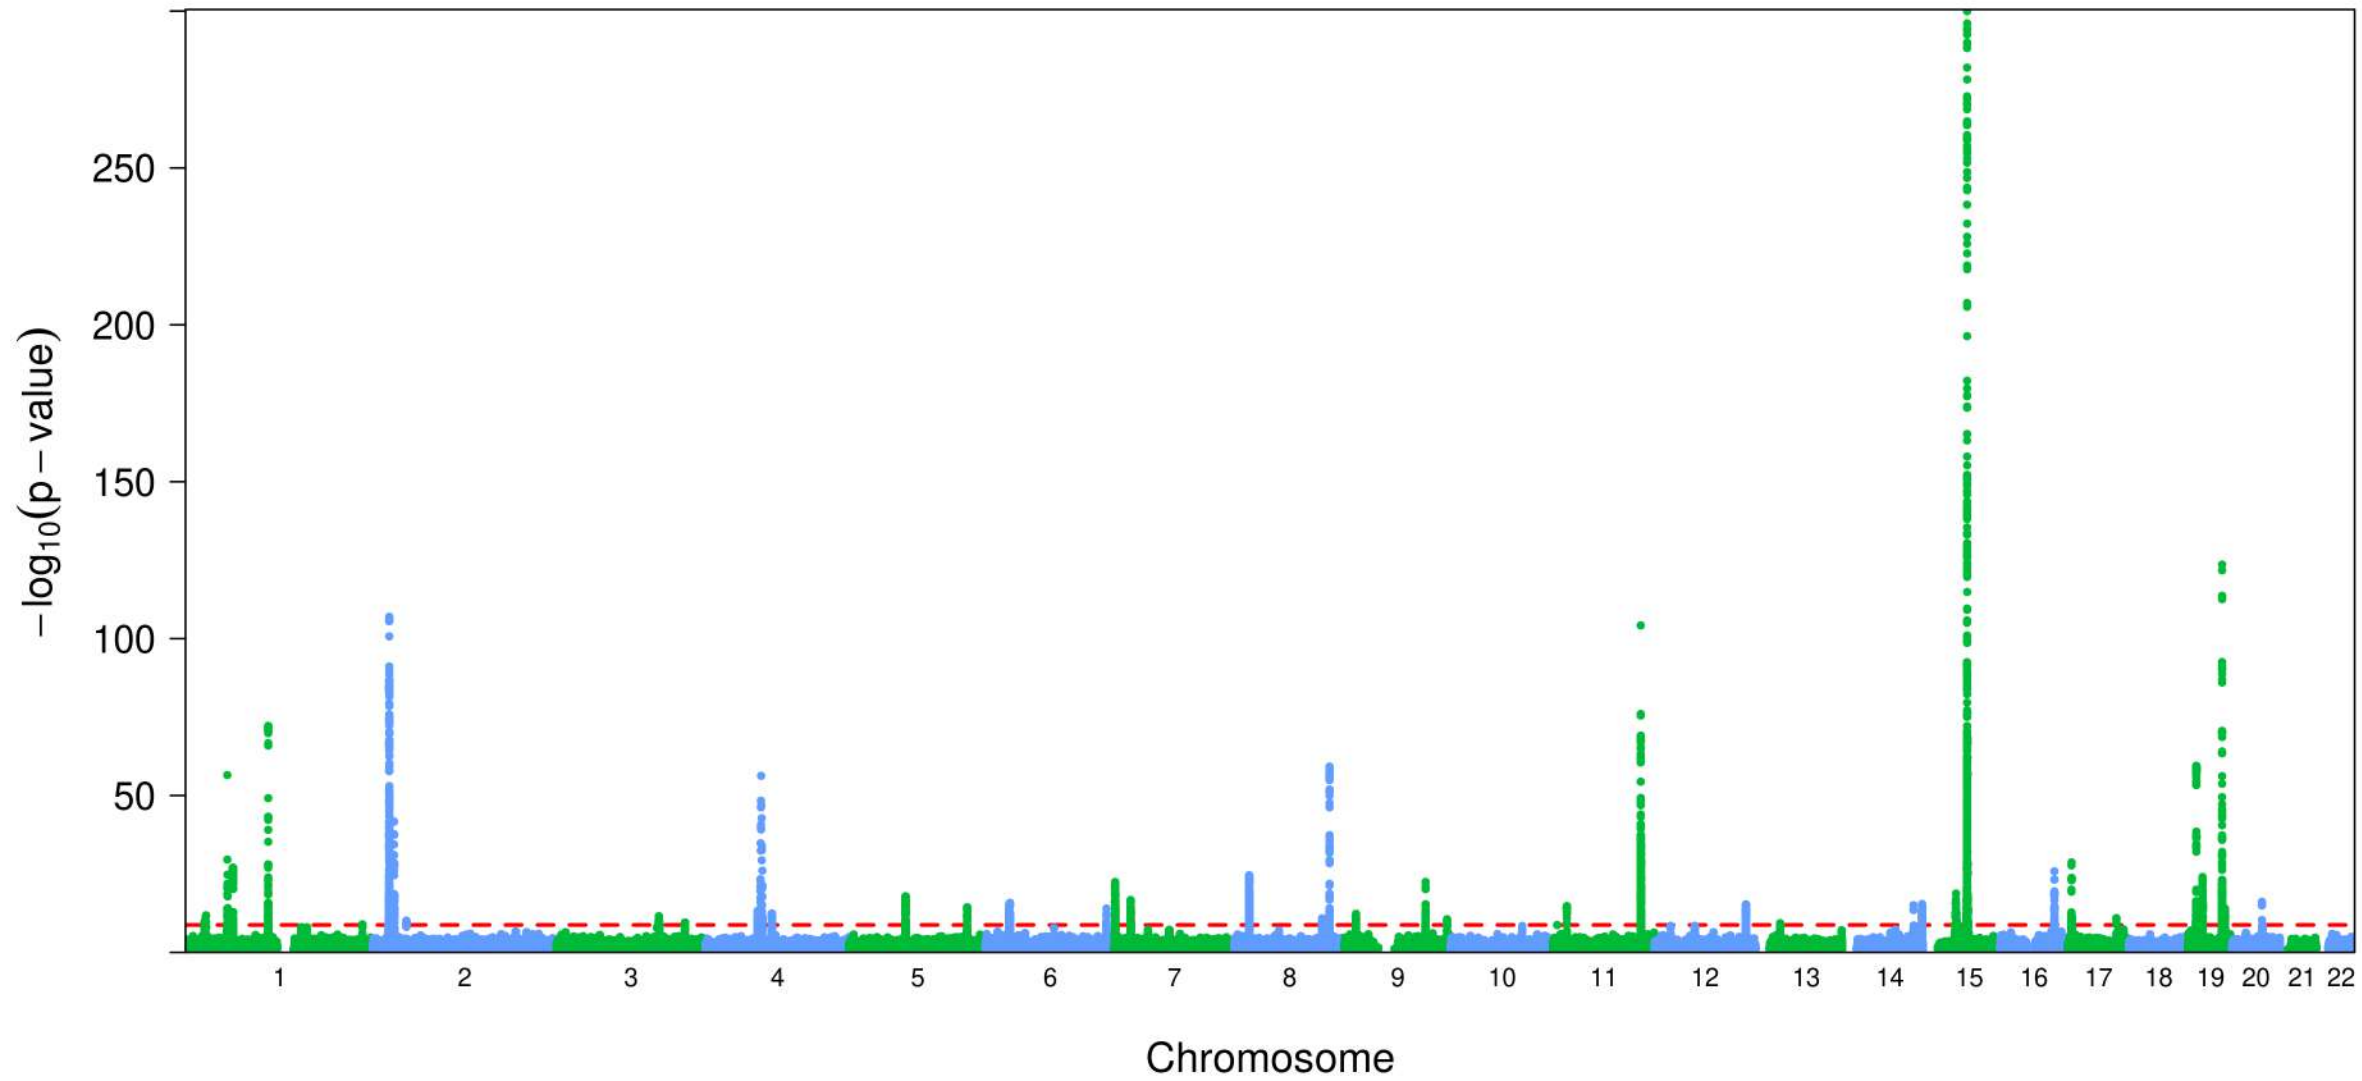

# M-LDL-TG\_percent

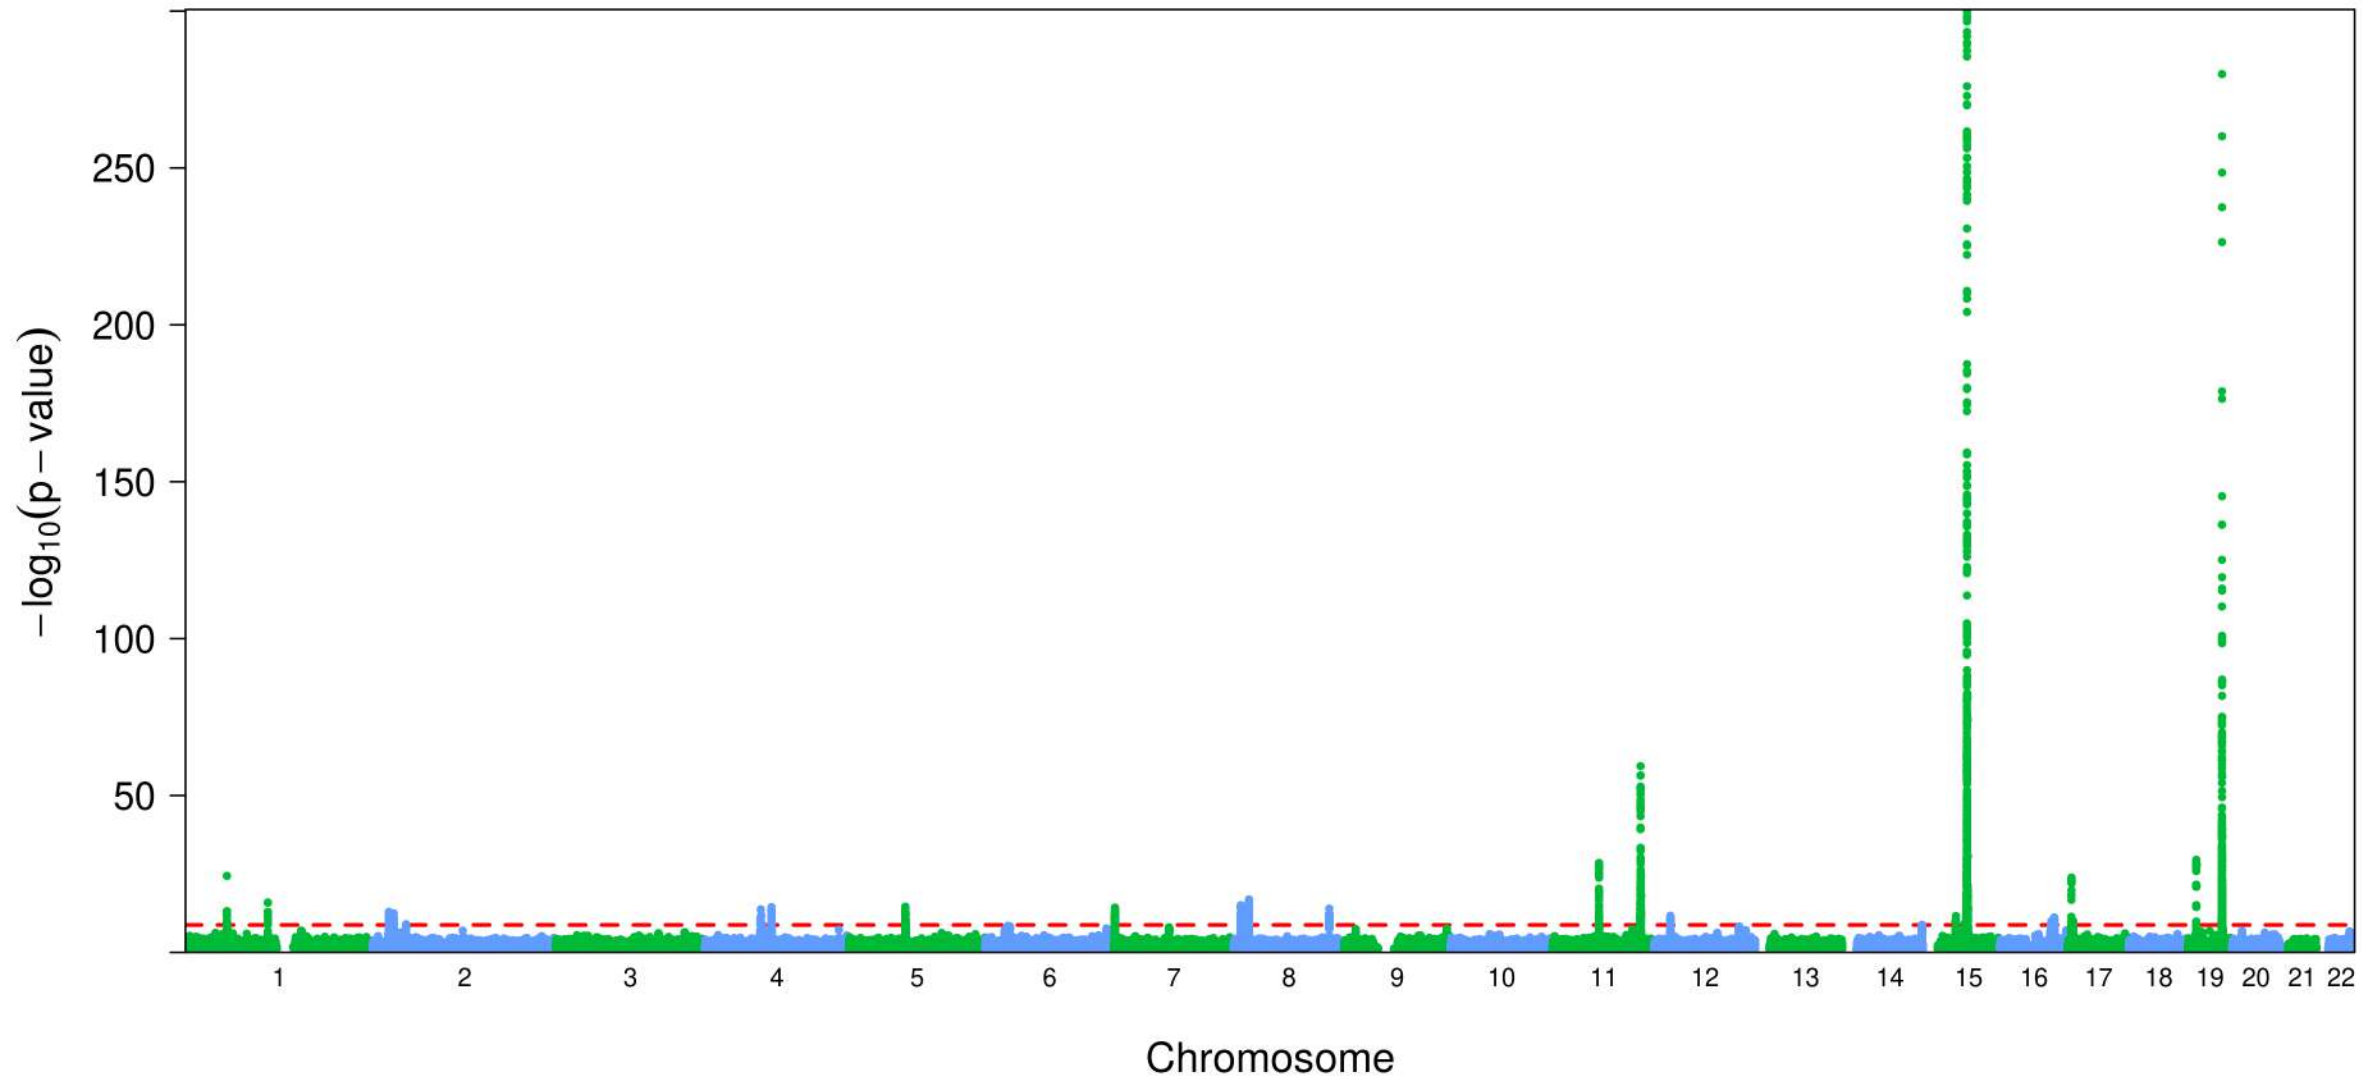

# M-VLDL-C

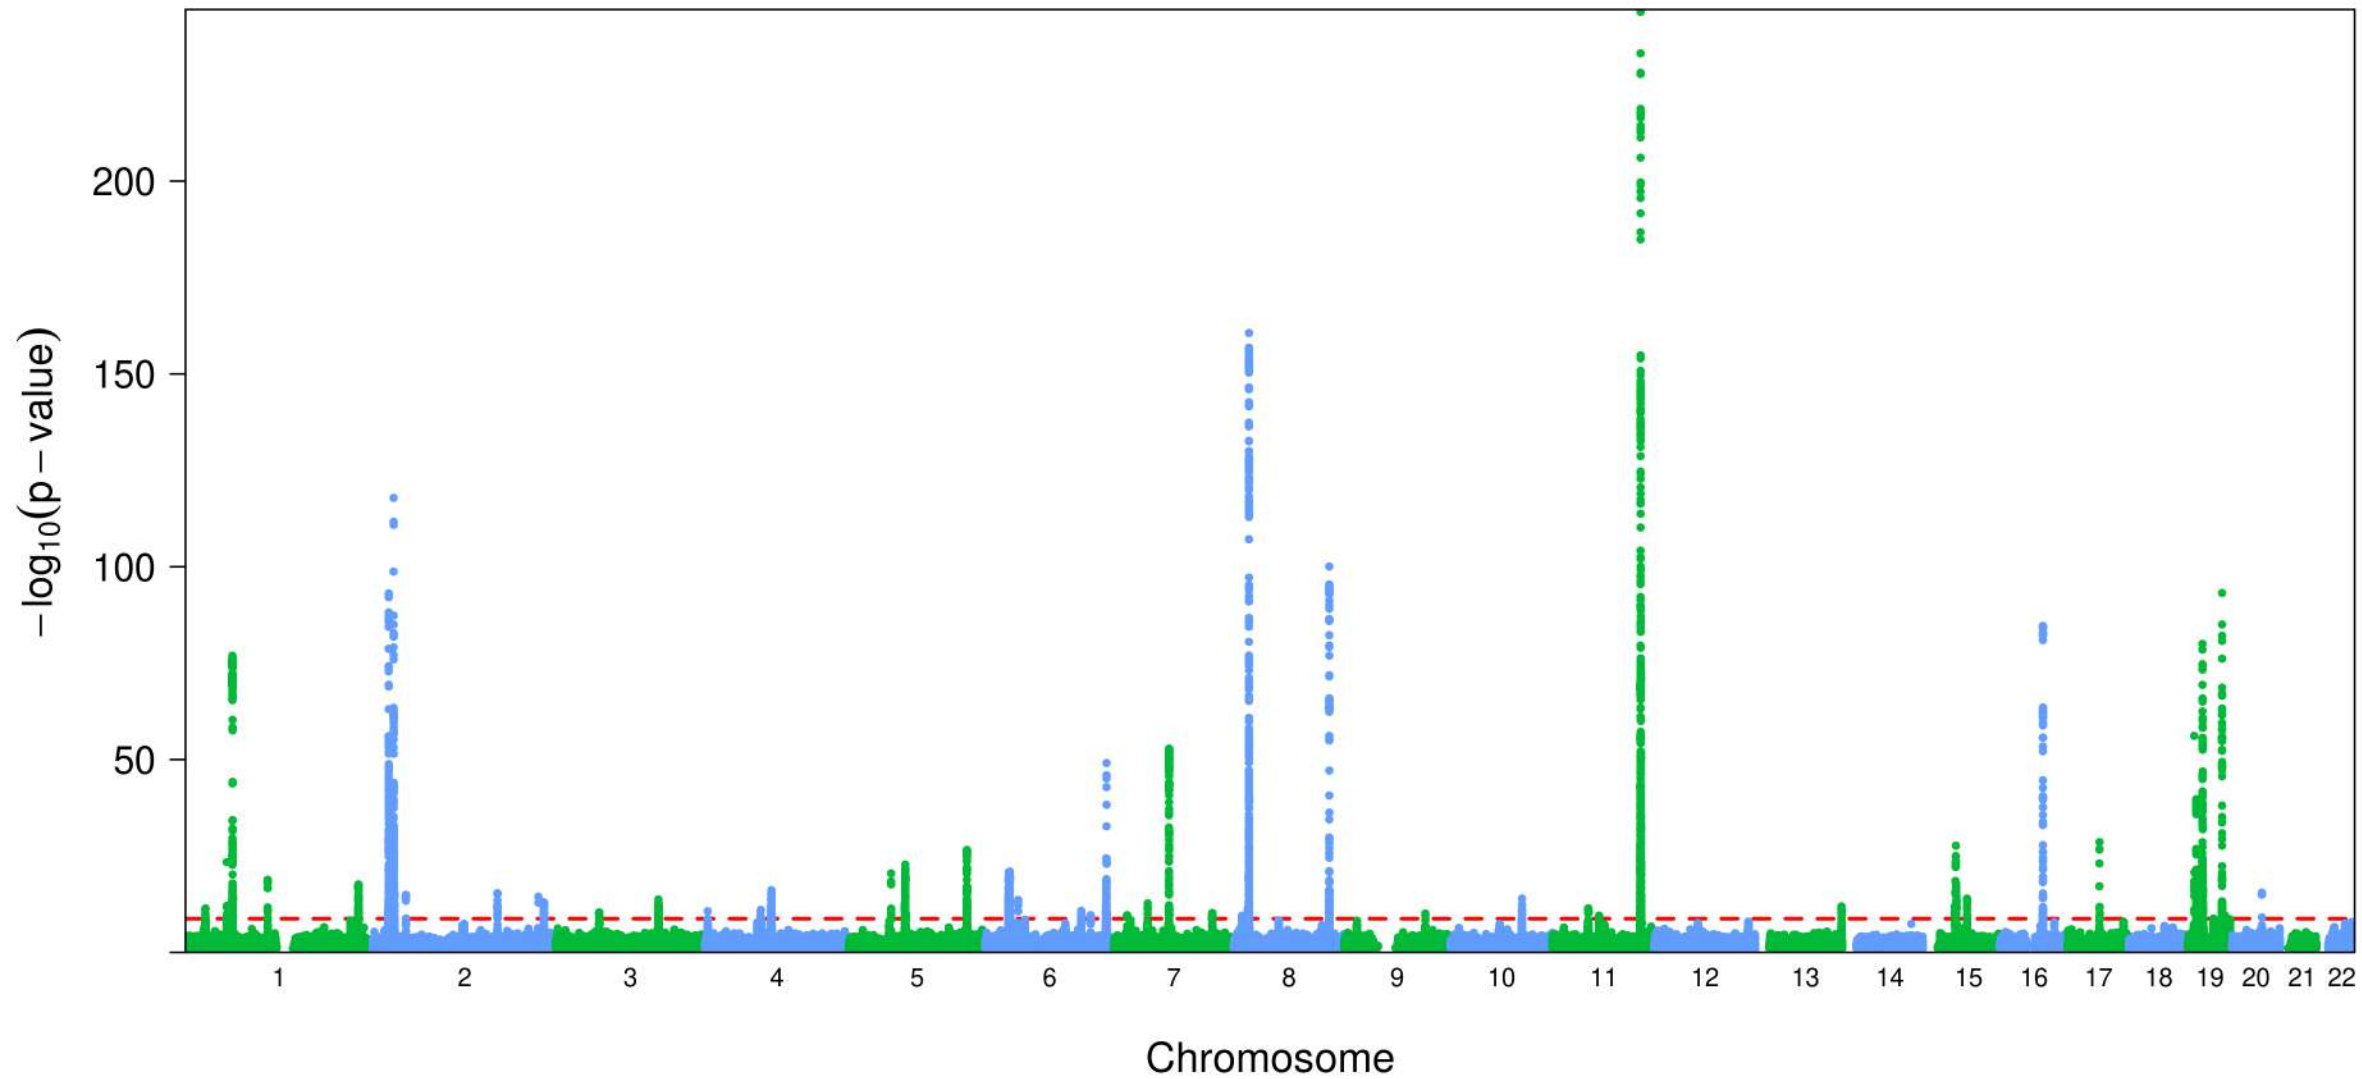

# M-VLDL-C\_percent

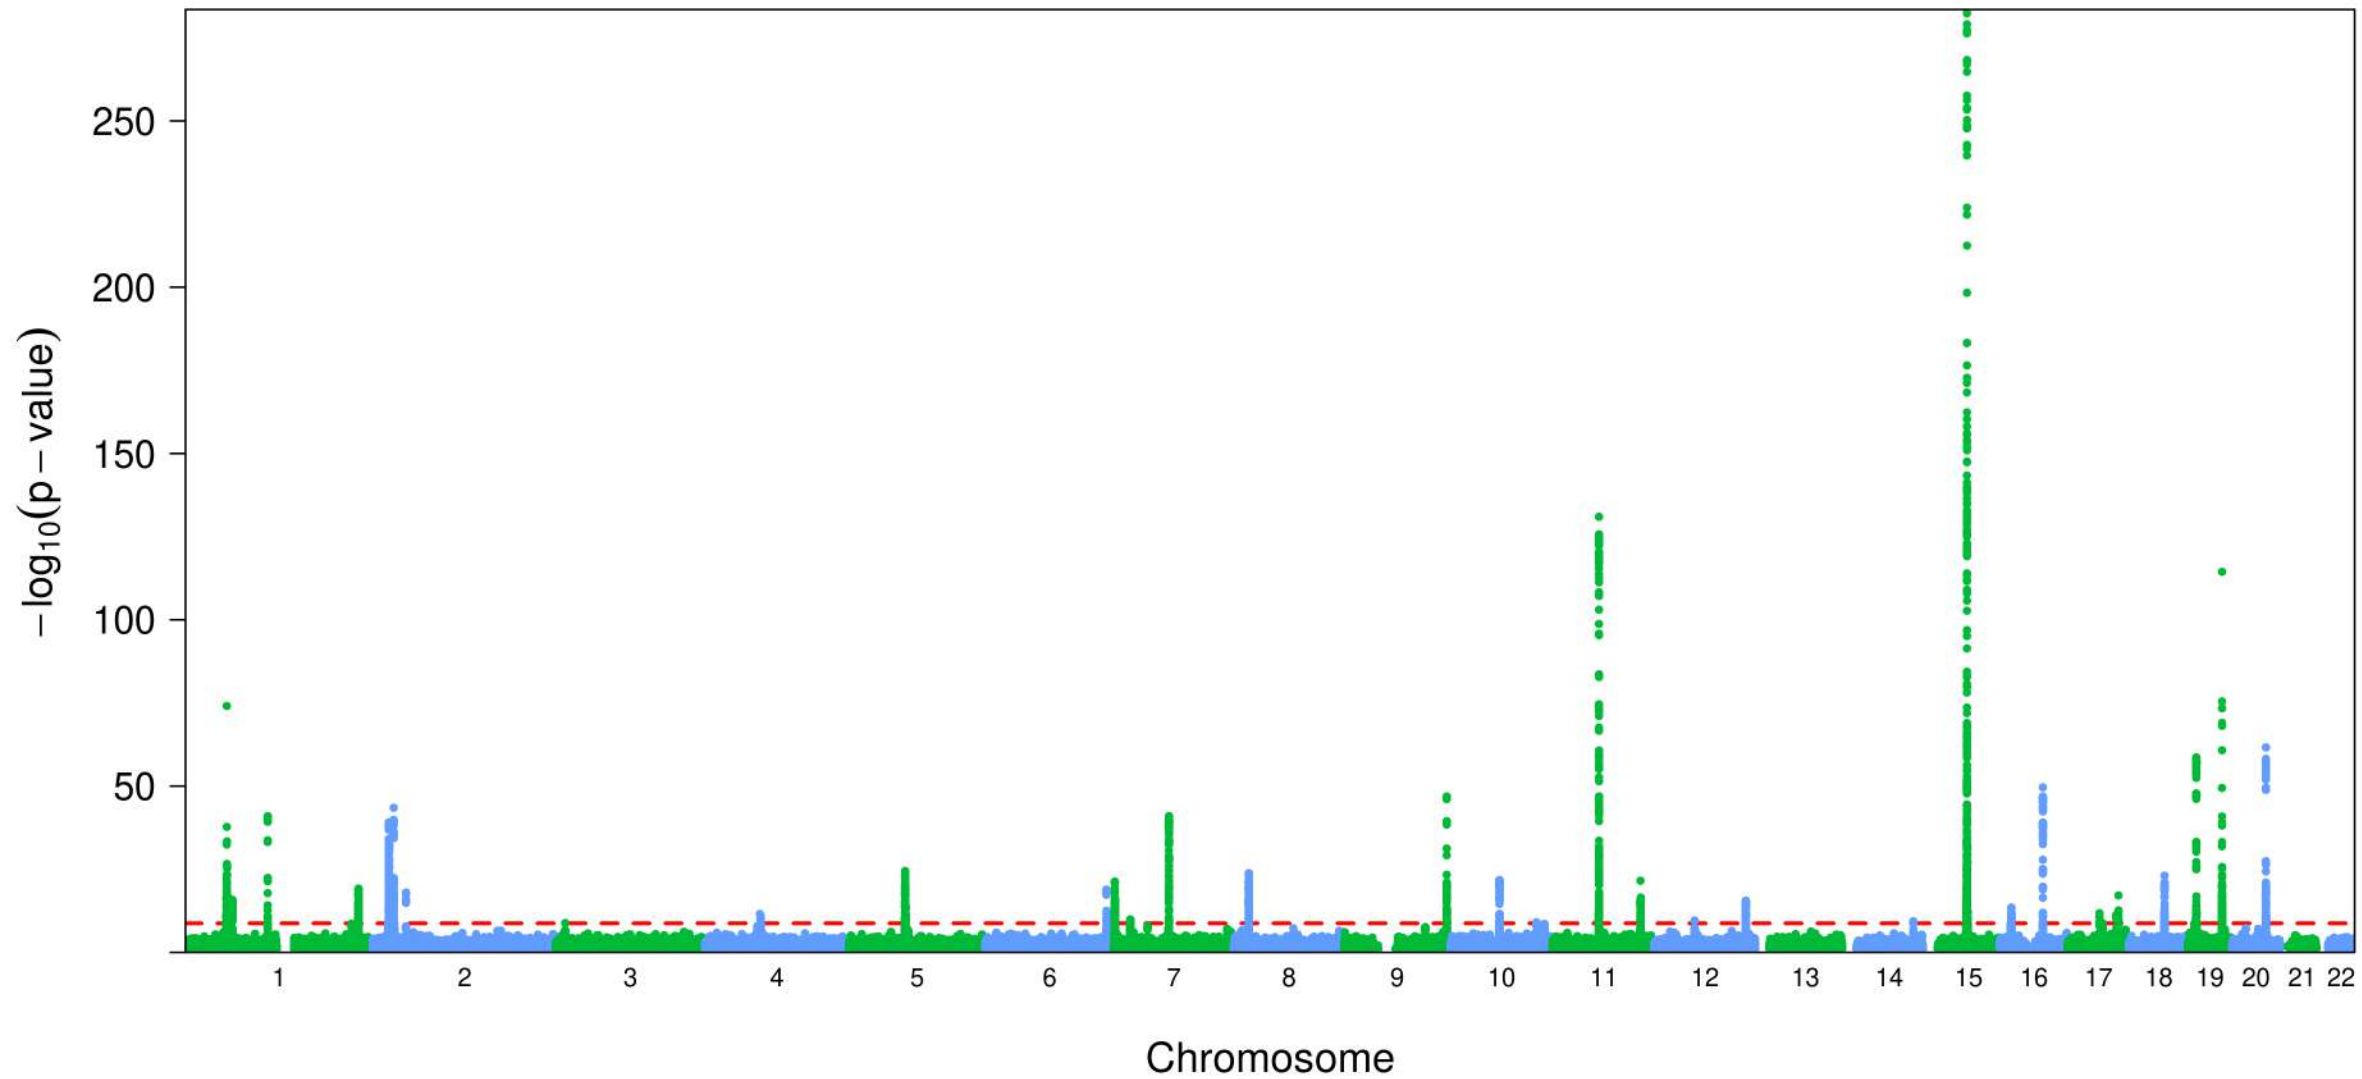

# M-VLDL-CE

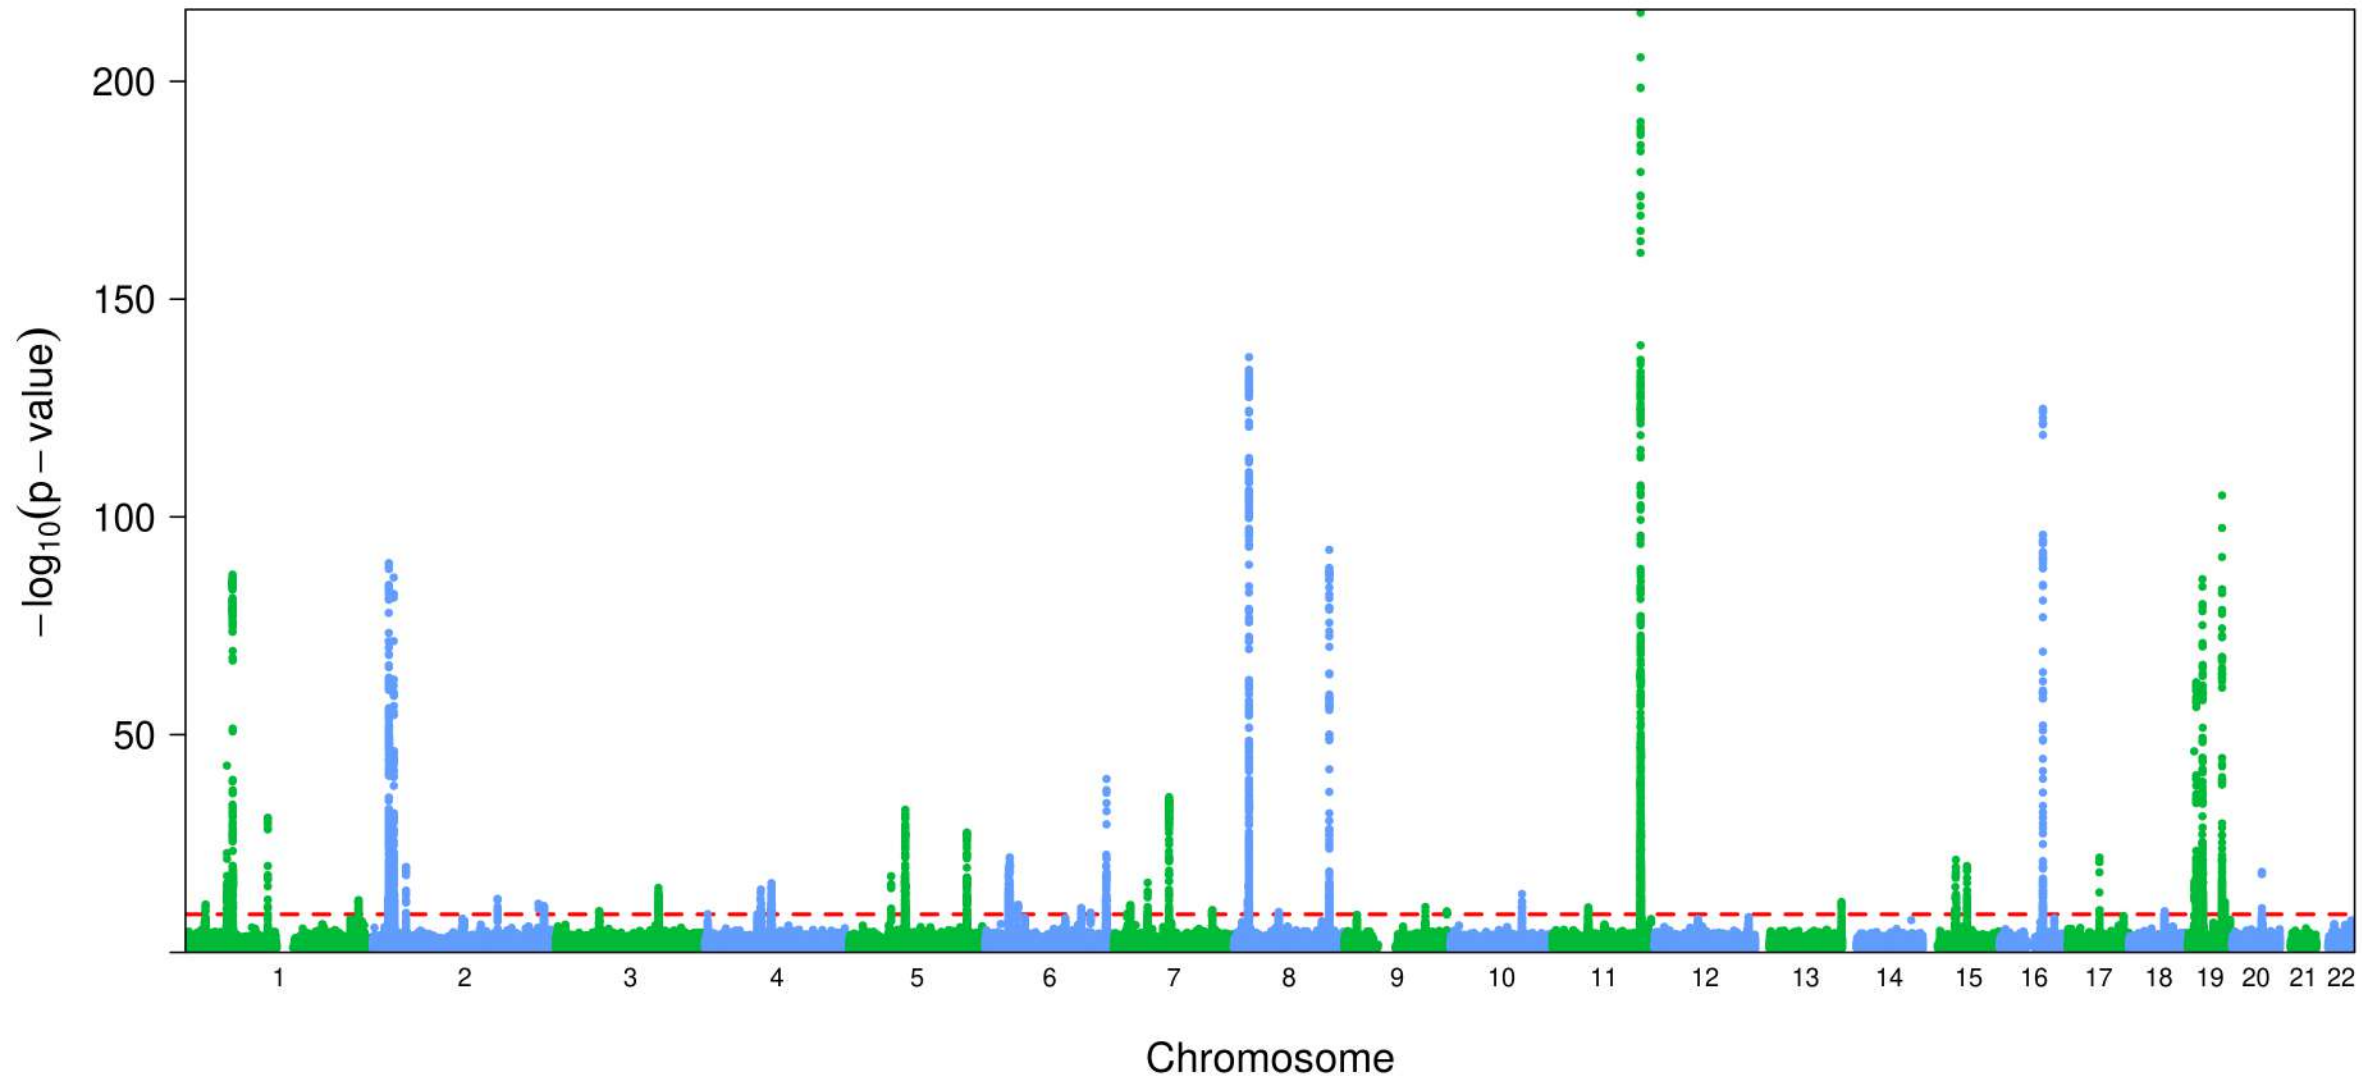

# M-VLDL-CE\_percent

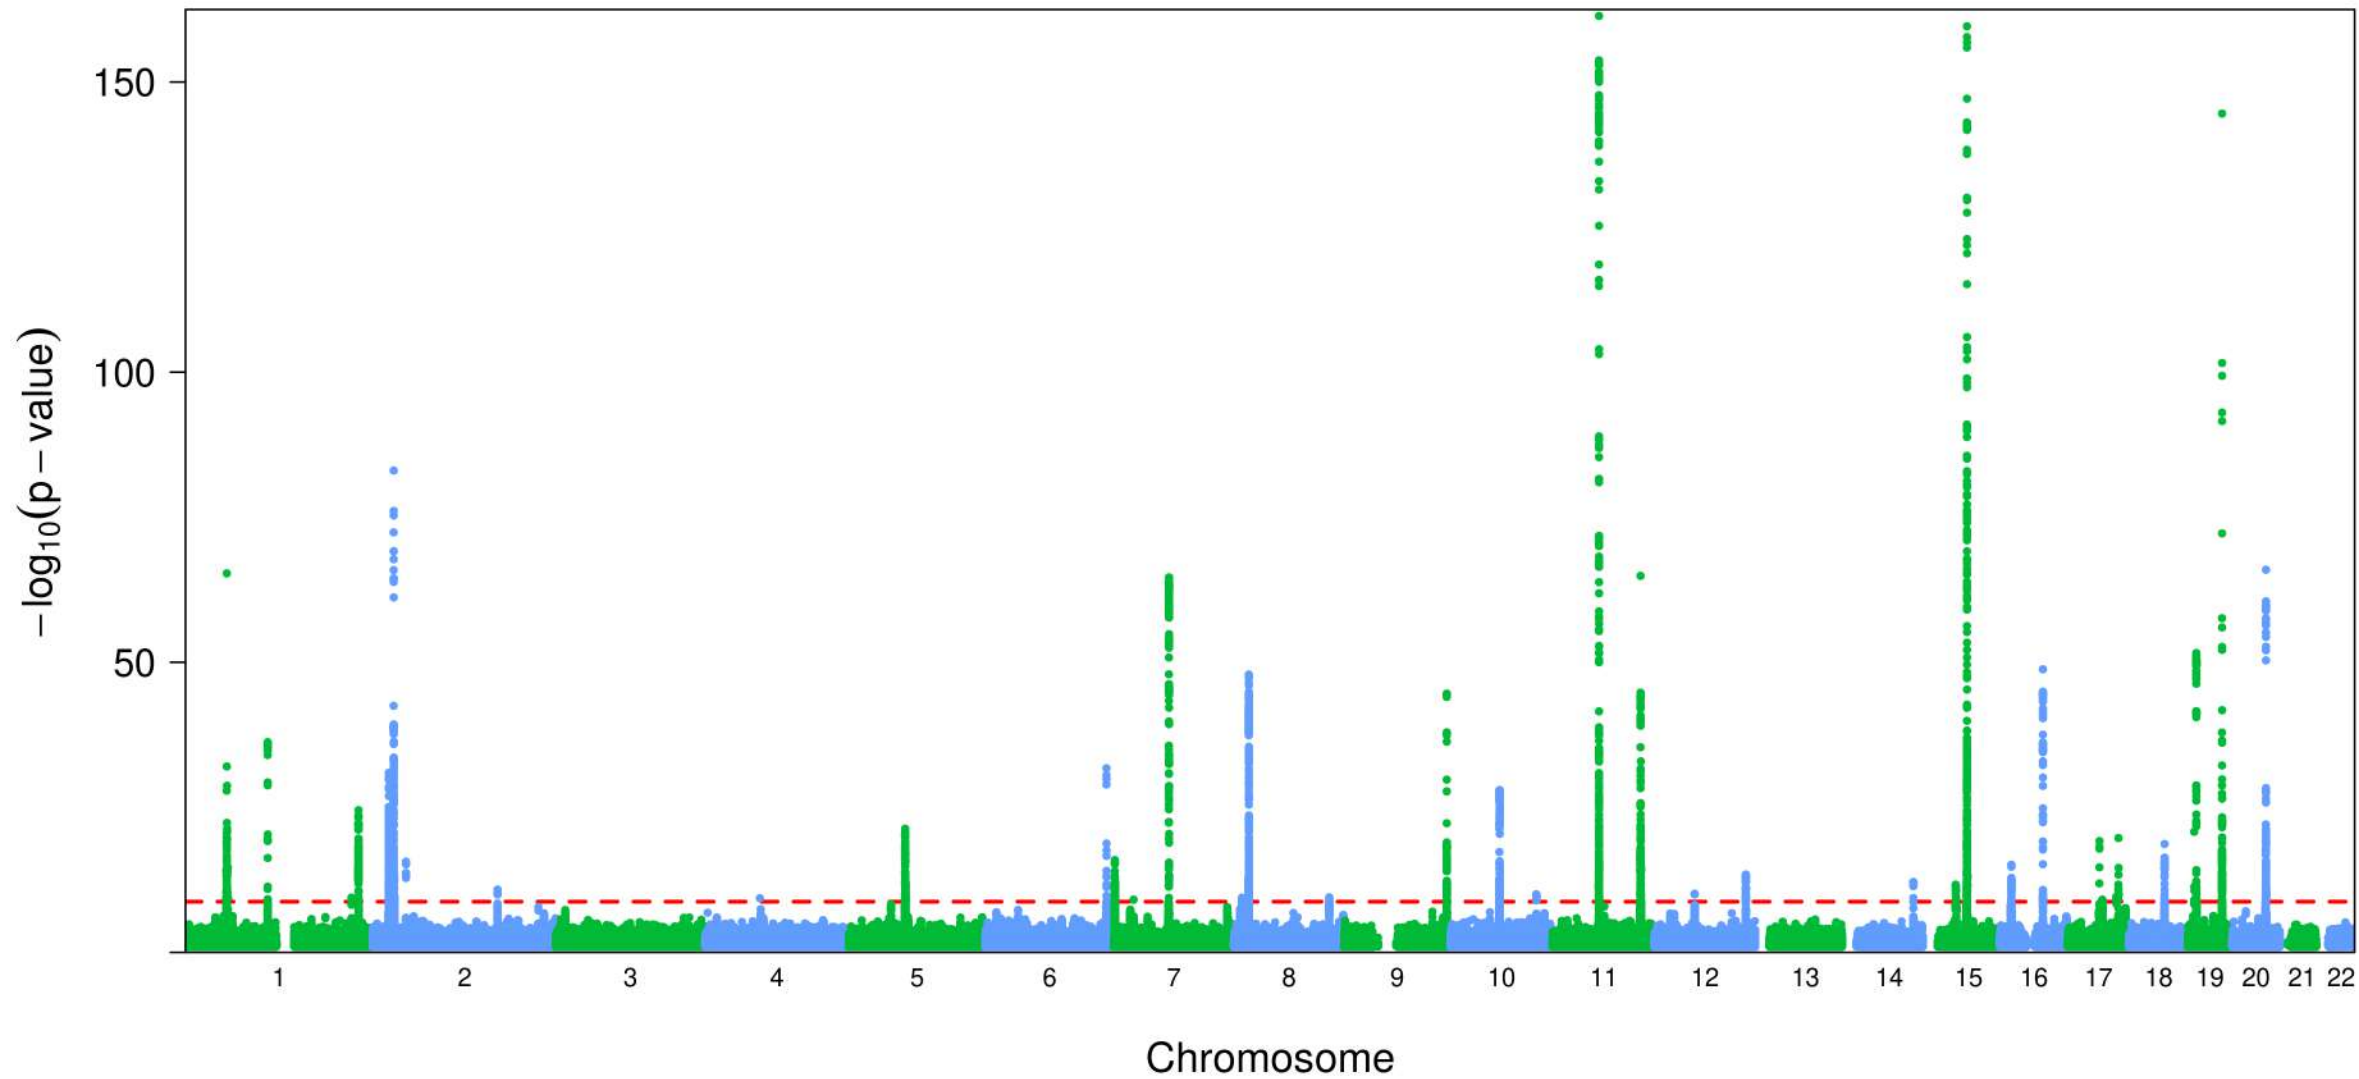

# M-VLDDL-FC

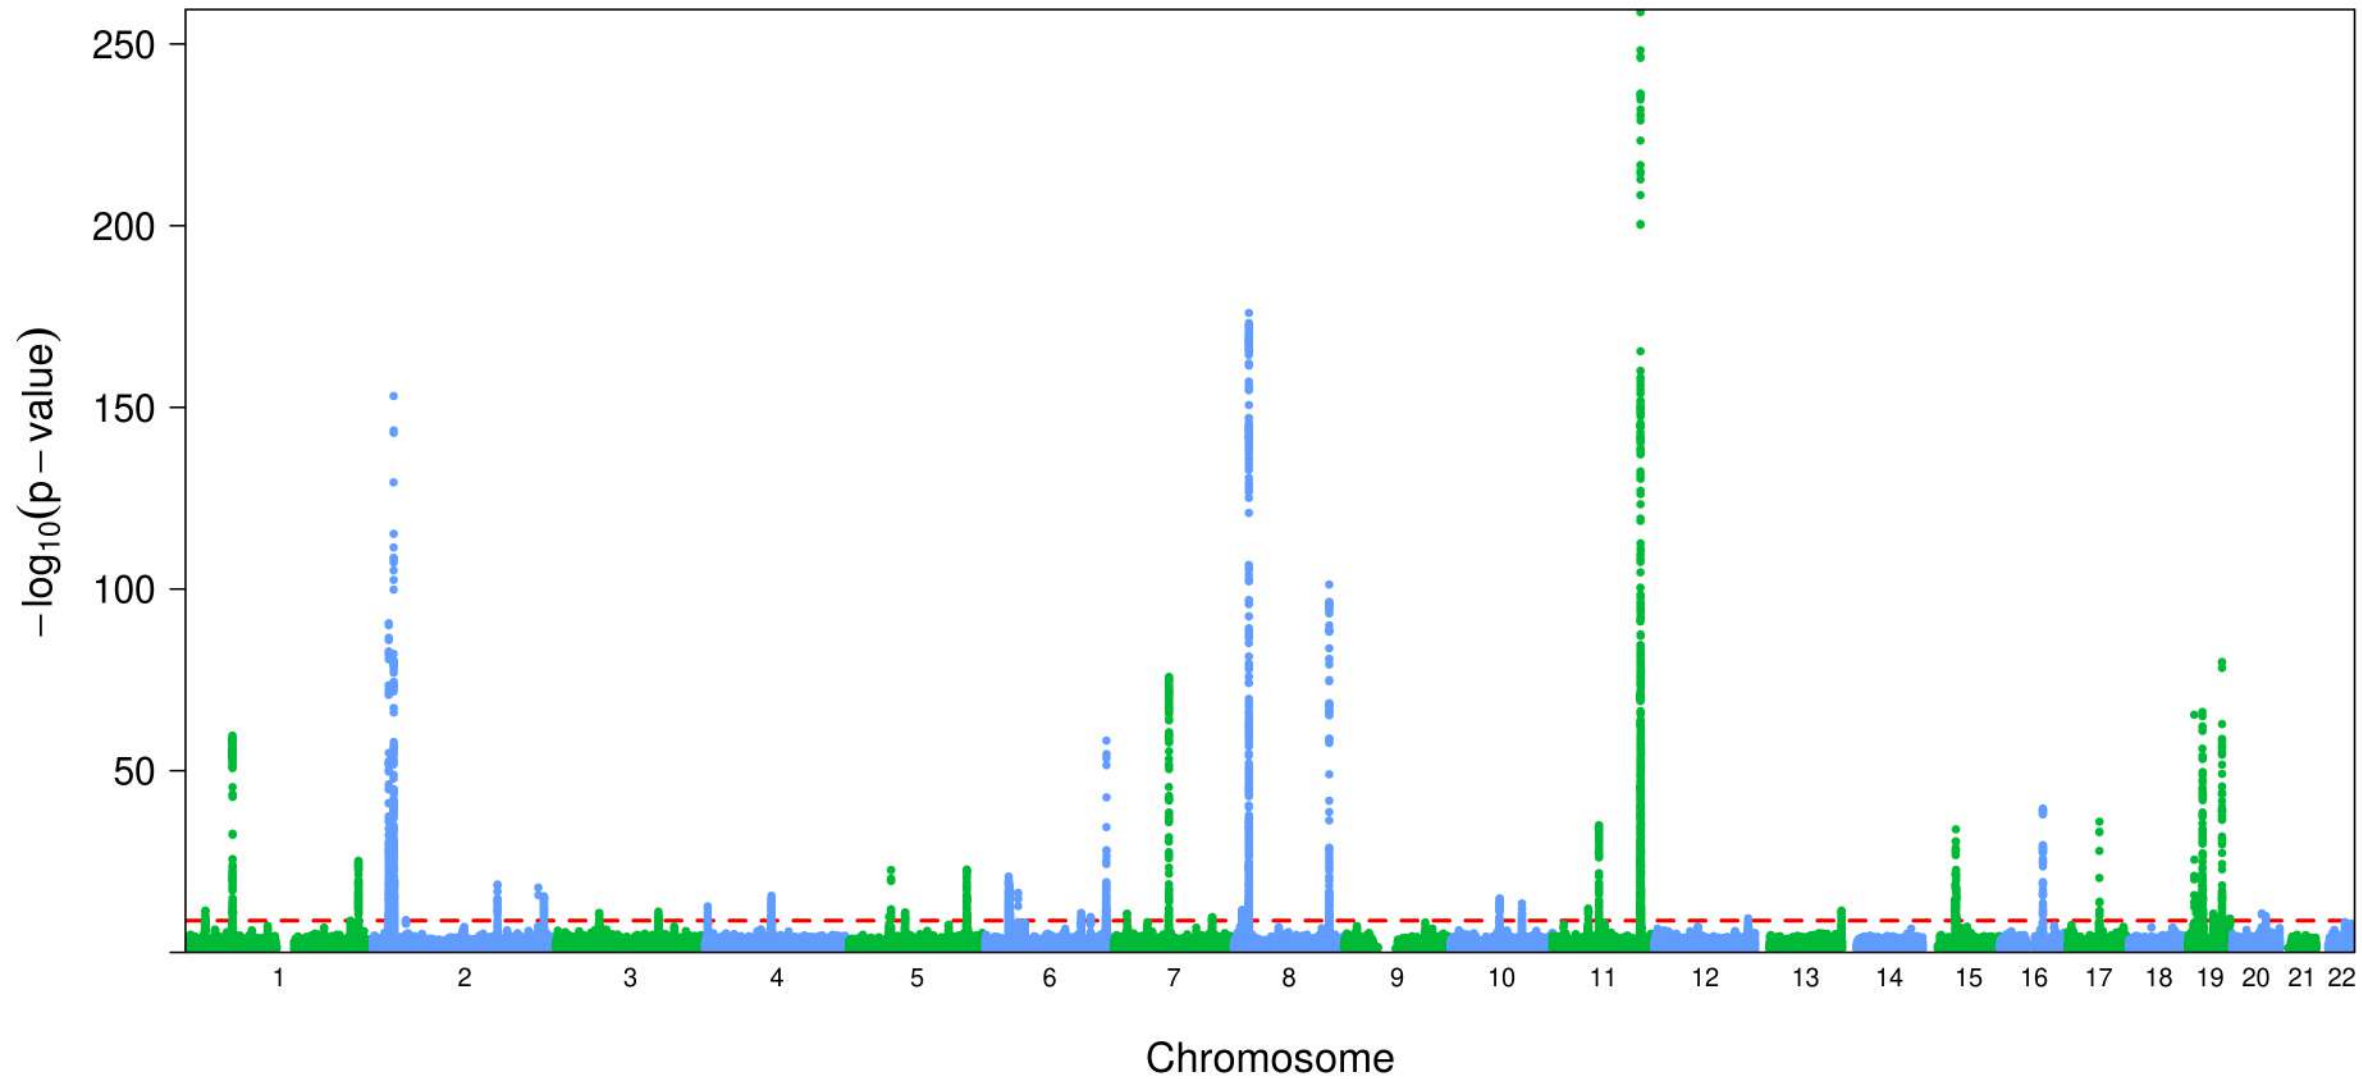

# M-VLDL-FC\_percent

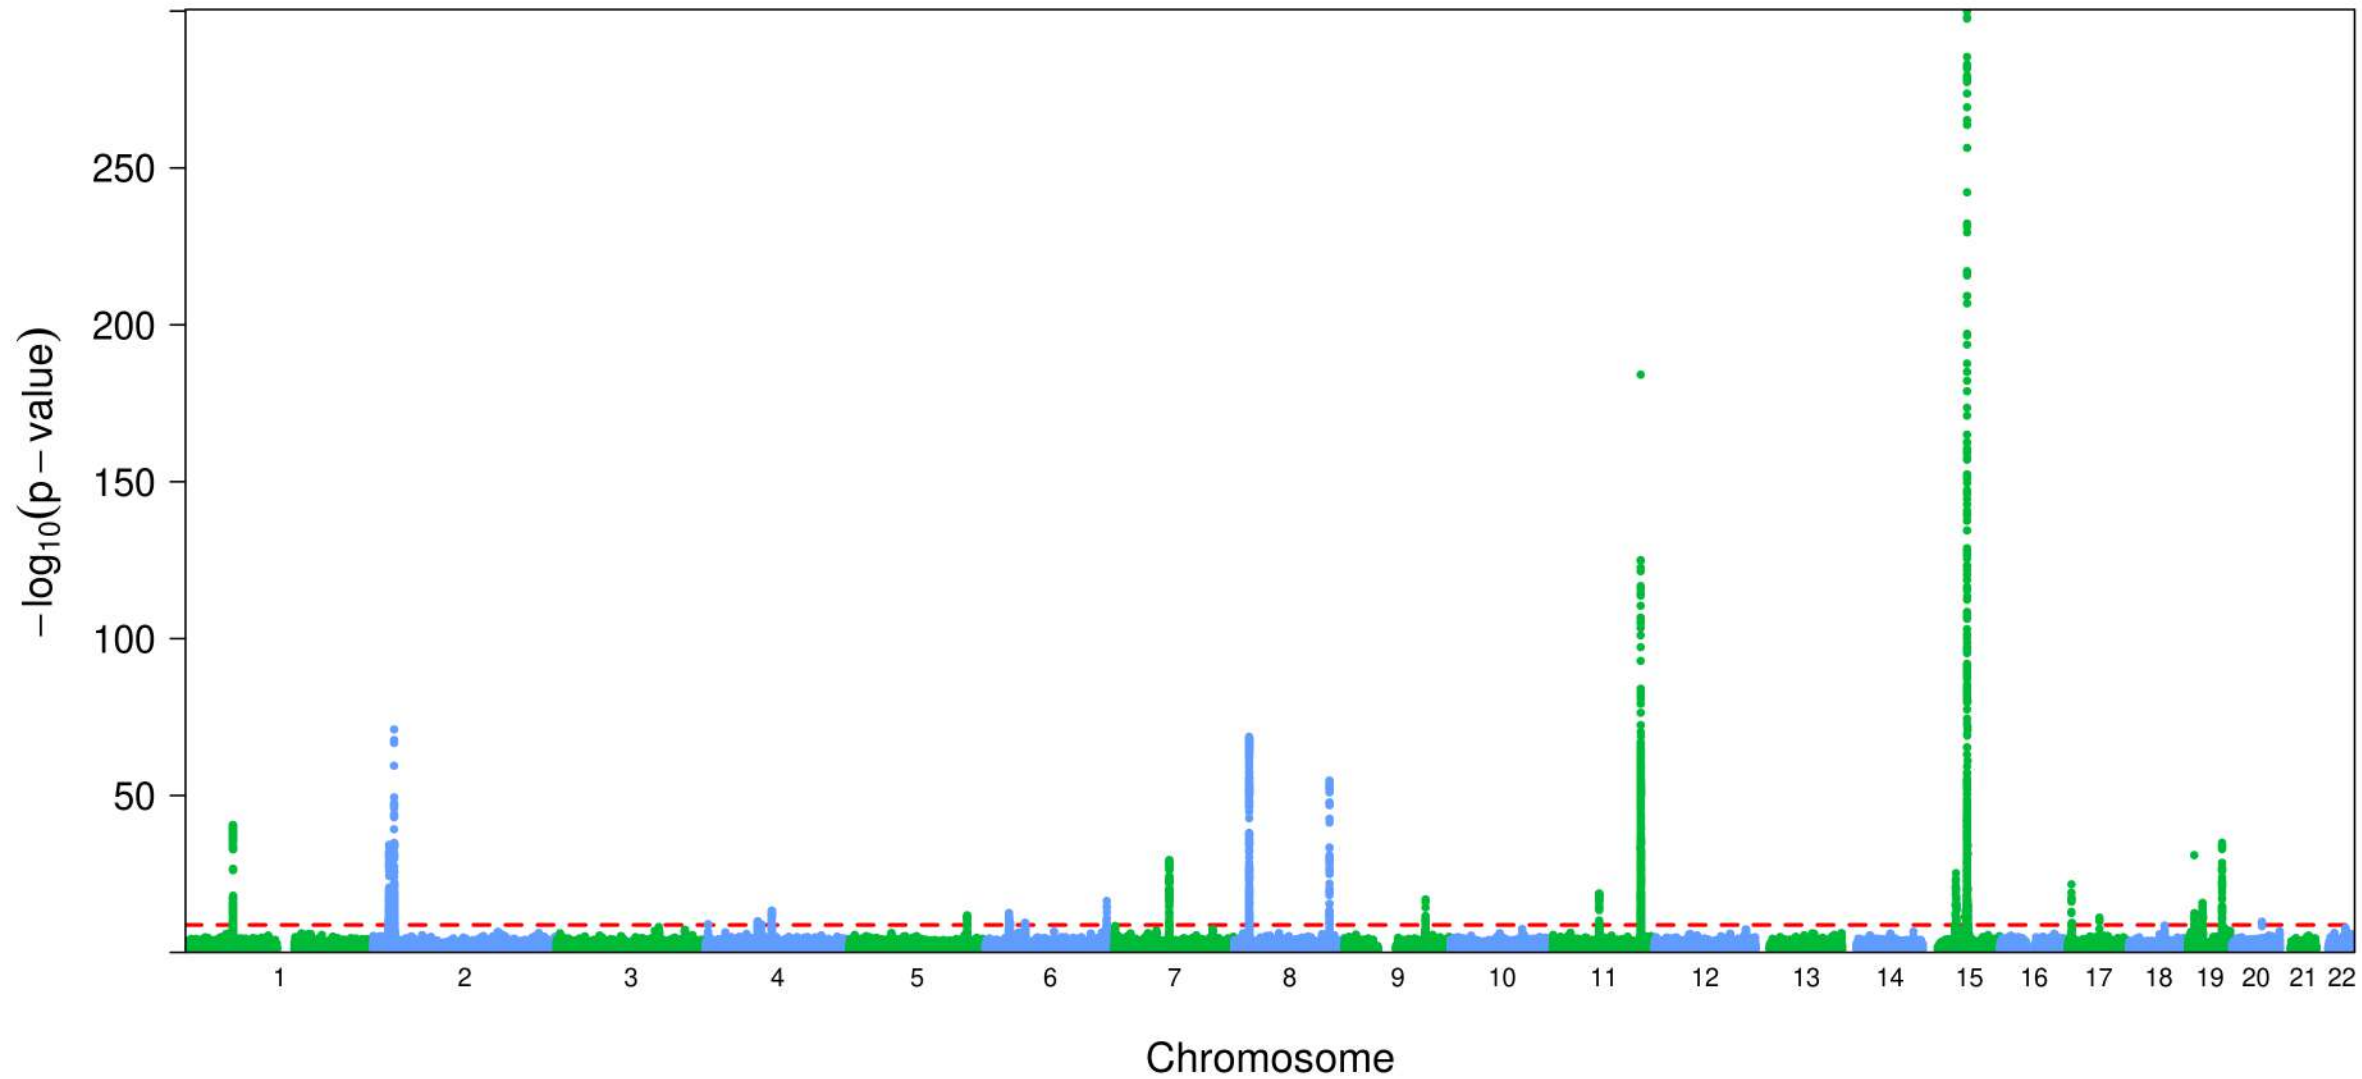



# M-VLDL-L

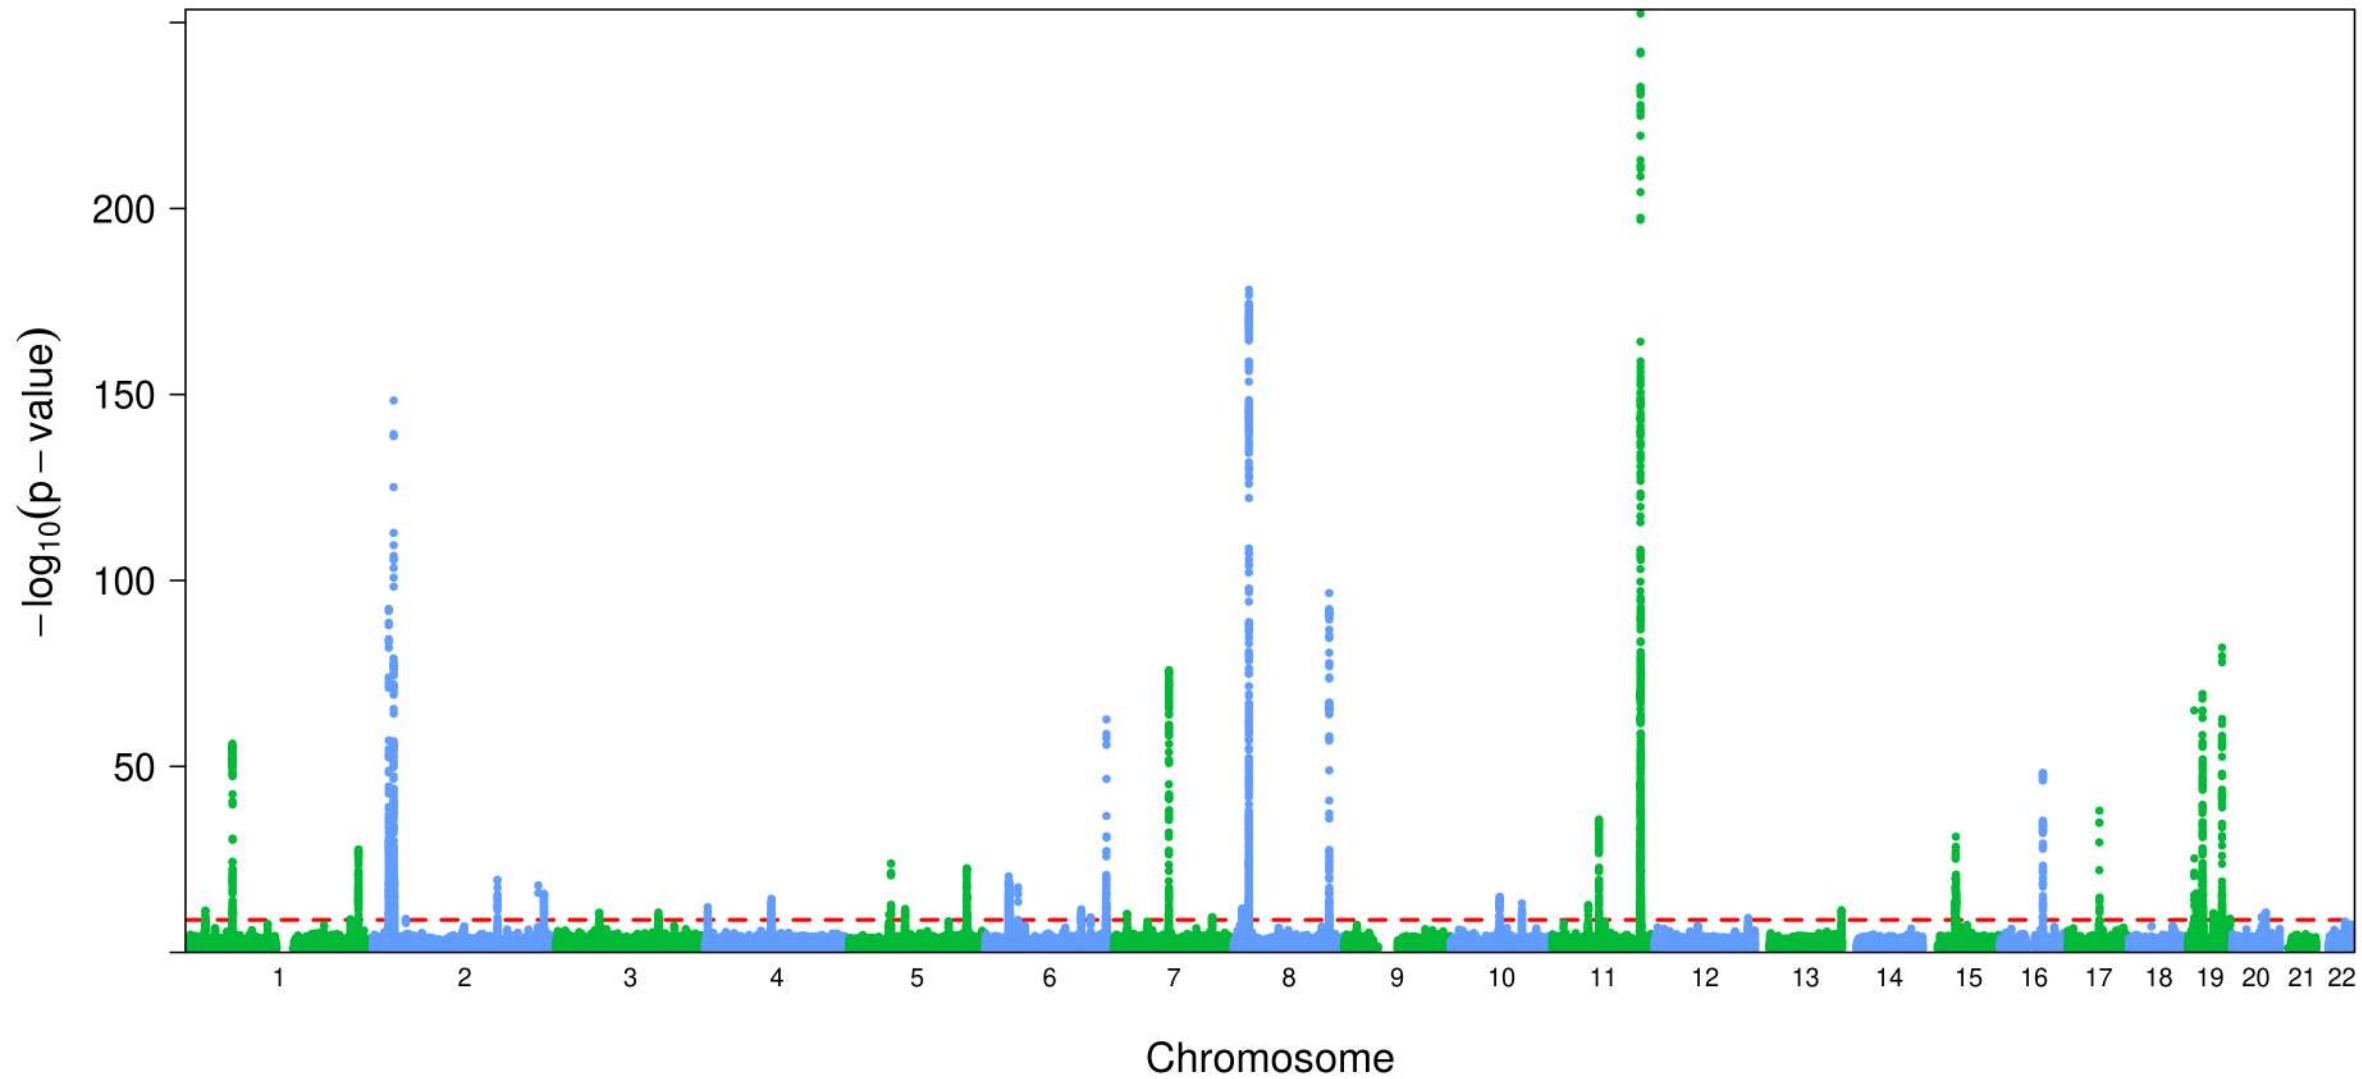

# M-VLDL-P

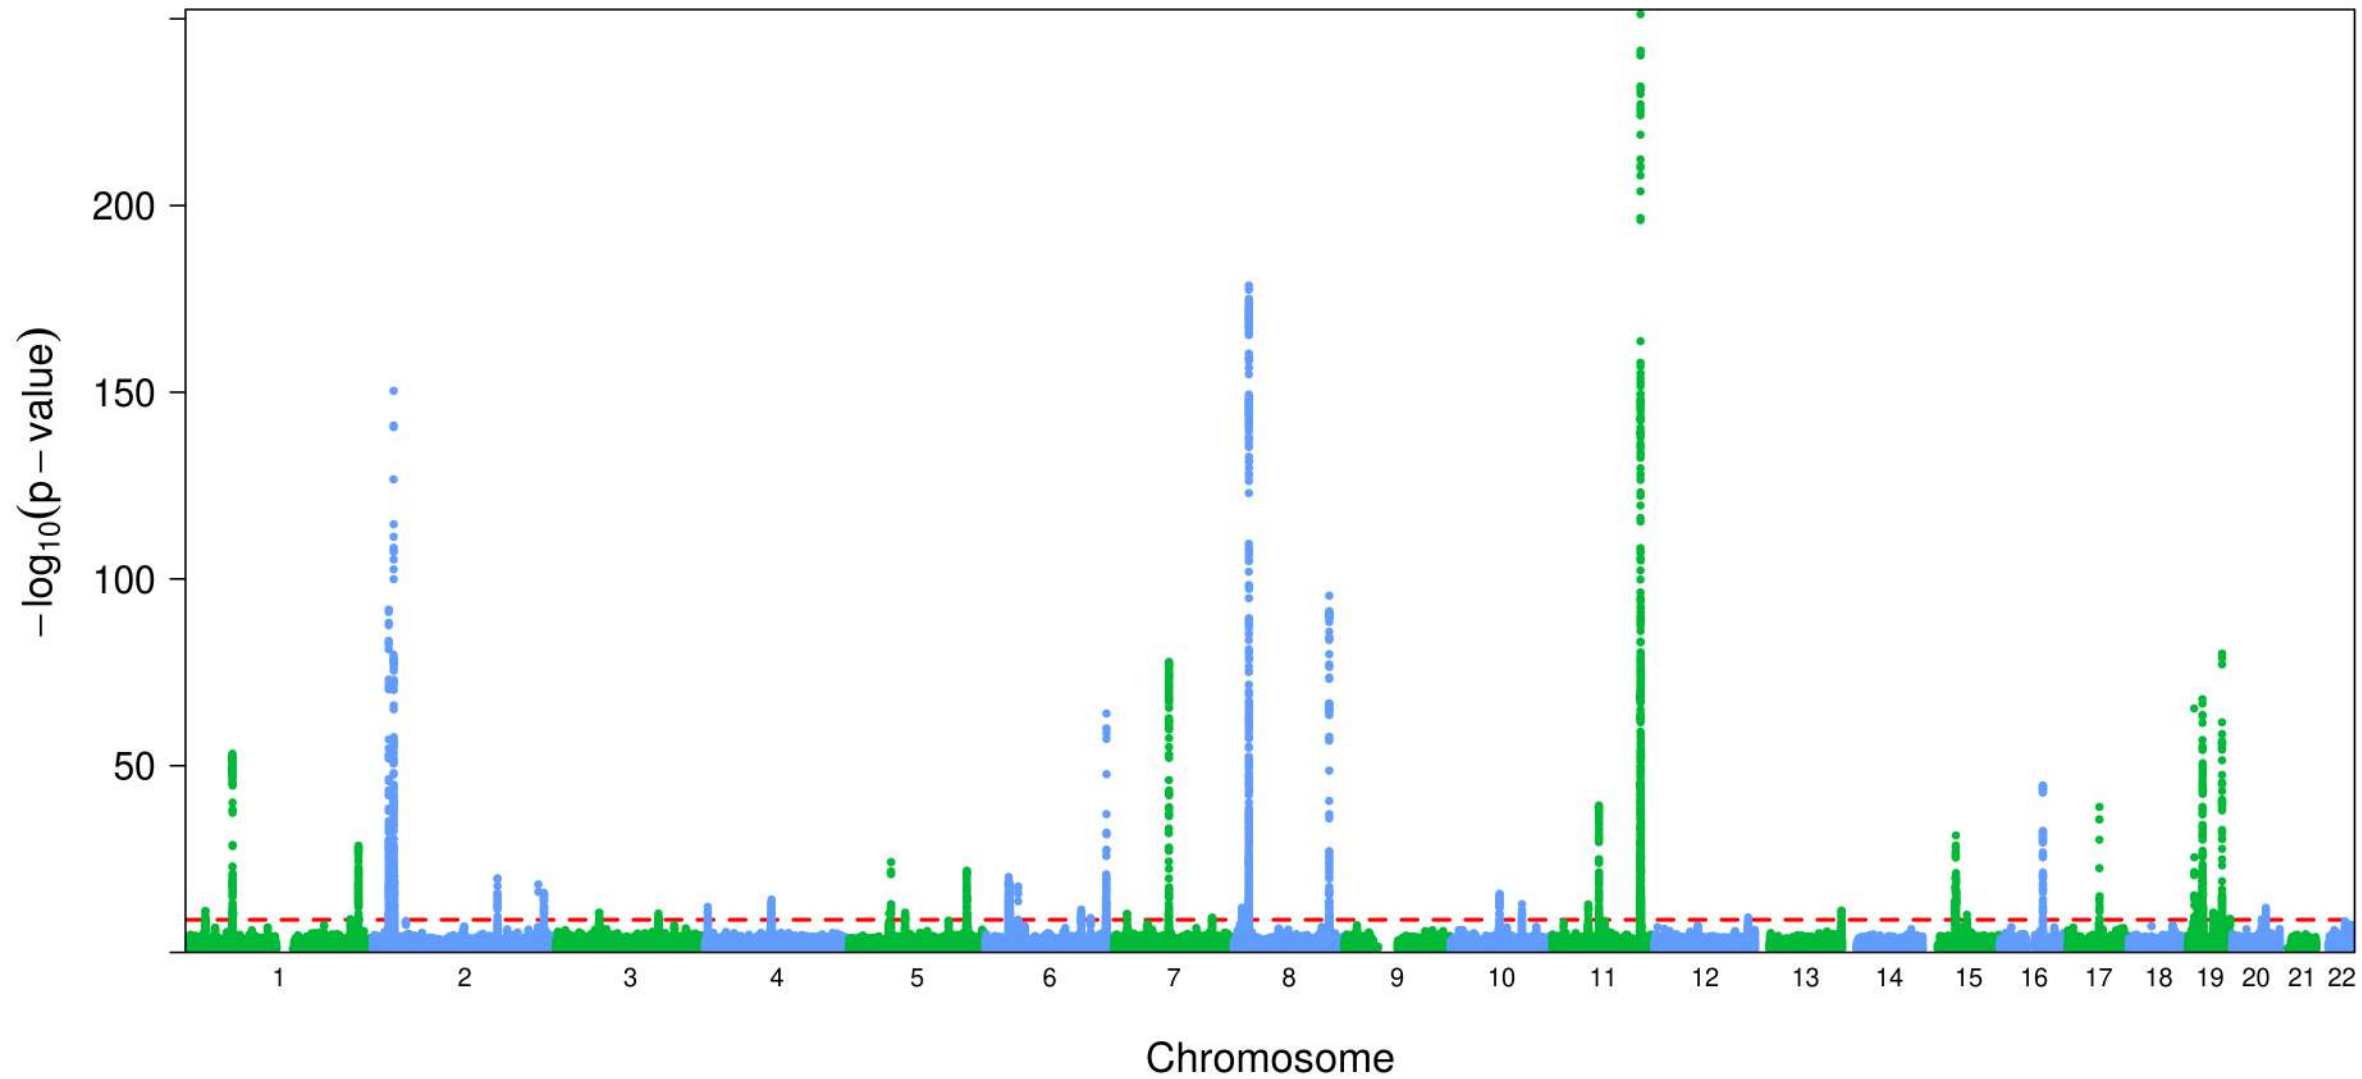

# M-VLDDL-PL

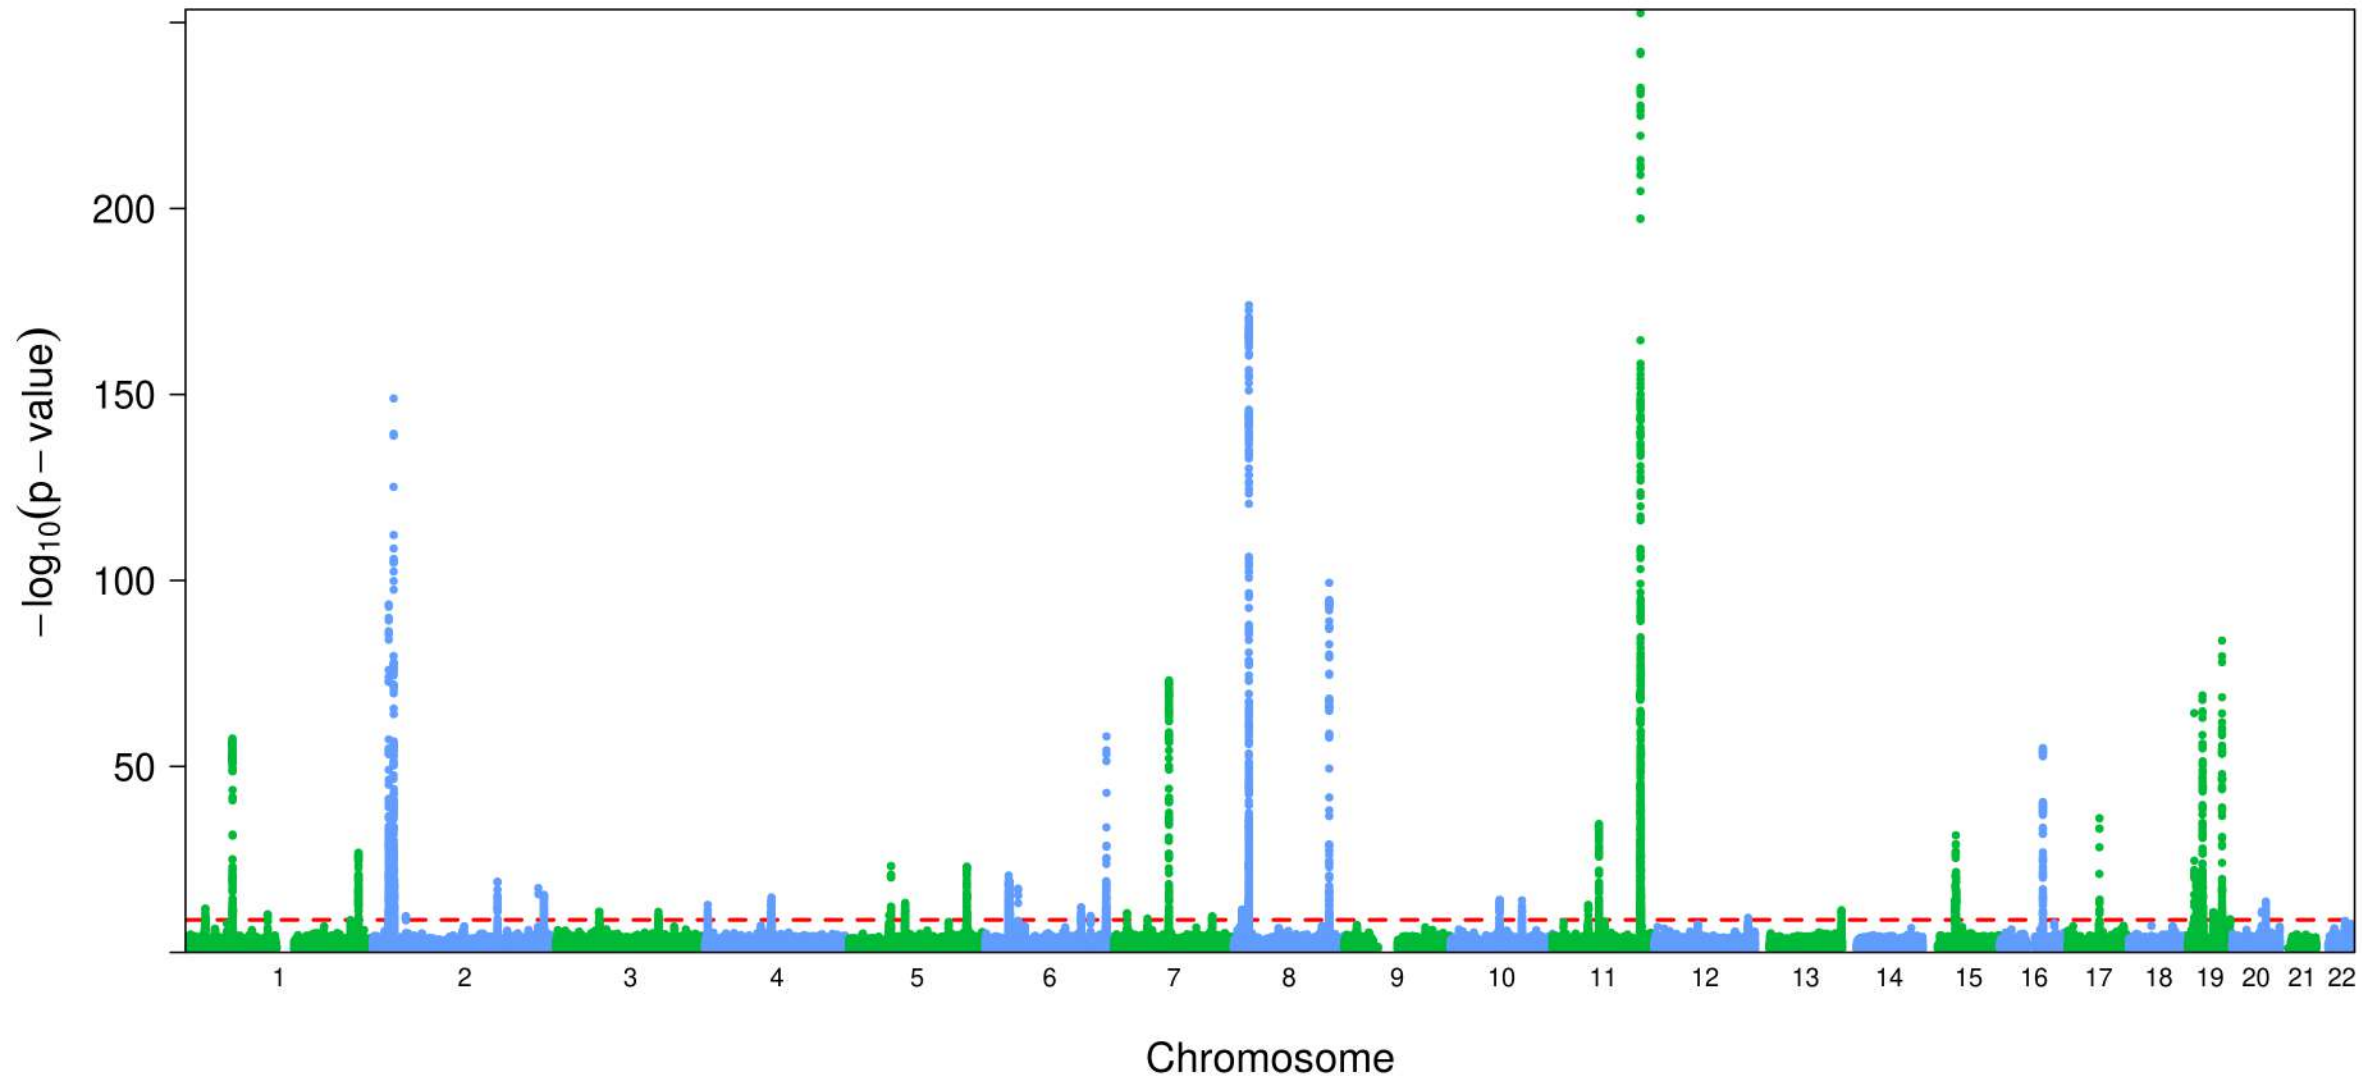

# M-VLDL-PL\_percent

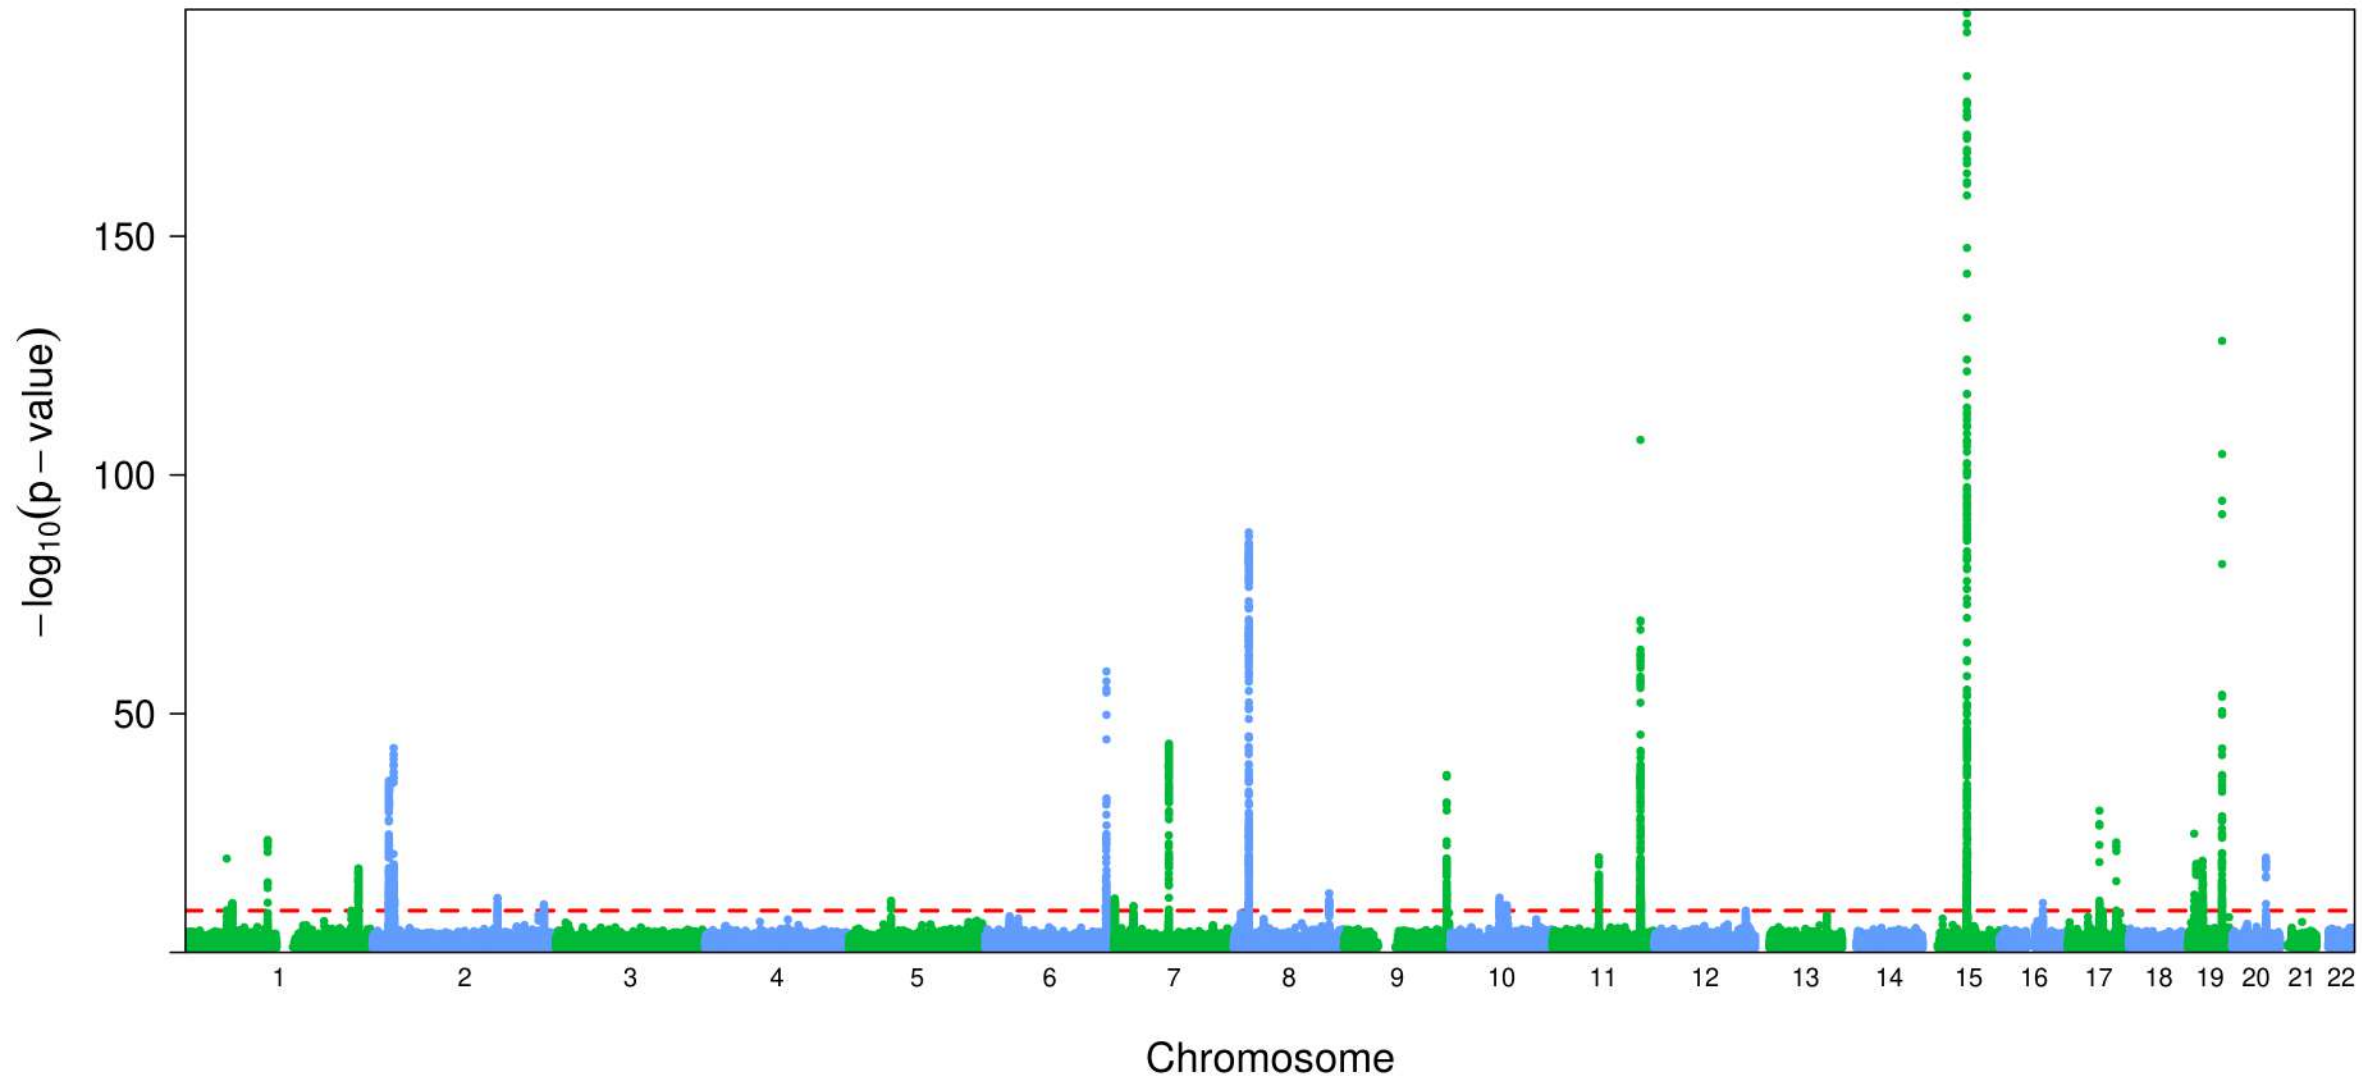

# M-VLTL-TG

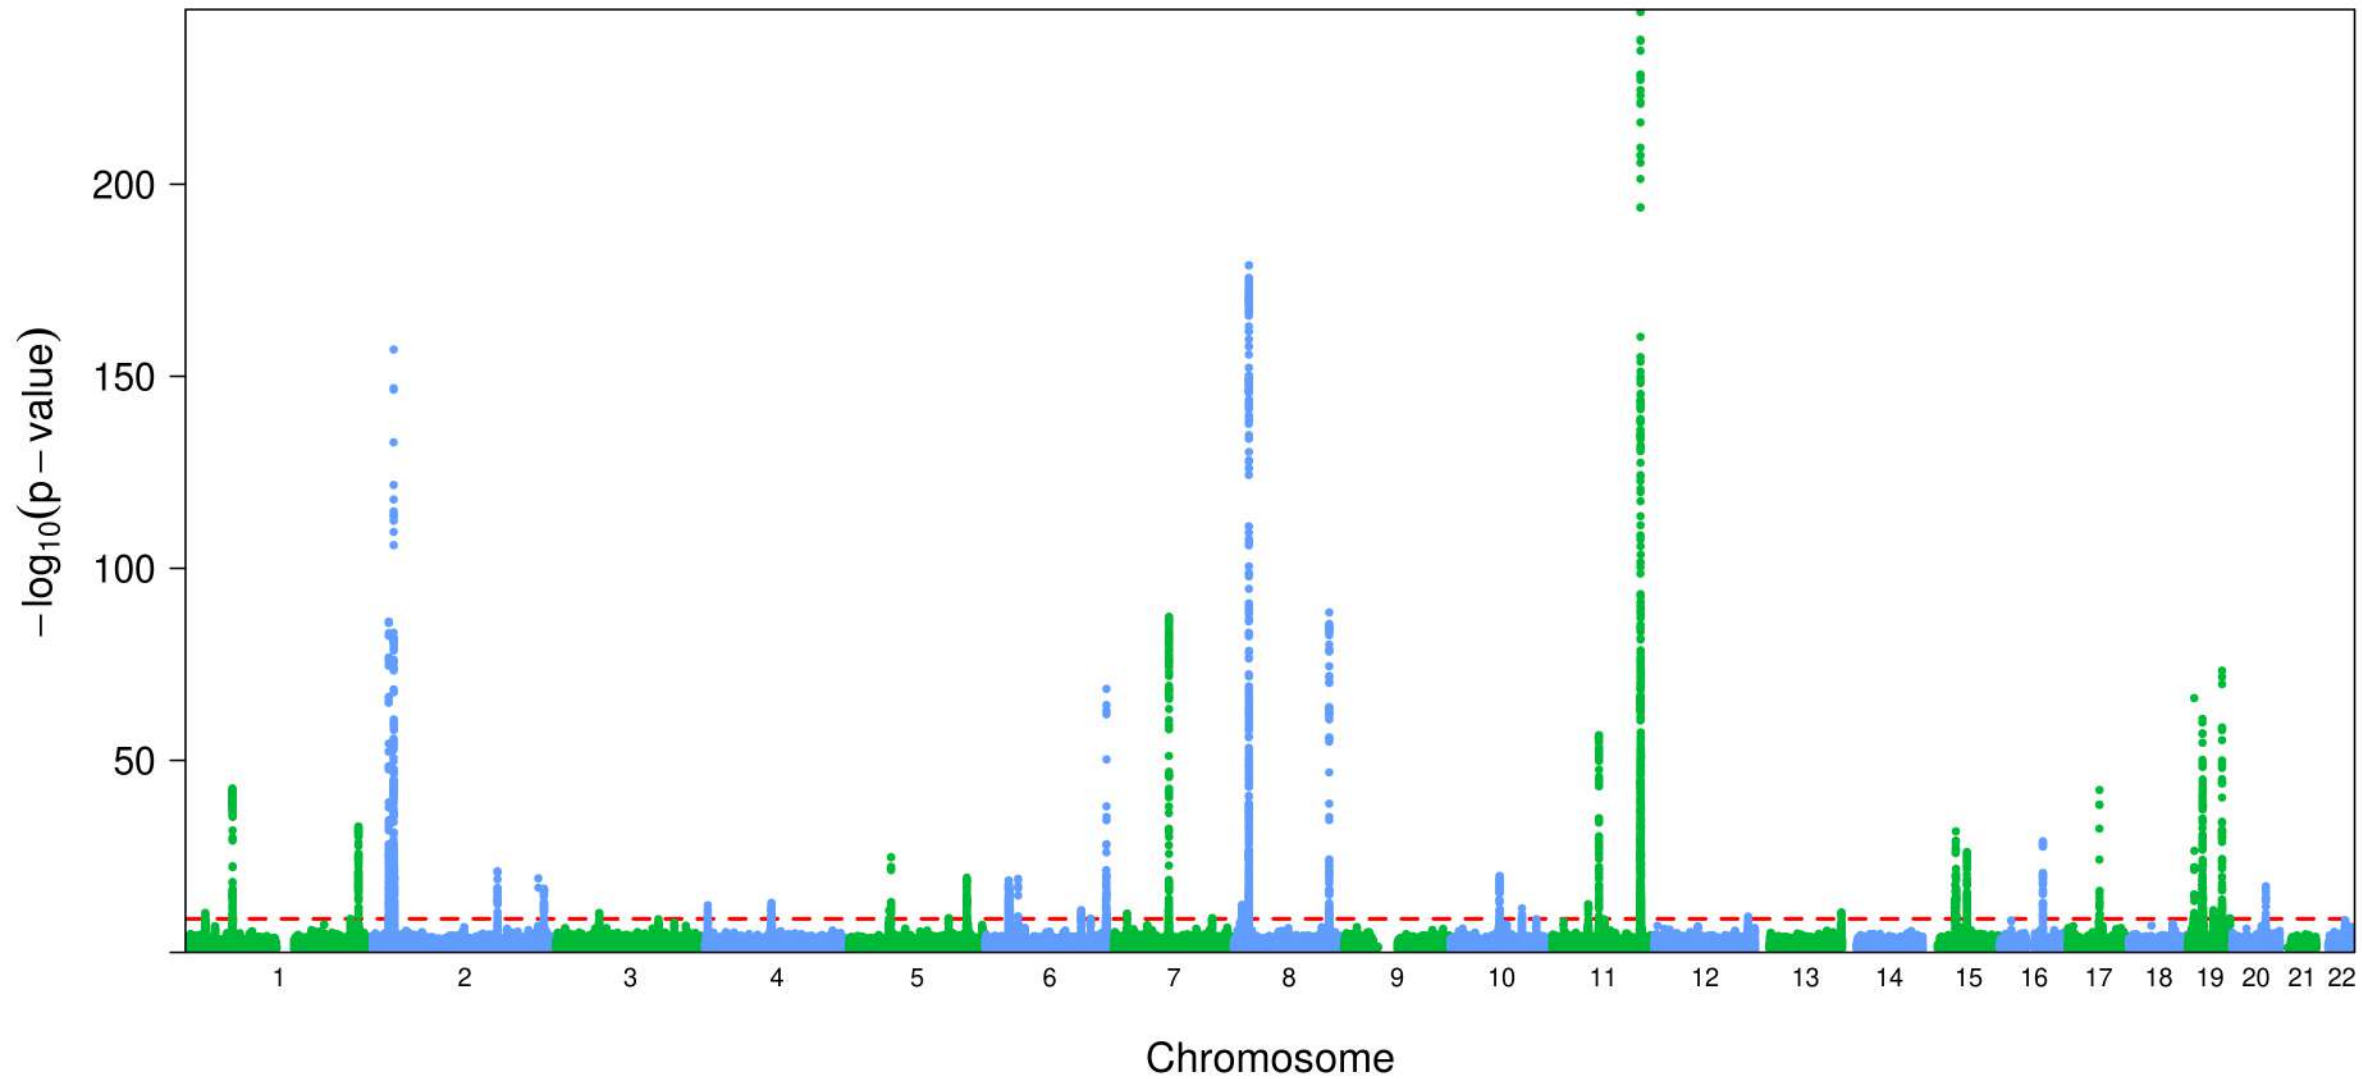

# M-VLDL-TG\_percent

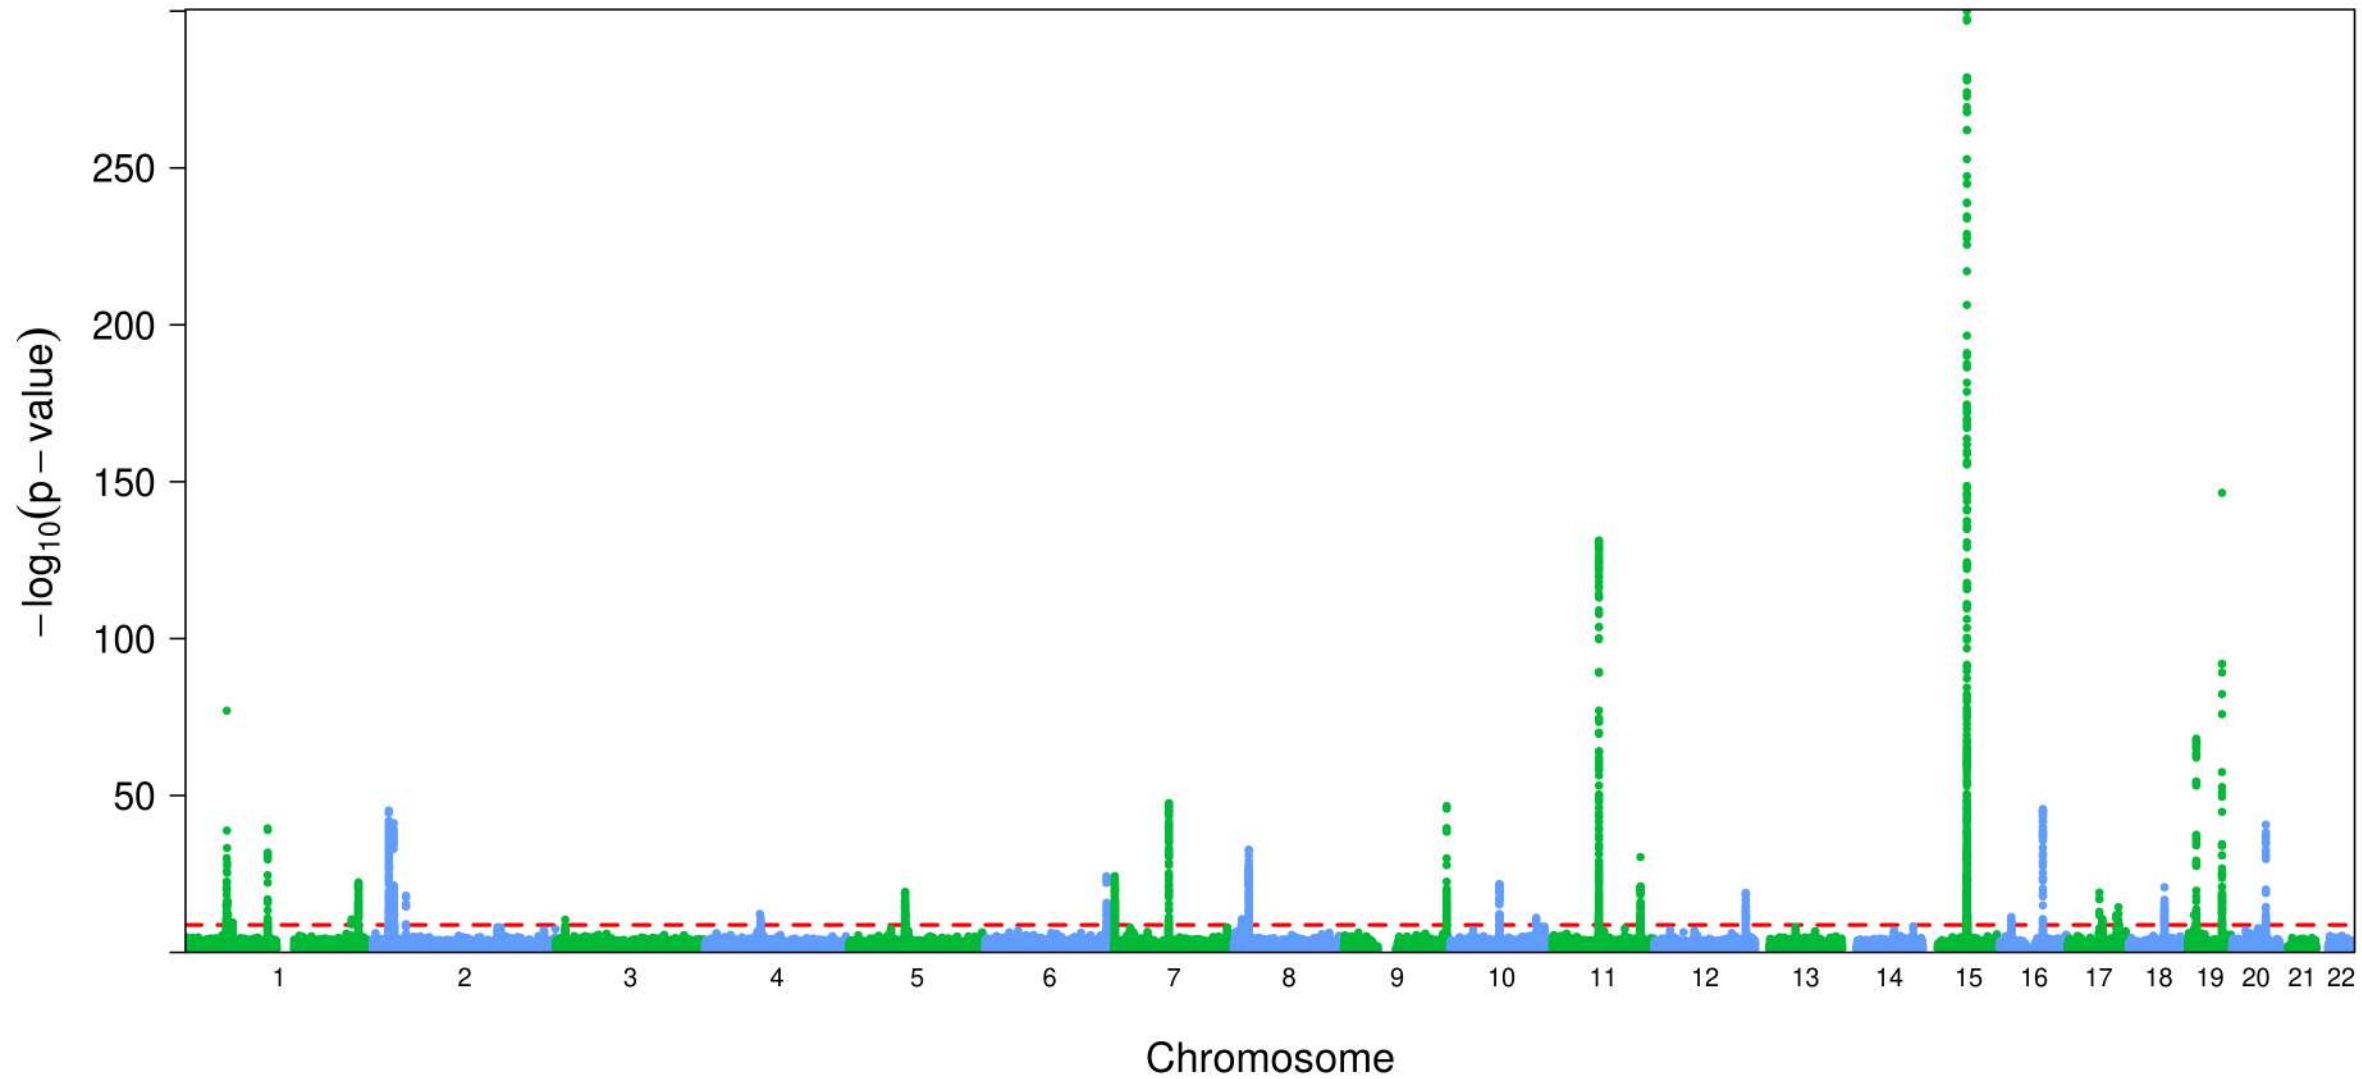

# MUFA

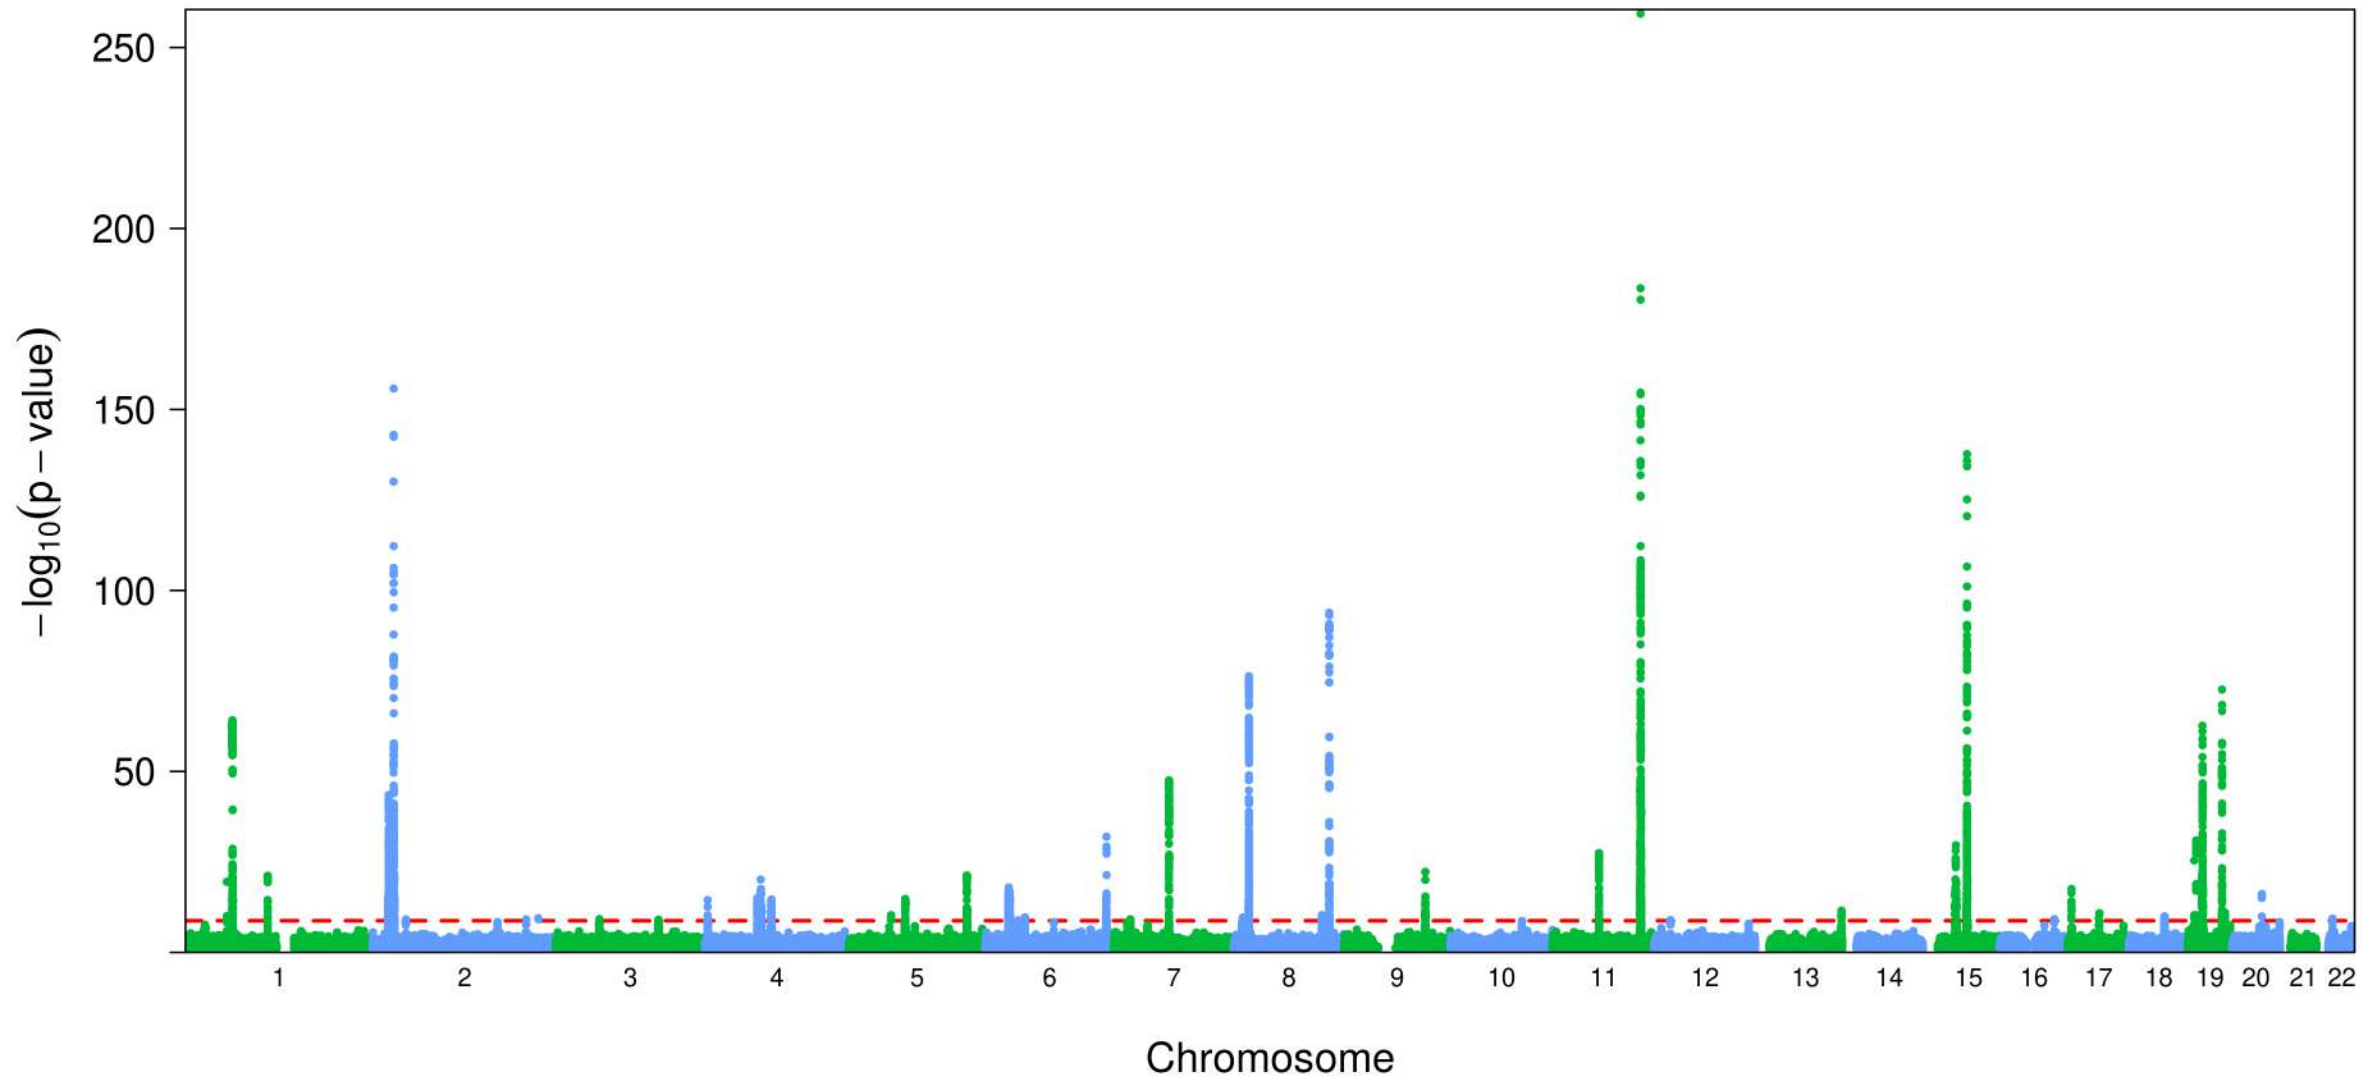

# MUFAbyFA

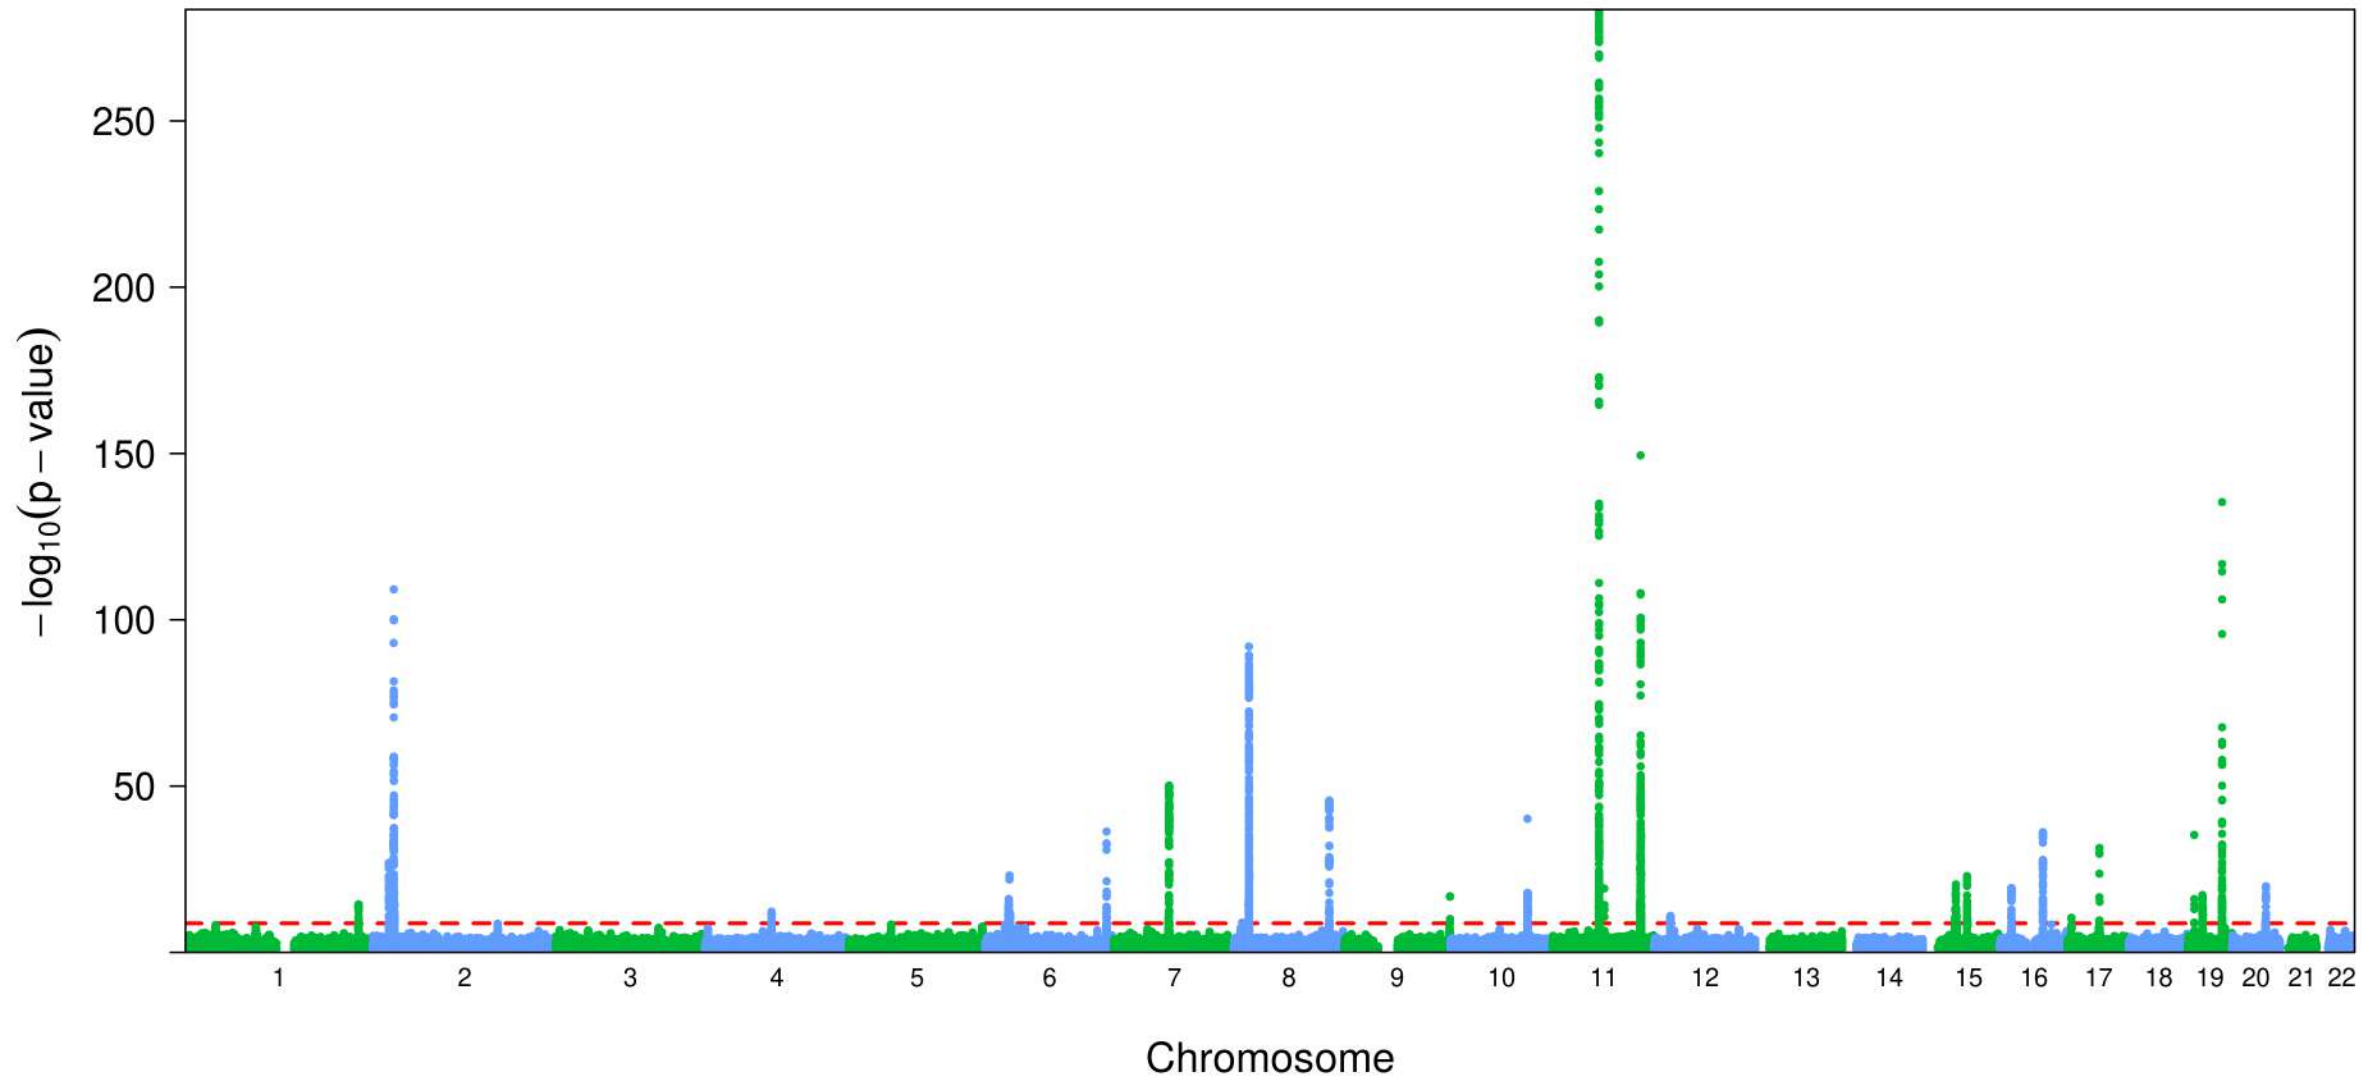



## PC

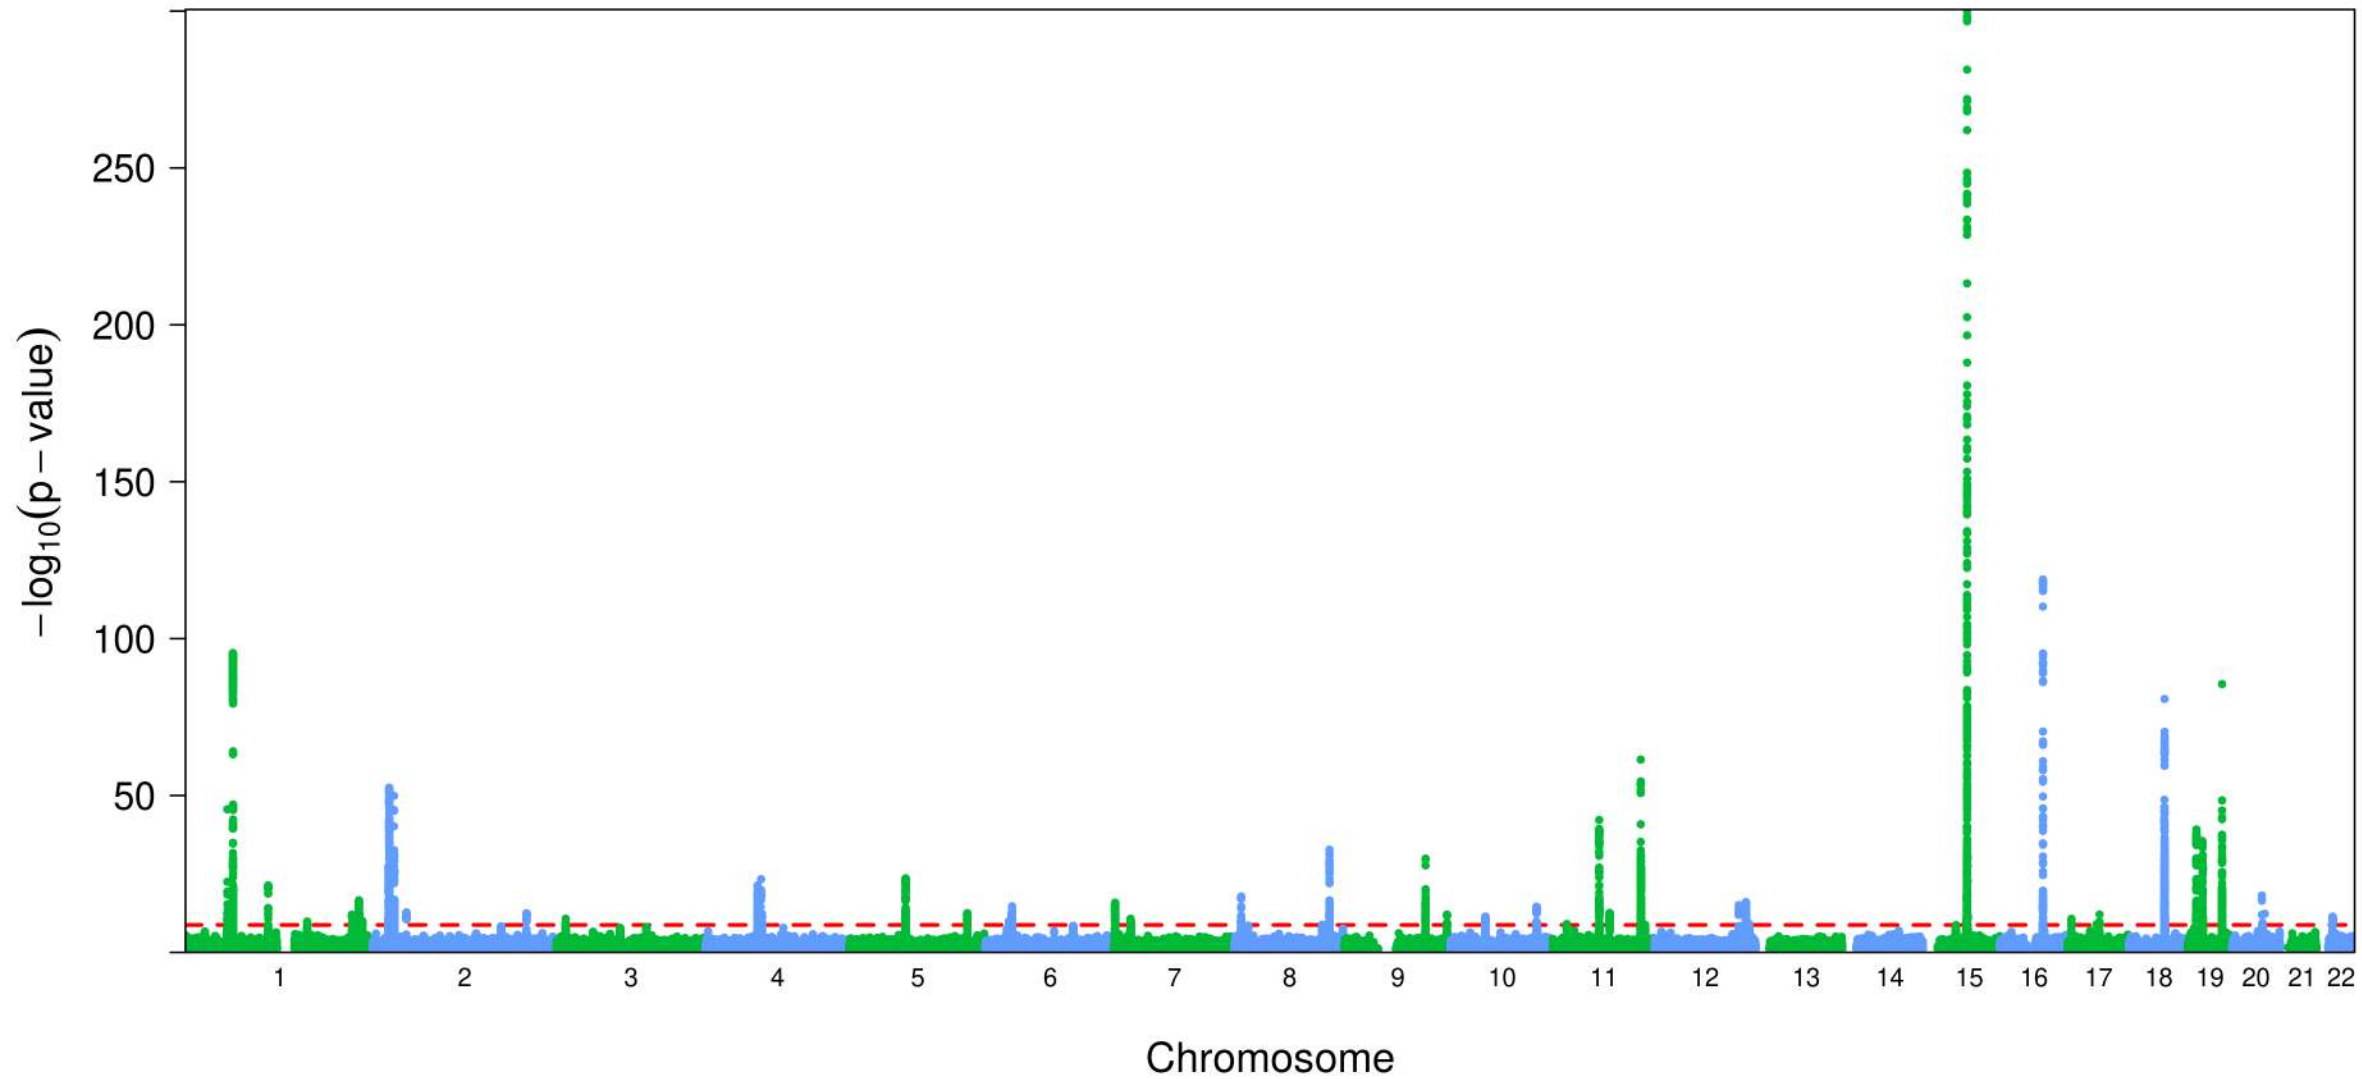

# Phe

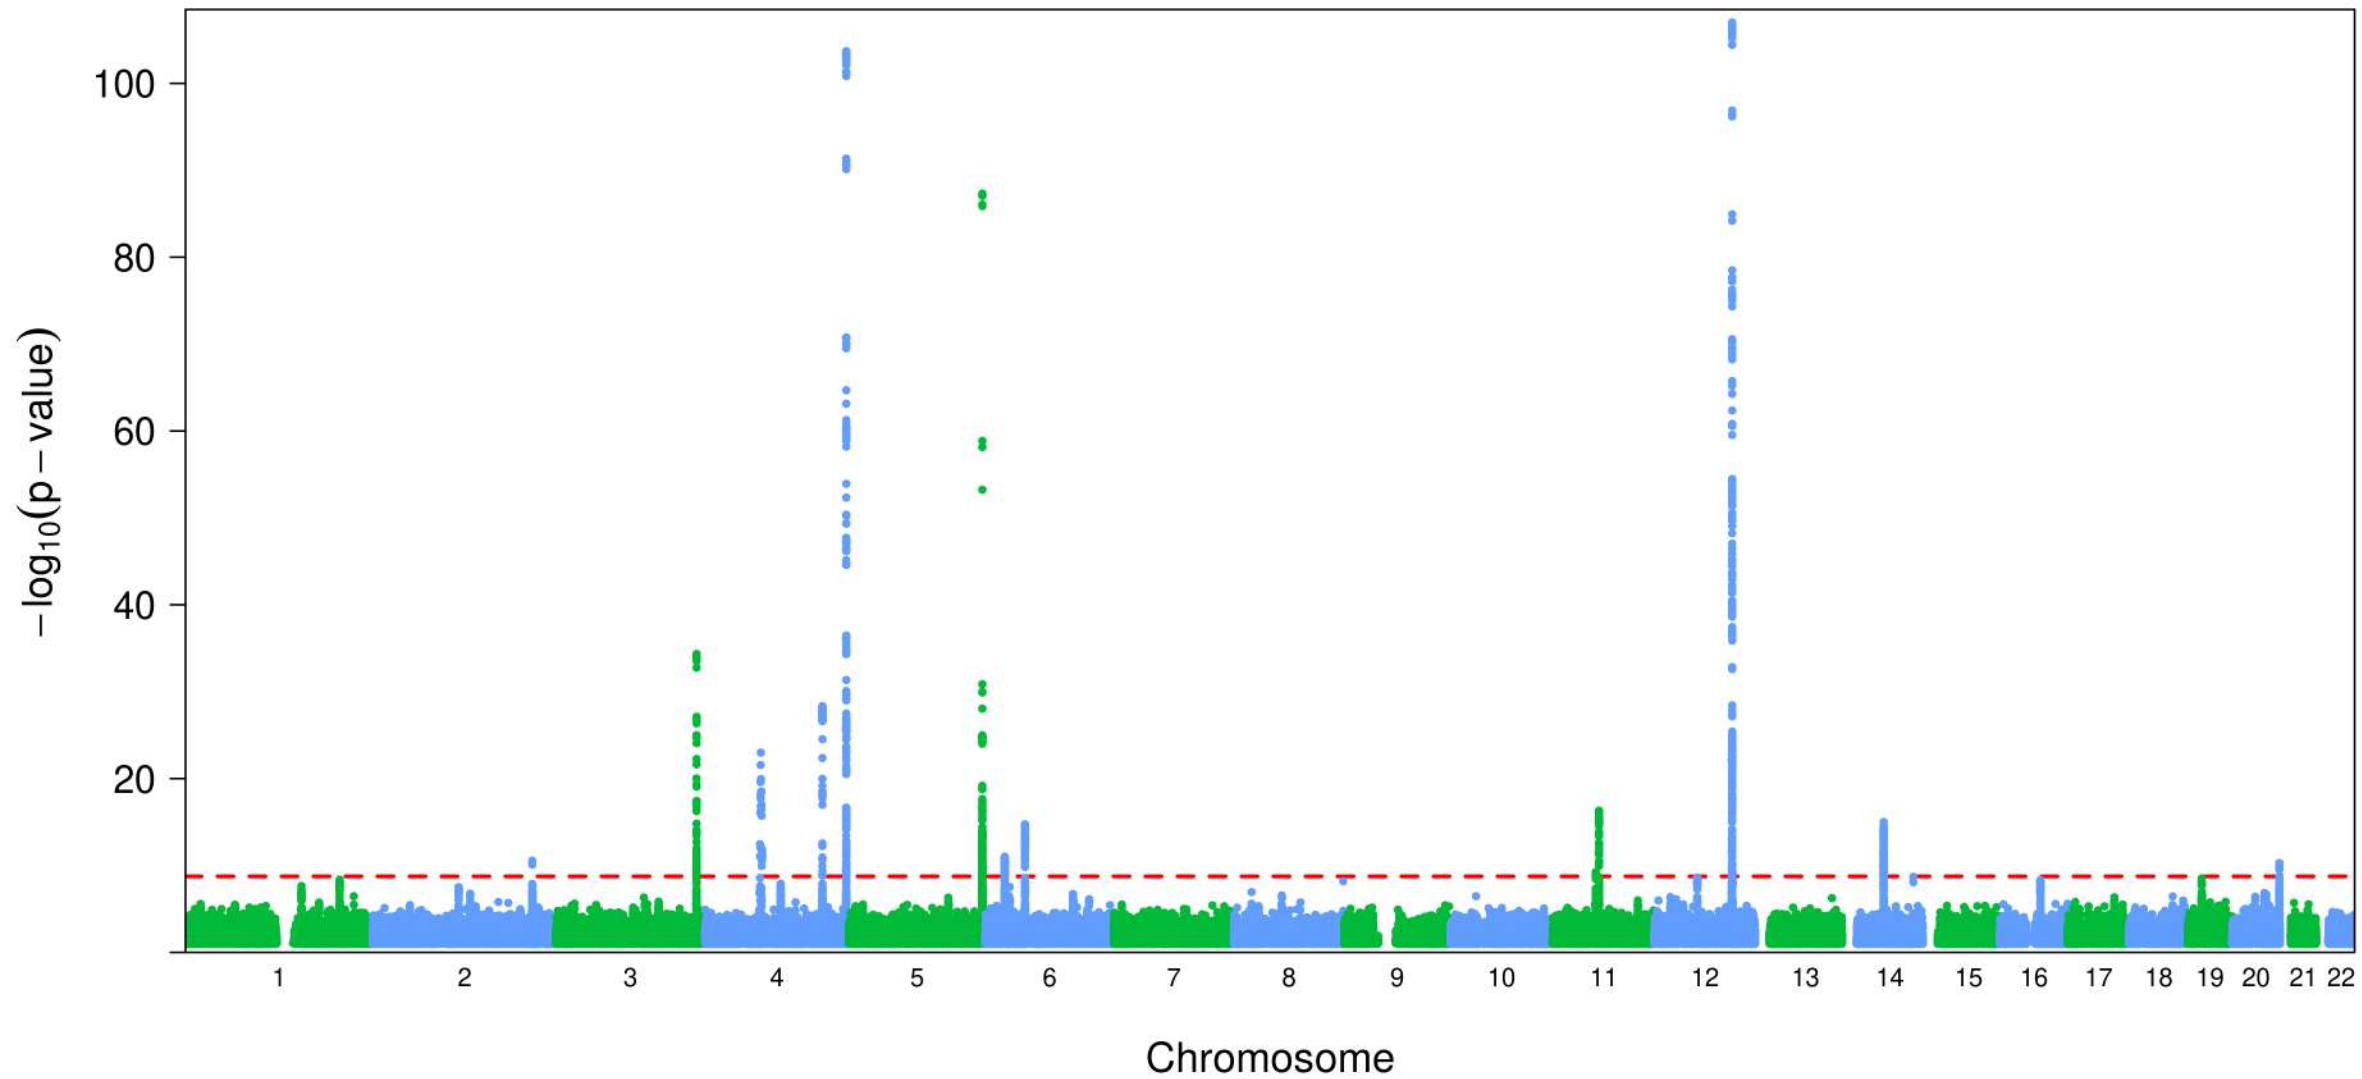

# PUFA

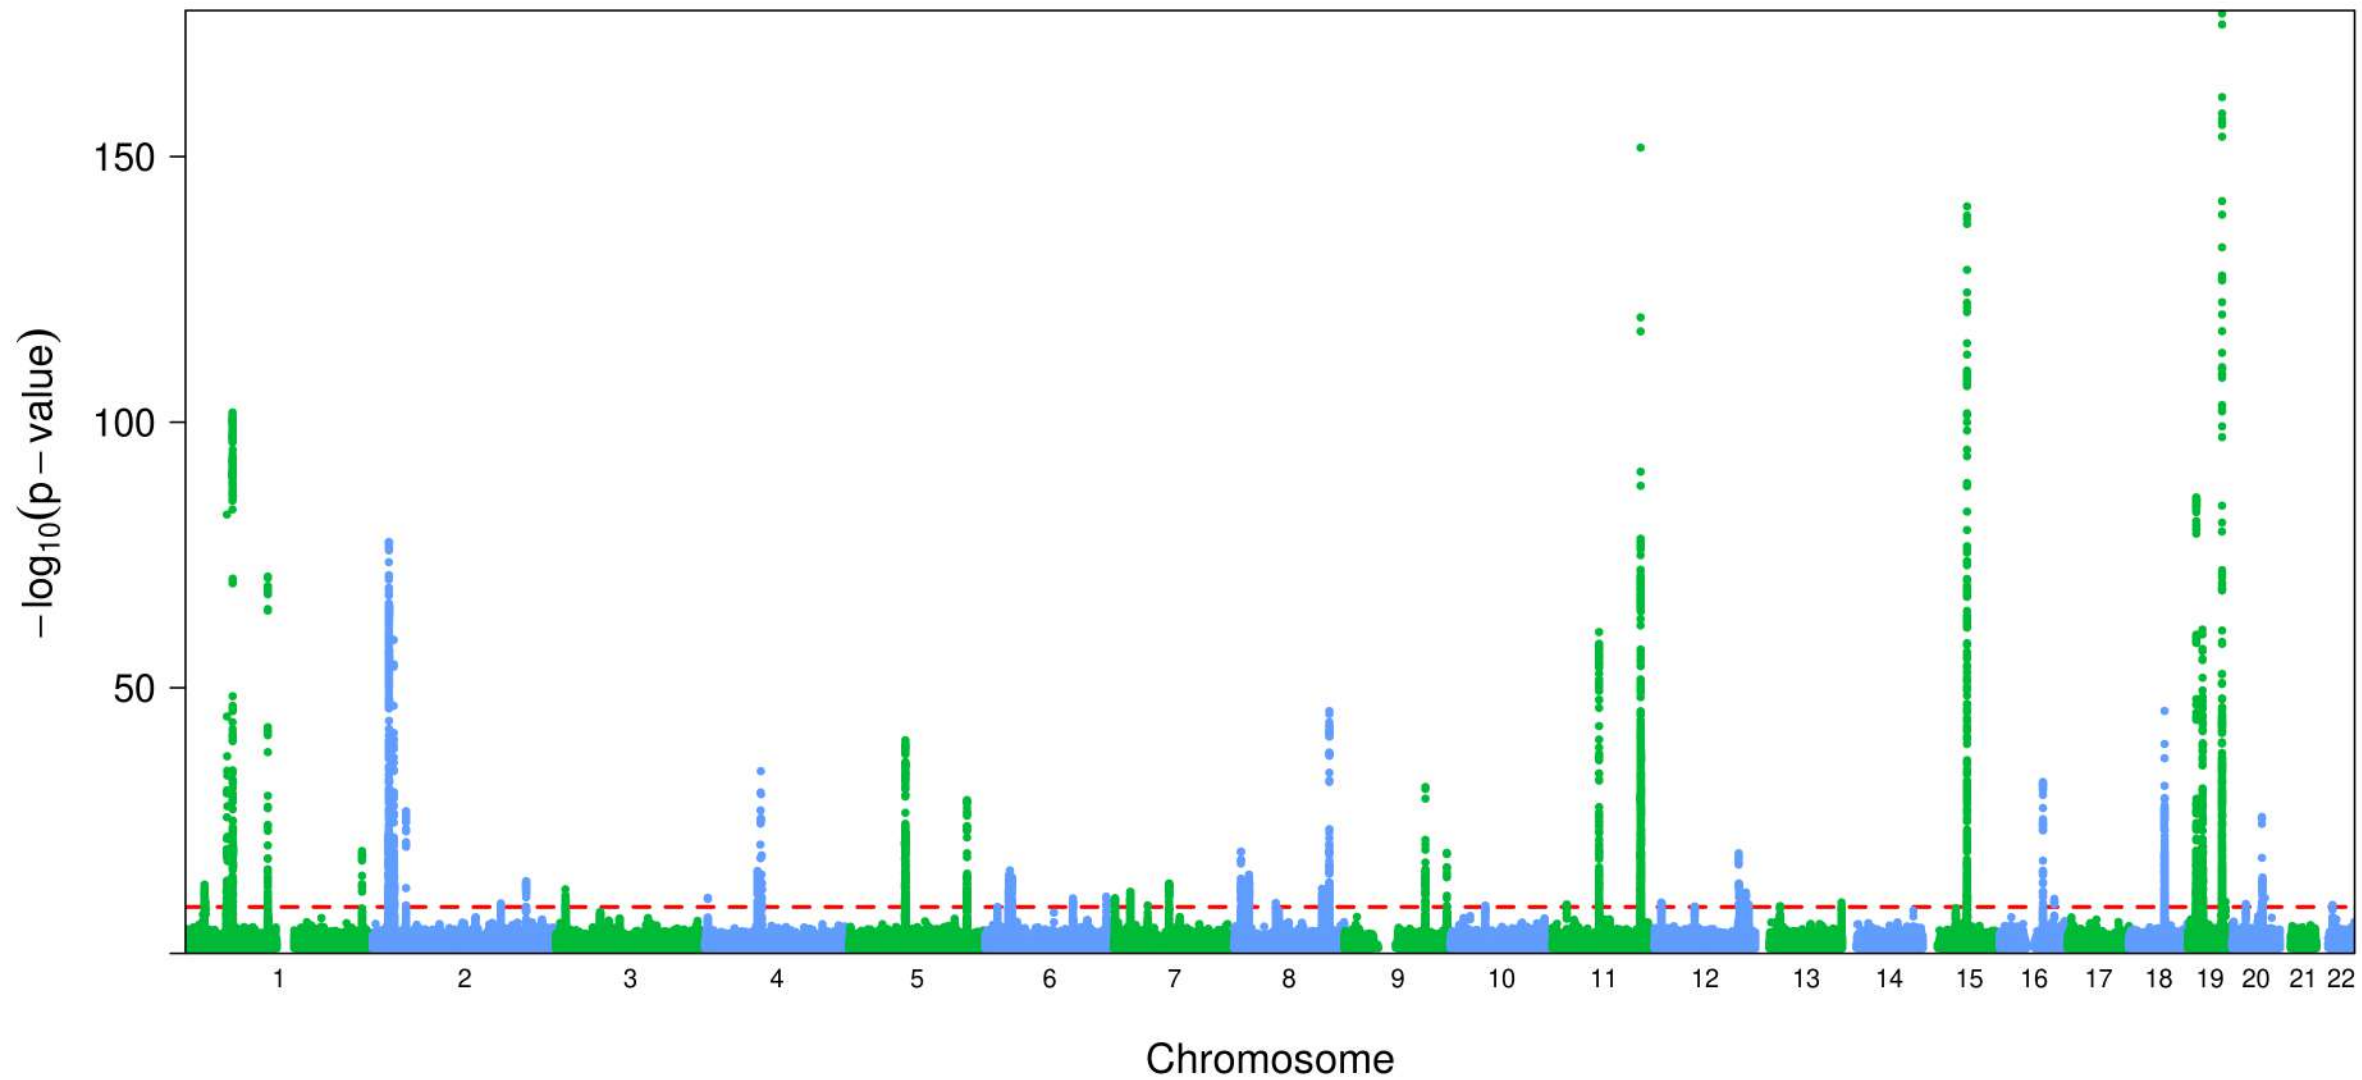

# PUFabyFA

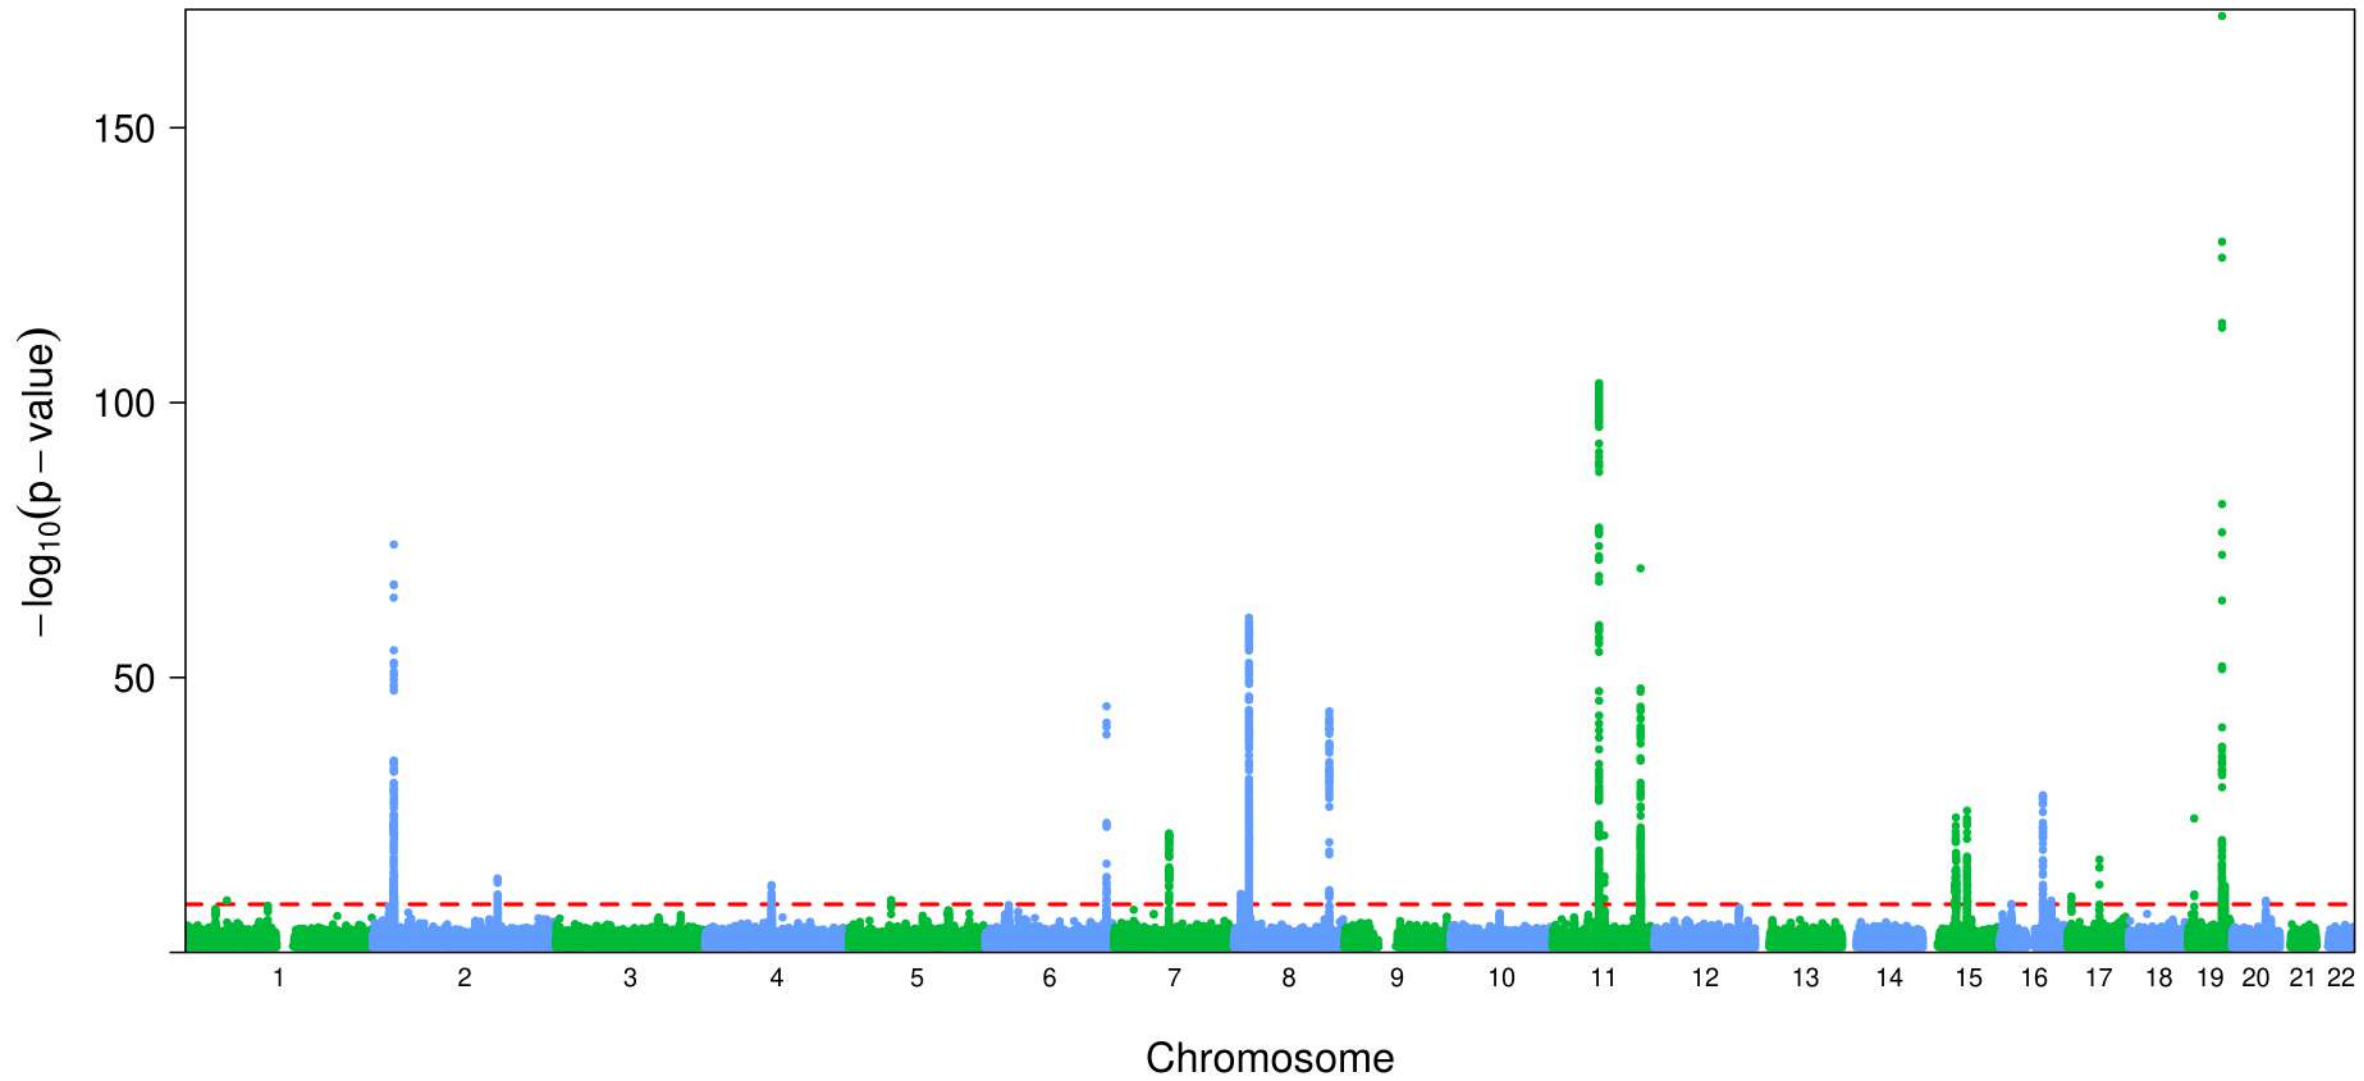

# Pyr

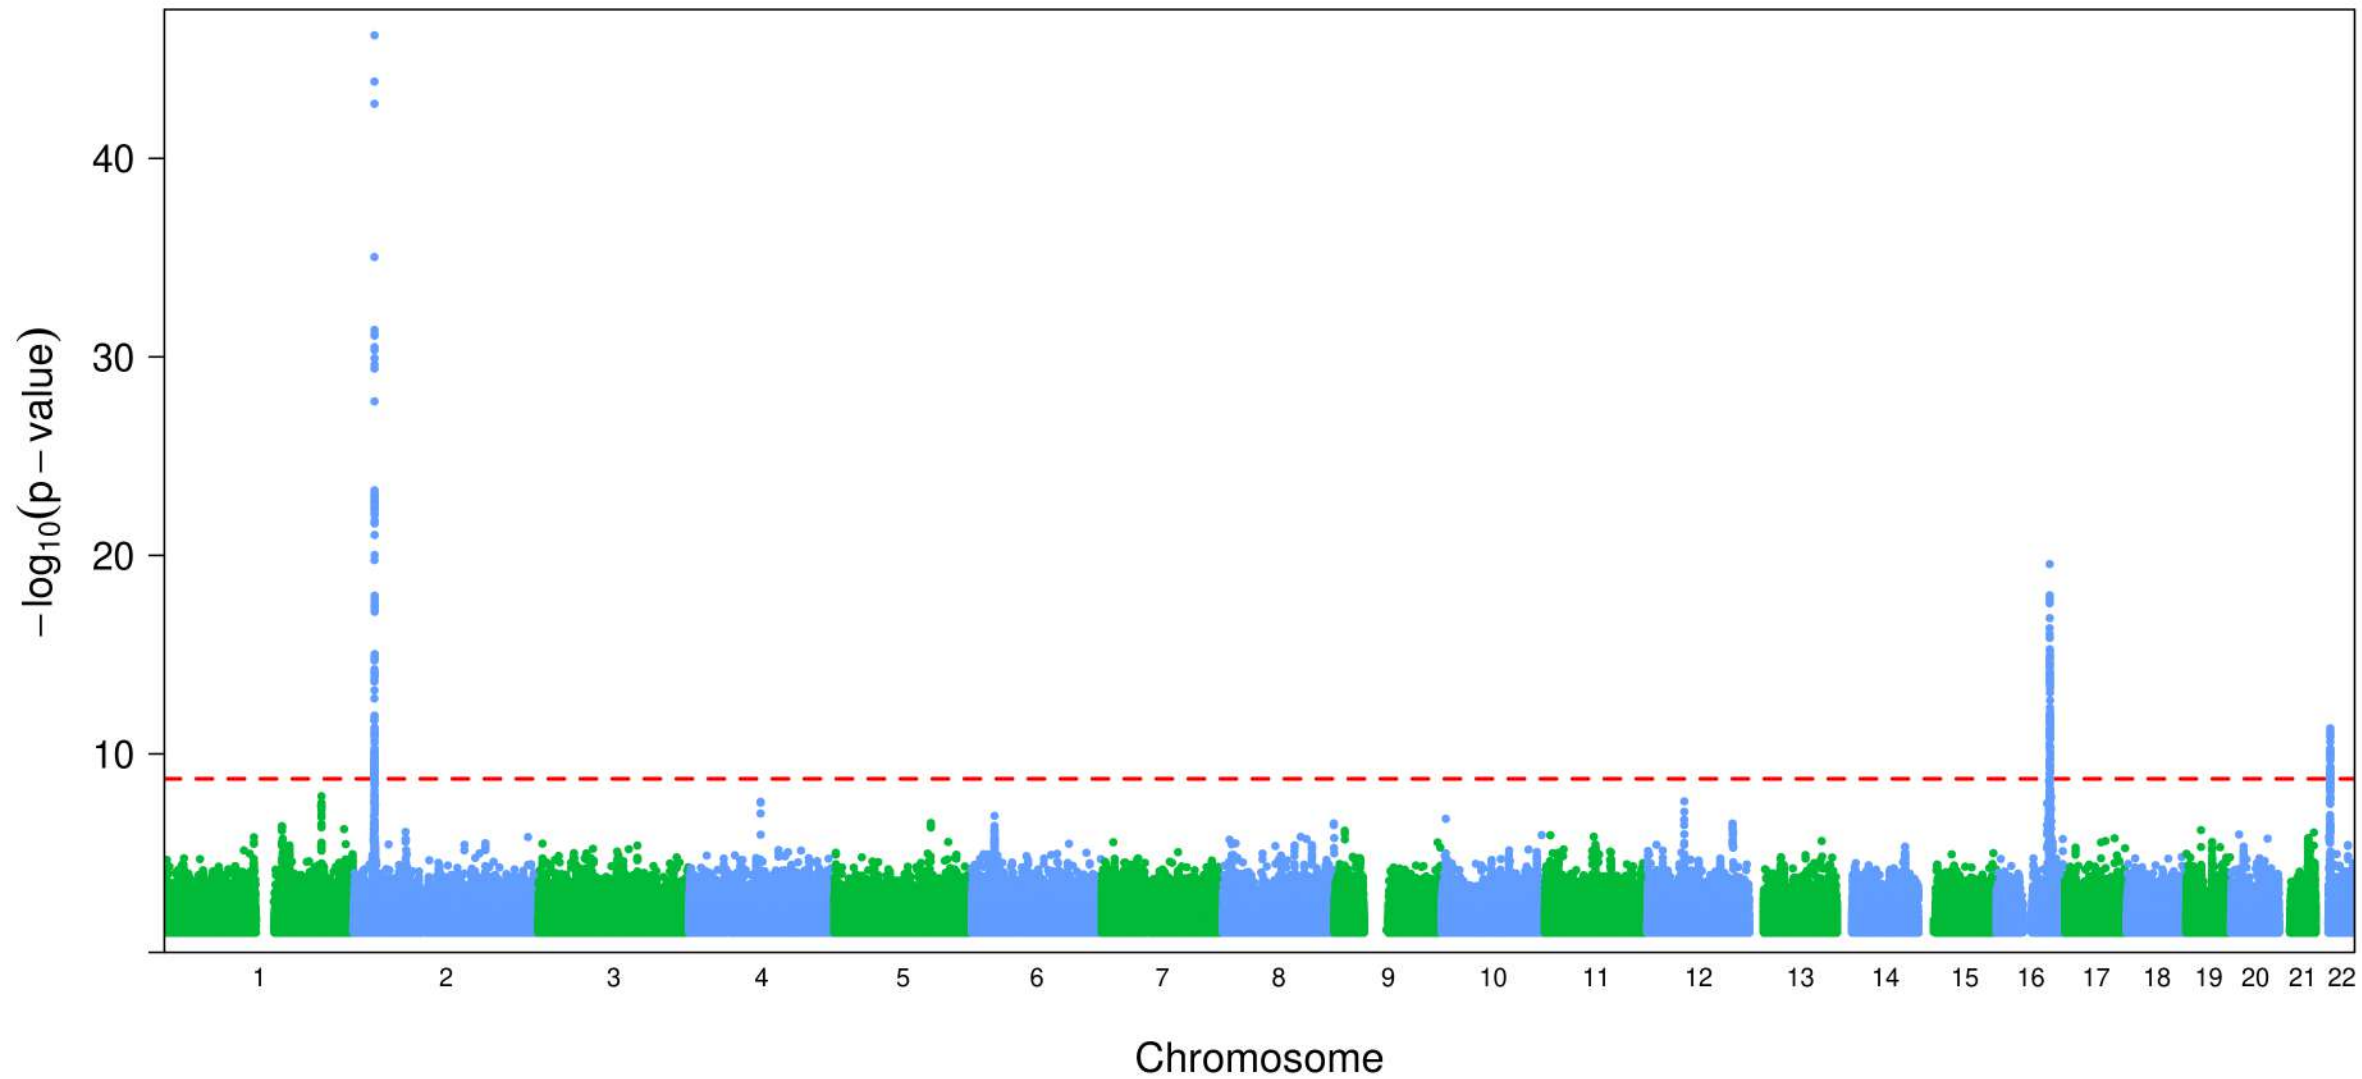

# Remnant-C

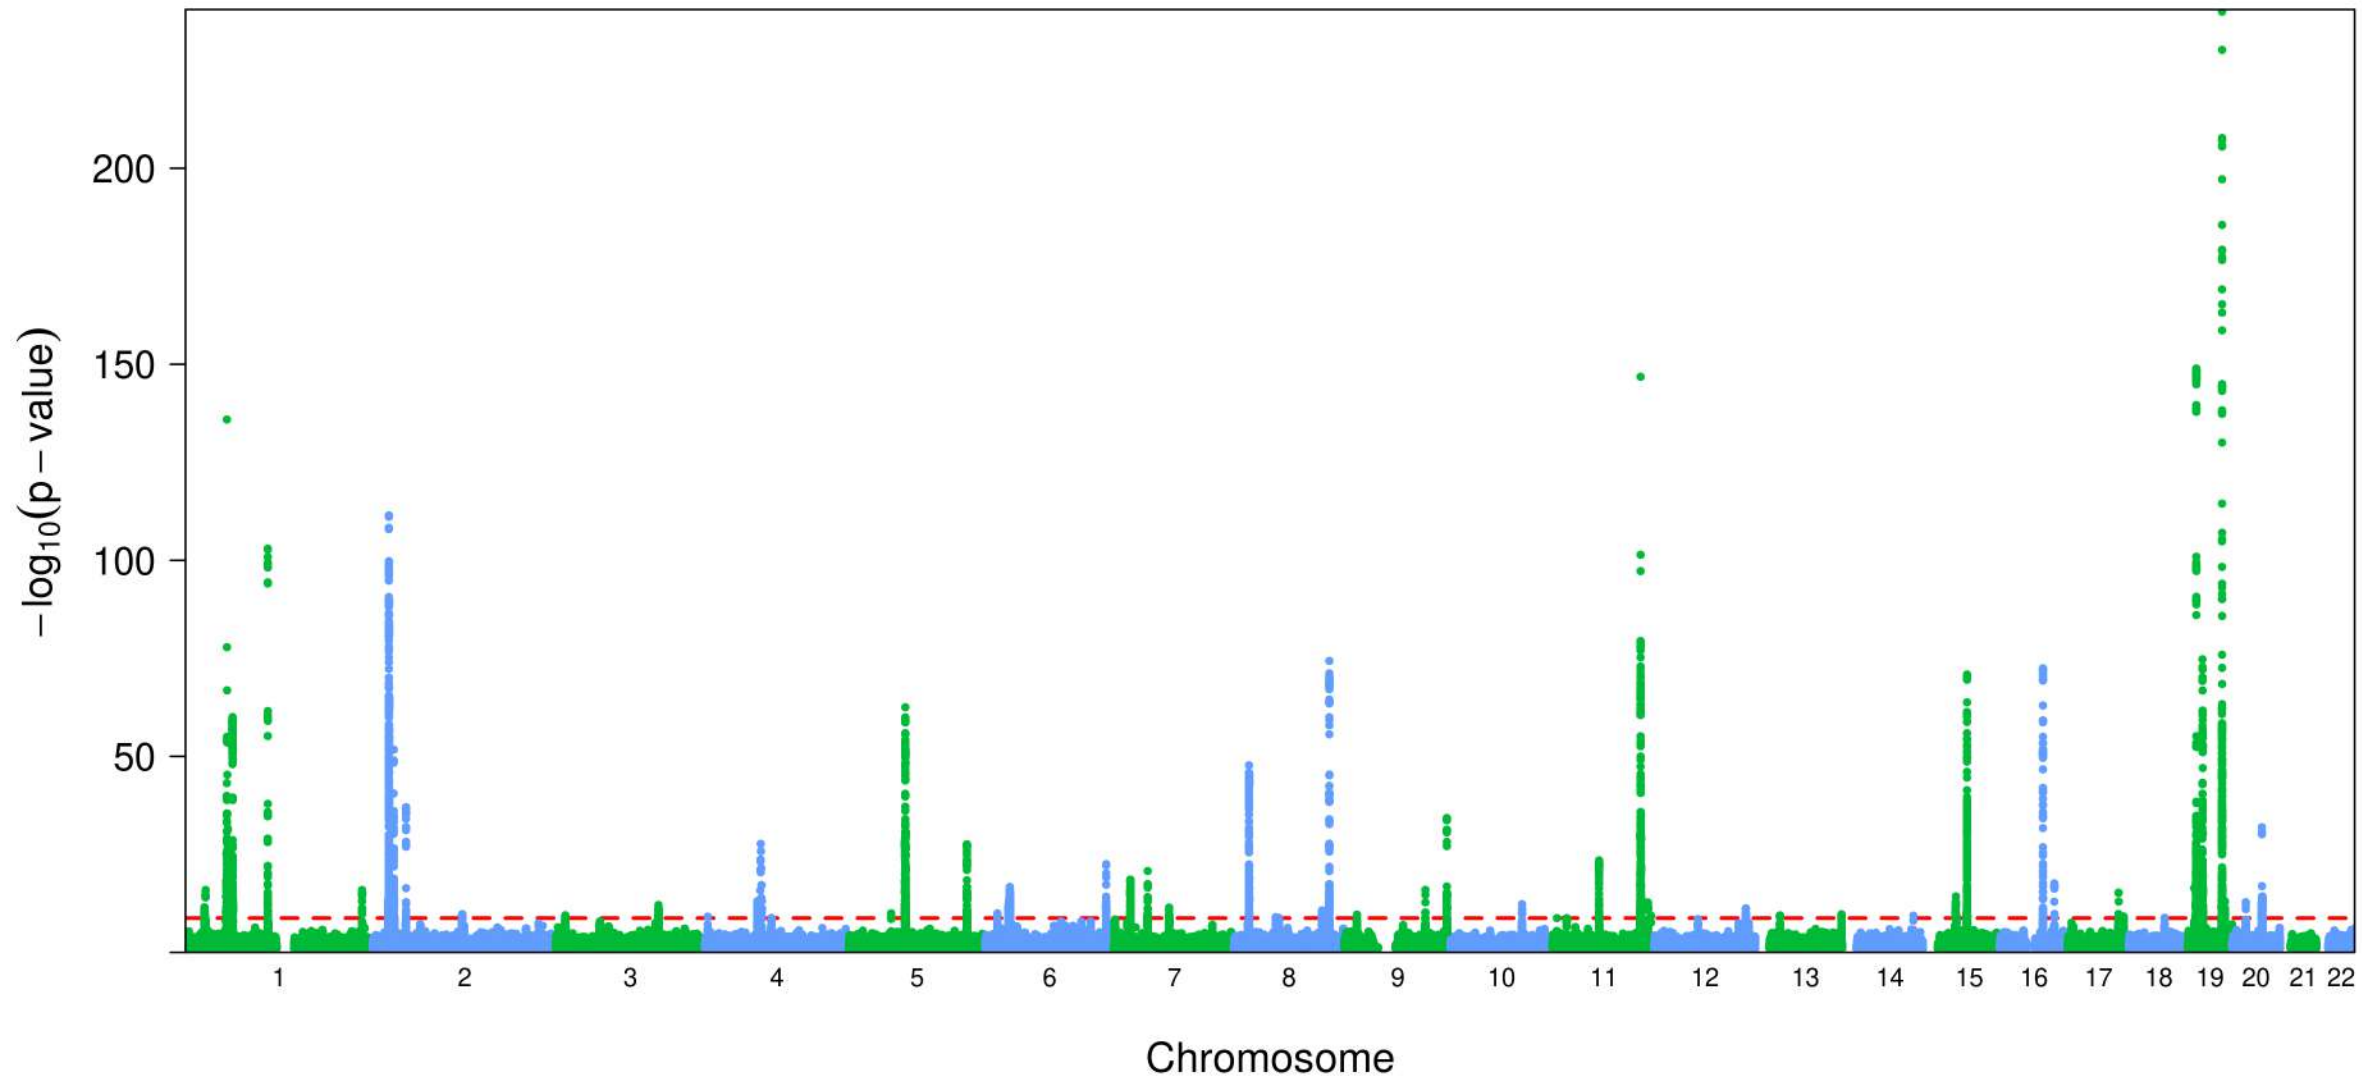

# S-HDL-C

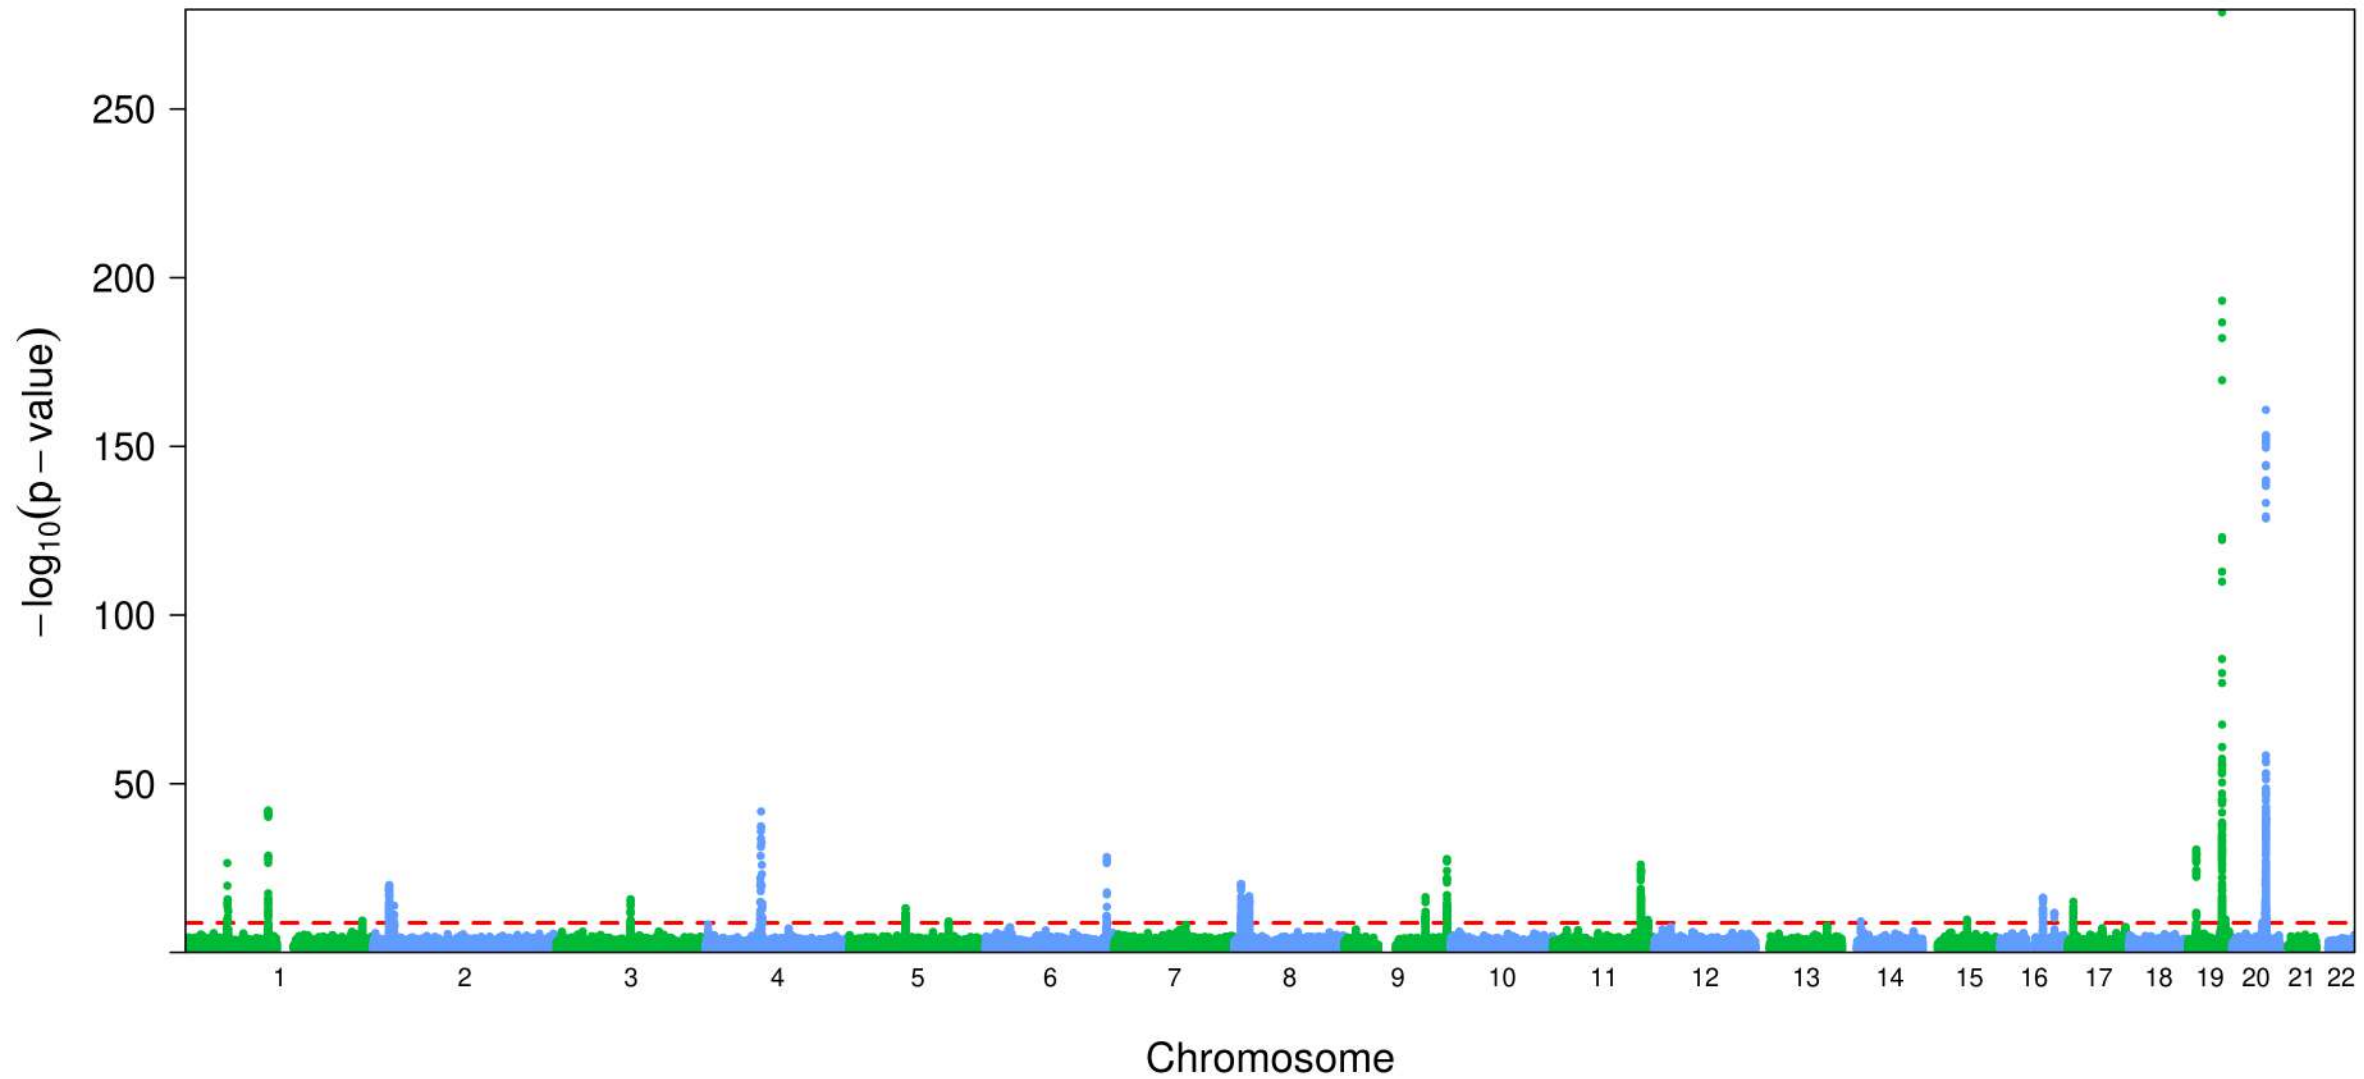

# S-HDL-C\_percent

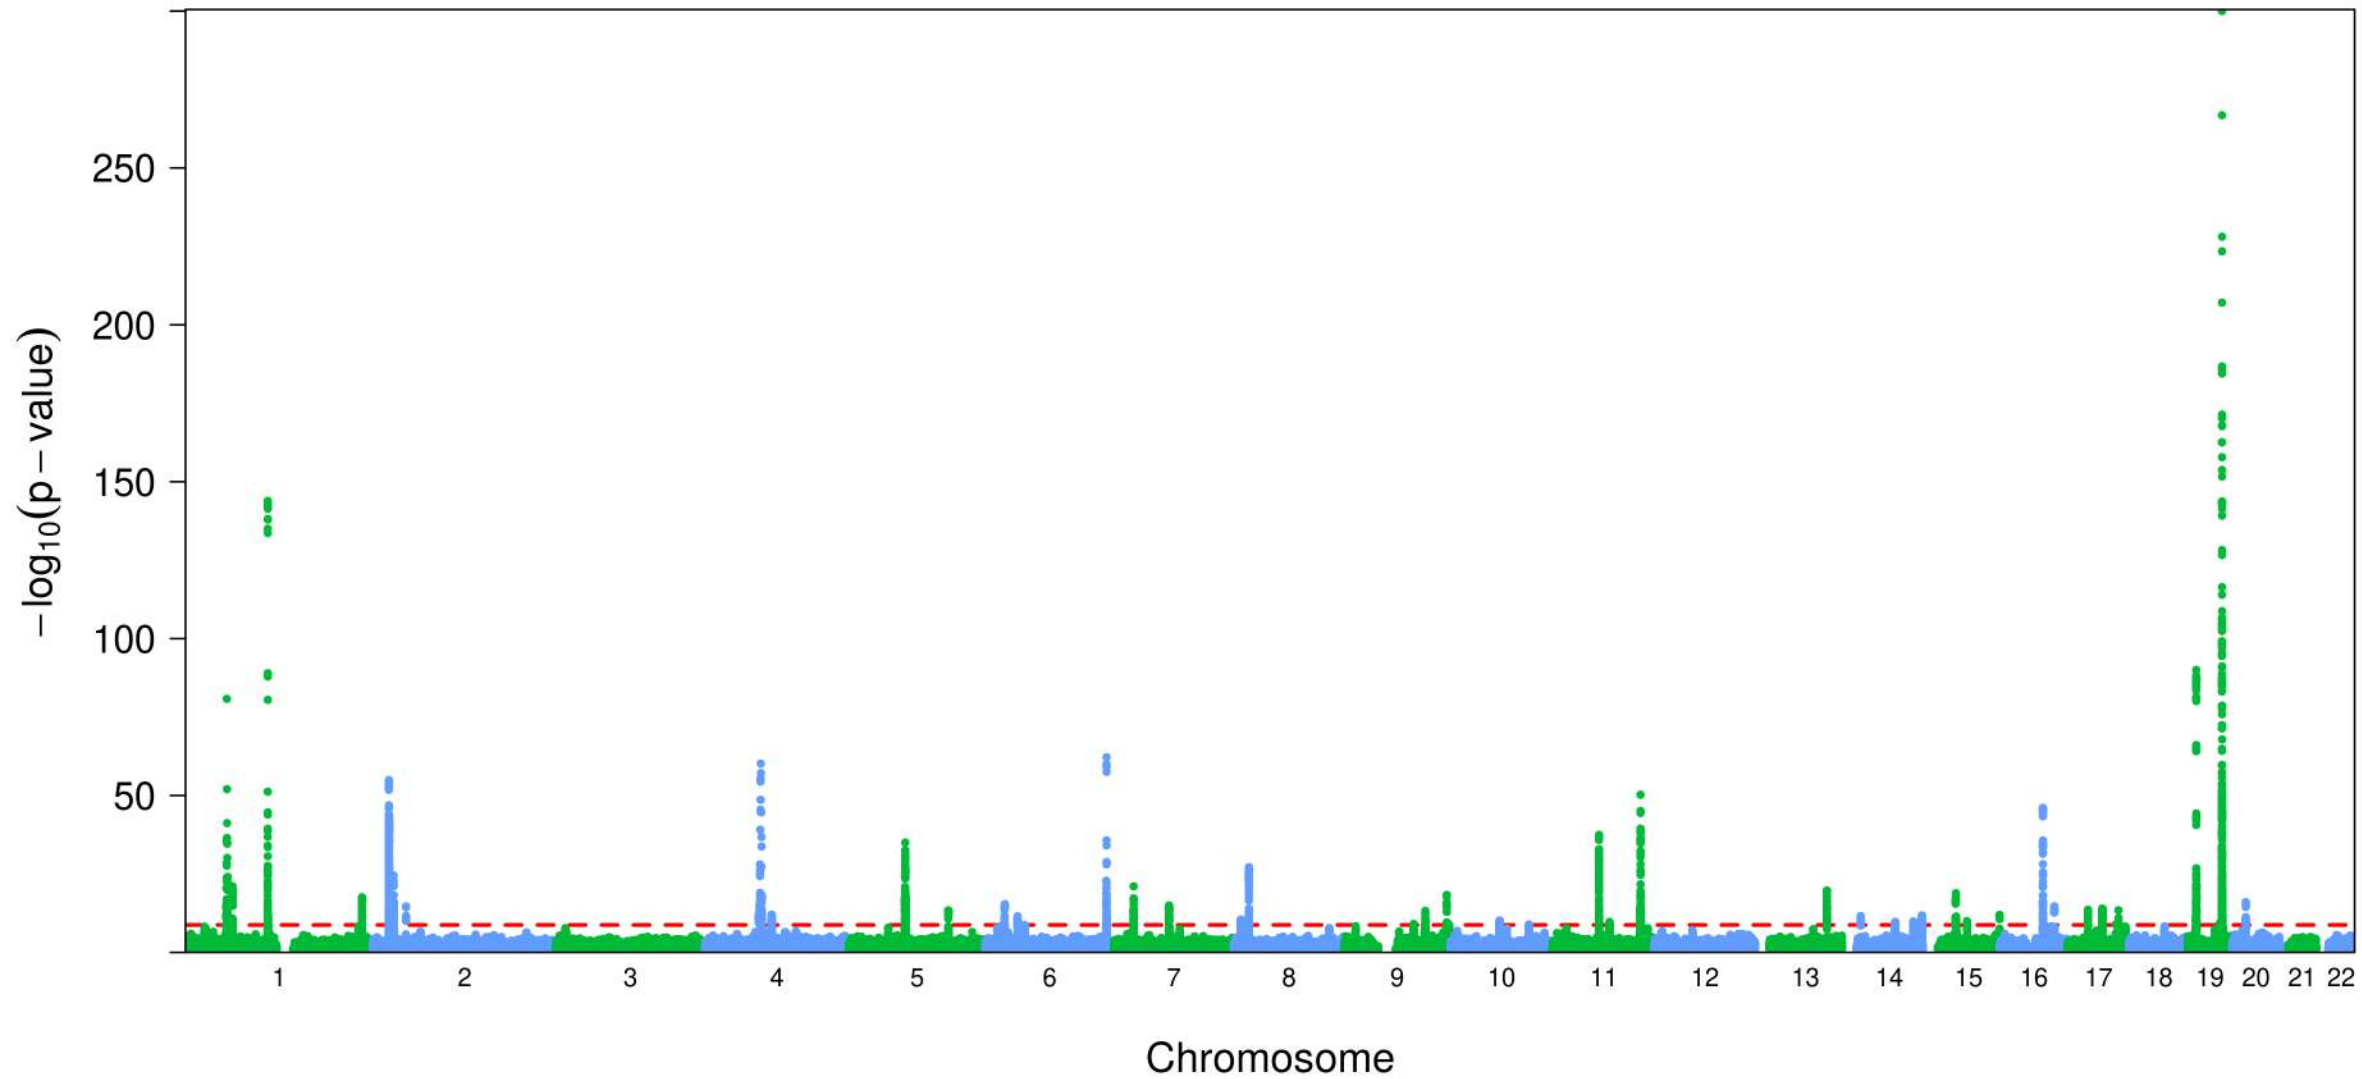



# S-HDL-CE

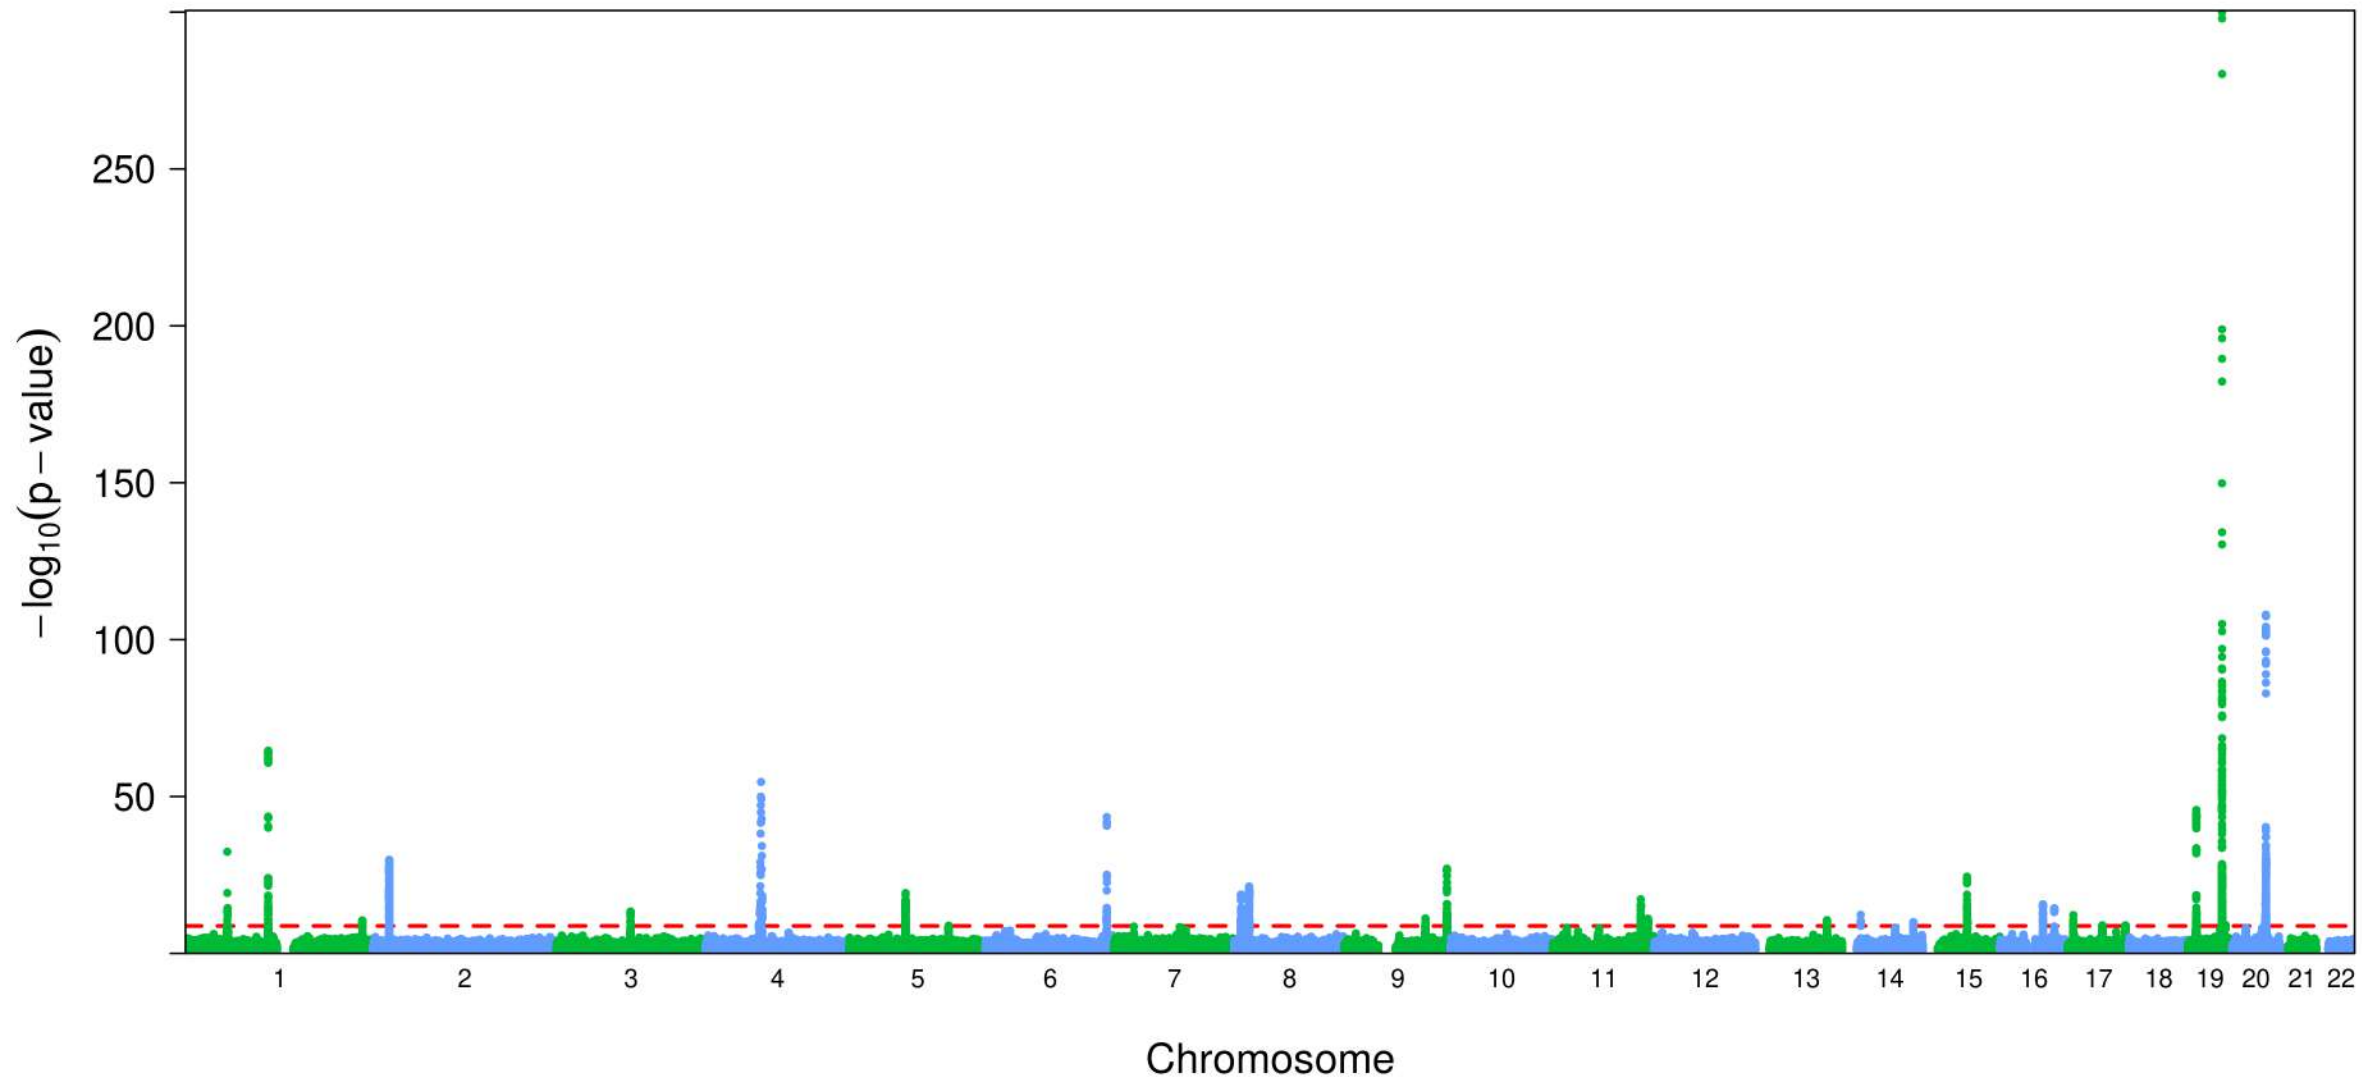

# S-HDL-CE\_percent

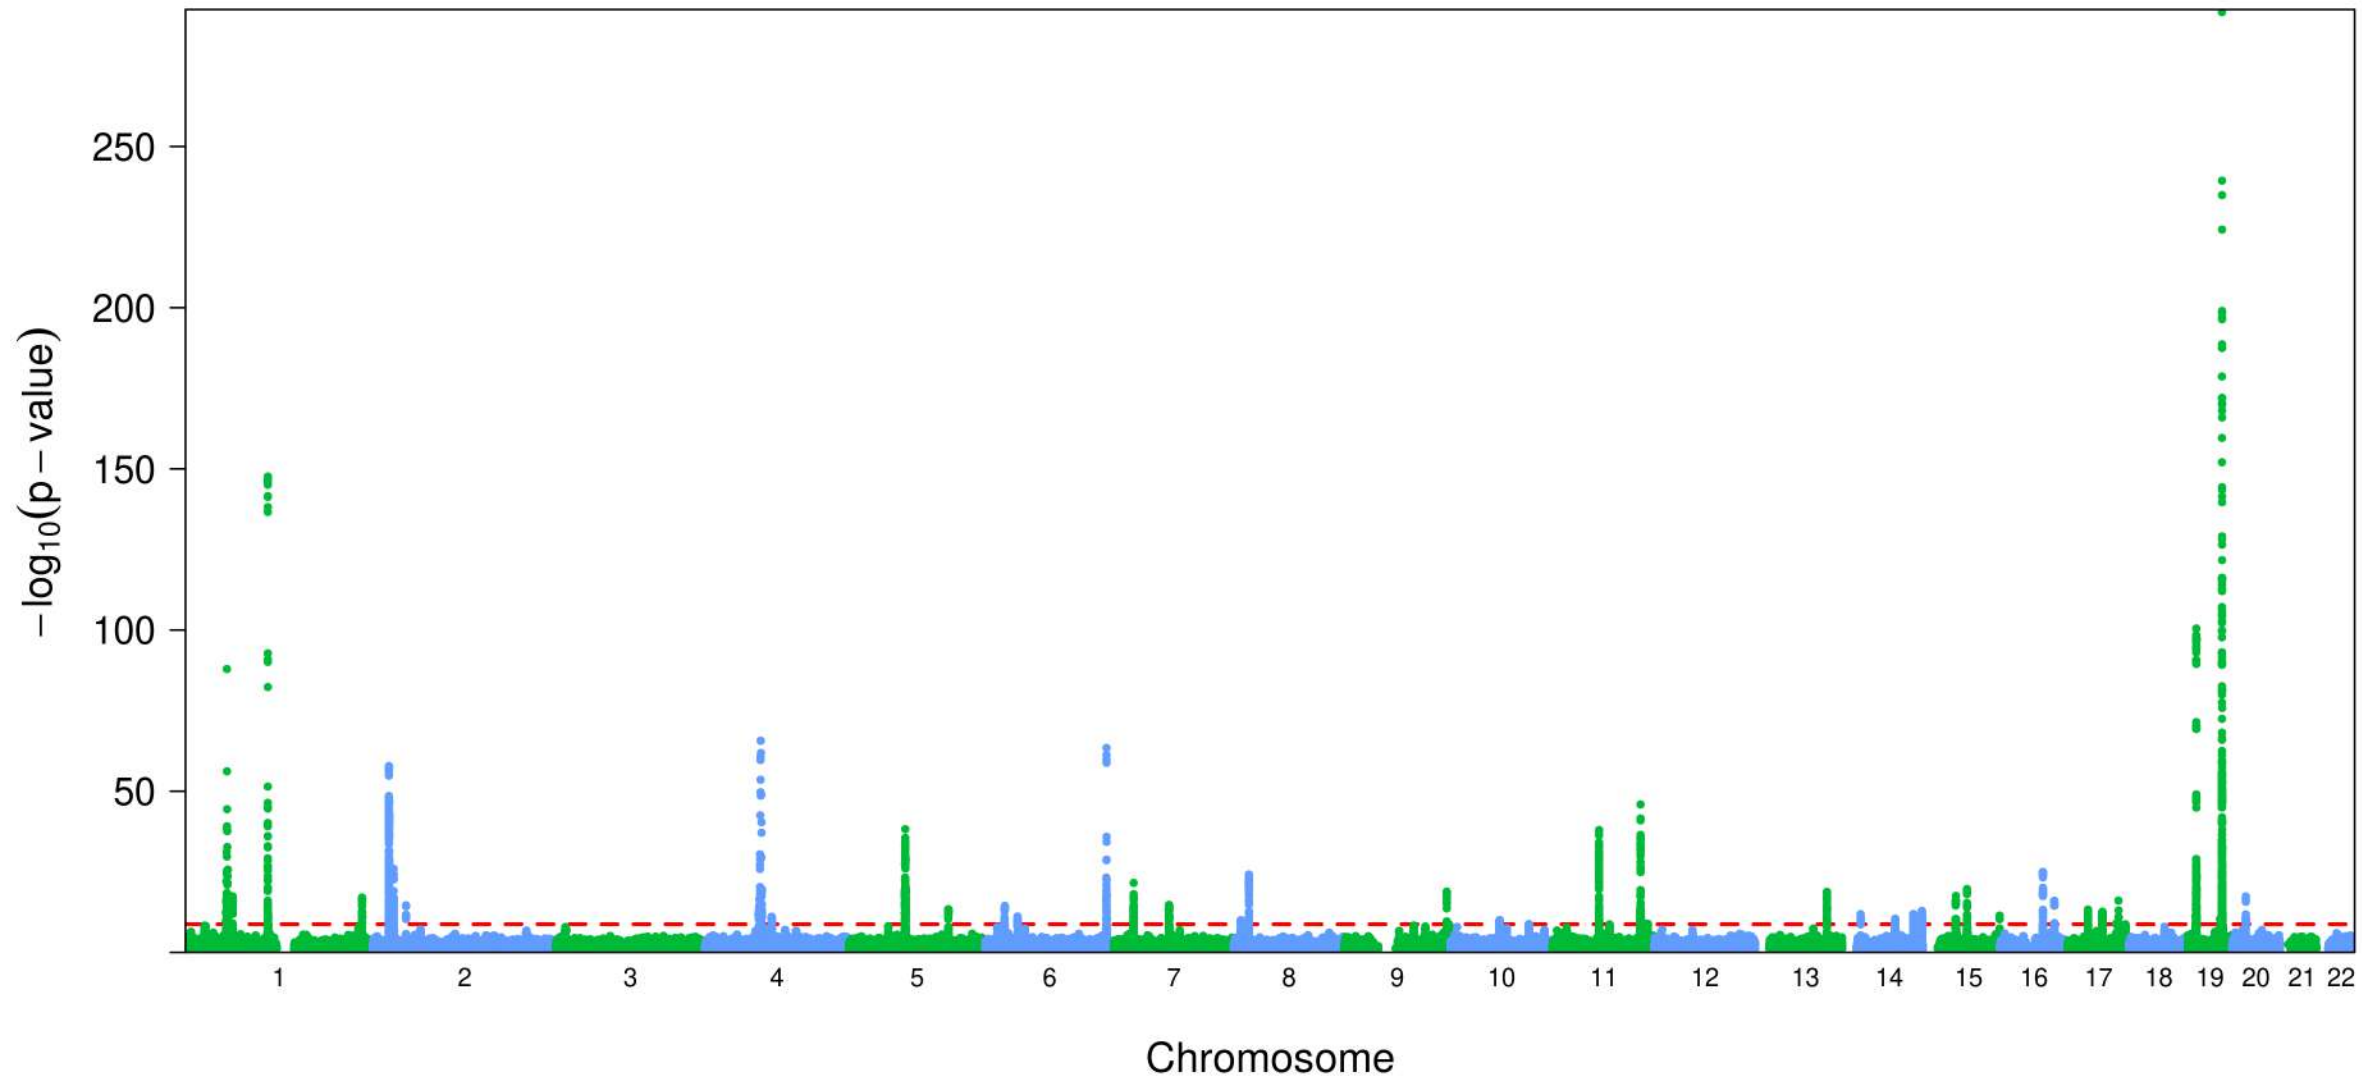

# S-HDL-FC

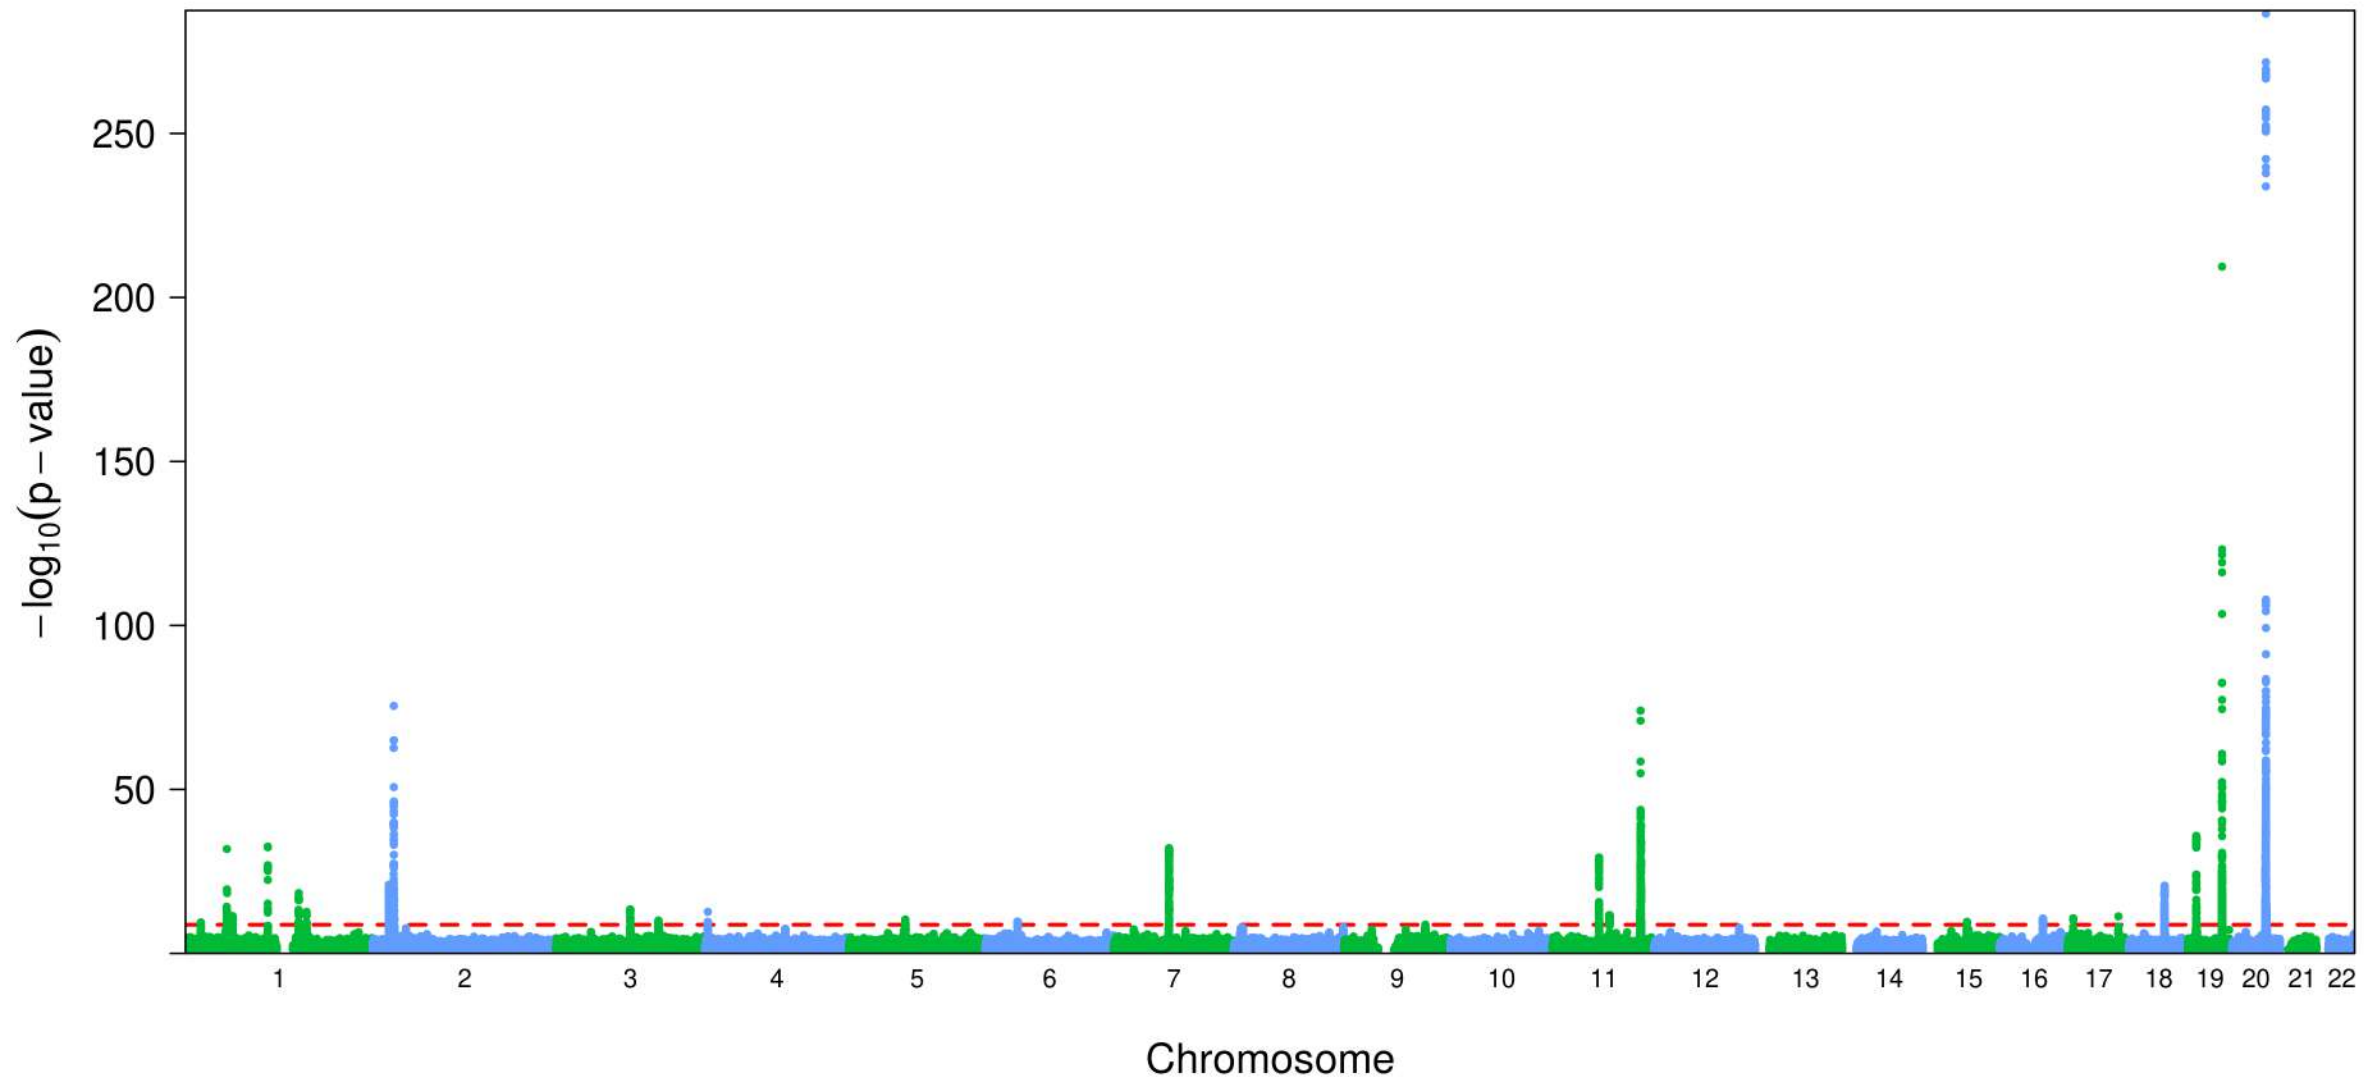

# S-HDL-FC\_percent

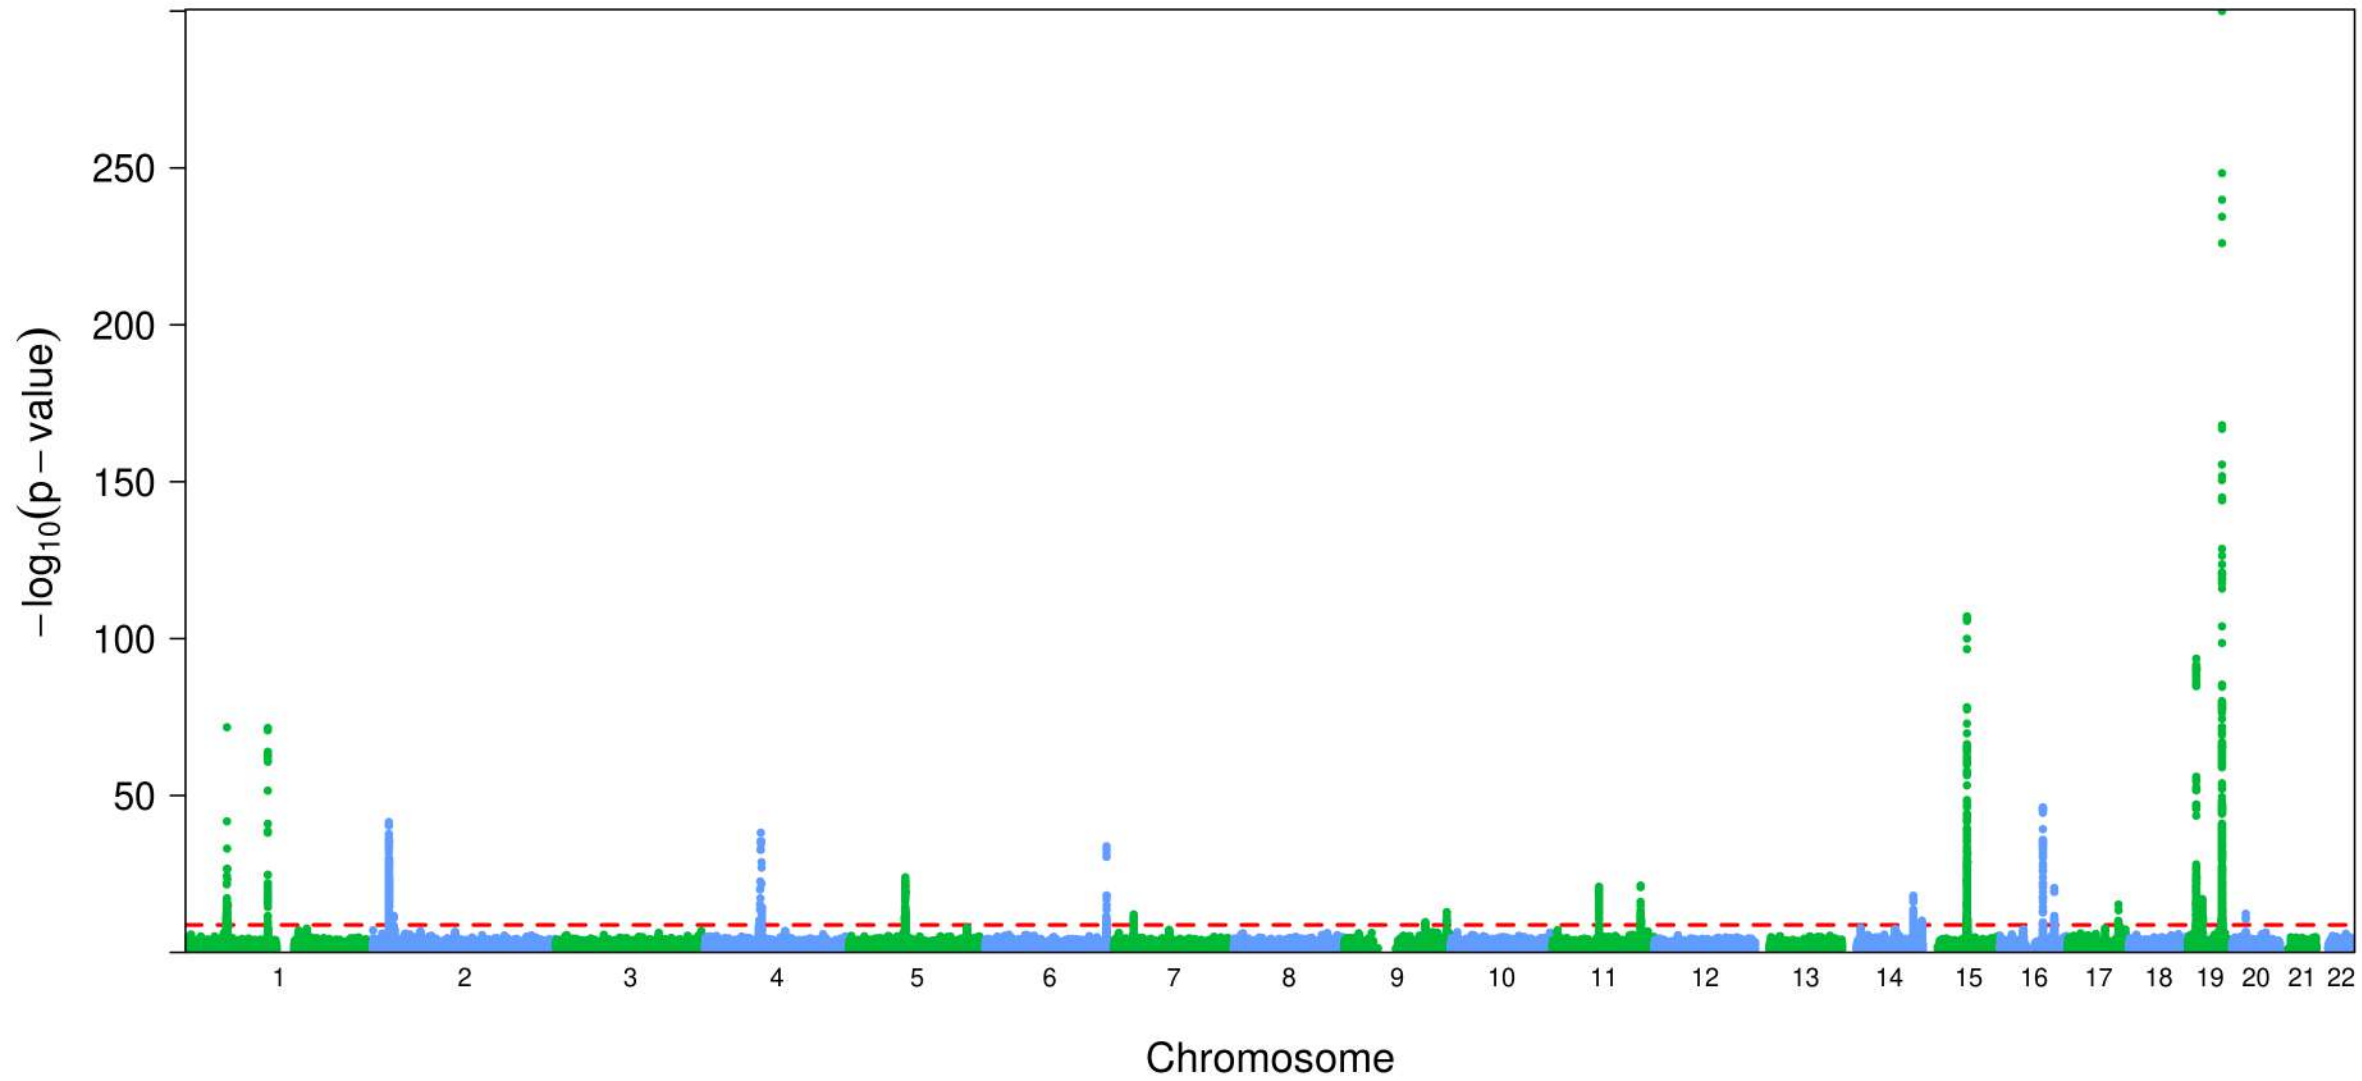

# S-HDL-L

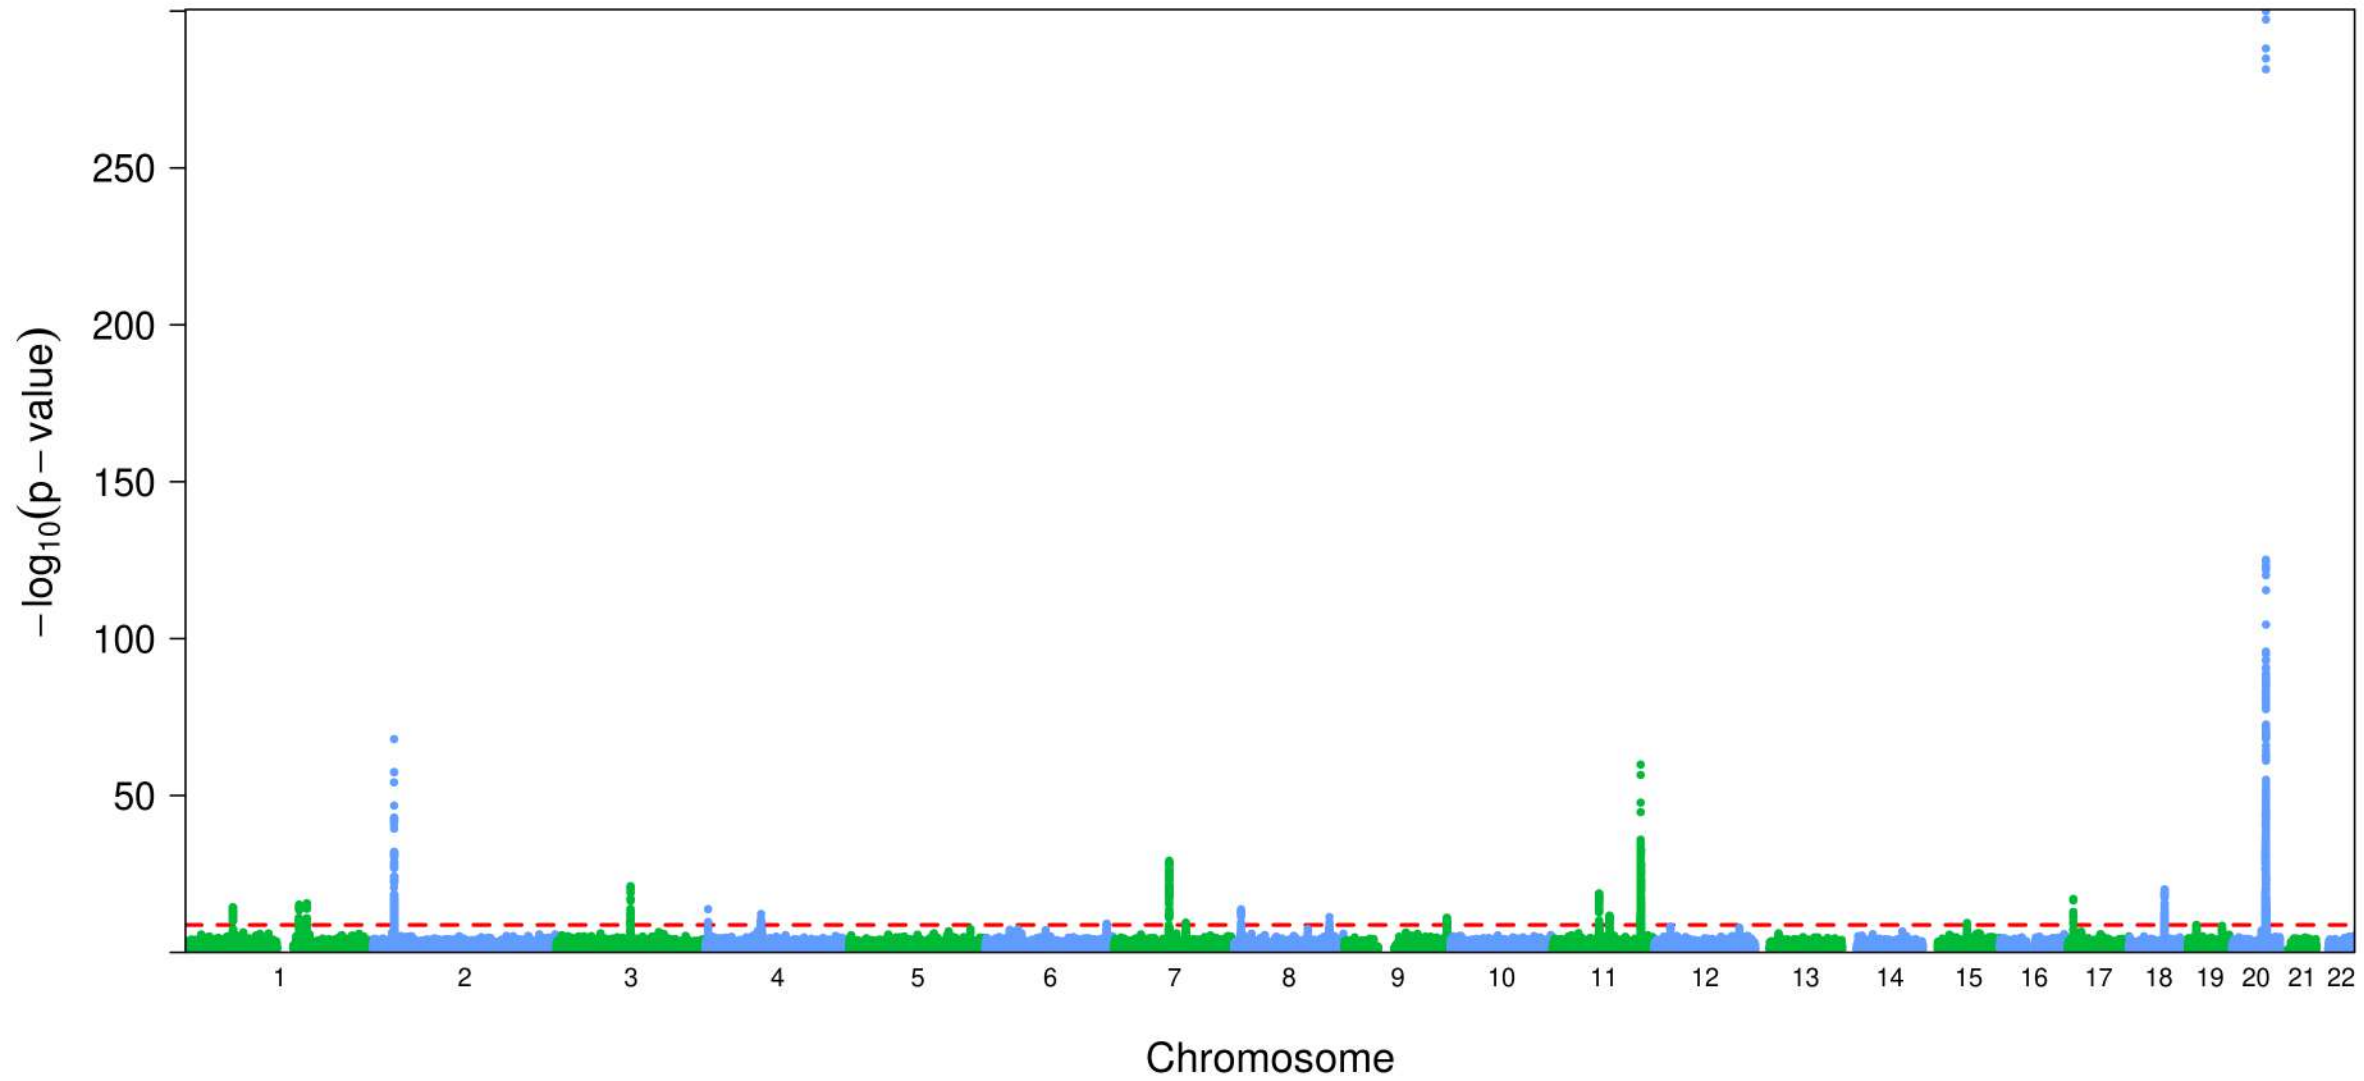

# S-HDL-P

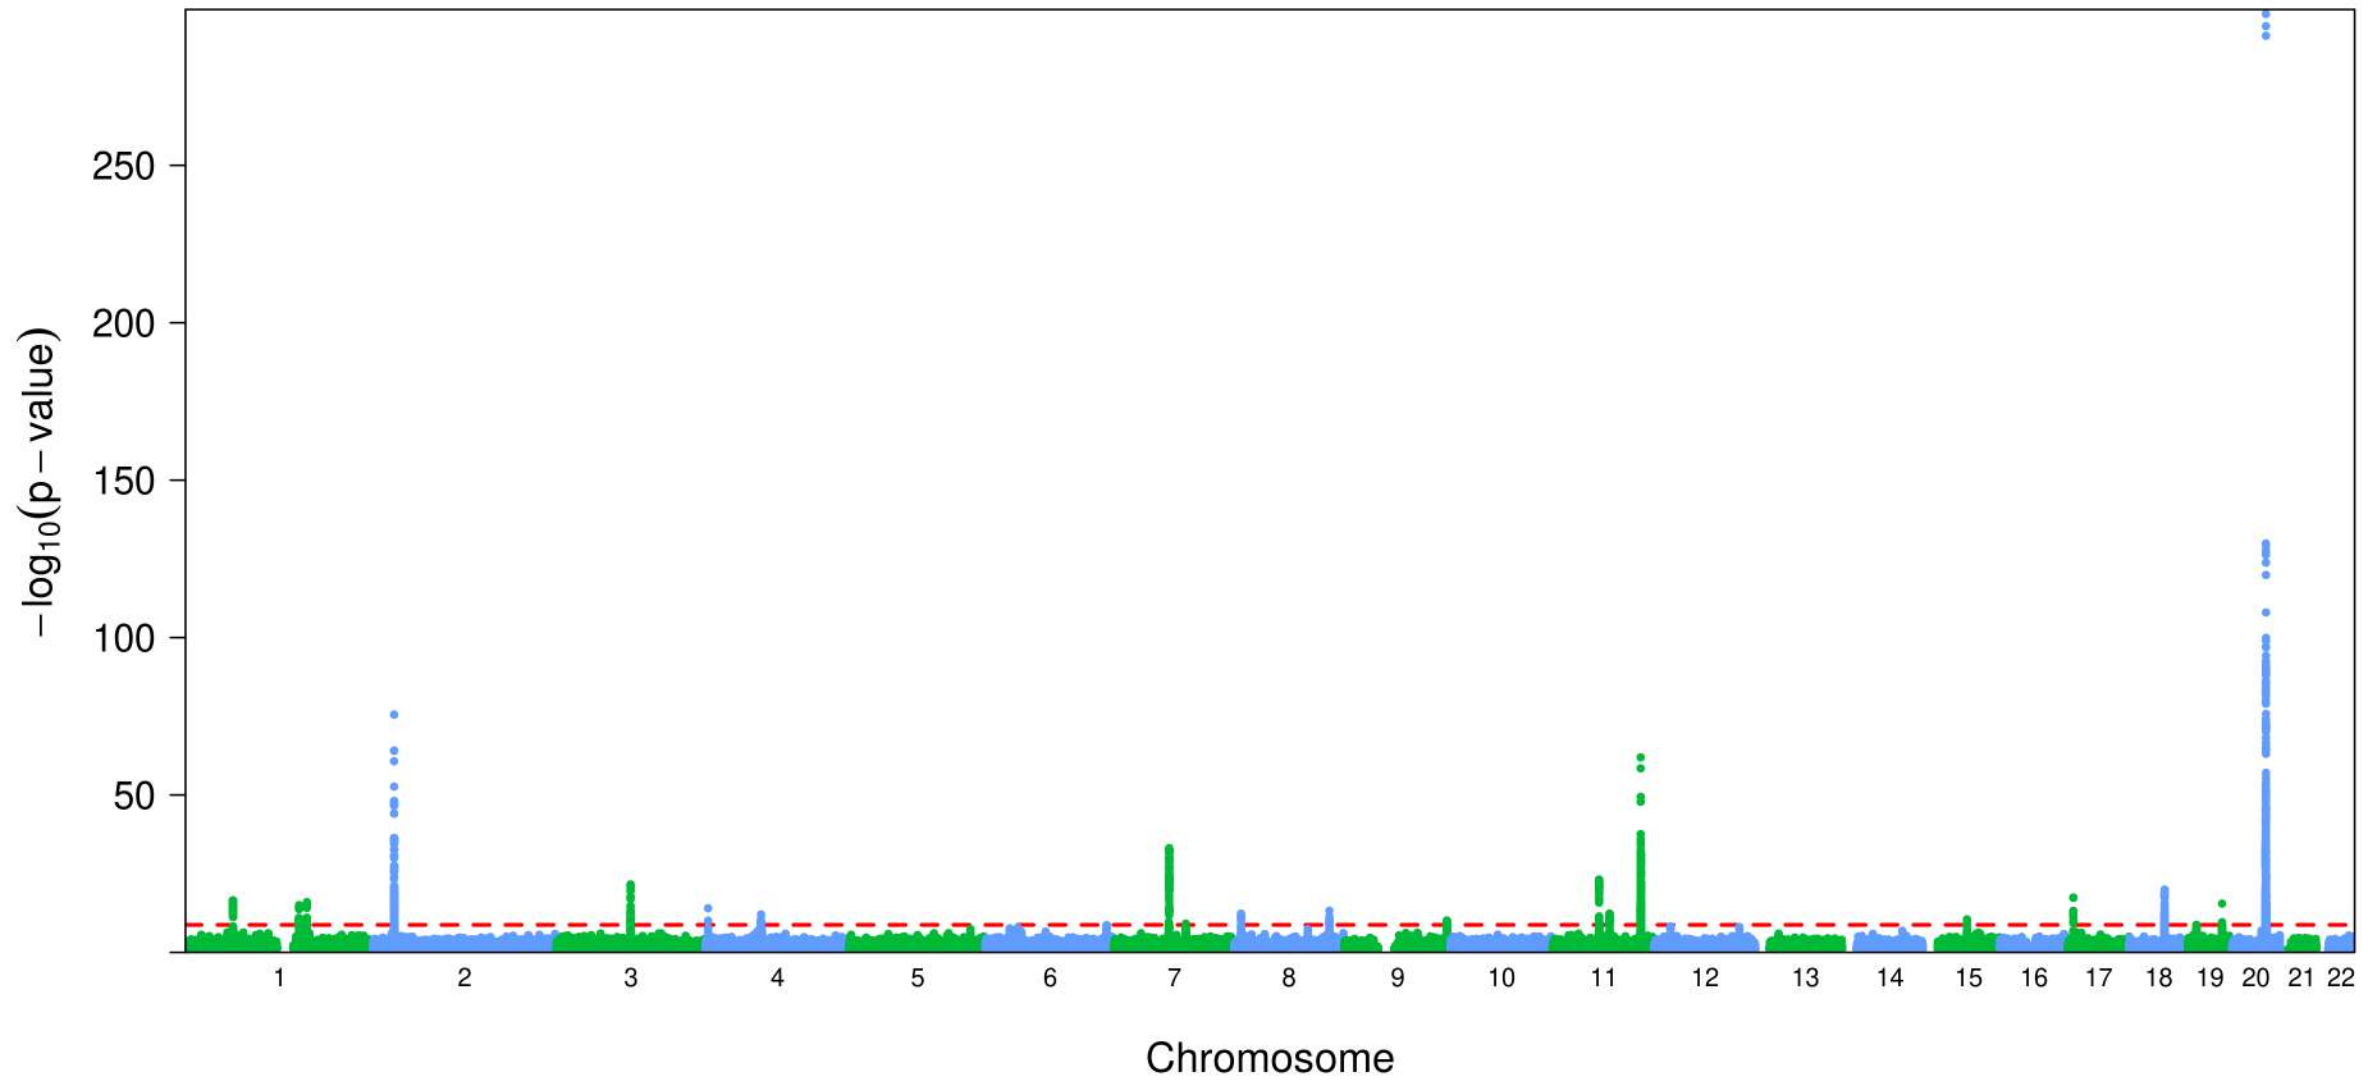

# S-HDL-PL

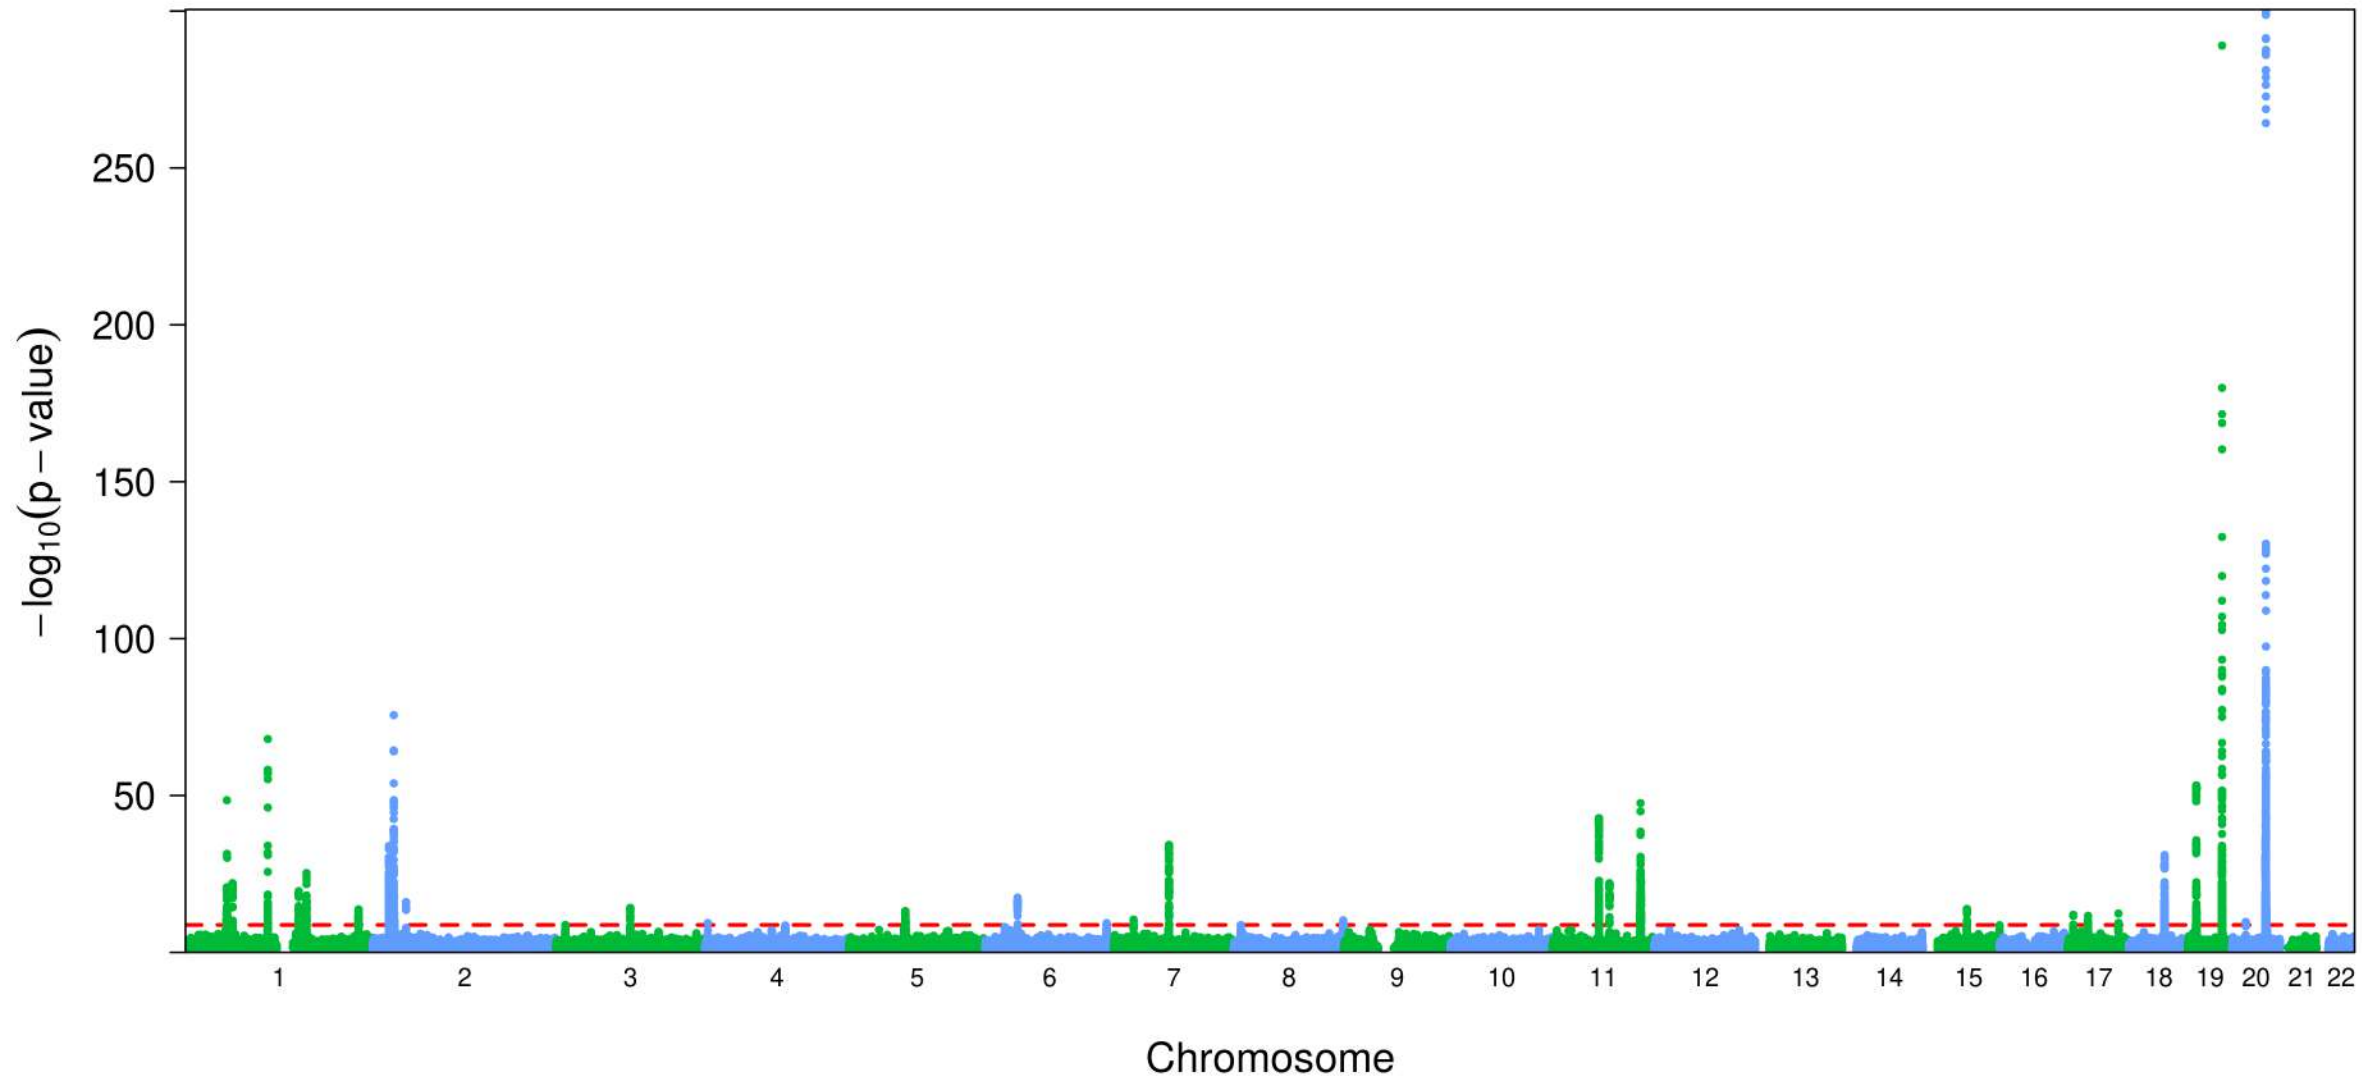

# S-HDL-PL\_percent

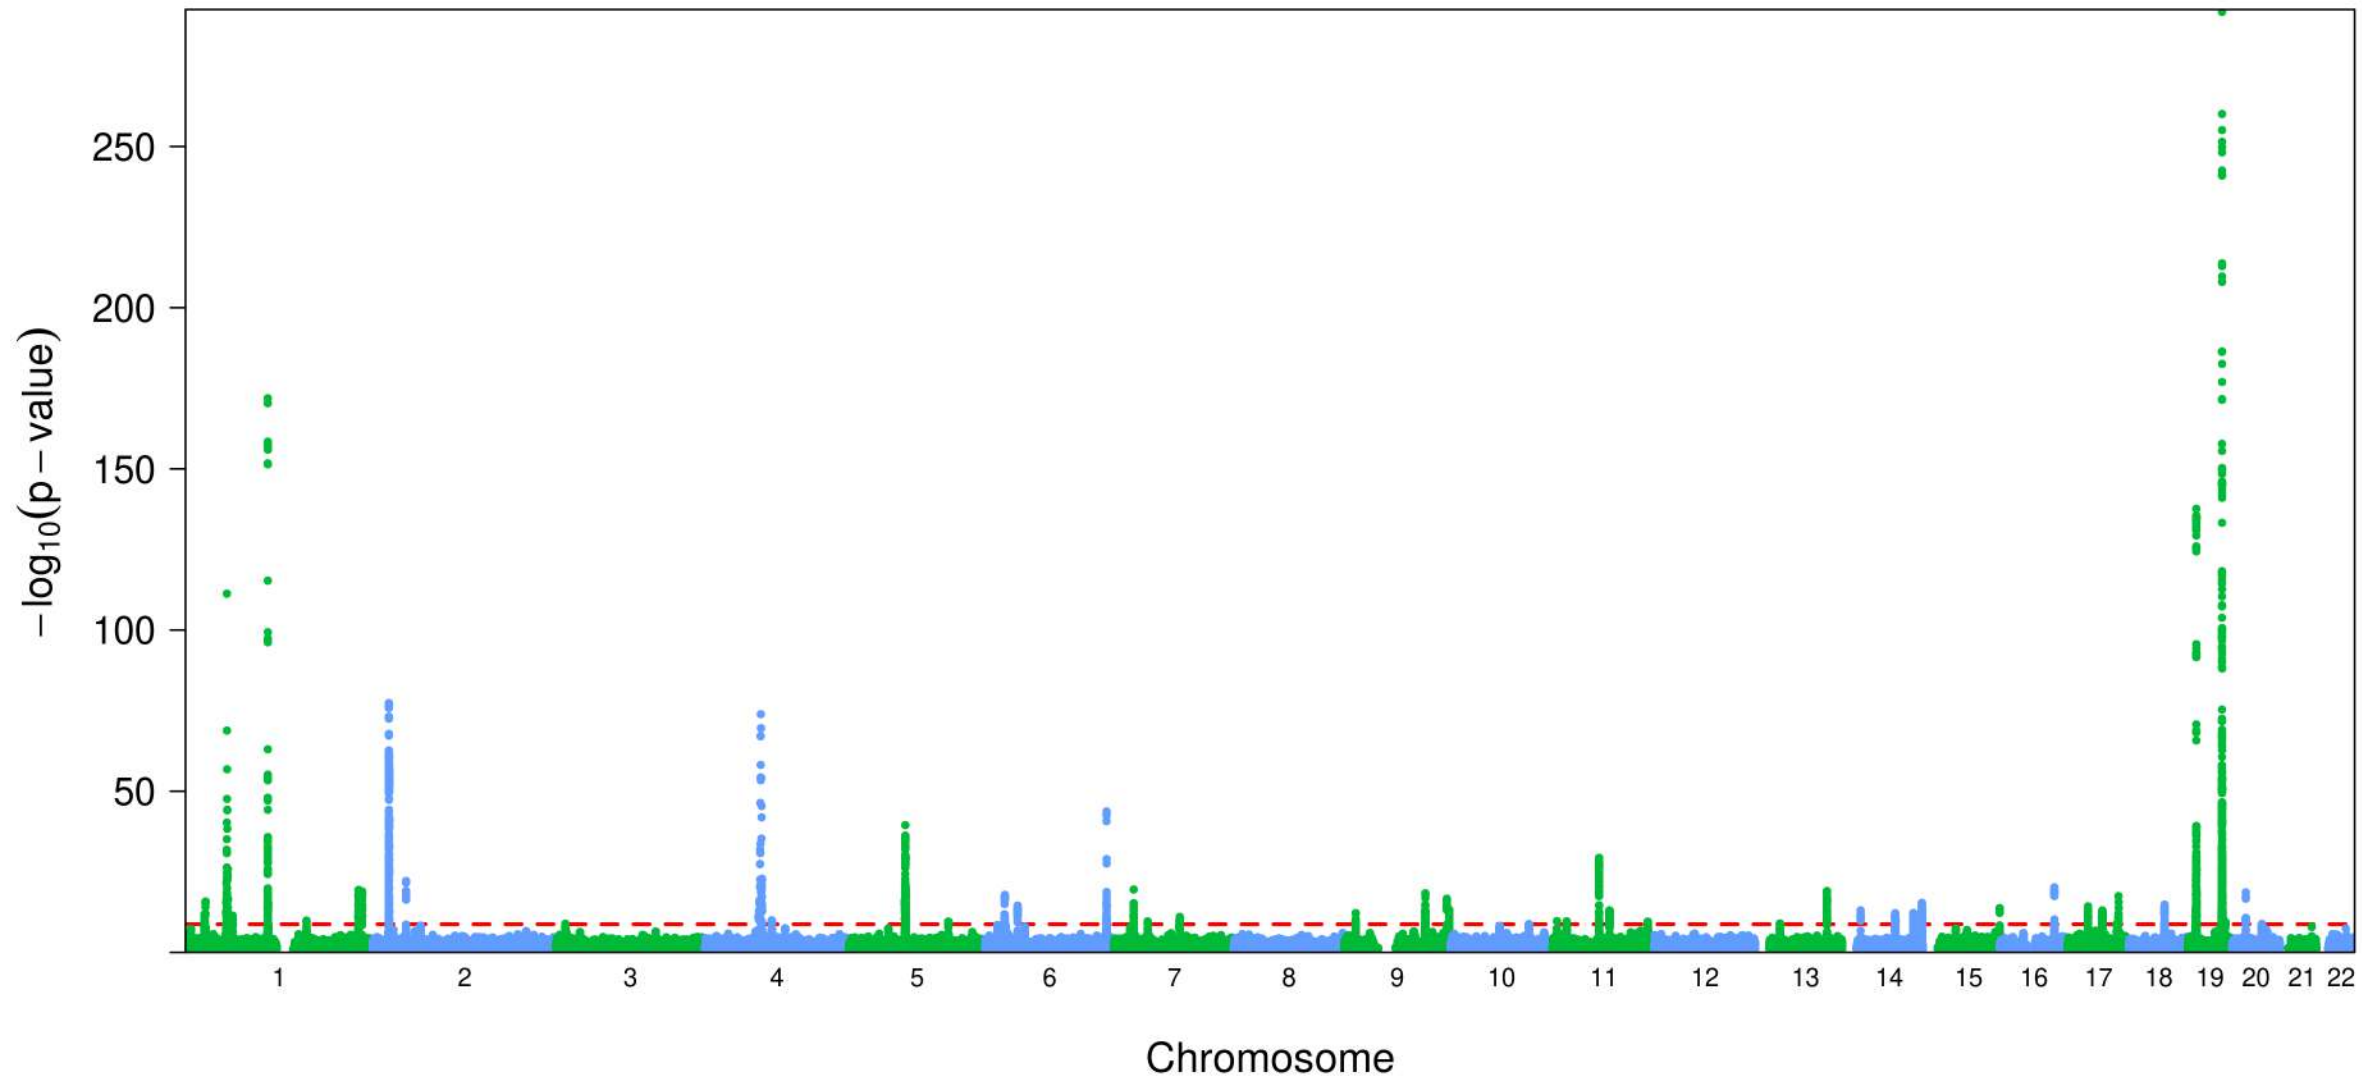



# S-HDL-TG

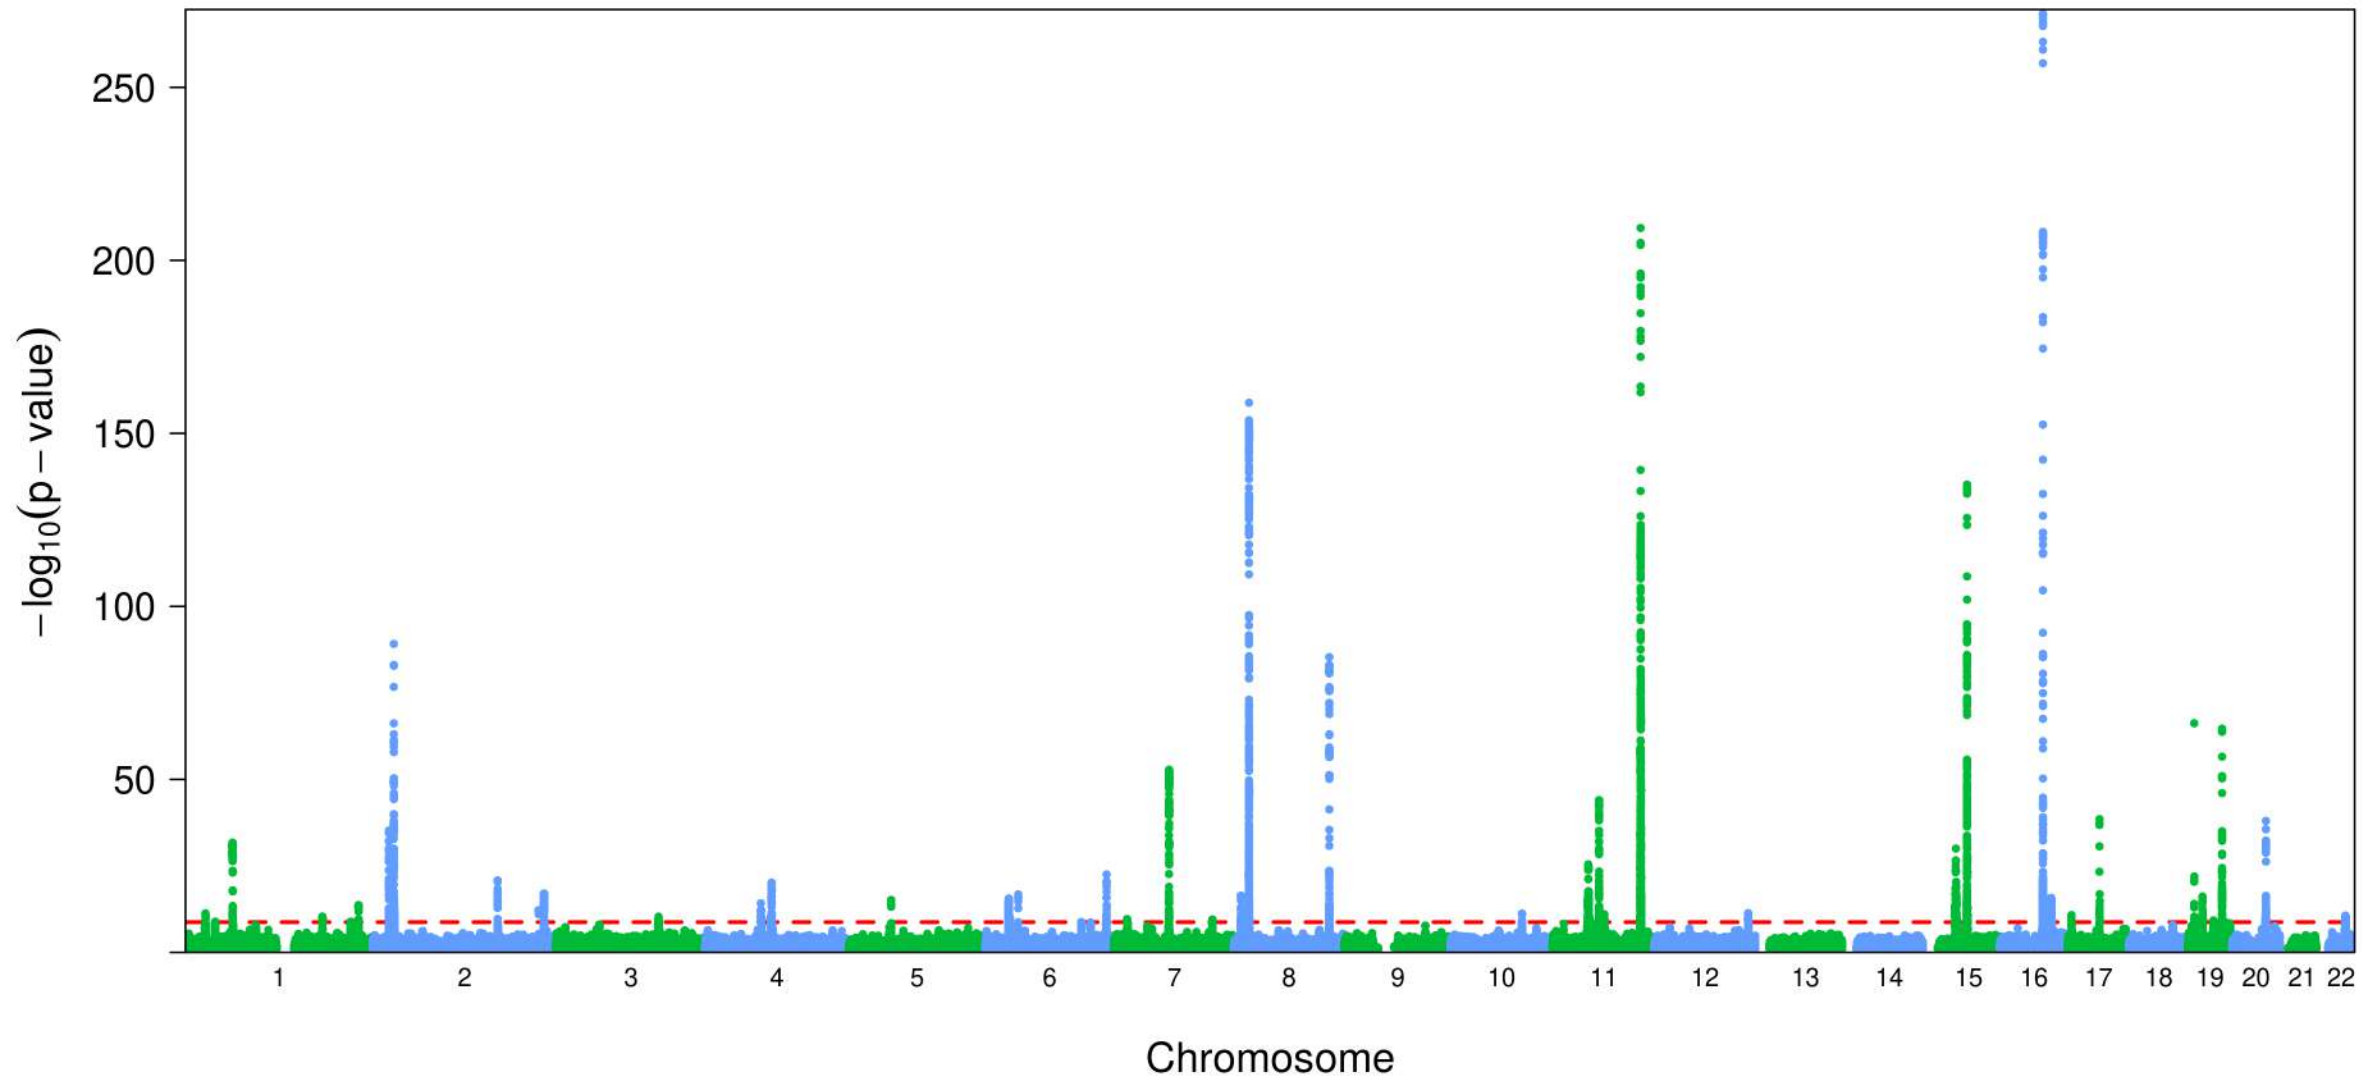

# S-HDL-TG\_percent

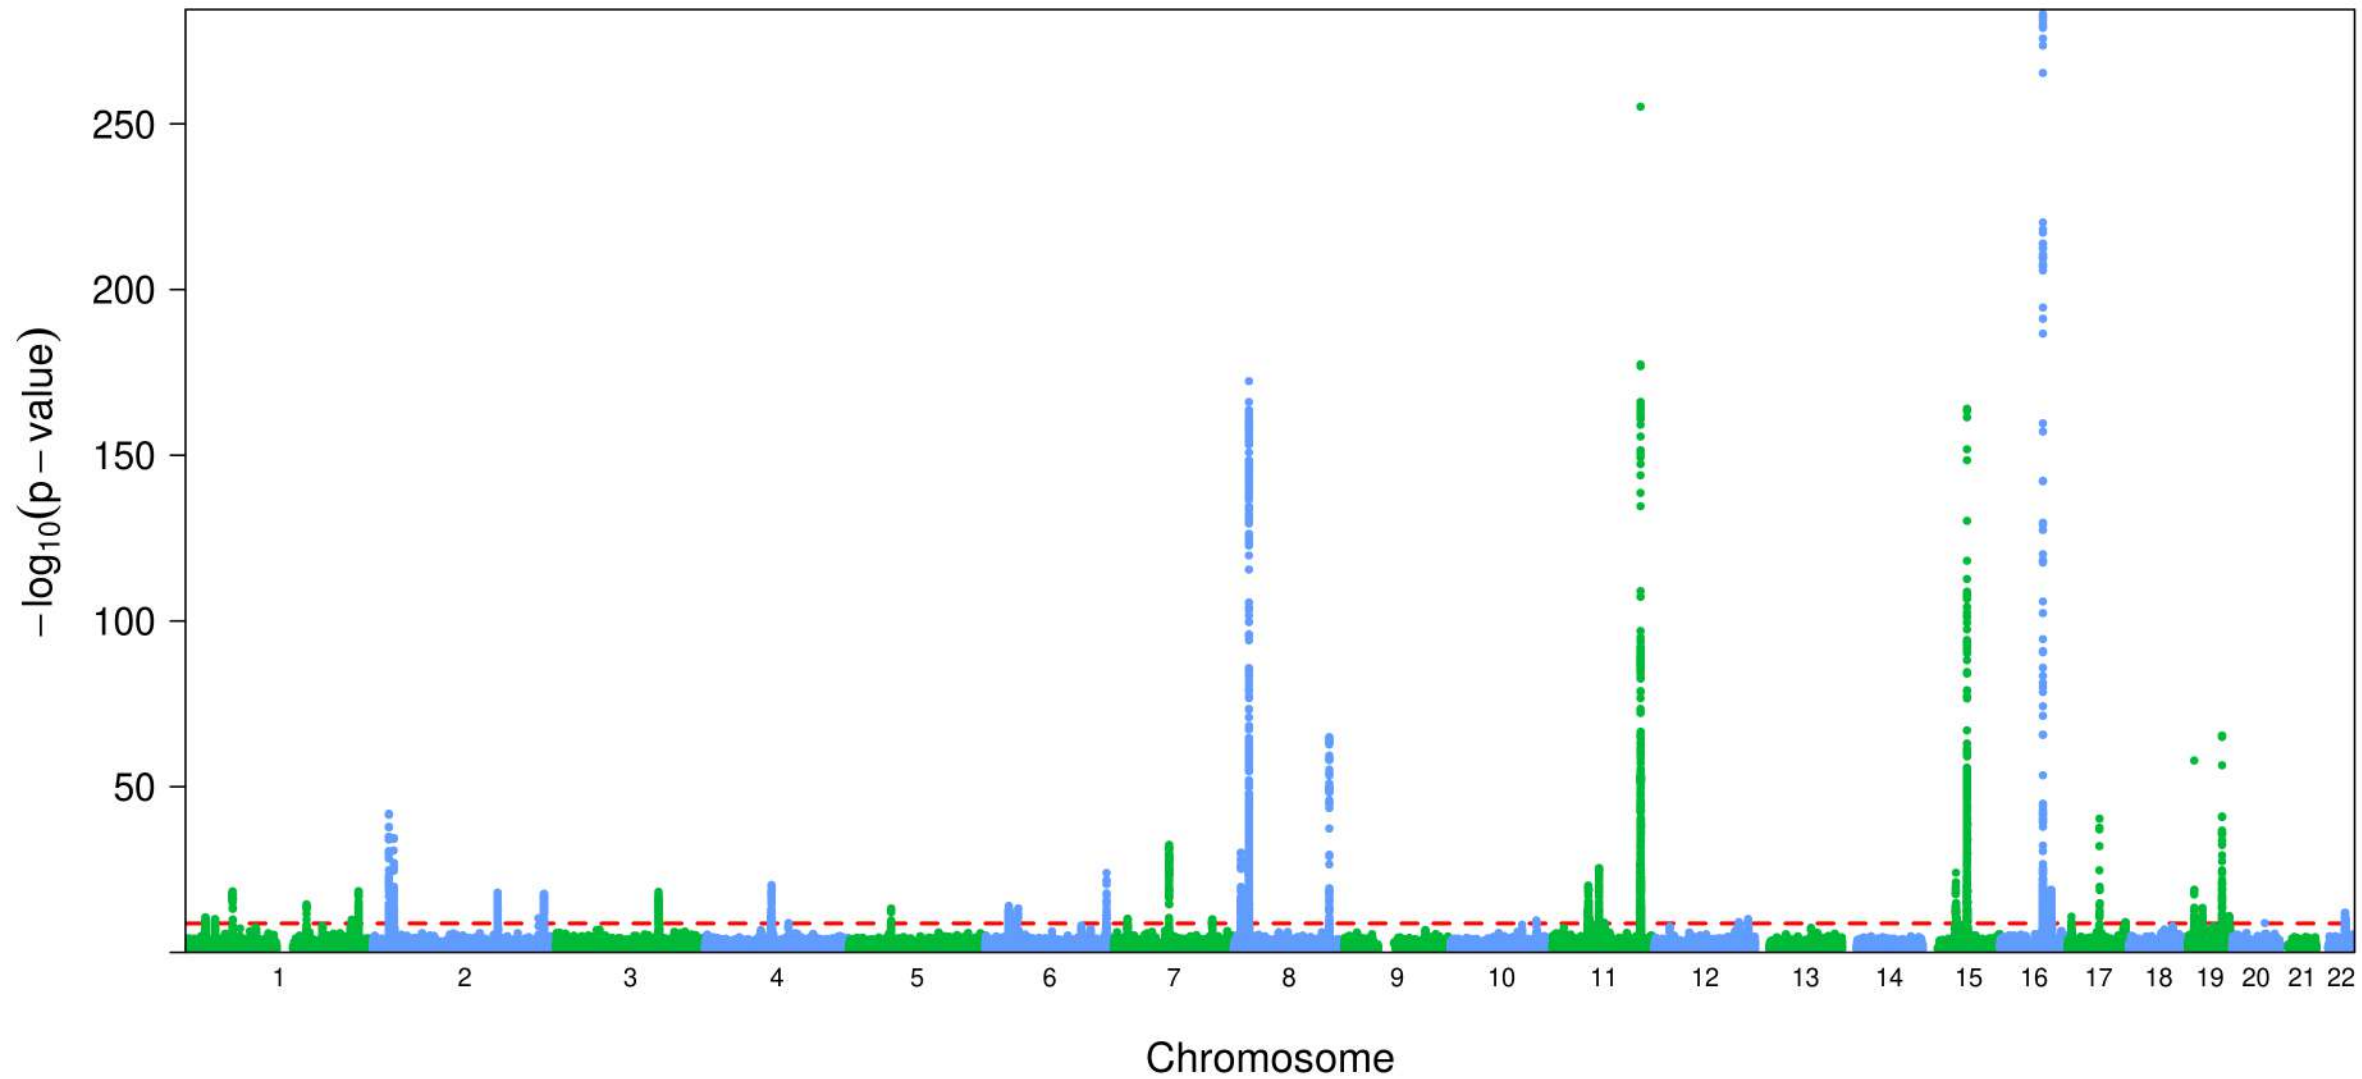

# S-LDL-C

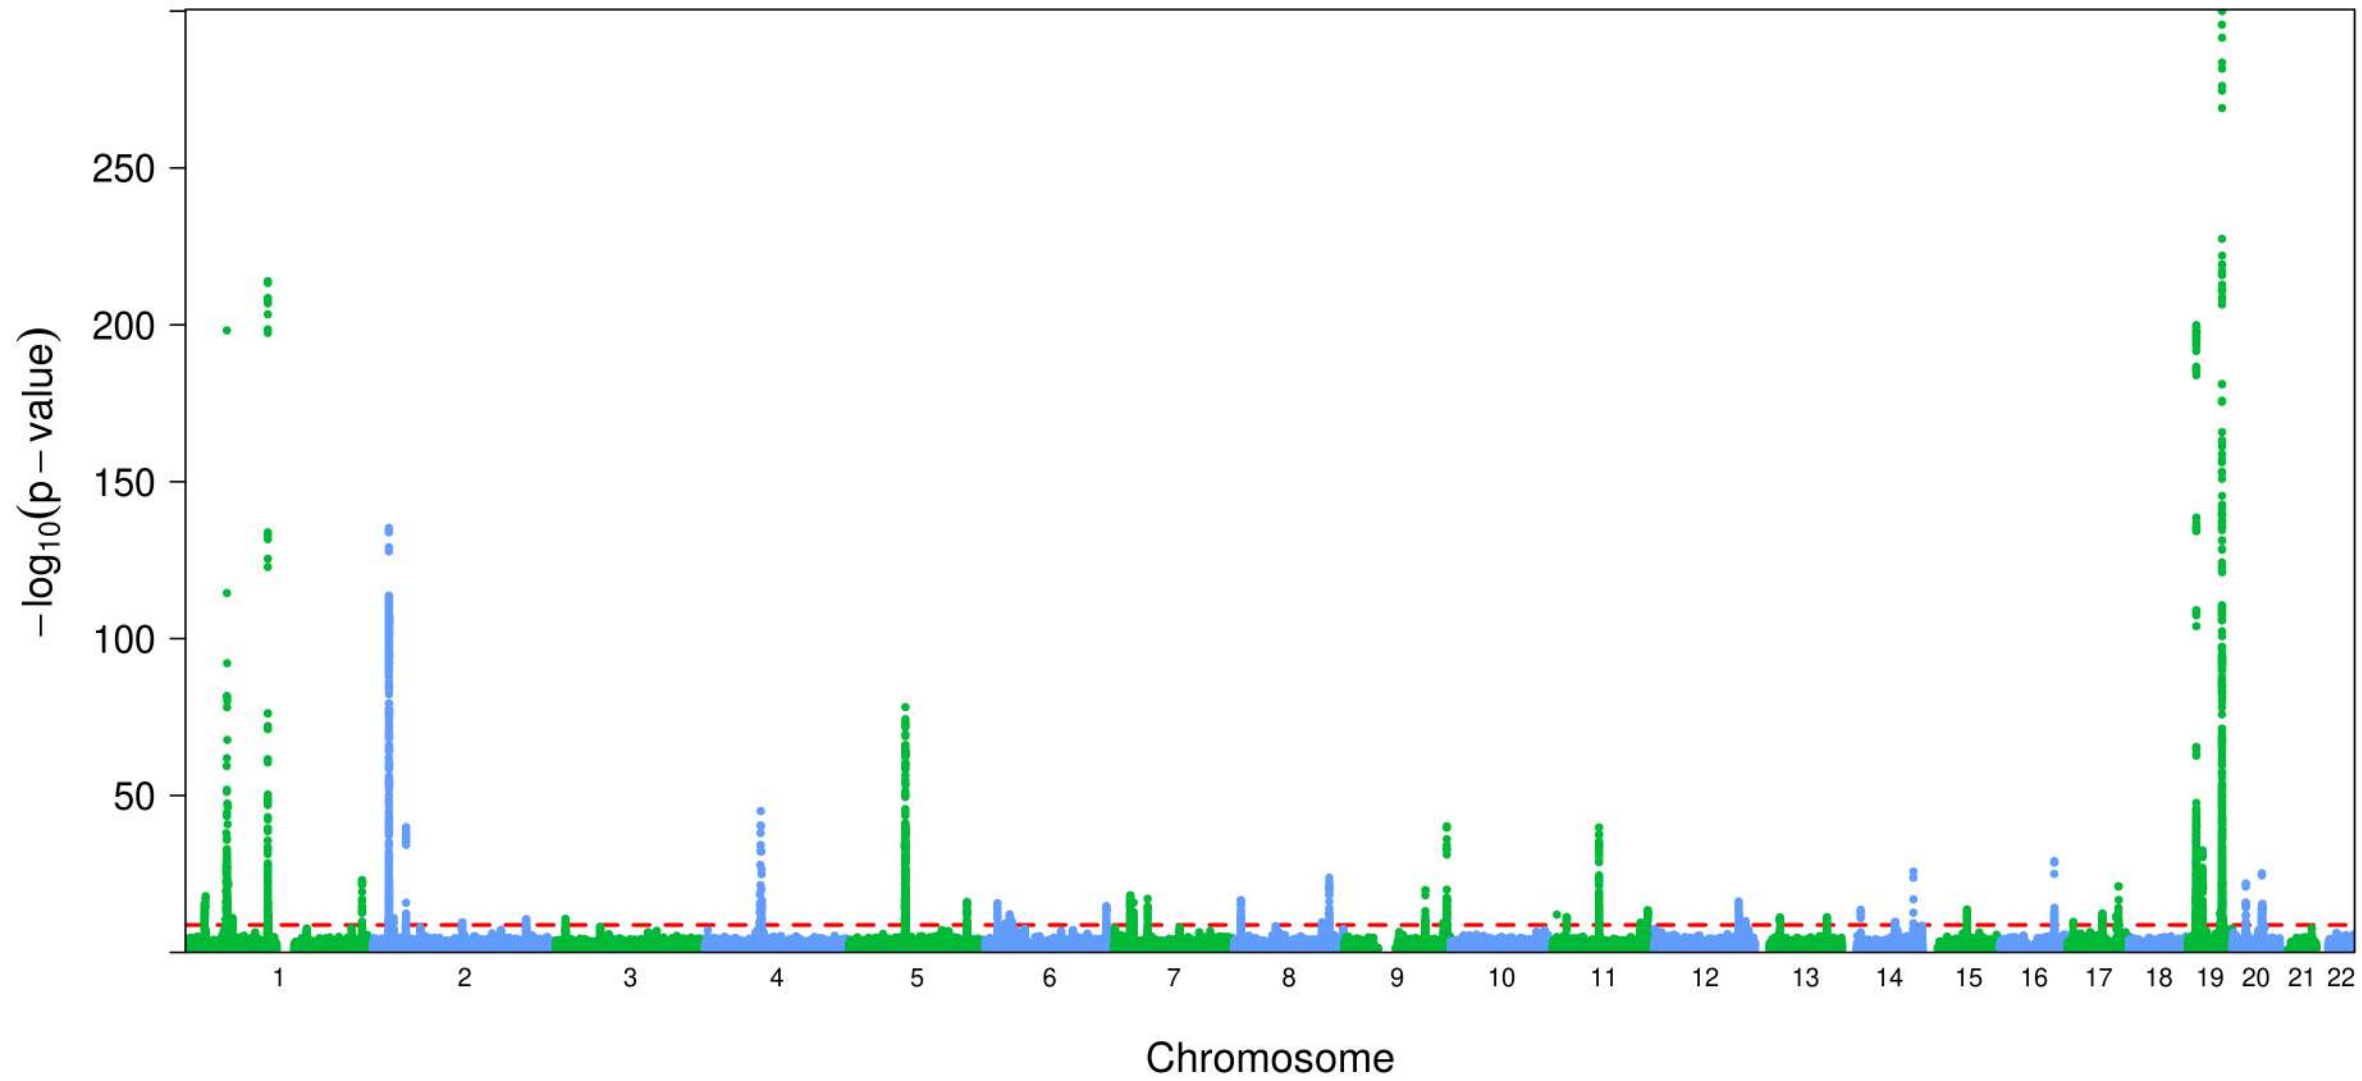

# S-LDL-C\_percent

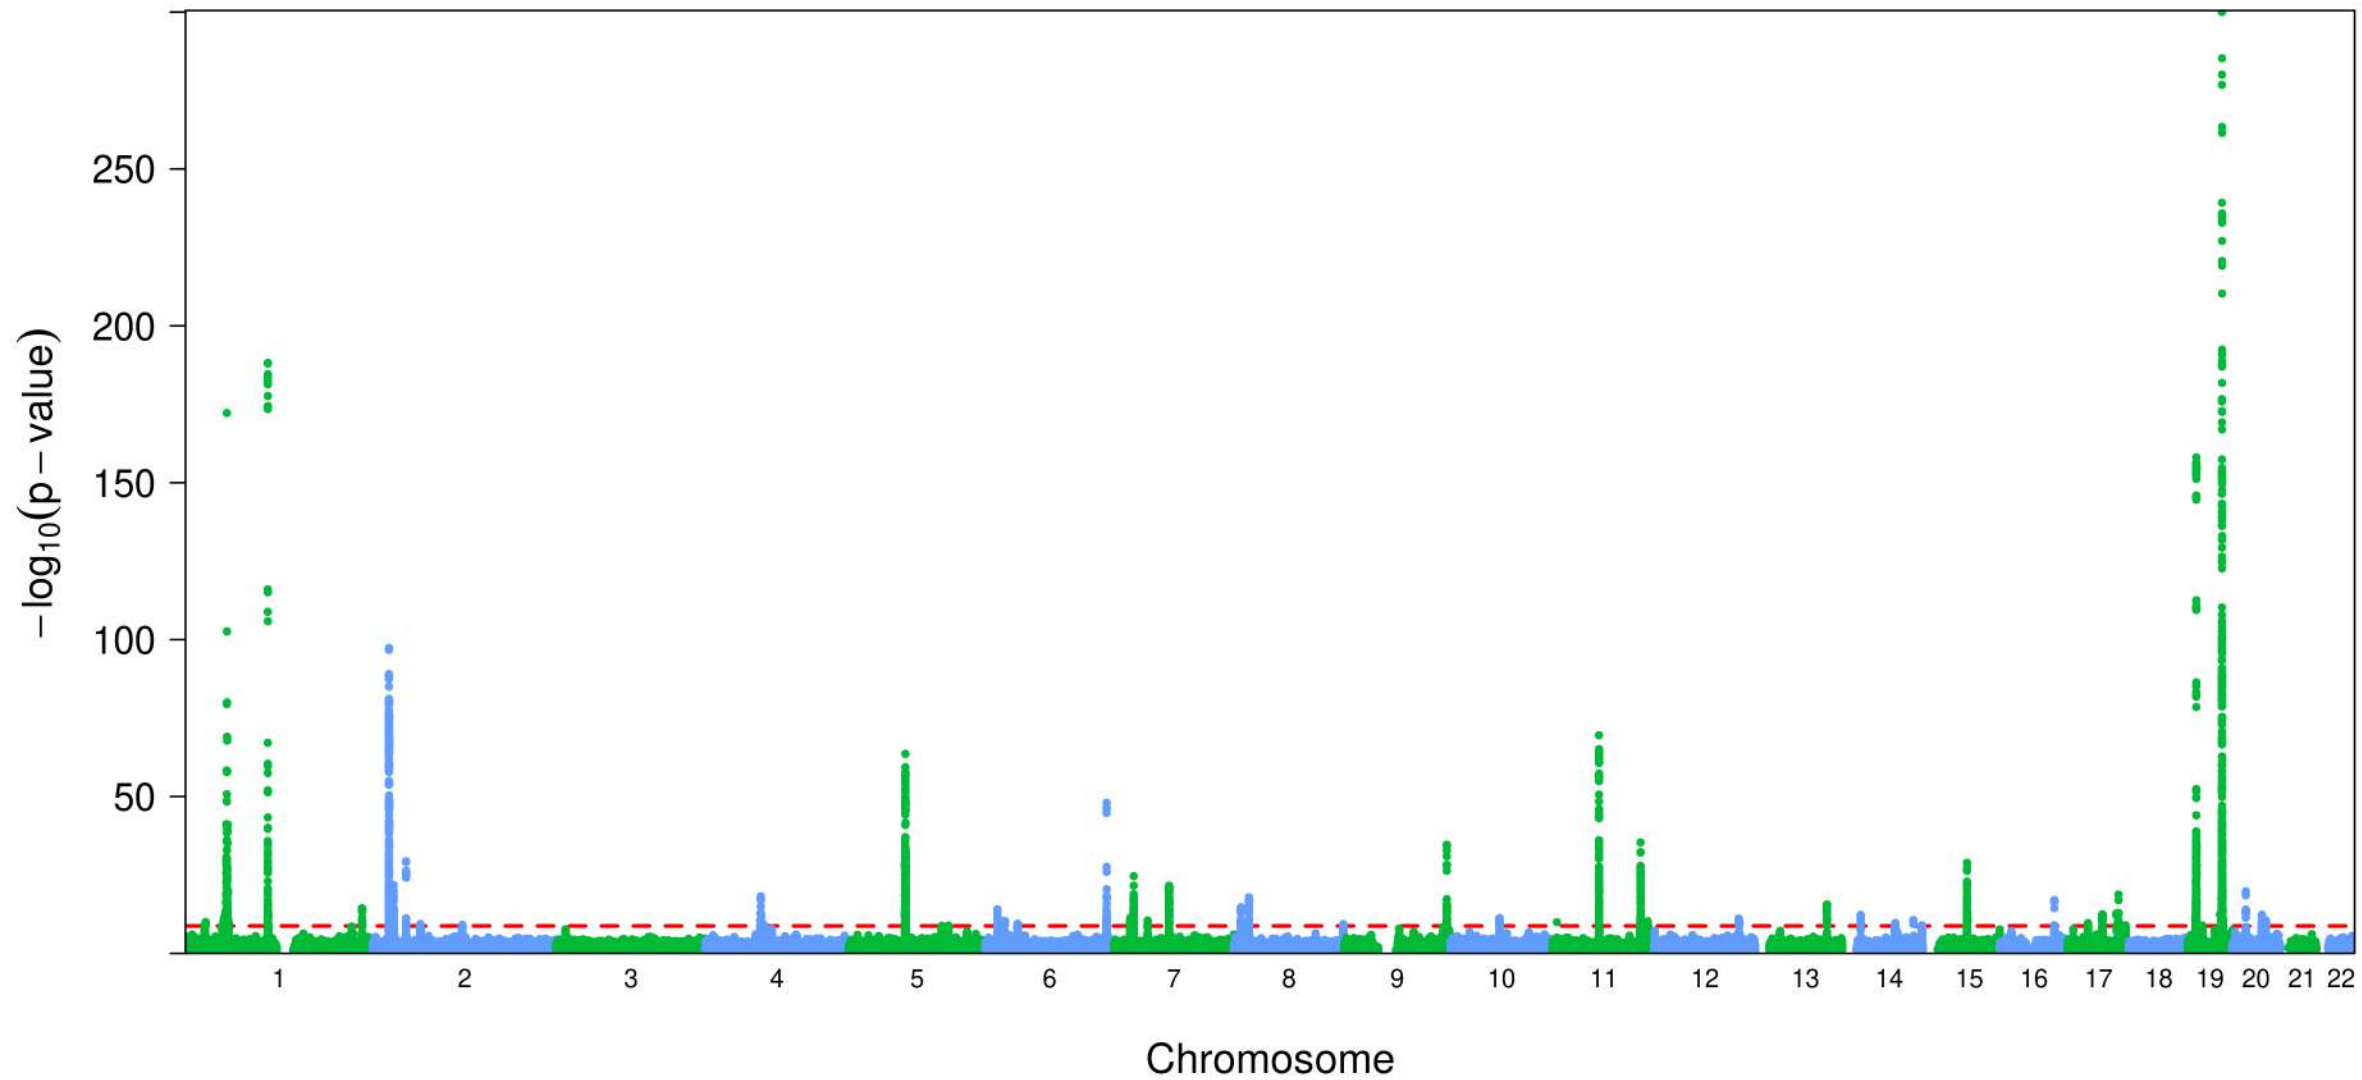

# S-LDL-CE

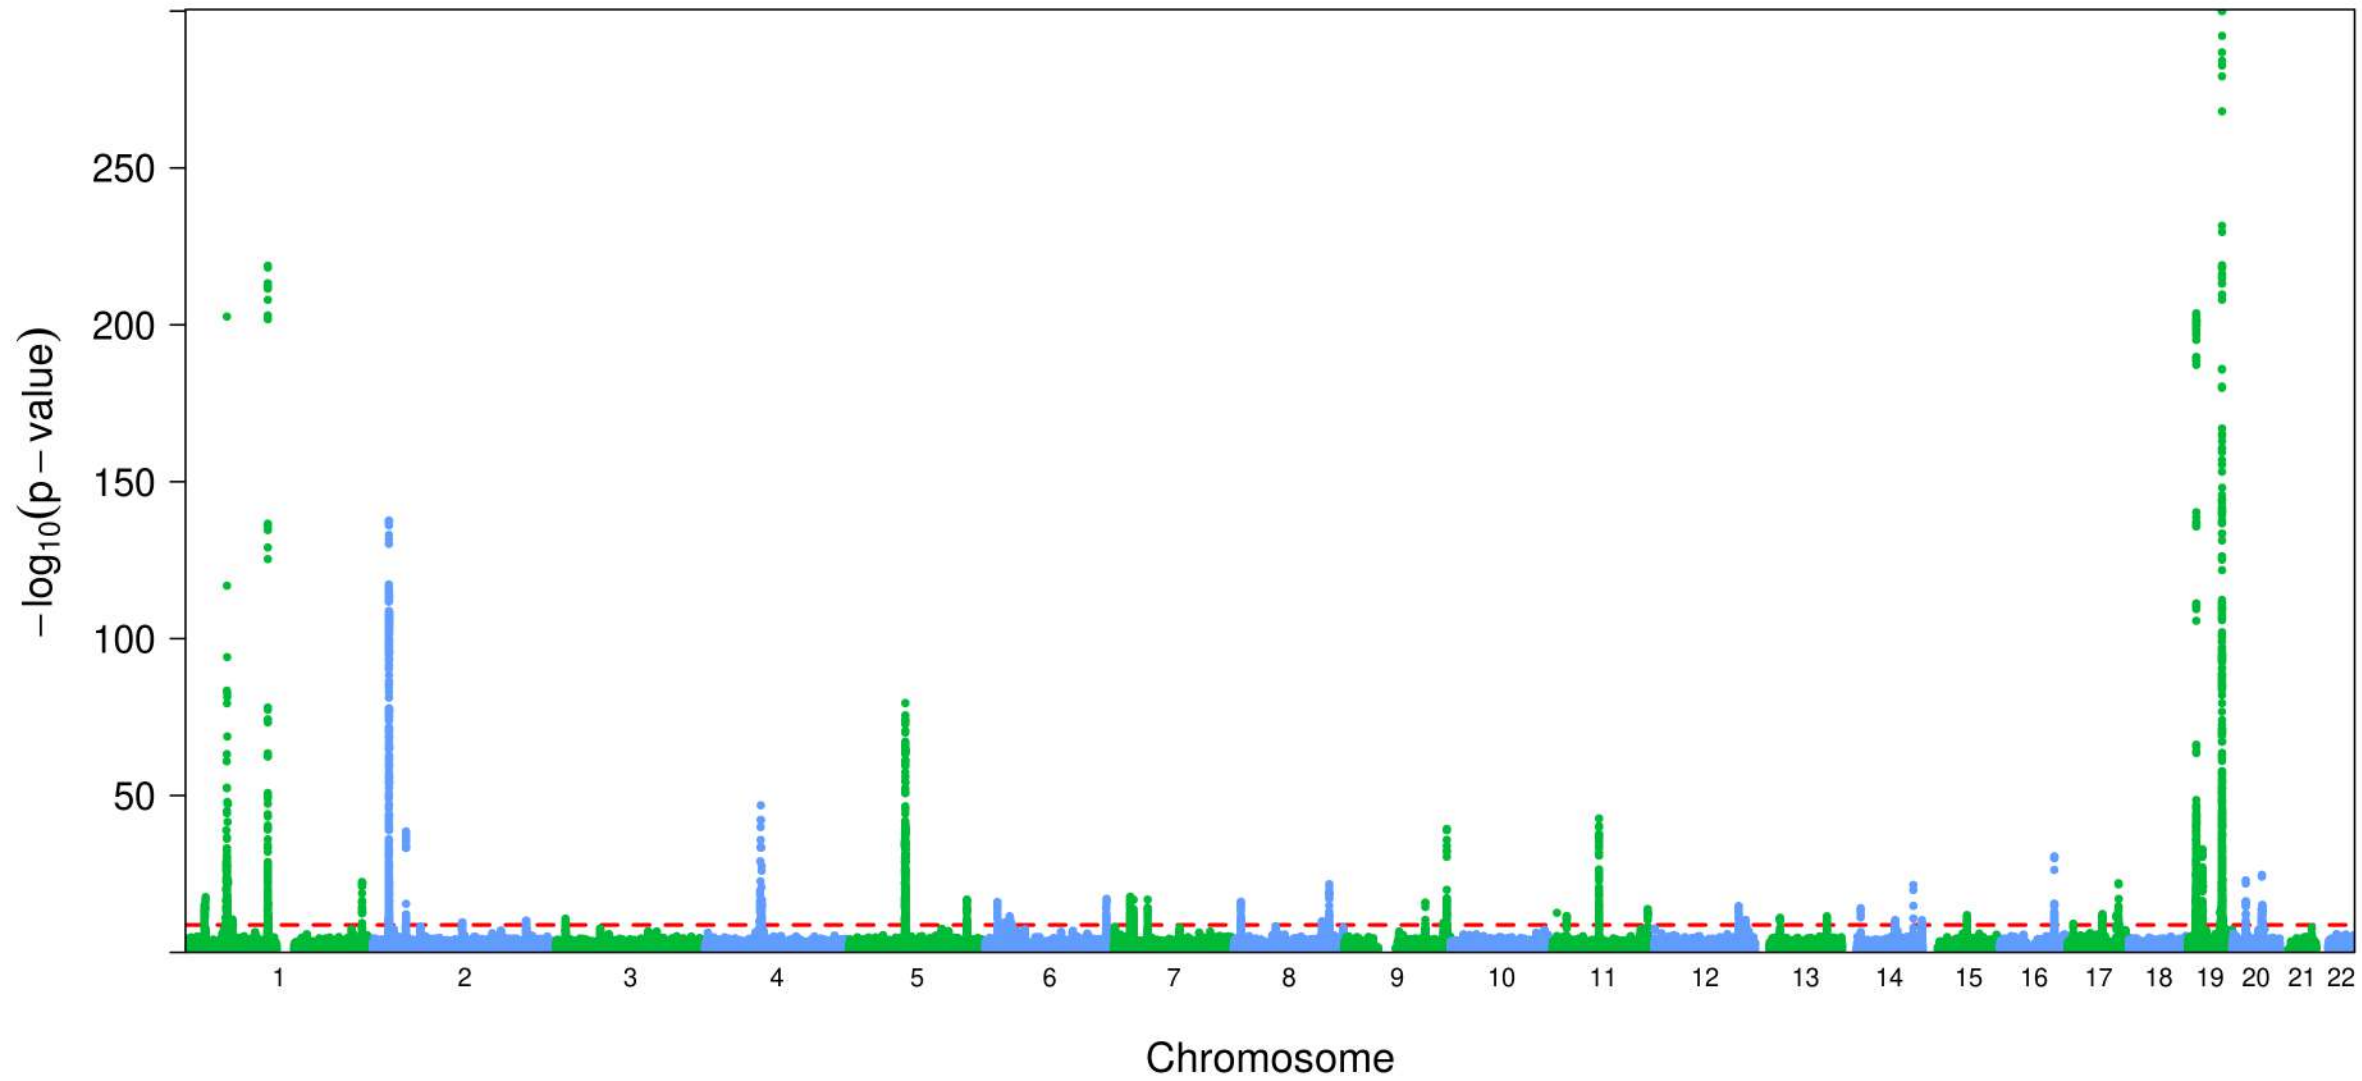

# S-LDL-CE\_percent

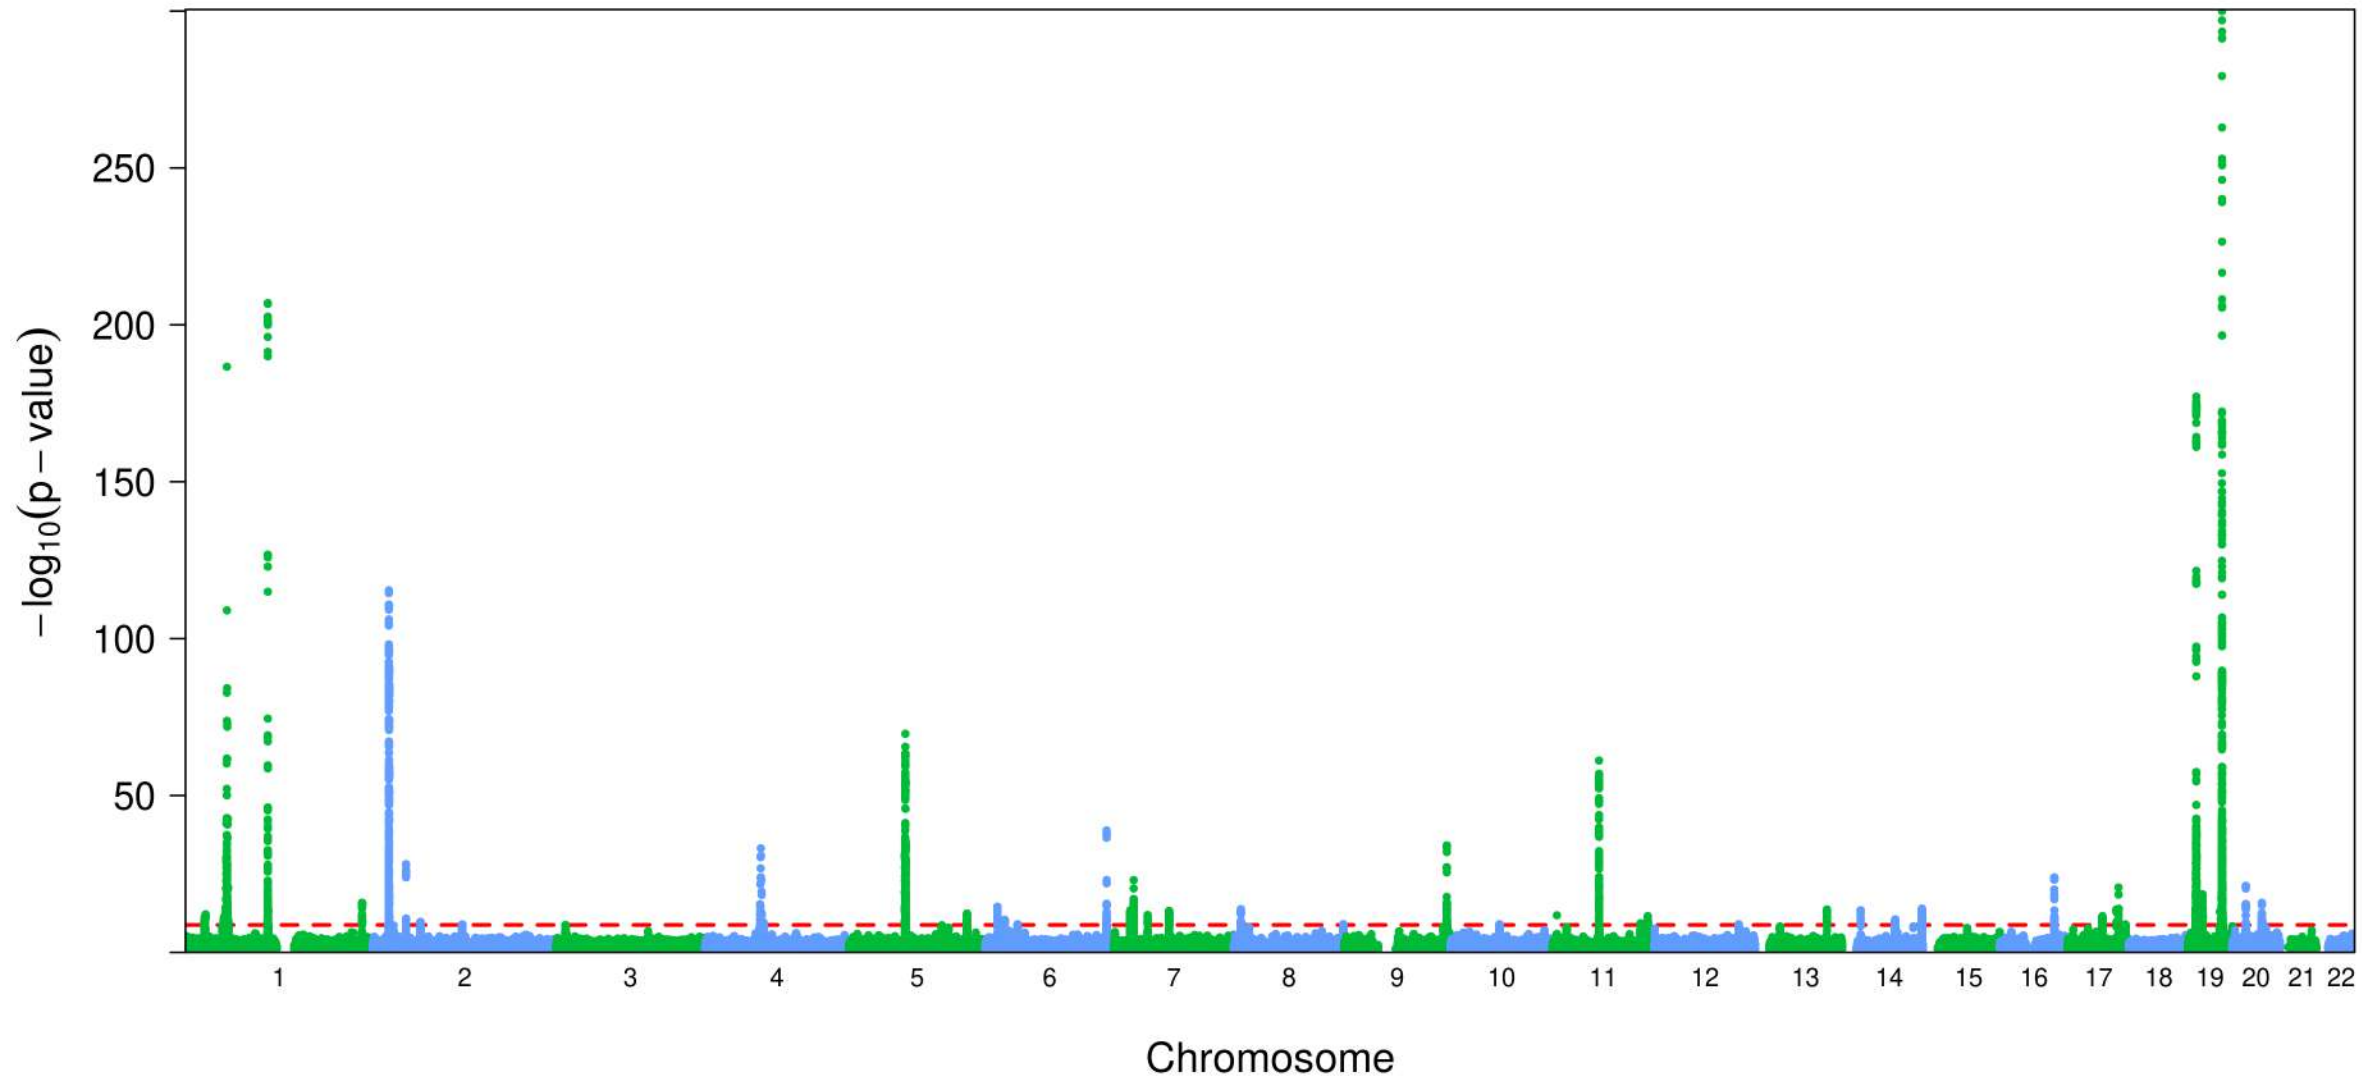

# S-LDL-FC

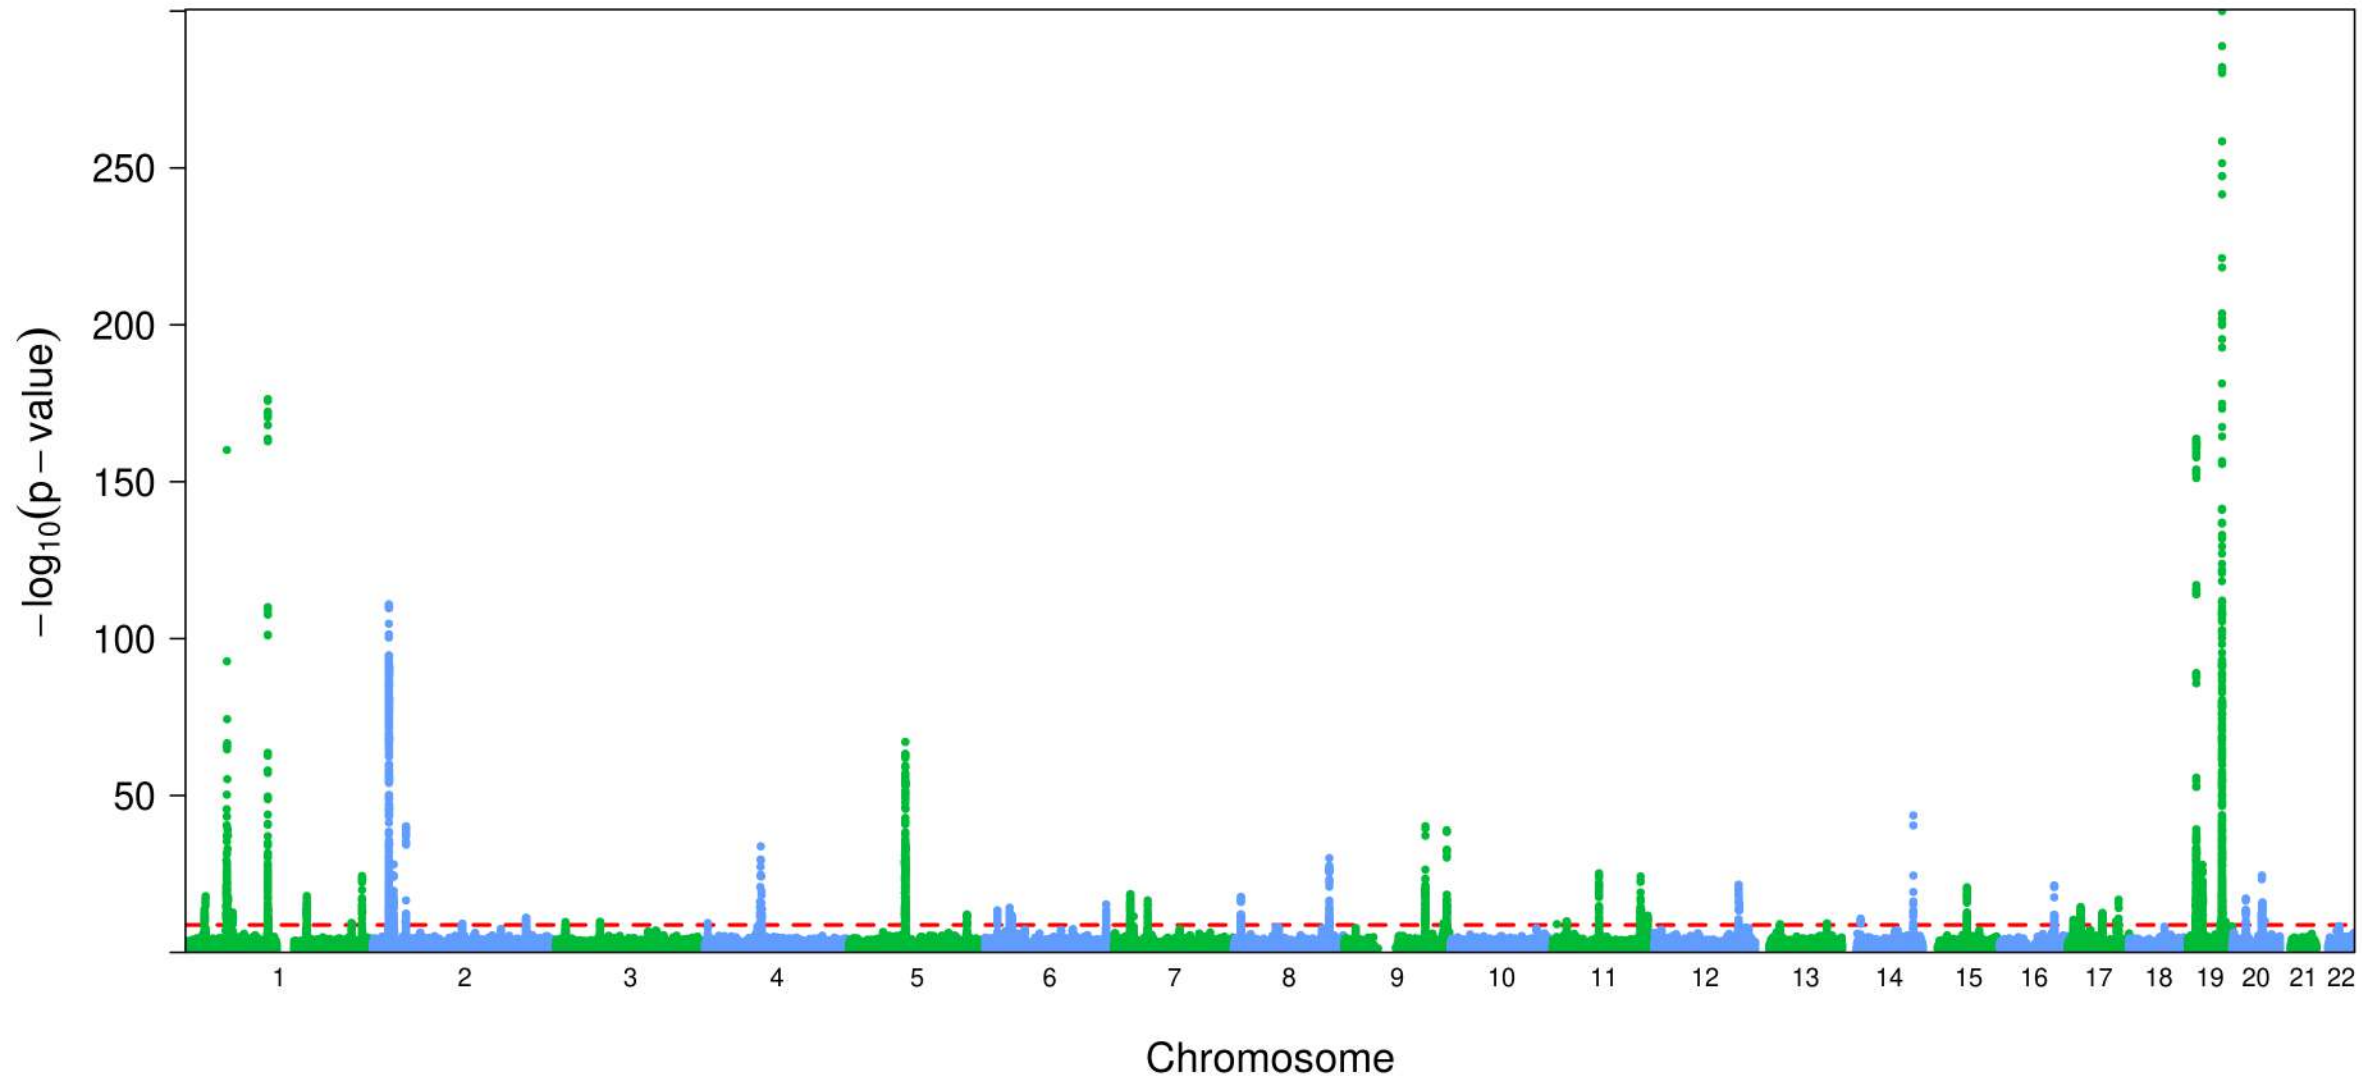

# S-LDL-FC\_percent

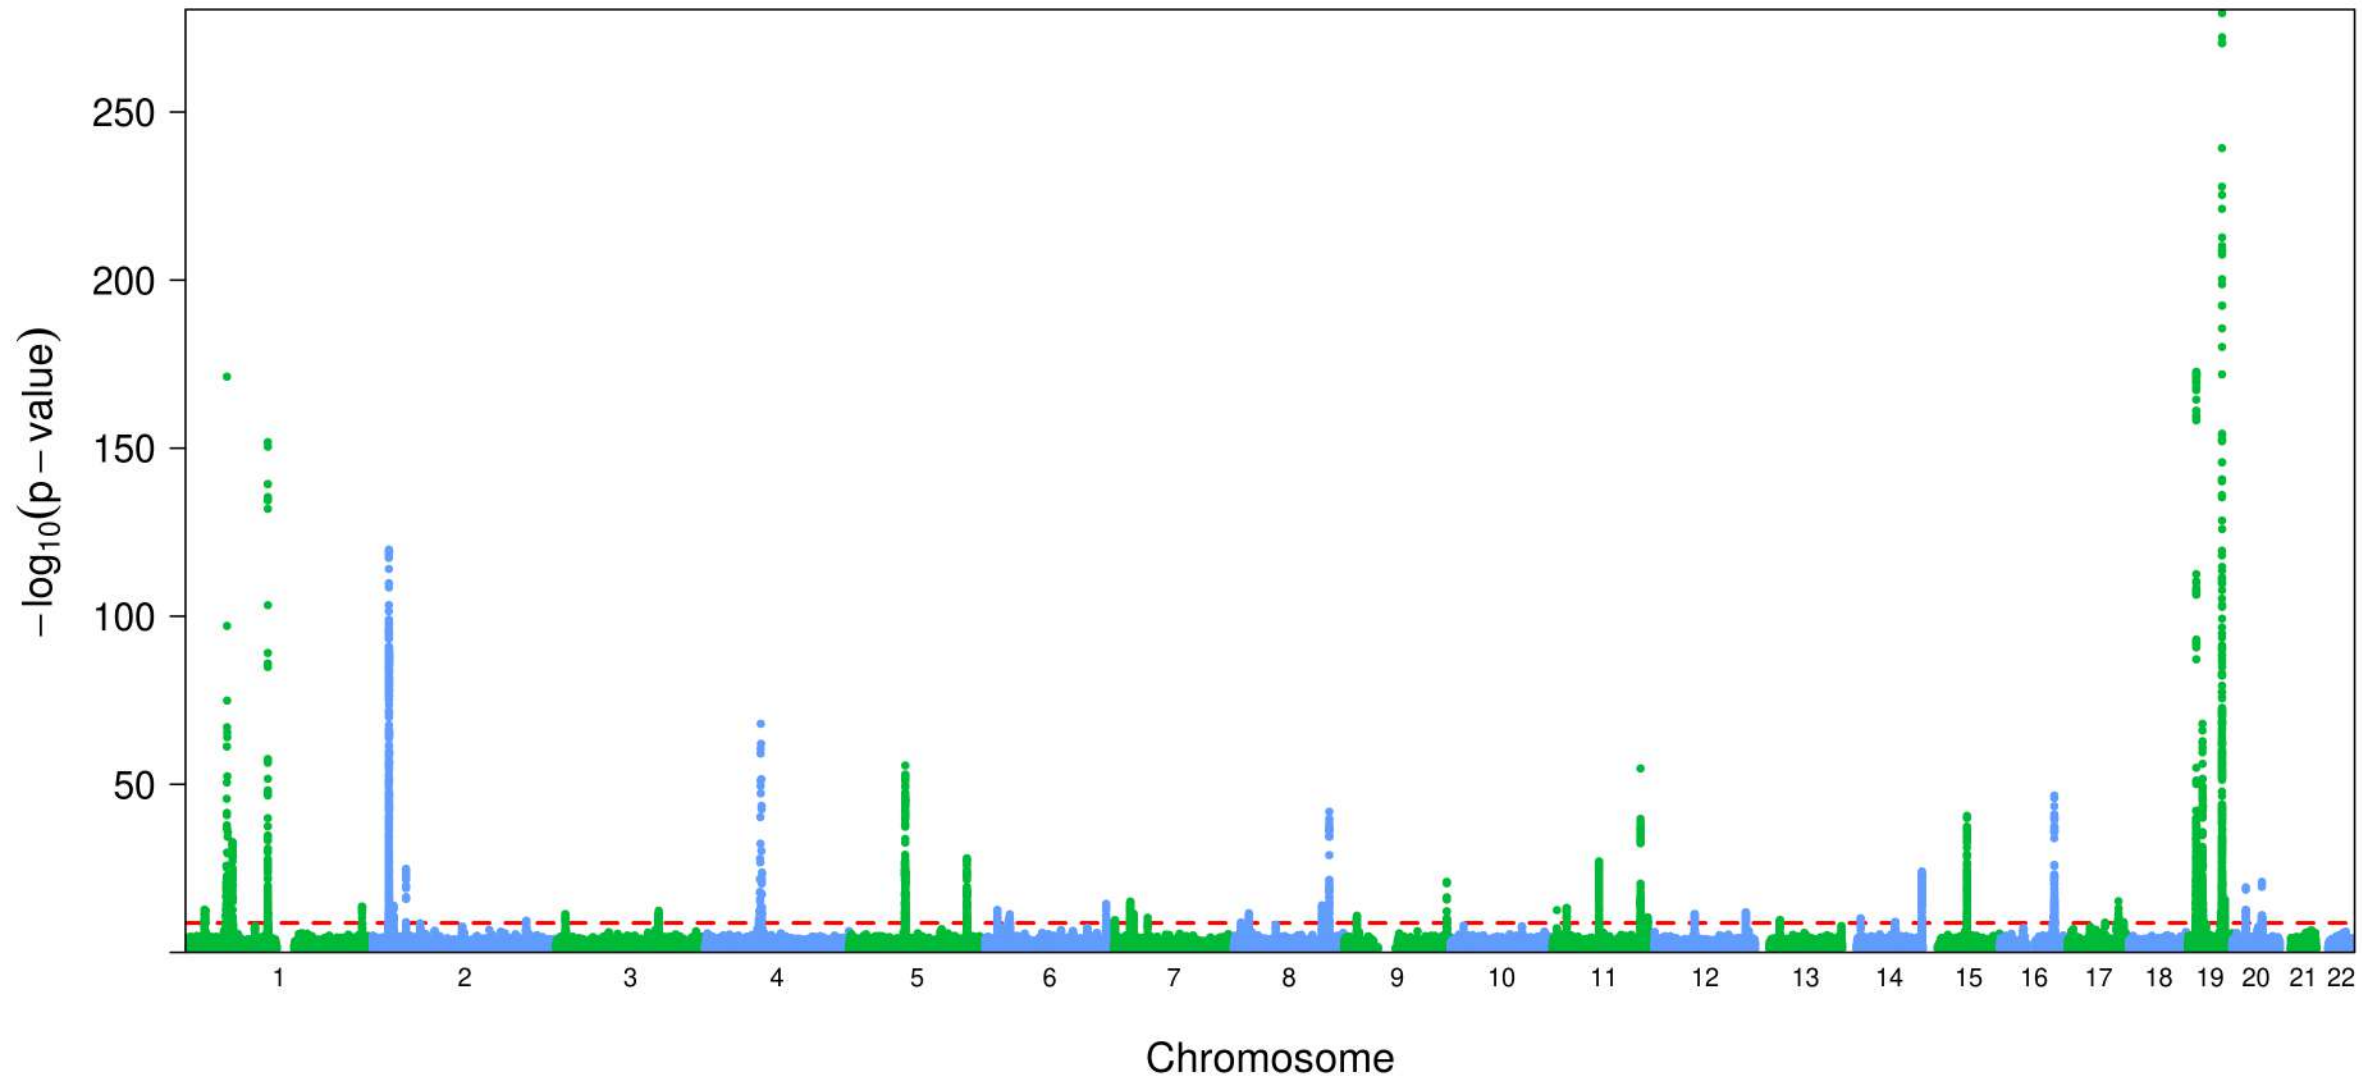



# S-LDL-L

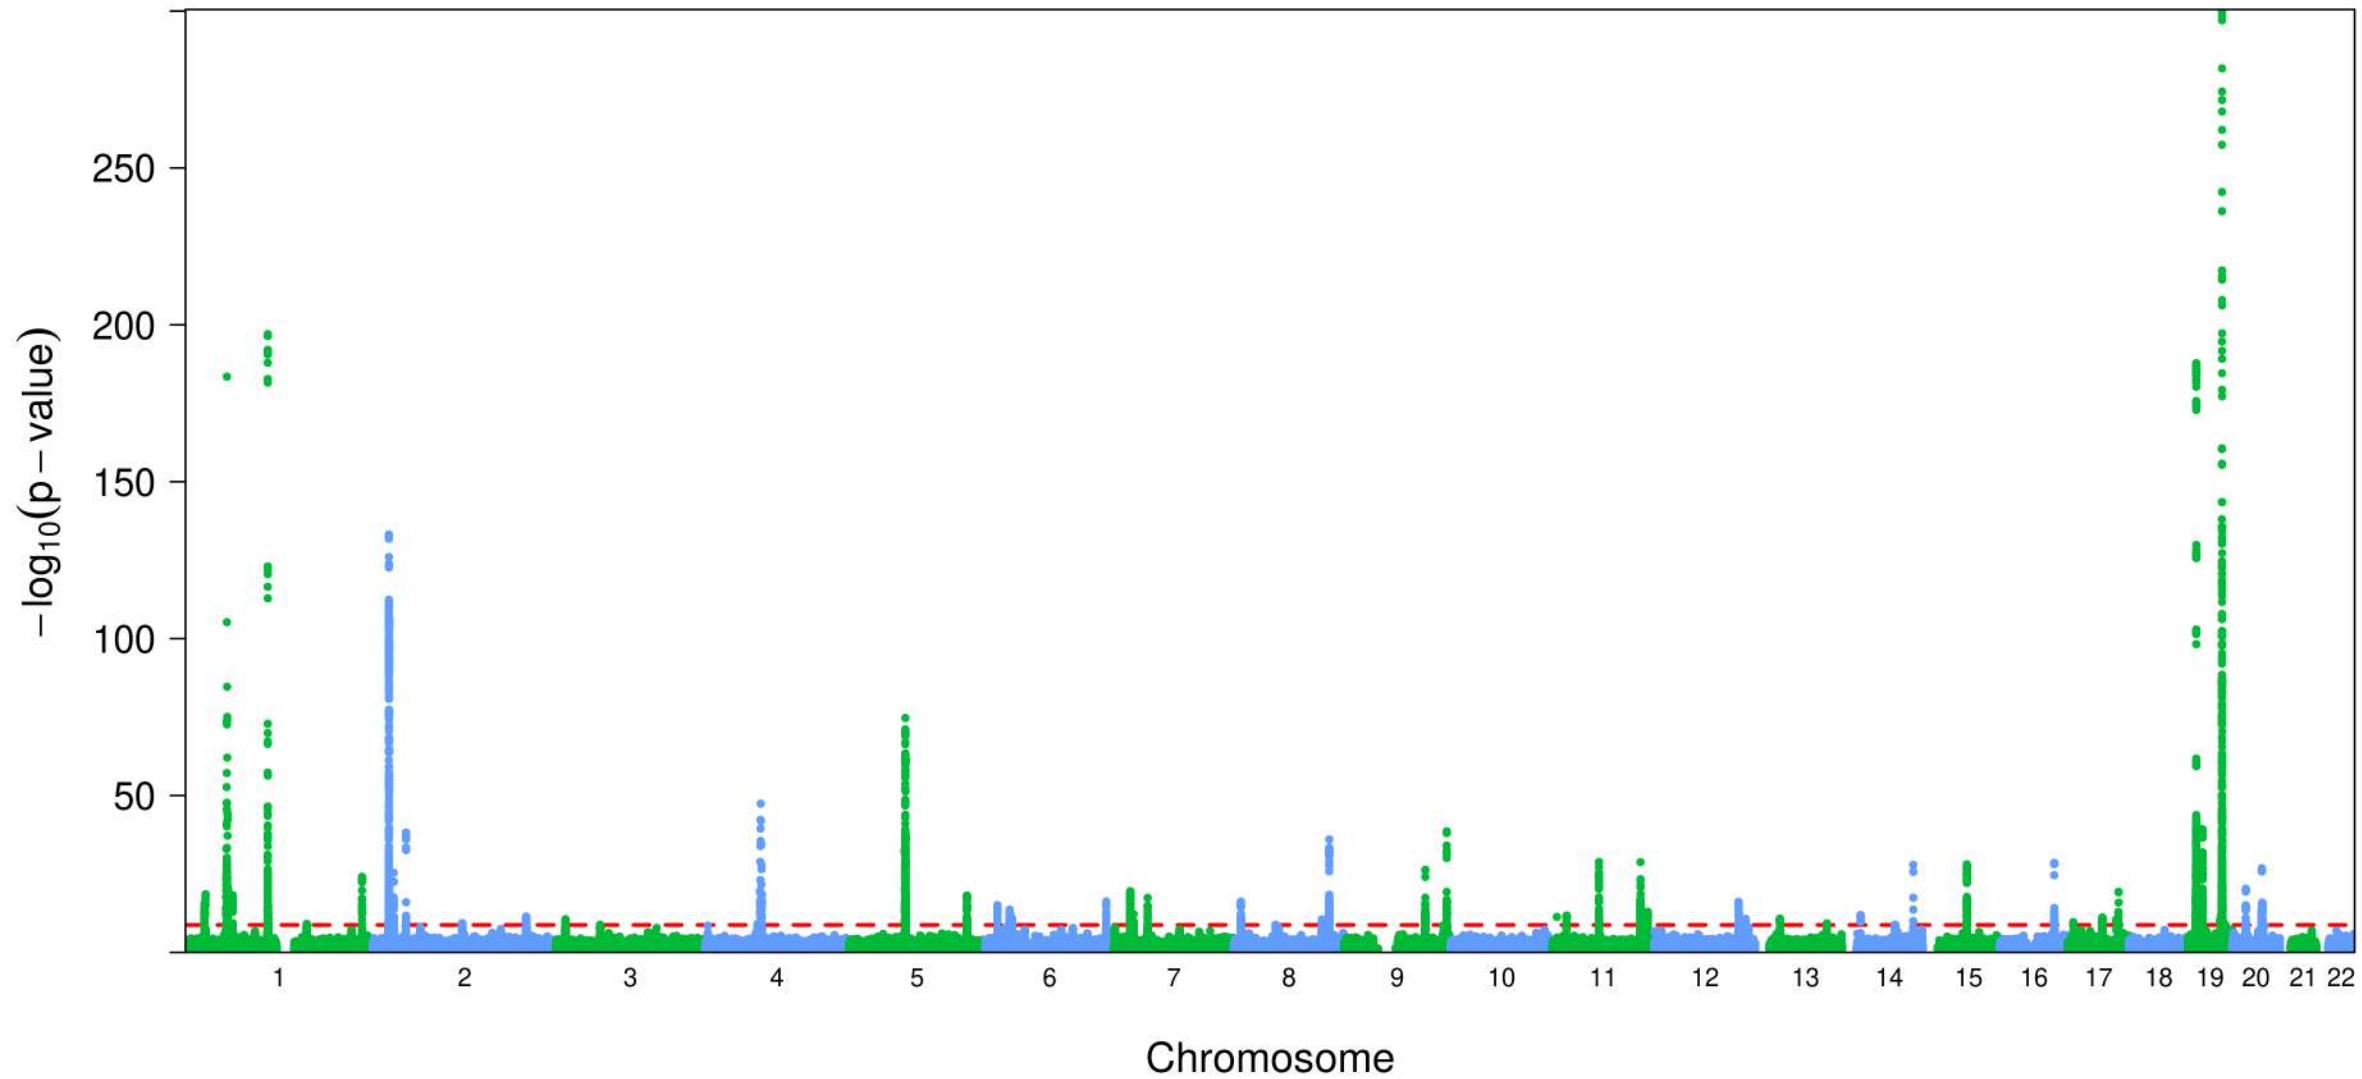

# S-LDL-P

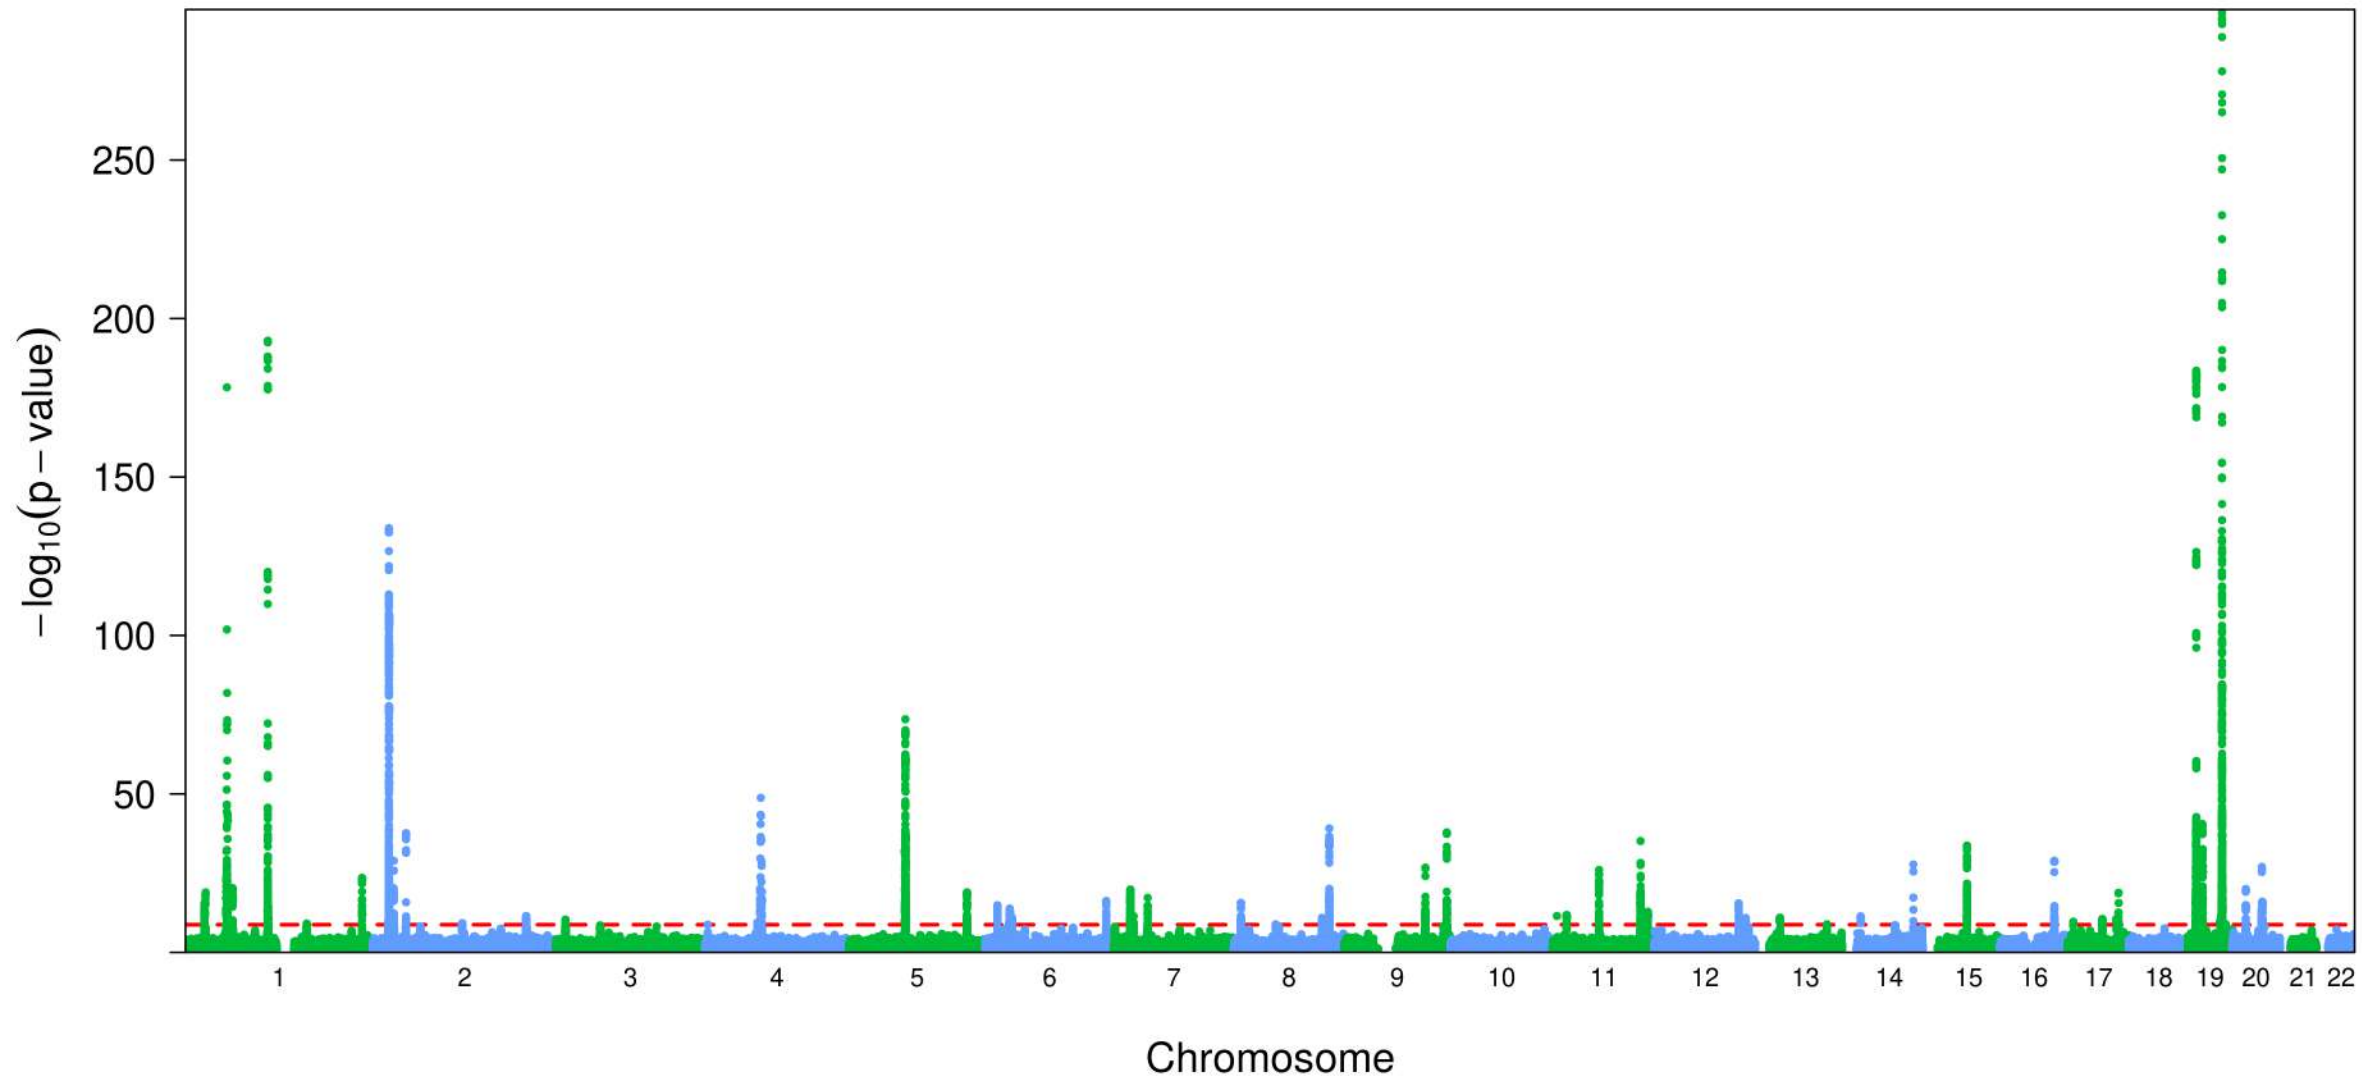

# S-LDL-PL

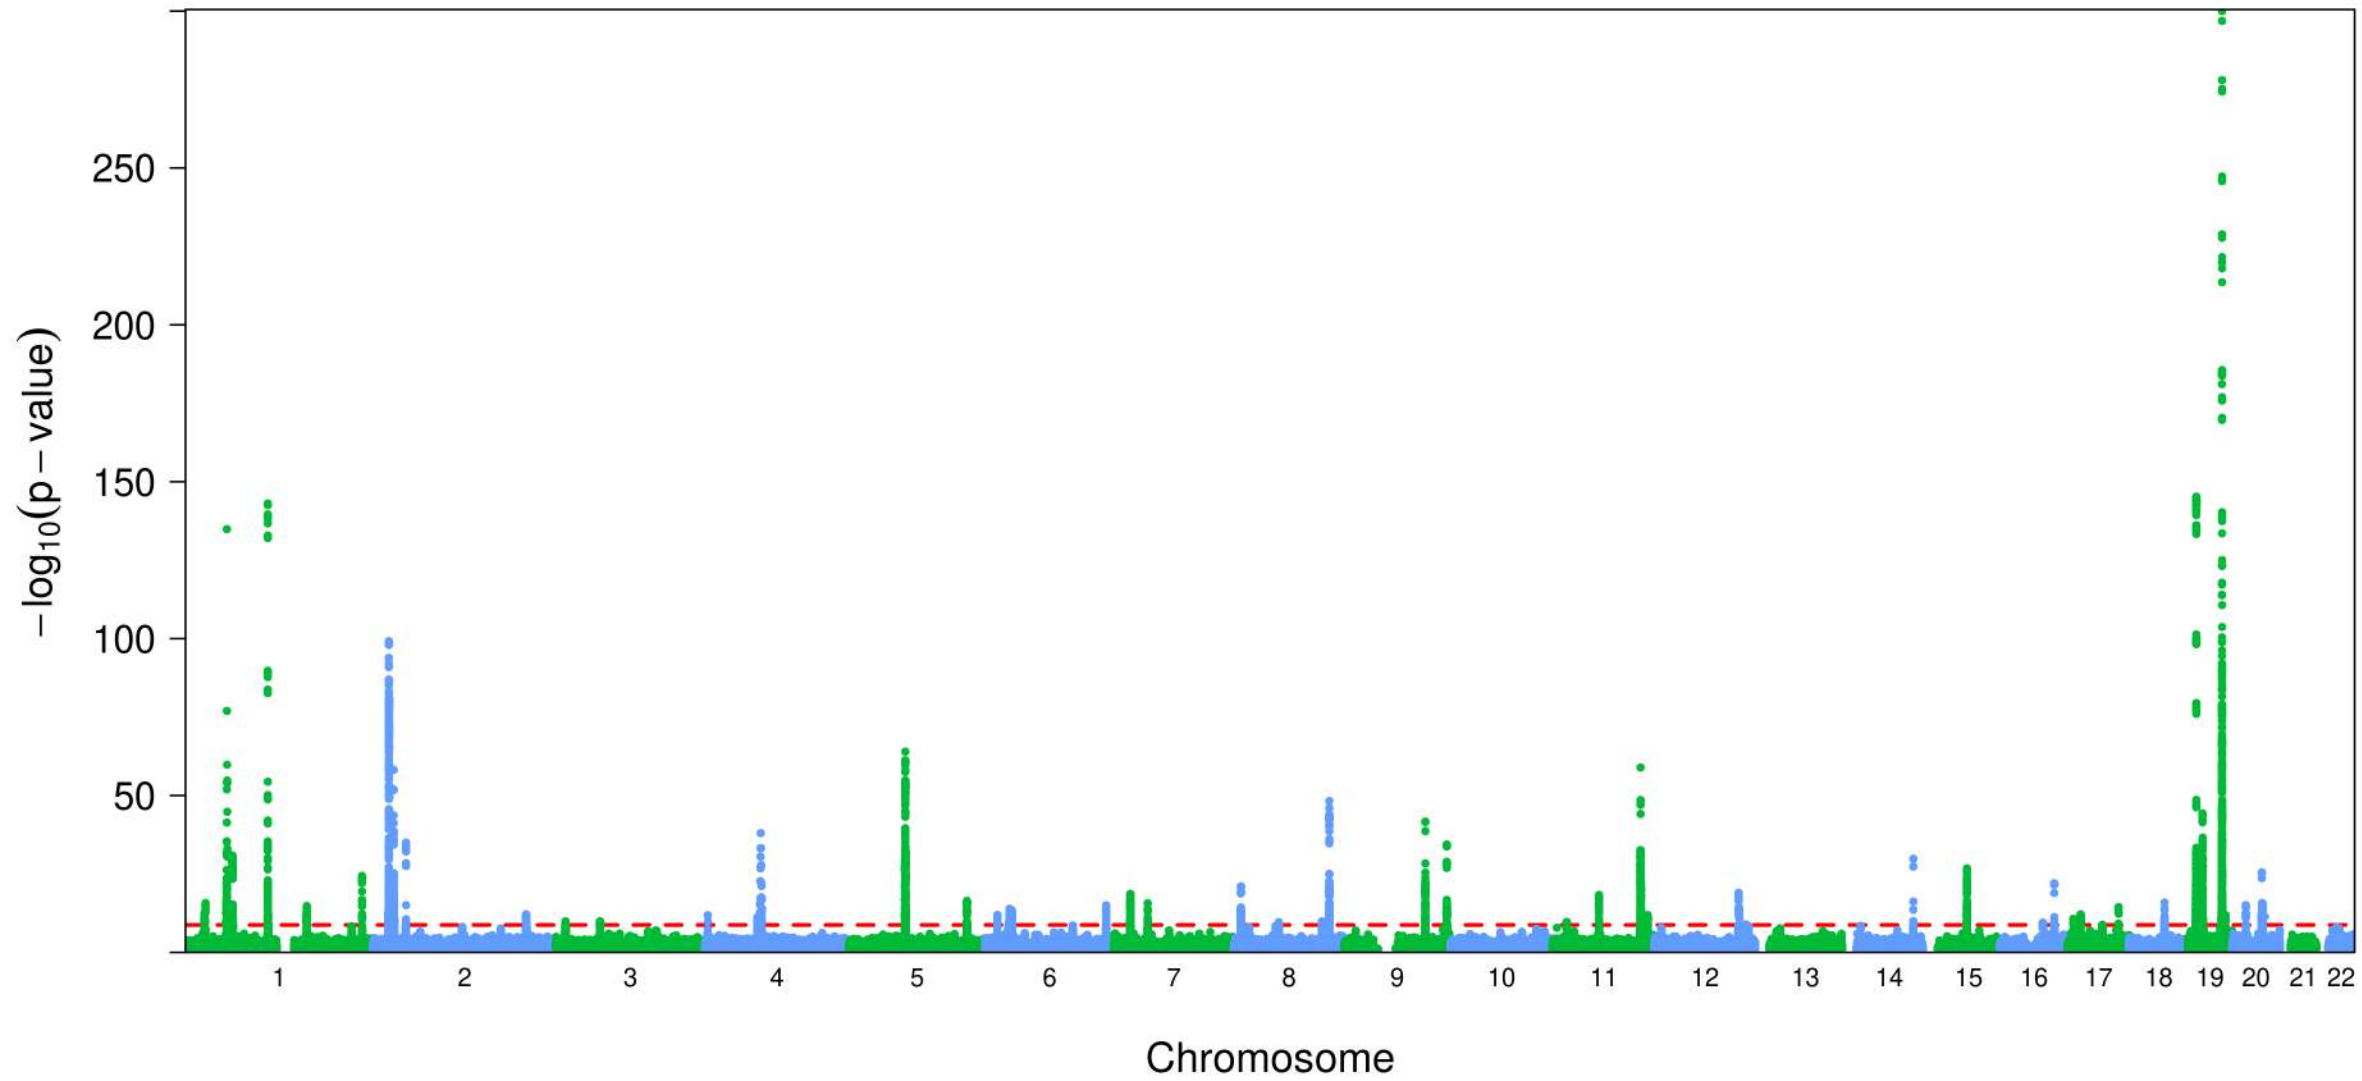

# S-LDL-PL\_percent

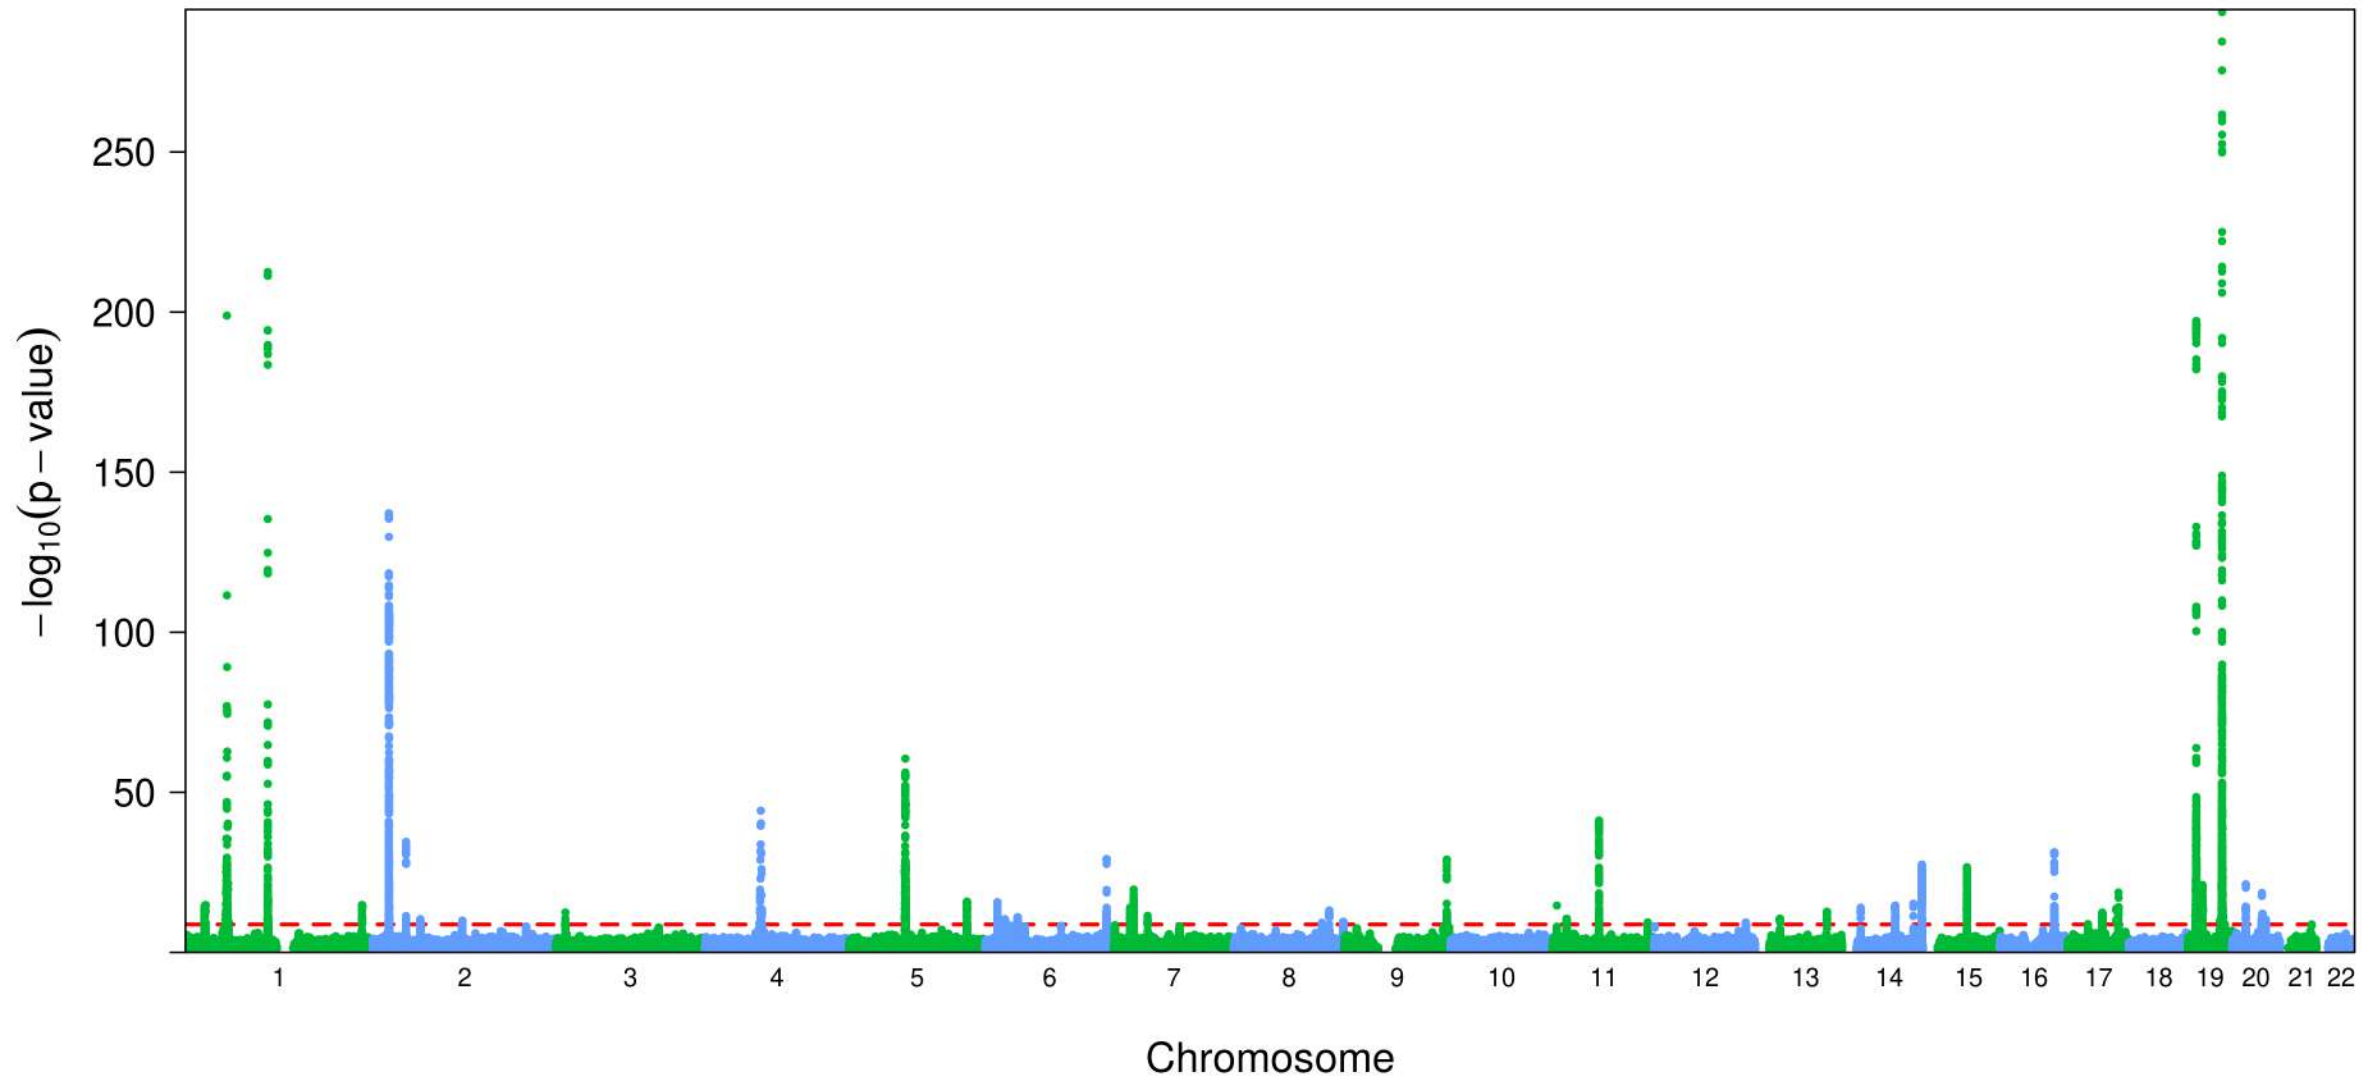

# S-LDL-TG

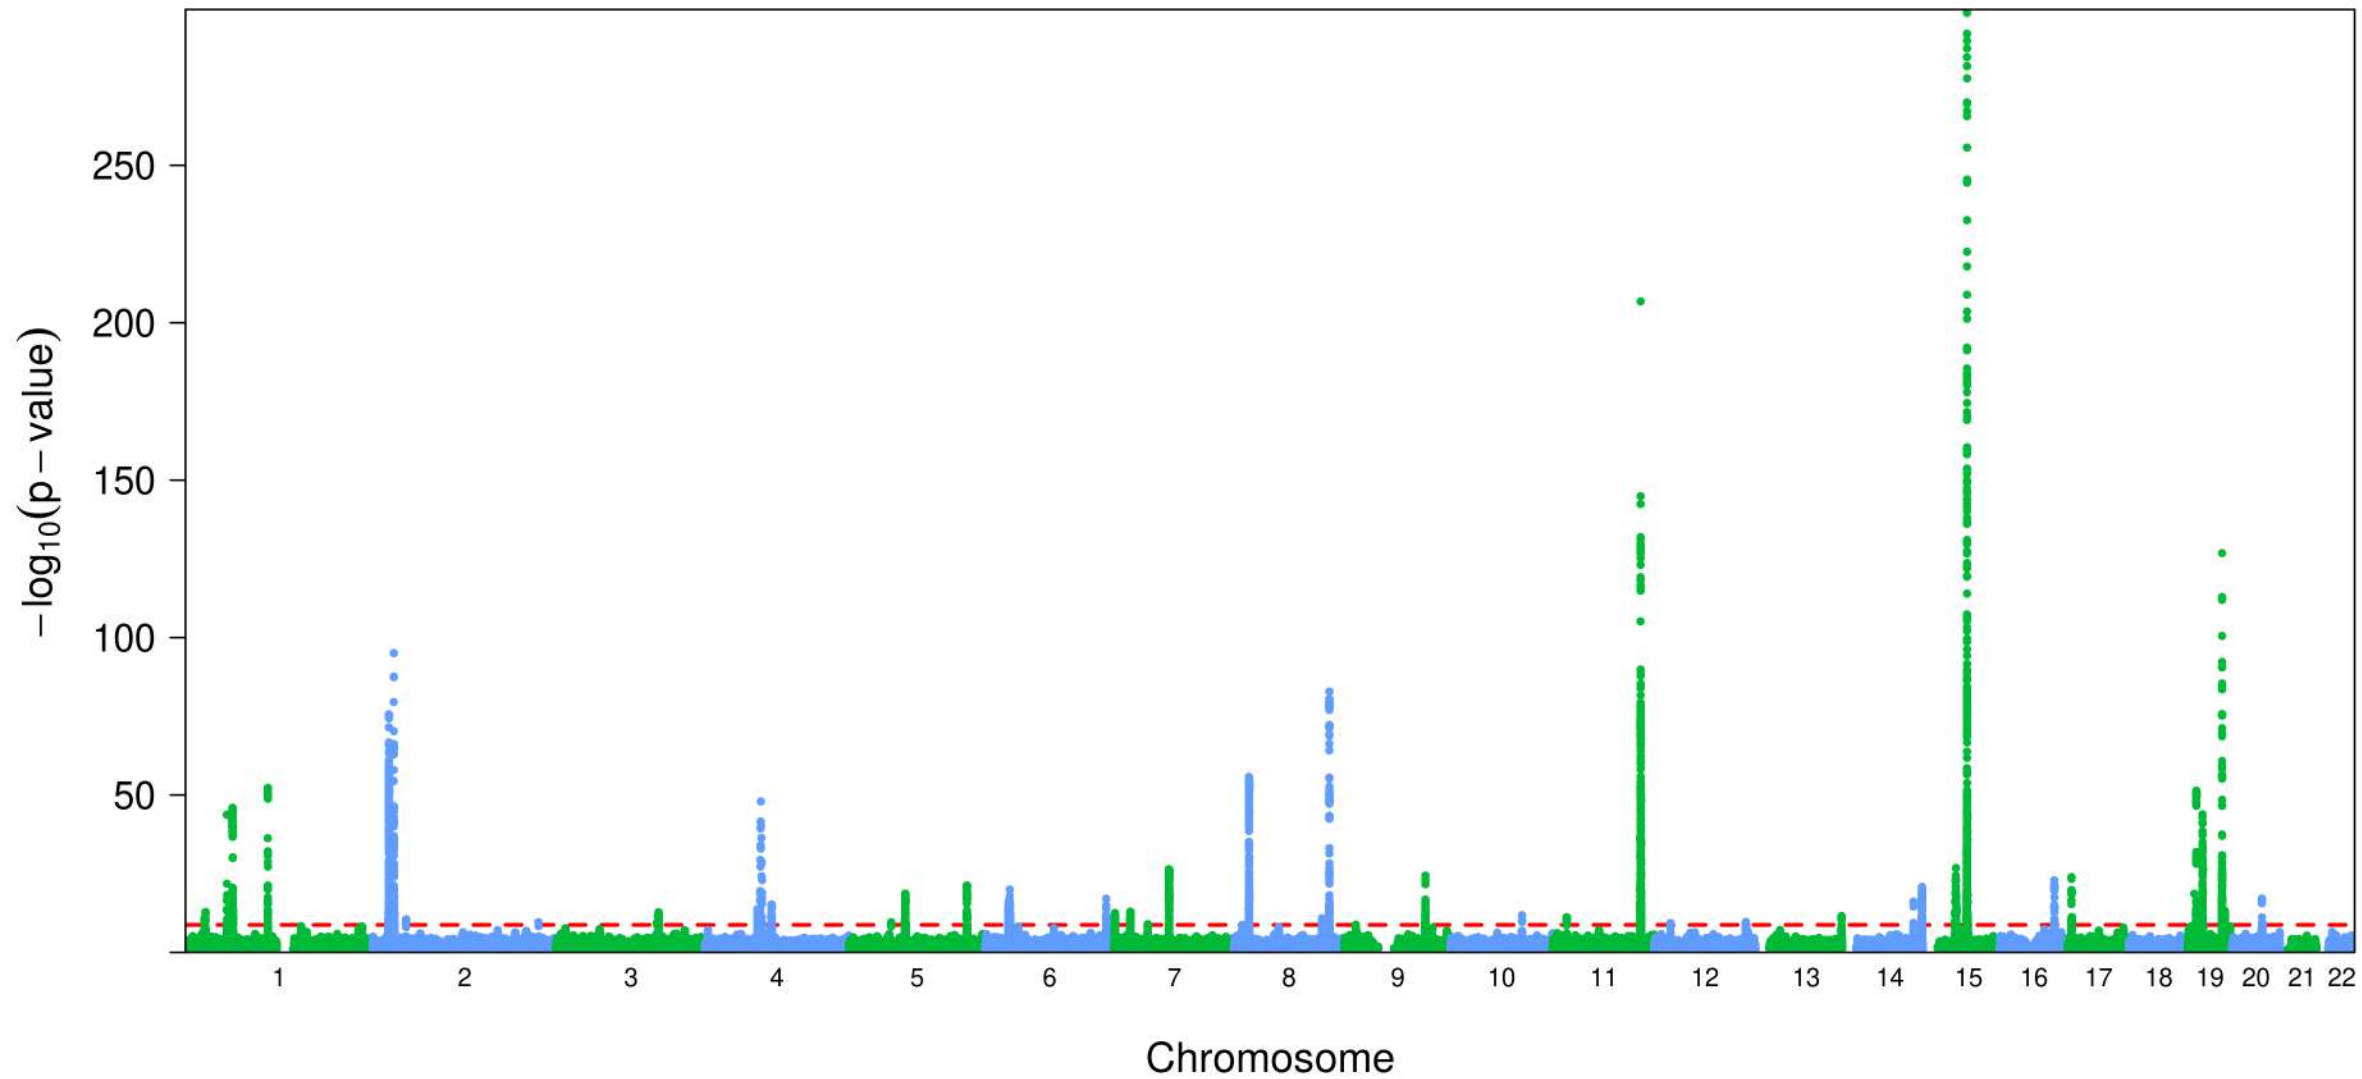

# S-LDL-TG\_percent

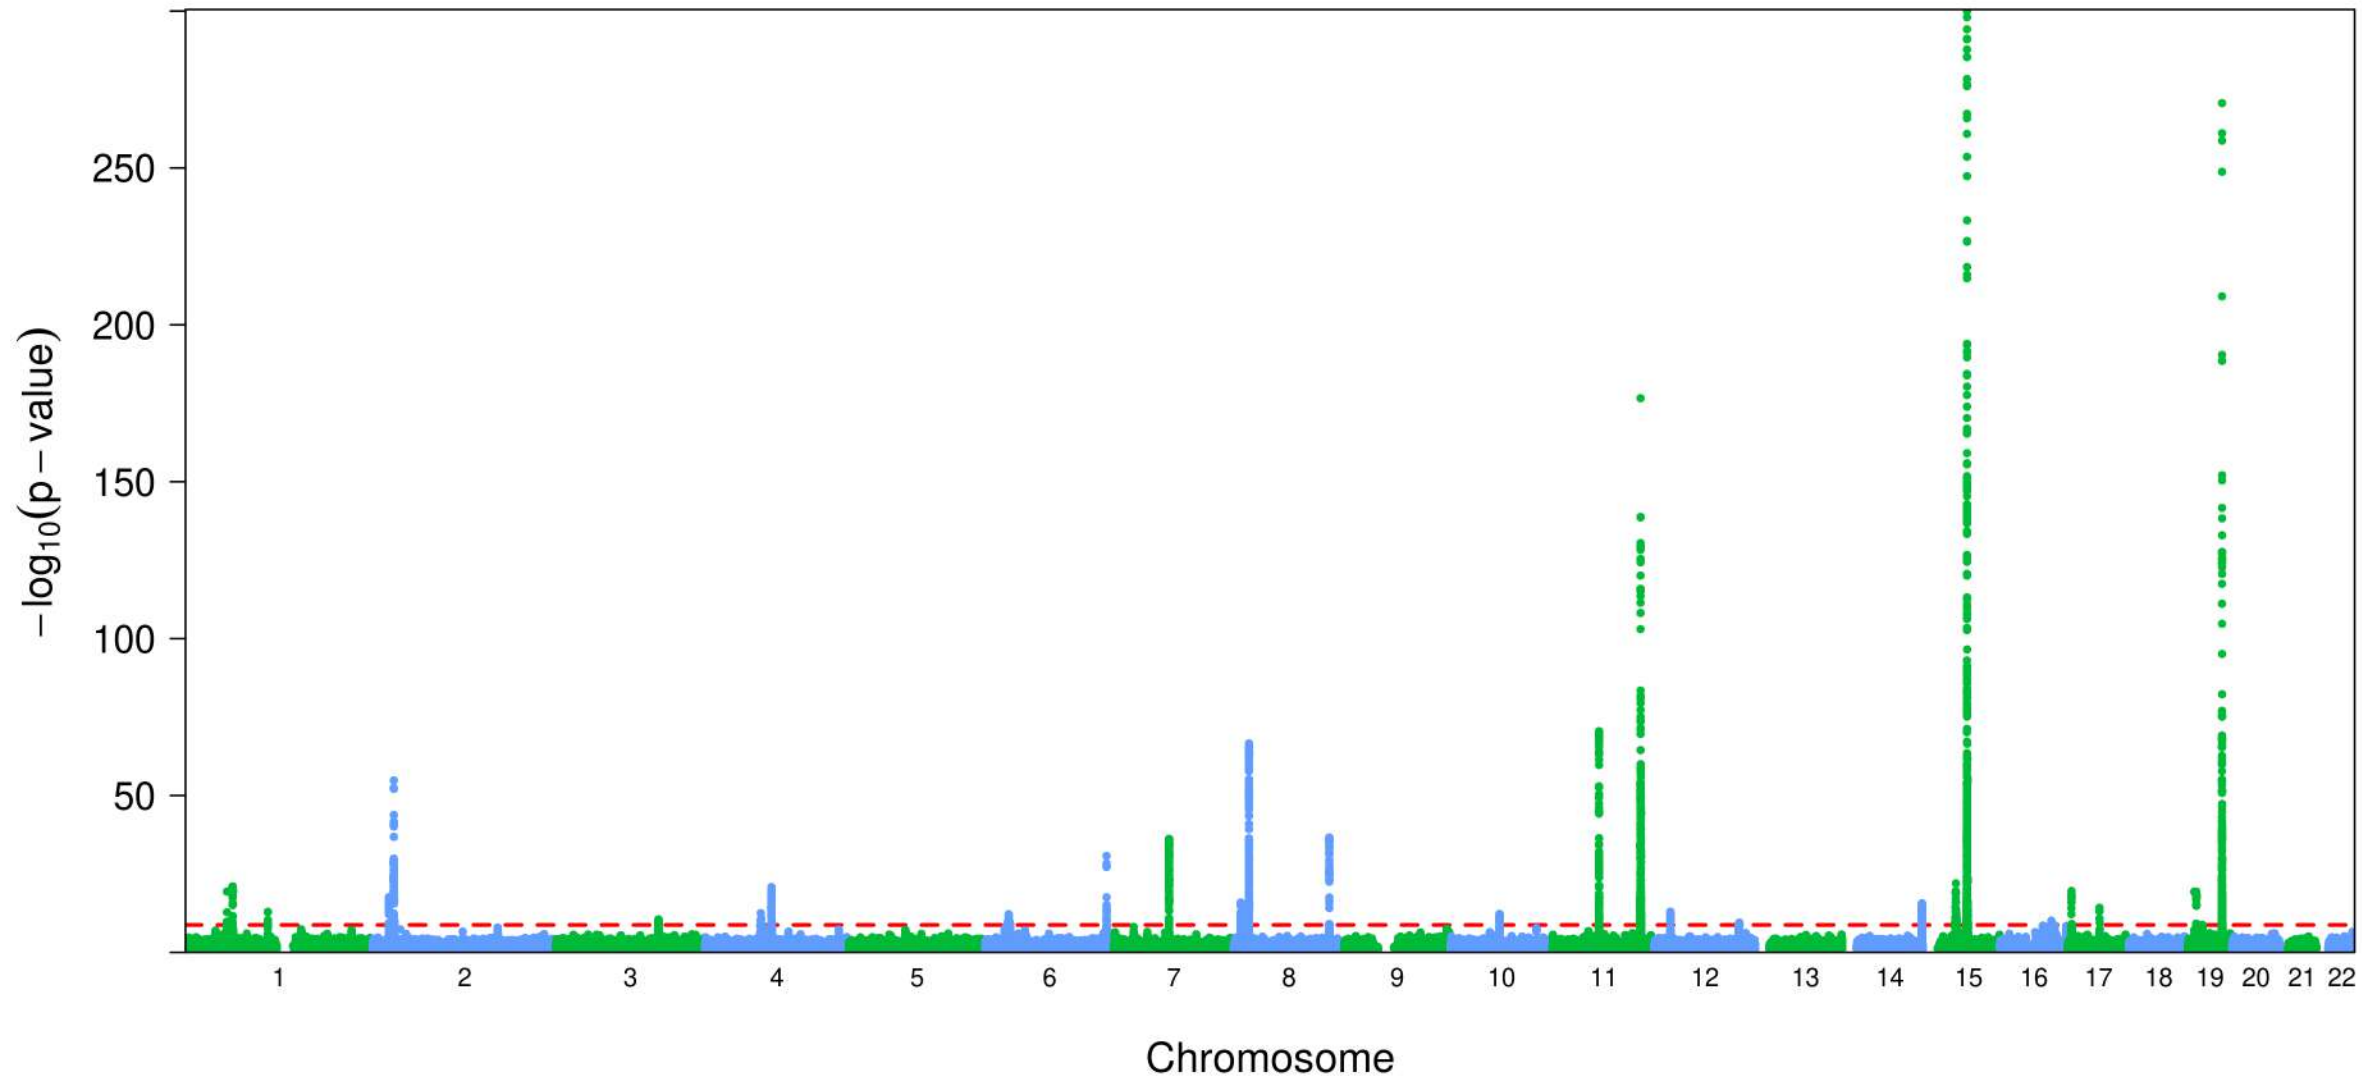

# S-VLDL-C

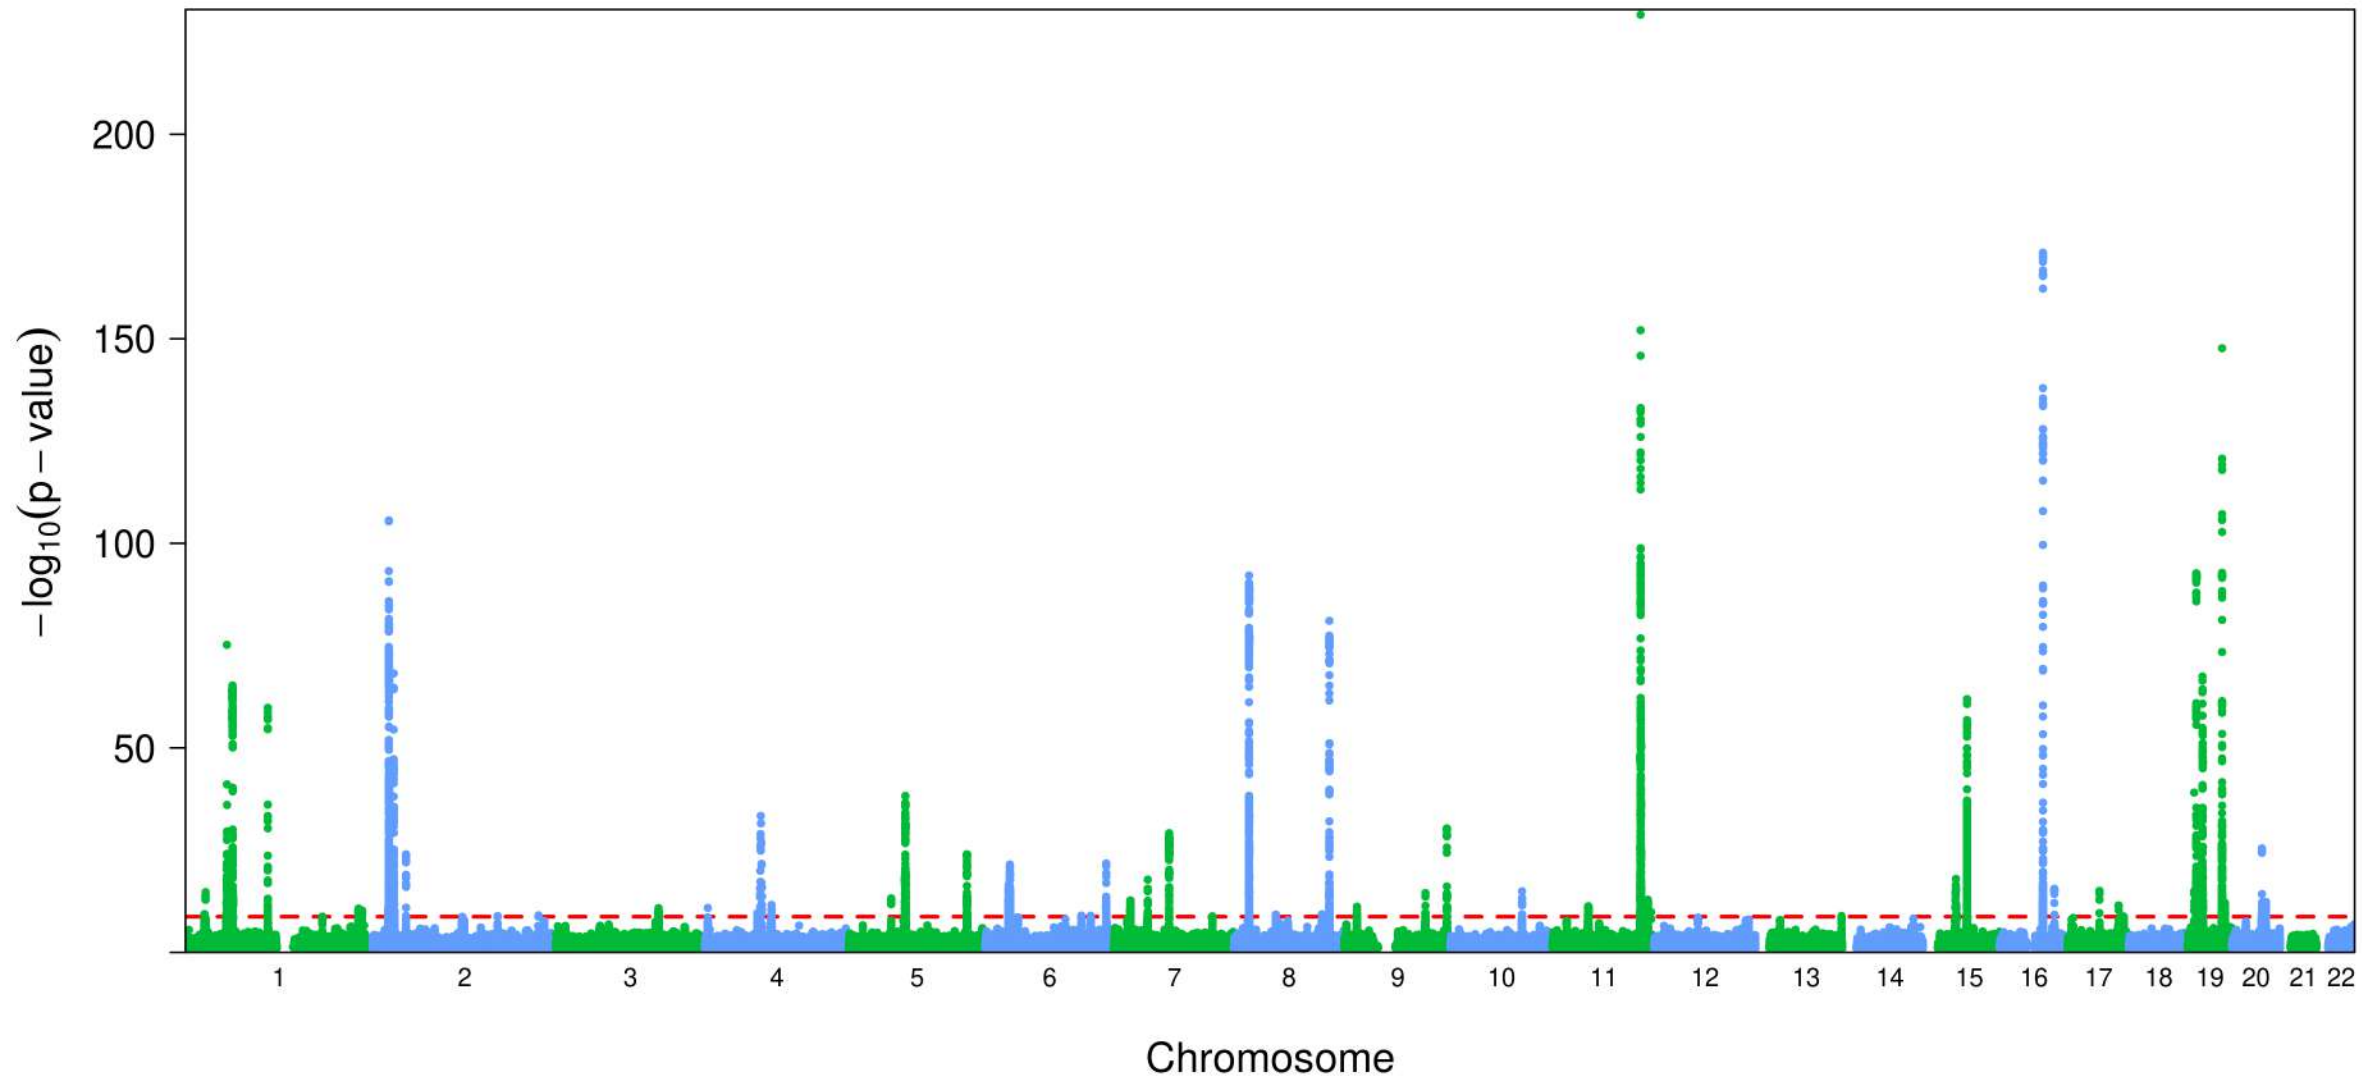

# S-VLDL-C\_percent

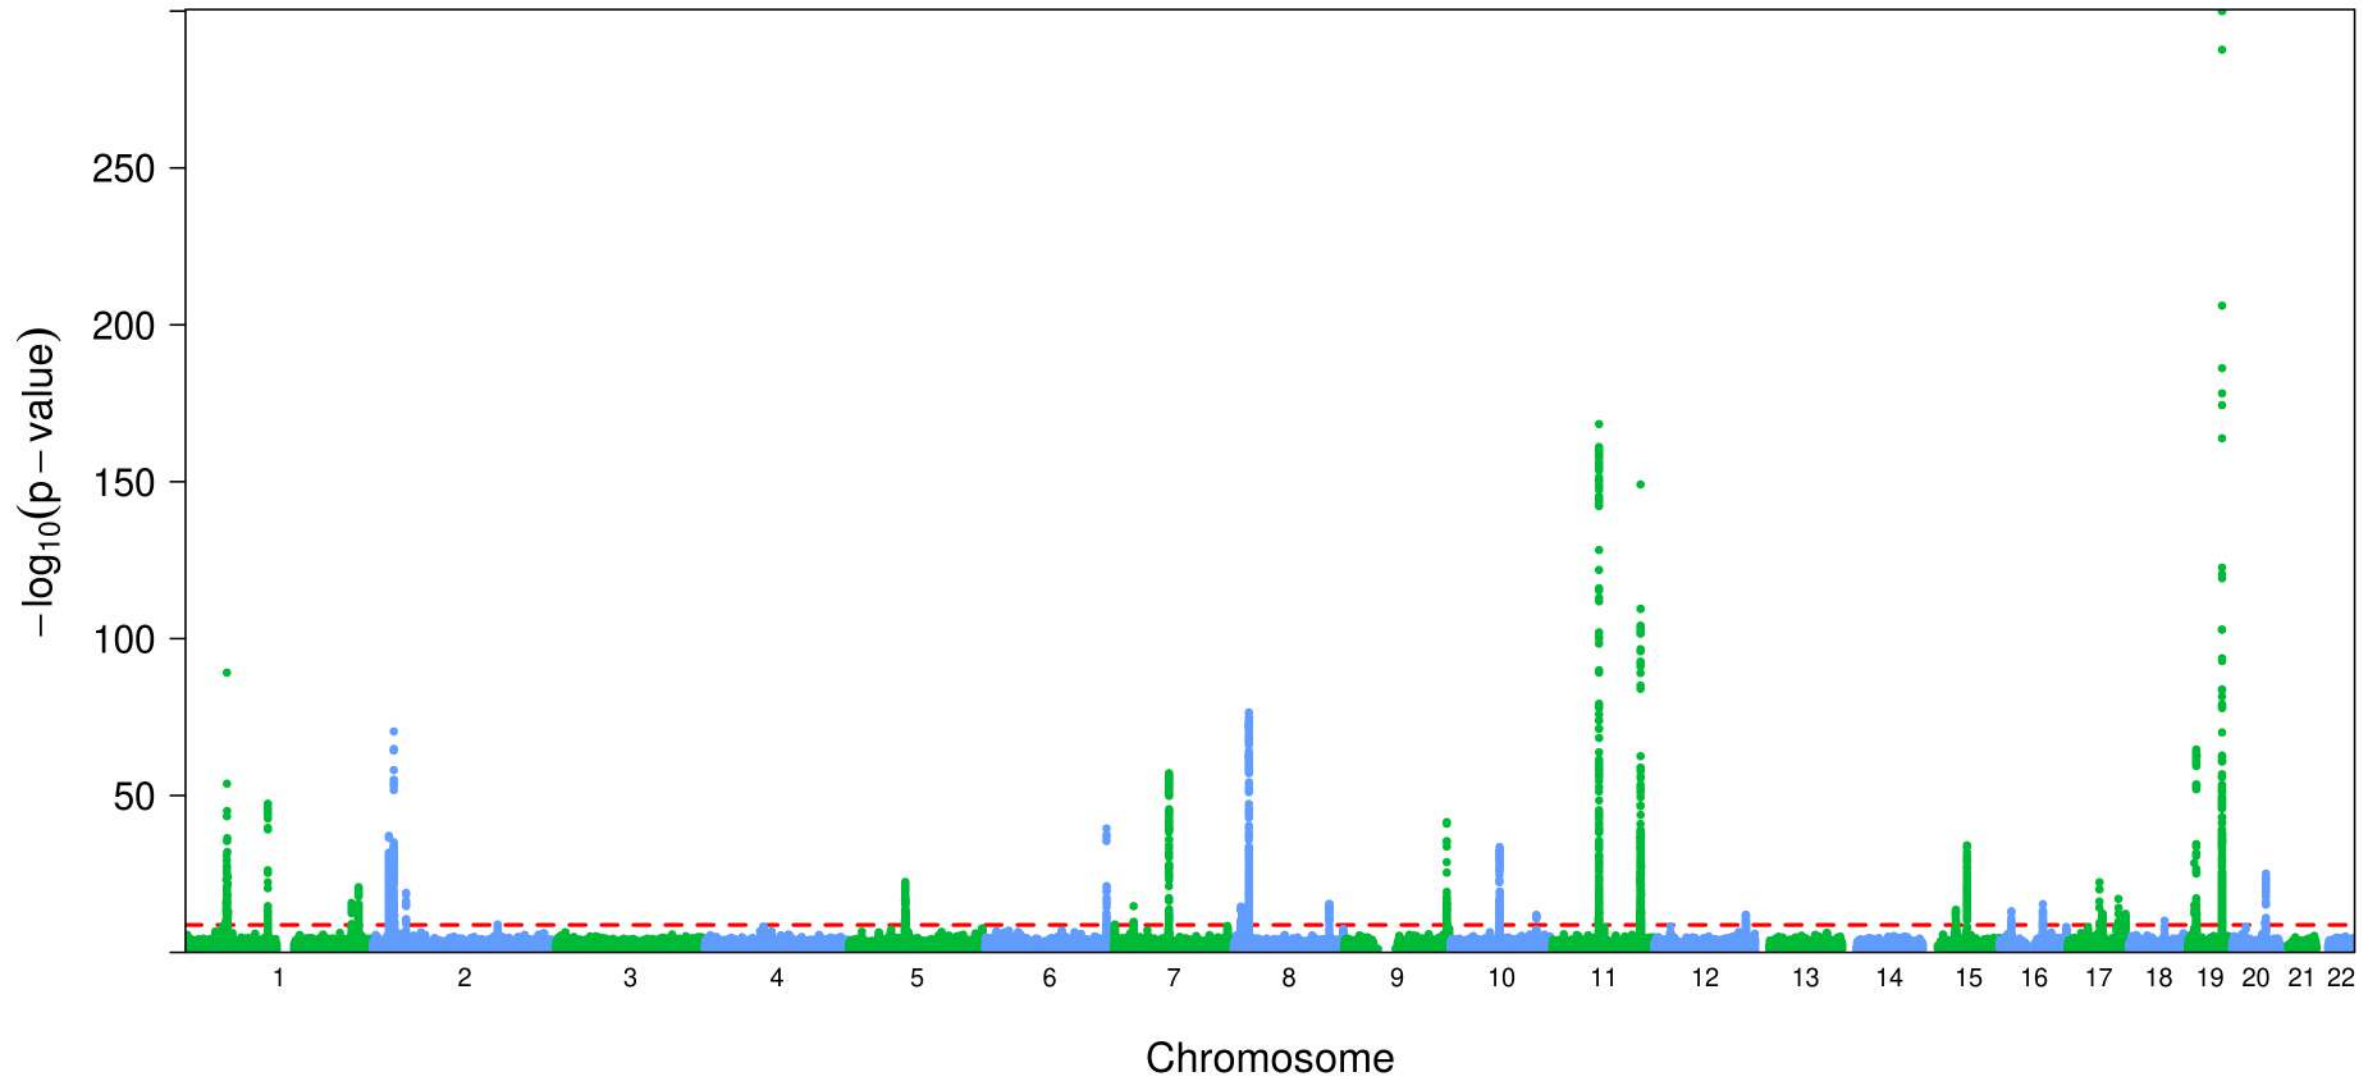



# S-VLDL-CE

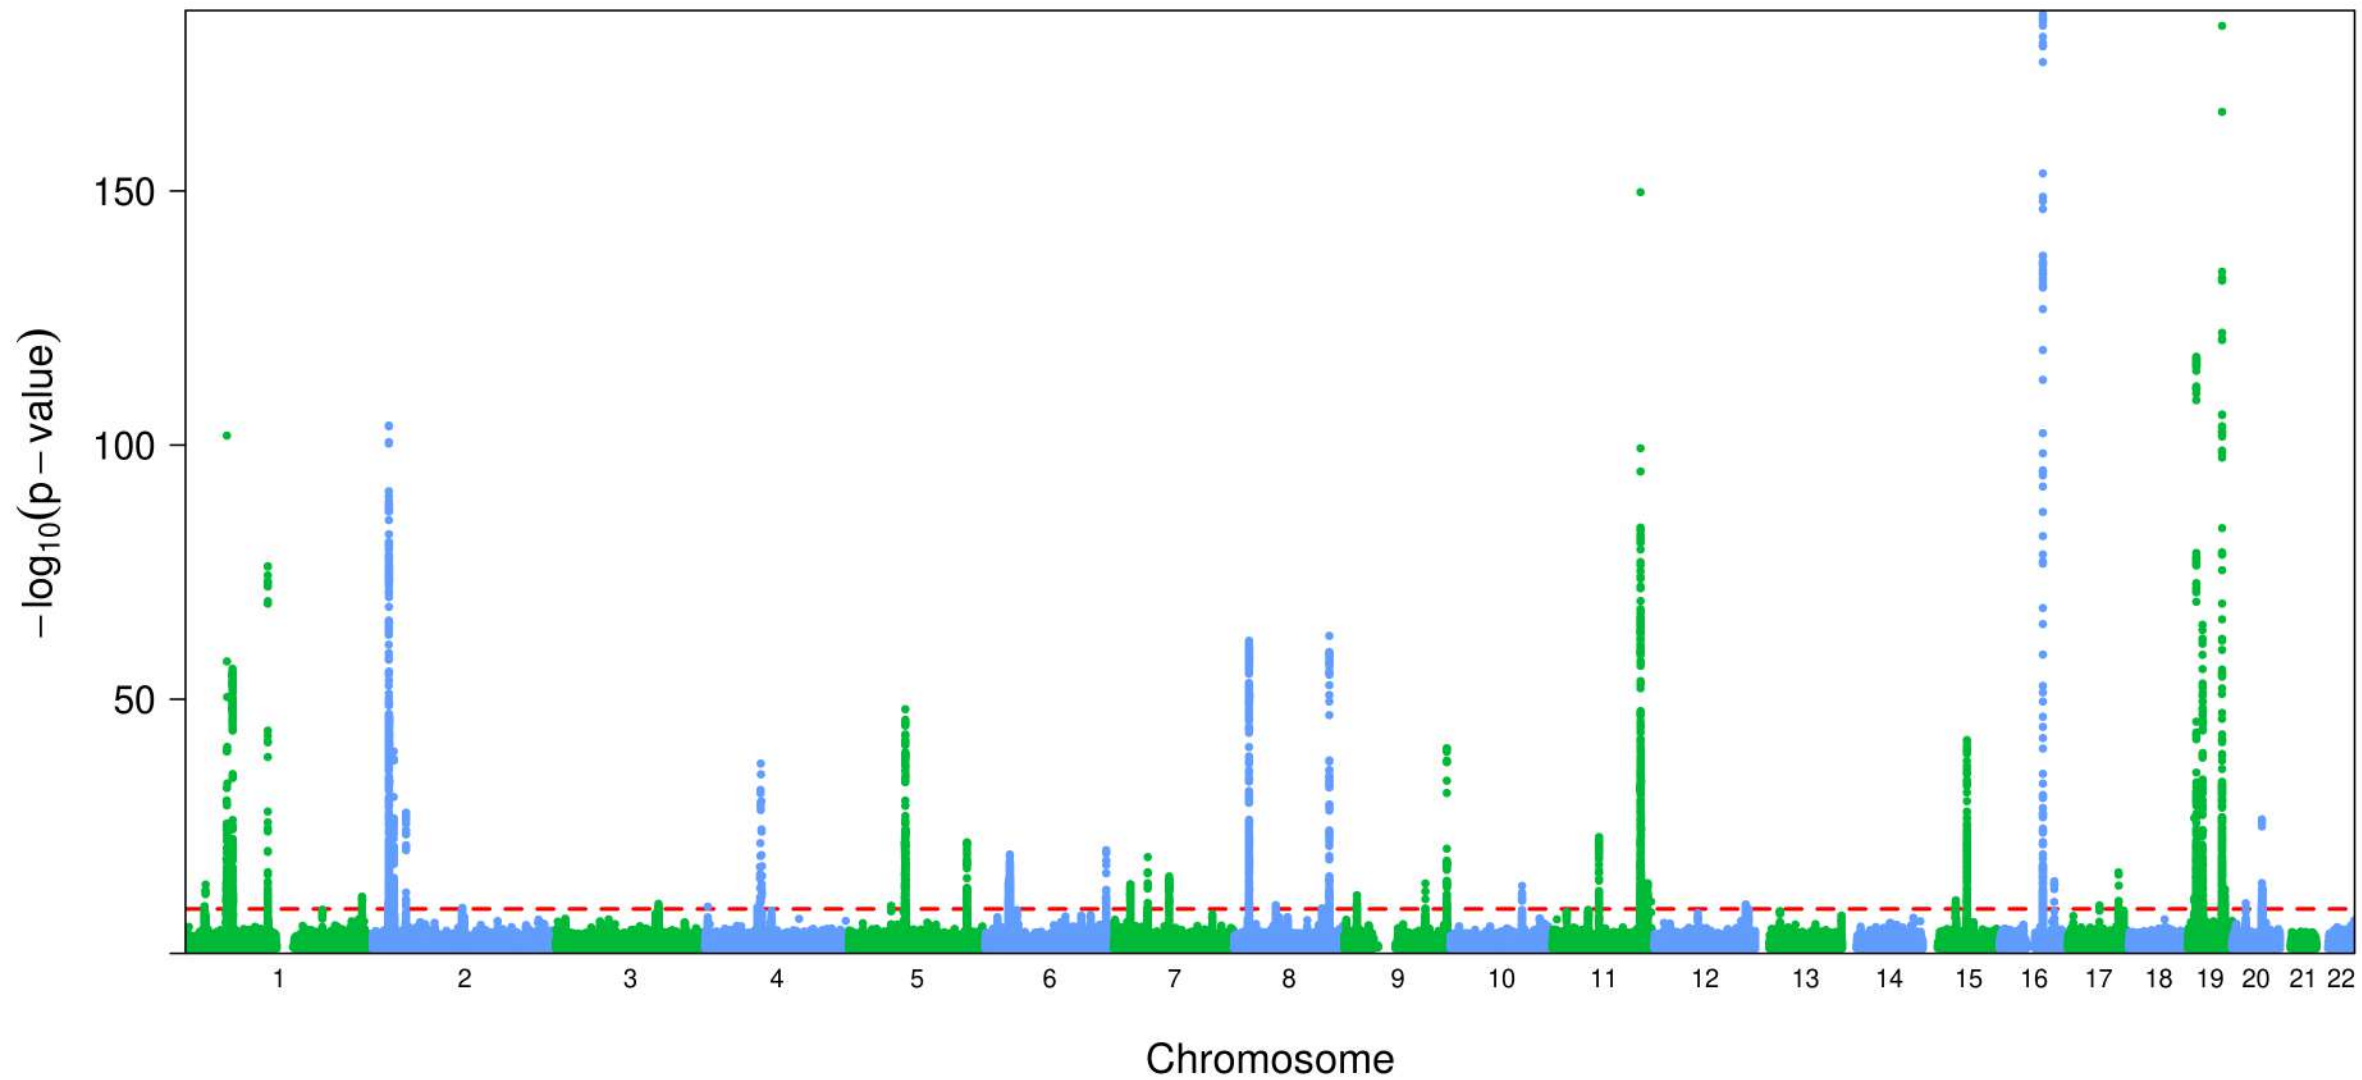

# S-VLDL-CE\_percent

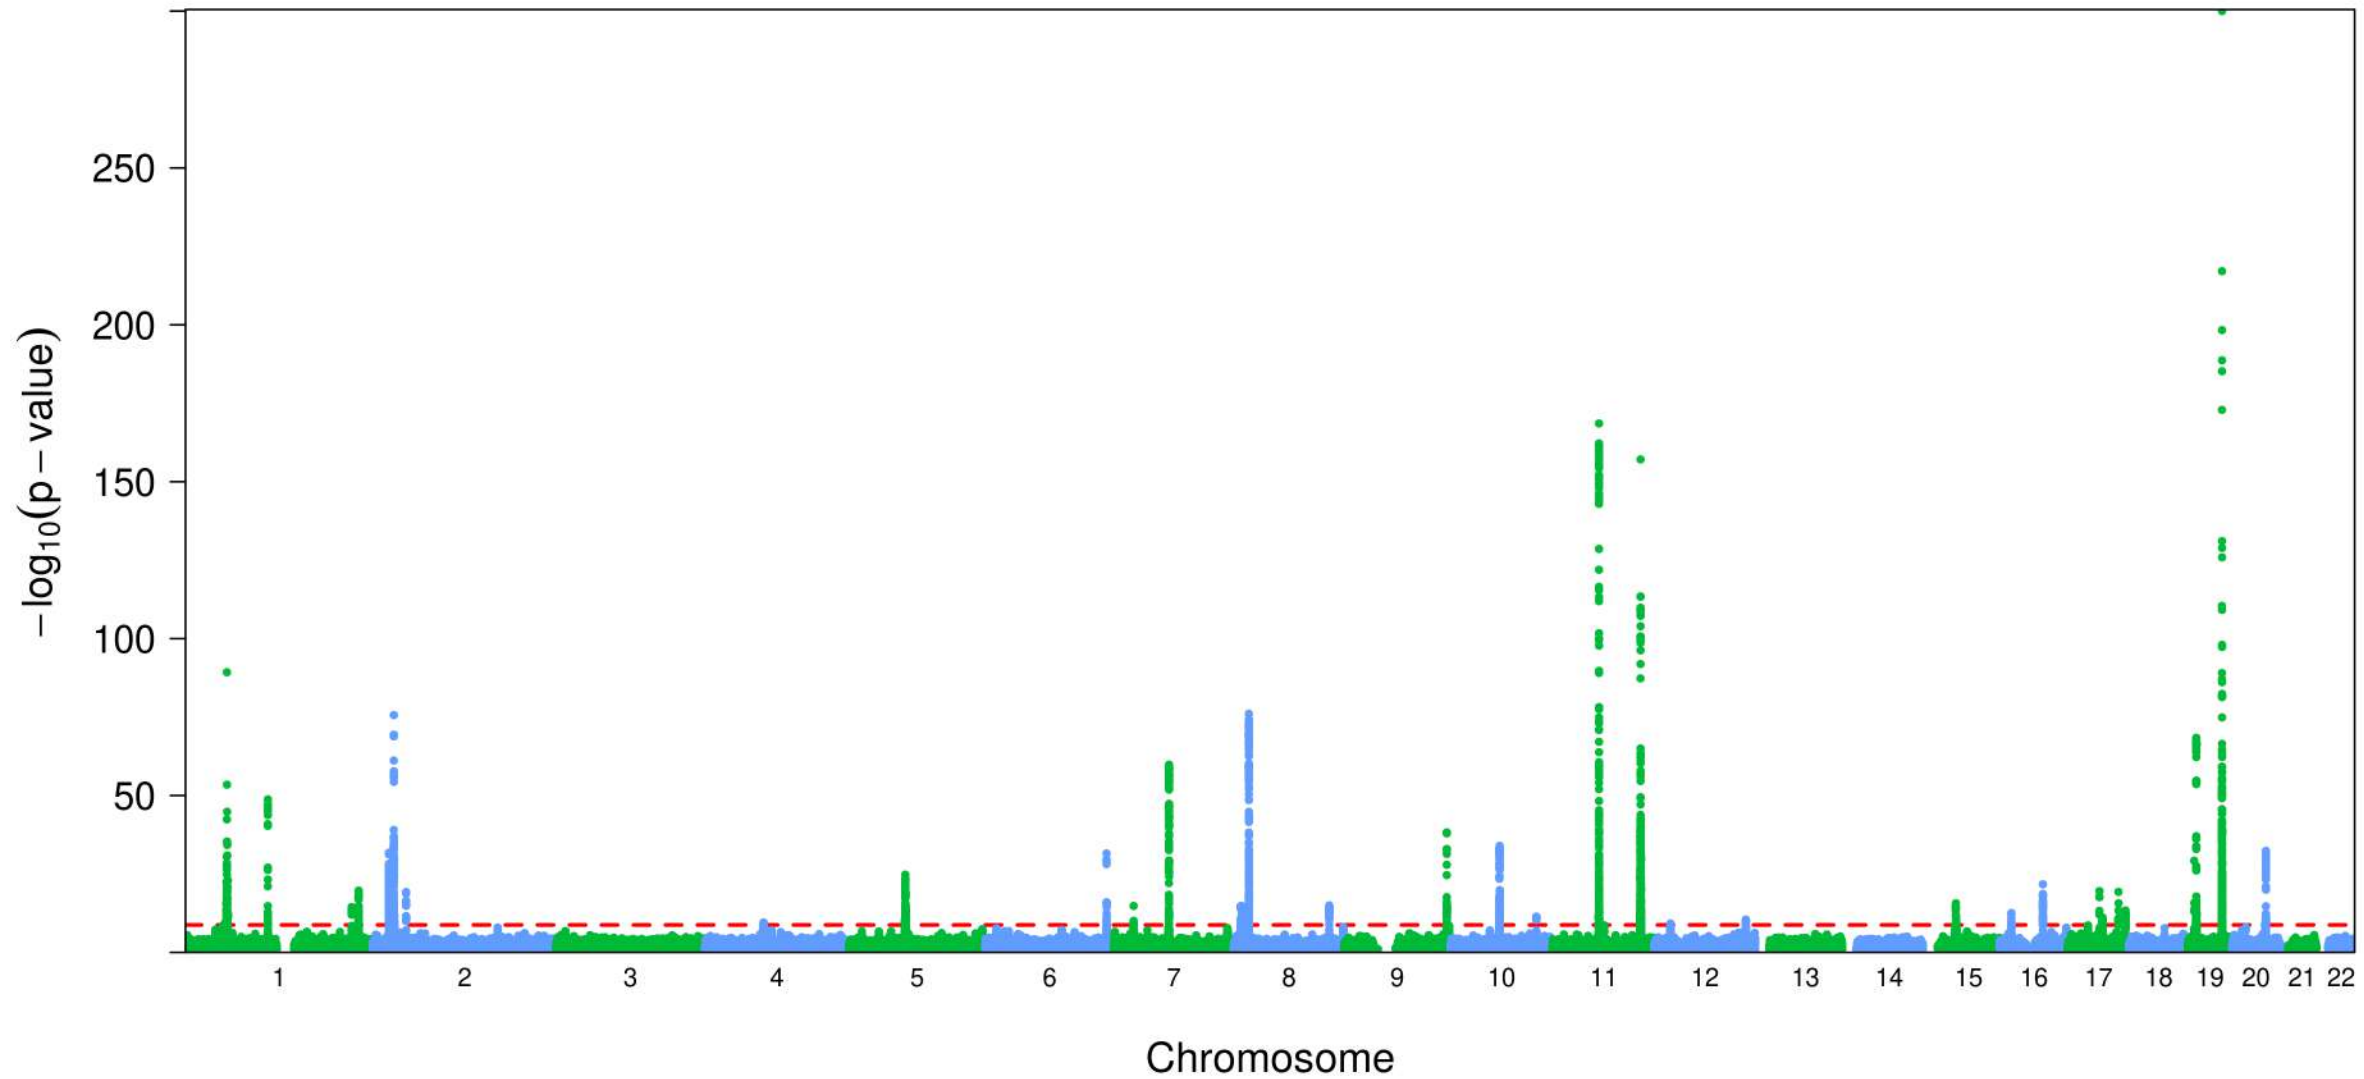

# S-VLDL-FC

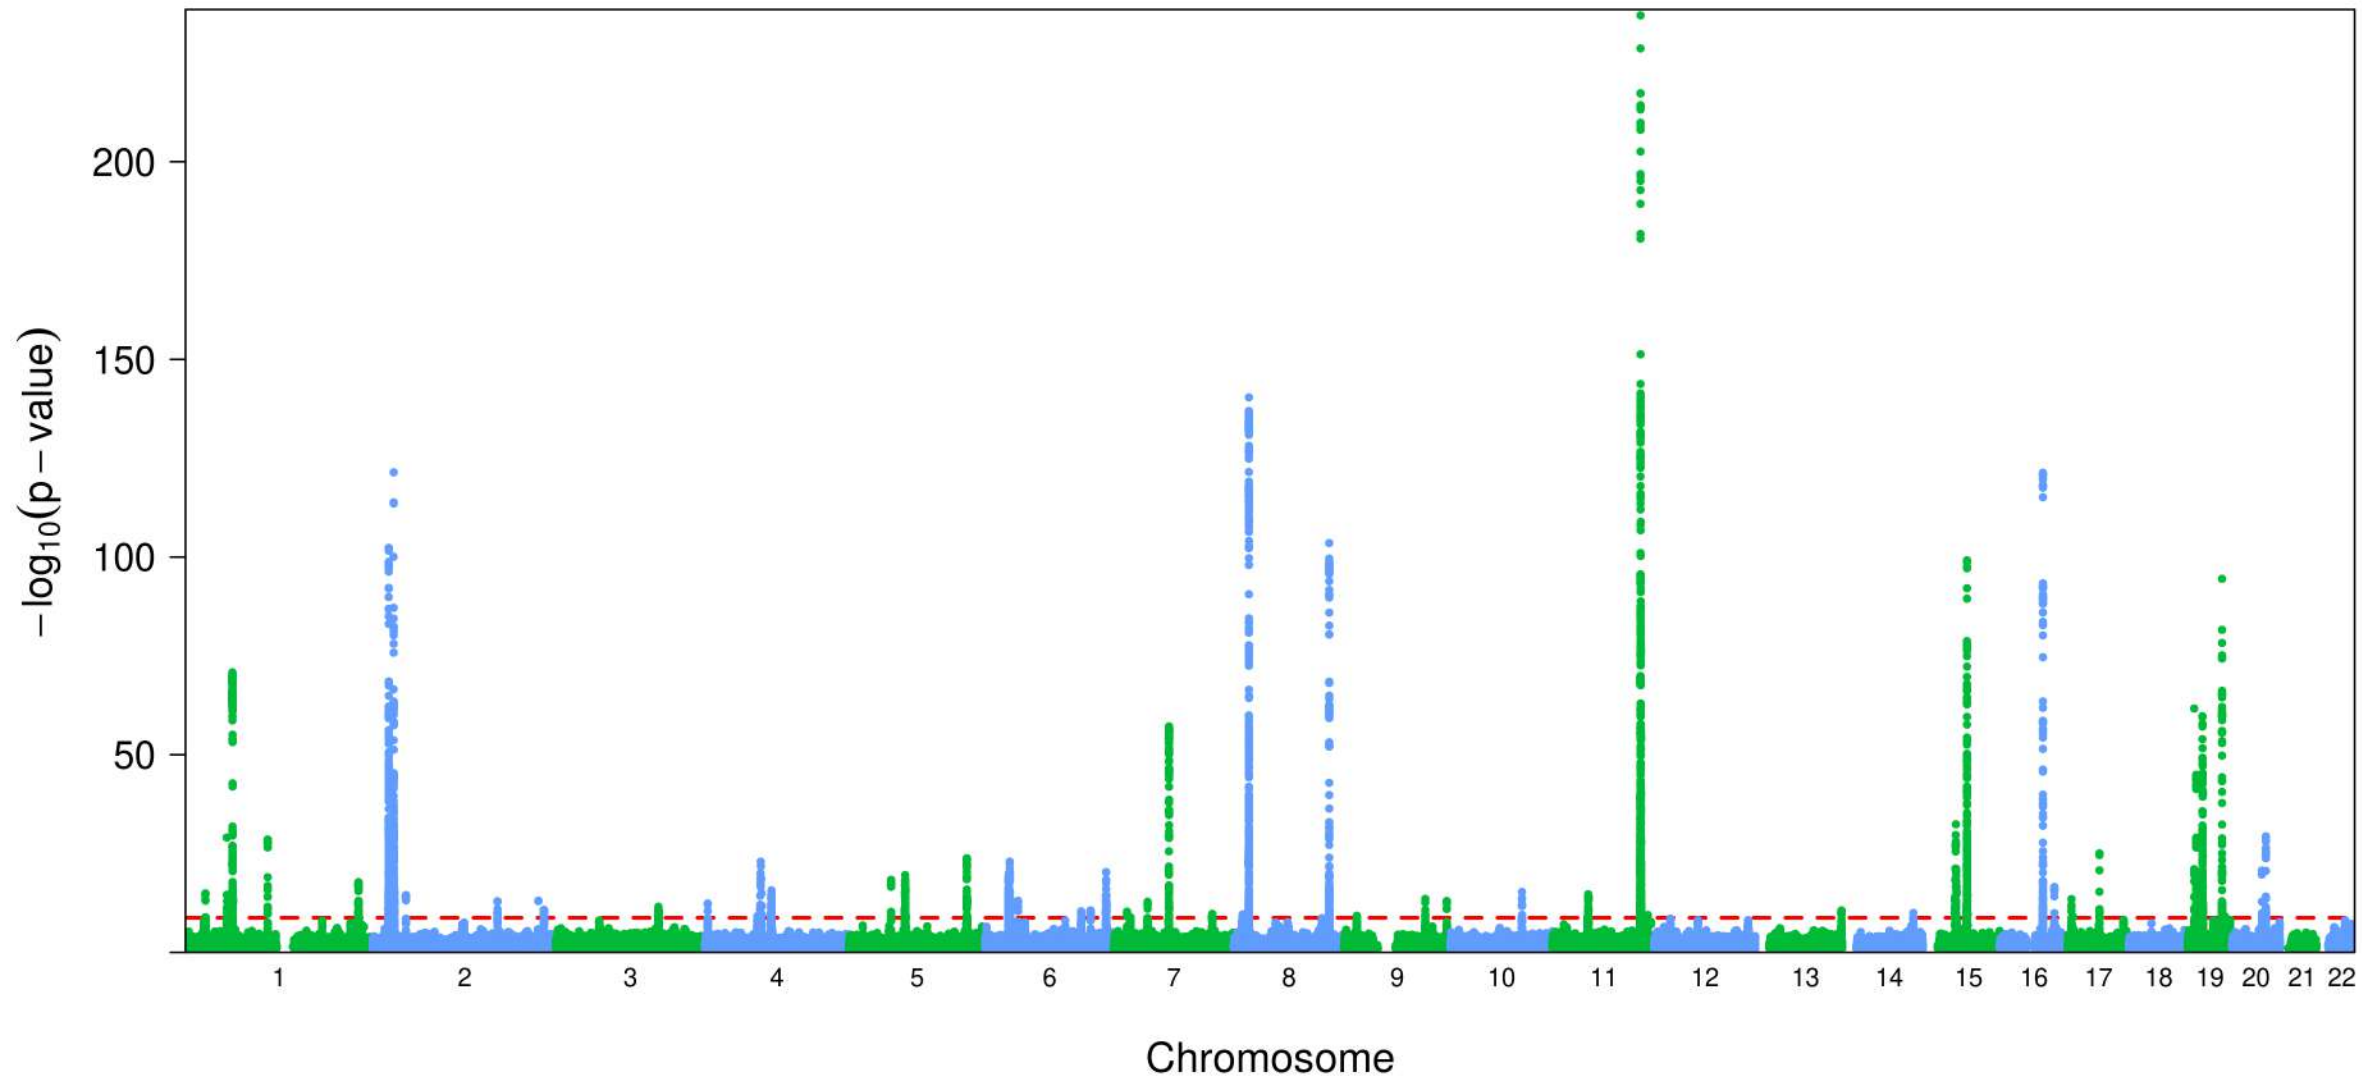

# S-VLDL-FC\_percent

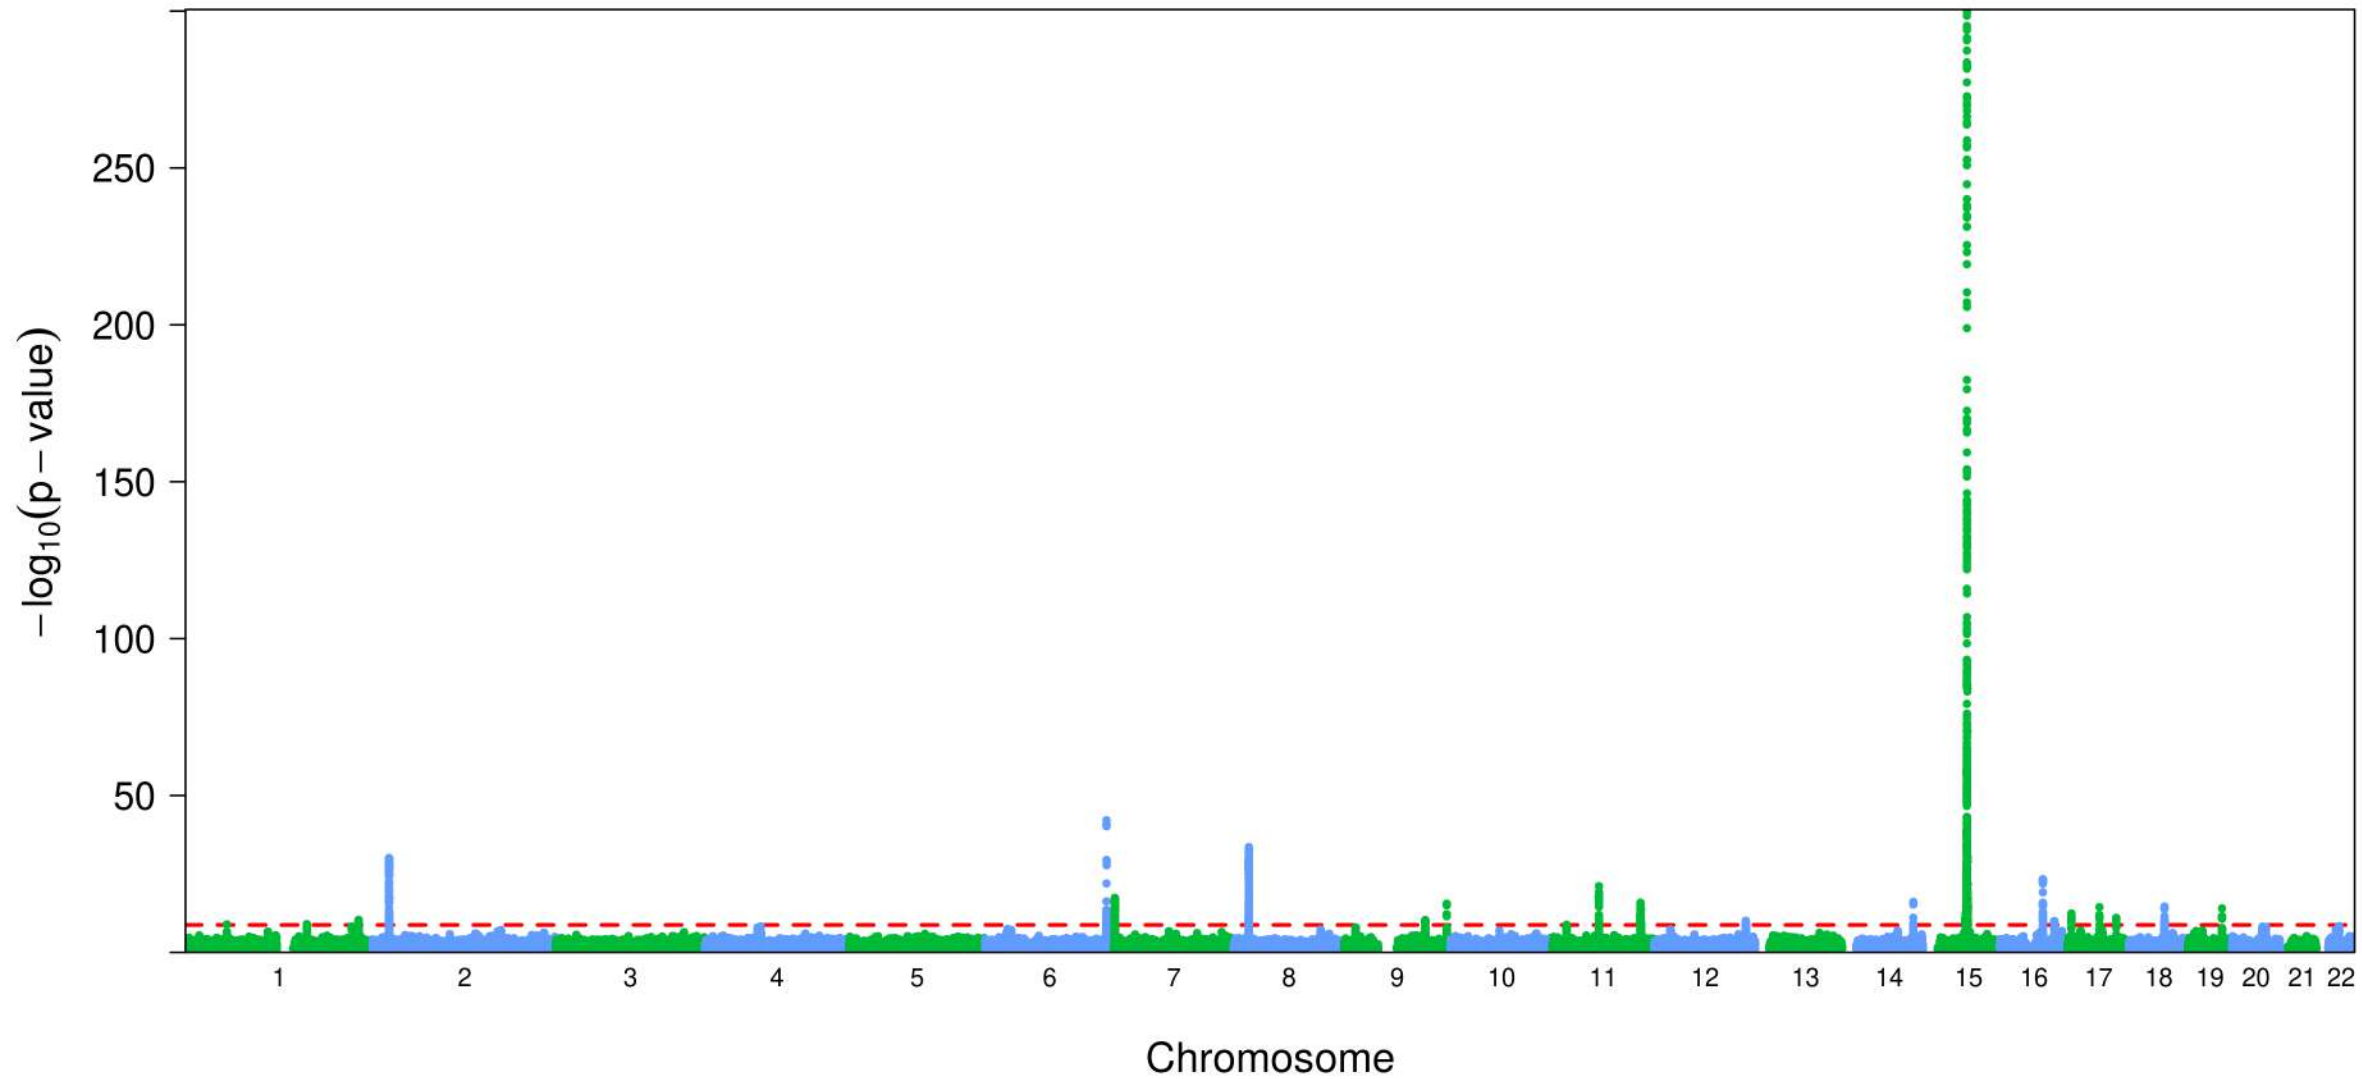

# S-VLDL-L

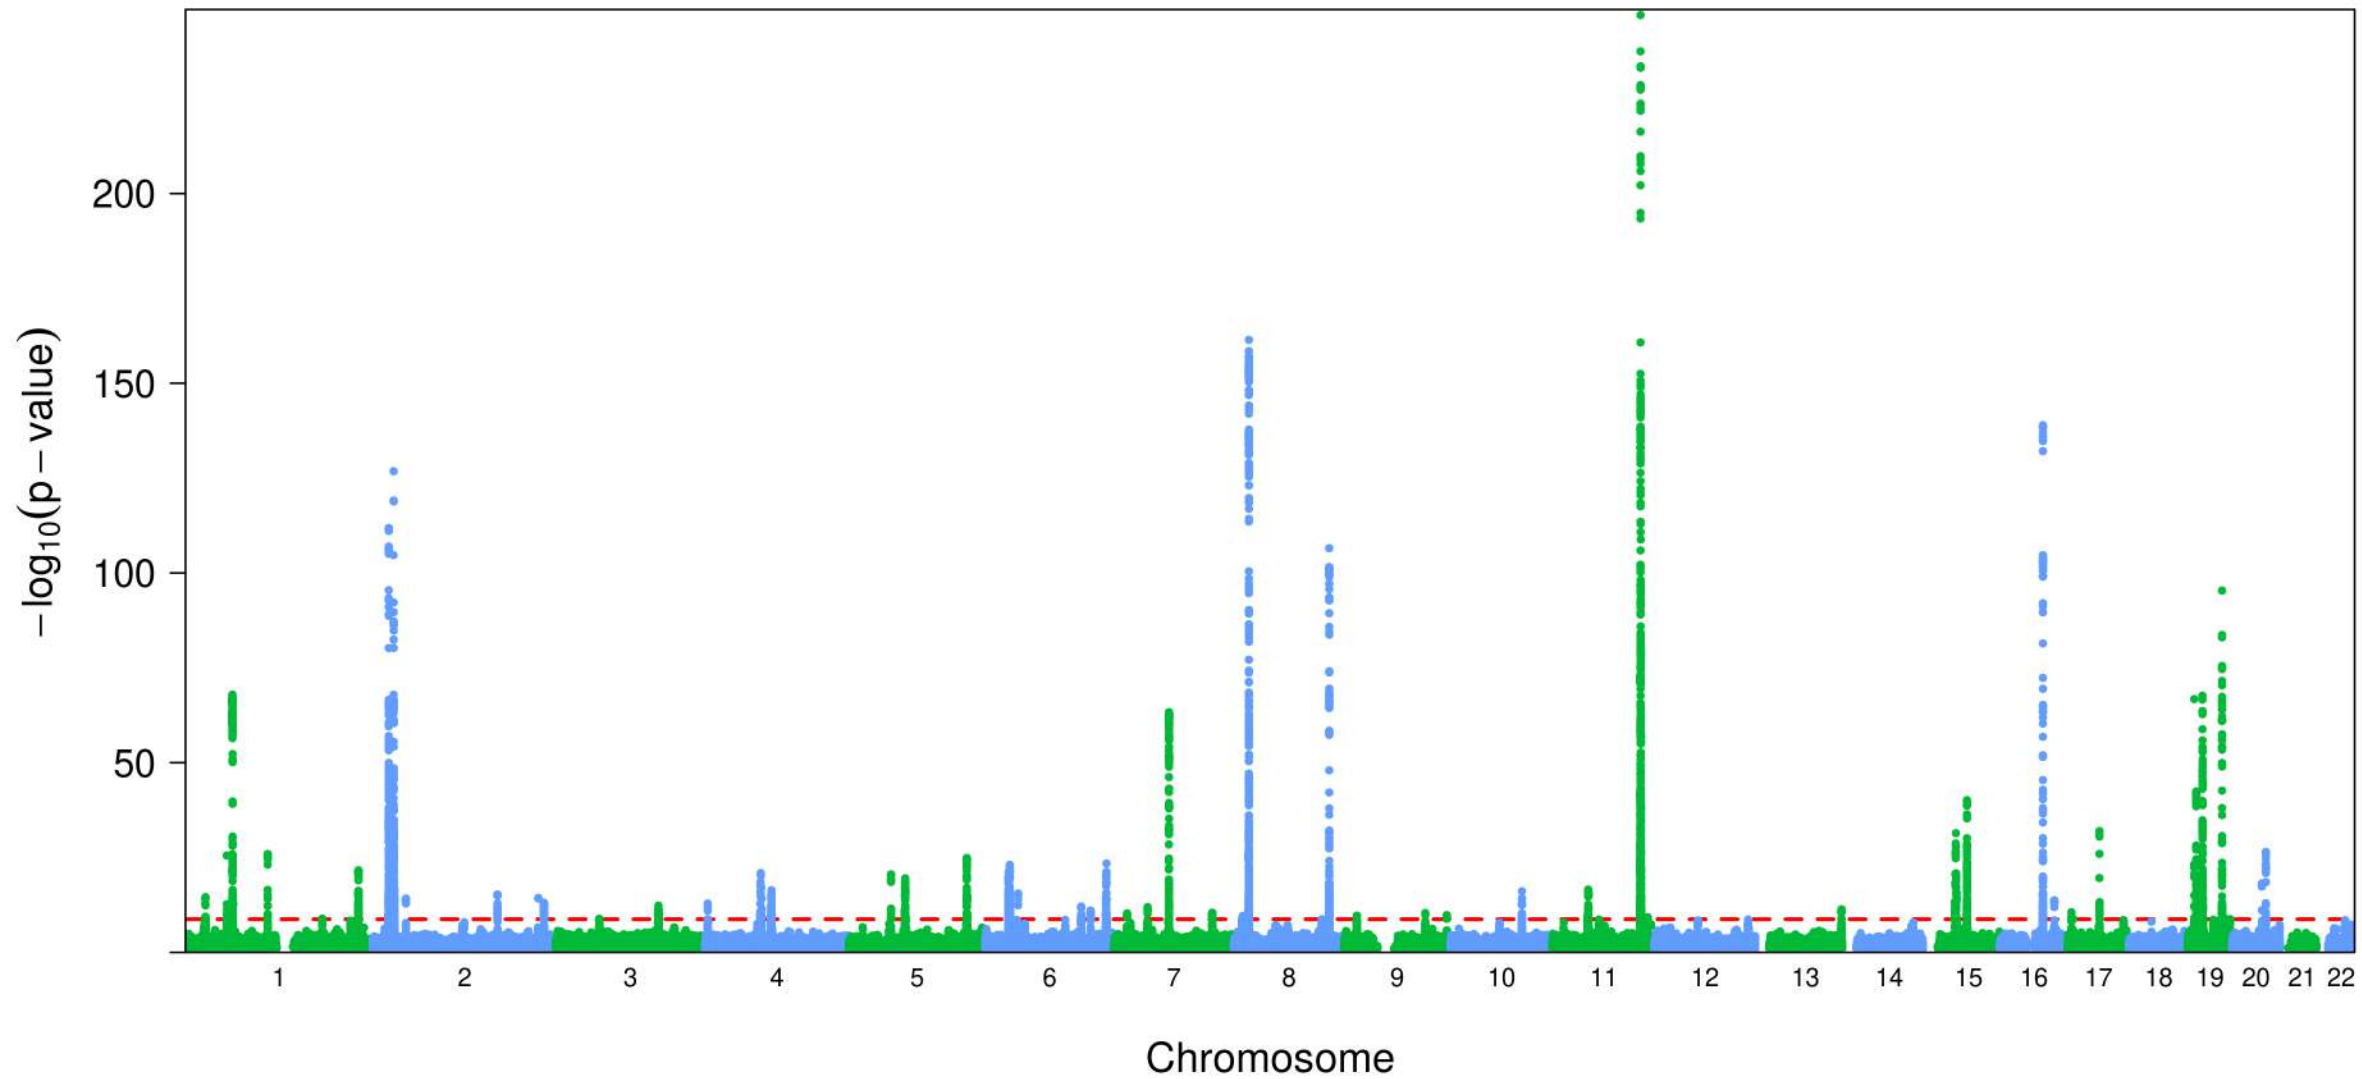

# S-VLDL-P

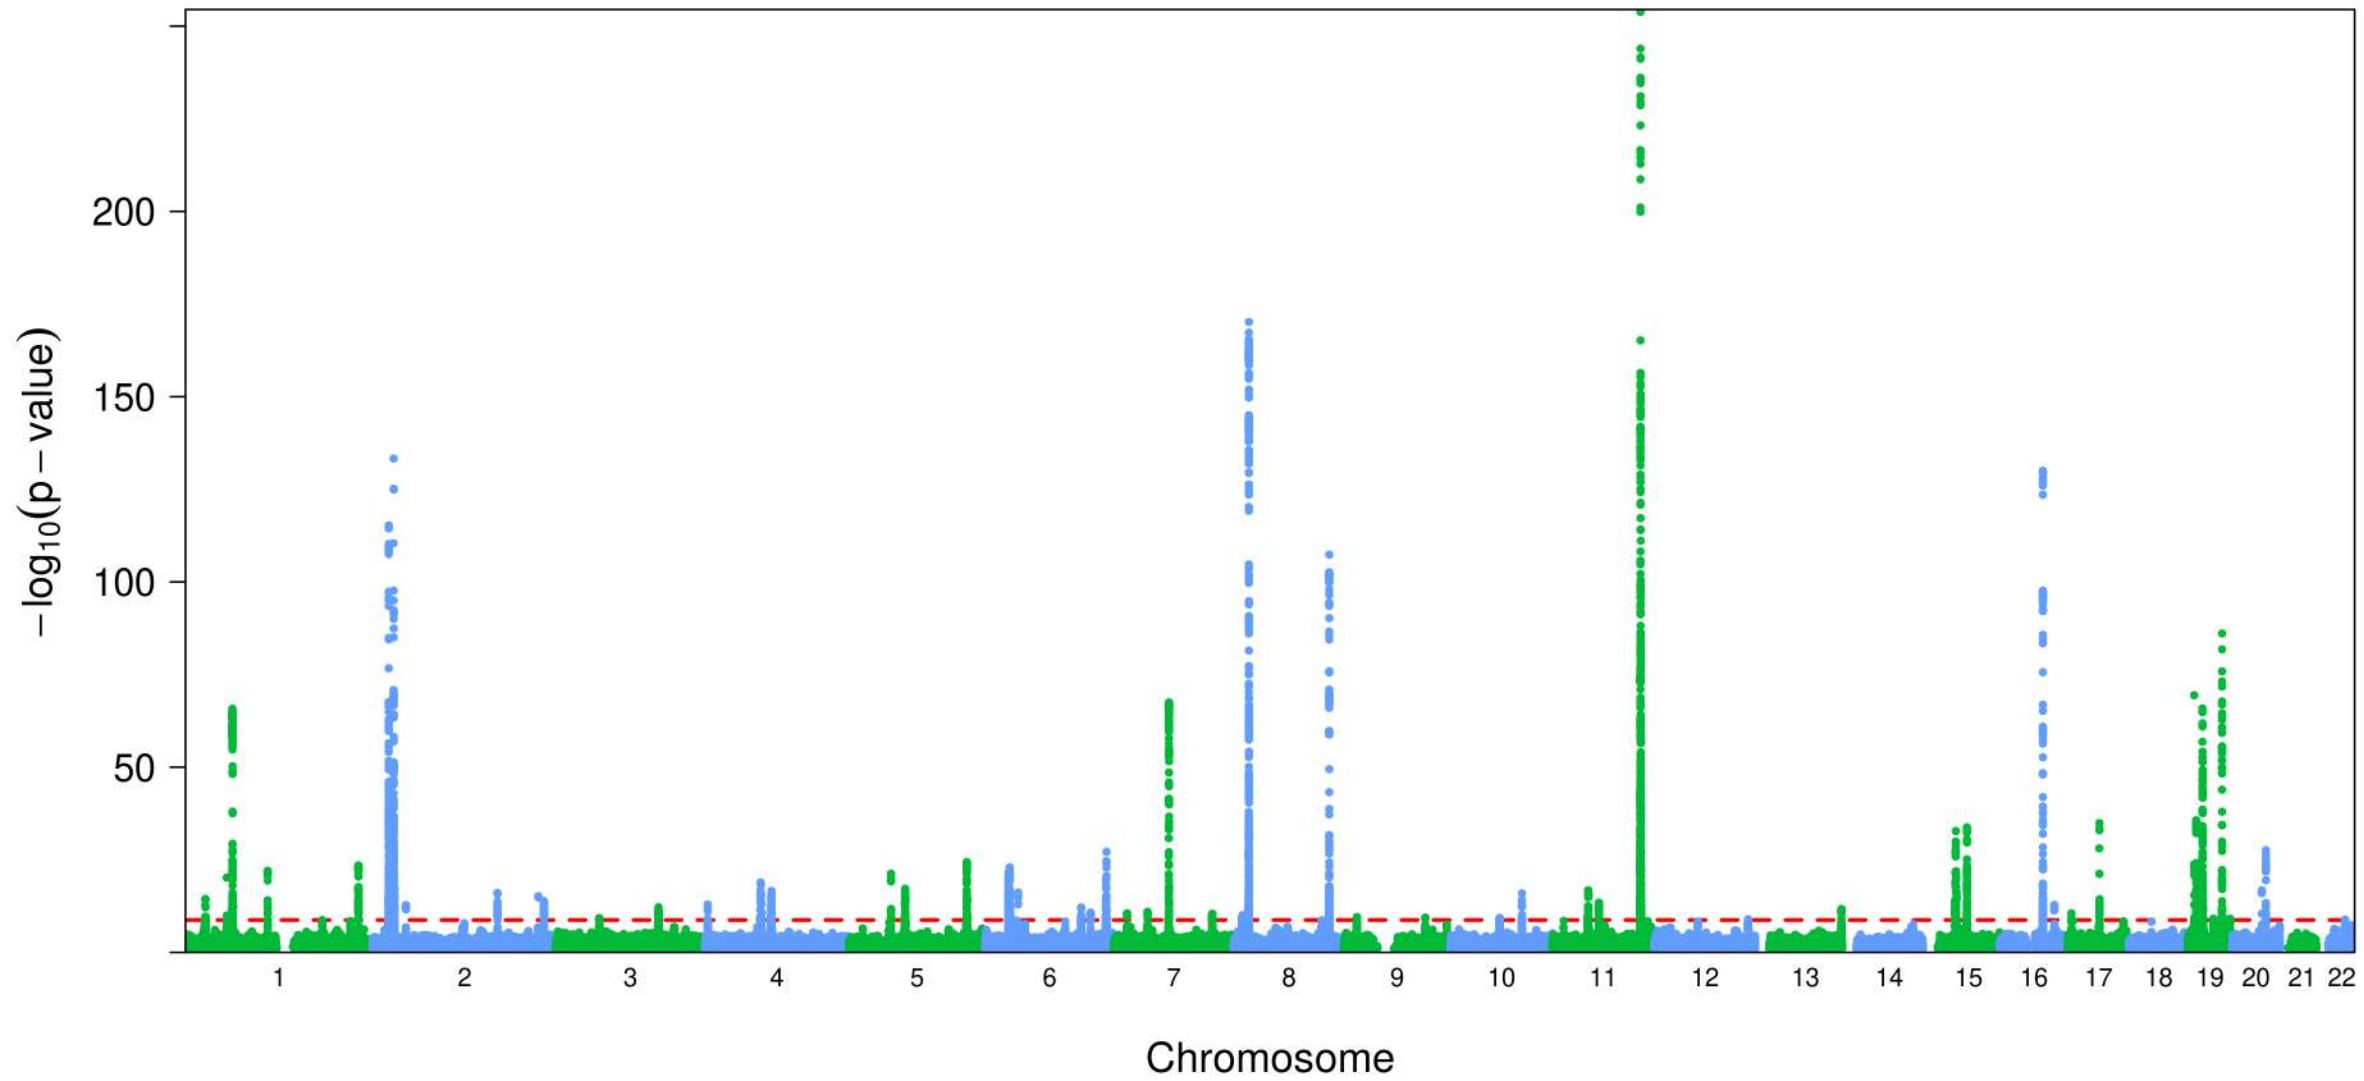

# S-VLDL-PL

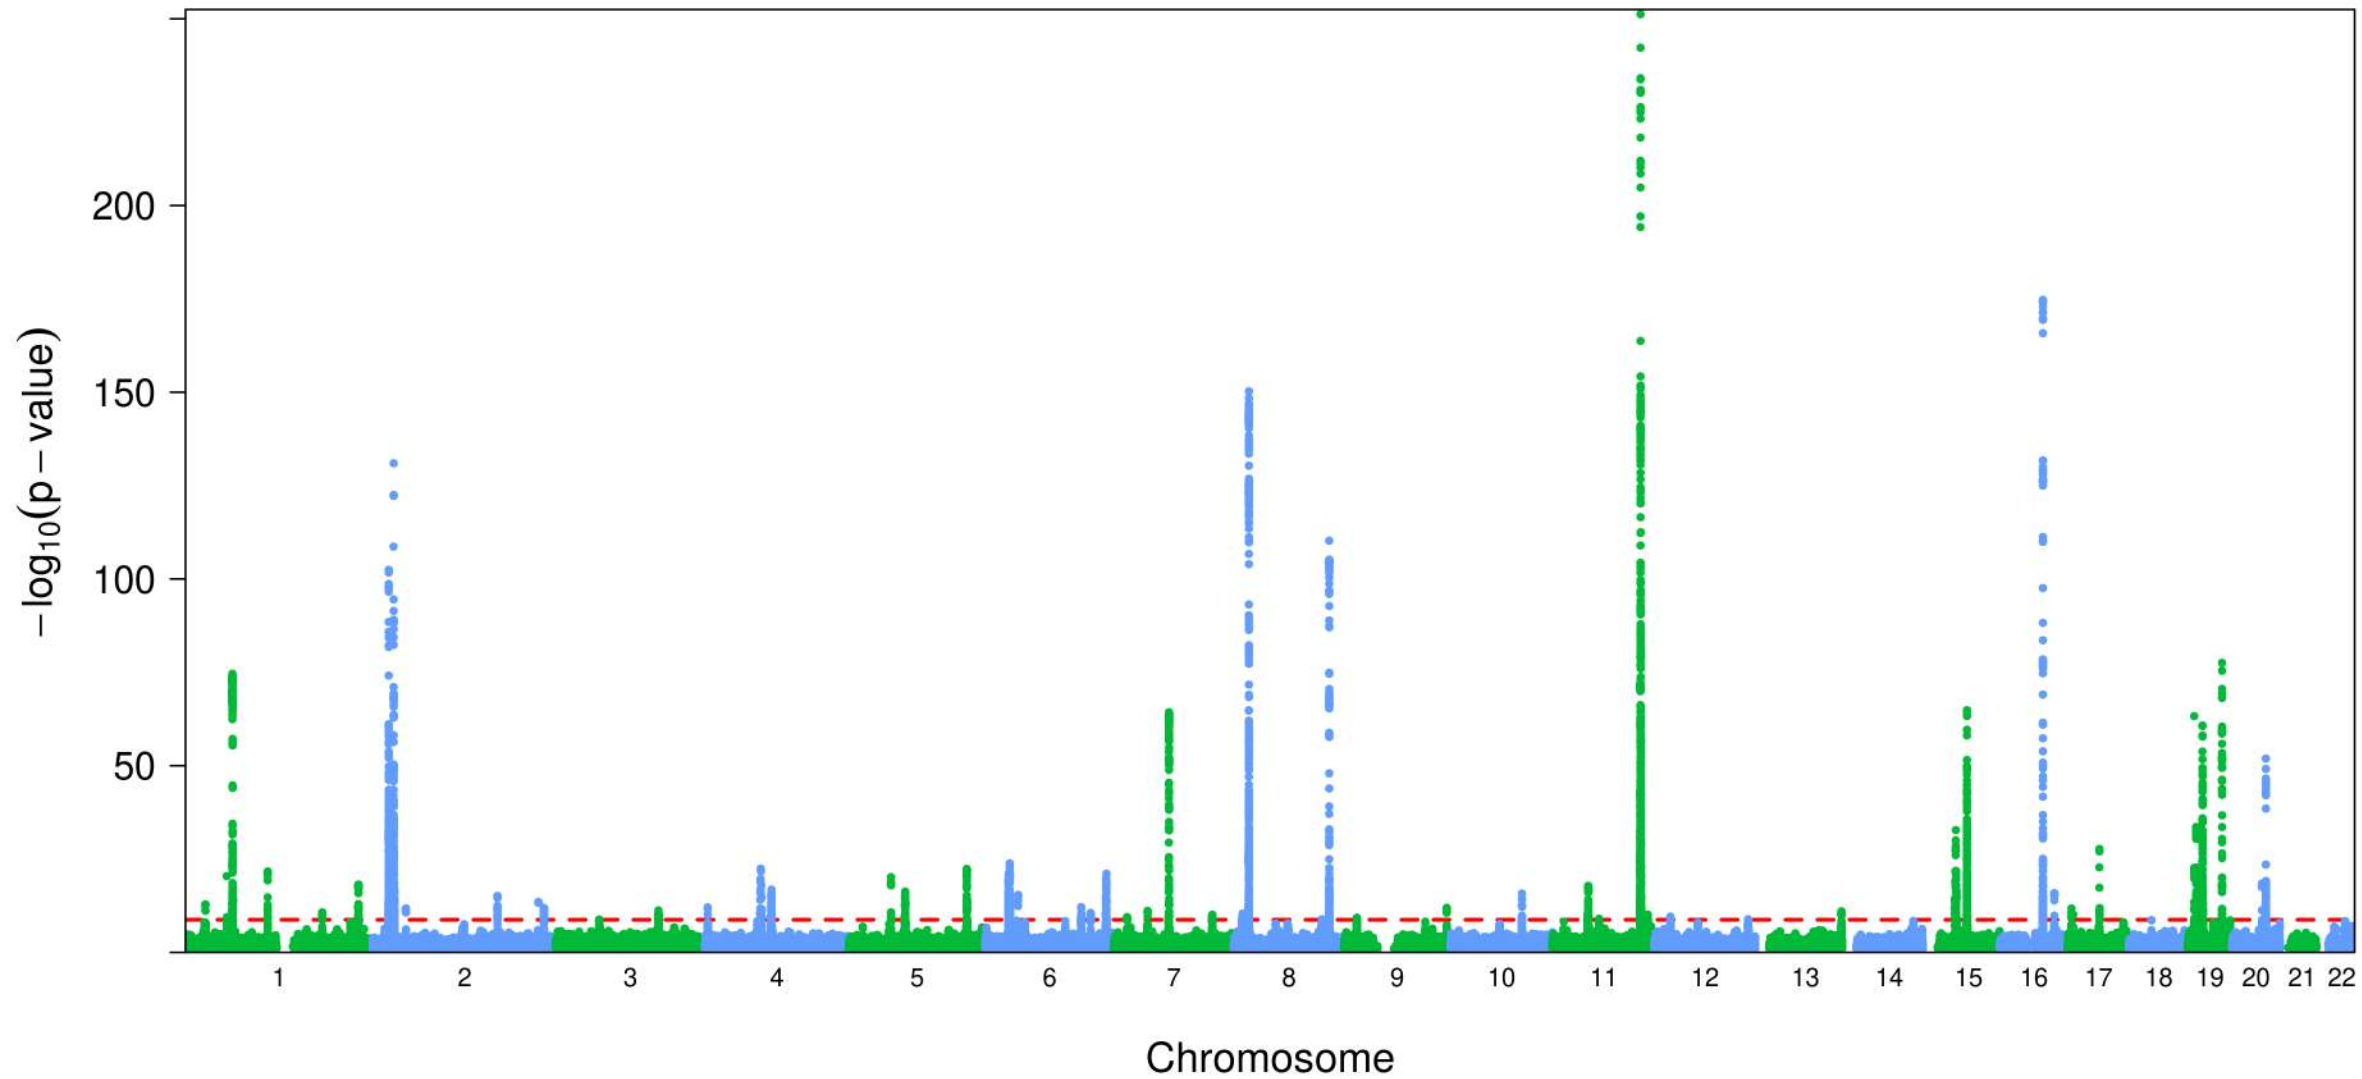

# S-VLDL-PL\_percent

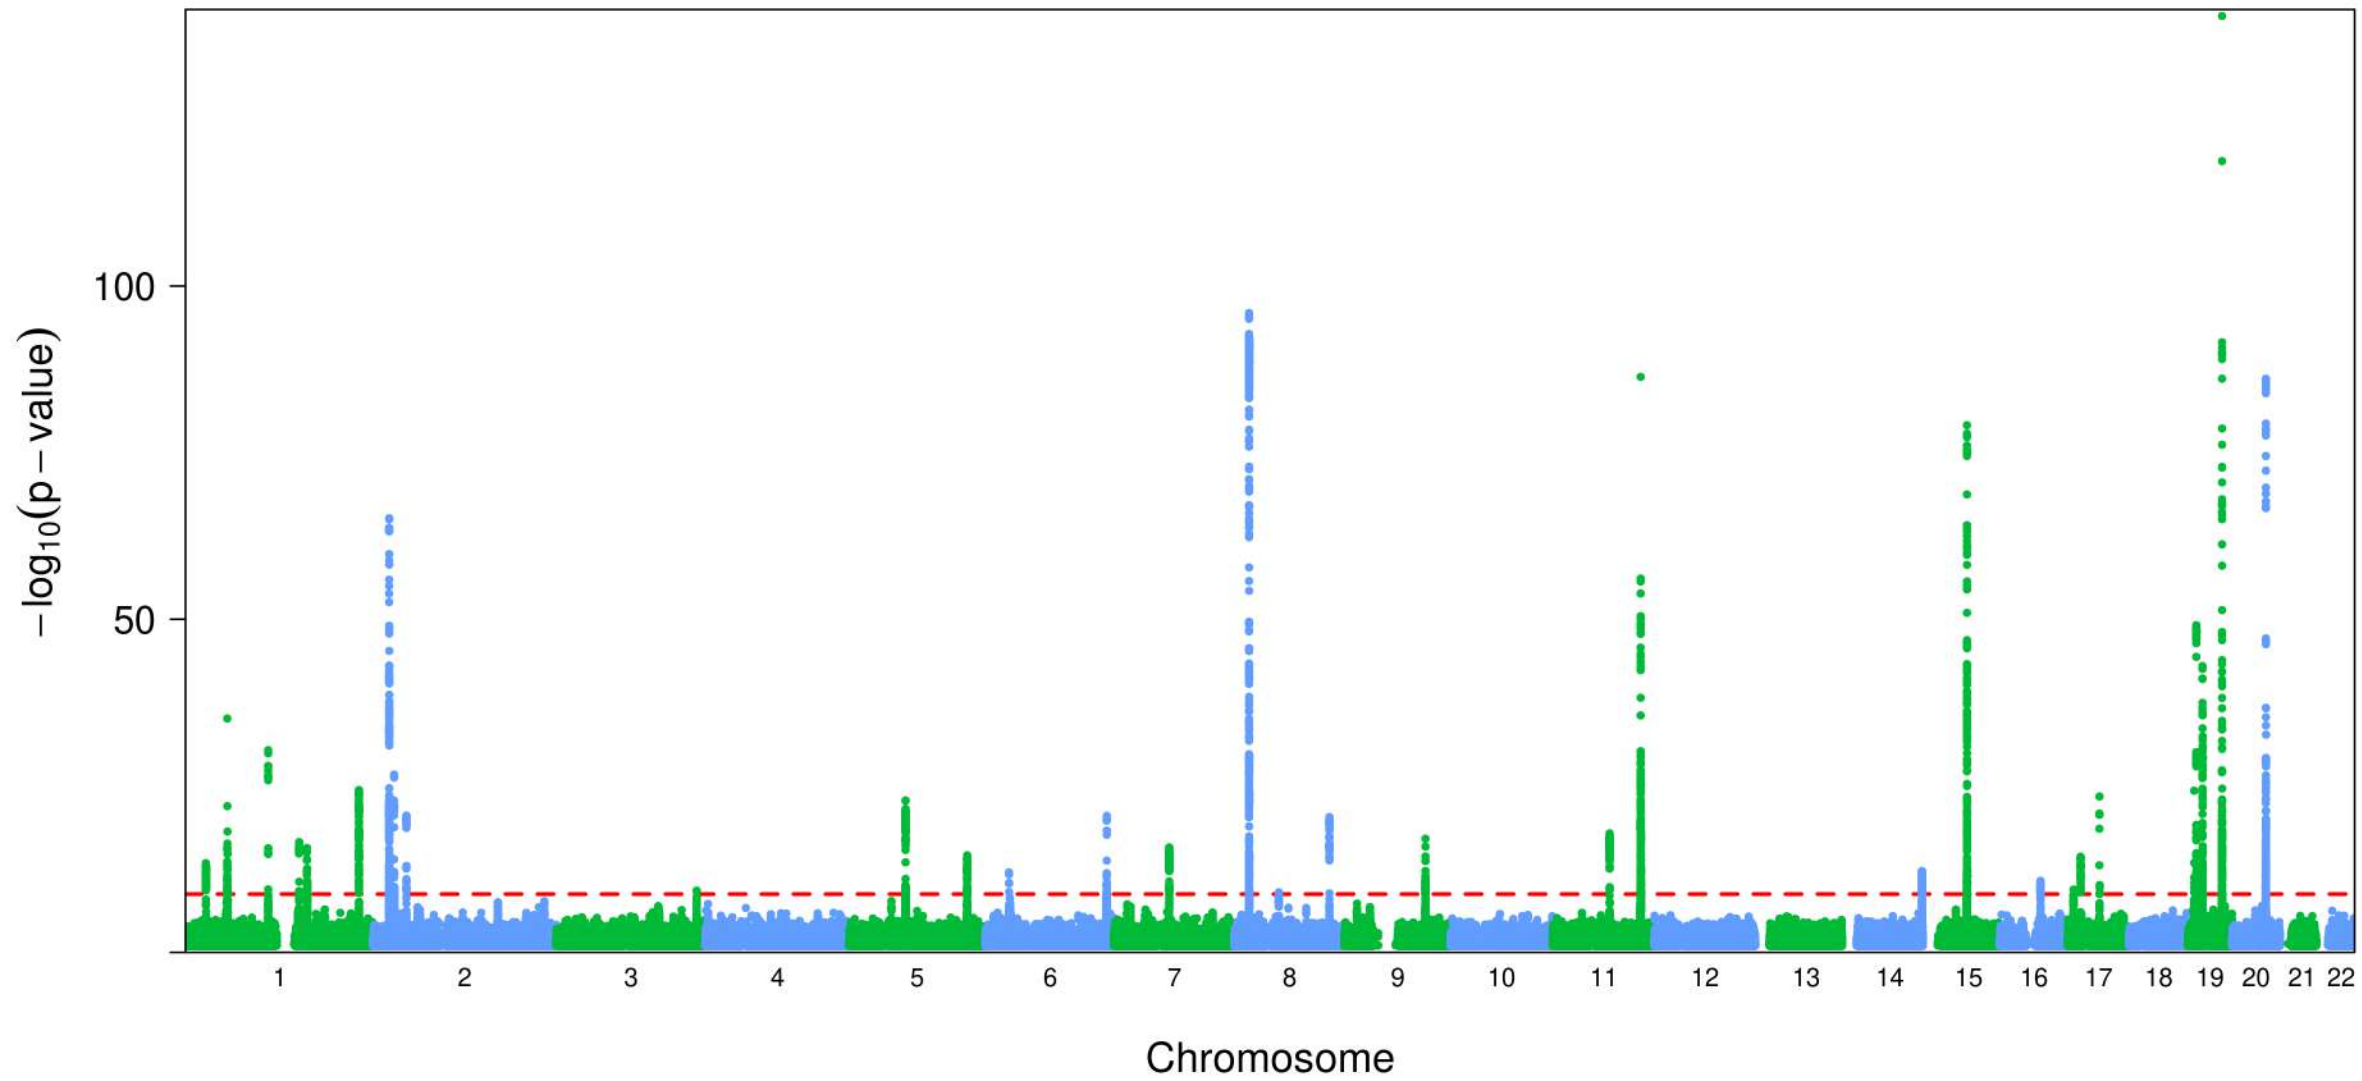



# S-VLDL-TG

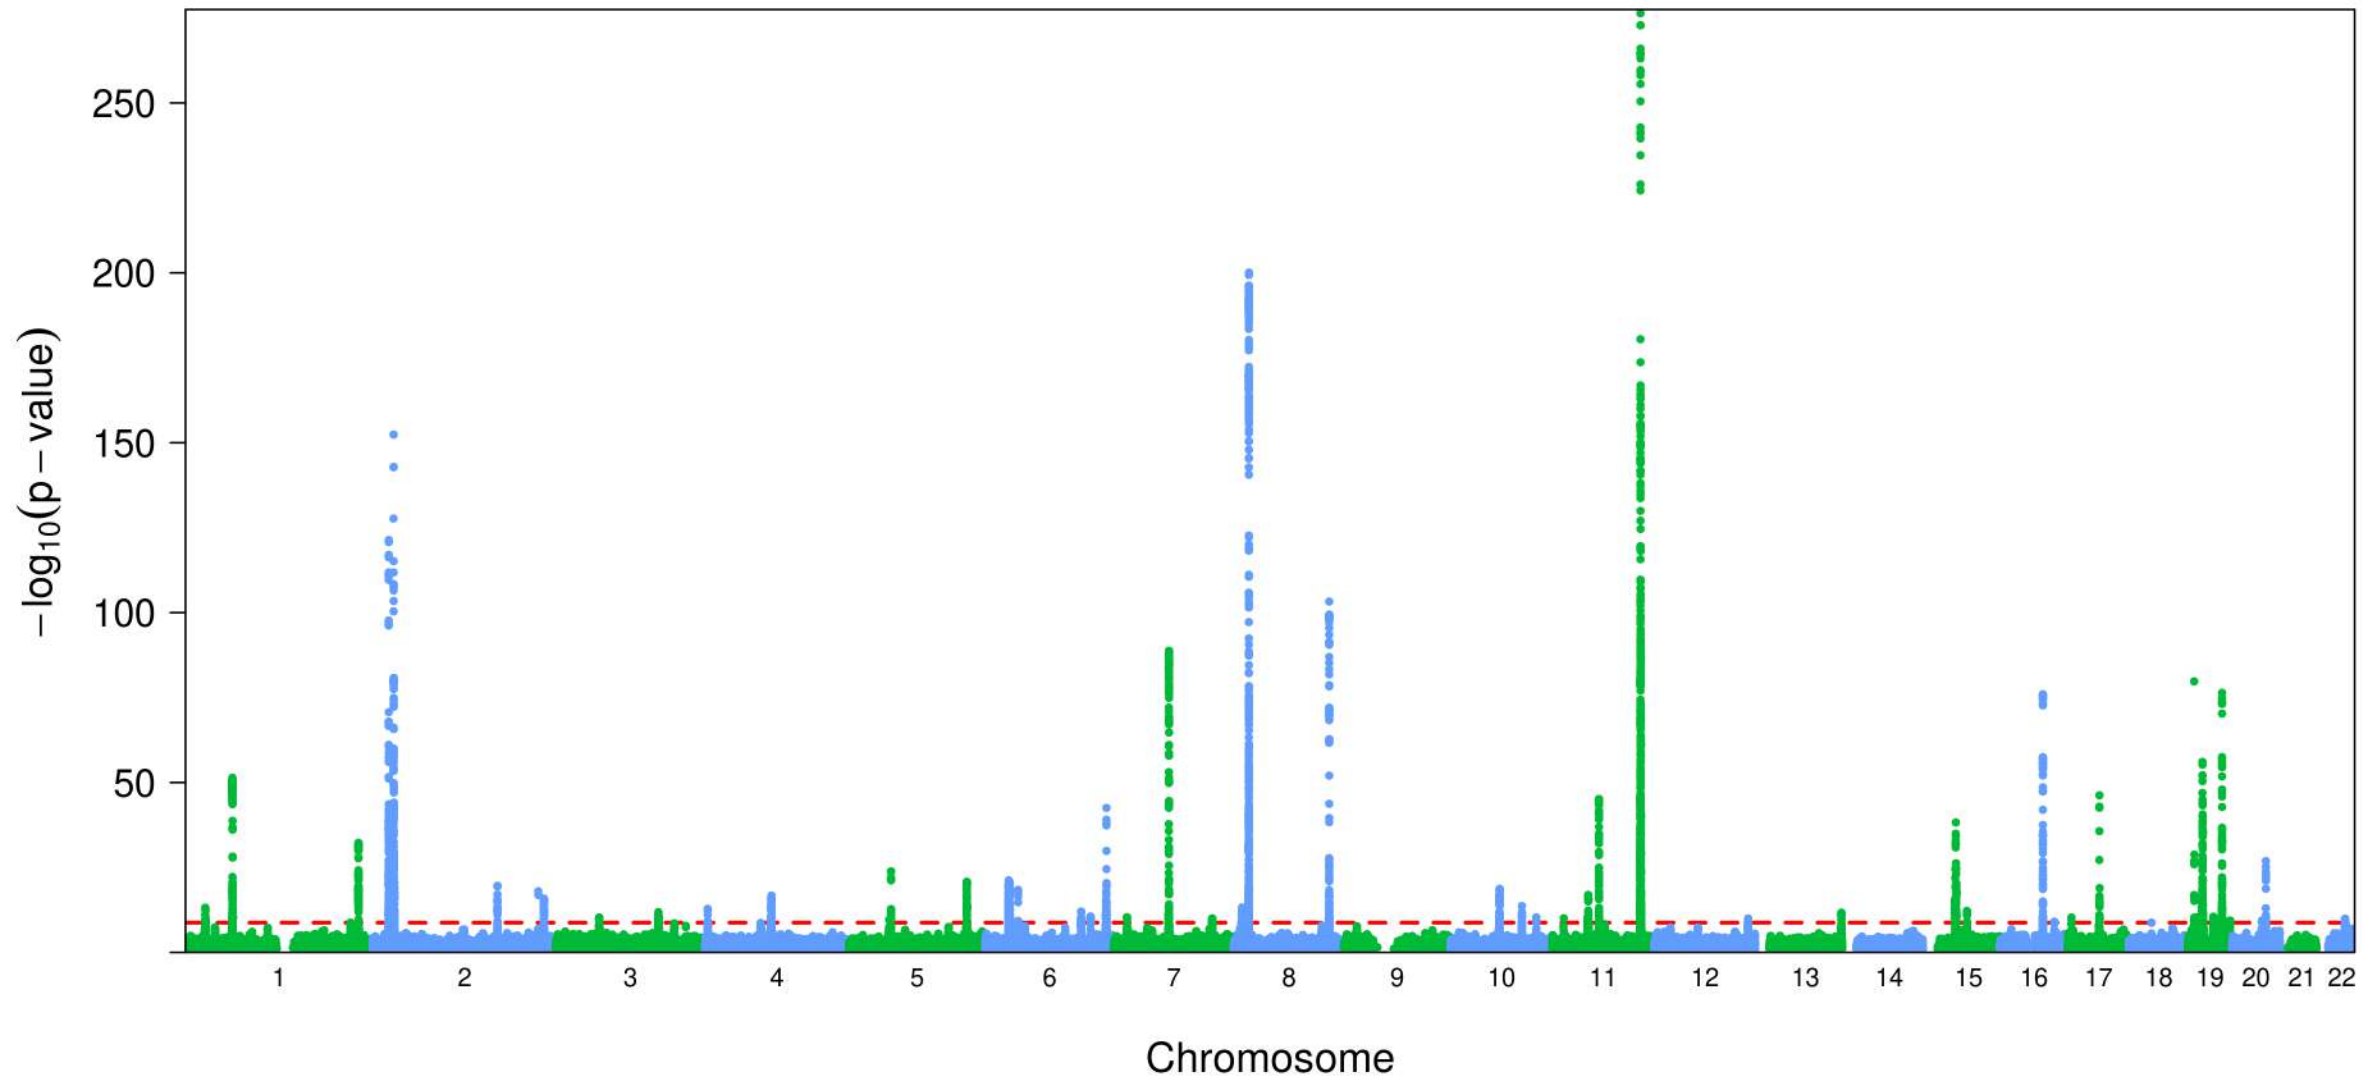

# S-VLDL-TG\_percent

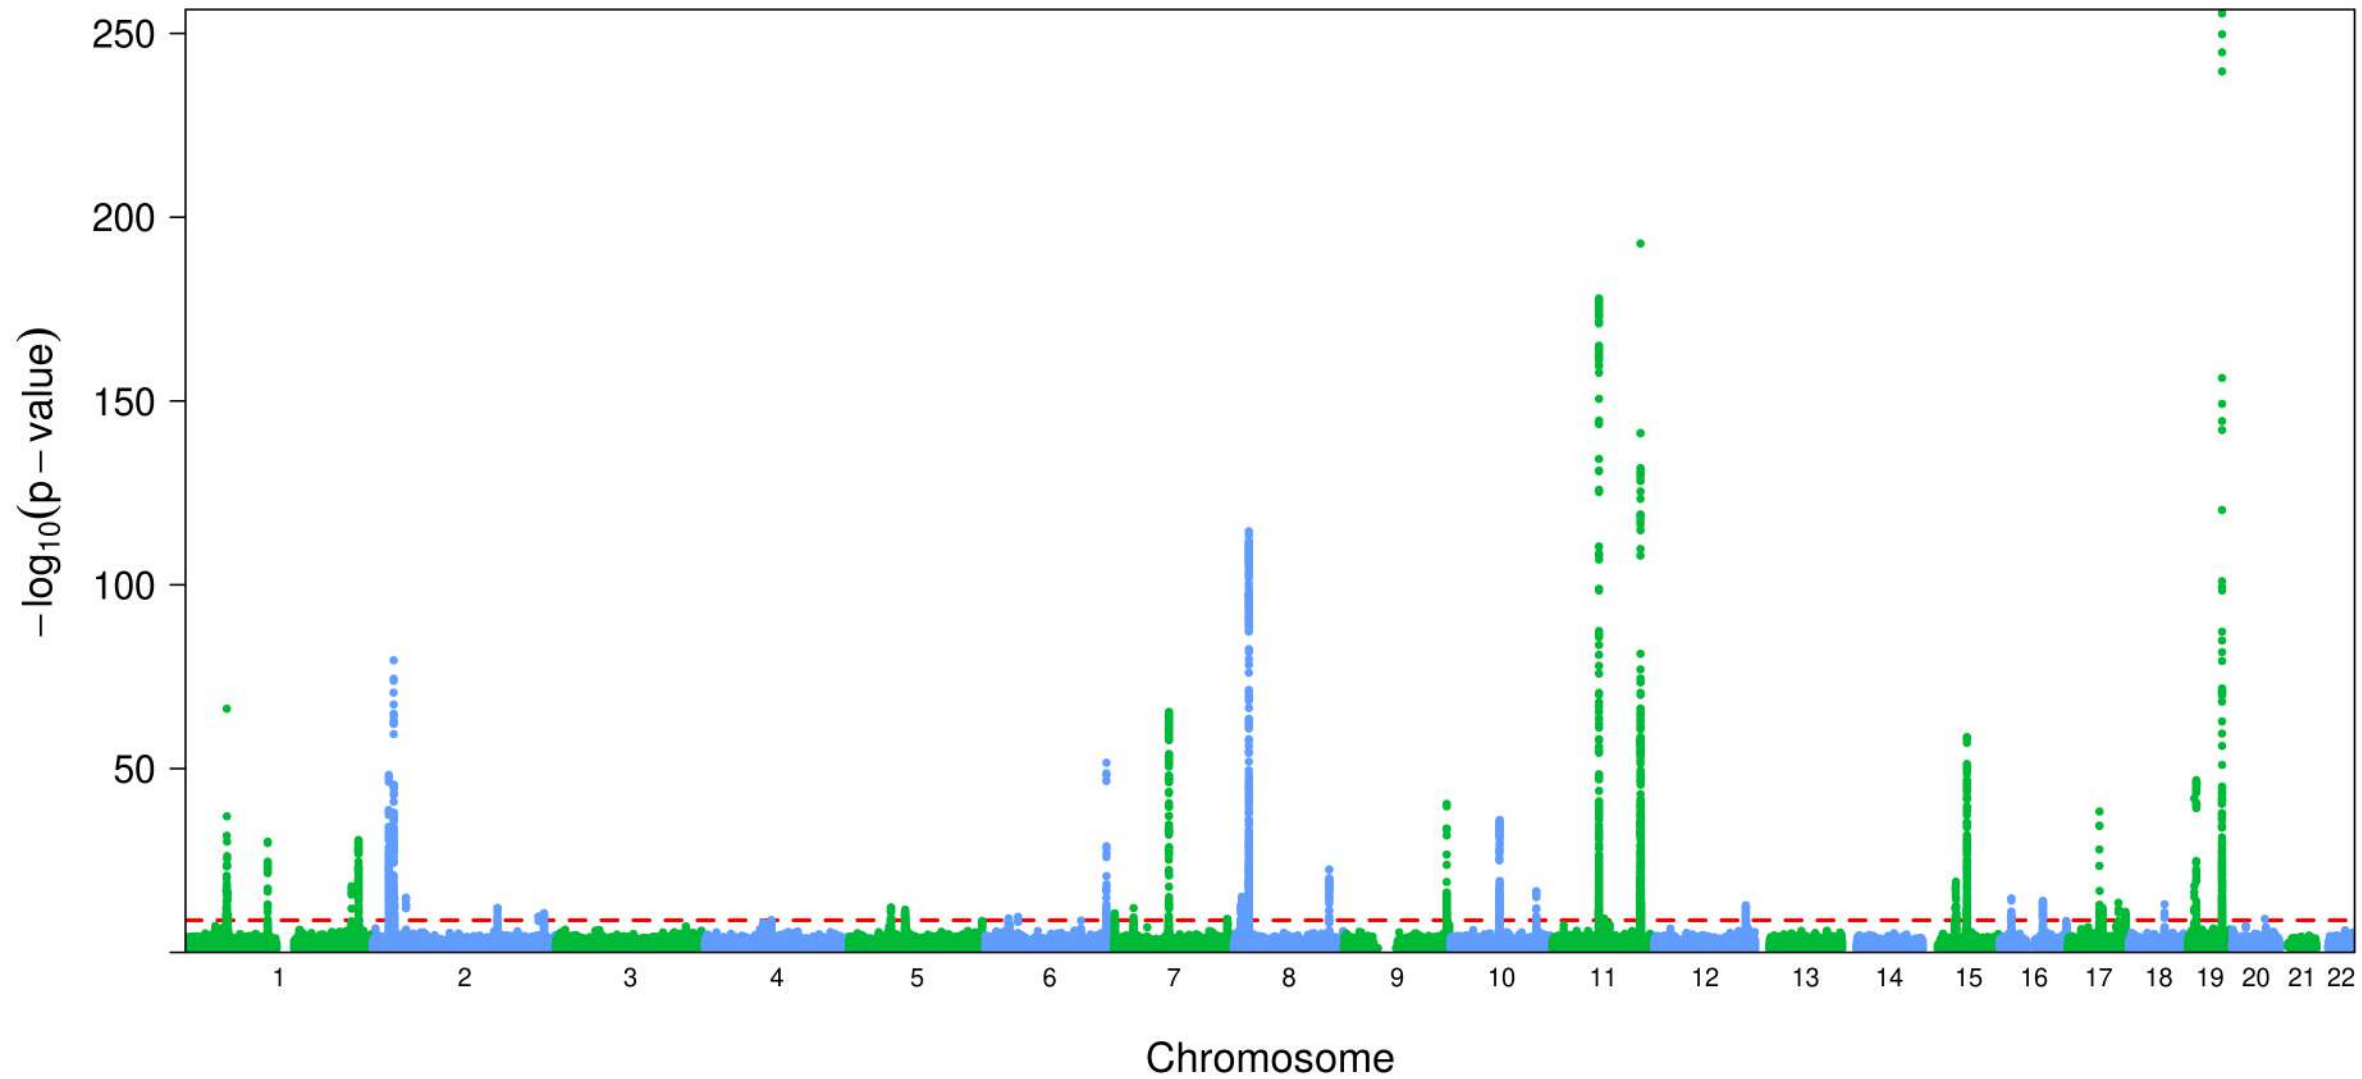

# Serum-C

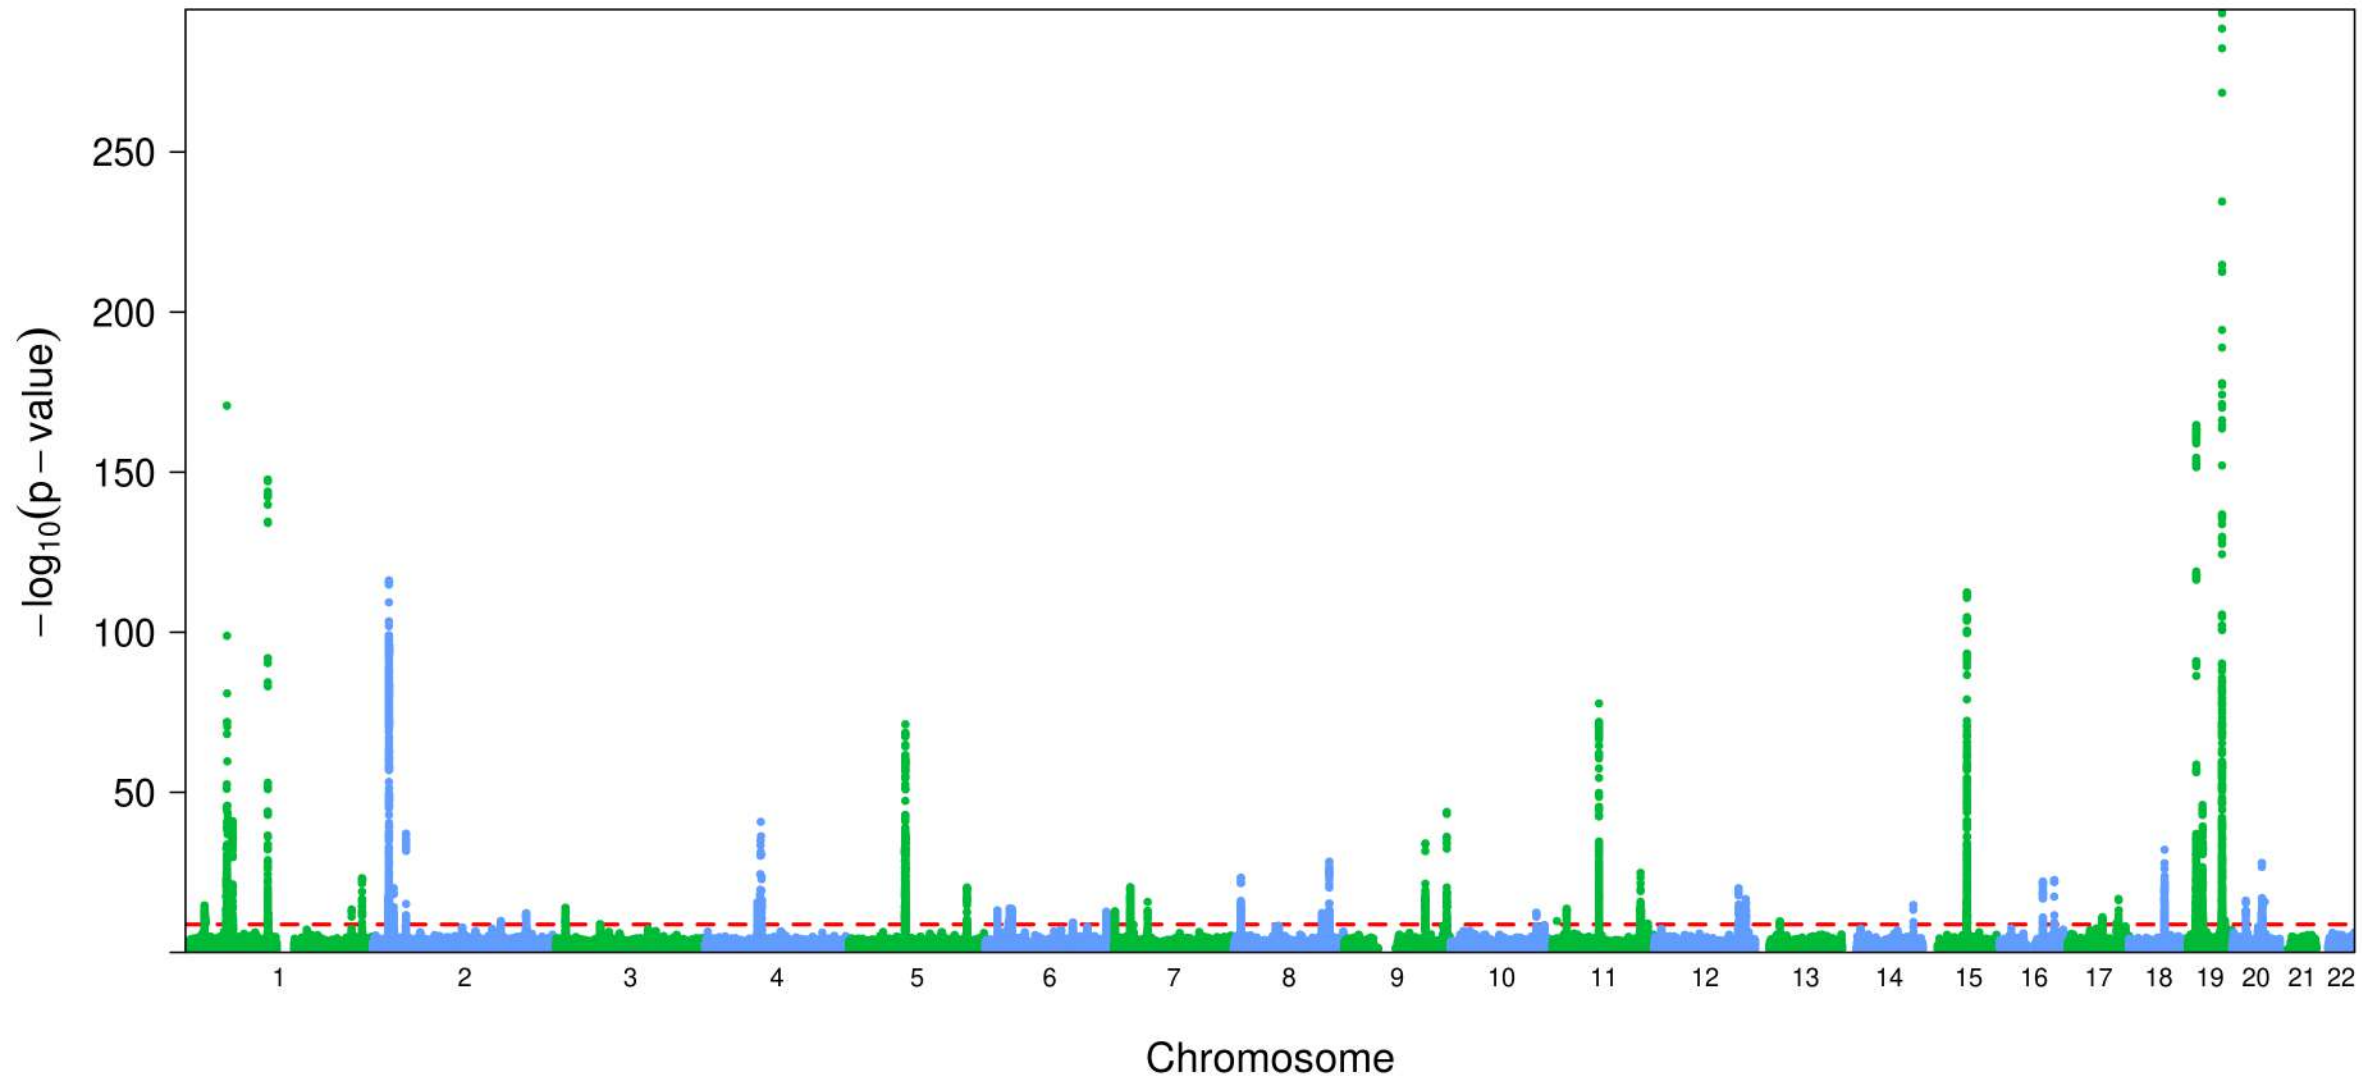

# Serum-TG

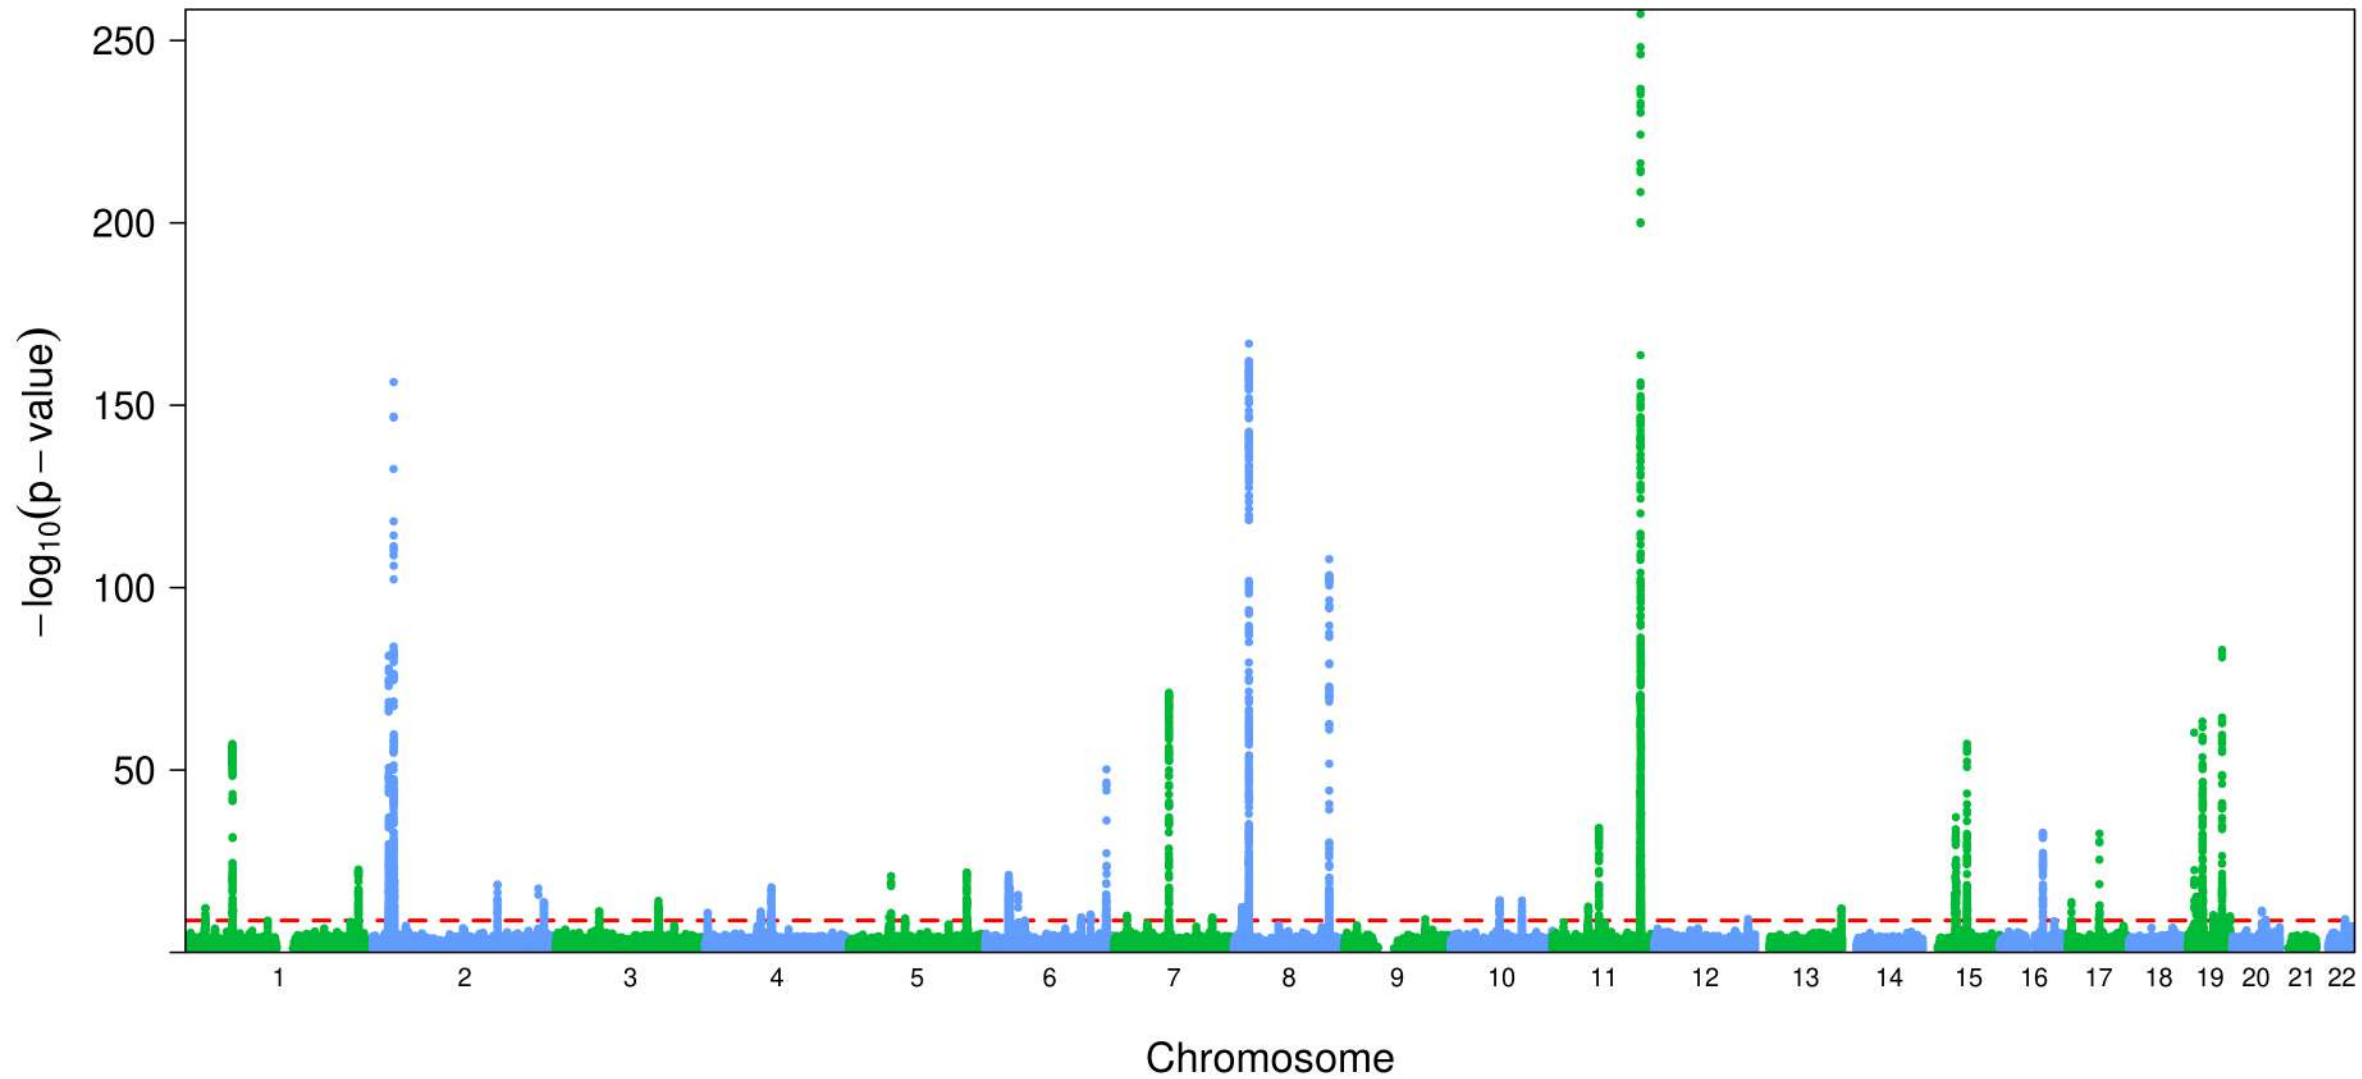

# SFA

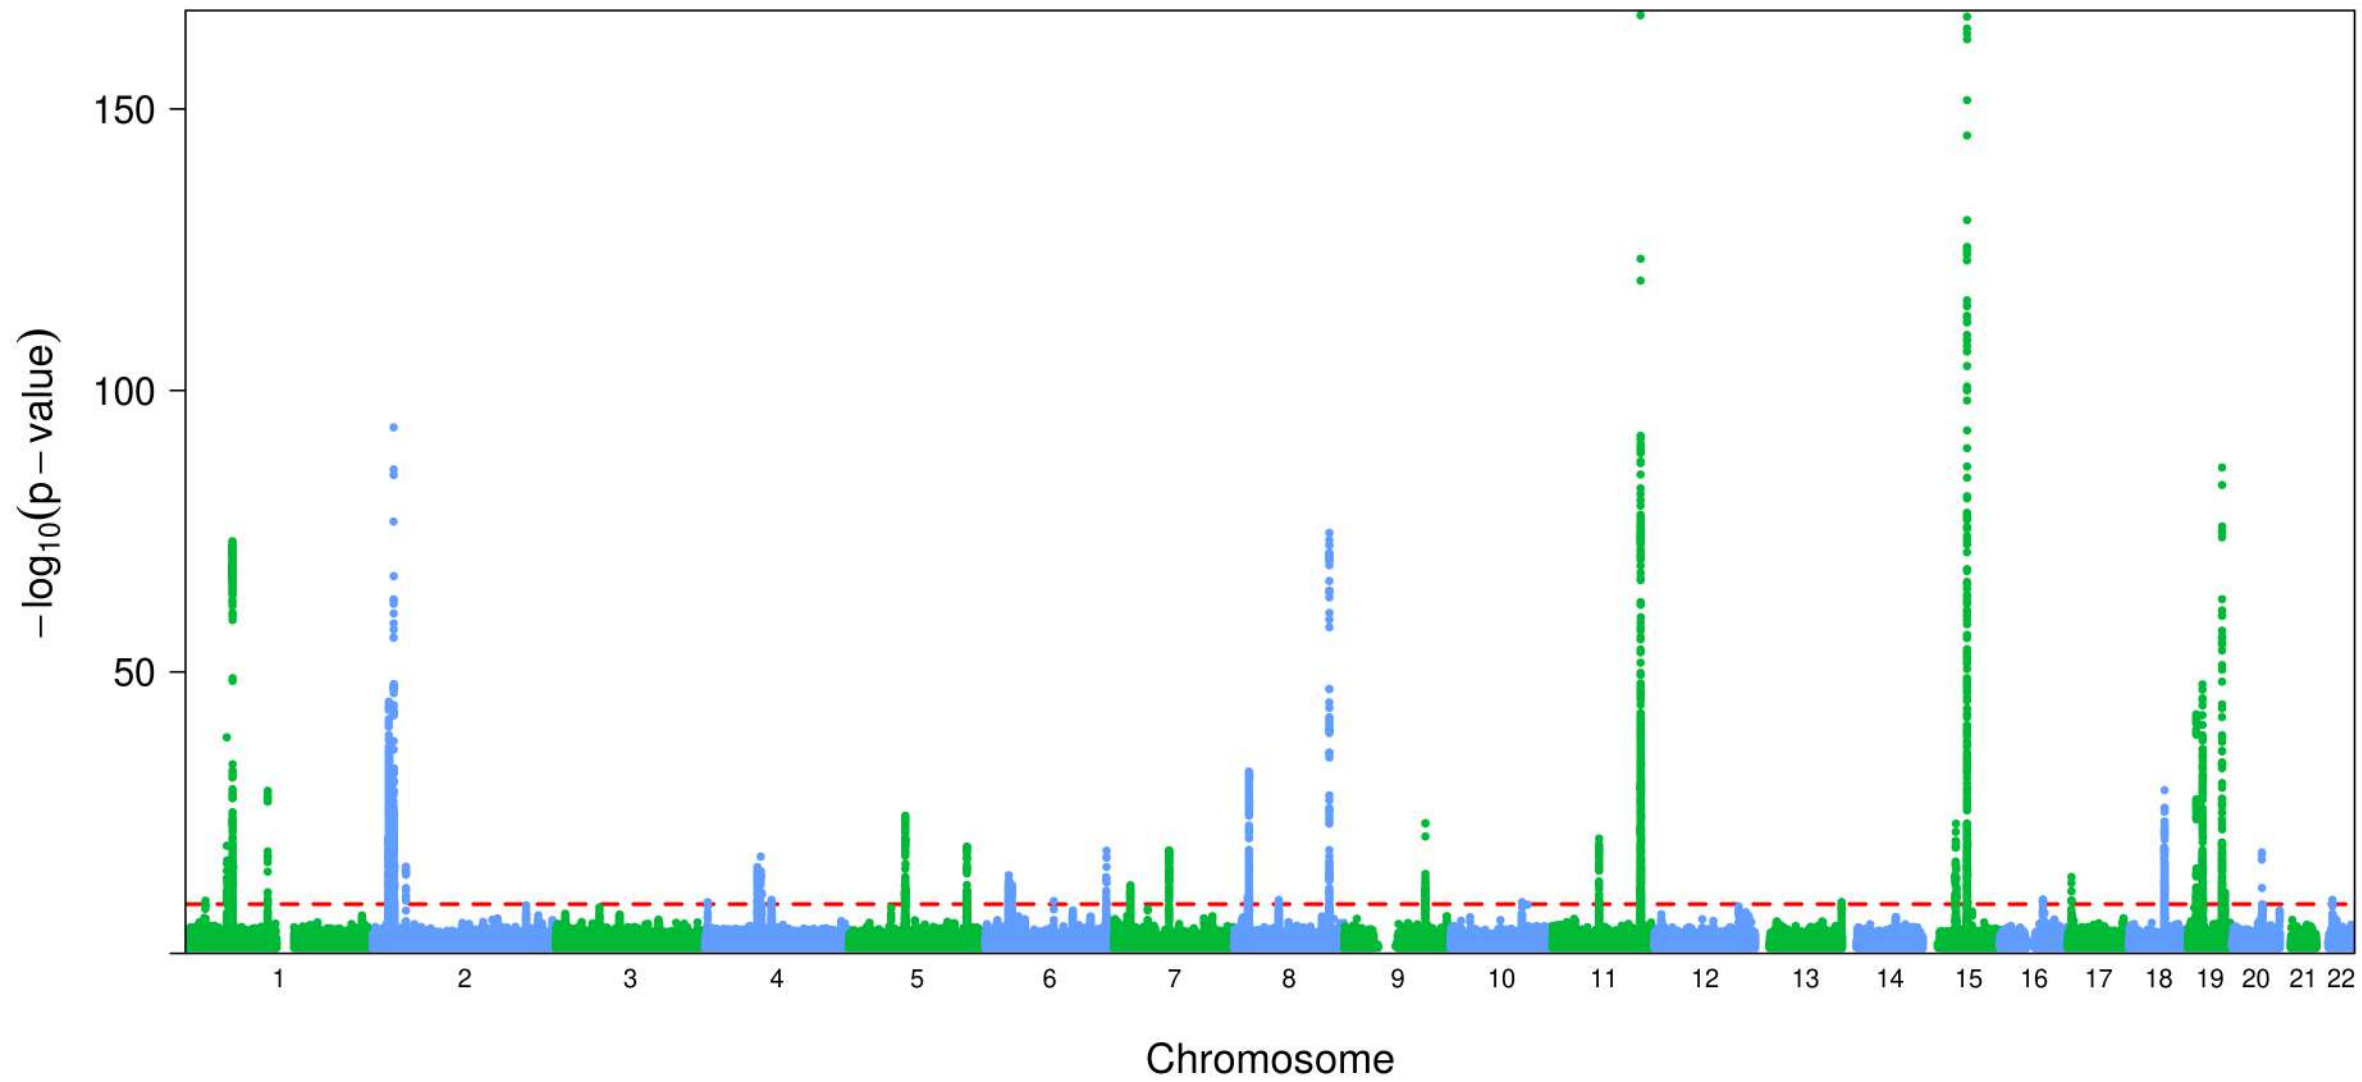

# SFAbyFA

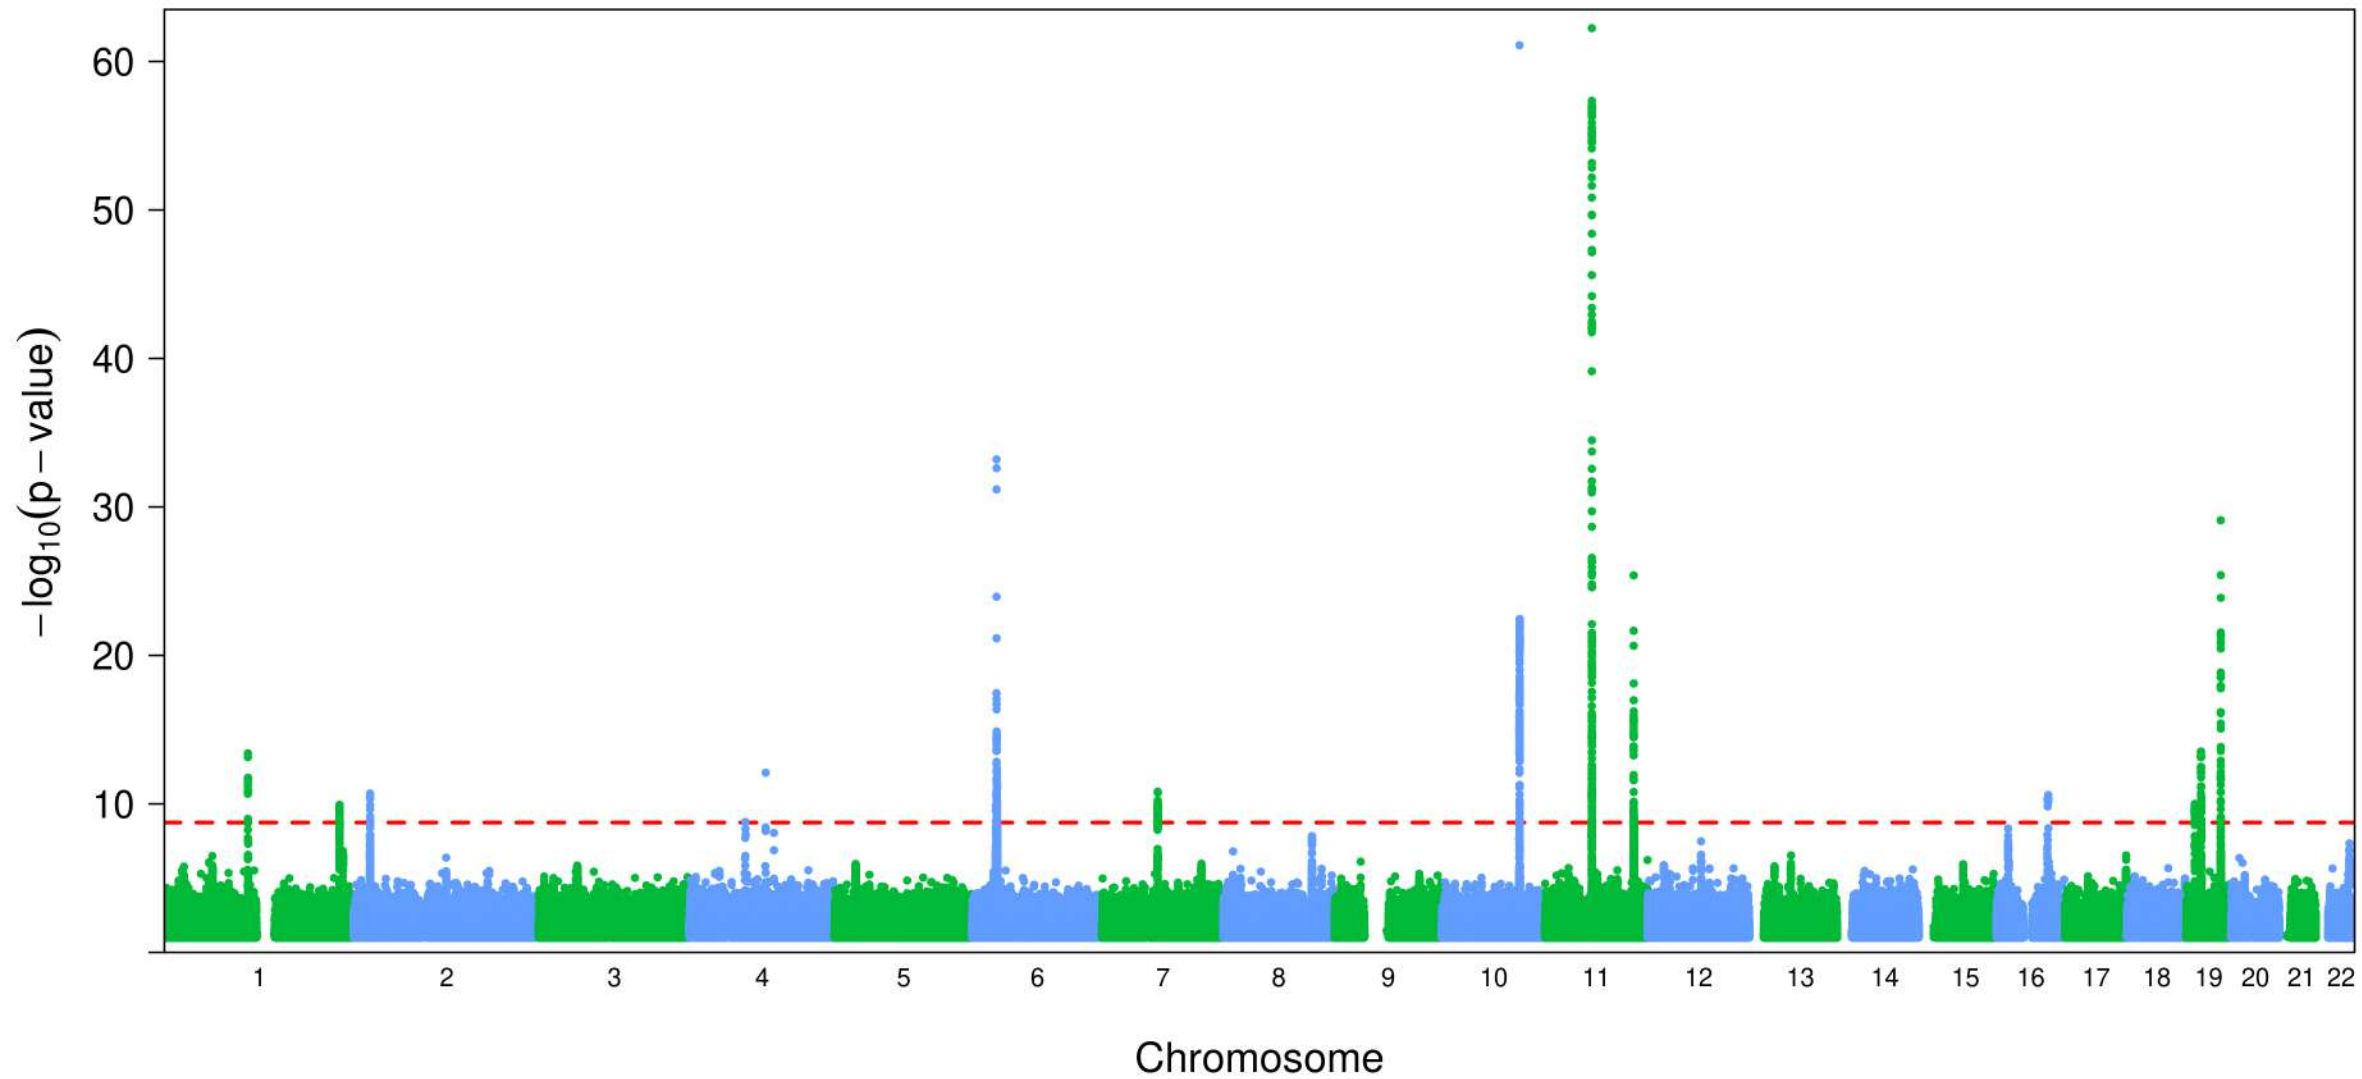

# SM

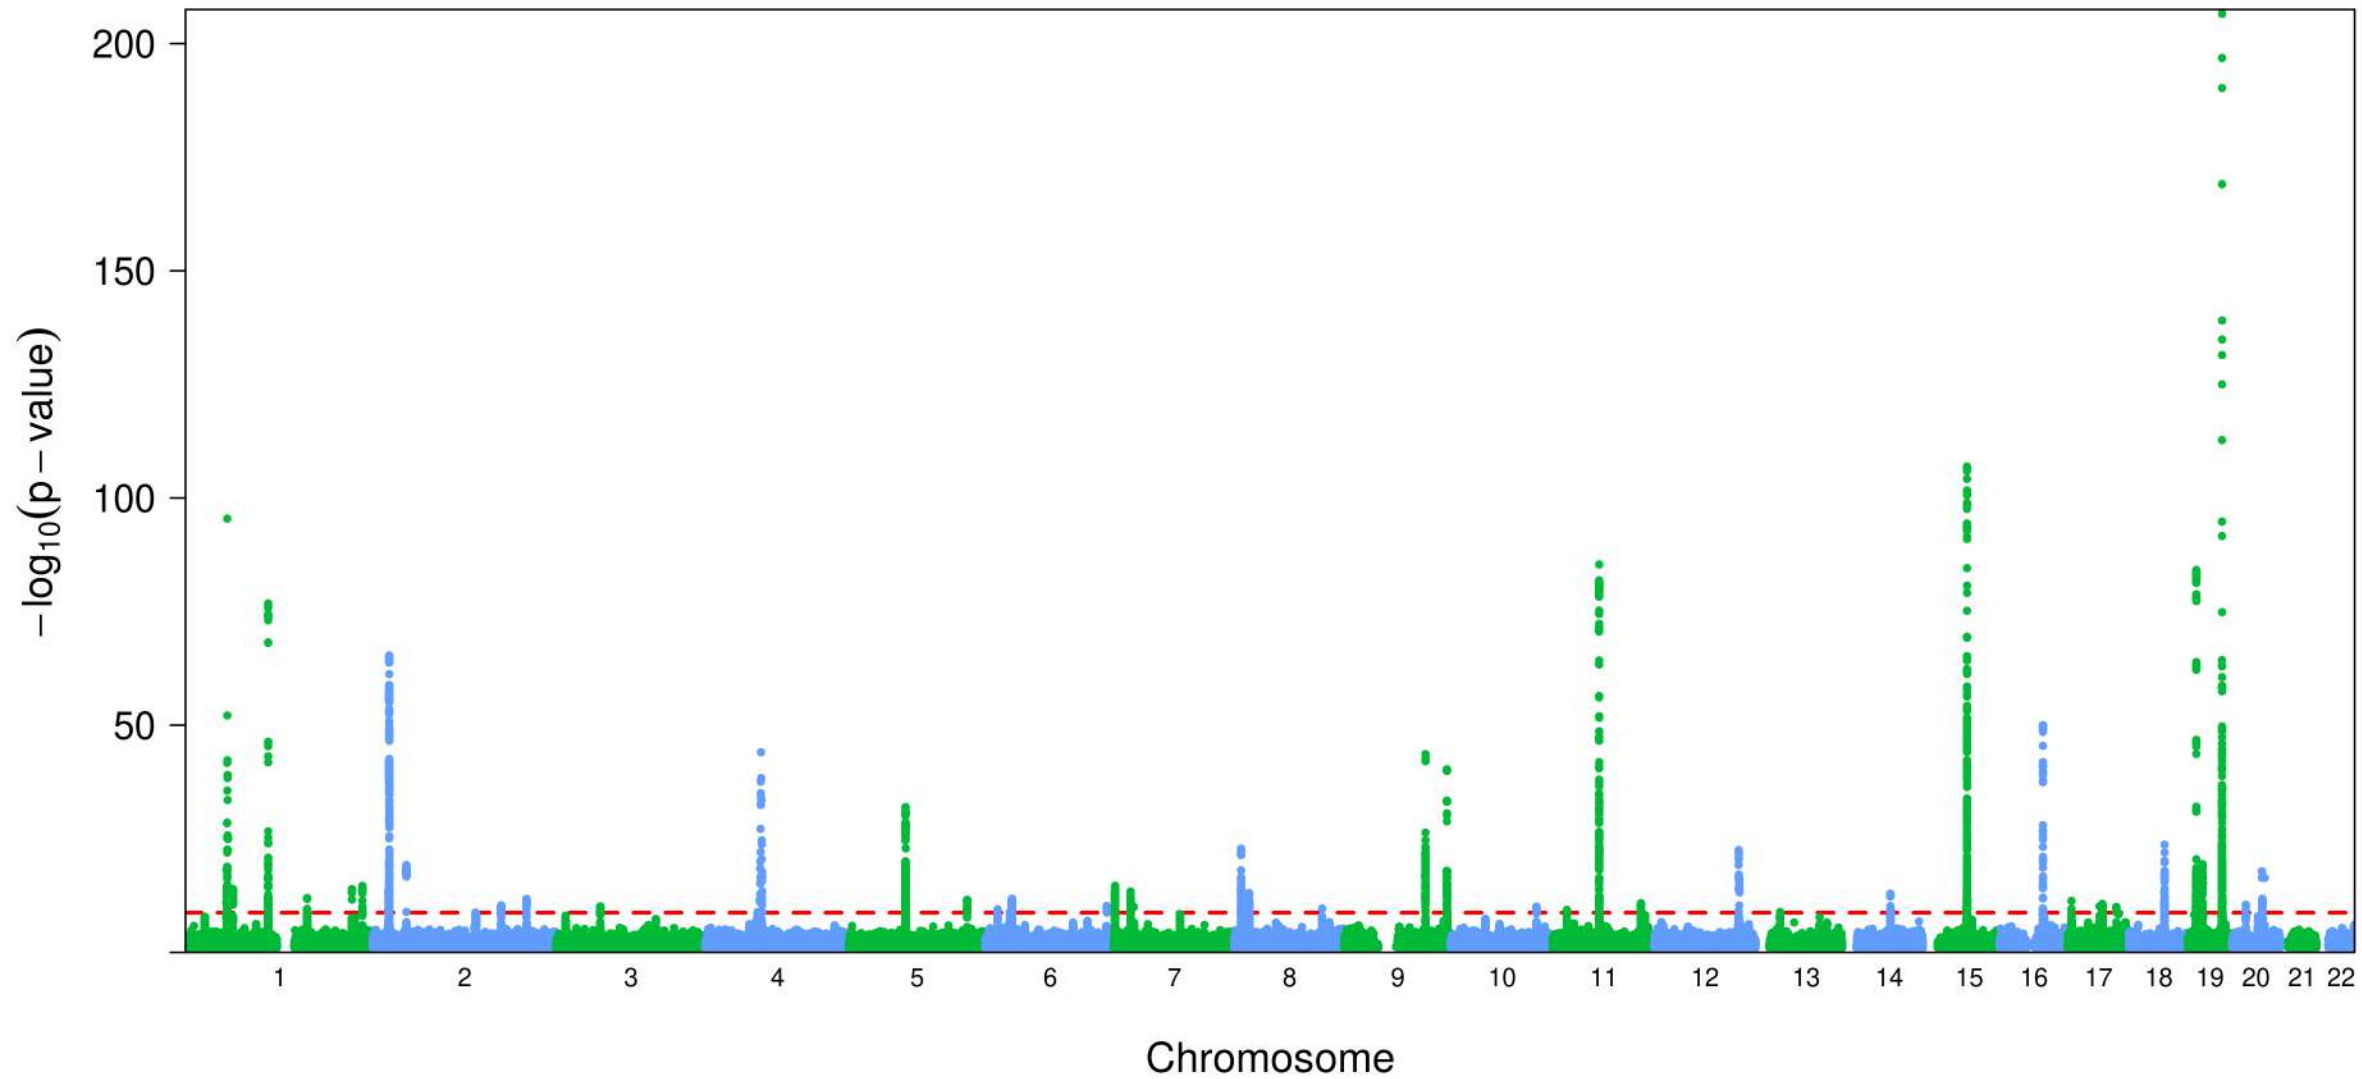

# TGbyPG

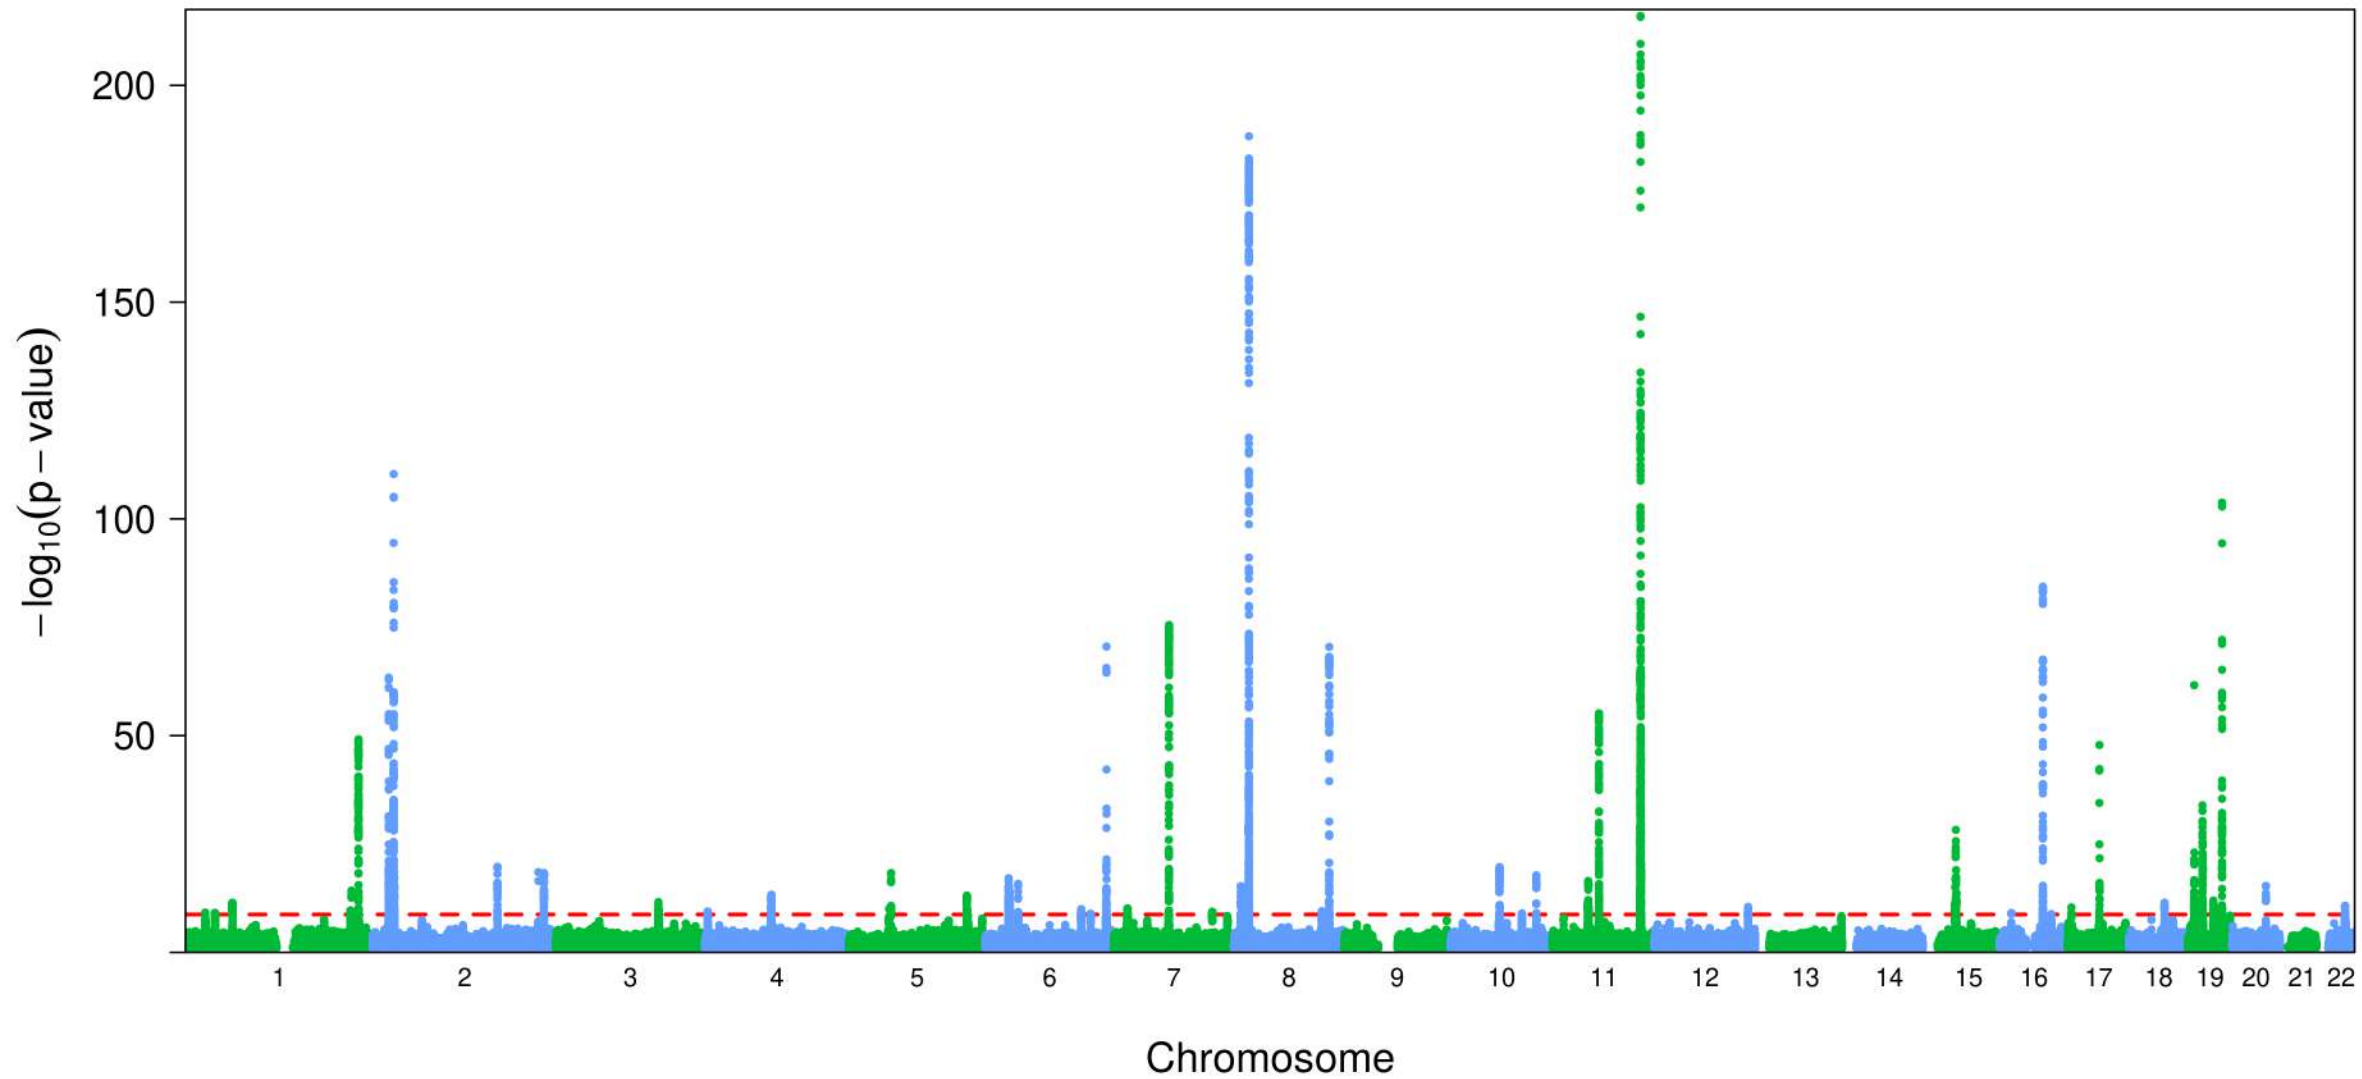



# TotCho

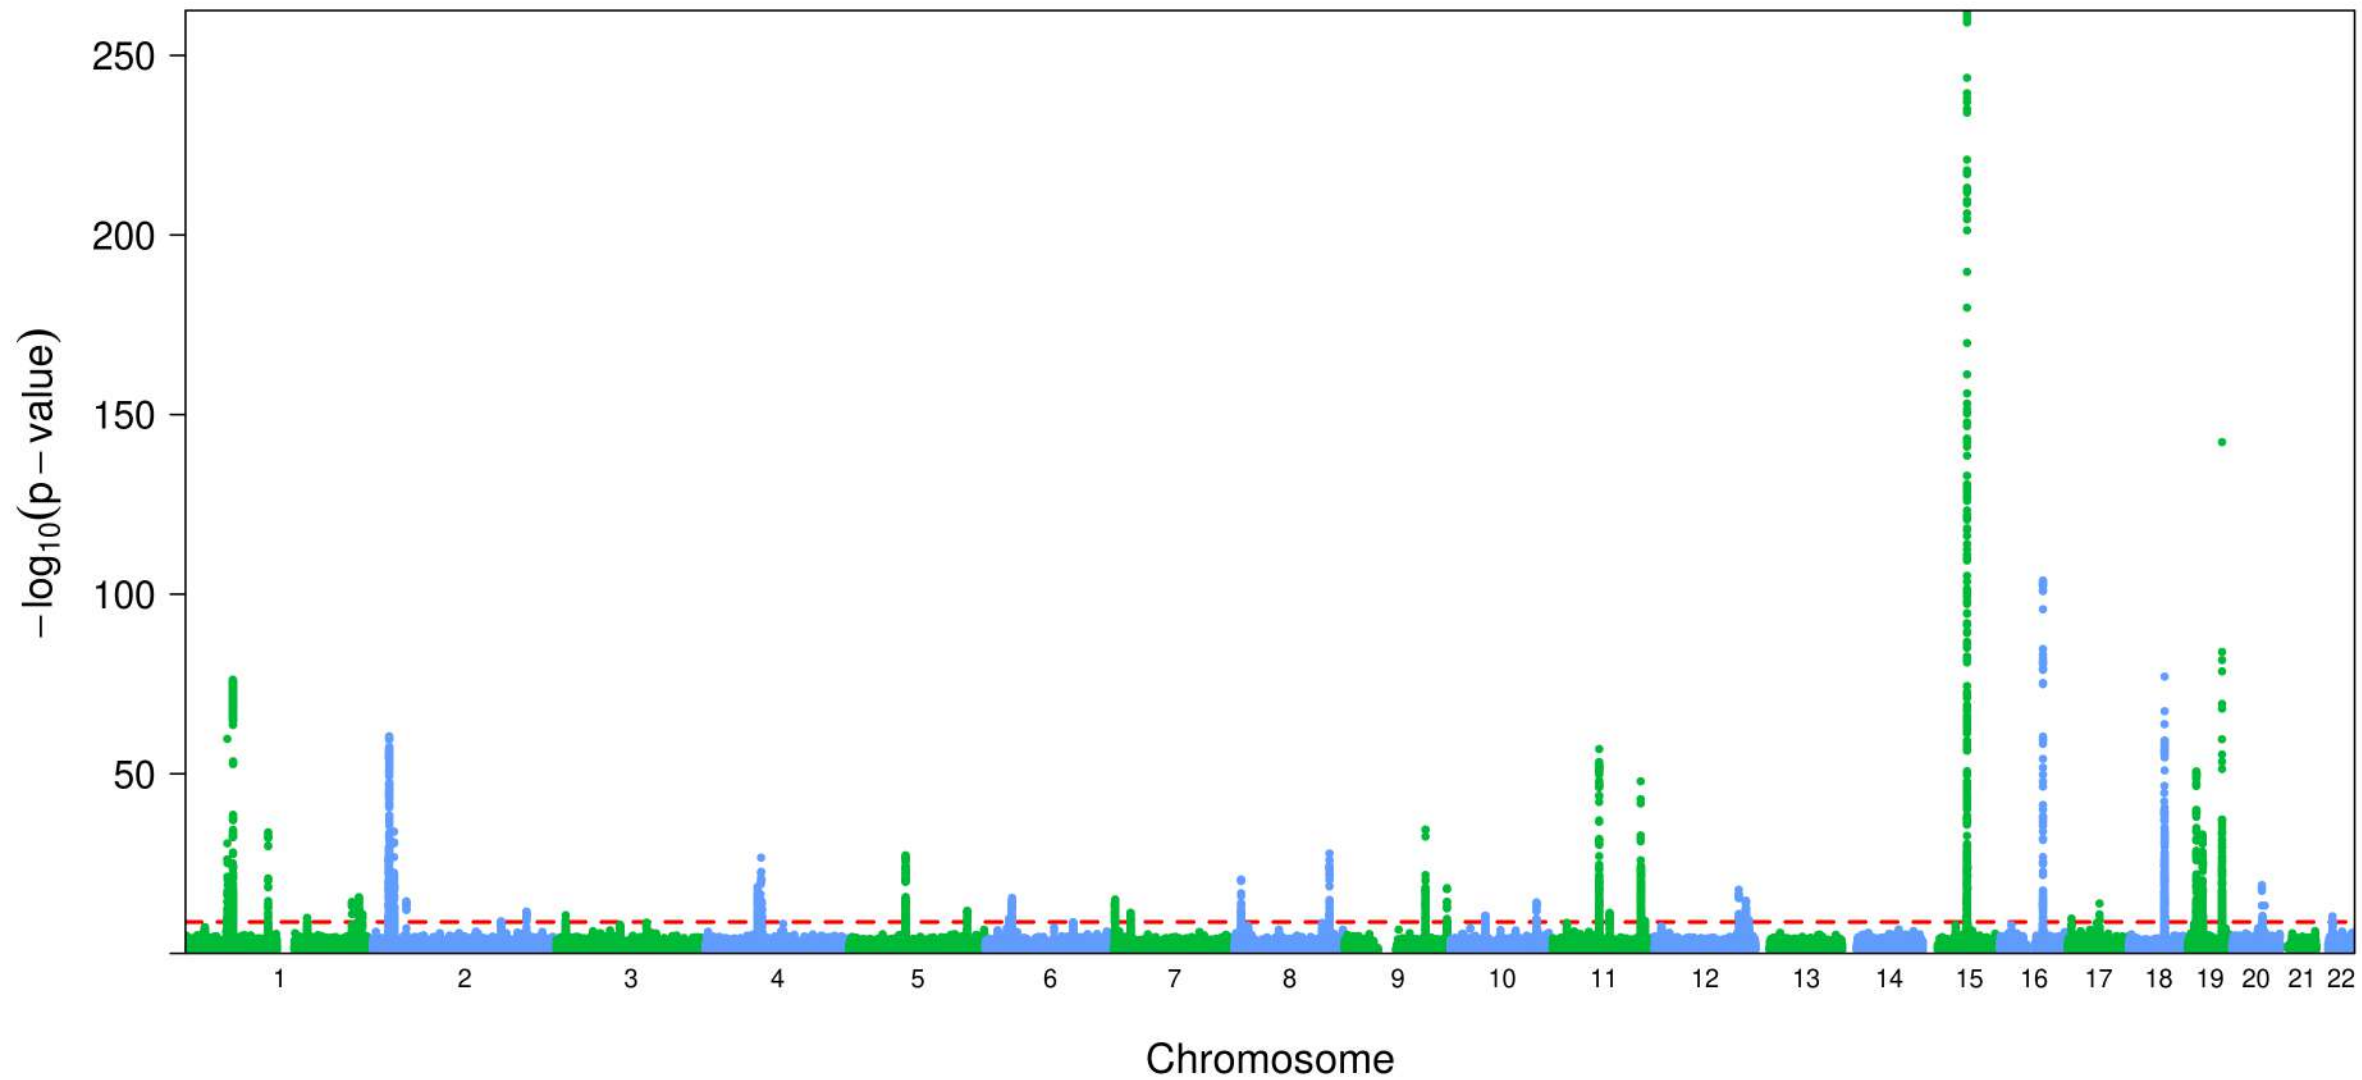

# TotFA

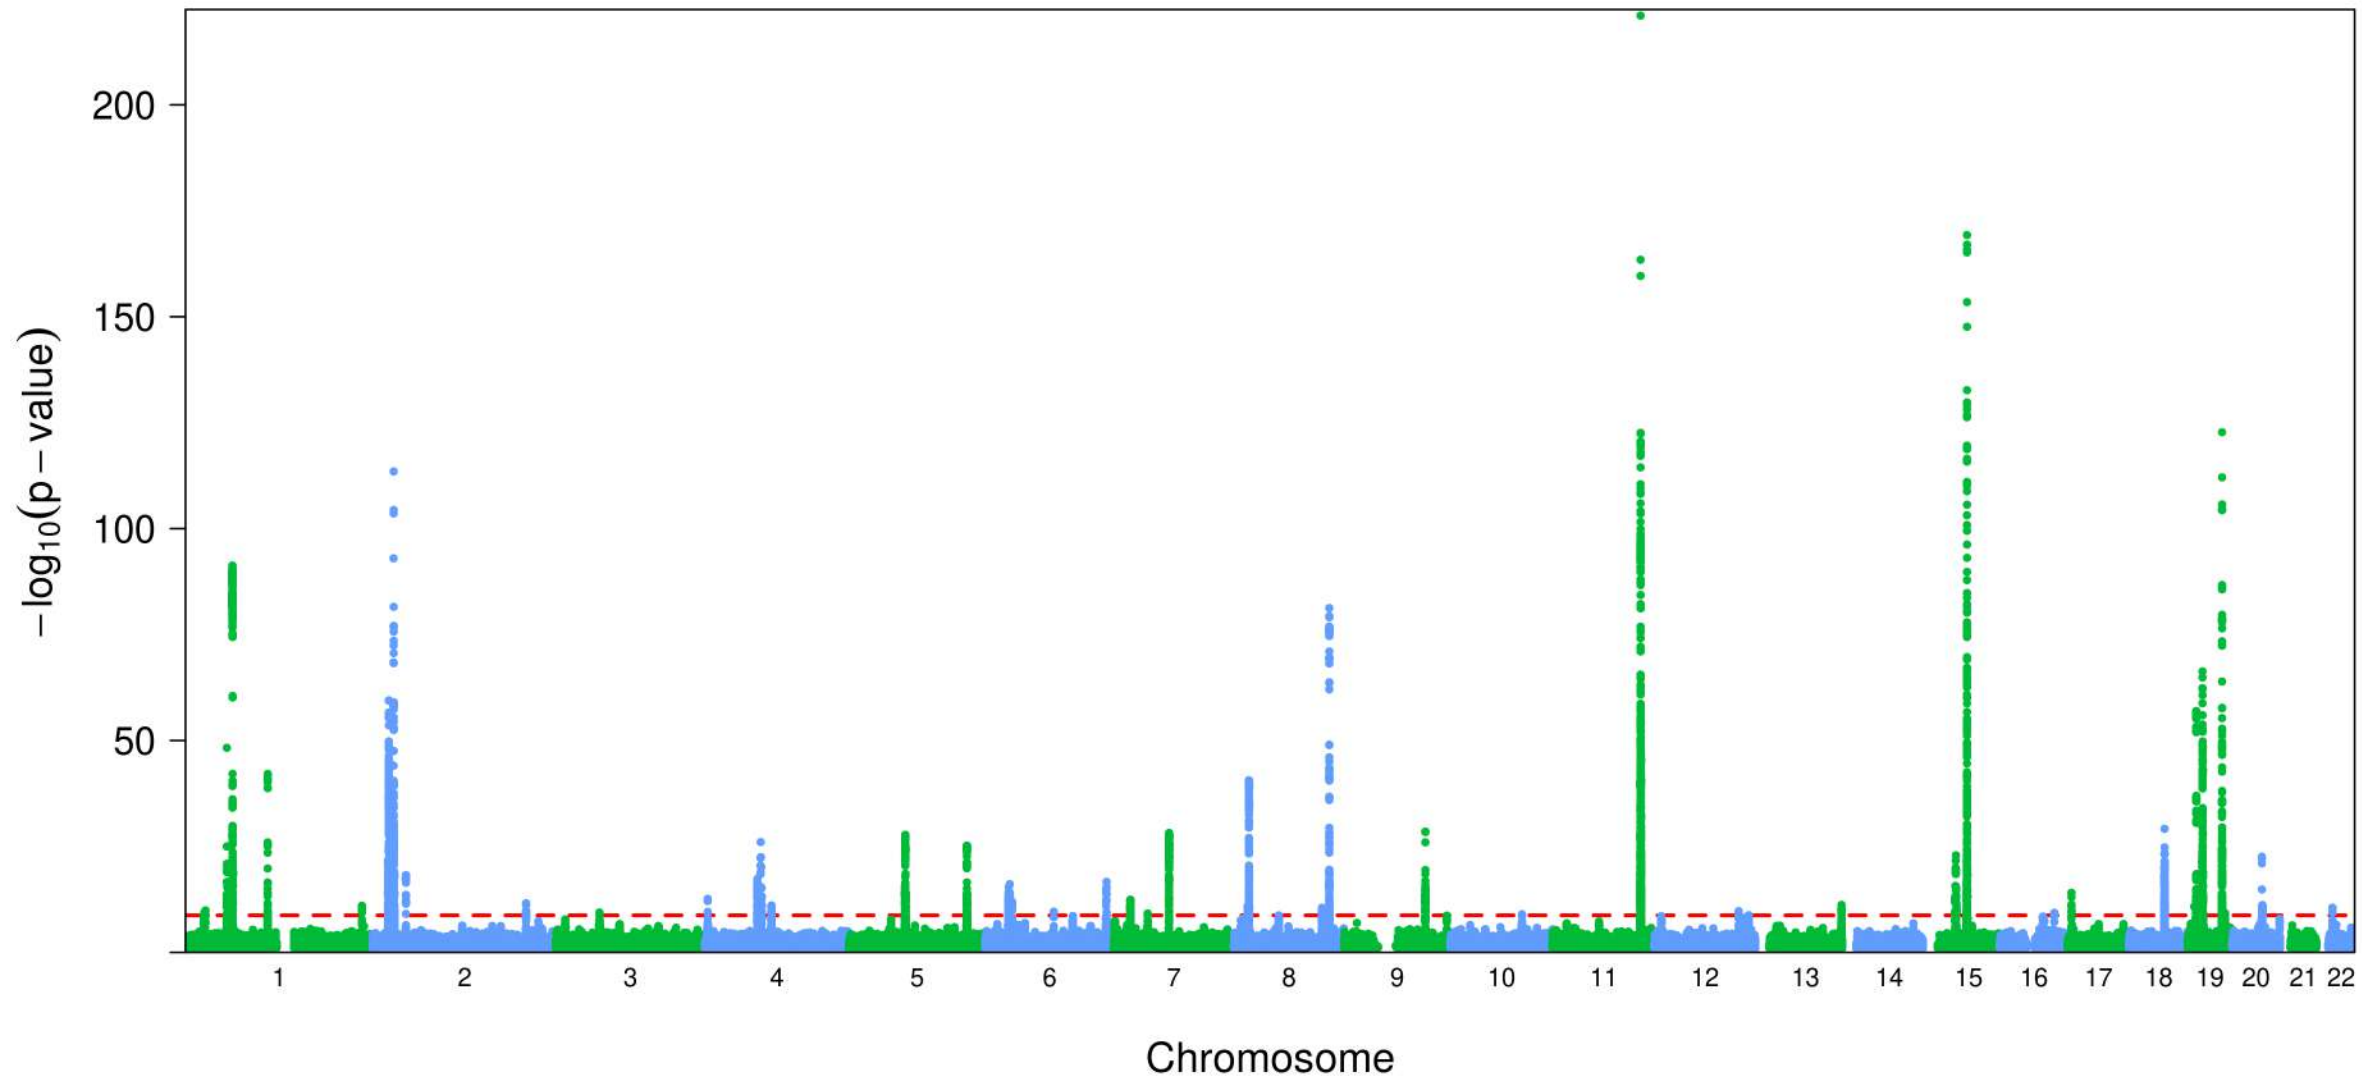

# TotPG

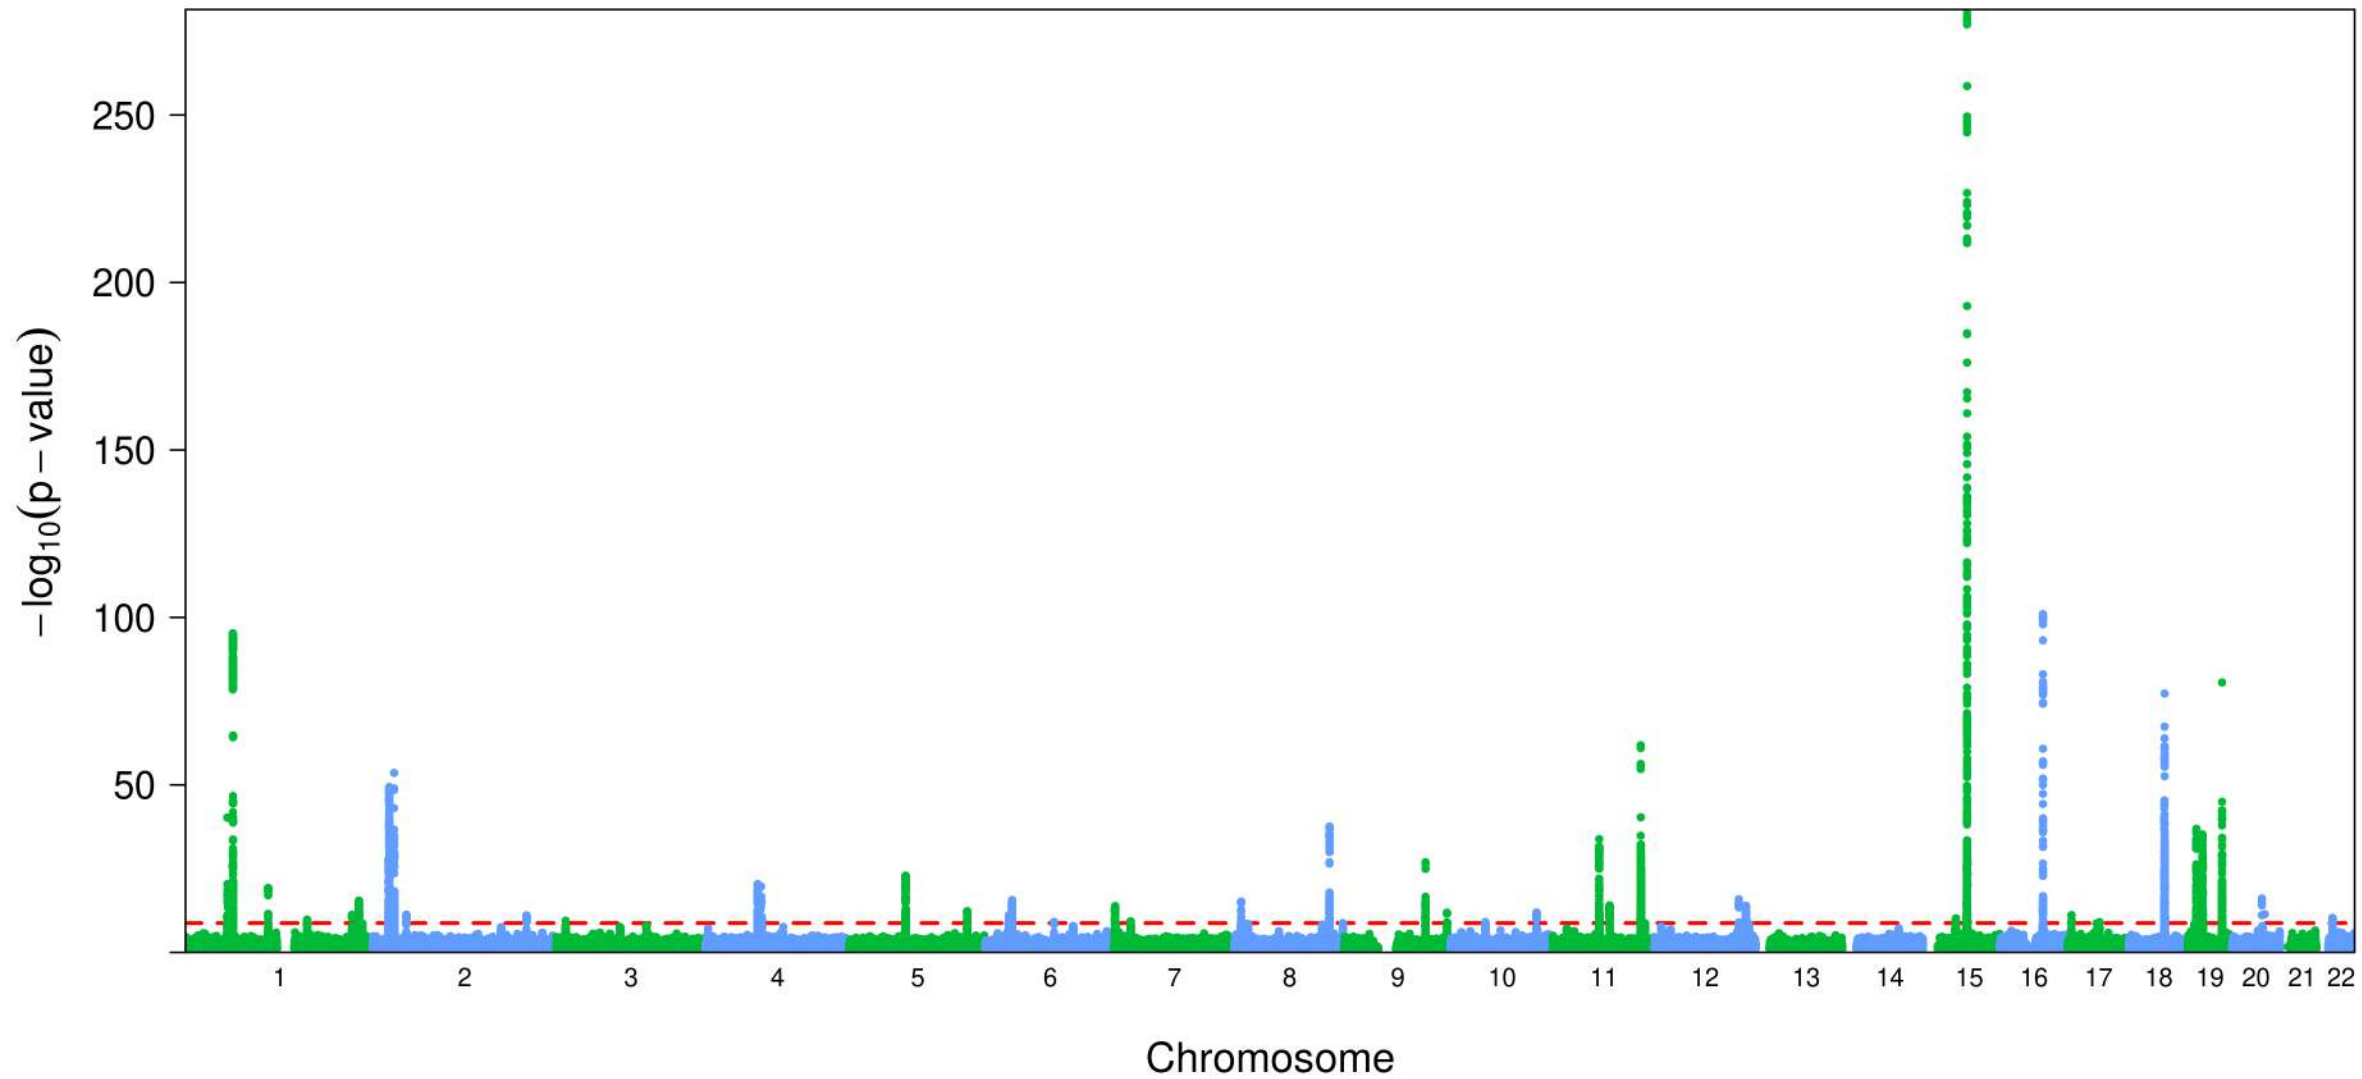

# Tyr

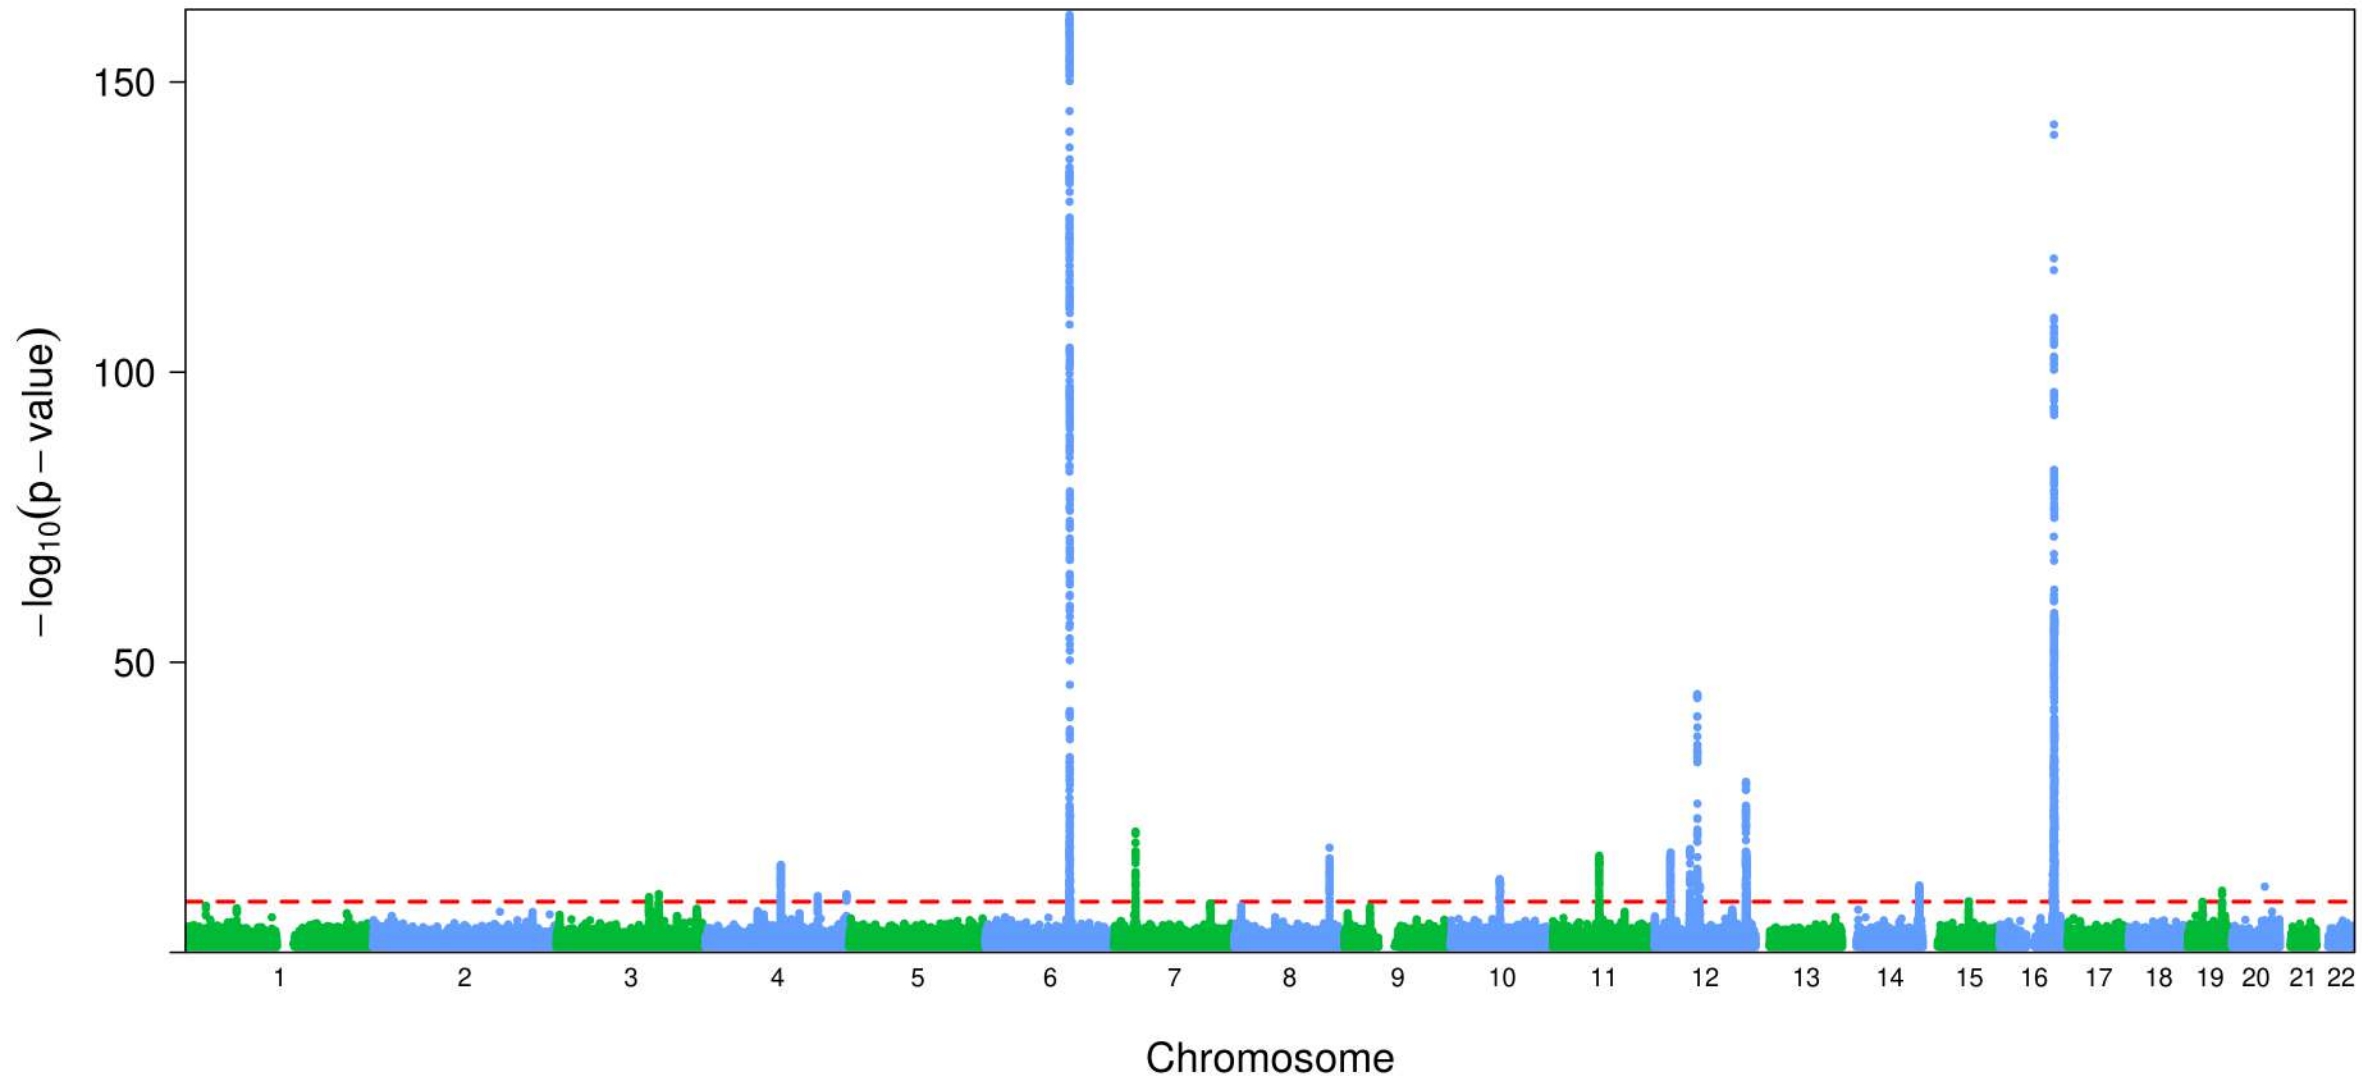

# UnsatDeg

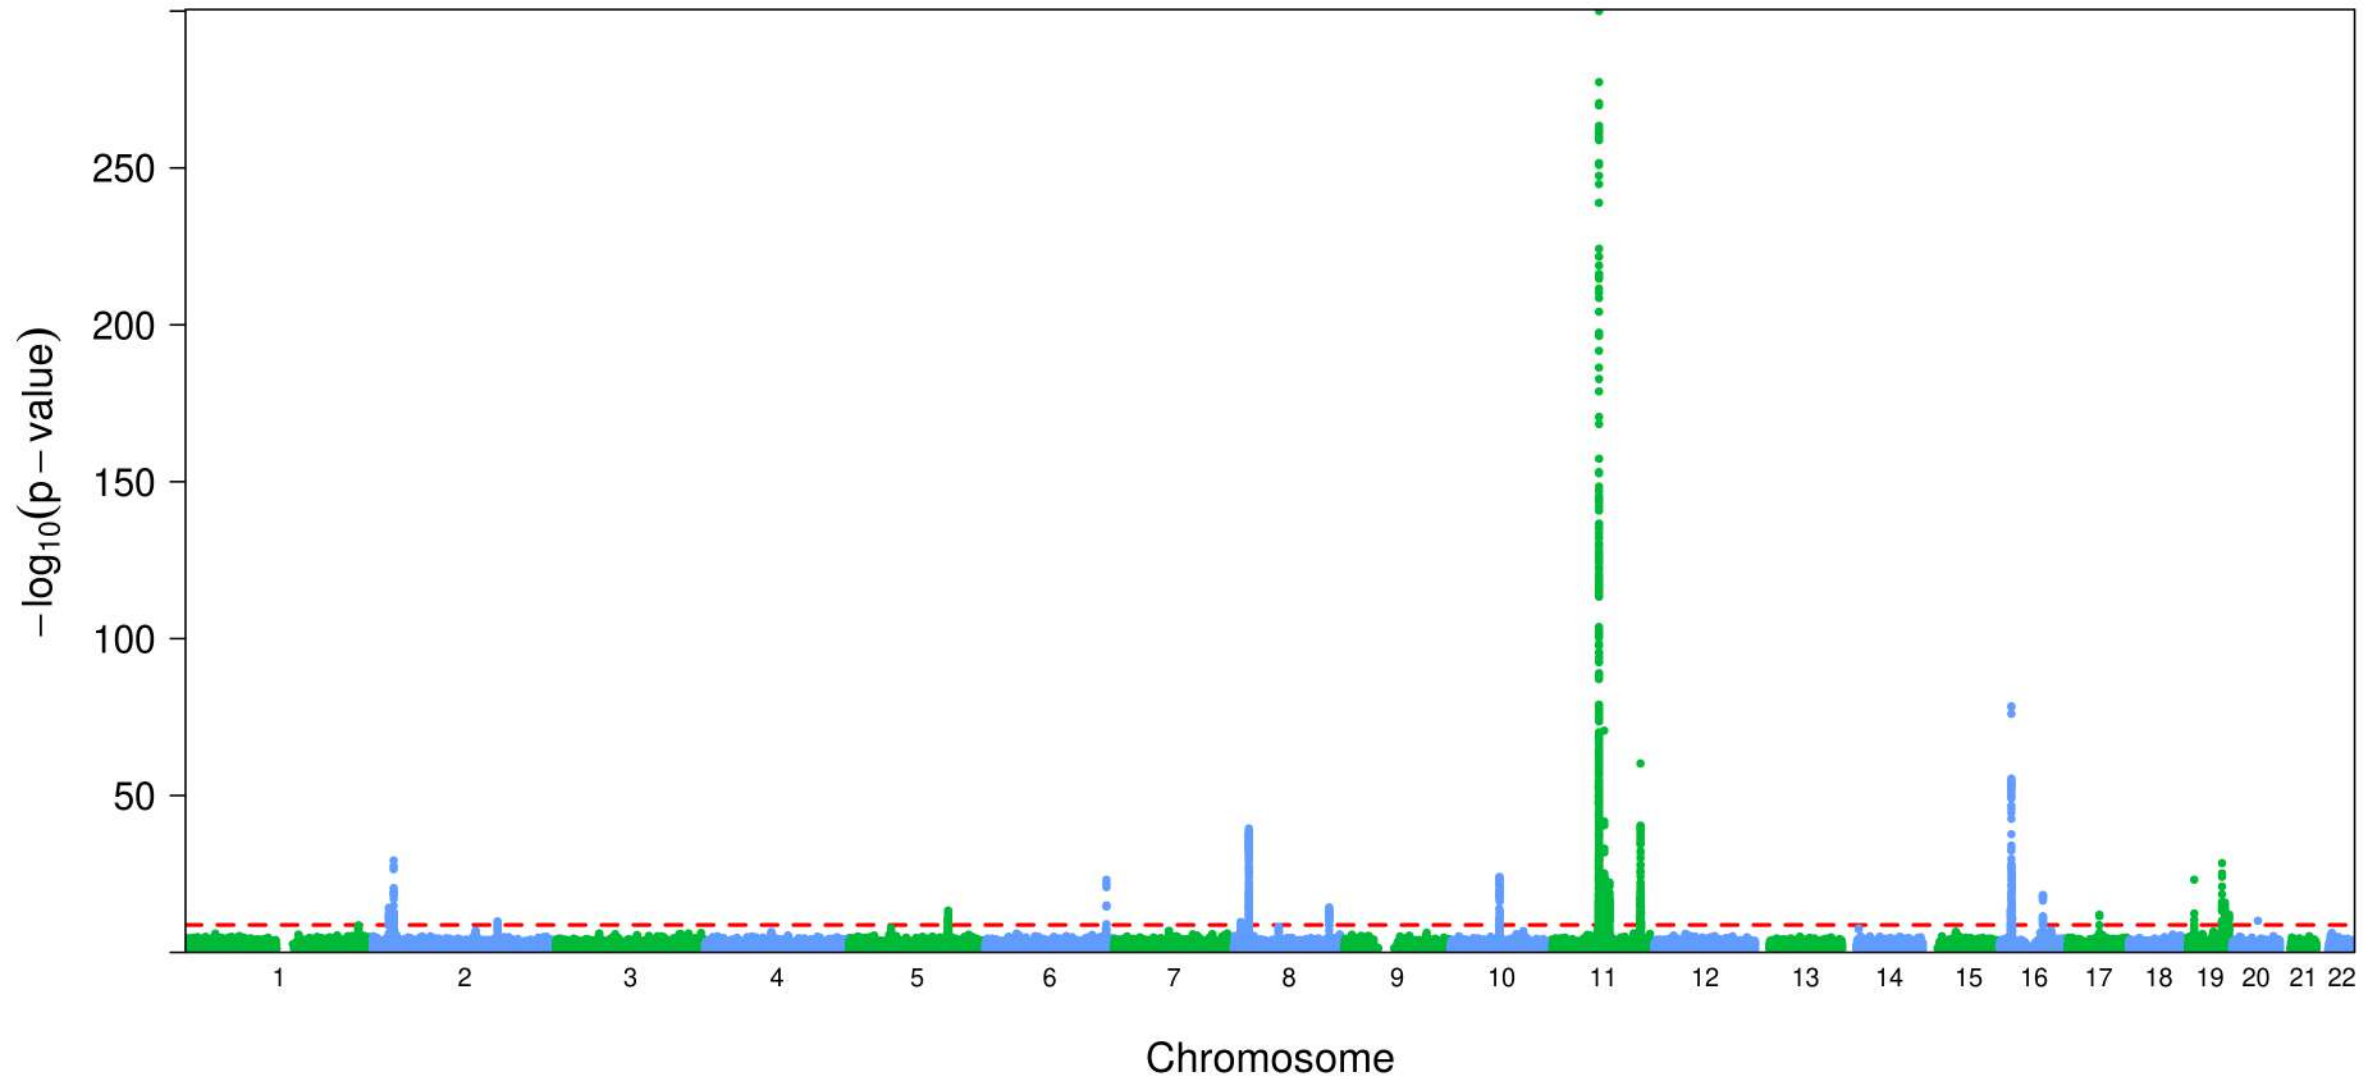

Val

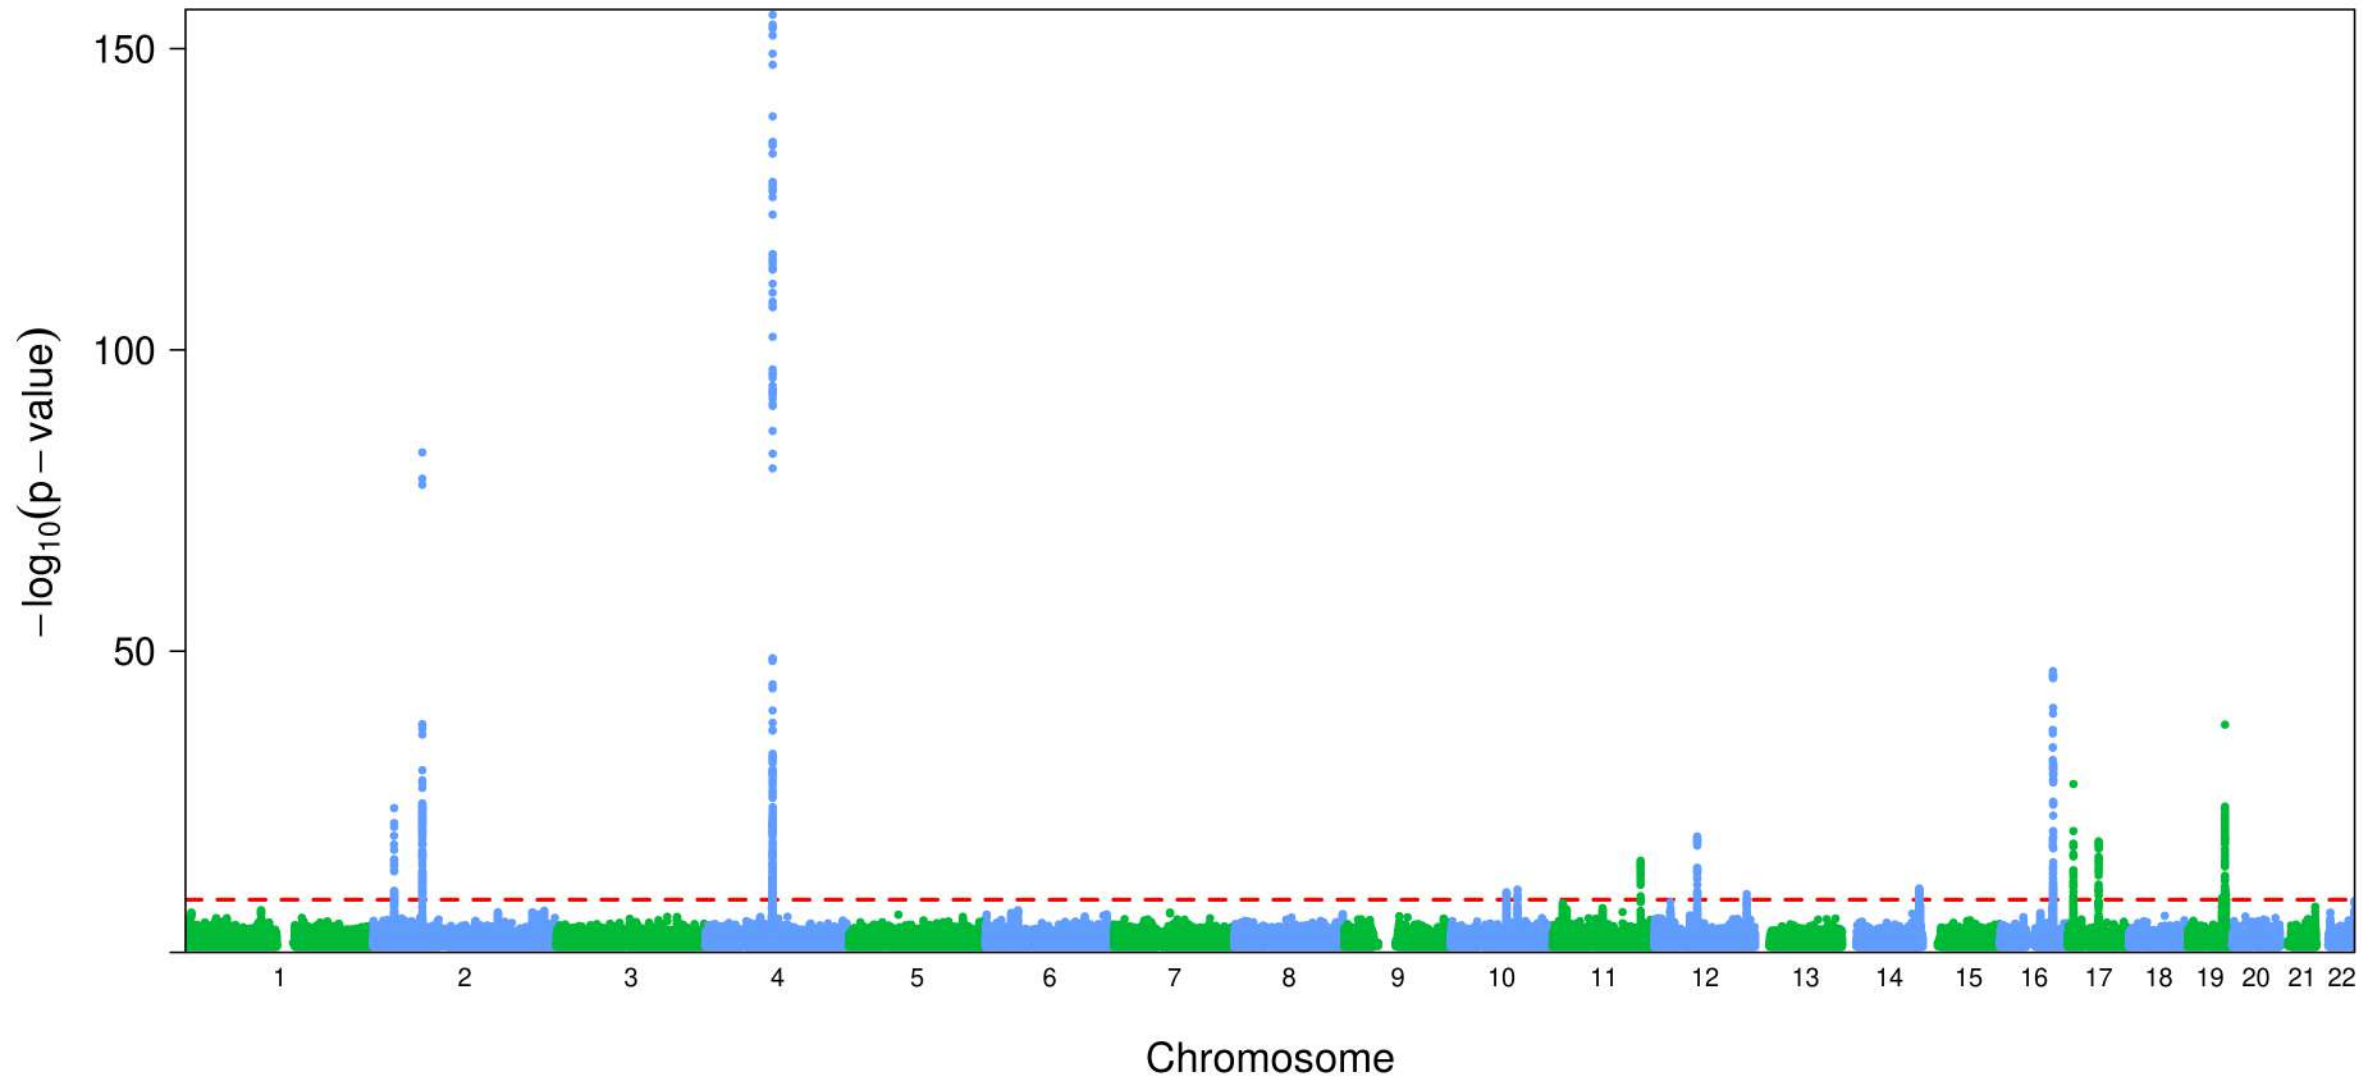

# VLDL-C

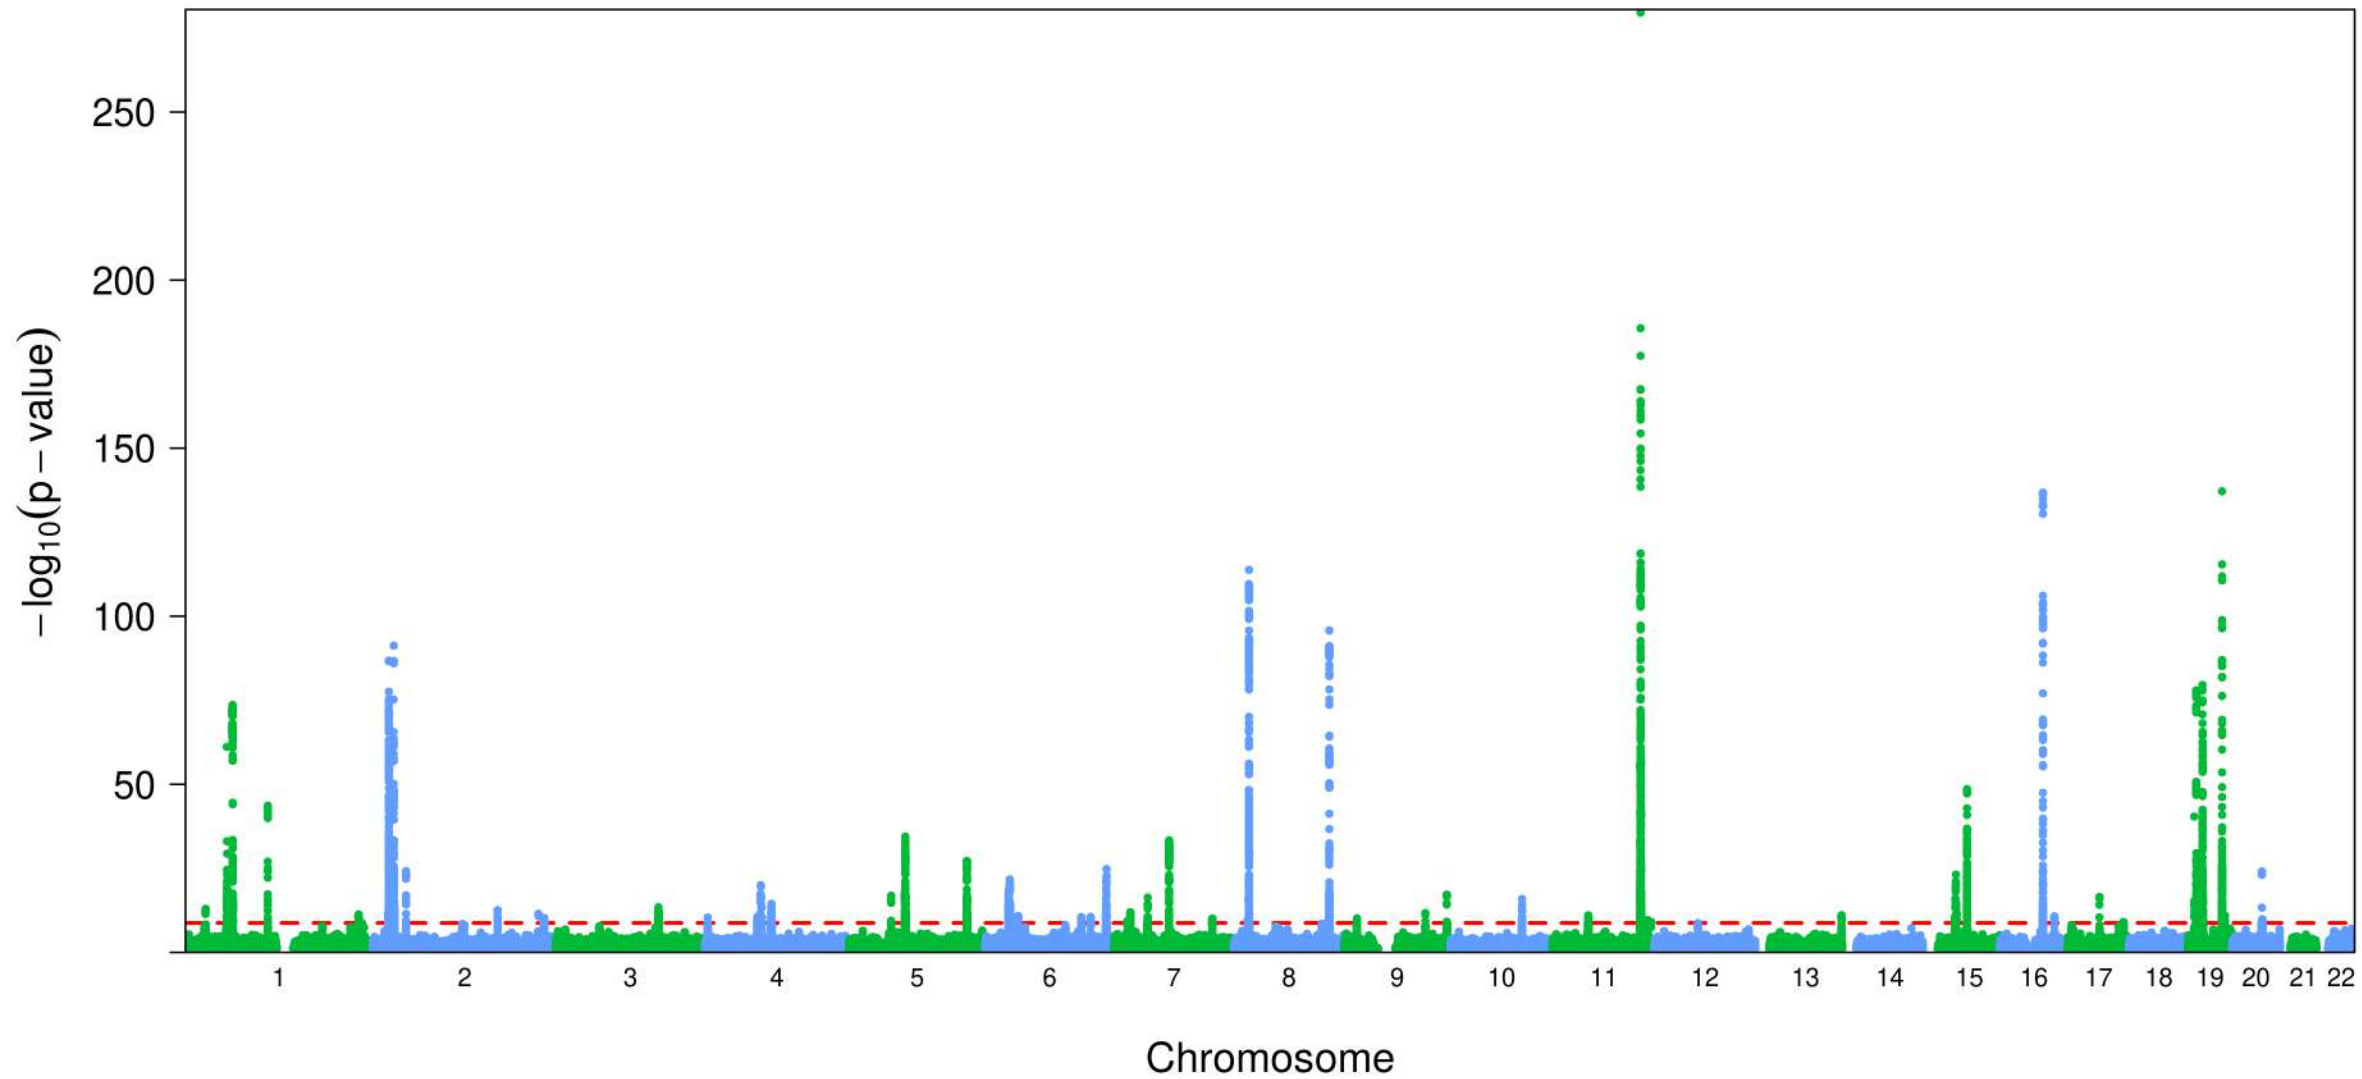

## VLDL-D

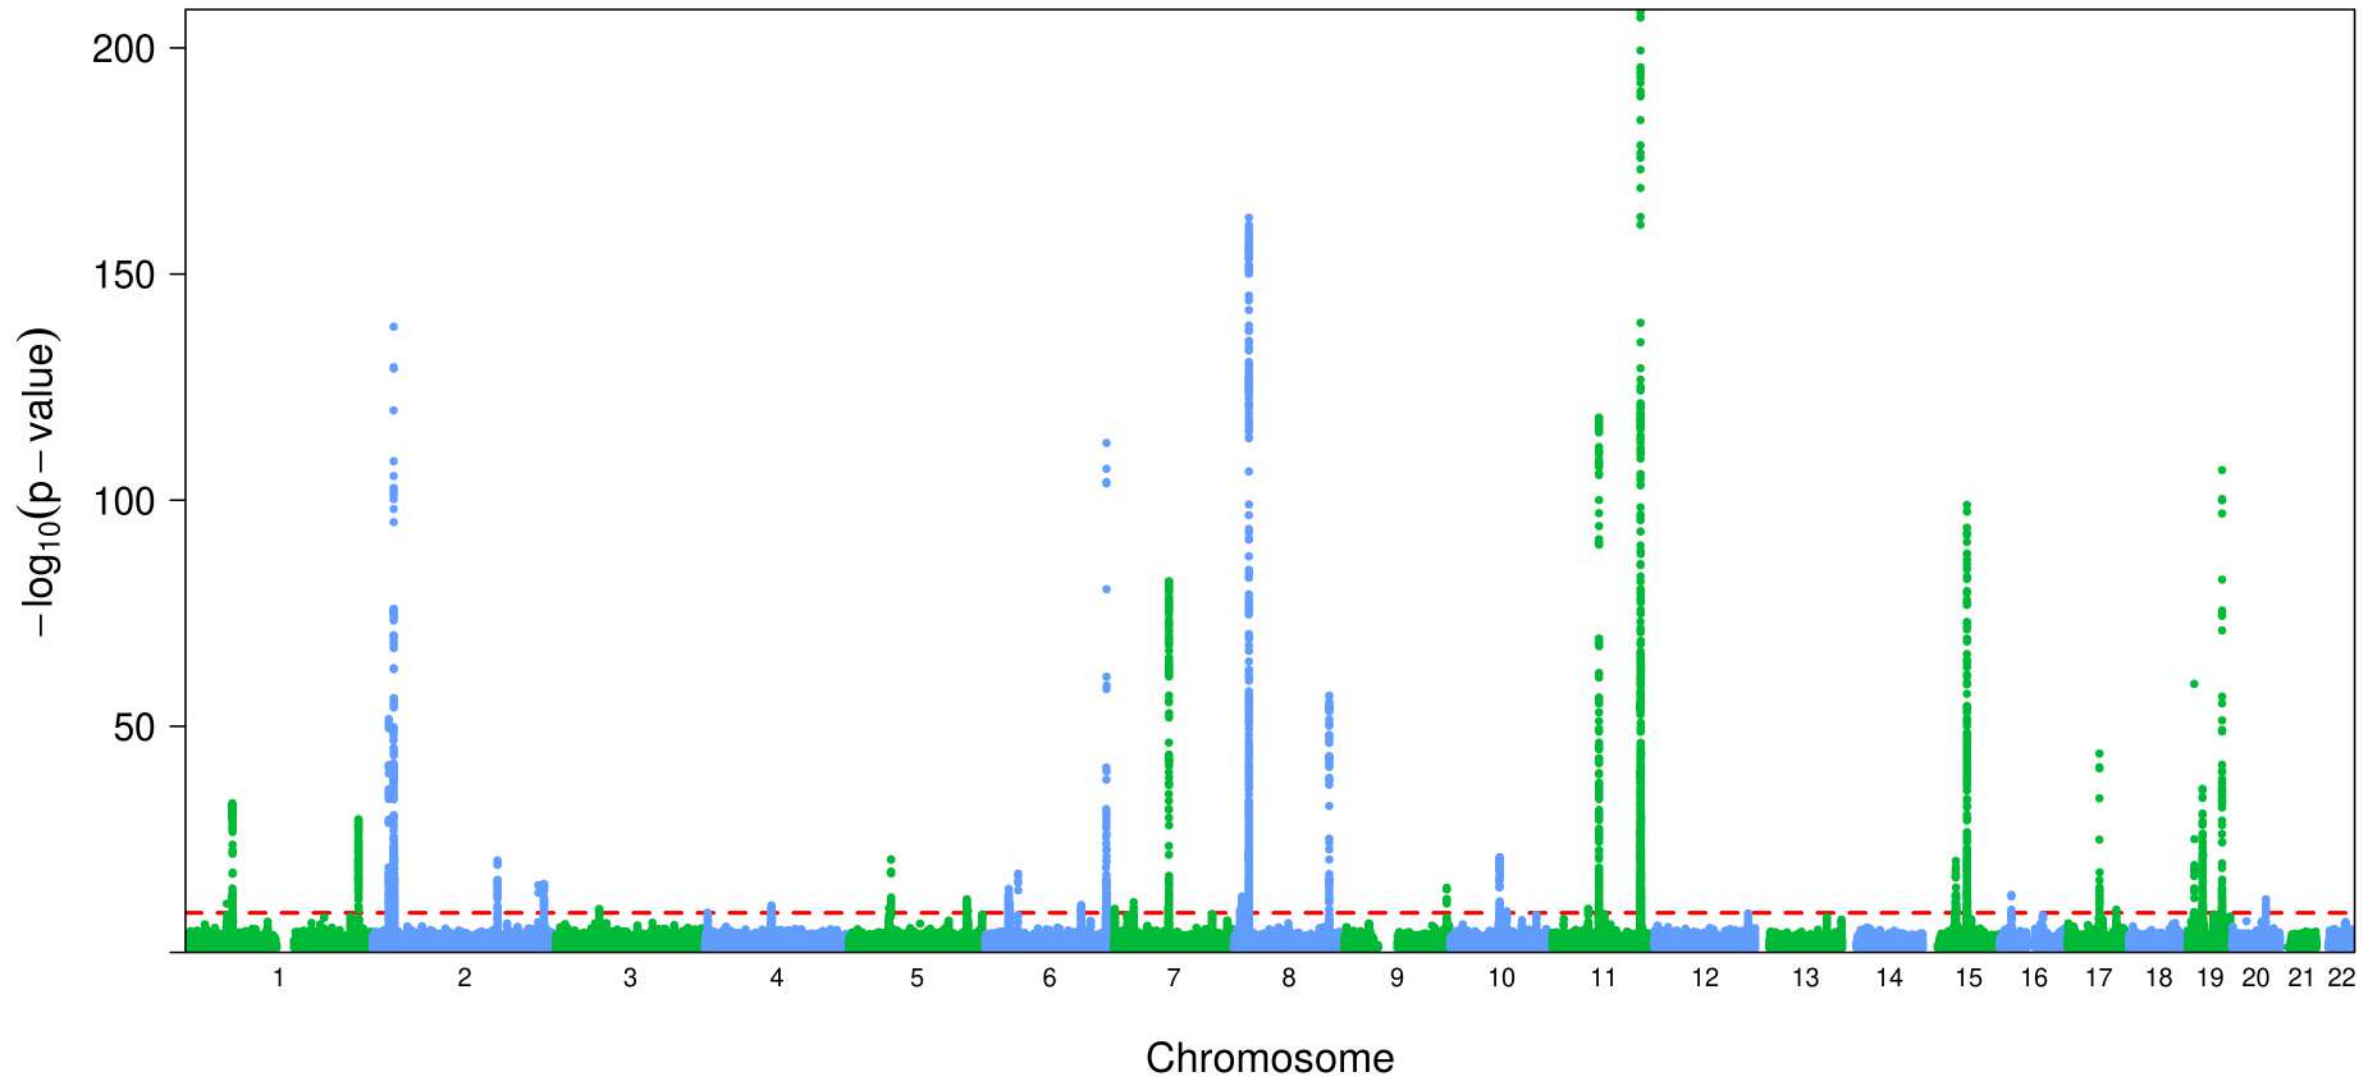



## VLDL-TG

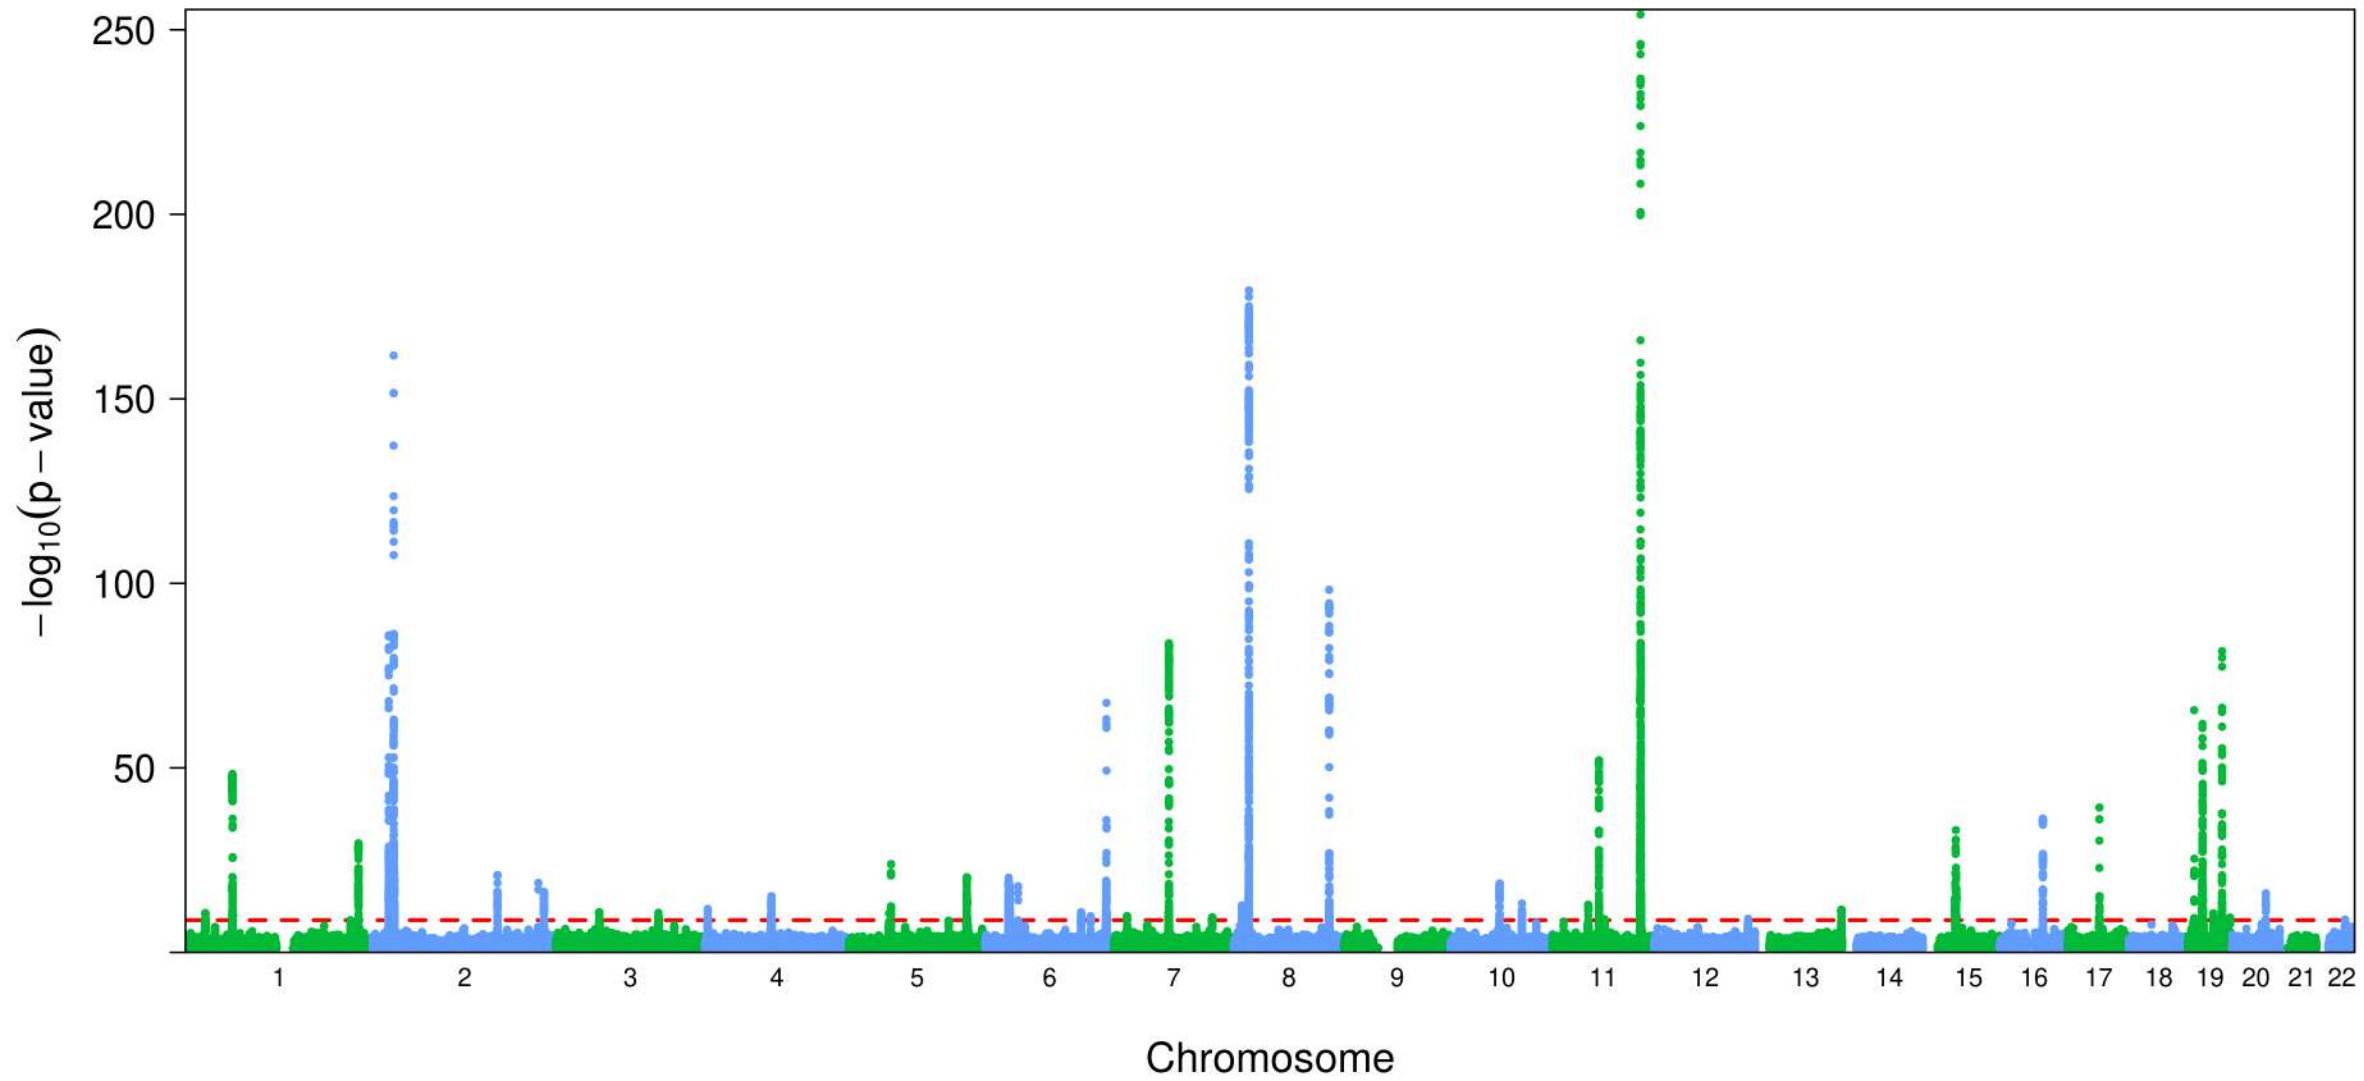

# XL-HDL-C

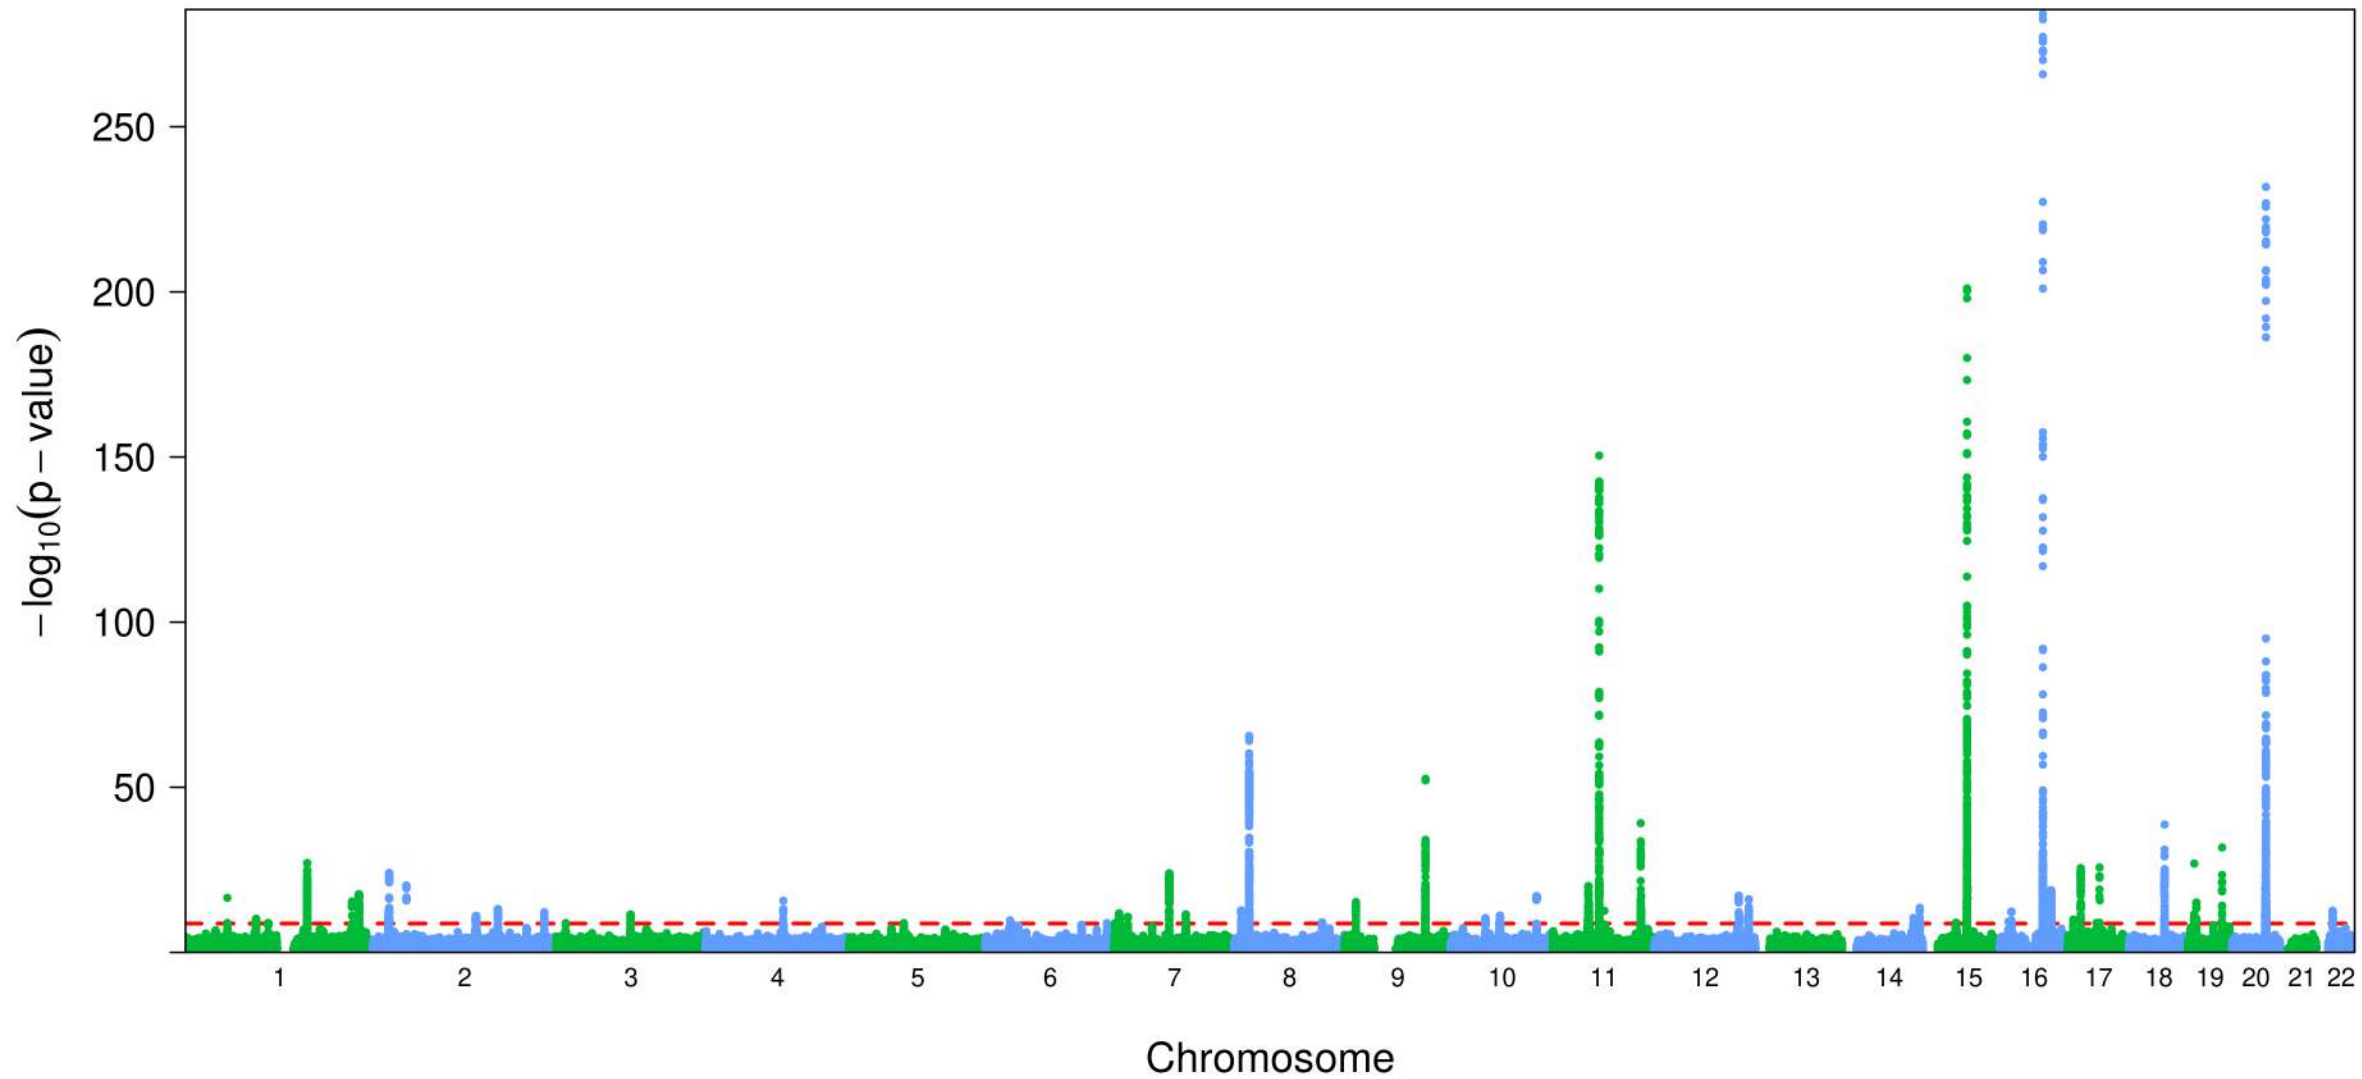

# XL-HDL-C\_percent

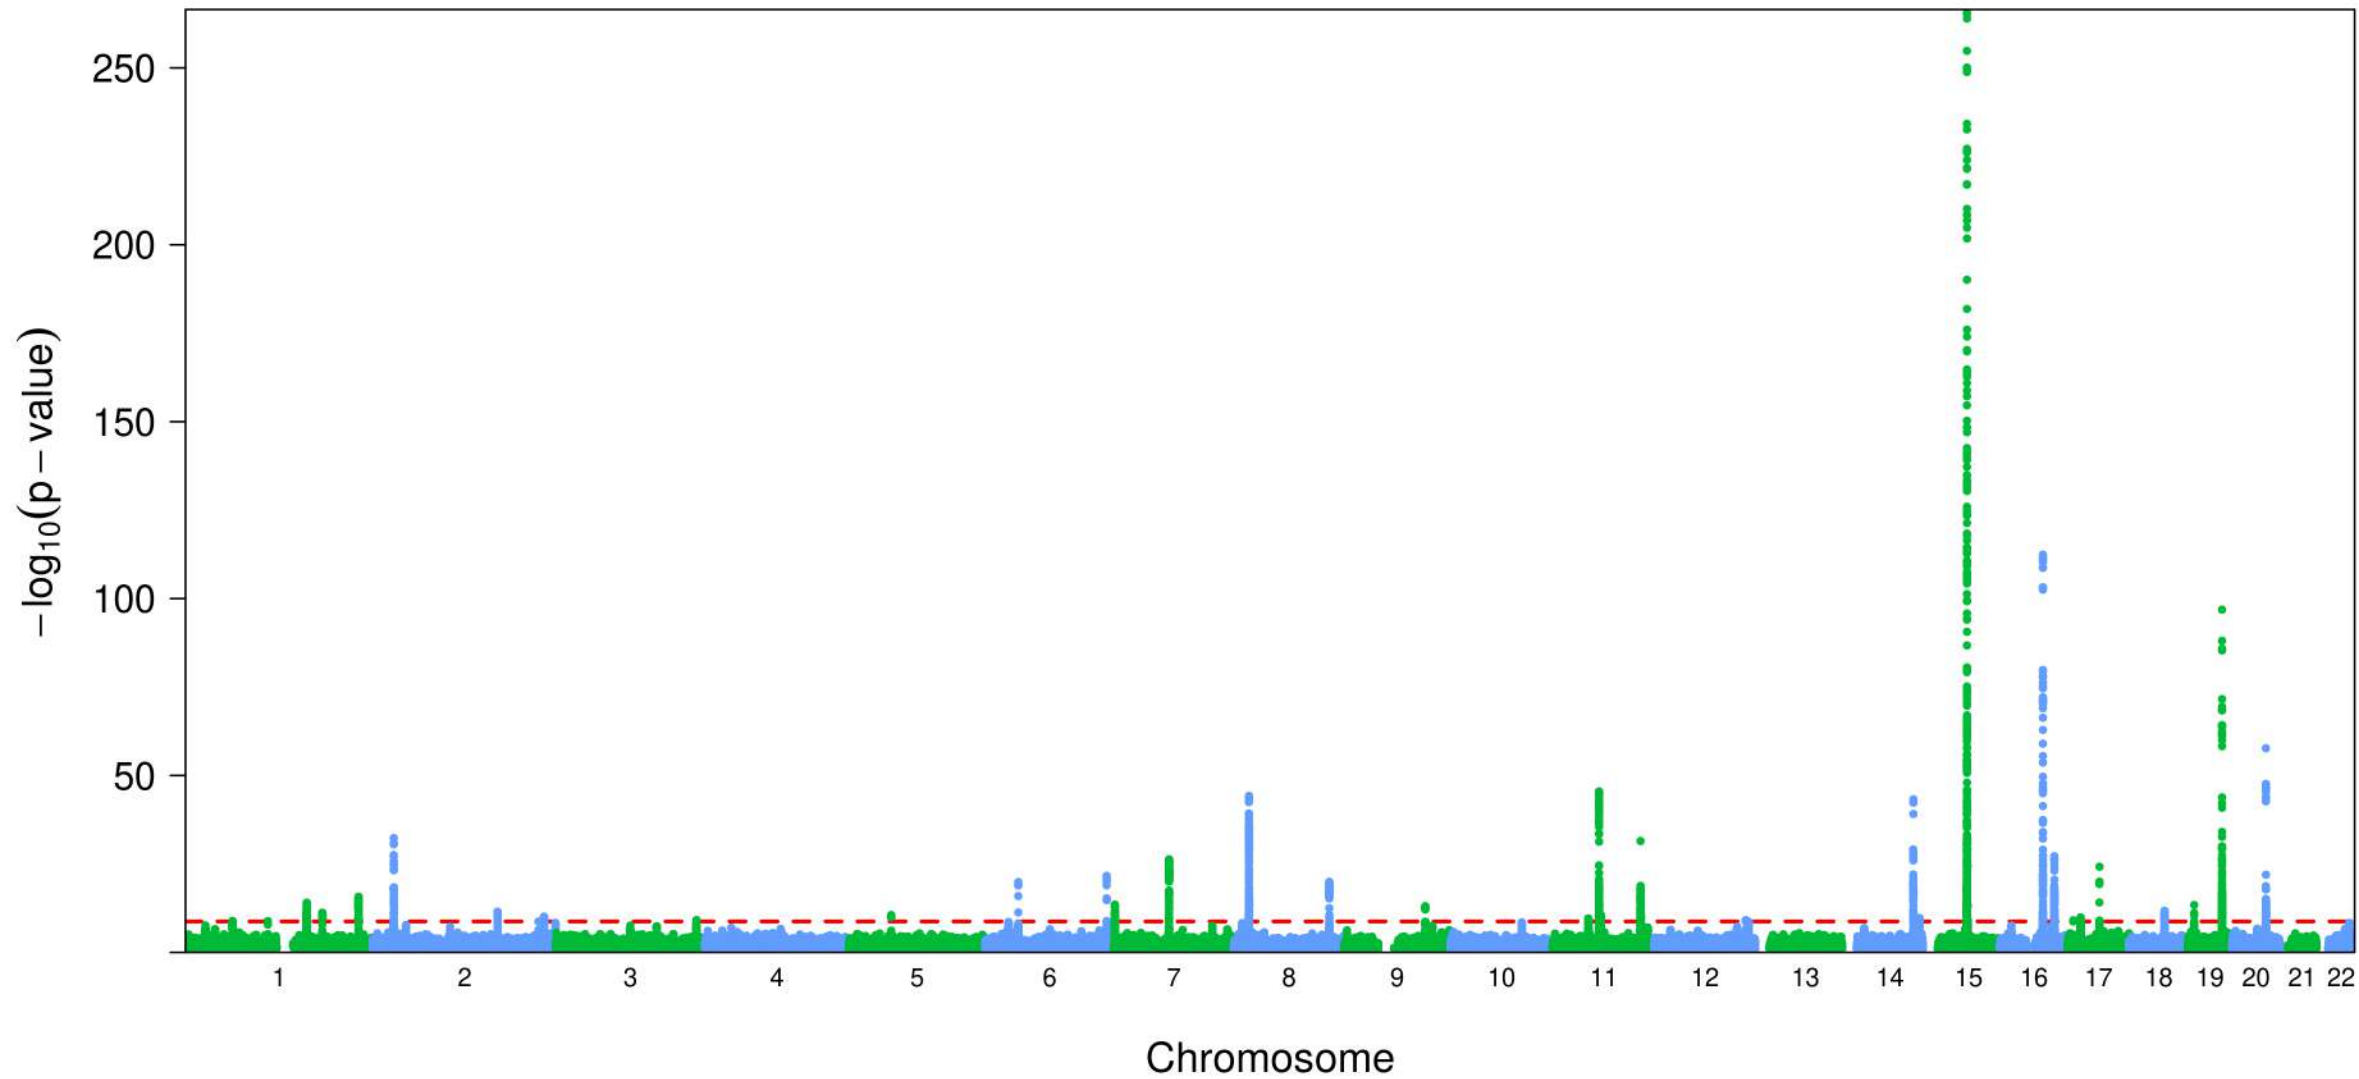

# XL-HDL-CE

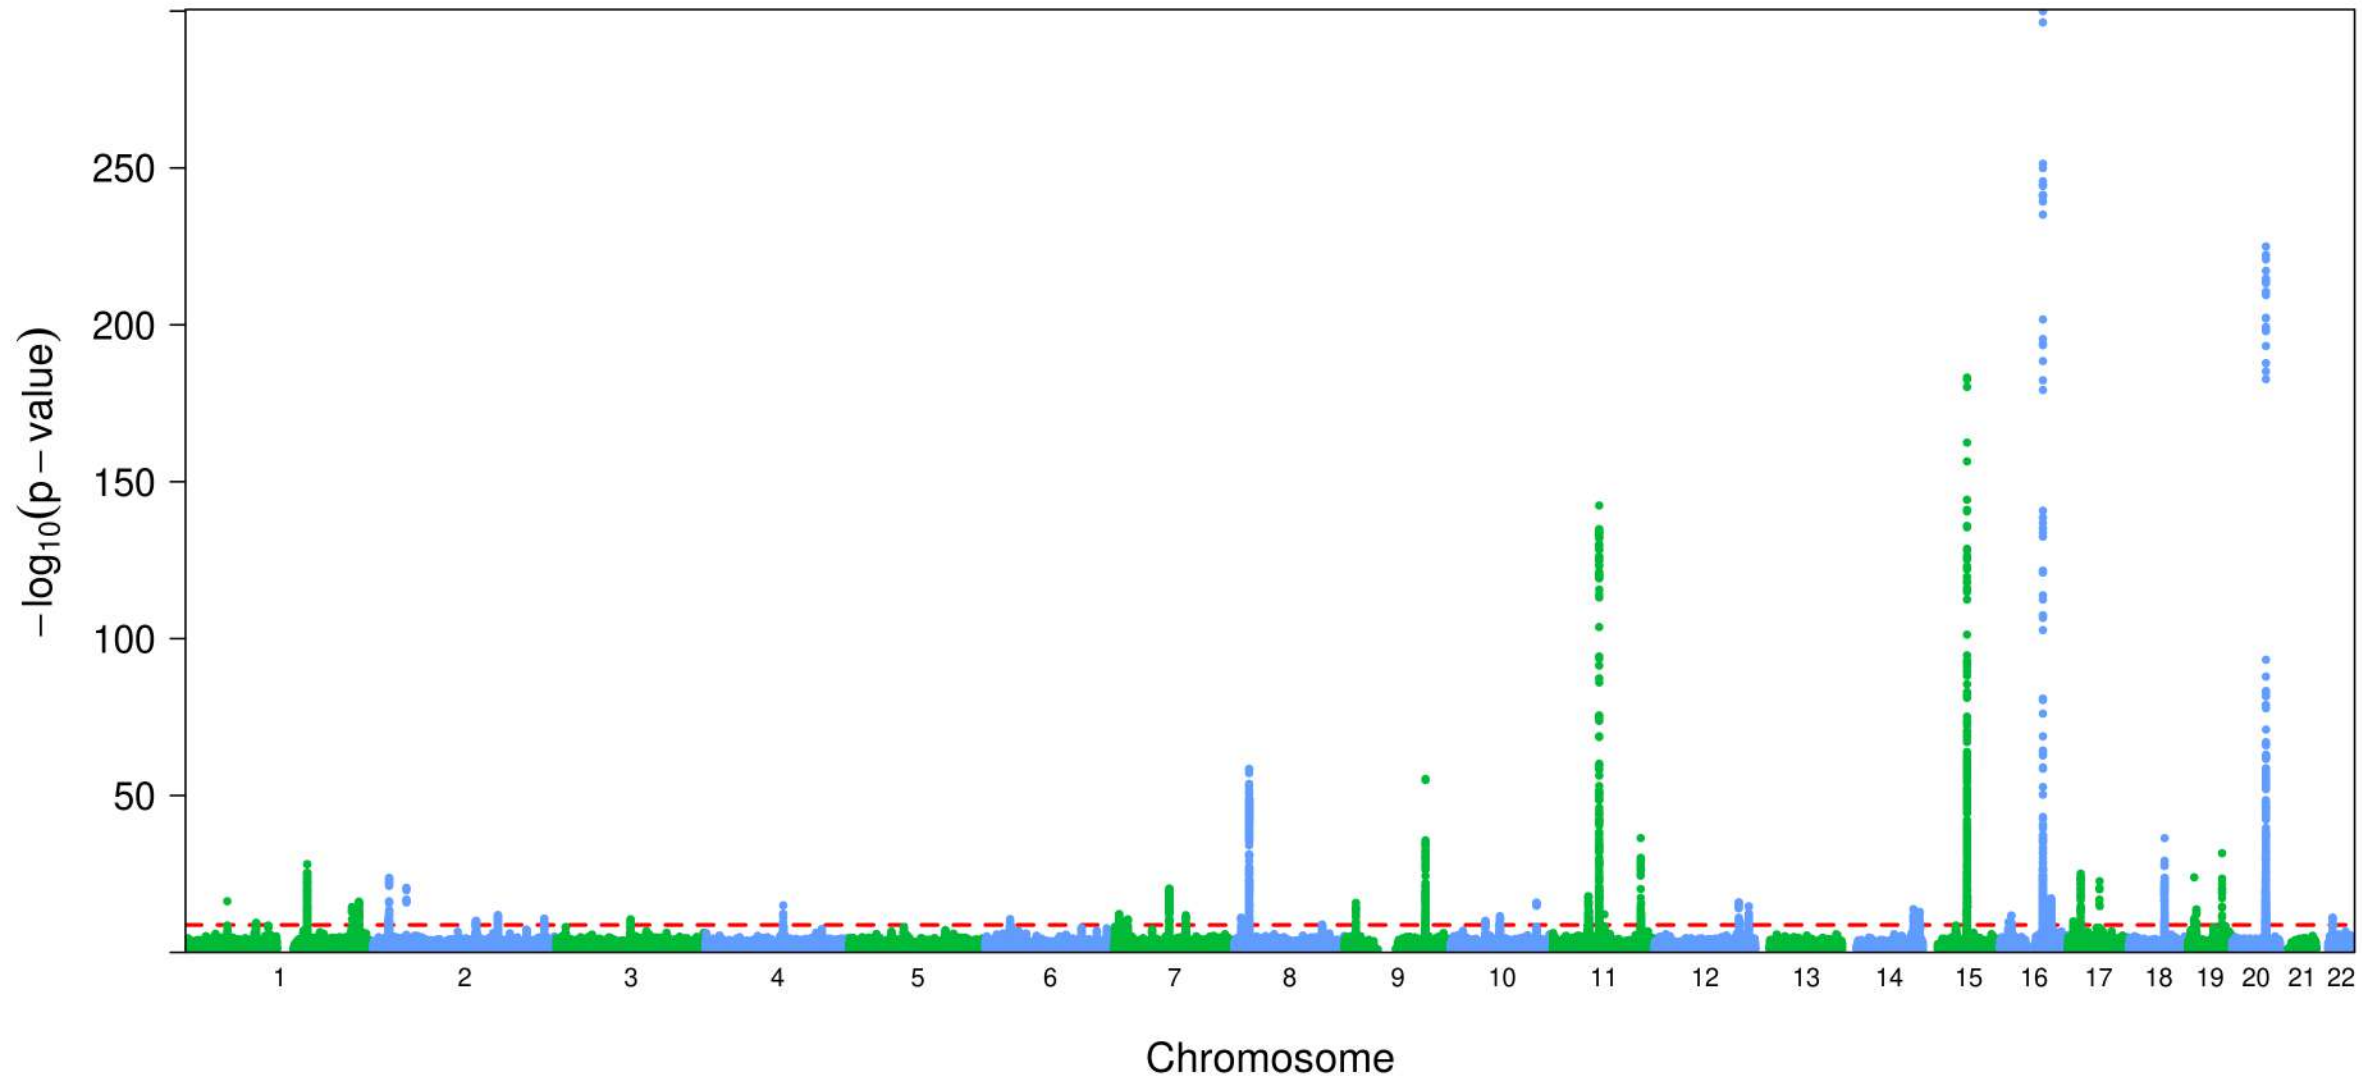

## XL-HDL-CE\_percent

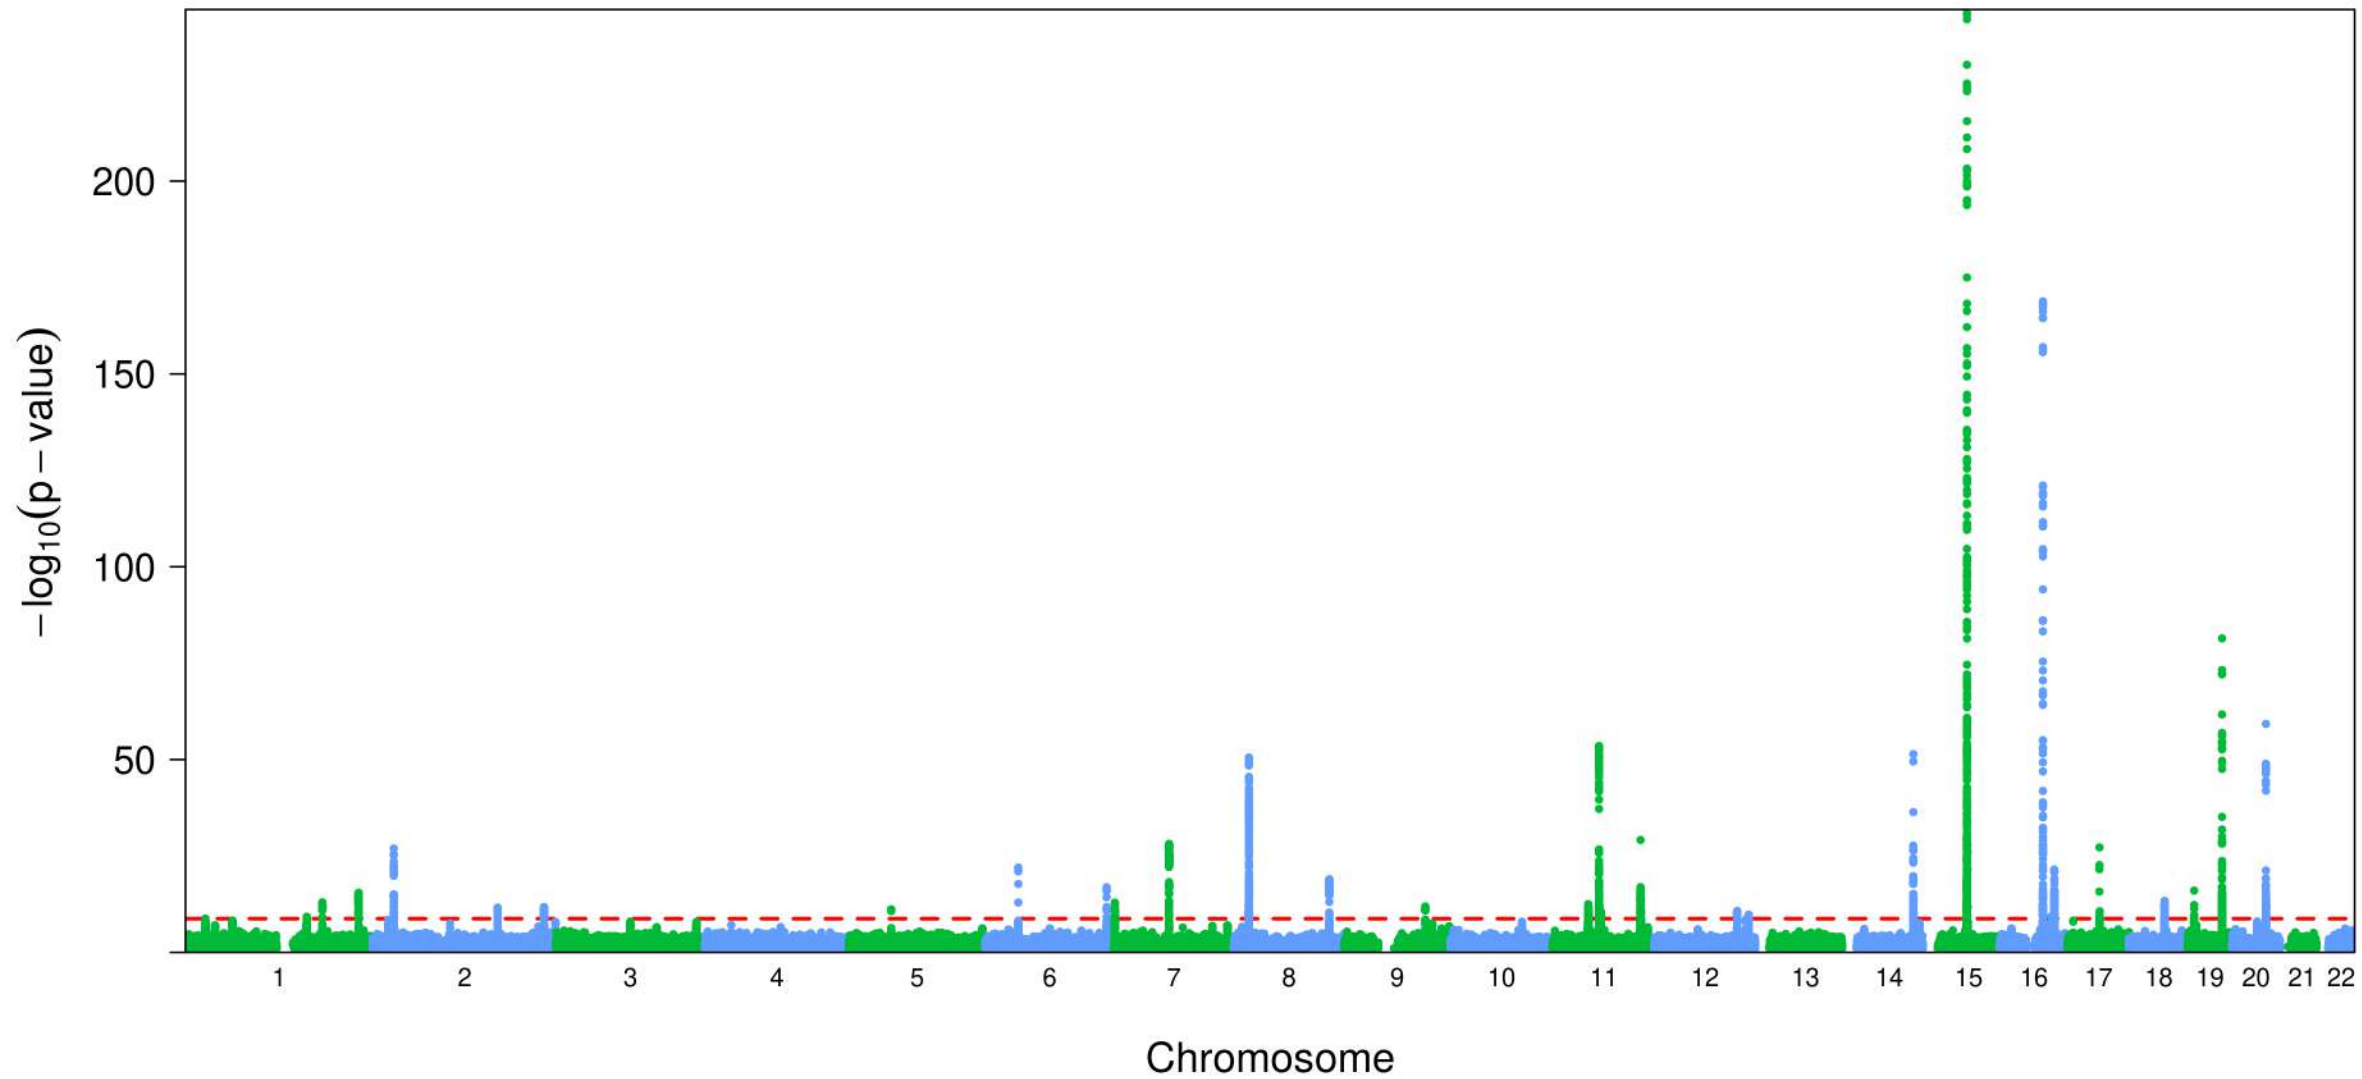

# XL-HDL-FC

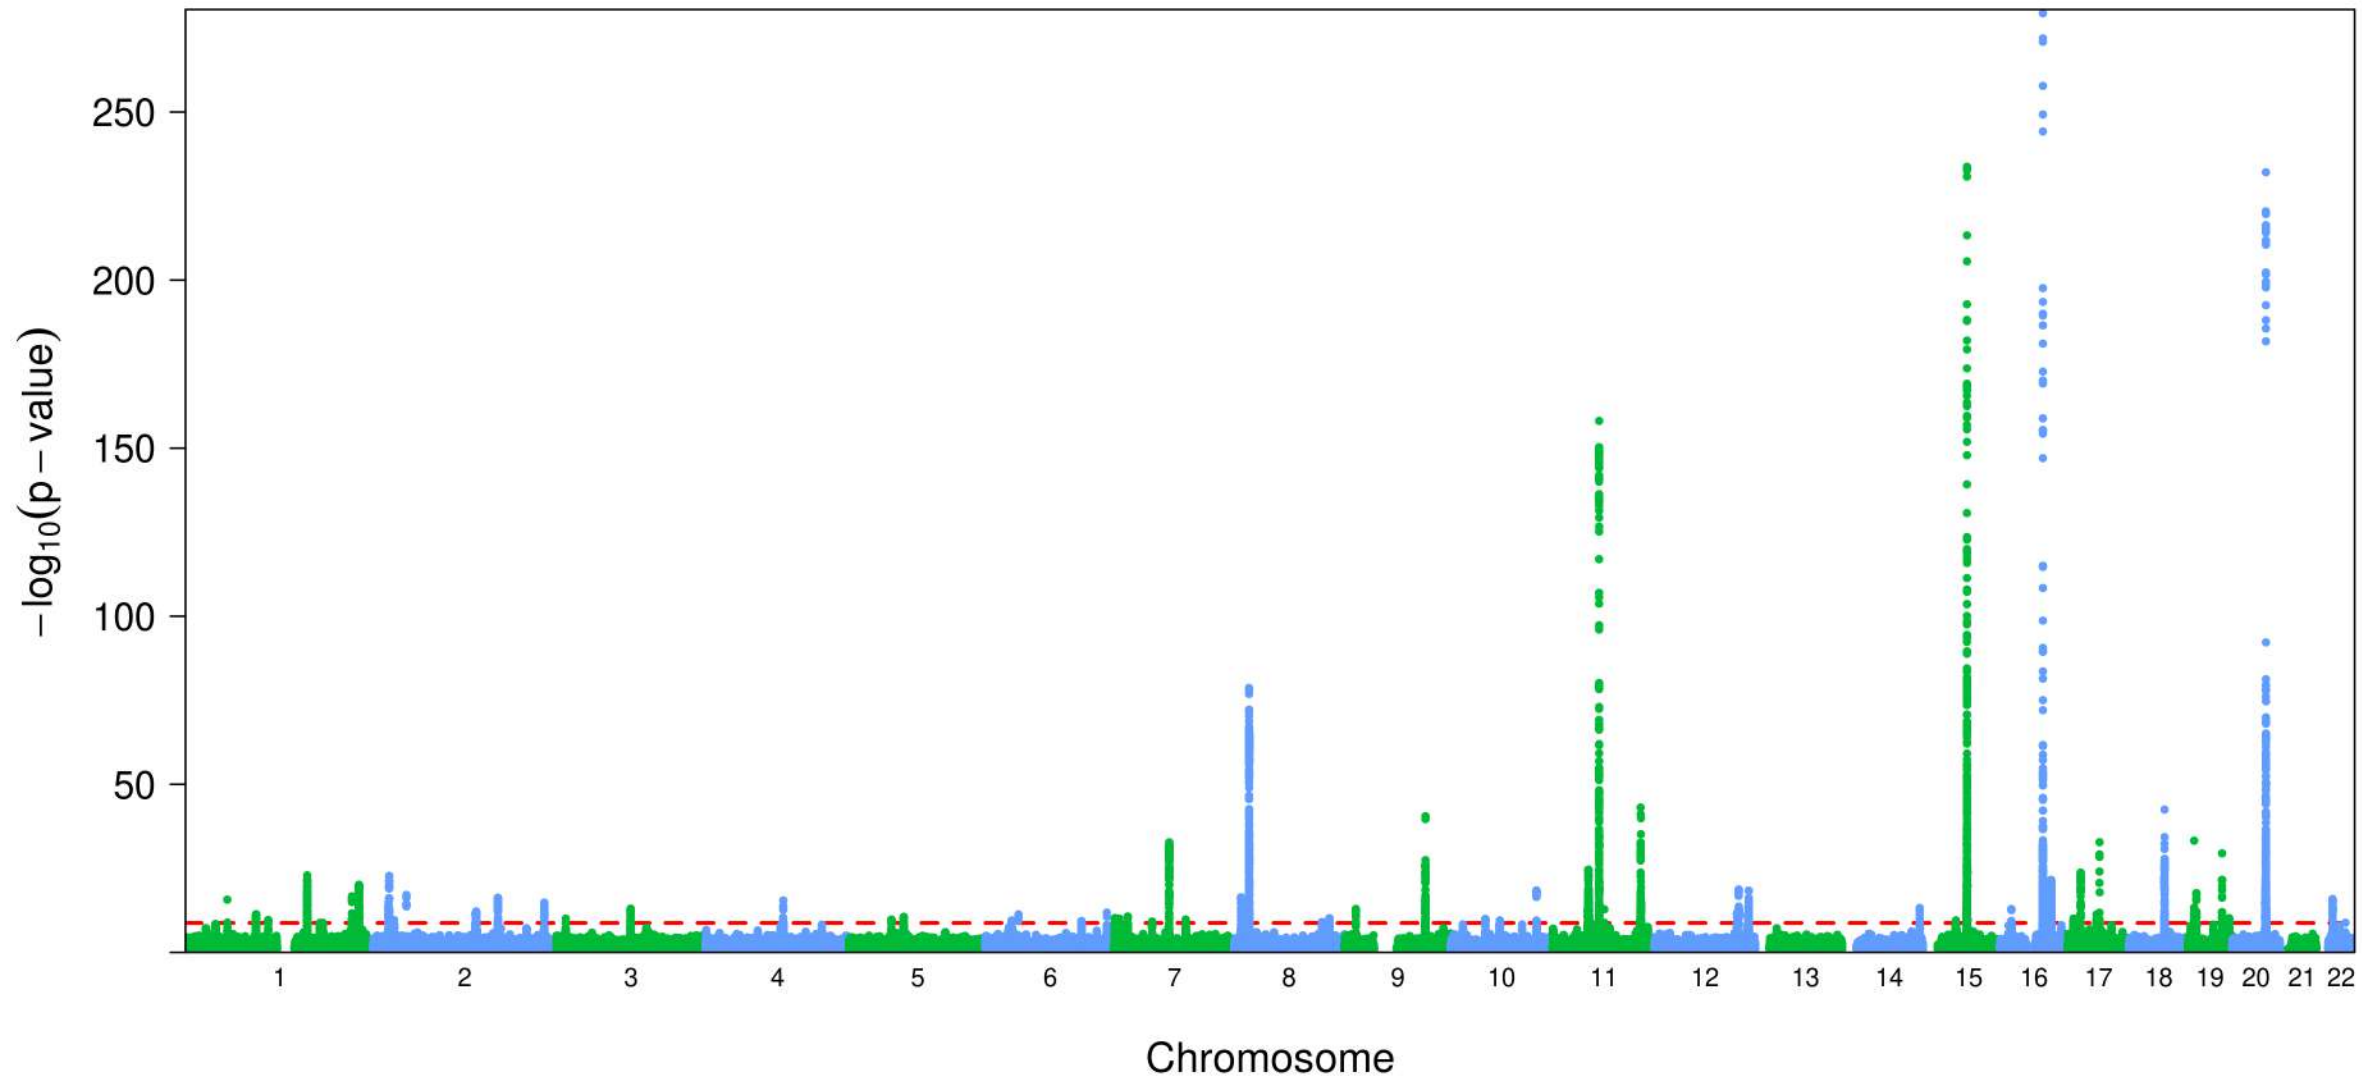

# XL-HDL-FC\_percent

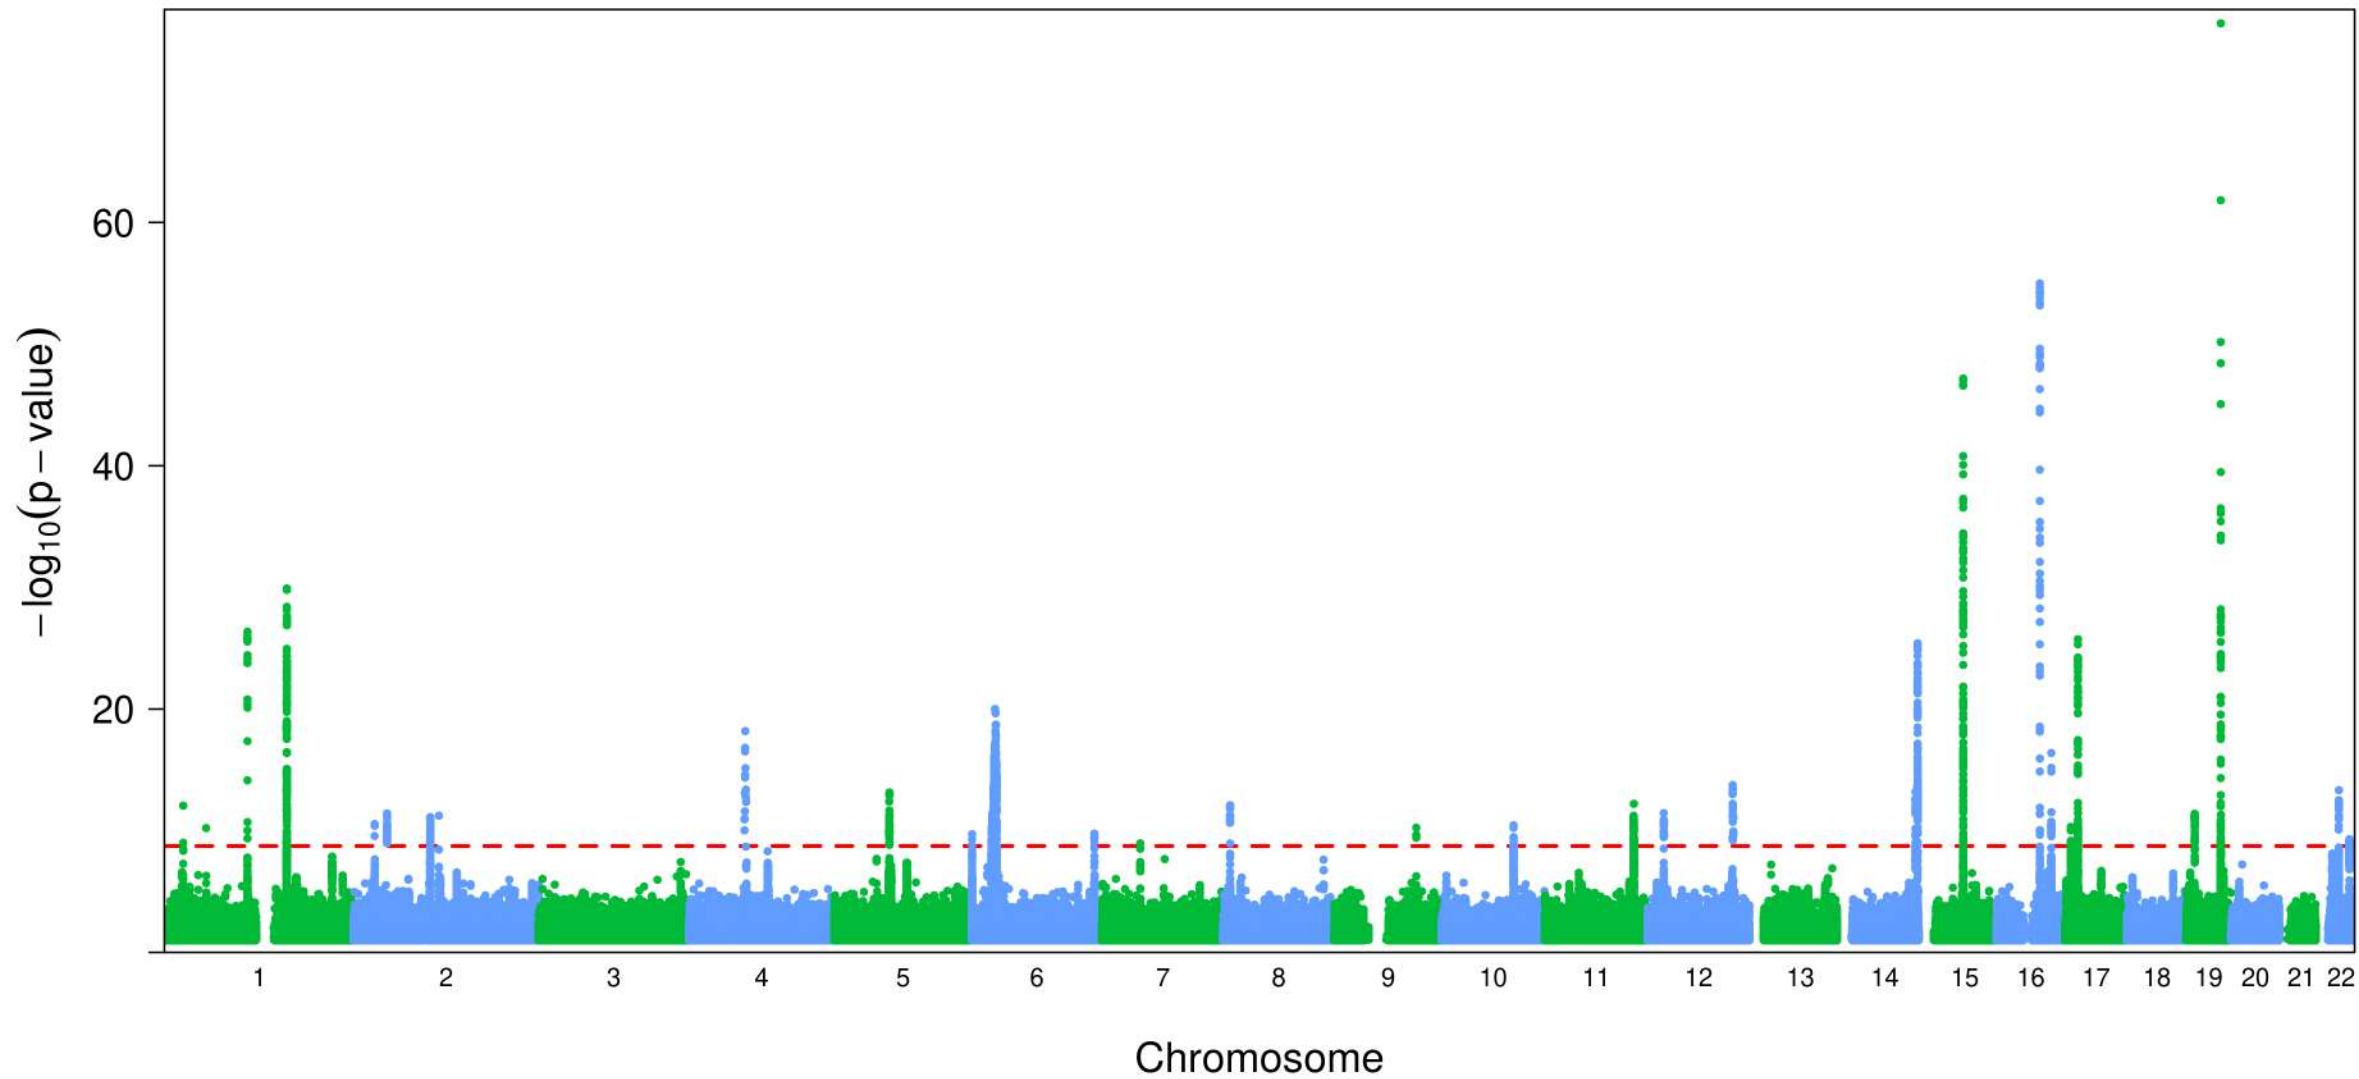

# XL-HDL-L

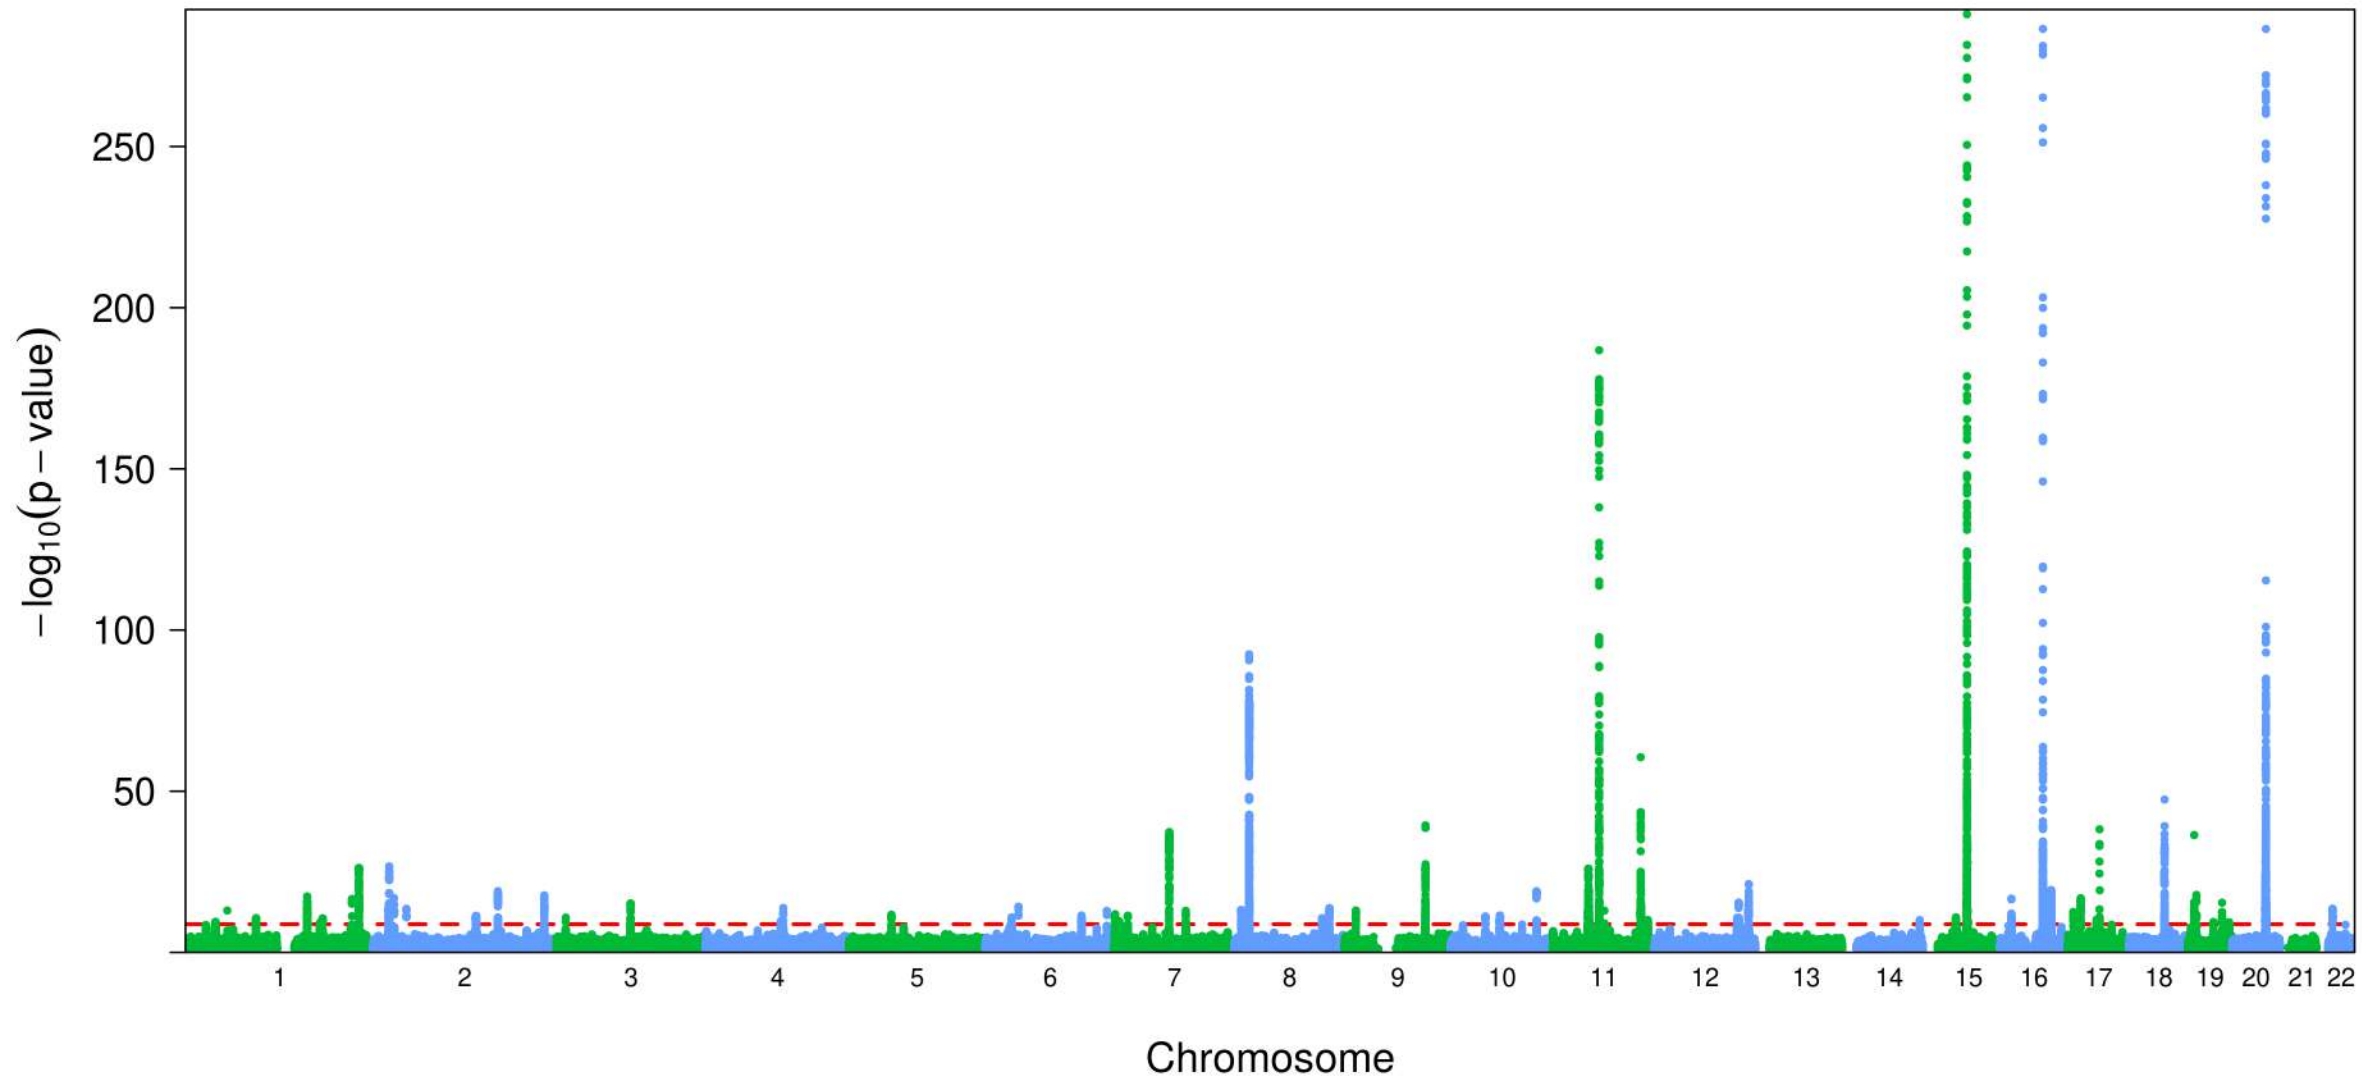



# XL-HDL-P

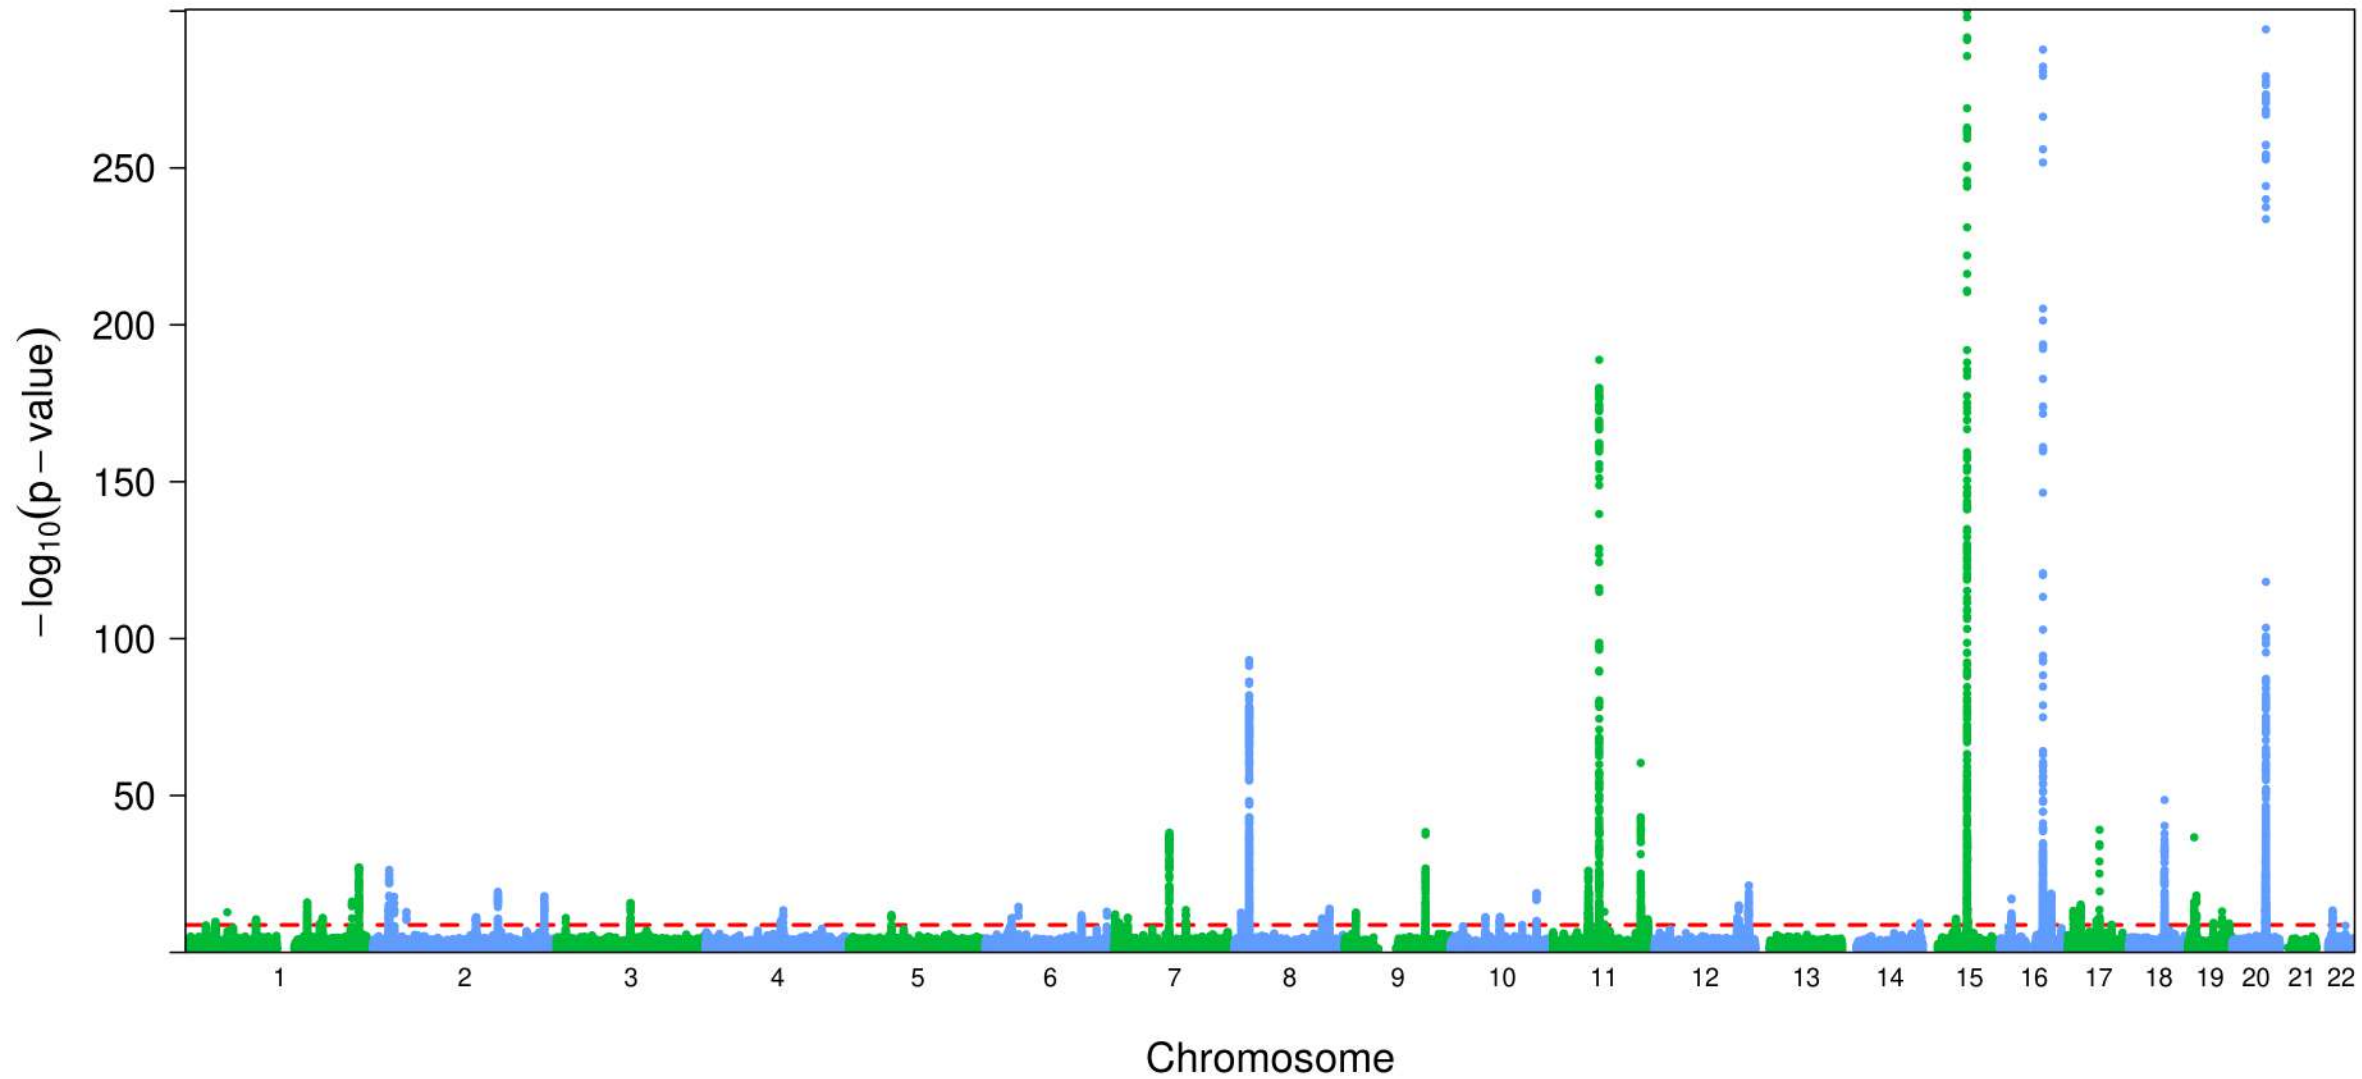

# XL-HDL-PL

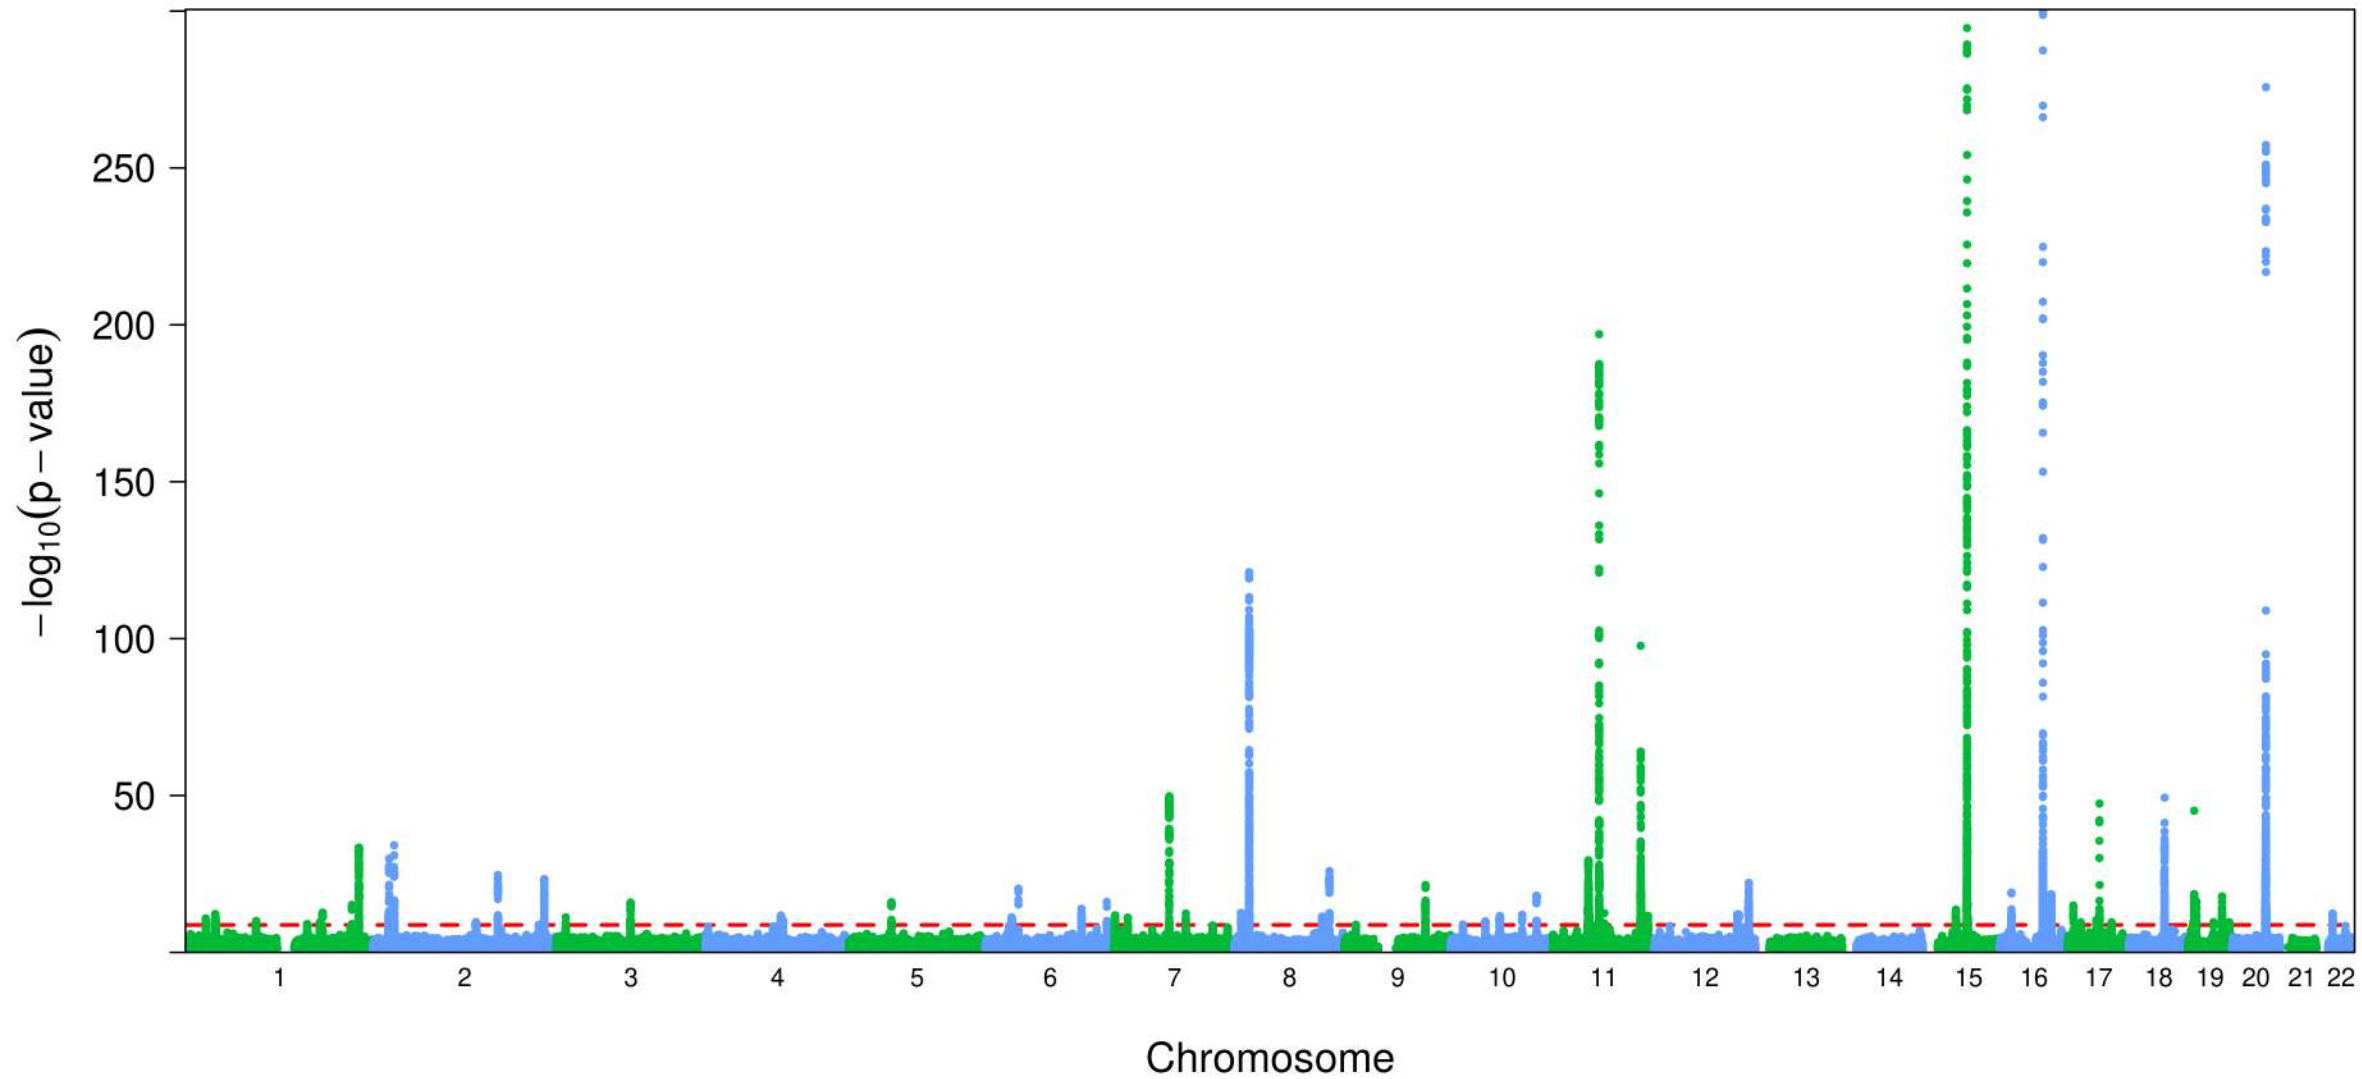

# XL-HDL-PL\_percent

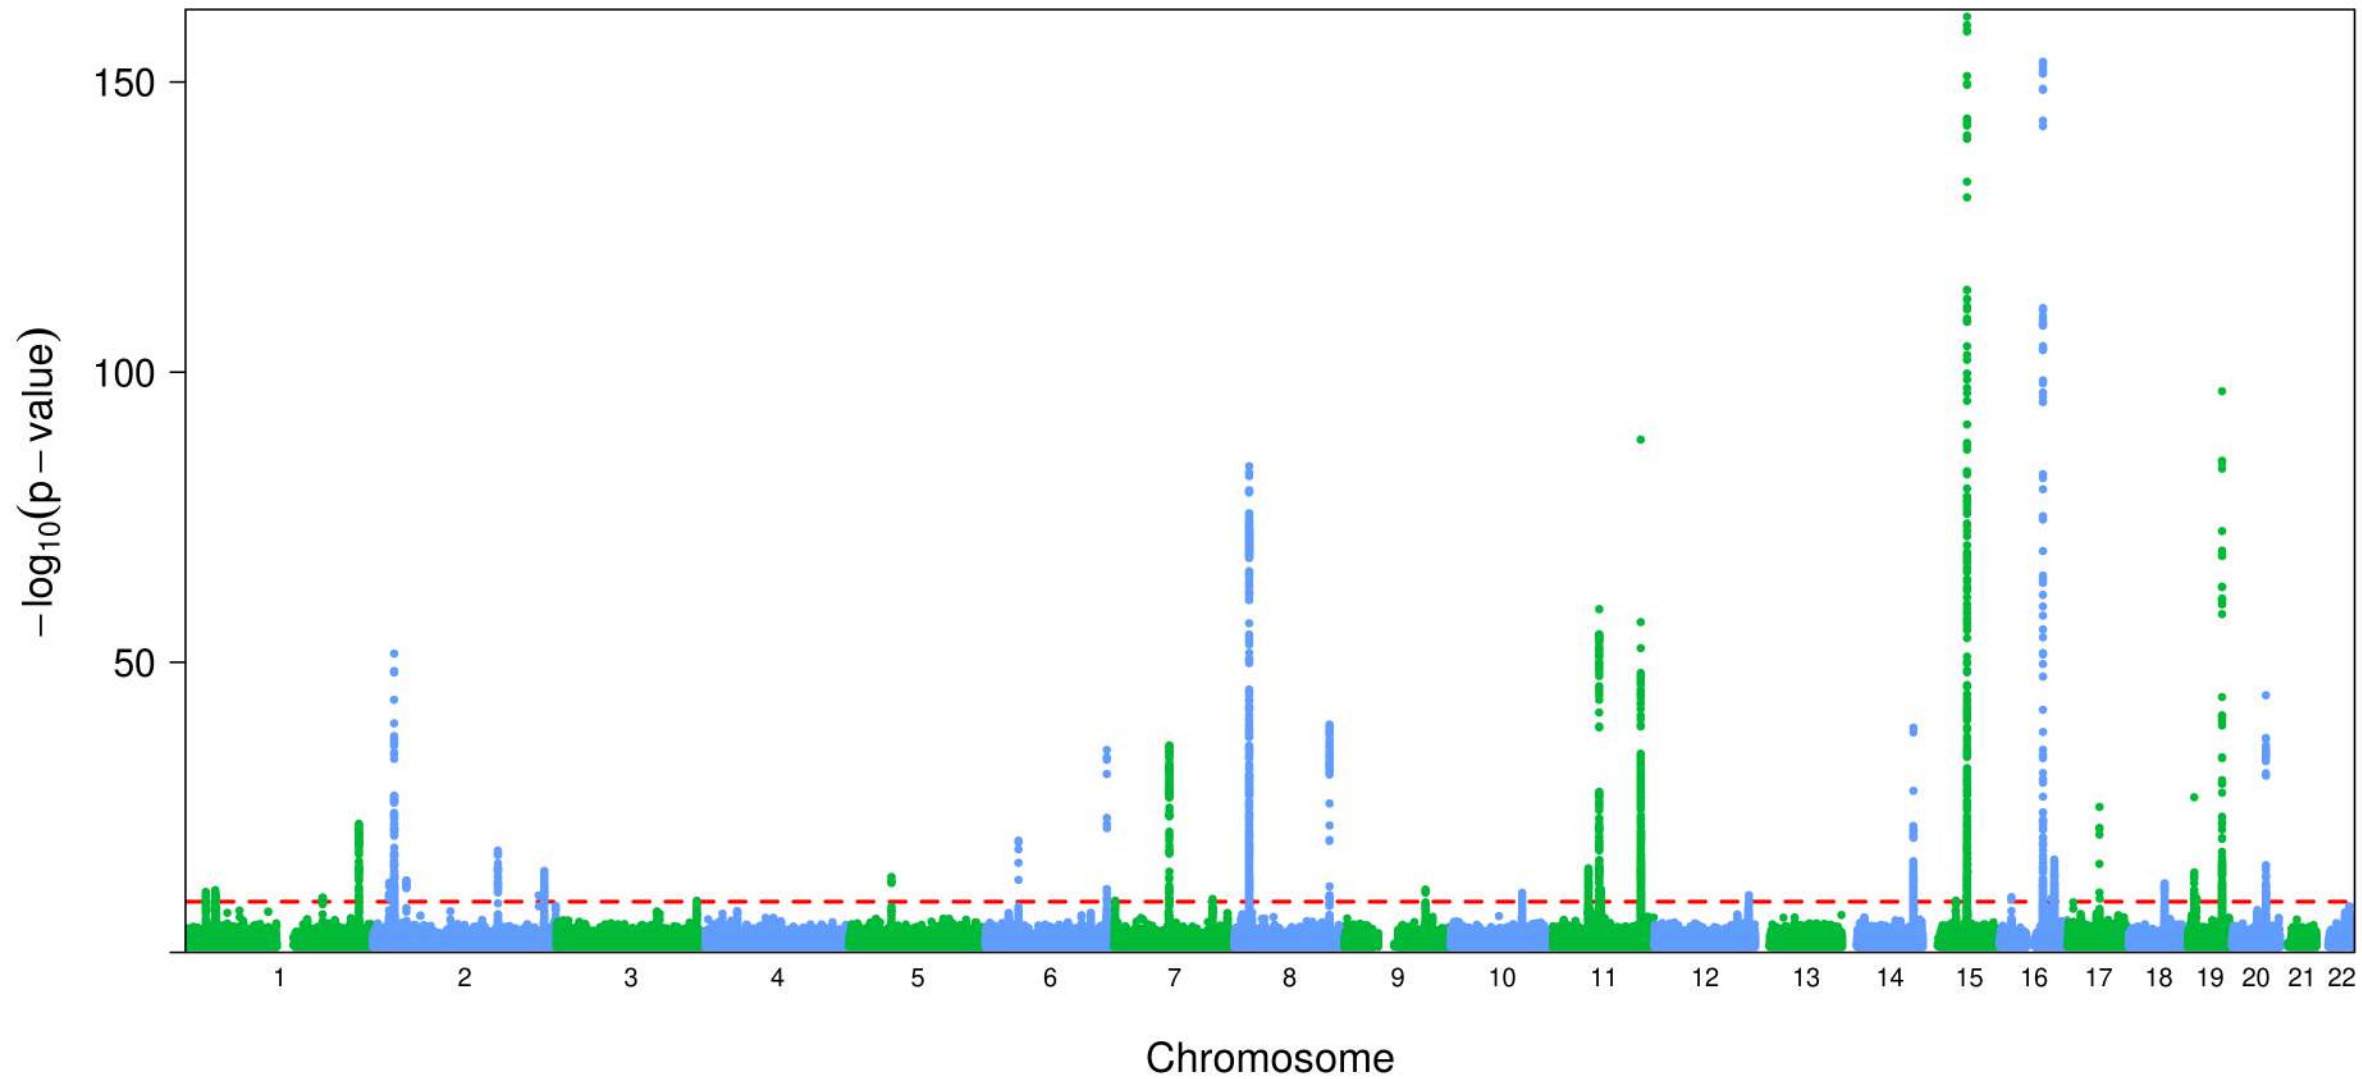

# XL-HDL-TG

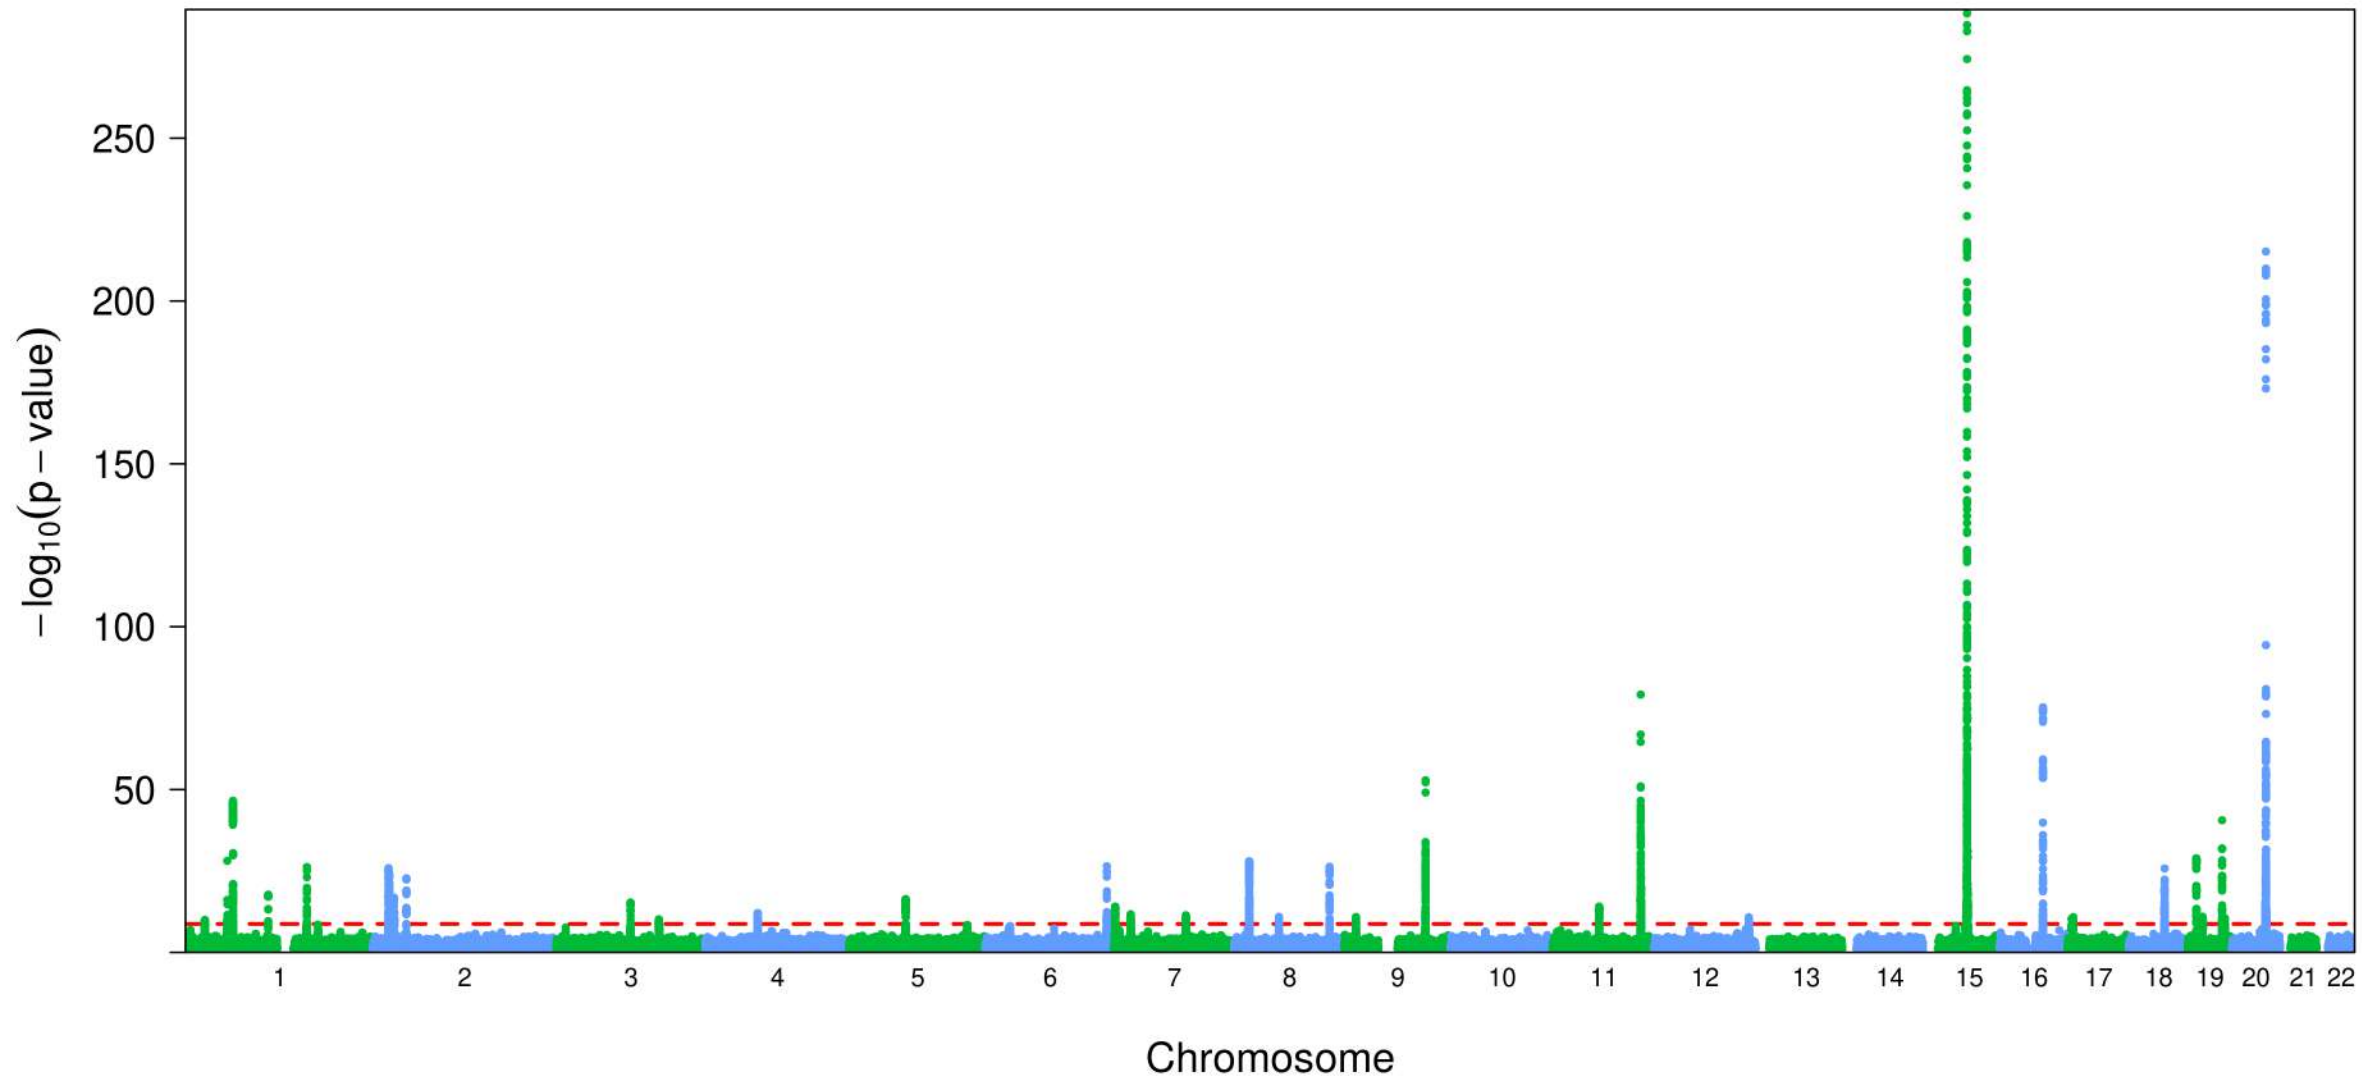

## XL-HDL-TG\_percent

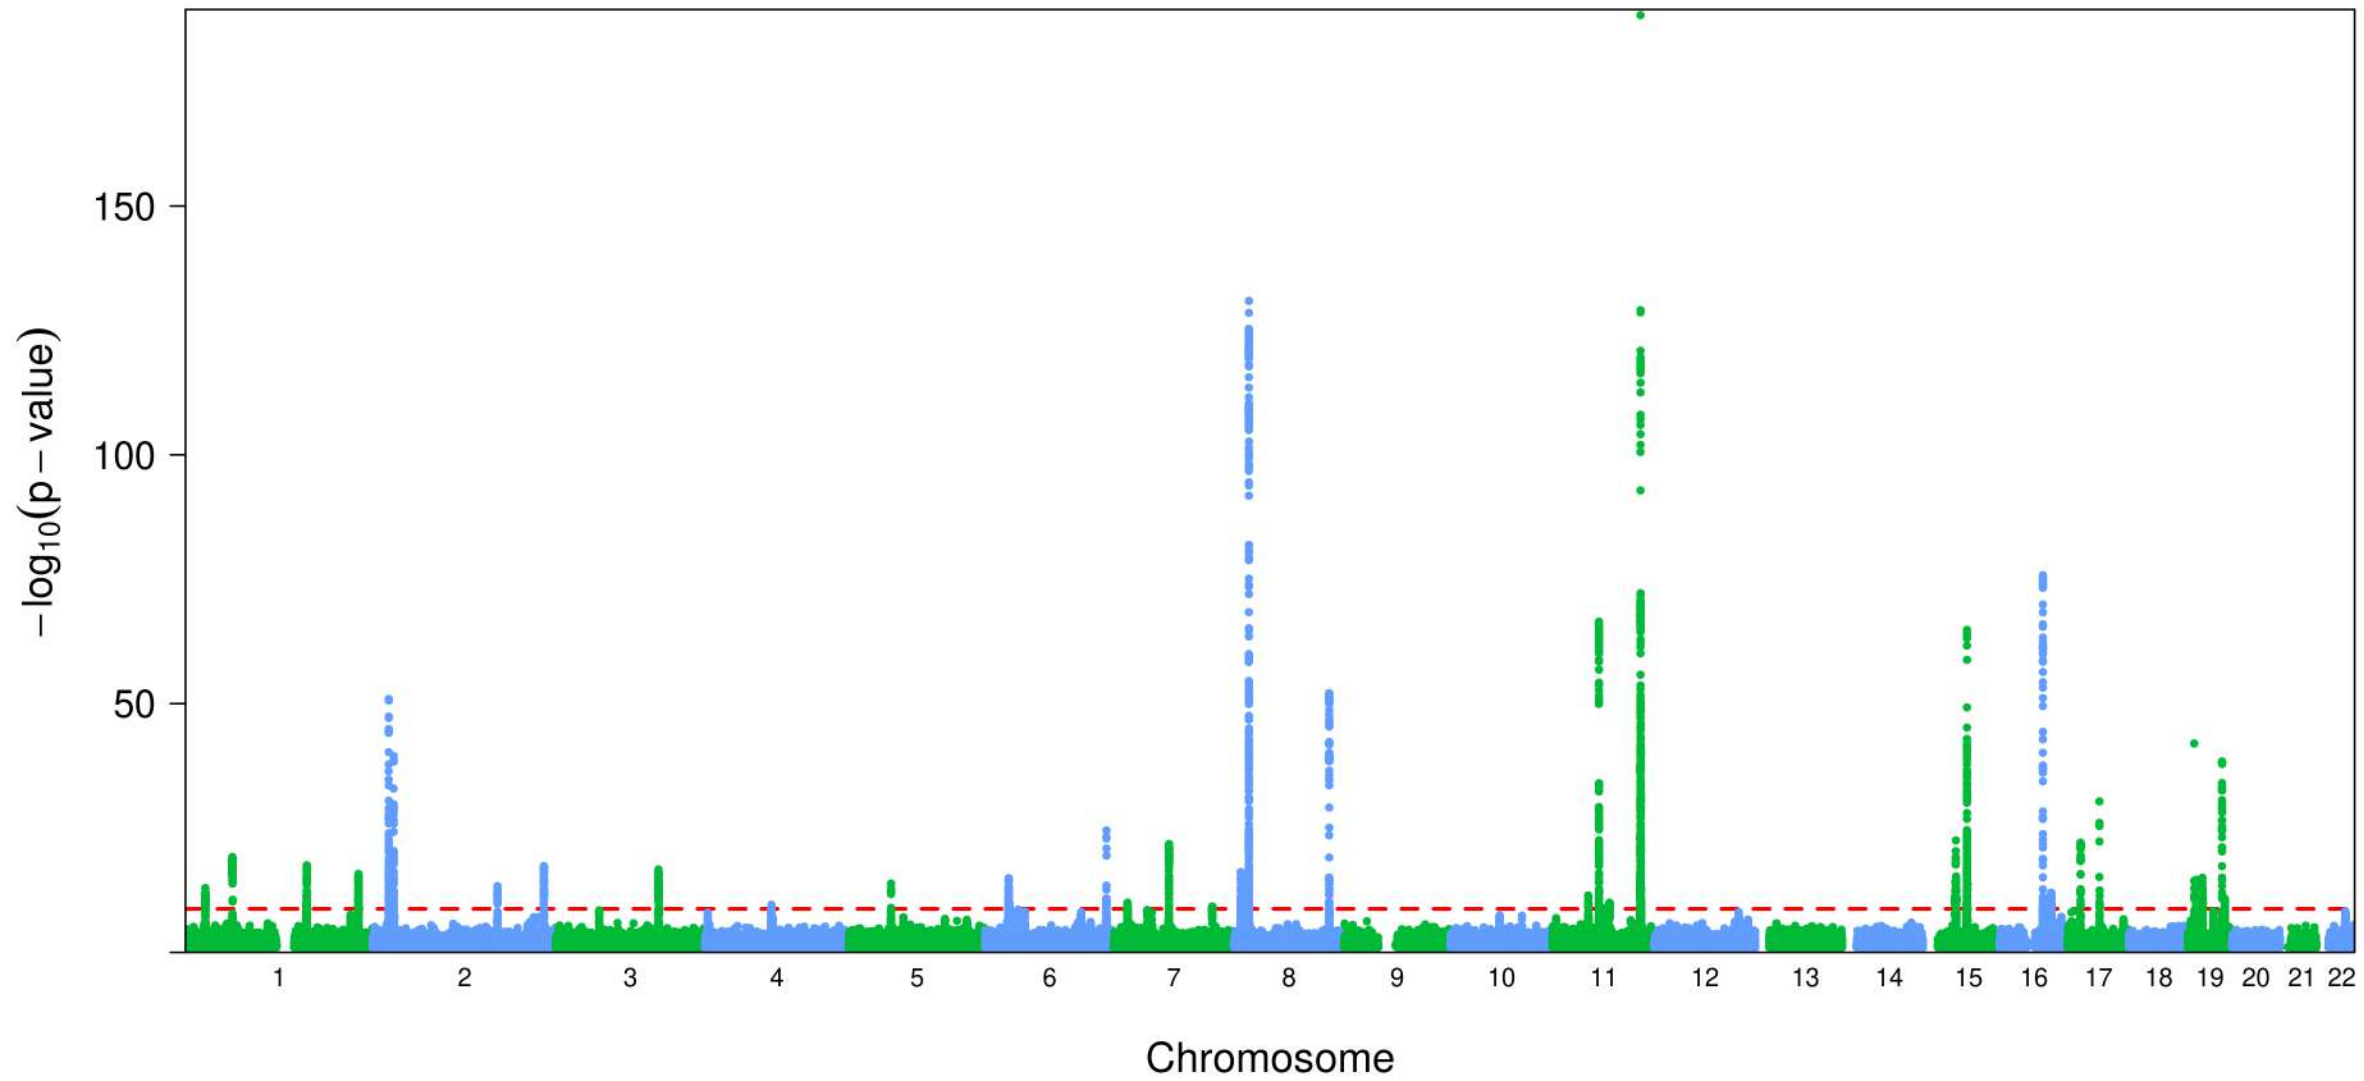

# XL-VLDL-C

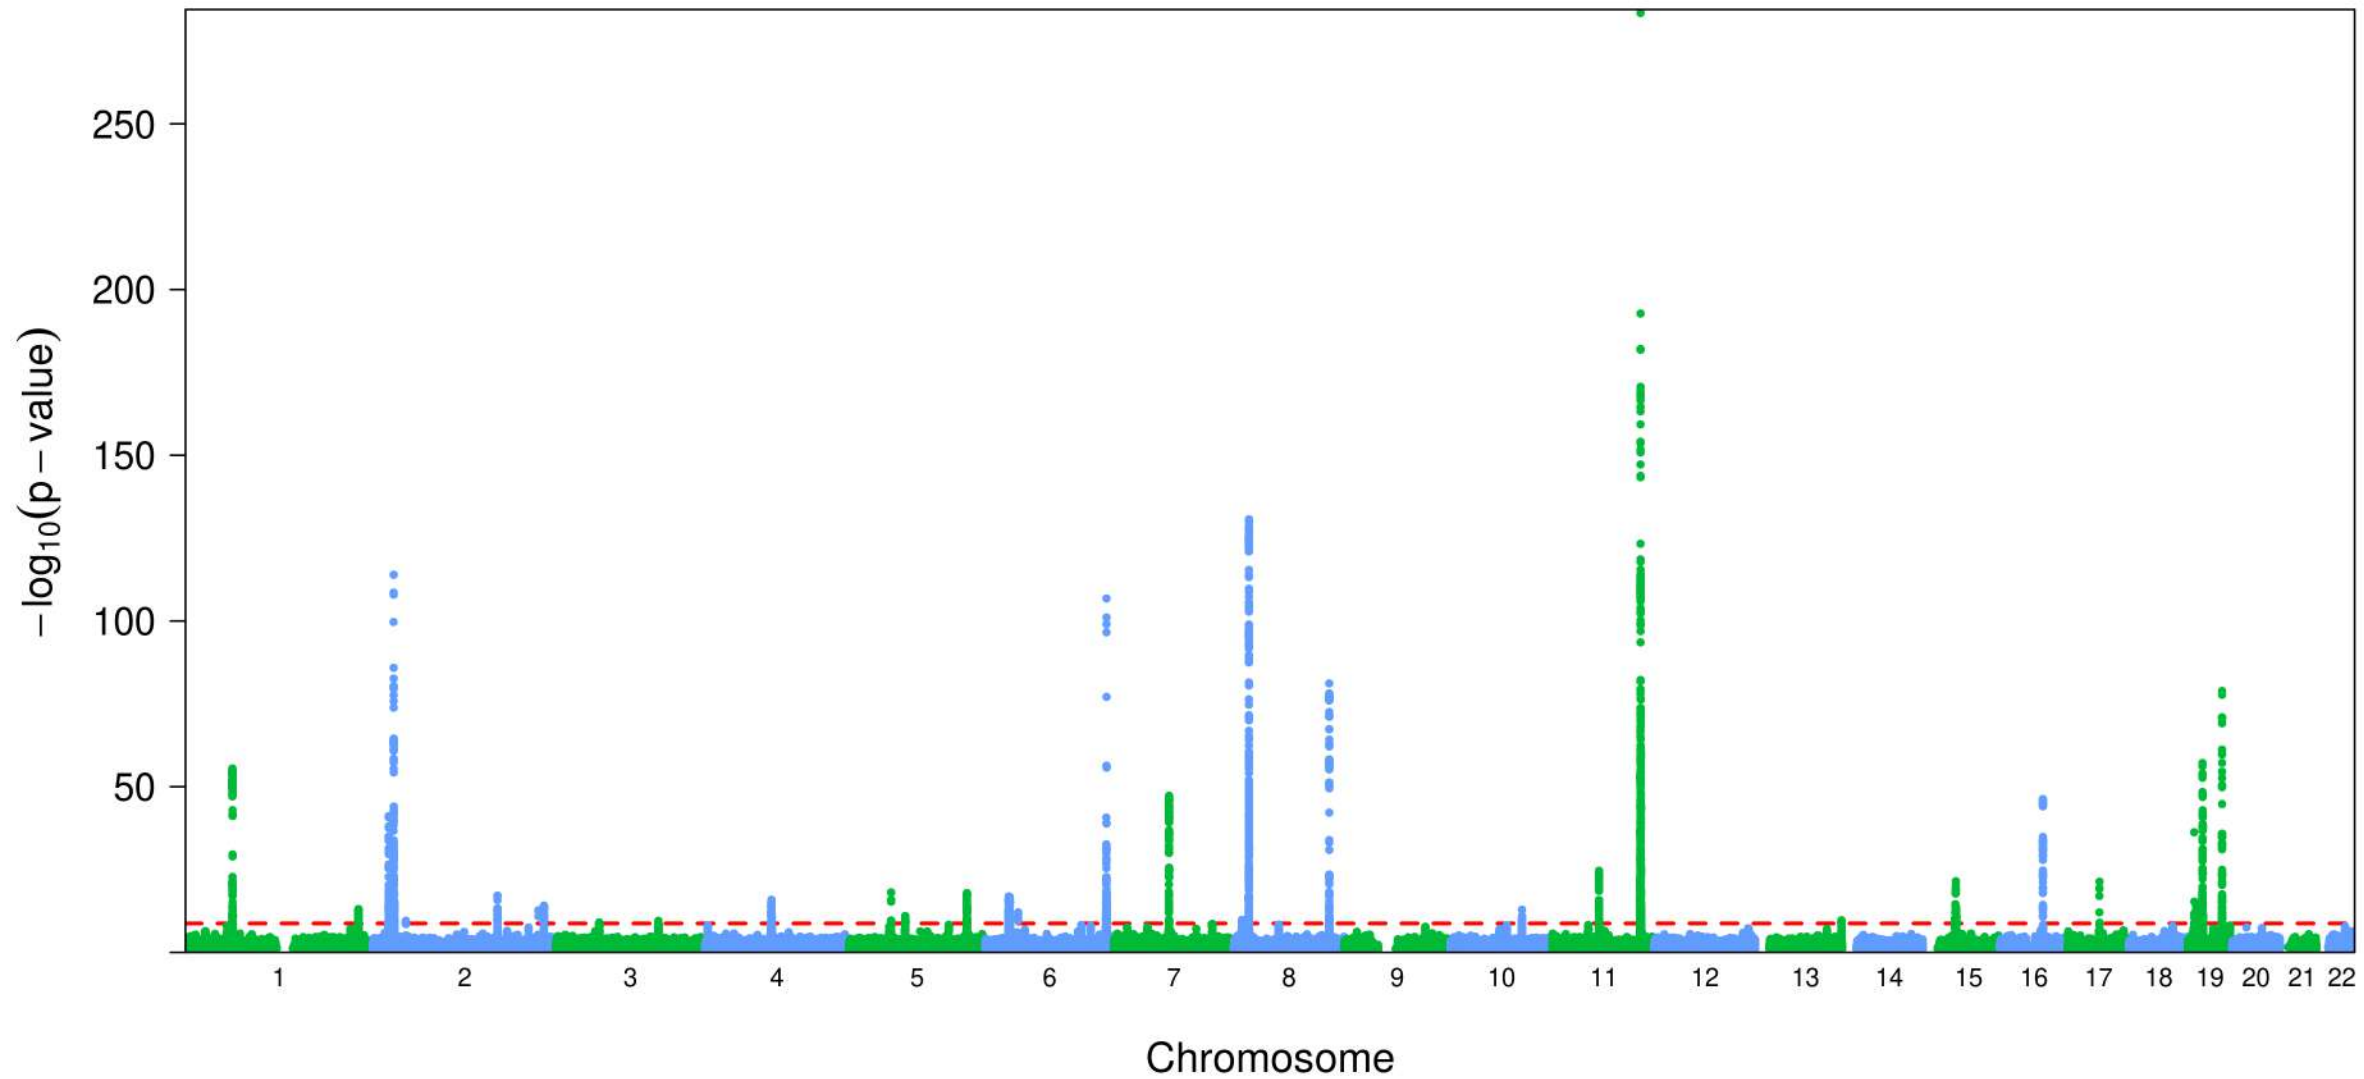

# XL-VLDL-C\_percent

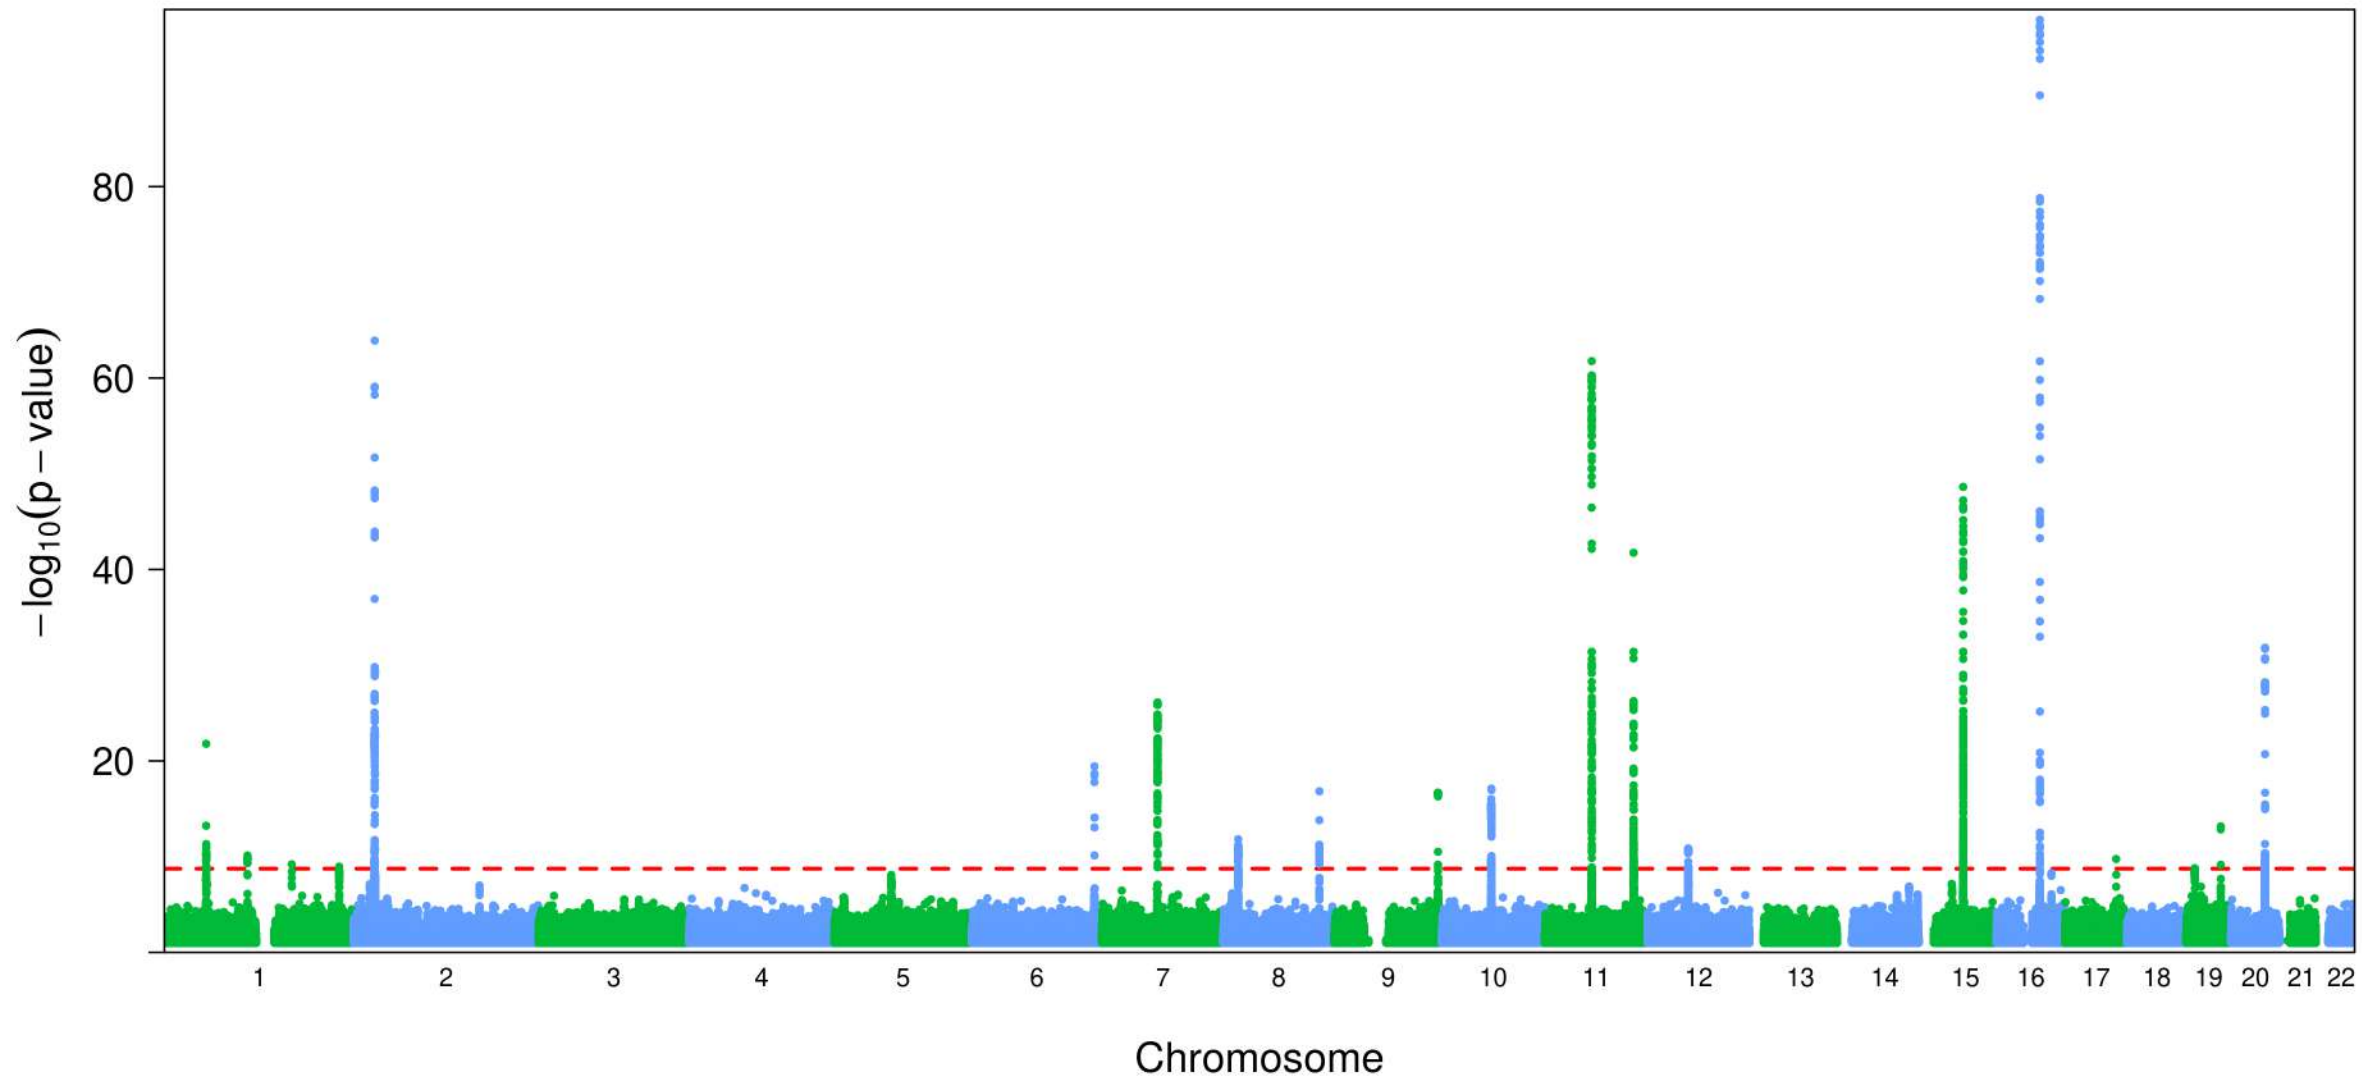

# XL-VLDL-CE

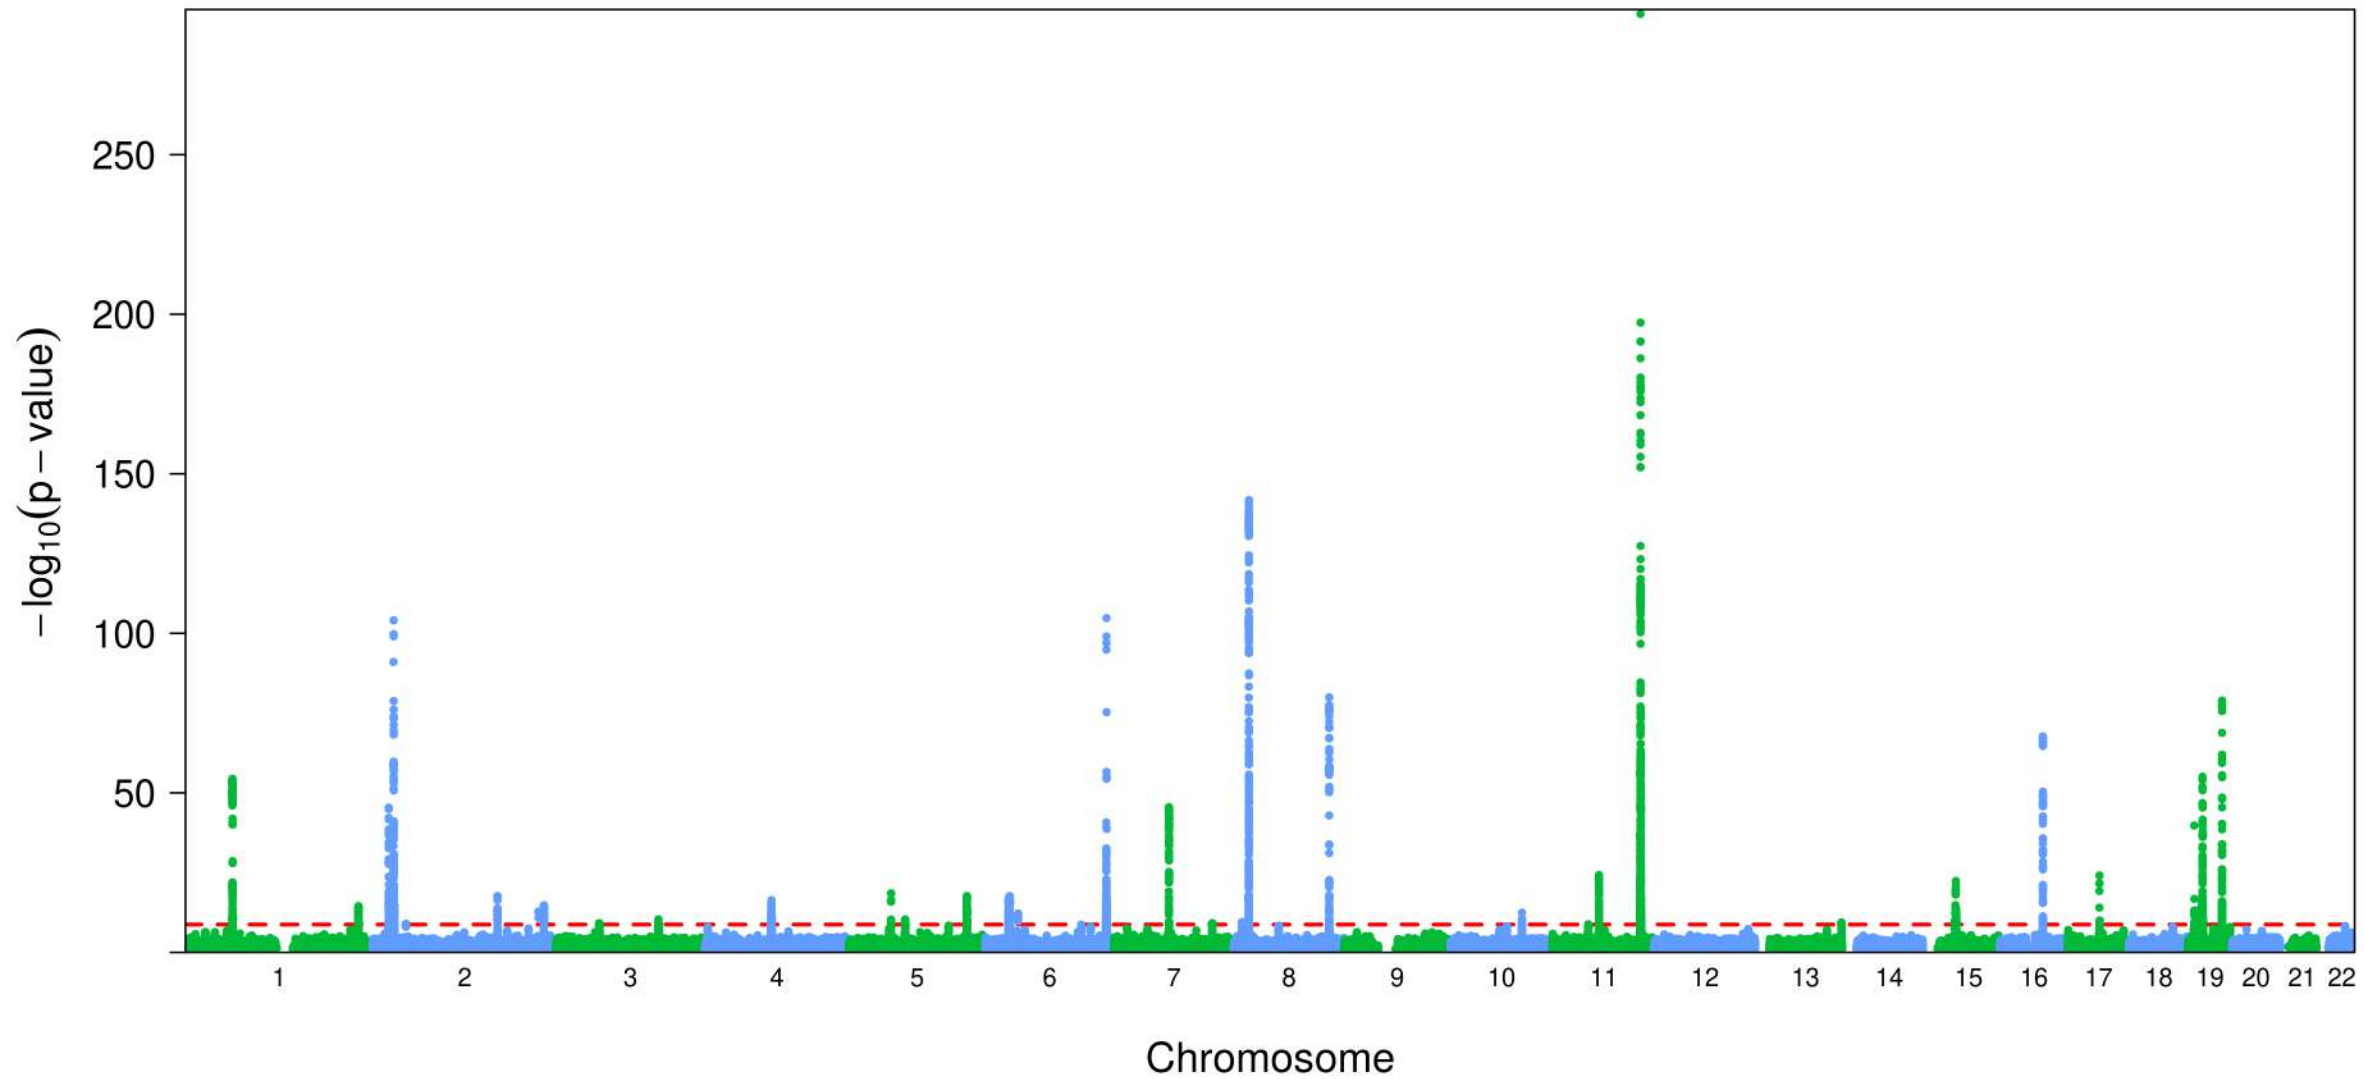



# XL-VLDL-CE\_percent

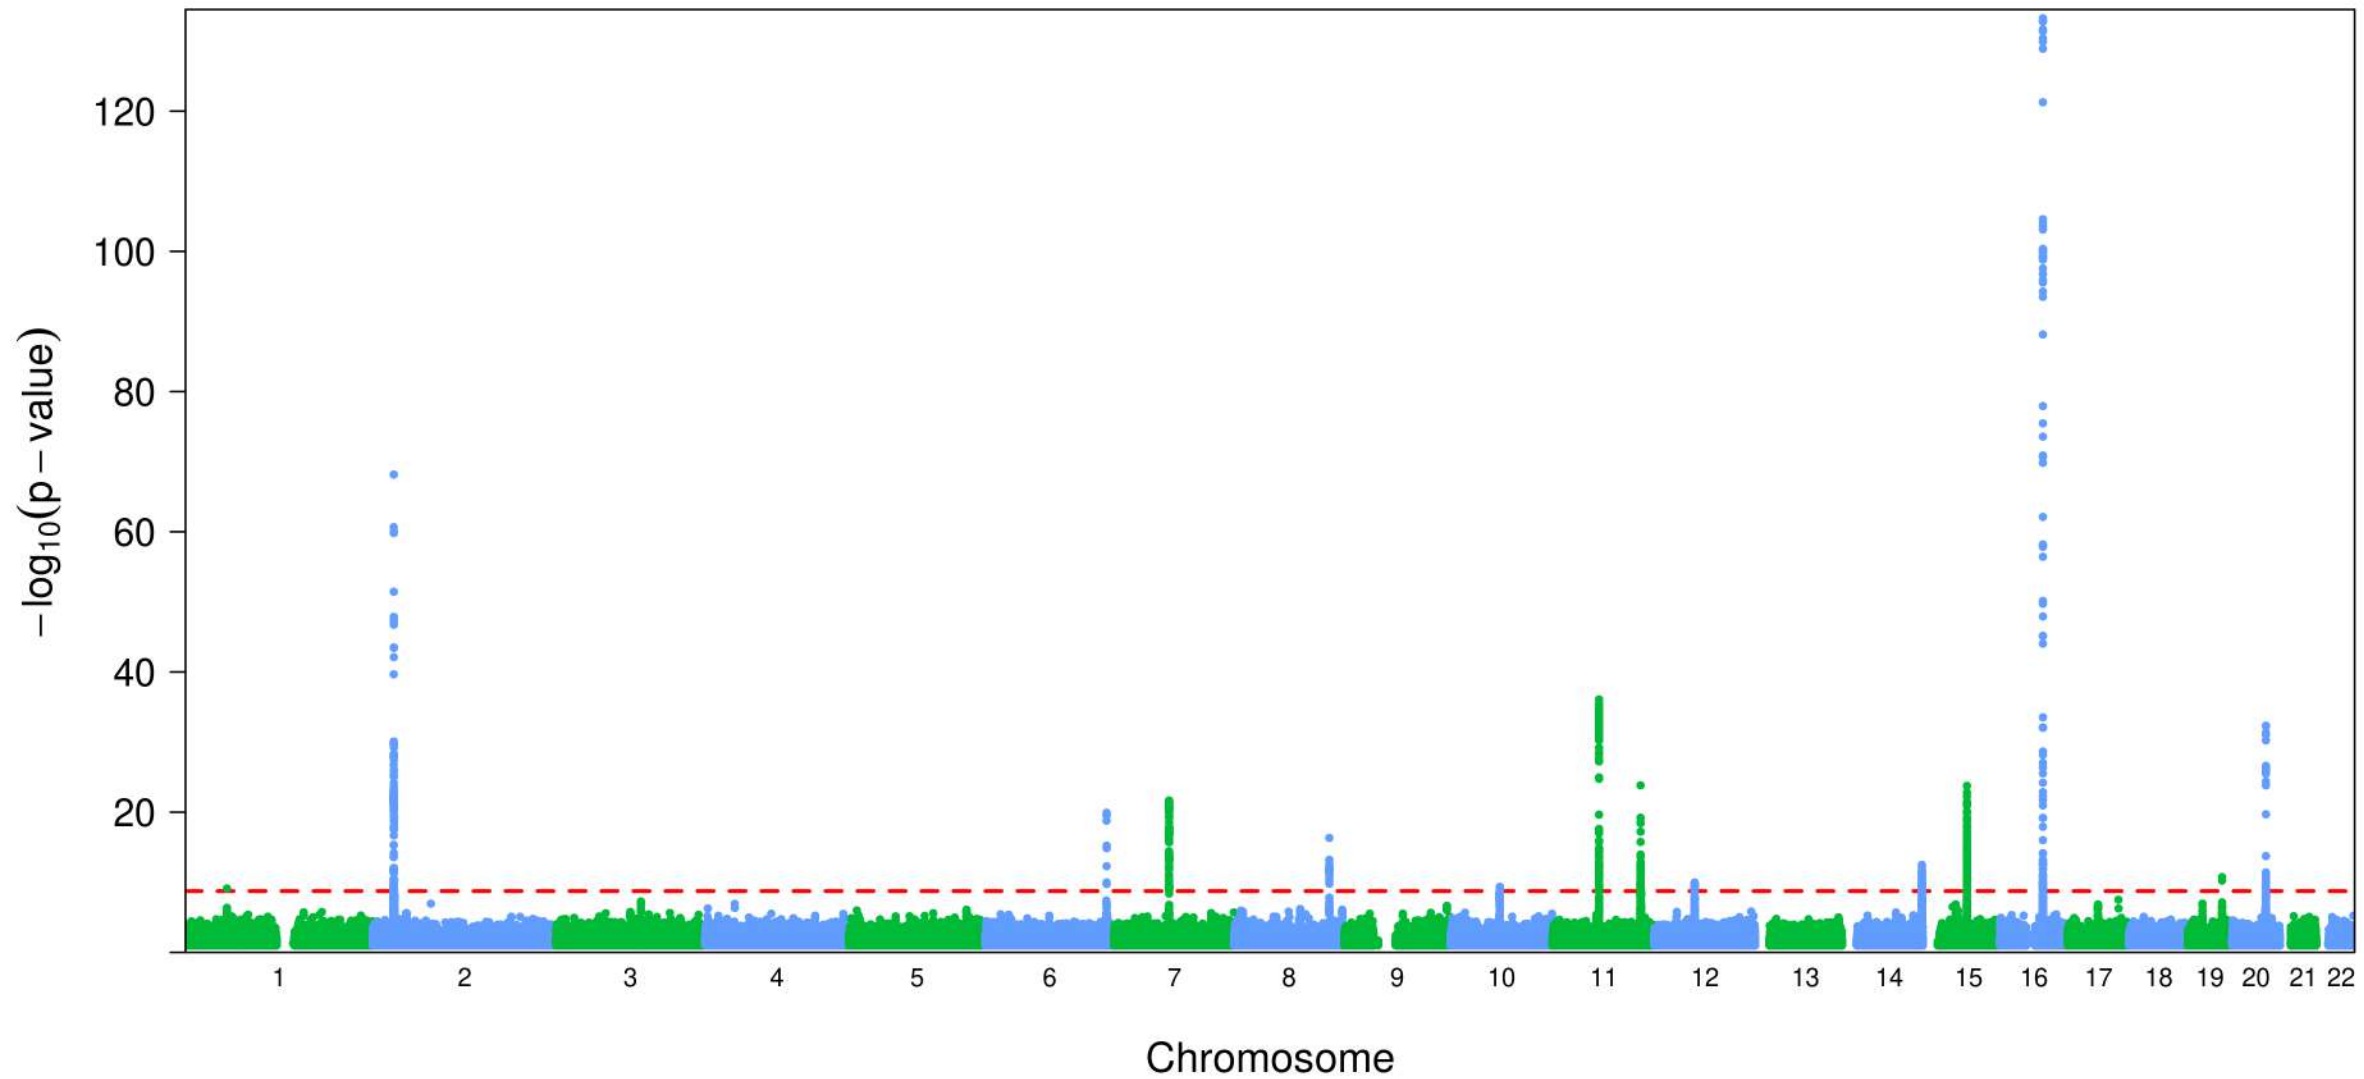

# XL-VLDL-FC

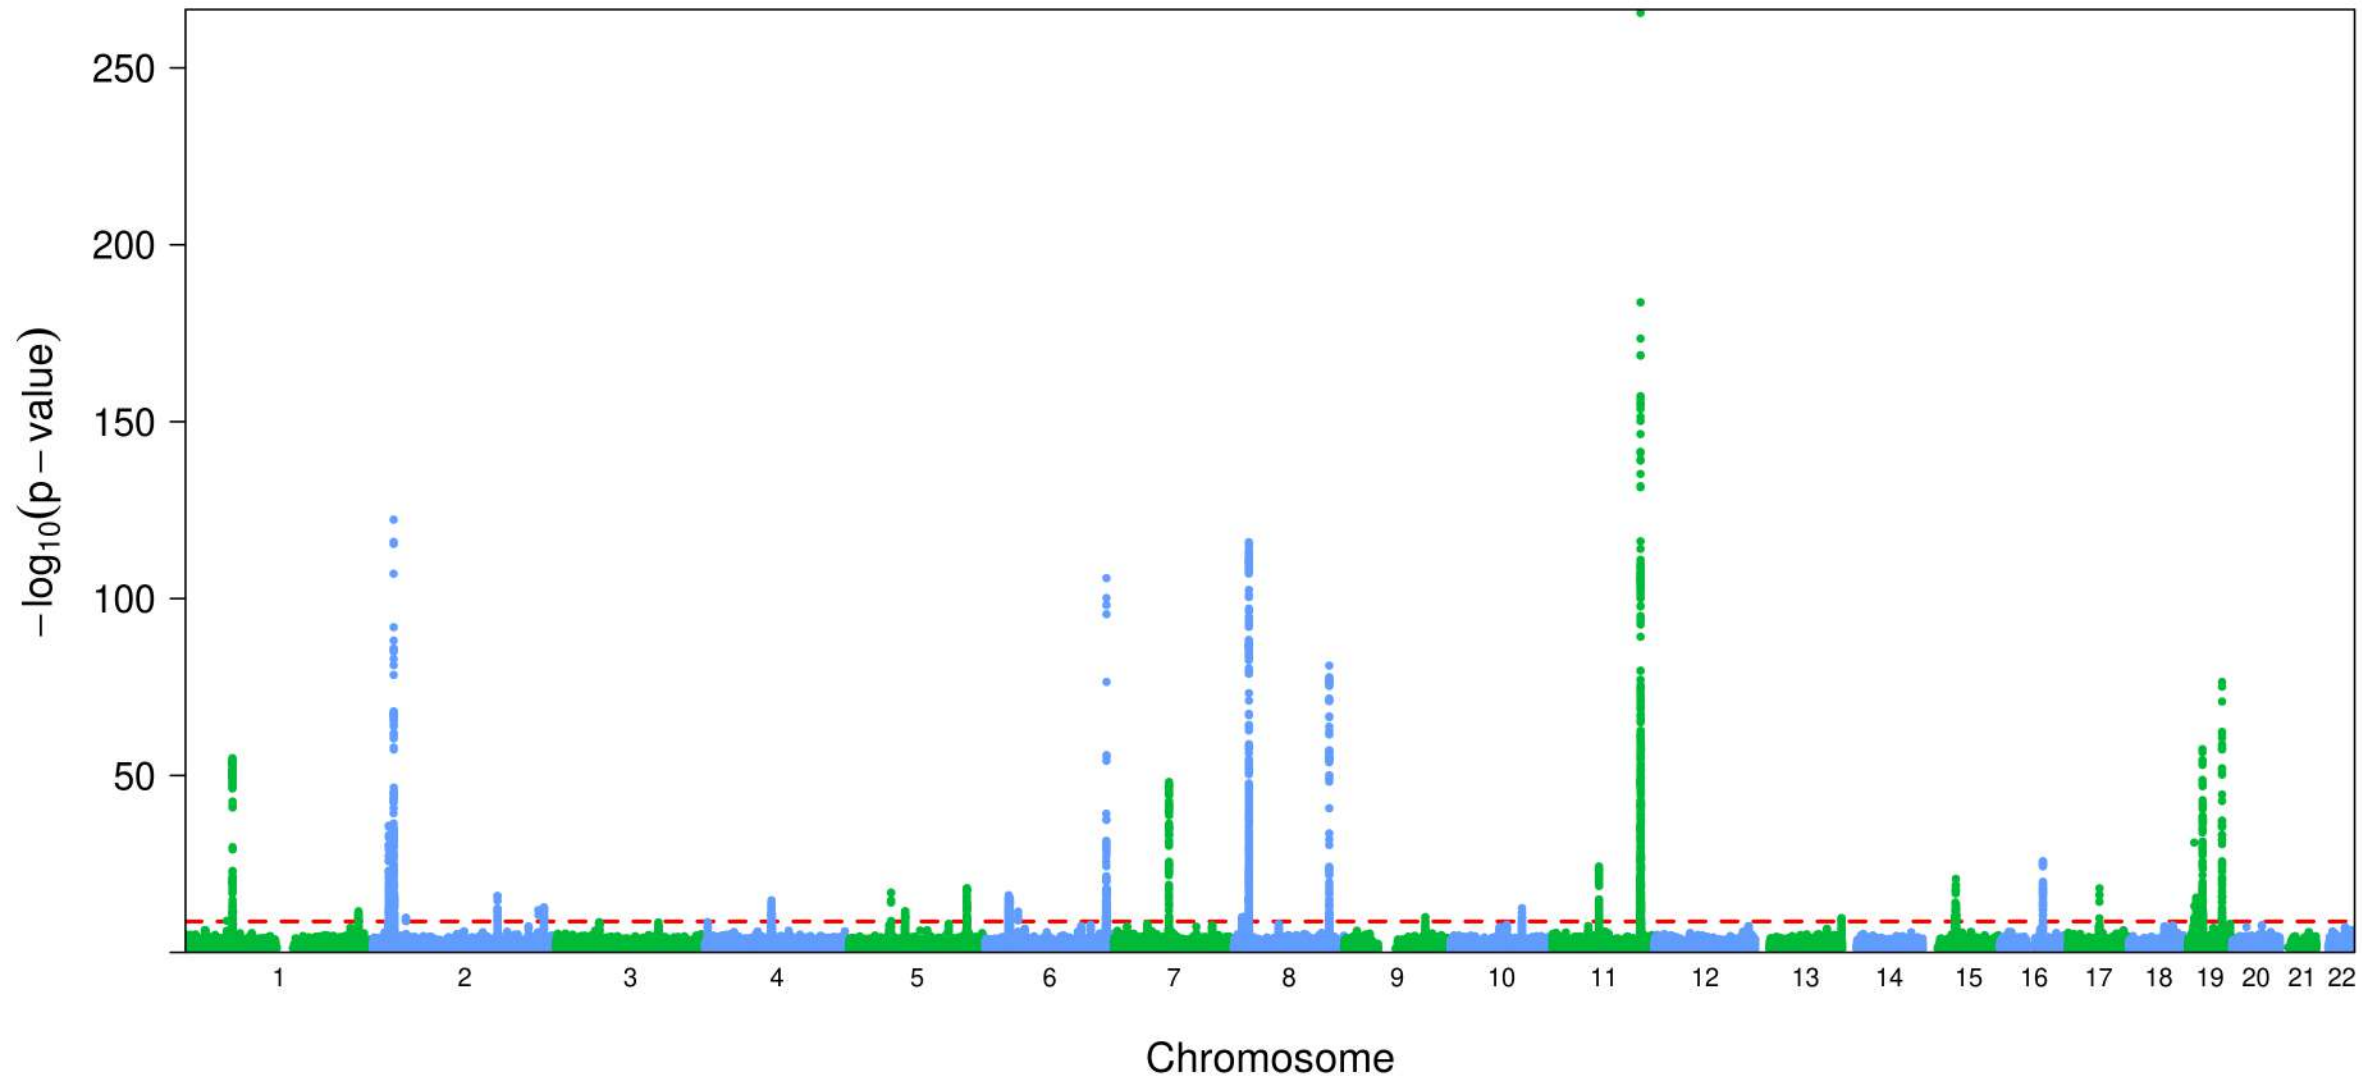

# XL-VLDL-FC\_percent

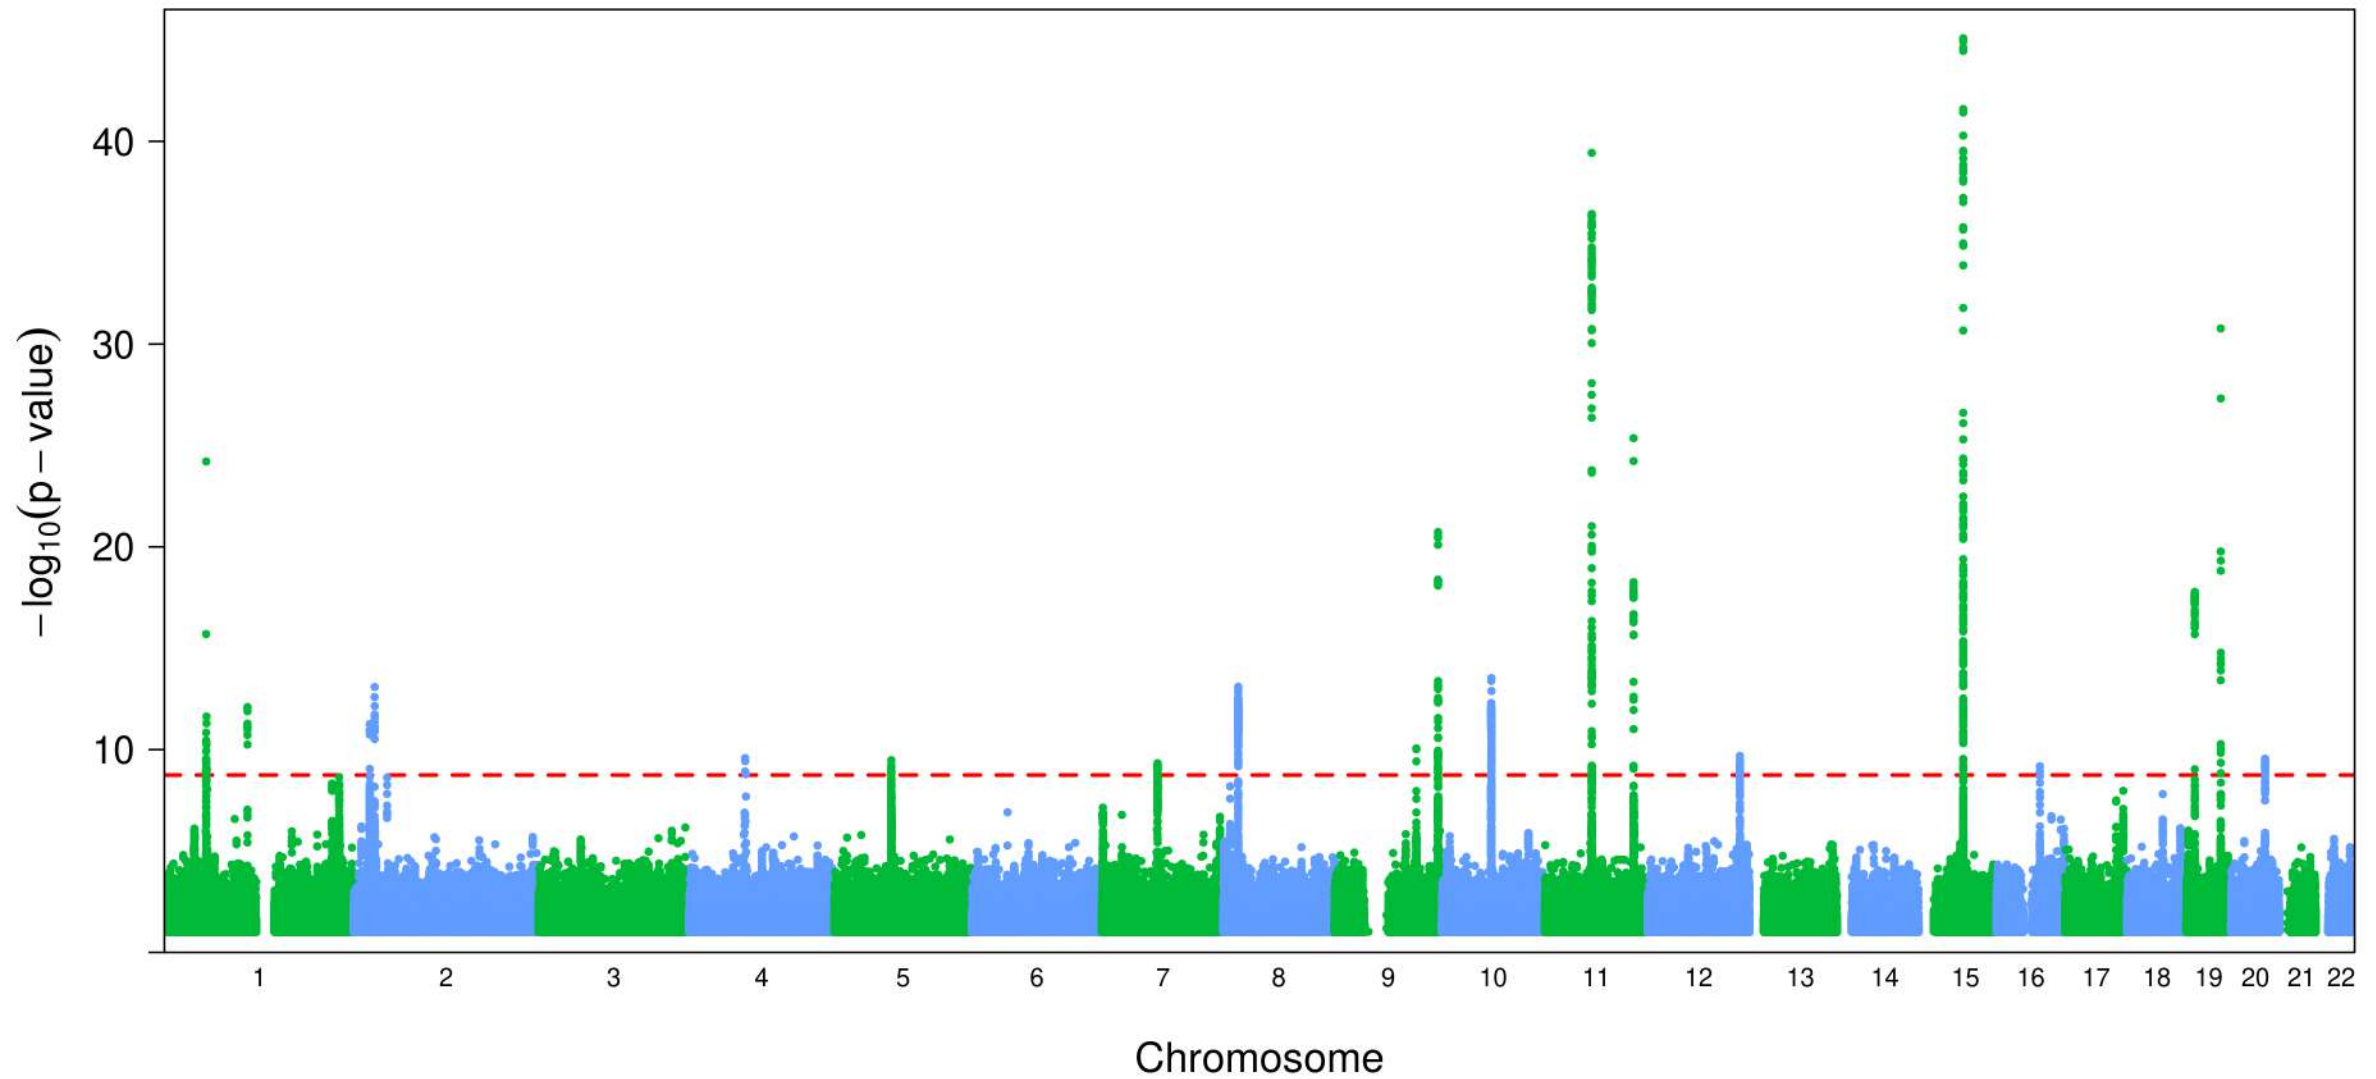

# XL-VLDL-L

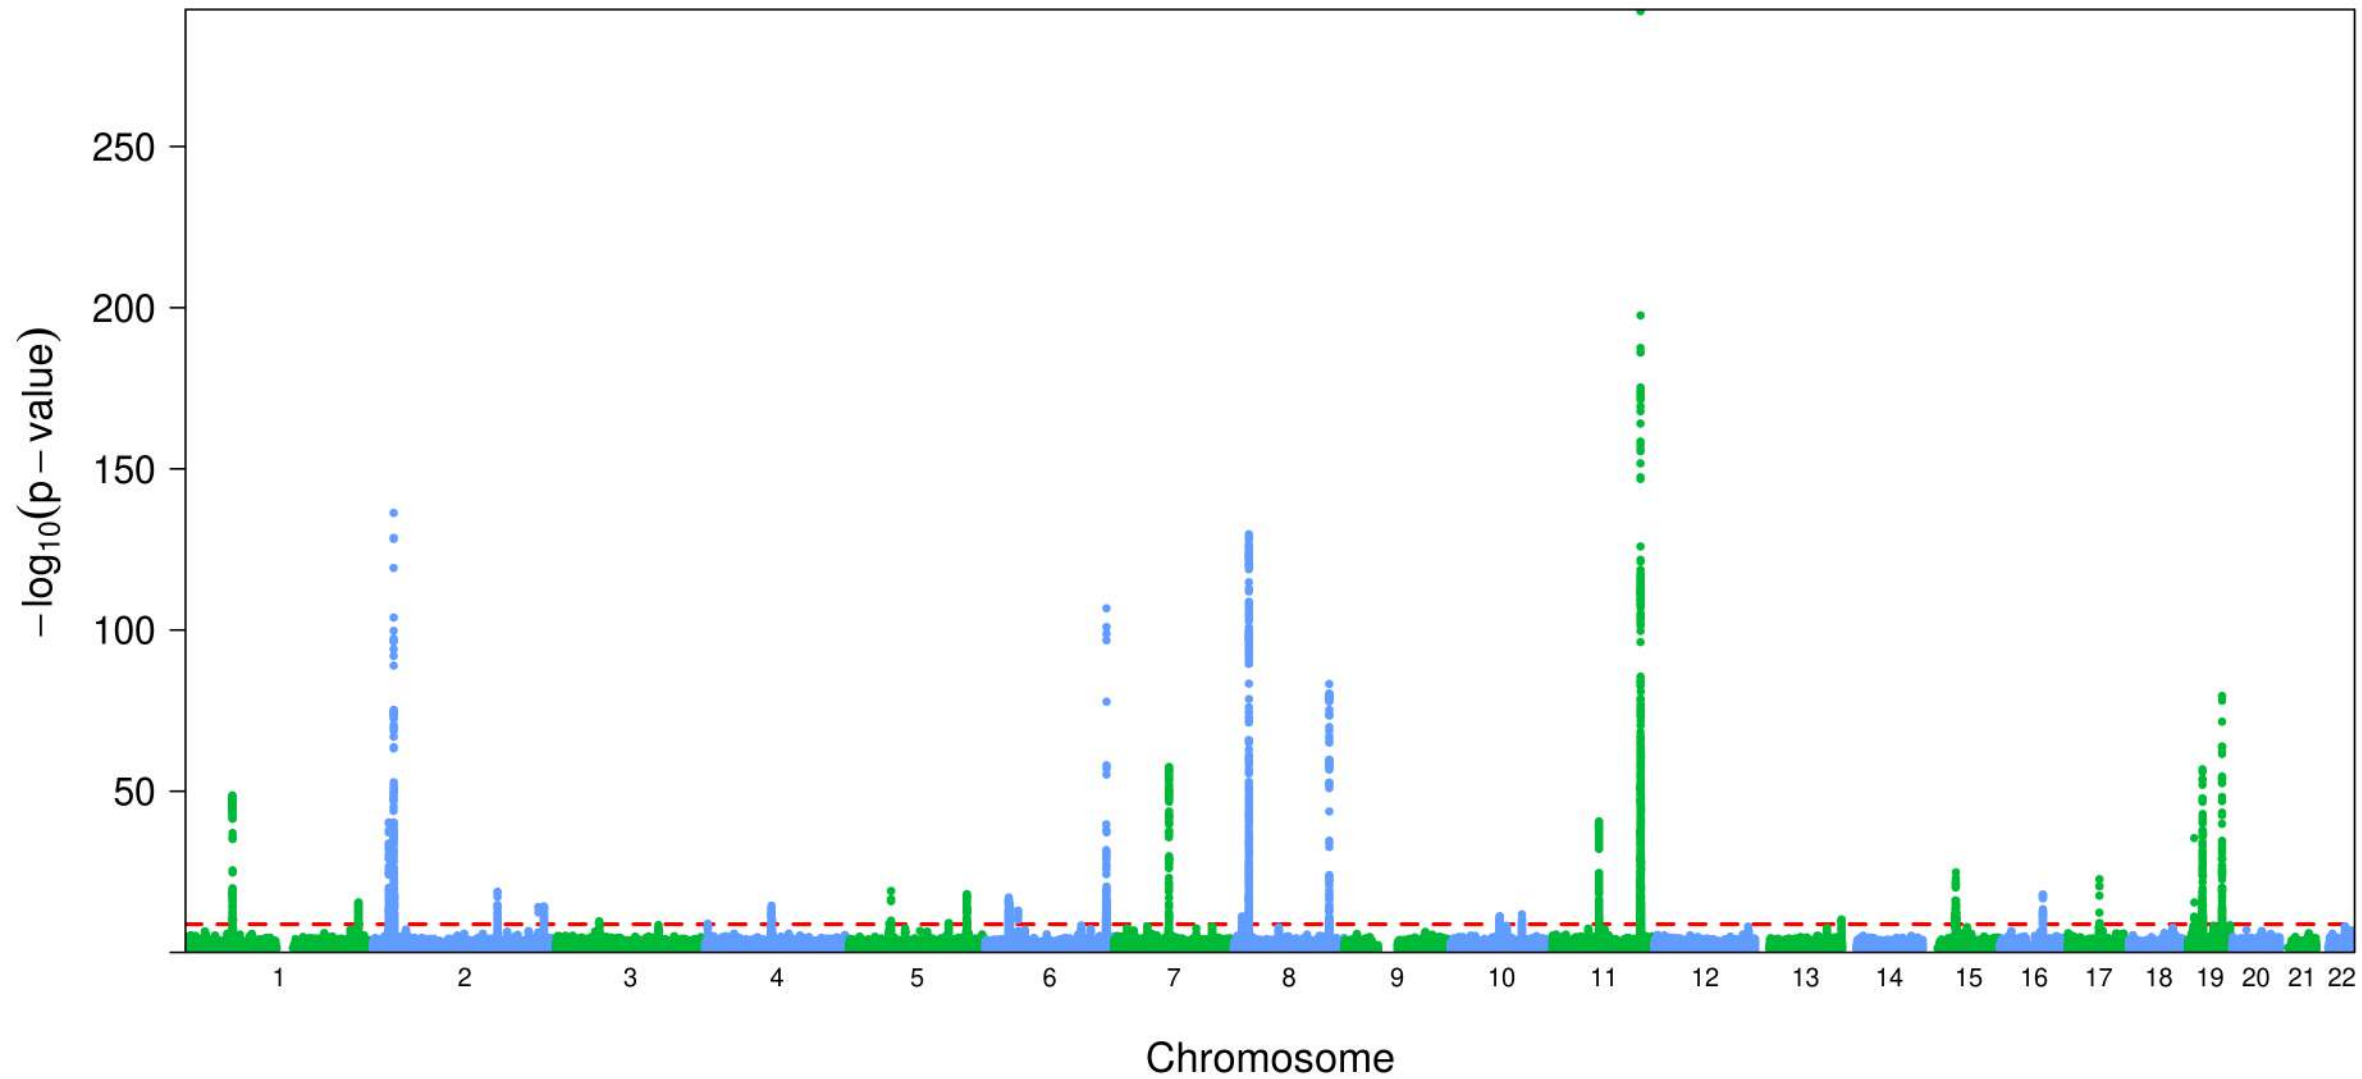

# XL-VLDL-P

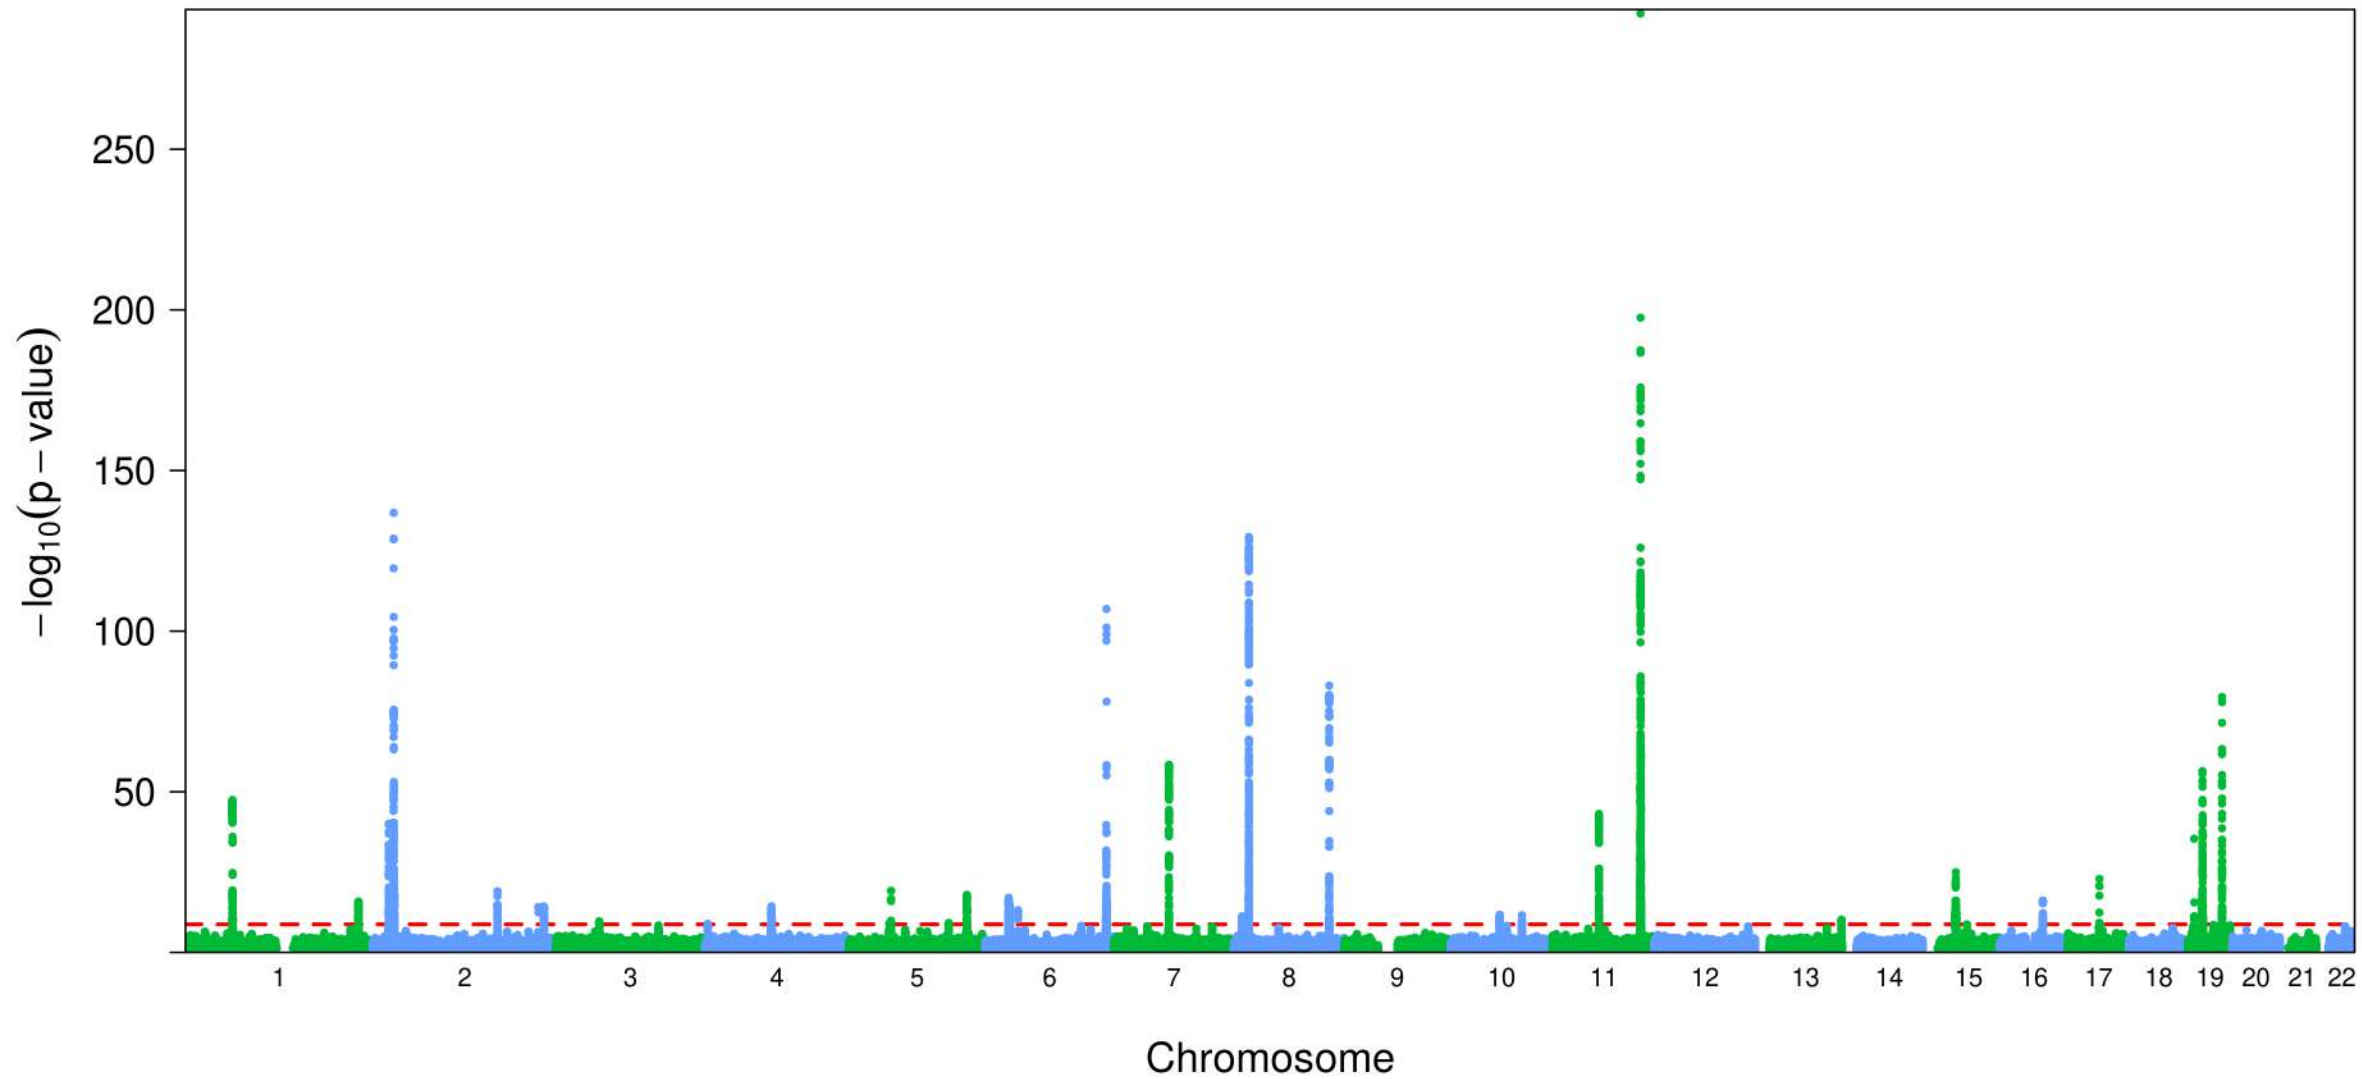

# XL-VLDL-PL

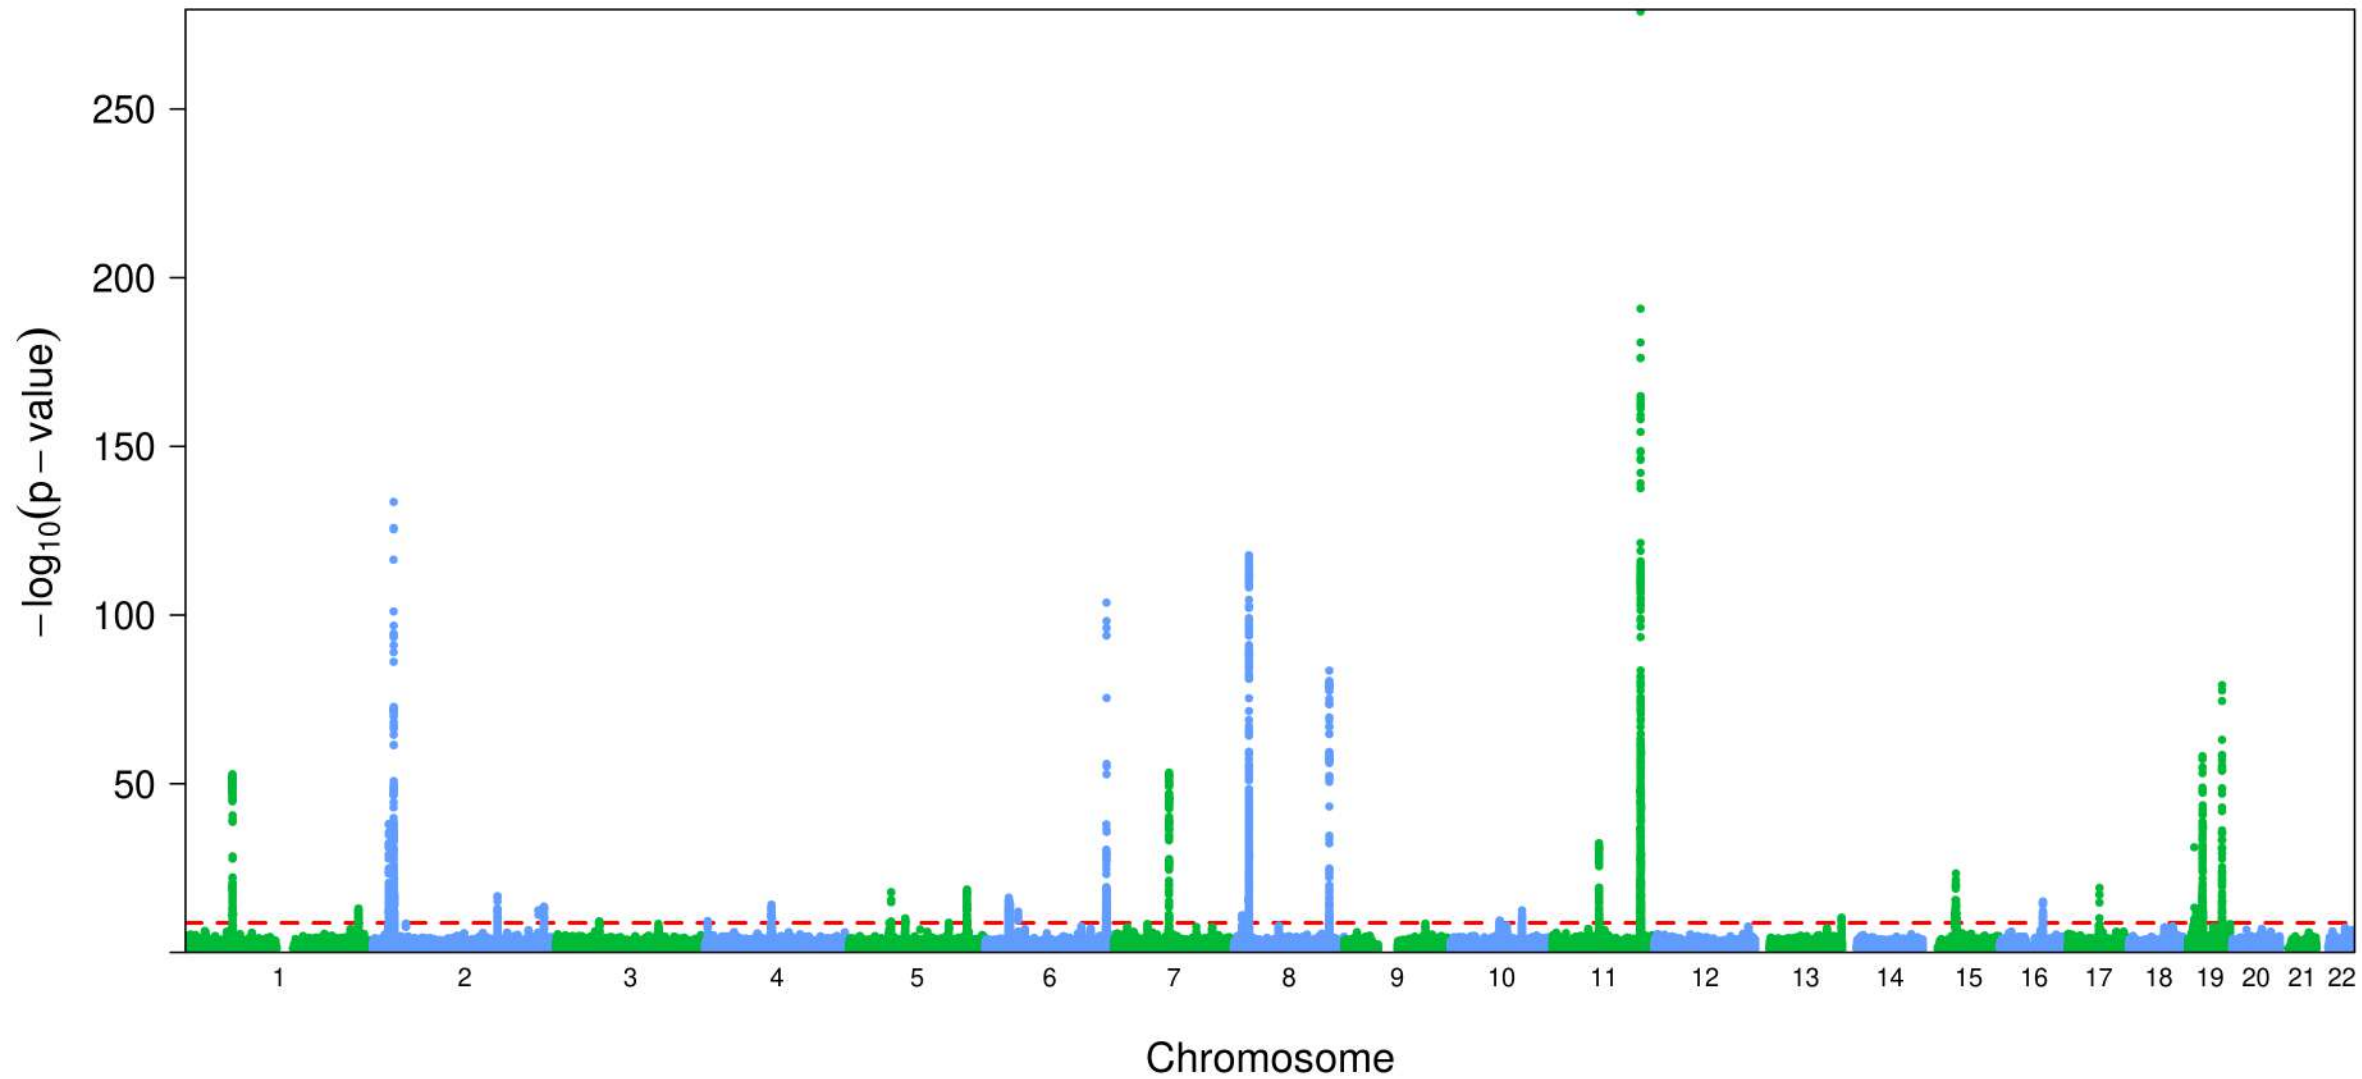

# XL-VLDL-PL\_percent

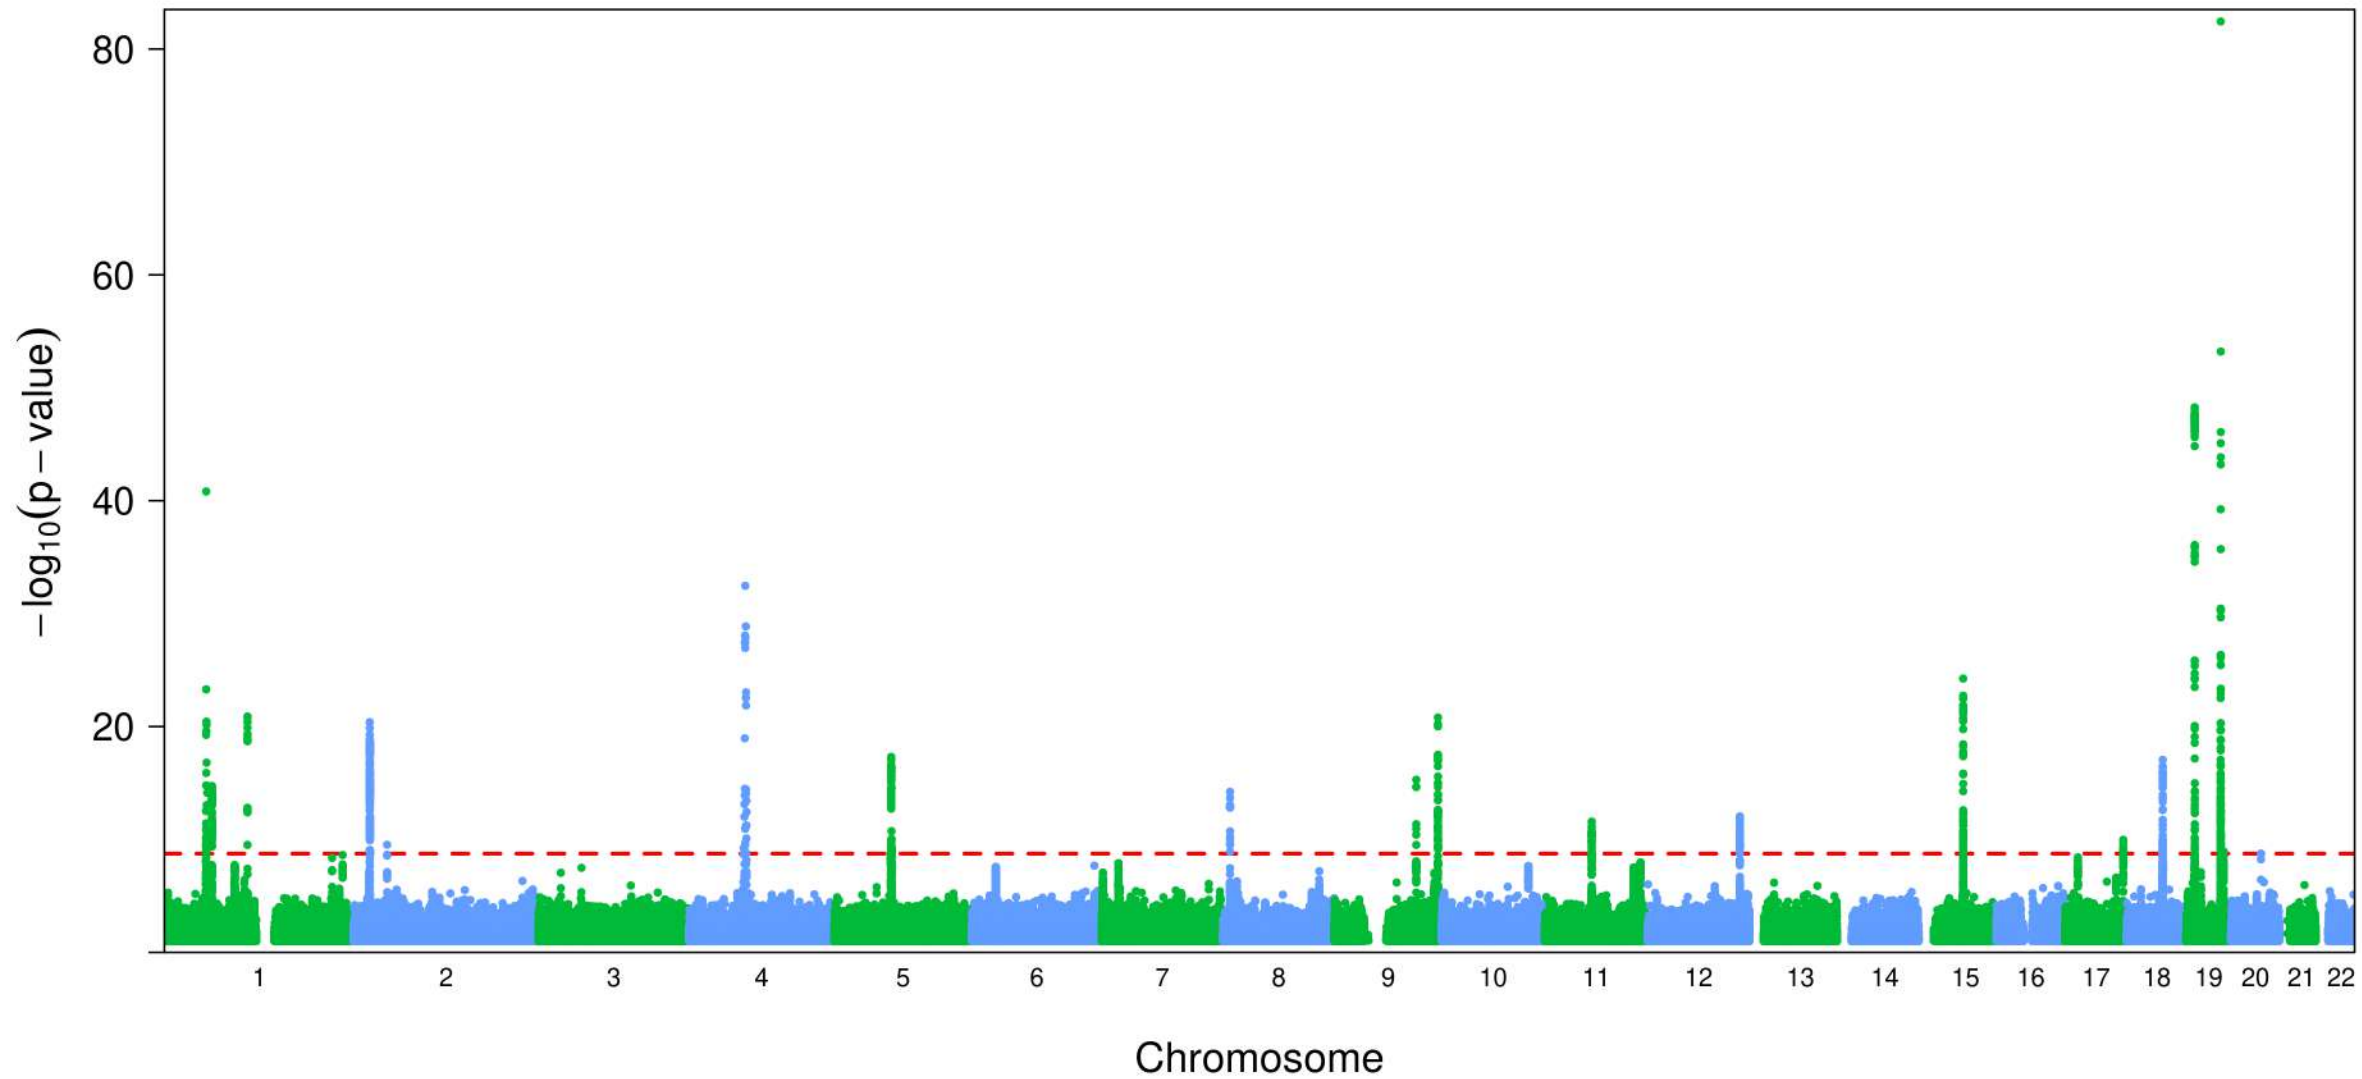

# XL-VLDL-TG

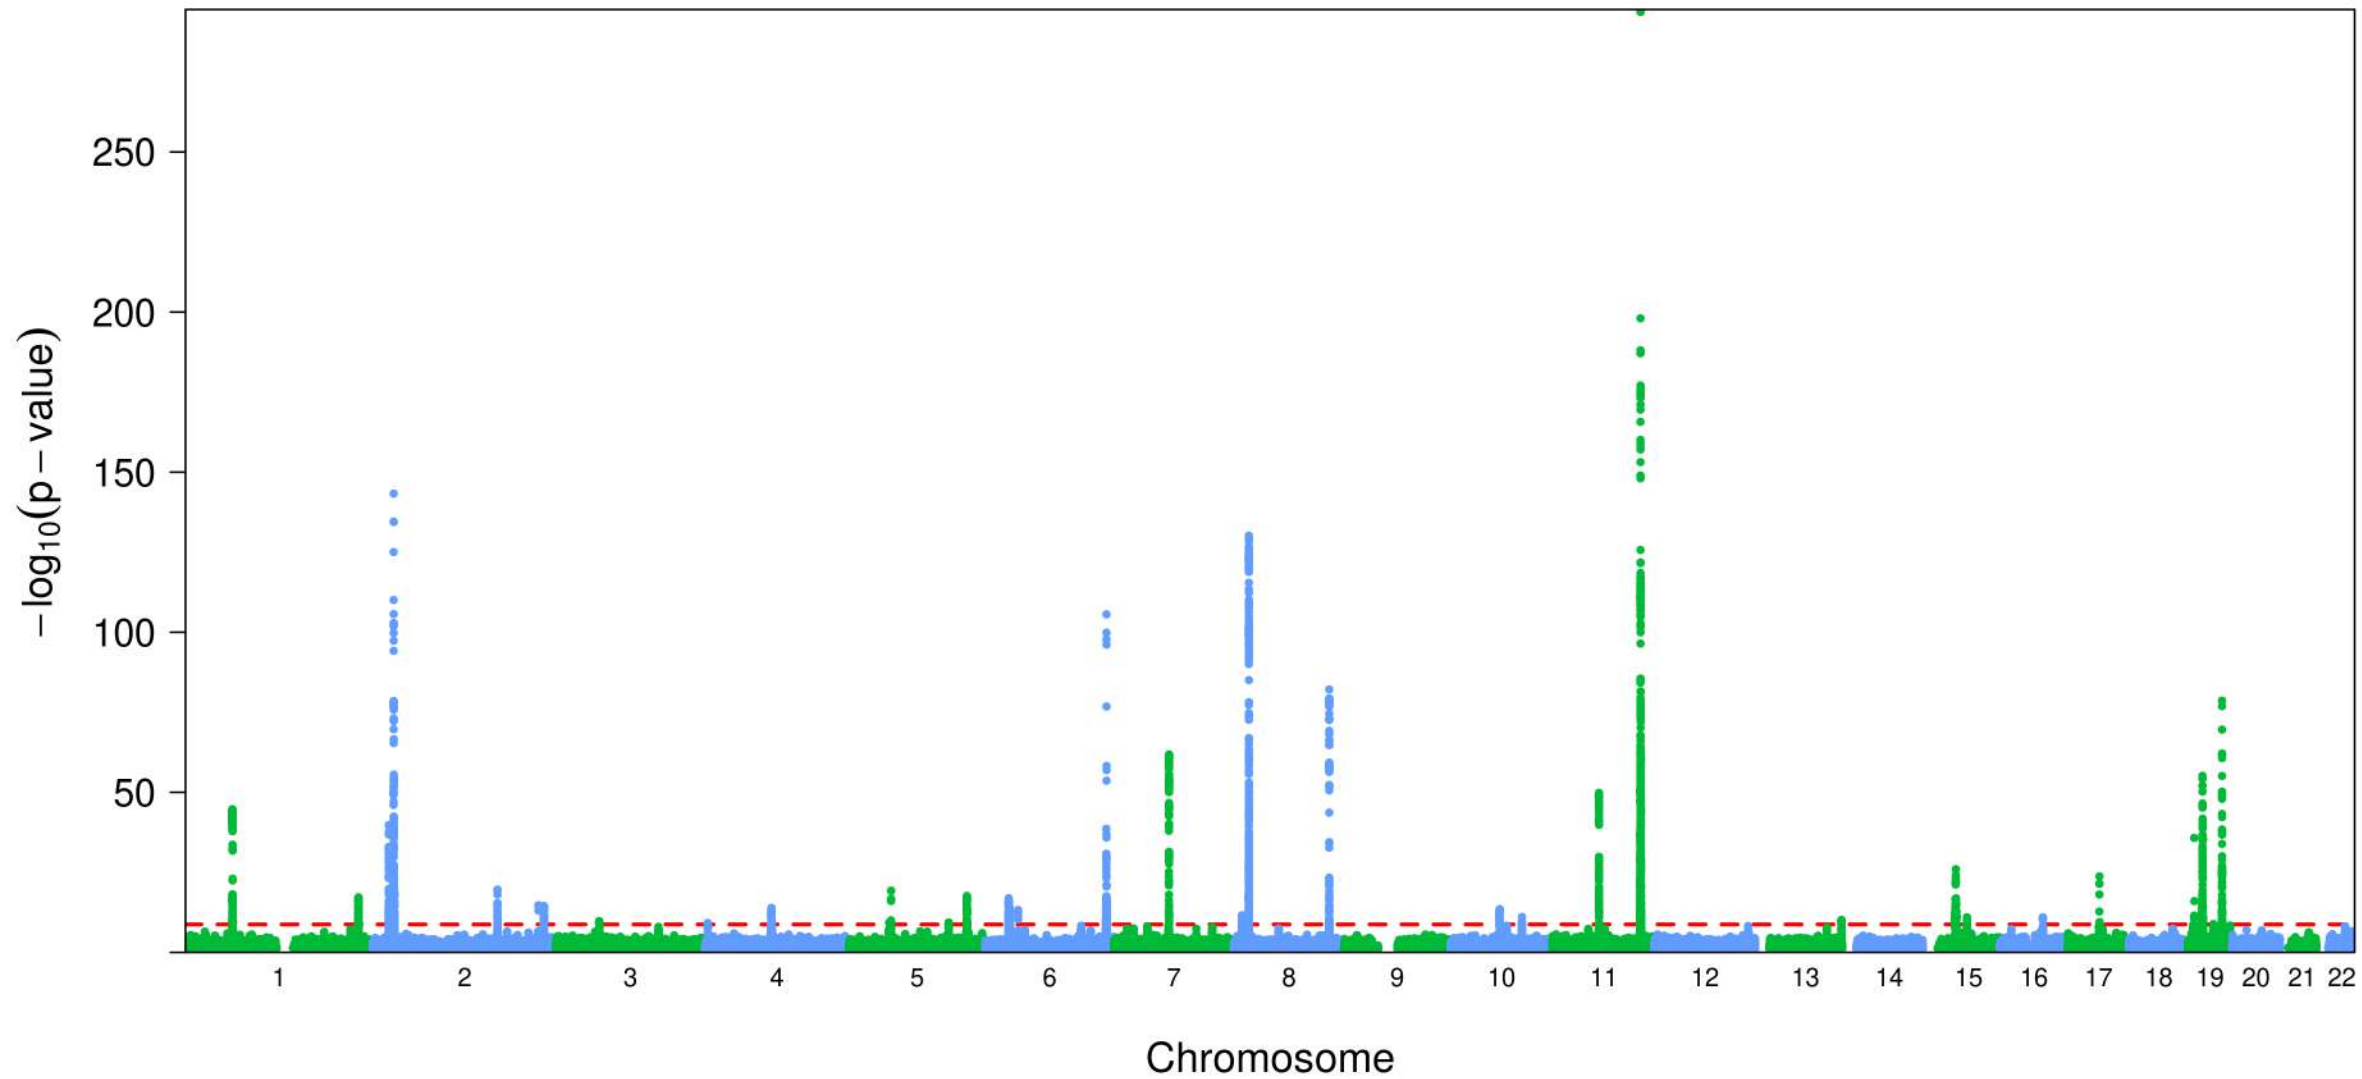



## XL-VLDL-TG\_percent

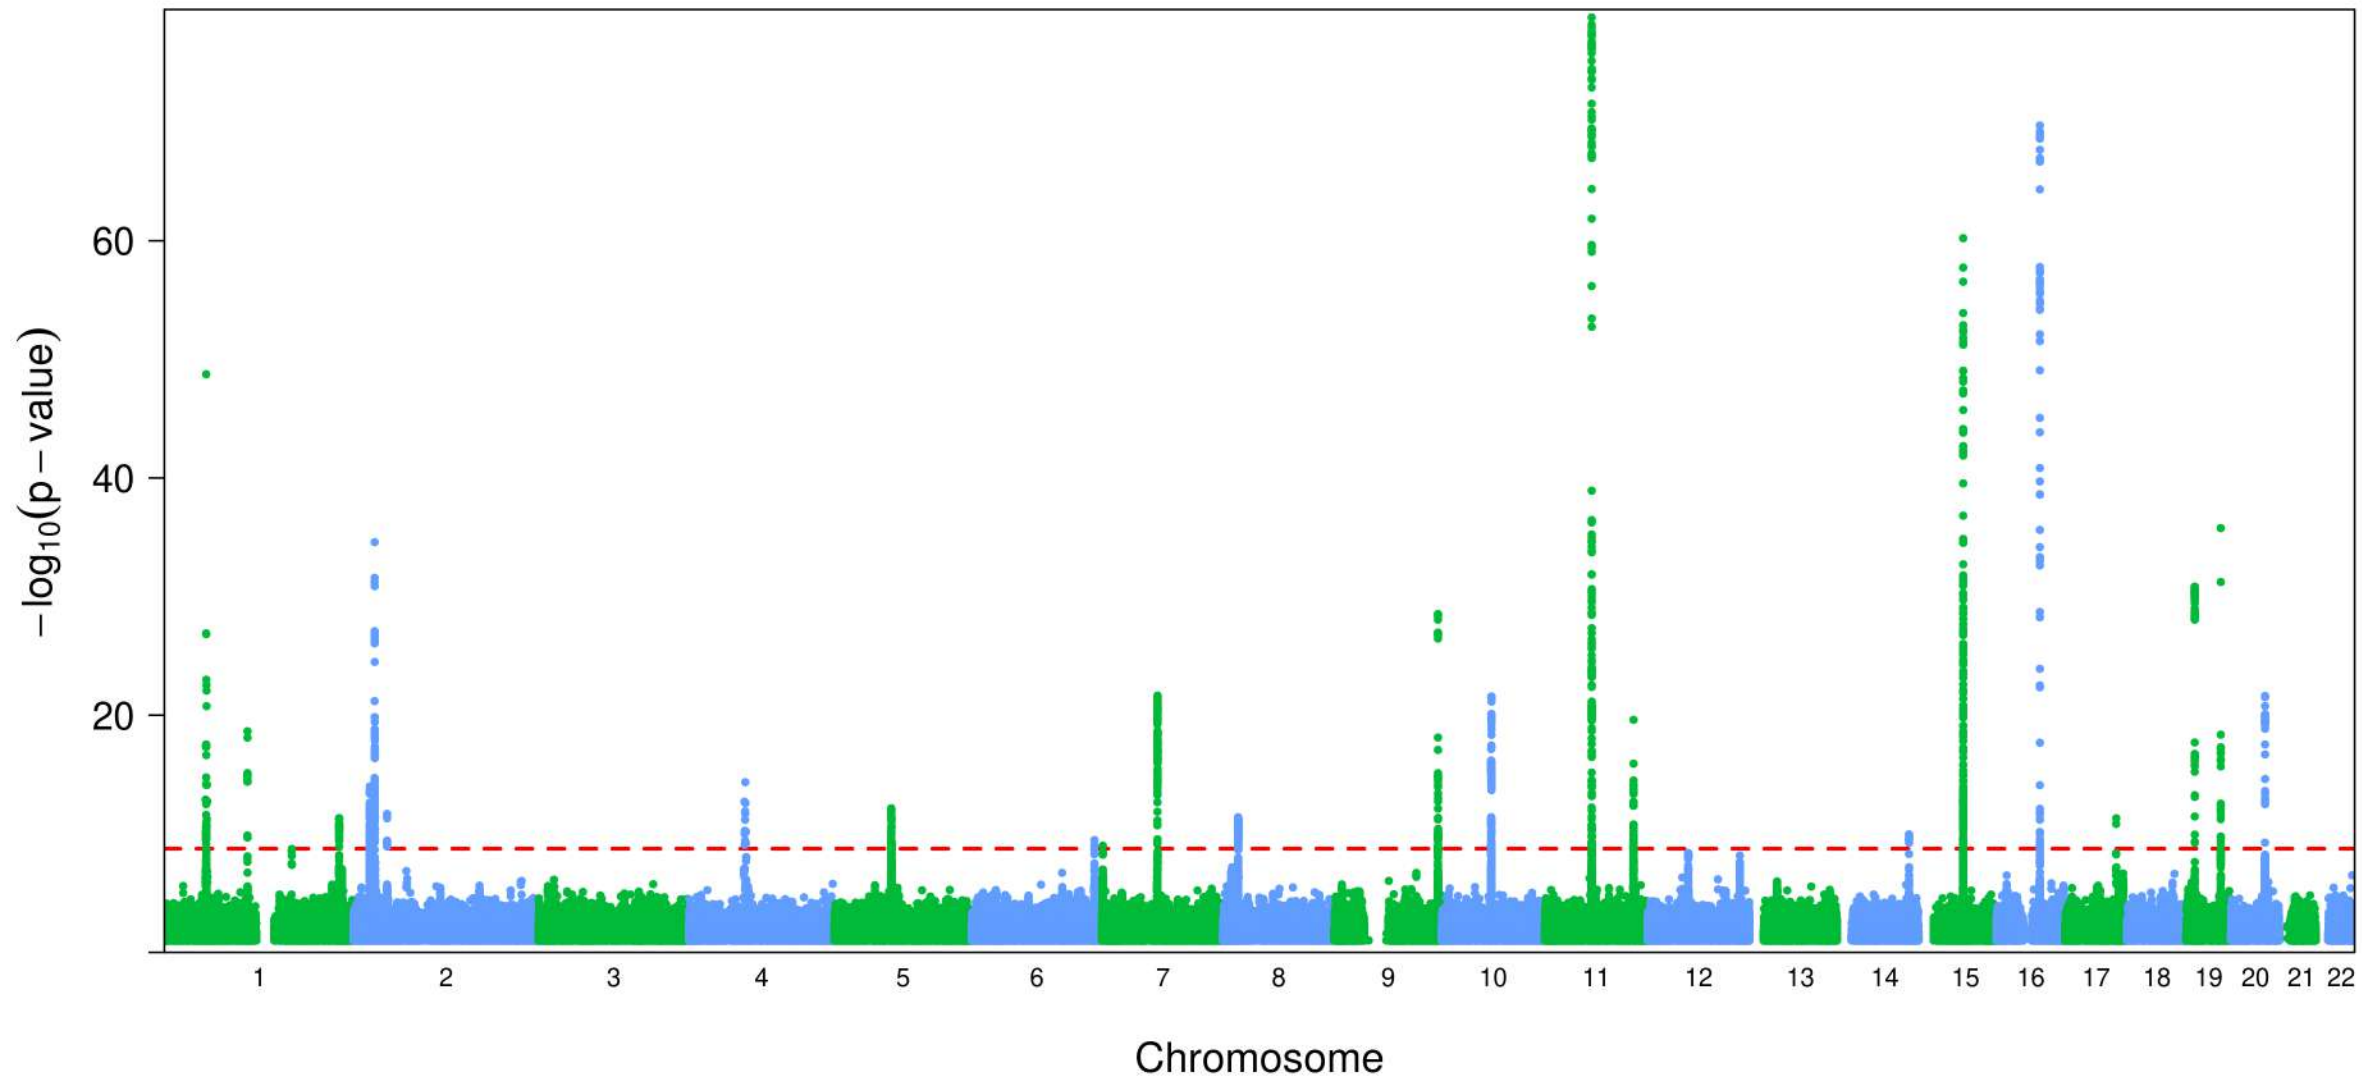

# XS-VLDL-C

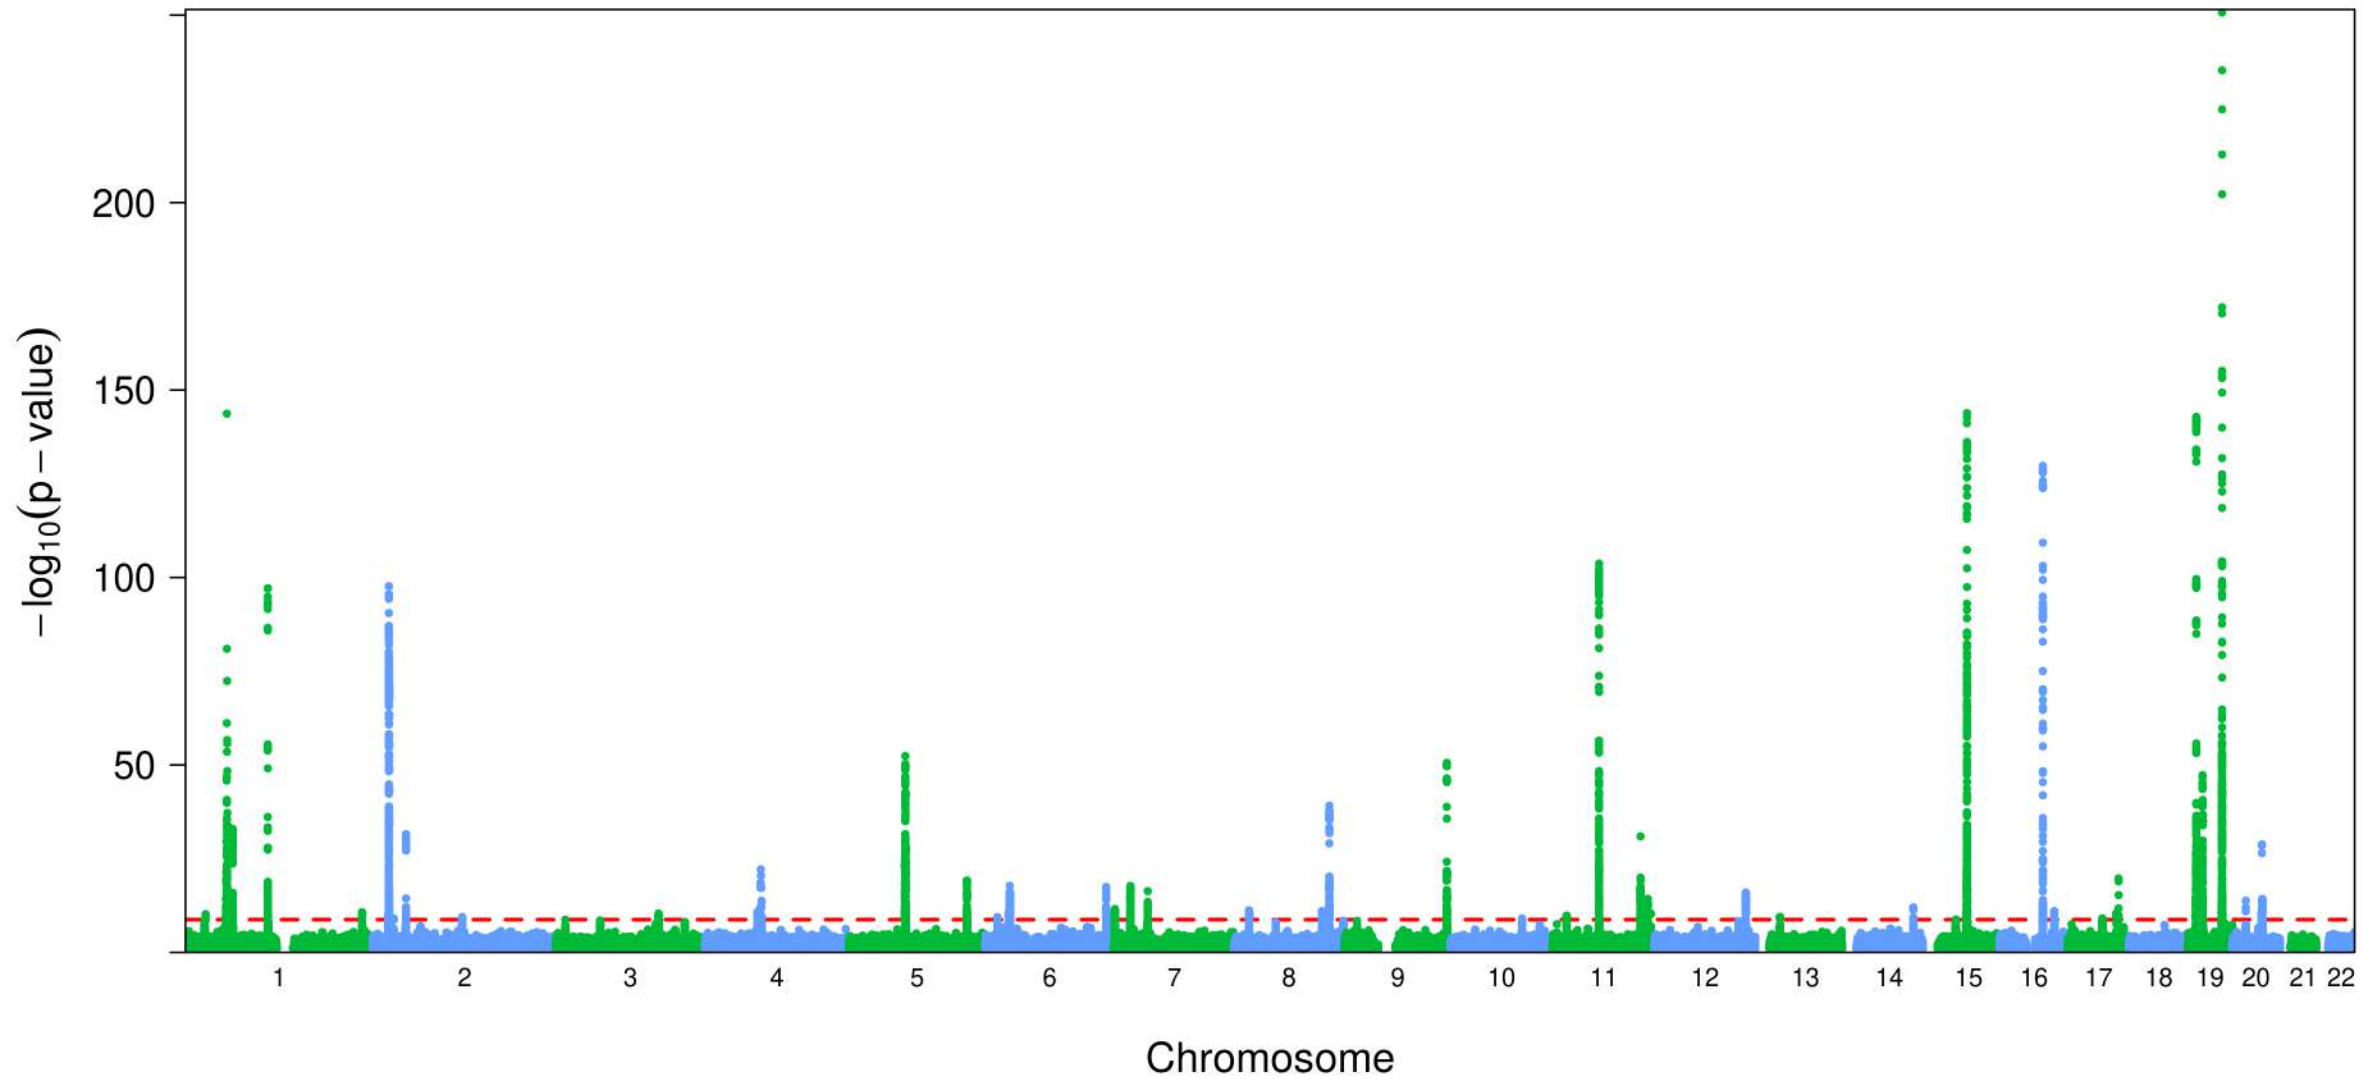

# XS-VLDL-C\_percent

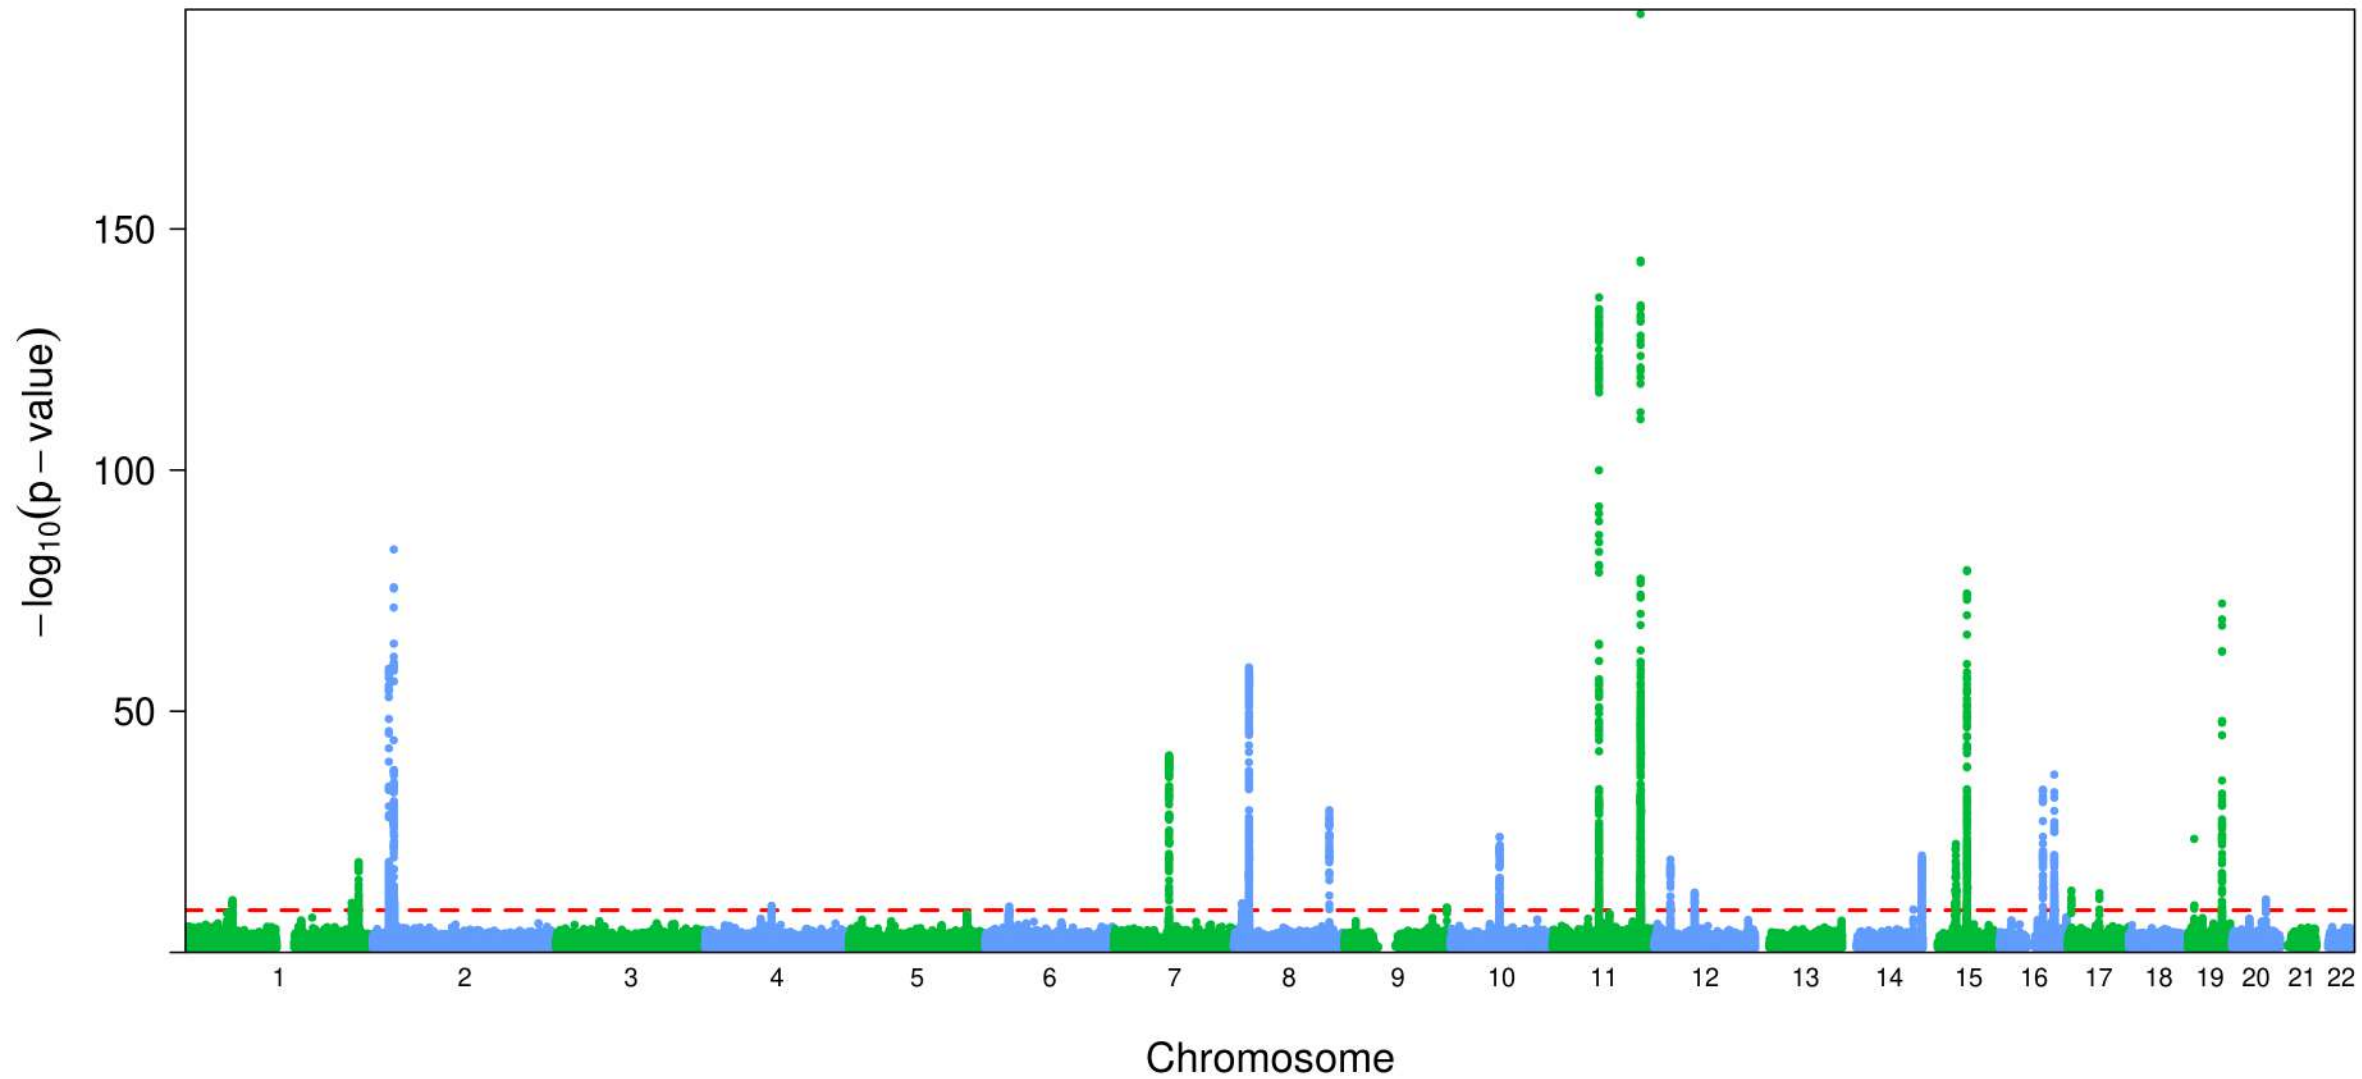

## XS-VLDL-CE

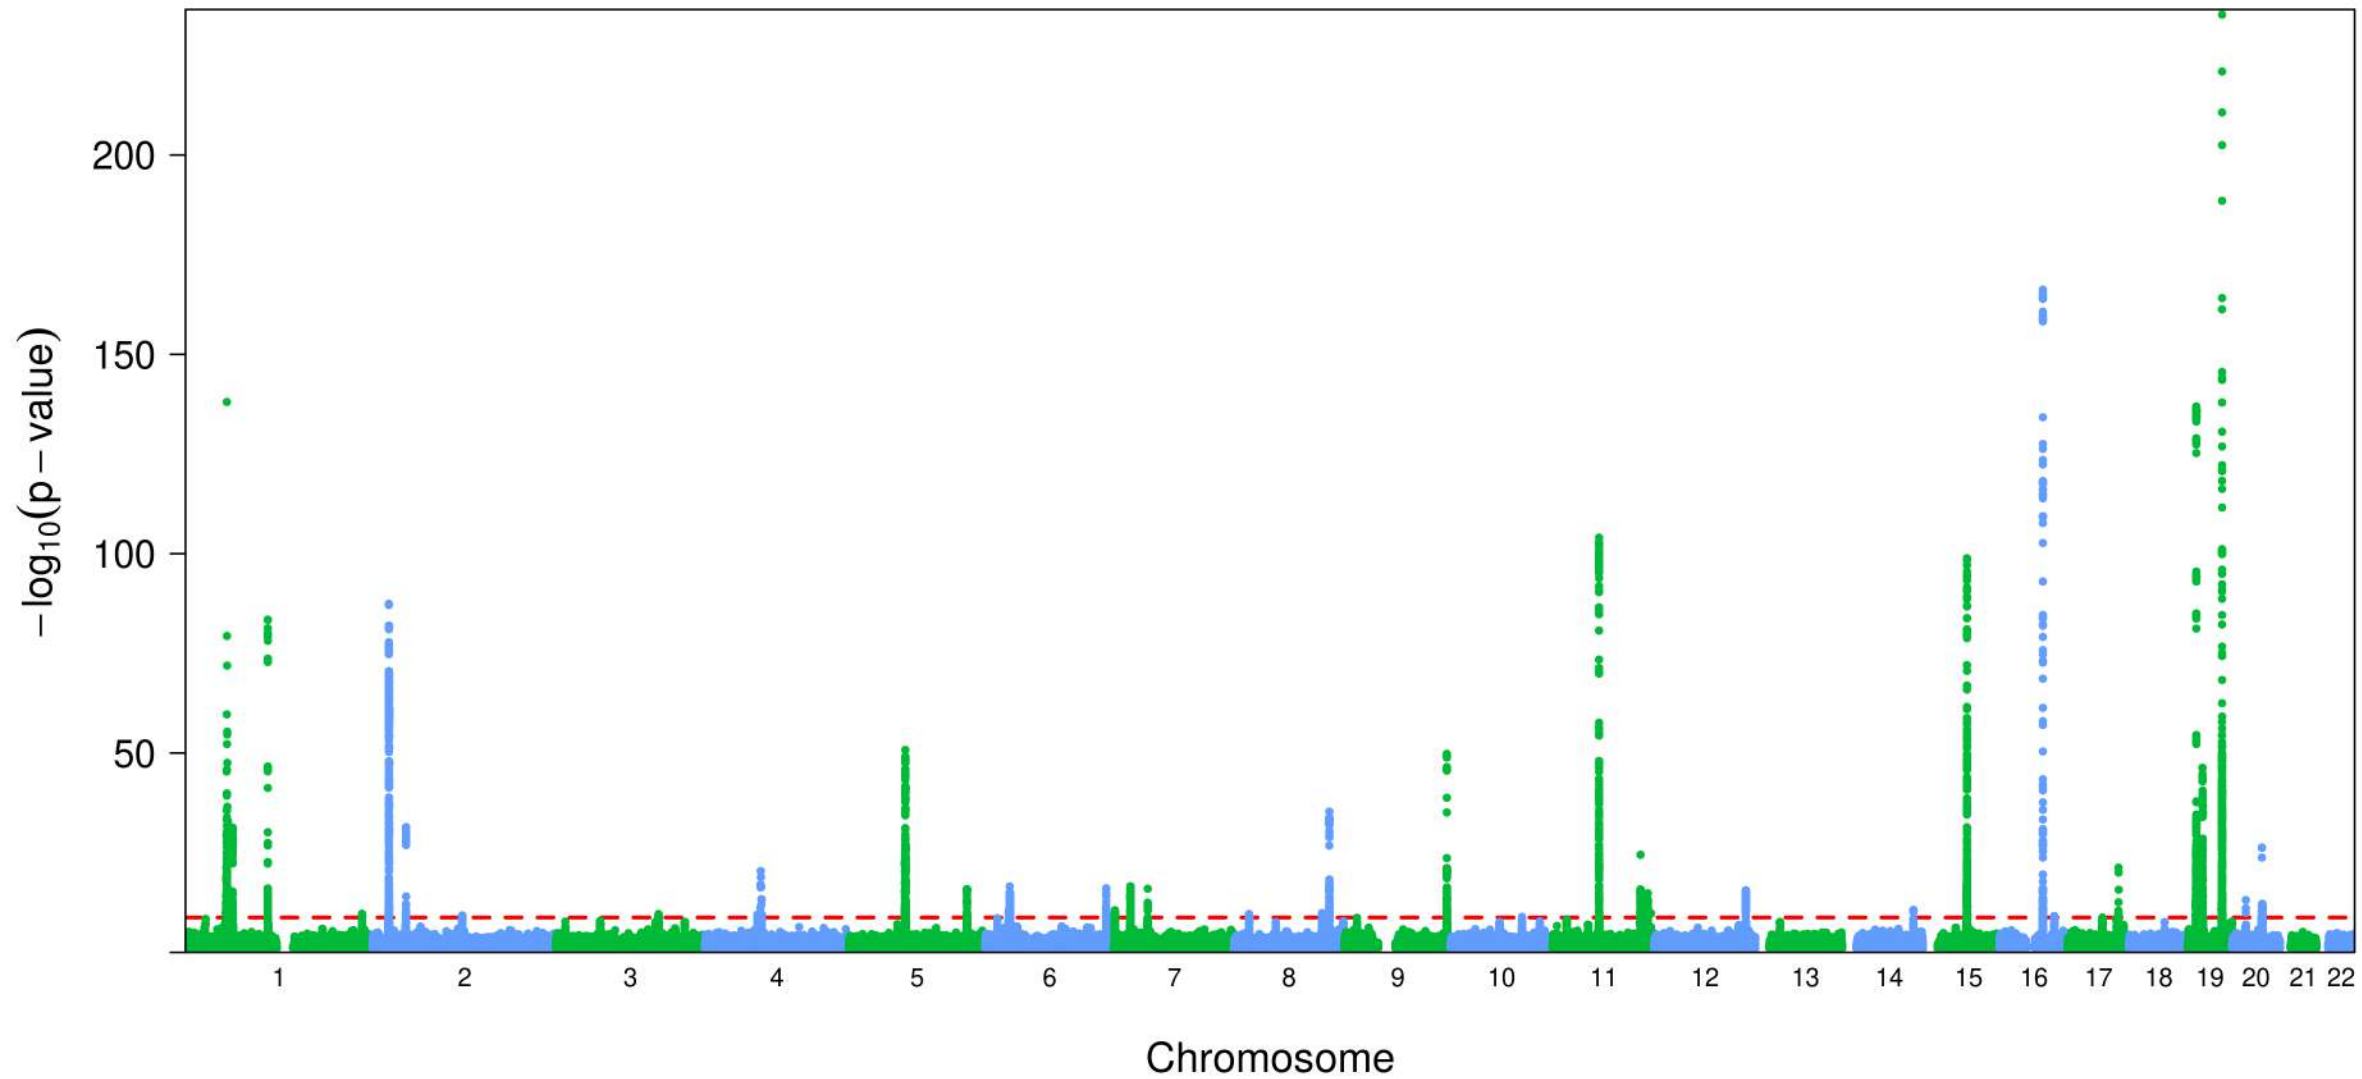

# XS-VLDL-CE\_percent

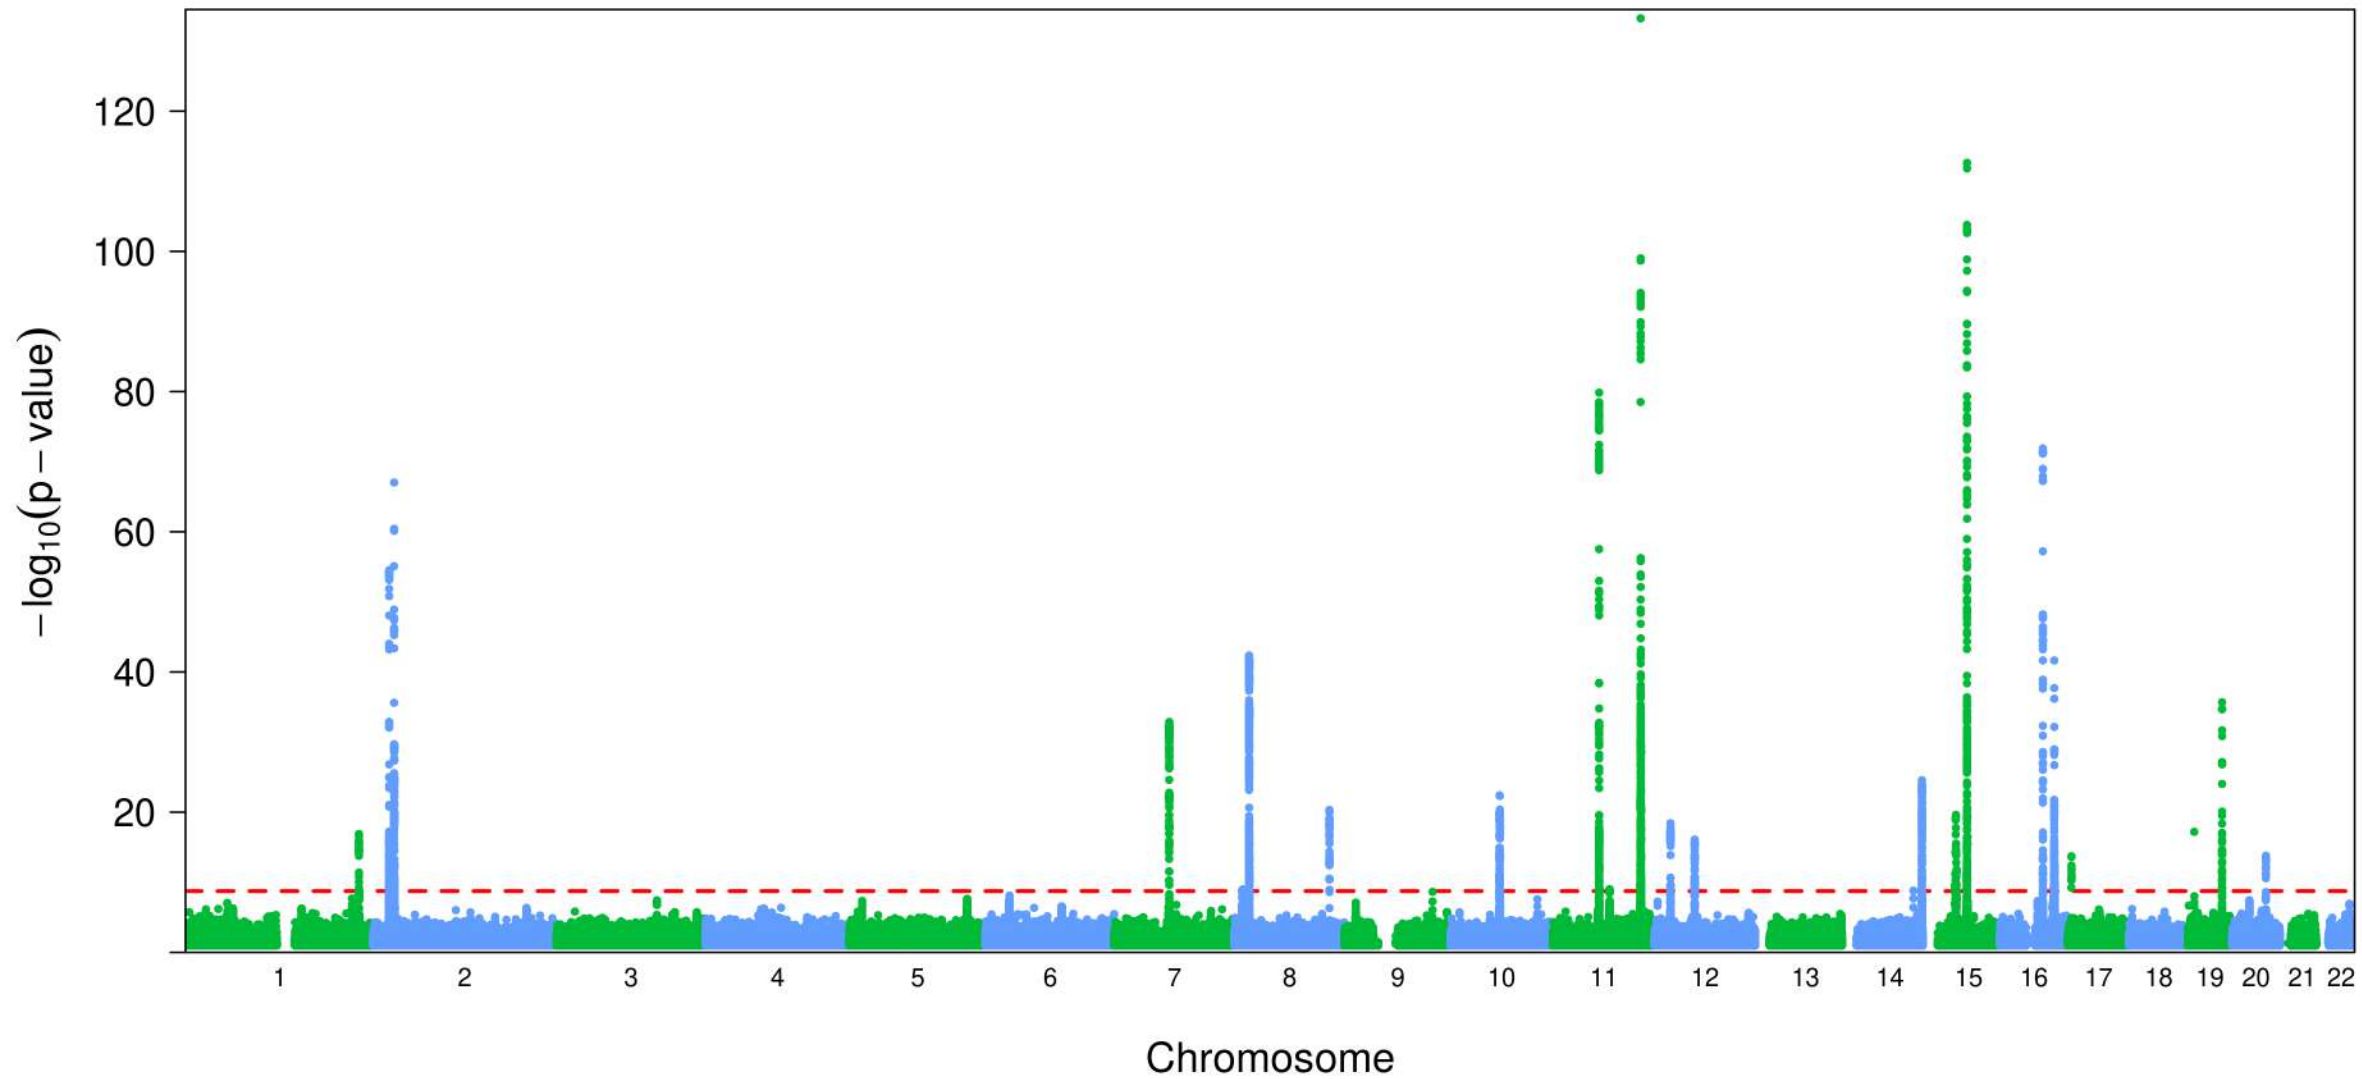

## XS-VLDL-FC

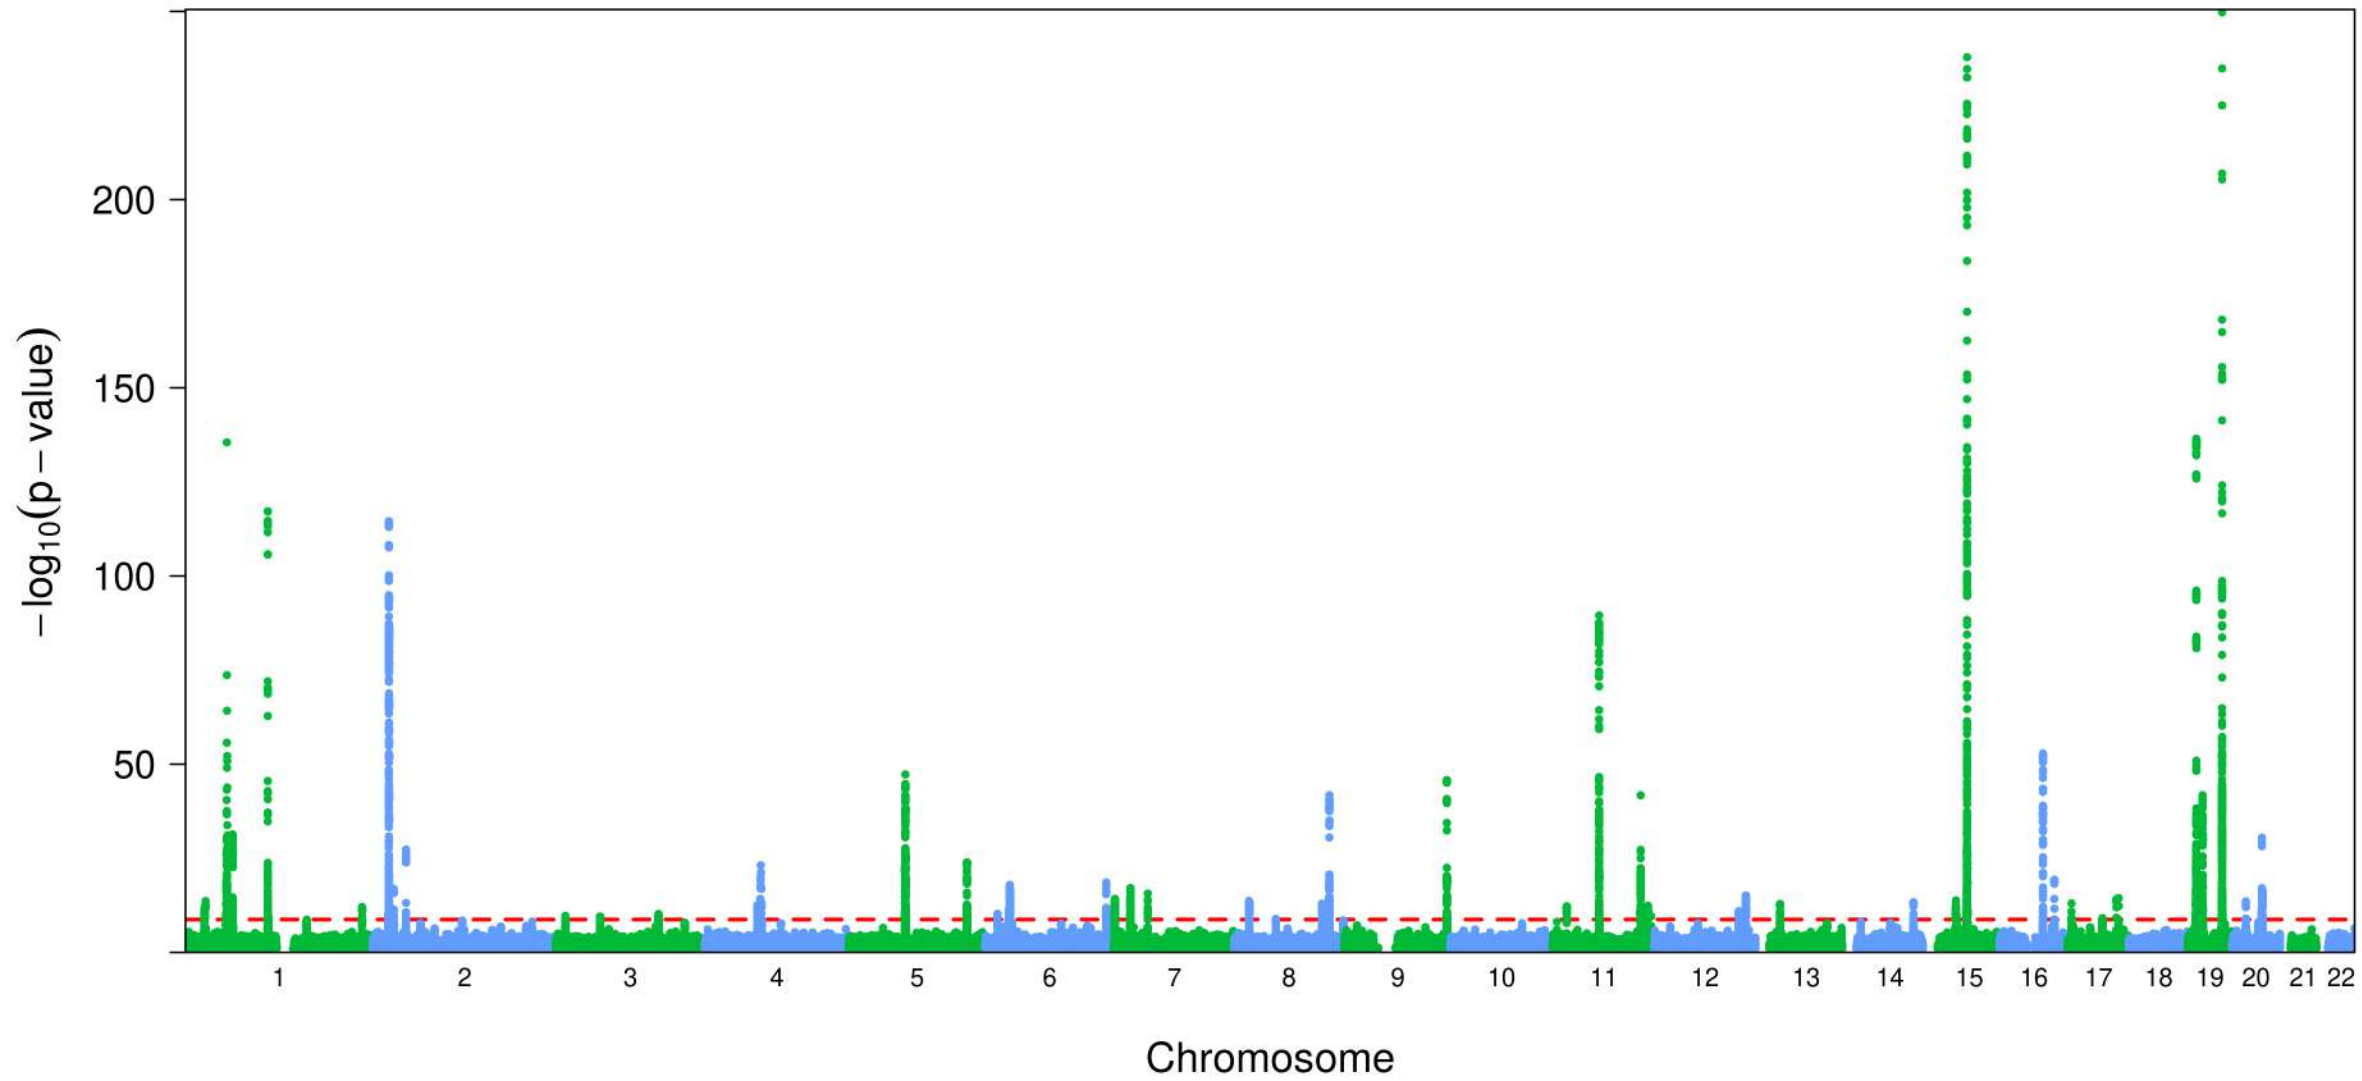

# XS-VLDL-FC\_percent

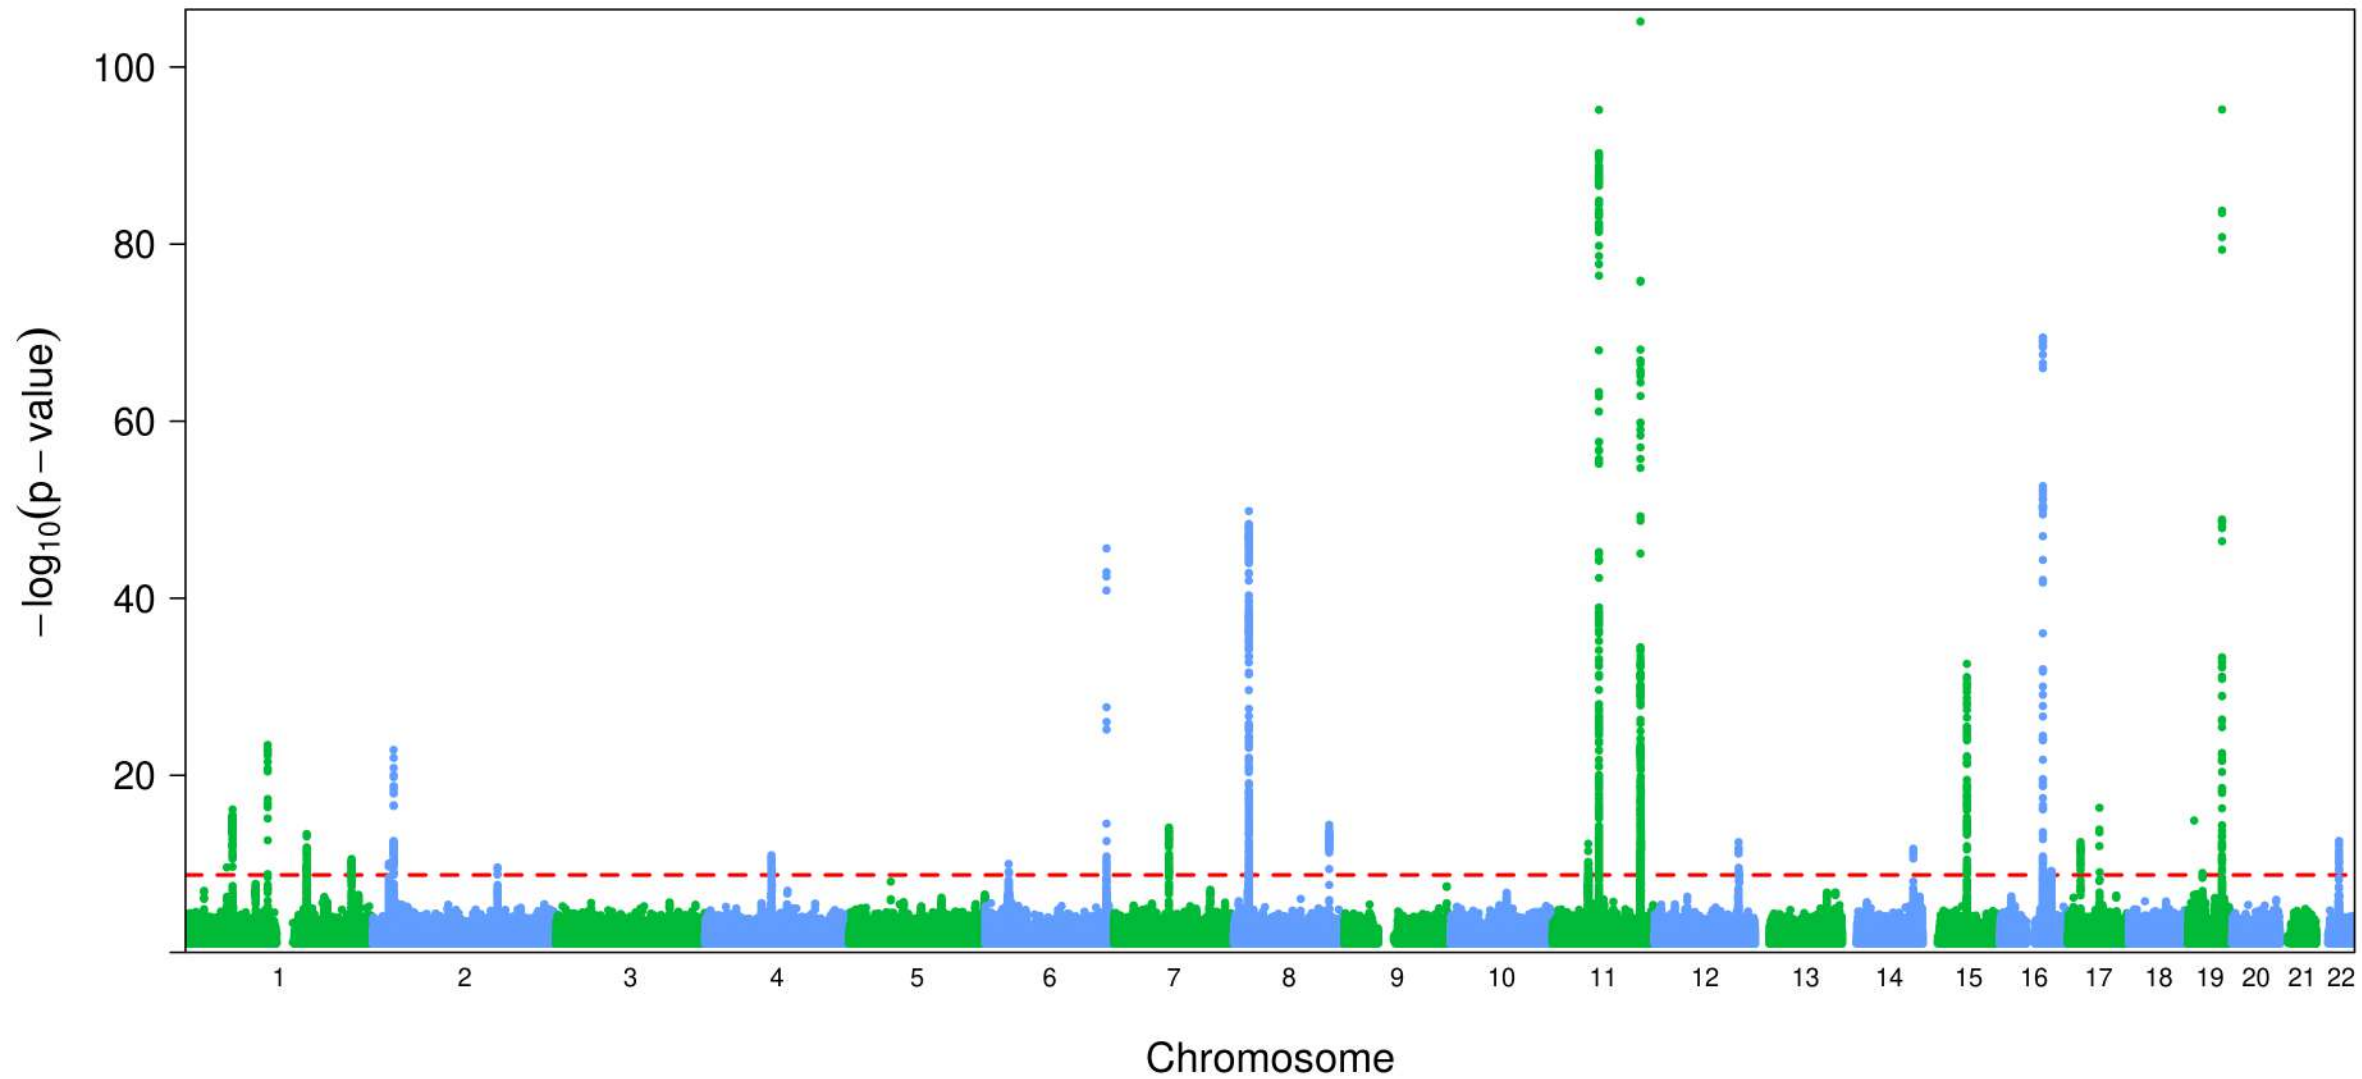

## XS-VLDL-L

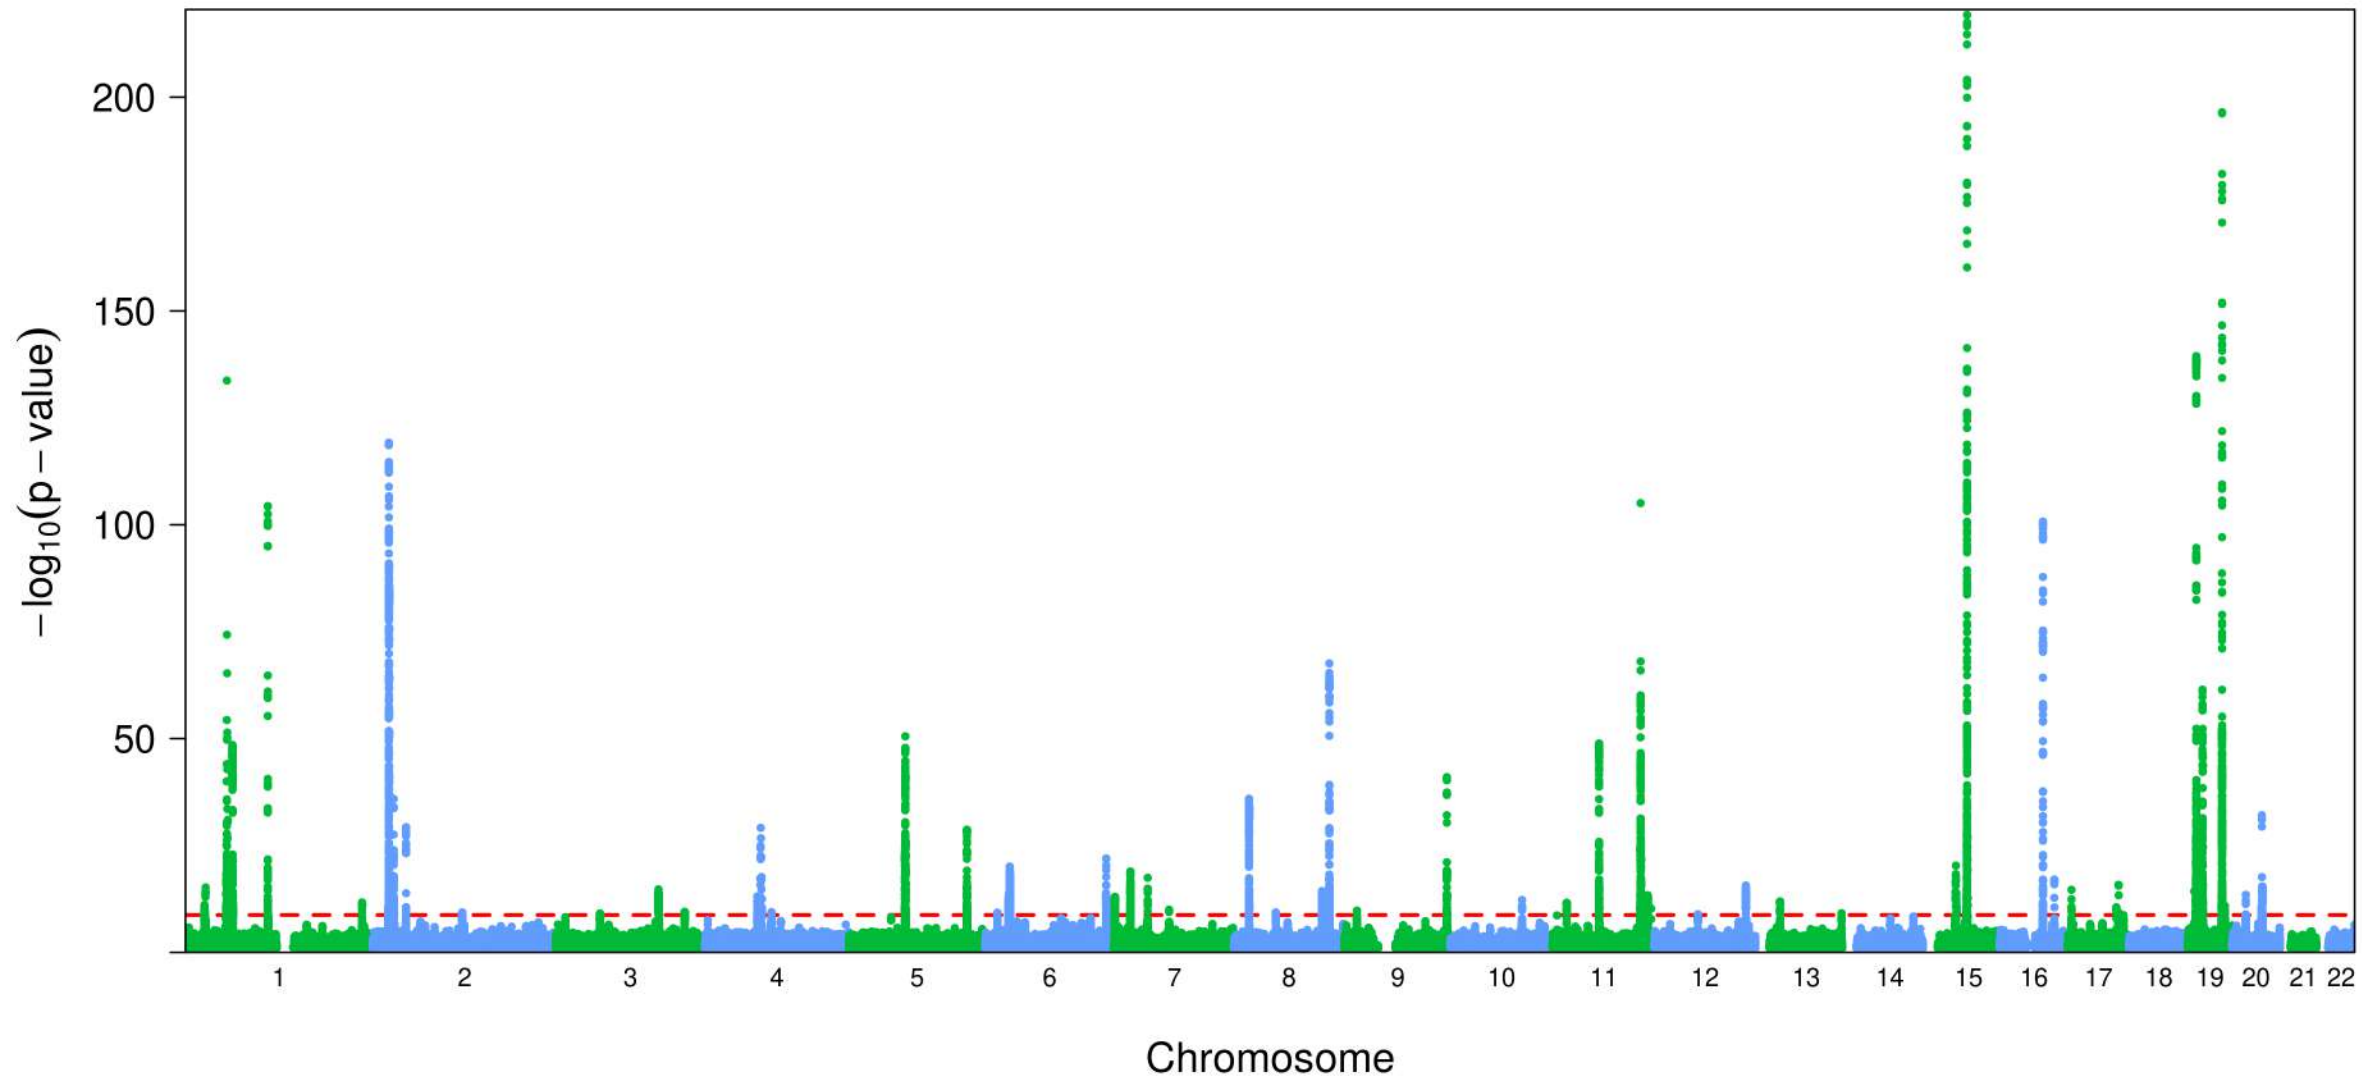



# XS-VLDL-P

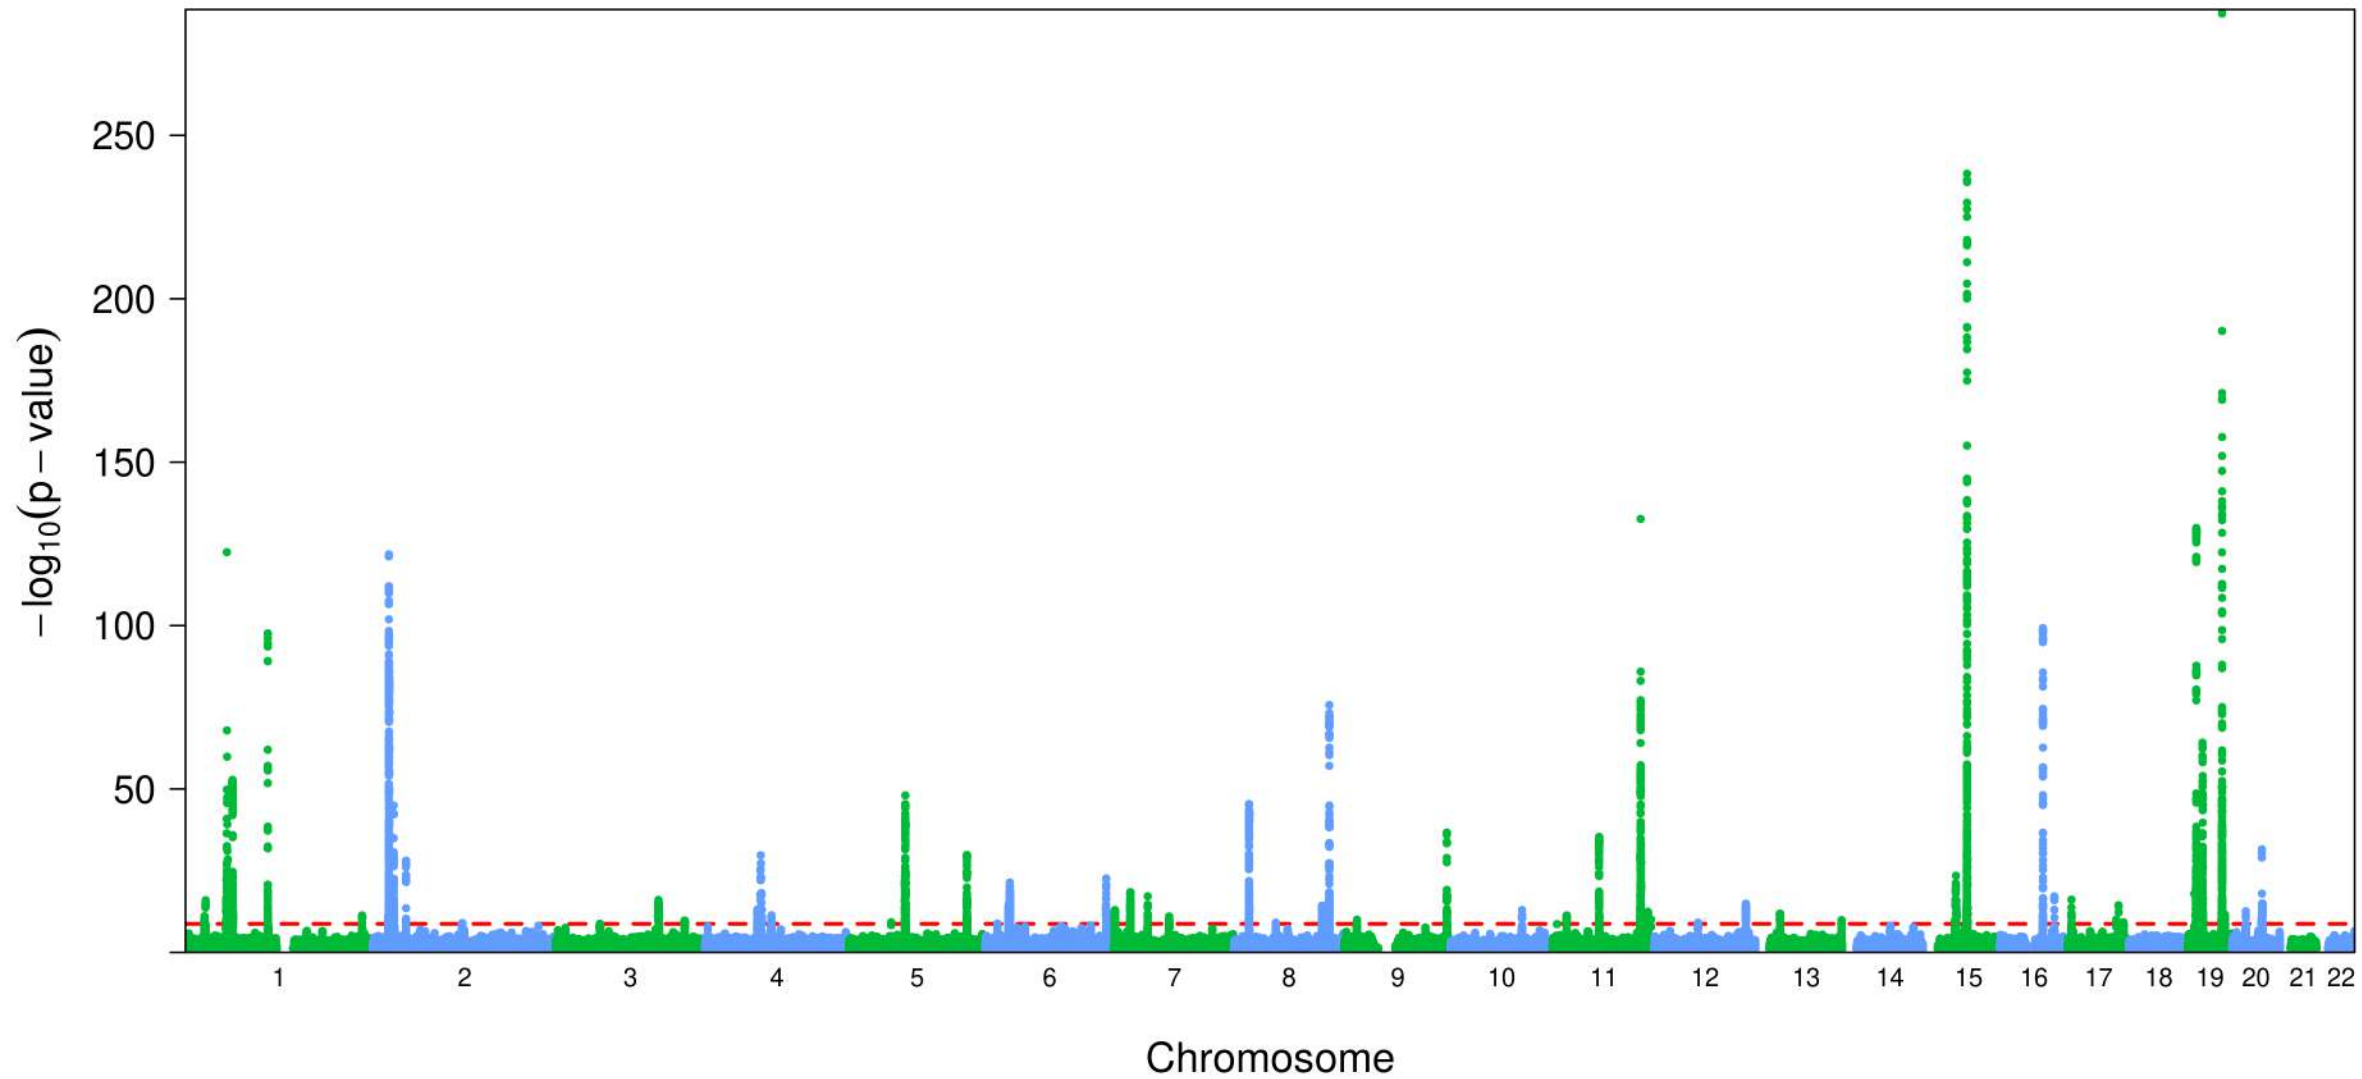

# XS-VLDL-PL

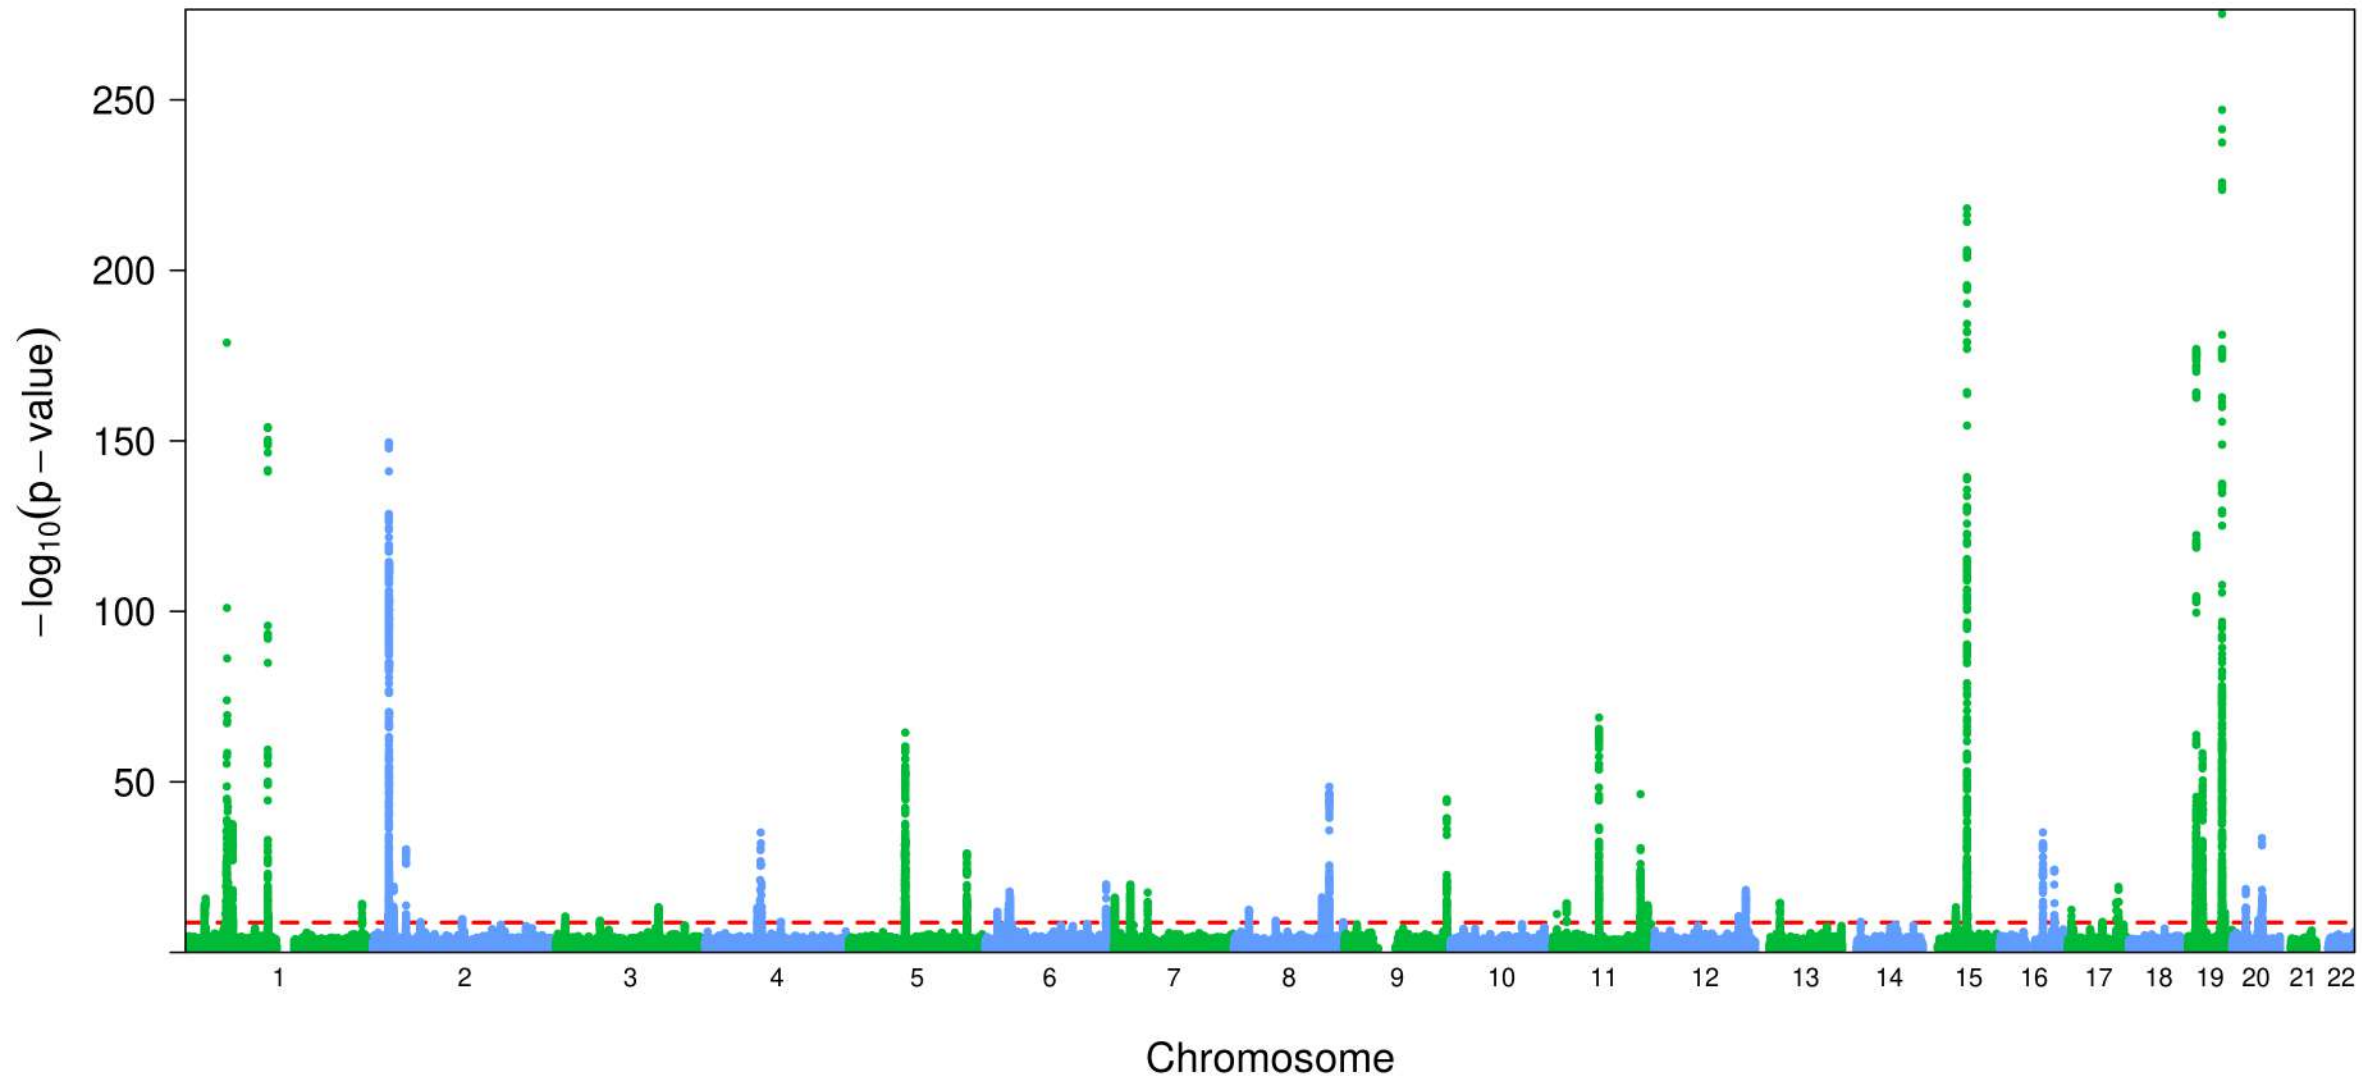

## XS-VLDL-PL\_percent

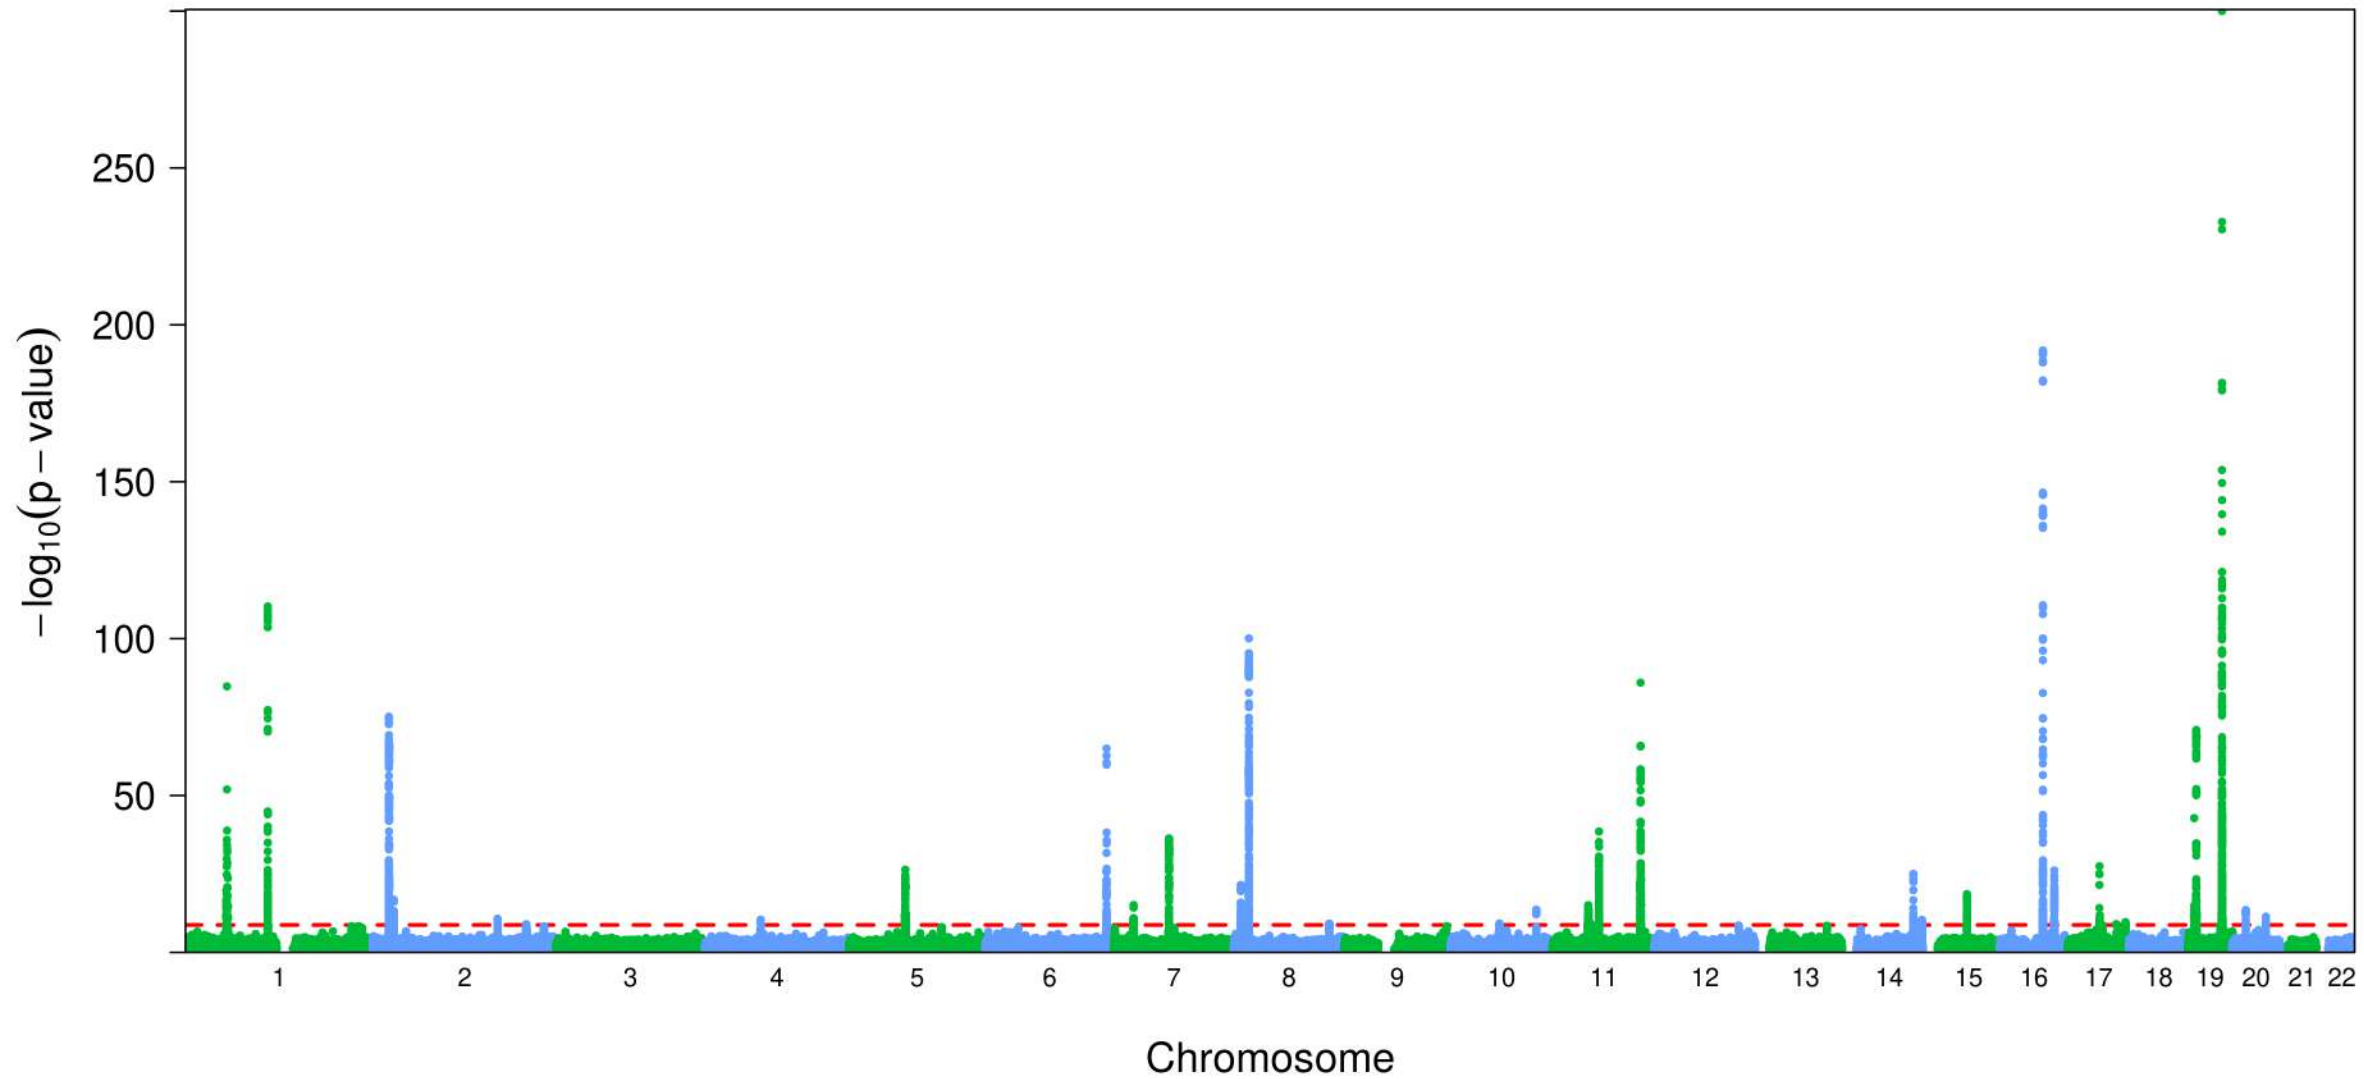

## XS-VLDL-TG

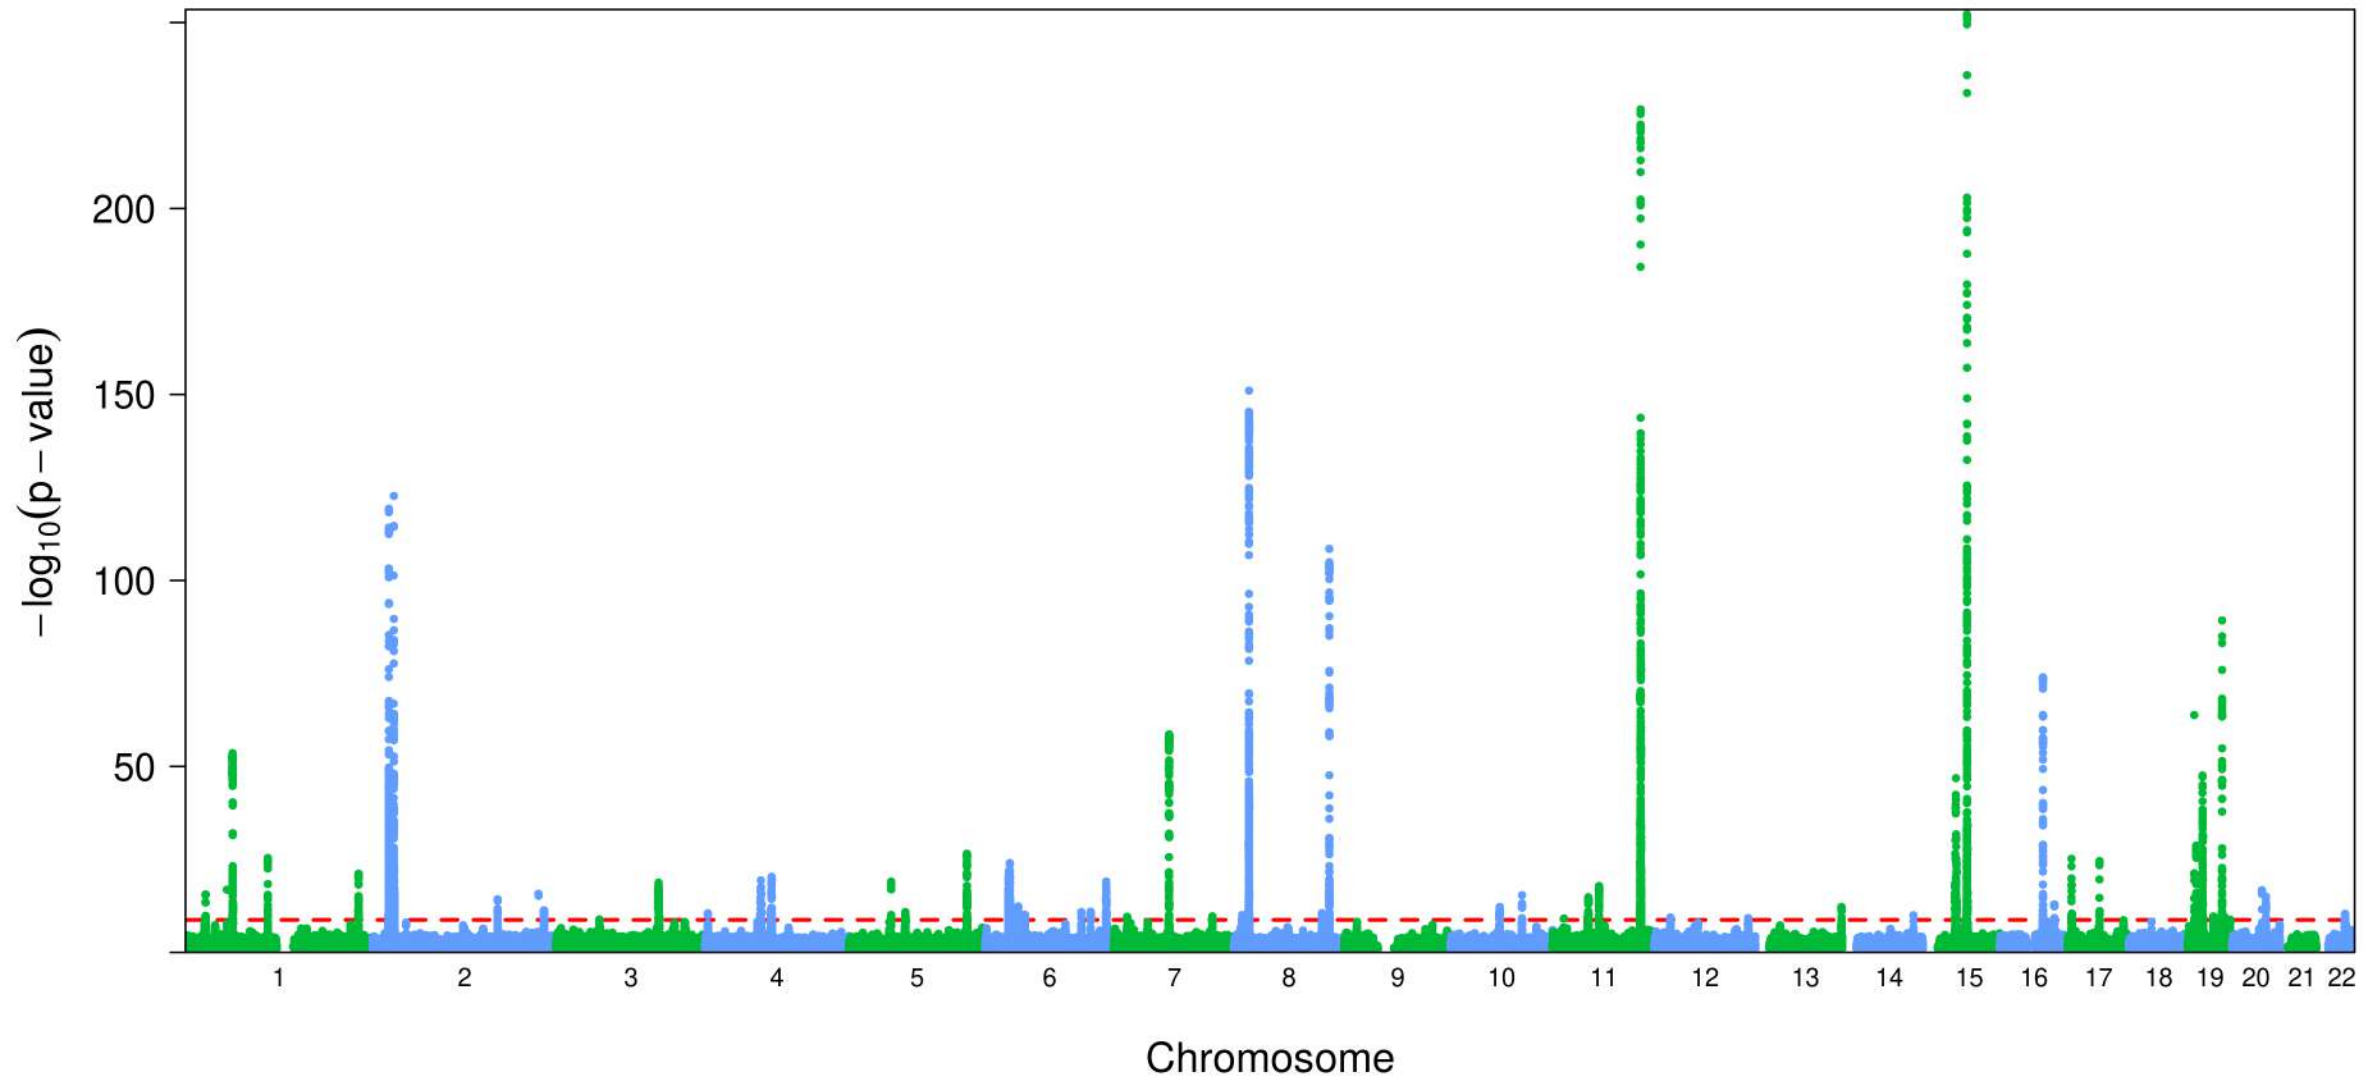

# XS-VLDL-TG\_percent

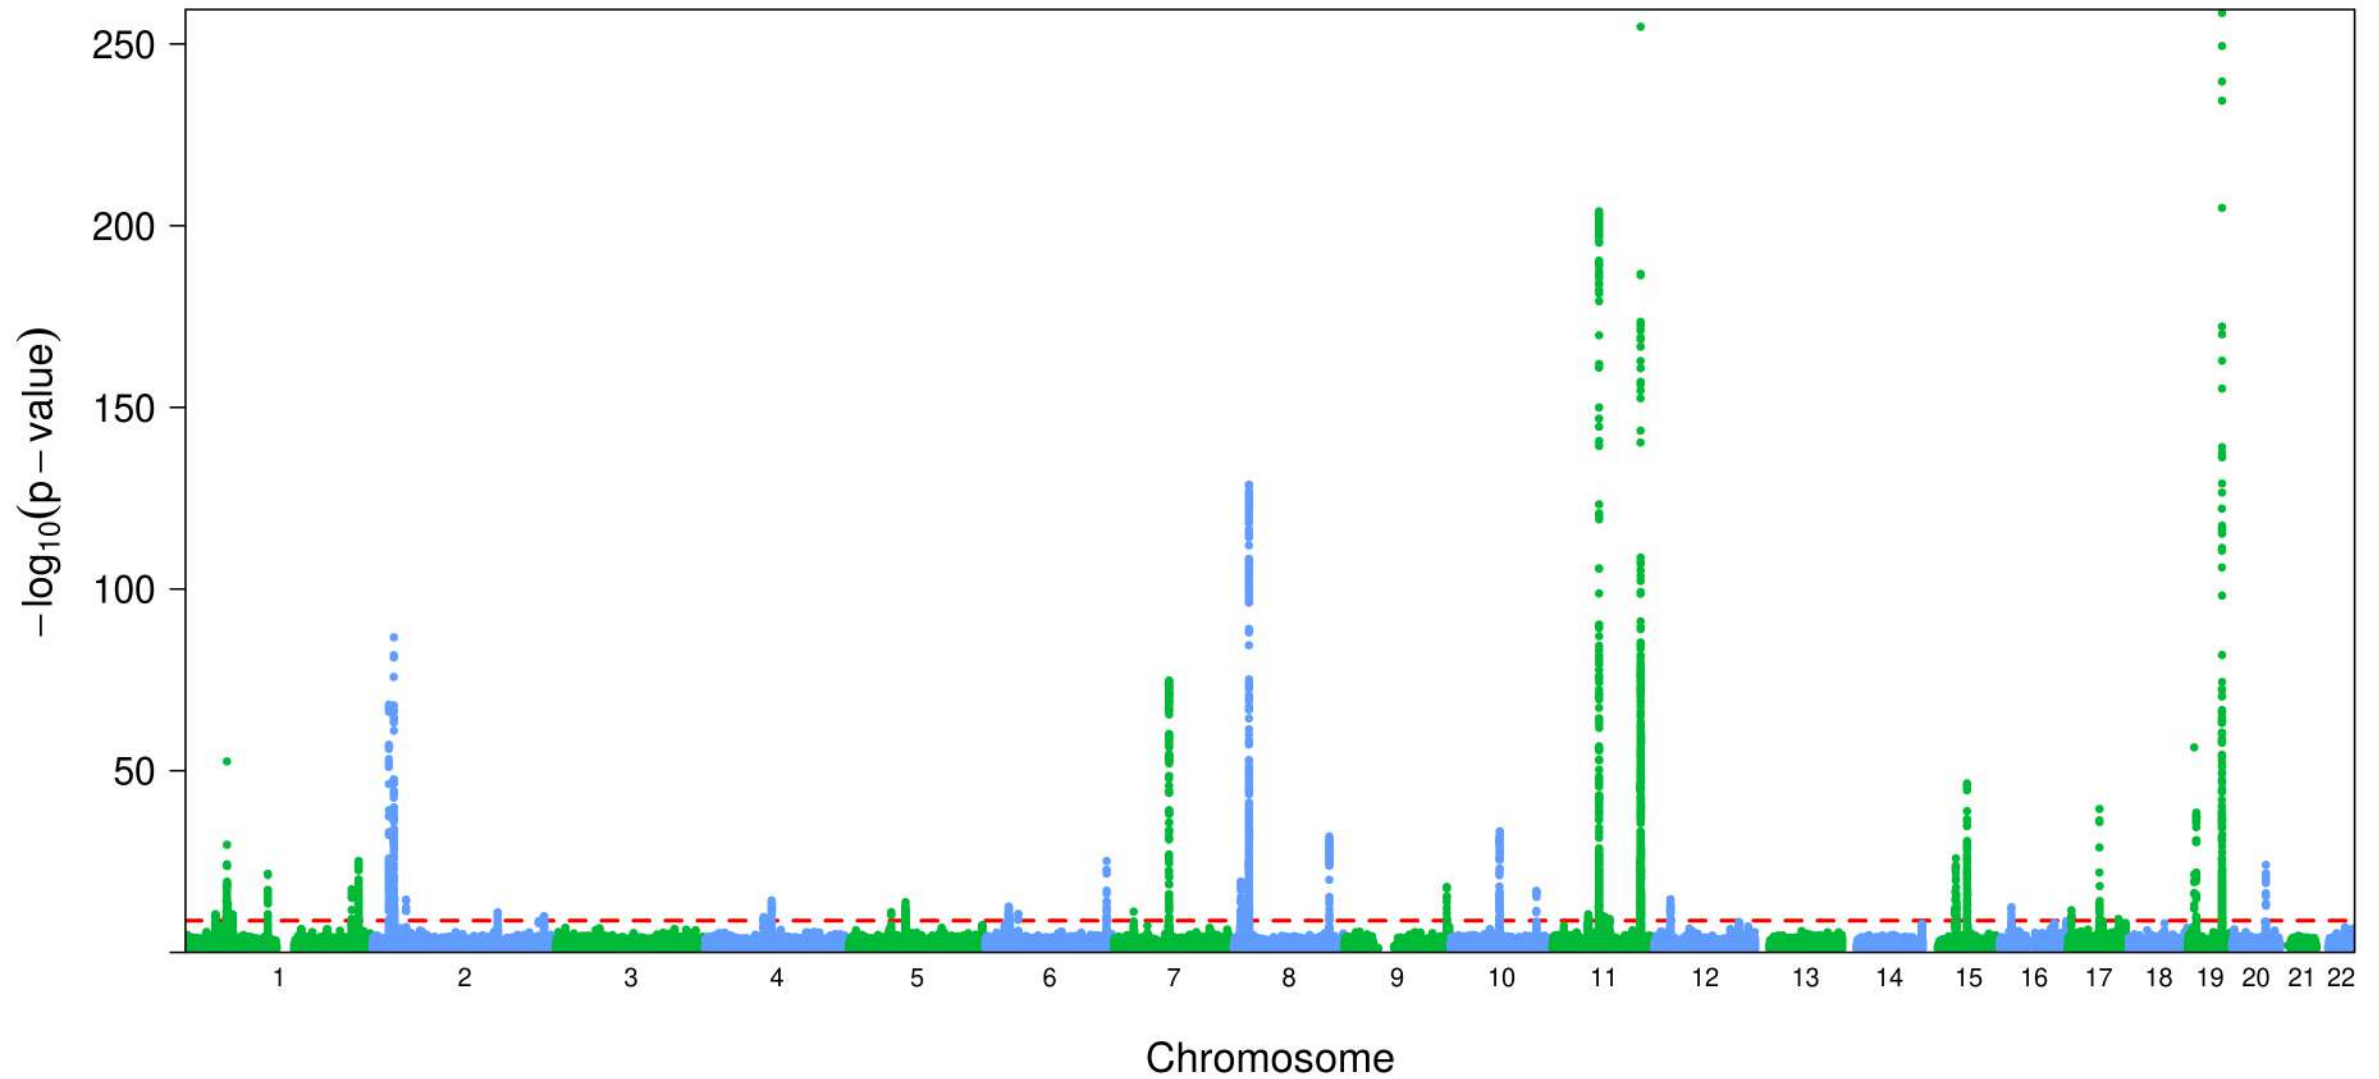

# XXL-VLDL-C

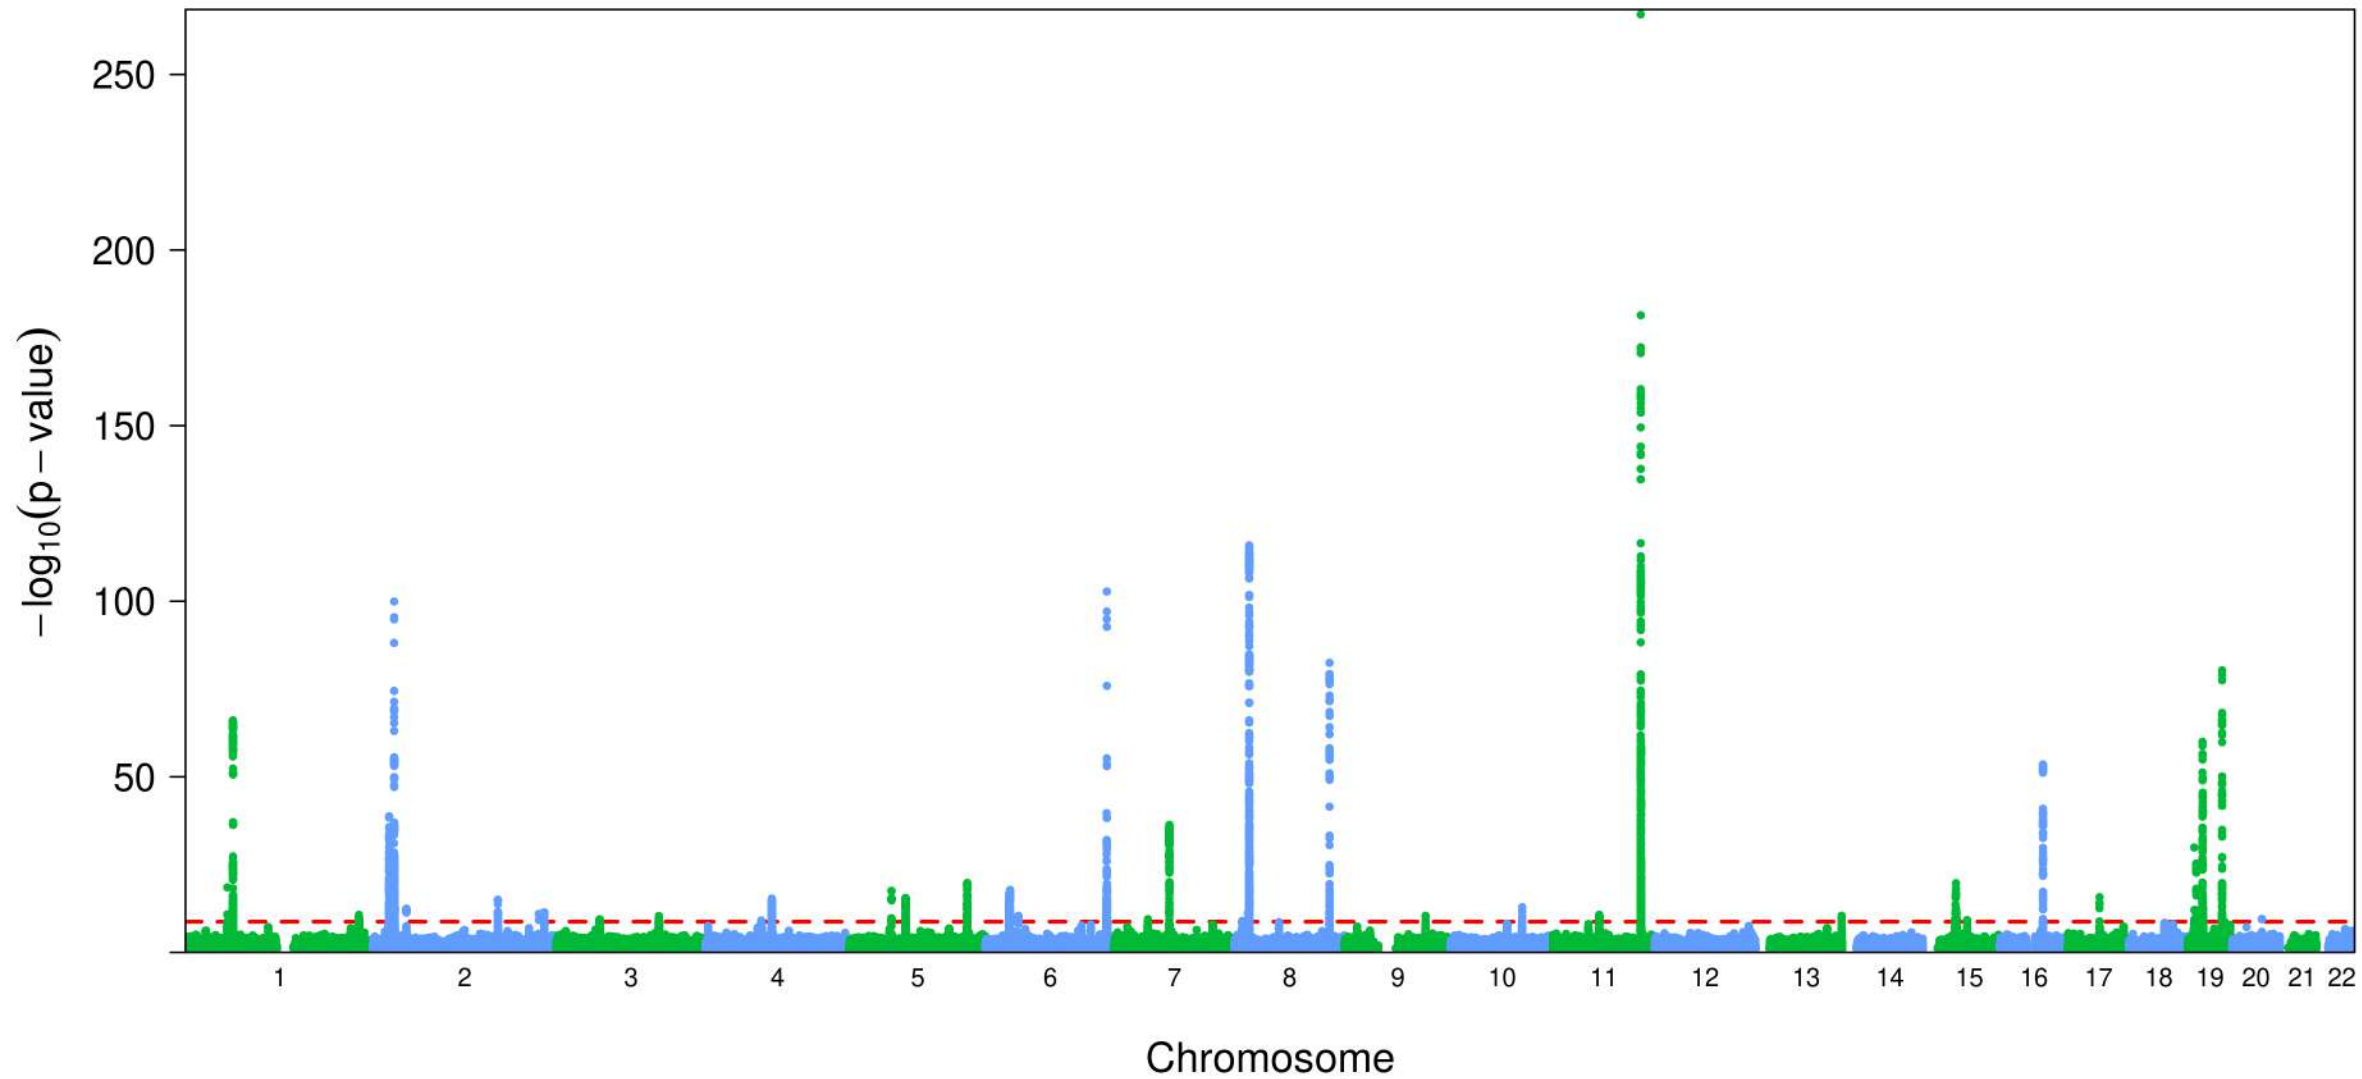

# XXL-VLDL-C\_percent

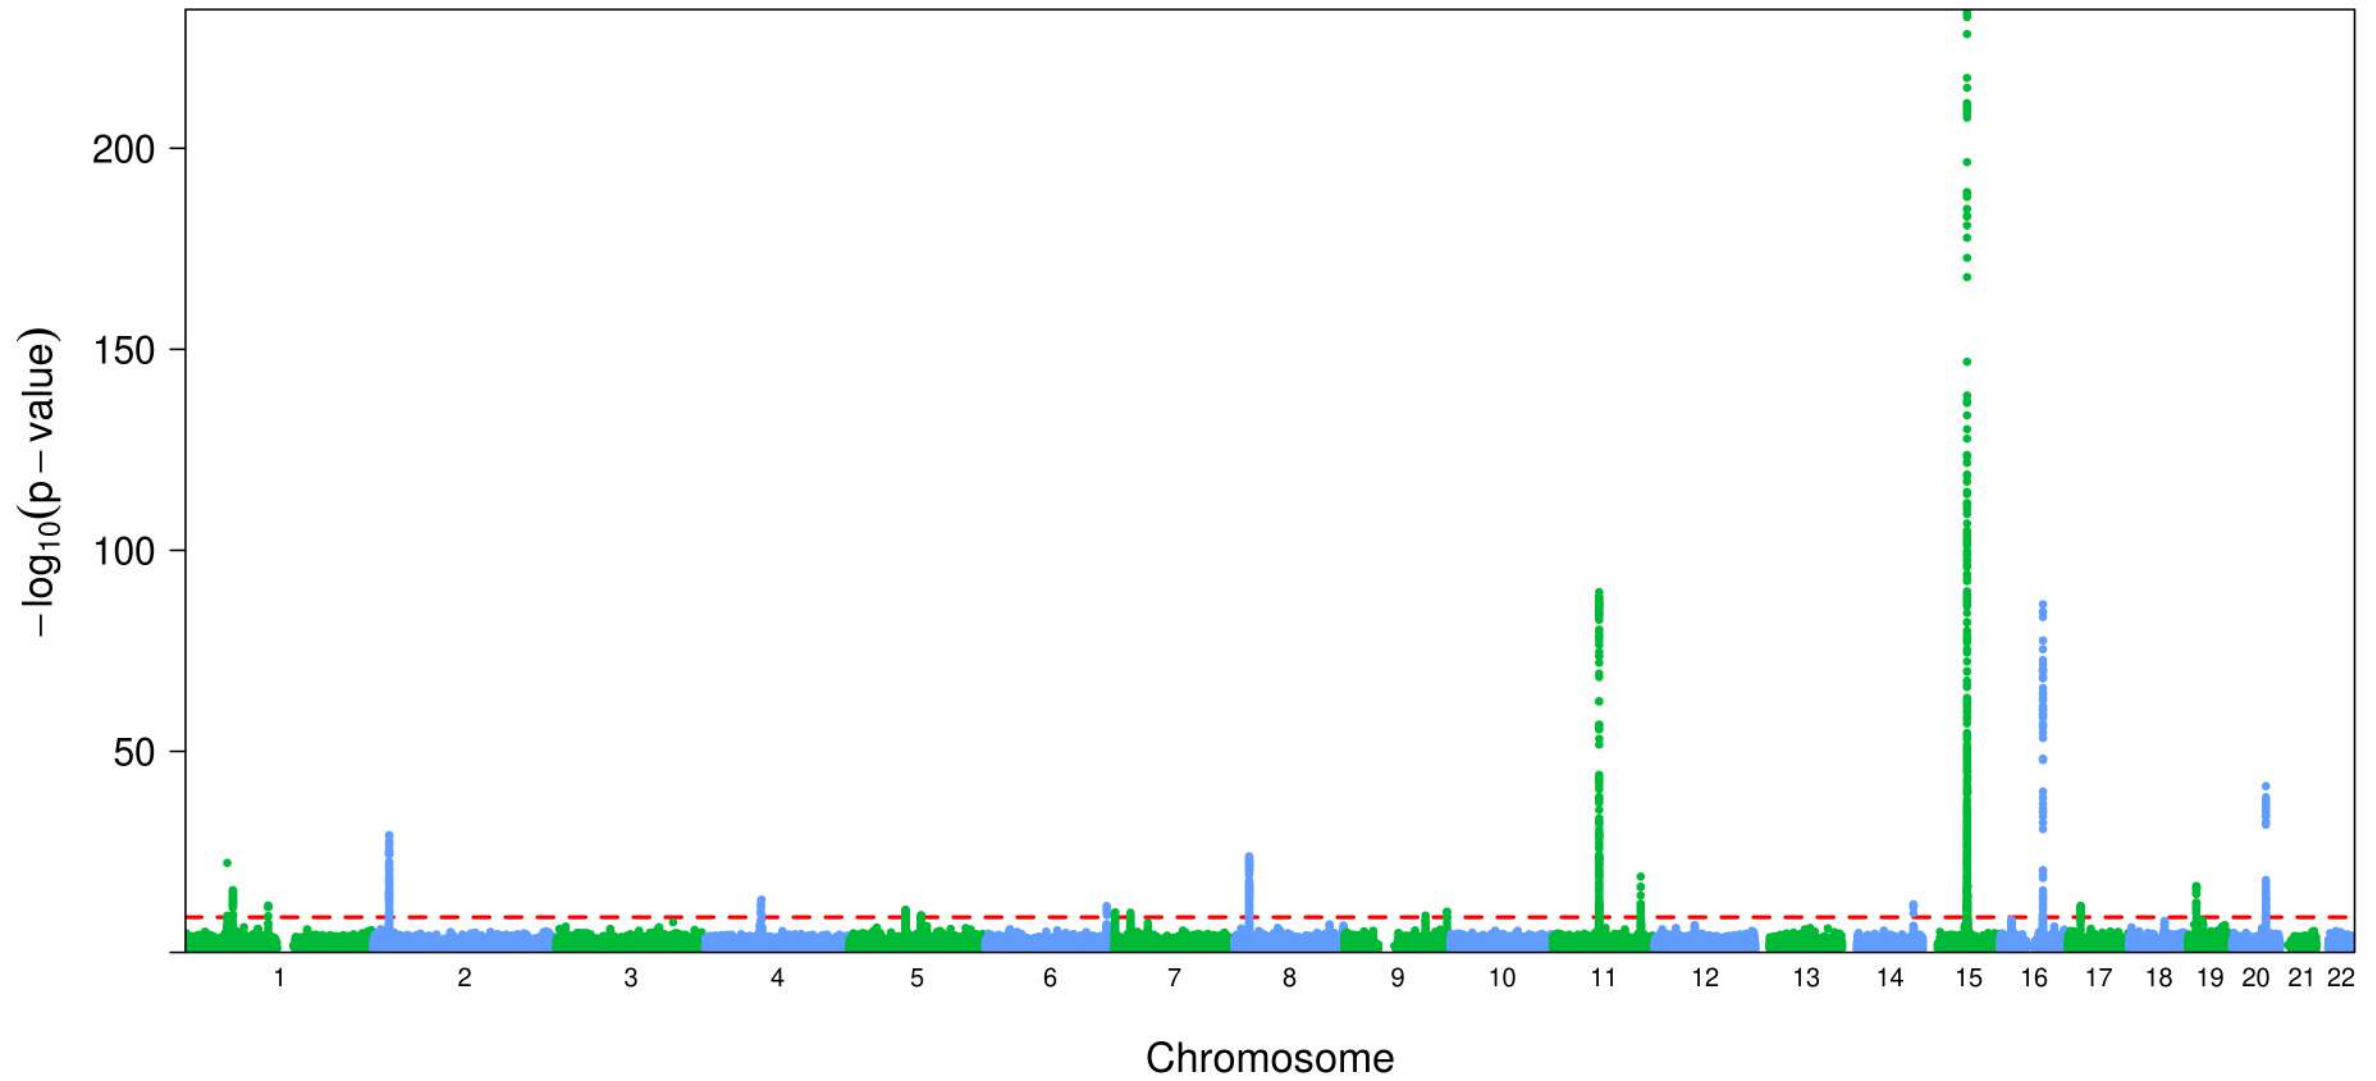

# XXL-VLDL-CE

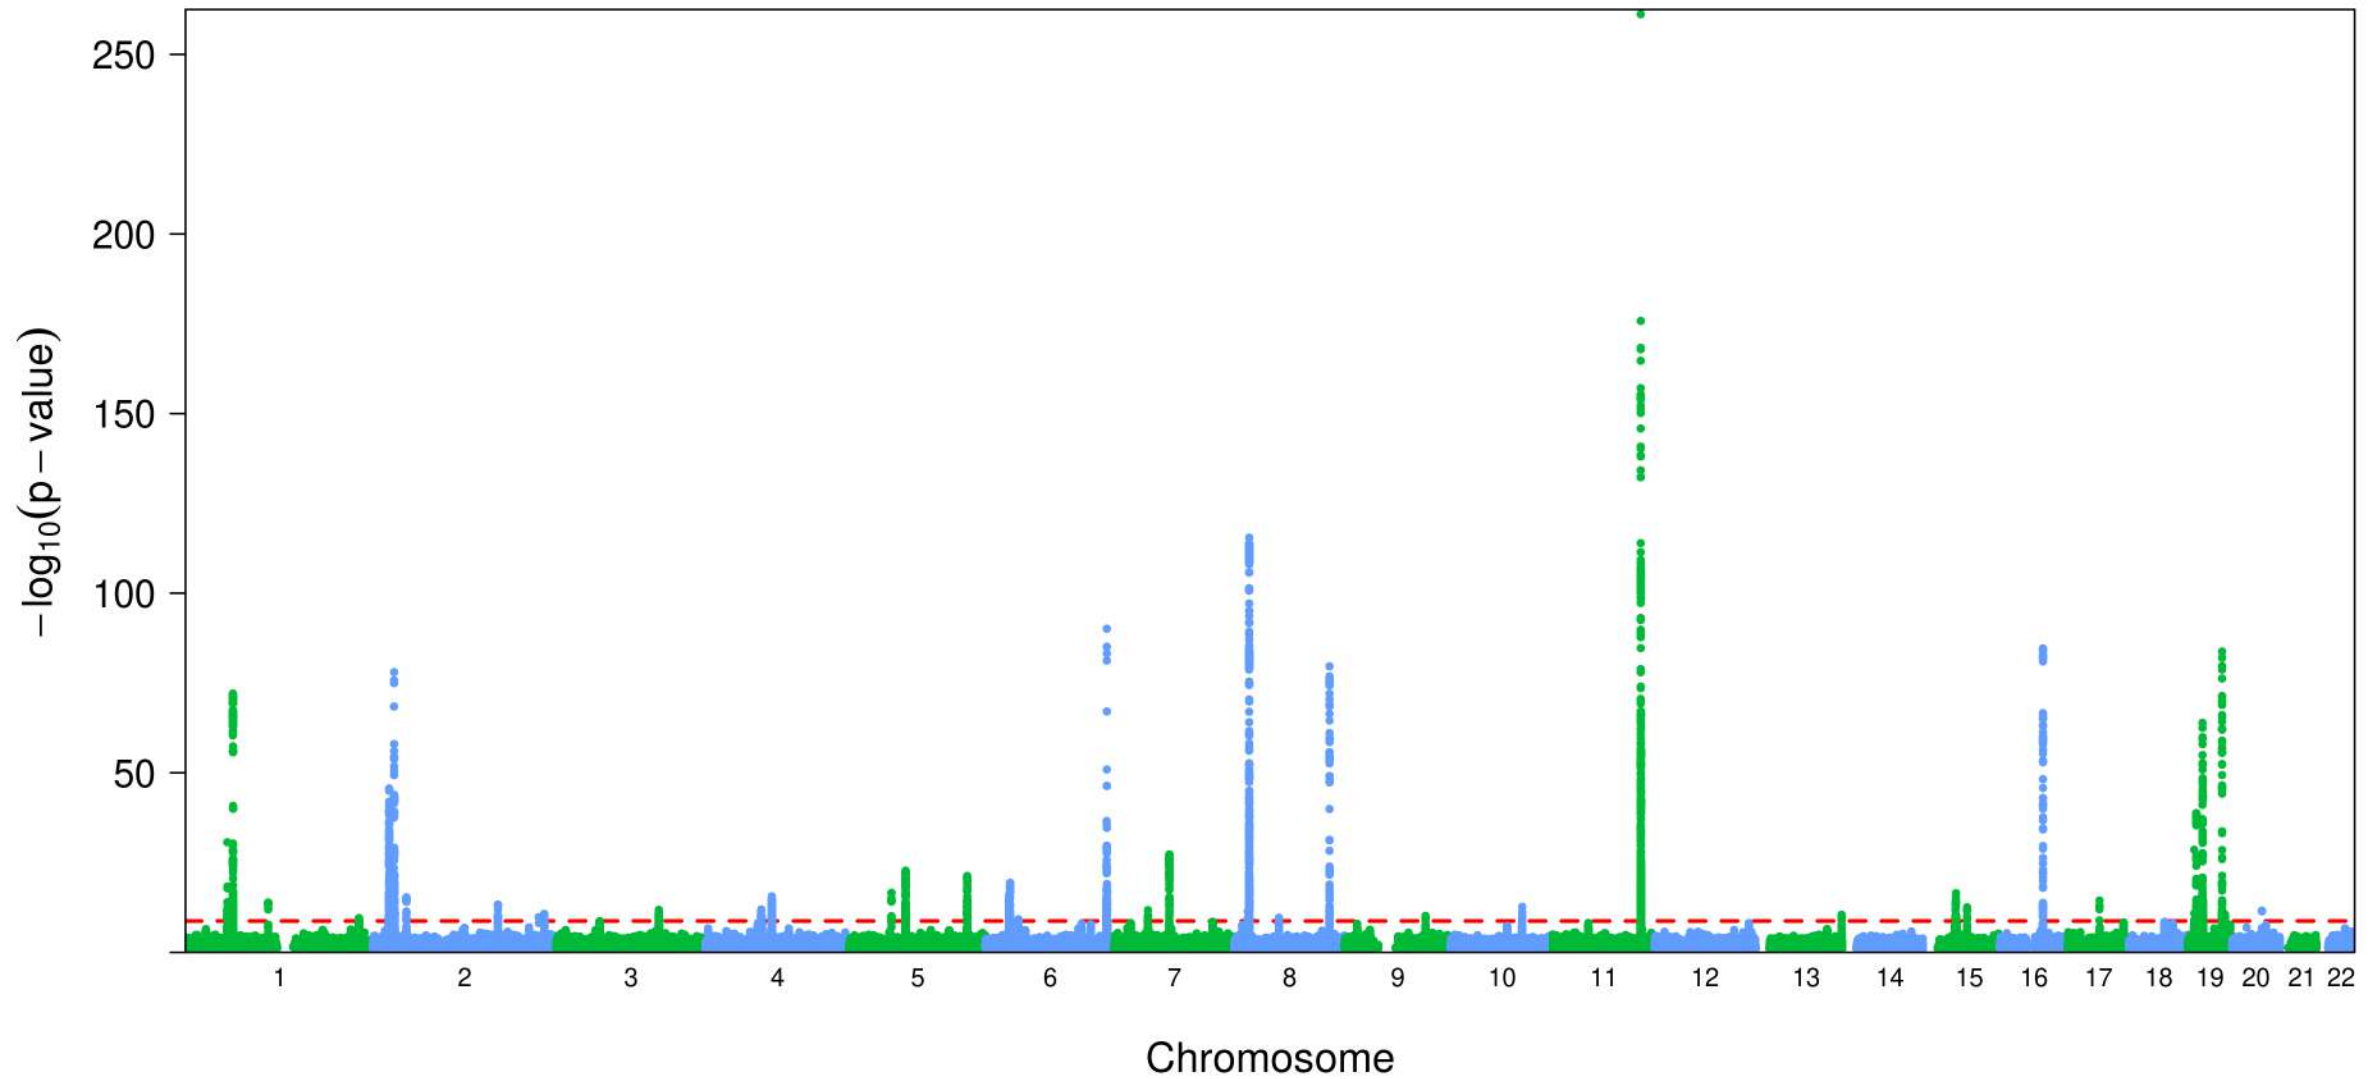



# XXL-VLDL-CE\_percent

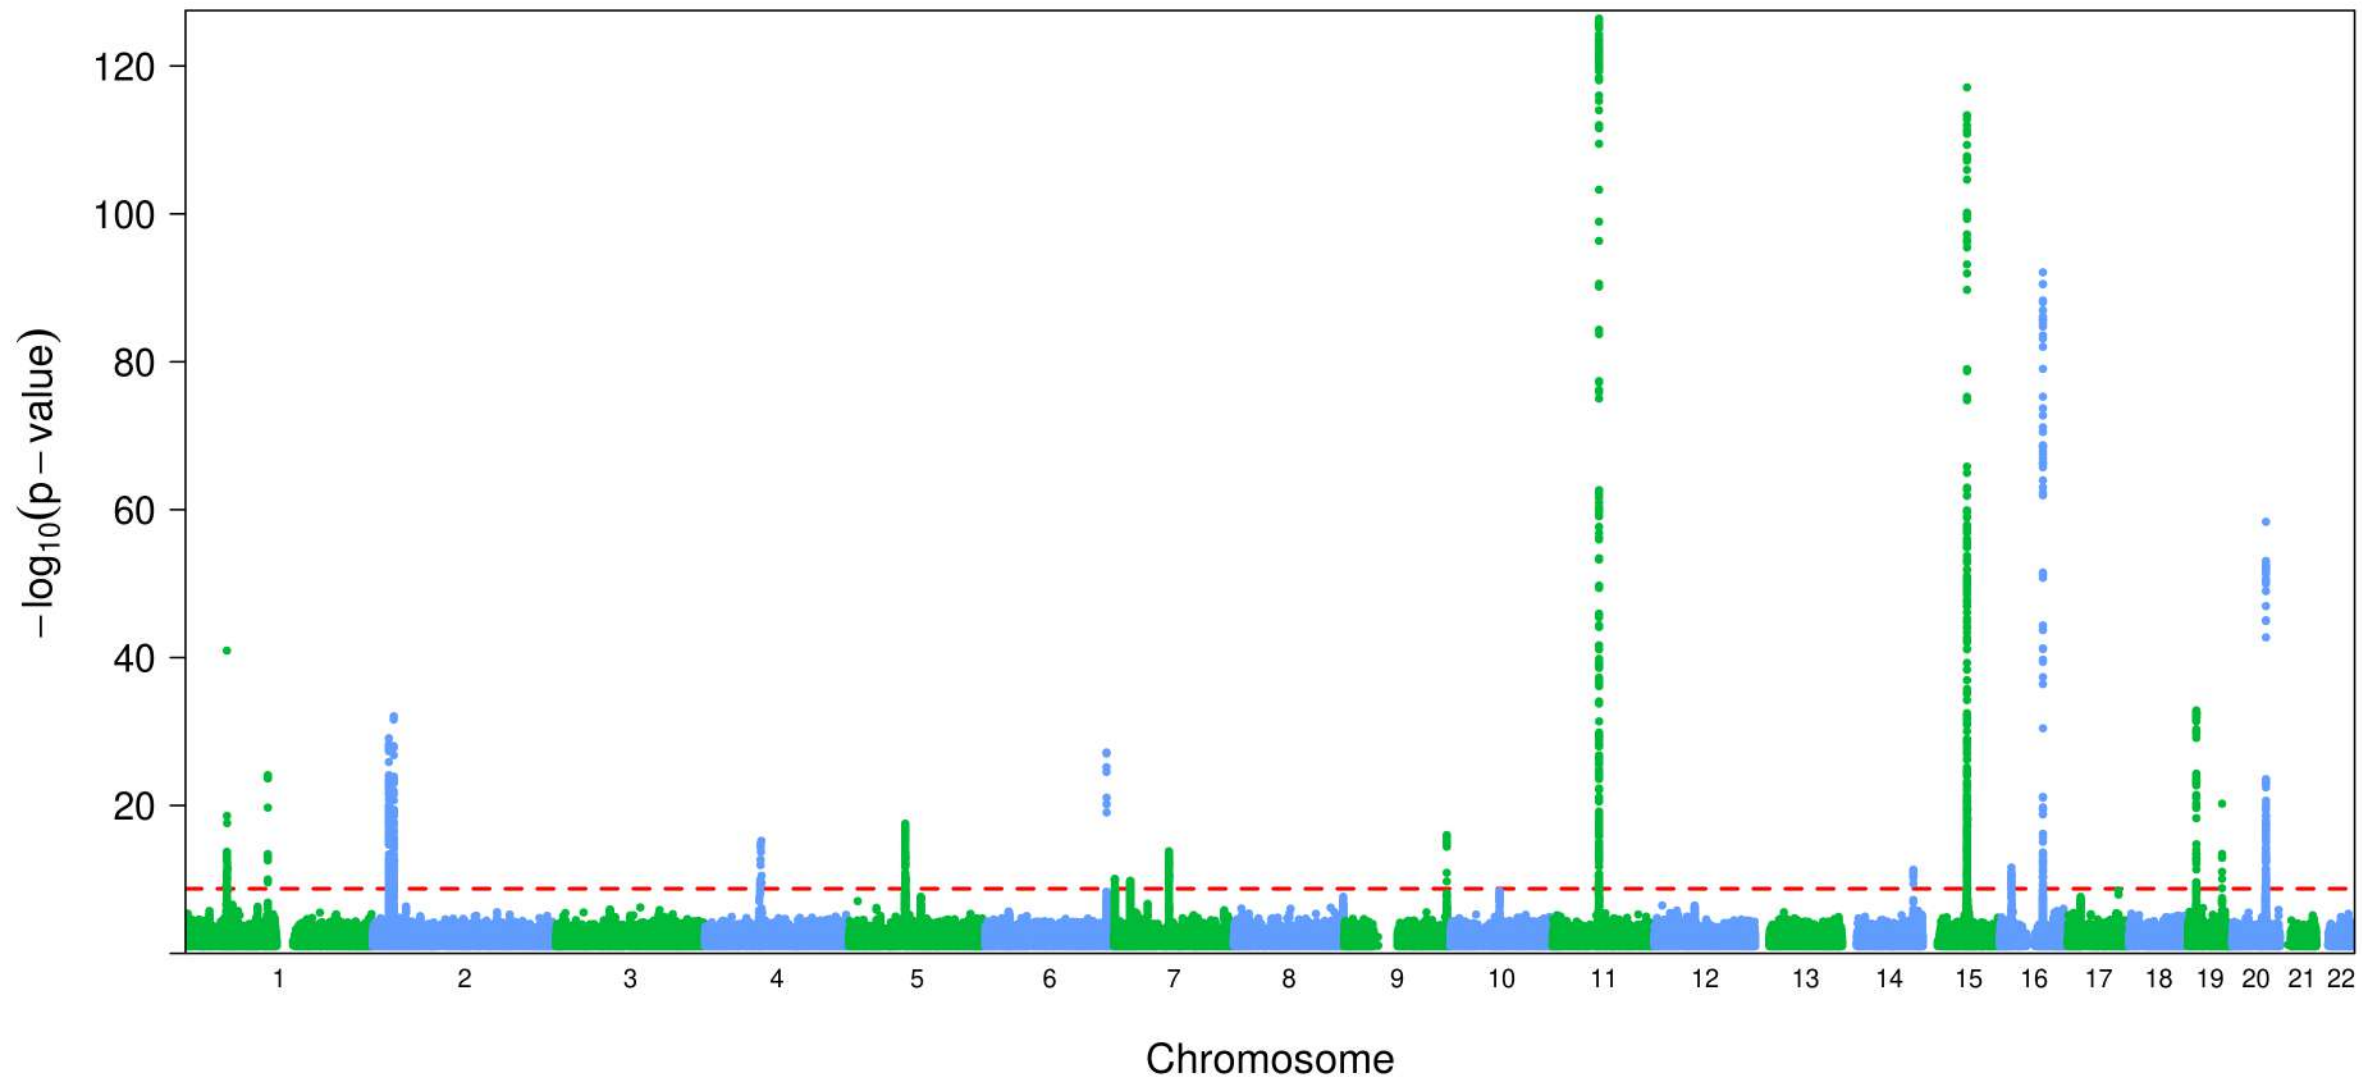

# XXL-VLDL-FC

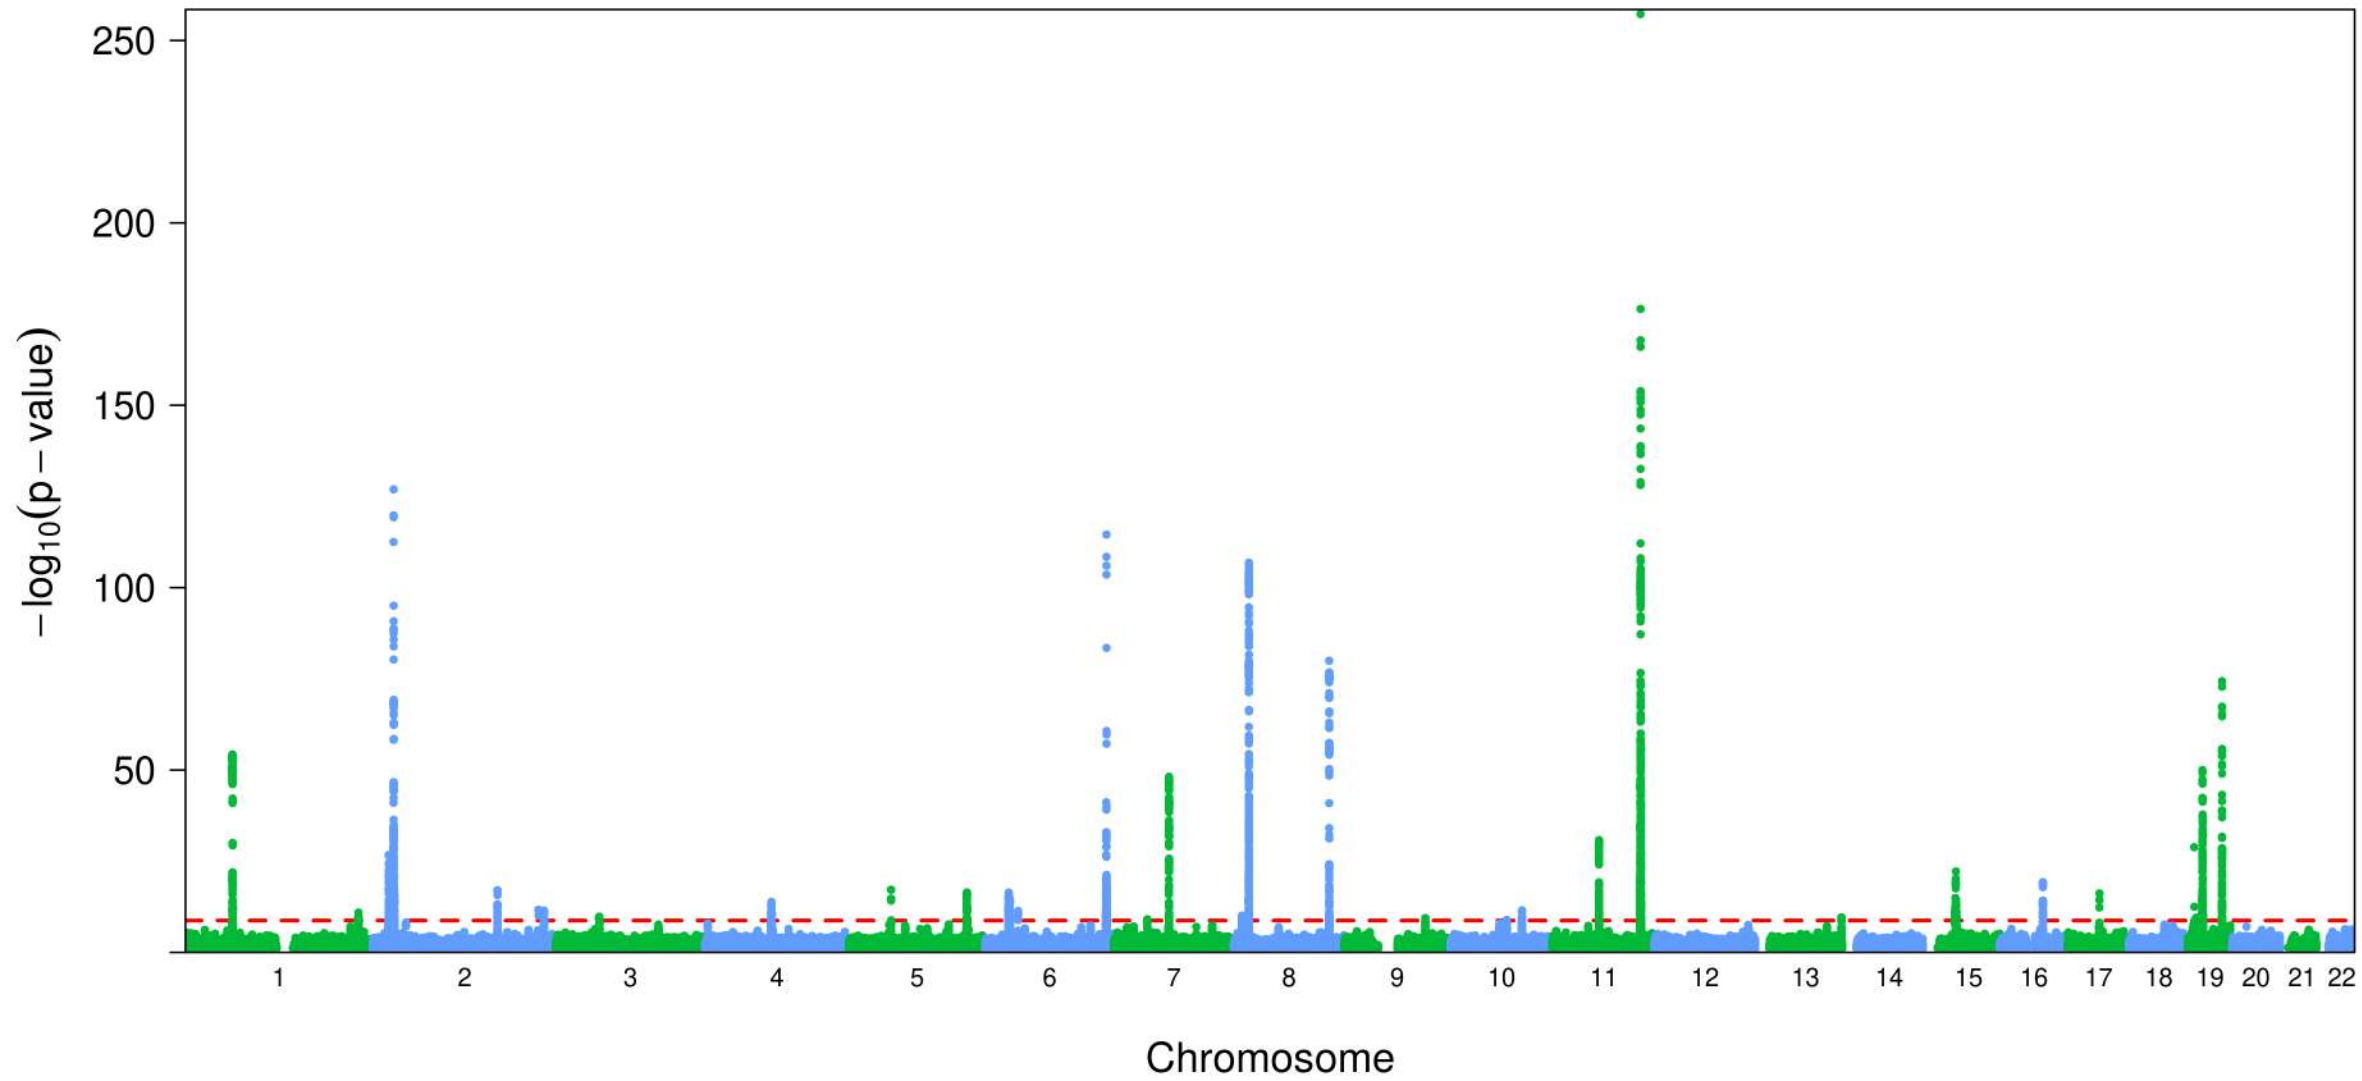

# XXL-VLDDL-FC\_percent

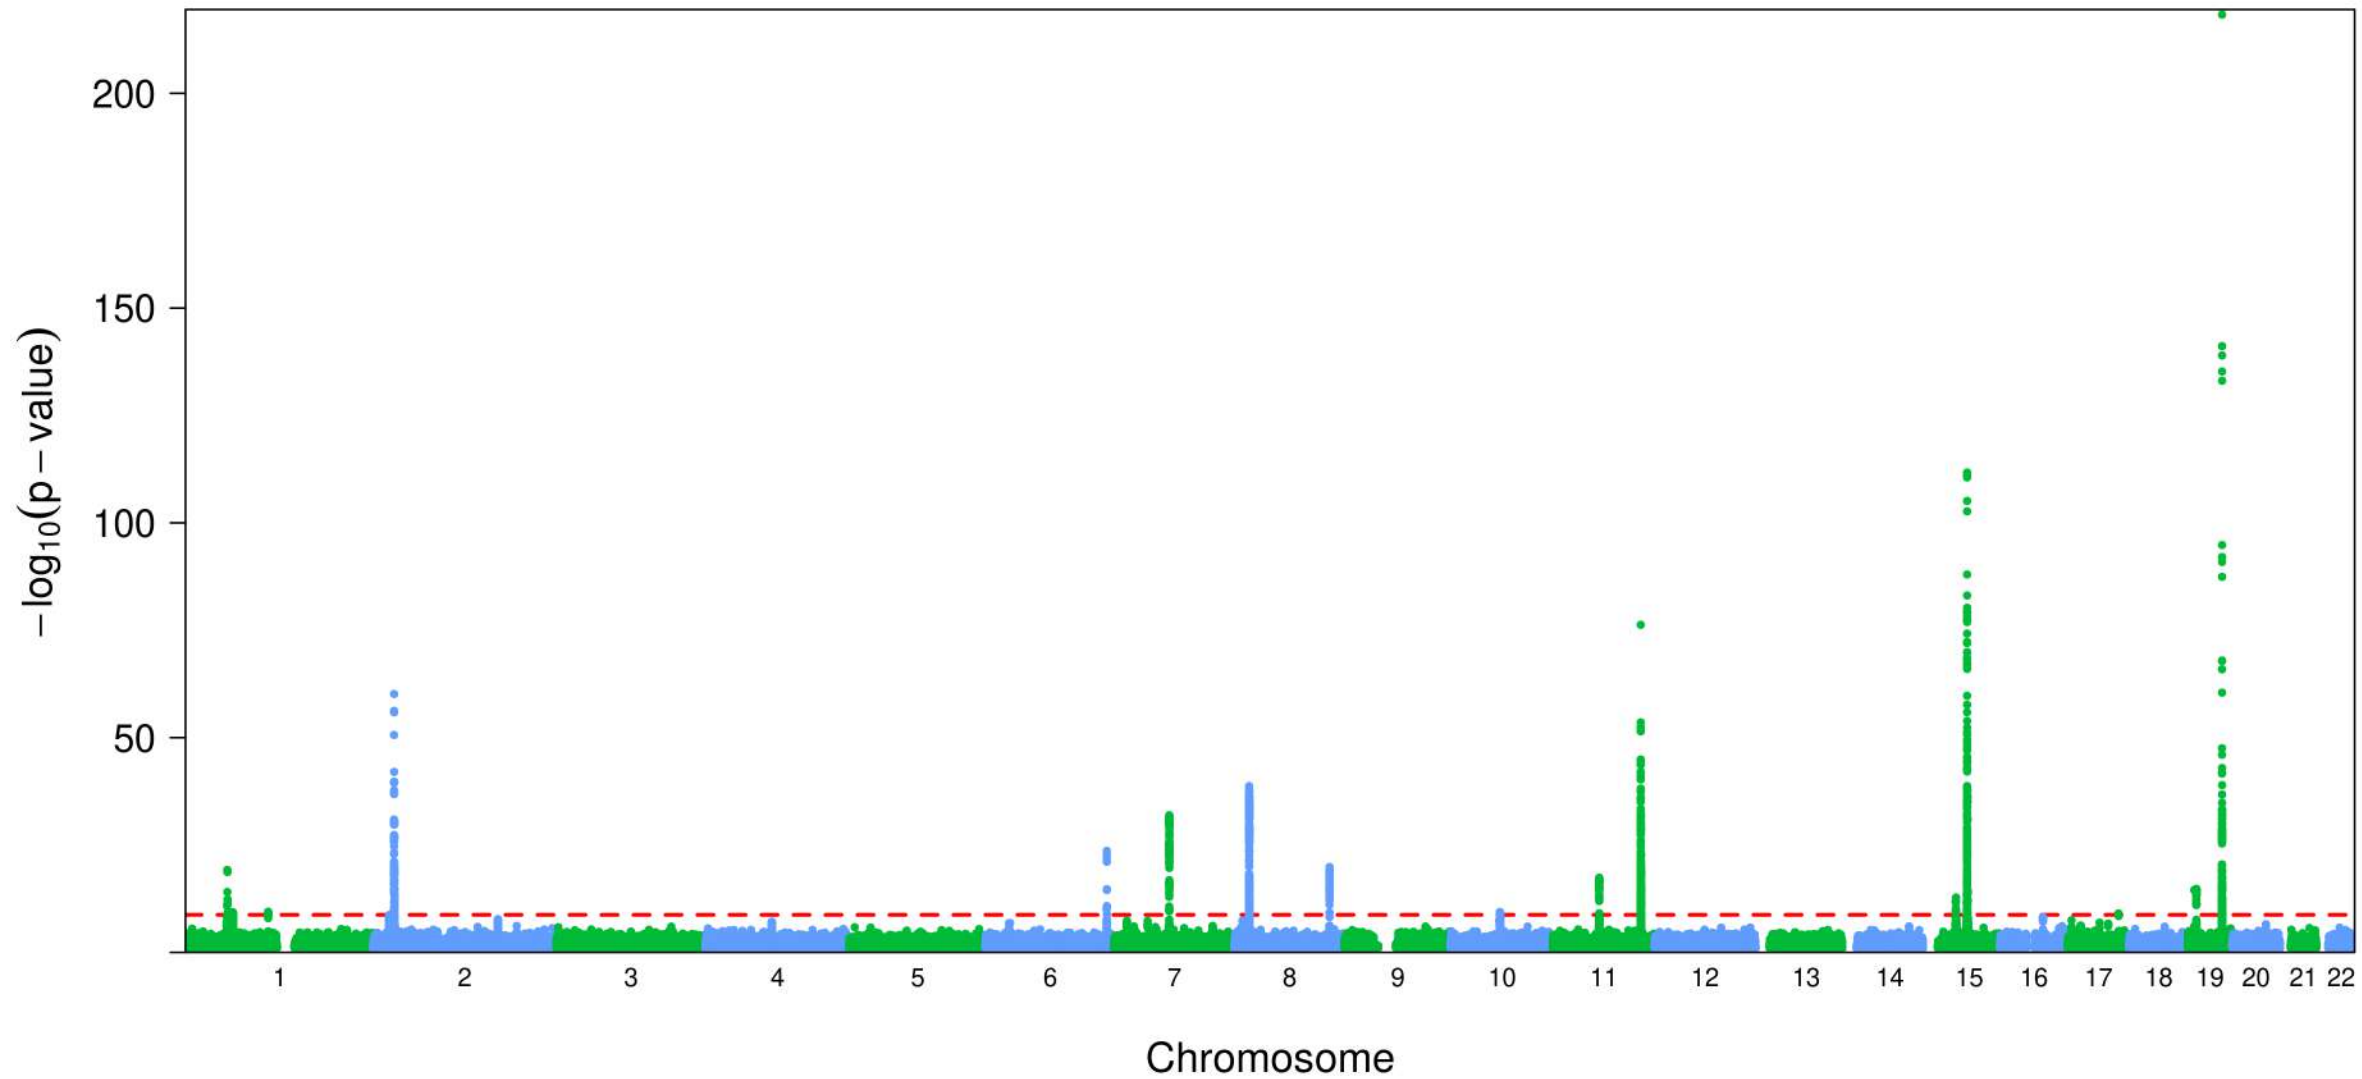

# XXL-VLDL-L

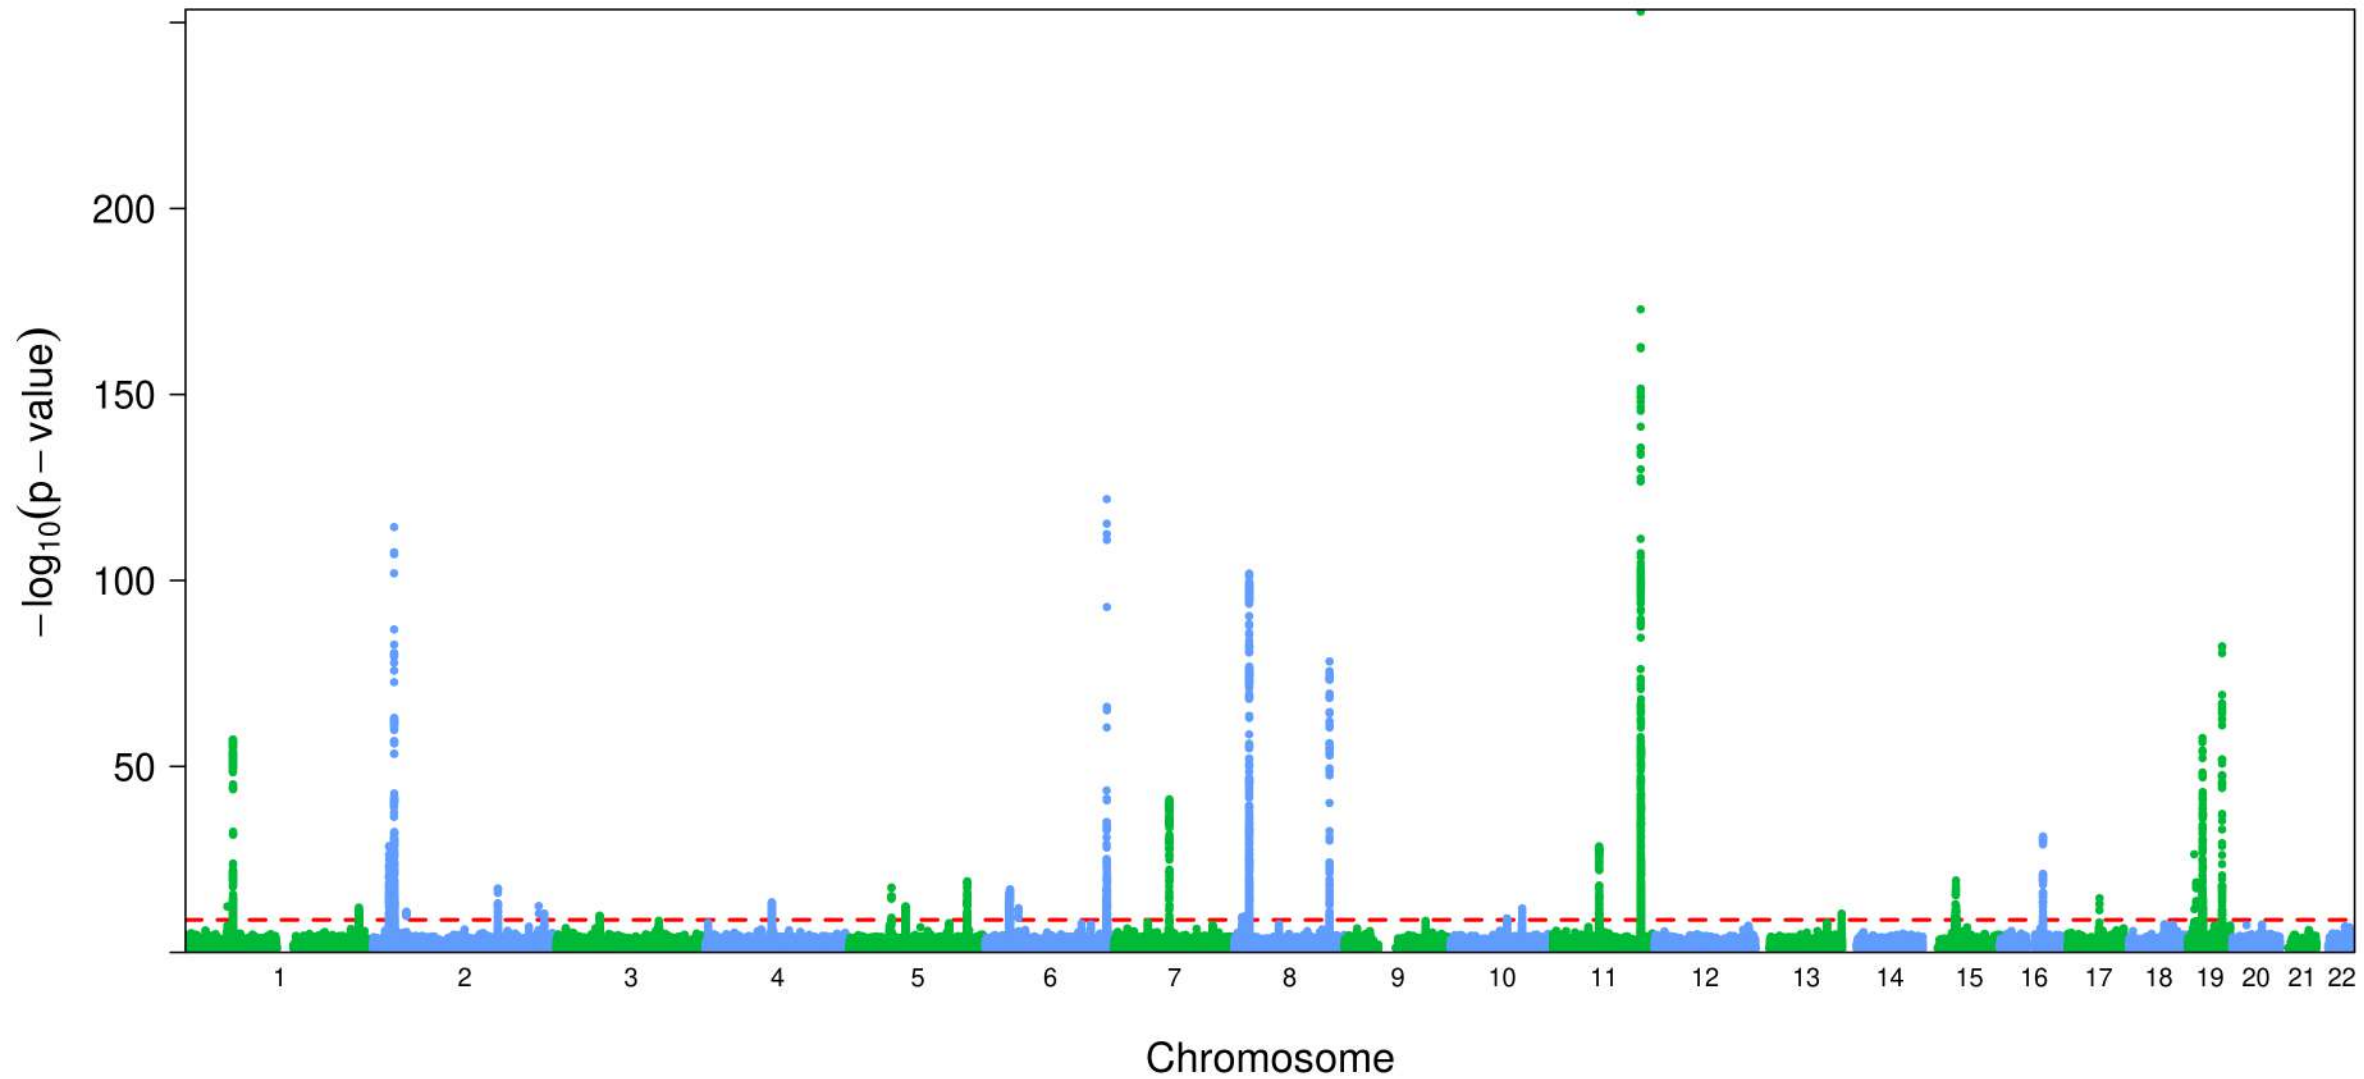

# XXL-VLDL-P

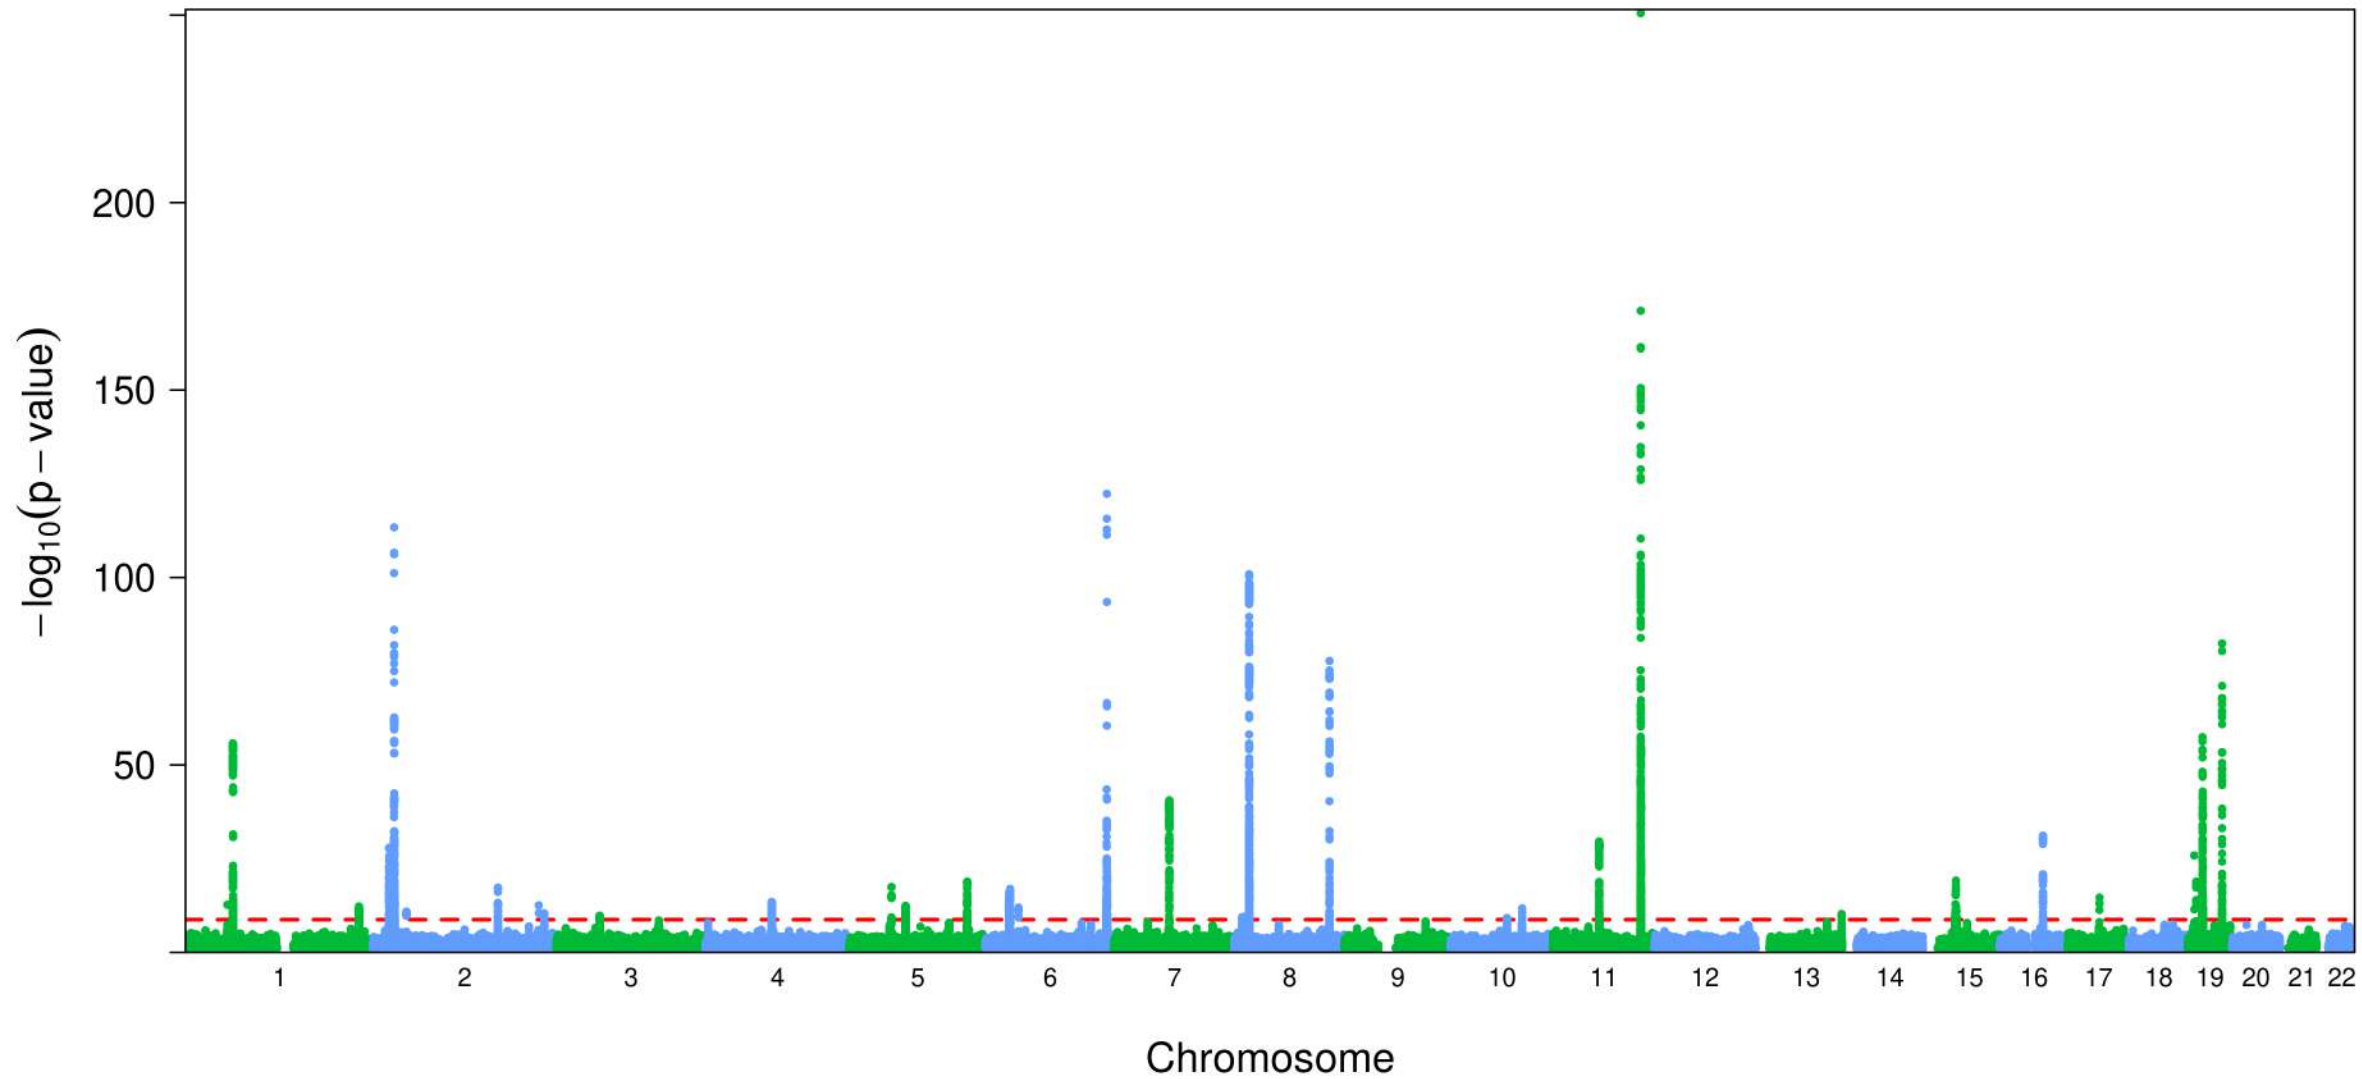

# XXL-VLDL-PL

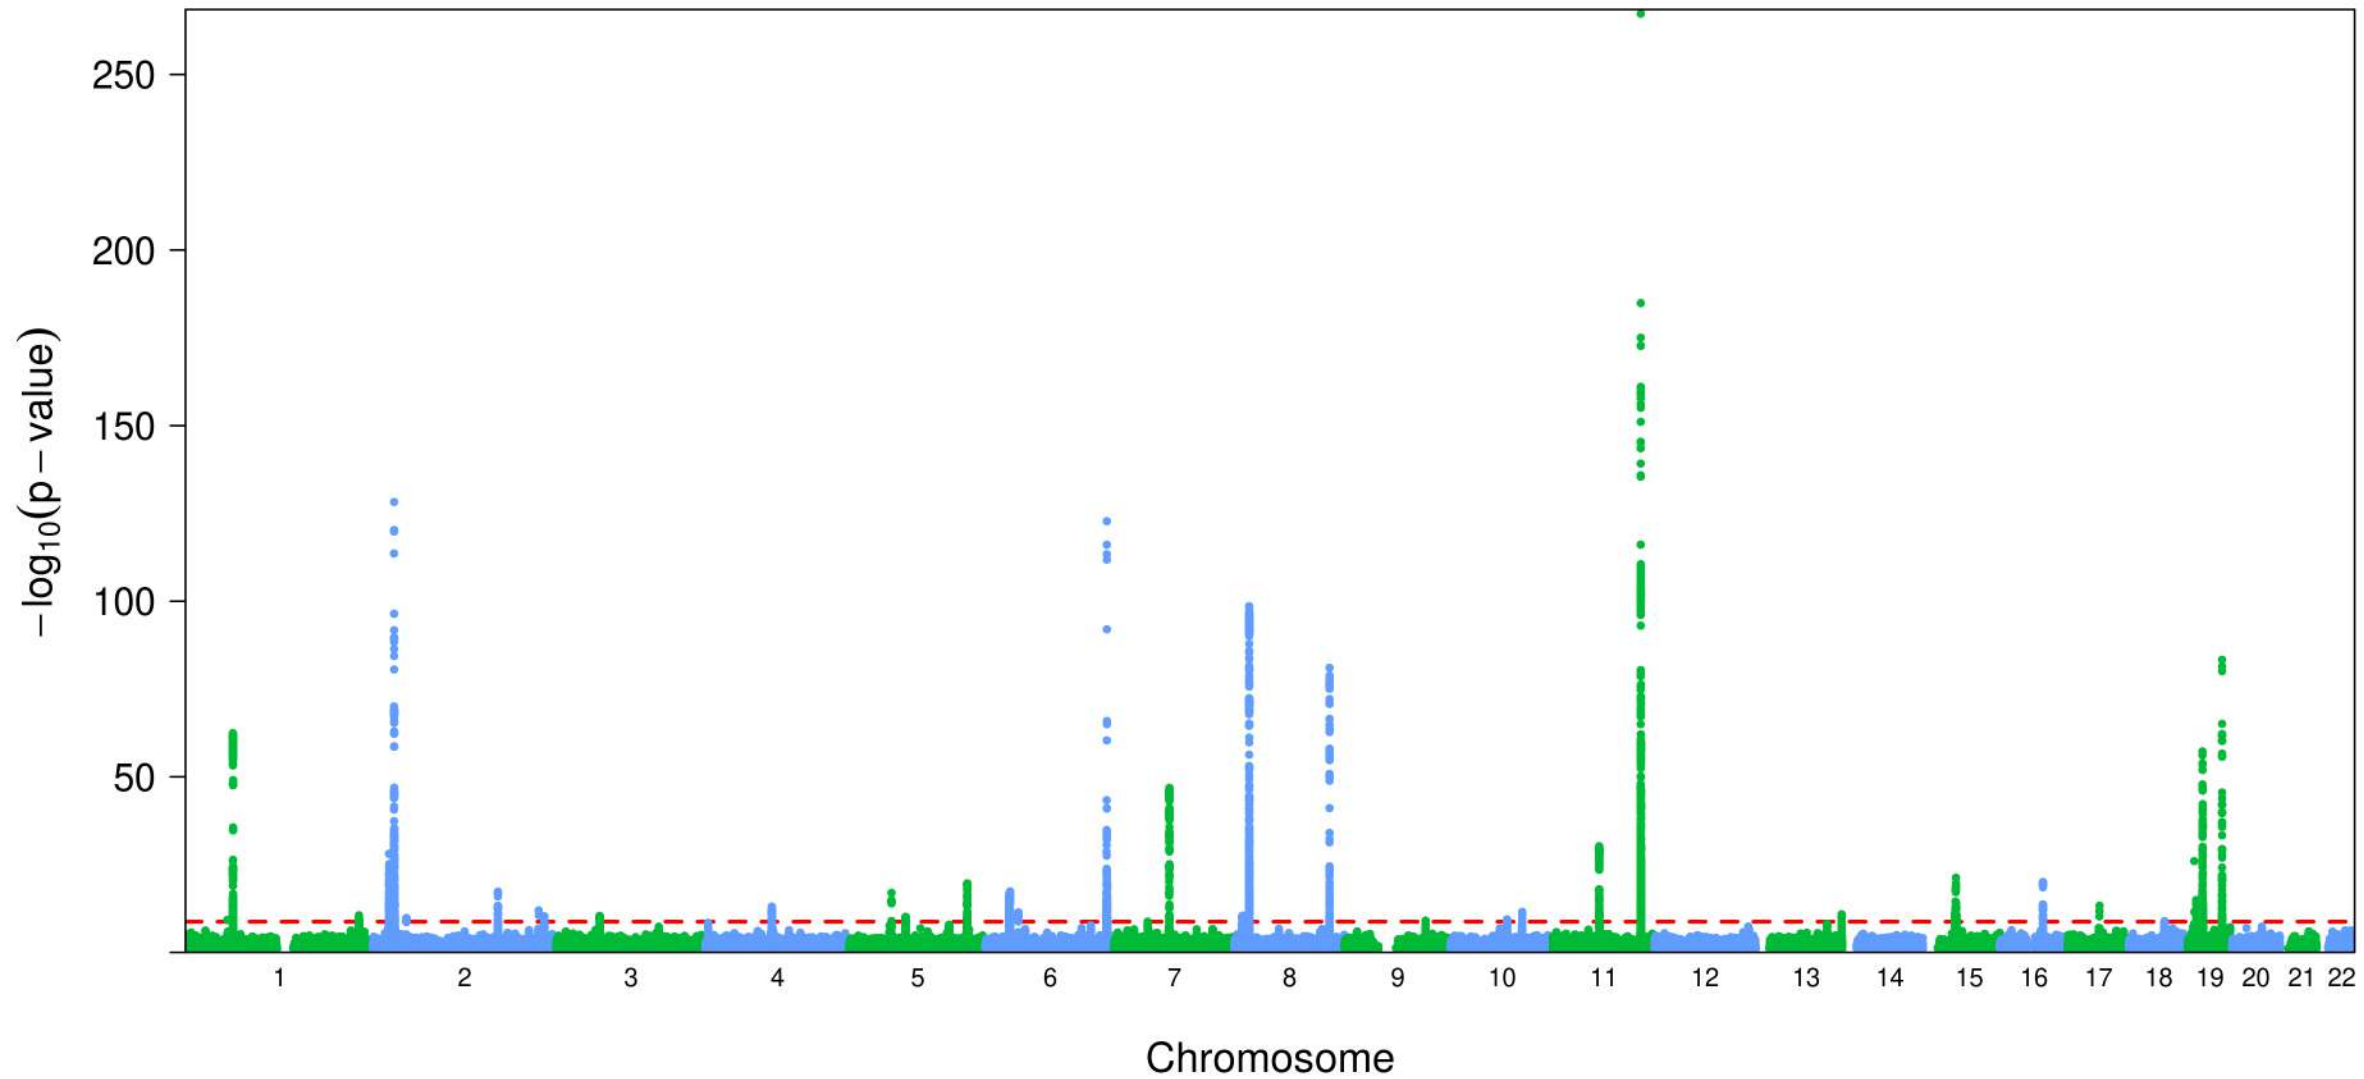

# XXL-VLDL-PL\_percent

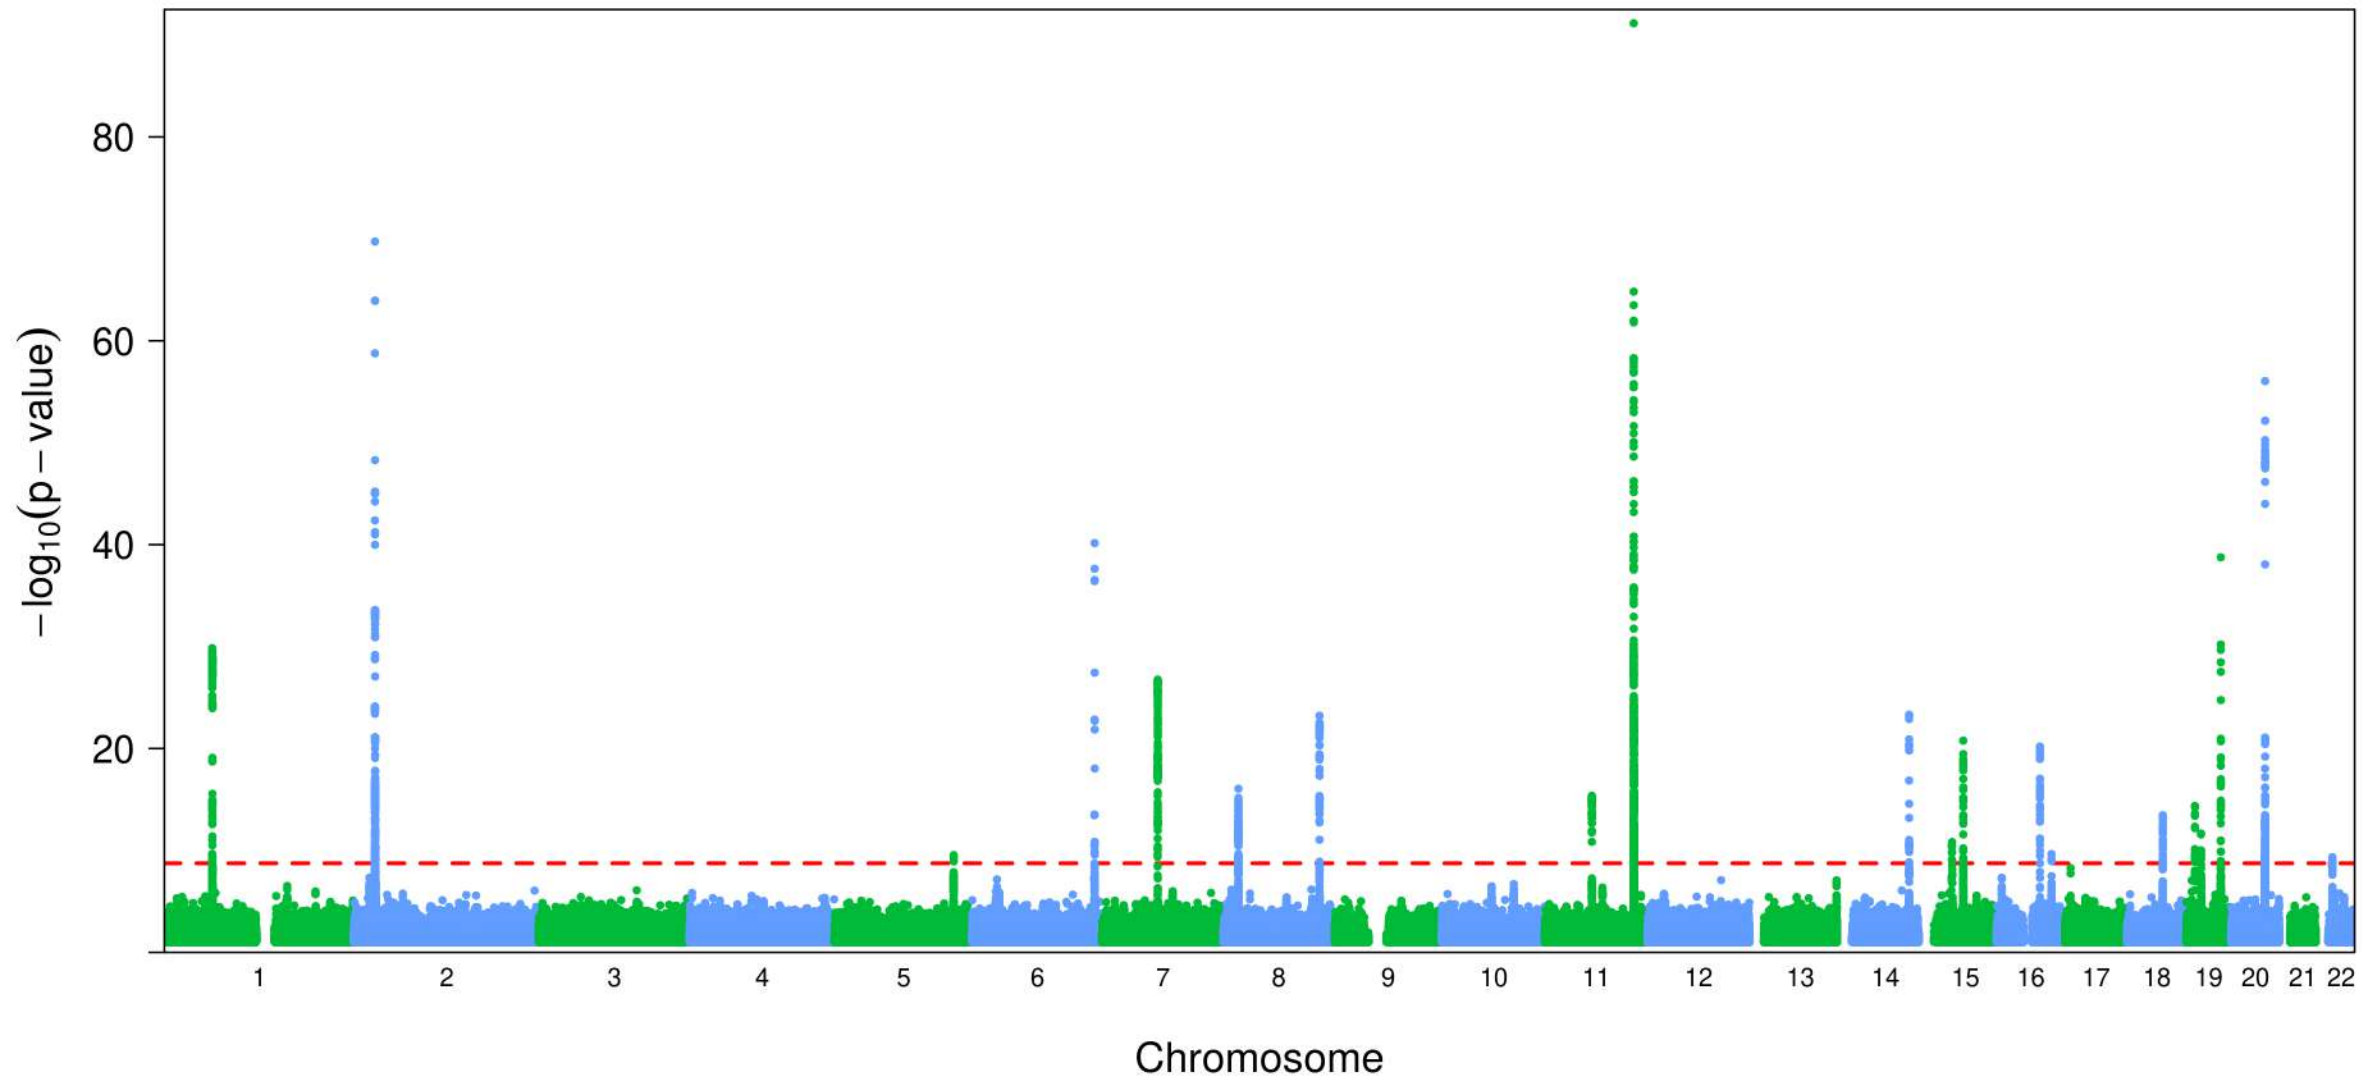

# XXL-VLDL-TG

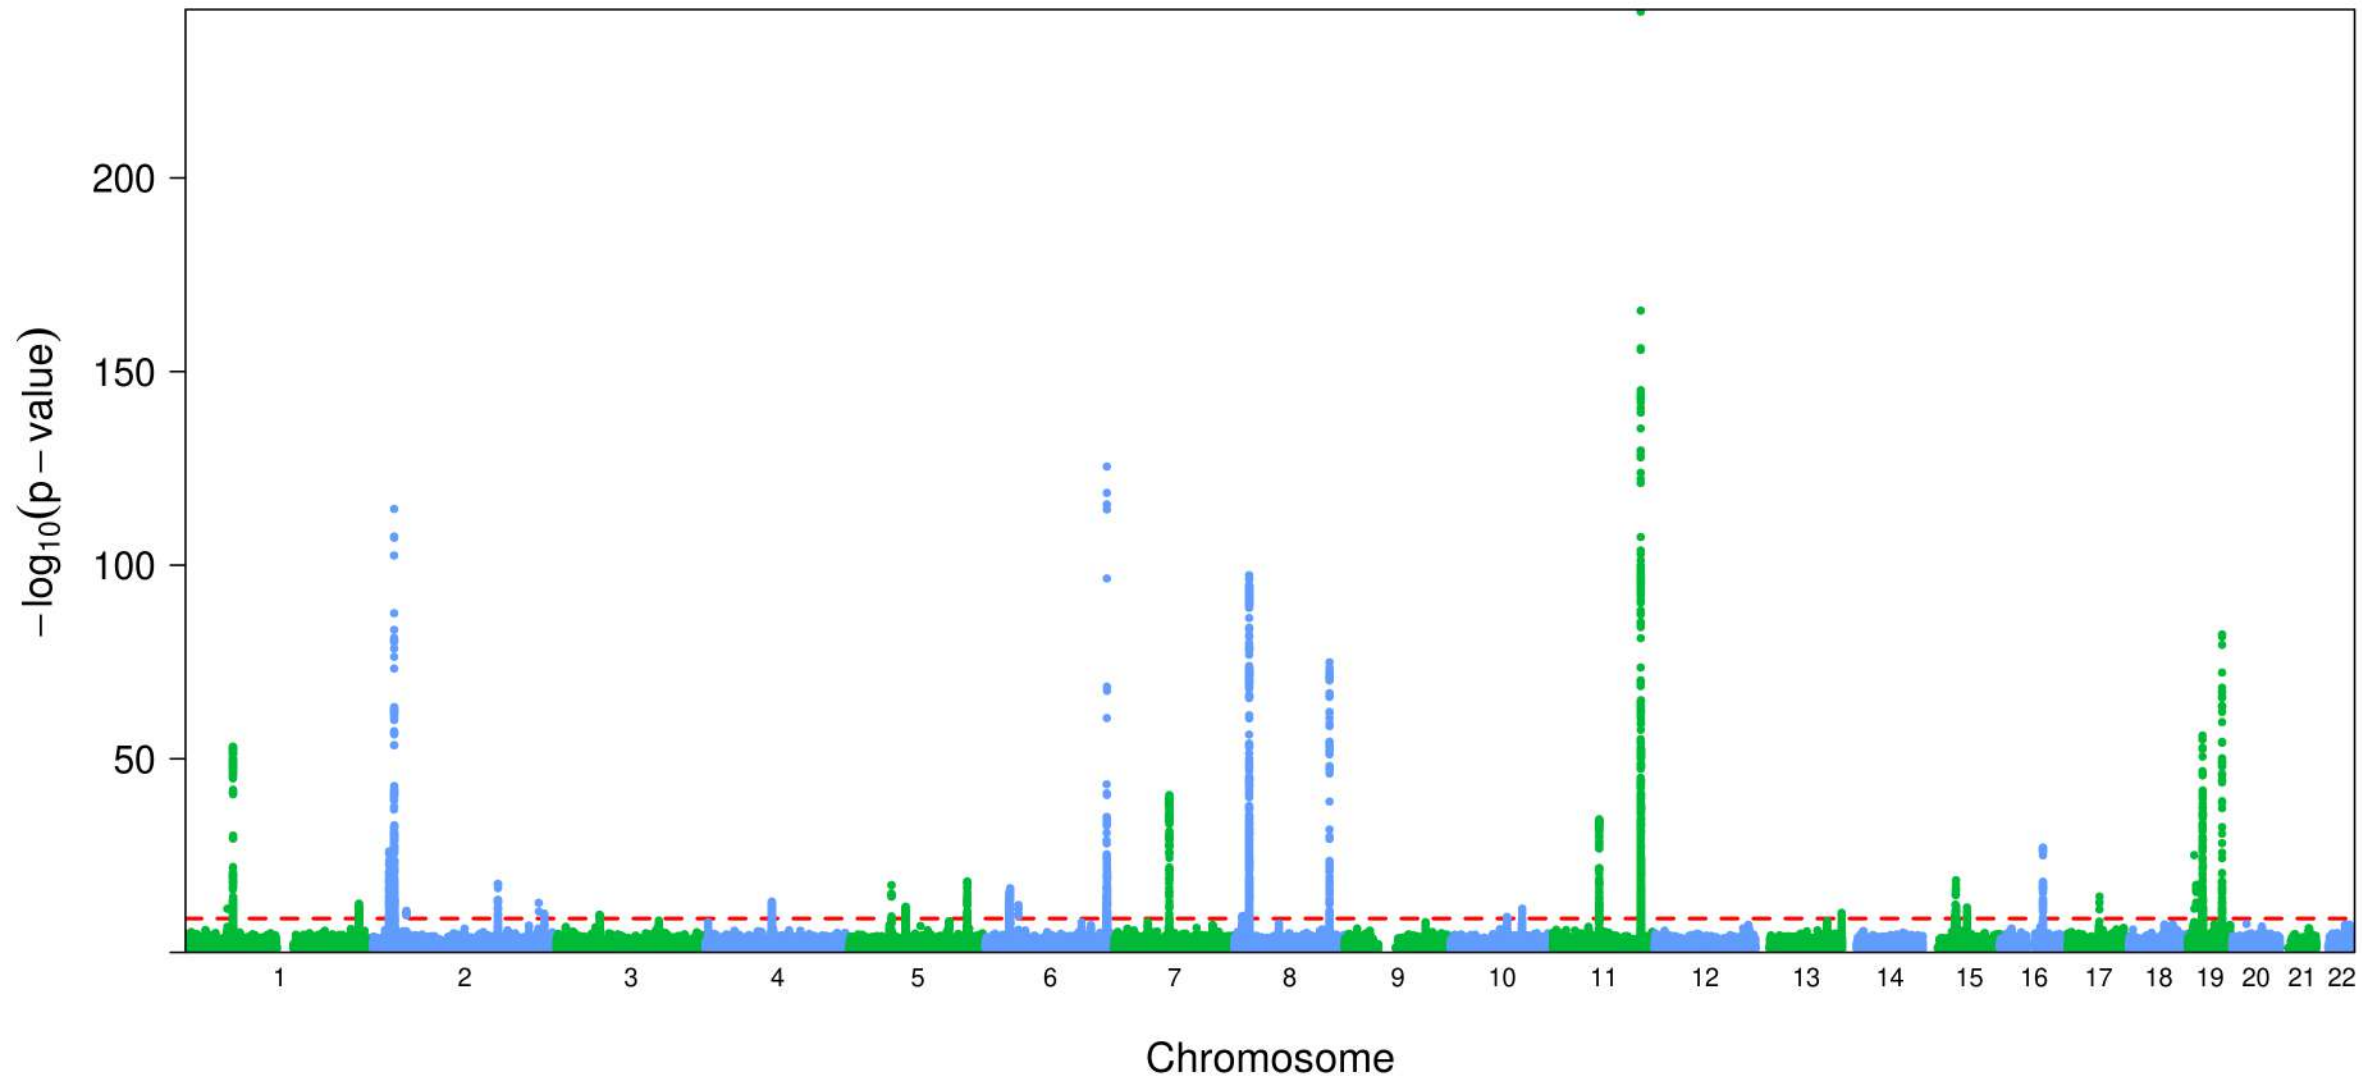



# XXL-VLDL-TG\_percent

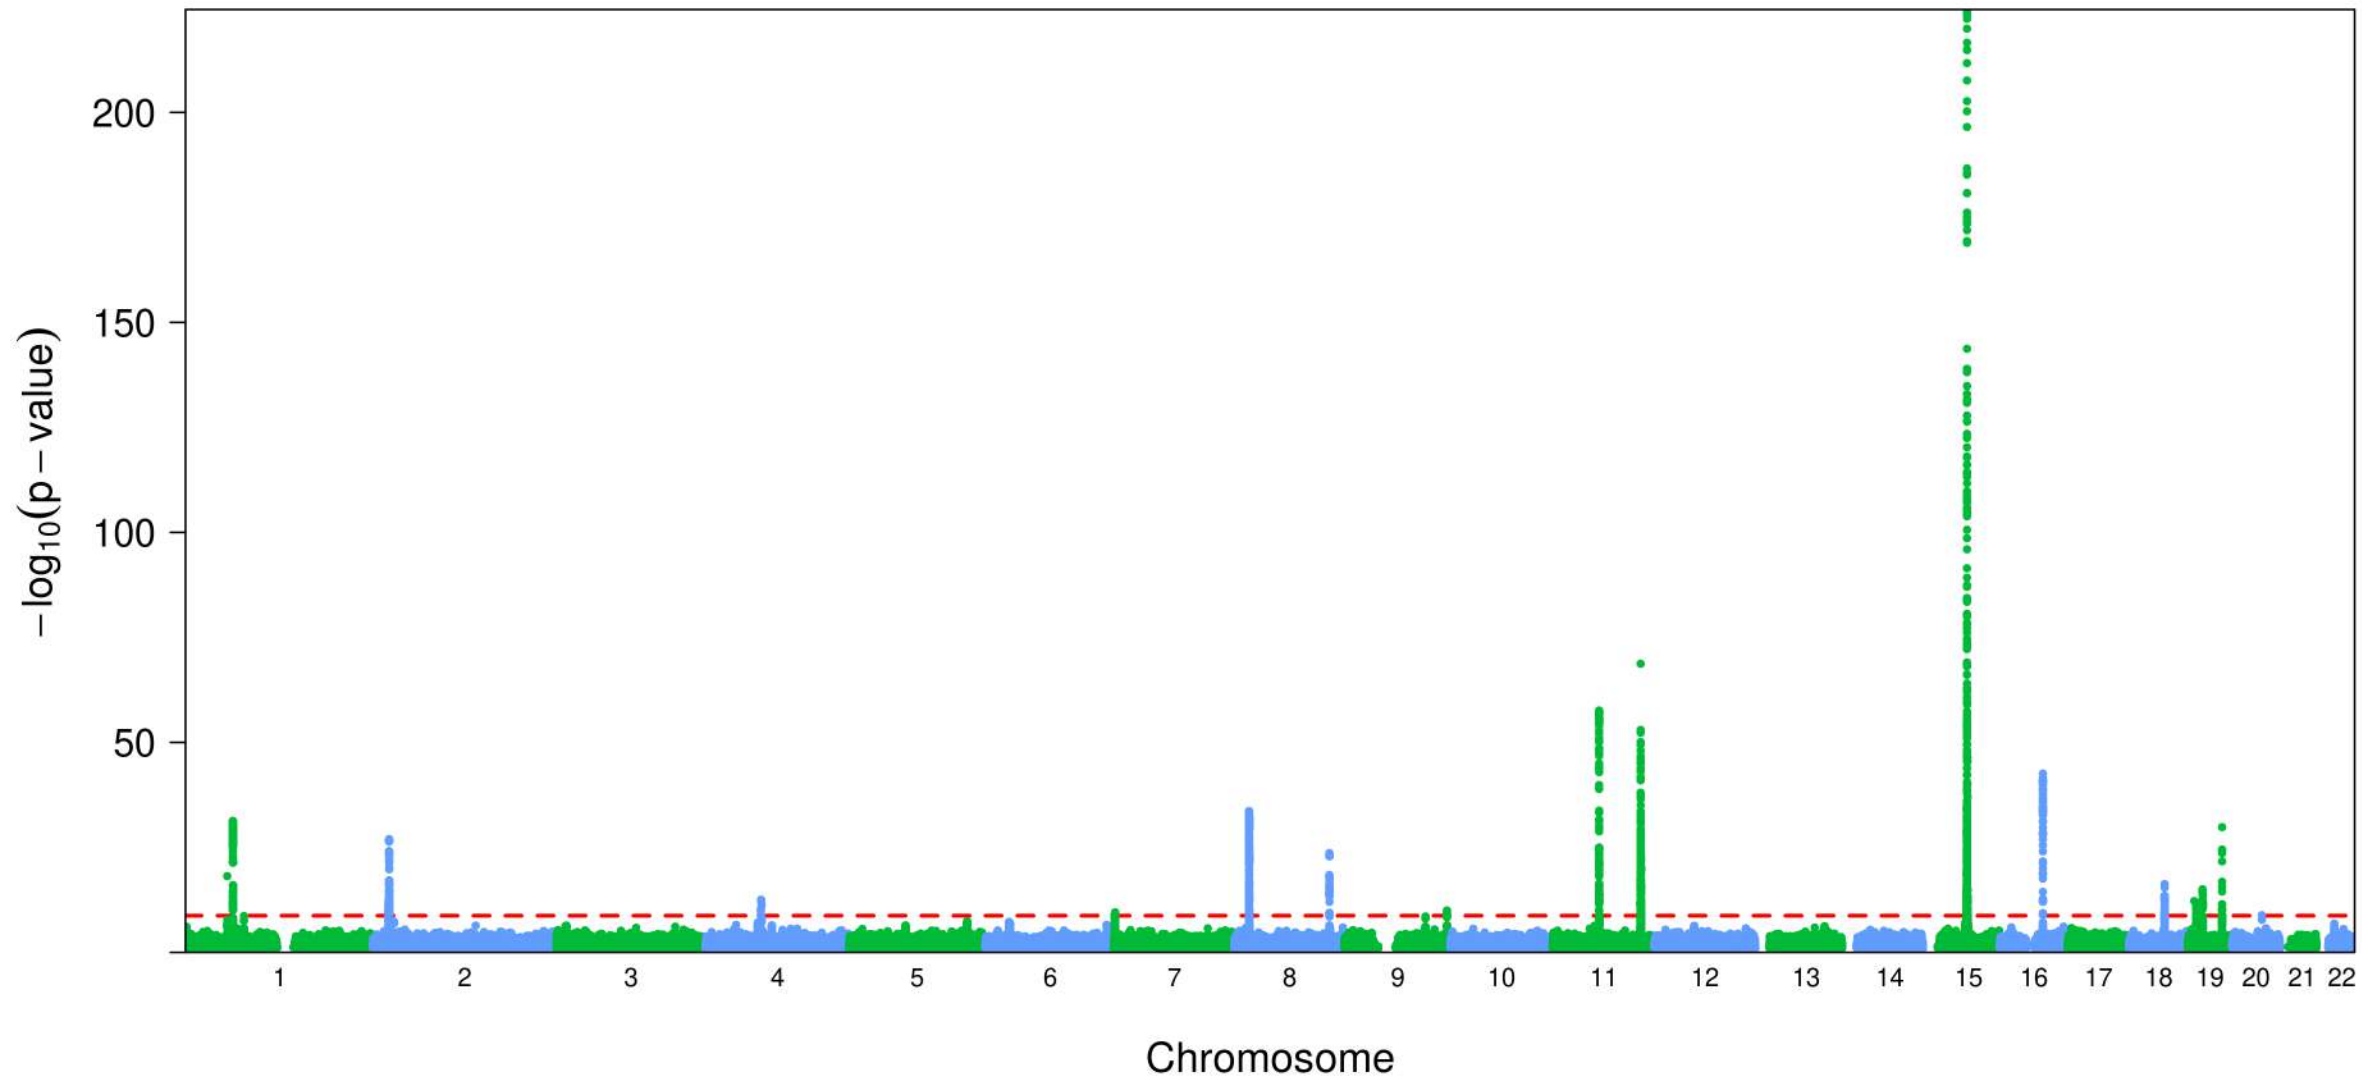

Supplement: 41586_2024_7148_MOESM3_ESM.pdf [file 41586_2024_7148_MOESM3_ESM.pdf]
