# Supplementary material for: Genome-wide characterization of circulating metabolic biomarkers
Source: PubMed Central journal article supplement (PMC10990933; doi:10.1038/s41586-024-07148-y), 2024-03-06

# 1\_1:Ala

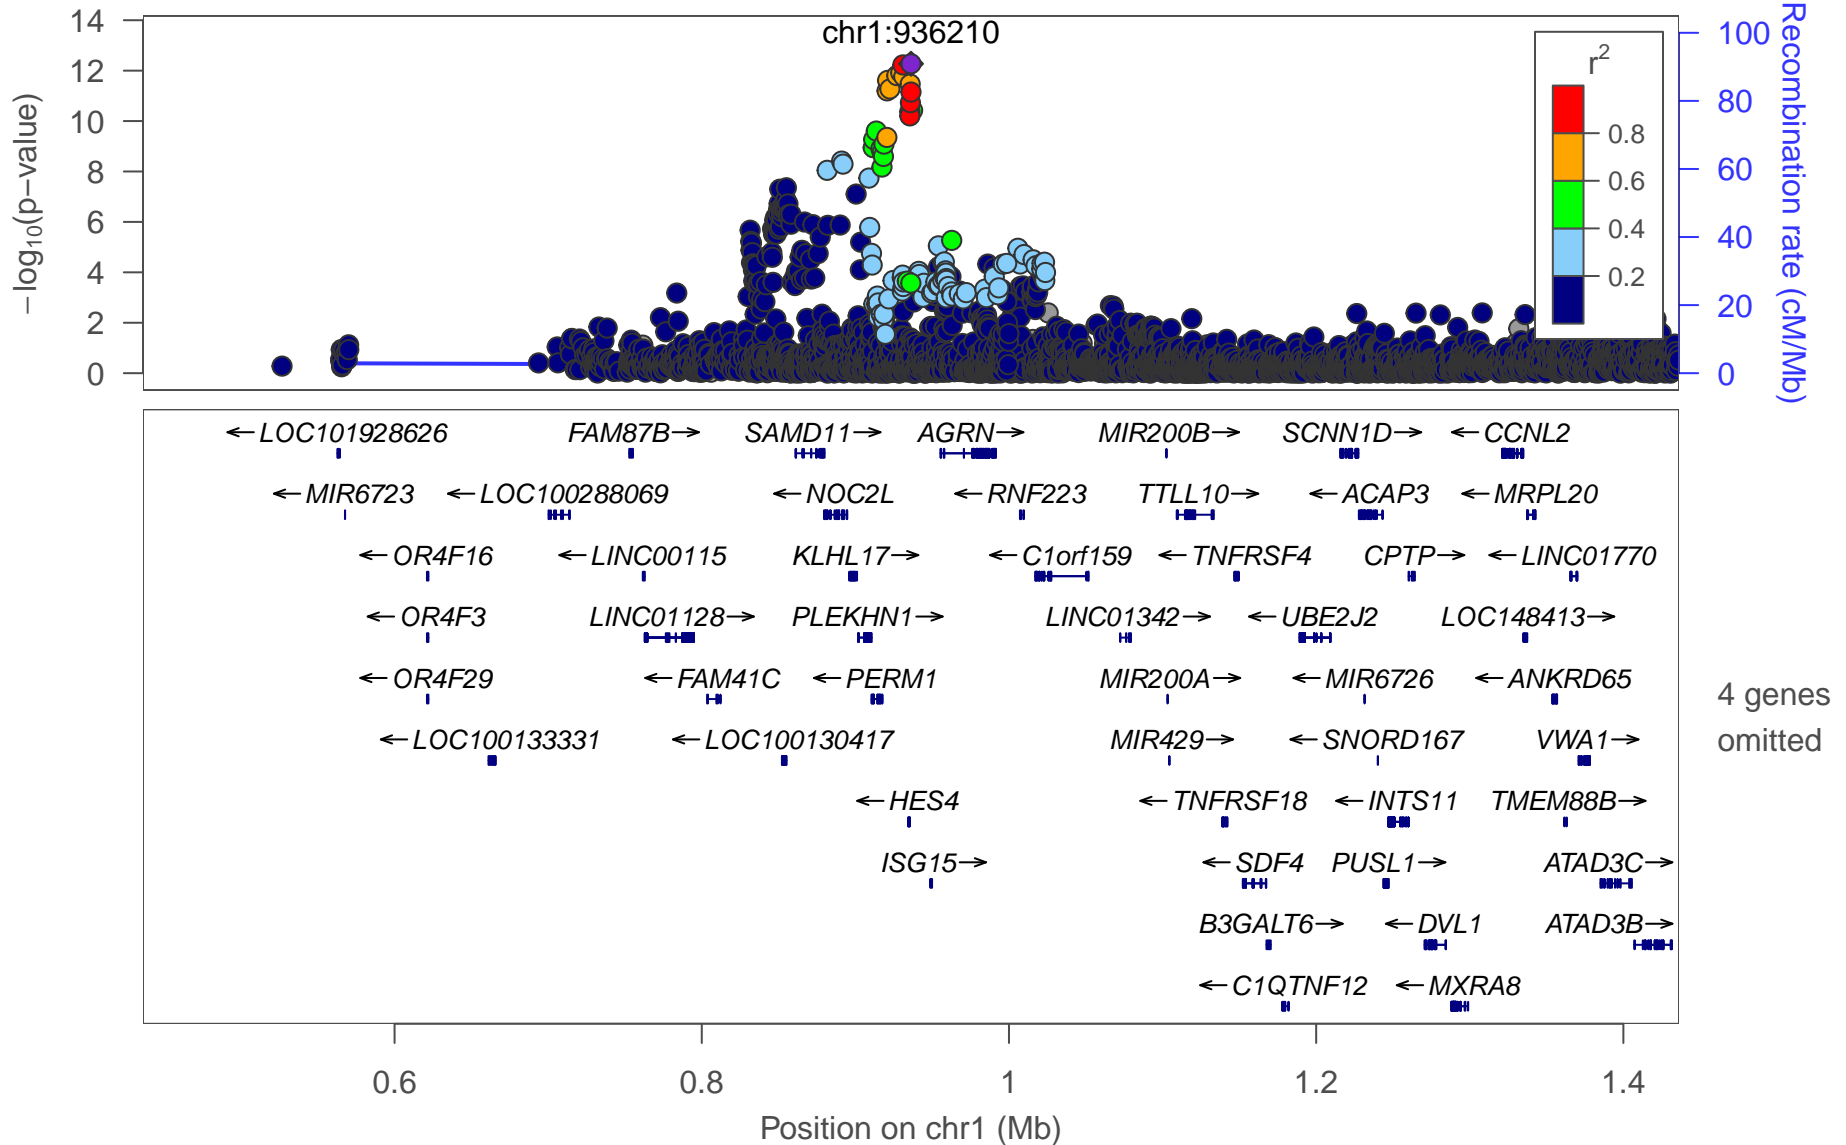

# 1\_2:LAbyFA

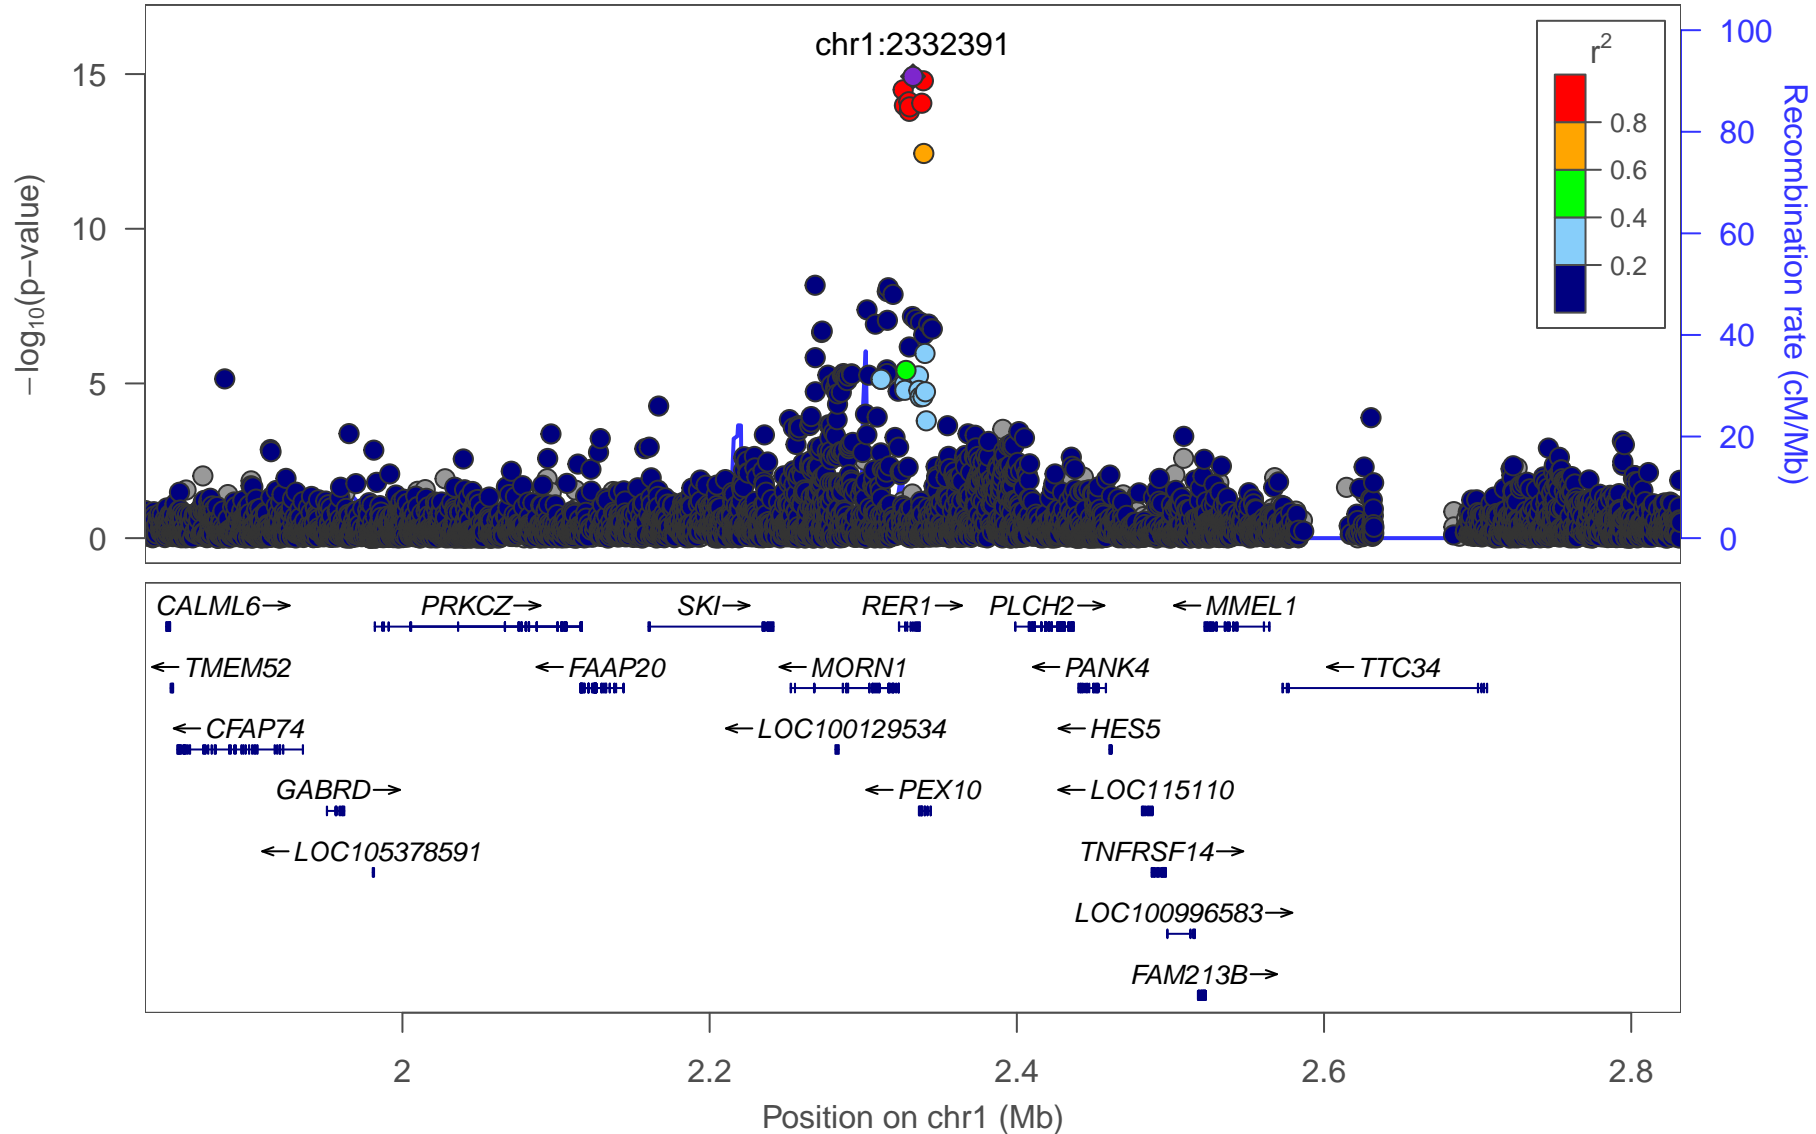

# 1\_3:Ala

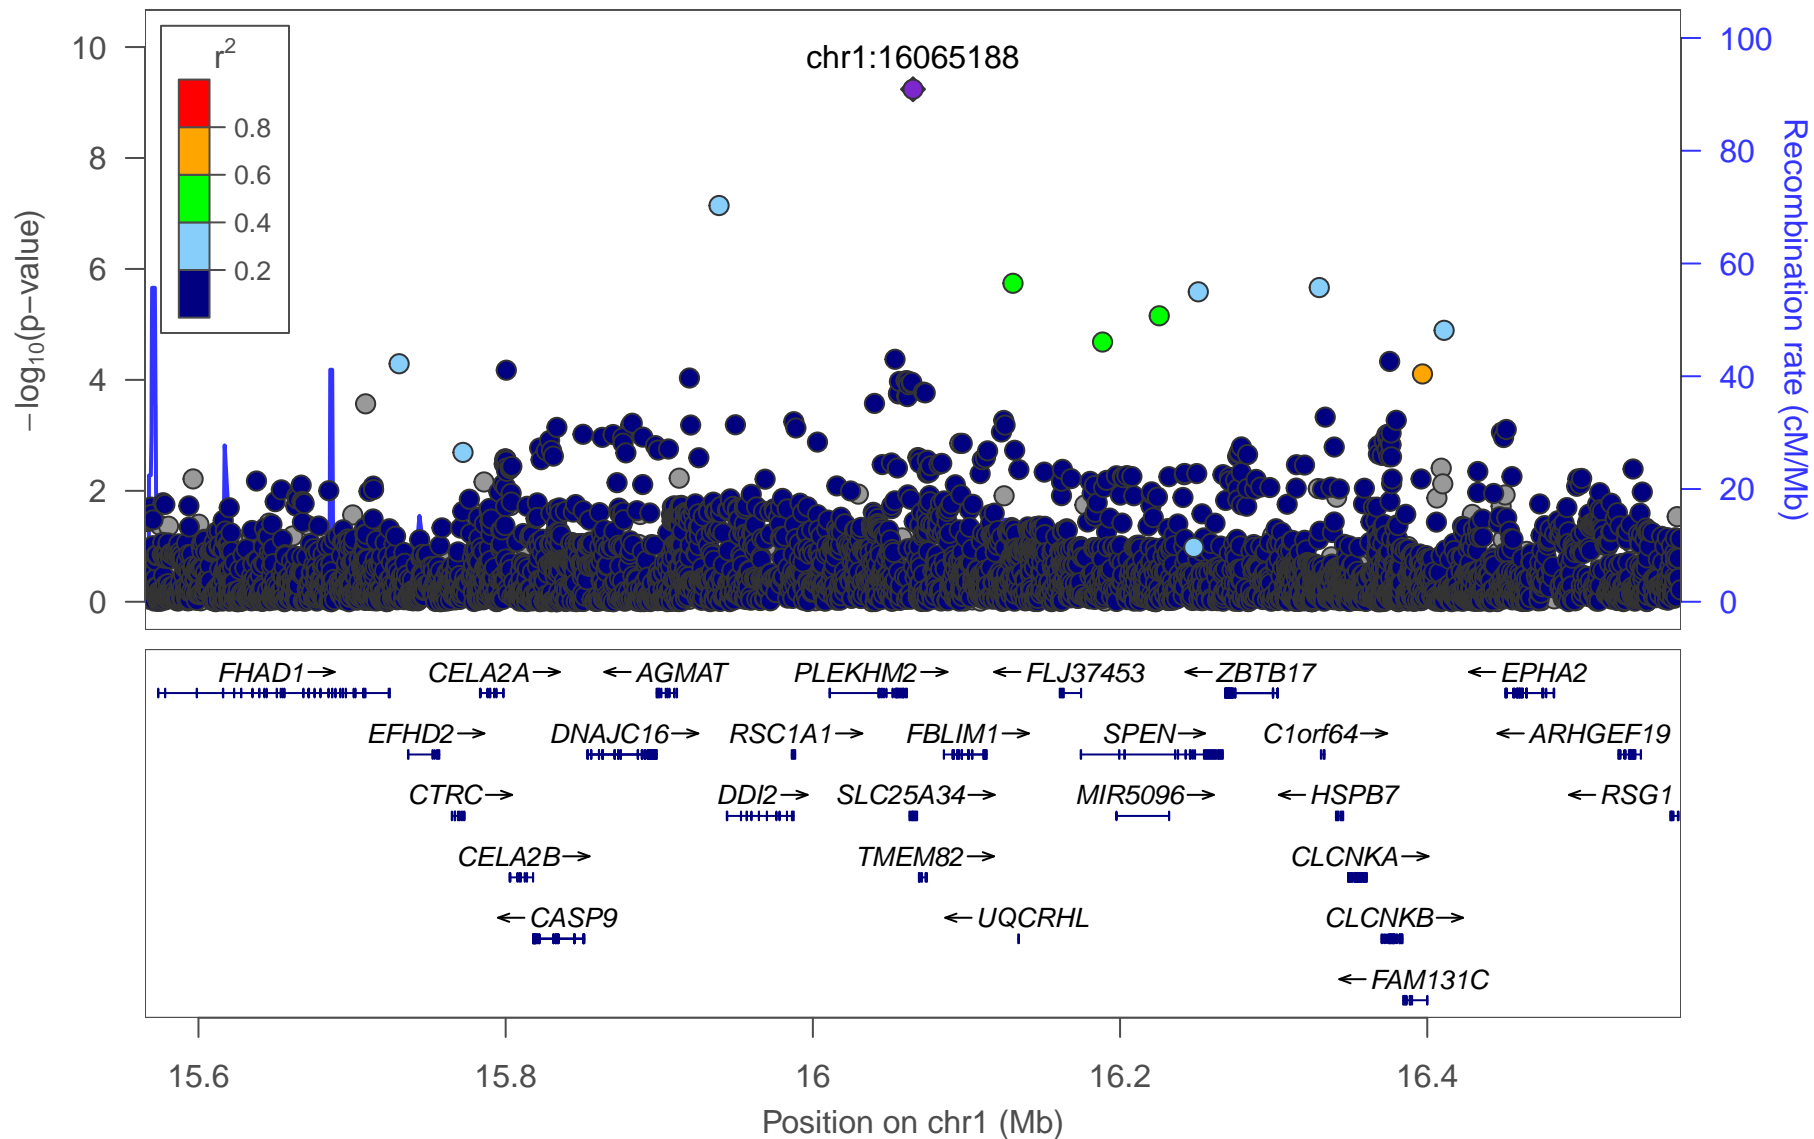

# 1\_4:S-HDL-FC

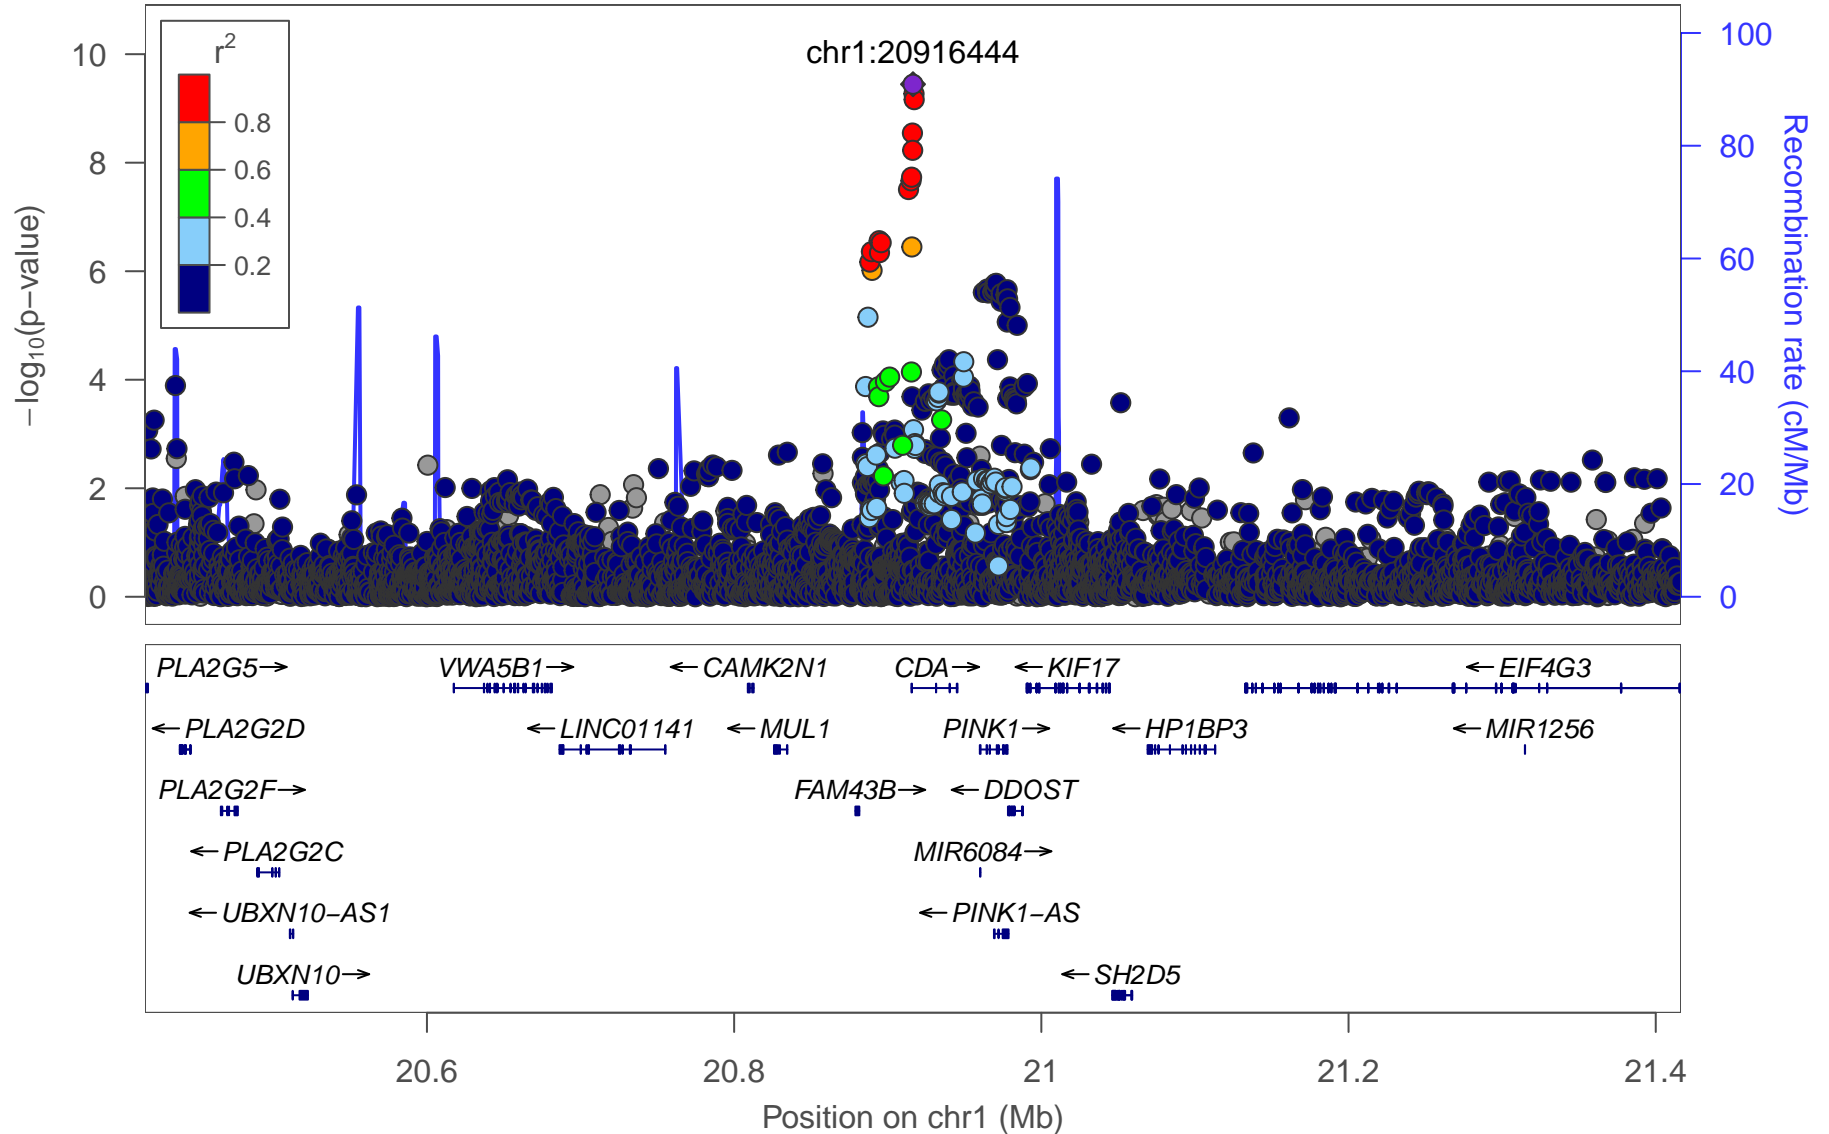

# 1\_5:Crea

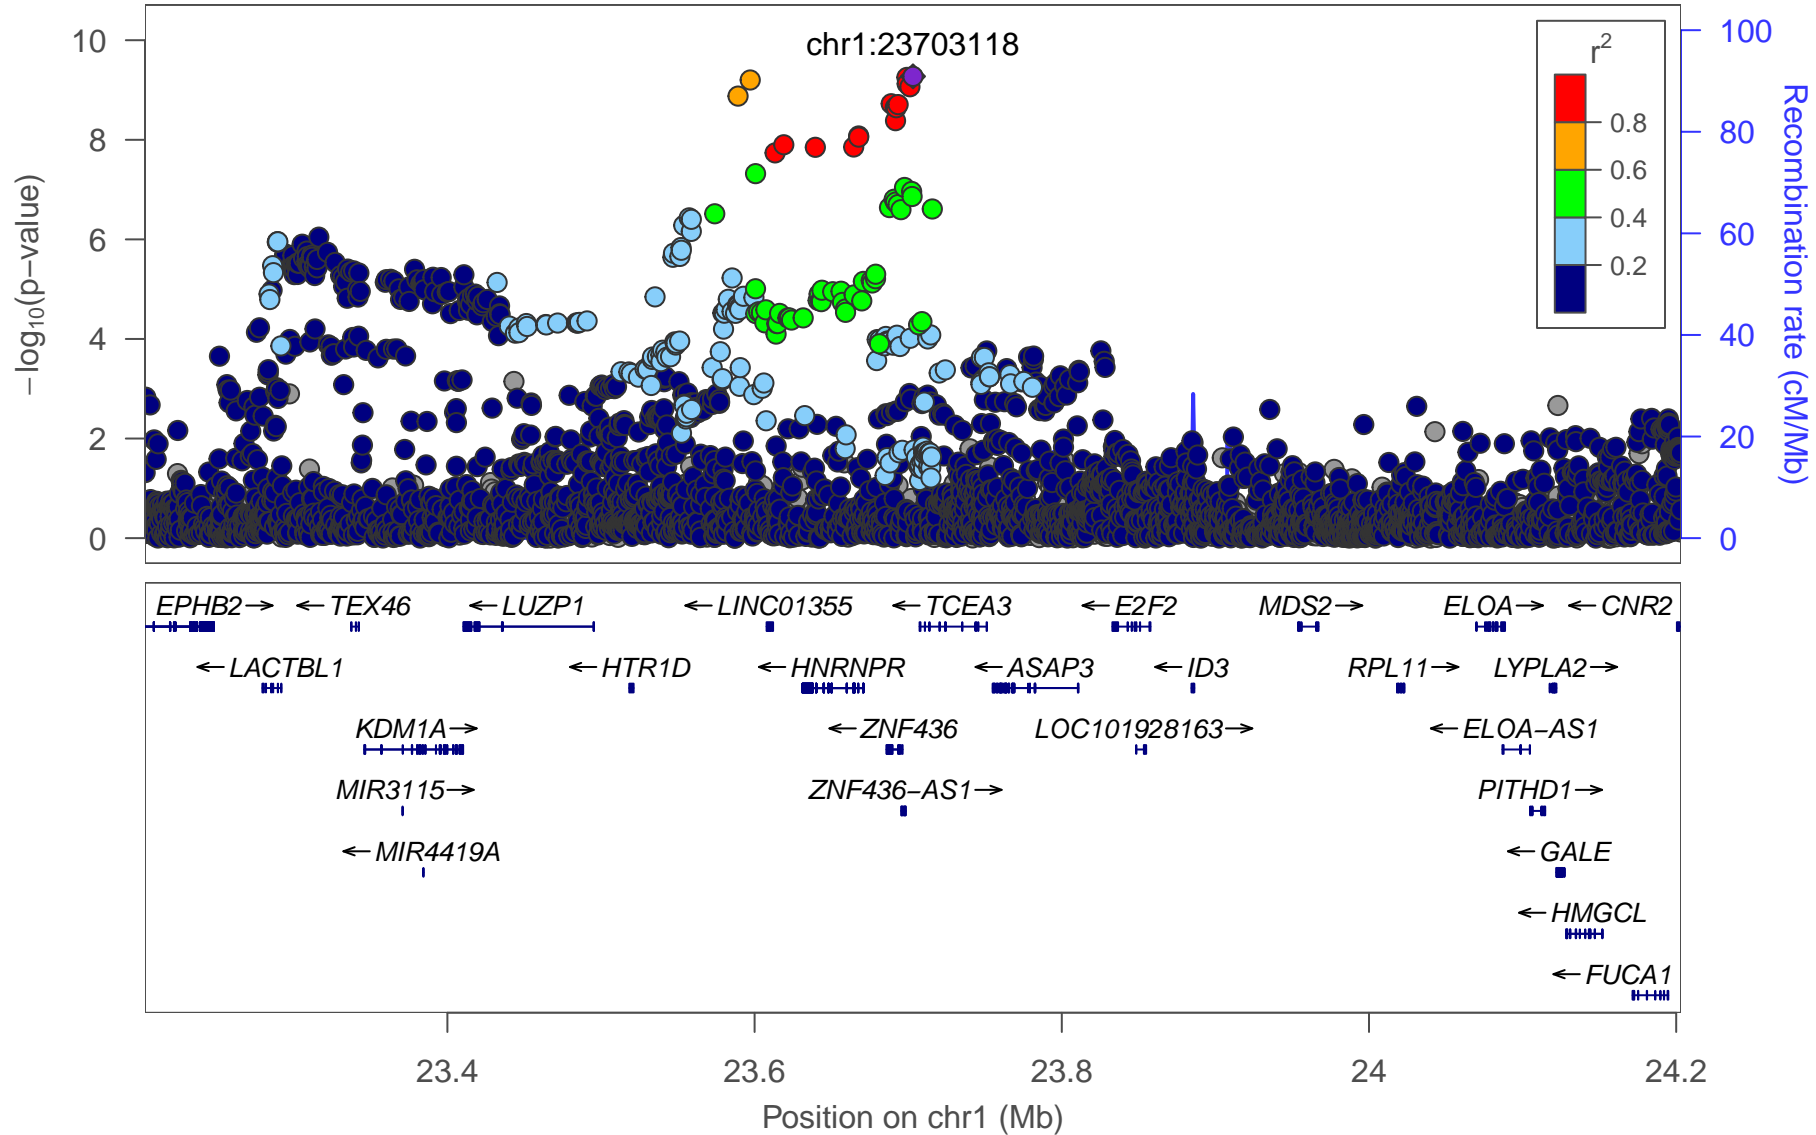

# 1\_6:M-LDL-P

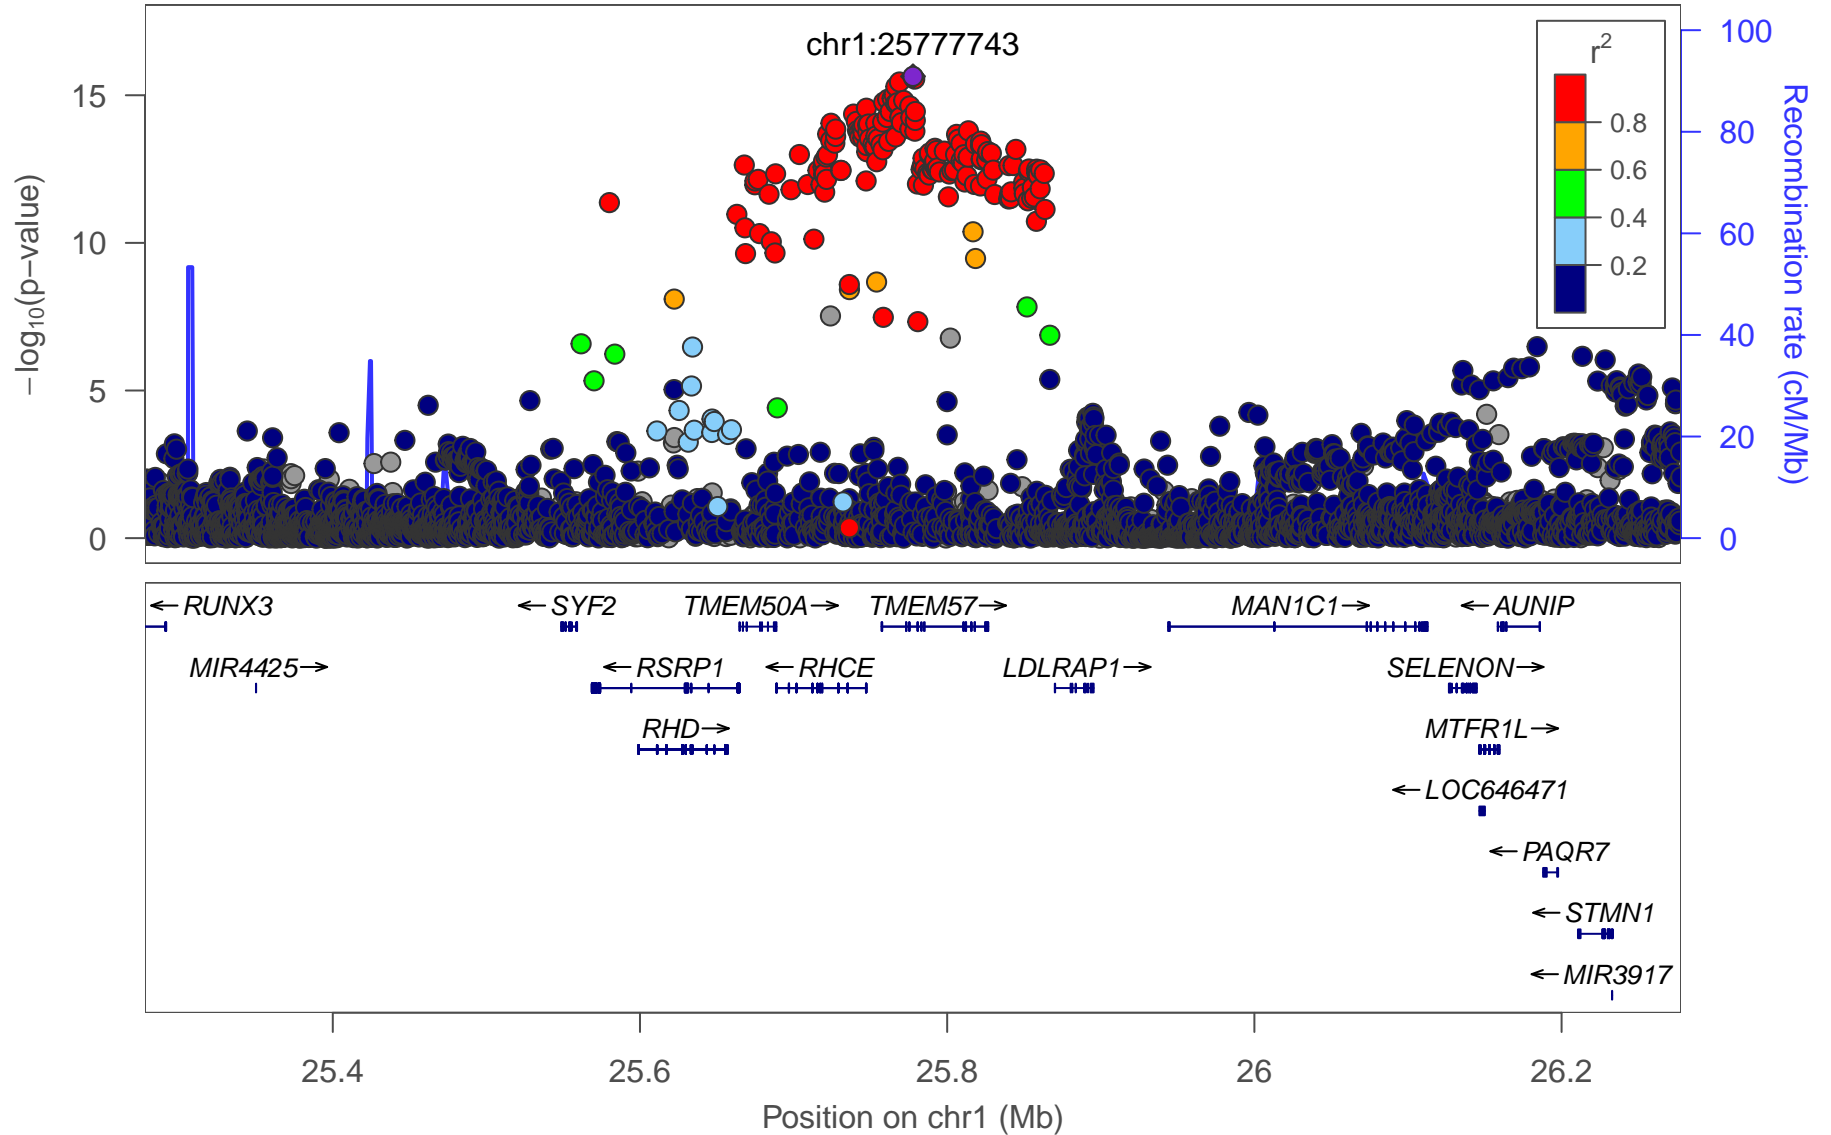

# 1\_7:ApoBbyApoA1

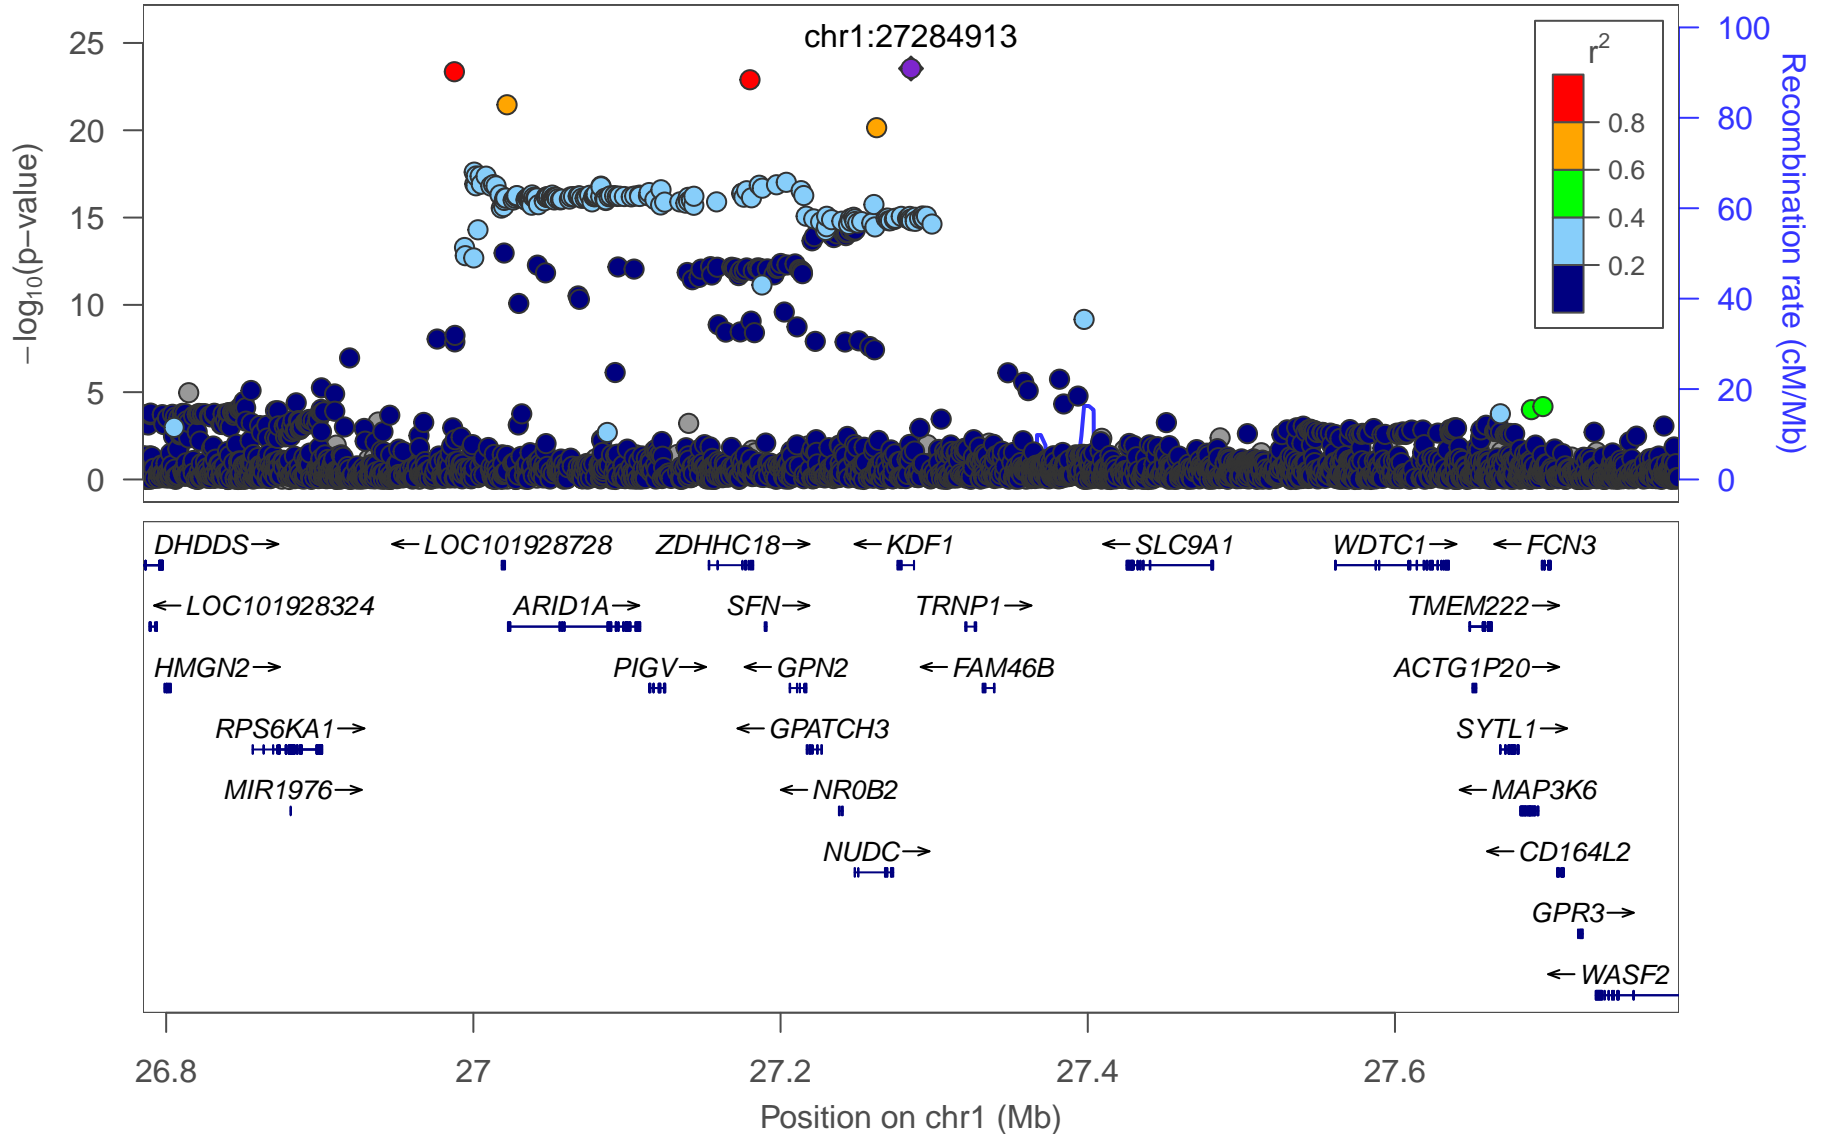

# 1\_8:HDL2-C

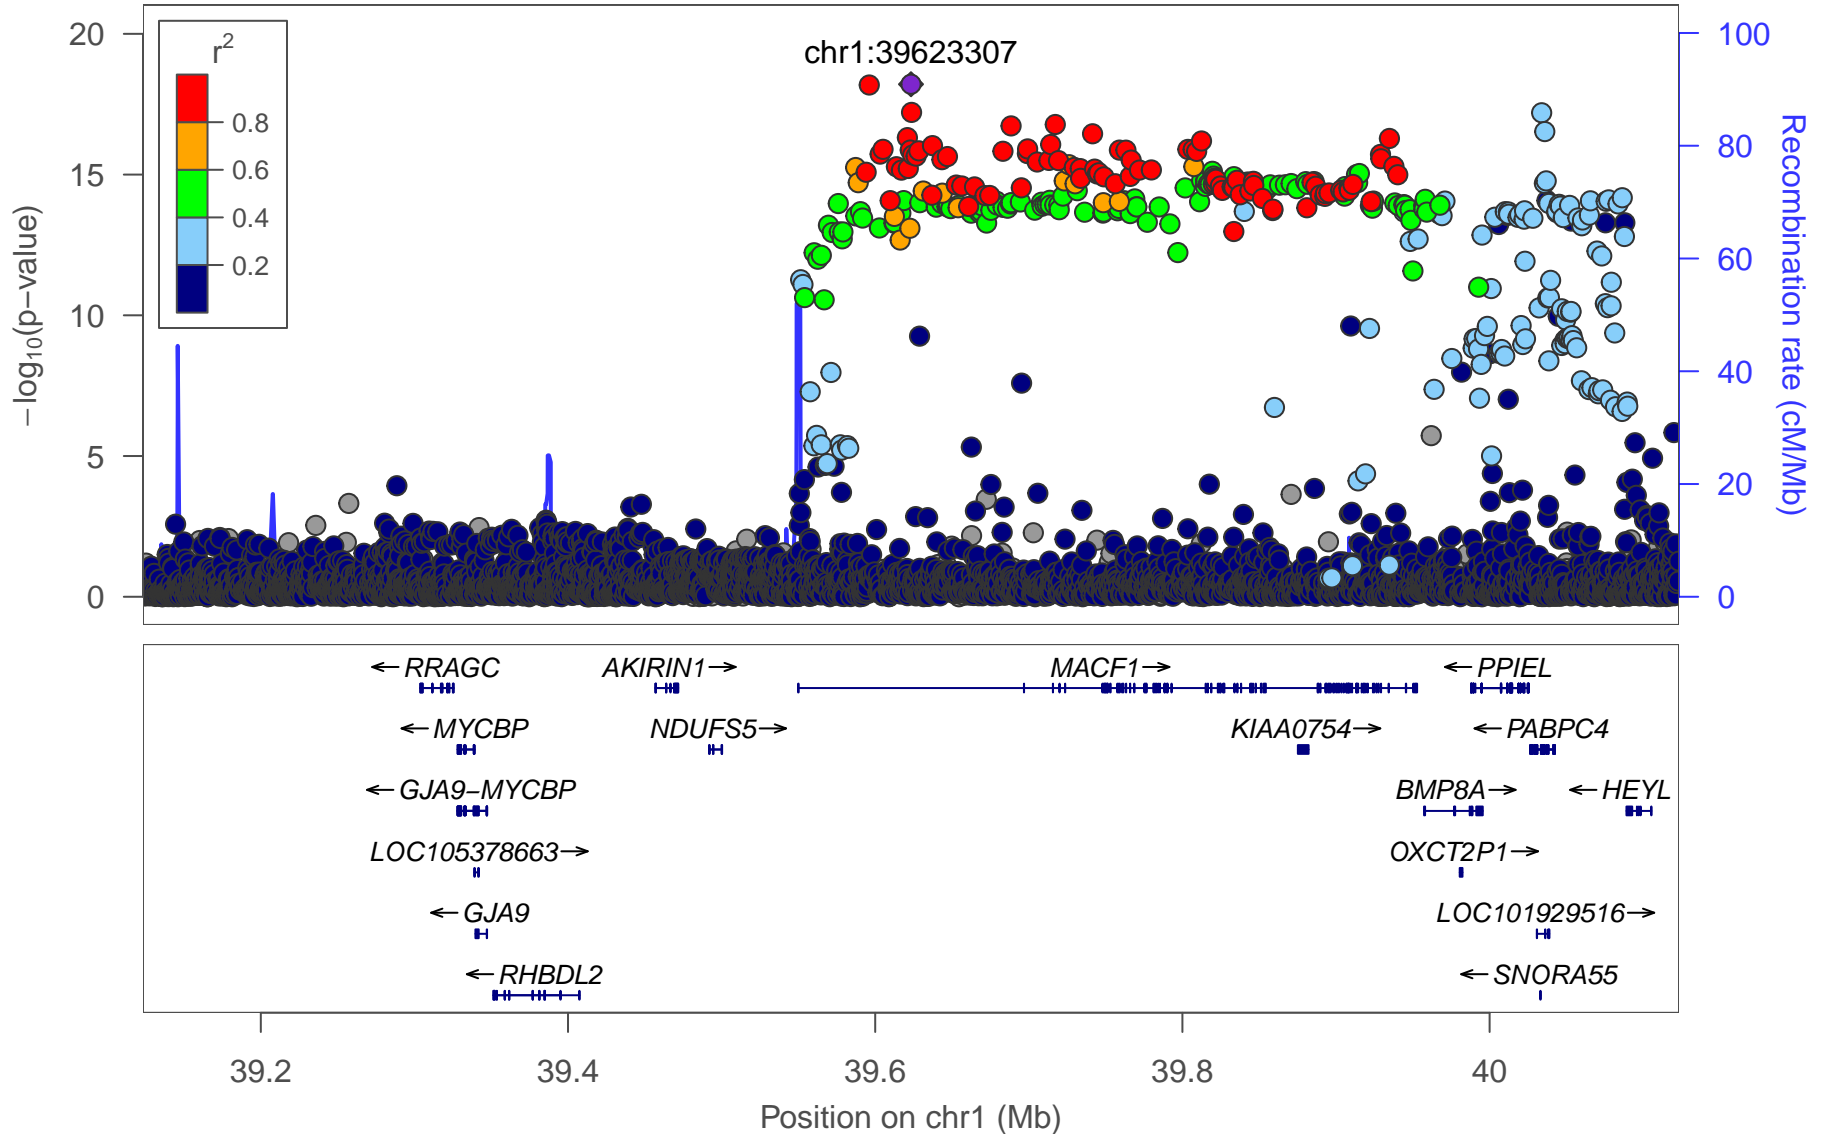



# 1\_9:IDL-FC

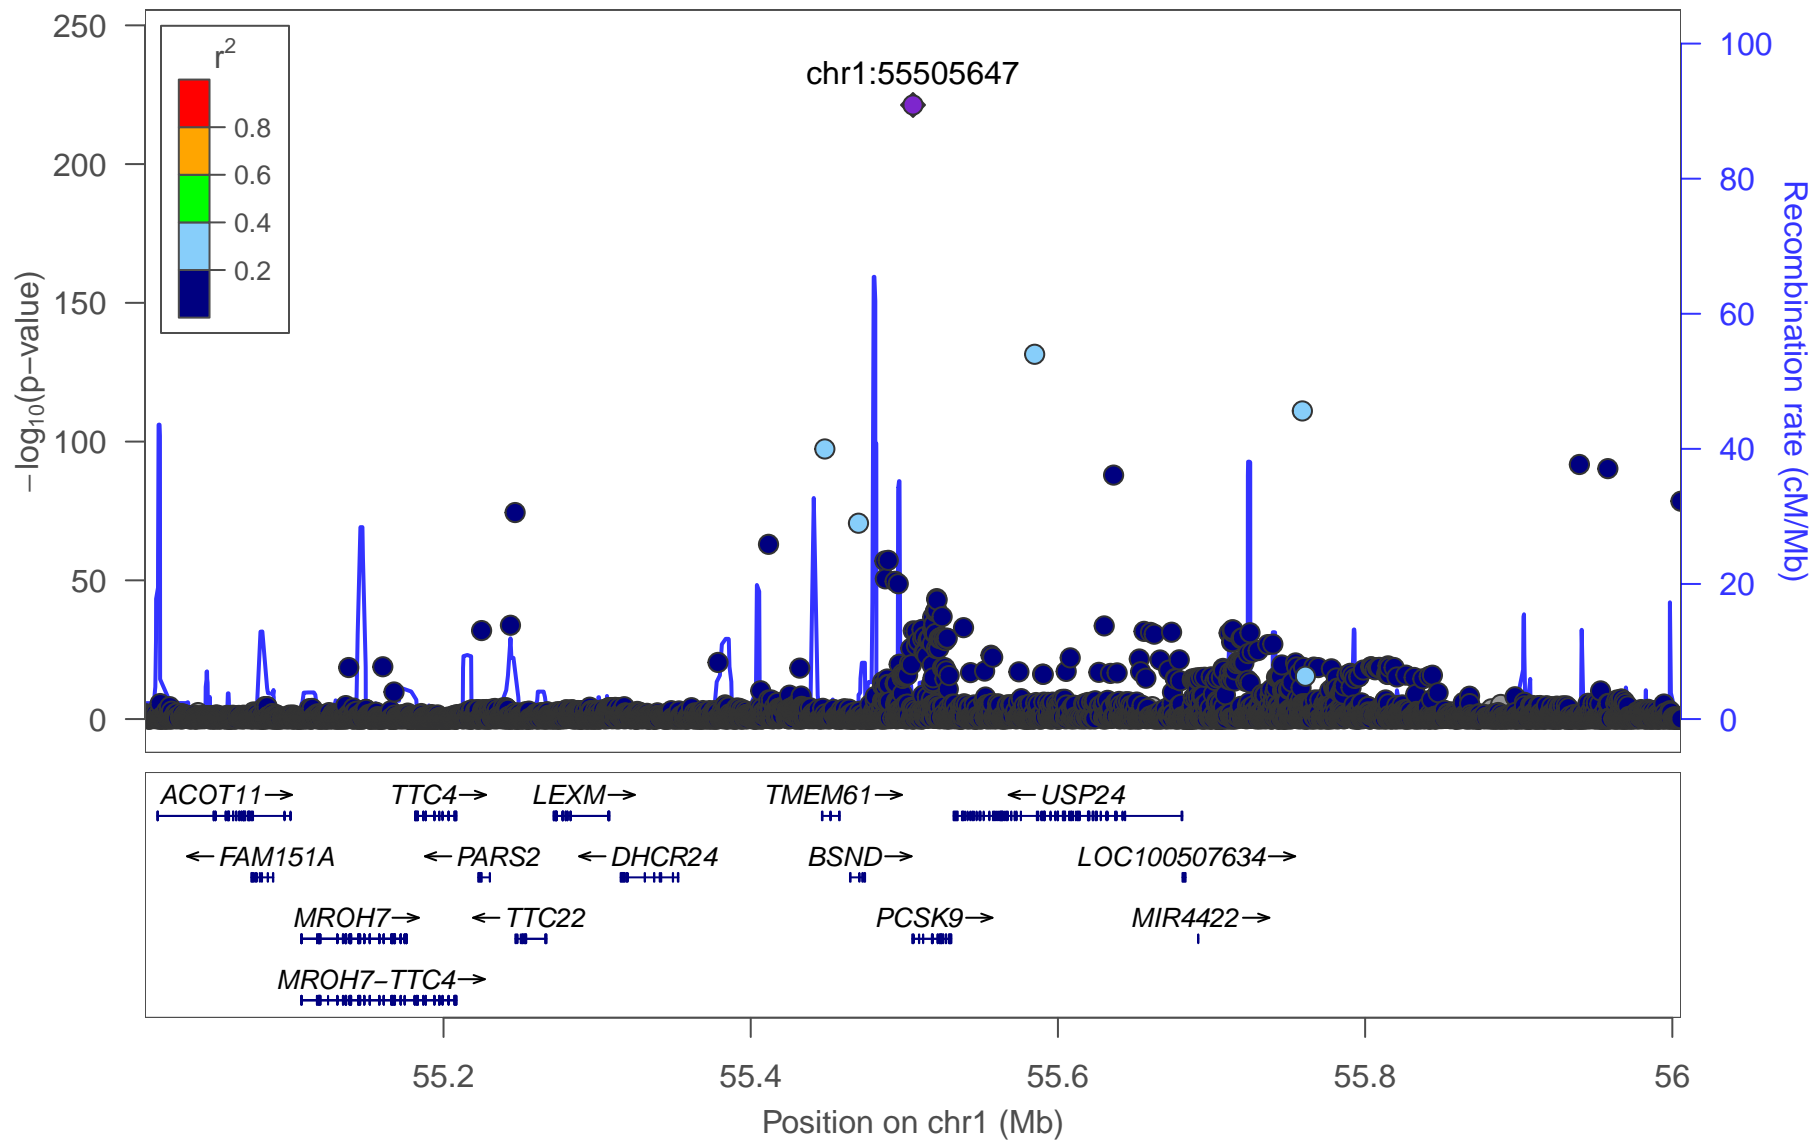

# 1\_10:M-HDL-TG

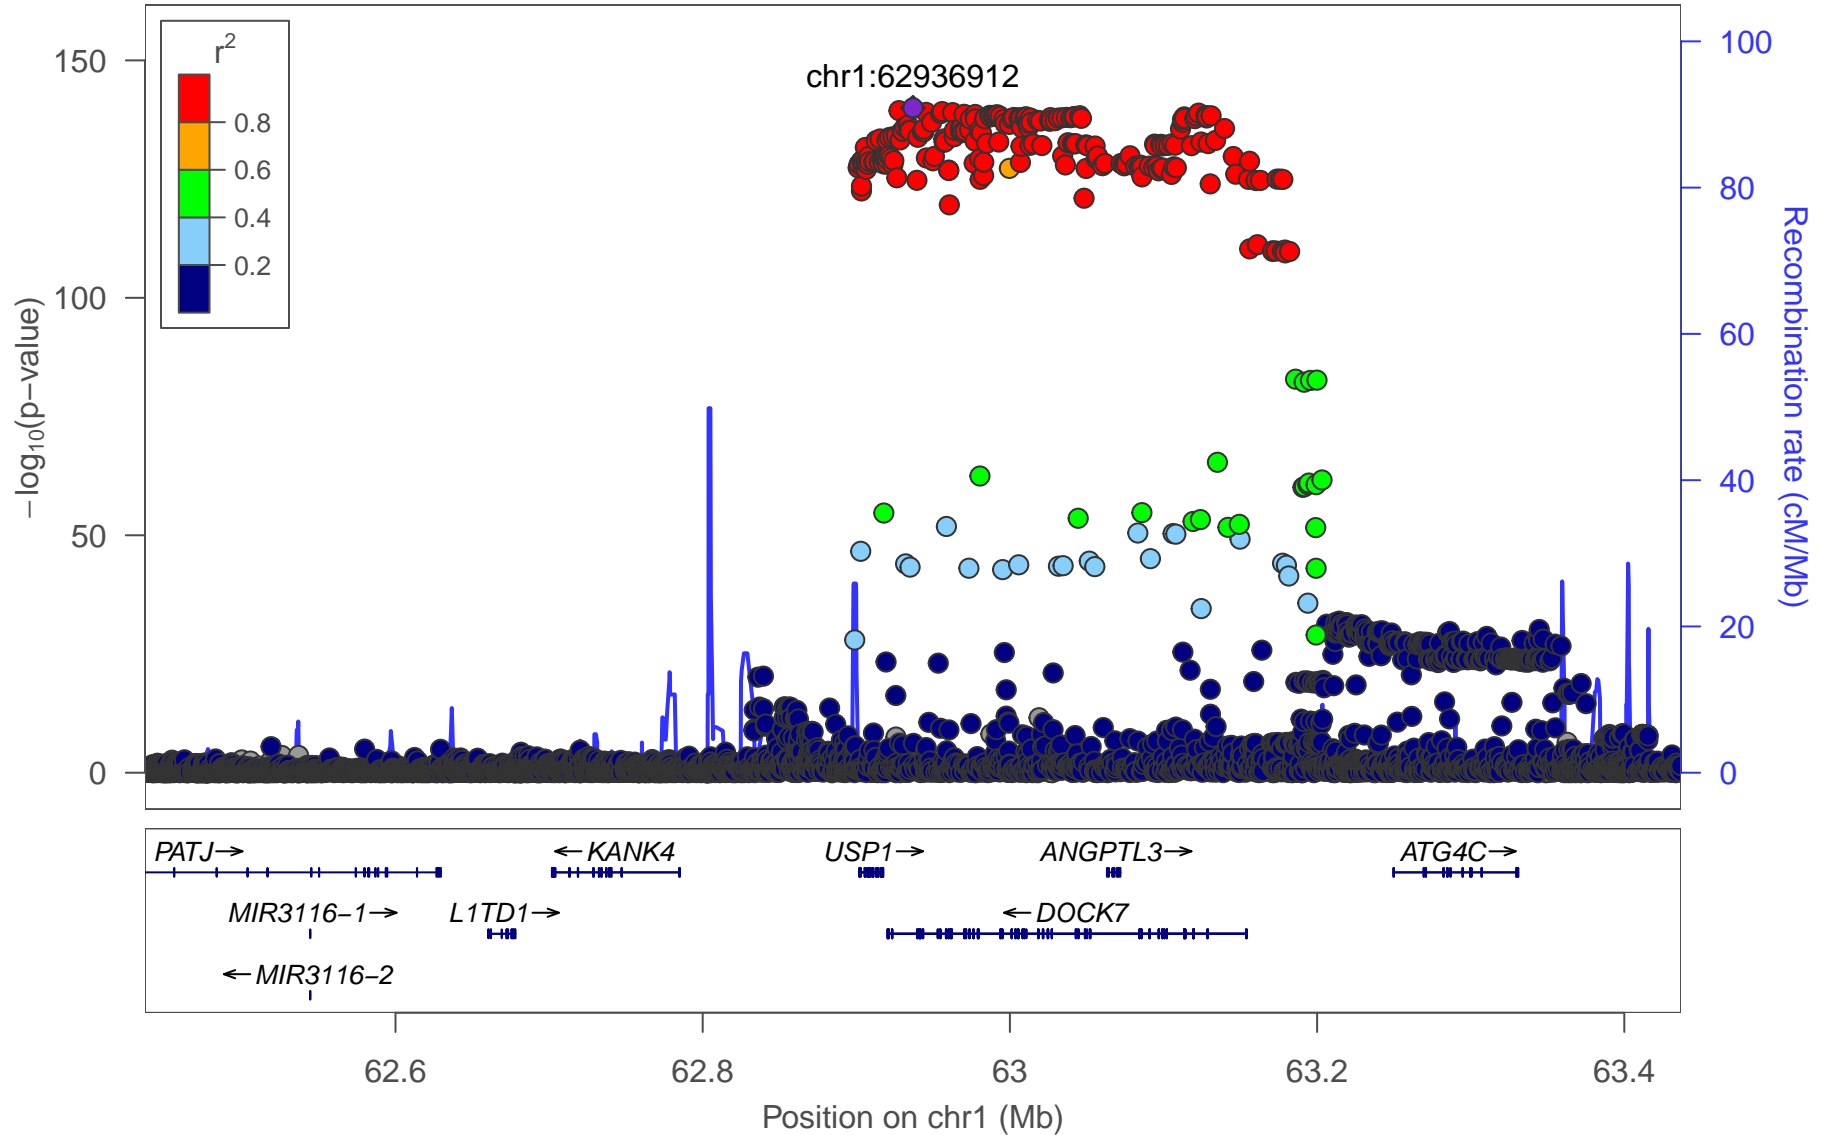

# 1\_11:Gly

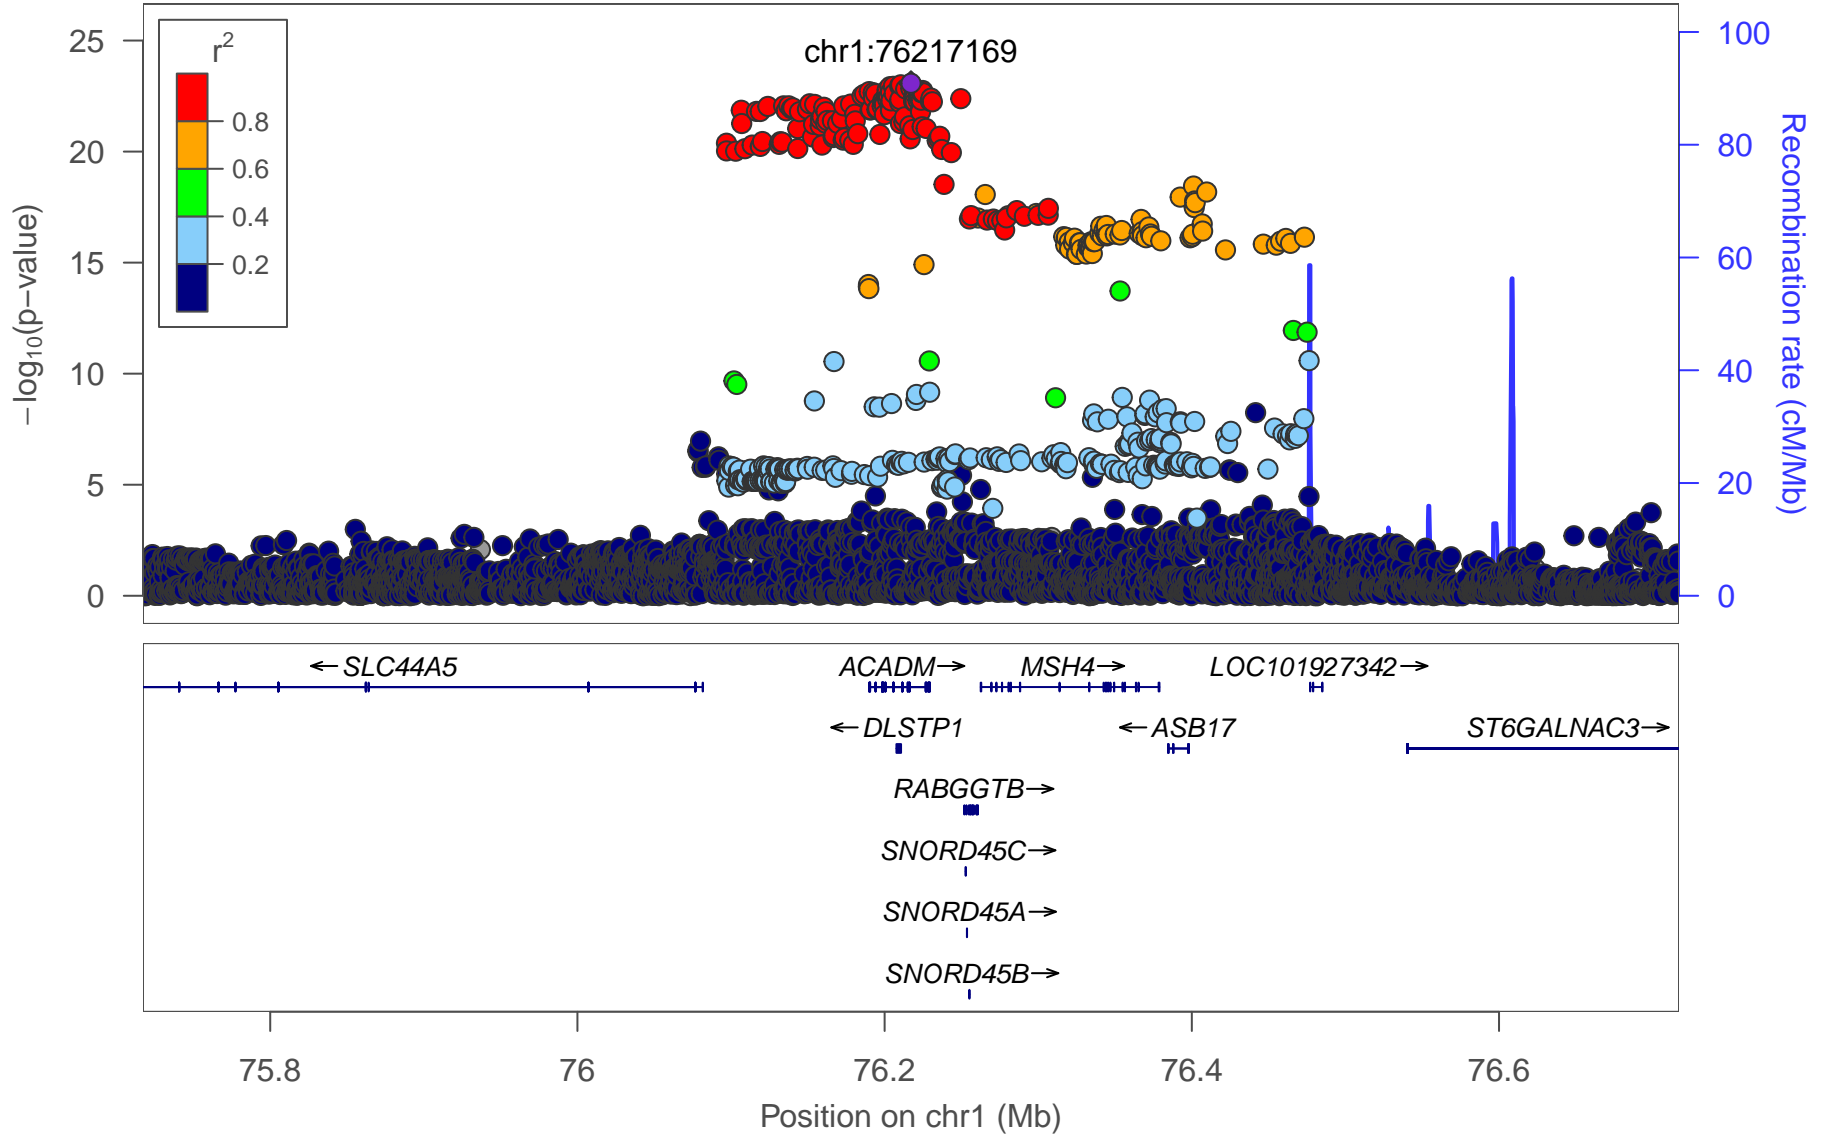

# 1\_12:XL-HDL-FC

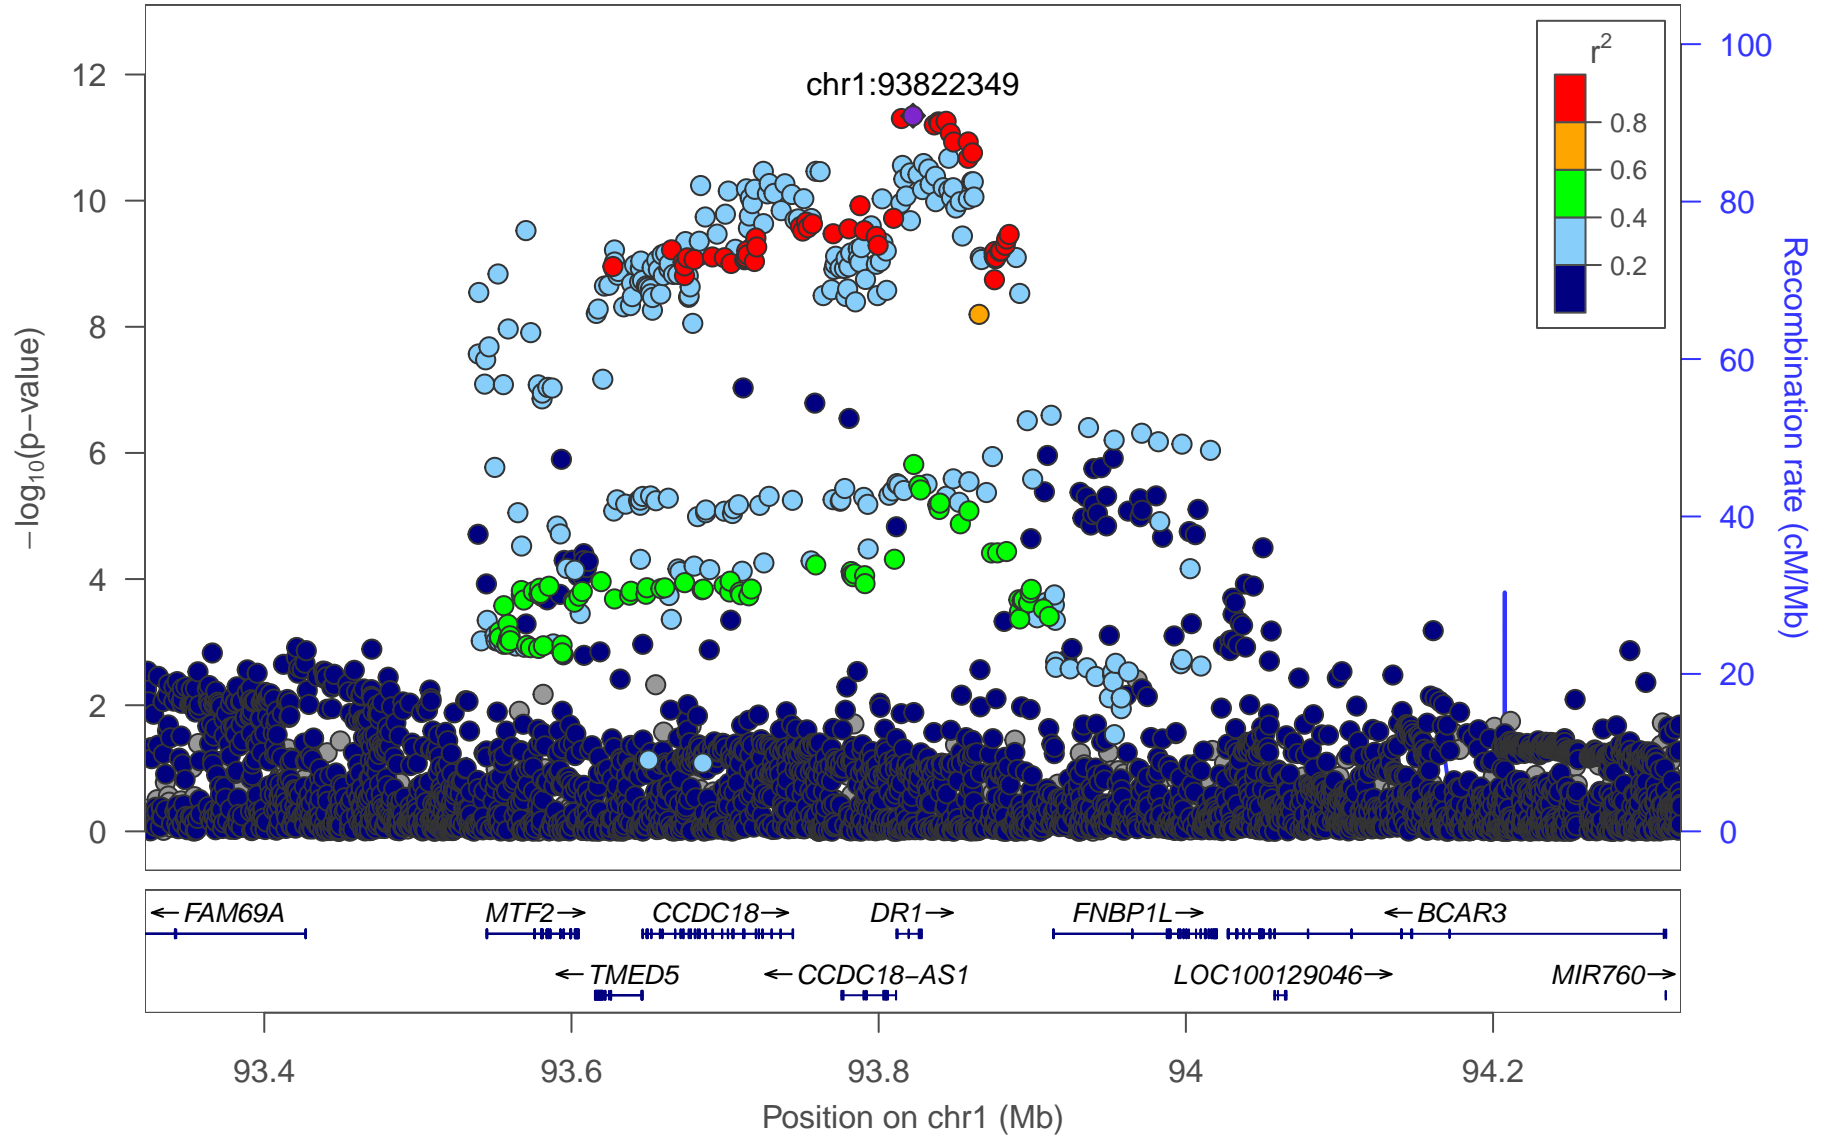

# 1\_13:Leu

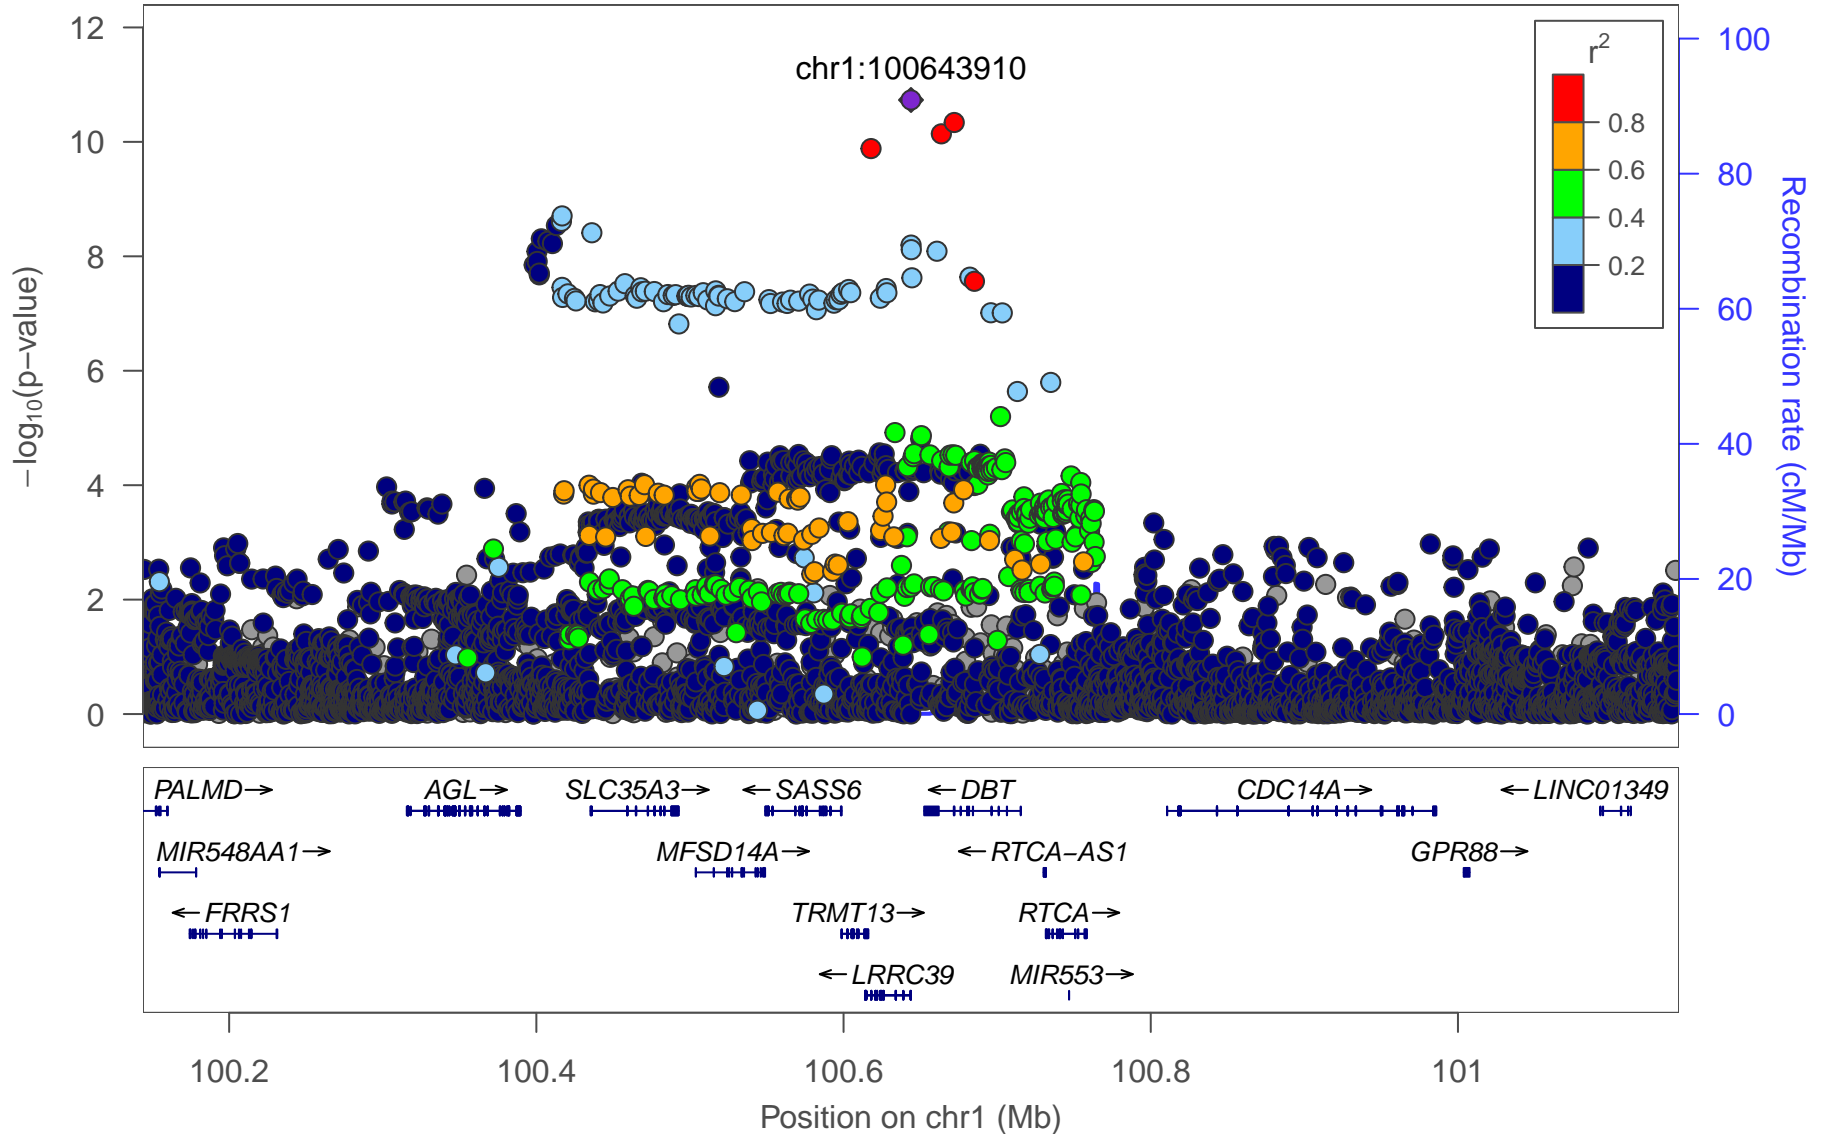

# 1\_14:S-LDL-CE

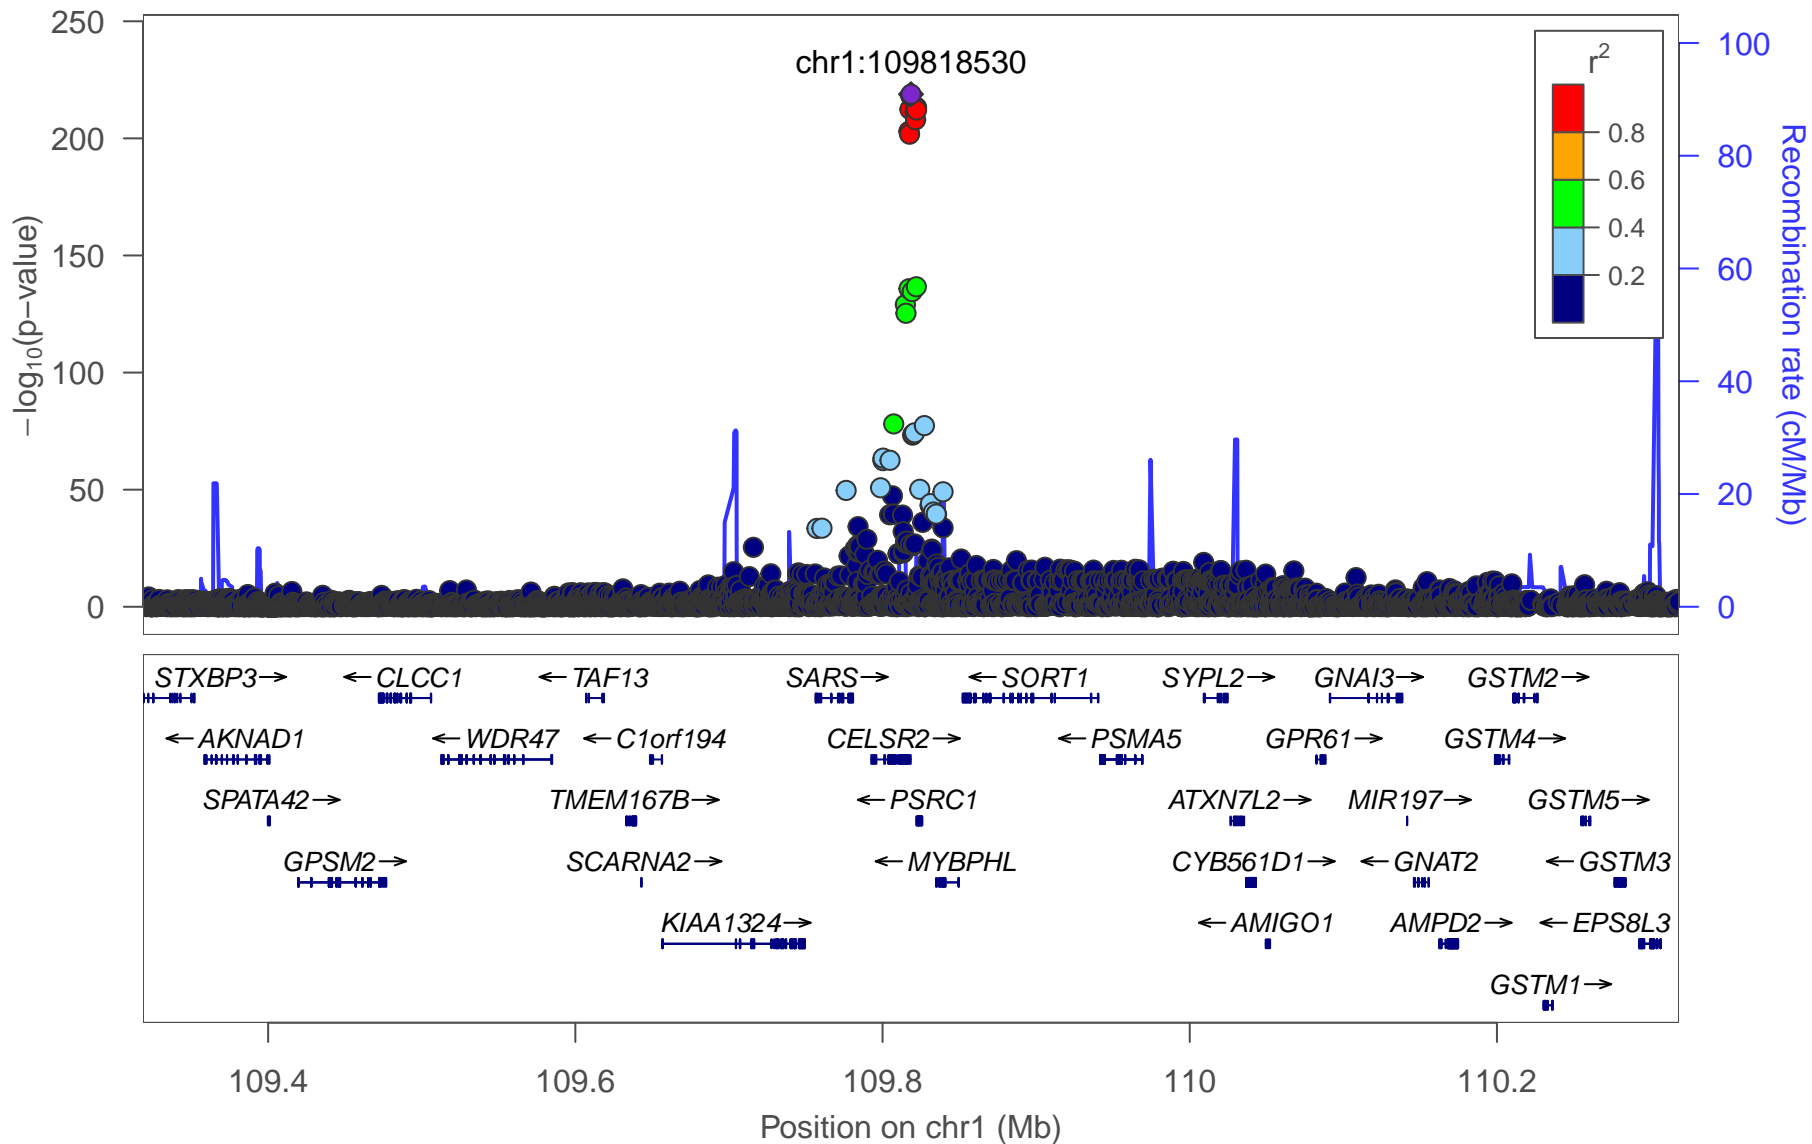

# 1\_15:Gly

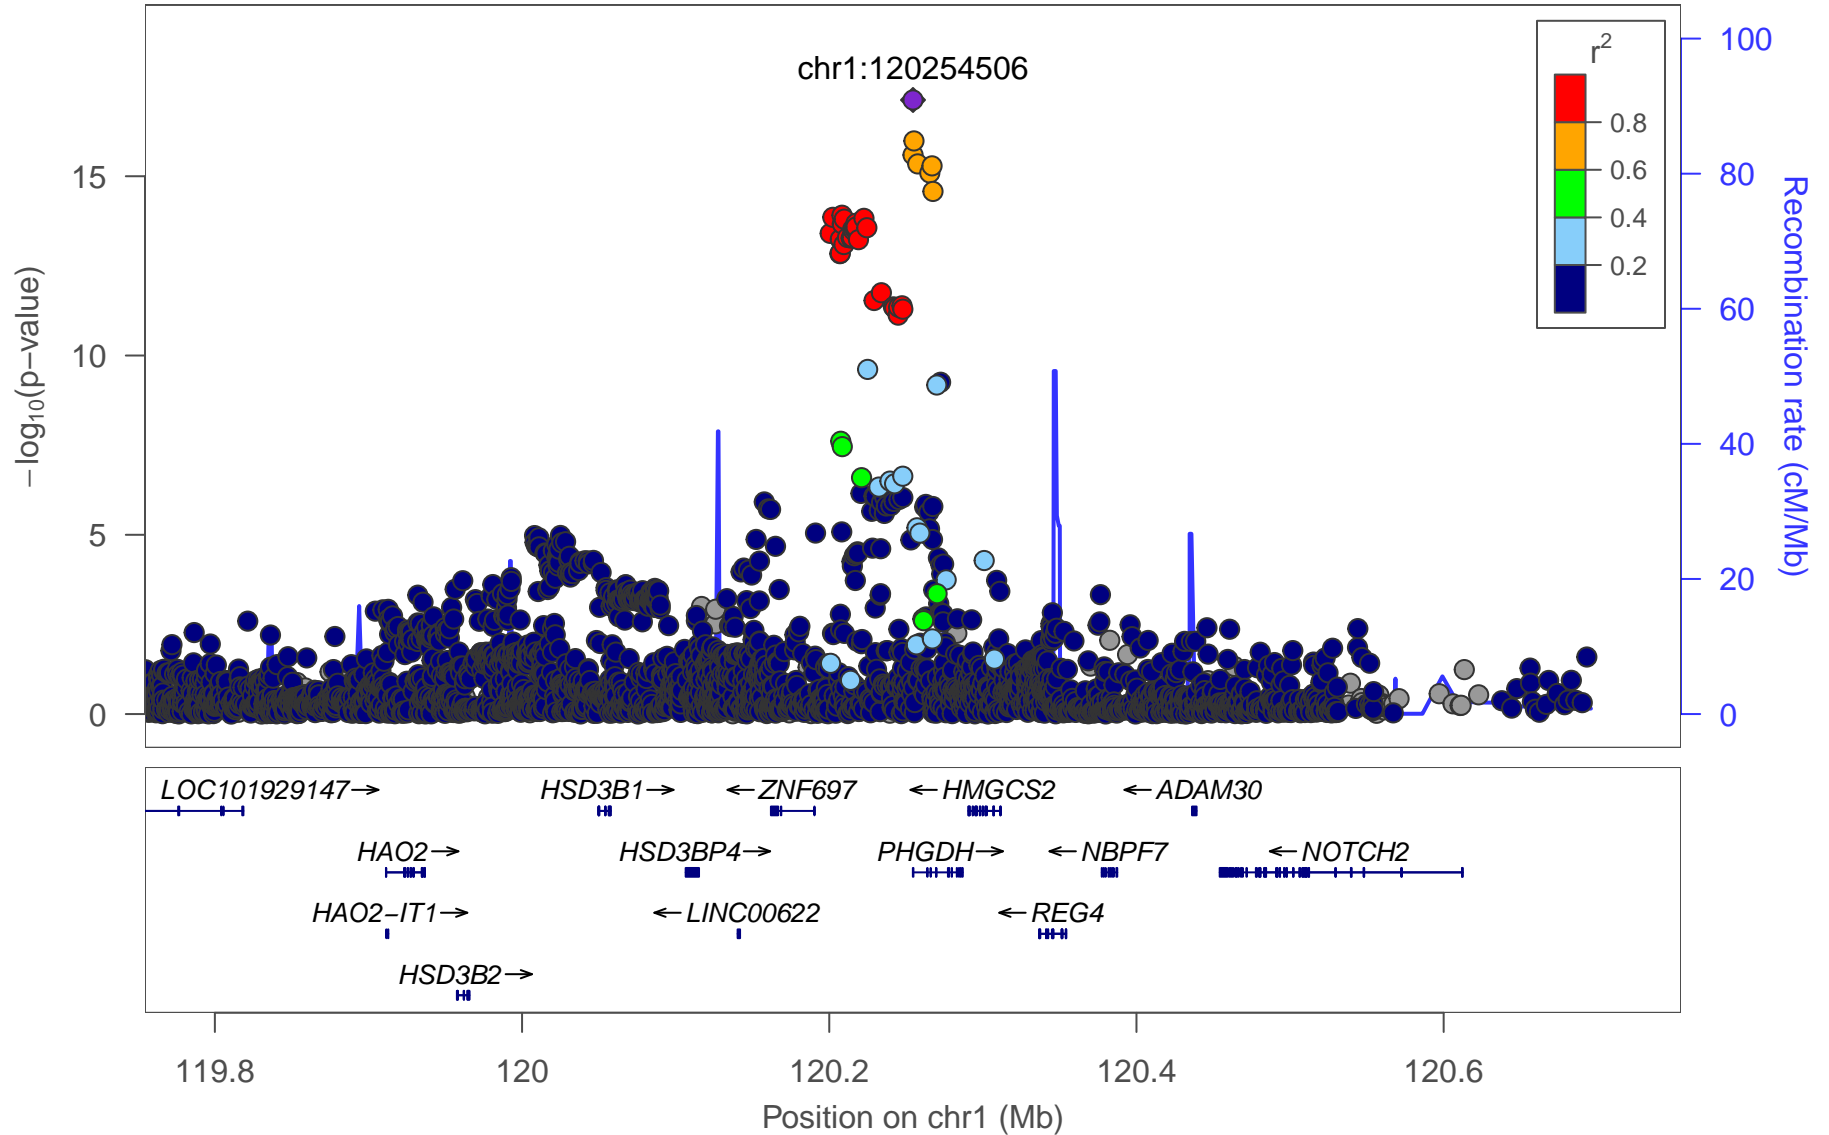





# 1\_17:Alb

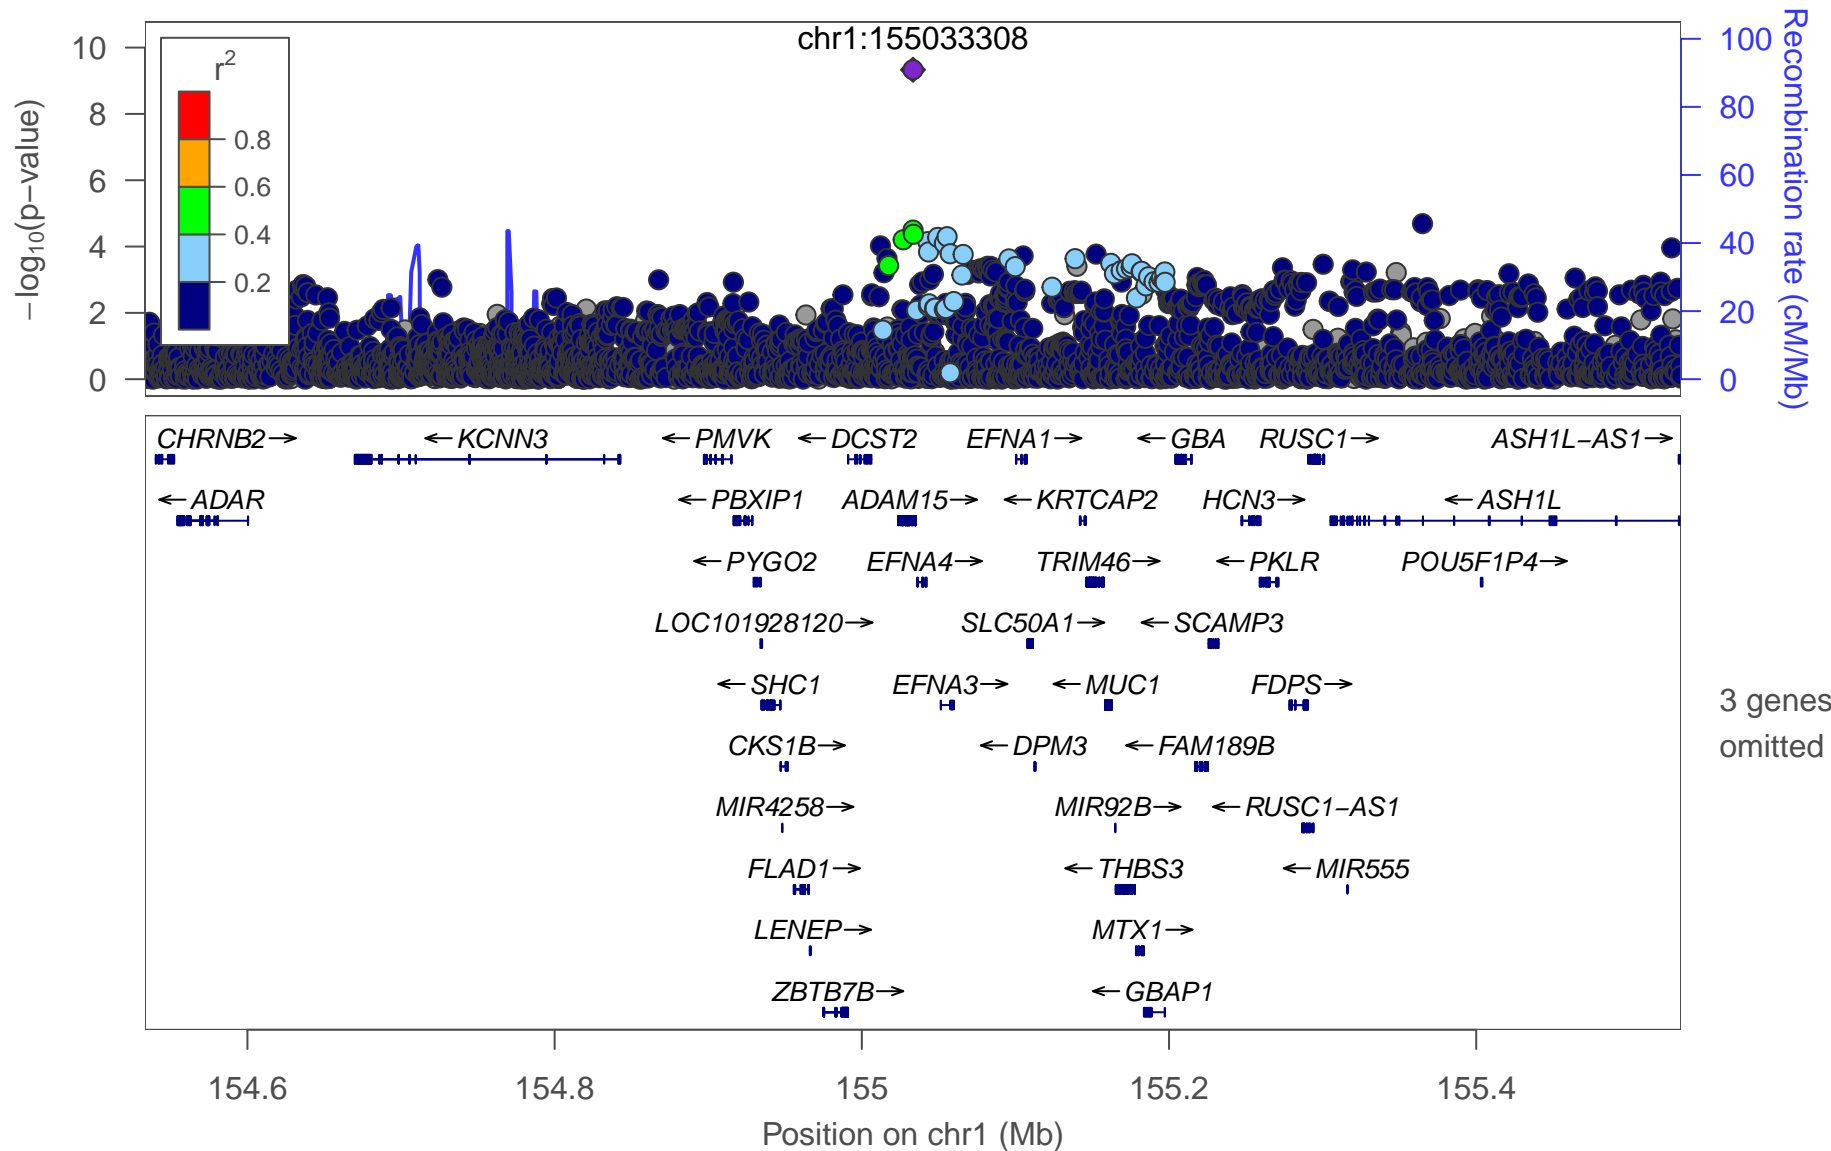

# 1\_18:M-HDL-CE

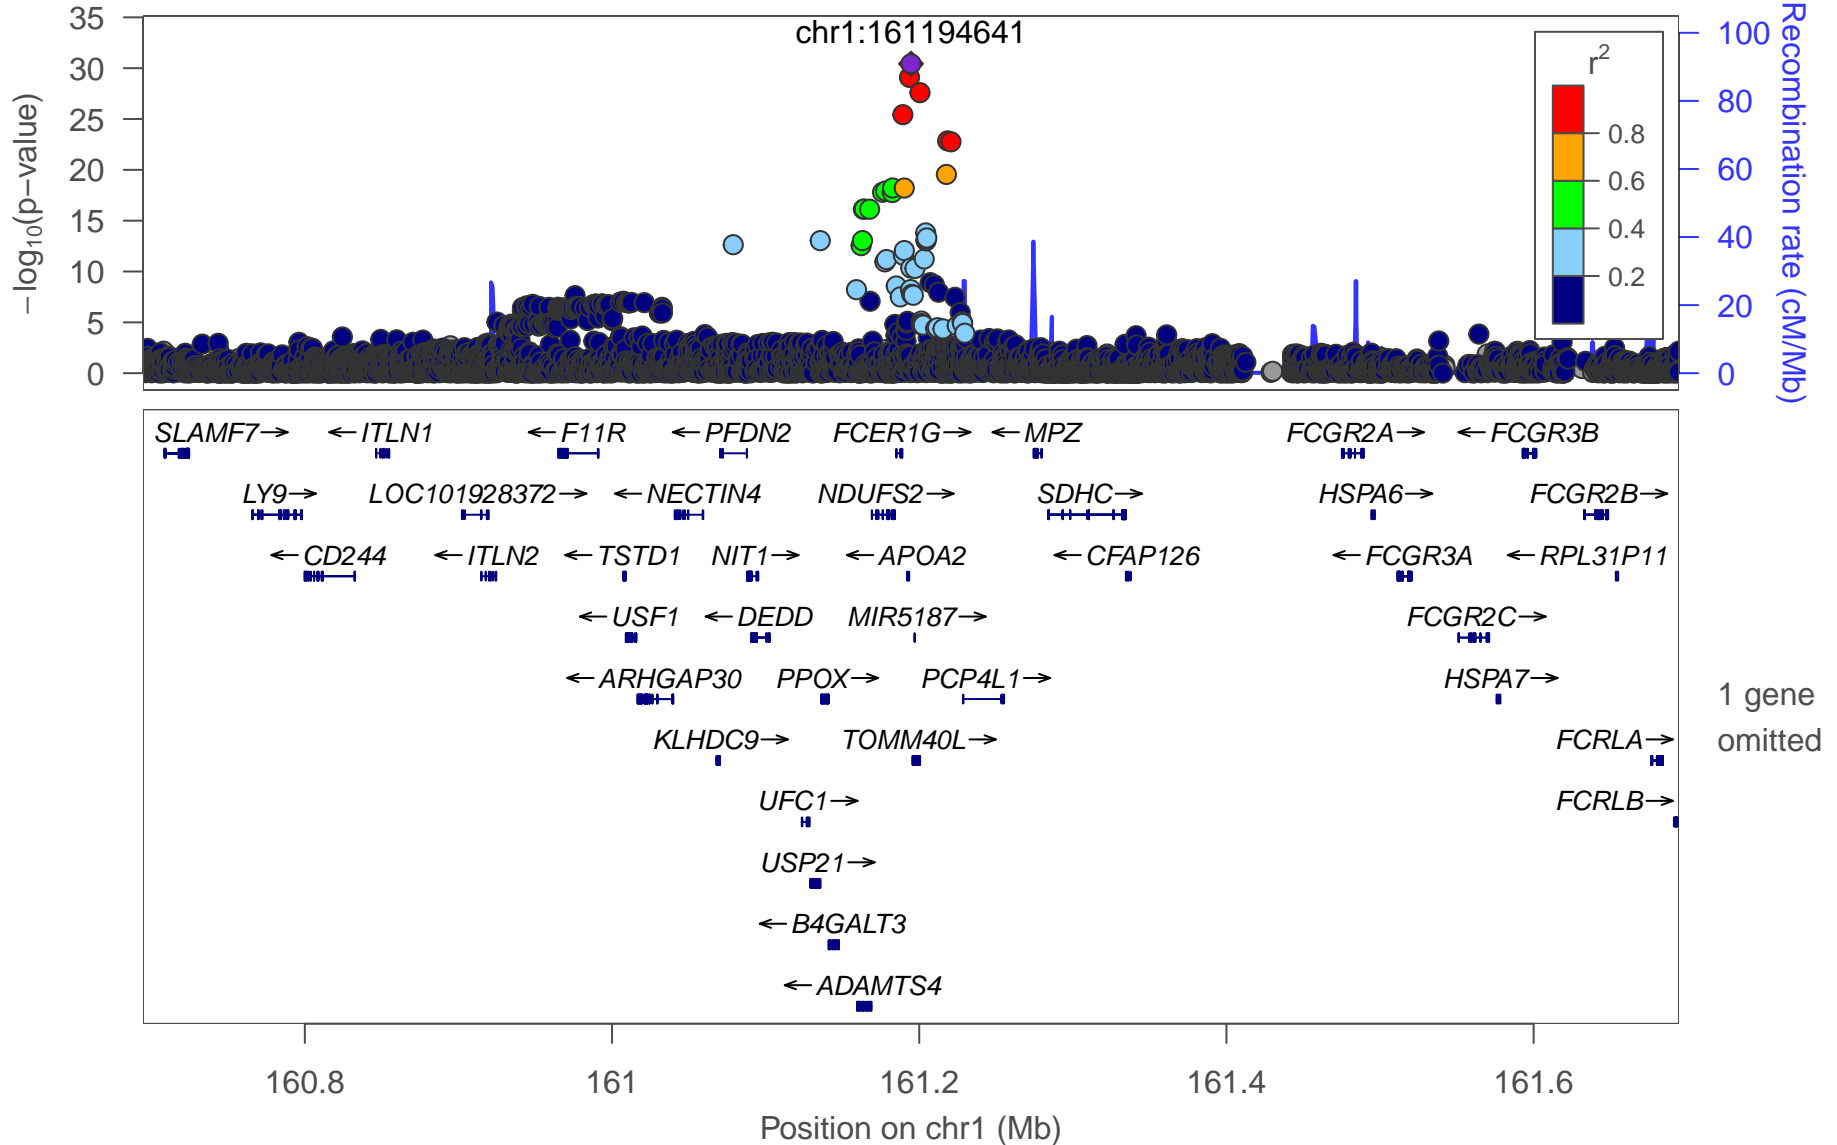

# 1\_19:XL-VLDL-C\_percent

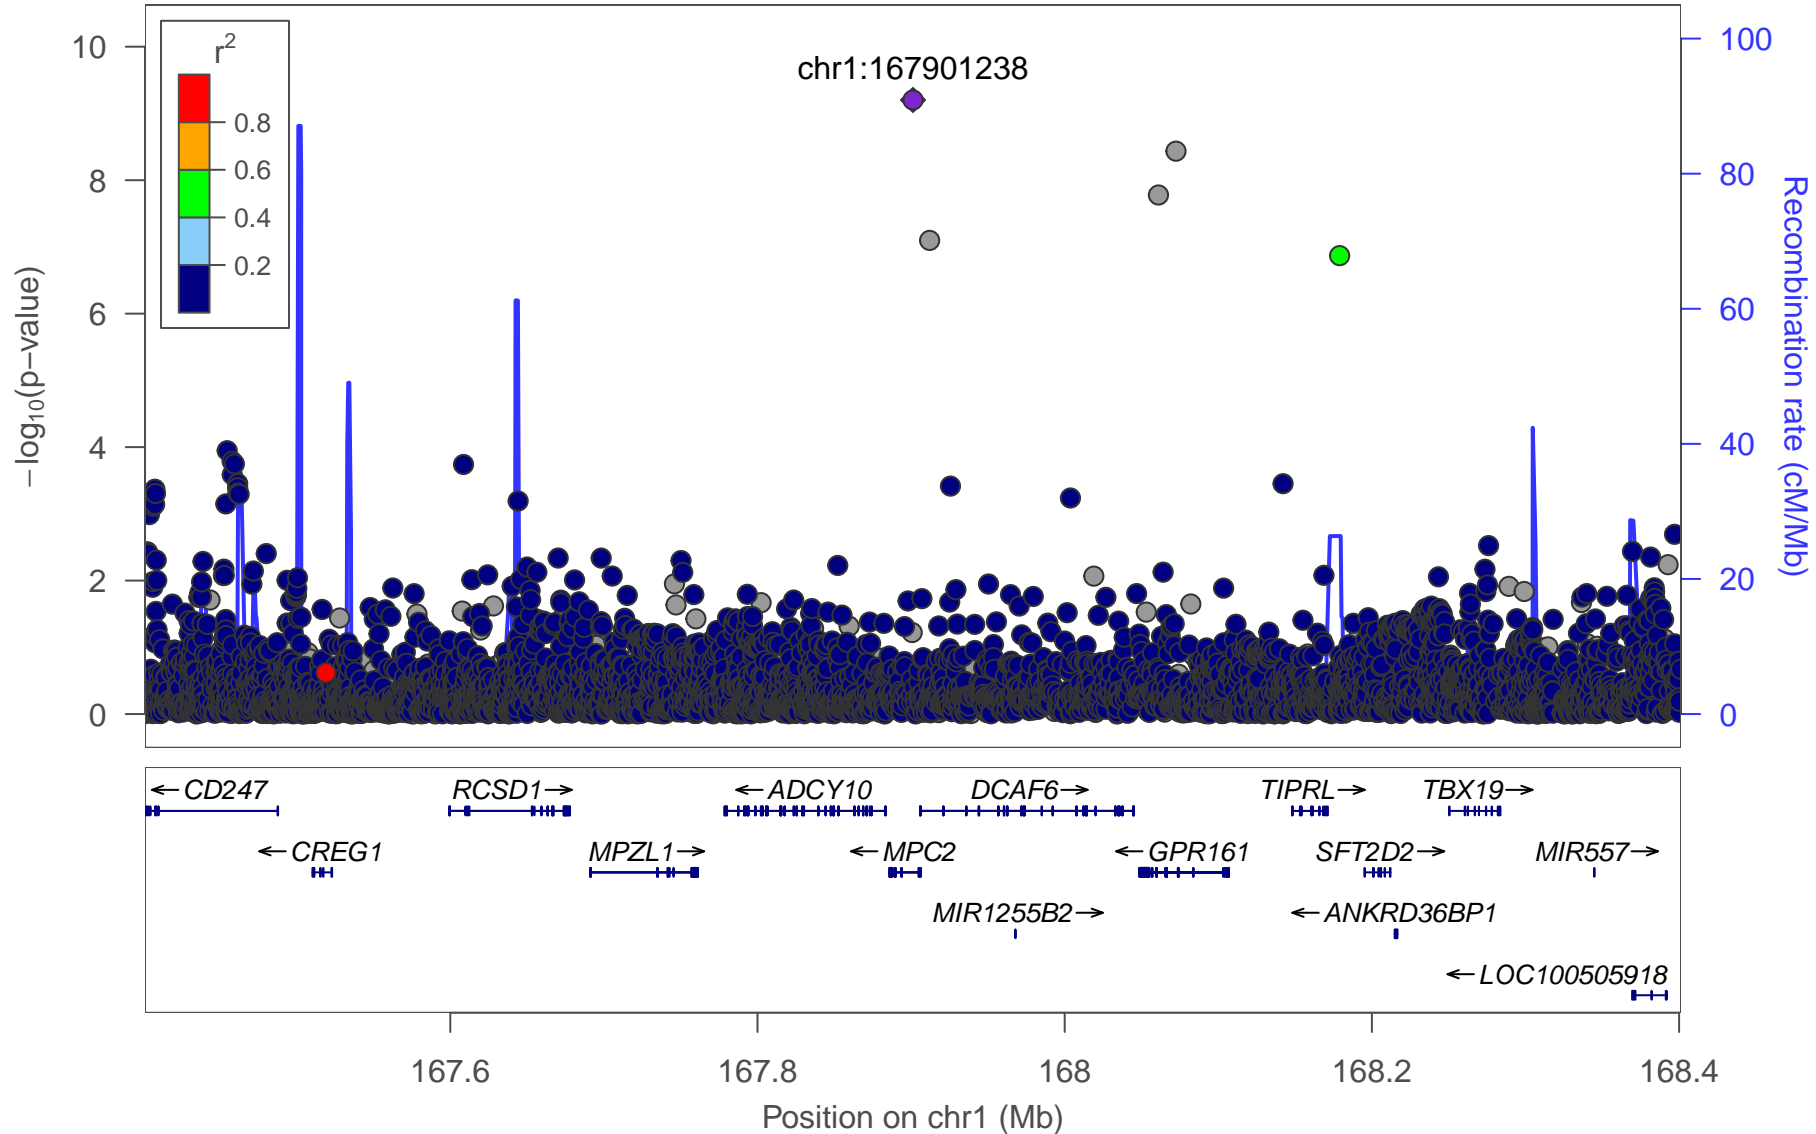

# 1\_20:HDL-D

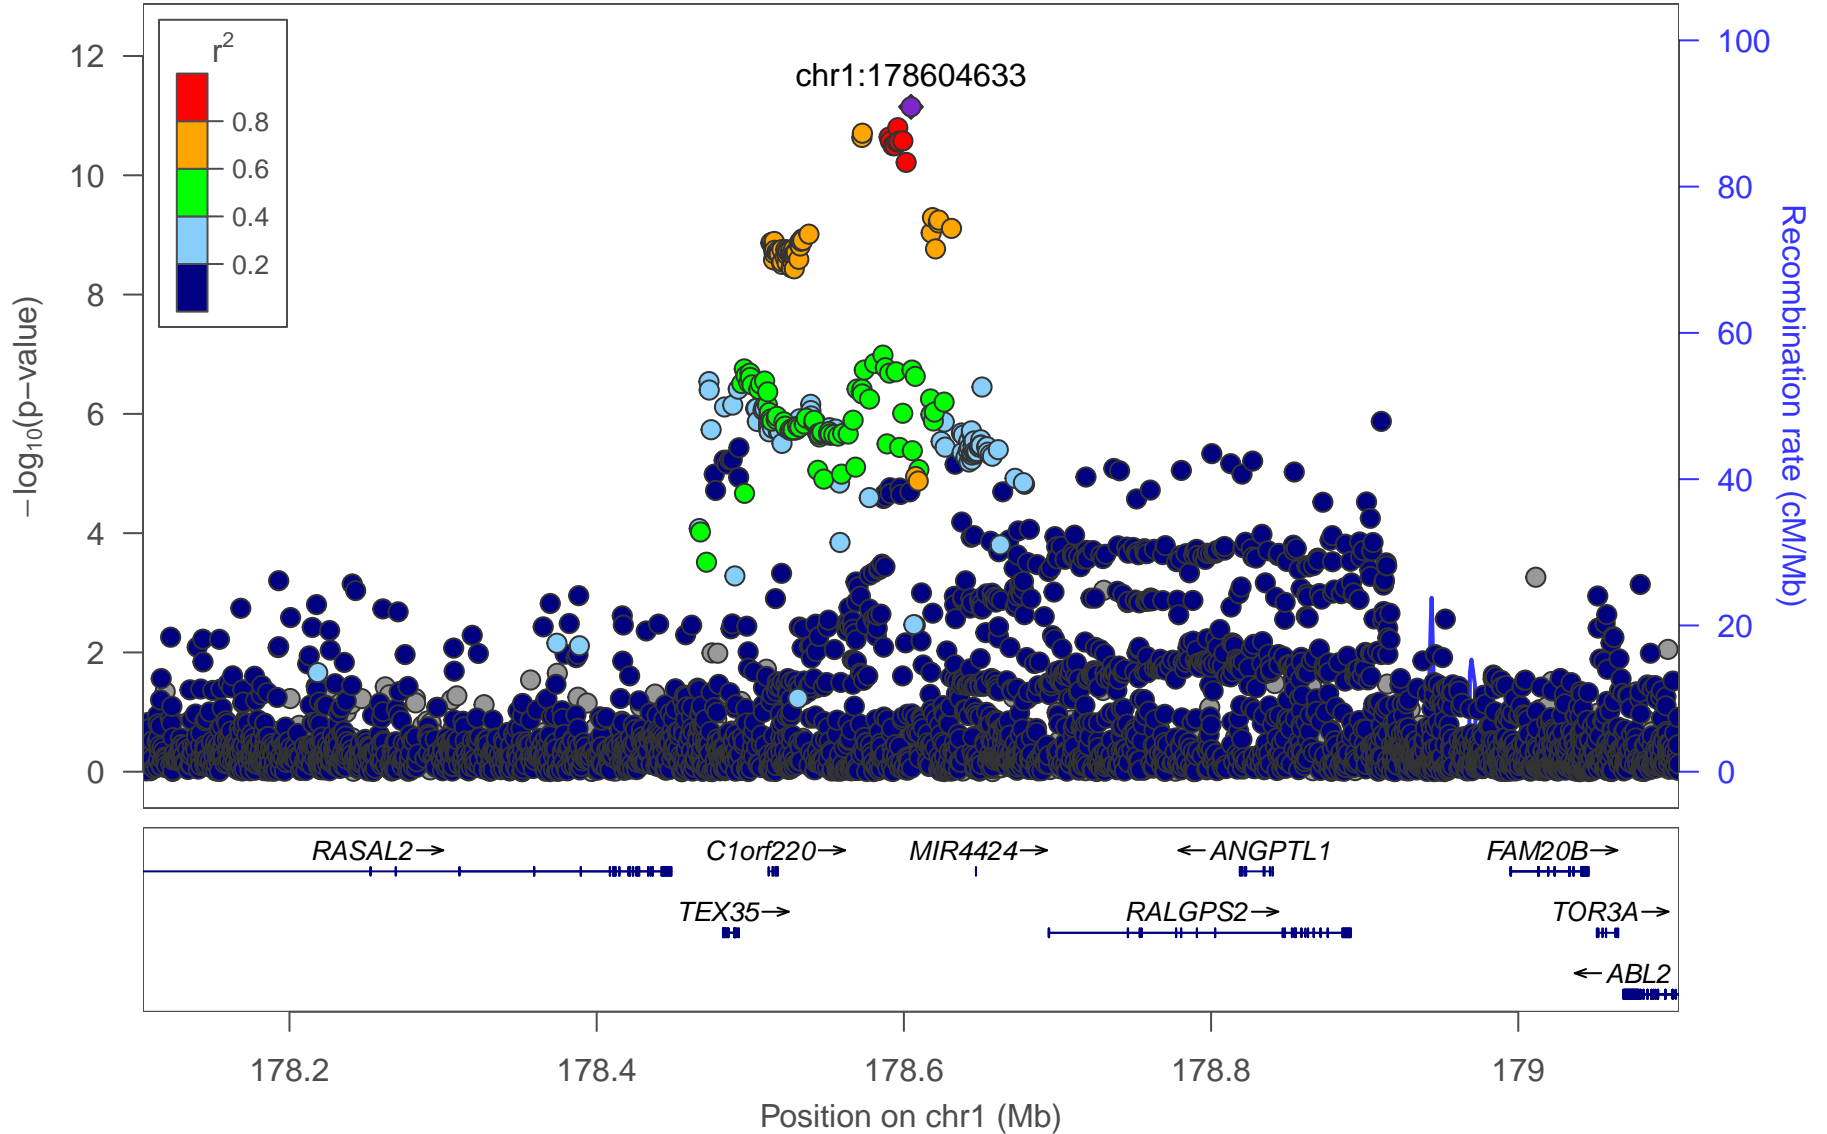

# 1\_21:HDL-D

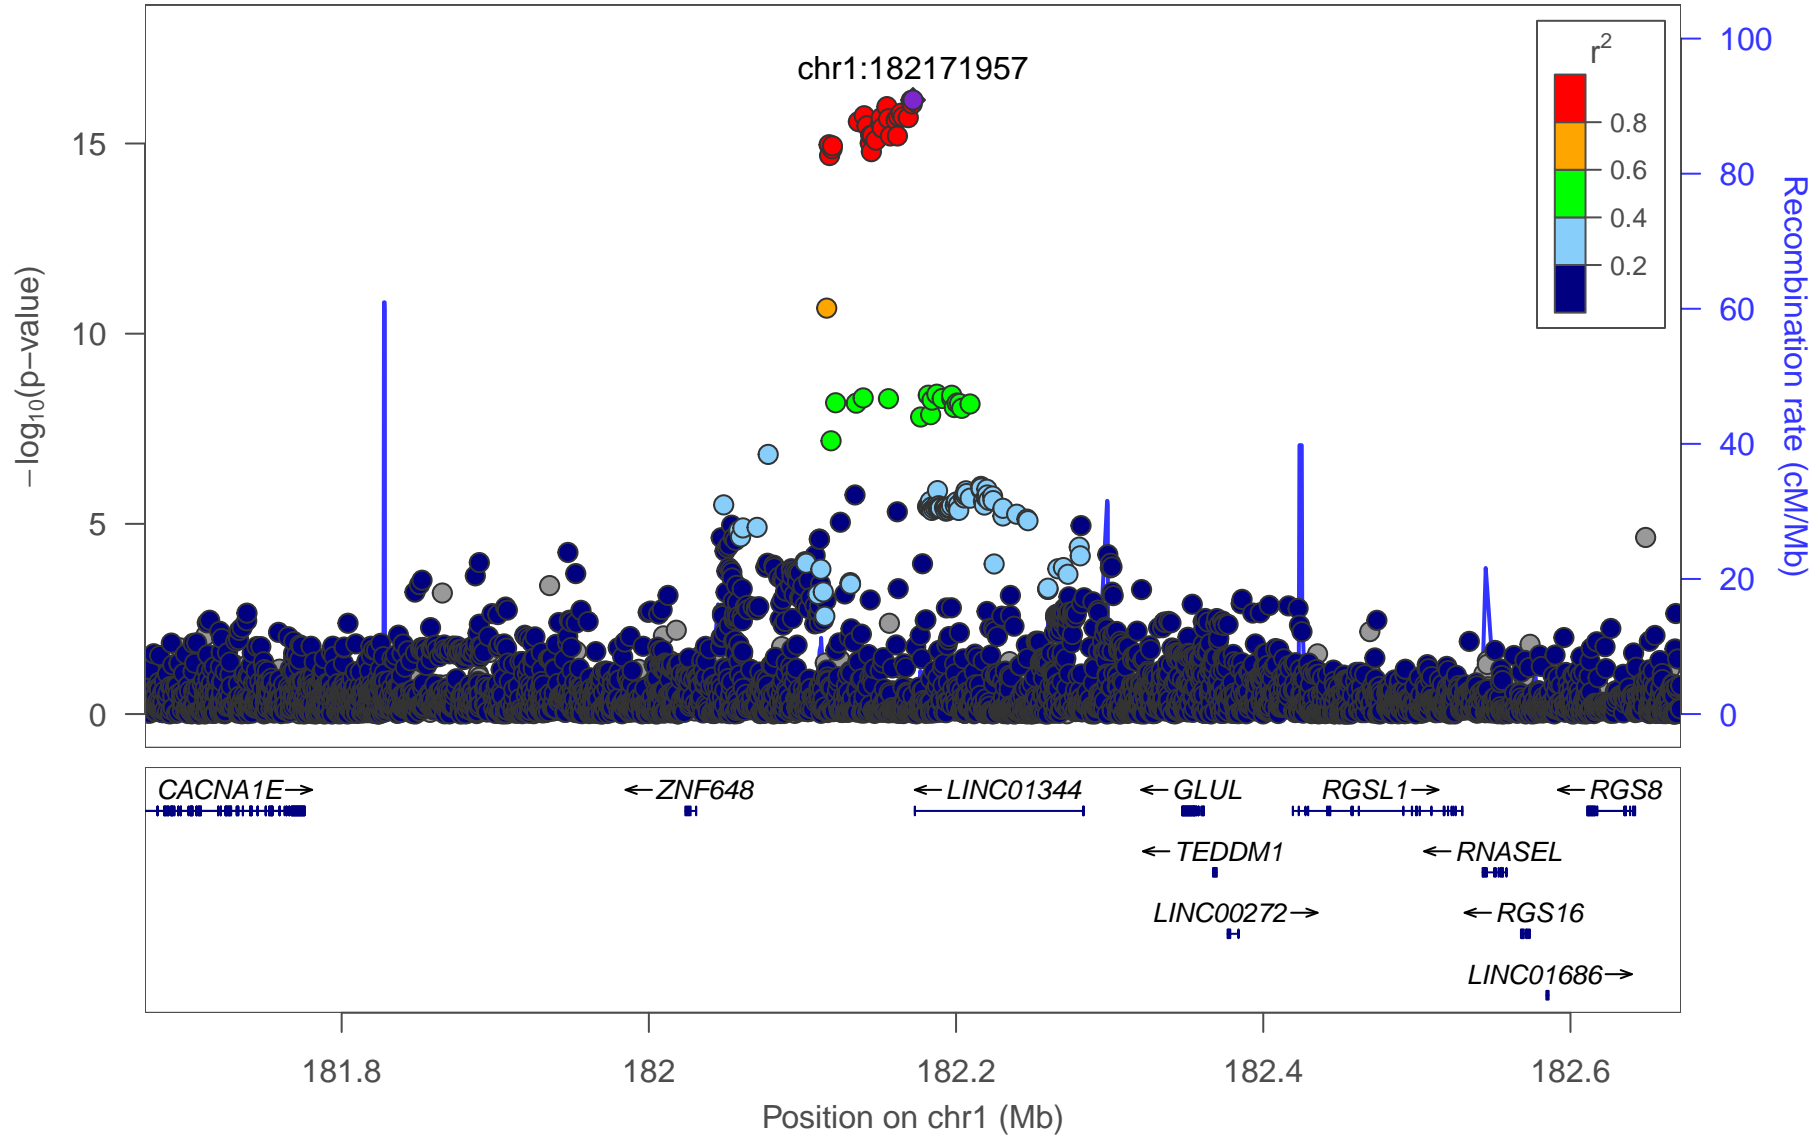

# 1\_22:GlycA

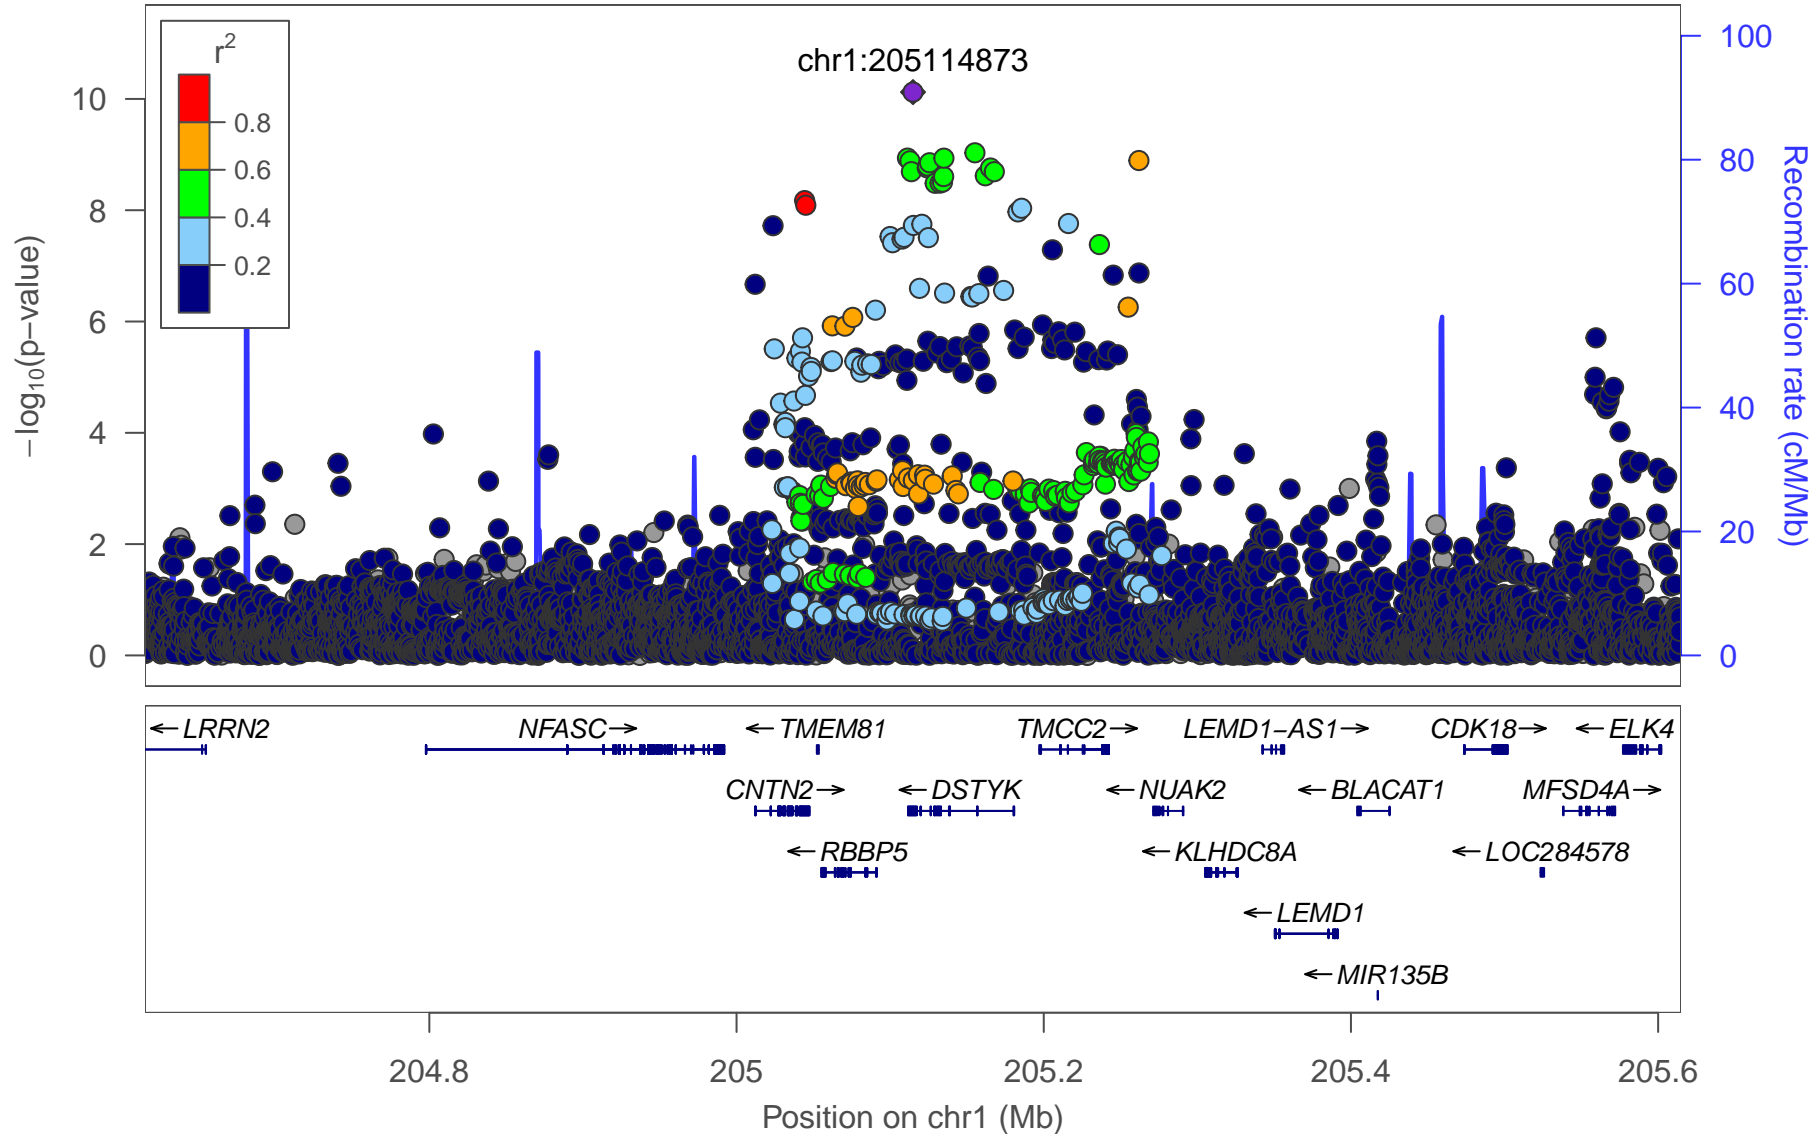

# 1\_23:Ala

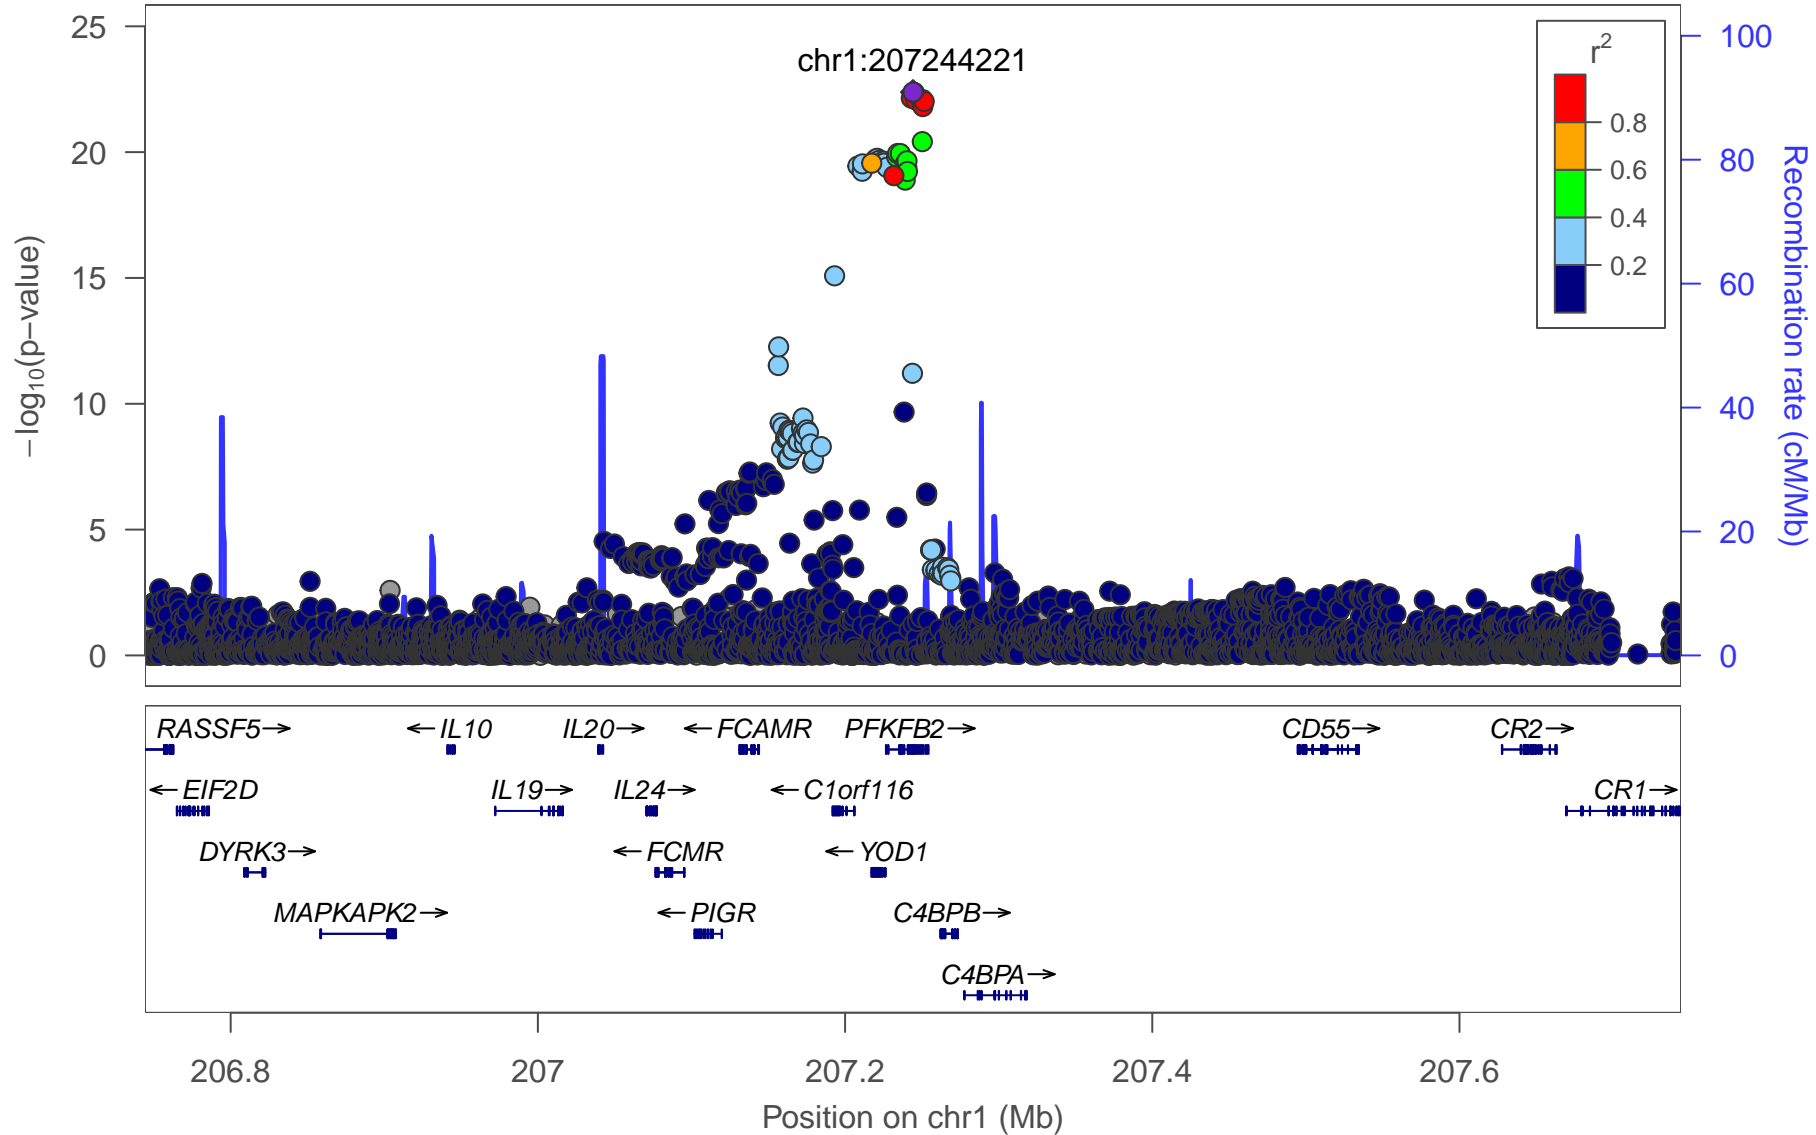

# 1\_24:Gln

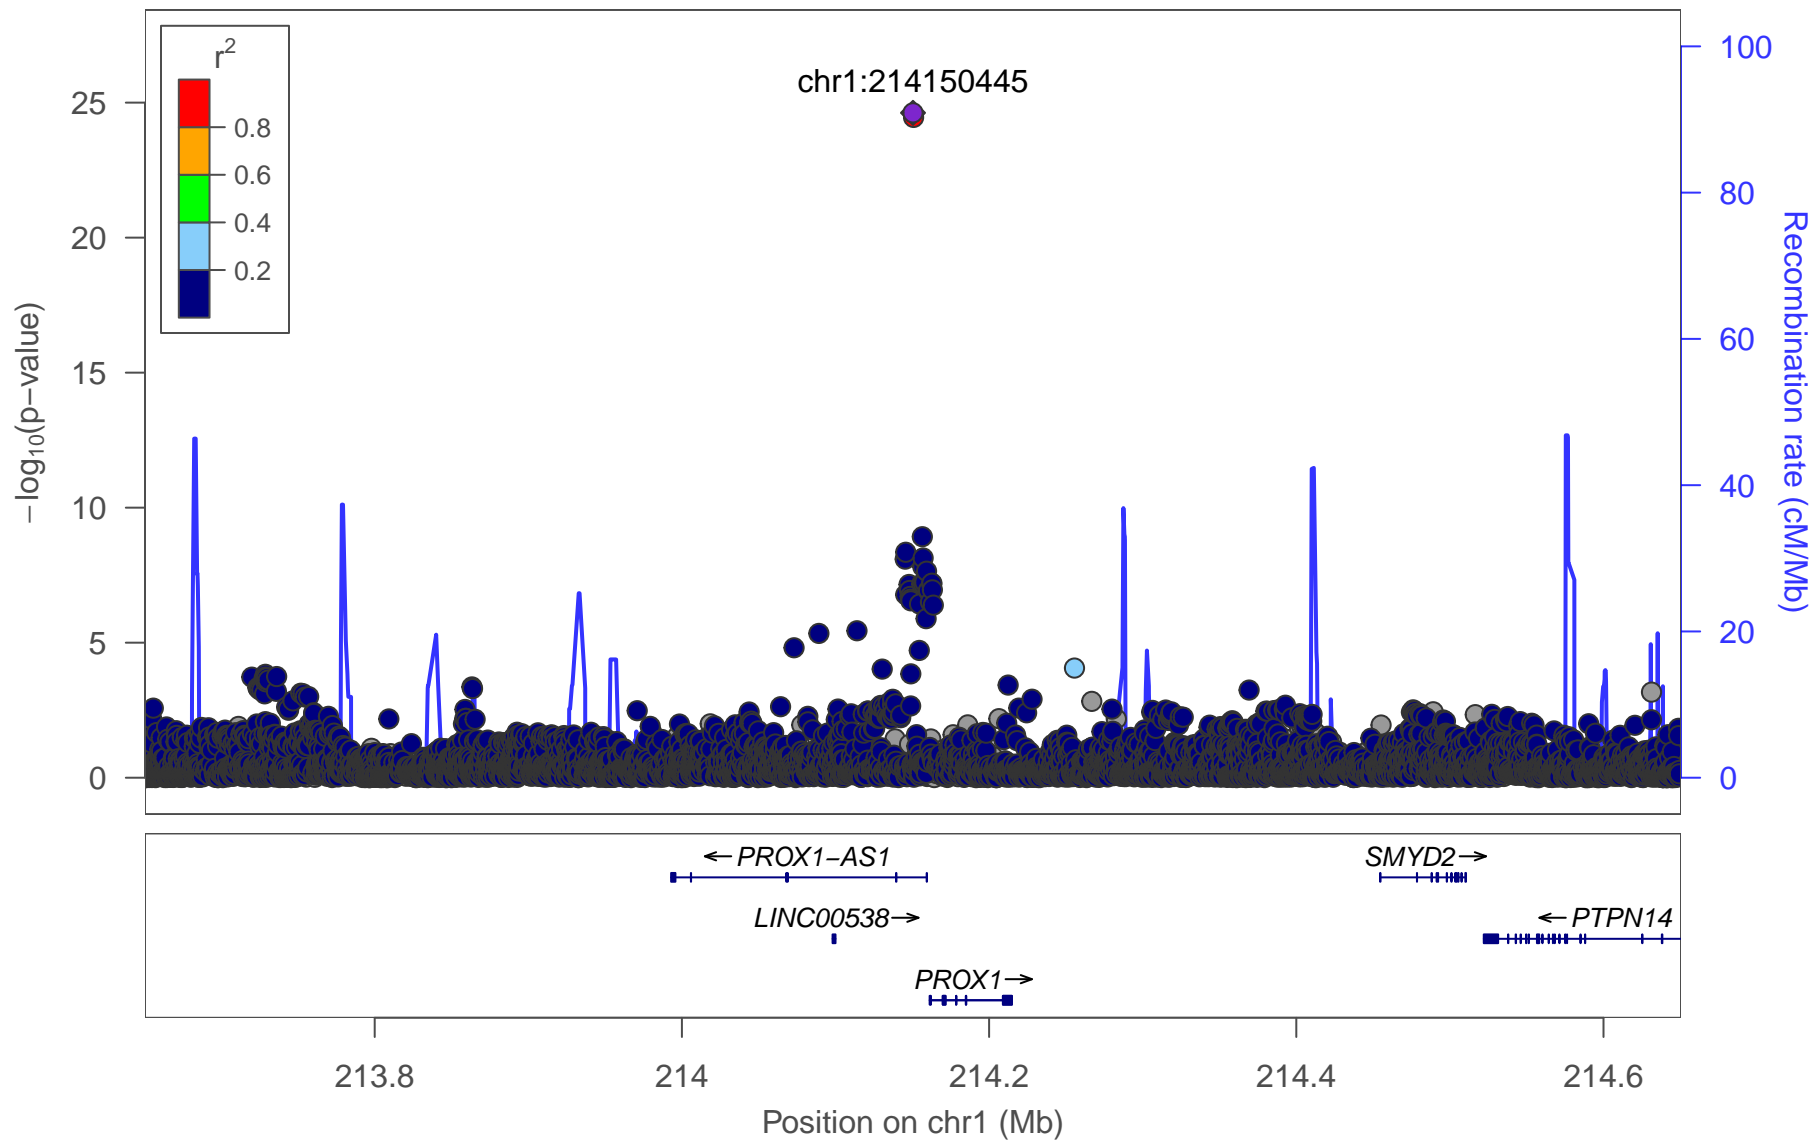



# 1\_25:TGbyPG

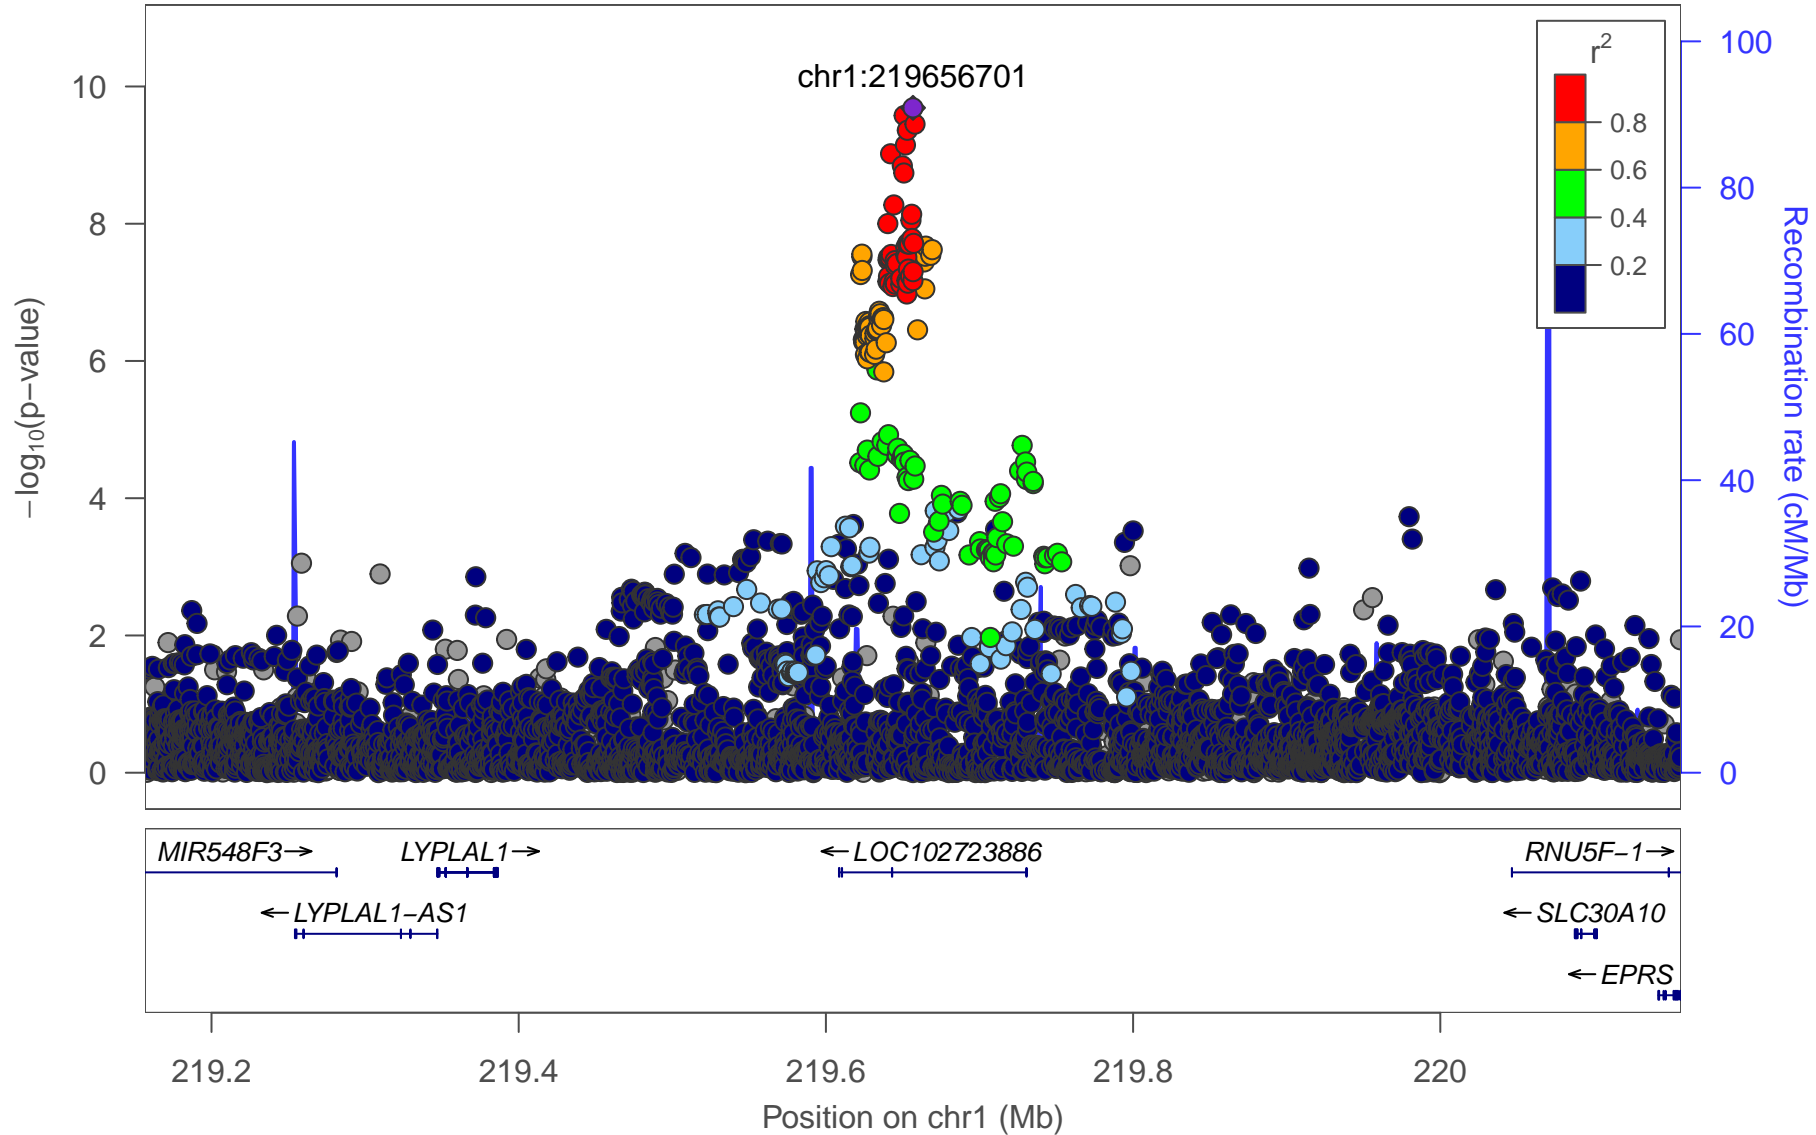

# 1\_26:HDL-C

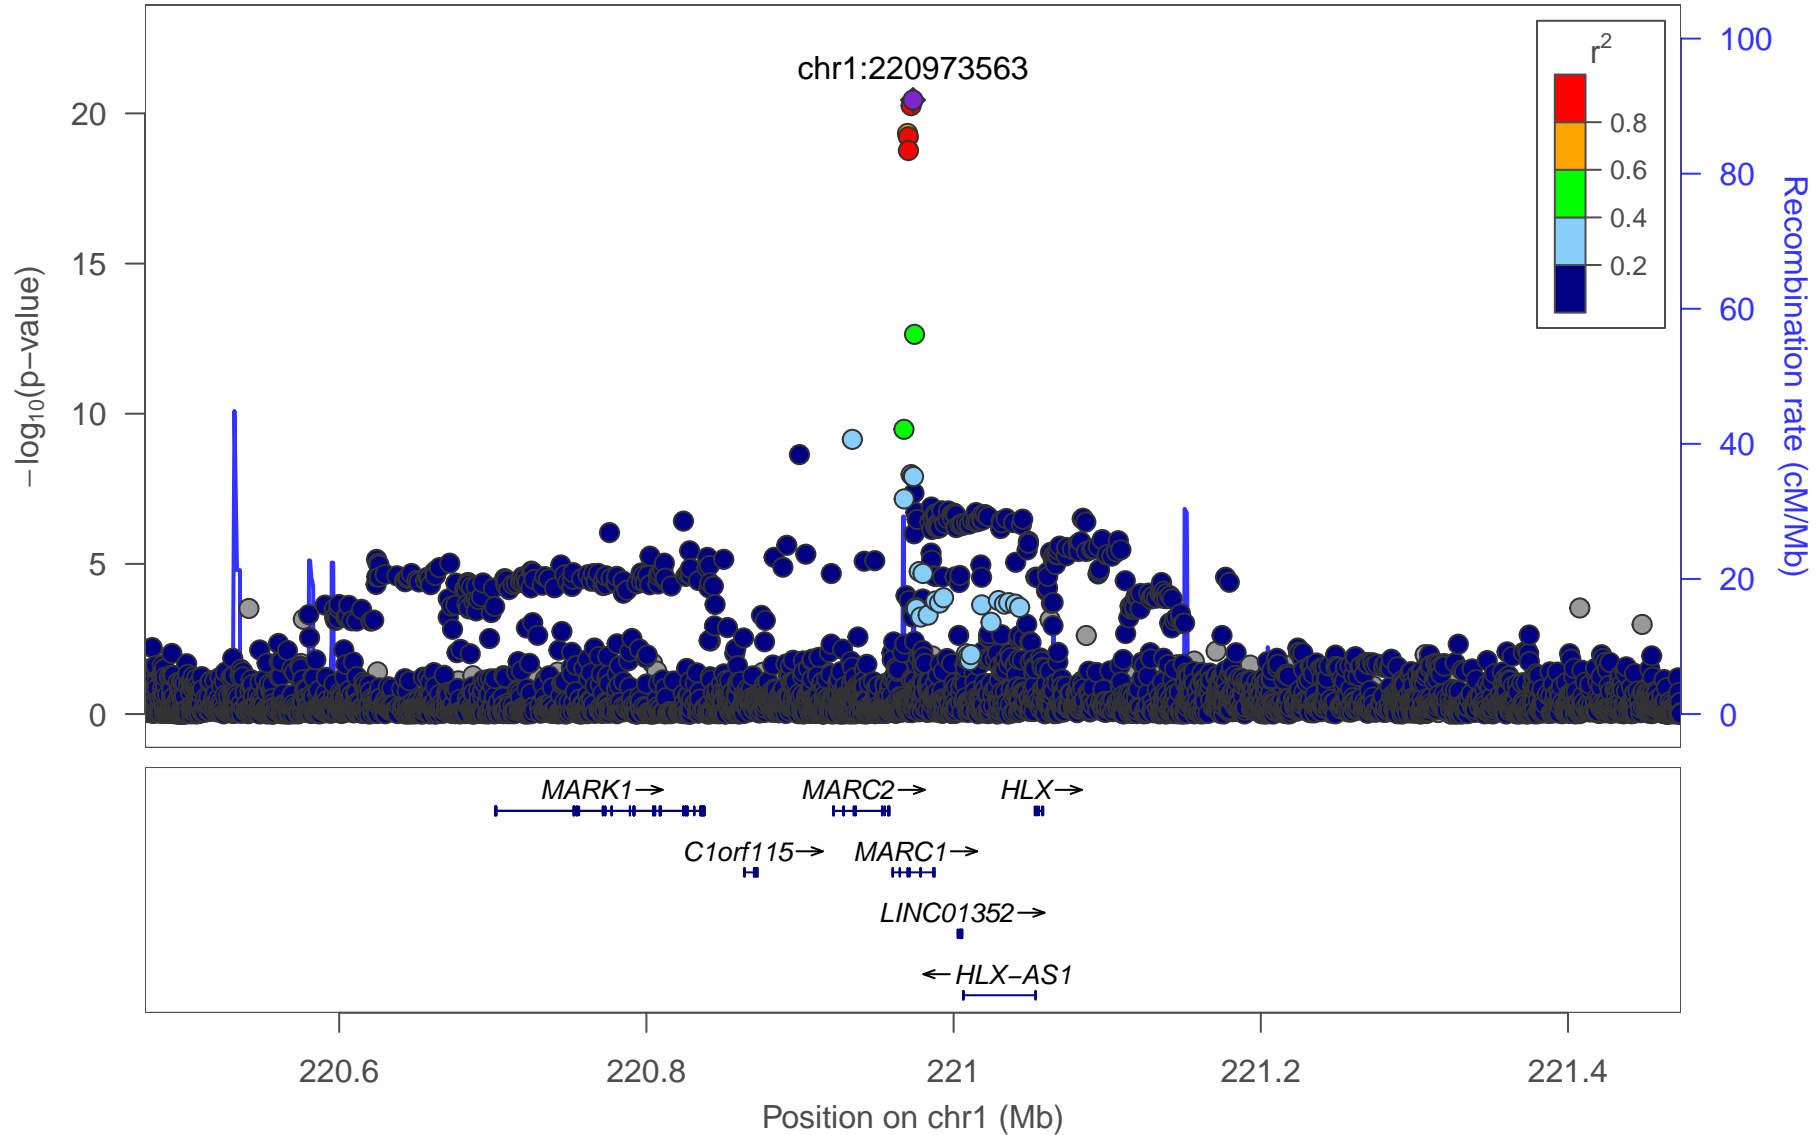

# 1\_27:TGbyPG

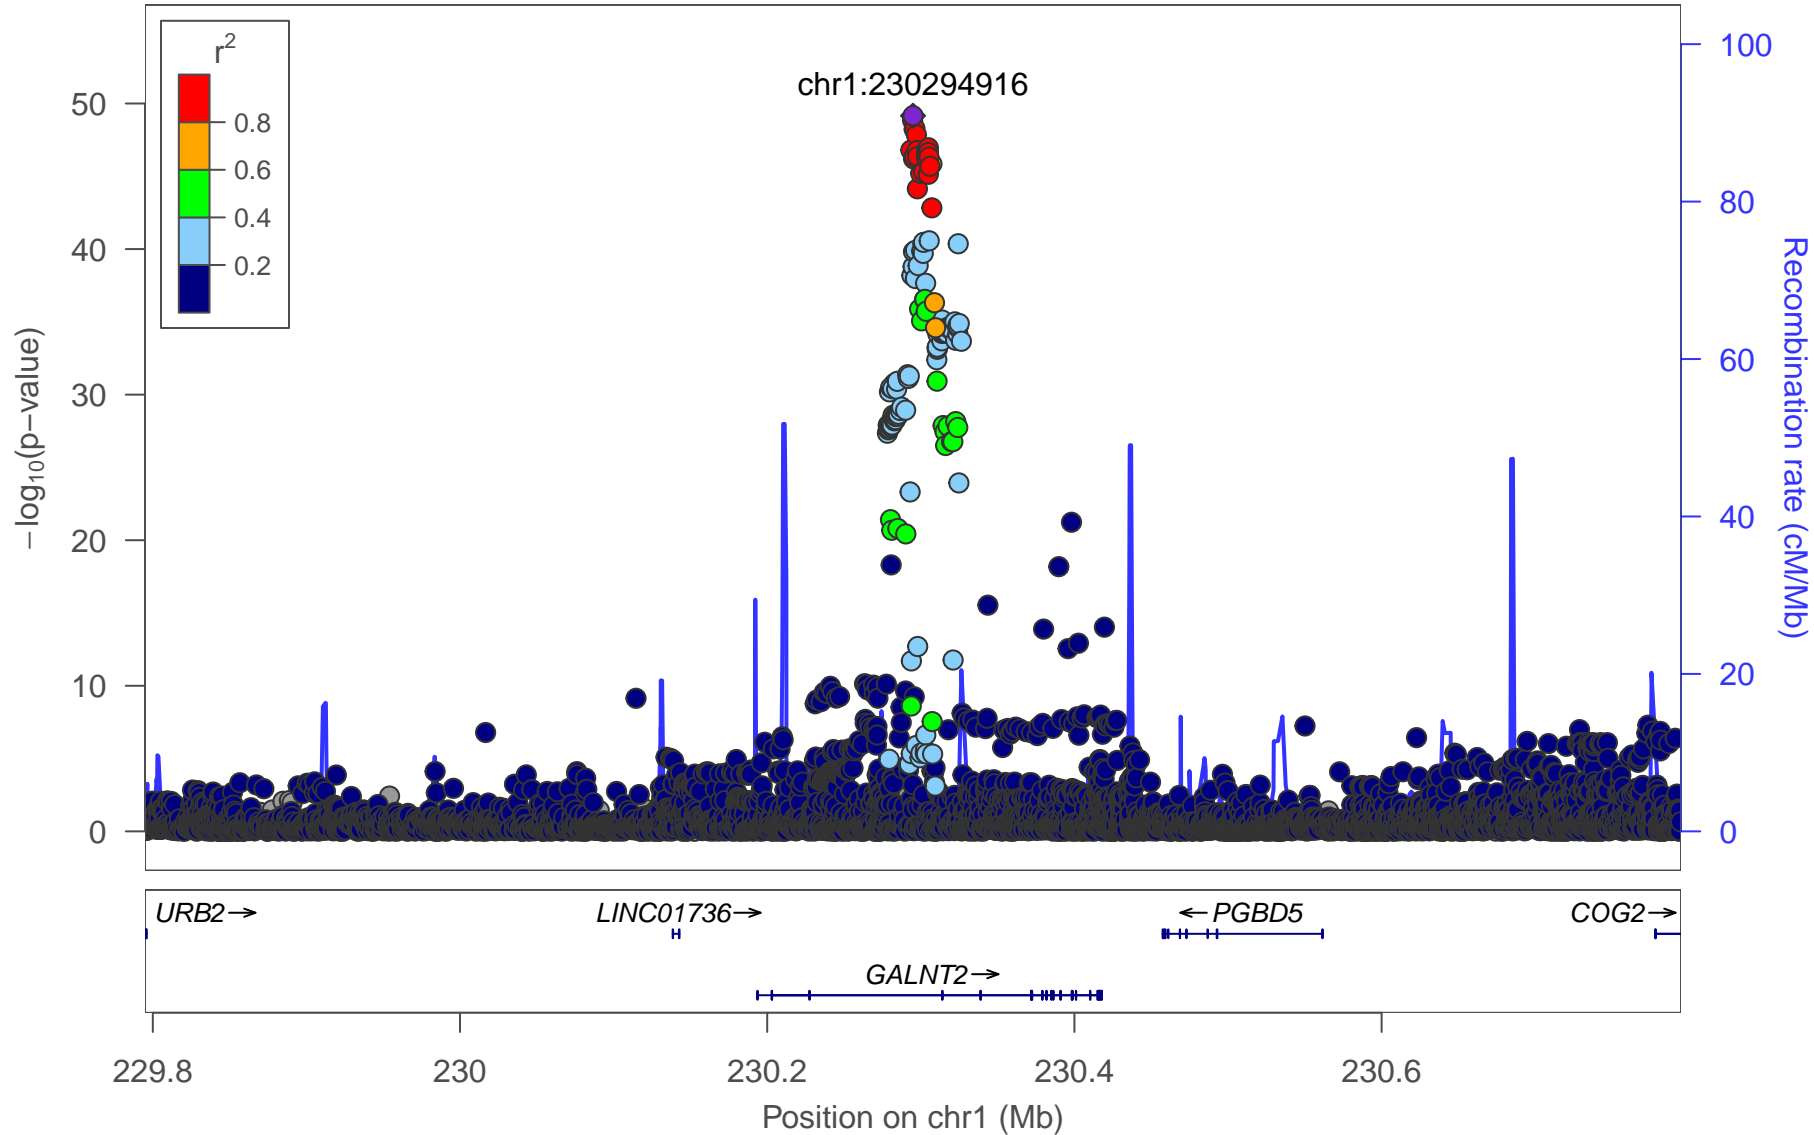

# 1\_28:M-LDL-FC

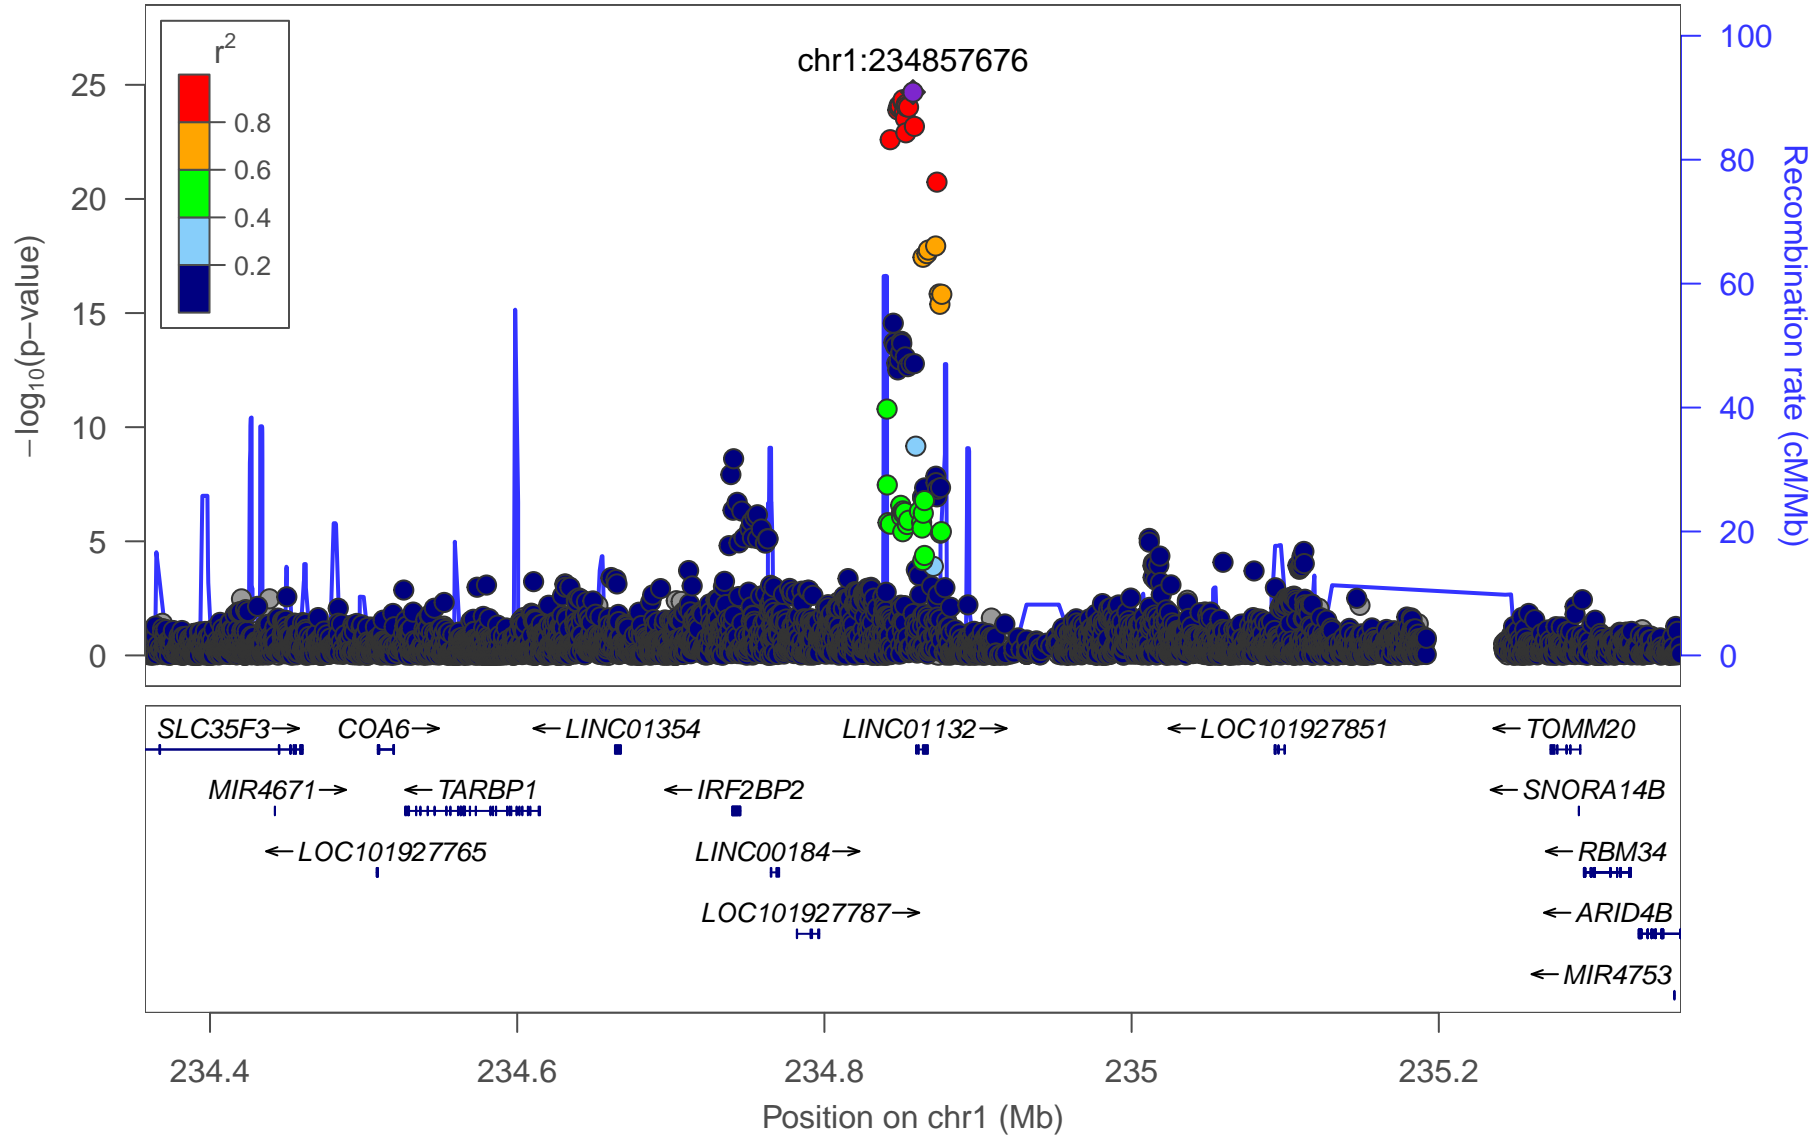

# 2\_1:L-LDL-PL\_percent

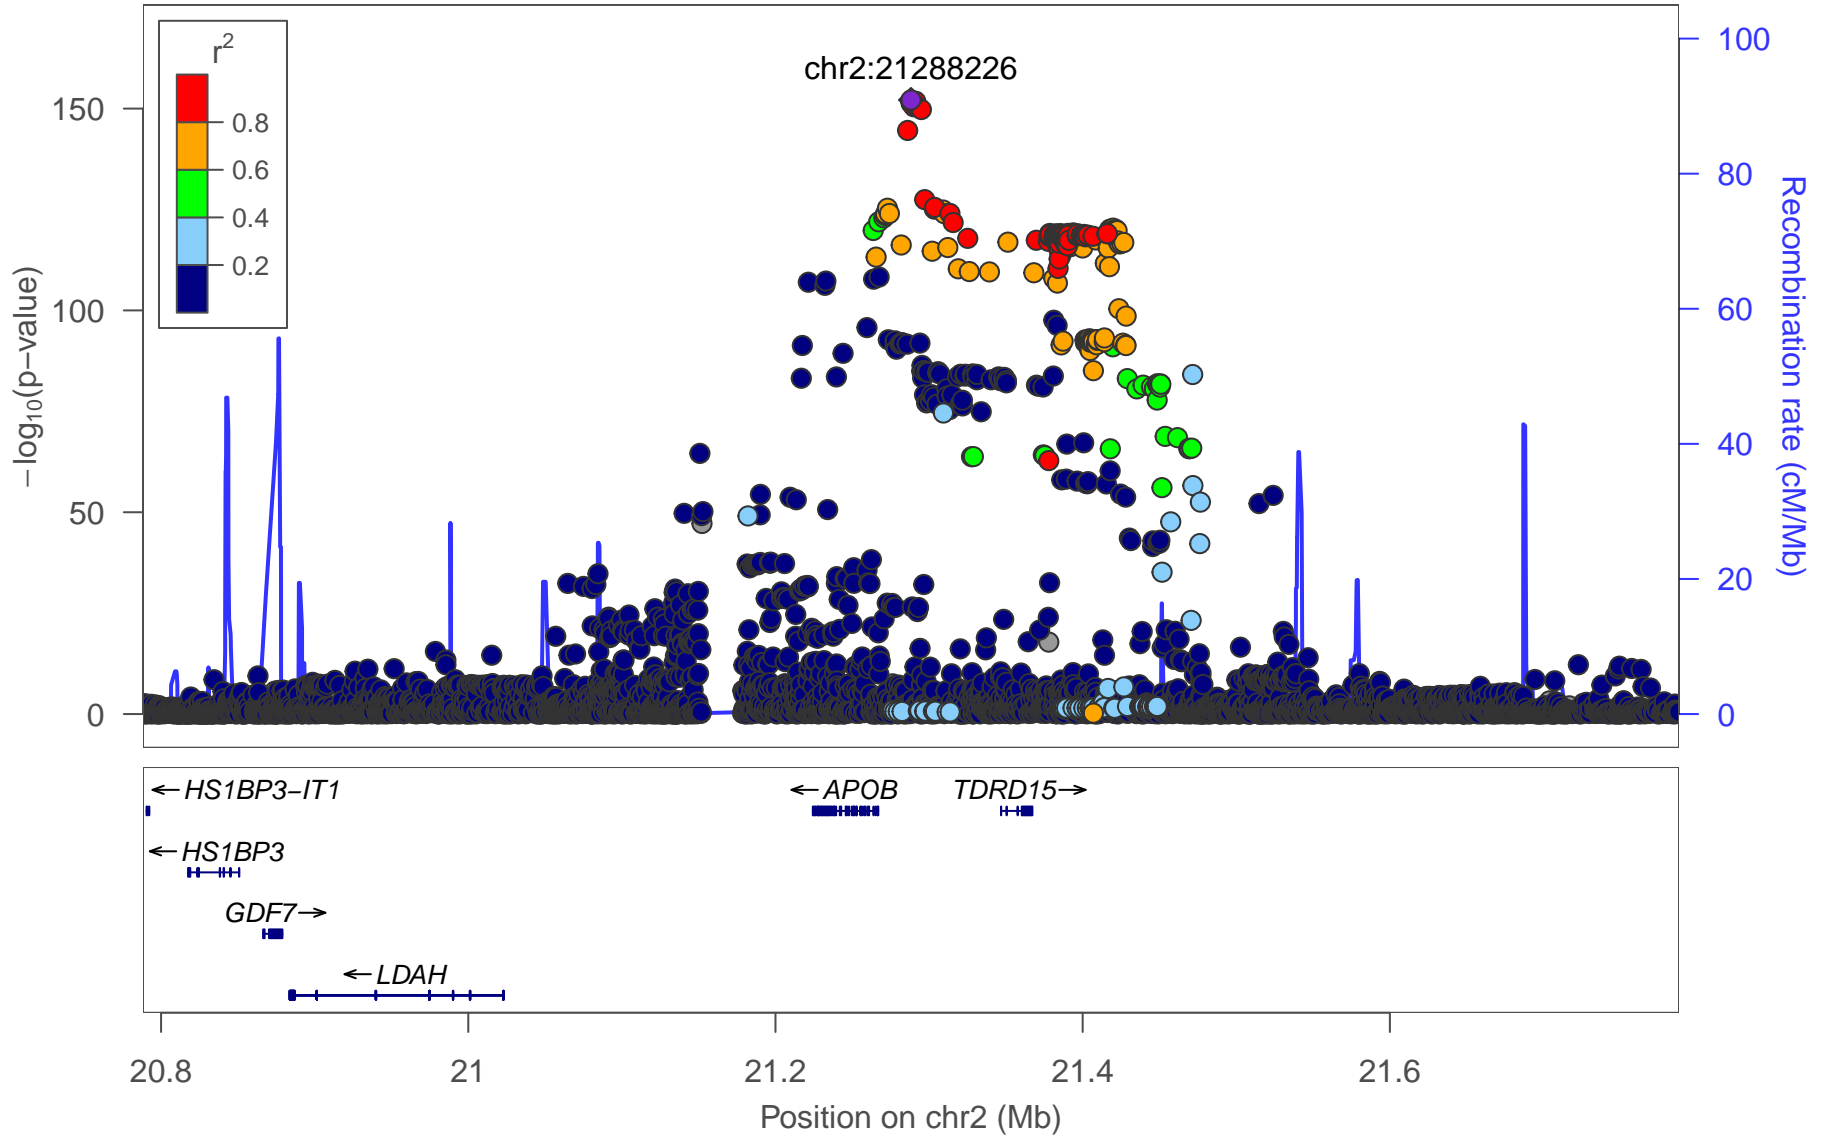

# 2\_2:VLDL-TG

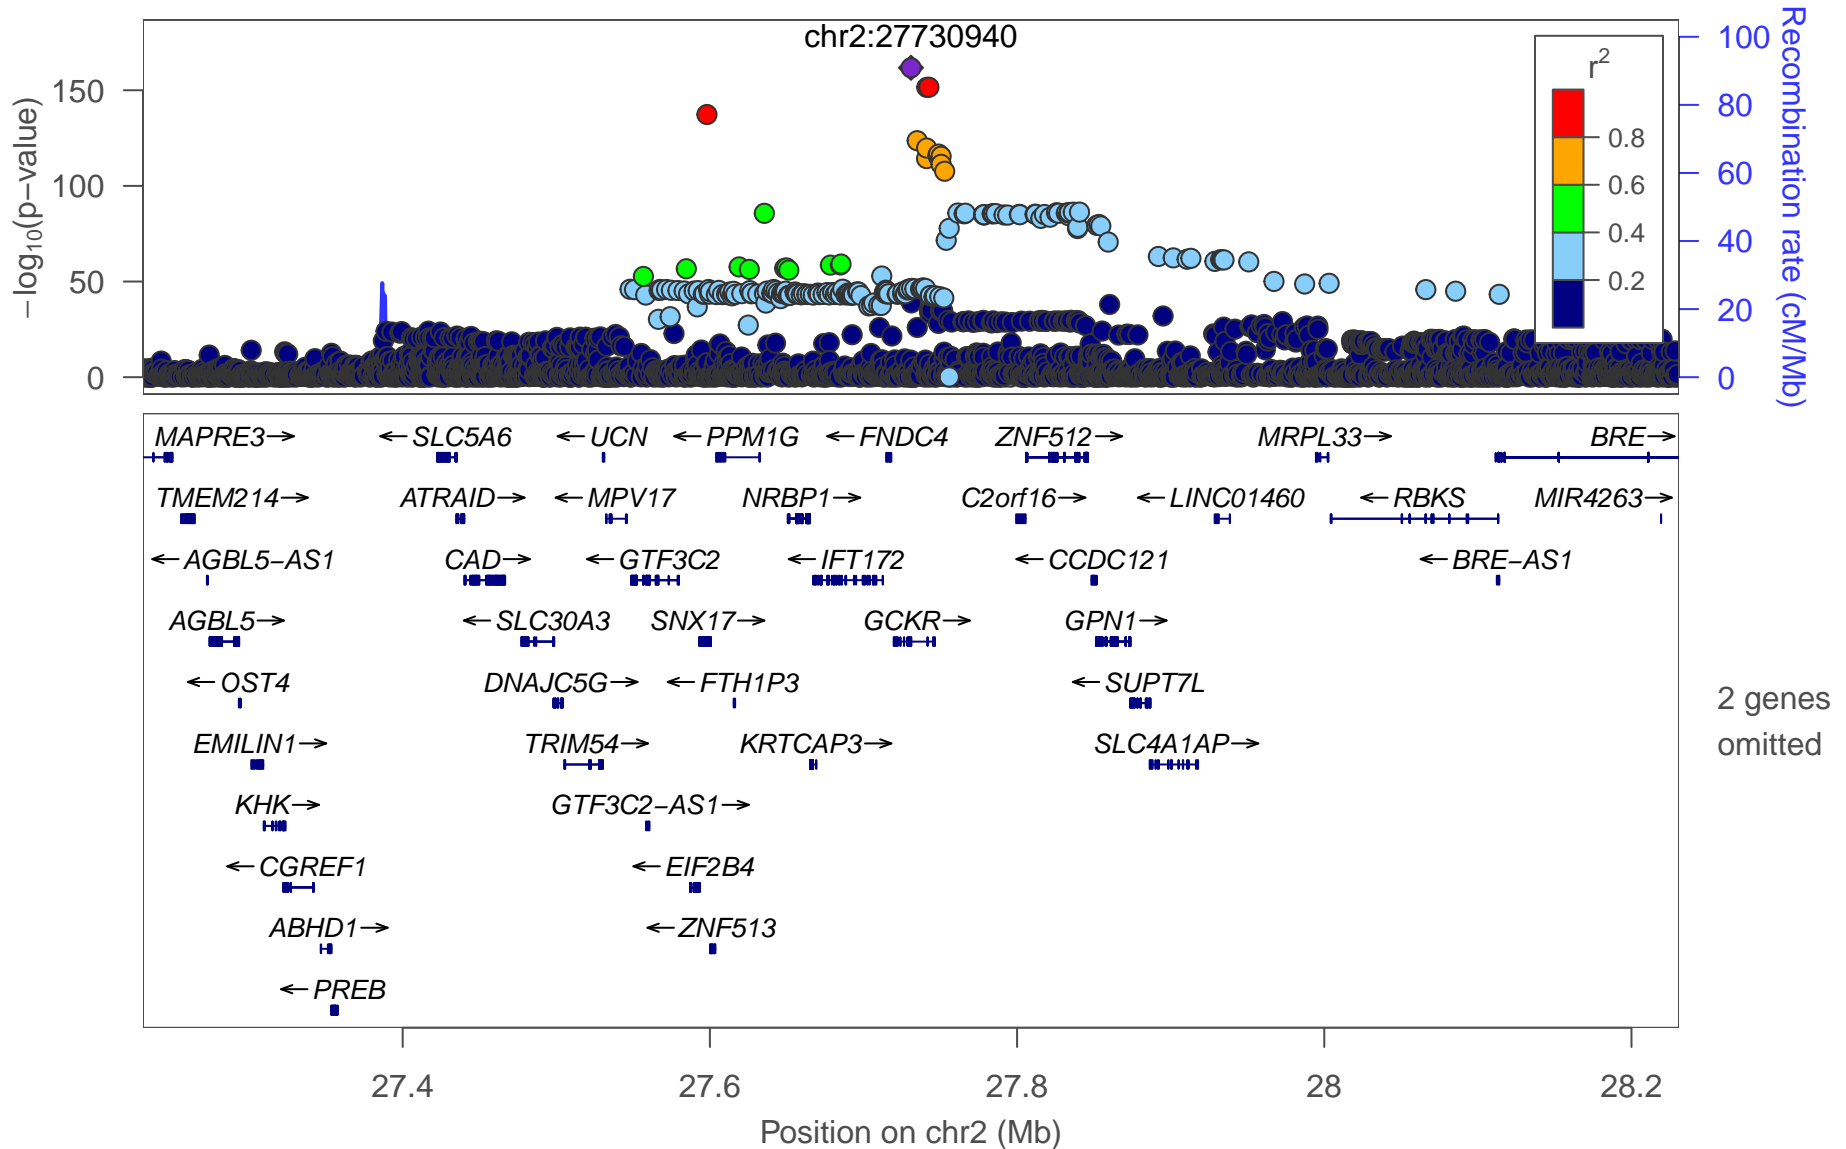

# 2\_3:IDL-CE

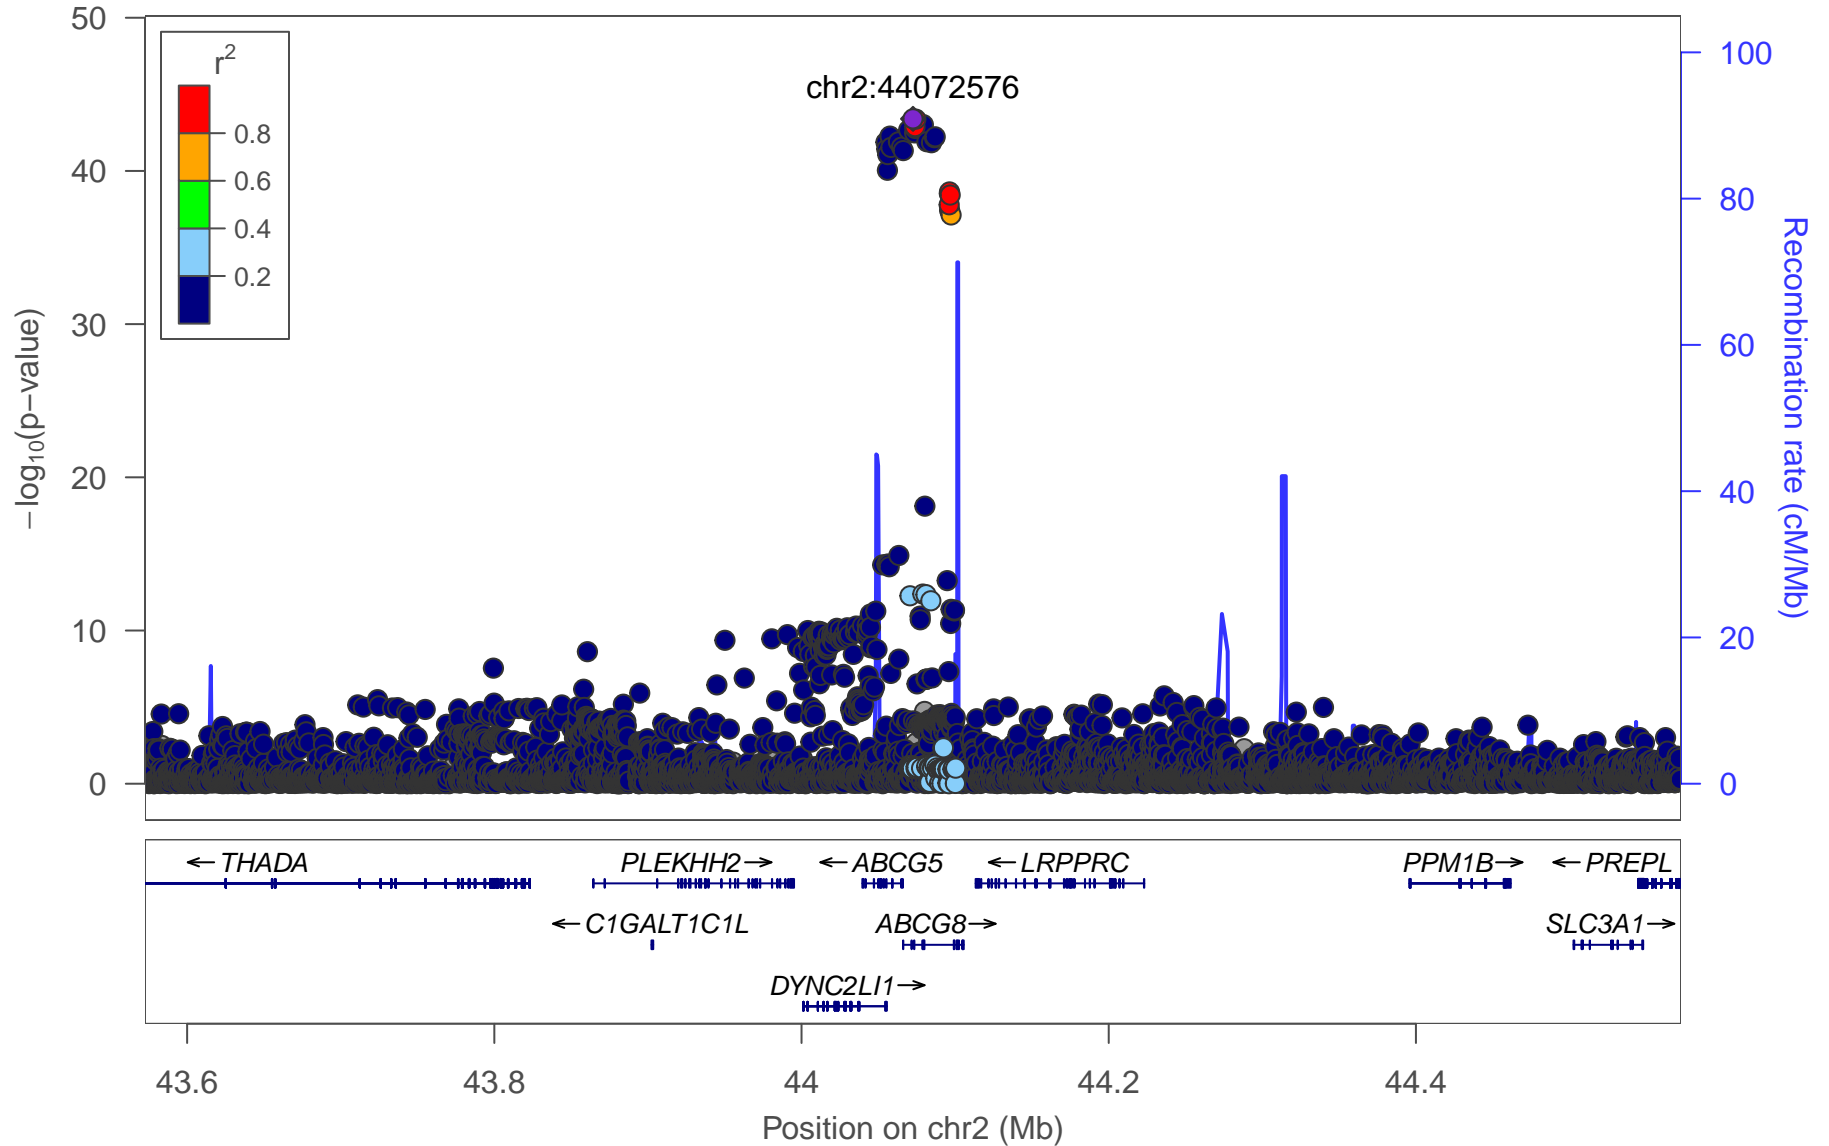

# 2\_4:S-LDL-PL\_percent

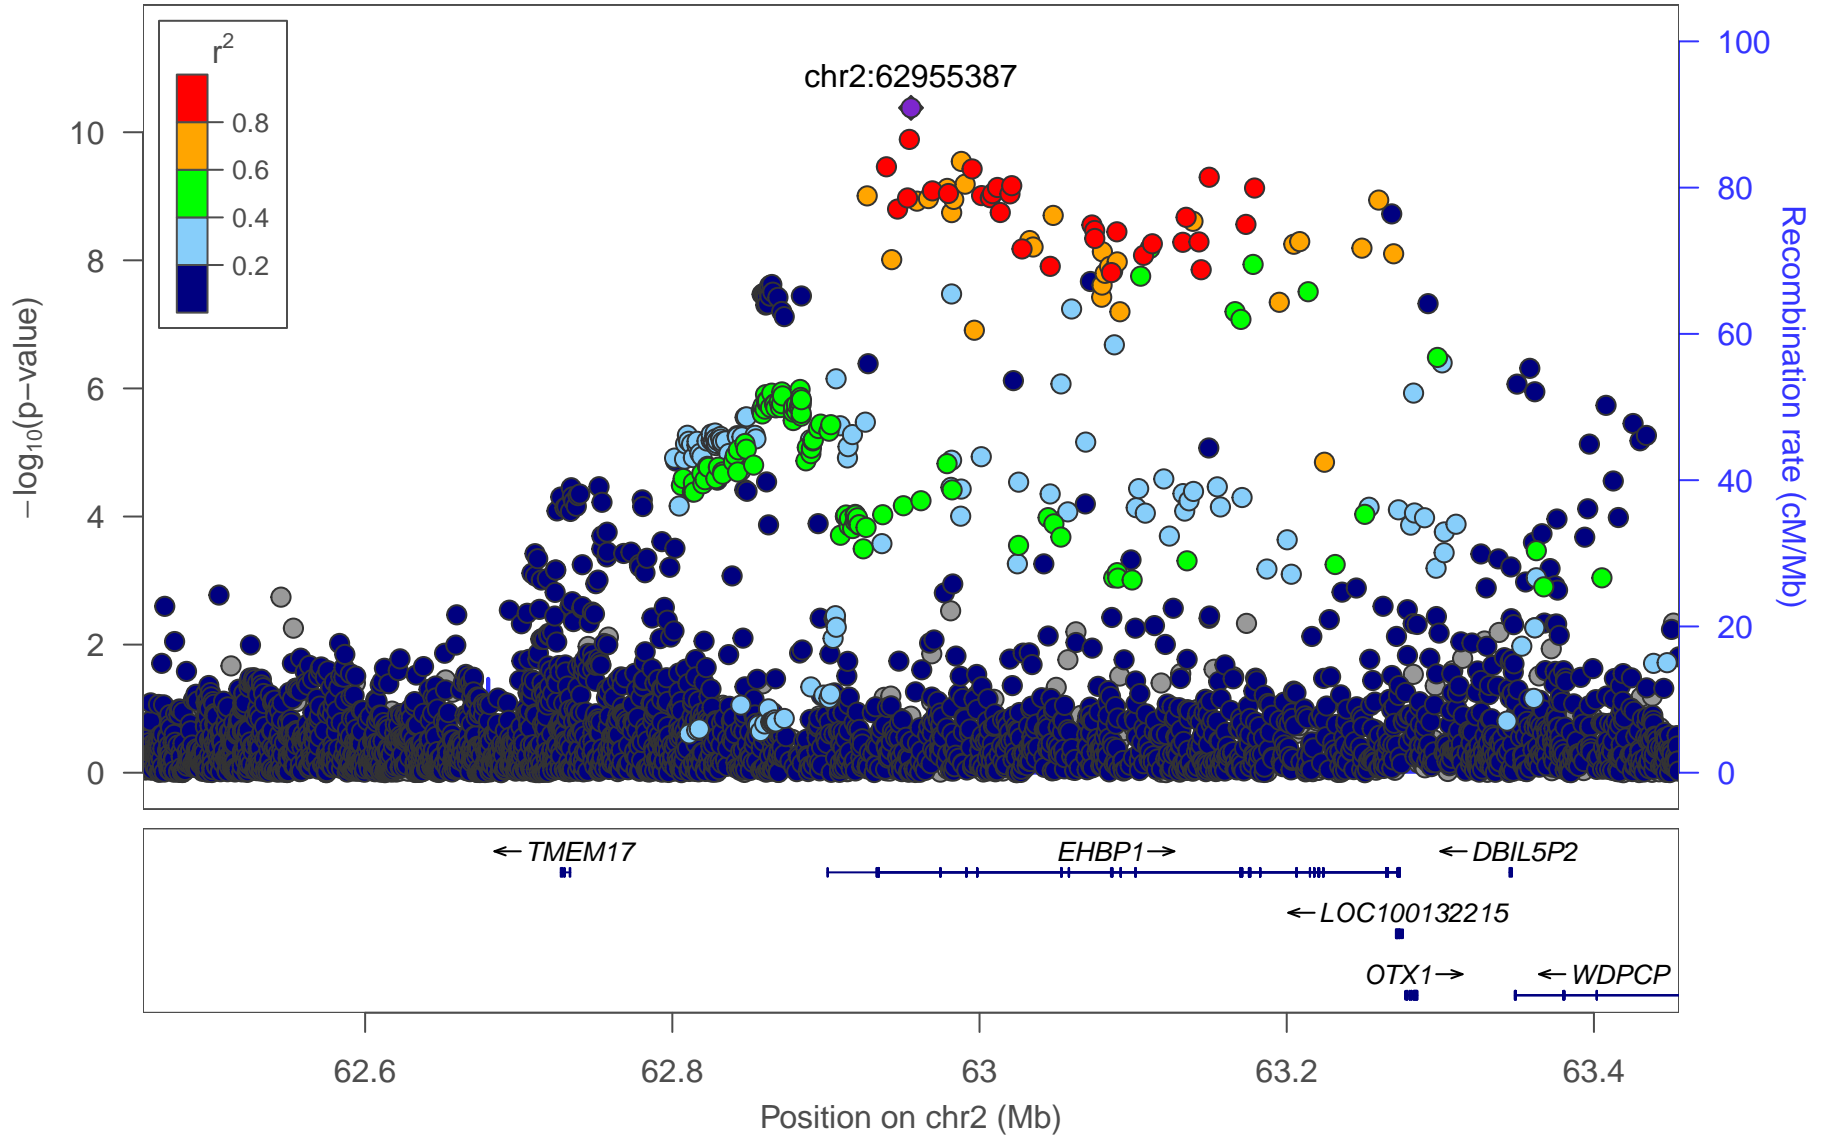



# 2\_5:Val

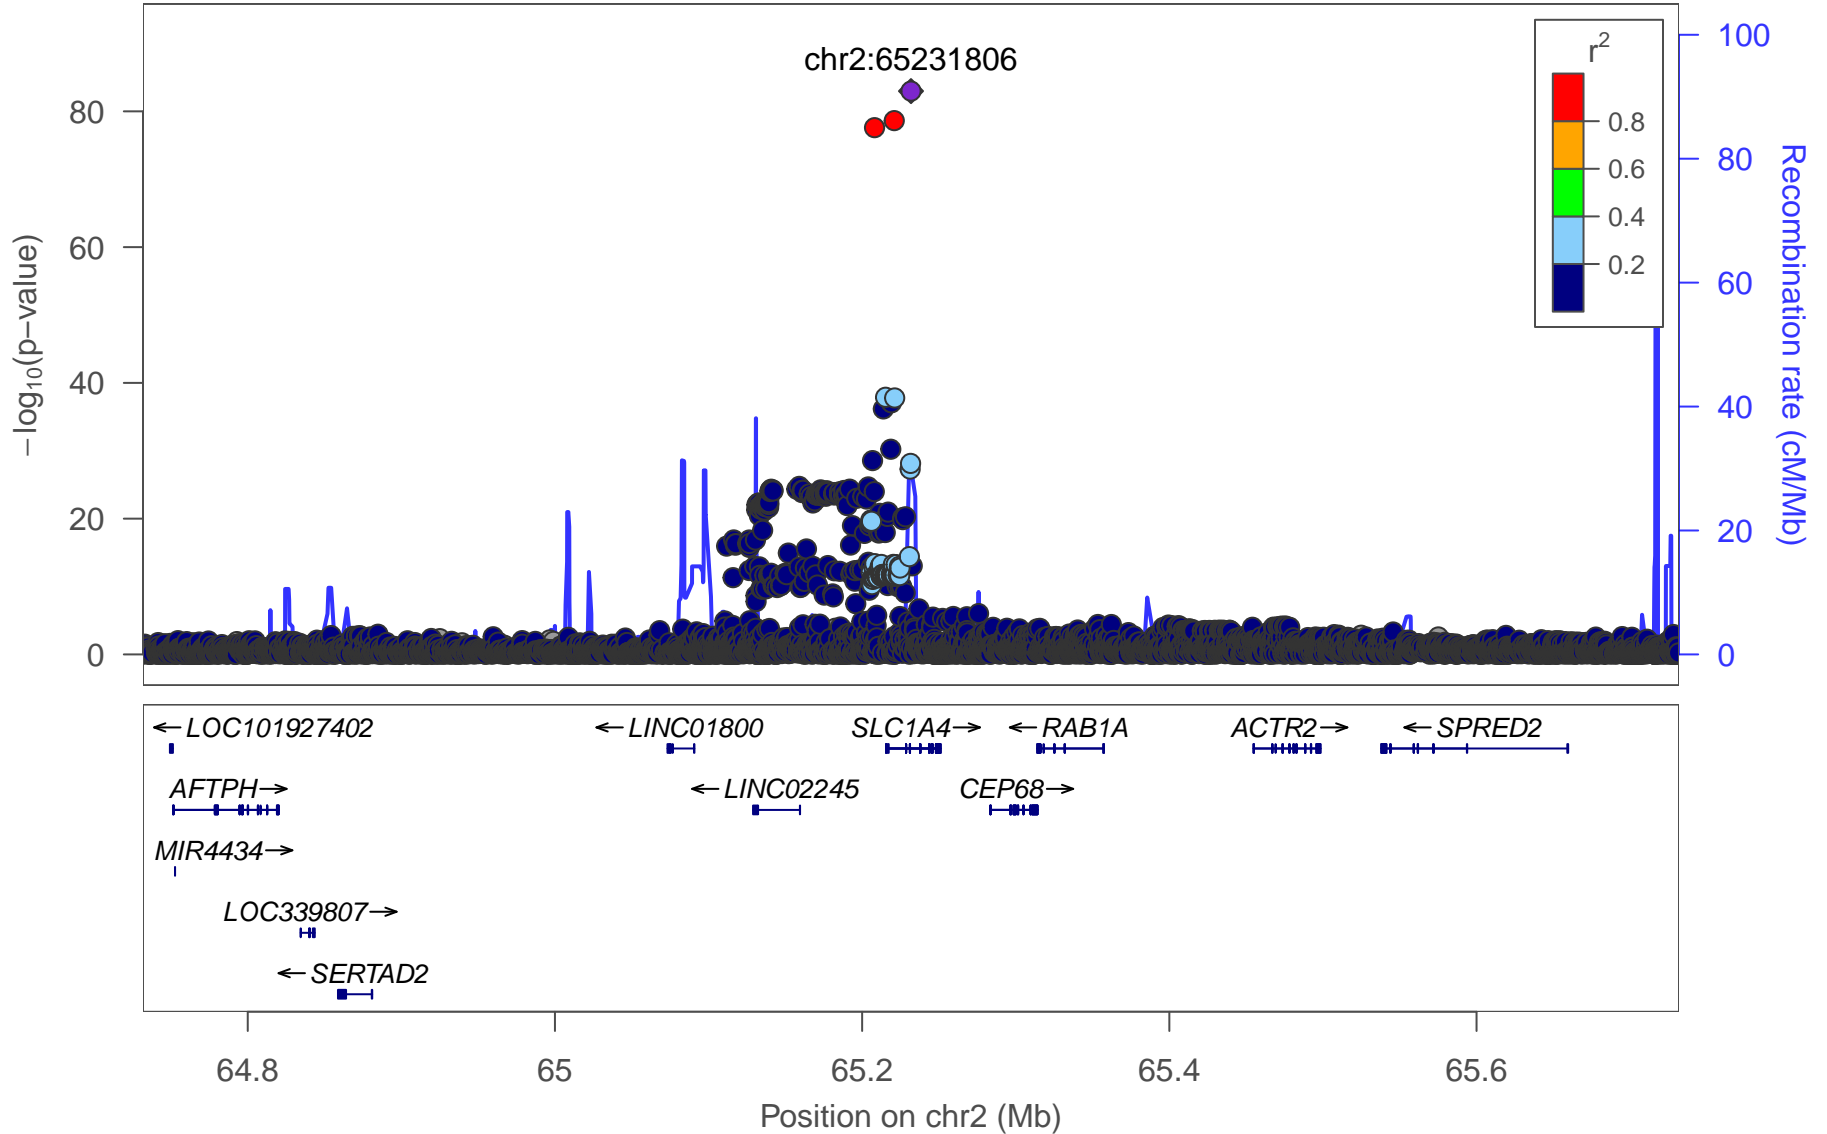

# 2\_6:Crea

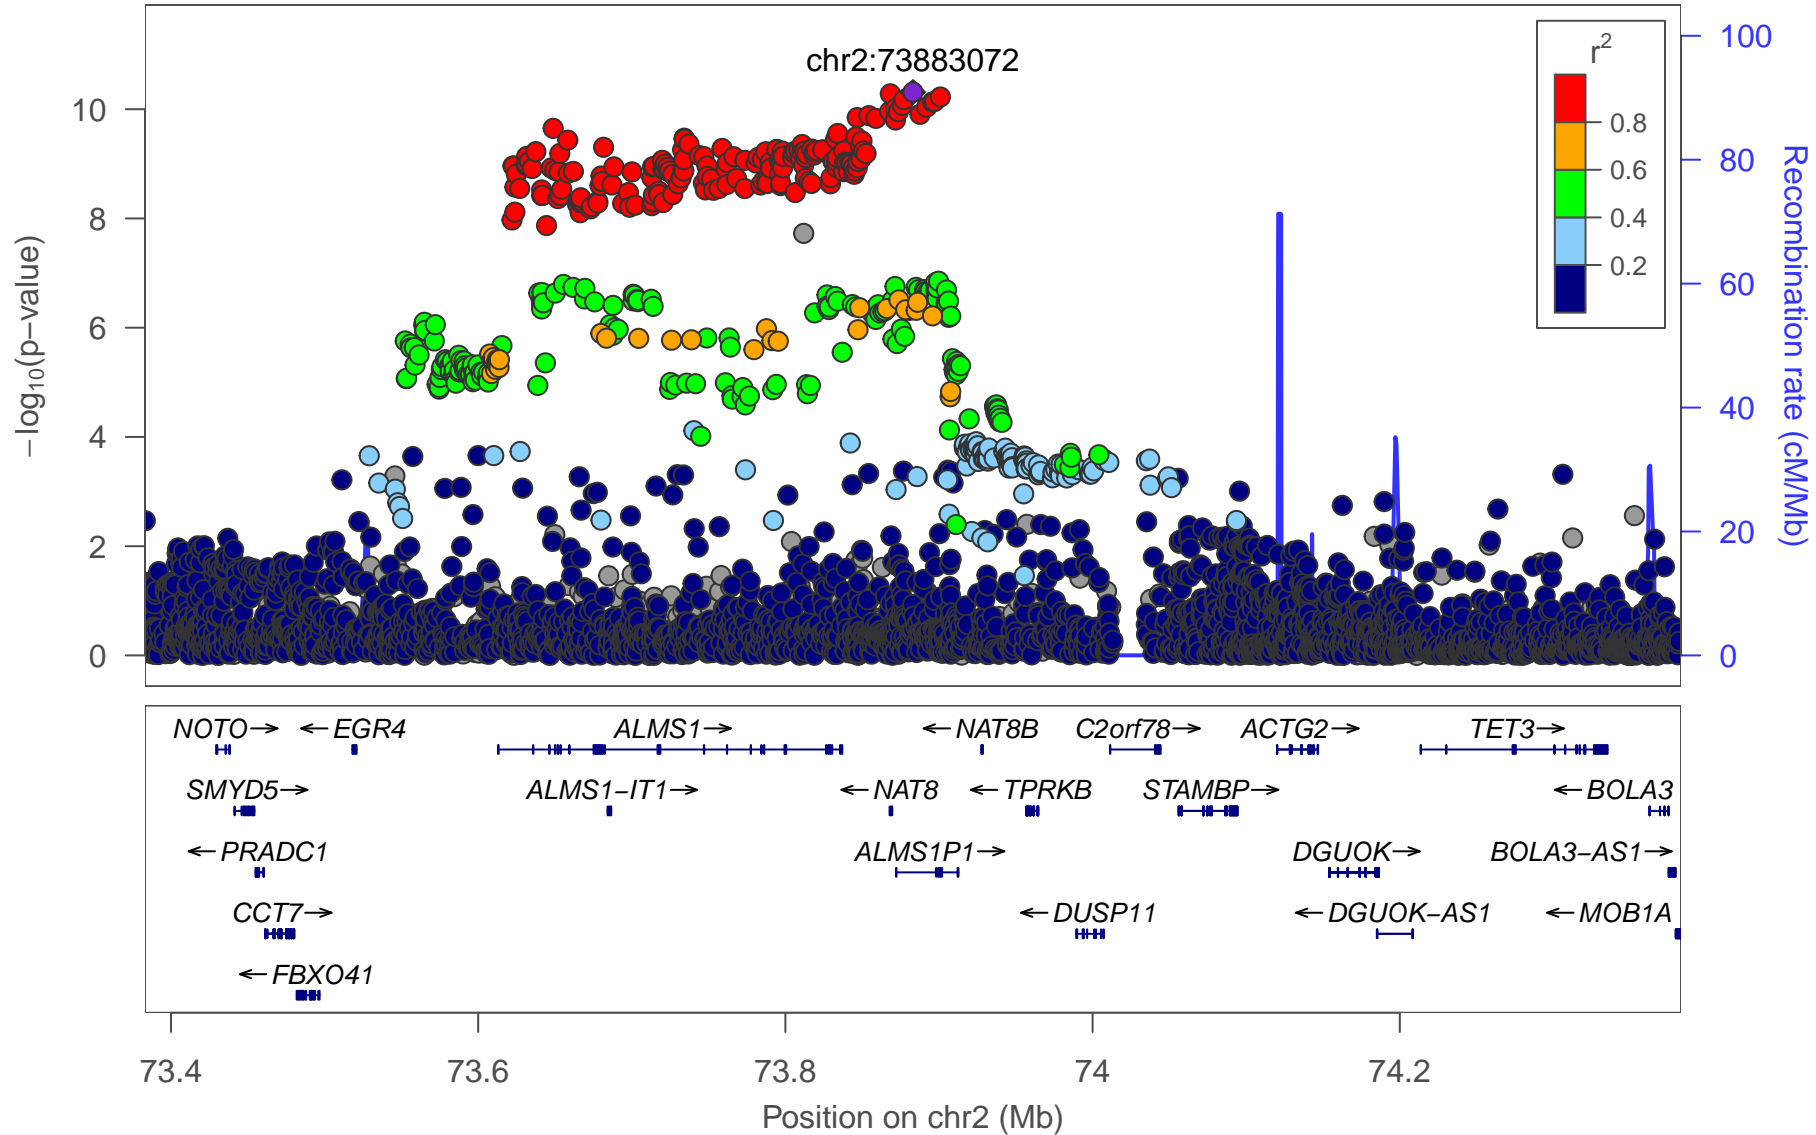

# 2\_7:XL-HDL-FC\_percent

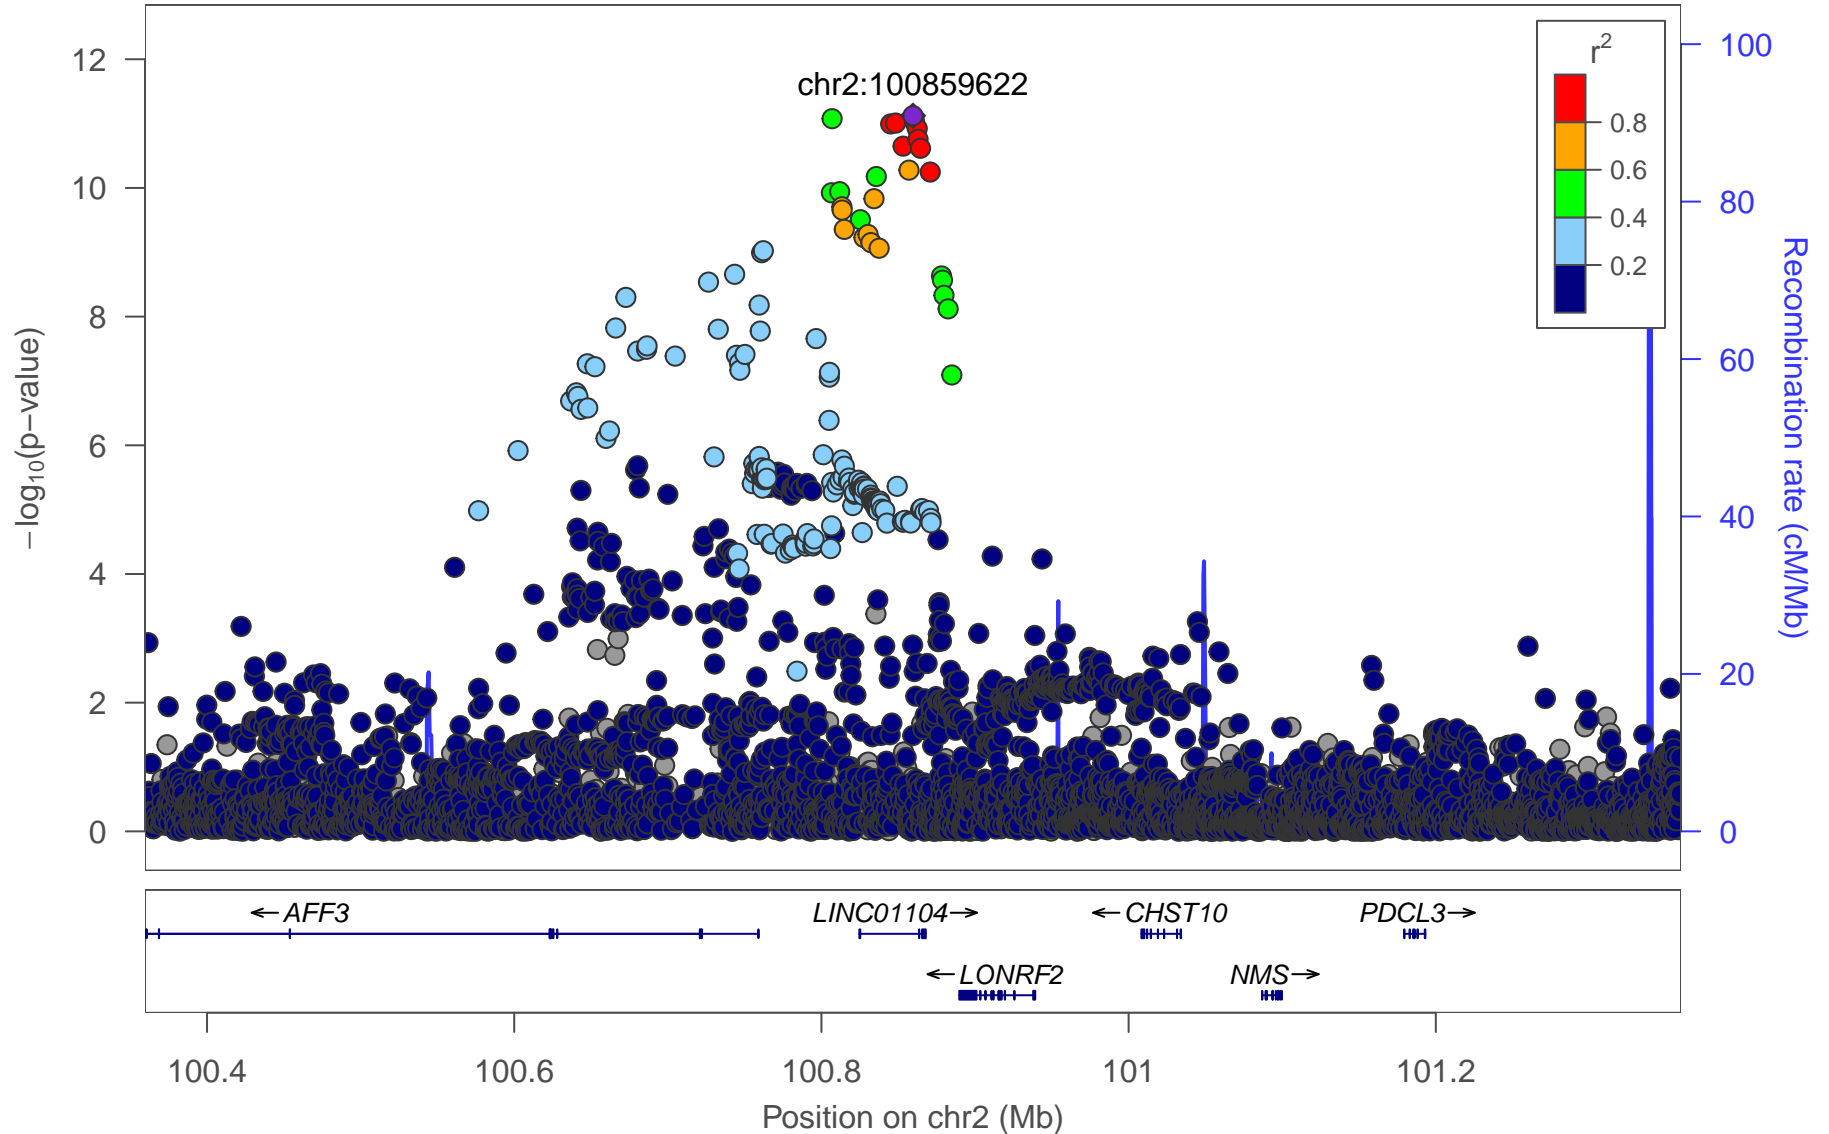

# 2\_8:XL-HDL-FC\_percent

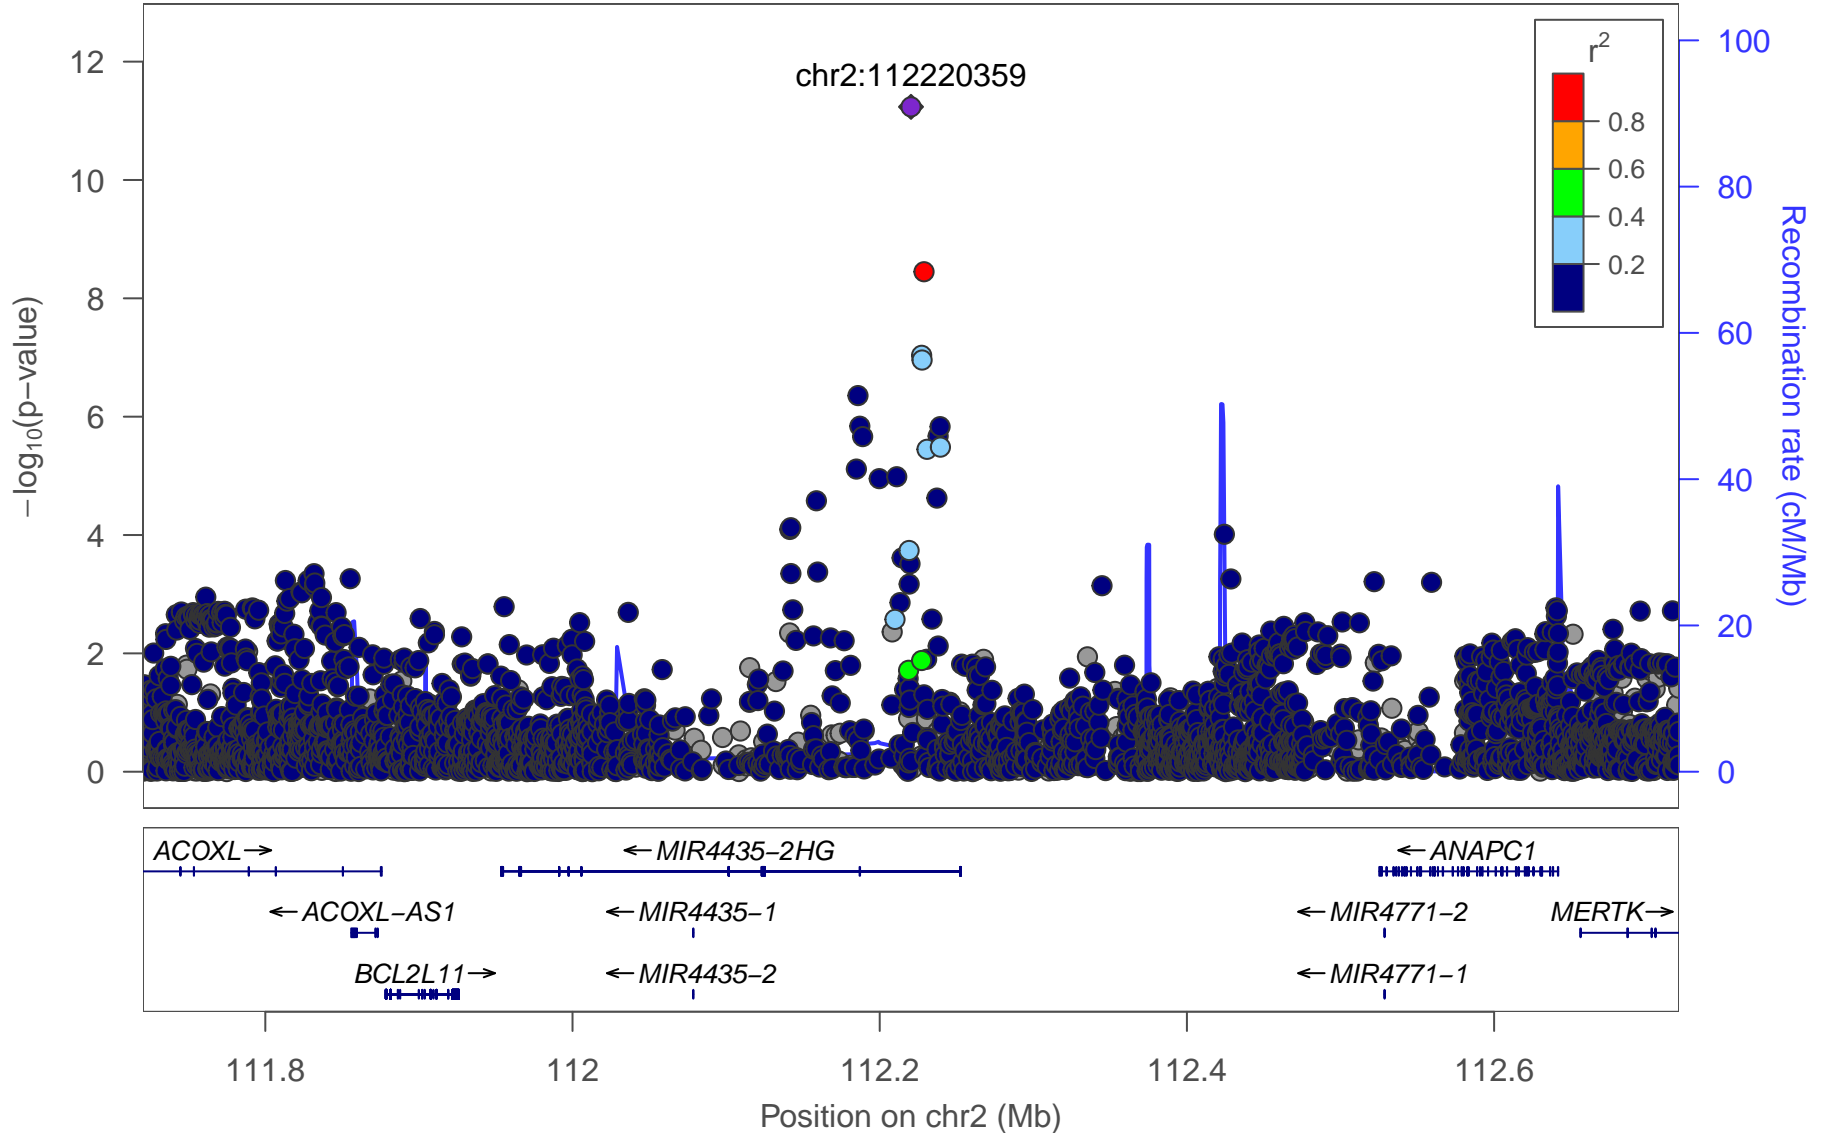

# 2\_9:GlycA

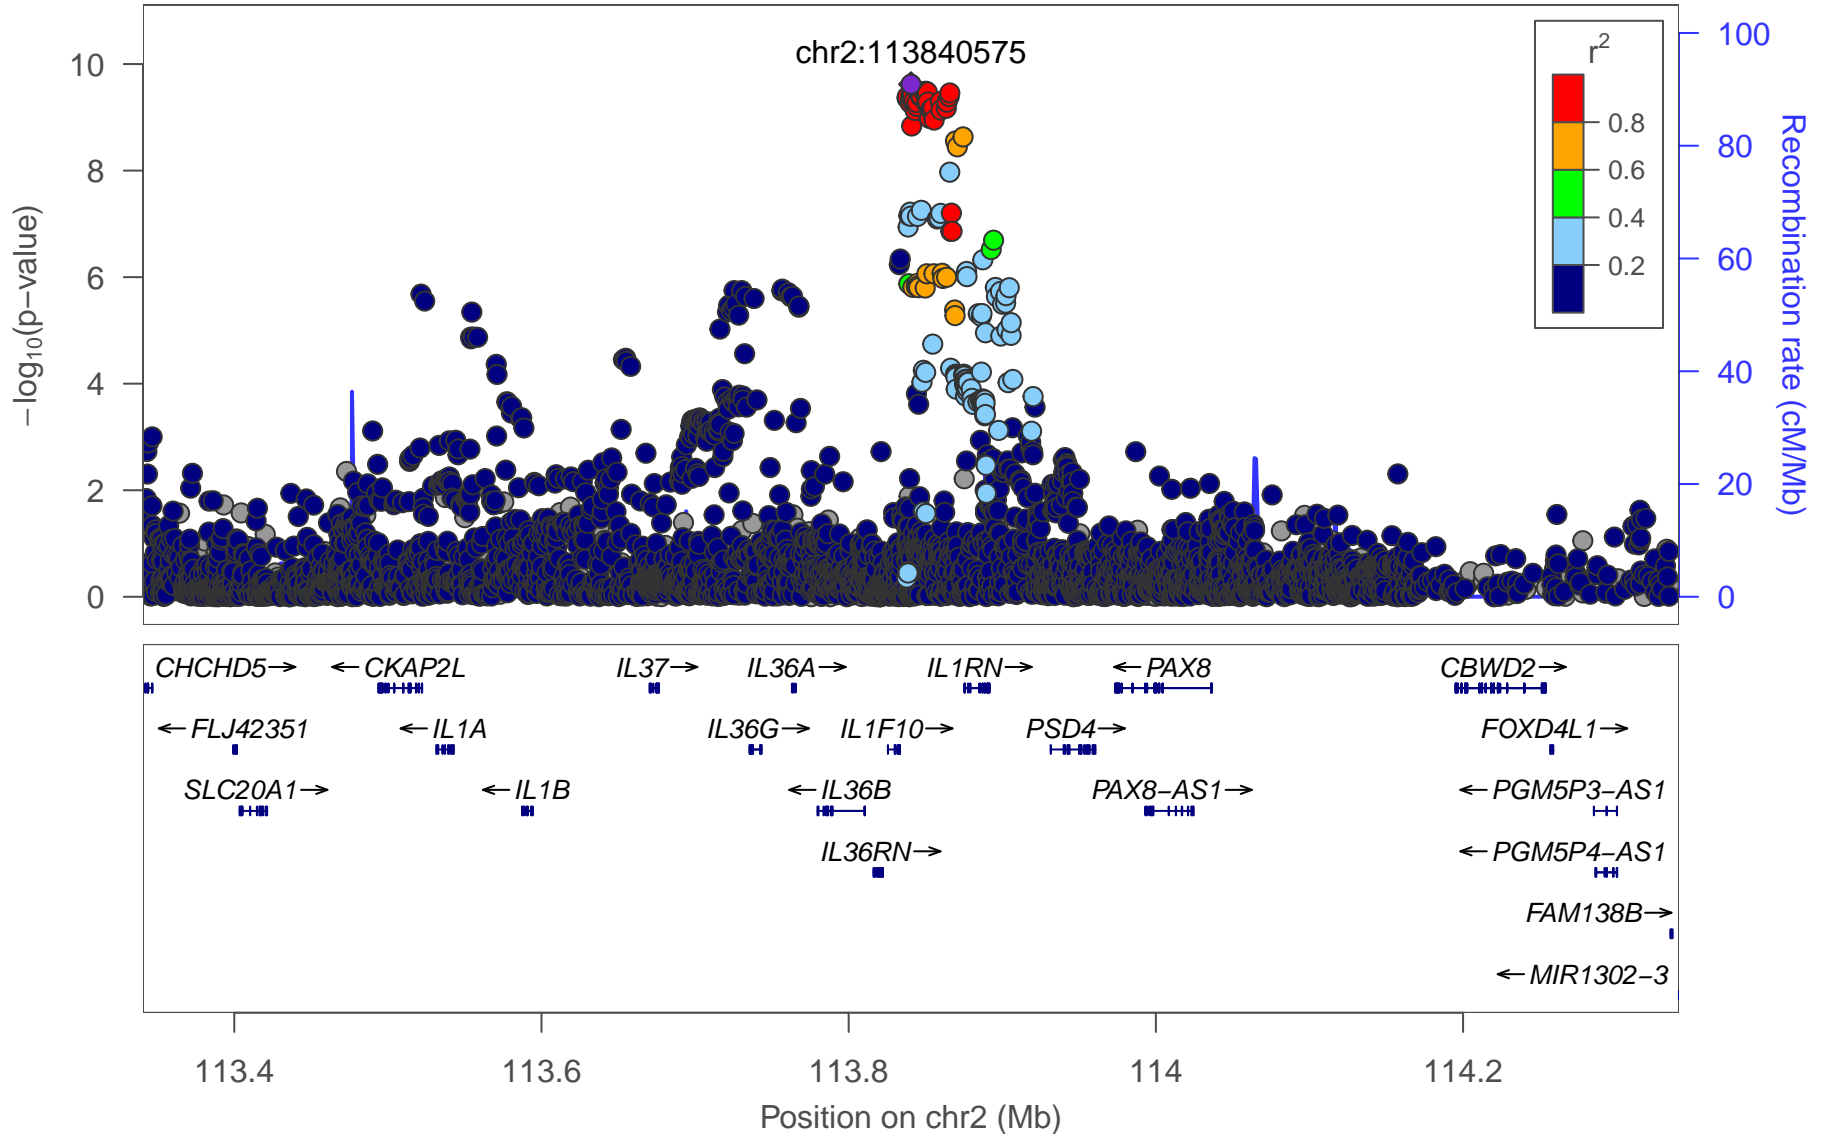

# 2\_10:IDL-CE

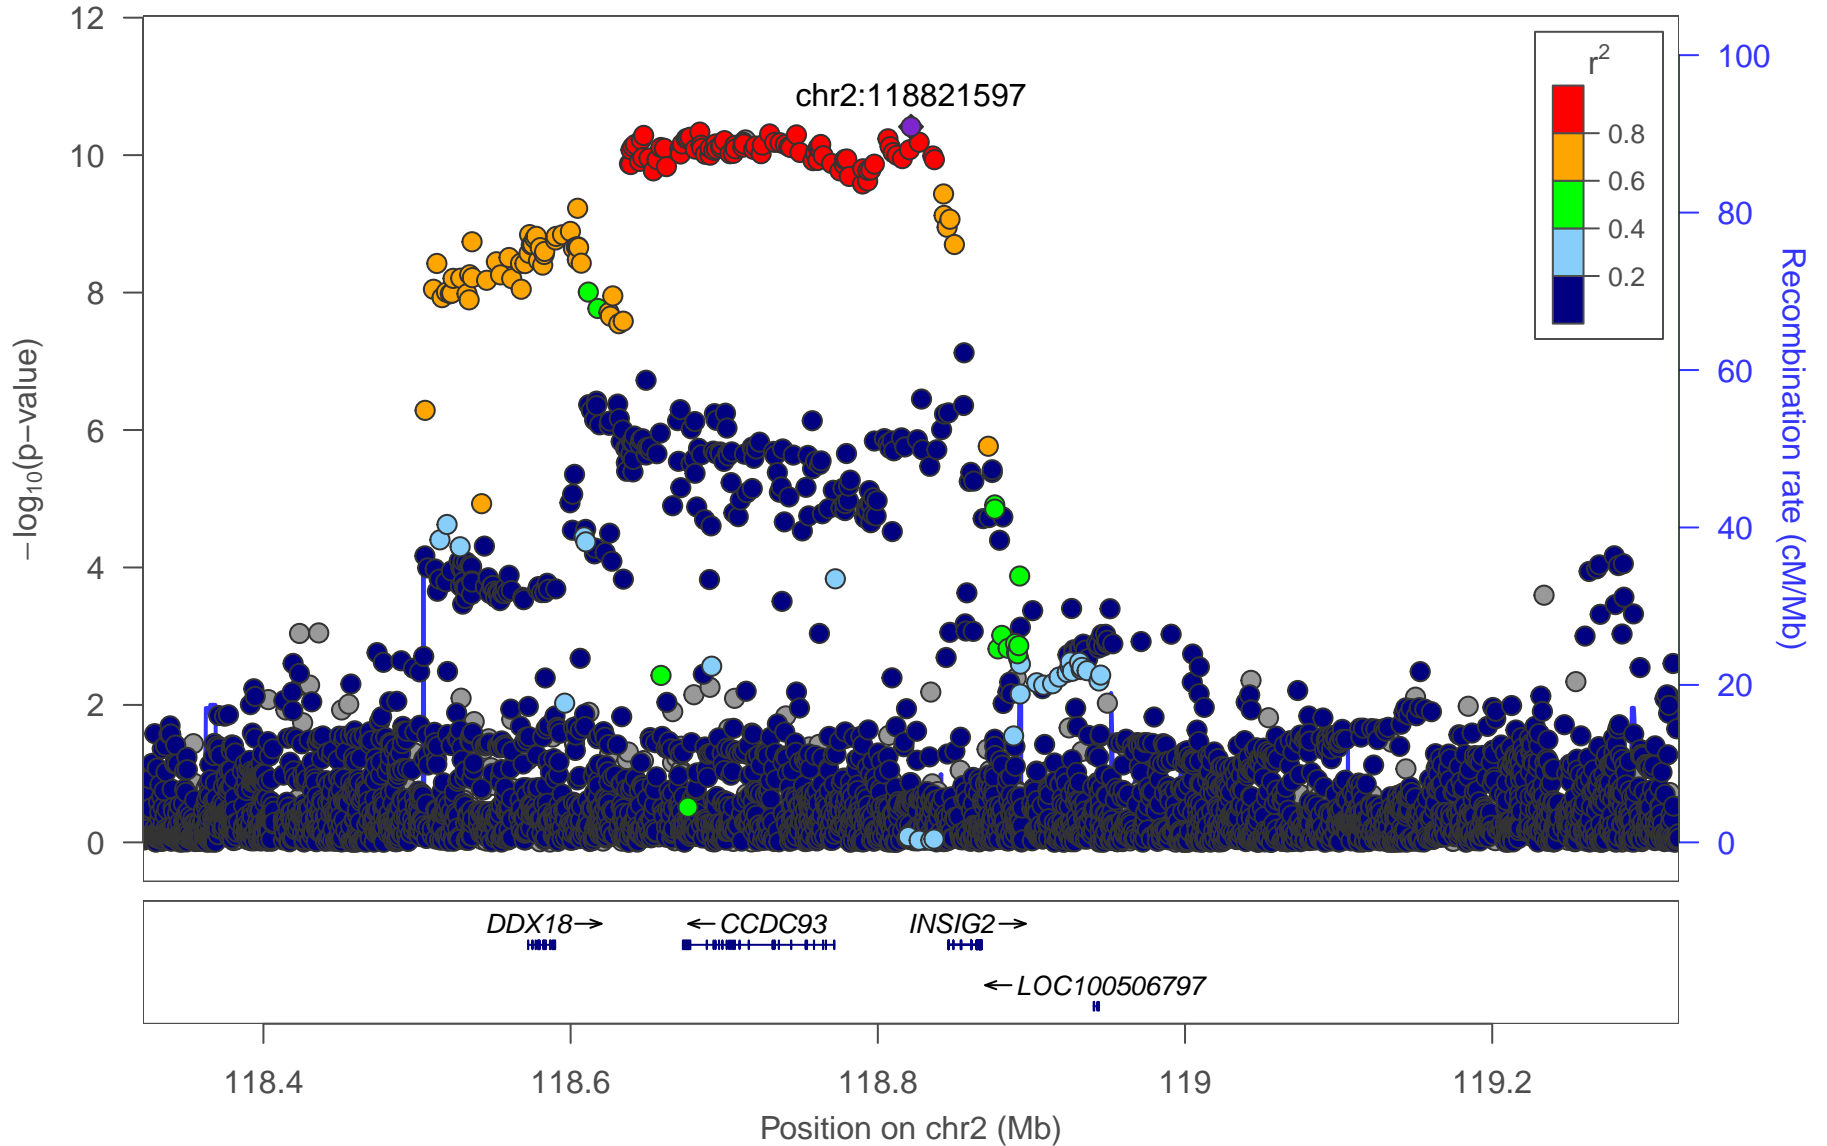

# 2\_11:Crea

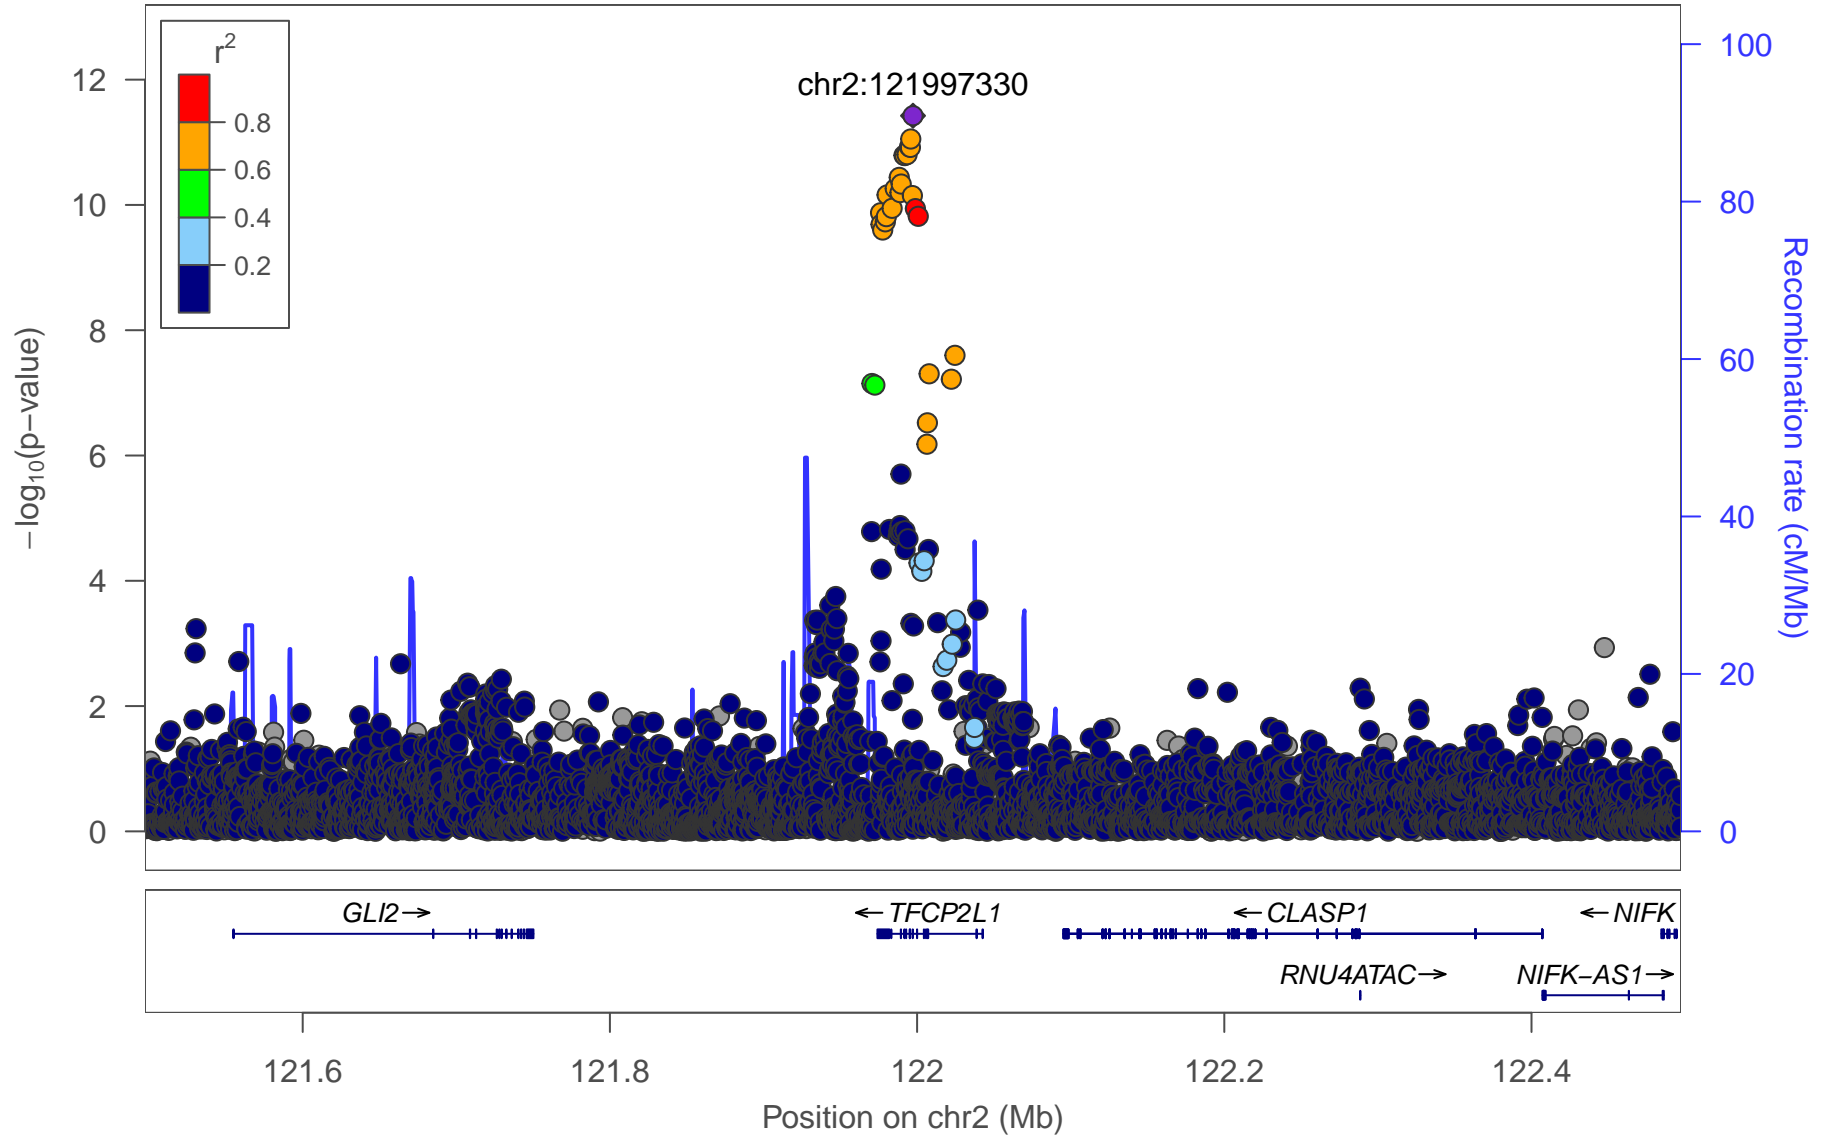

# 2\_12:XL-HDL-FC

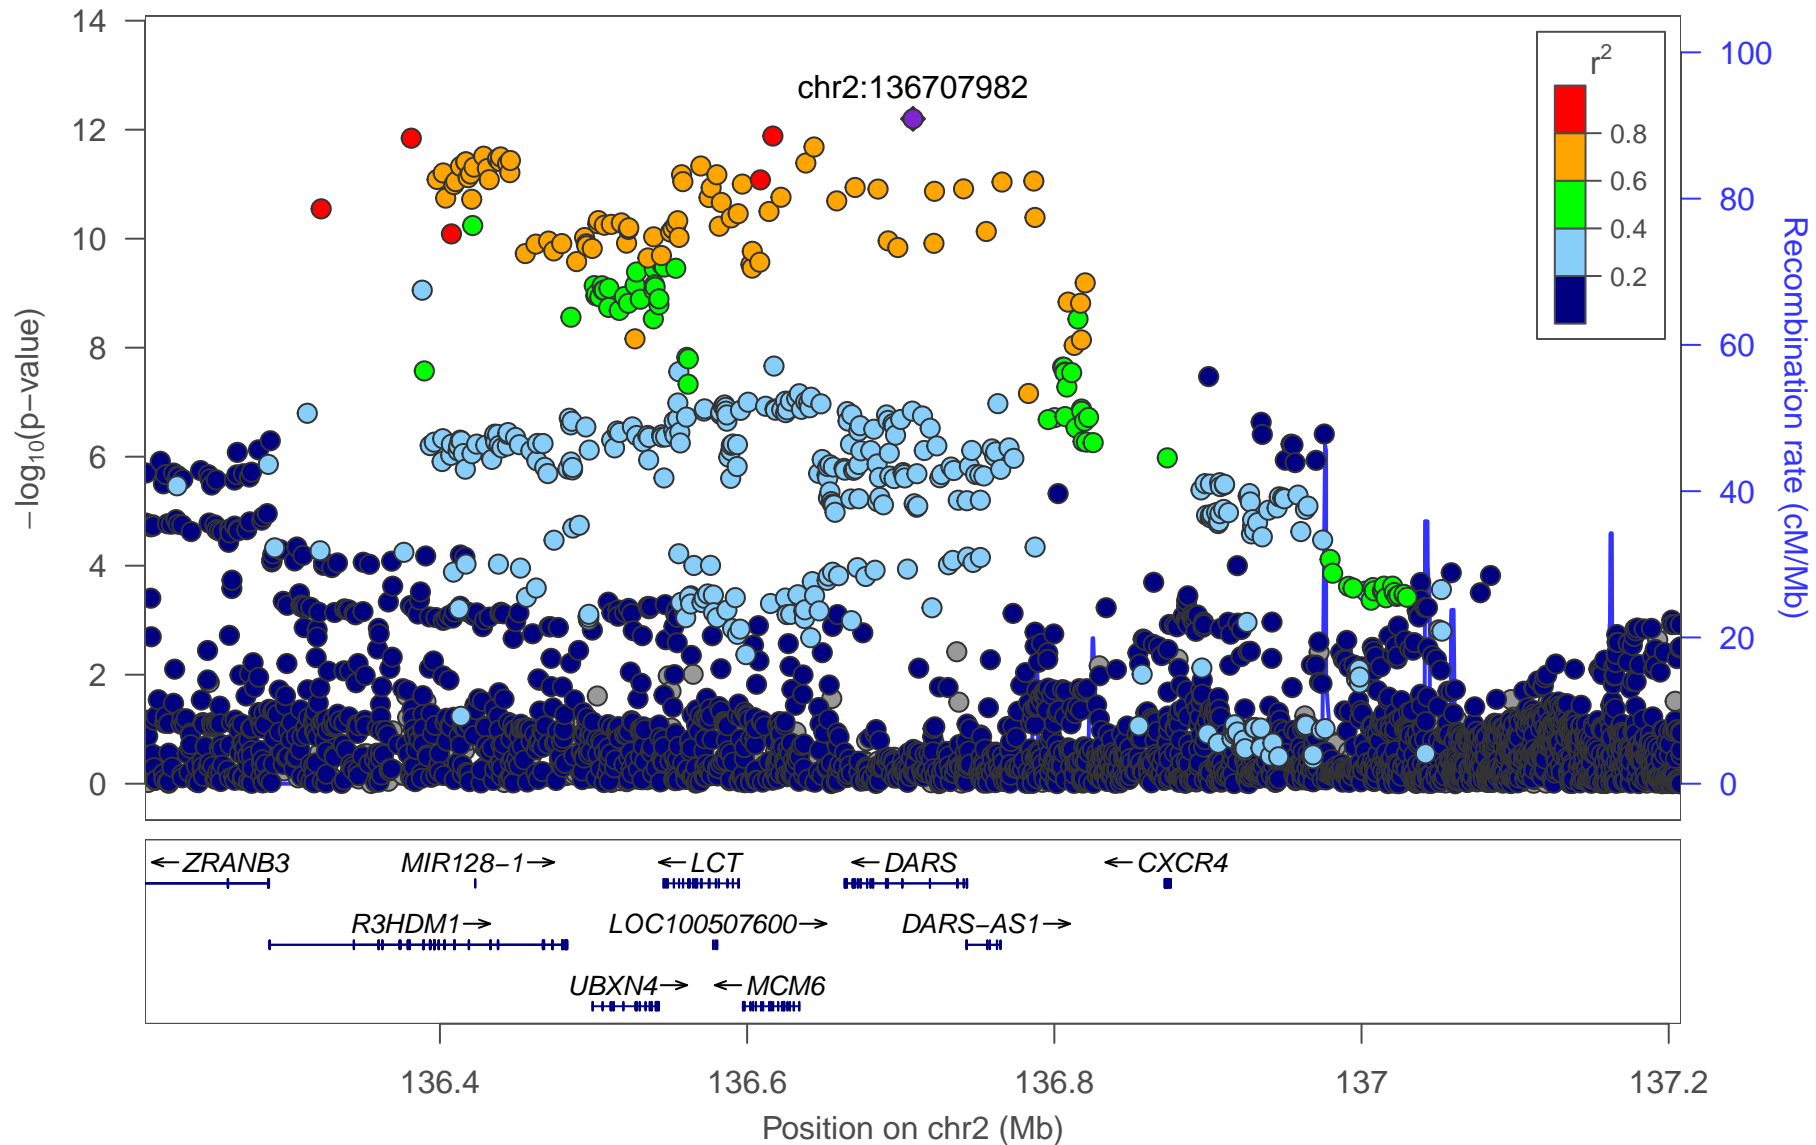



# 2\_13:XL-HDL-PL

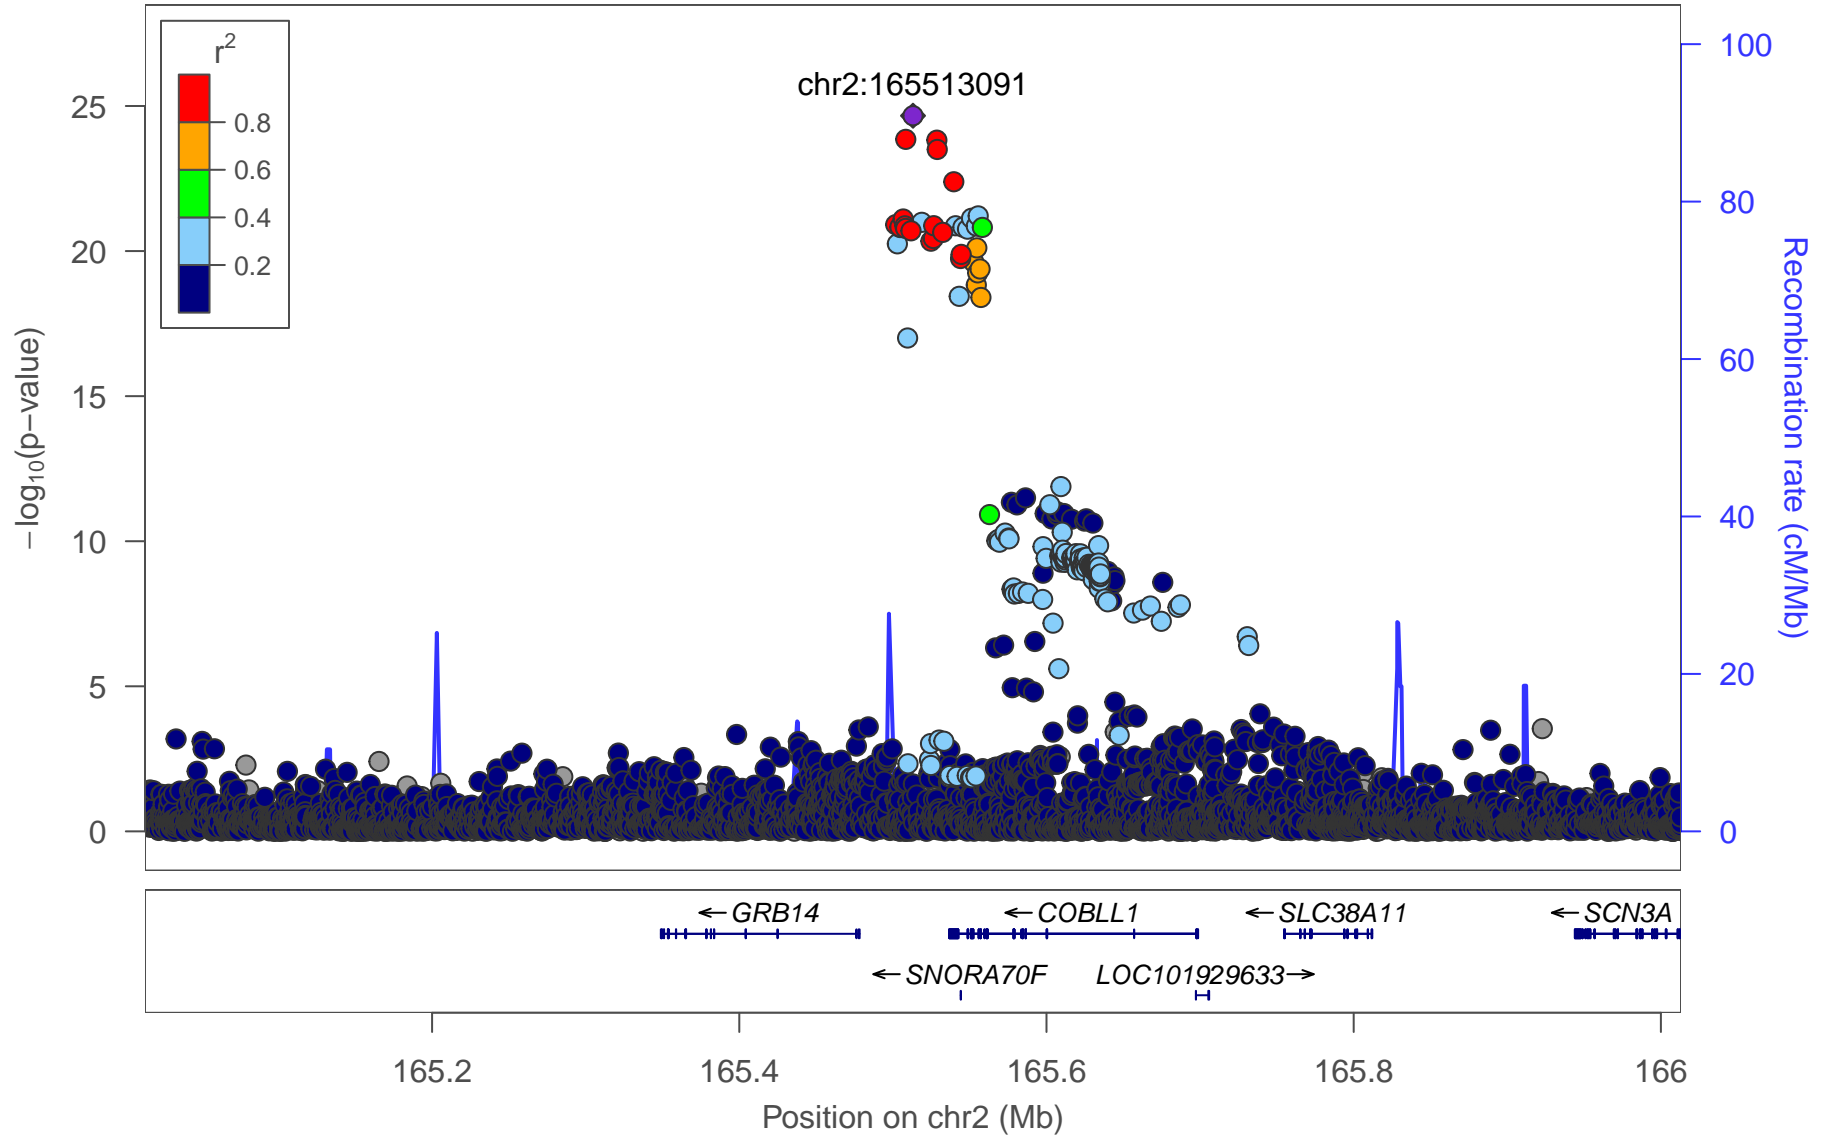

# 2\_14:Glc

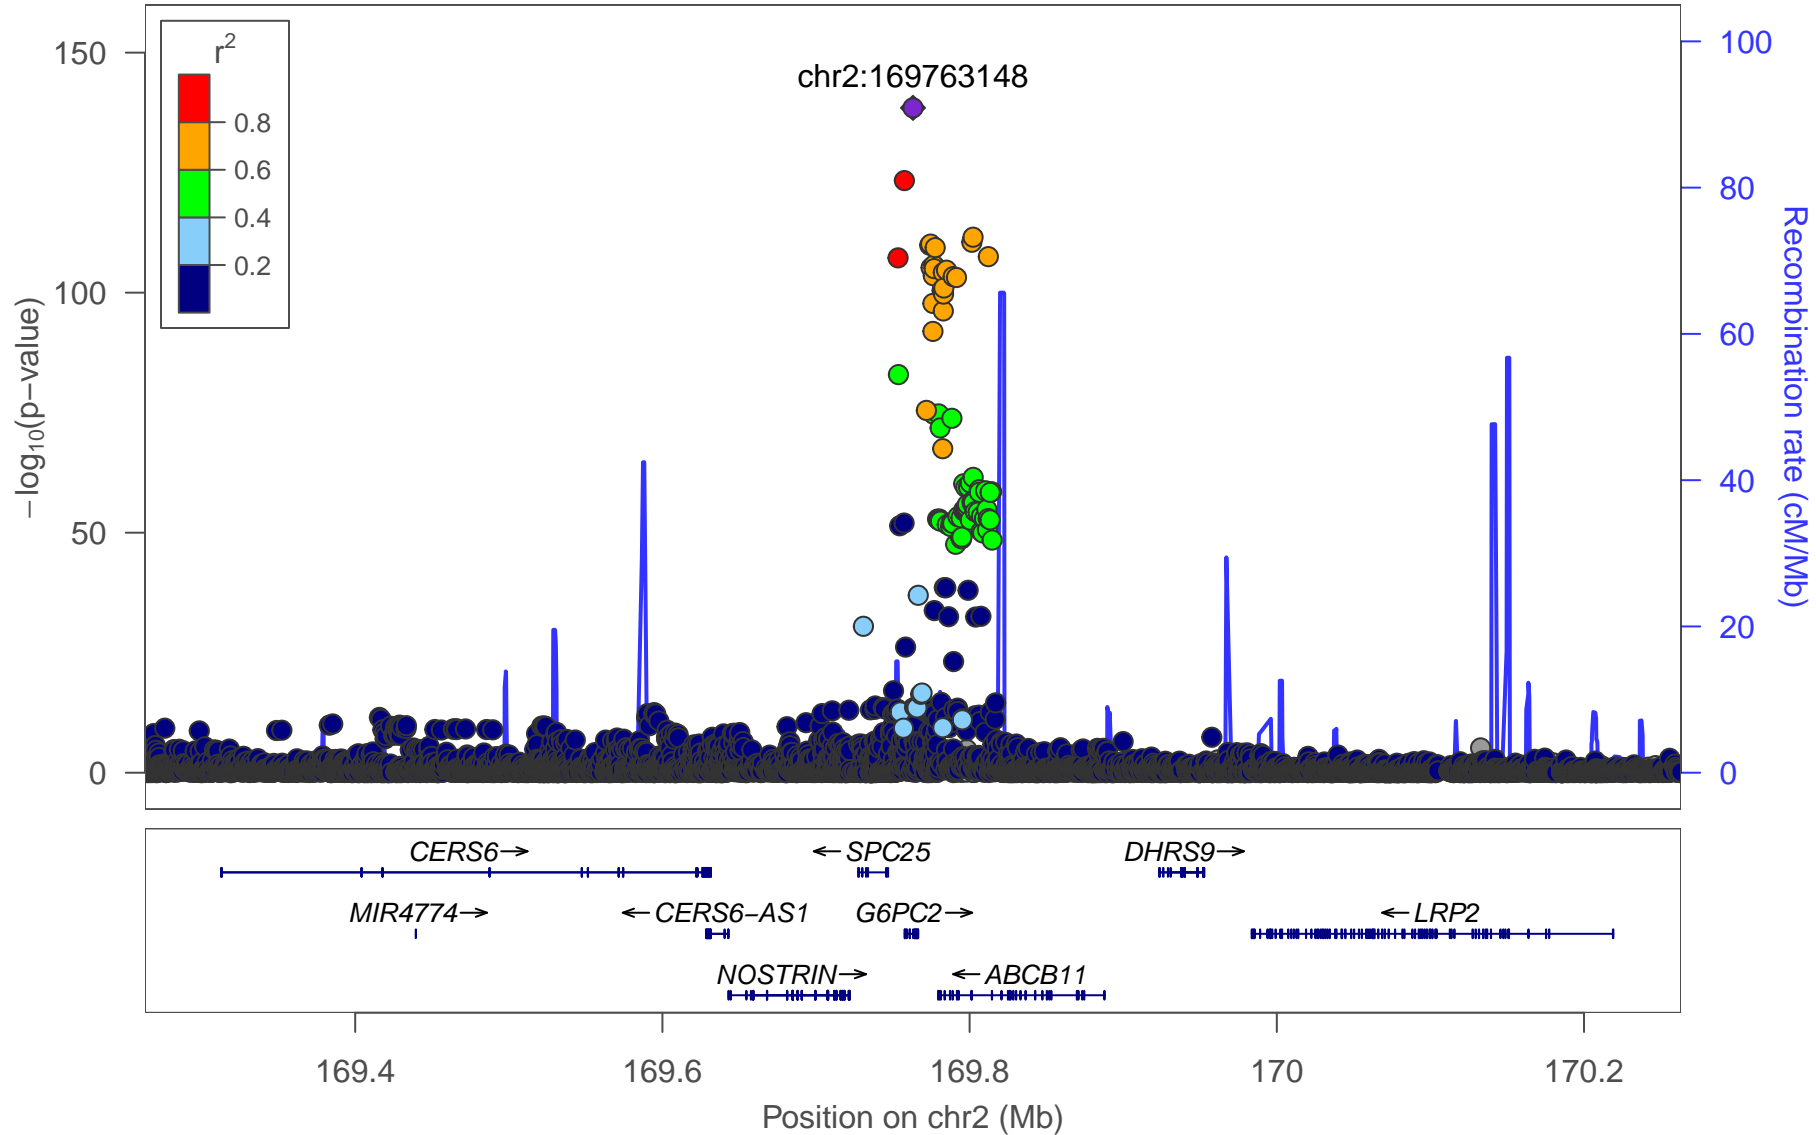

# 2\_15:Crea

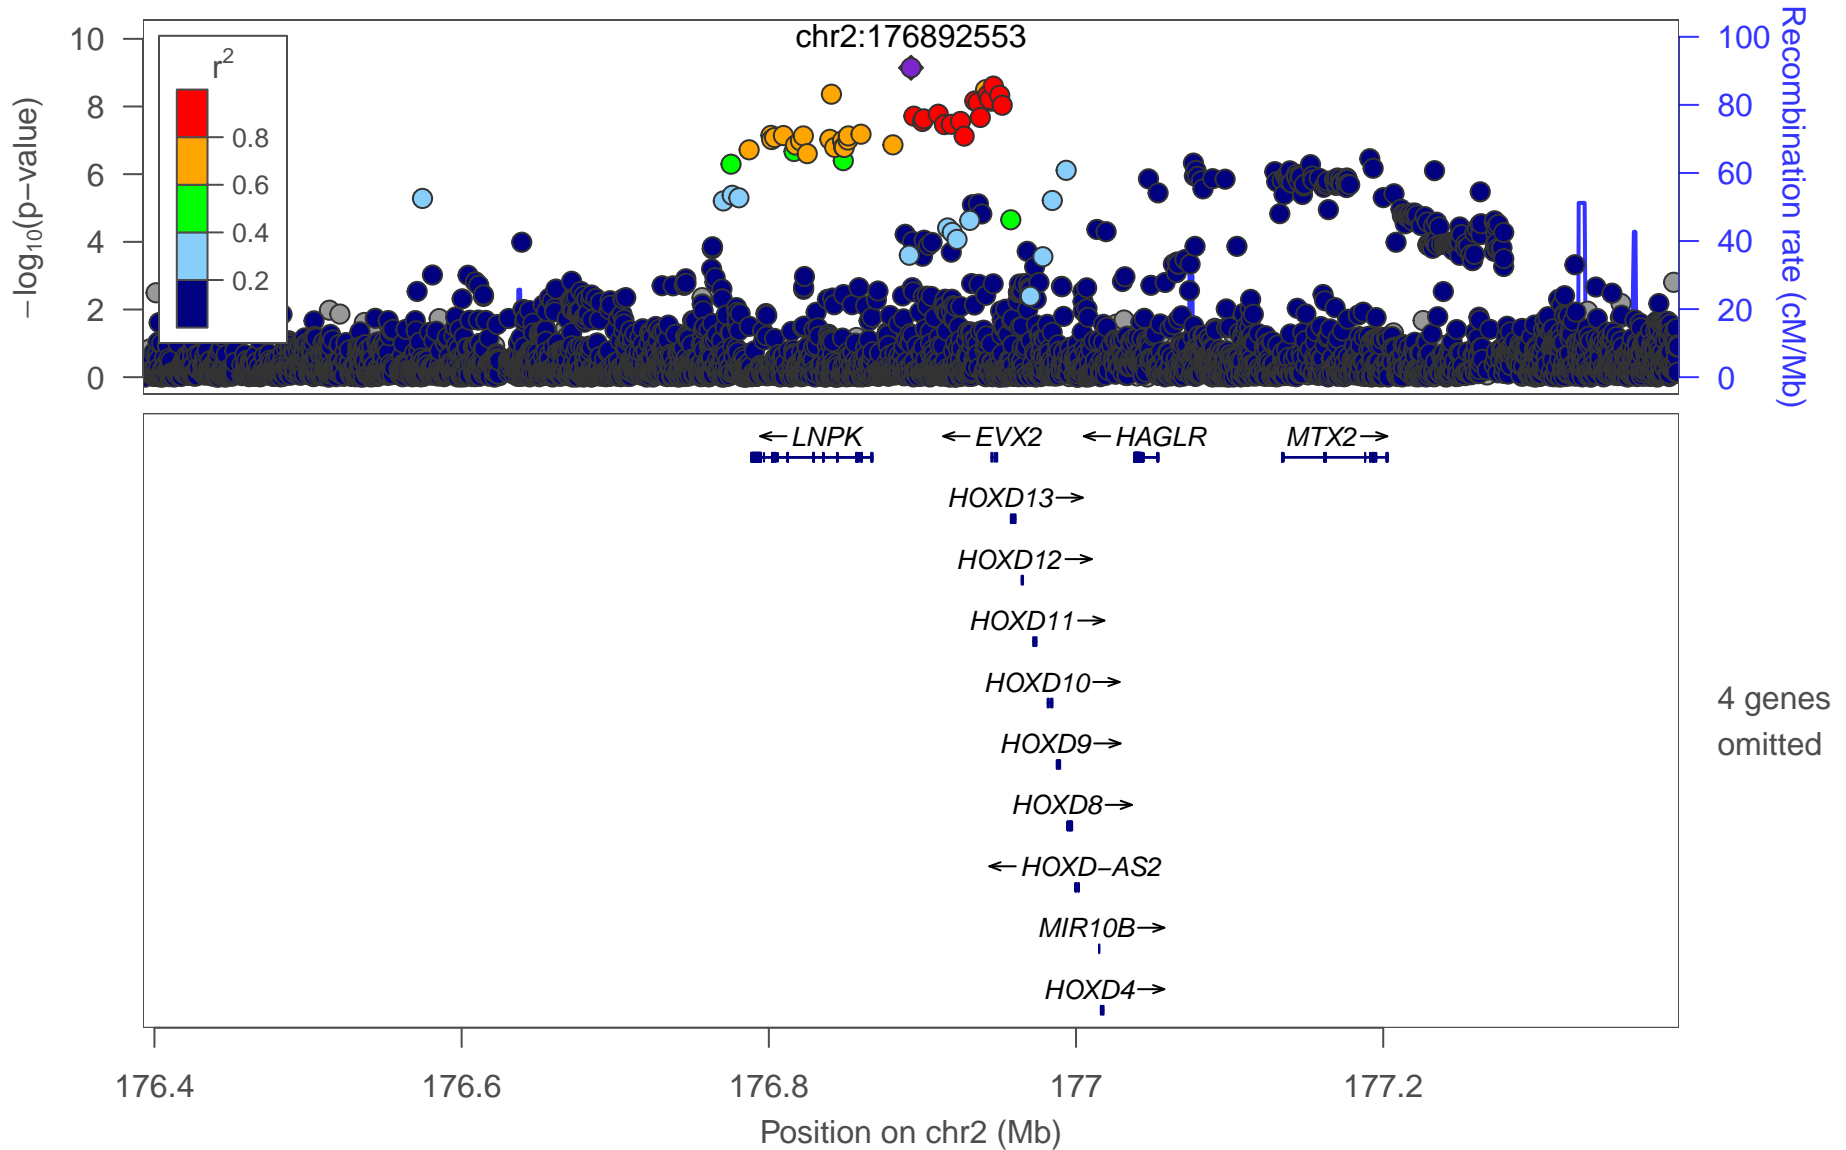

# 2\_16:Crea

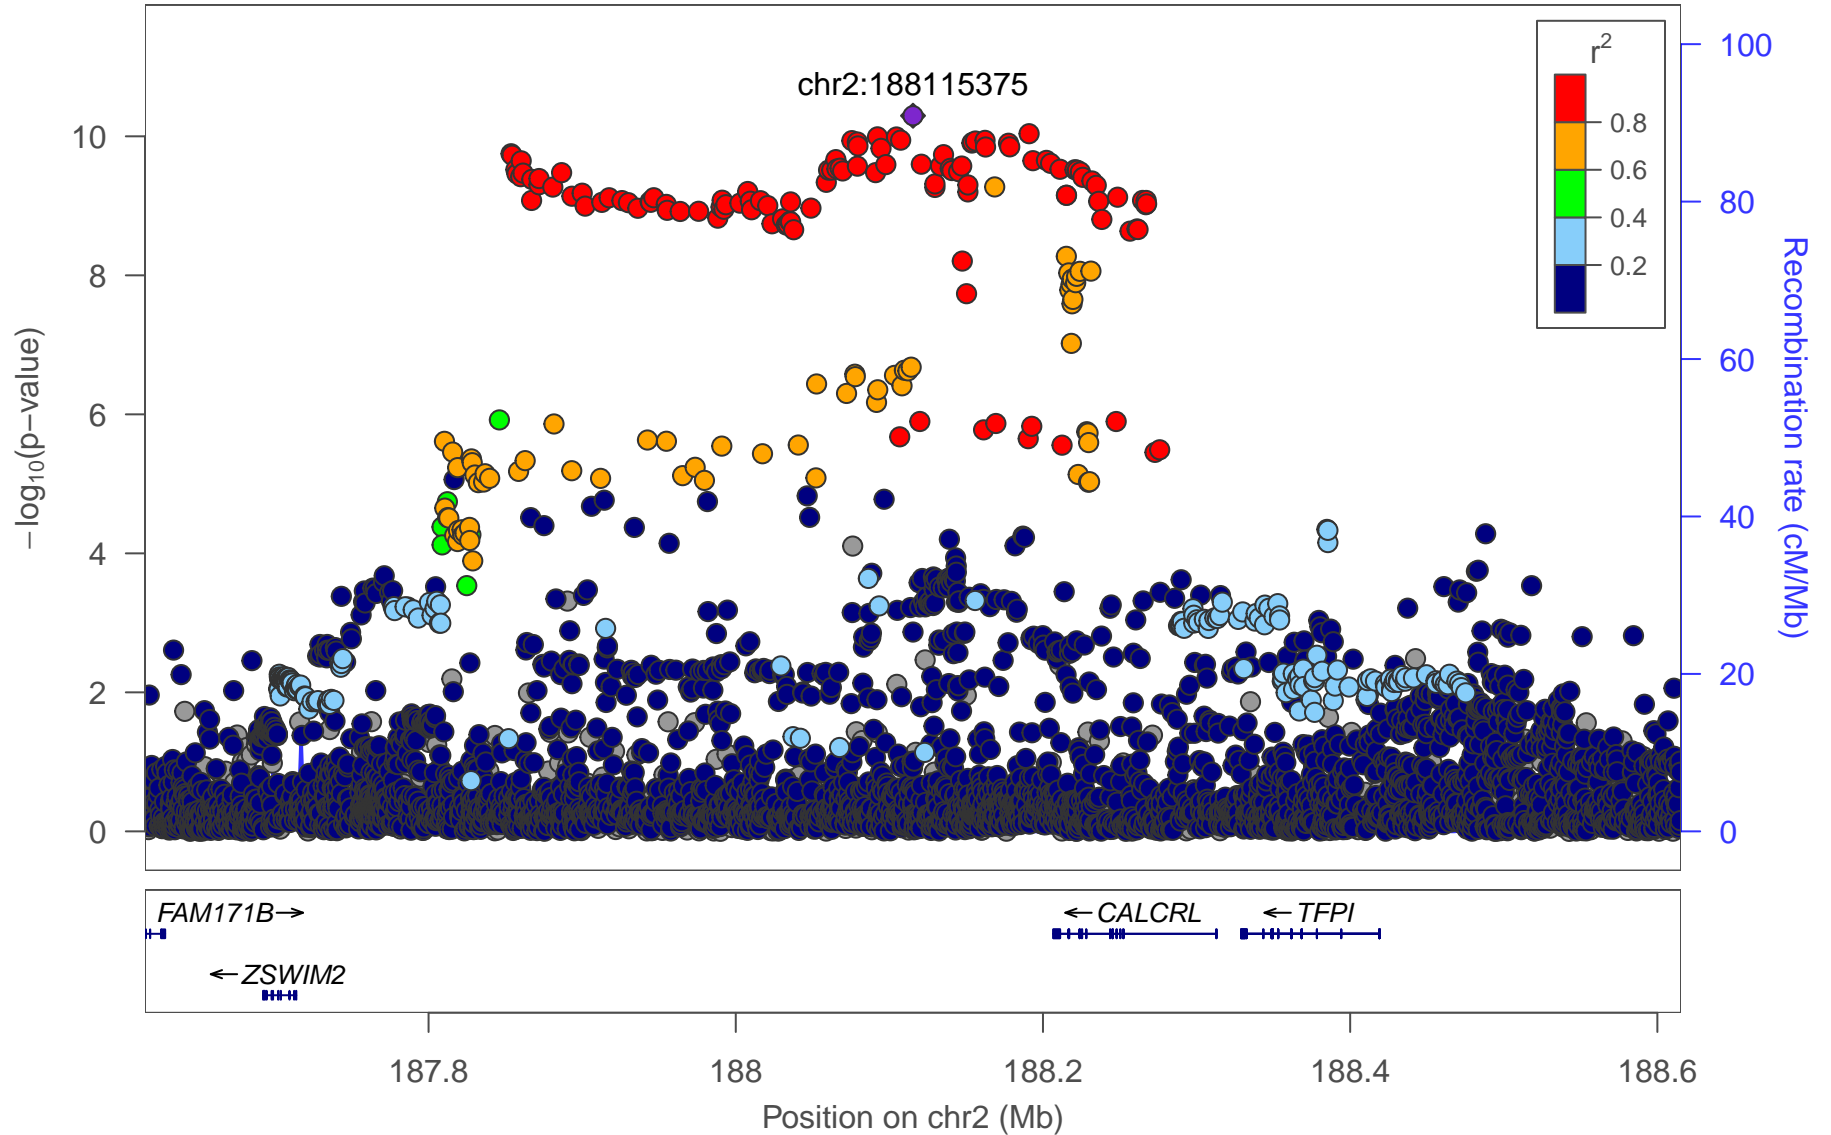

# 2\_17:Gln

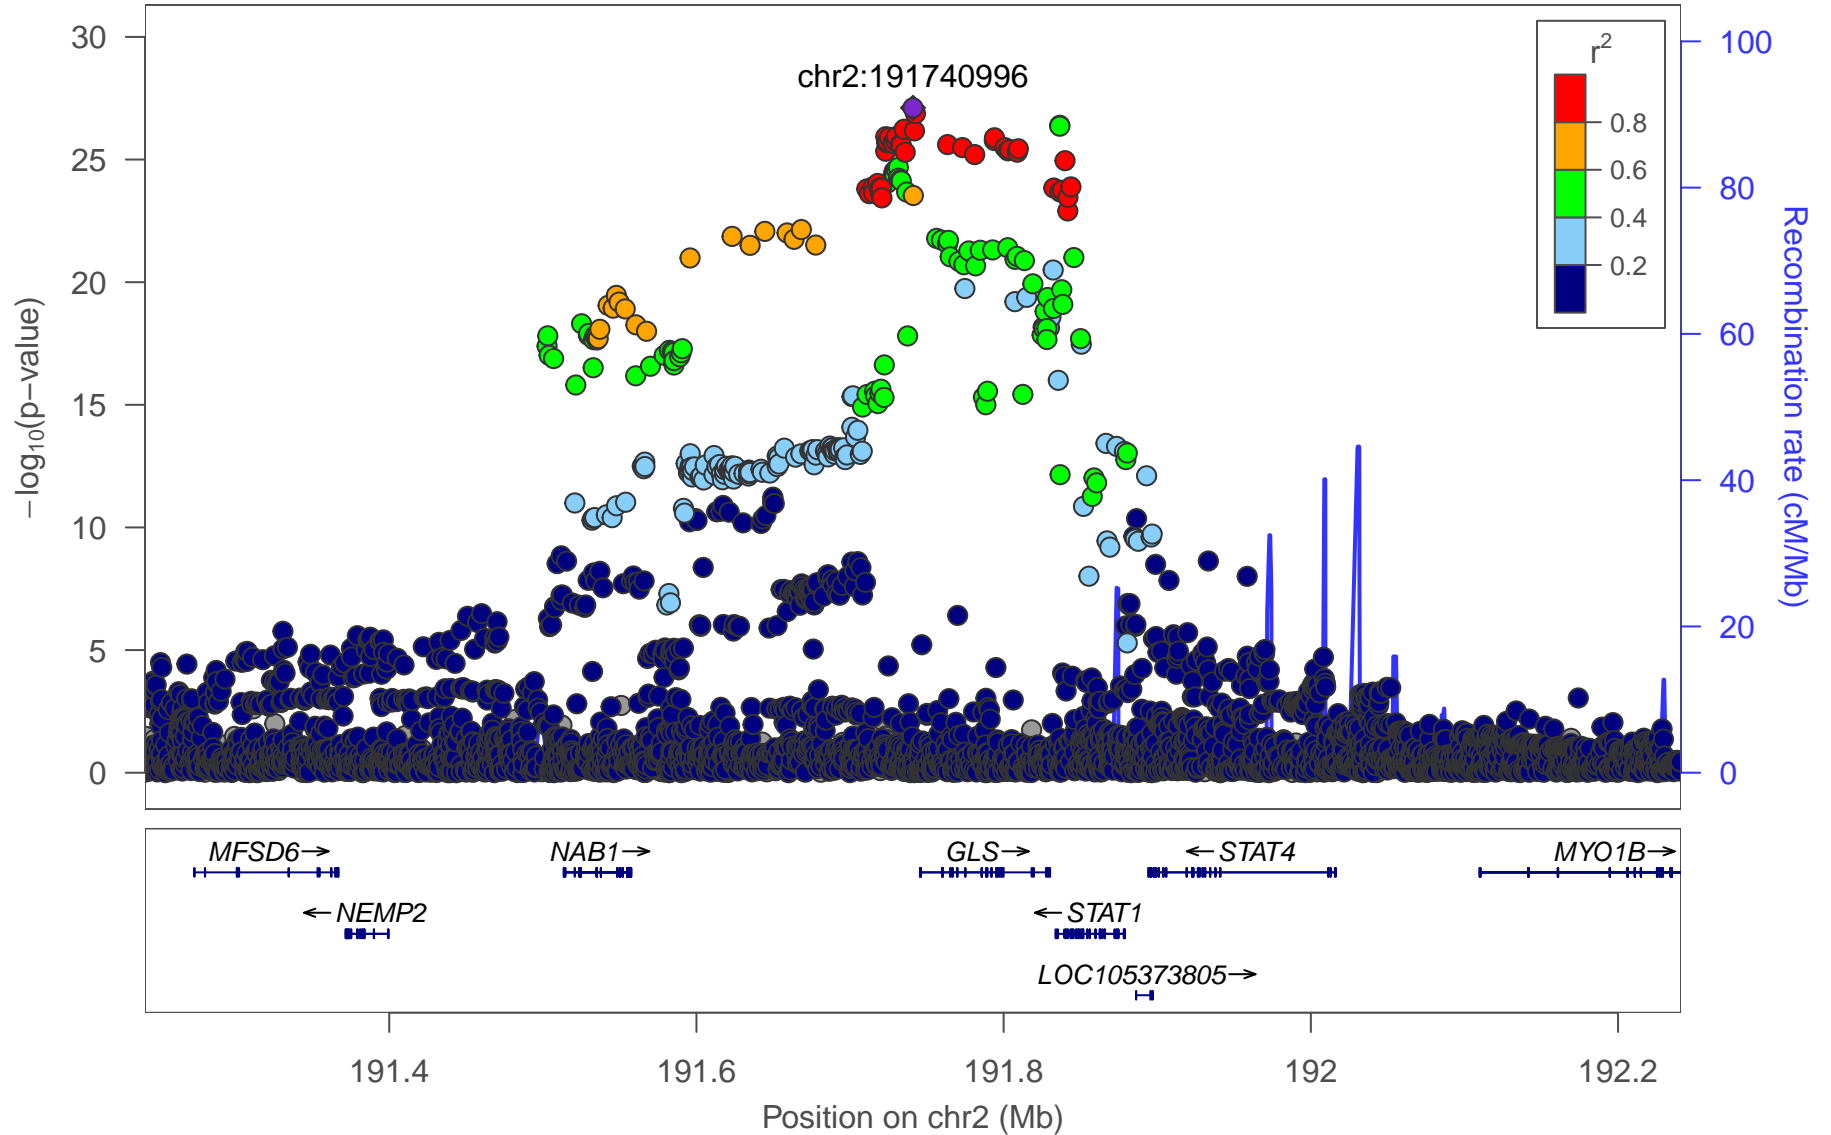

# 2\_18:Gln

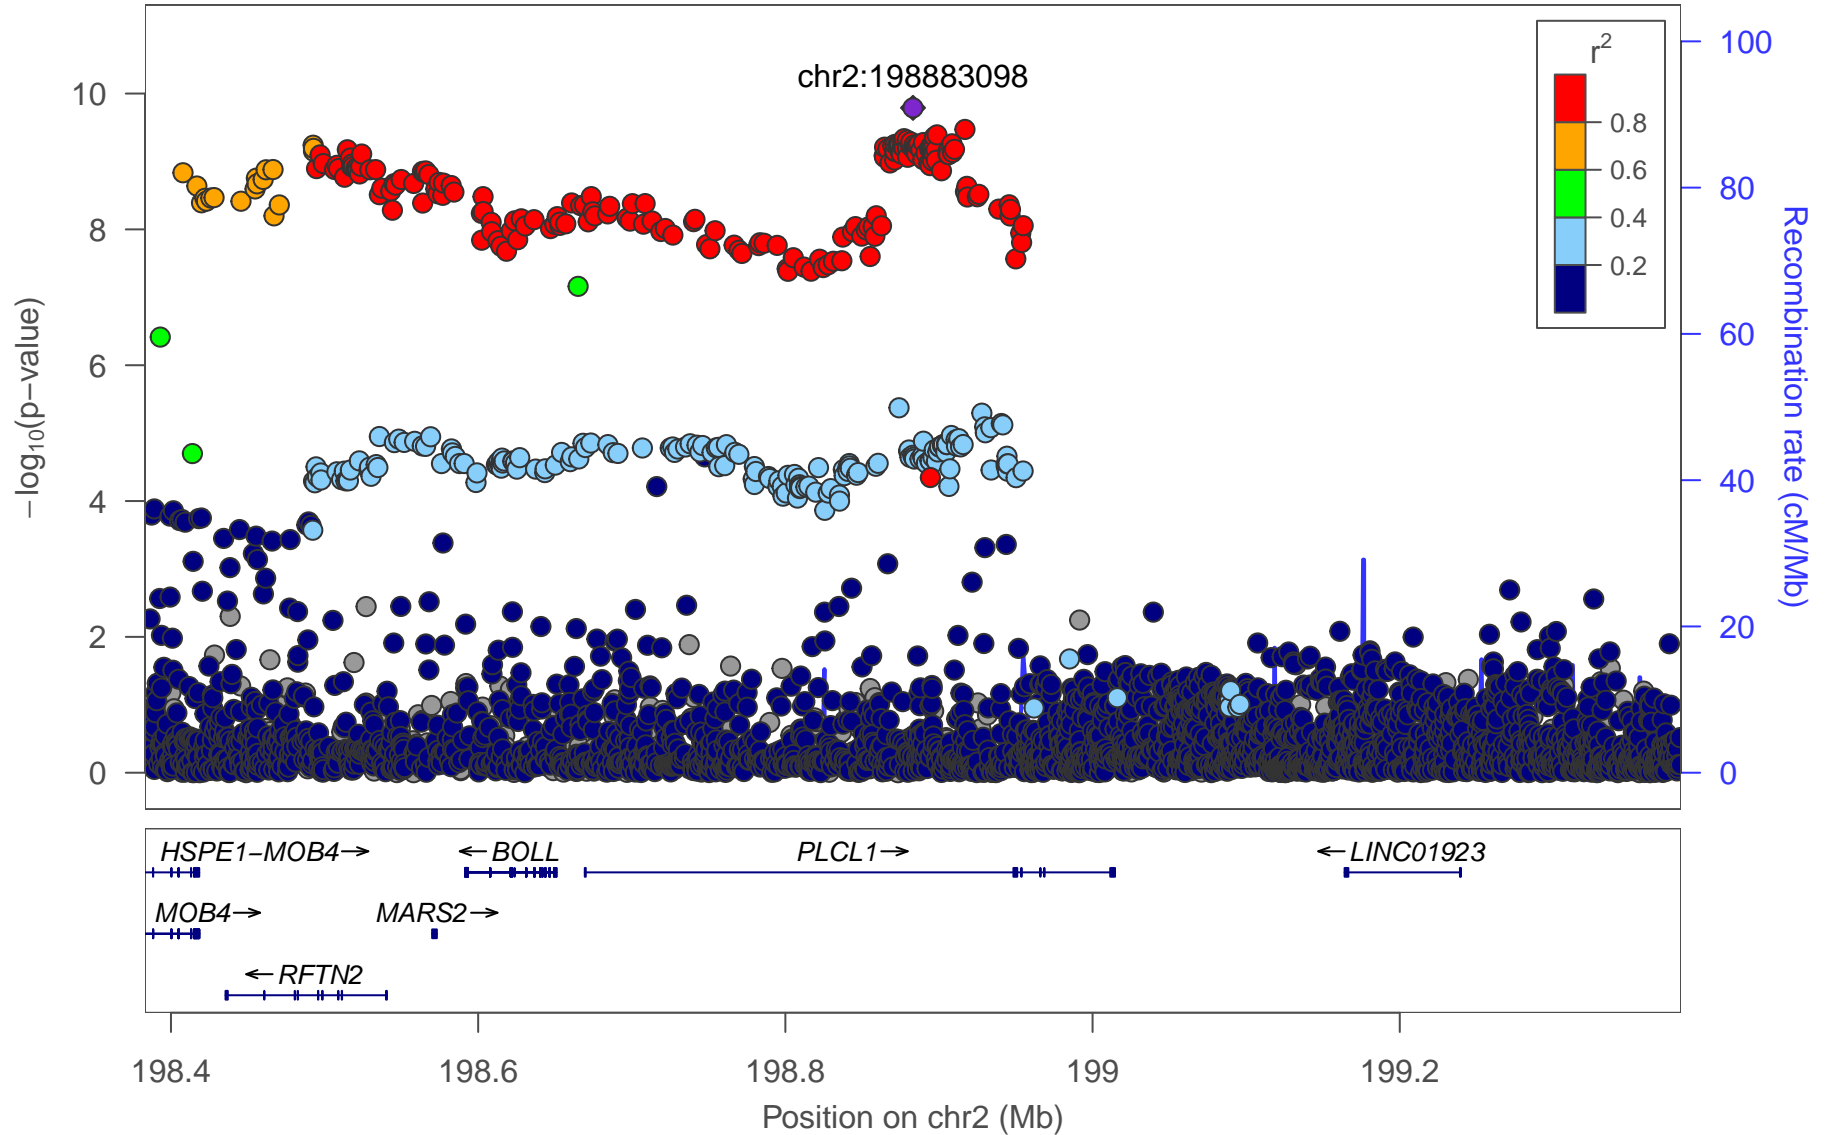

# 2\_19:PUFA

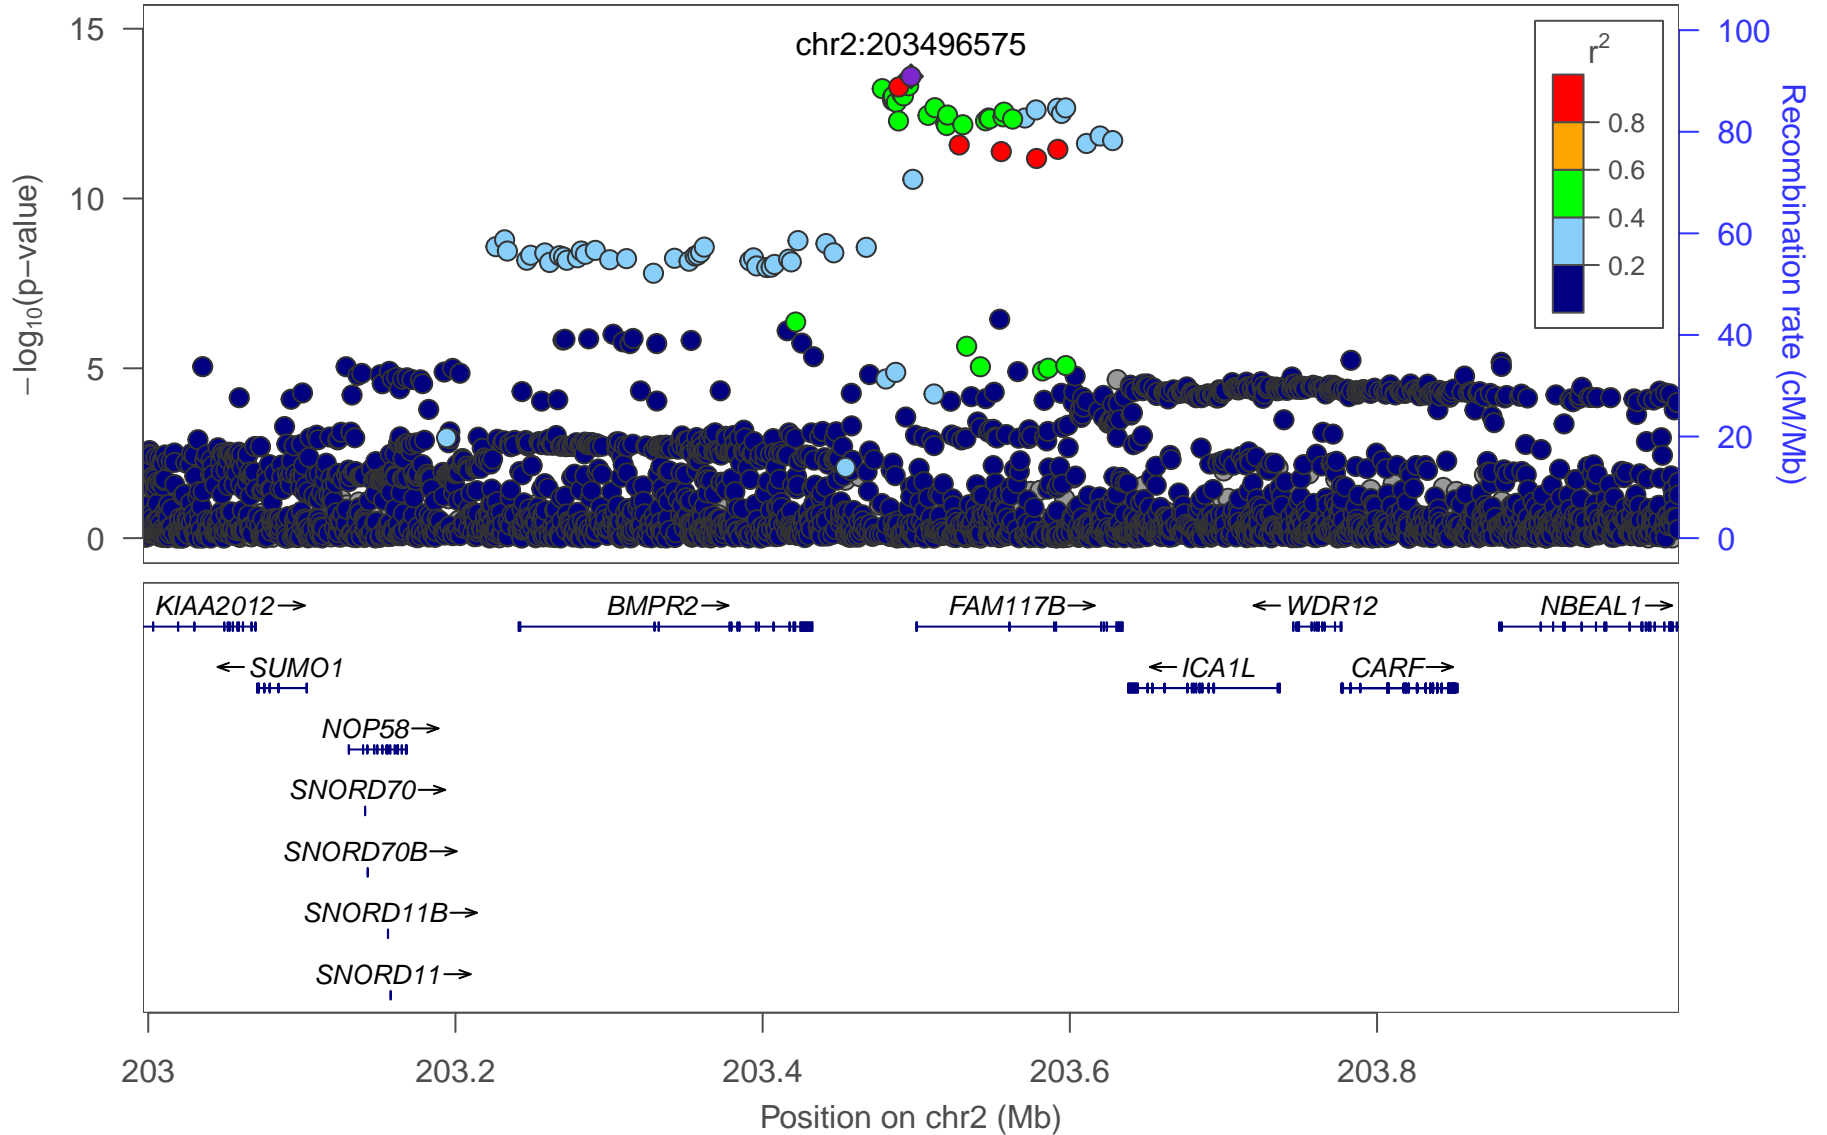

# 2\_20:Gly

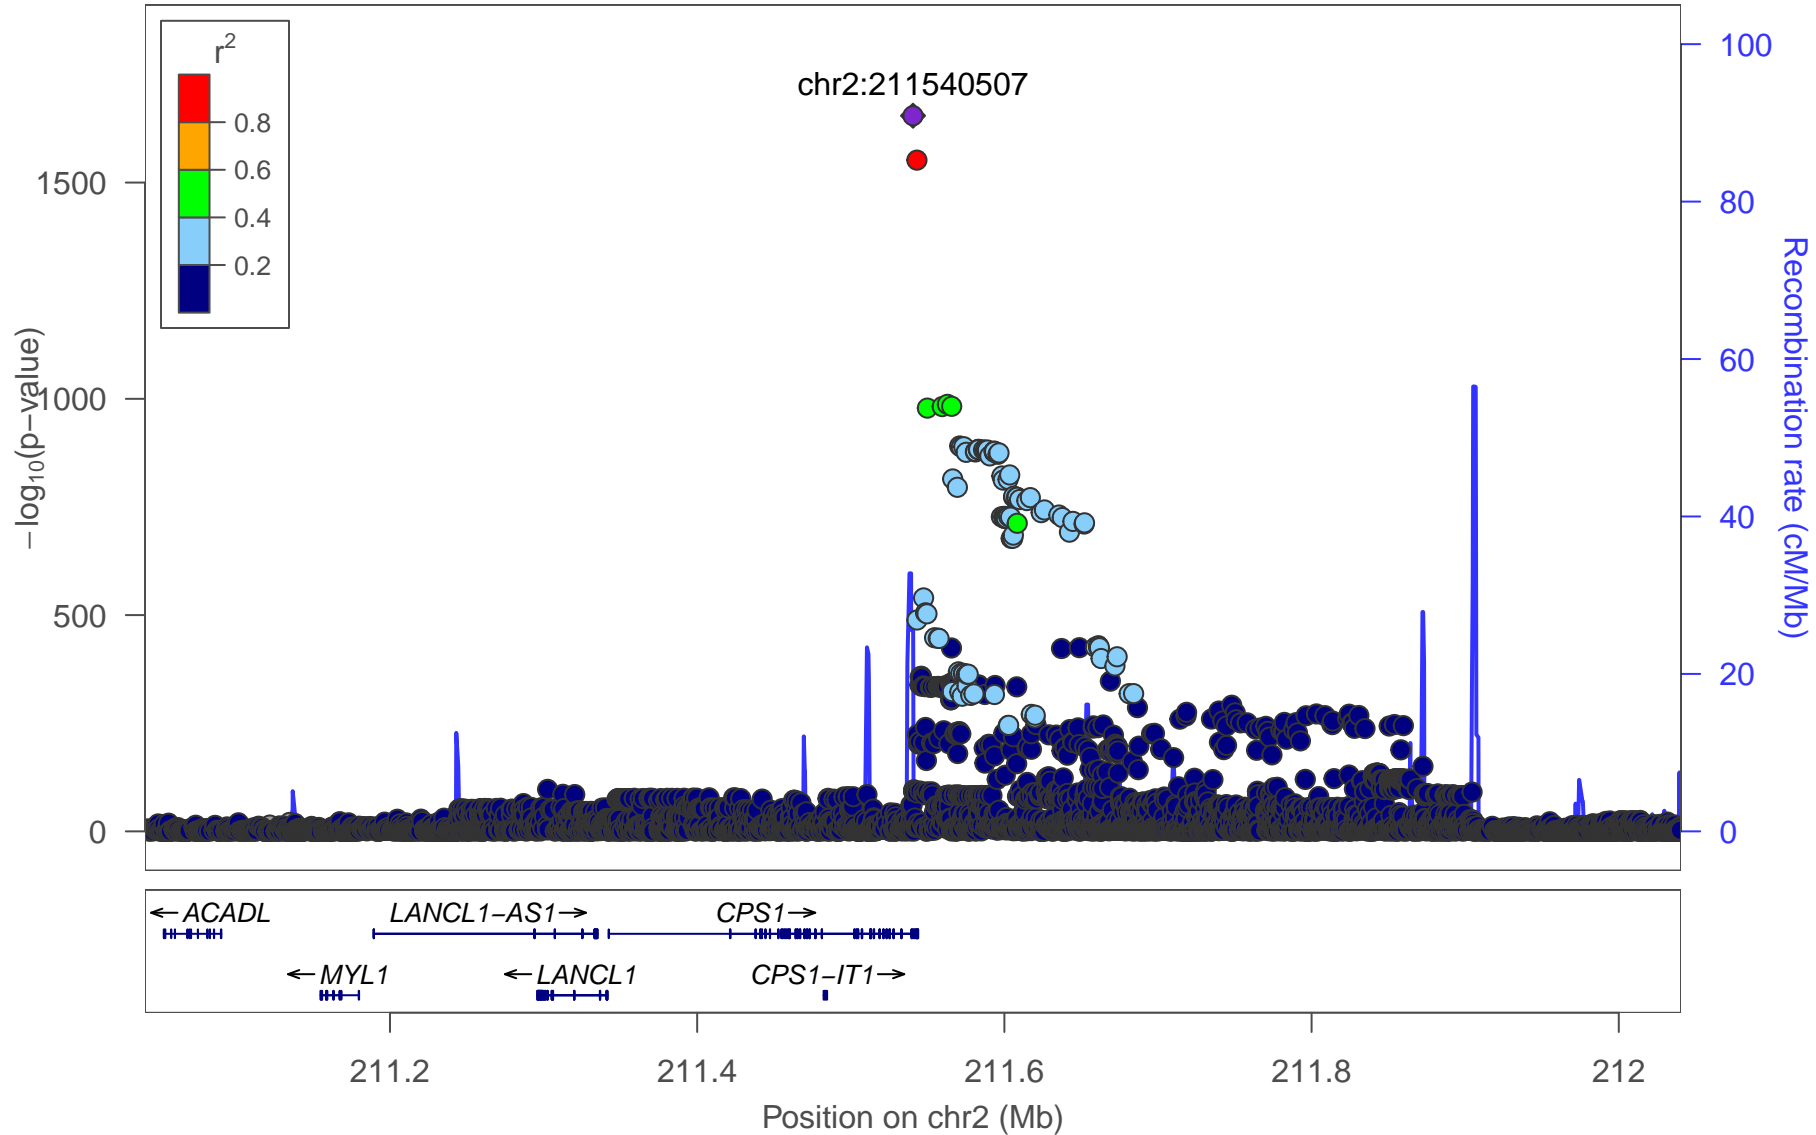



# 2\_21:Crea

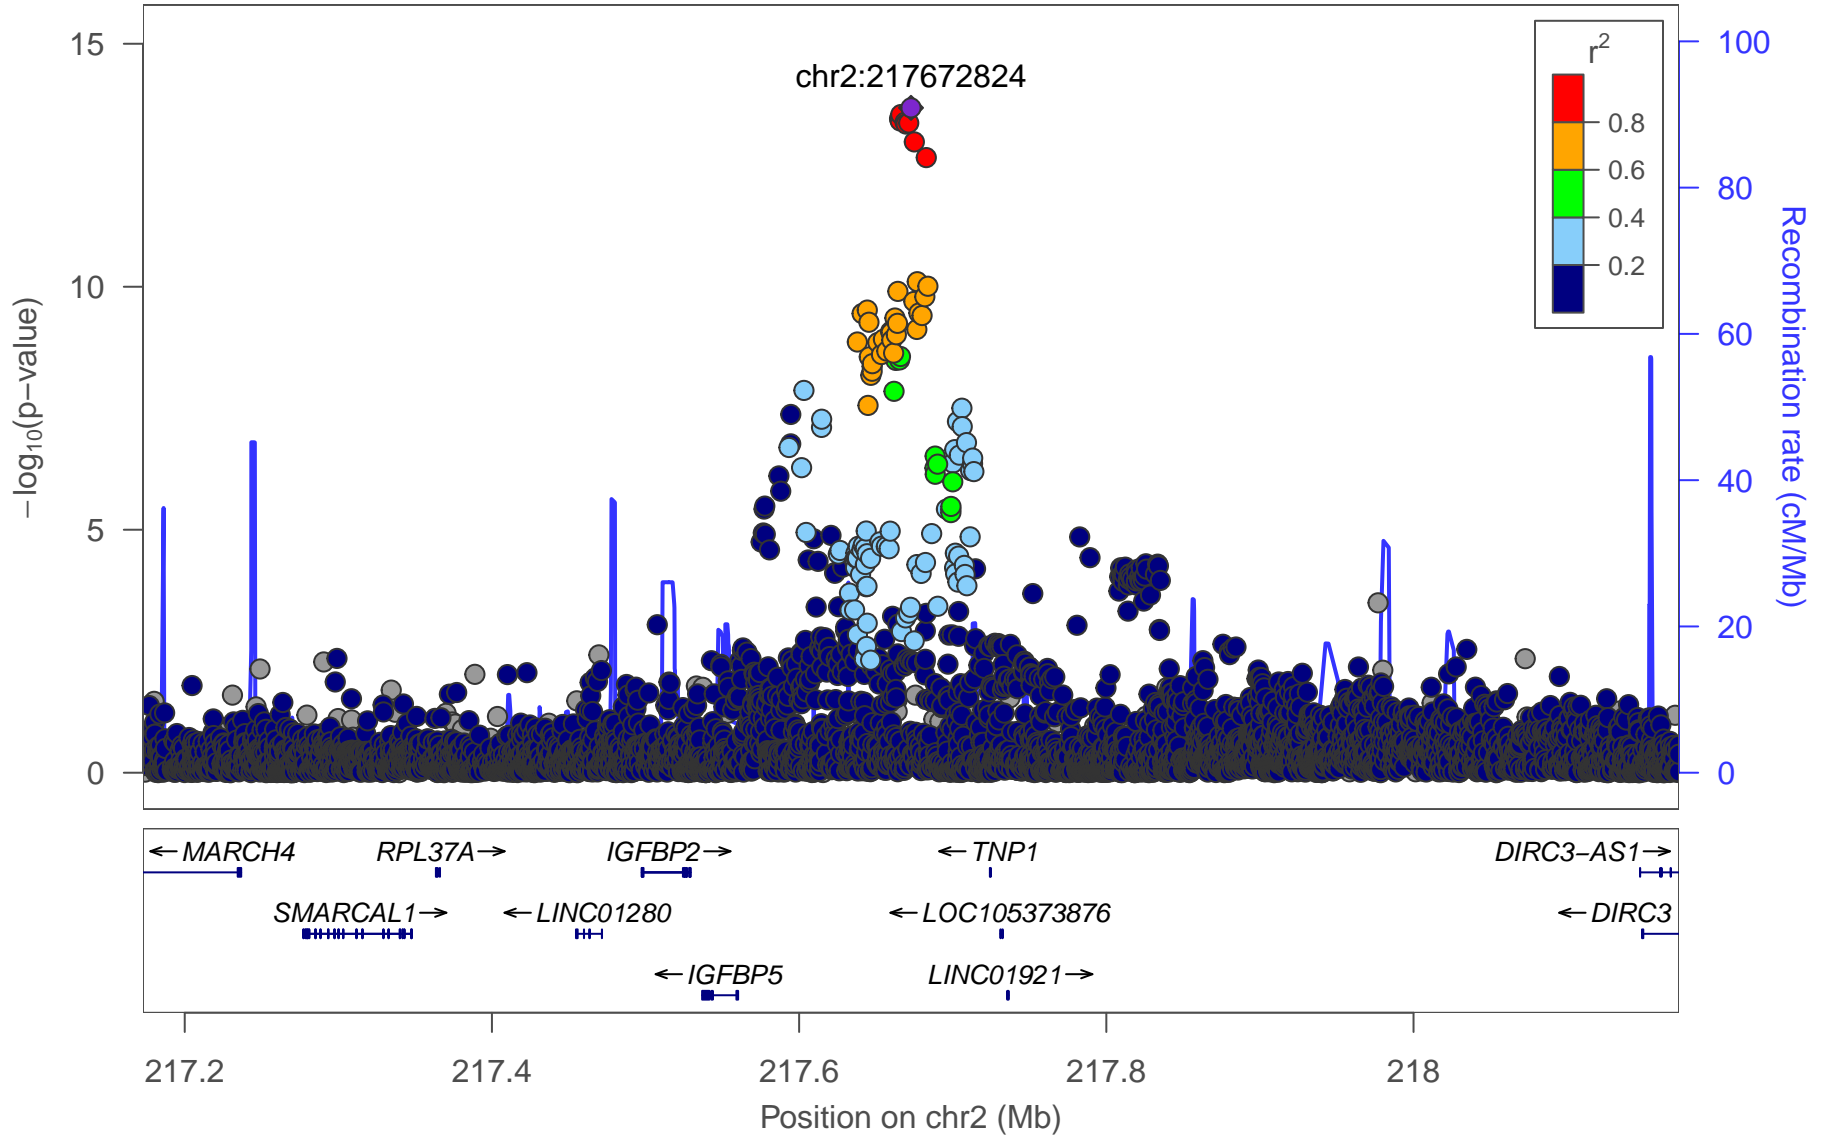

# 2\_22:M-VLDL-TG

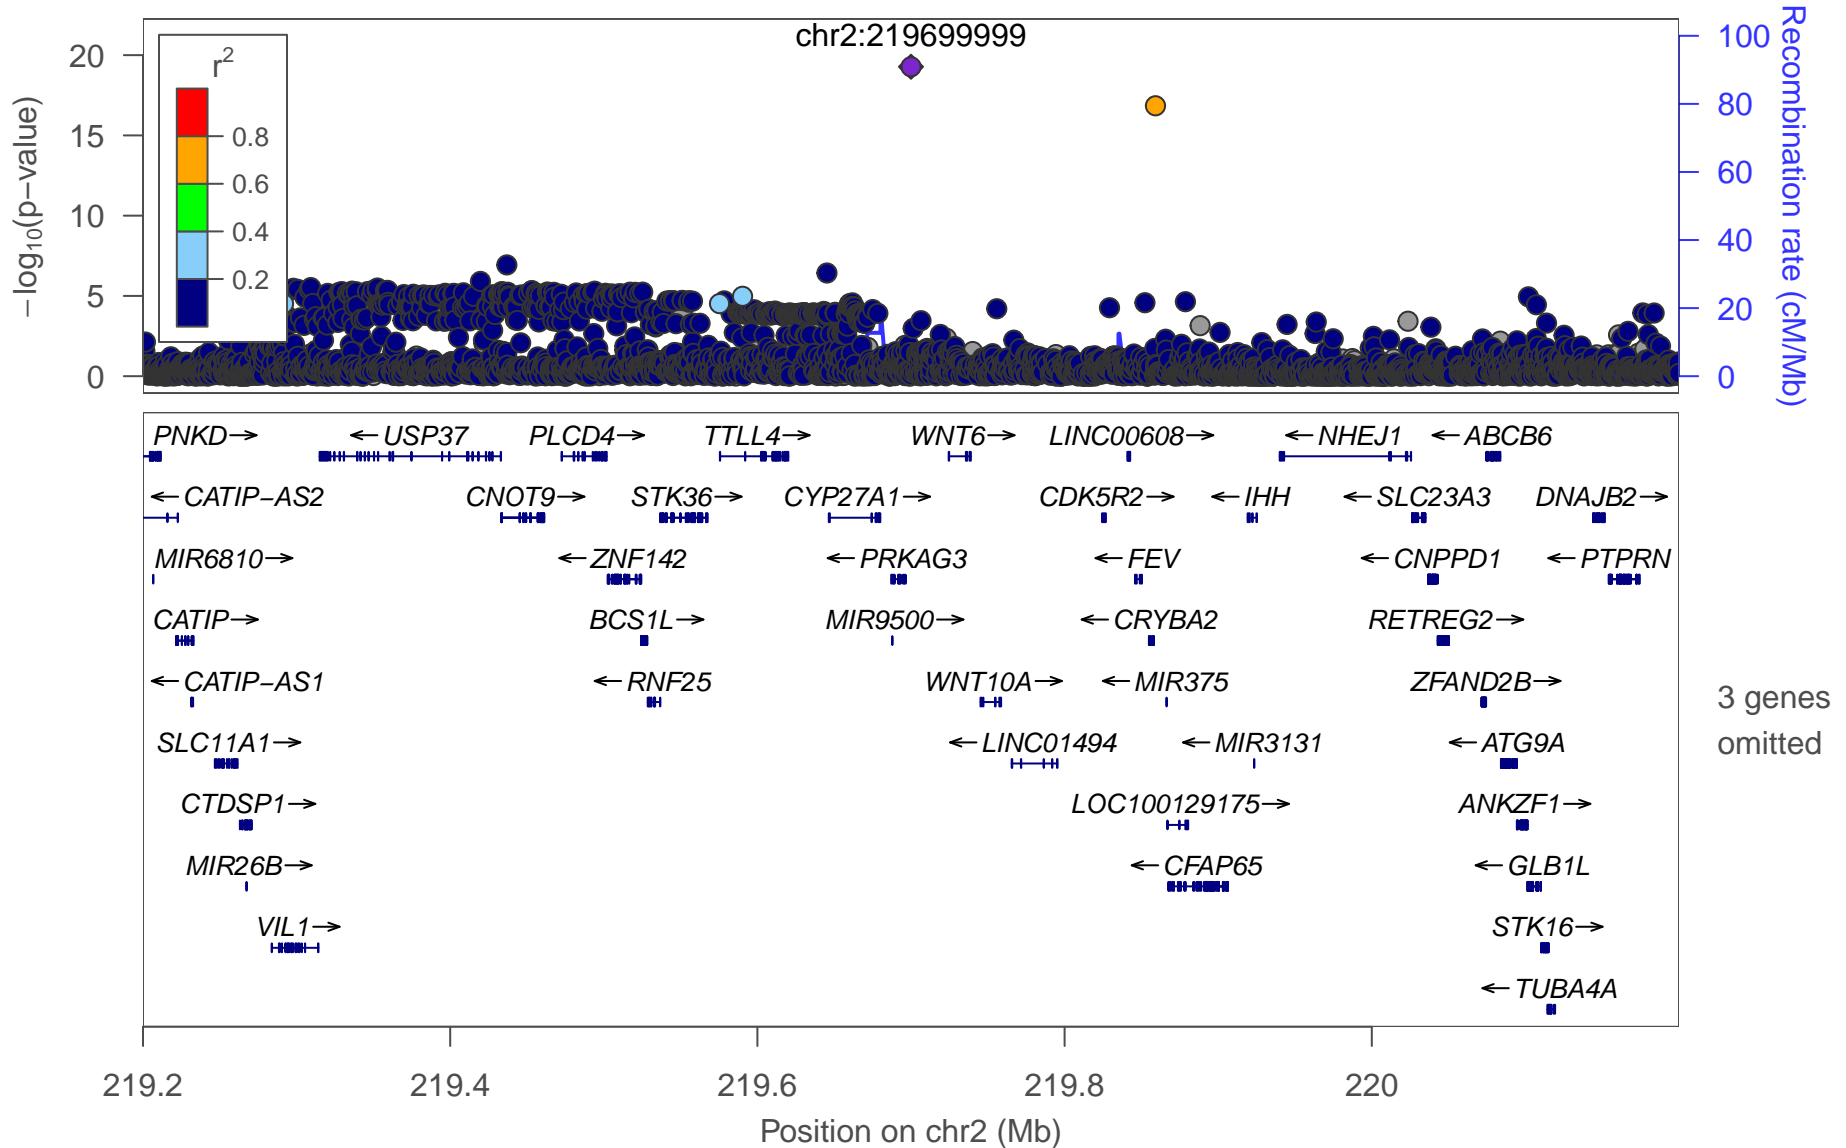

# 2\_23:XL-HDL-PL

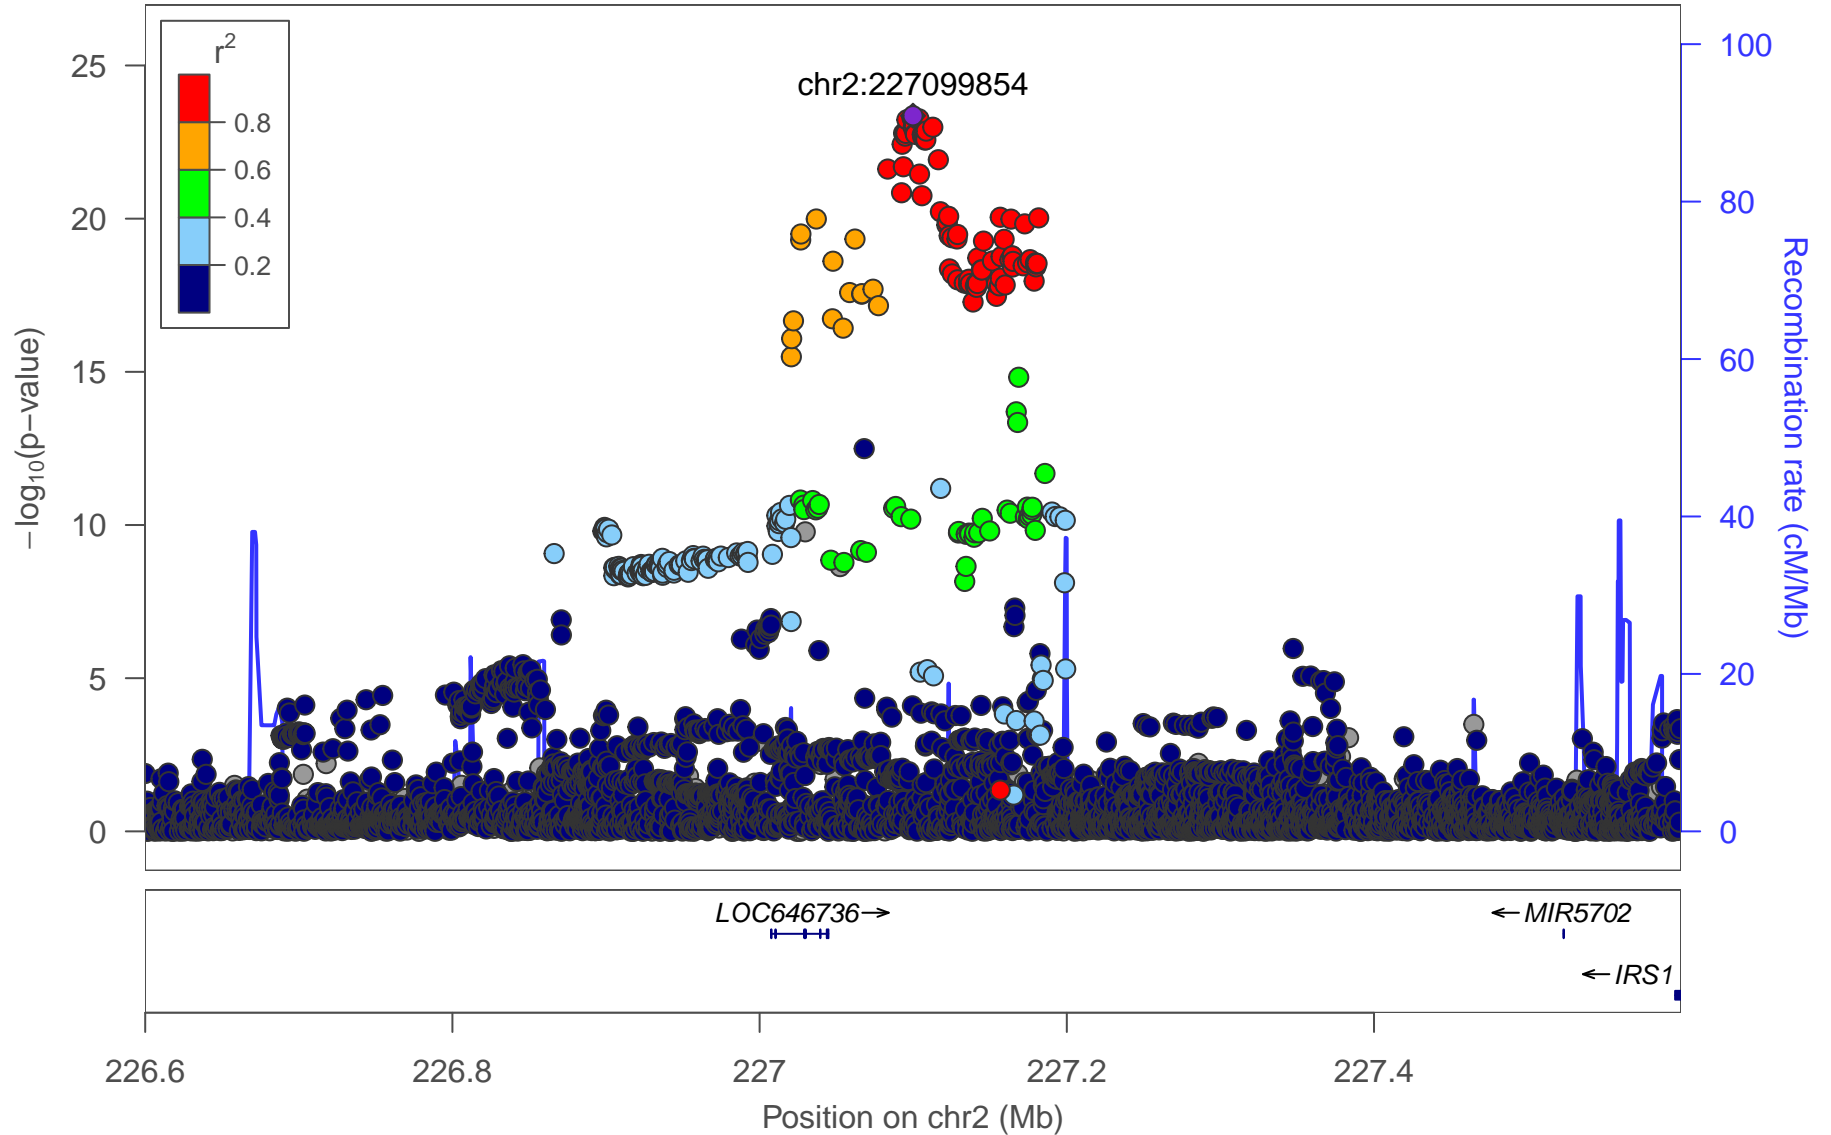

# 3\_1:EstC

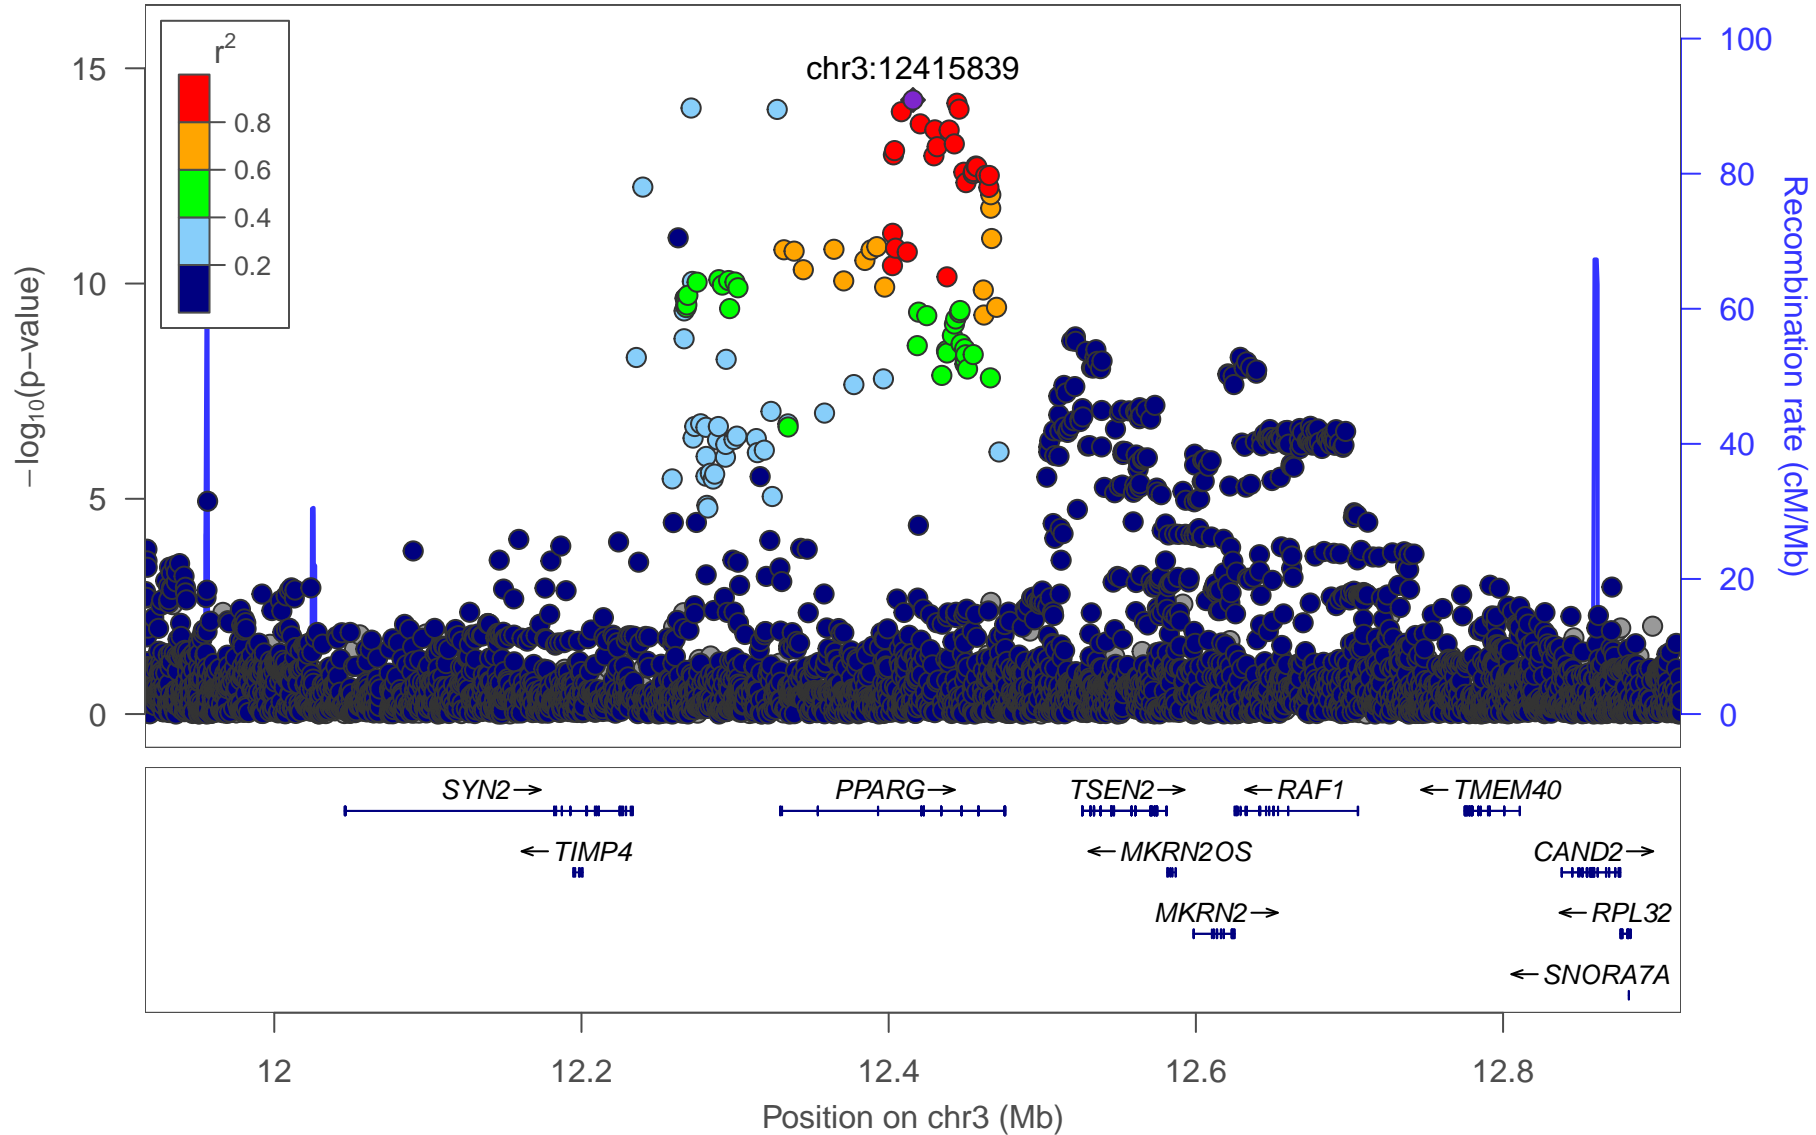

# 3\_2:Ala

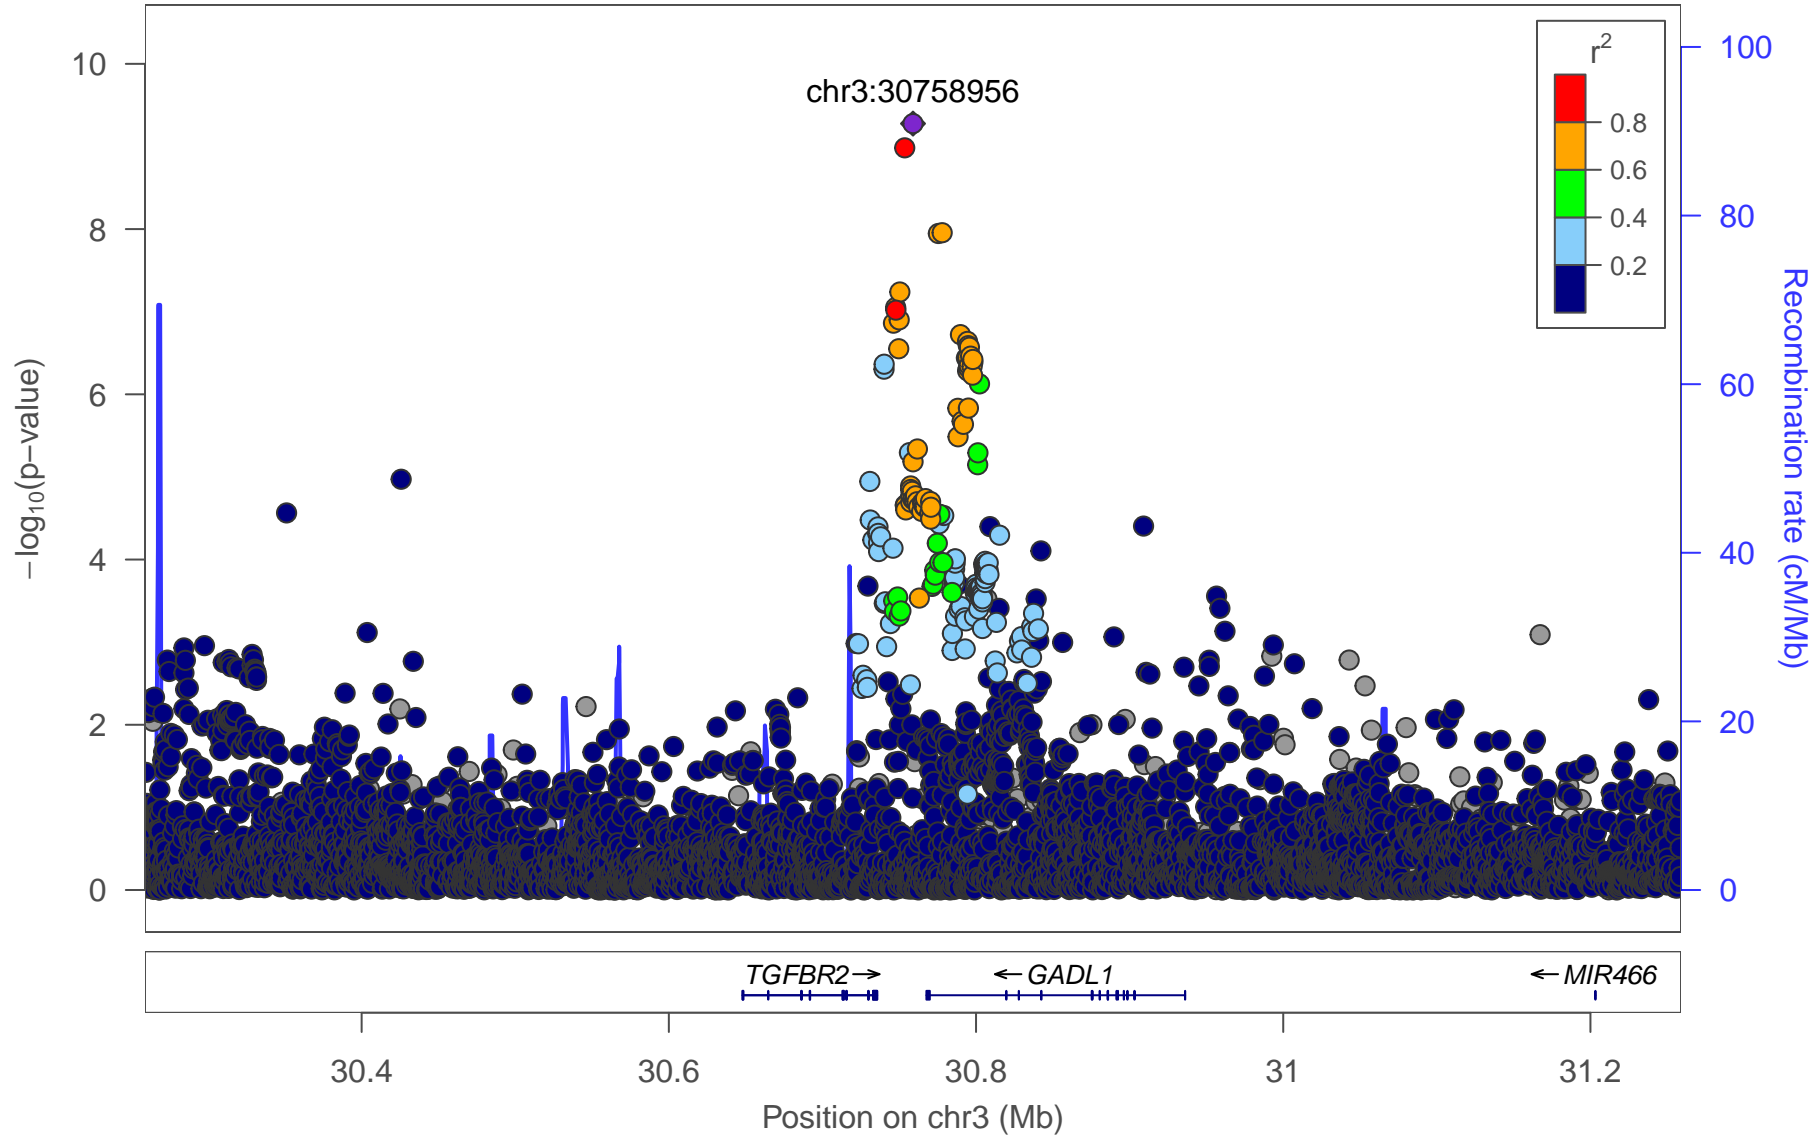

# 3\_3:Crea

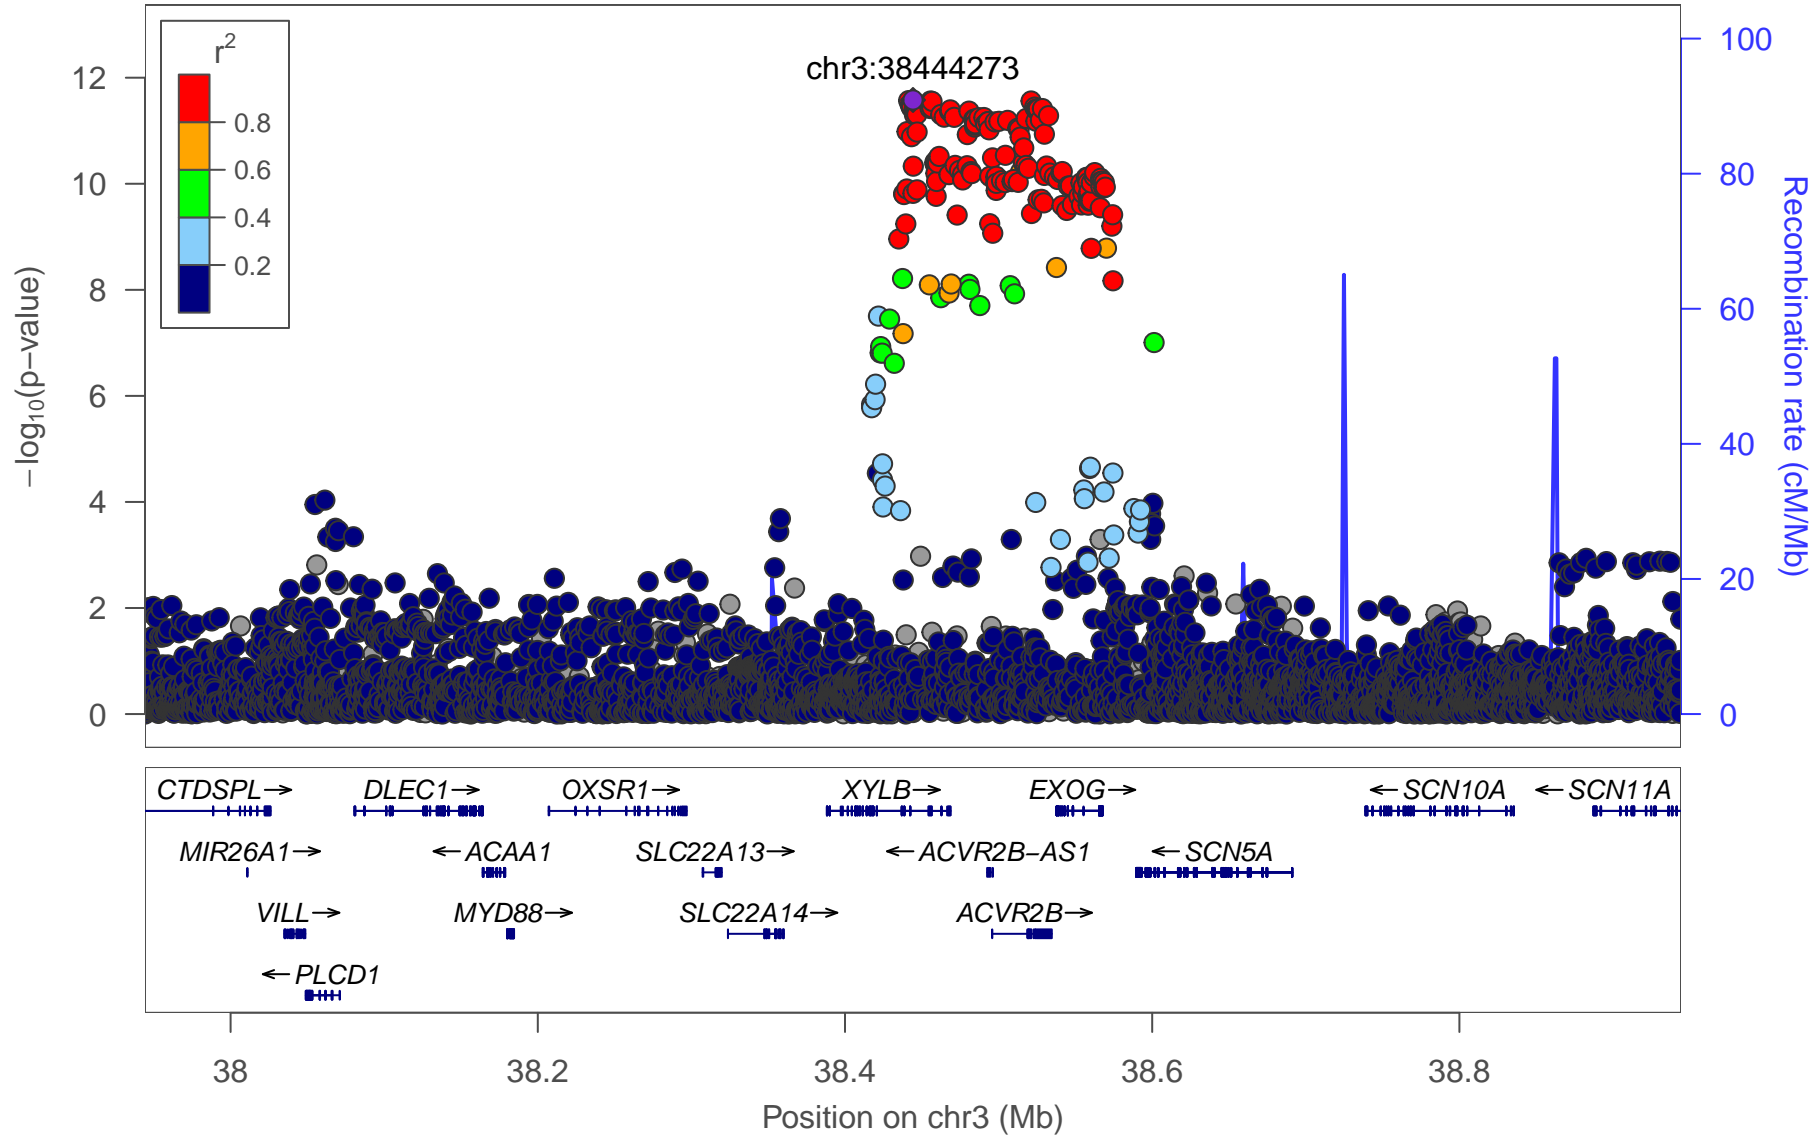

# 3\_4:Crea

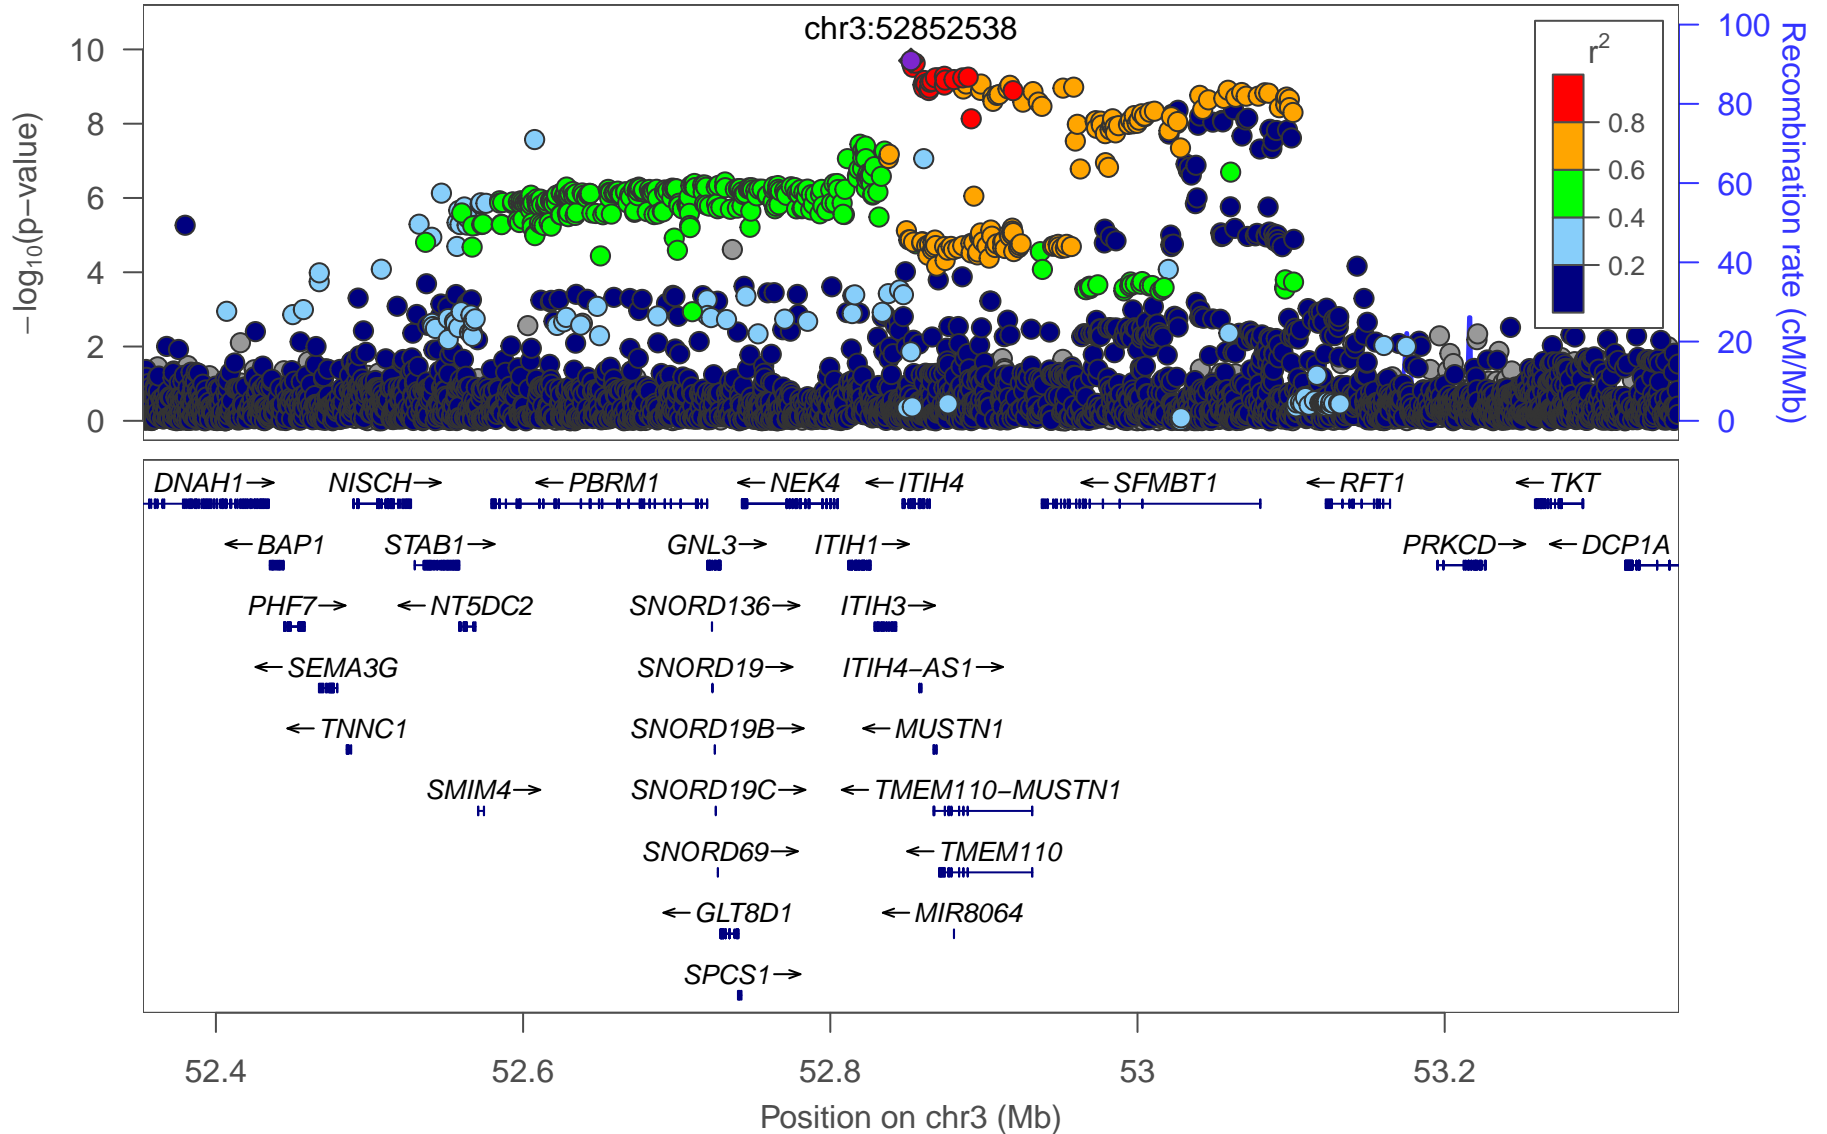

# 3\_5:Serum-TG

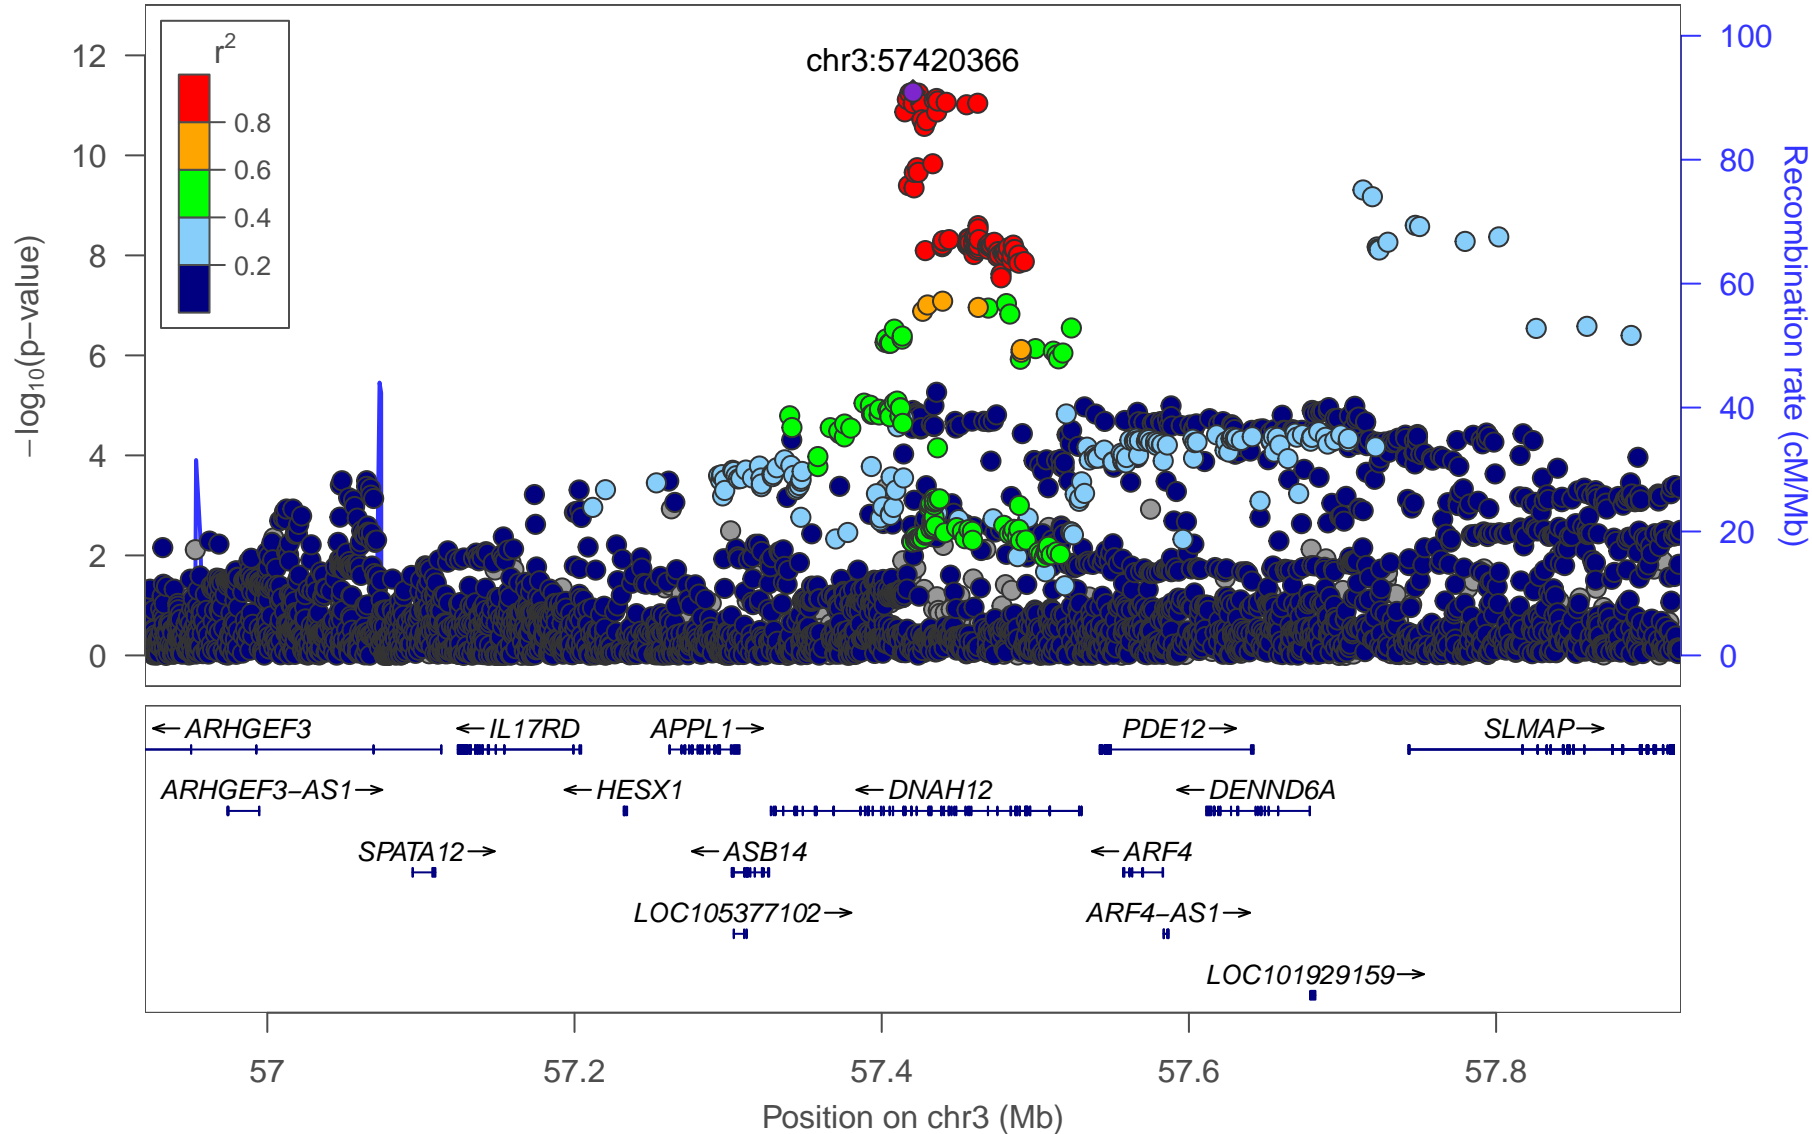



# 3\_6:S-HDL-P

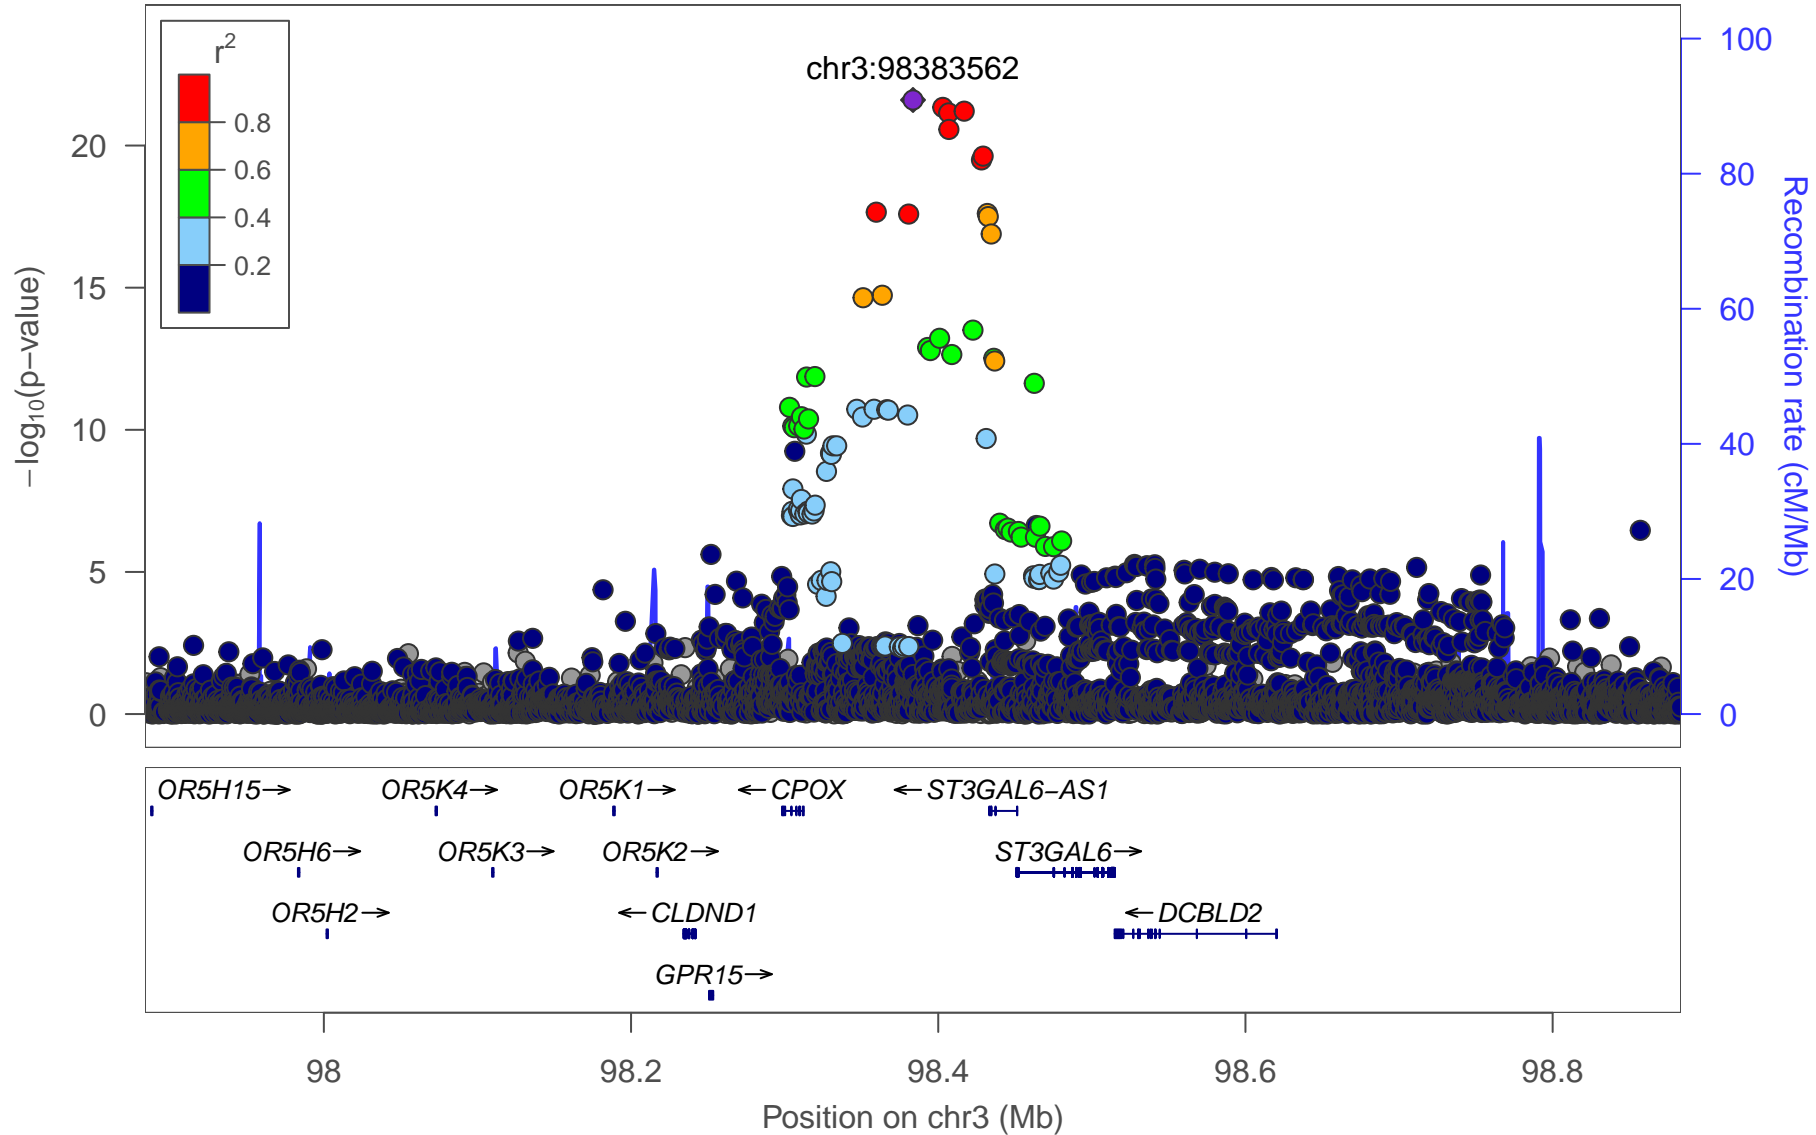

# 3\_7:ApoA1

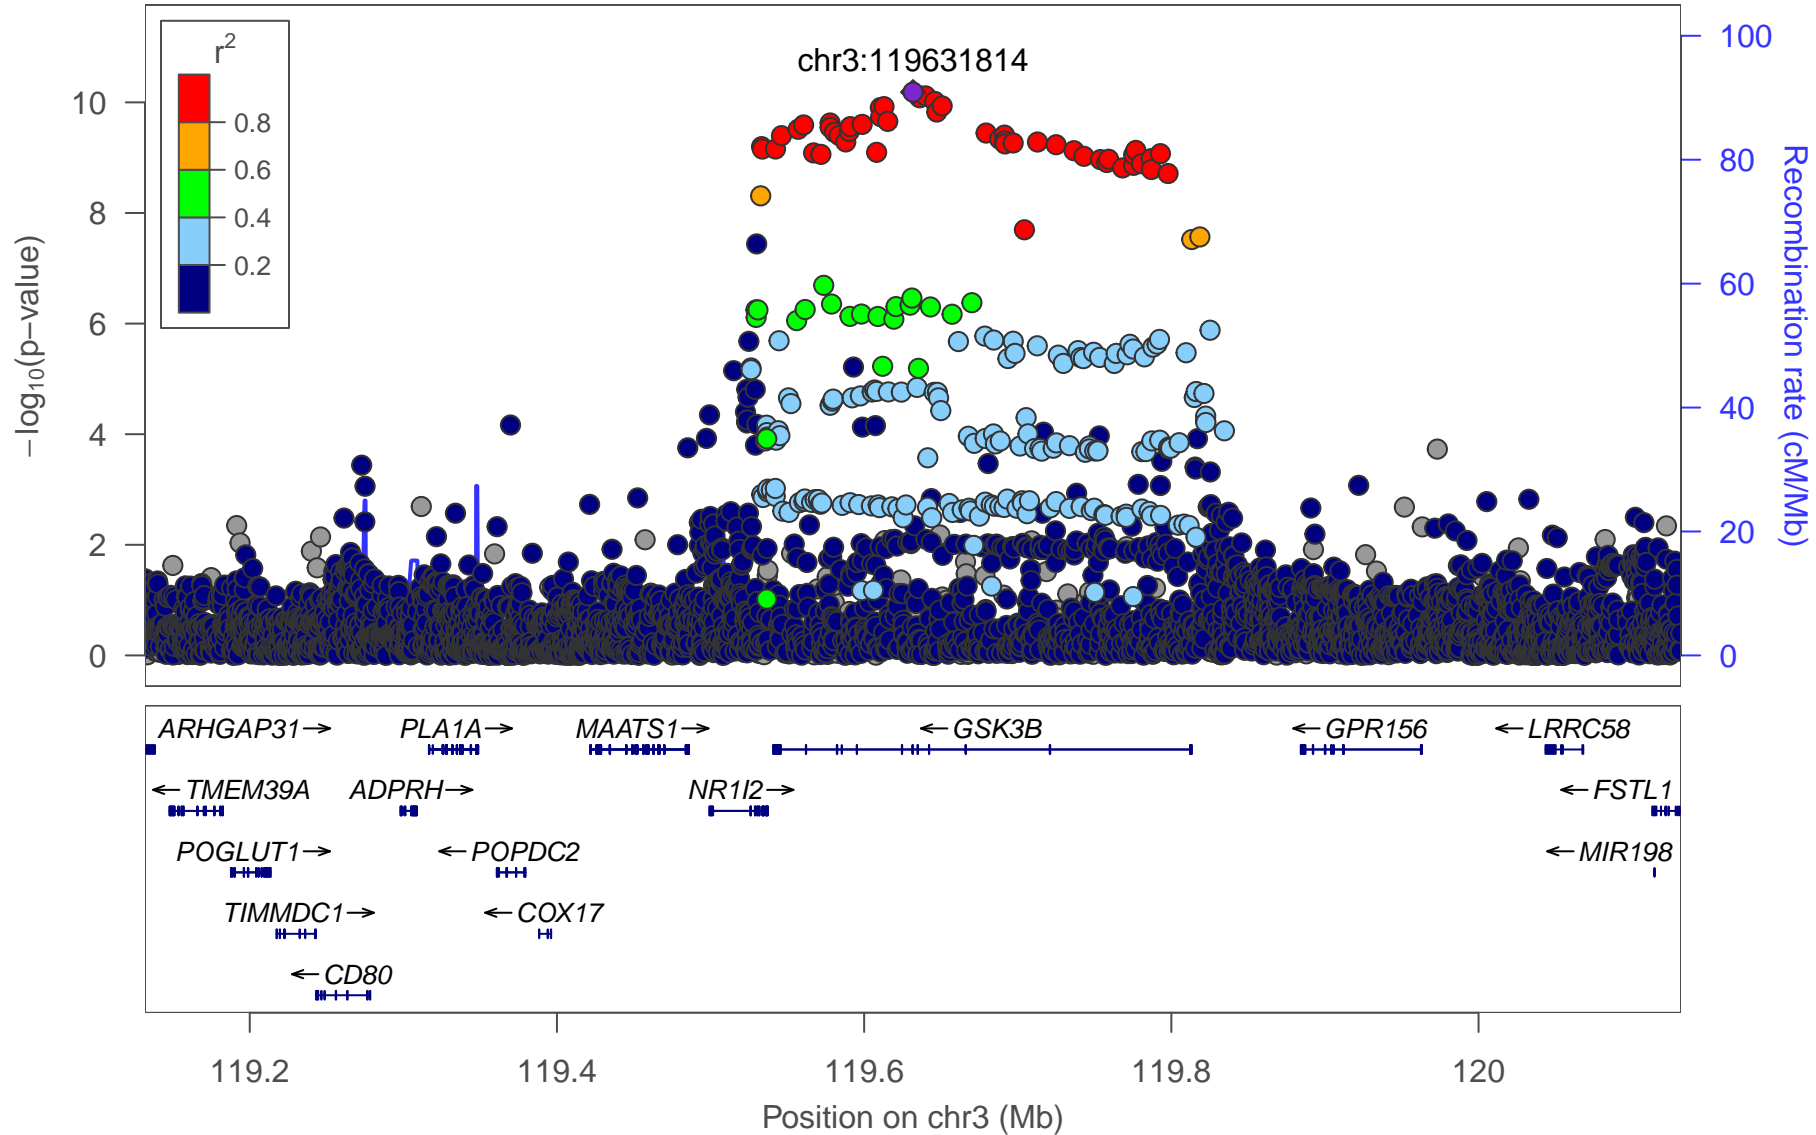

# 3\_8:Ala

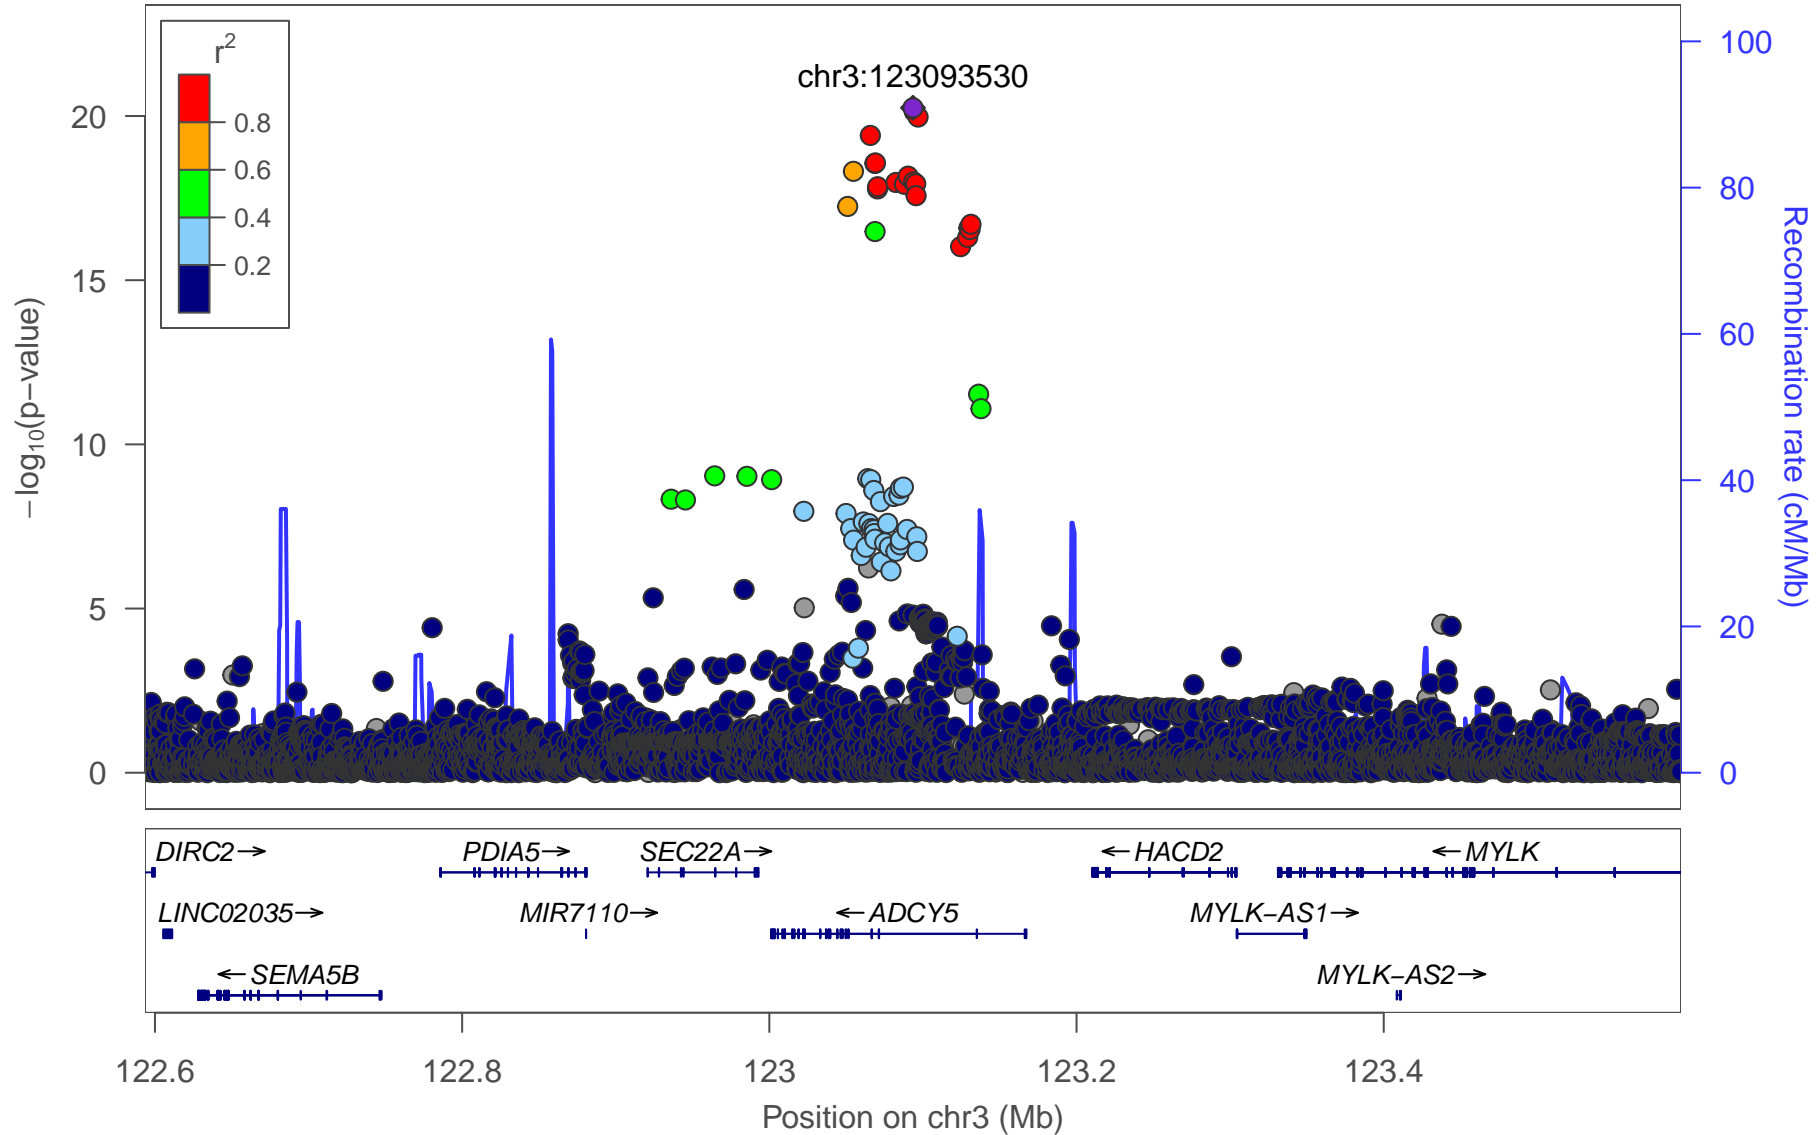

# 3\_9:Gly

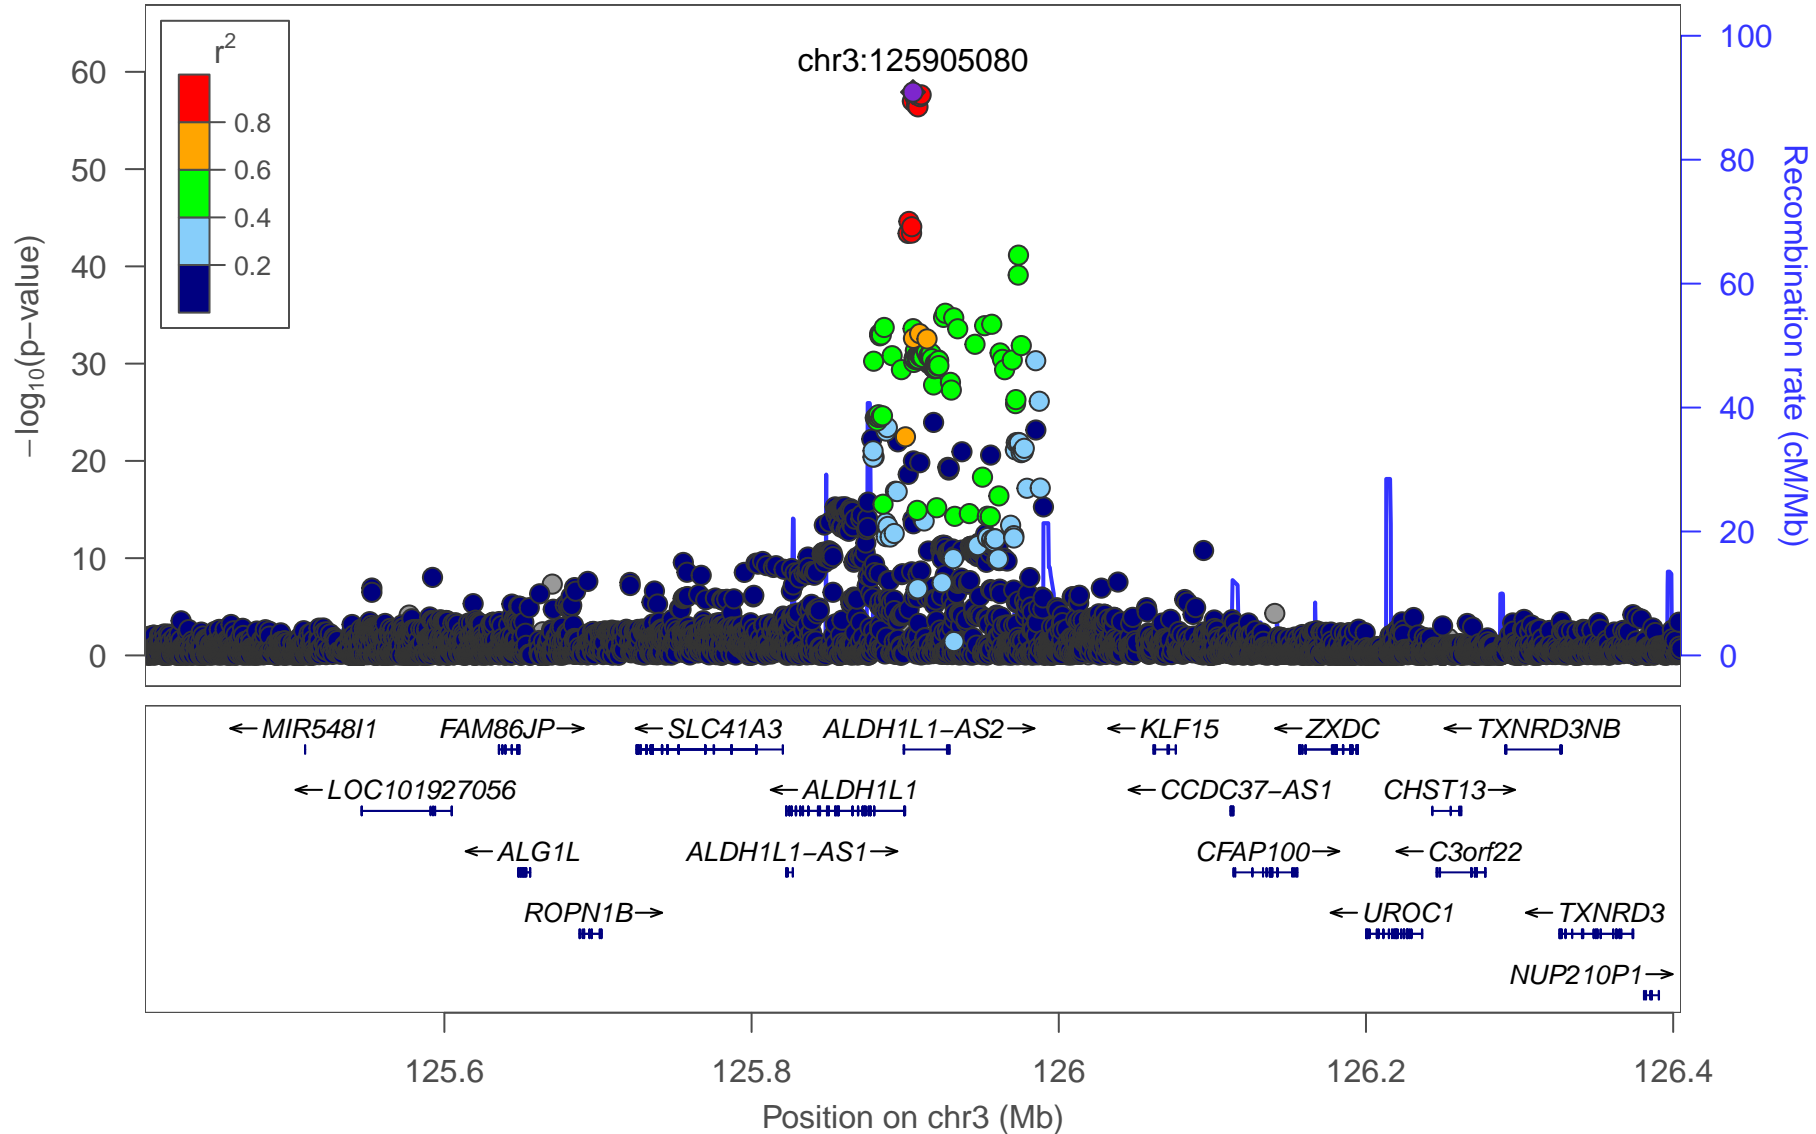

# 3\_10:LDL-D

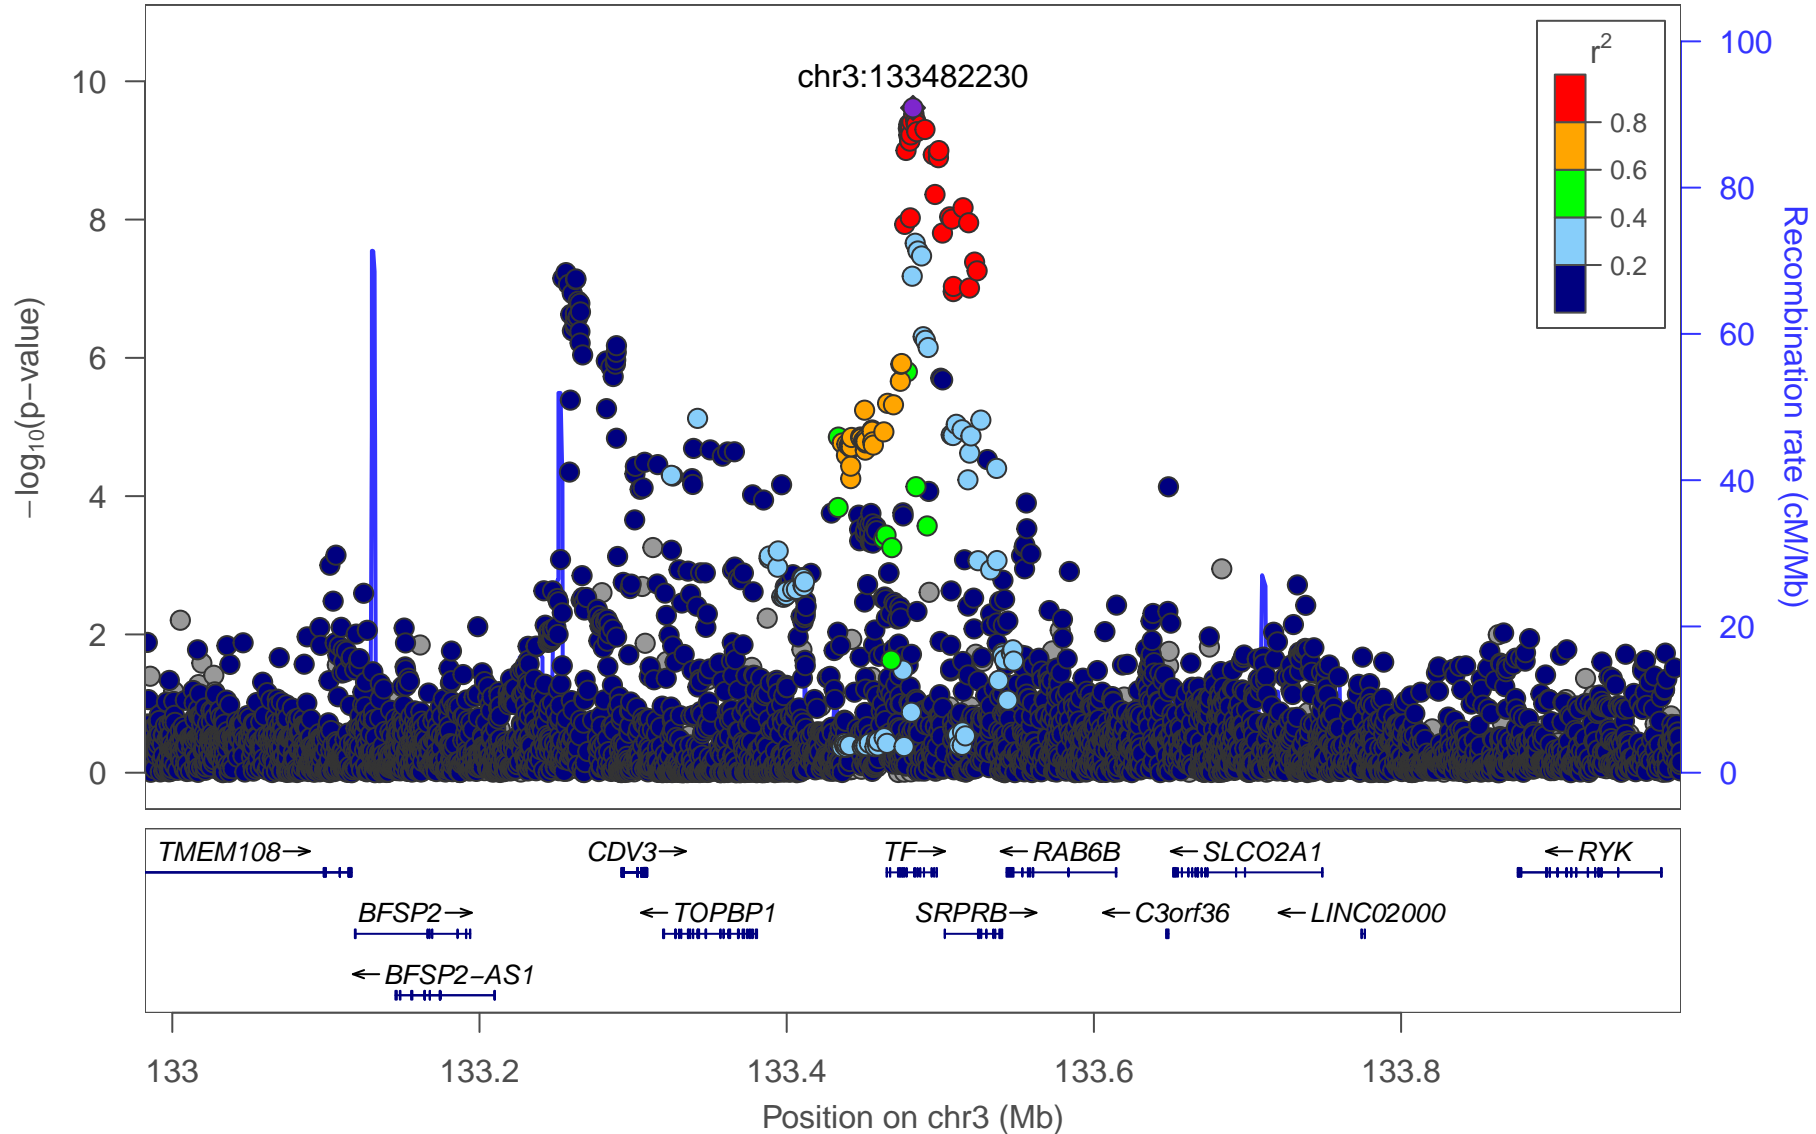

# 3\_11:IDL-TG

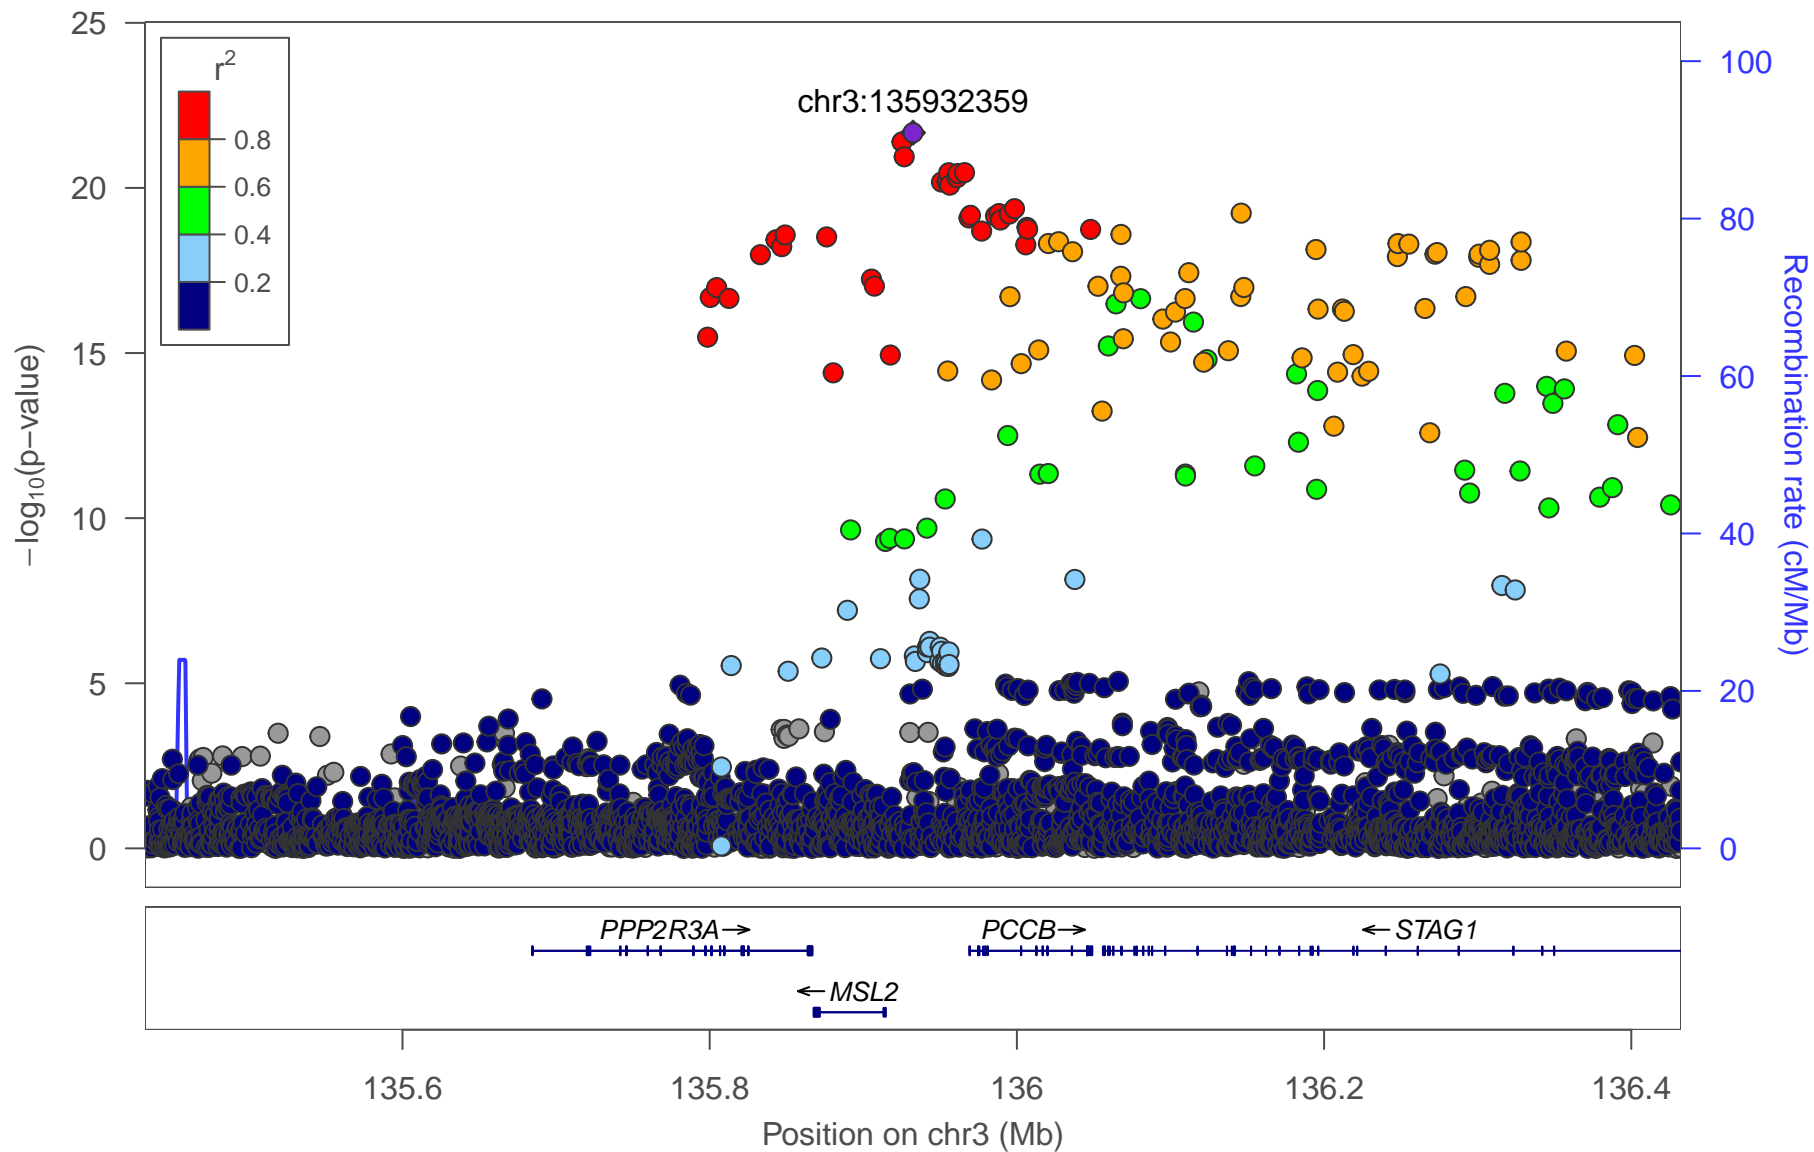



# 3\_13:Ala

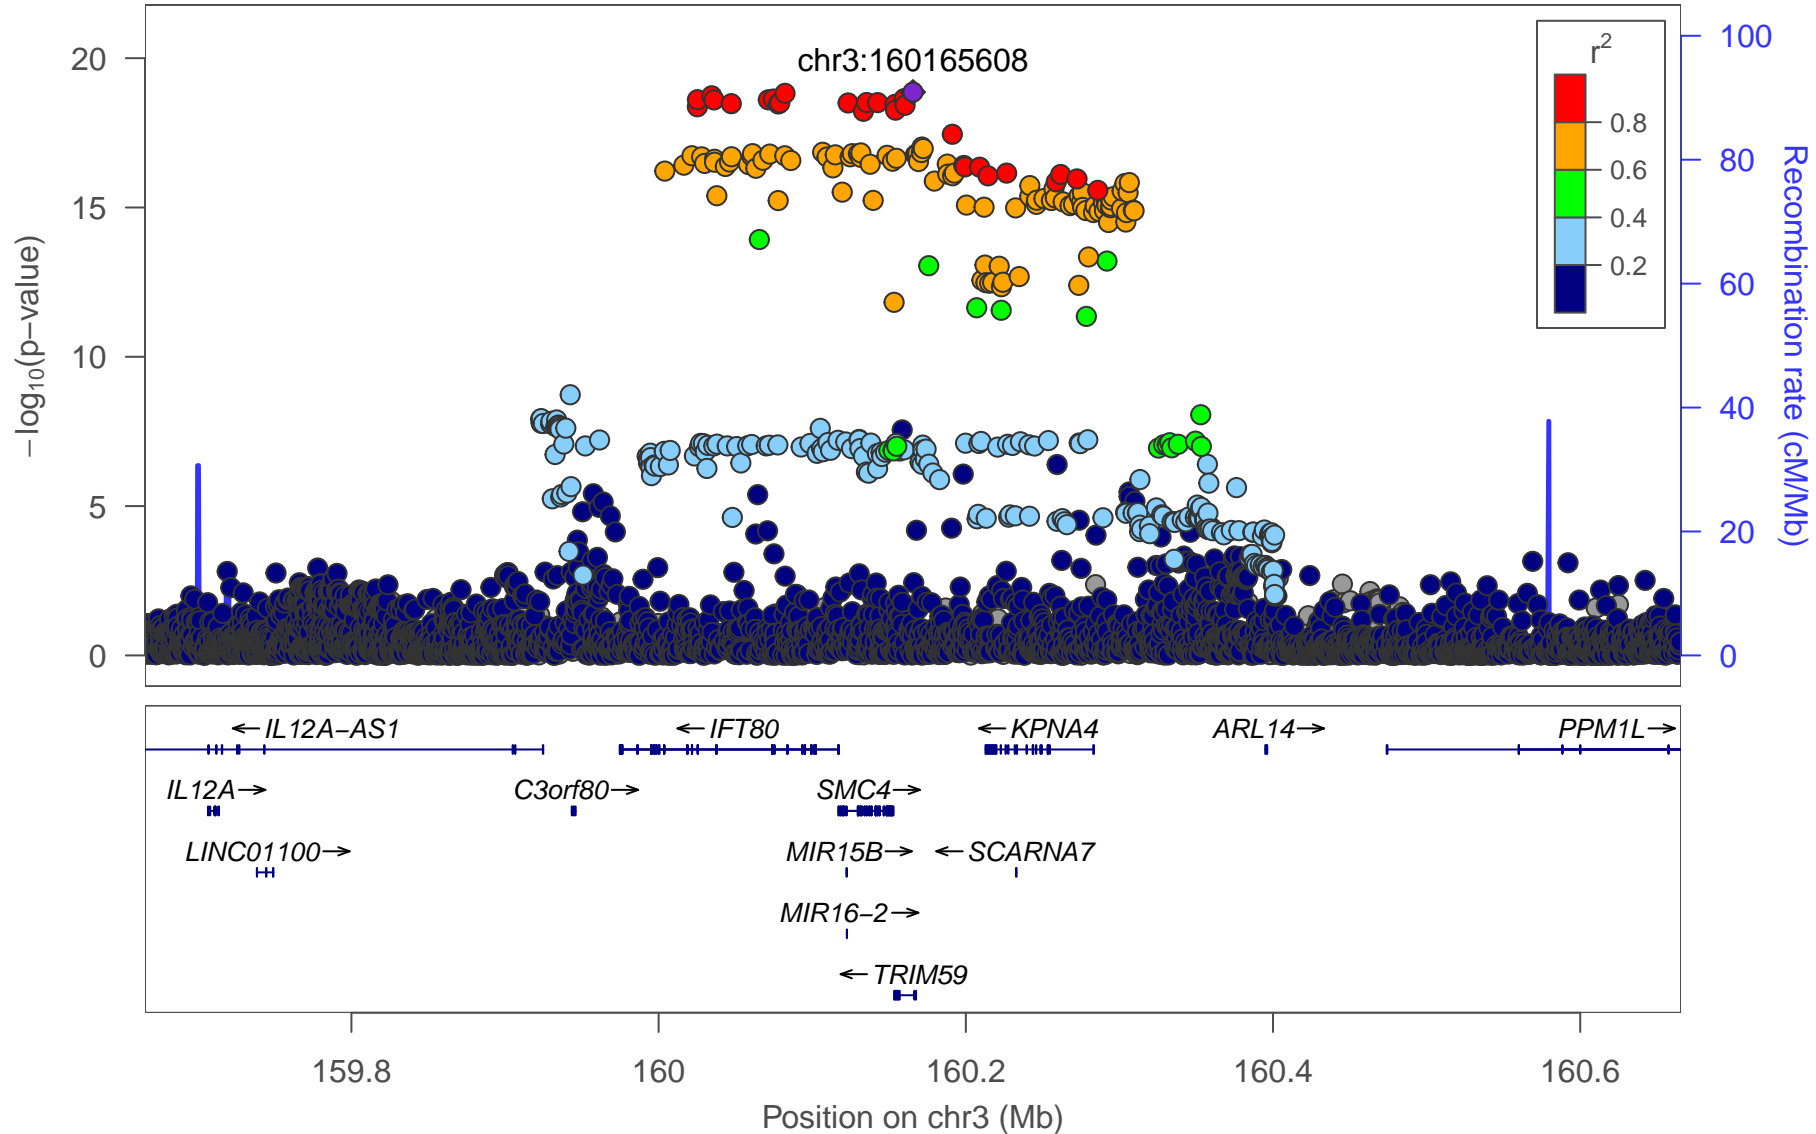



# 3\_14:Glc

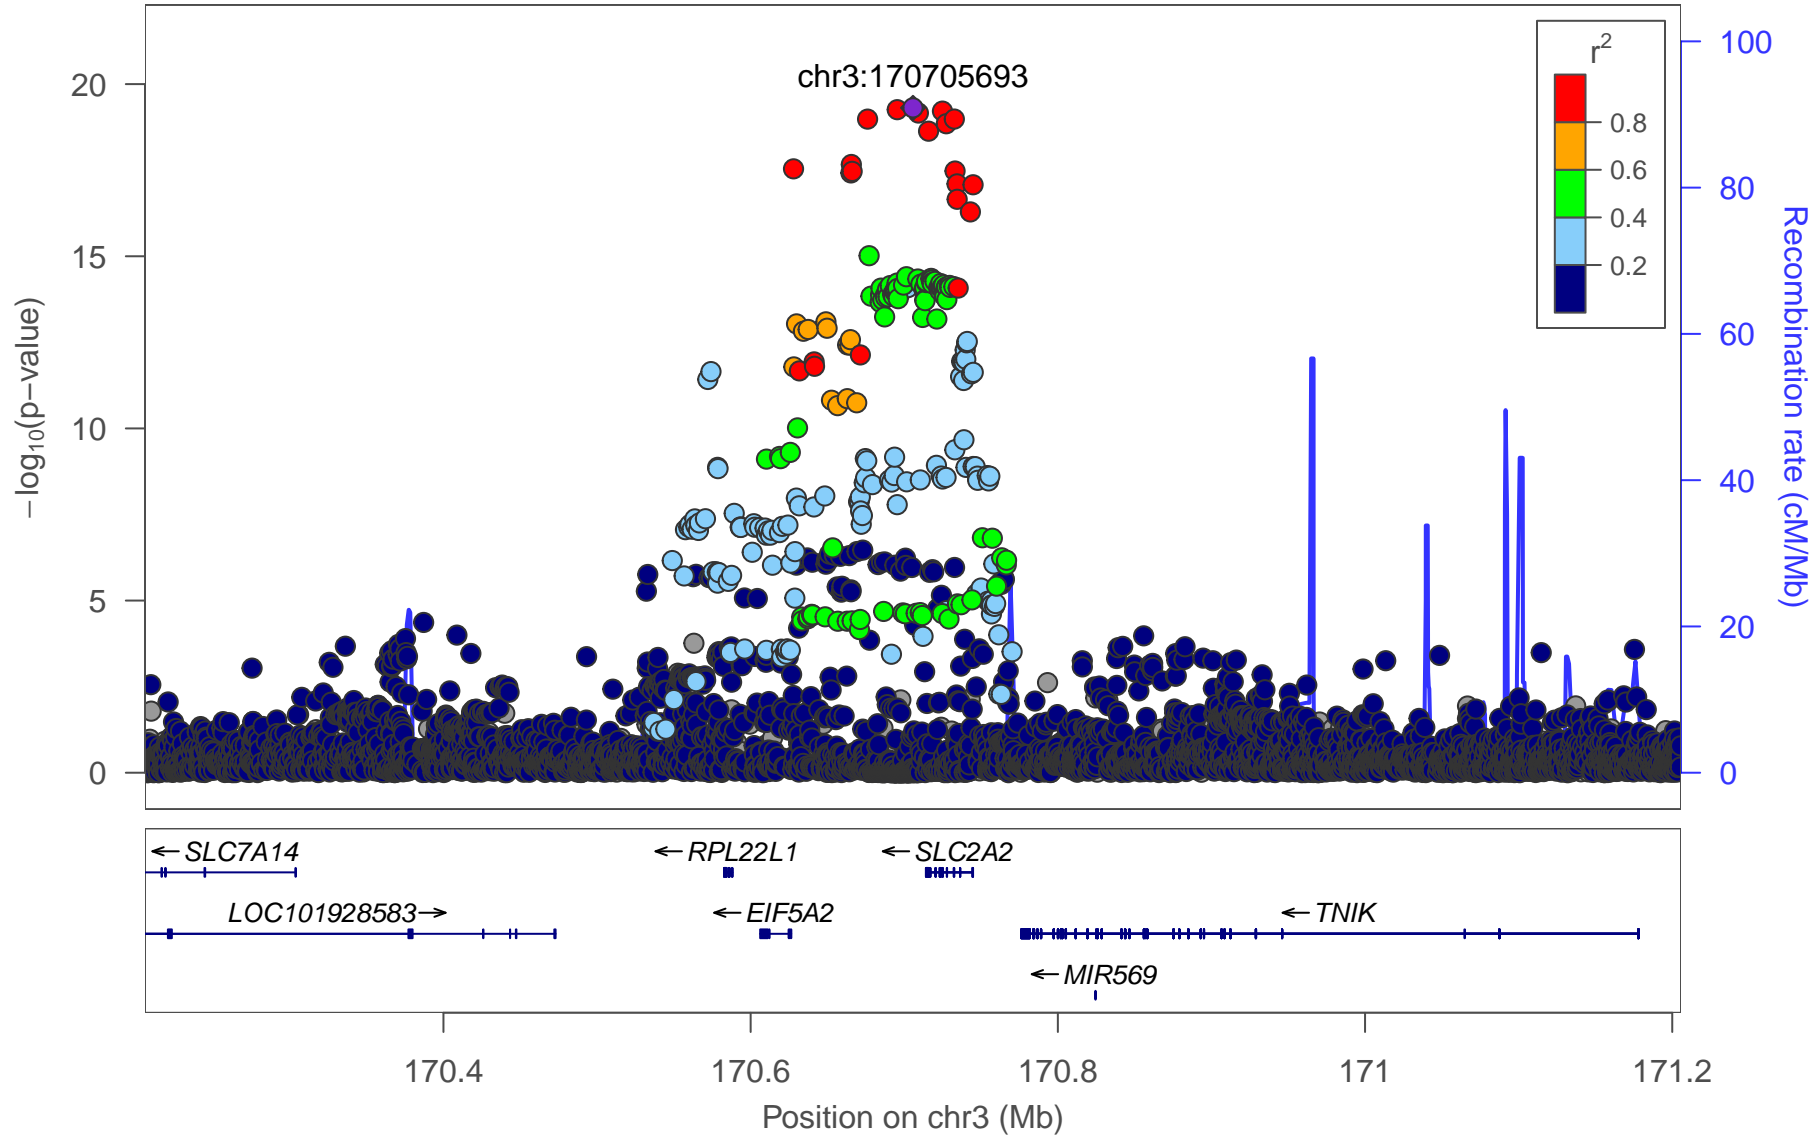

# 3\_15:His

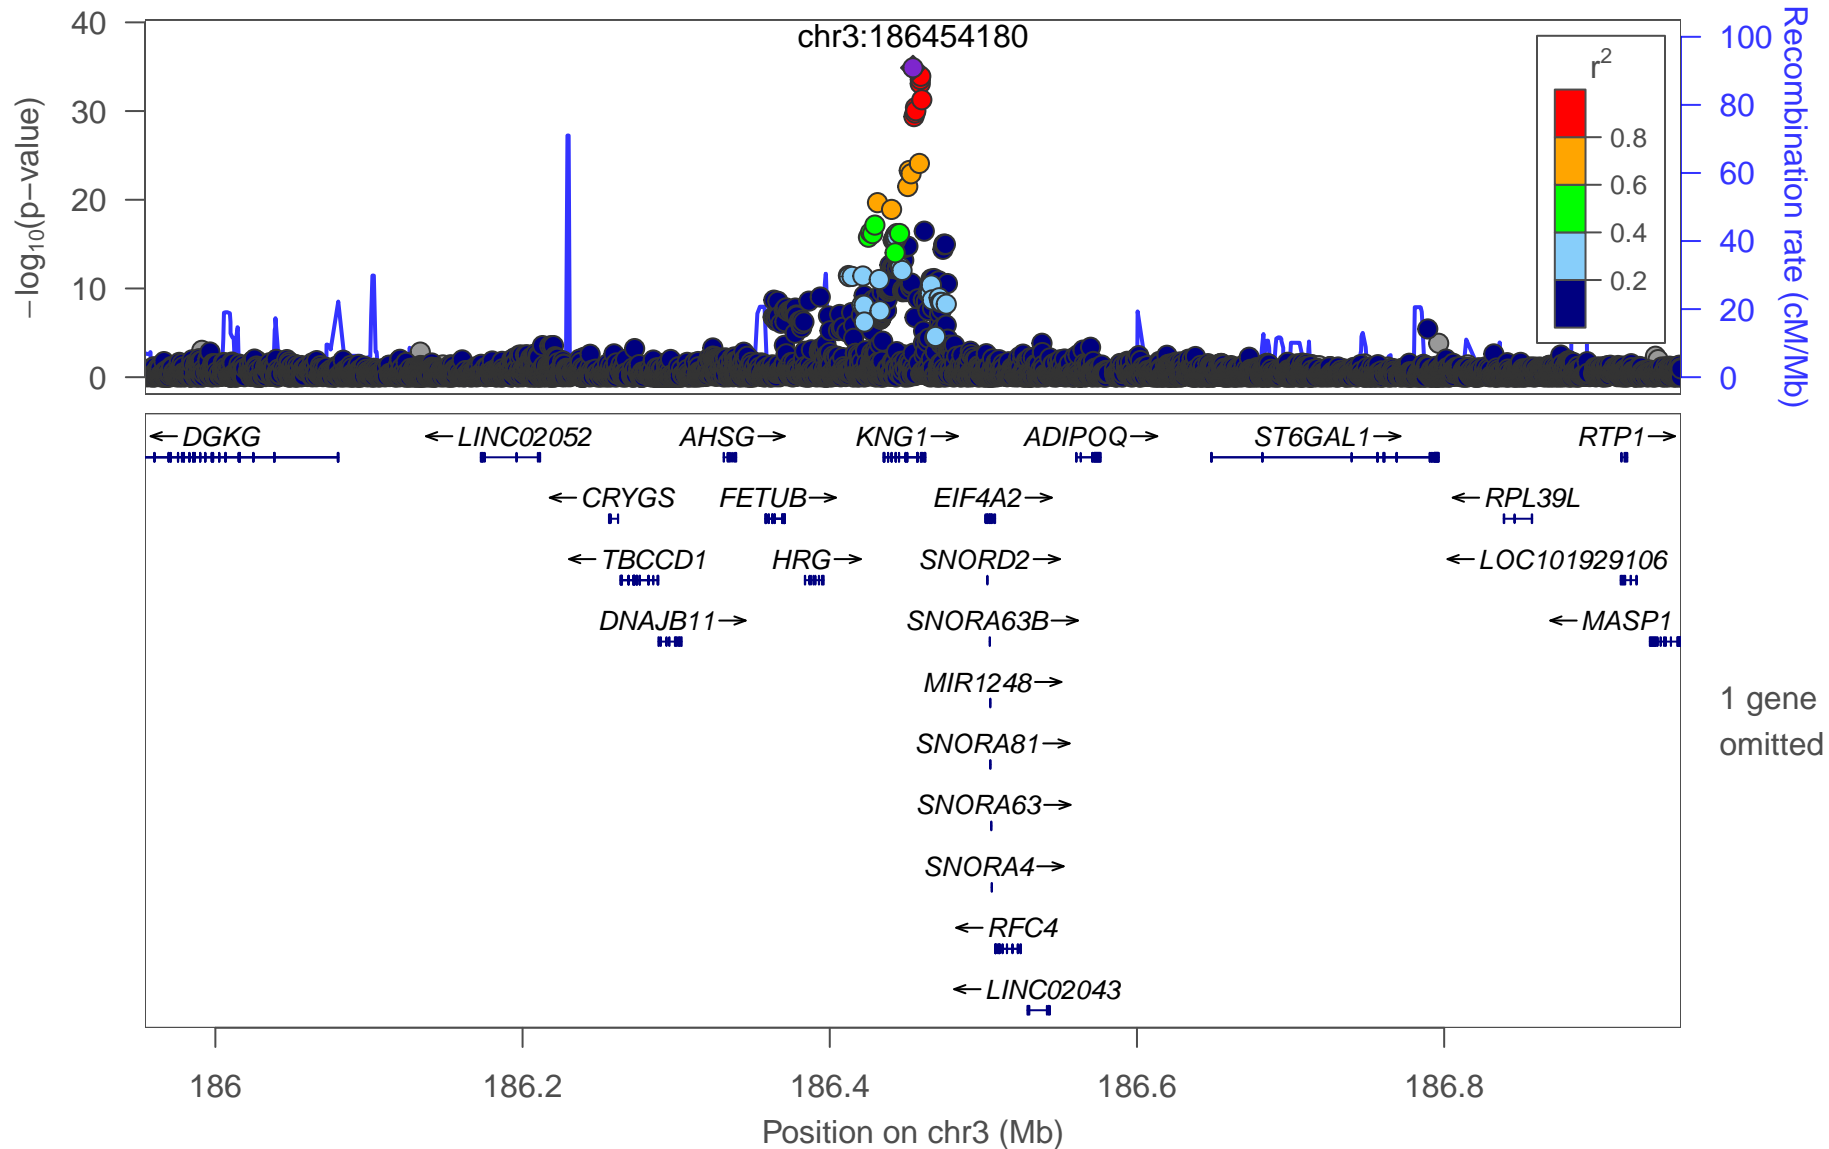

# 4\_1:GlycA

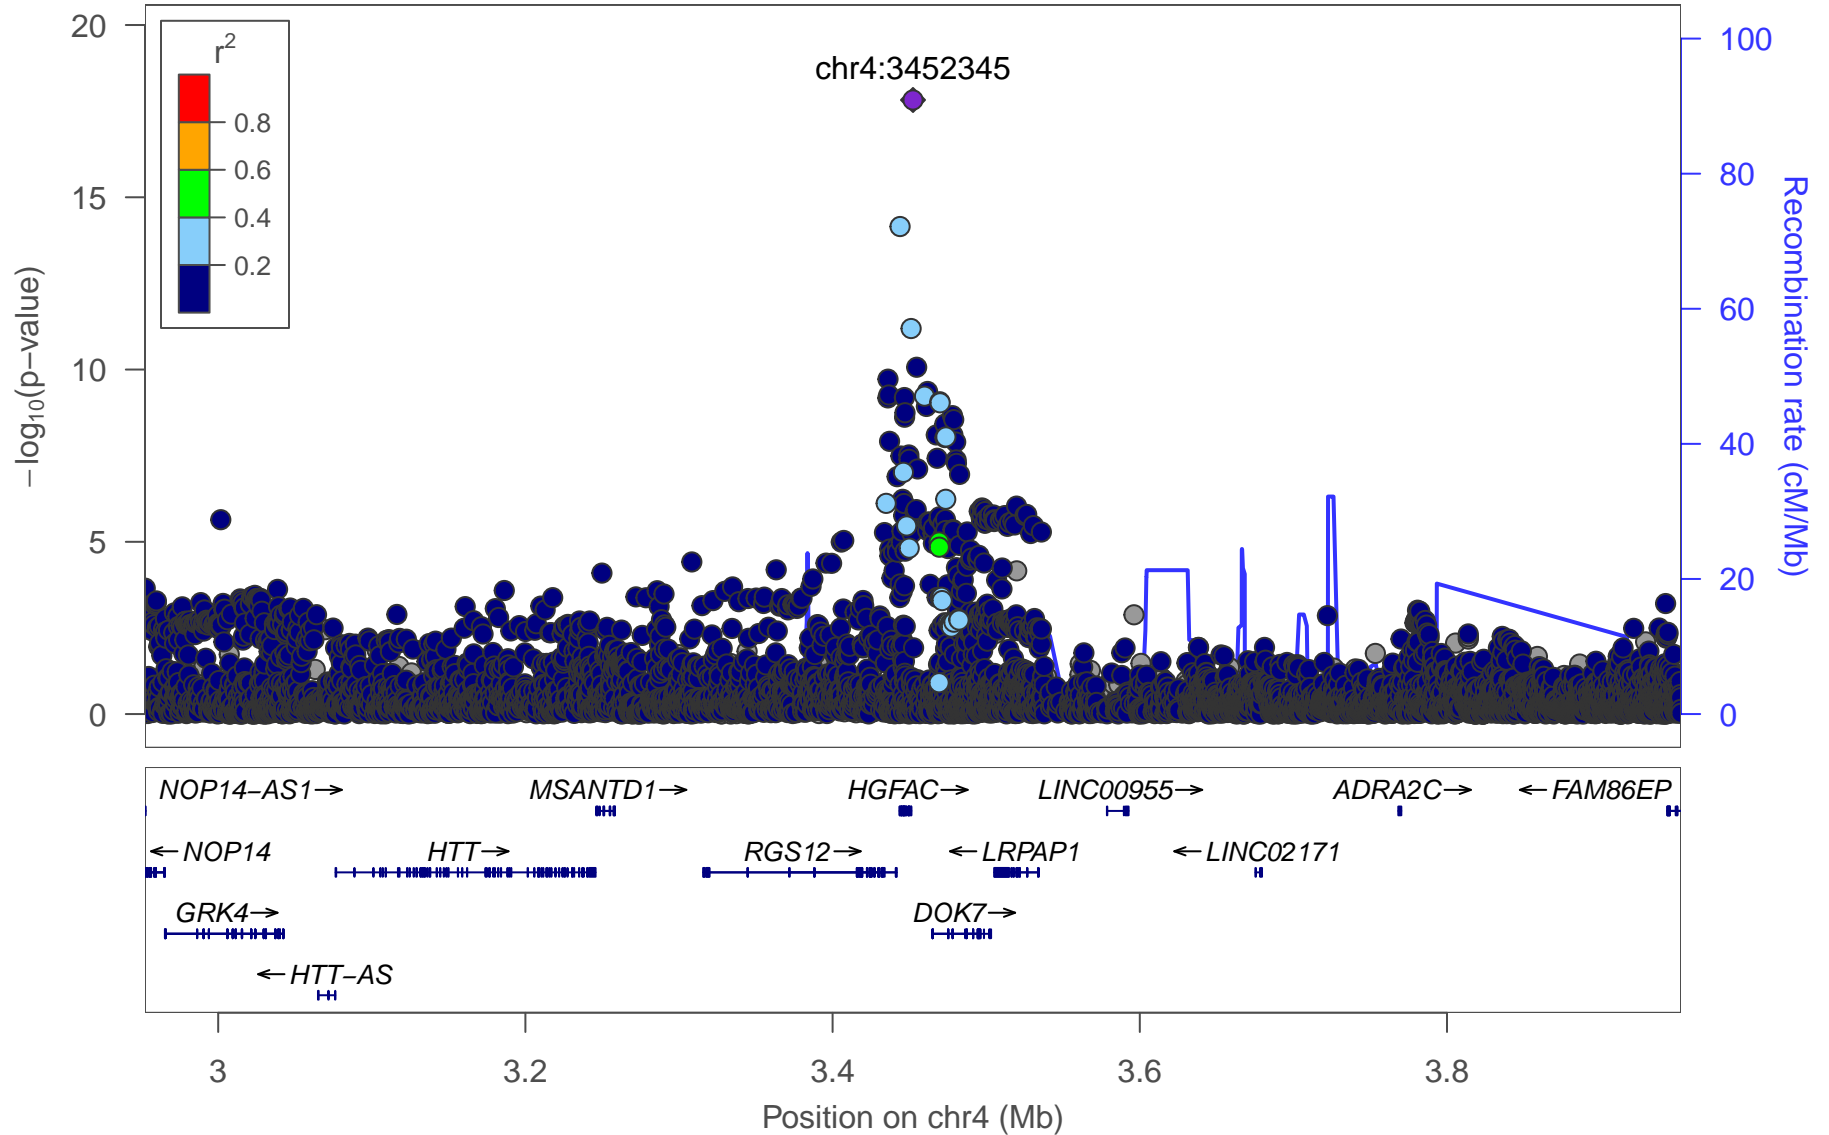

# 4\_2:Alb

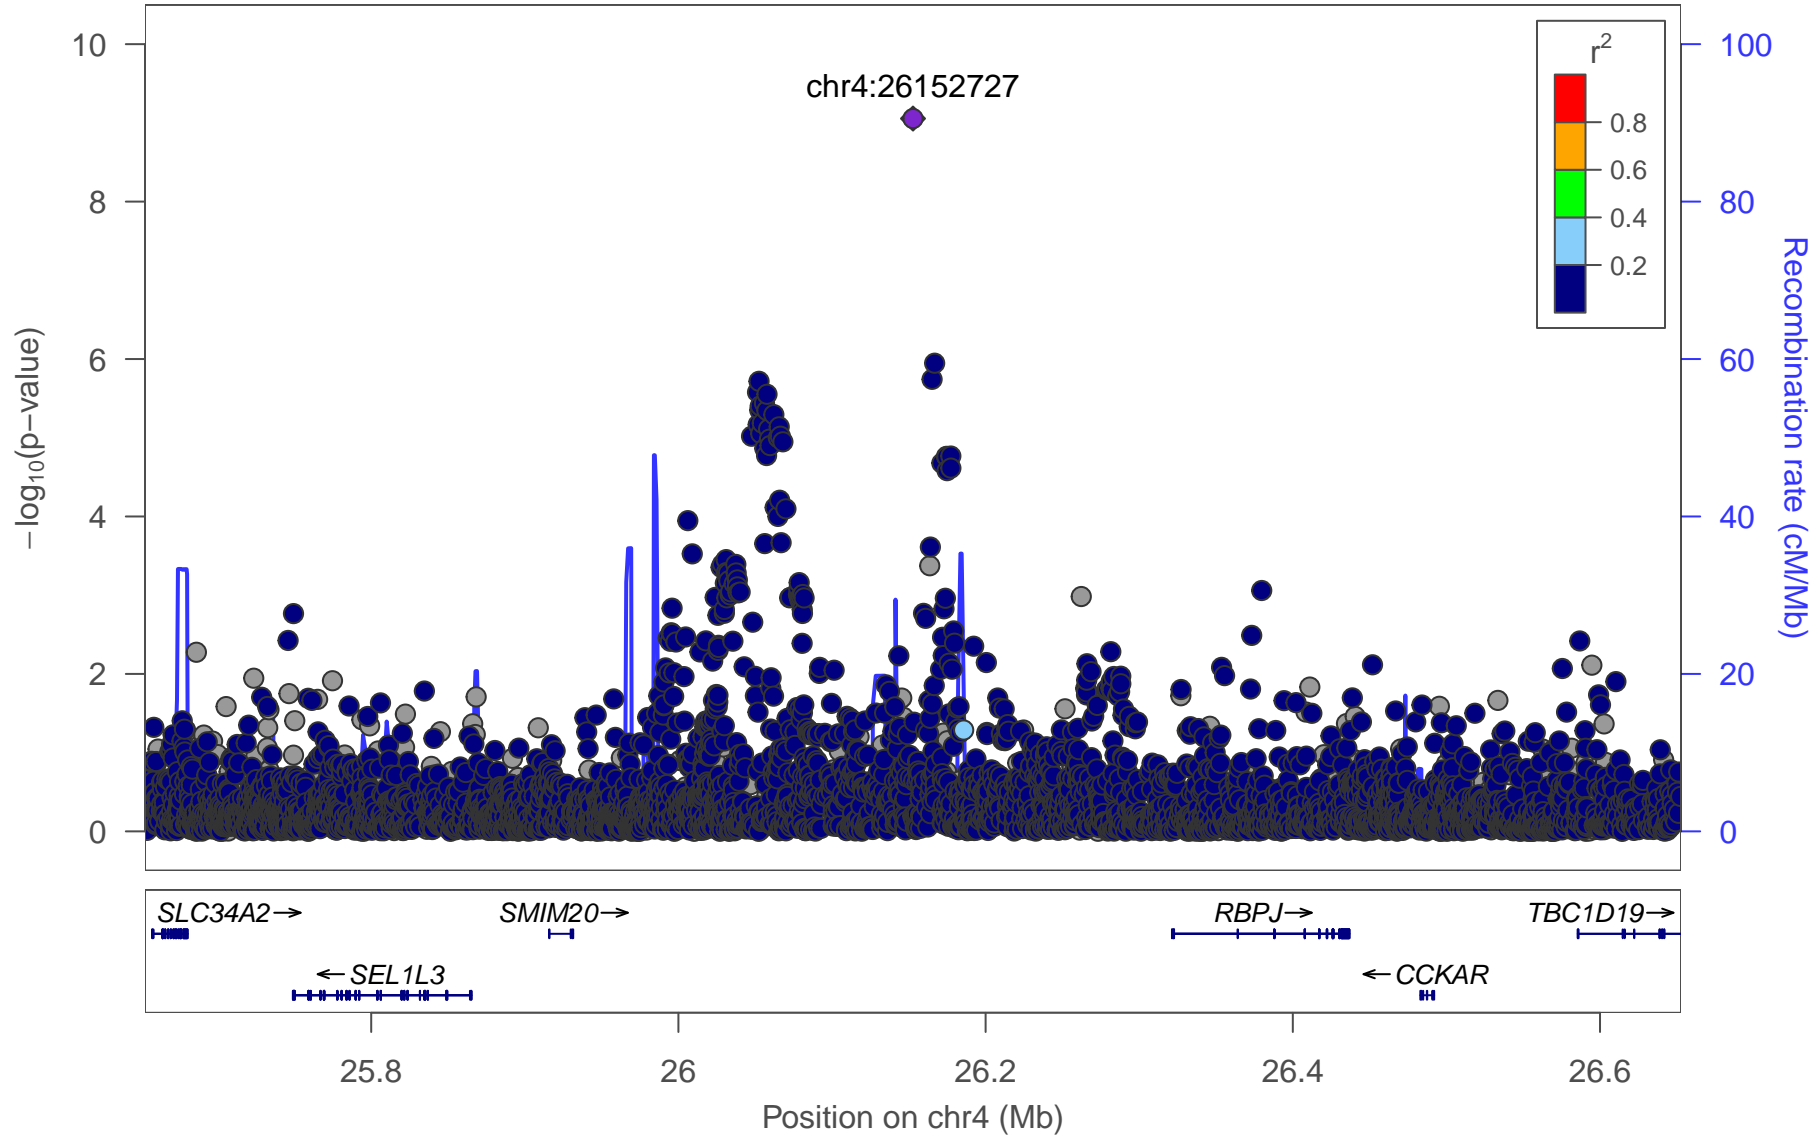

# 4\_3:PC

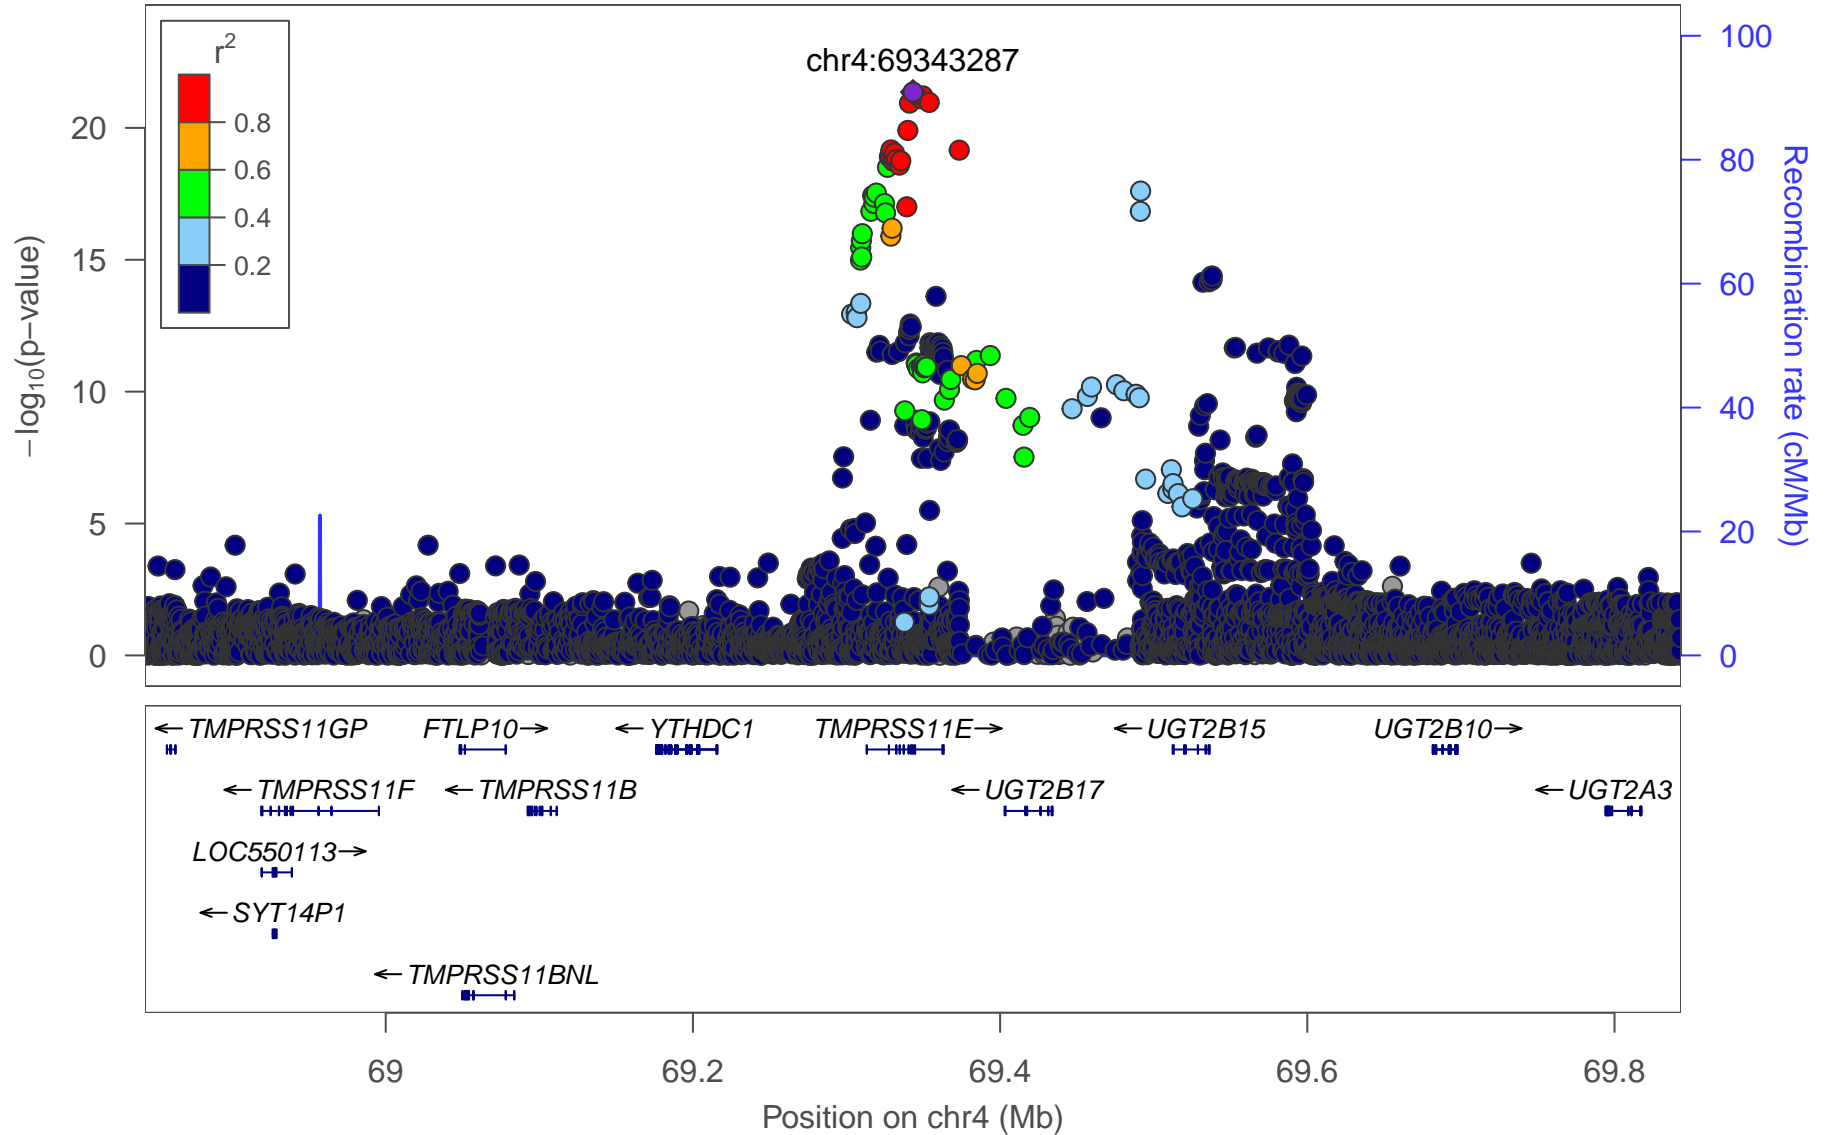

# 4\_4:Alb

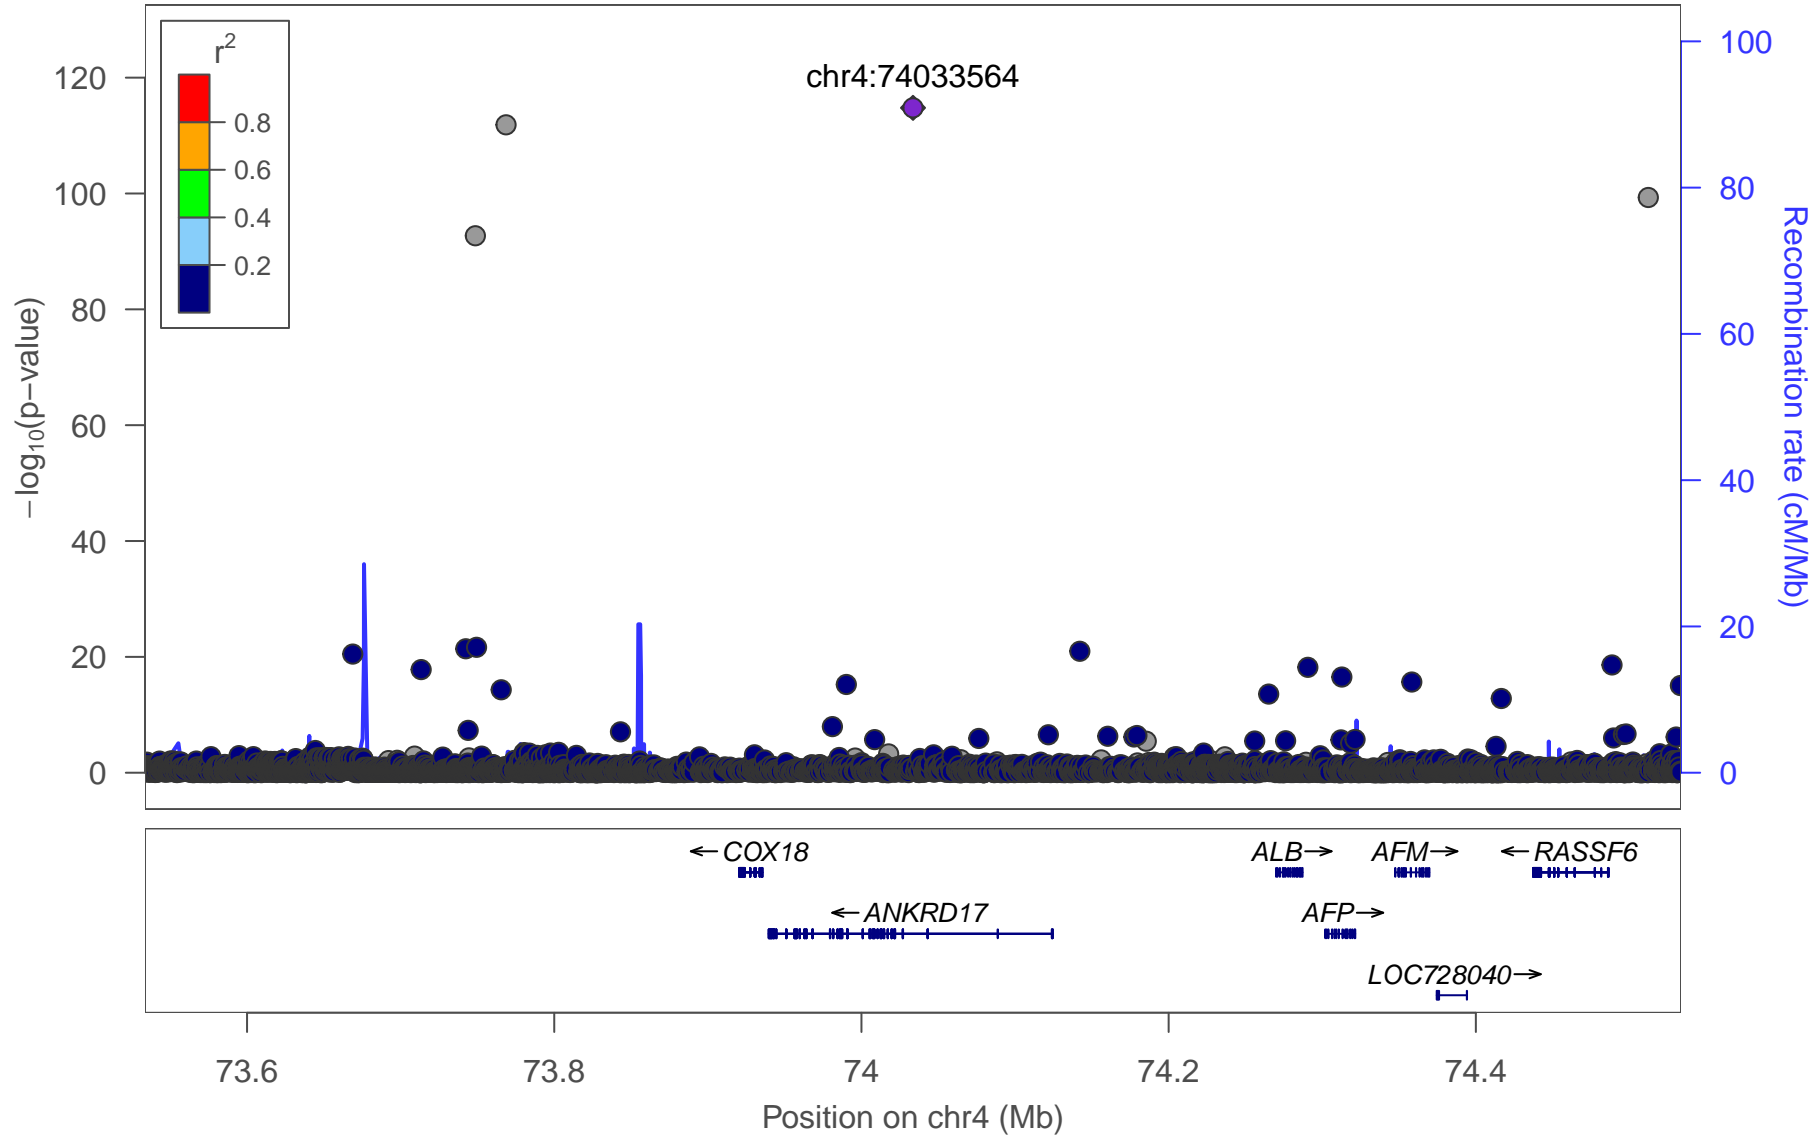

# 4\_5:Val

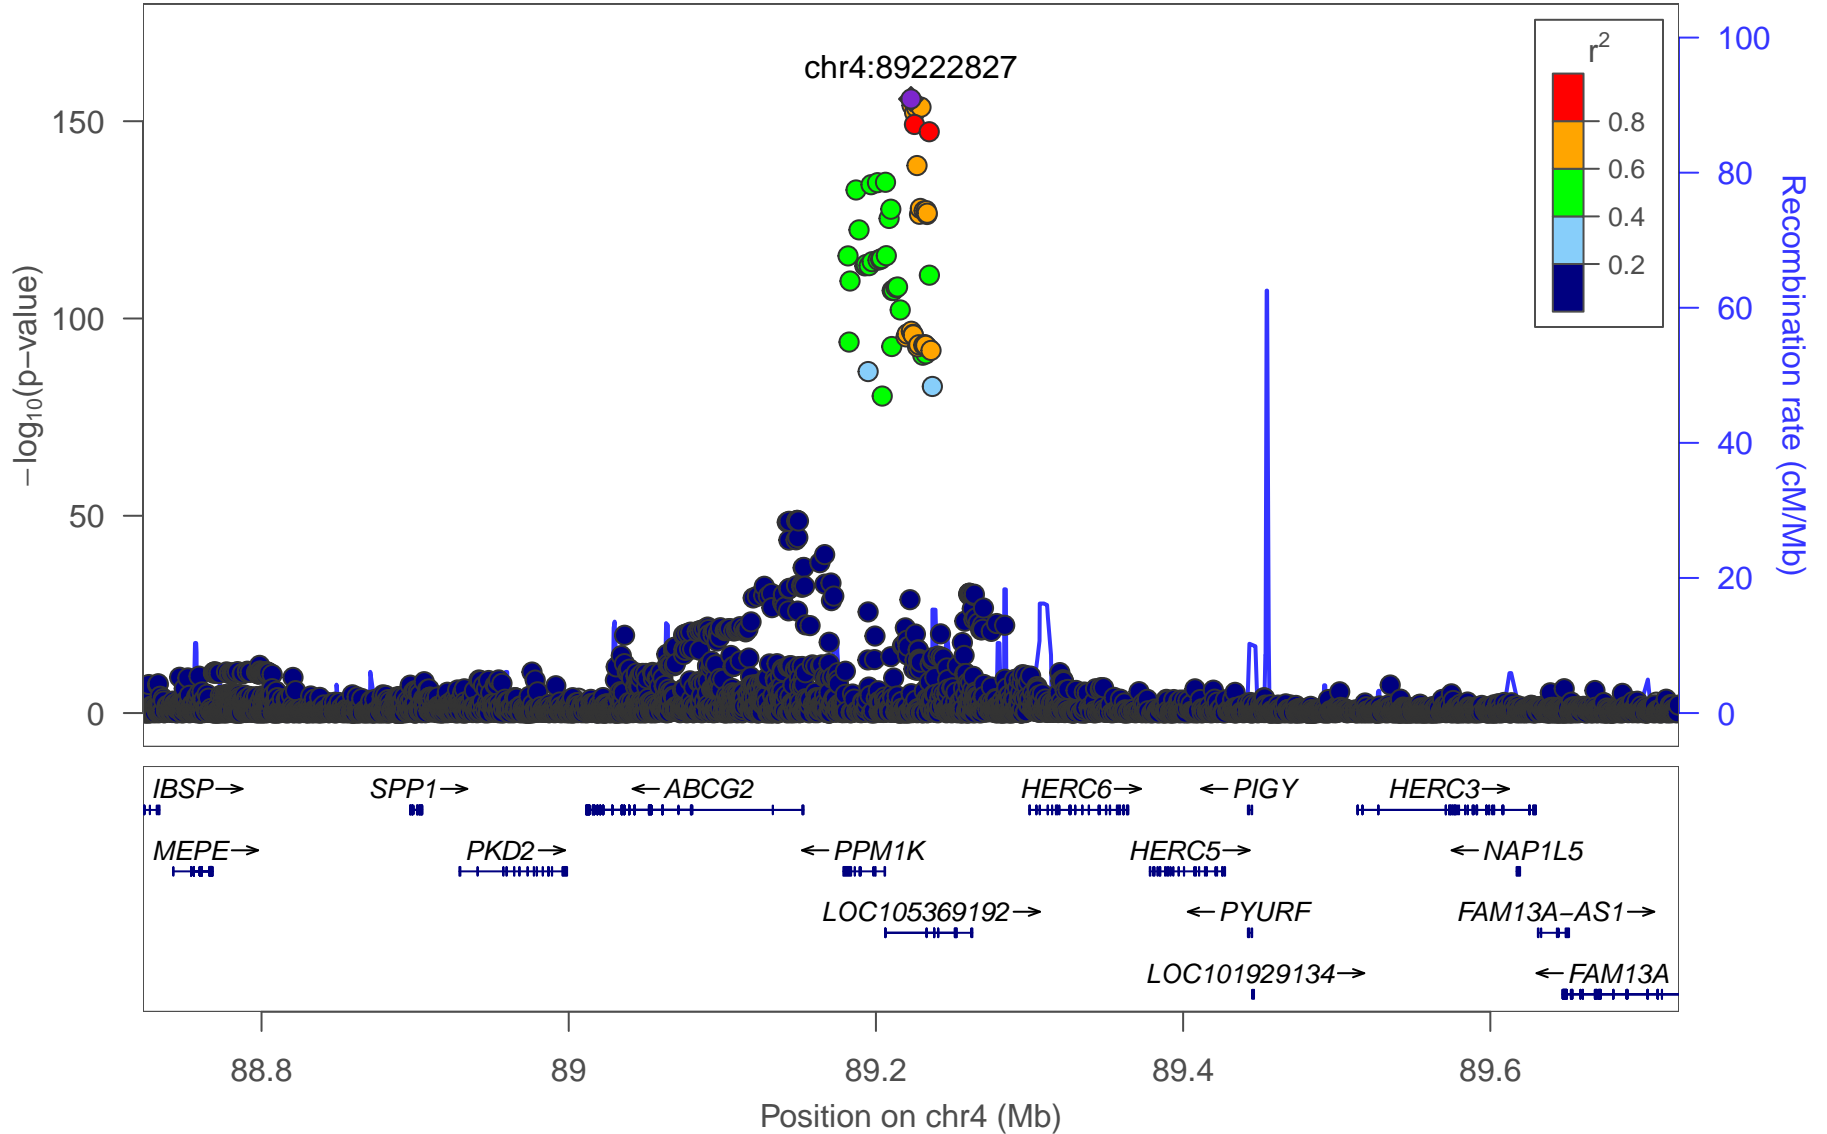

# 4\_6:Tyr

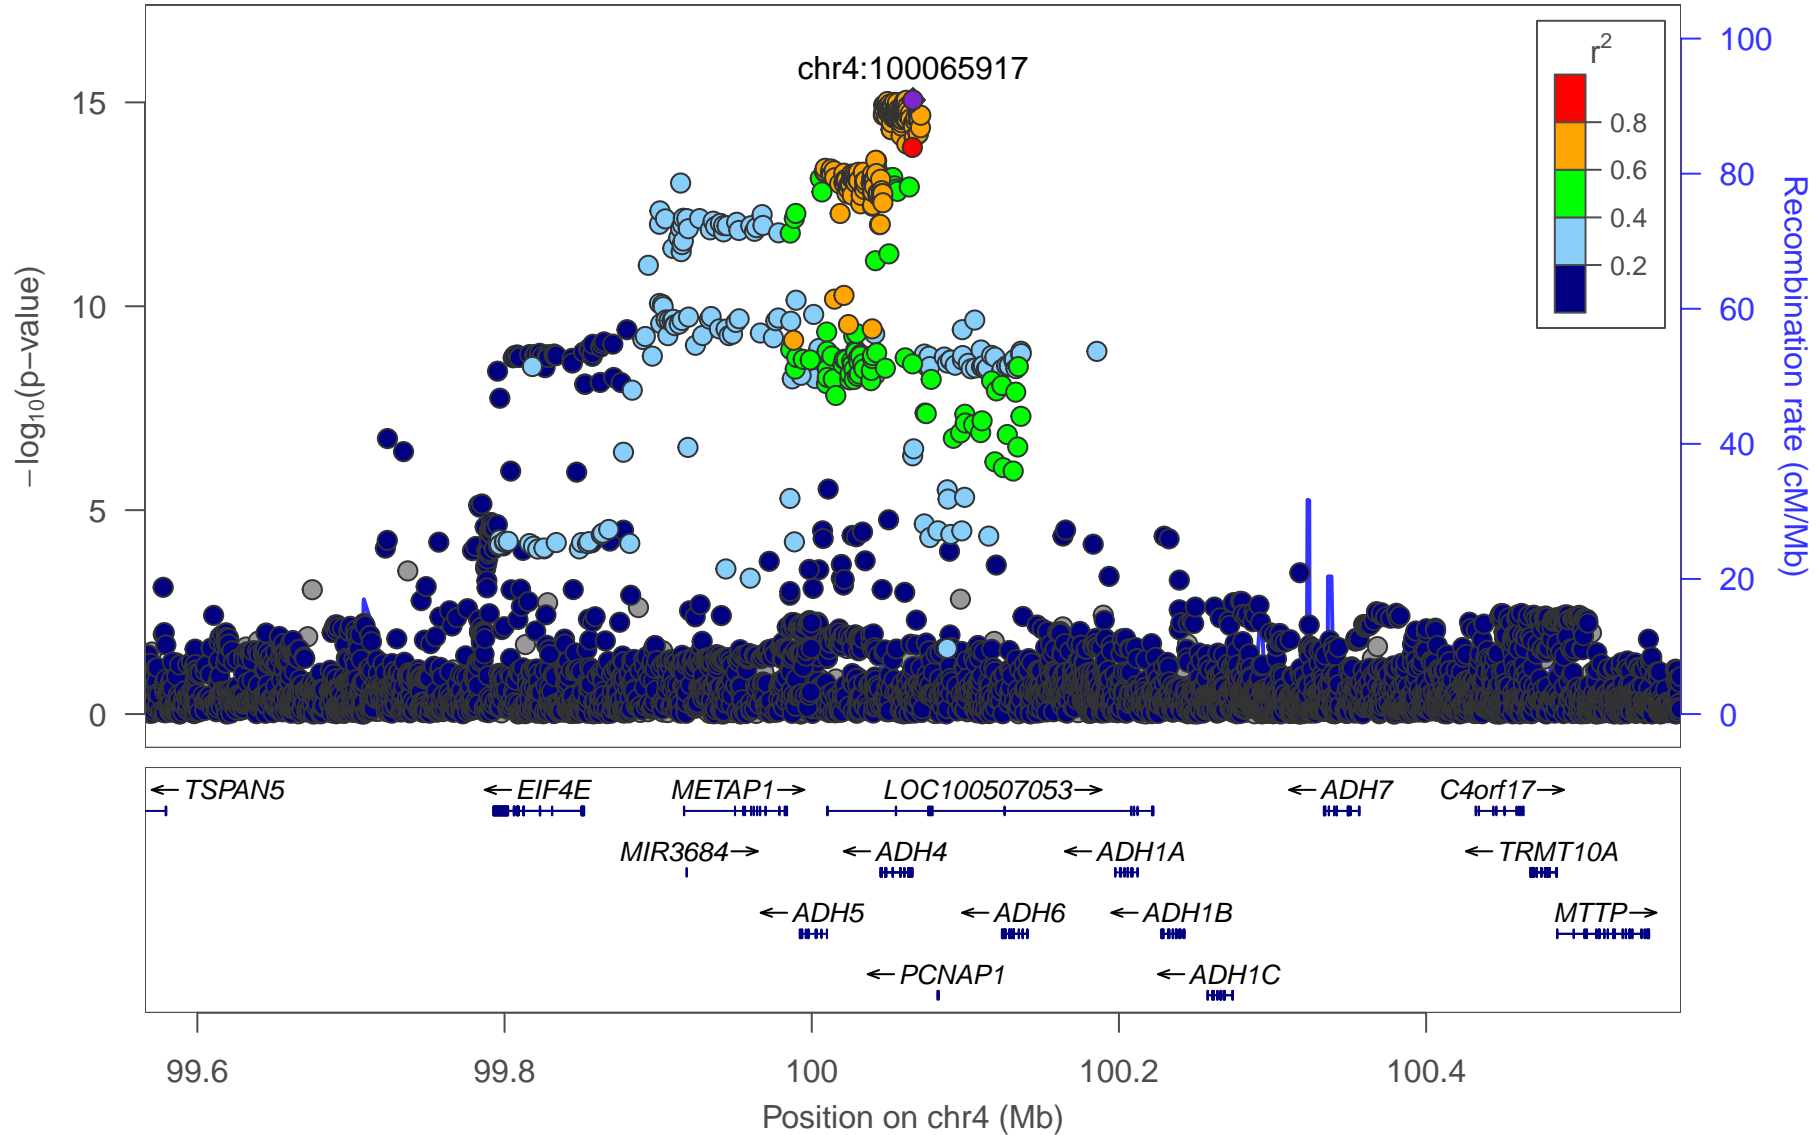



# 4\_7:XL-HDL-C

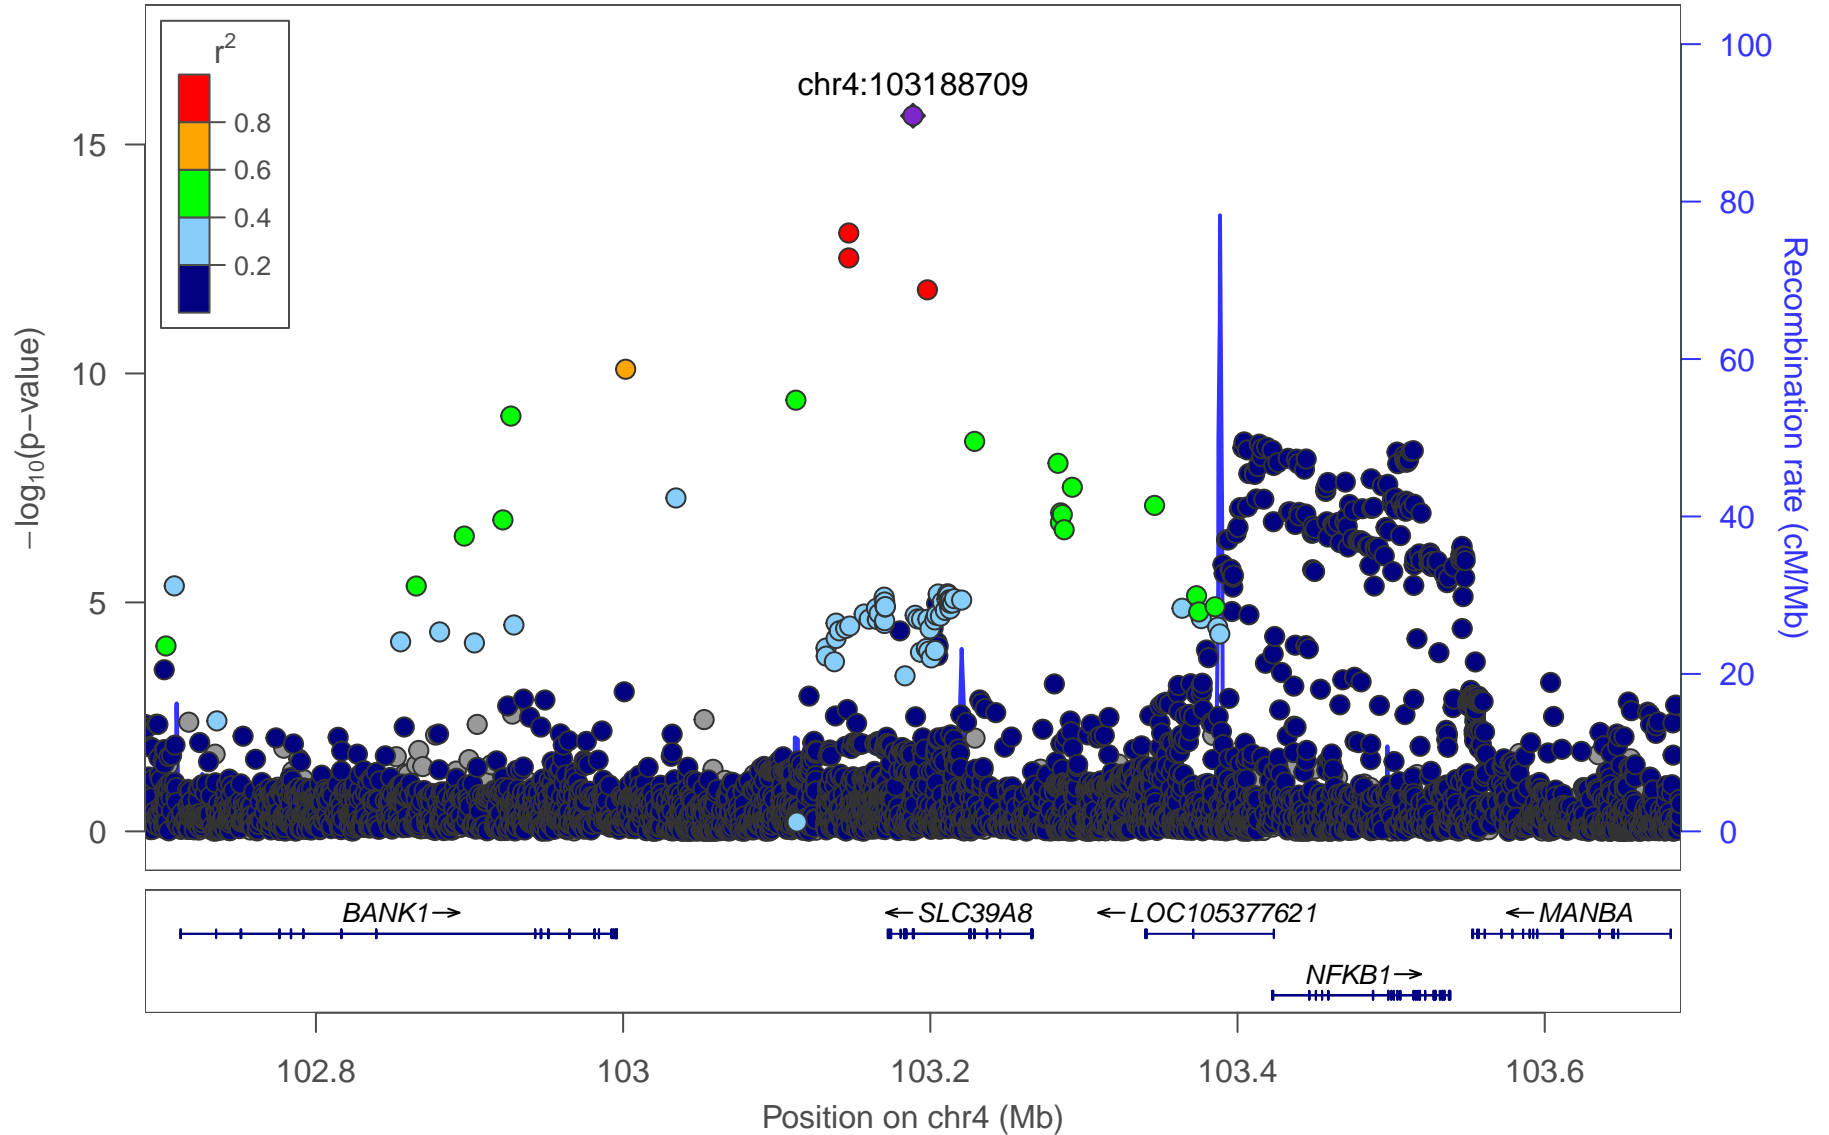

# 4\_8:M-HDL-TG\_percent

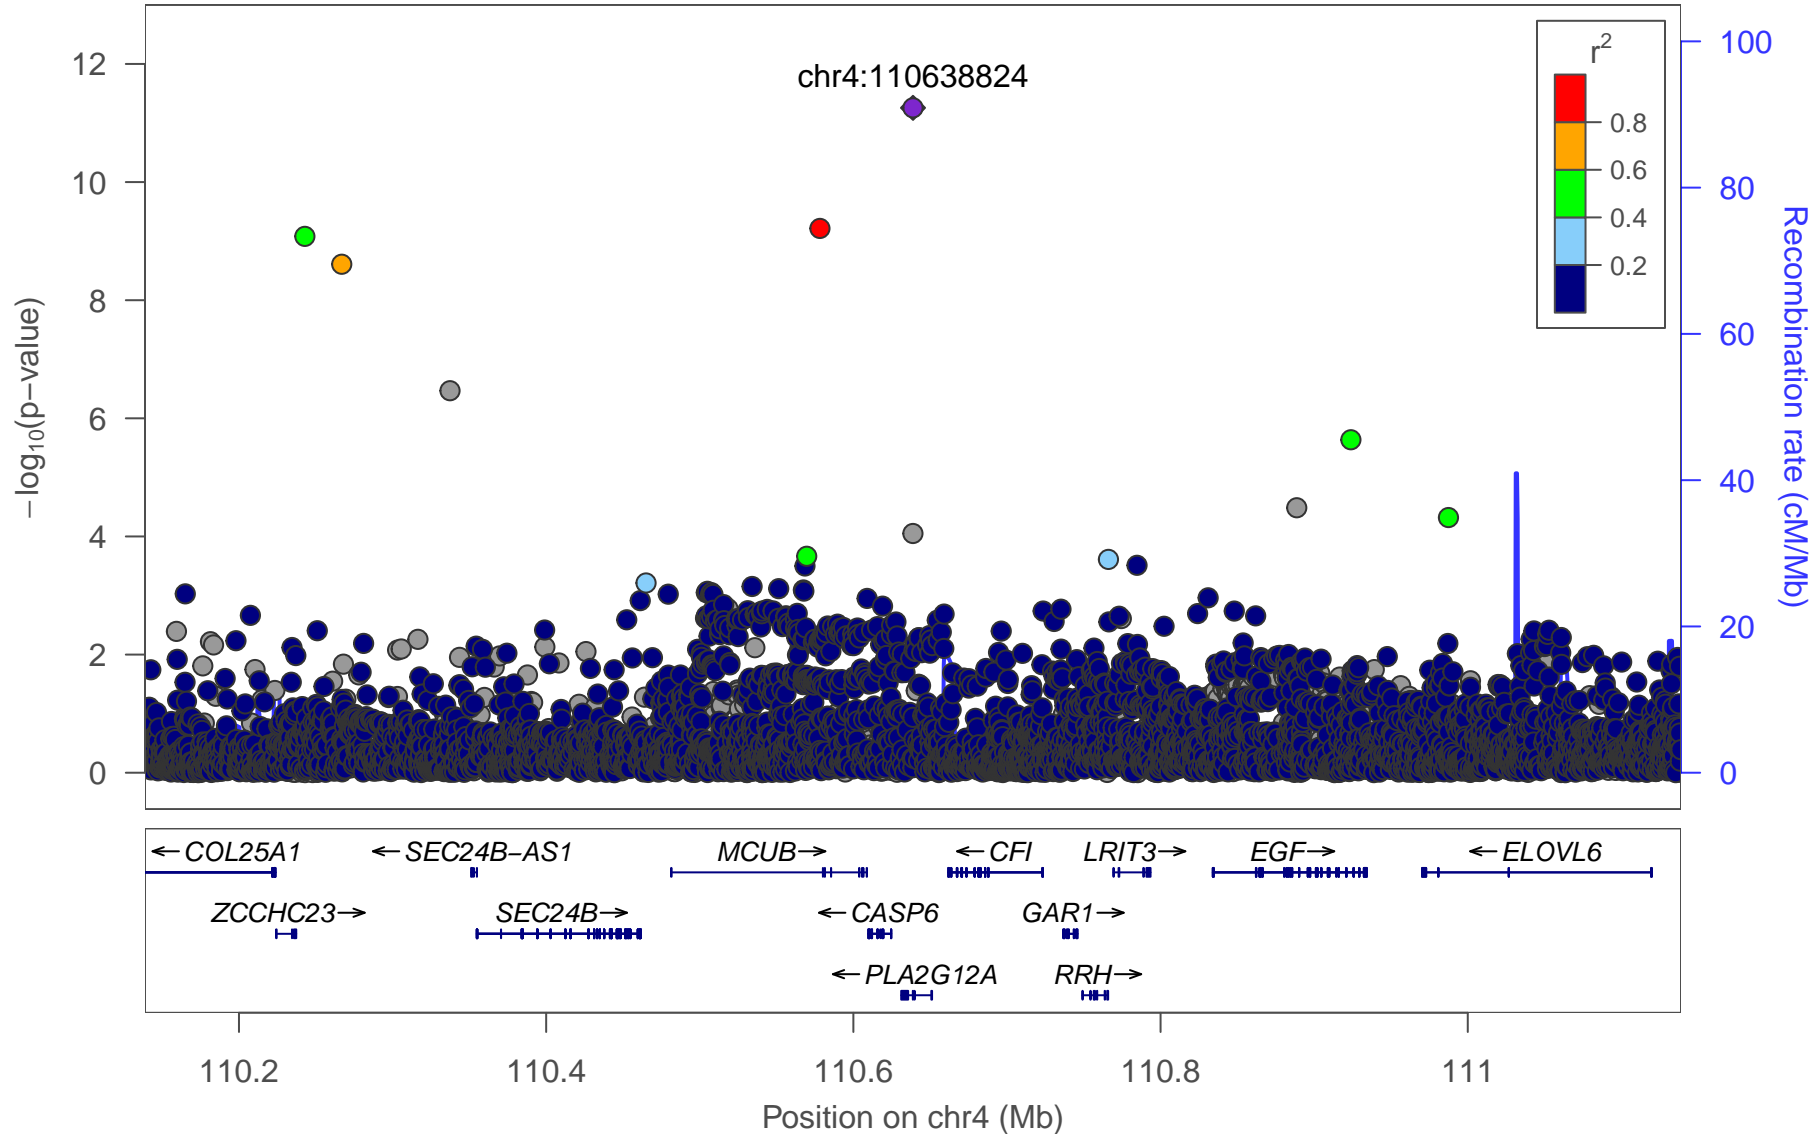

# 4\_9:Tyr

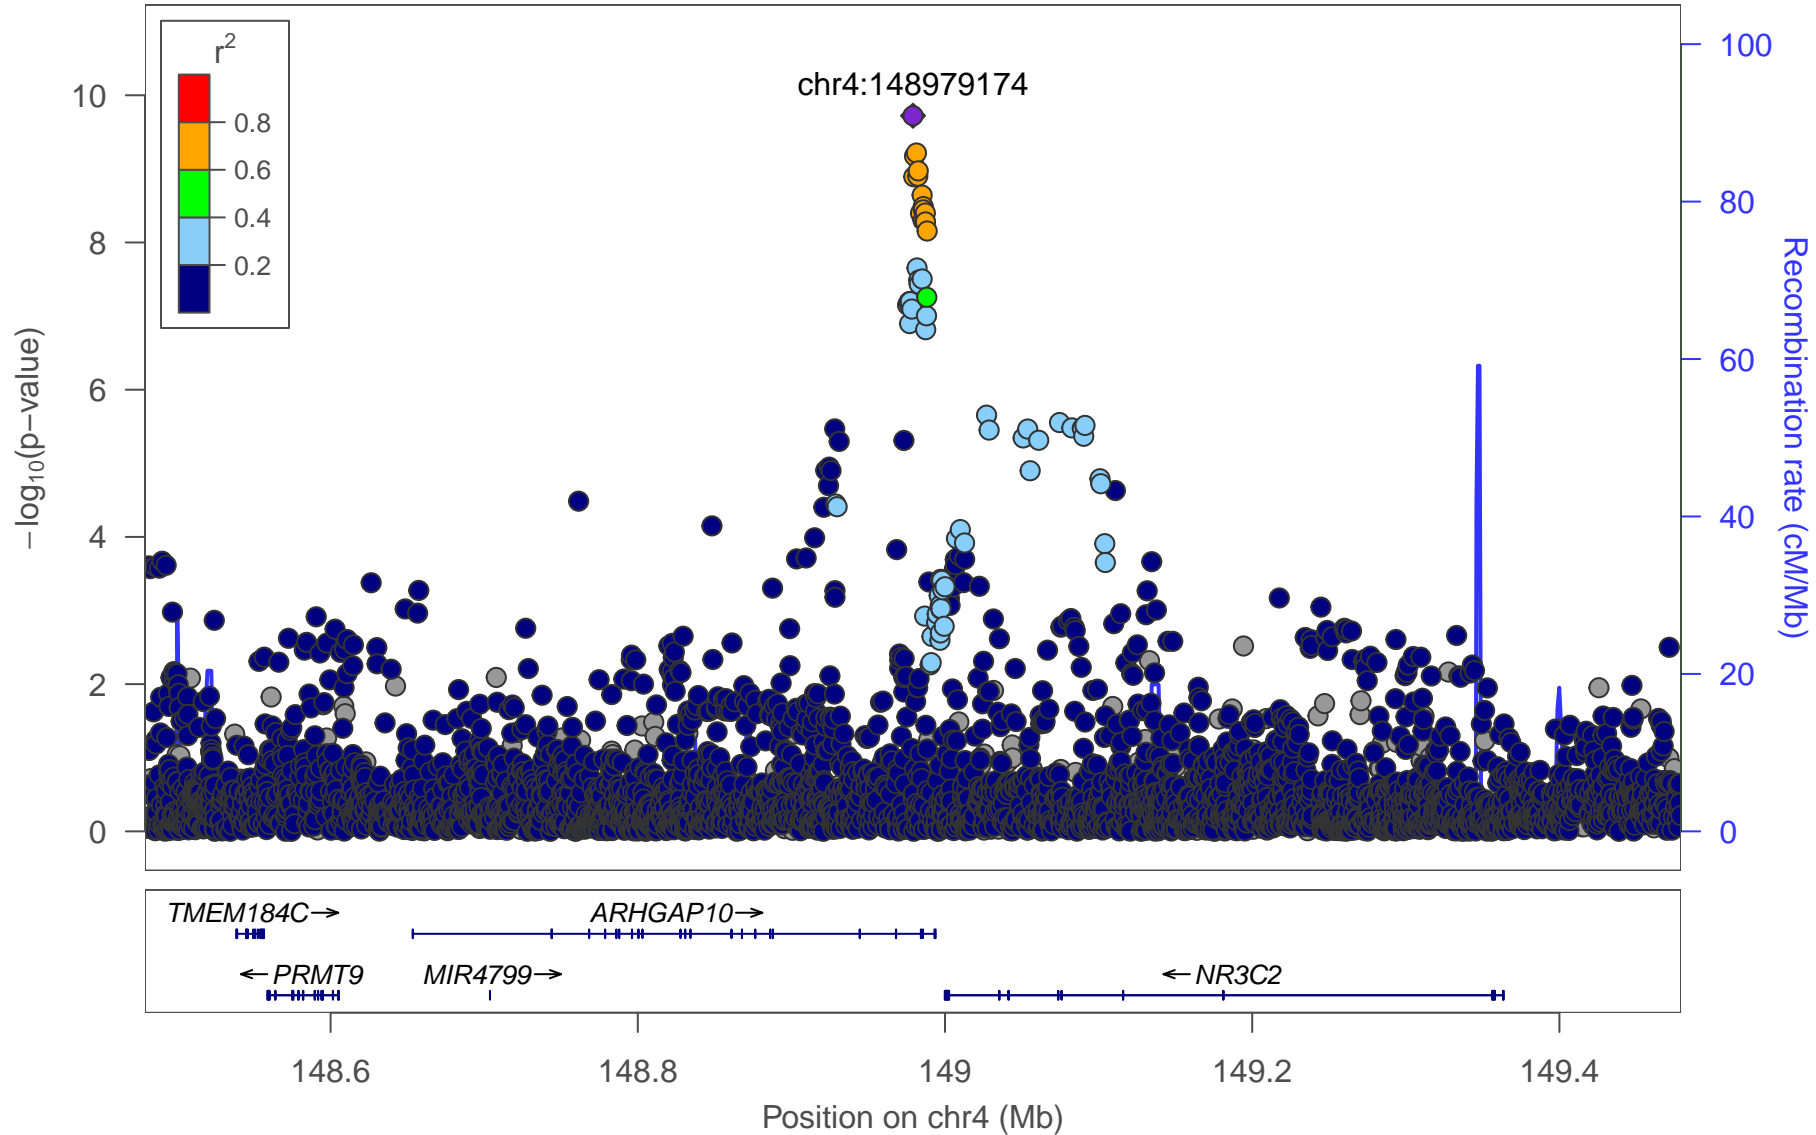

# 4\_10:Phe

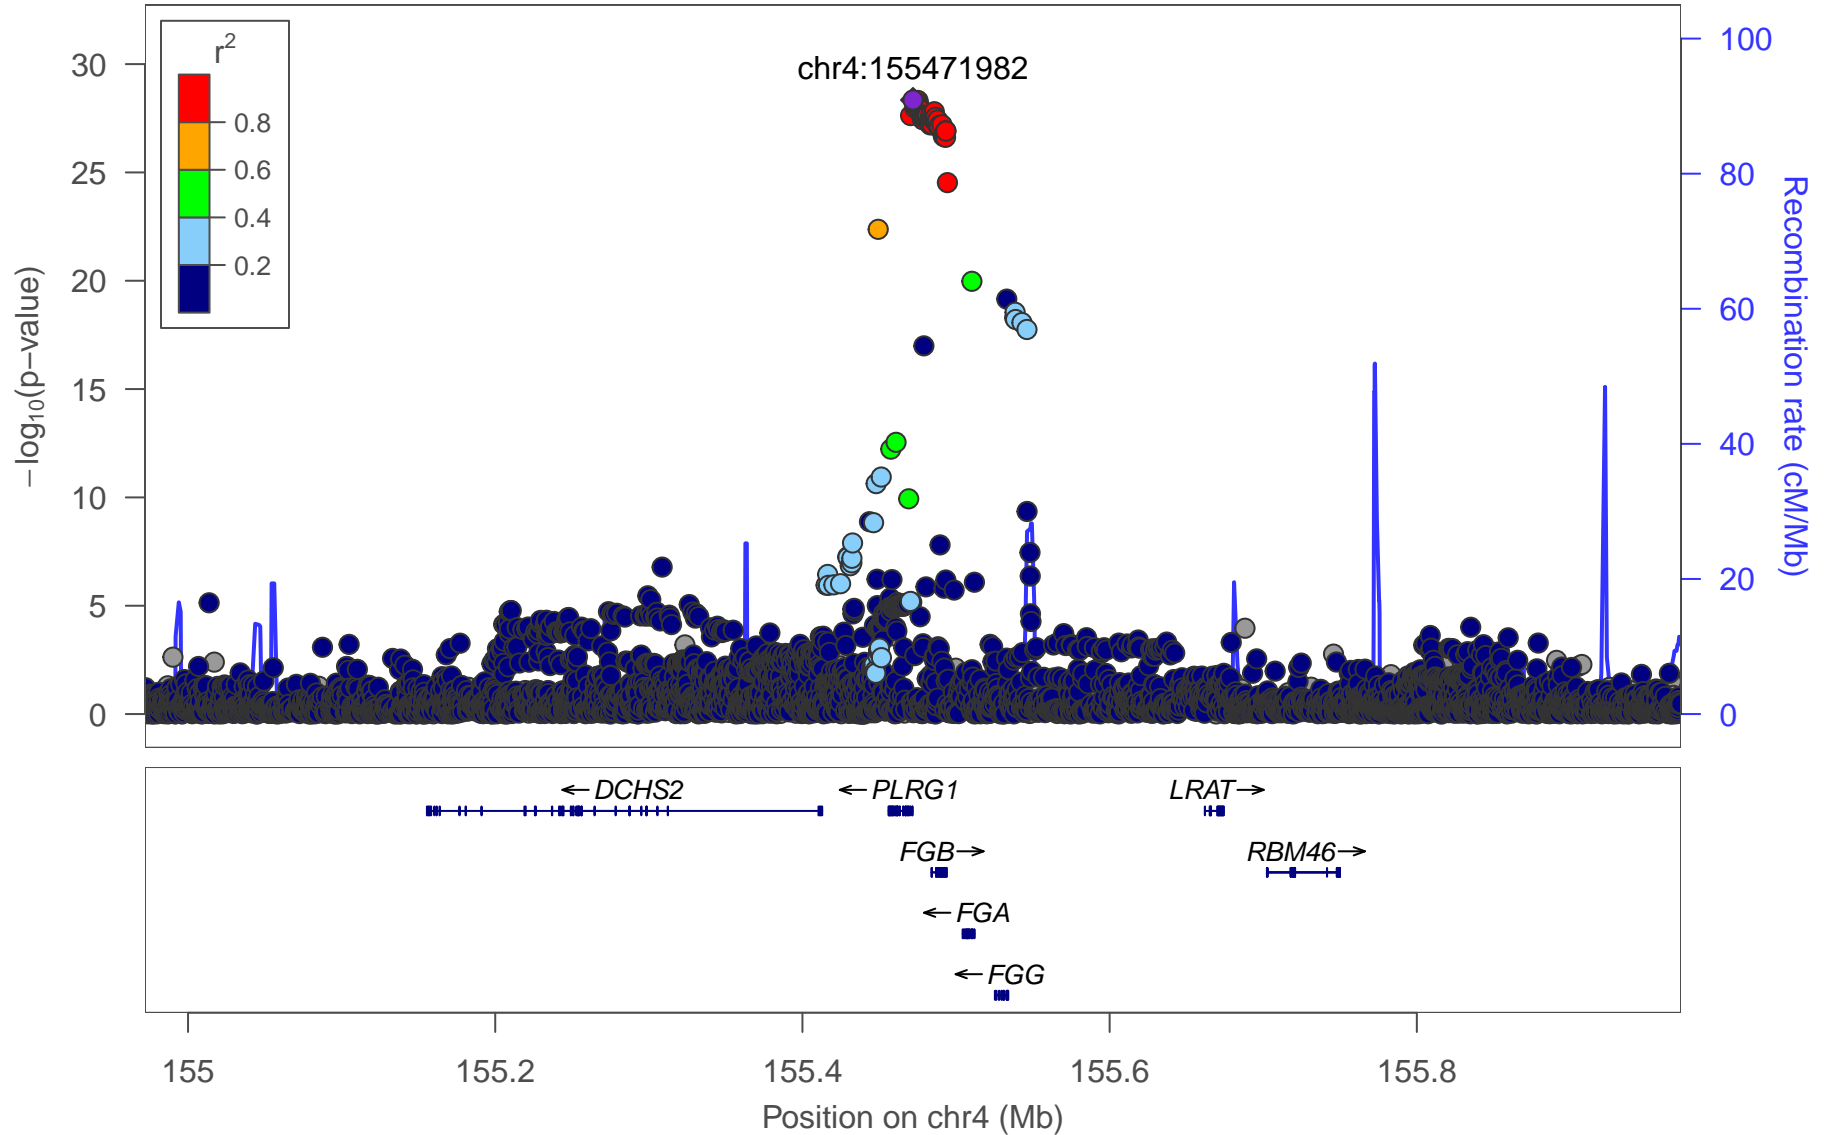

# 4\_11:Phe

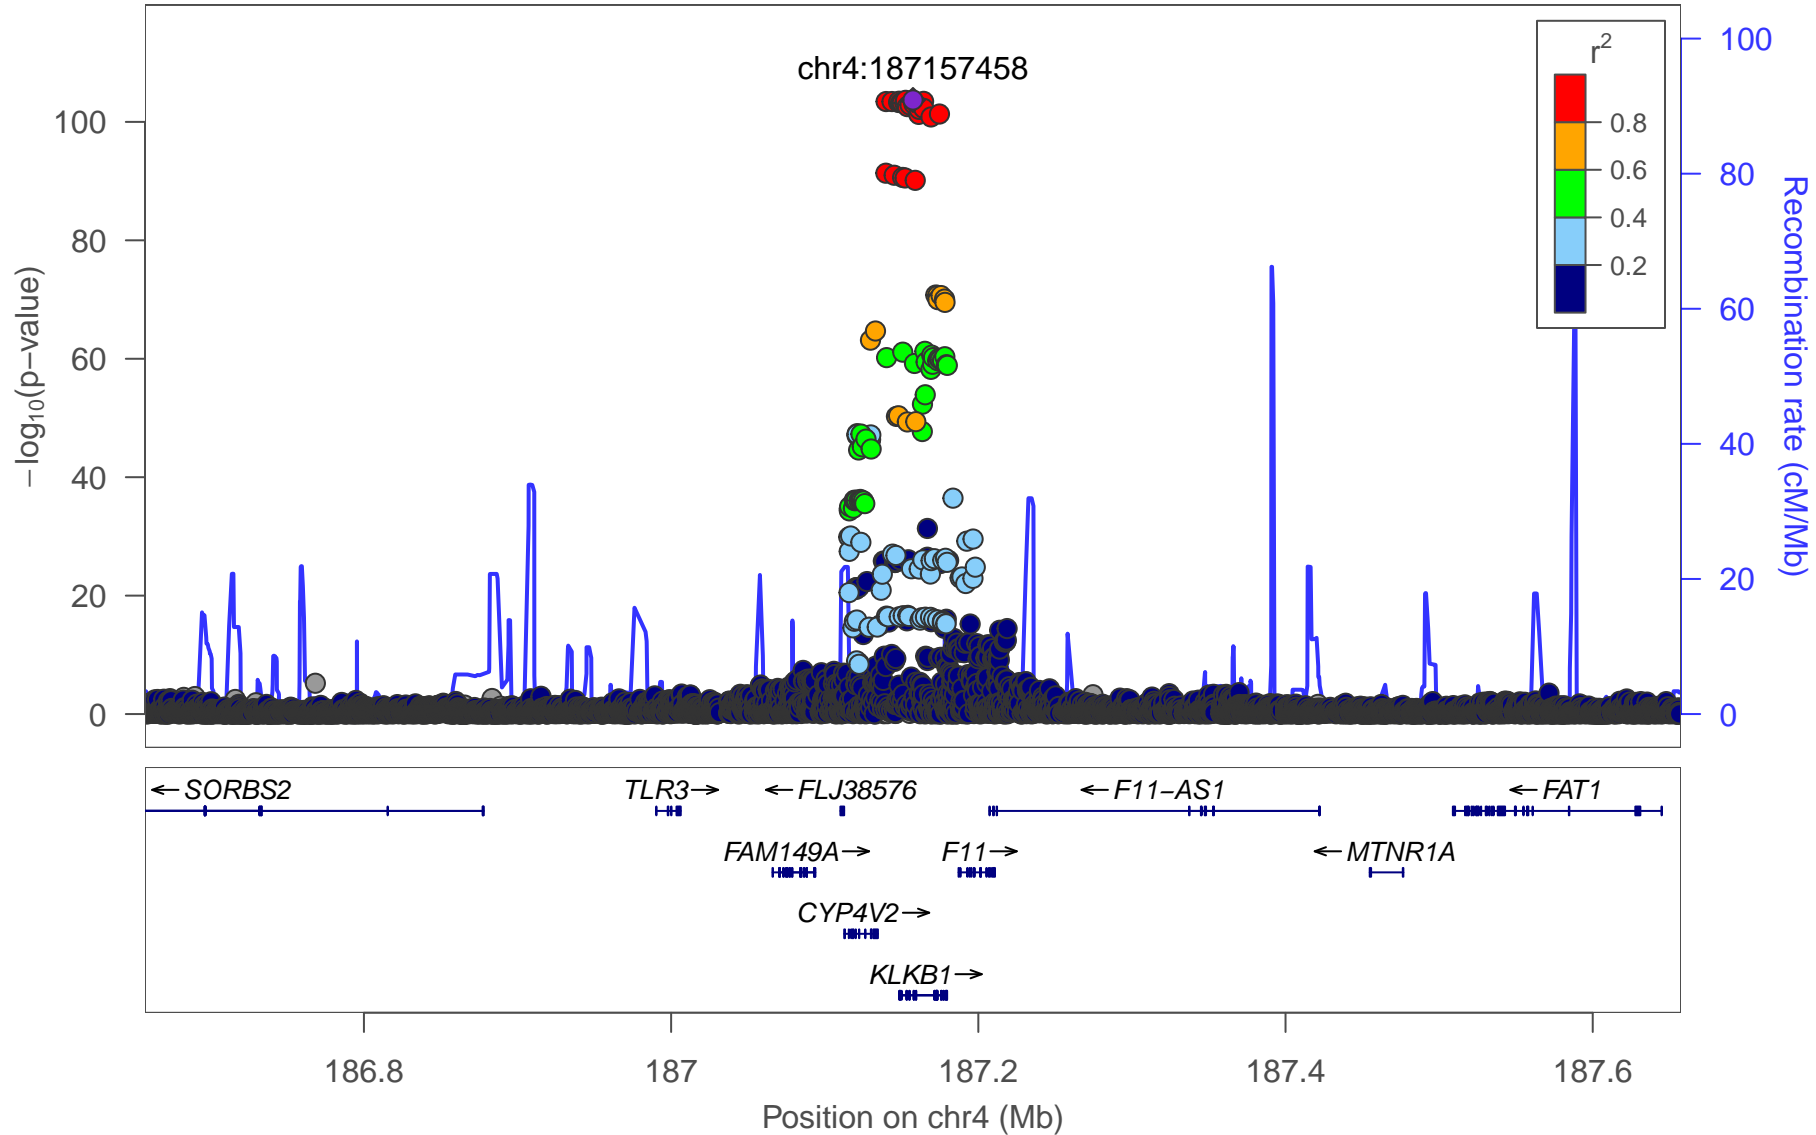

# 5\_1: Cit

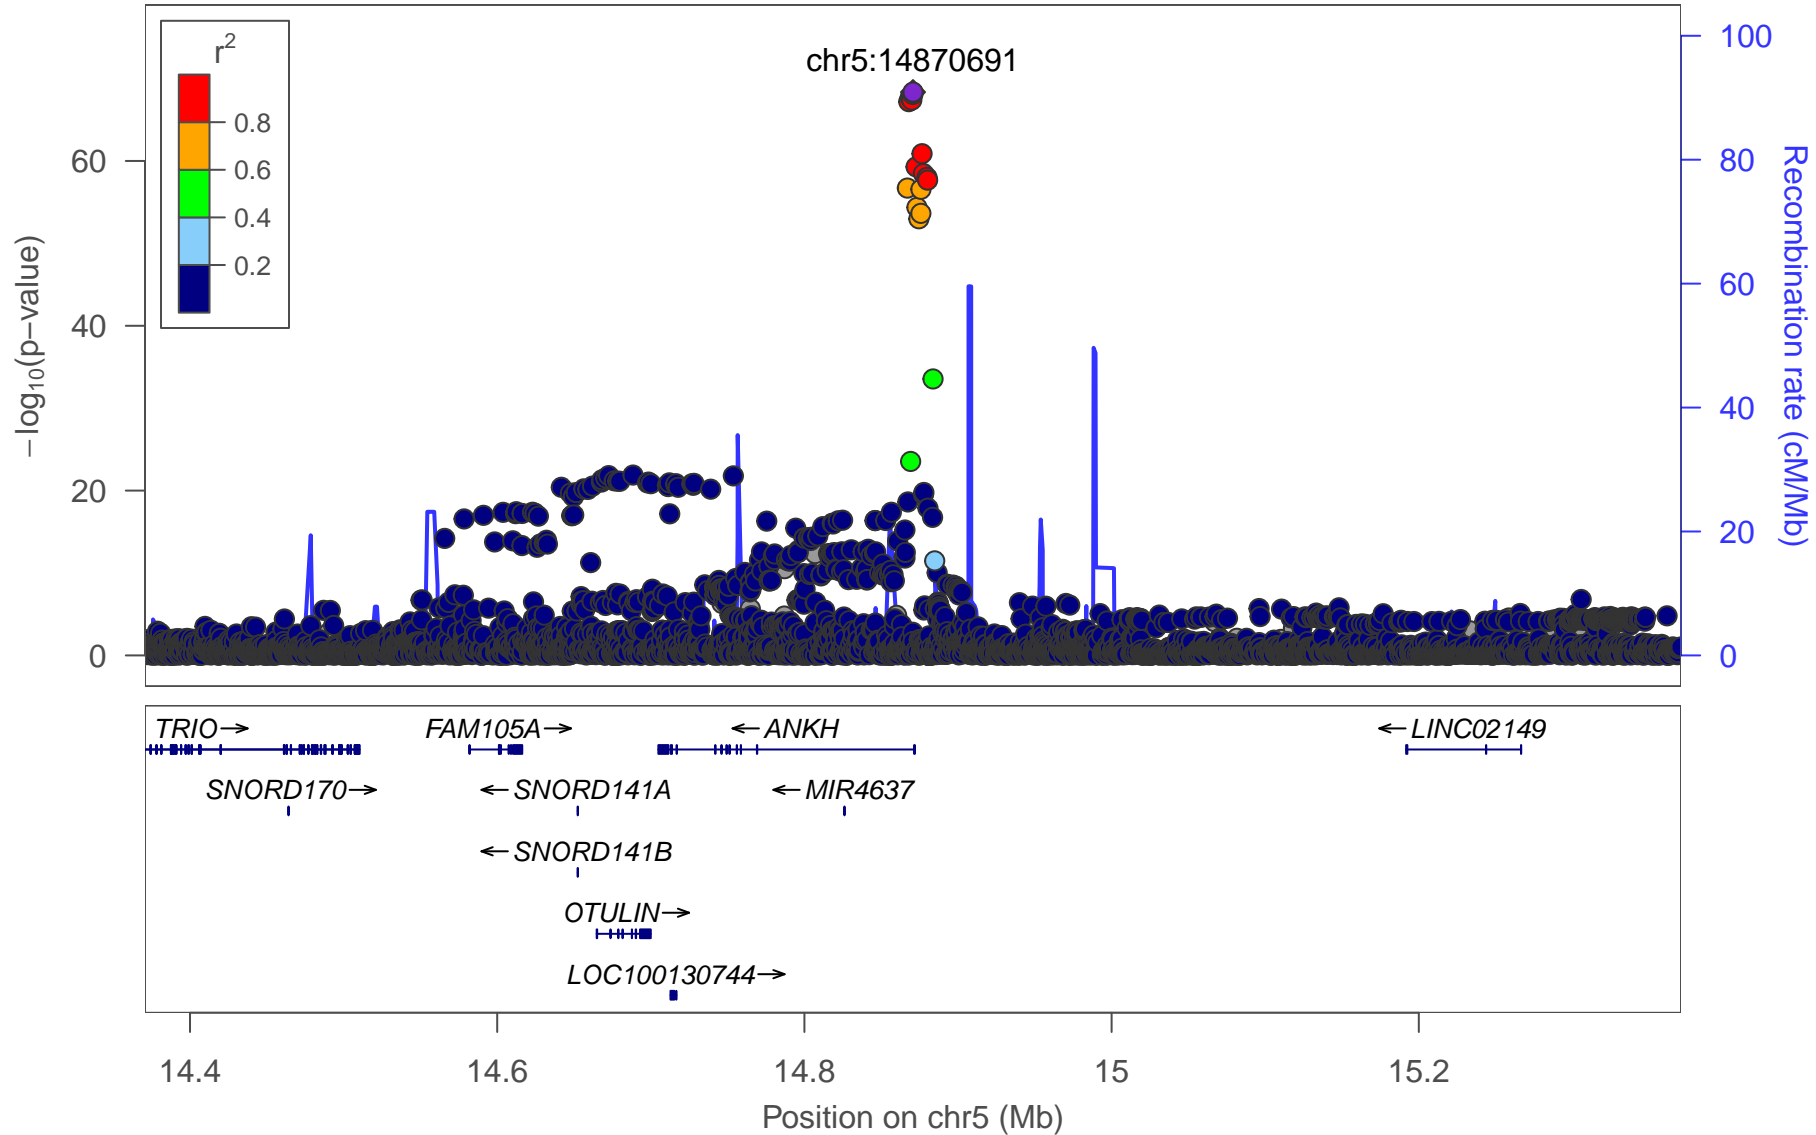

# 5\_2:Crea

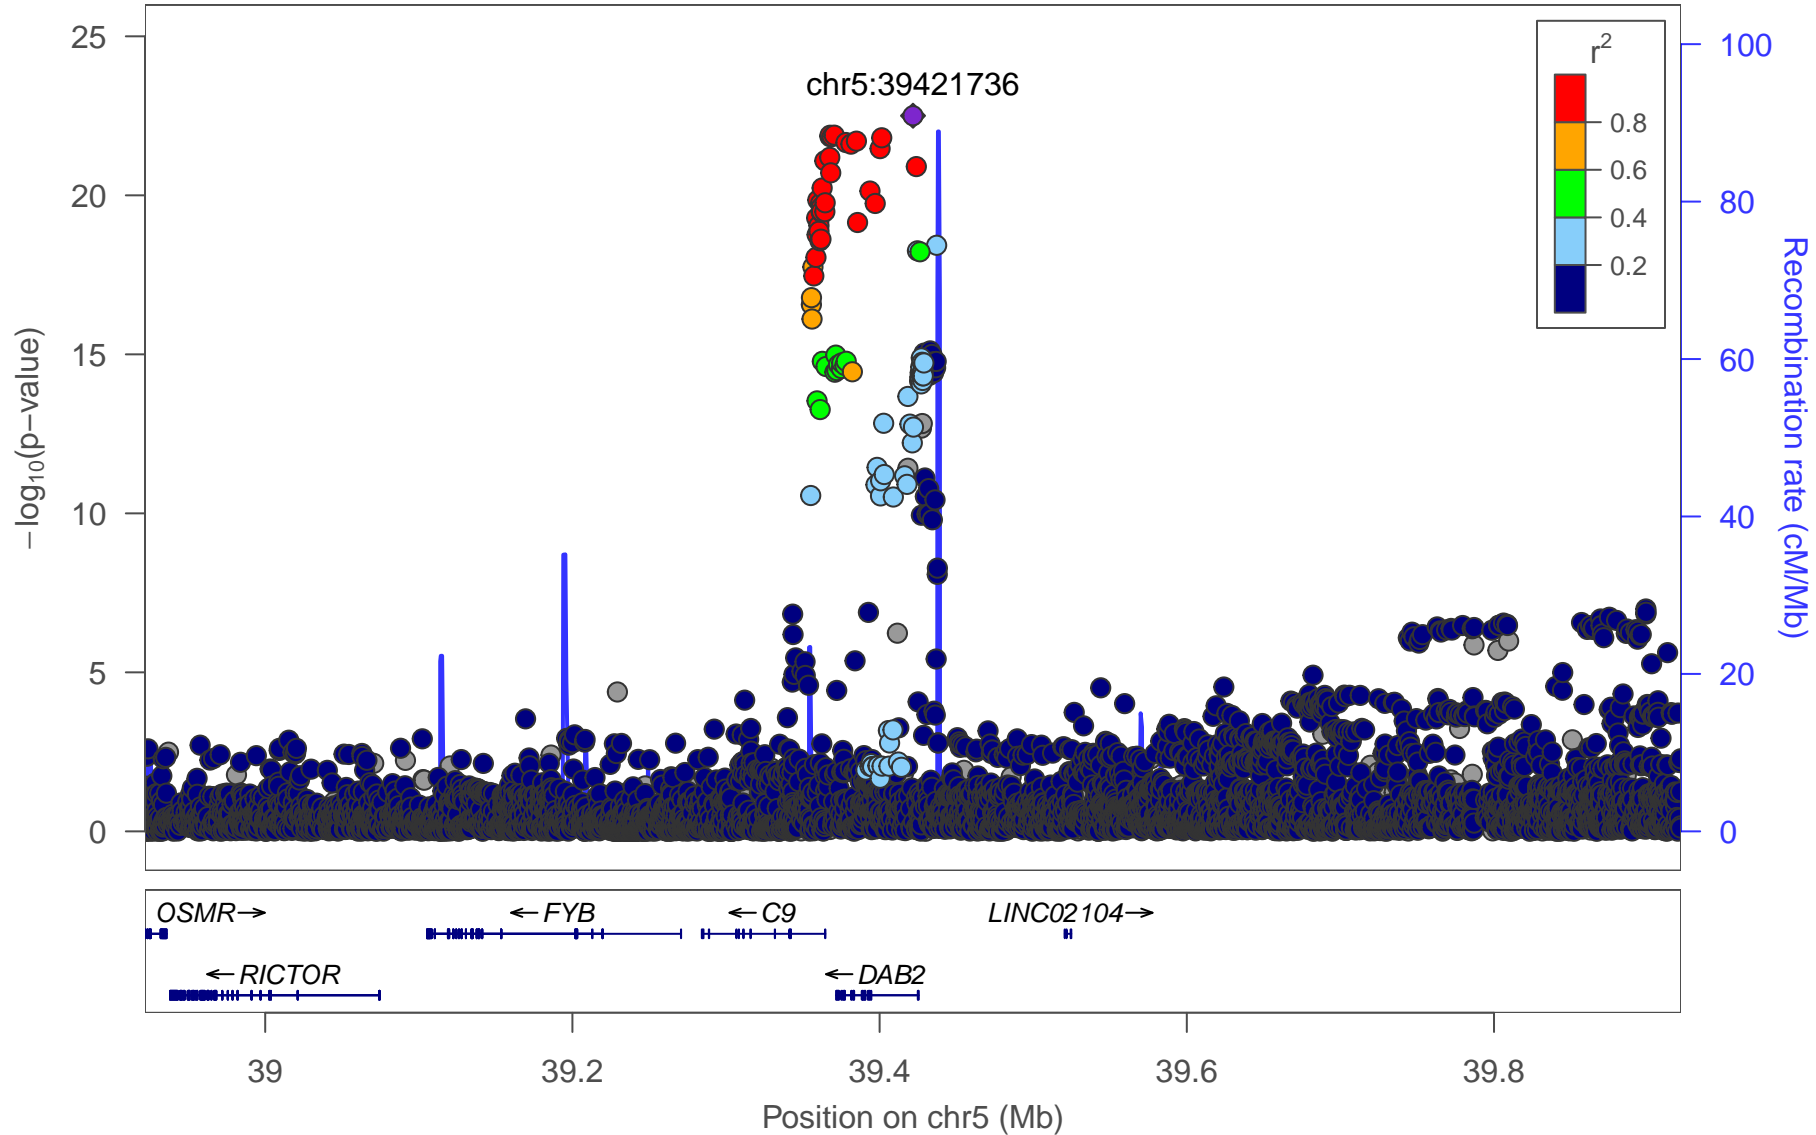

# 5\_3:Acetone

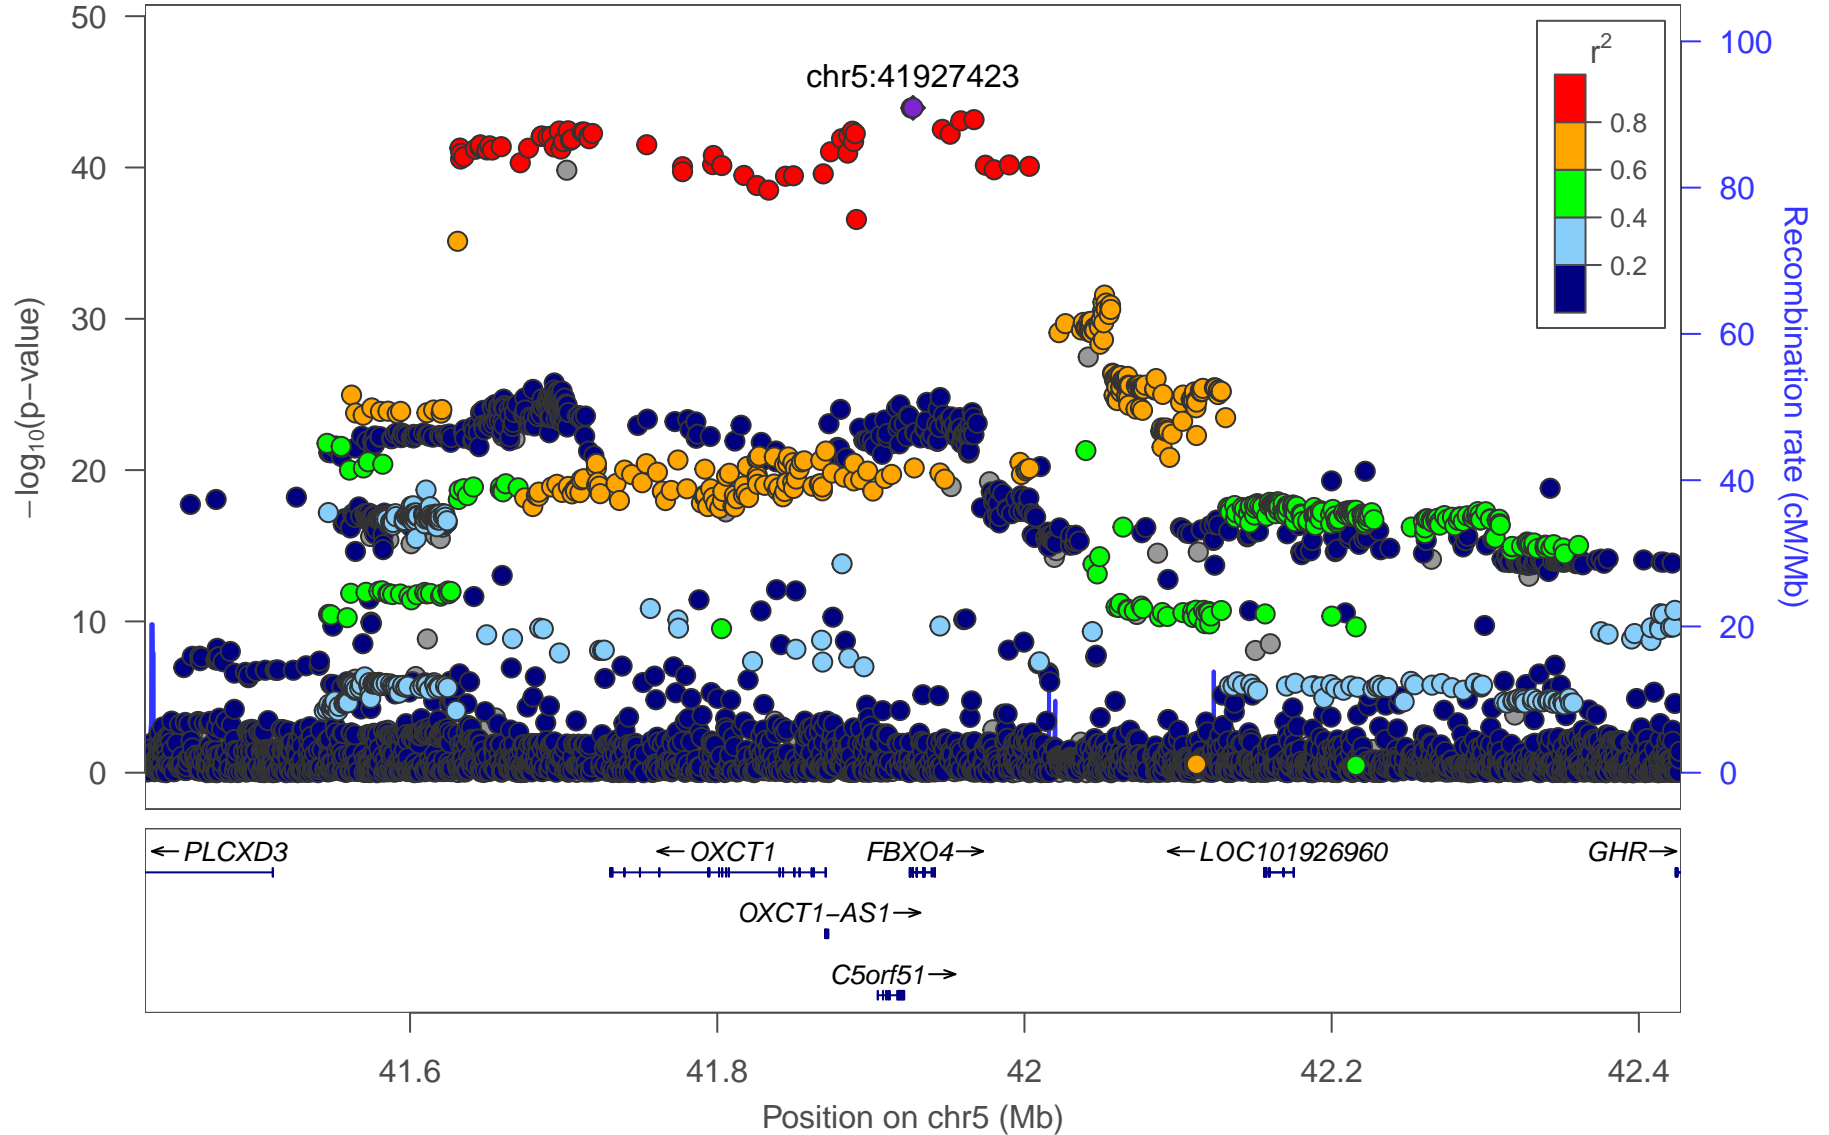



# 5\_4:M-VLDL-TG

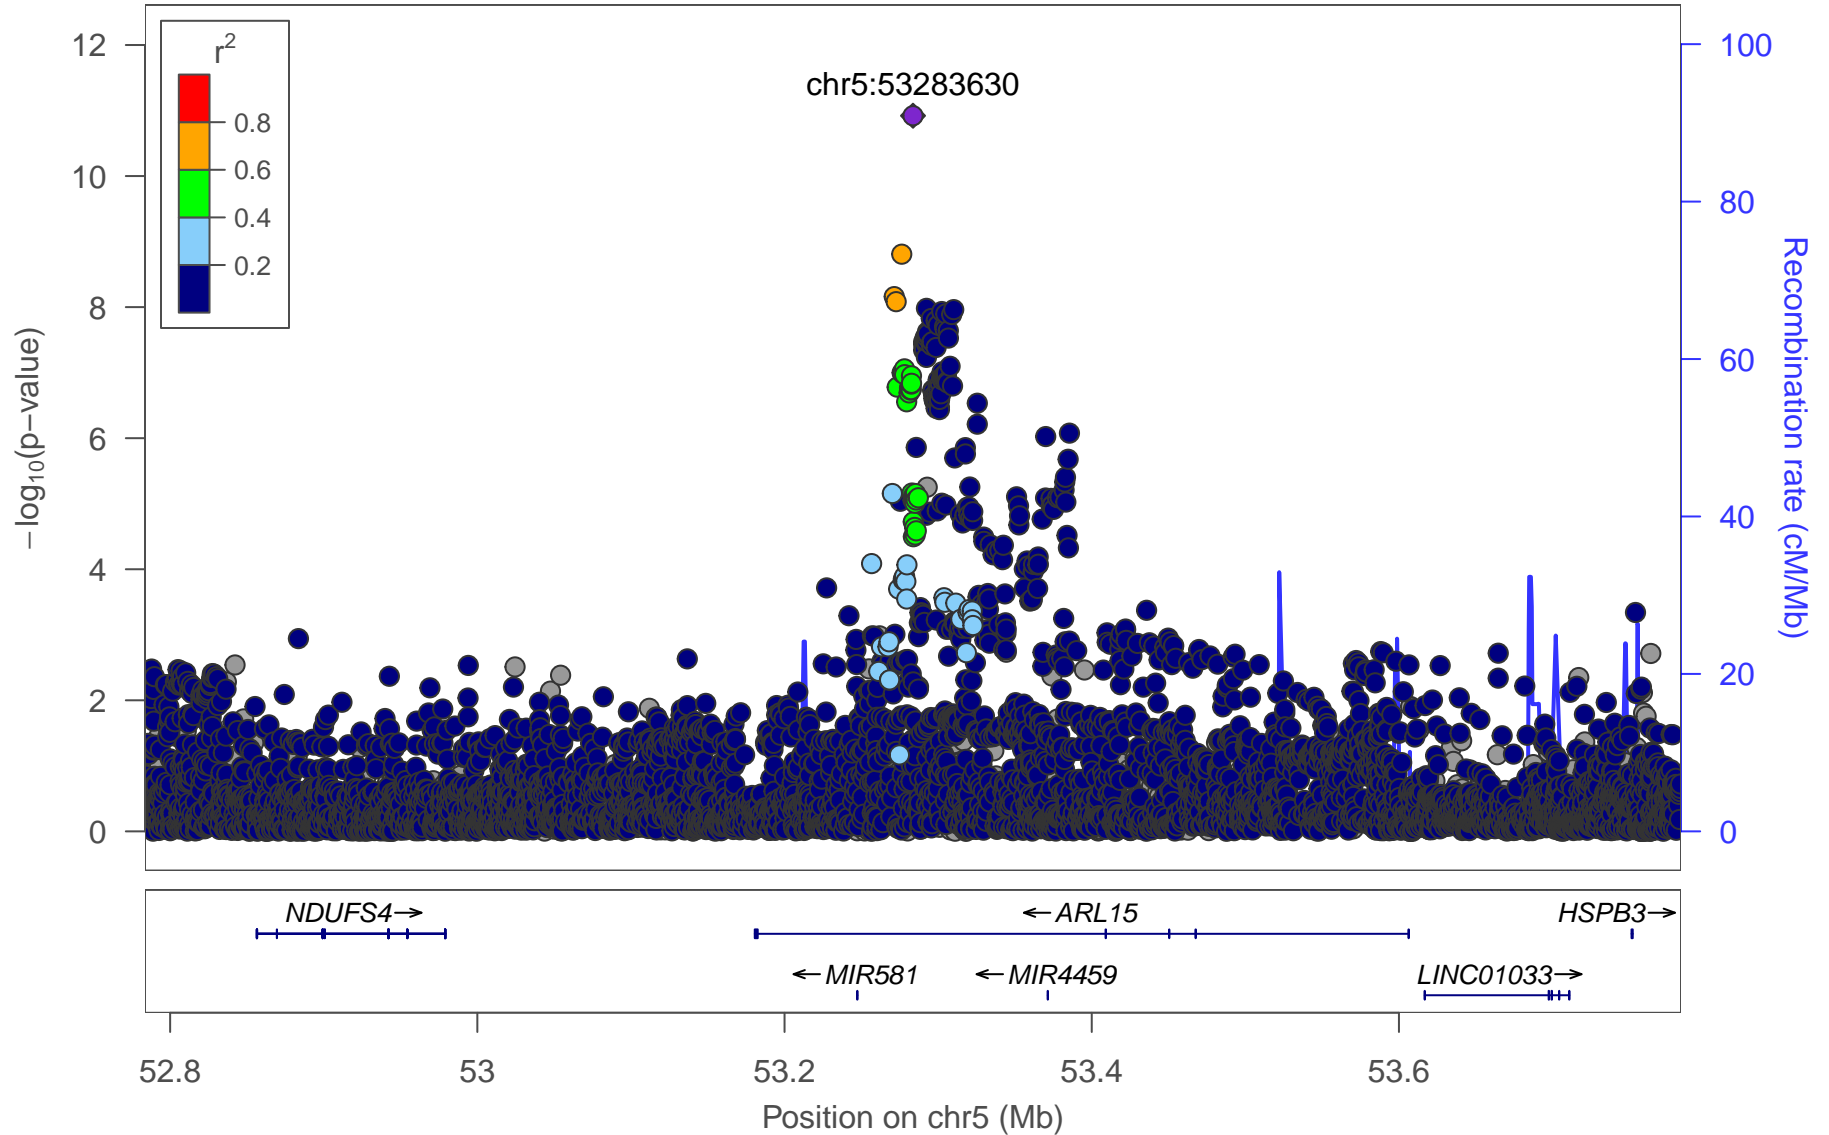

# 5\_5:M-VLDL-TG

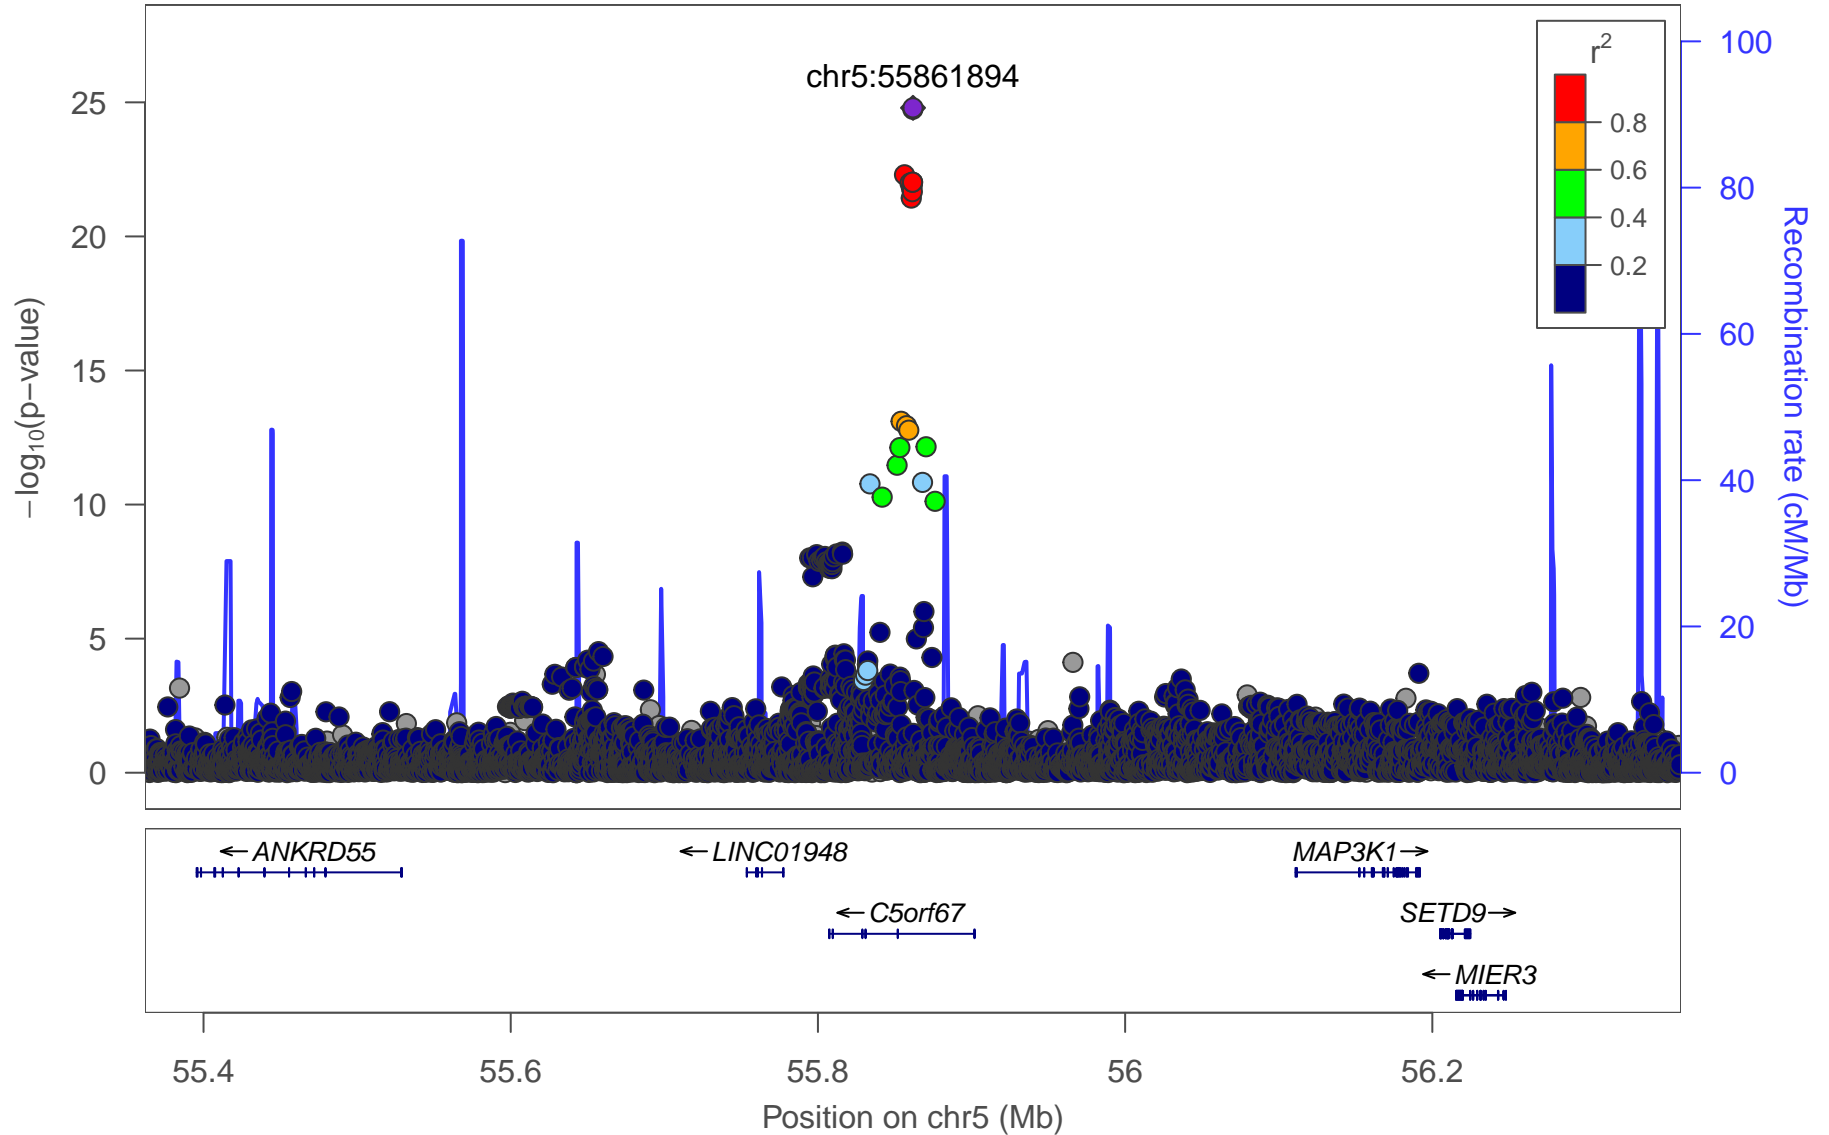

# 5\_6:Crea

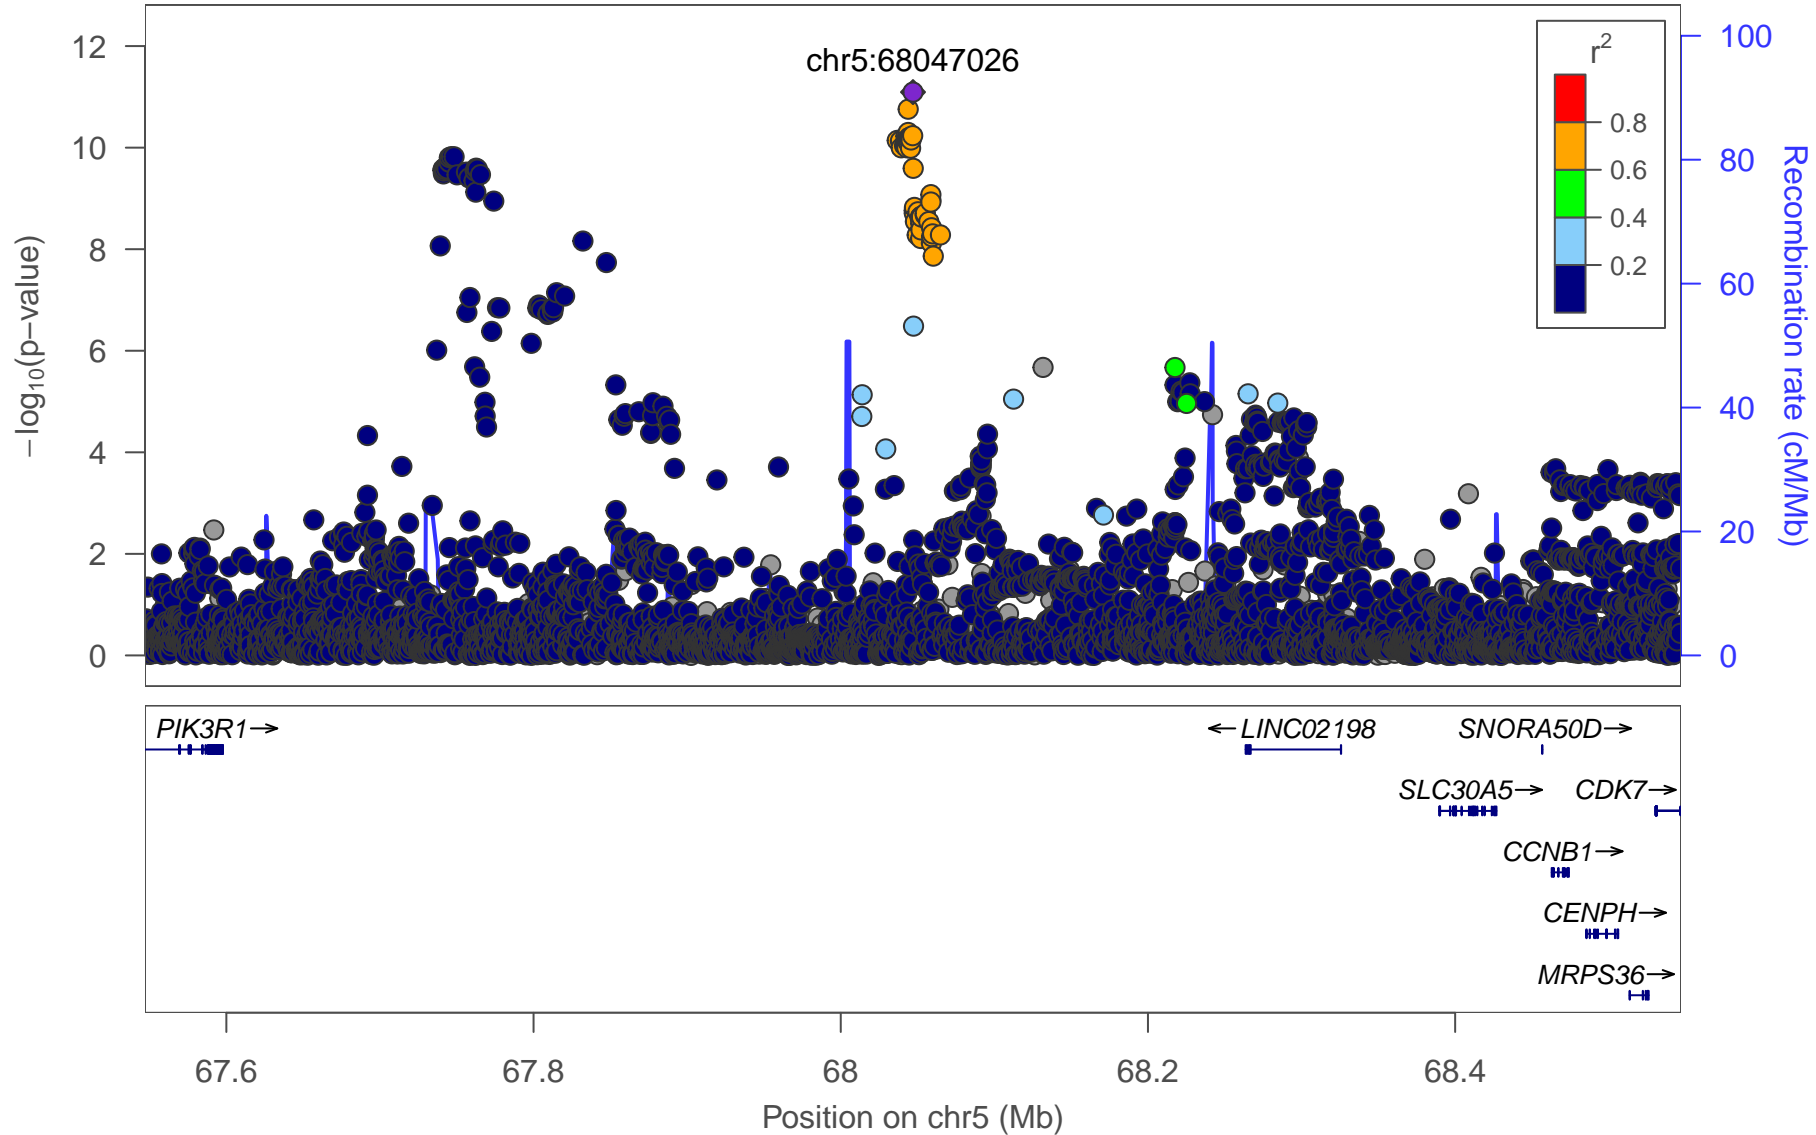

# 5\_7:XL-HDL-FC\_percent

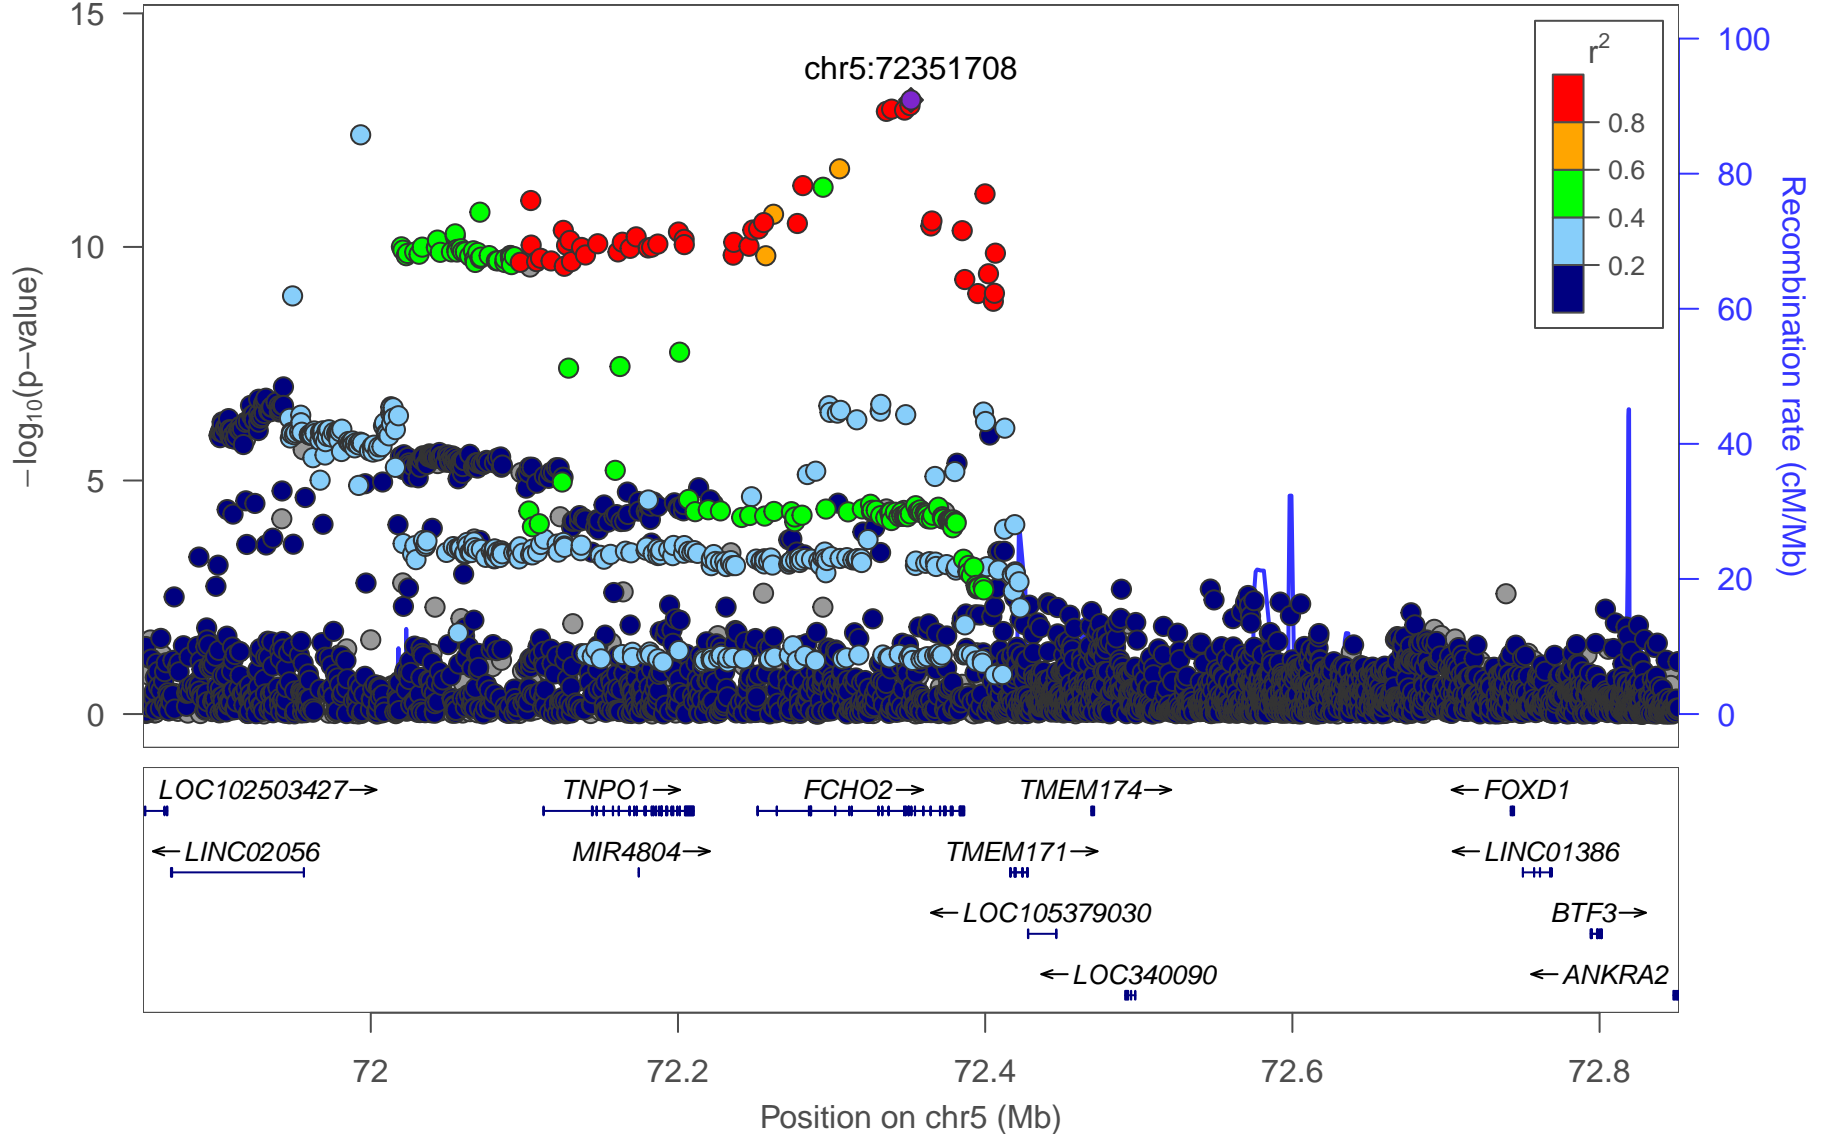

# 5\_8:L-LDL-CE

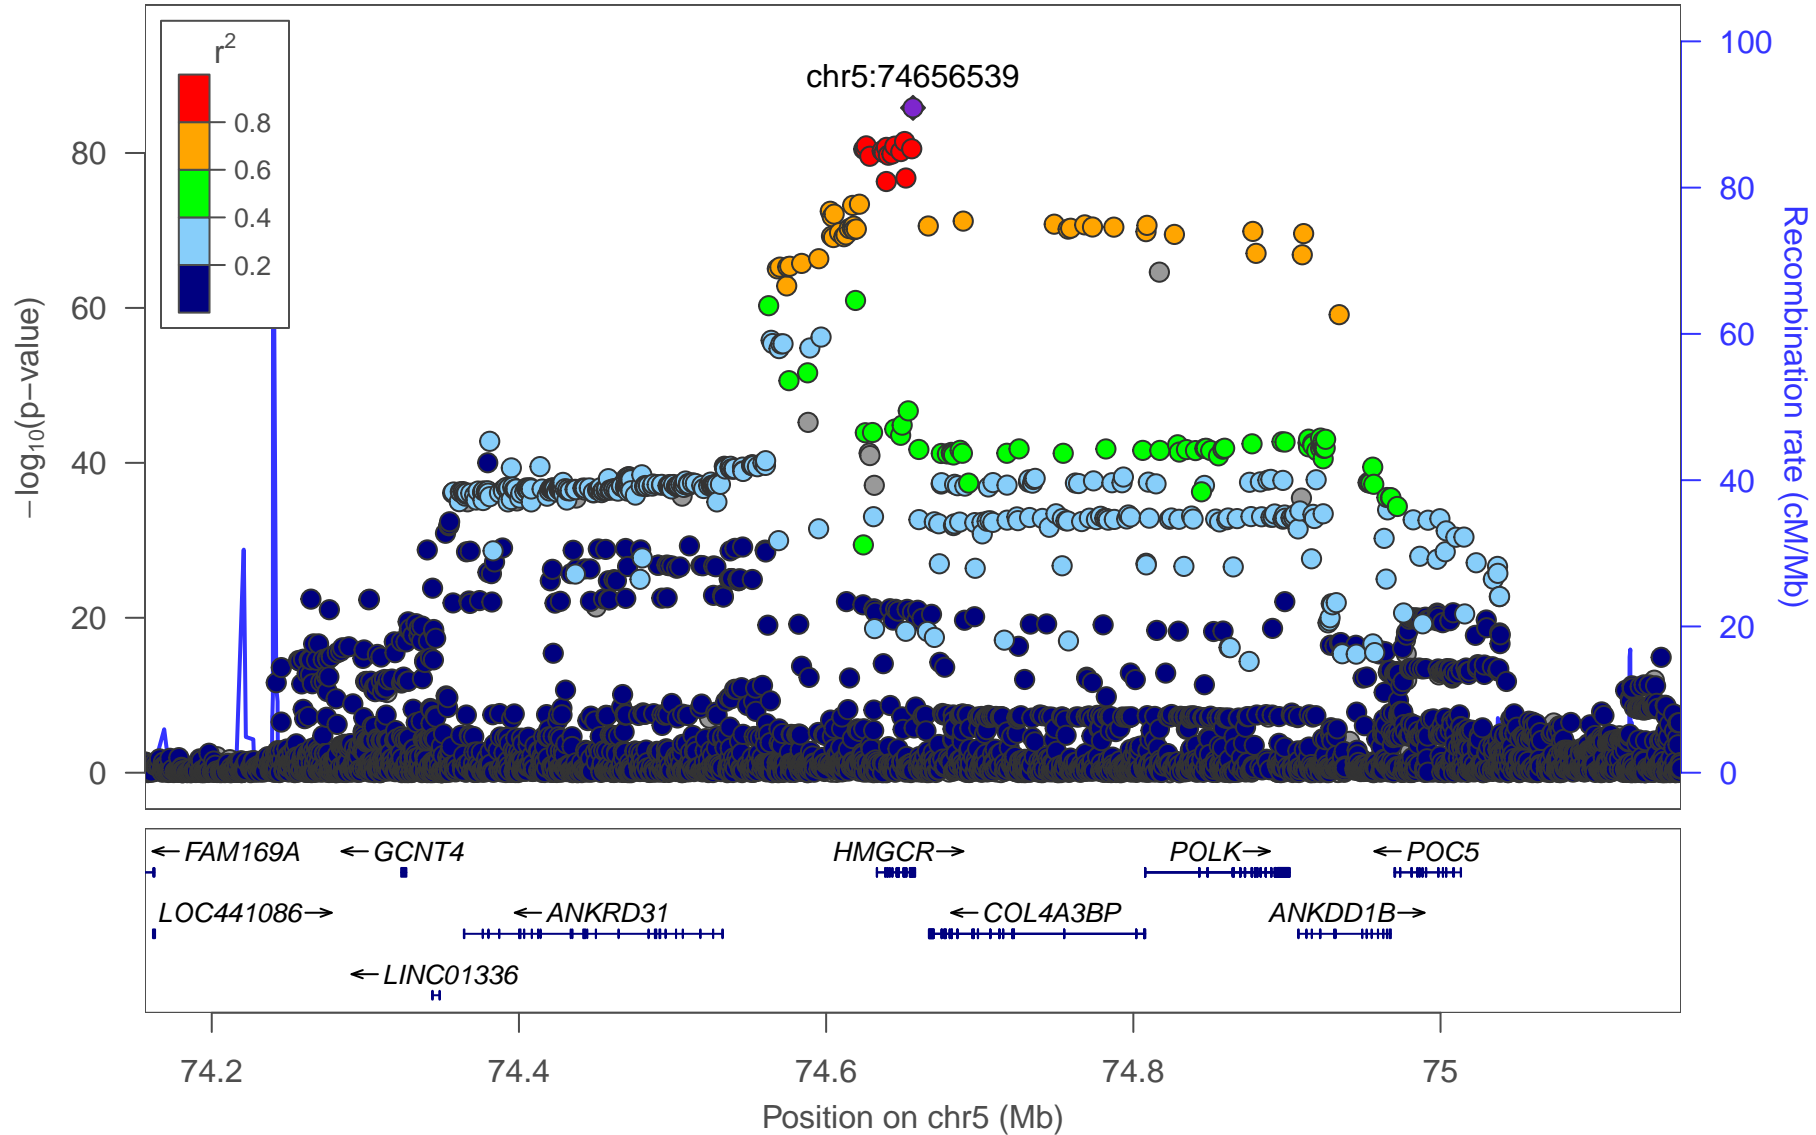

# 5\_9:Glc

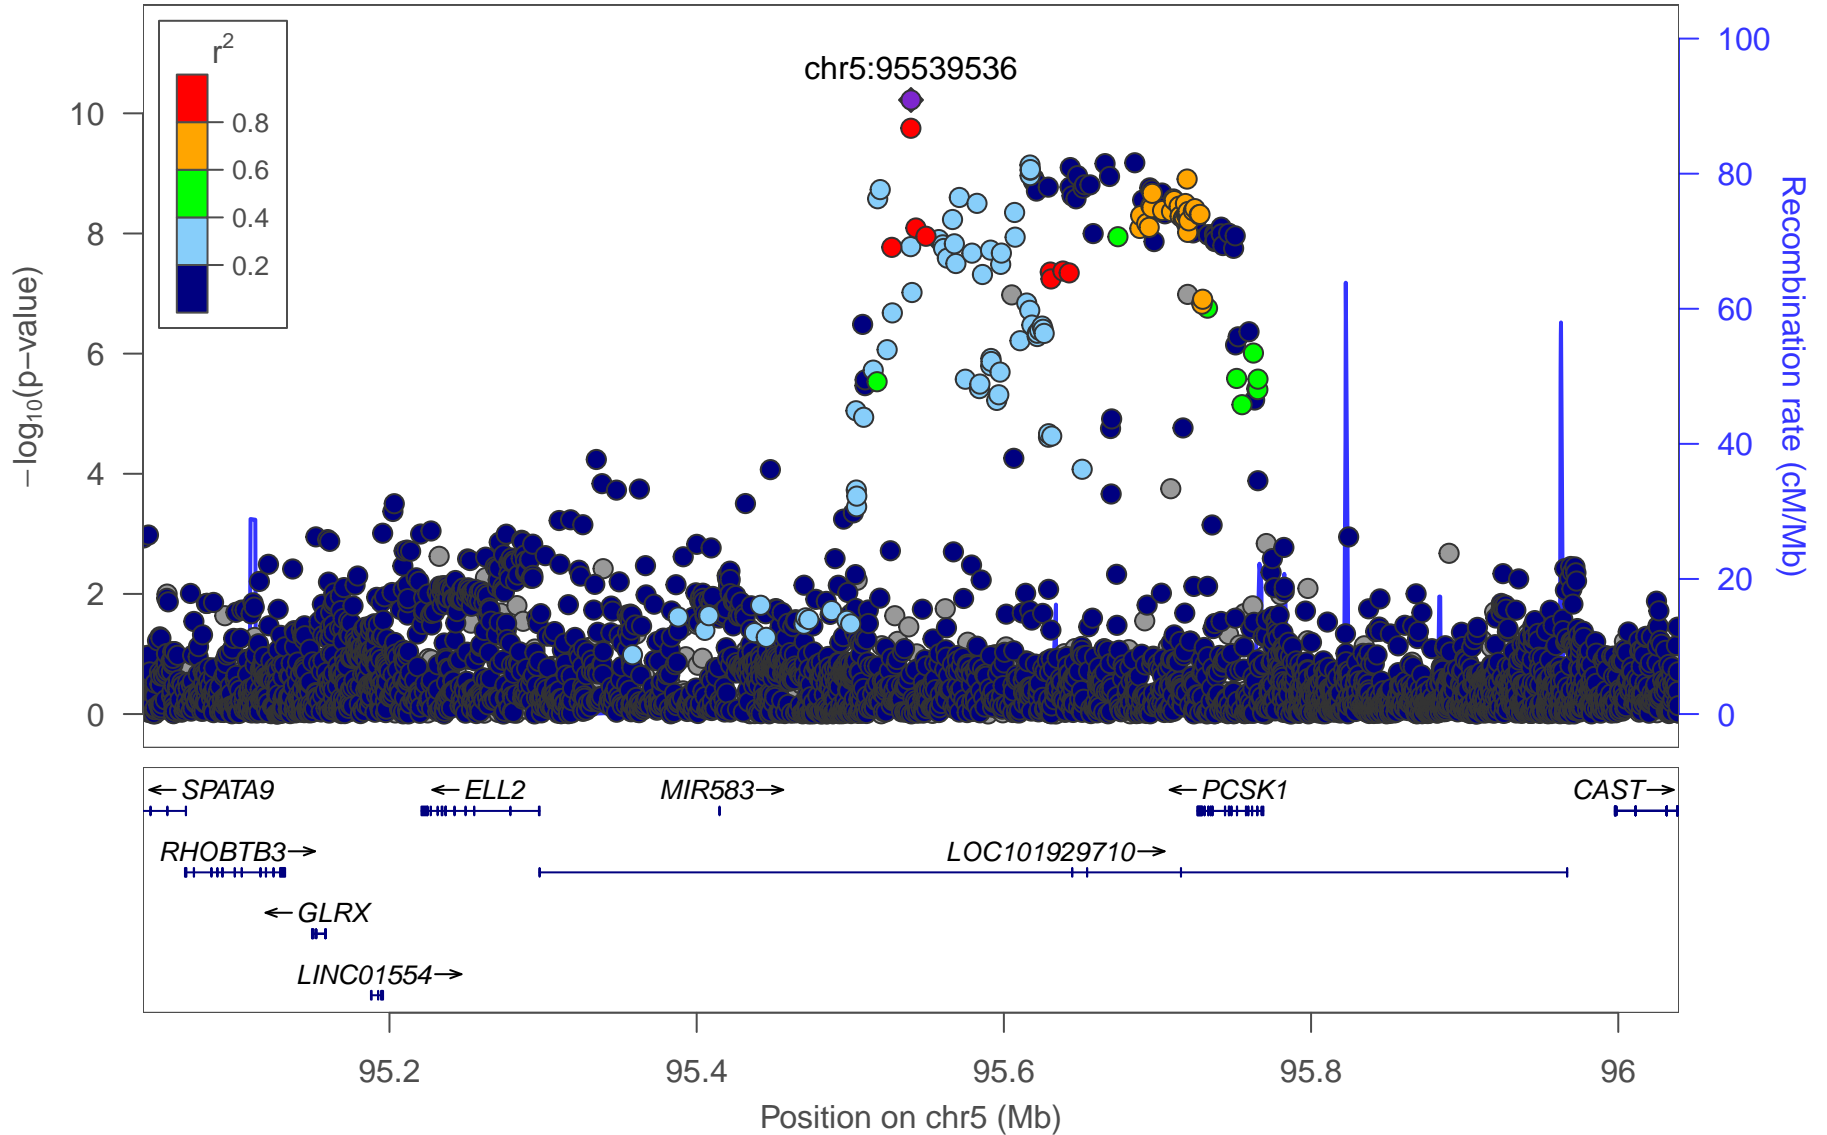

# 5\_10:L-LDL-C\_percent

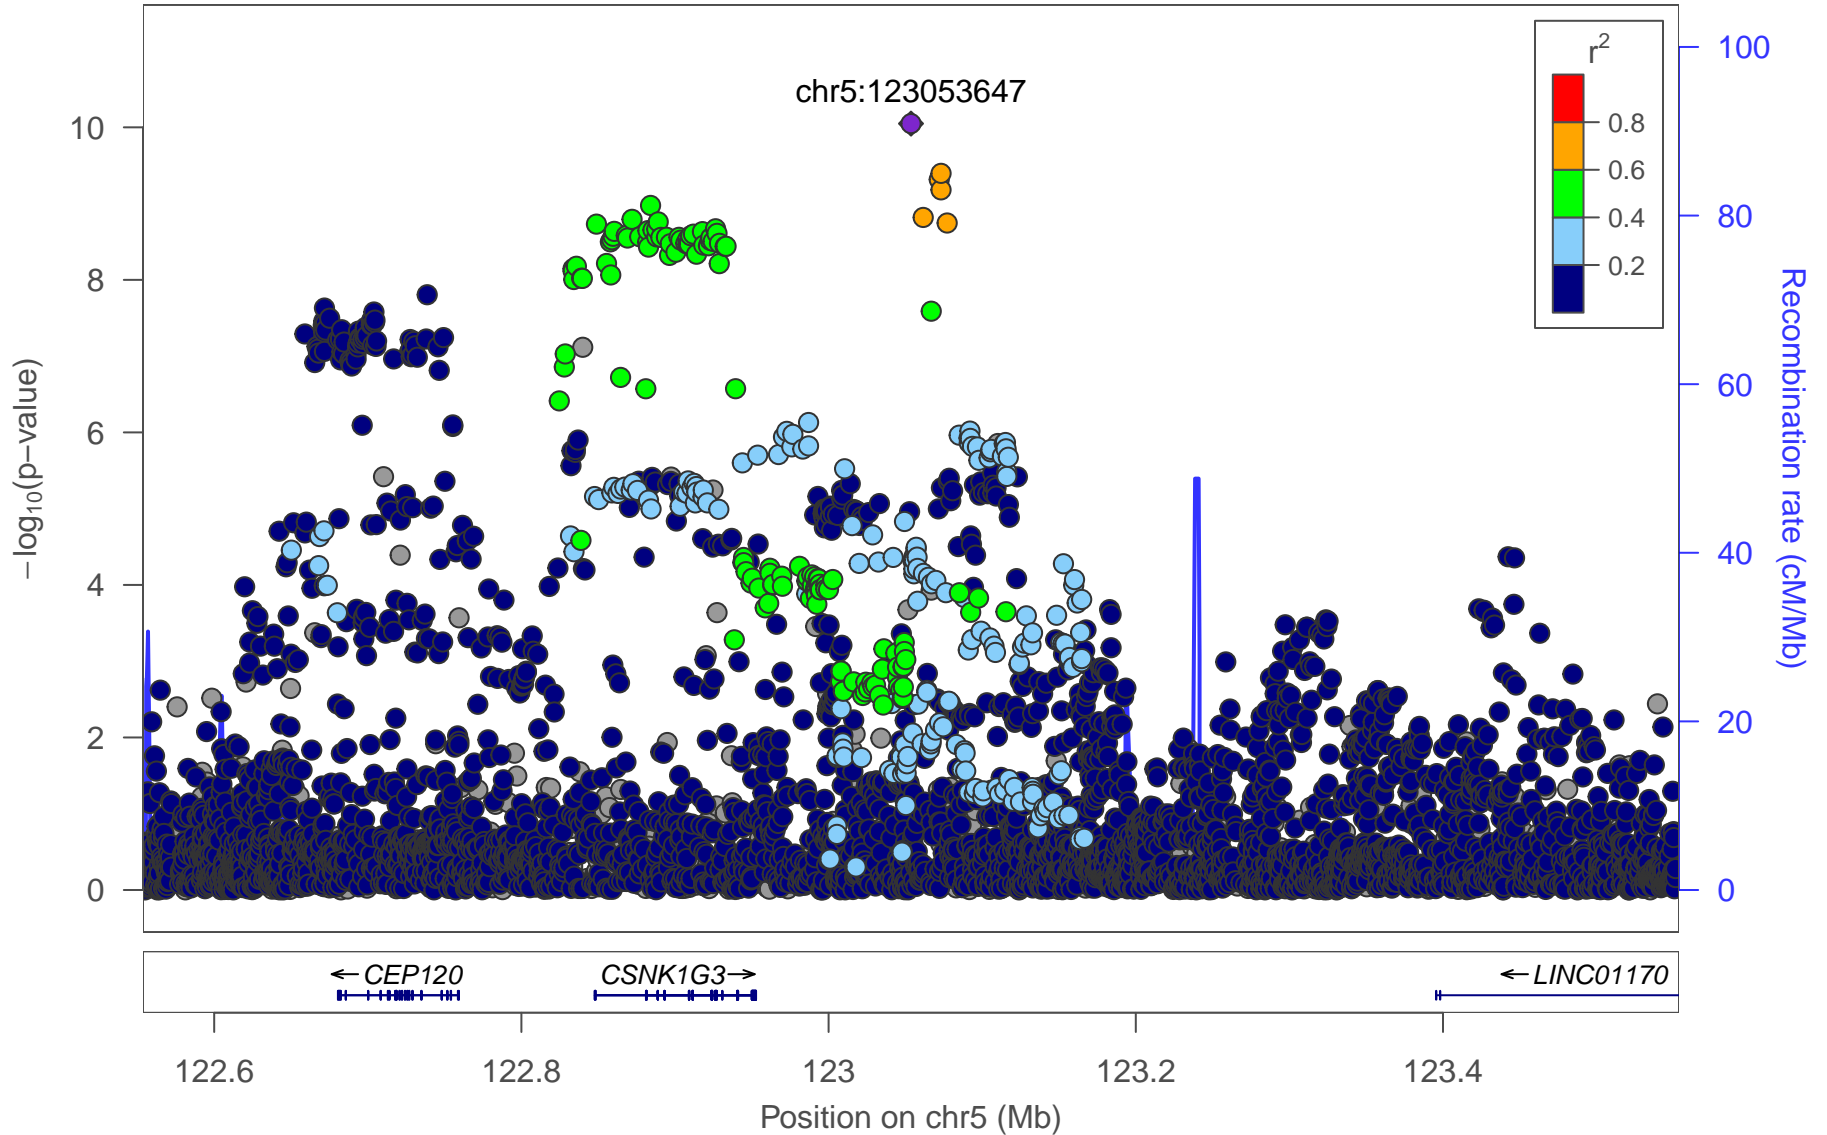

# 5\_11:LDL-D

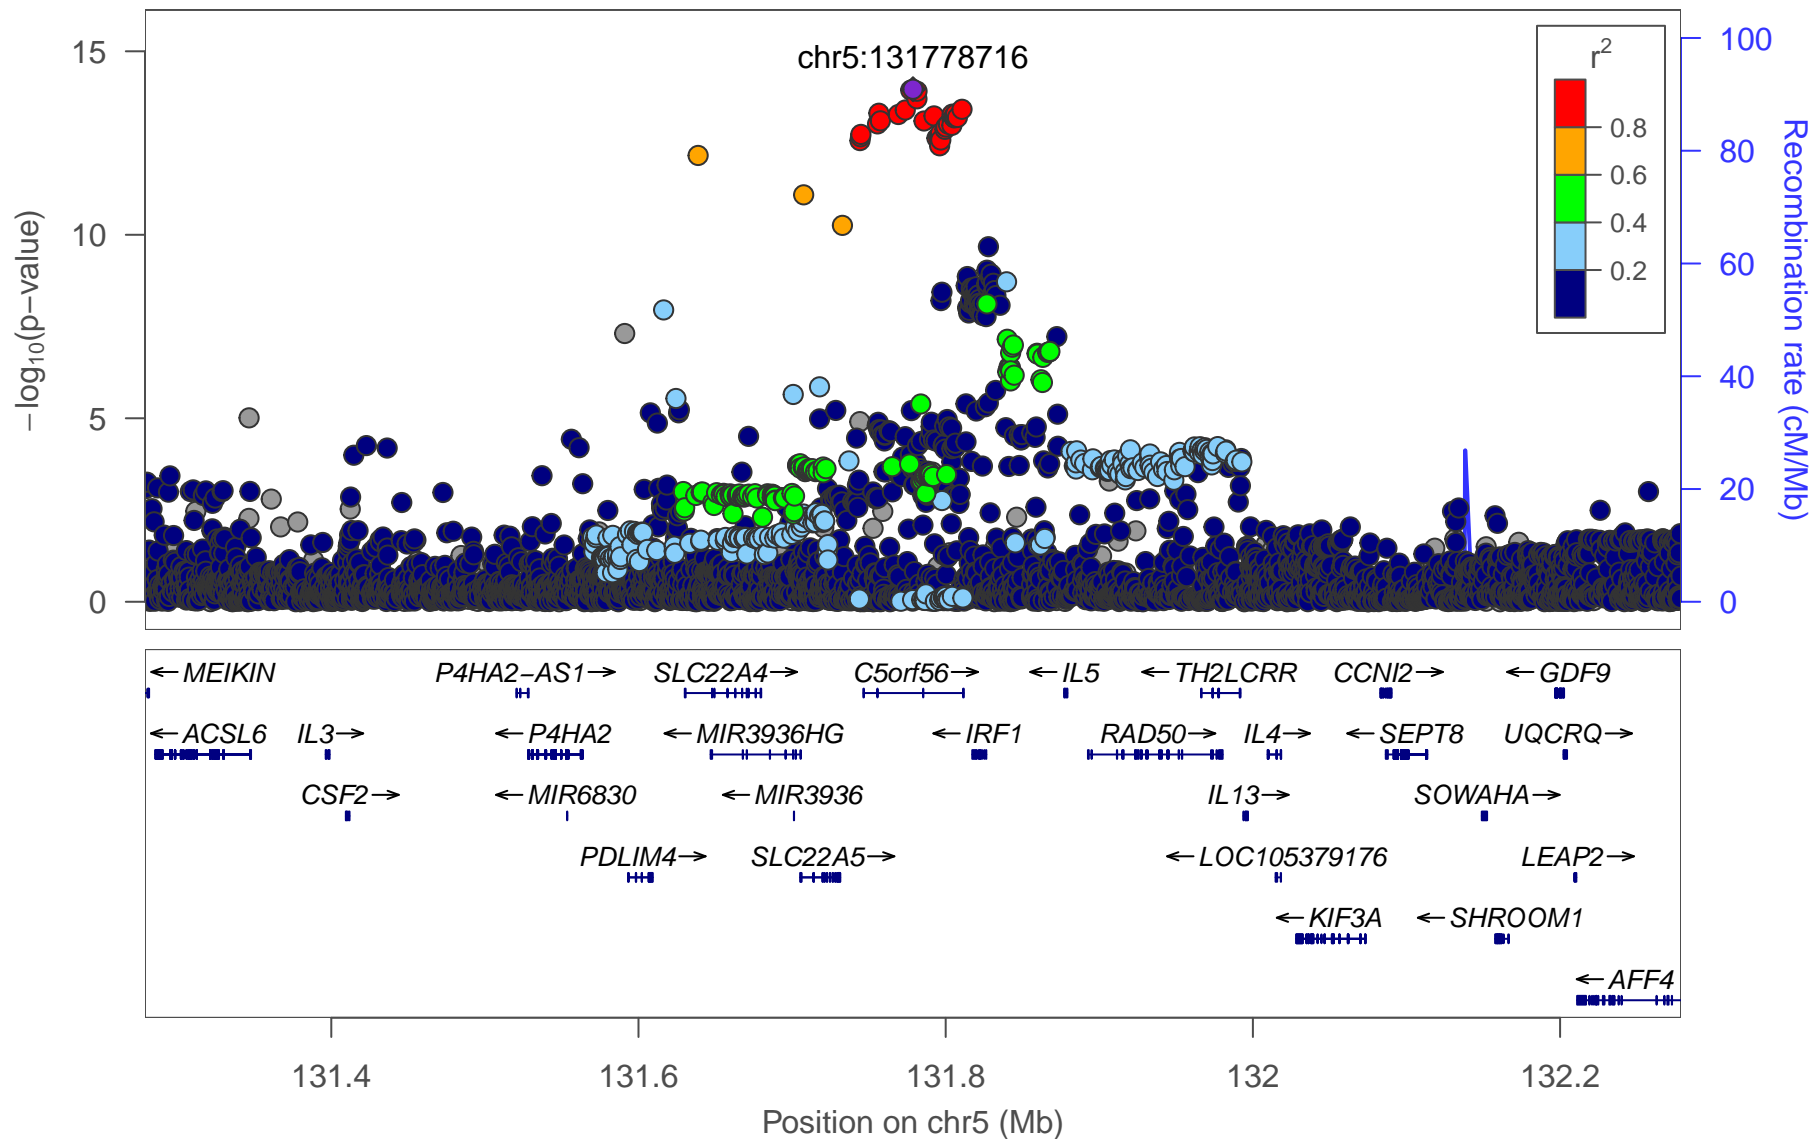



# 5\_12:Ala

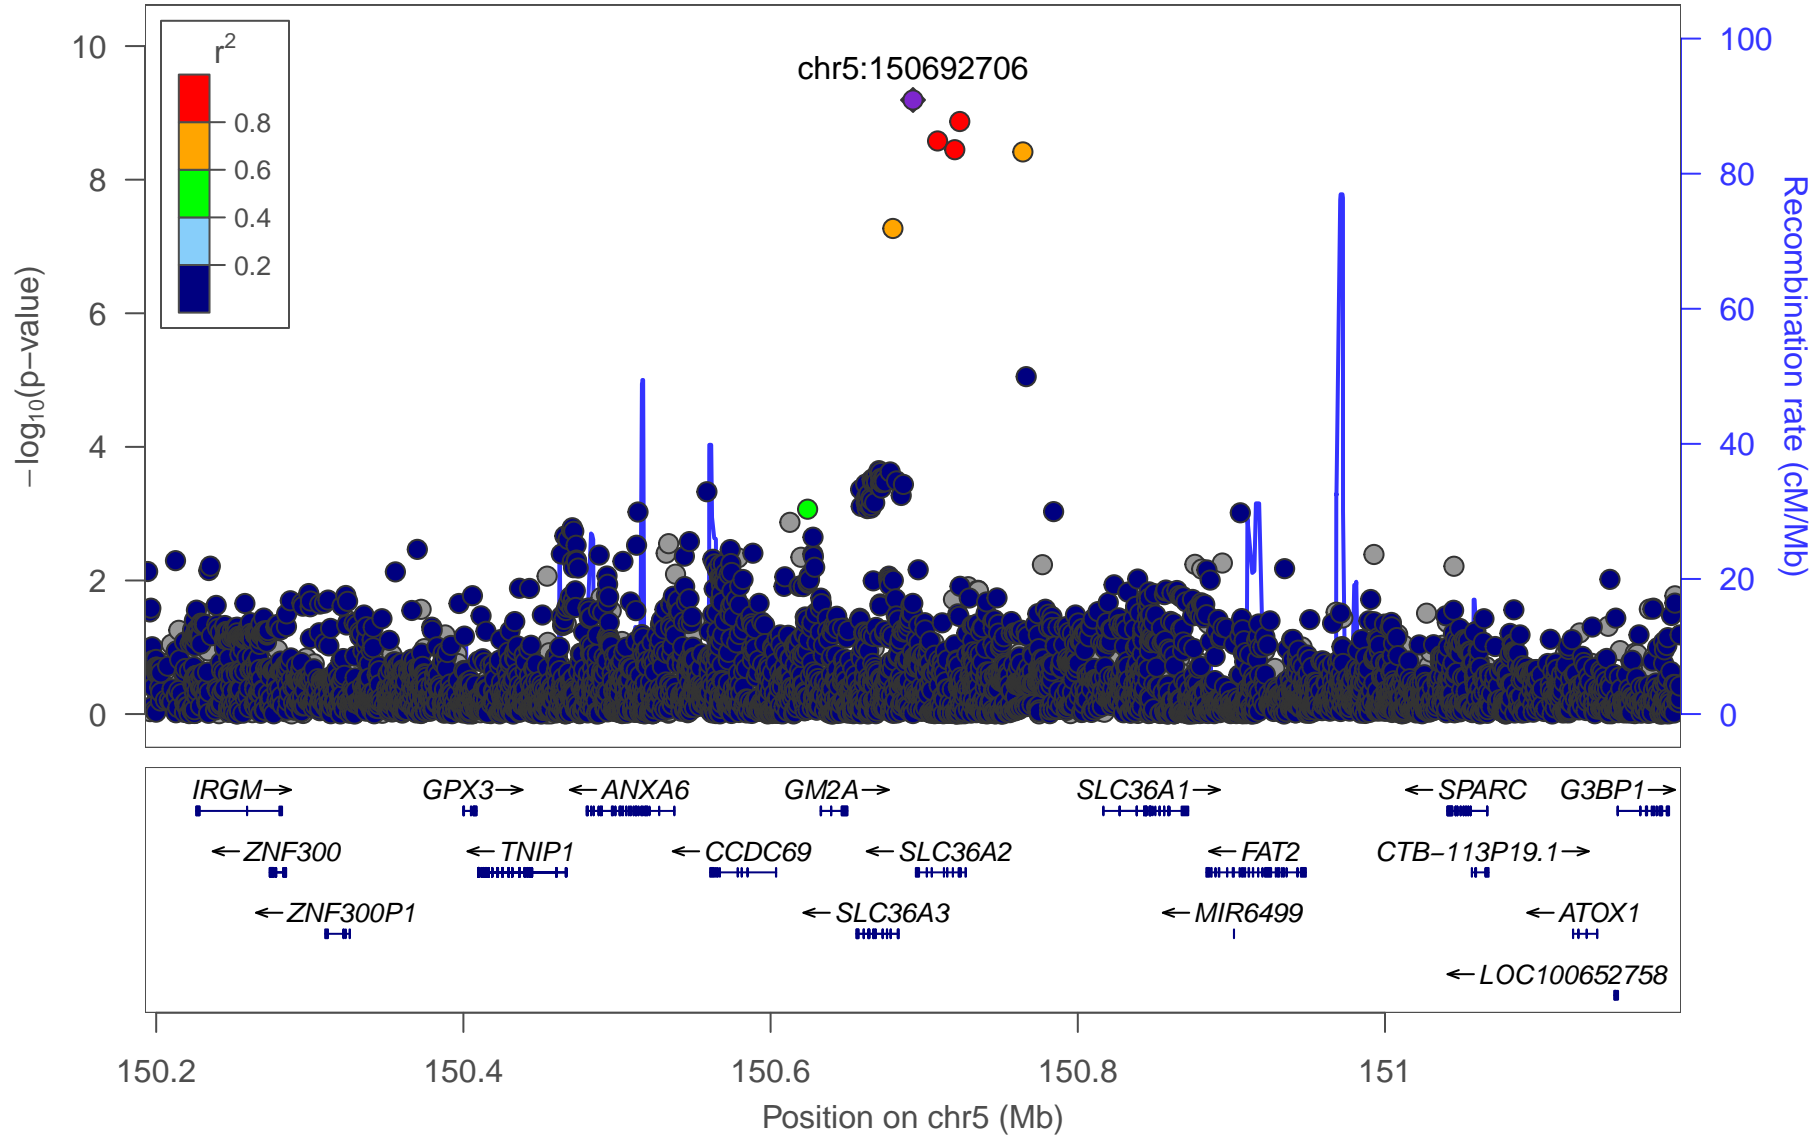

# 5\_13:ApoB

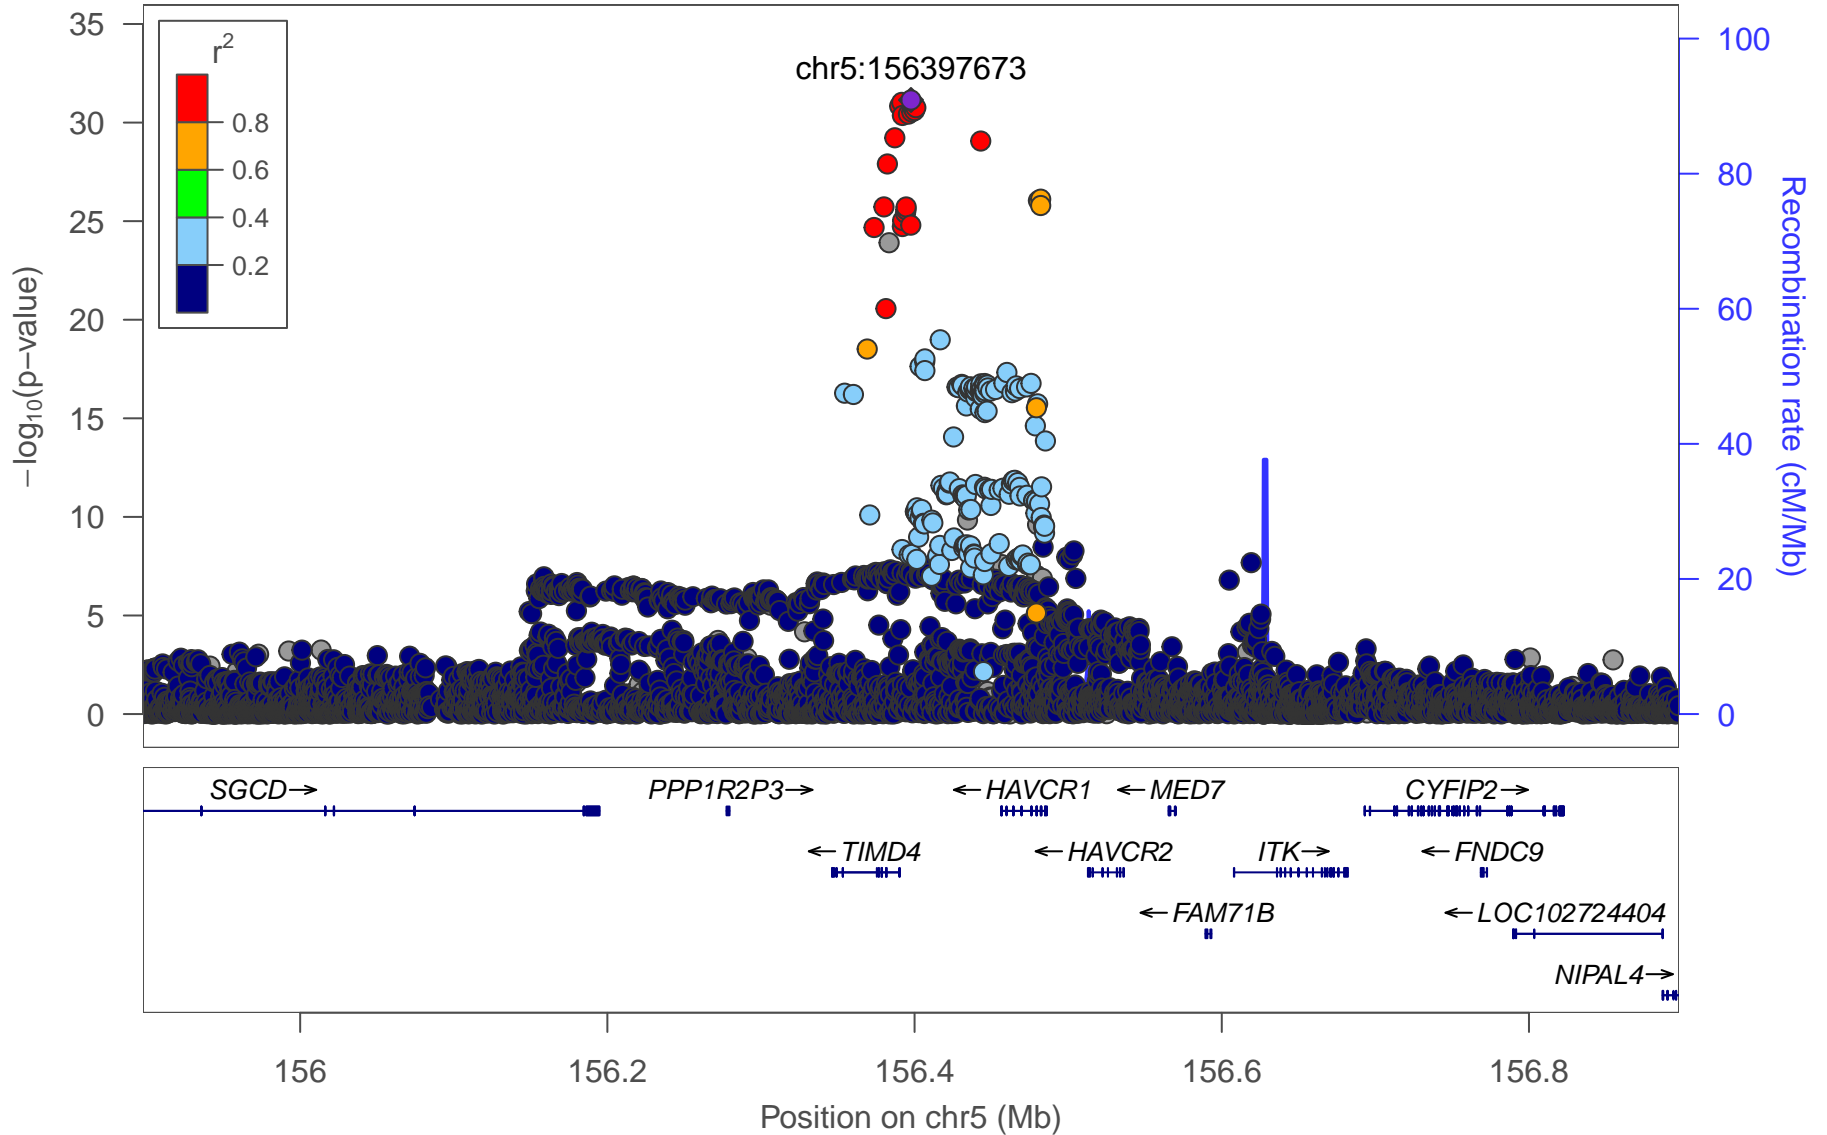

# 5\_14:VLDL-D

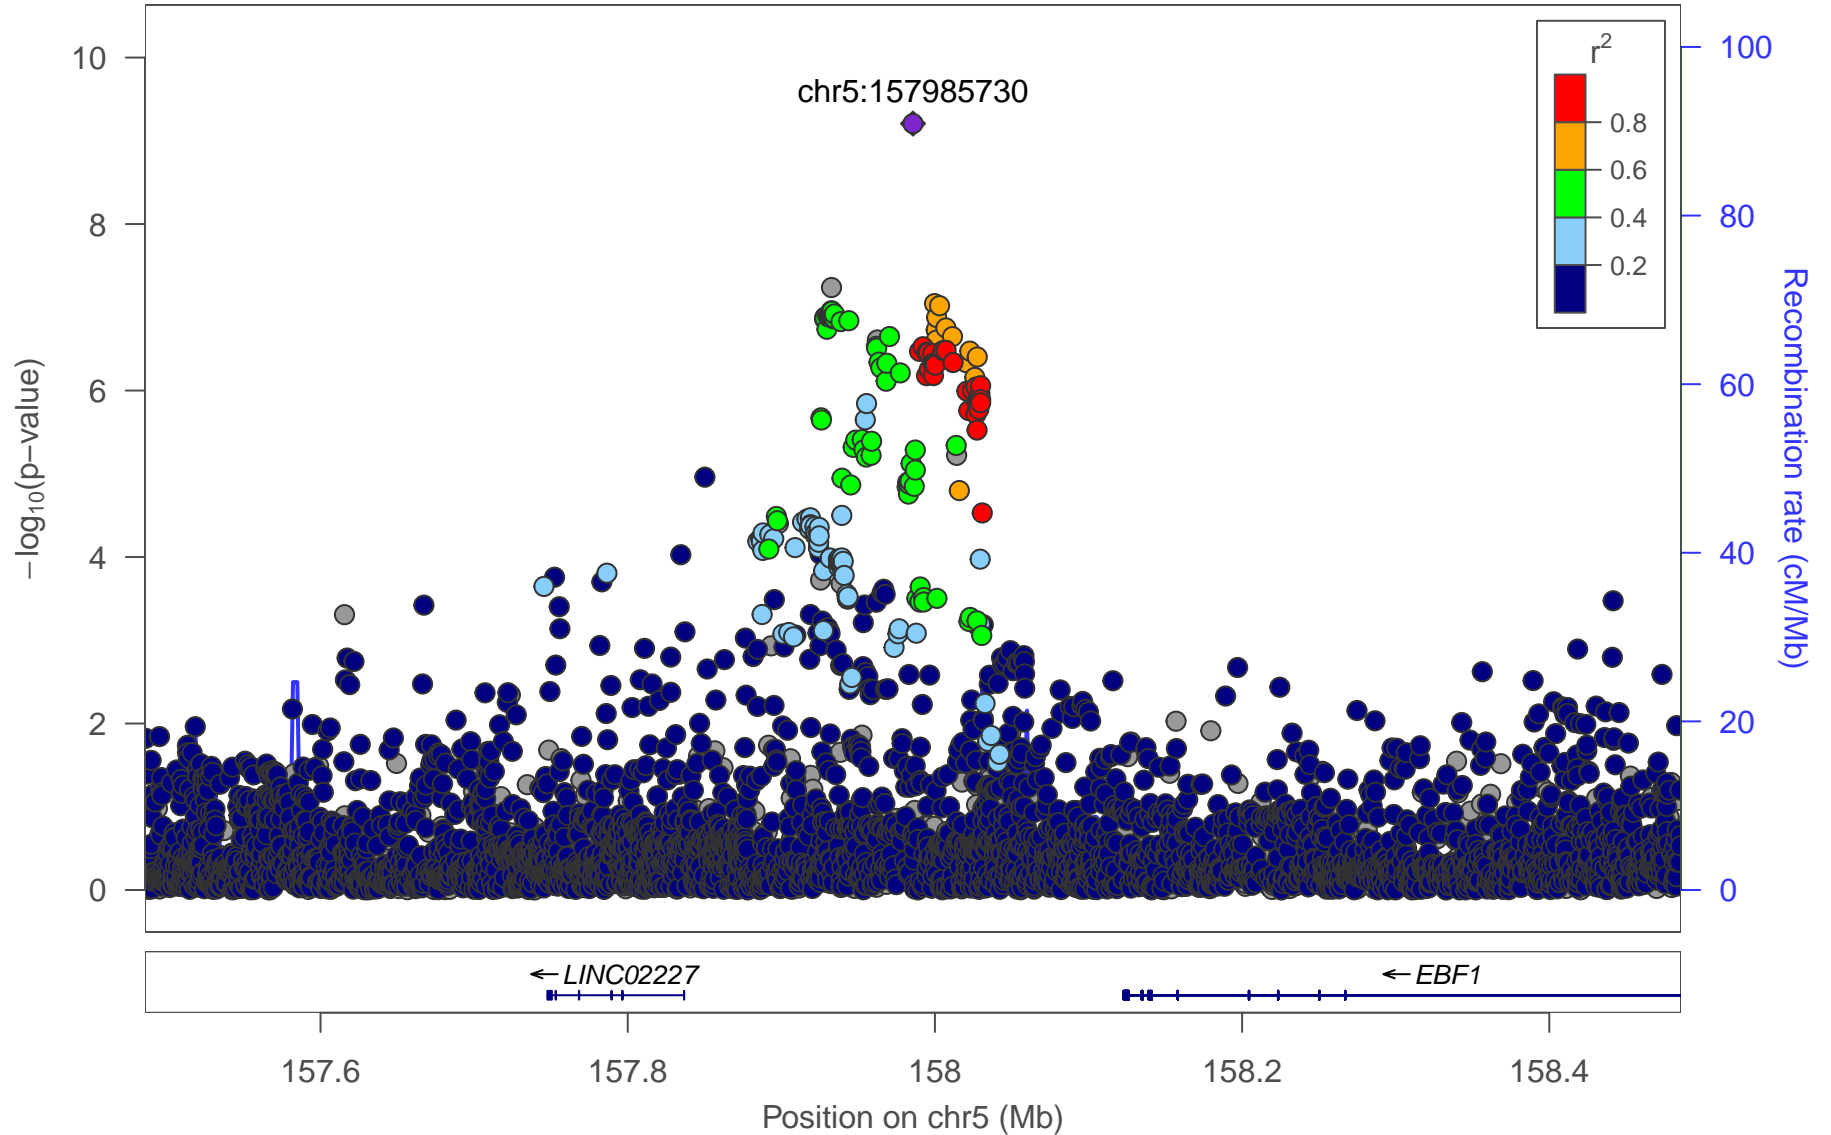

# 5\_15:Gln

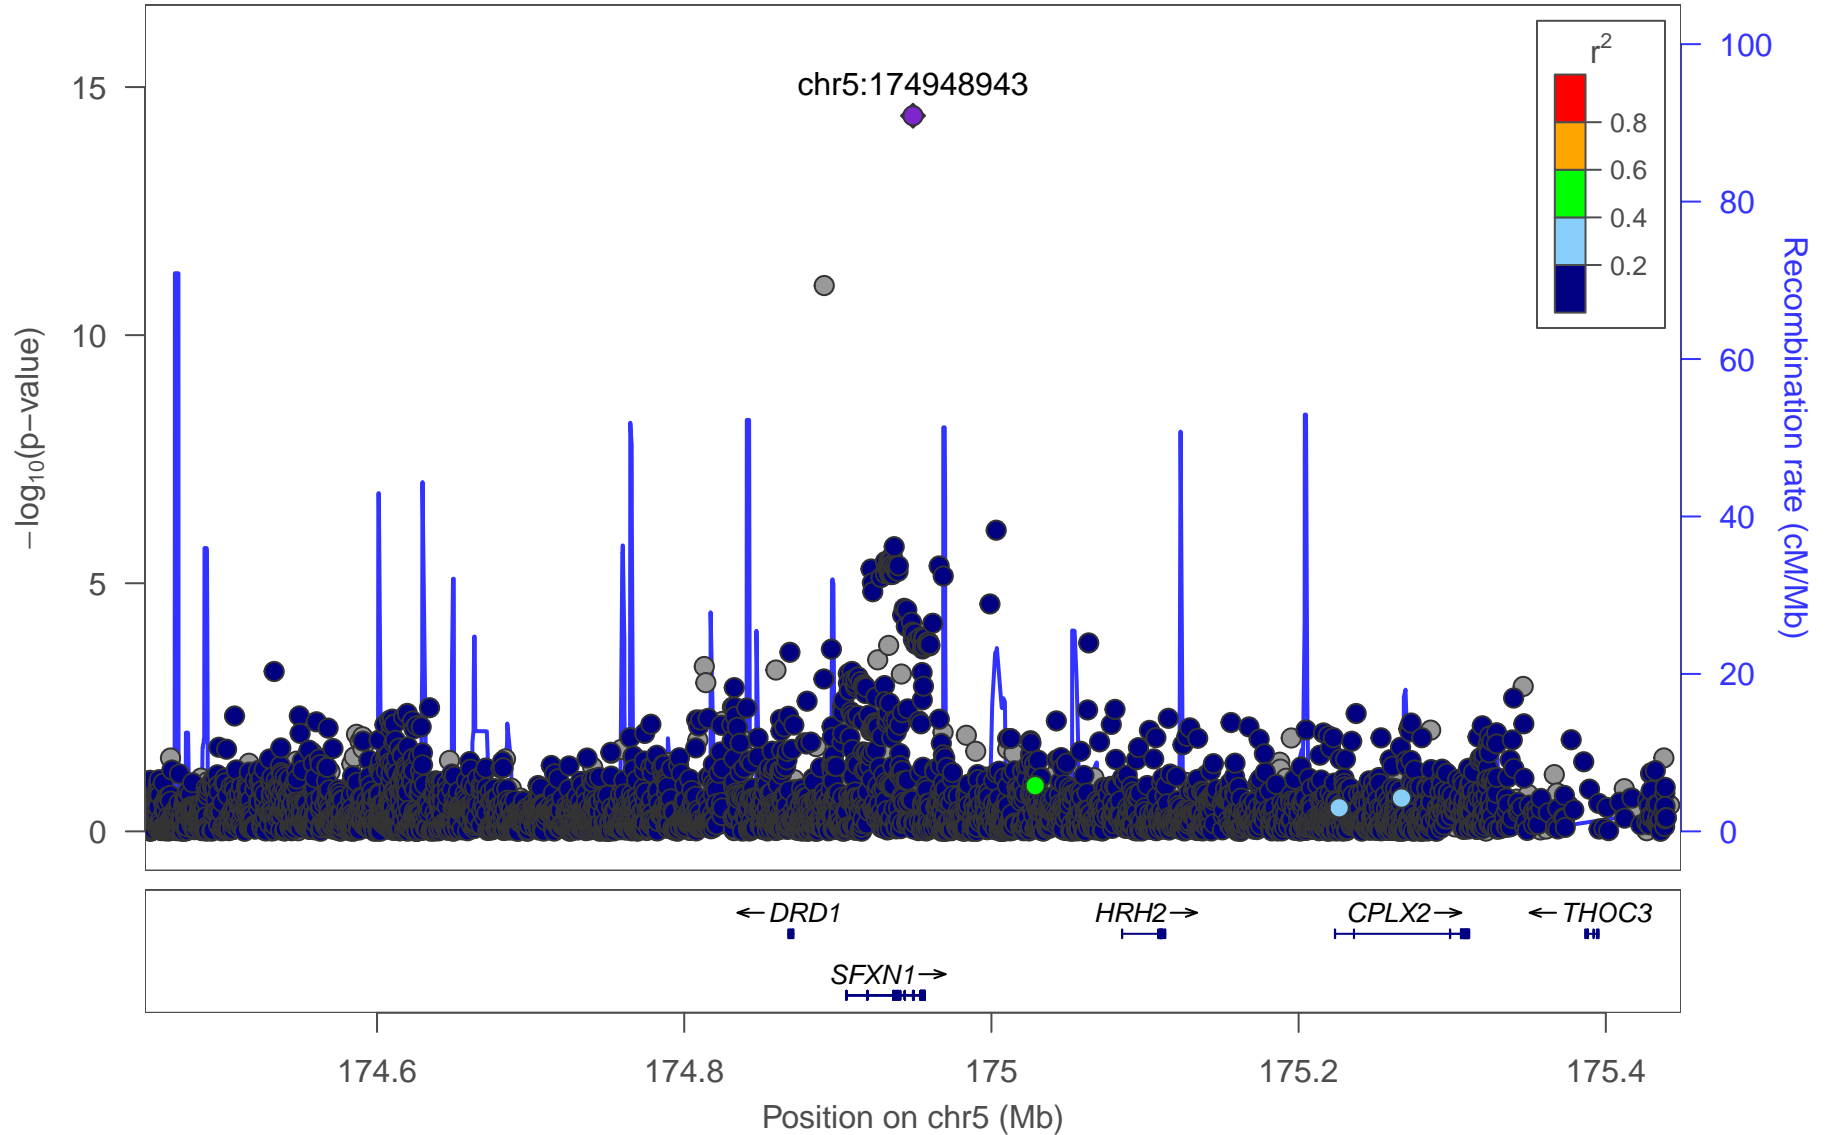

# 5\_16:Phe

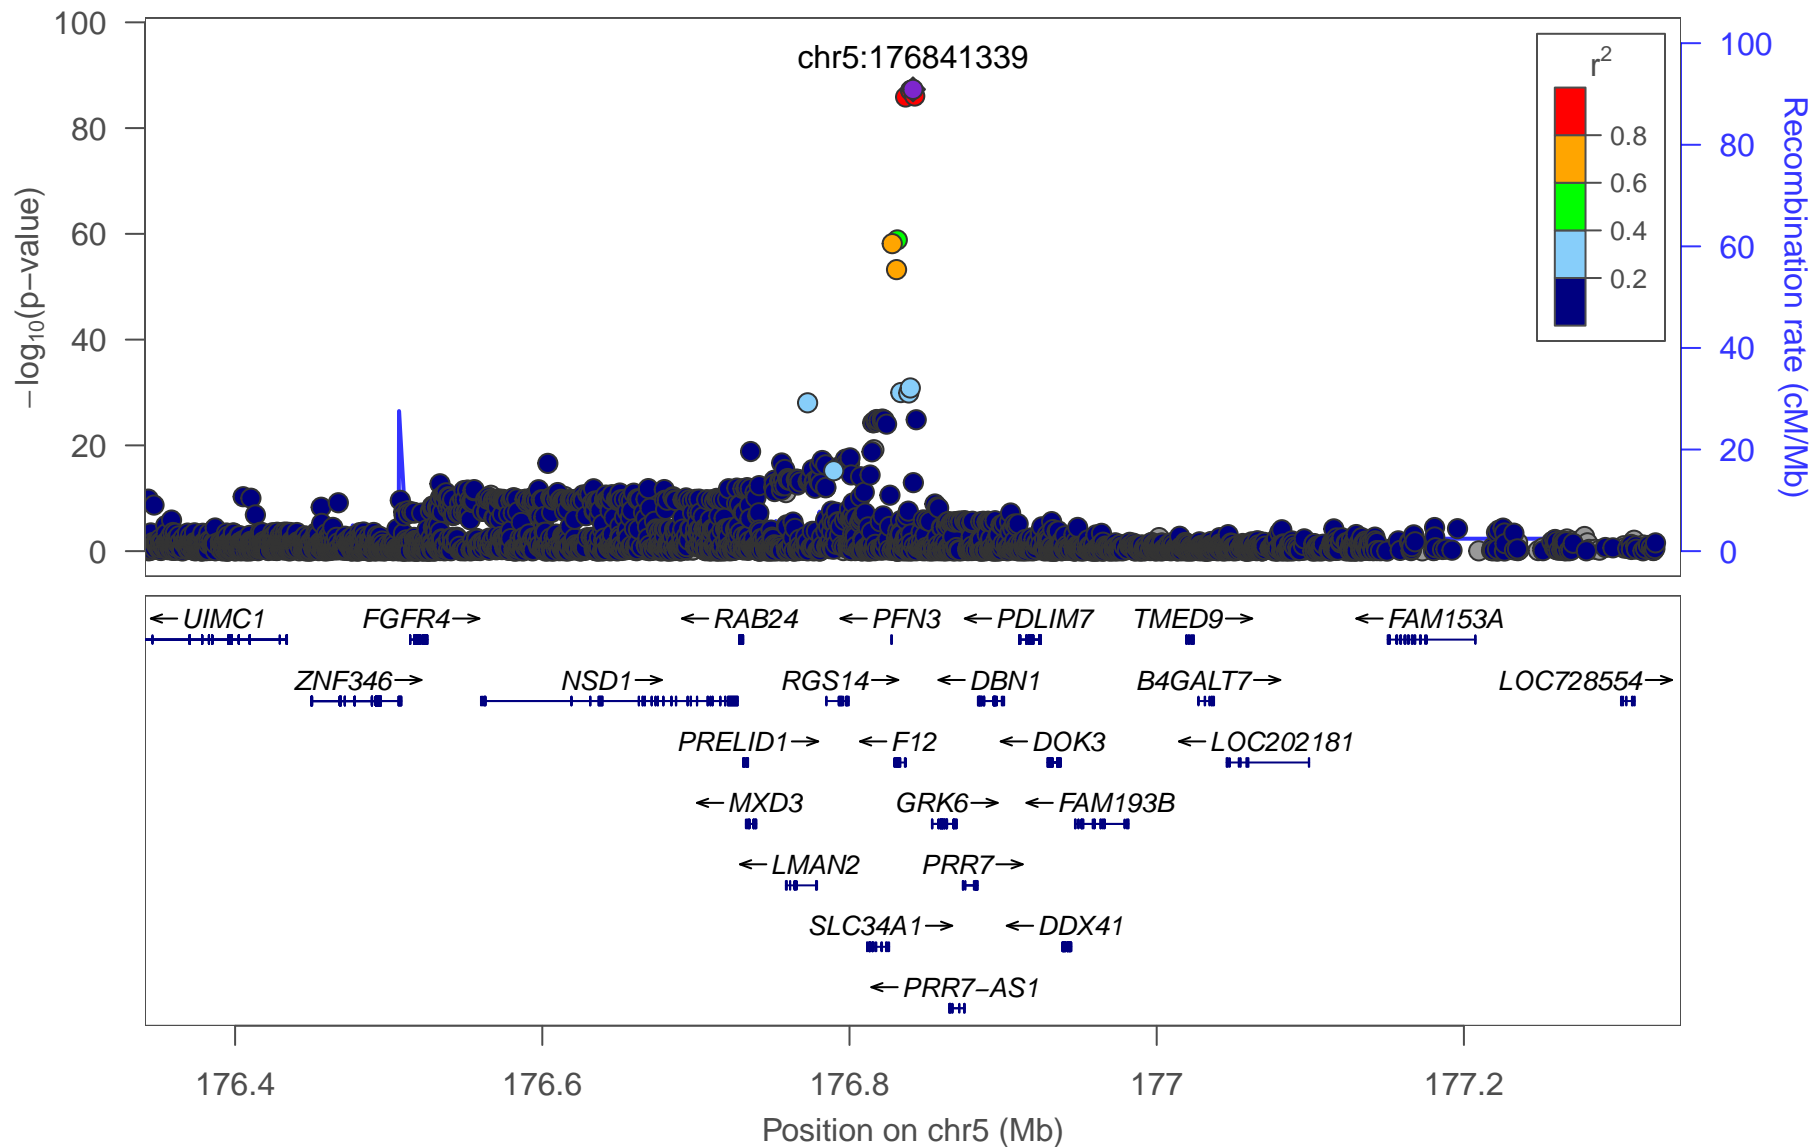

# 6\_1:XL-HDL-FC\_percent

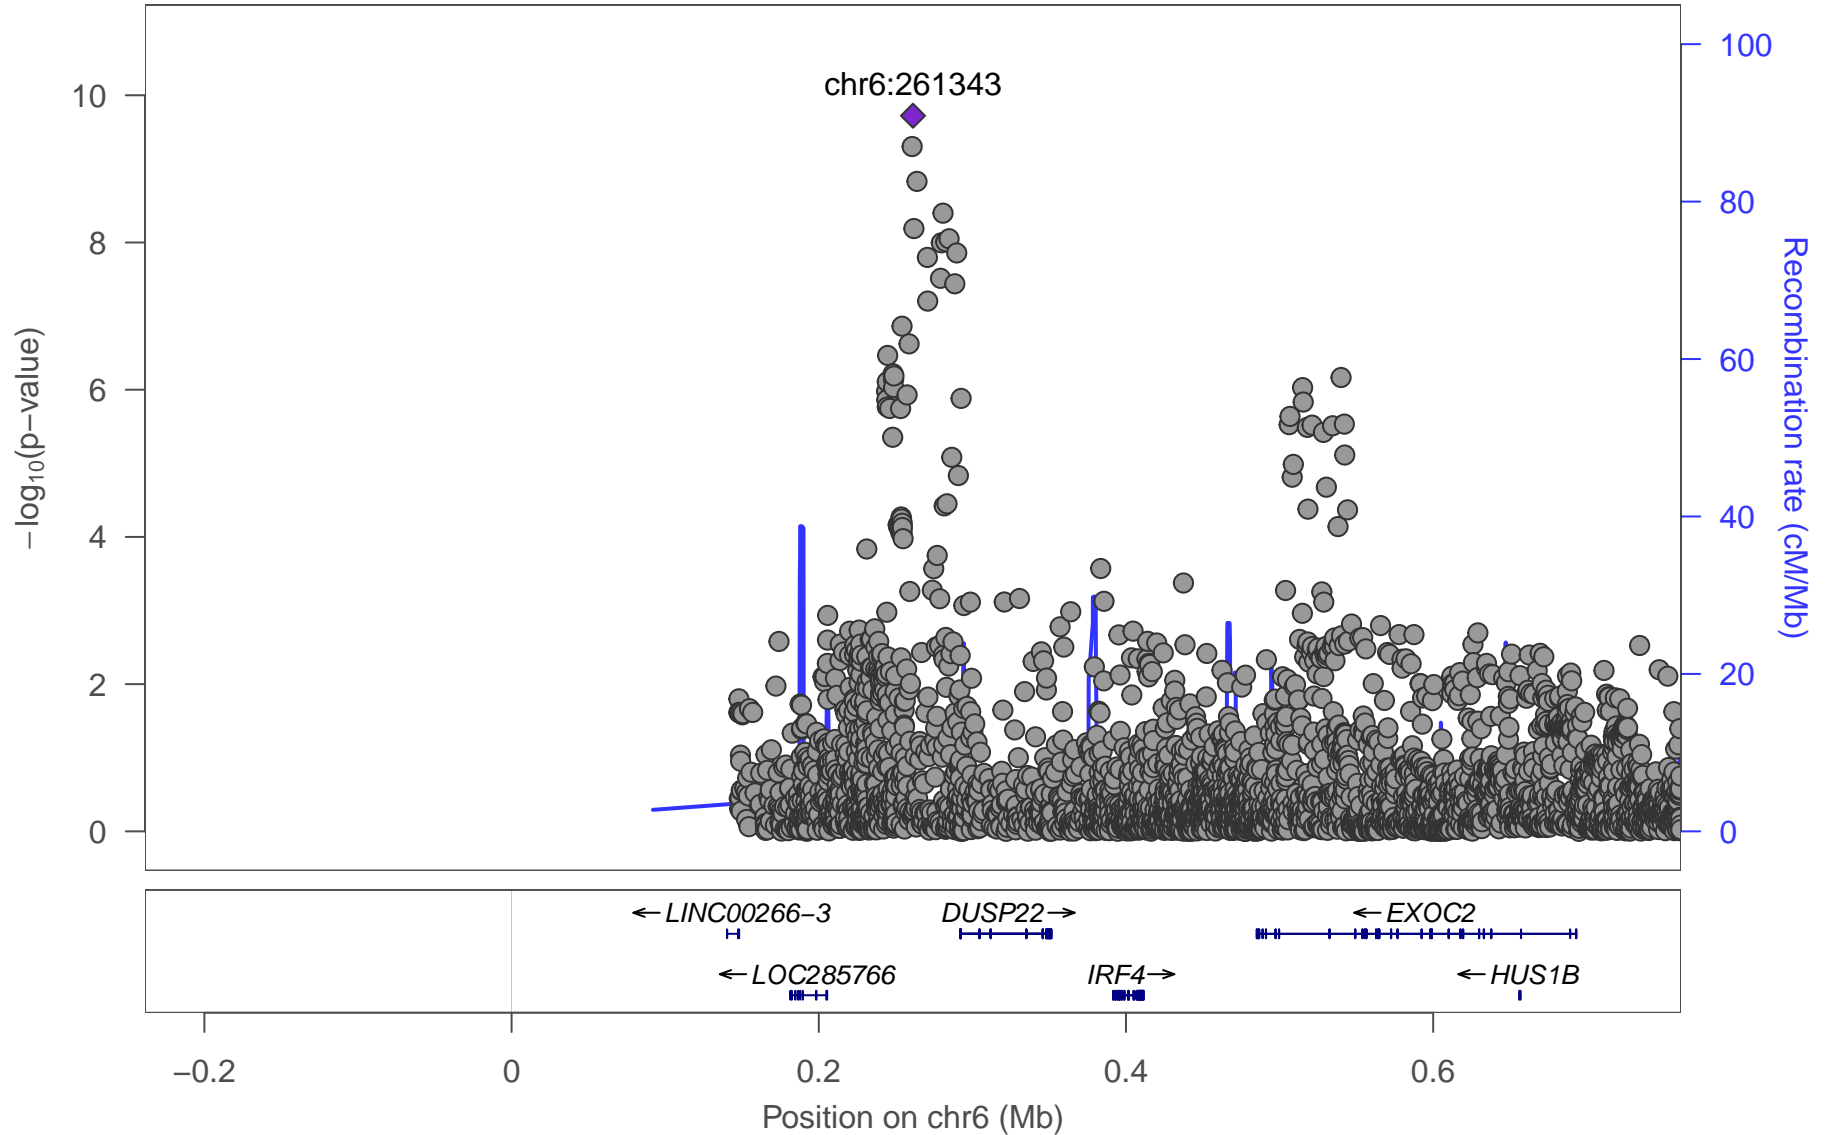

# 6\_2:Crea

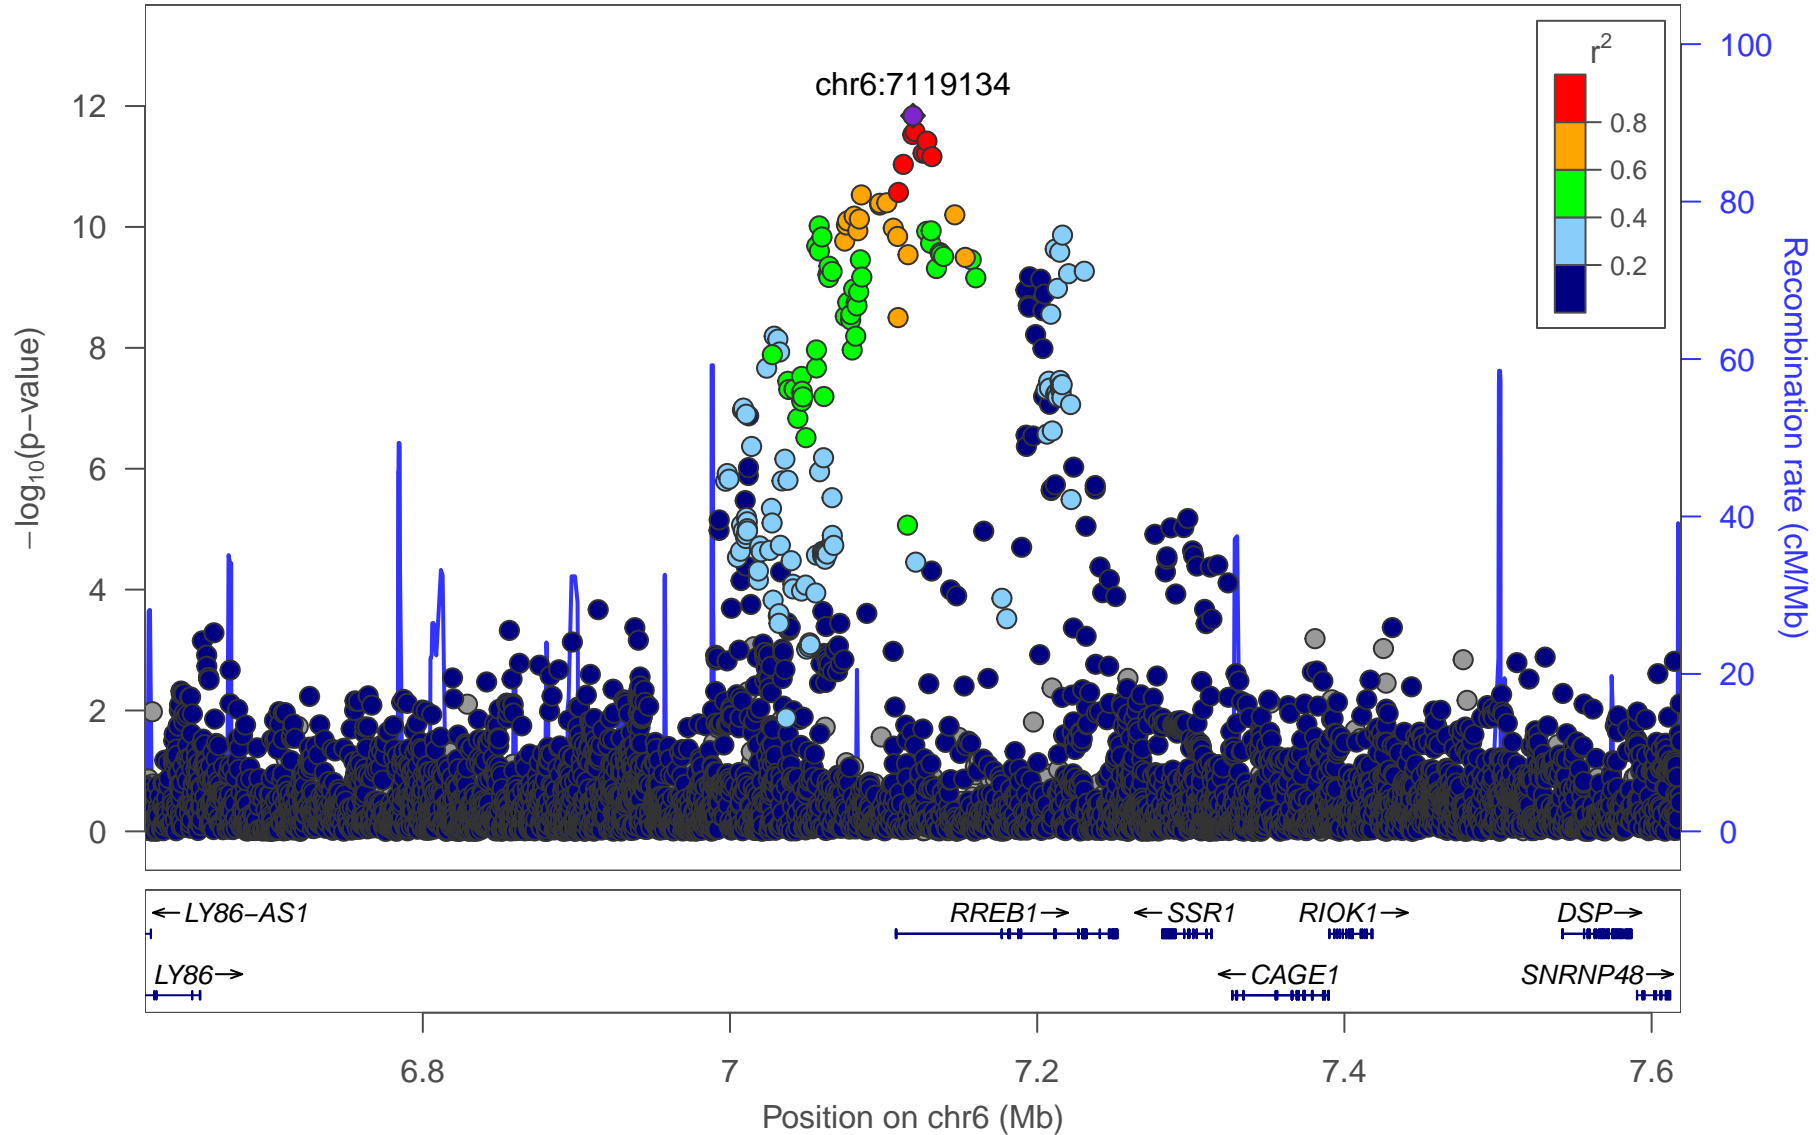

# 6\_3:DHAbyFA

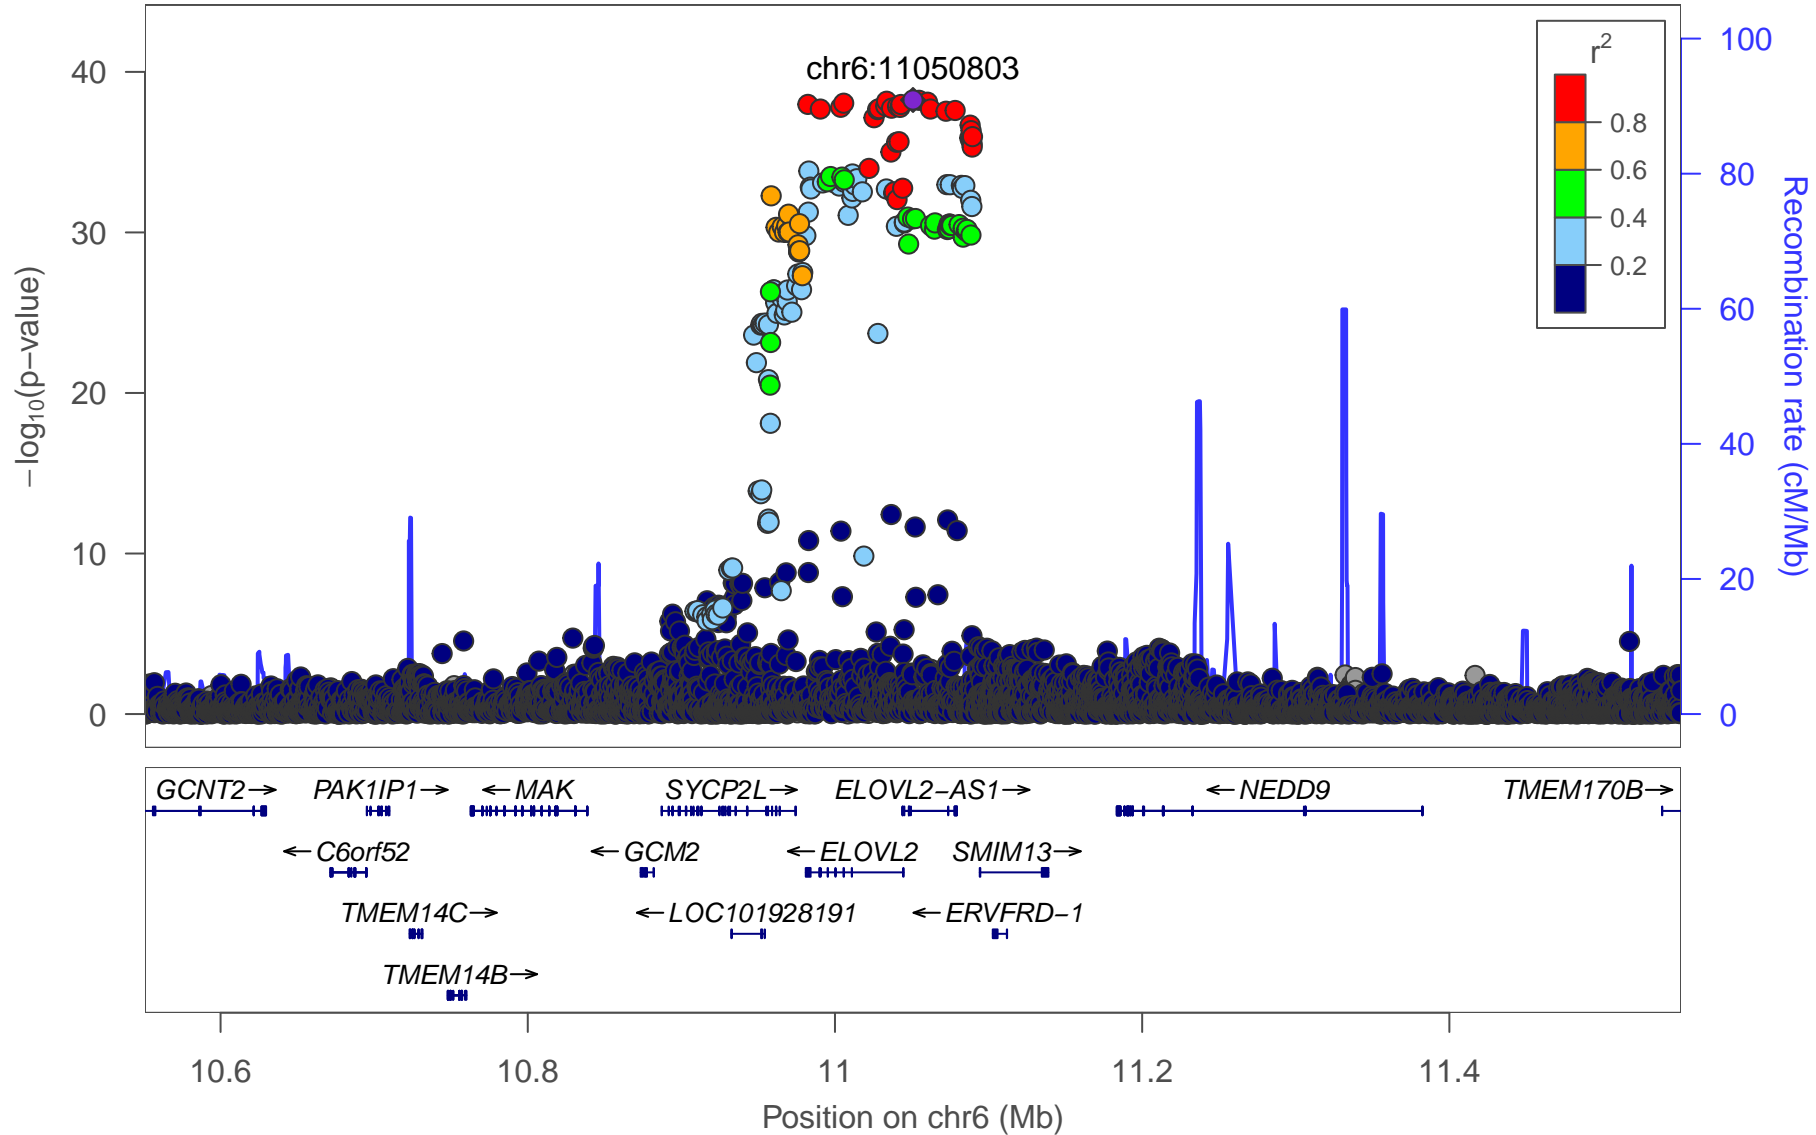



# 6\_4:L-LDL-PL\_percent

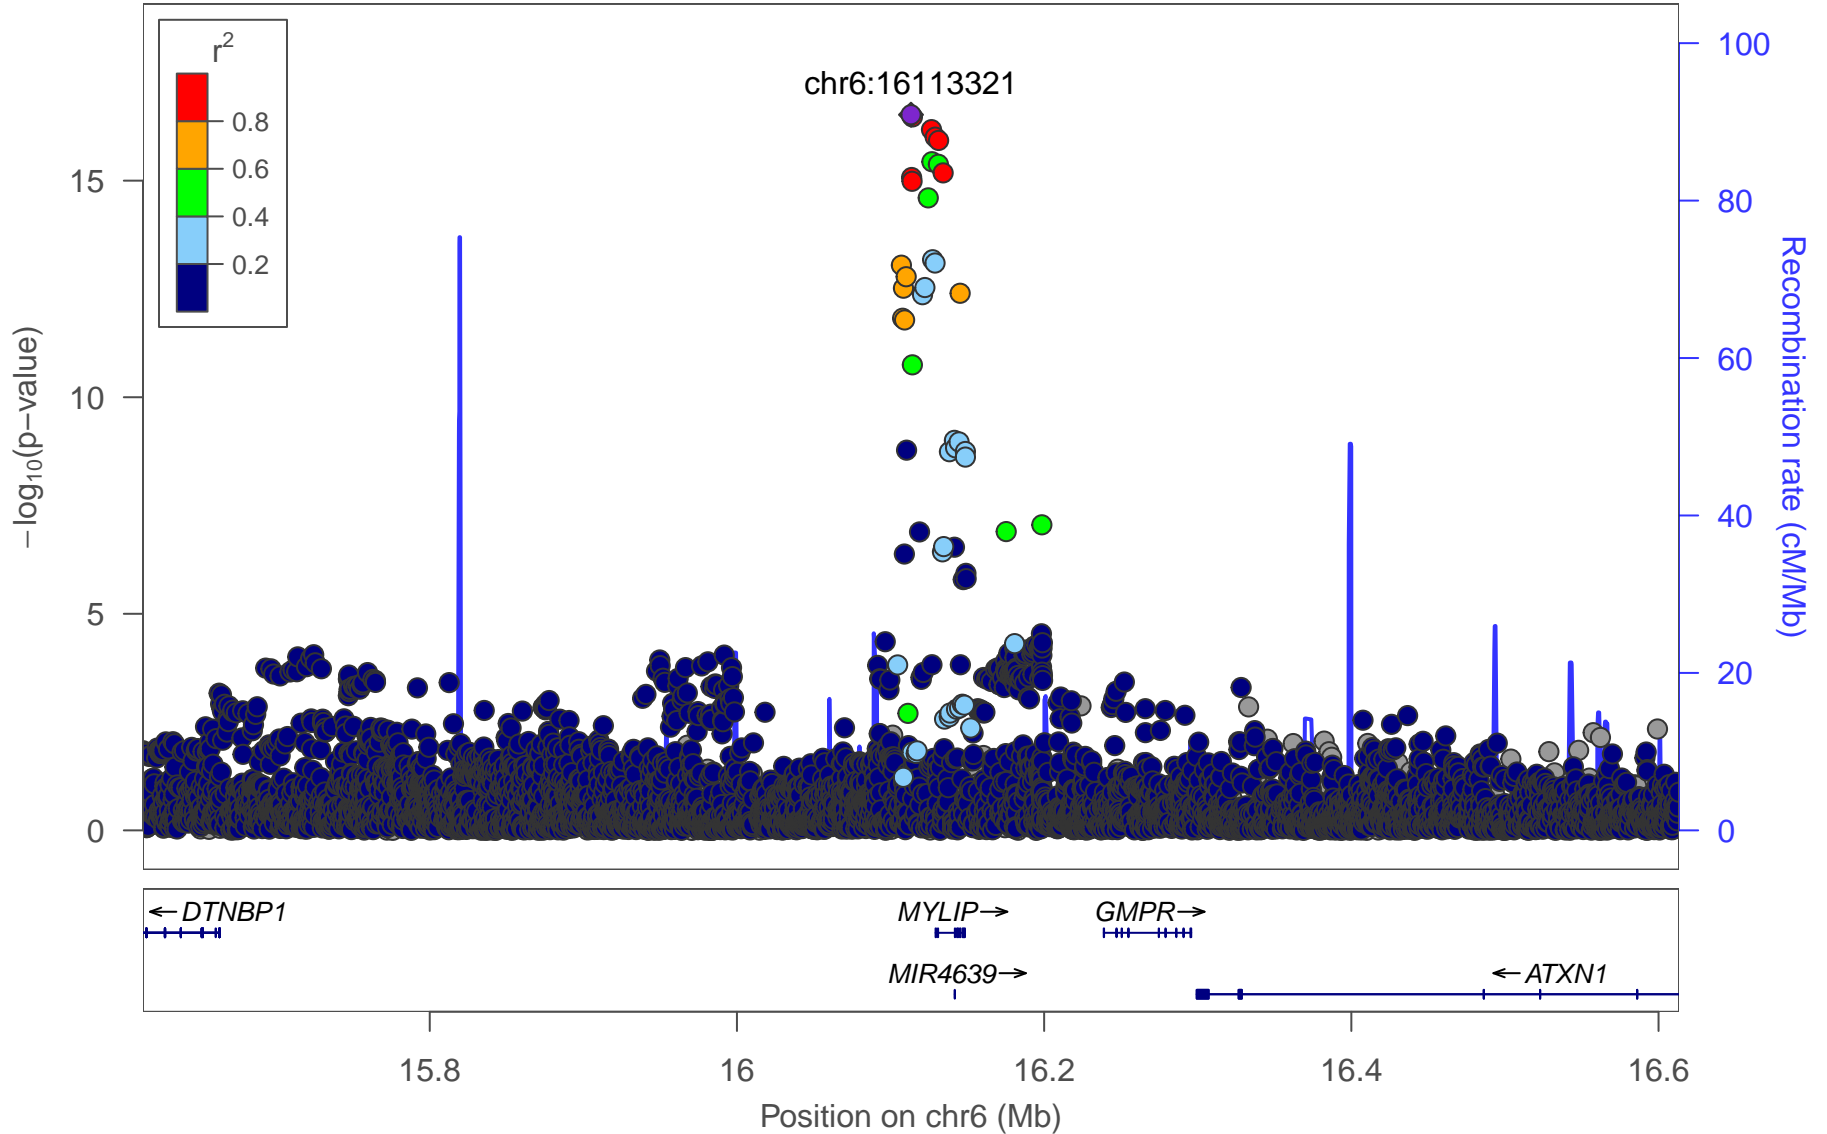

# 6\_5:Ala

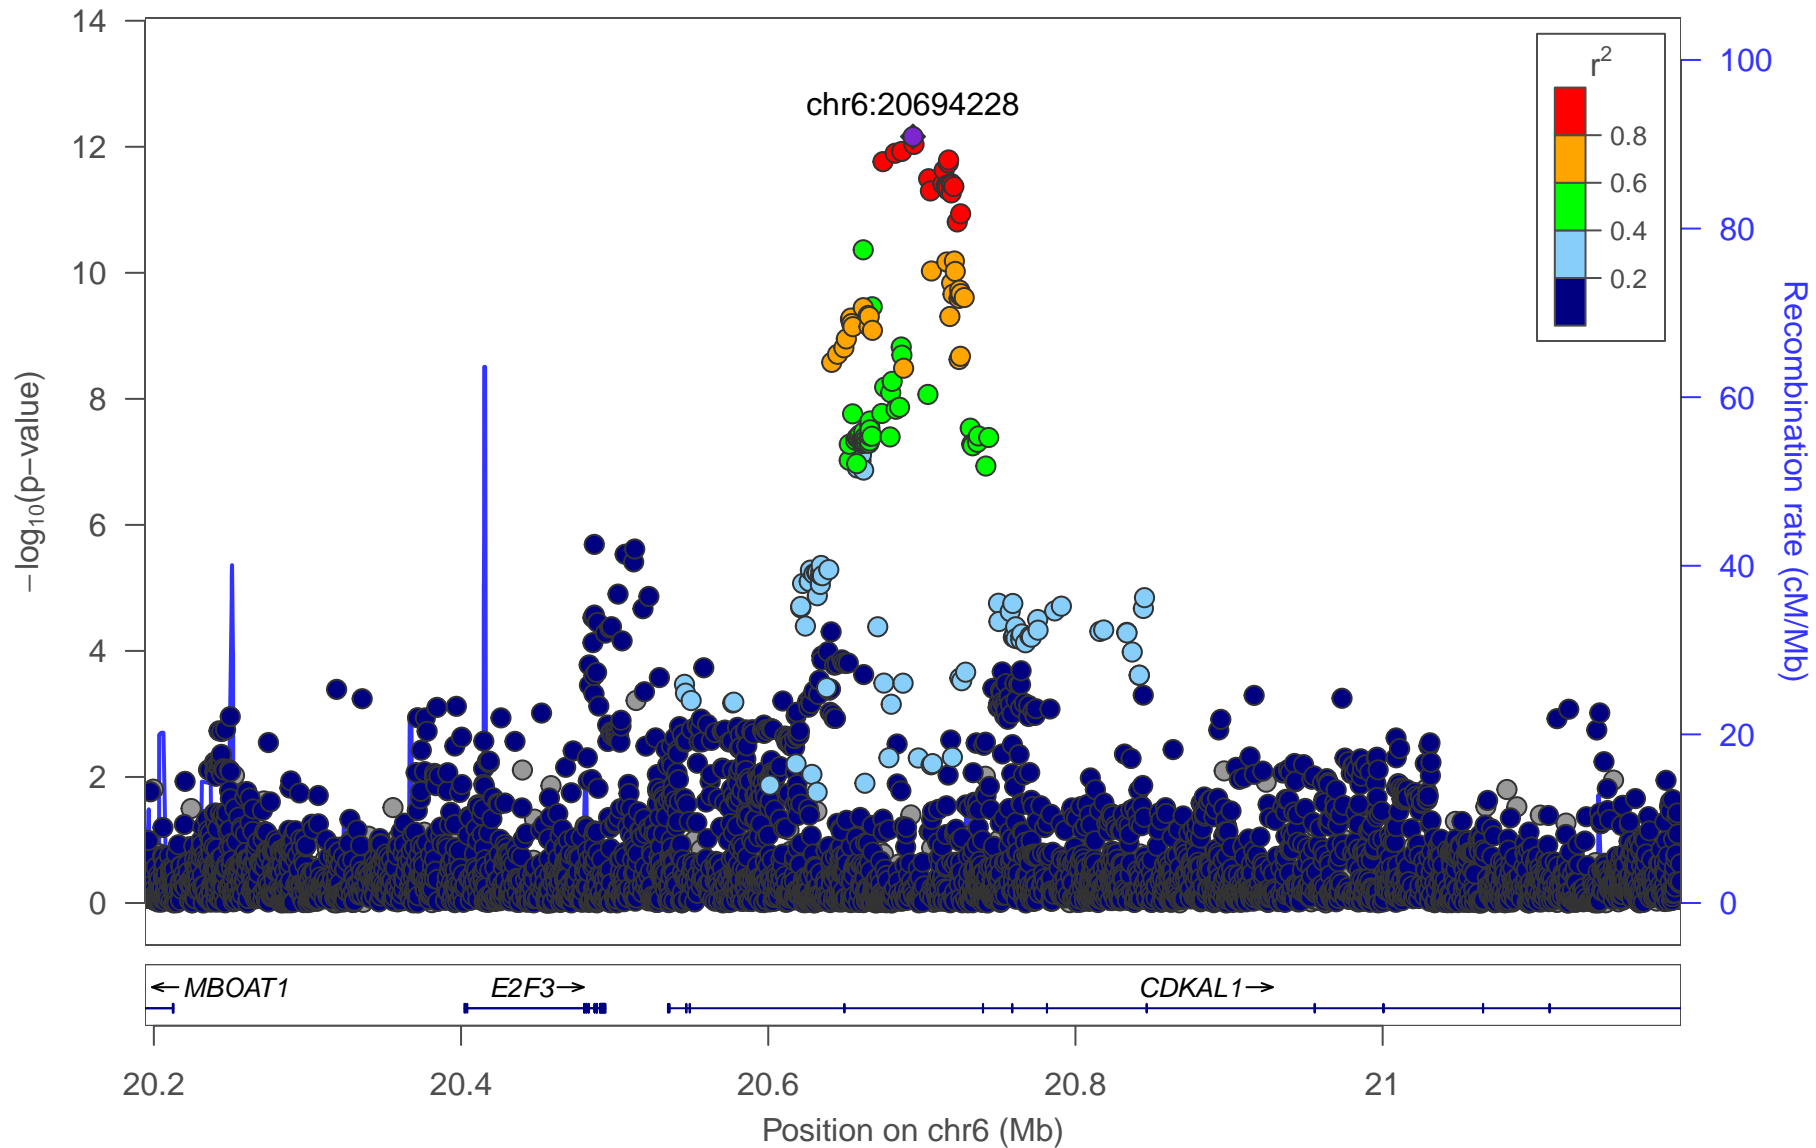

# 6\_6:SFAbbyFA

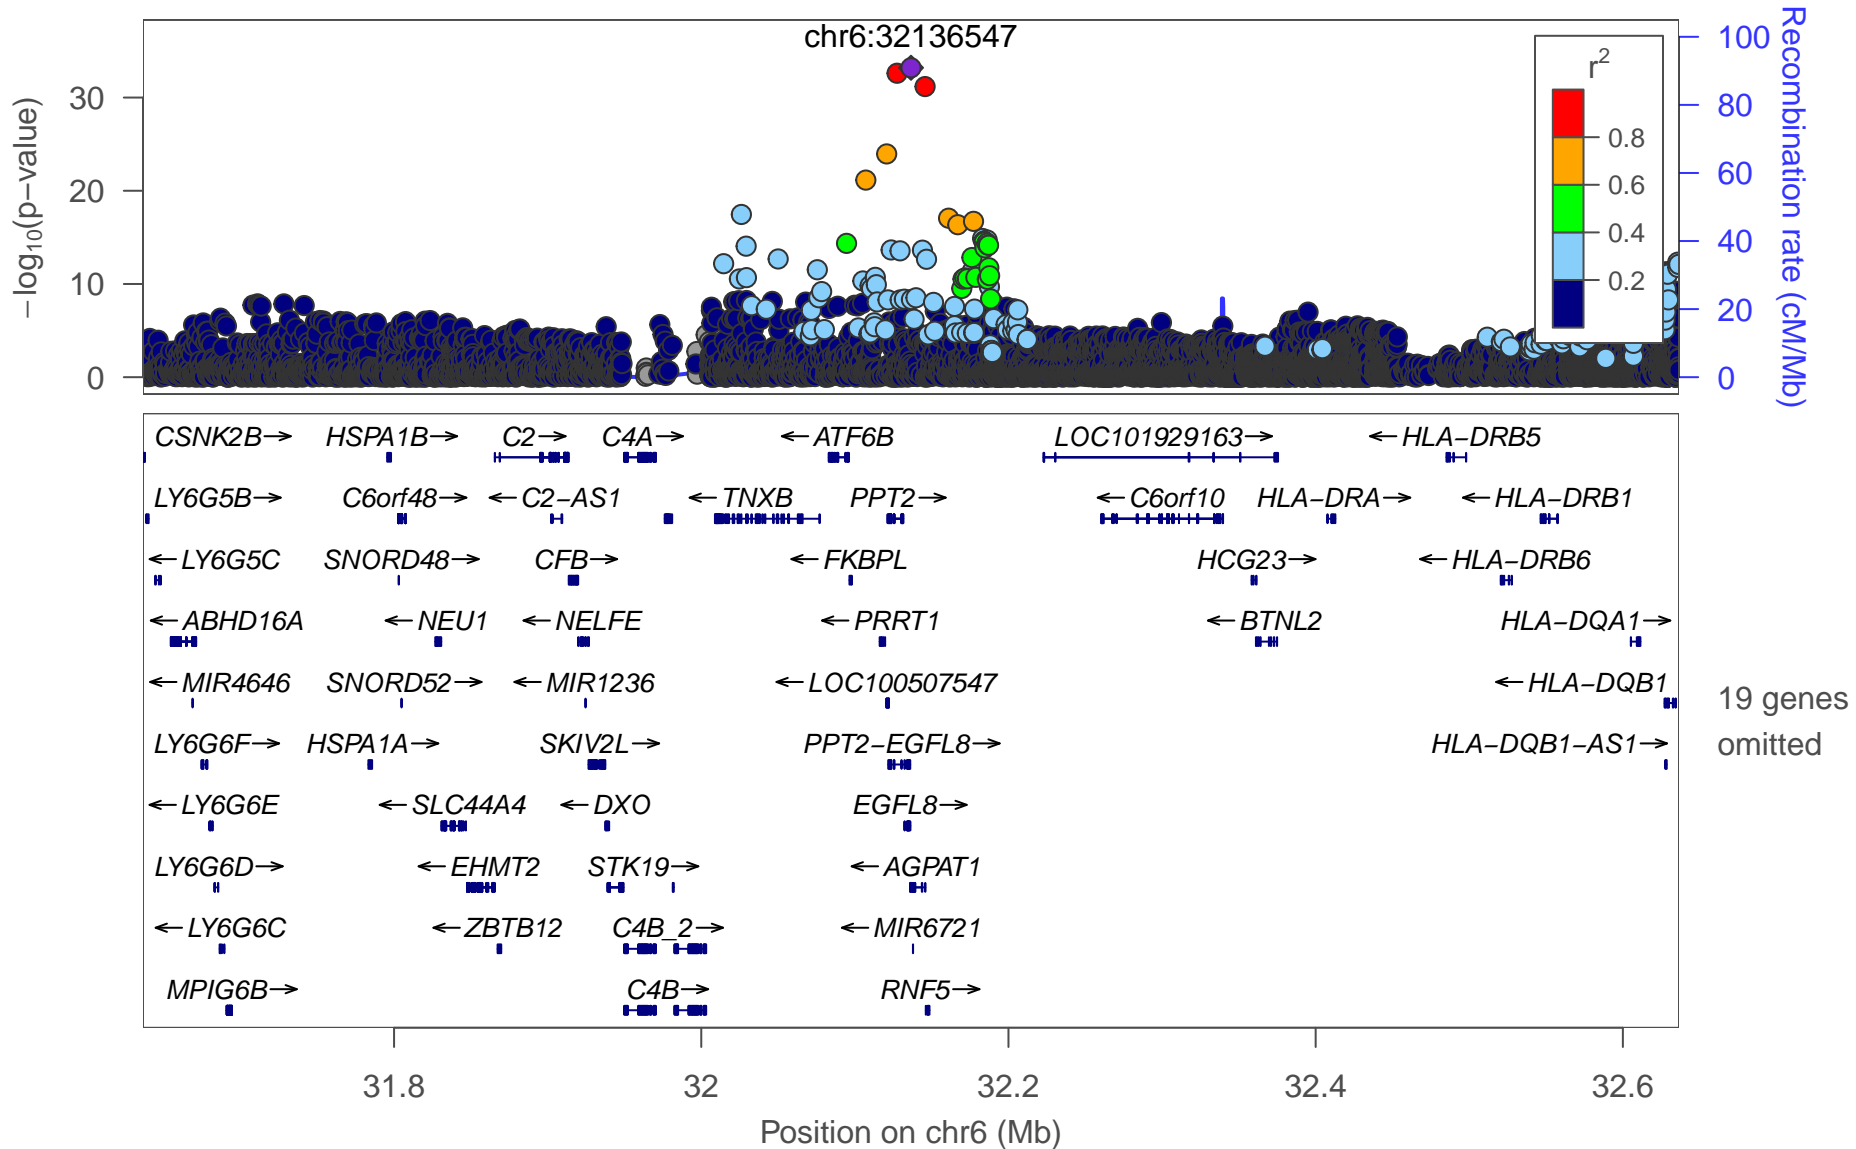

# 6\_7:ApoA1

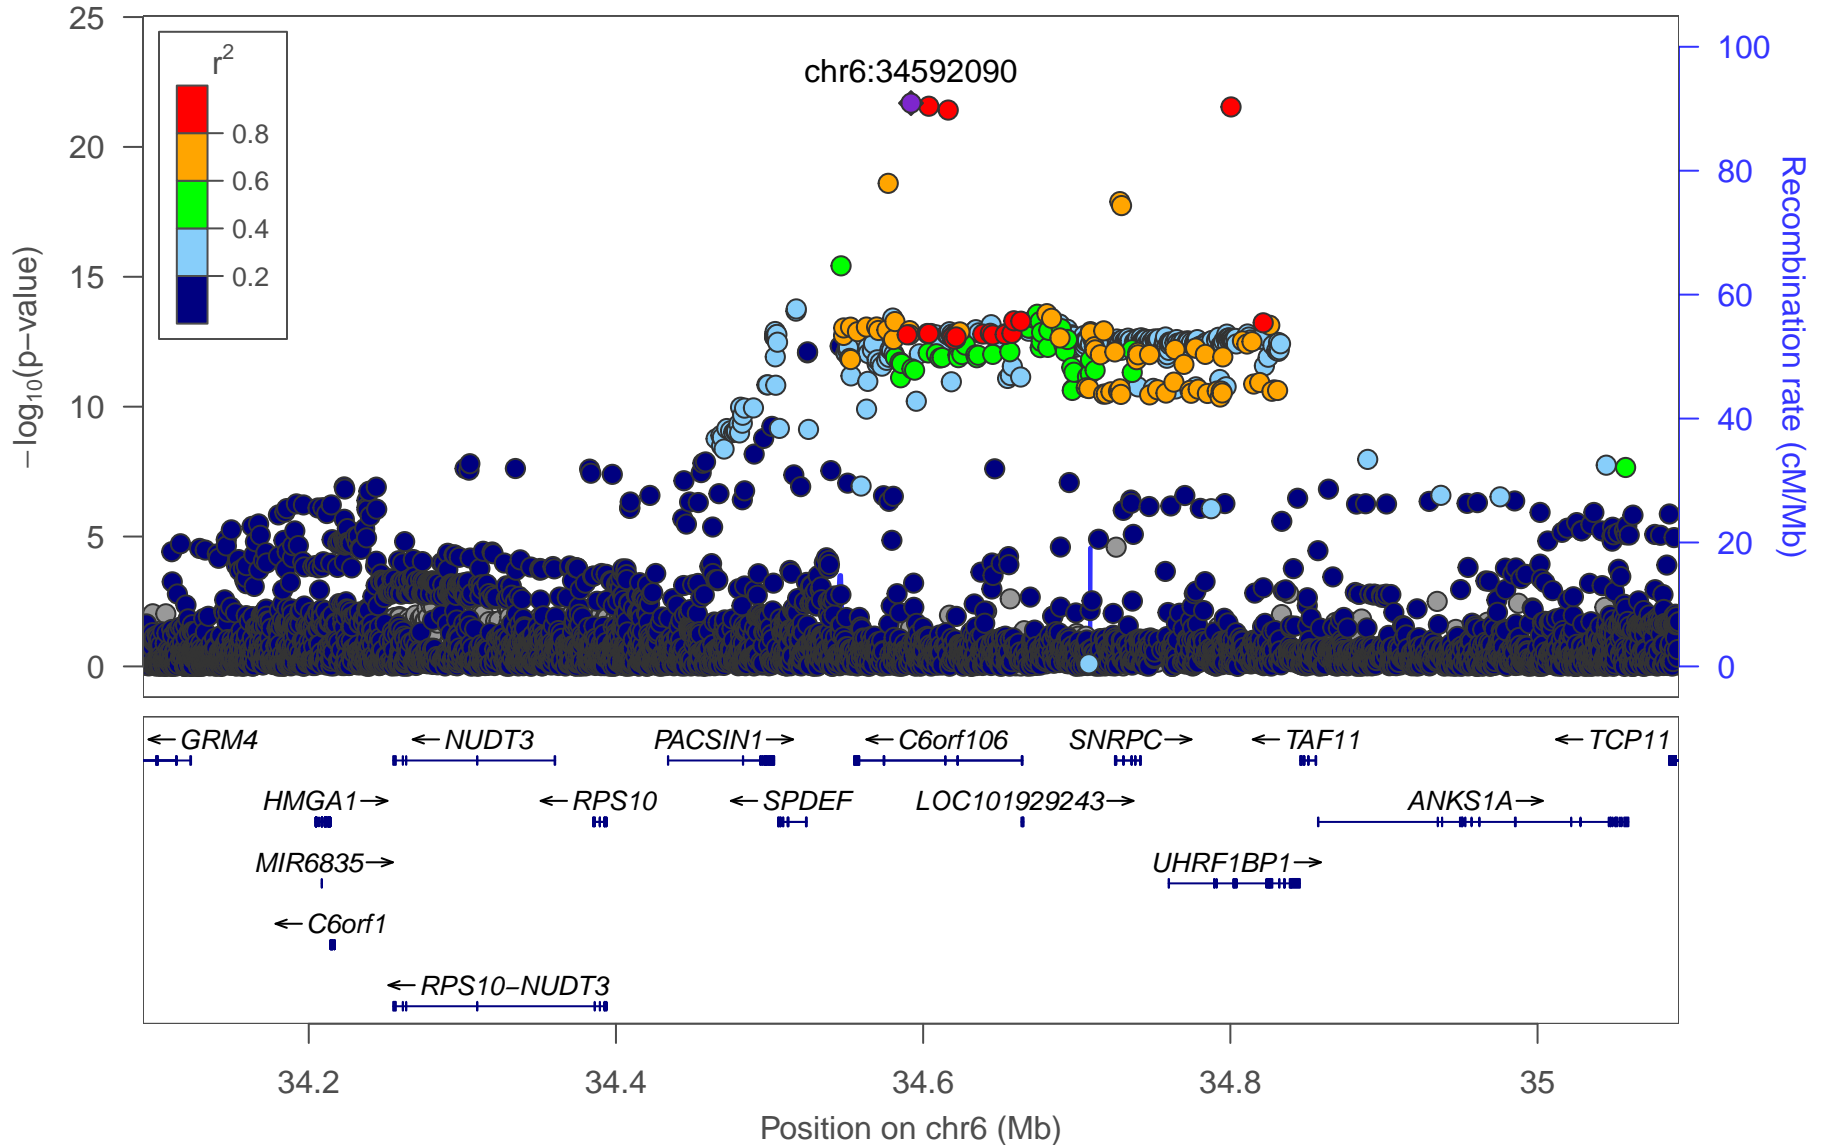

# 6\_8:Gln

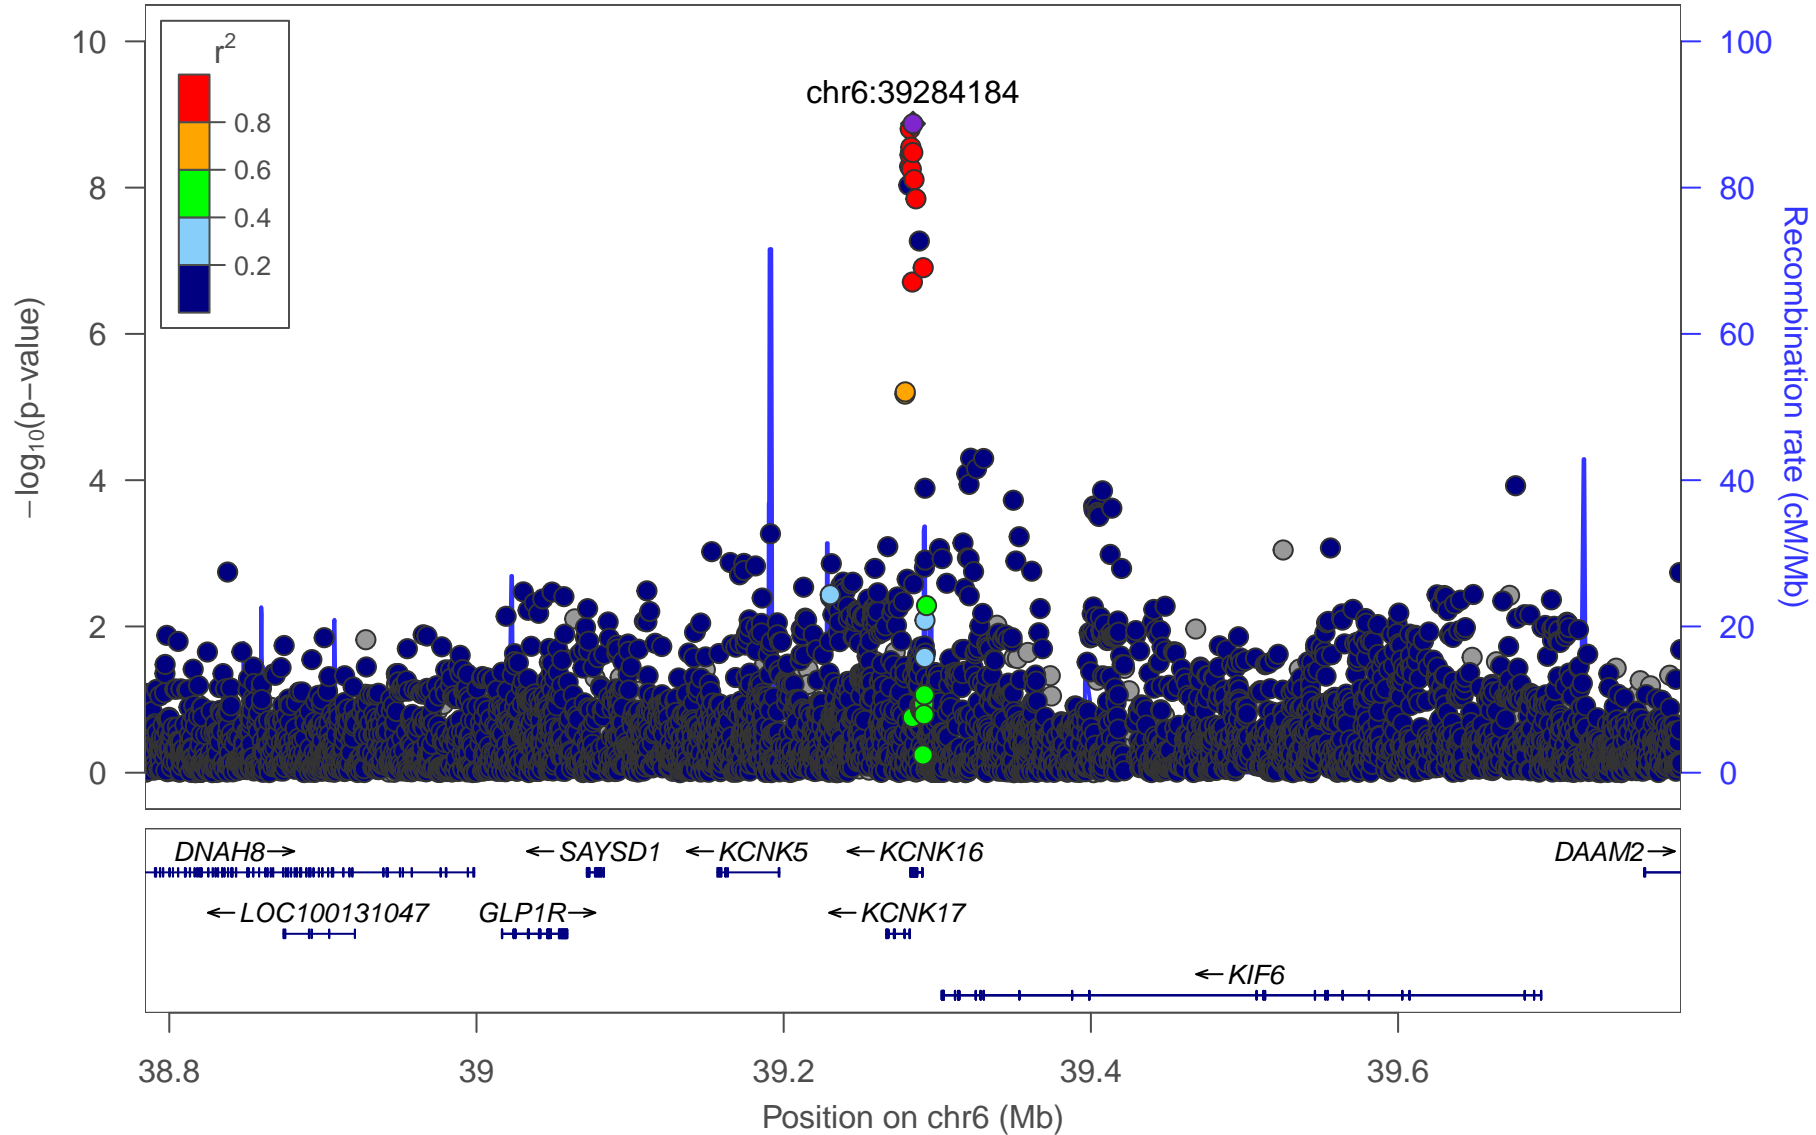

# 6\_9:XL-HDL-CE\_percent

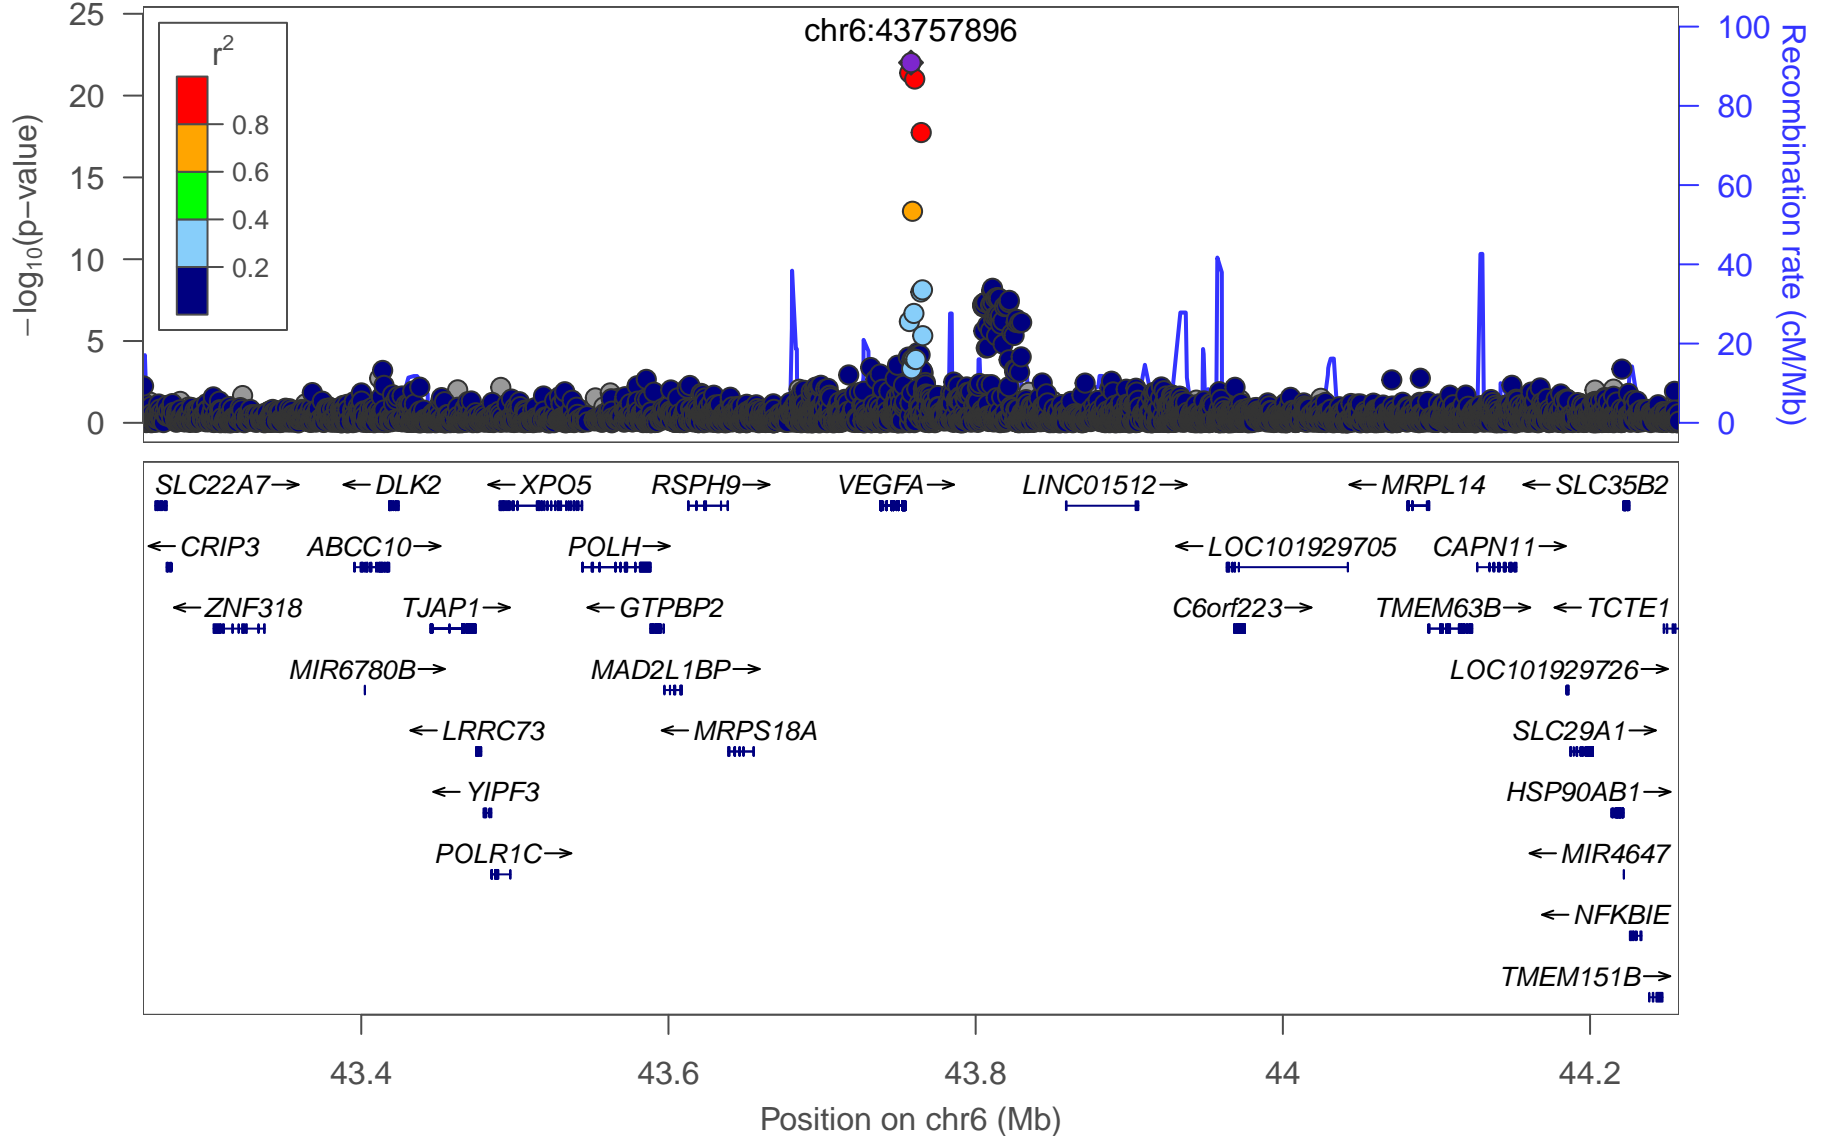

# 6\_10:Phe

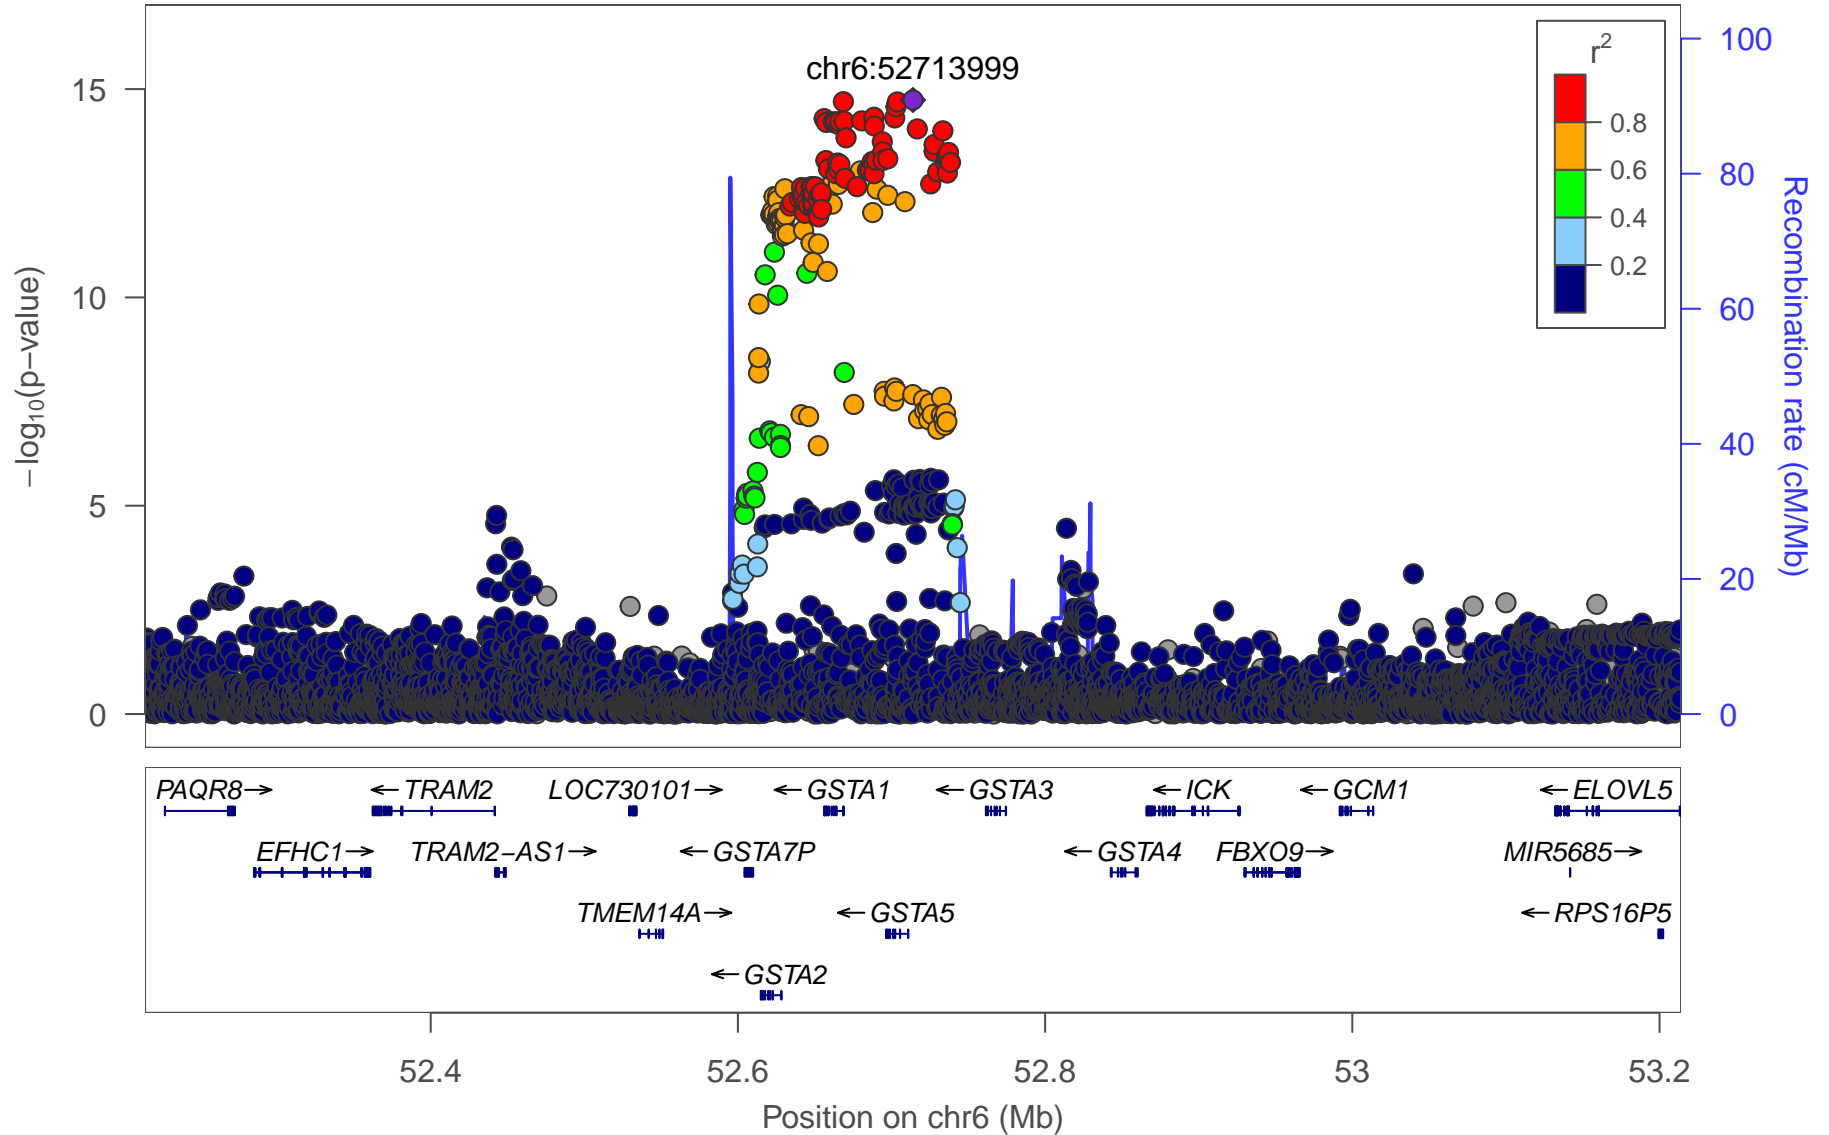

# 6\_11:TotFA

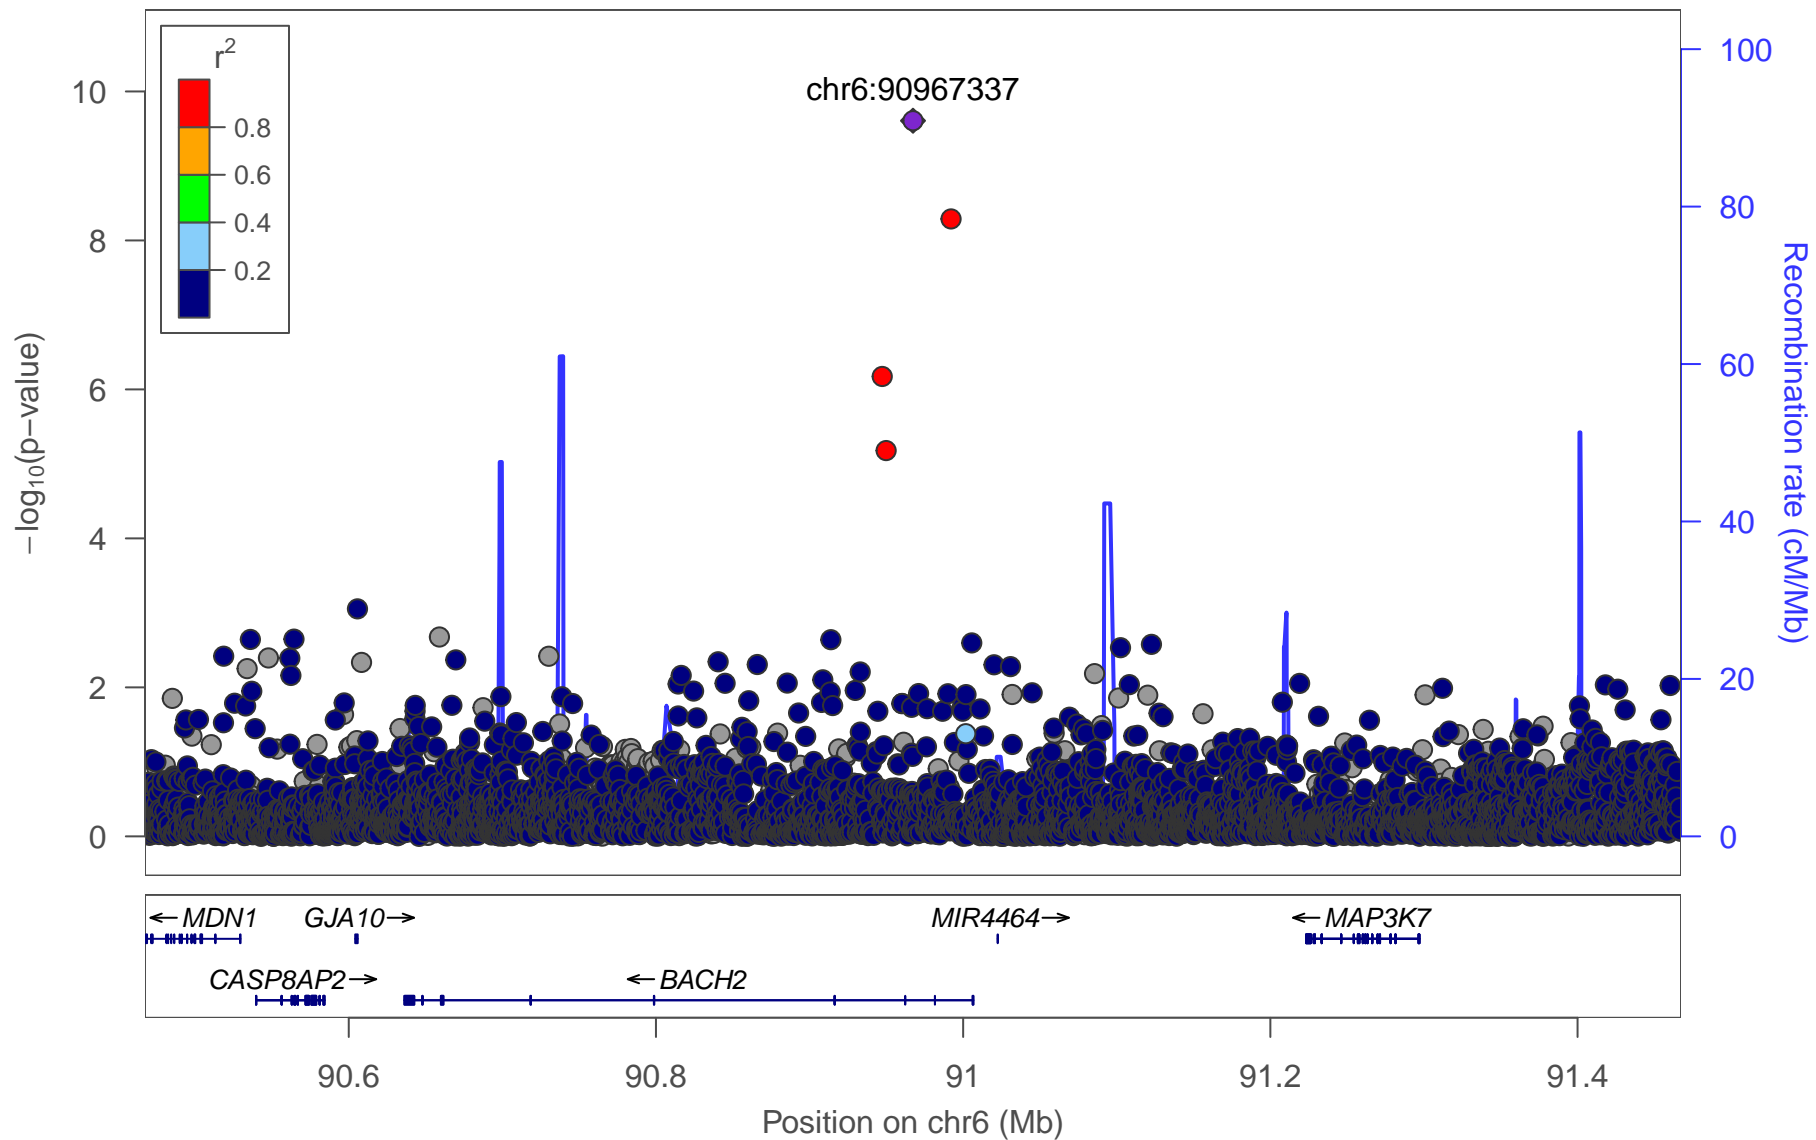



# 6\_12:L-LDL-PL\_percent

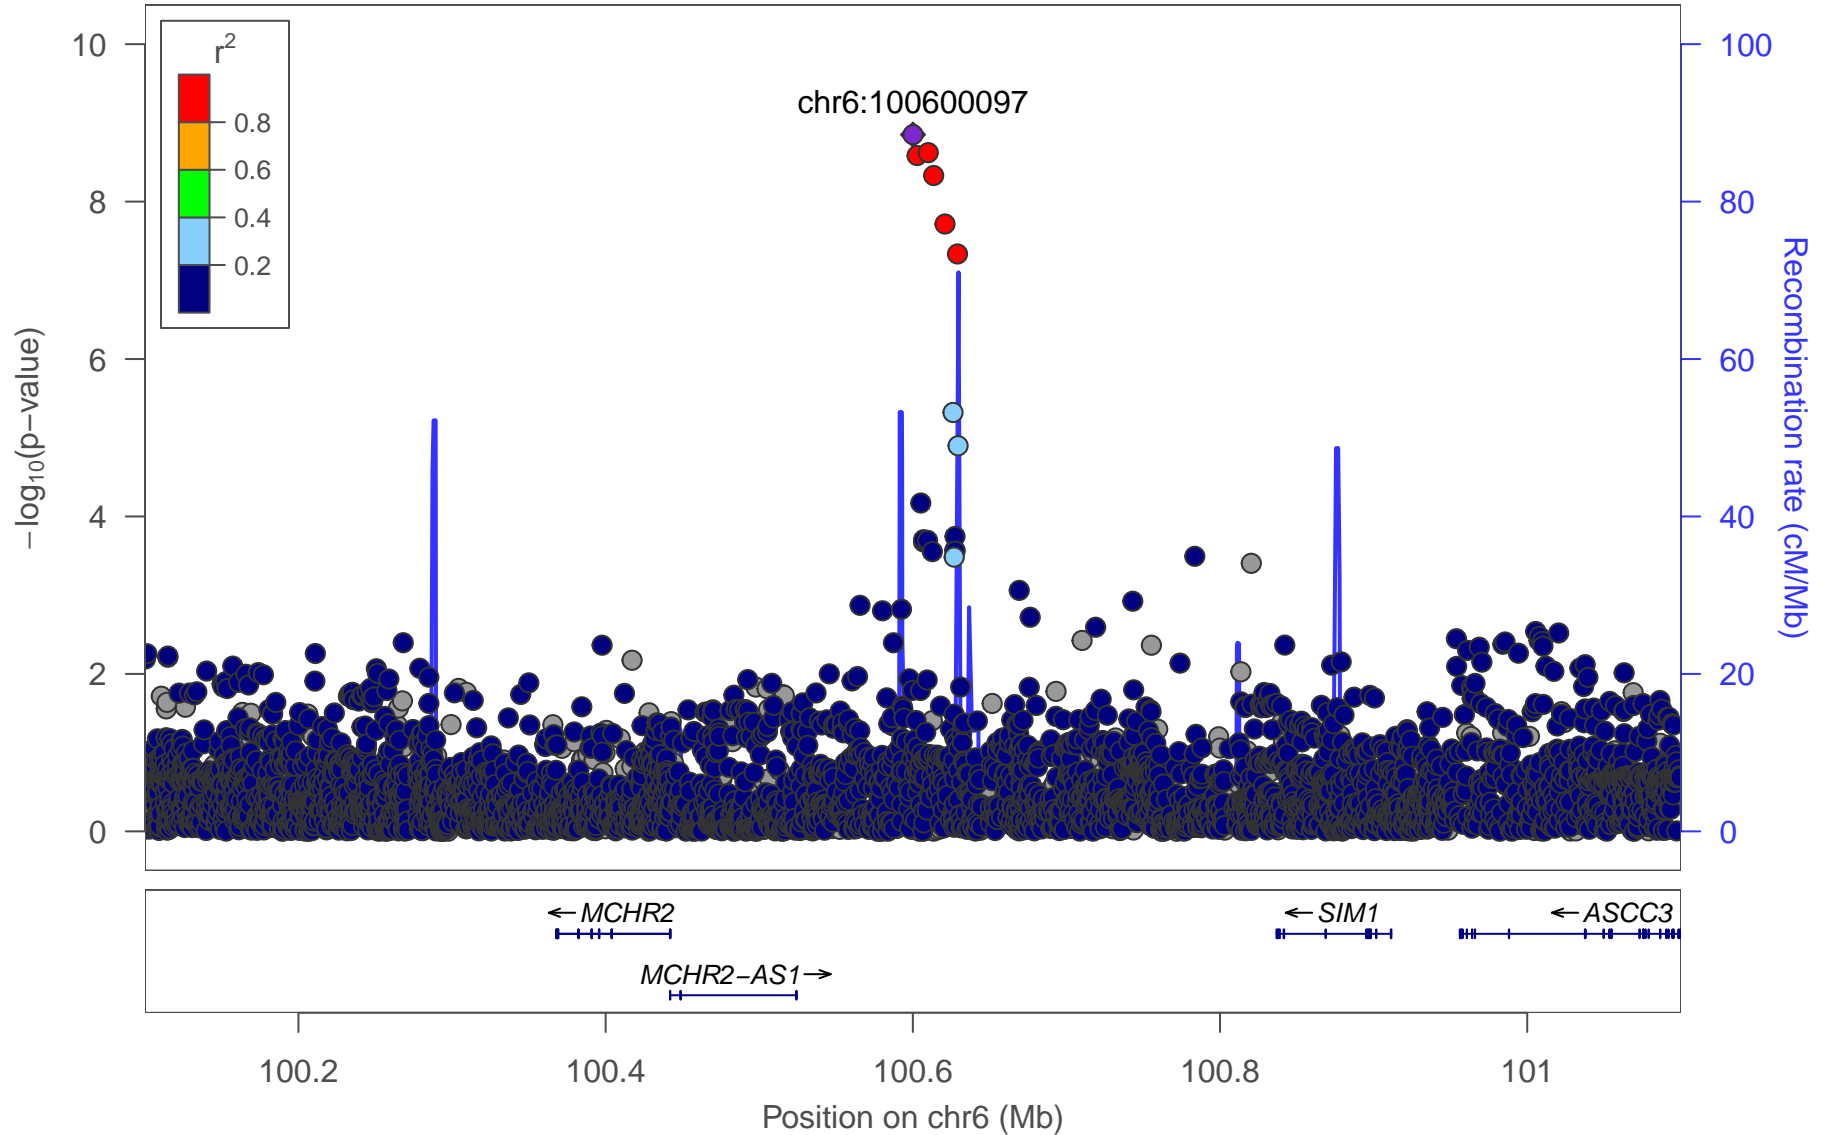

# 6\_13:Tyr

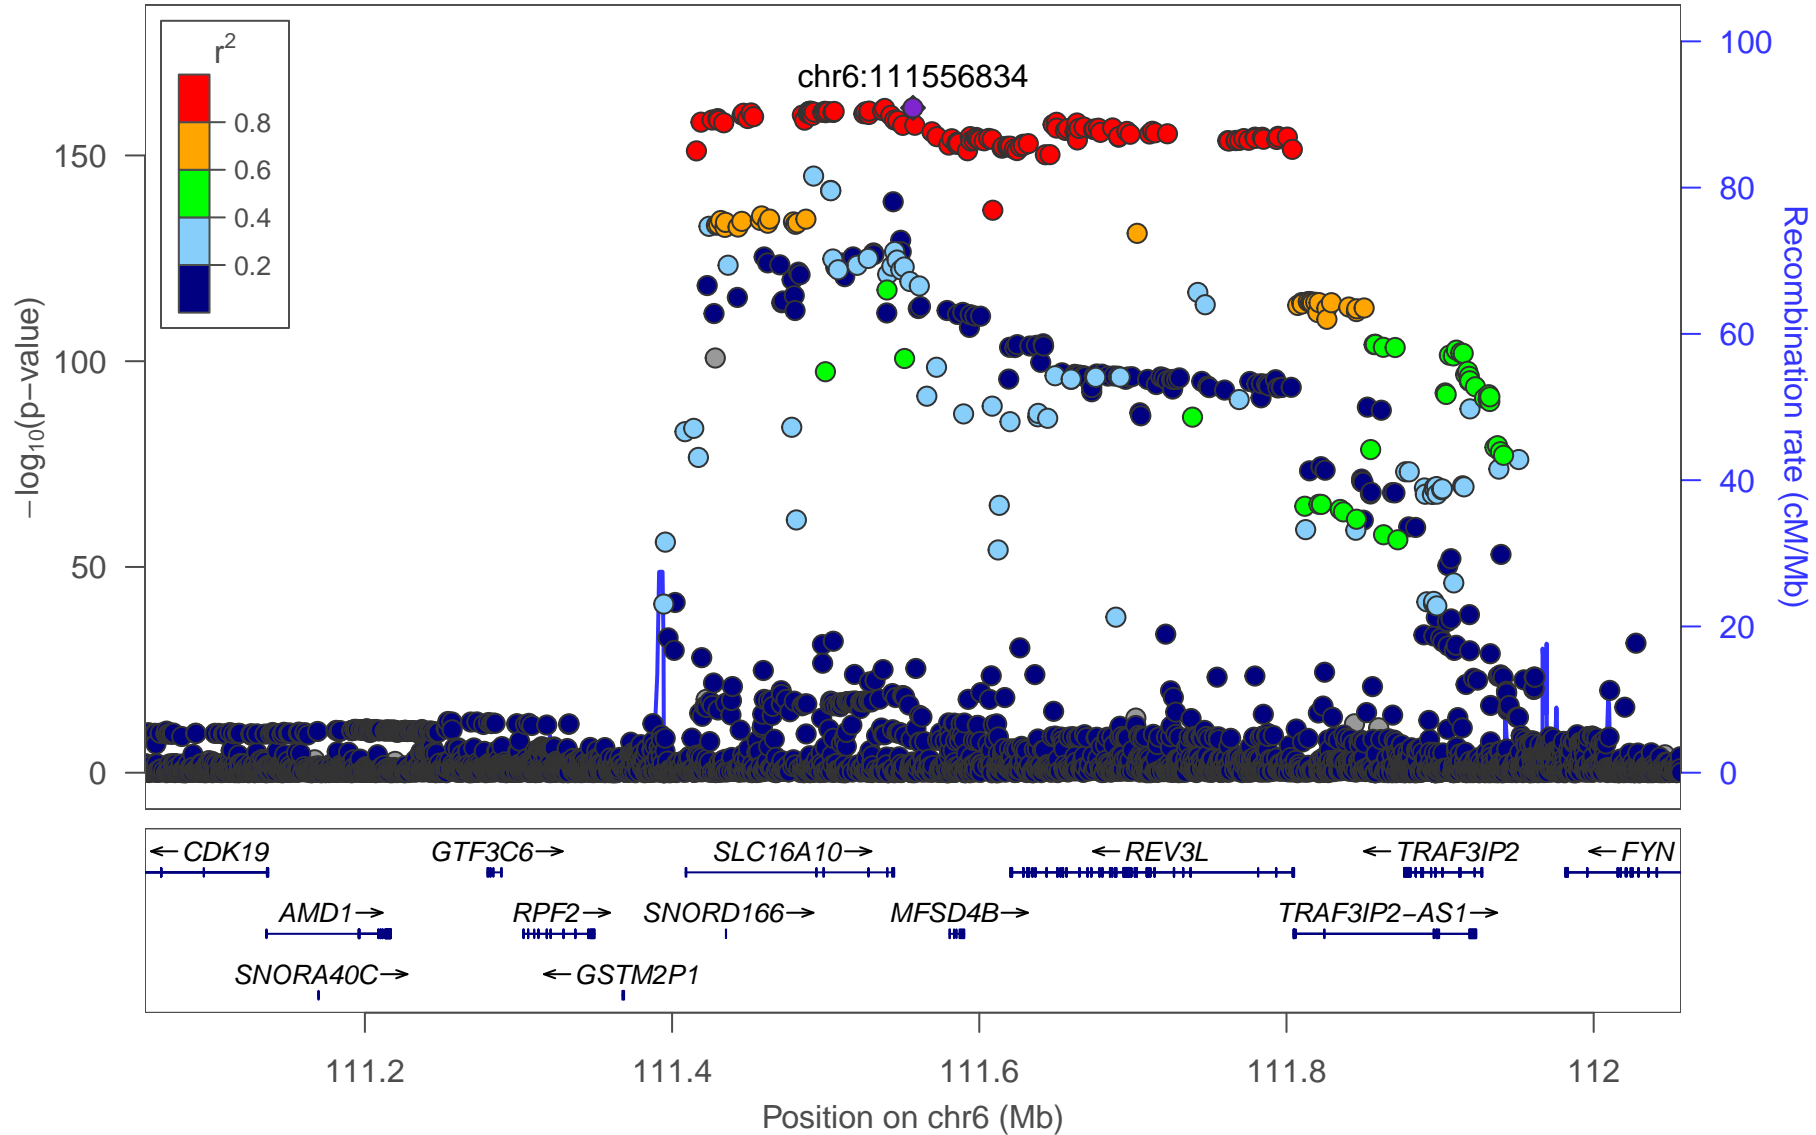

# 6\_14:FAw6

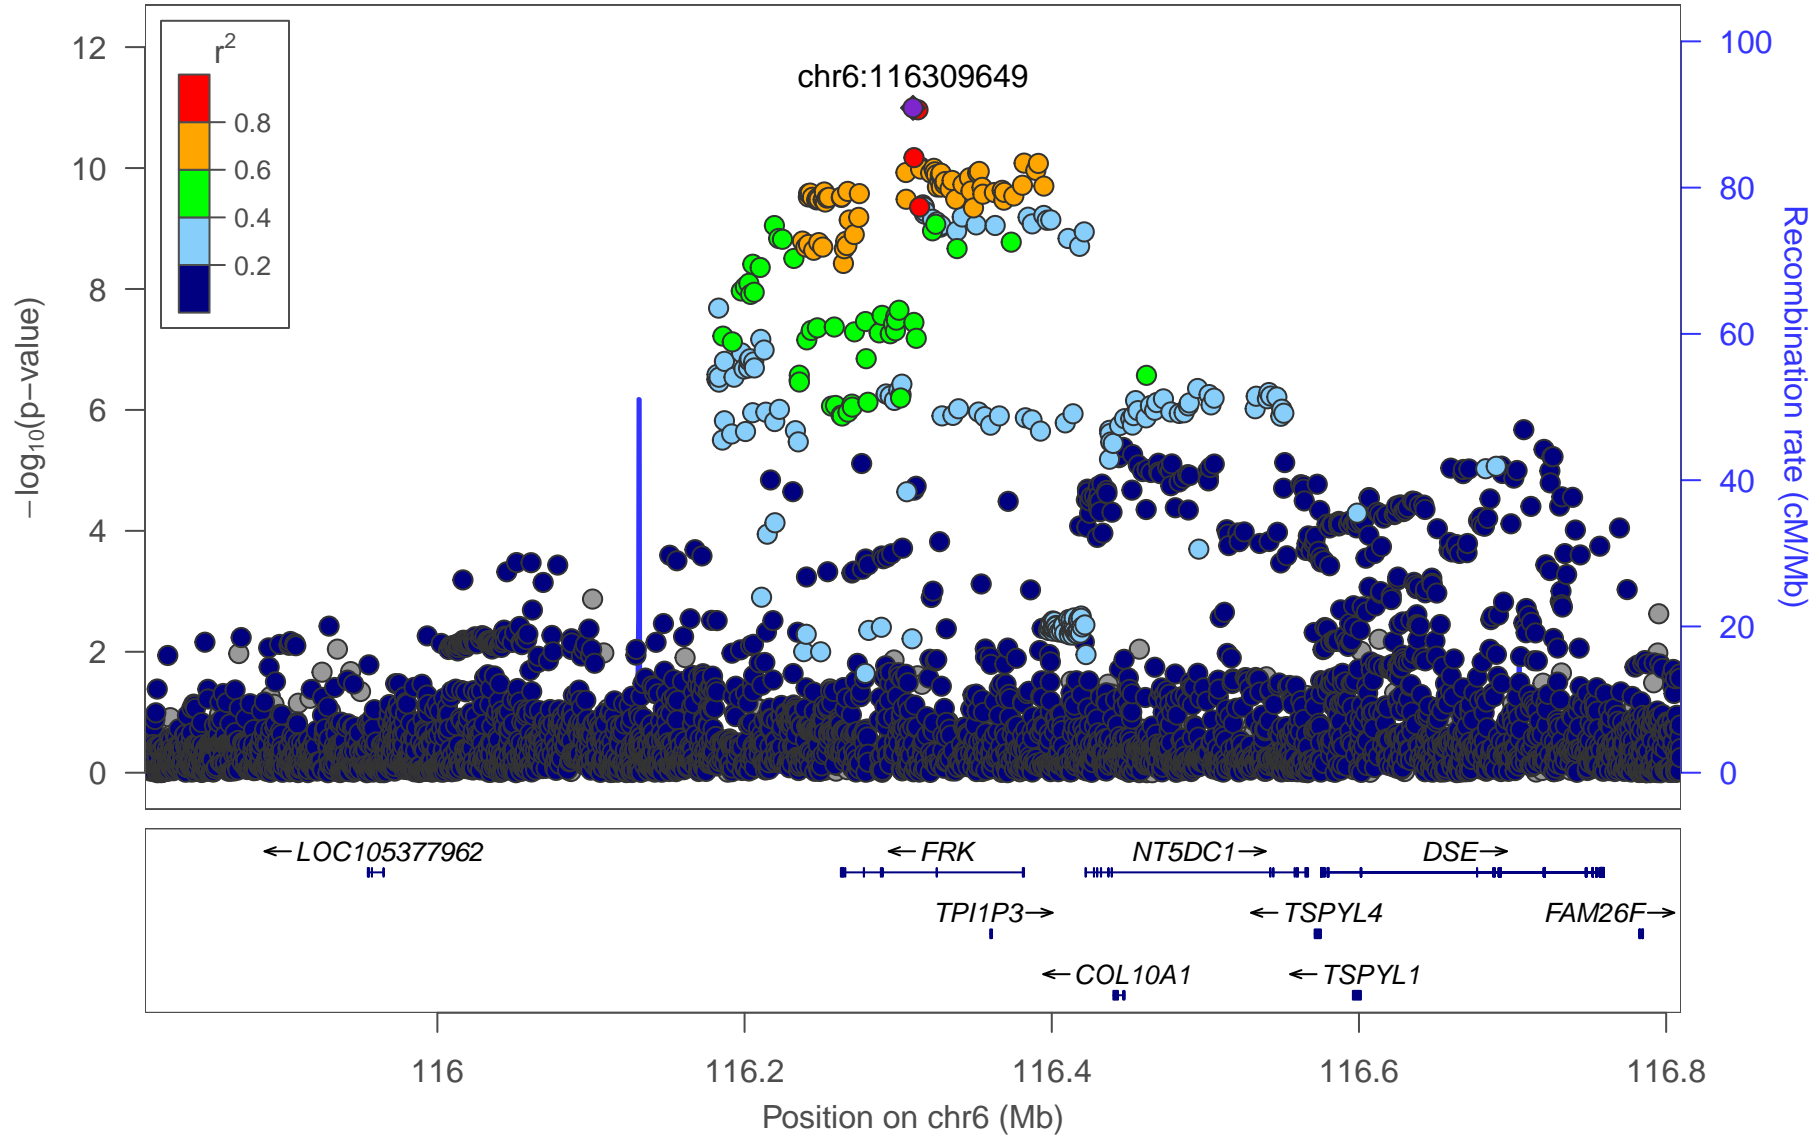

# 6\_15:ApoBbyApoA1

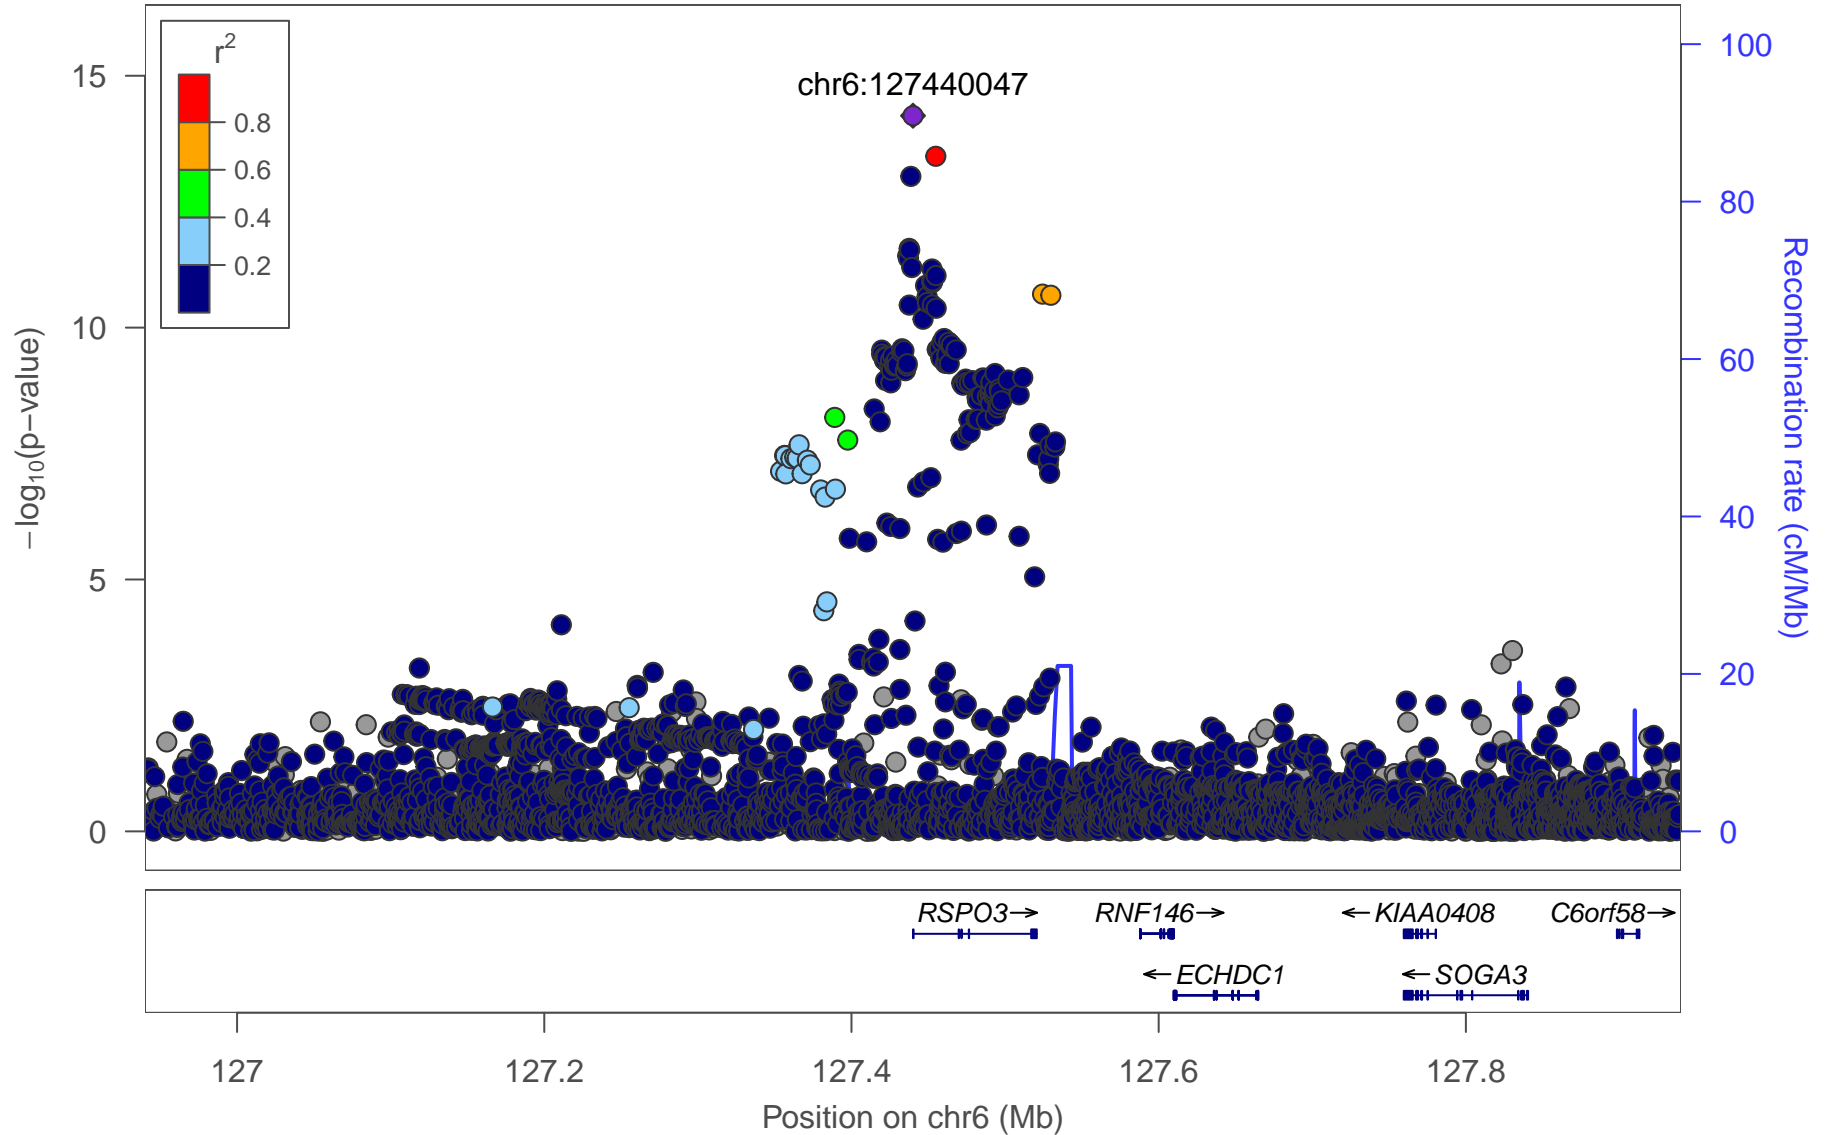

# 6\_16:Gln

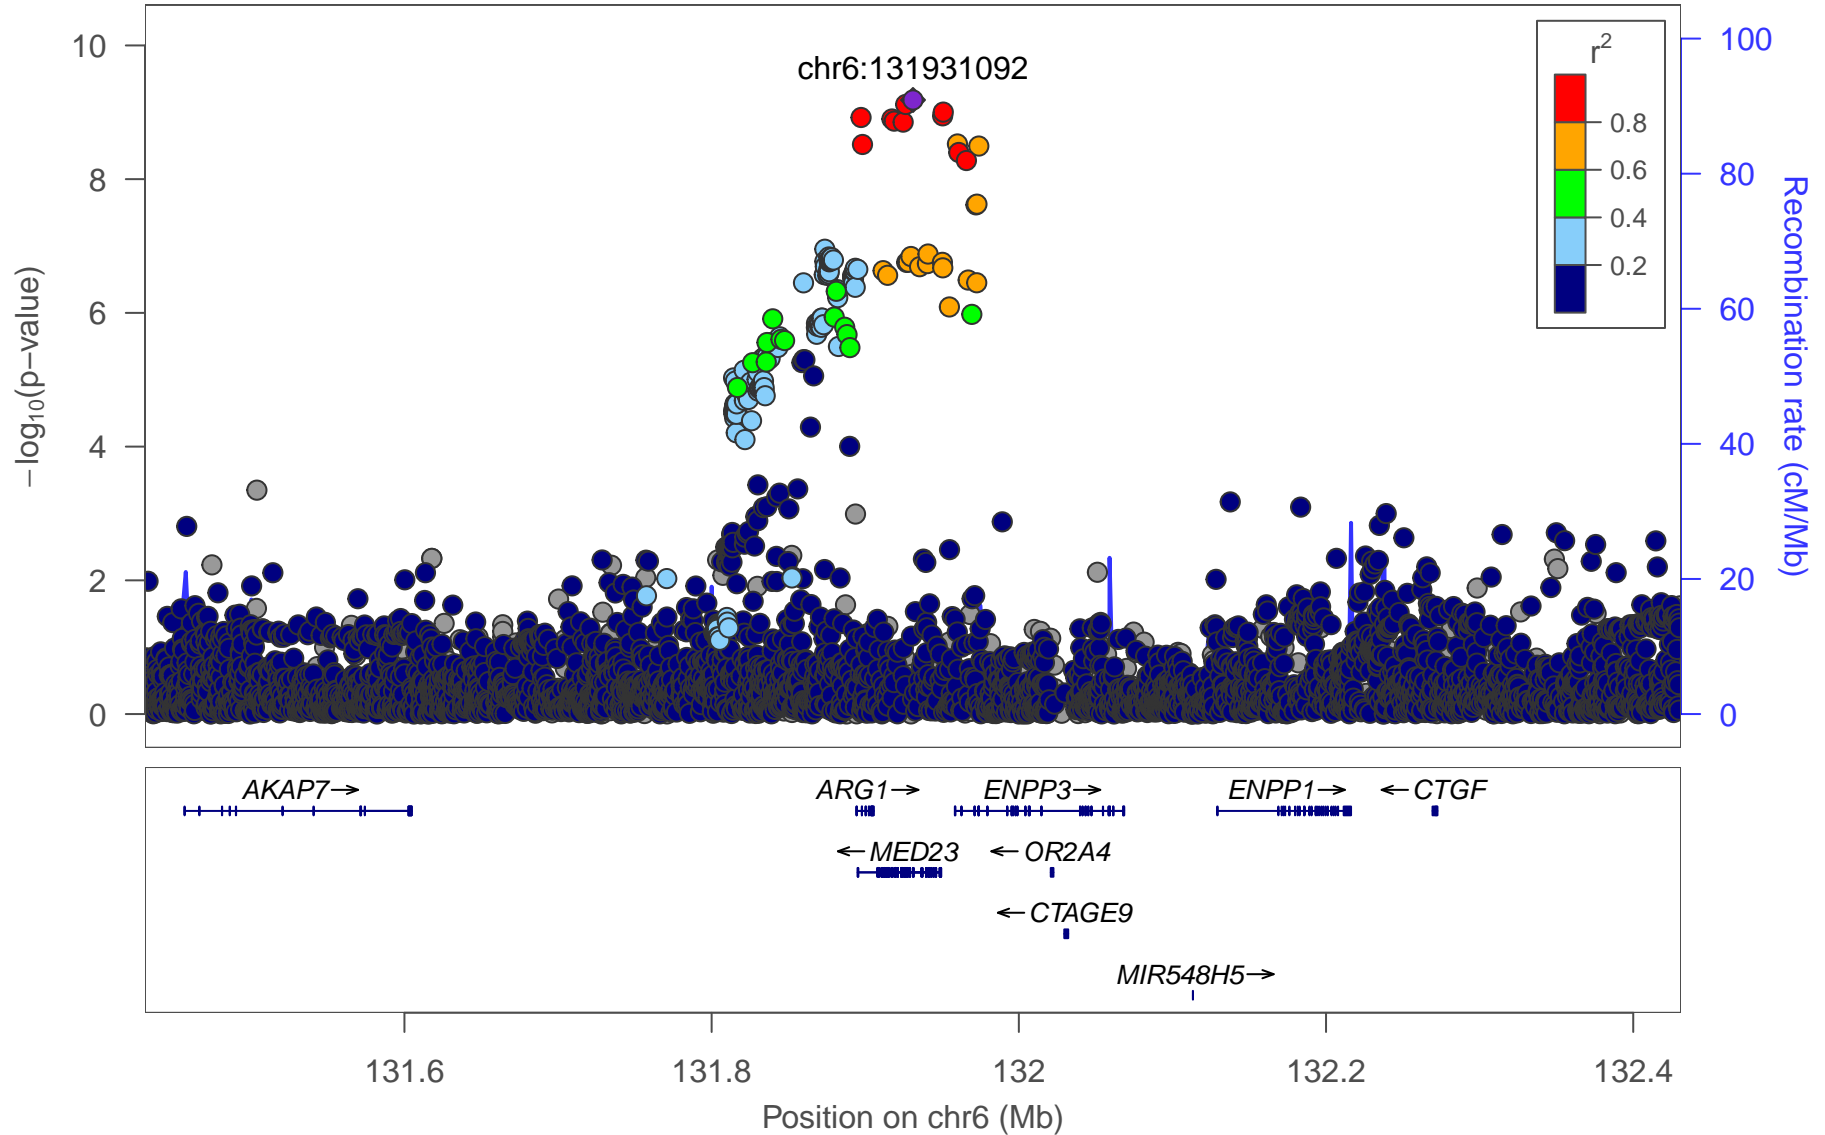

# 6\_17:S-VLDL-L

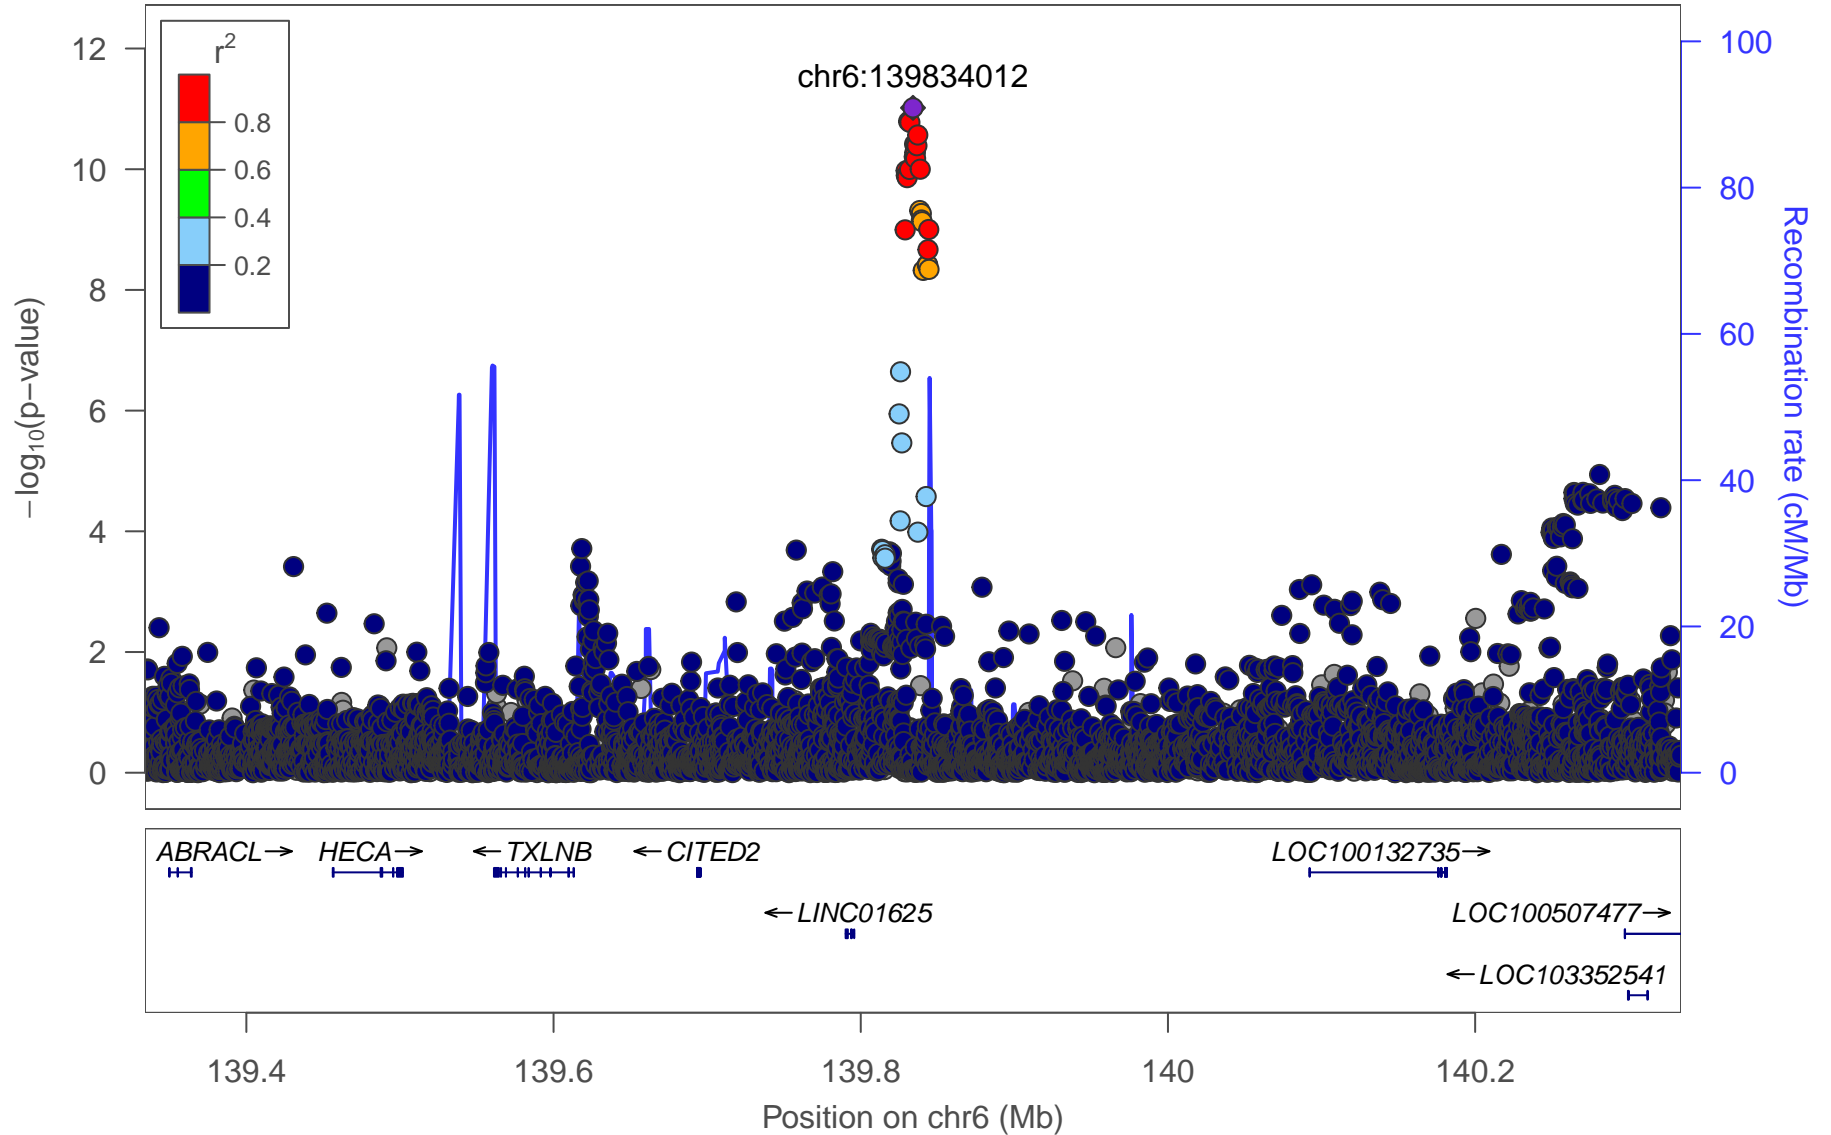

# 6\_18:XXL-VLDL-TG

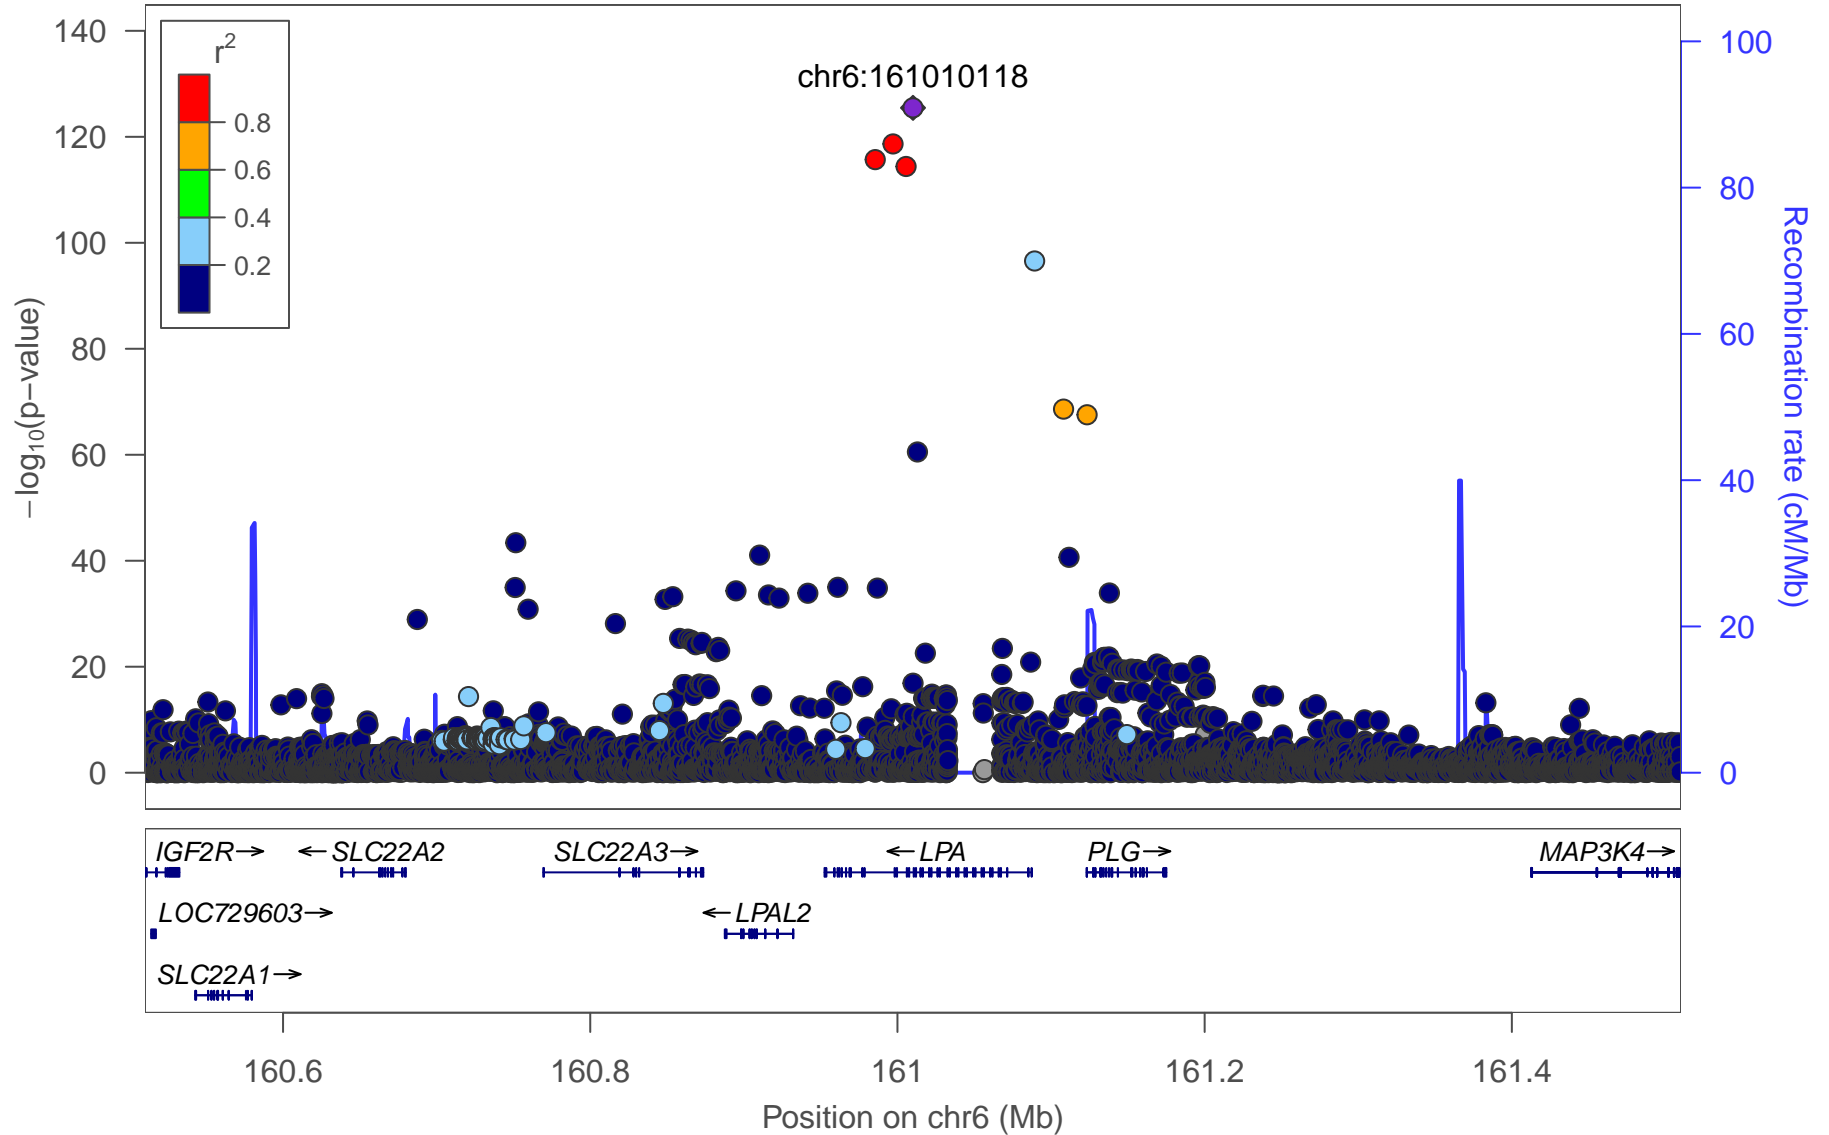

# 7\_1:L-LDL-TG

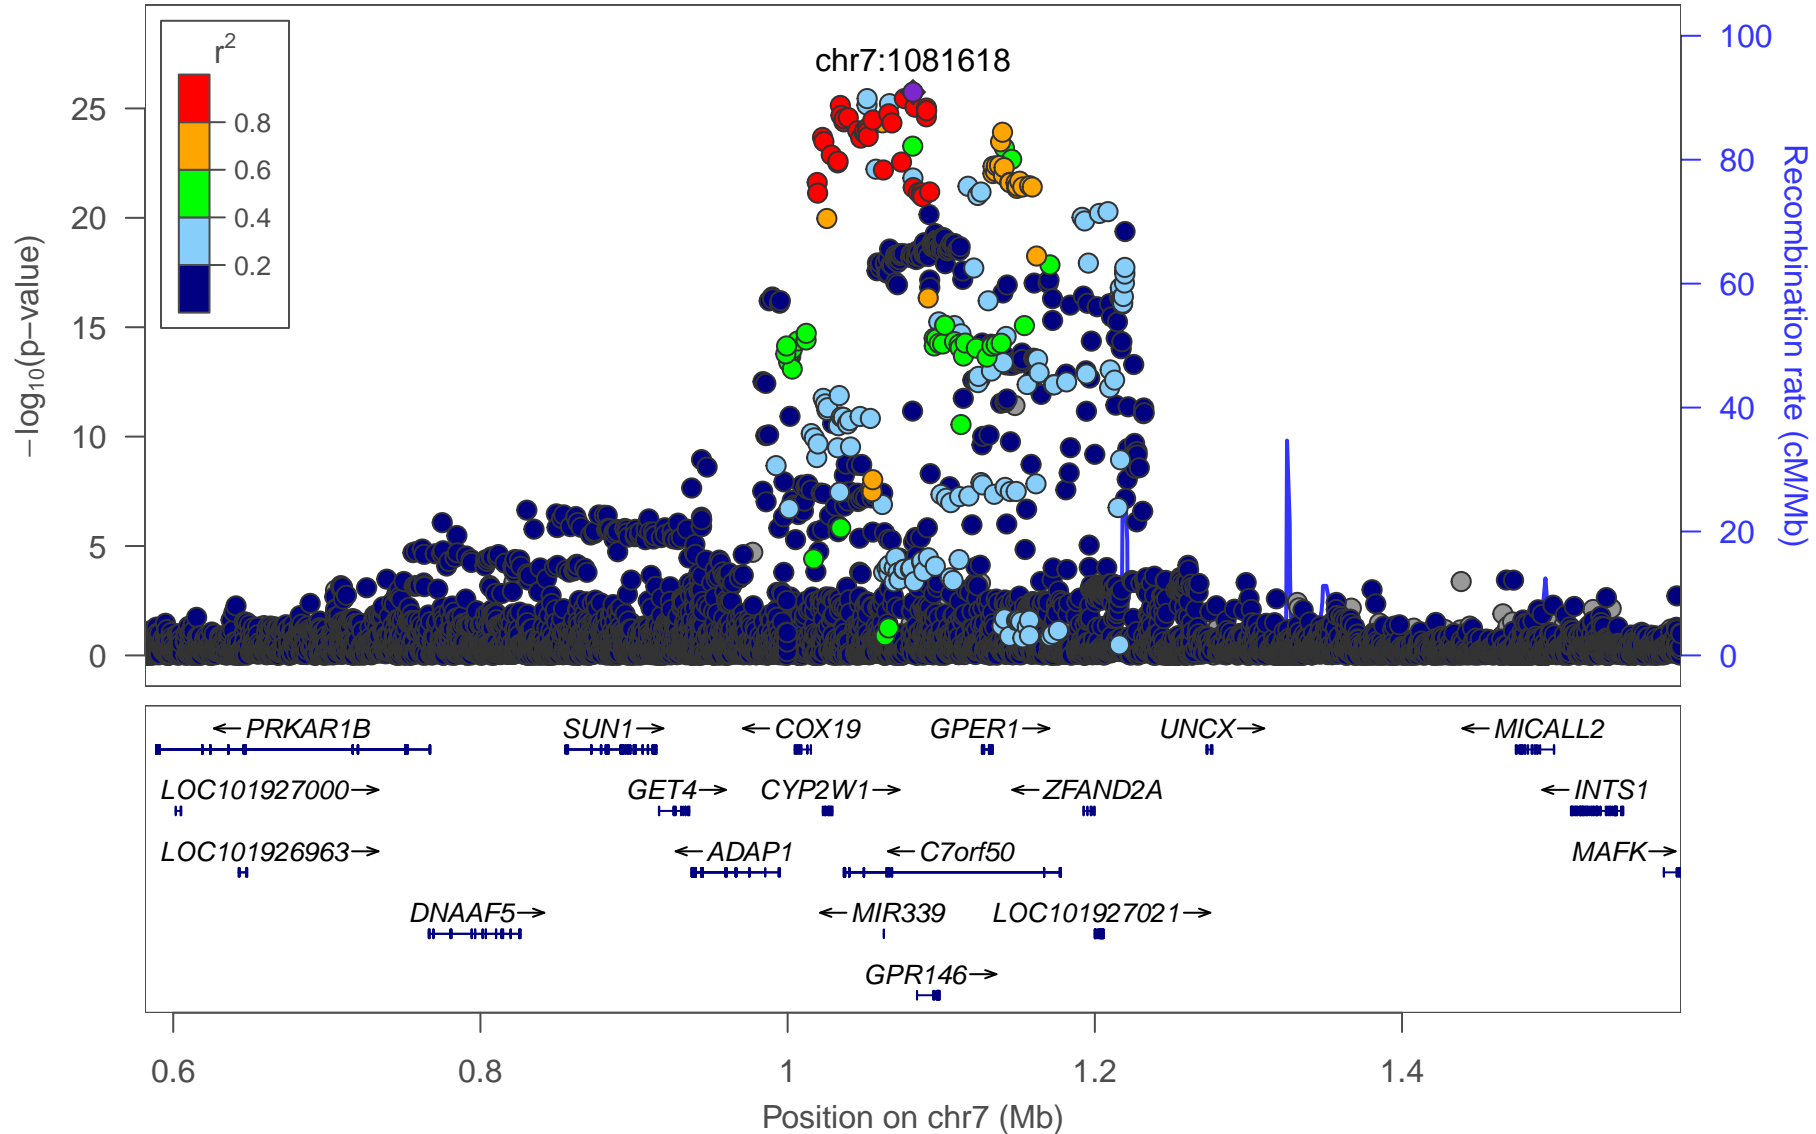



# 7\_2:XL-HDL-CE

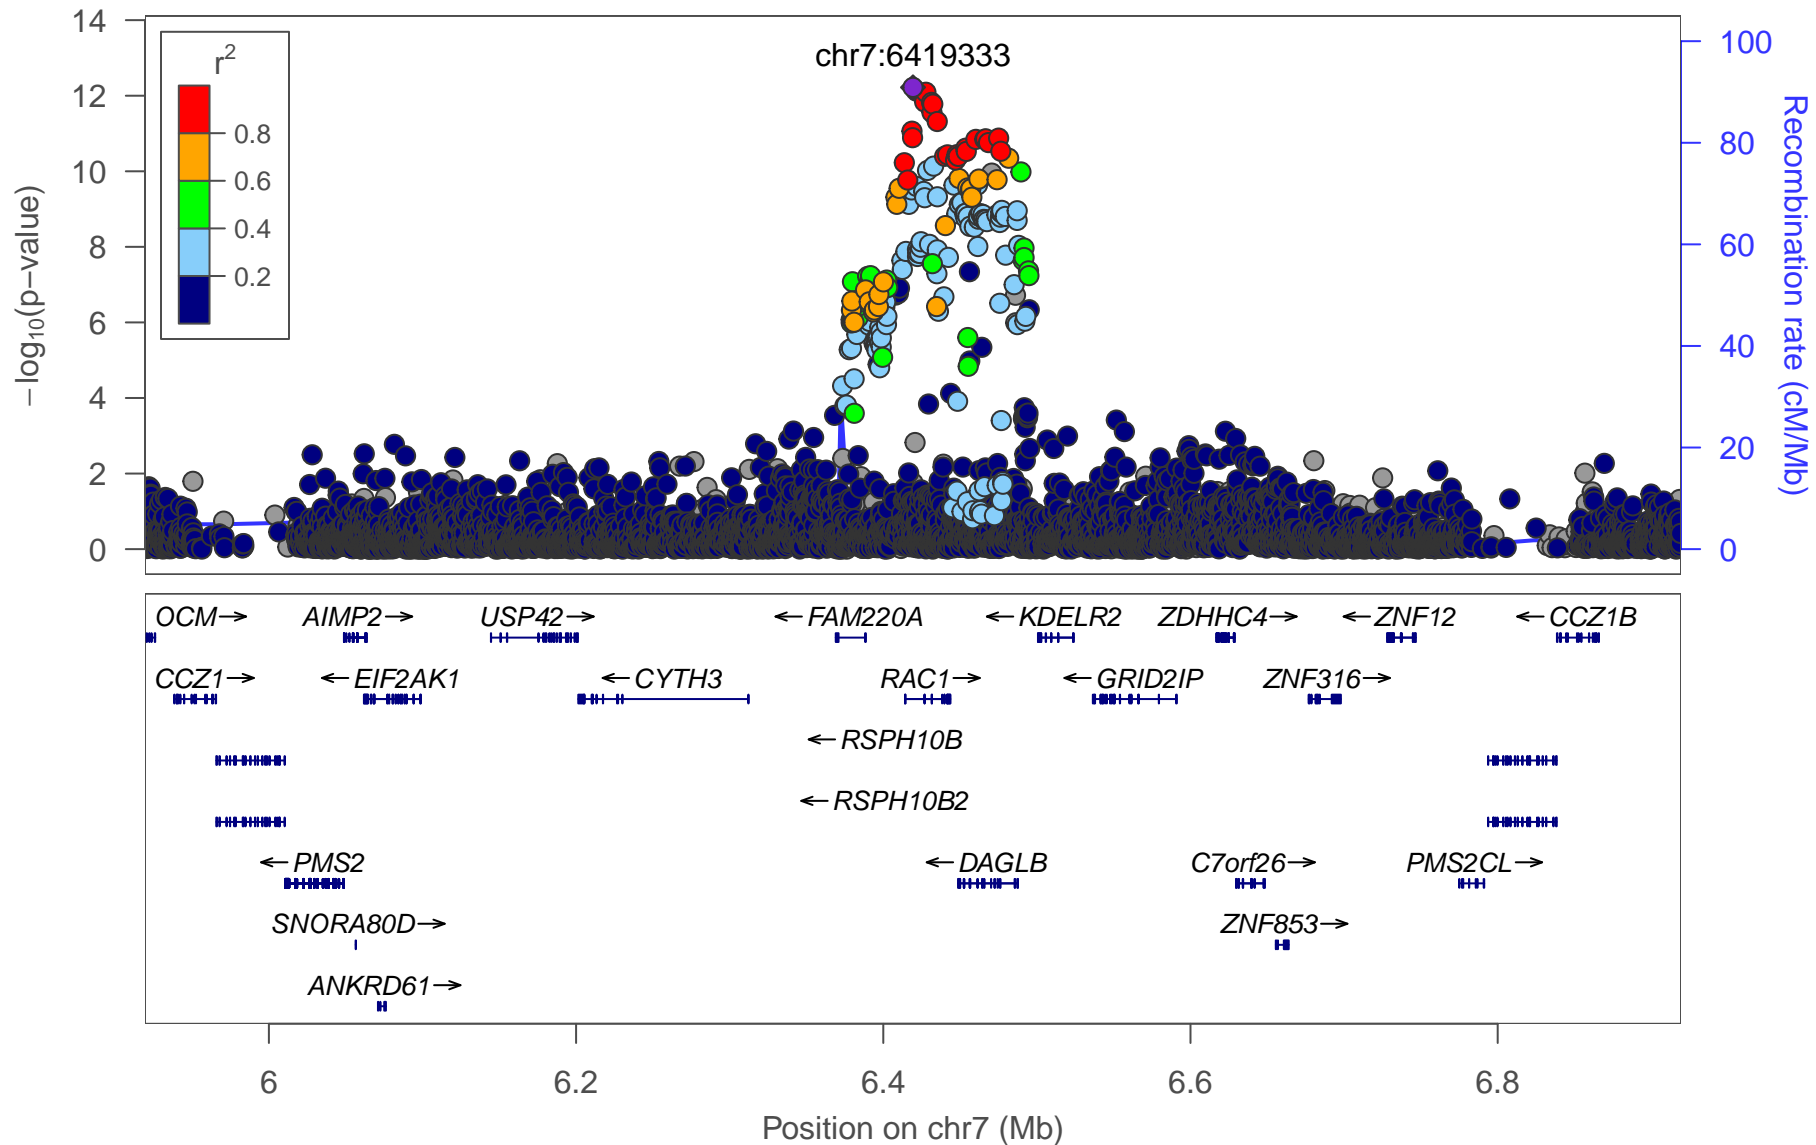

# 7\_3:Glc

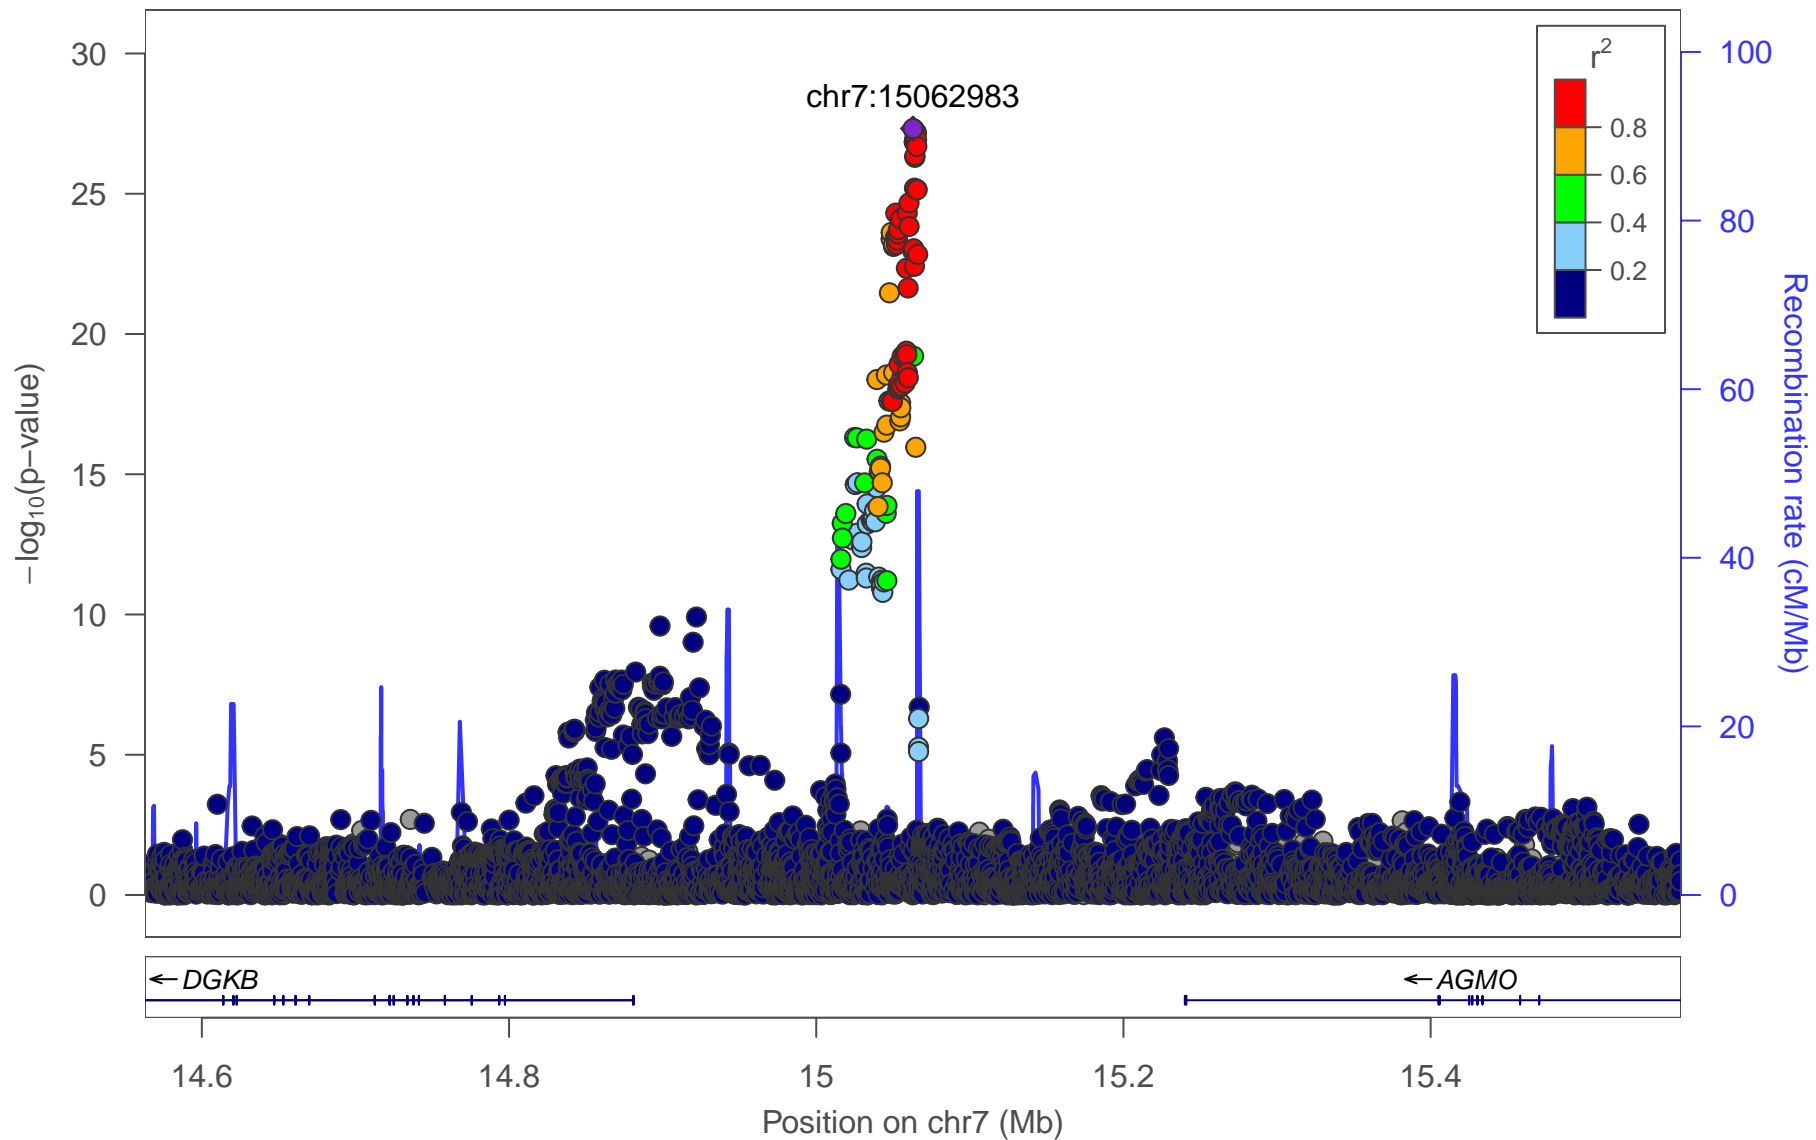

# 7\_4:HDL2-C

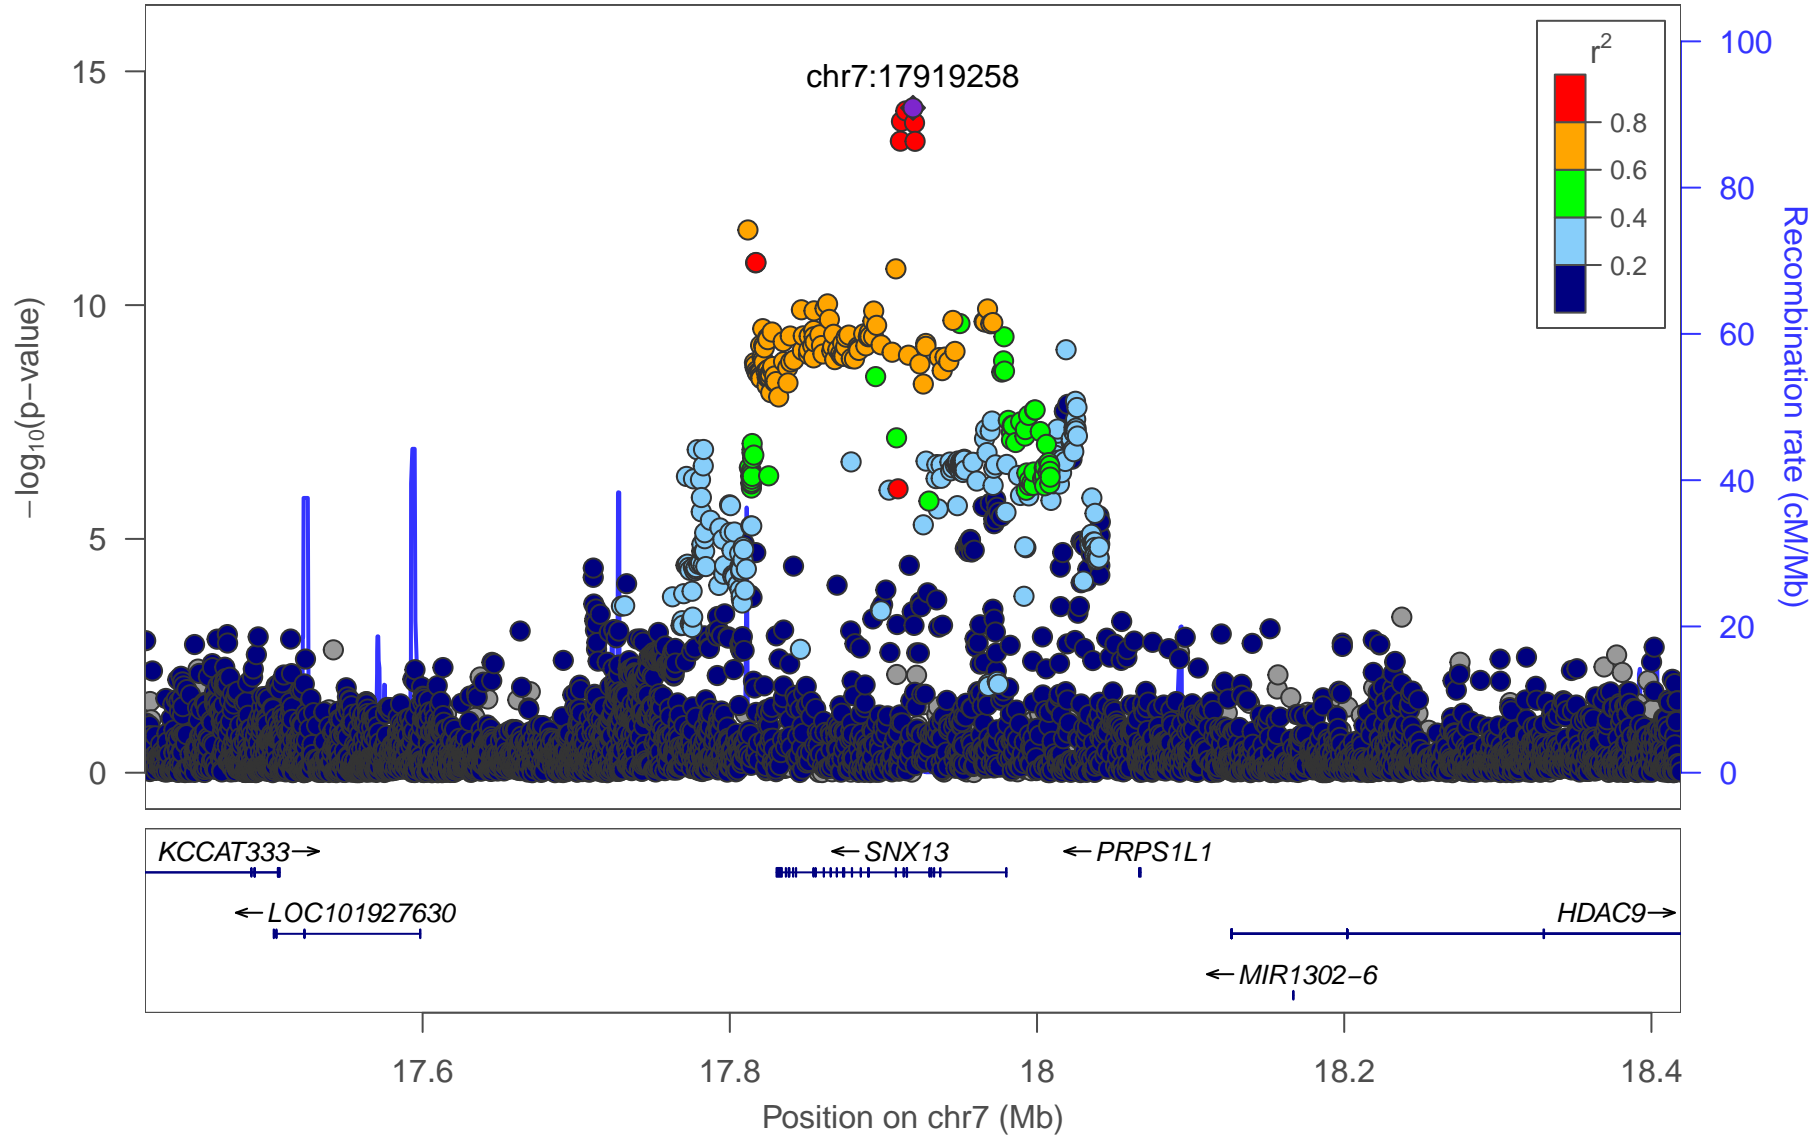

# 7\_5:IDL-P

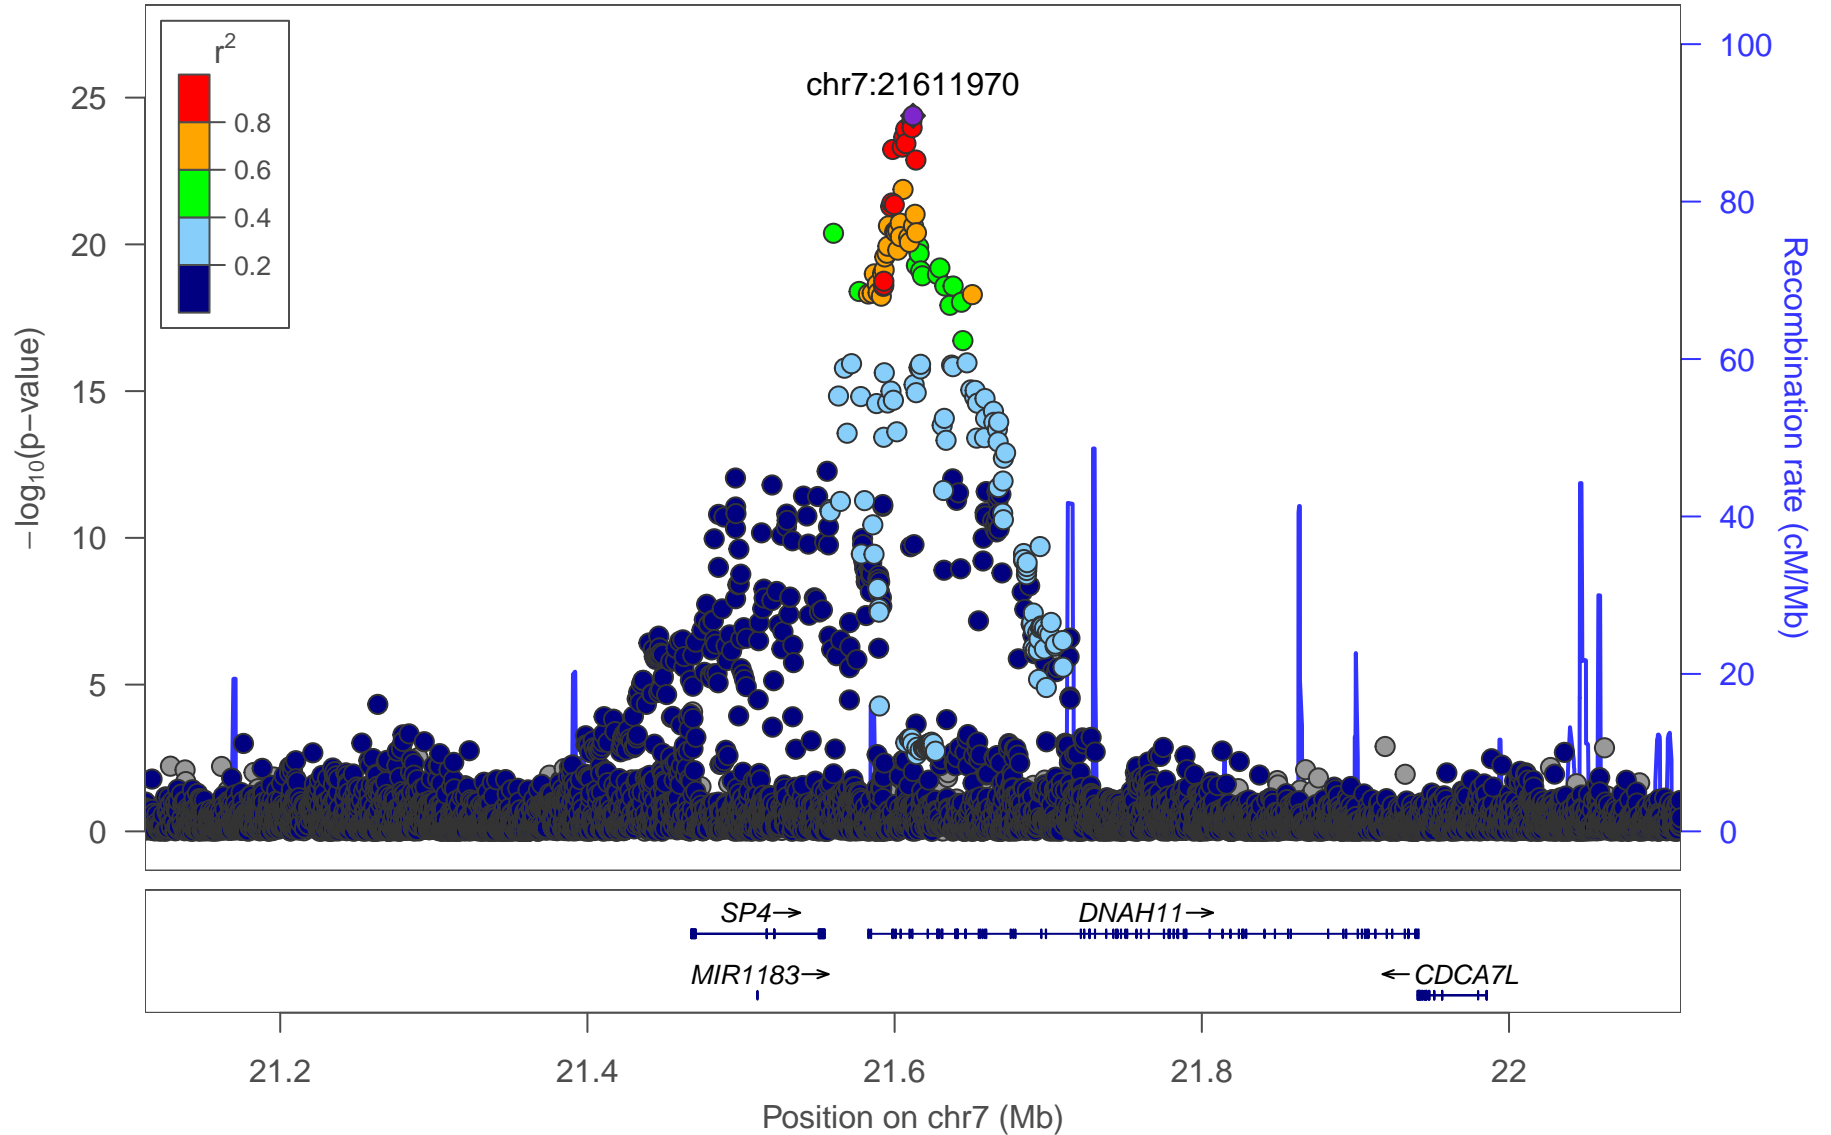

# 7\_6:S-LDL-C\_percent

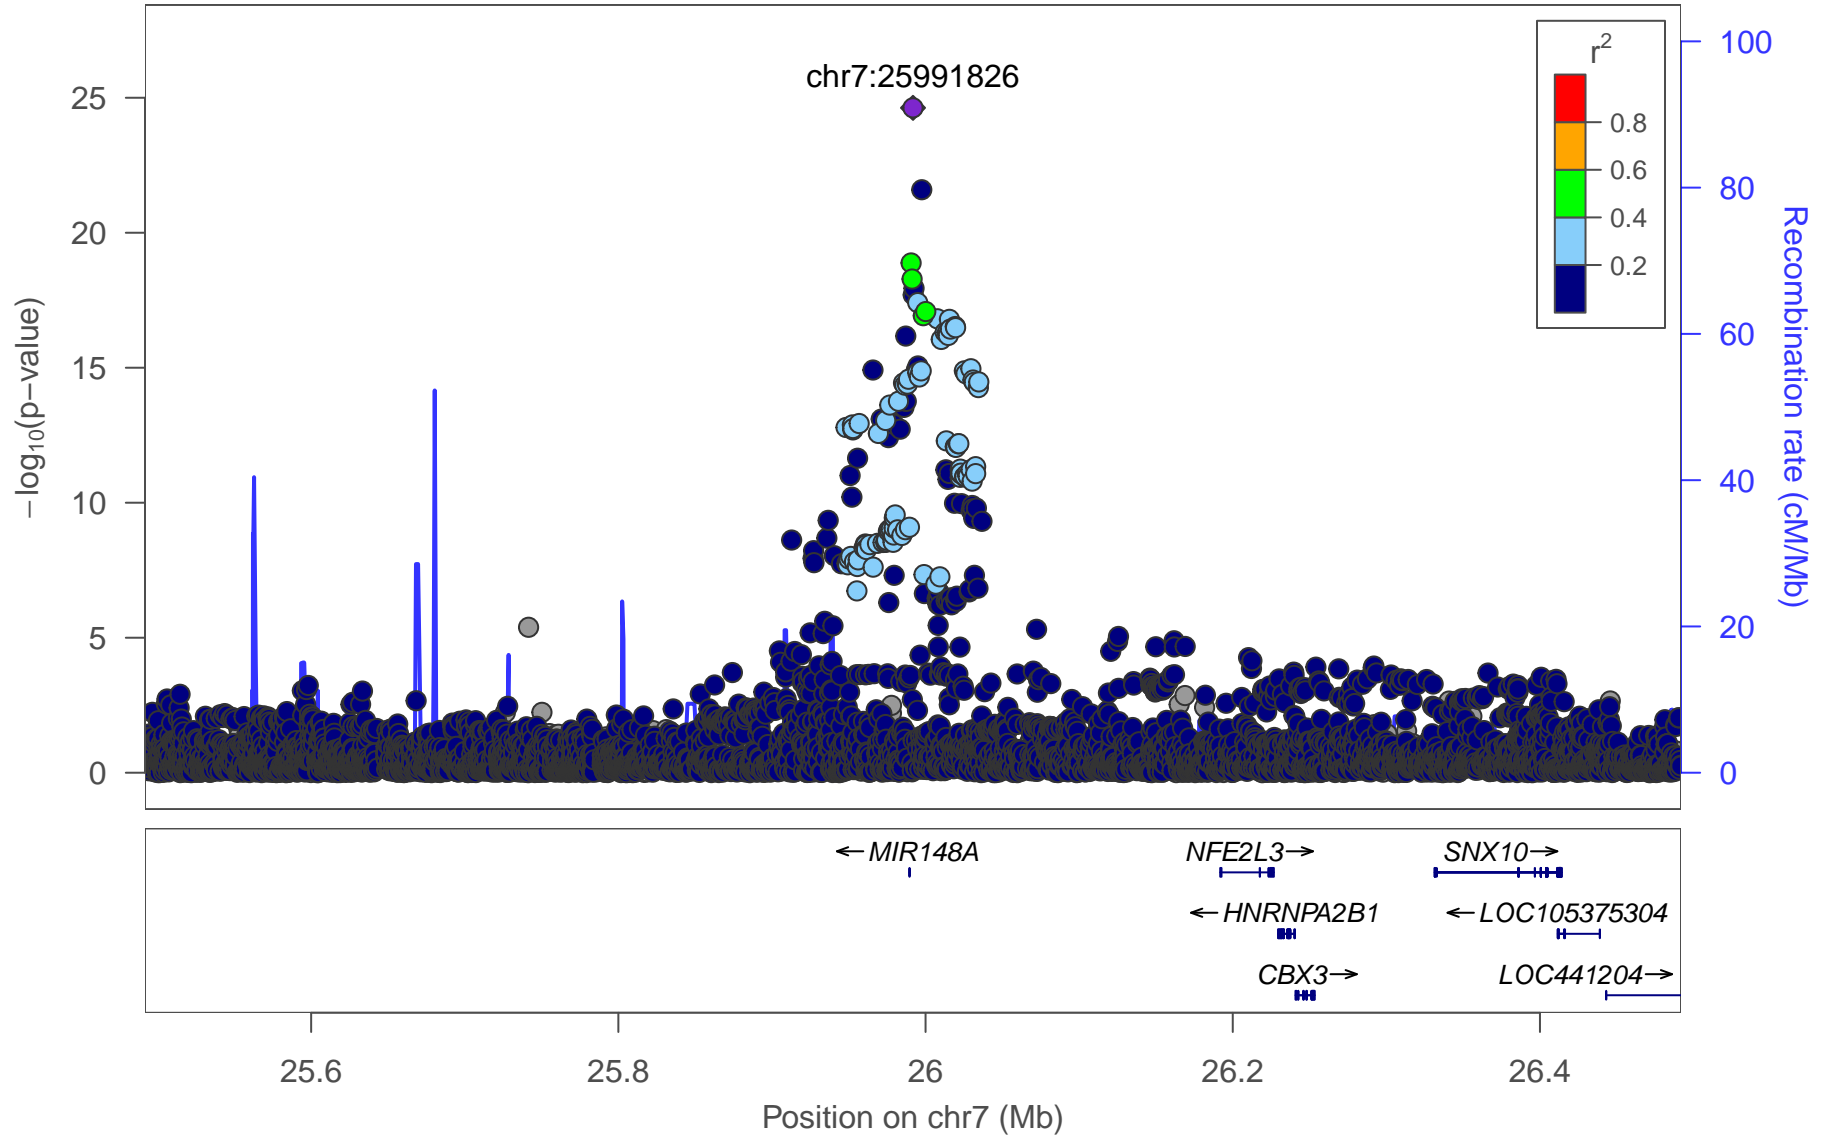

# 7\_7:Tyr

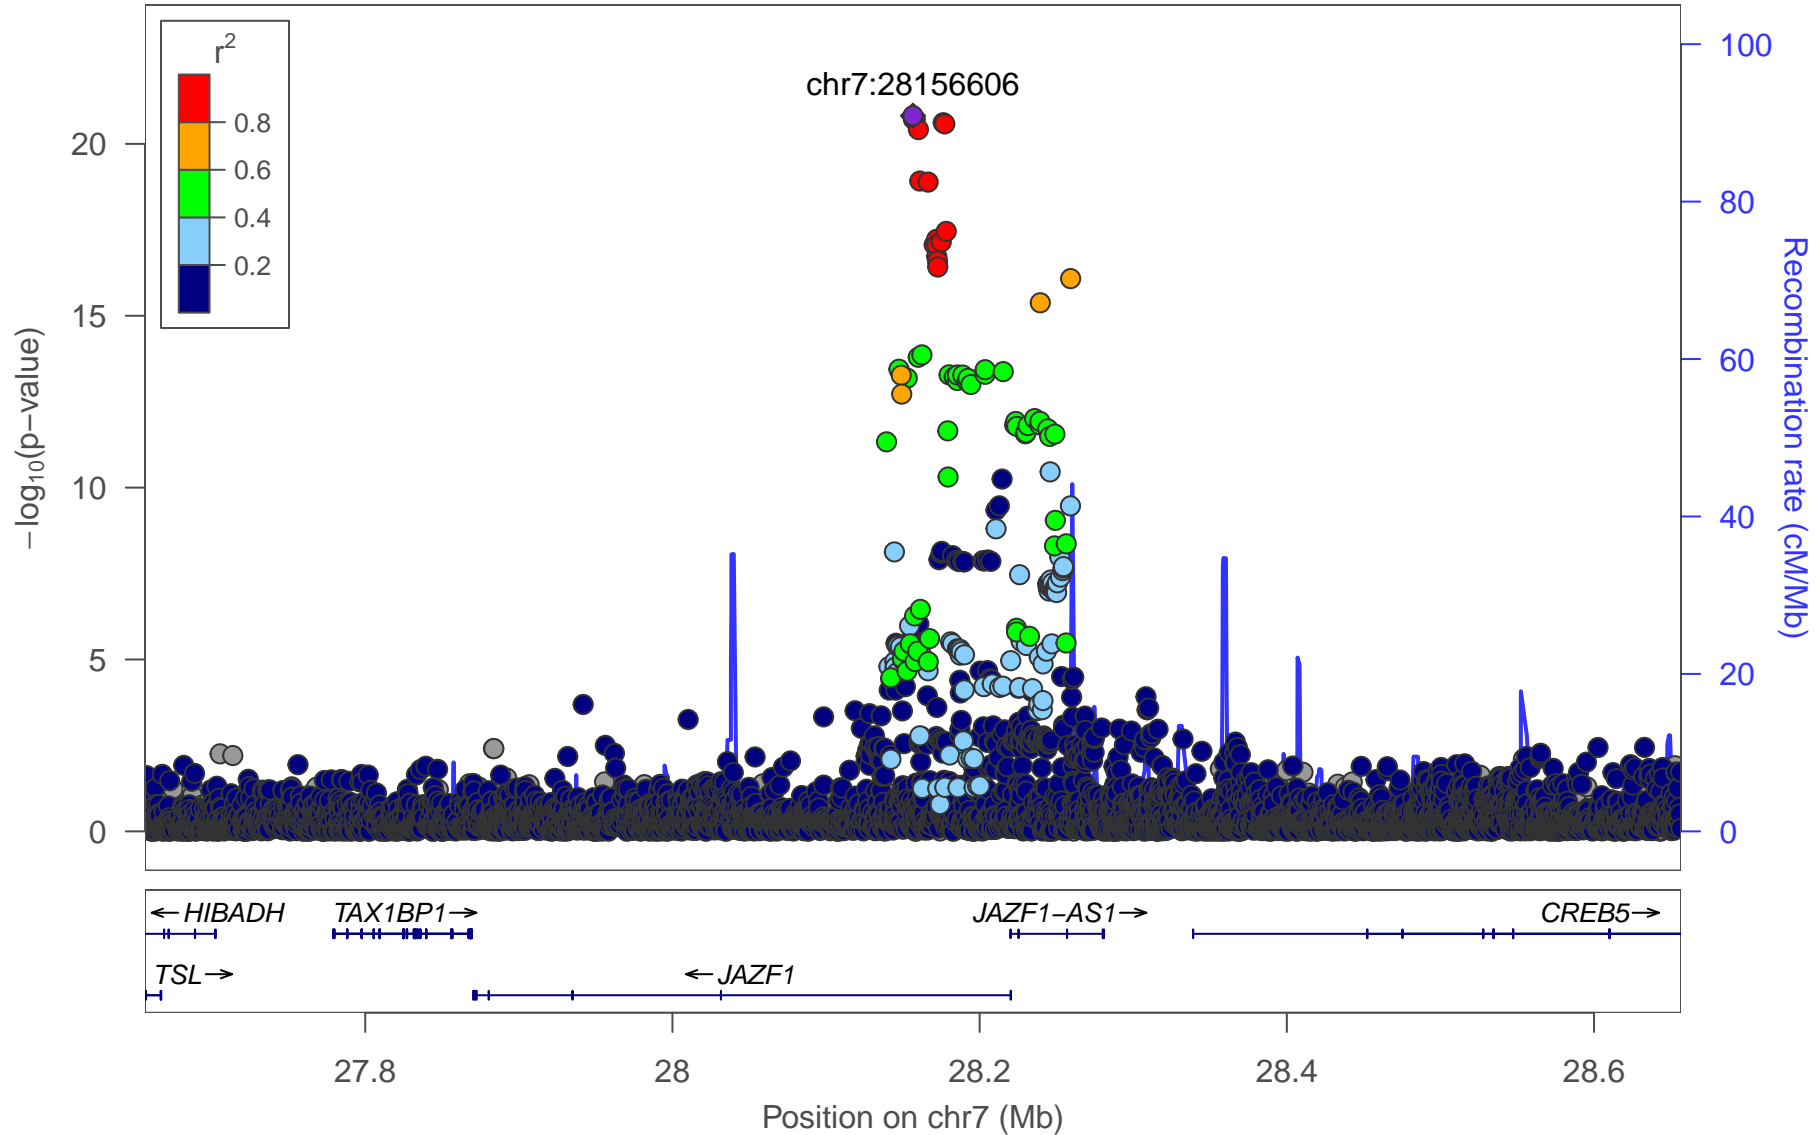

# 7\_8:Glc

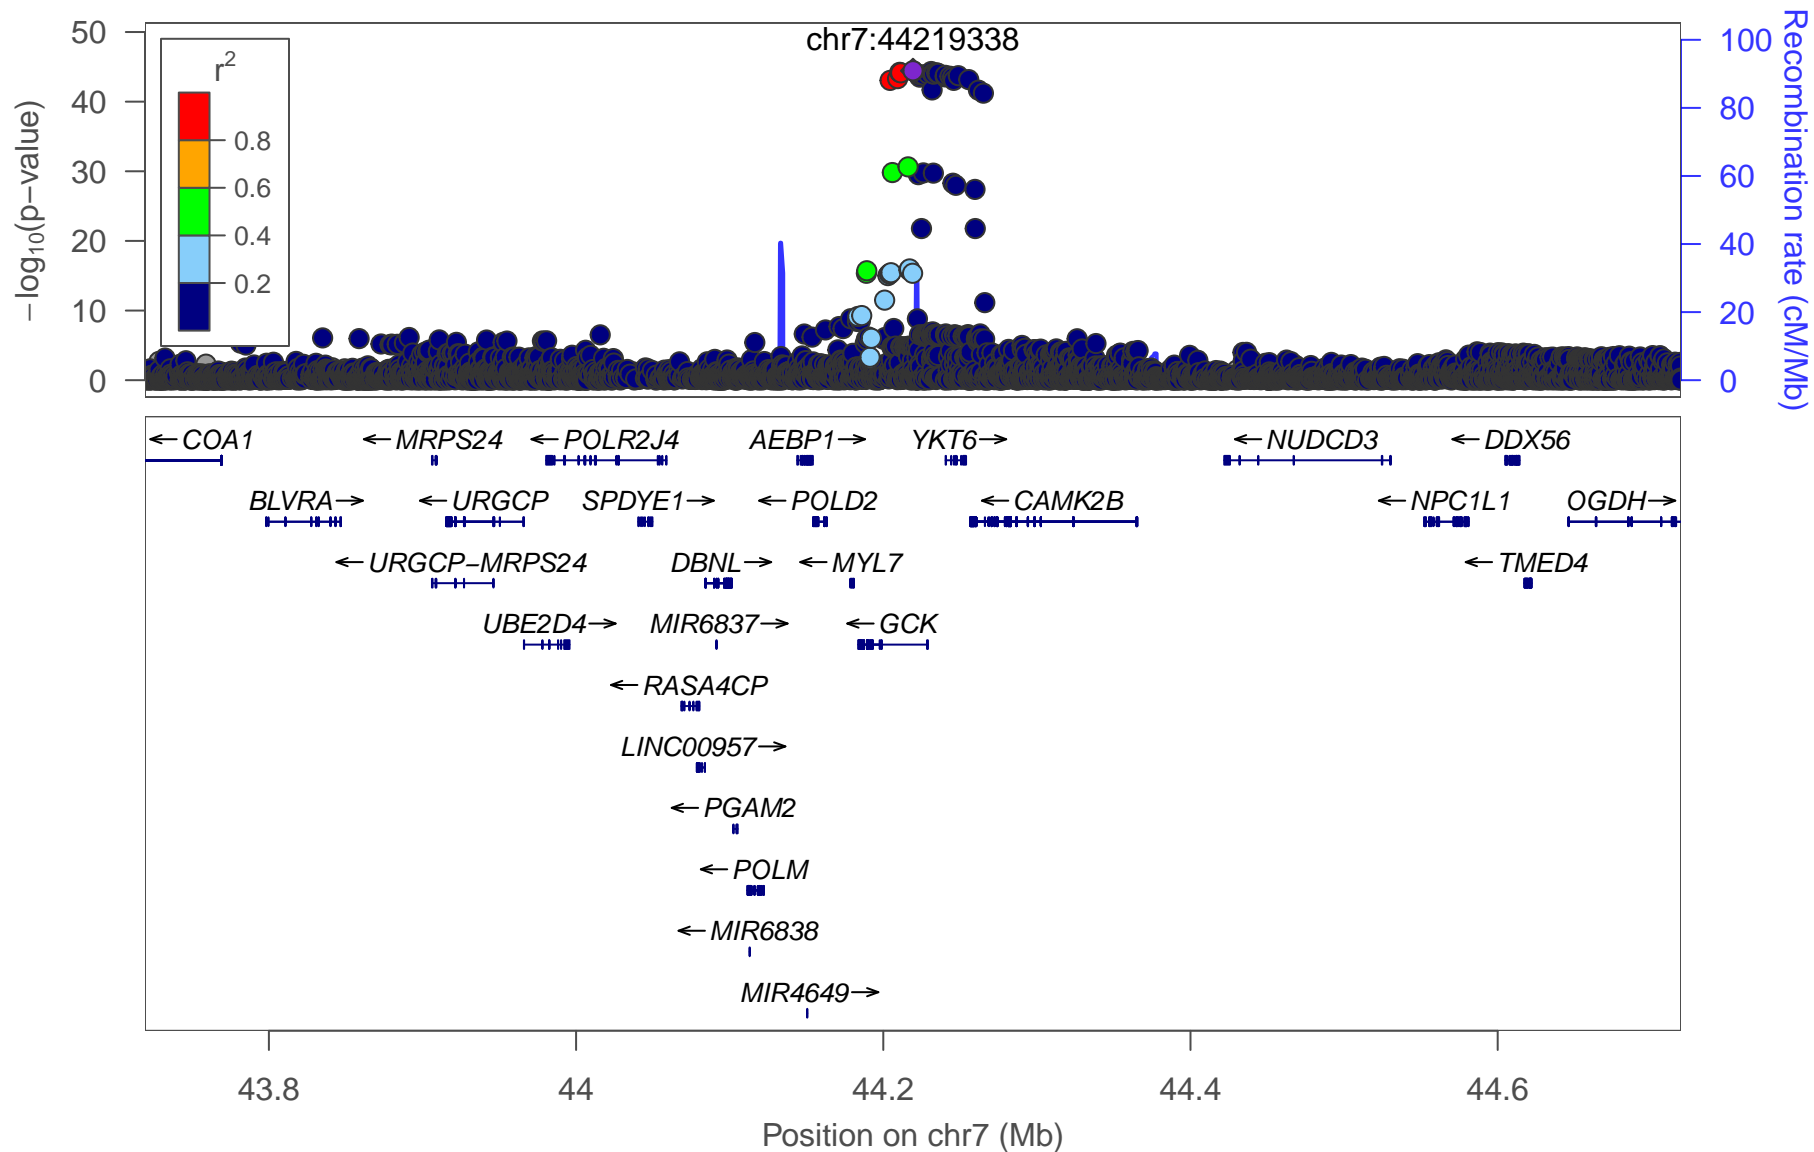

# 7\_9:Crea

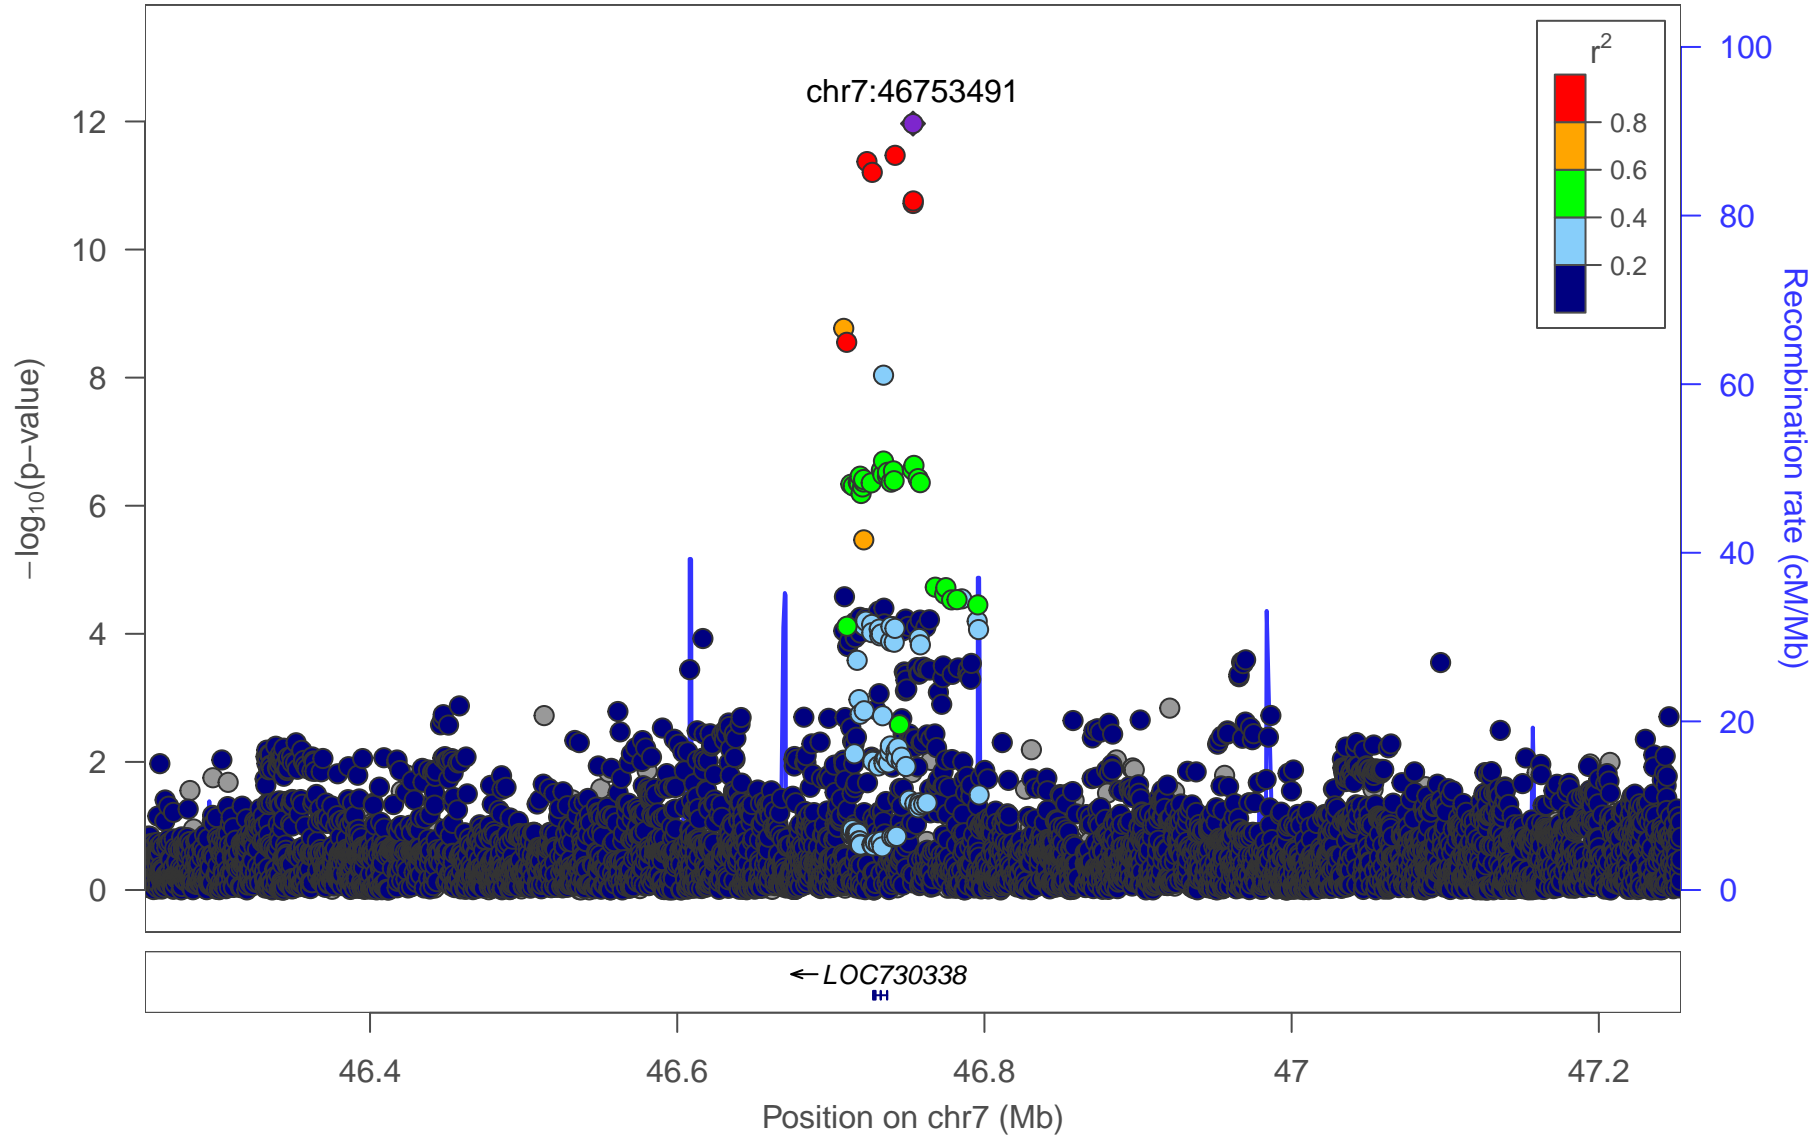



# 7\_10:Glc

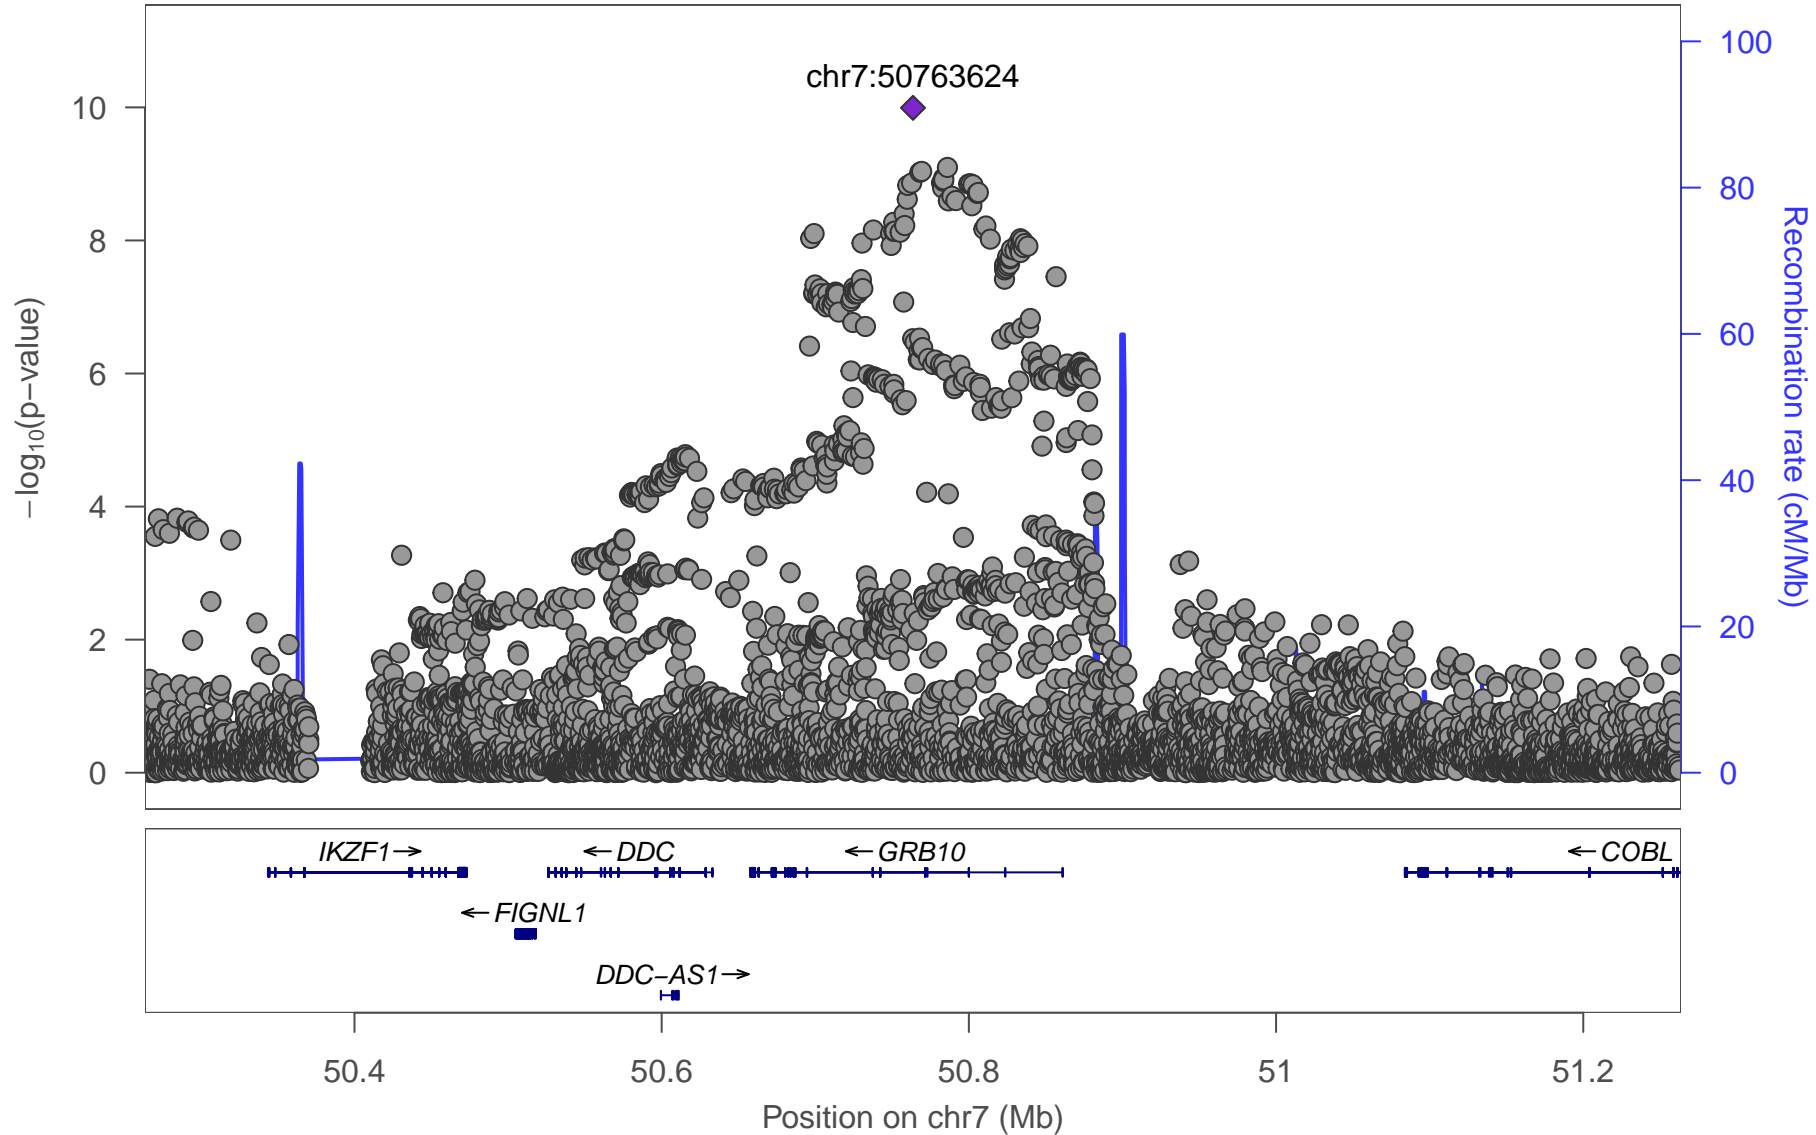

# 7\_11:Gly

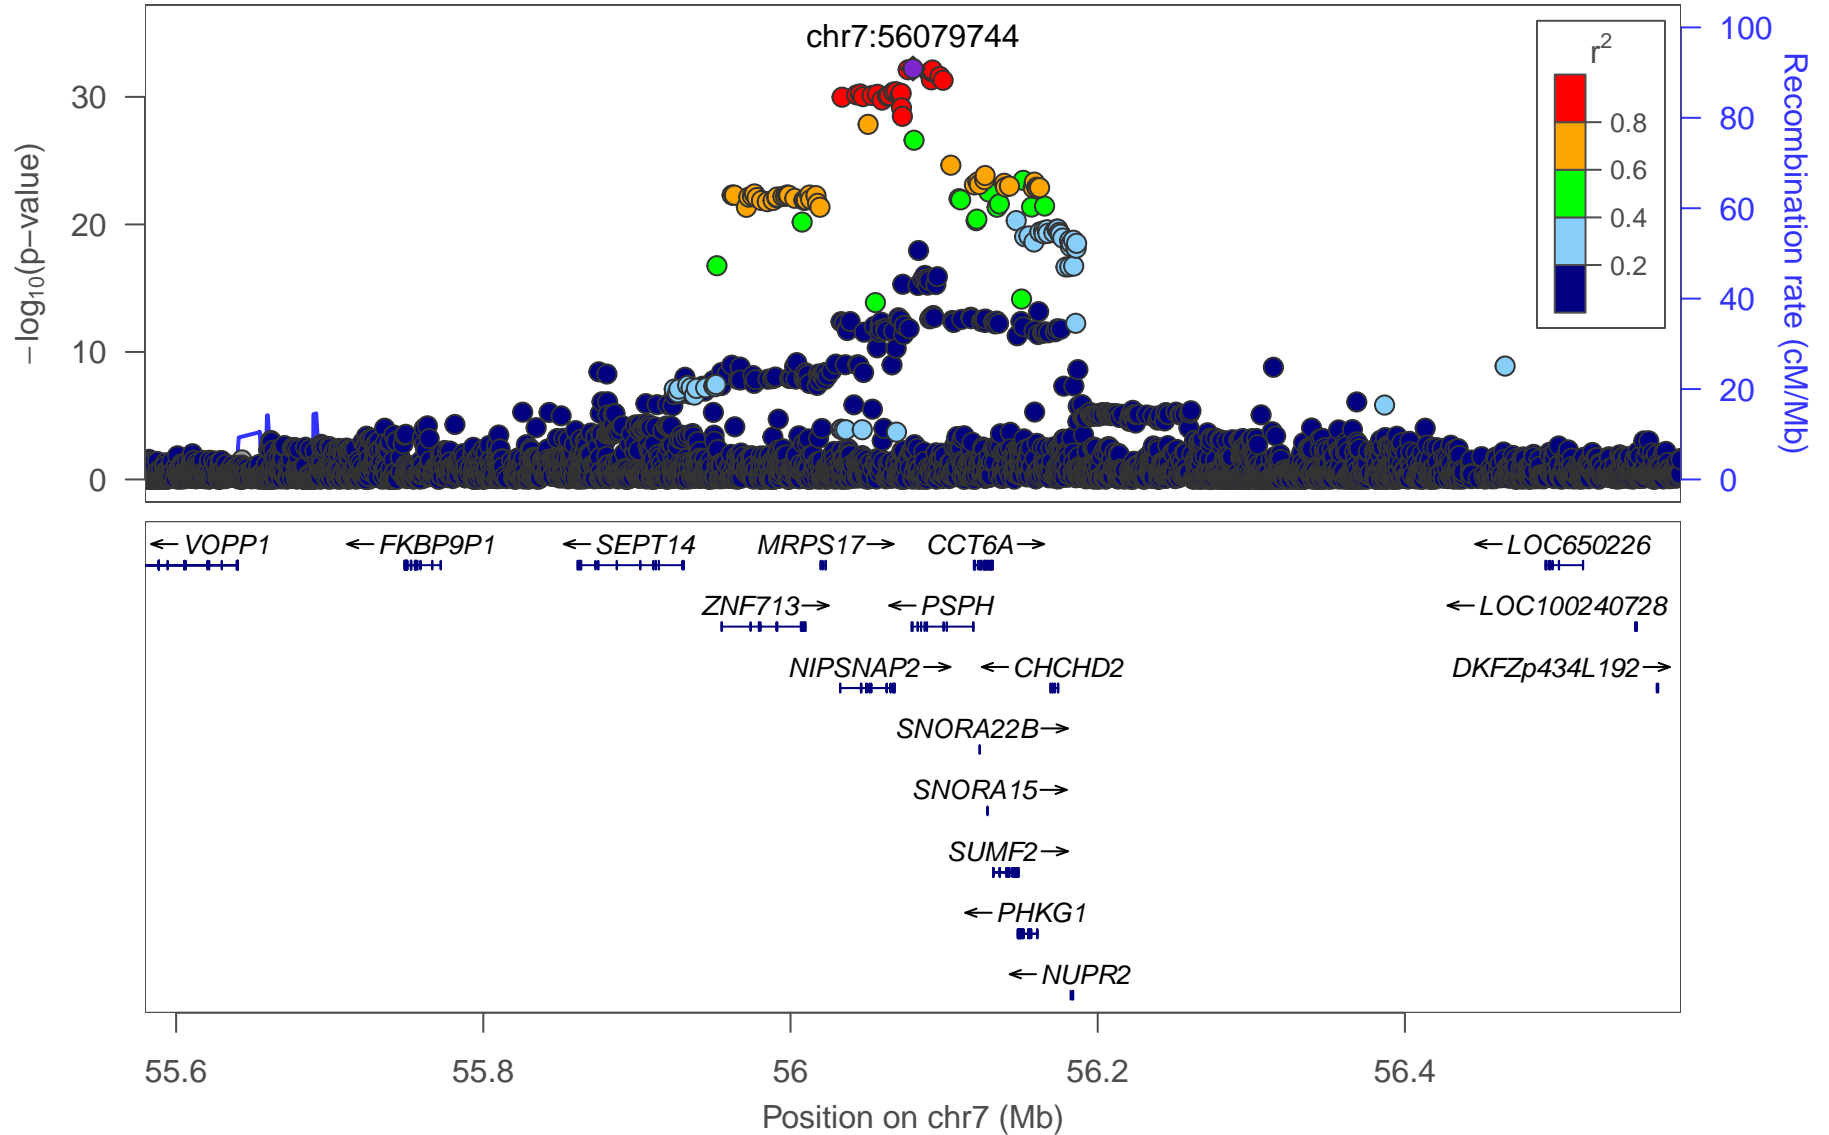

# 7\_12:S-VLDL-TG

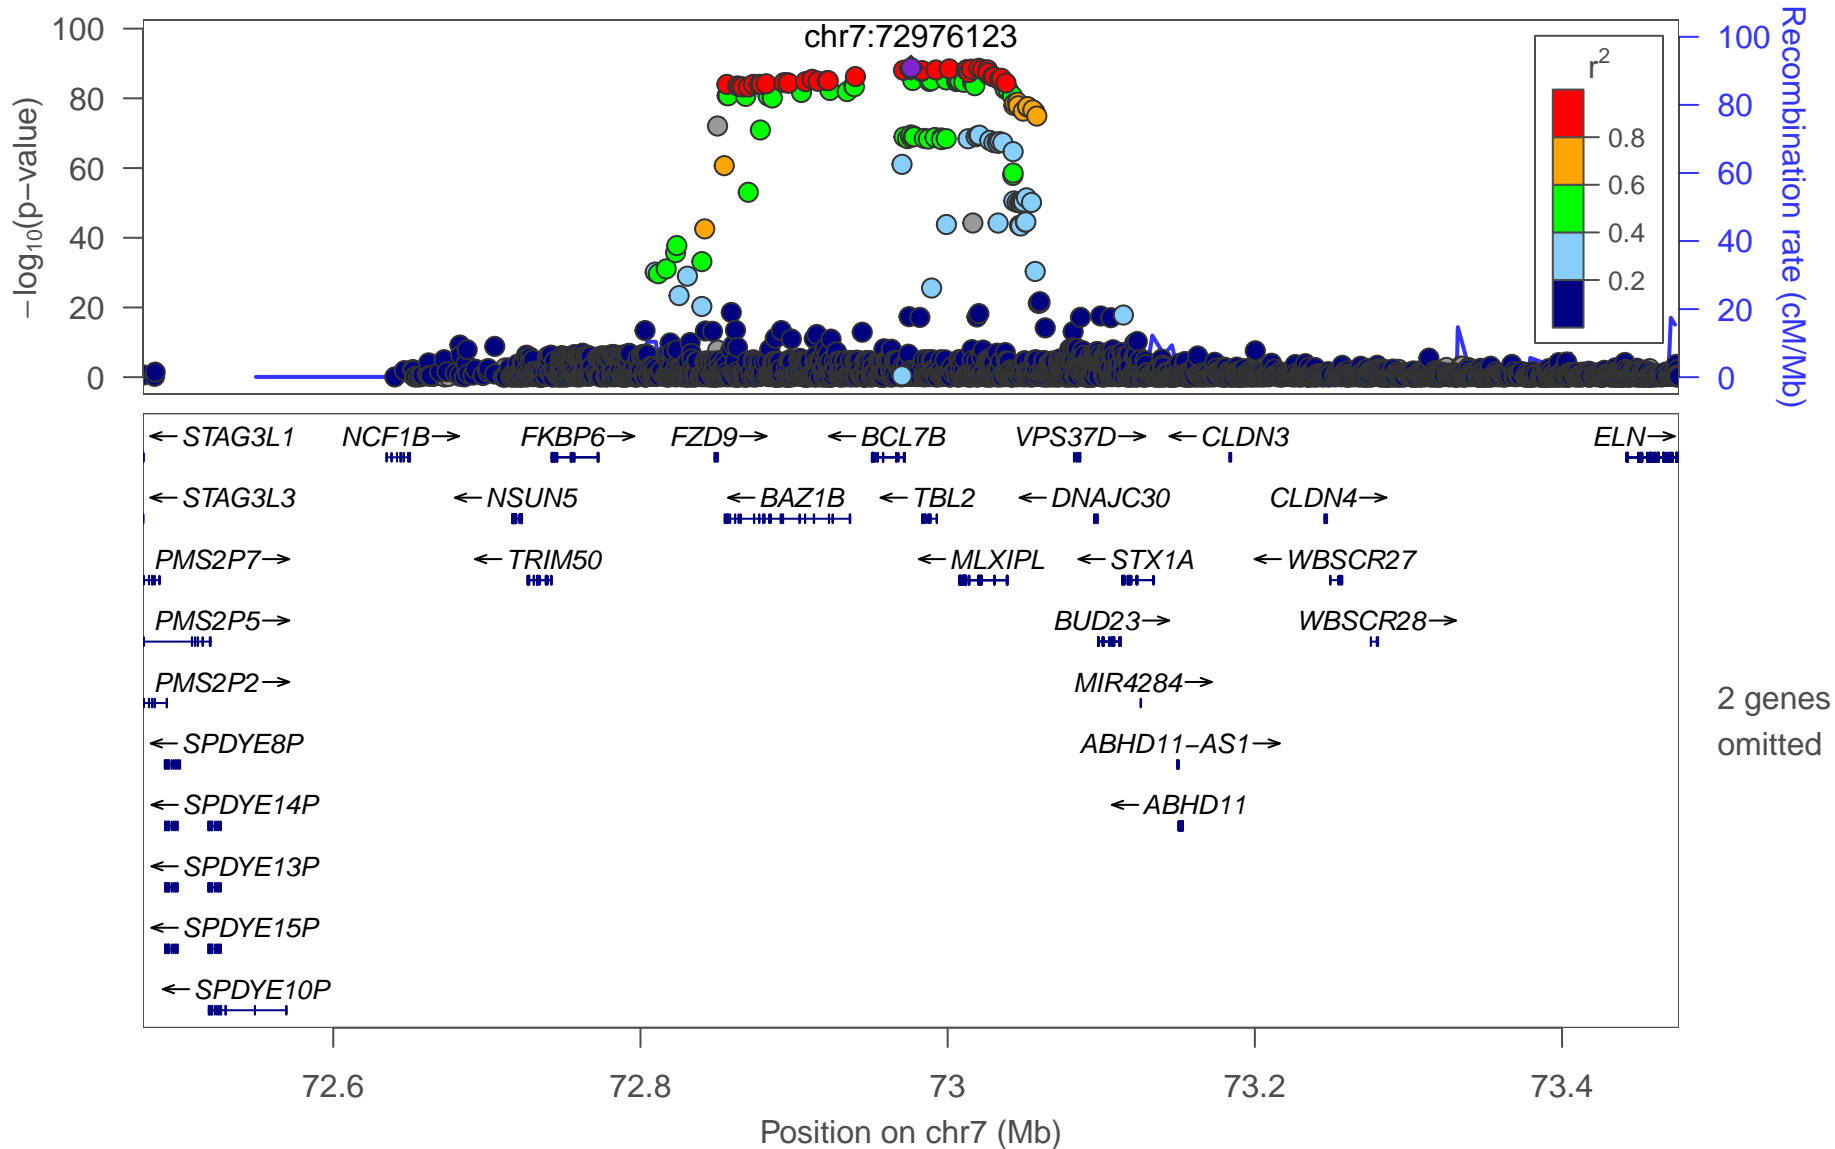

# 7\_13:Crea

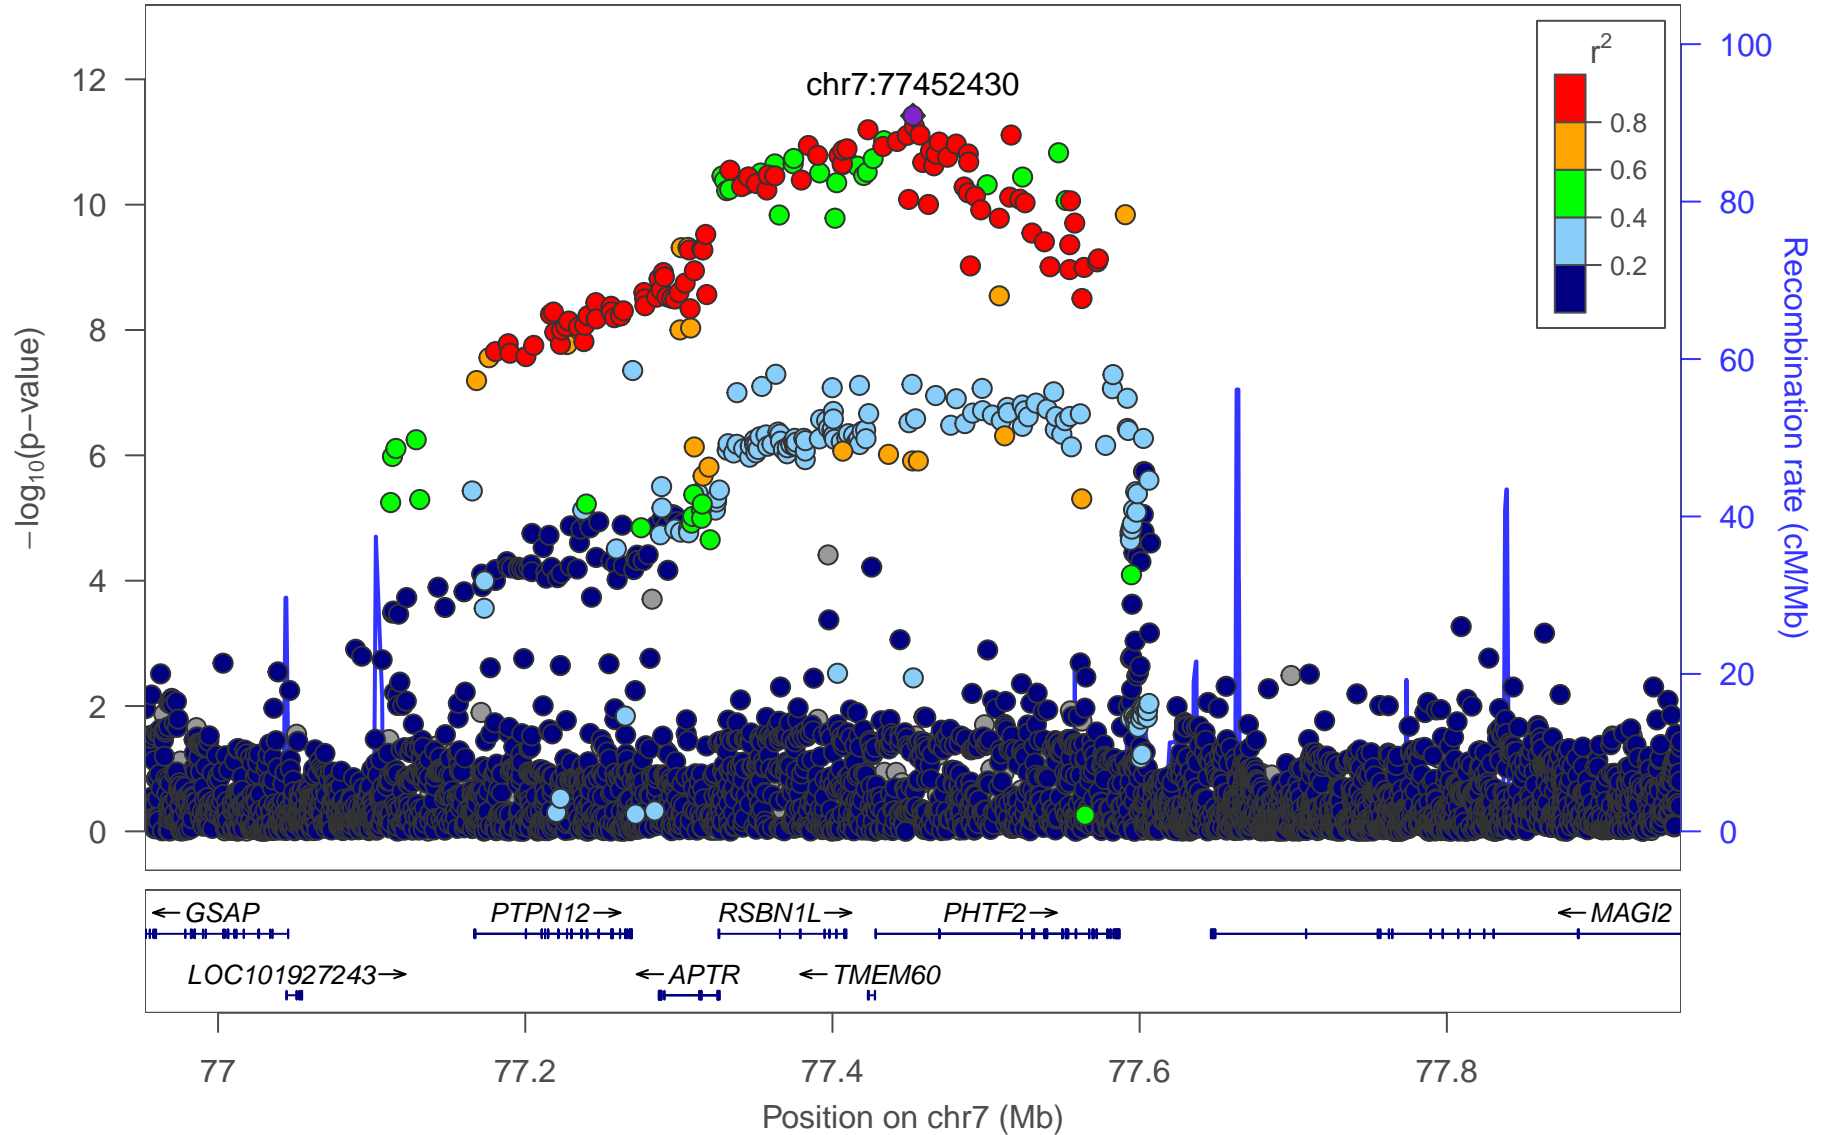

# 7\_14:S-HDL-PL\_percent

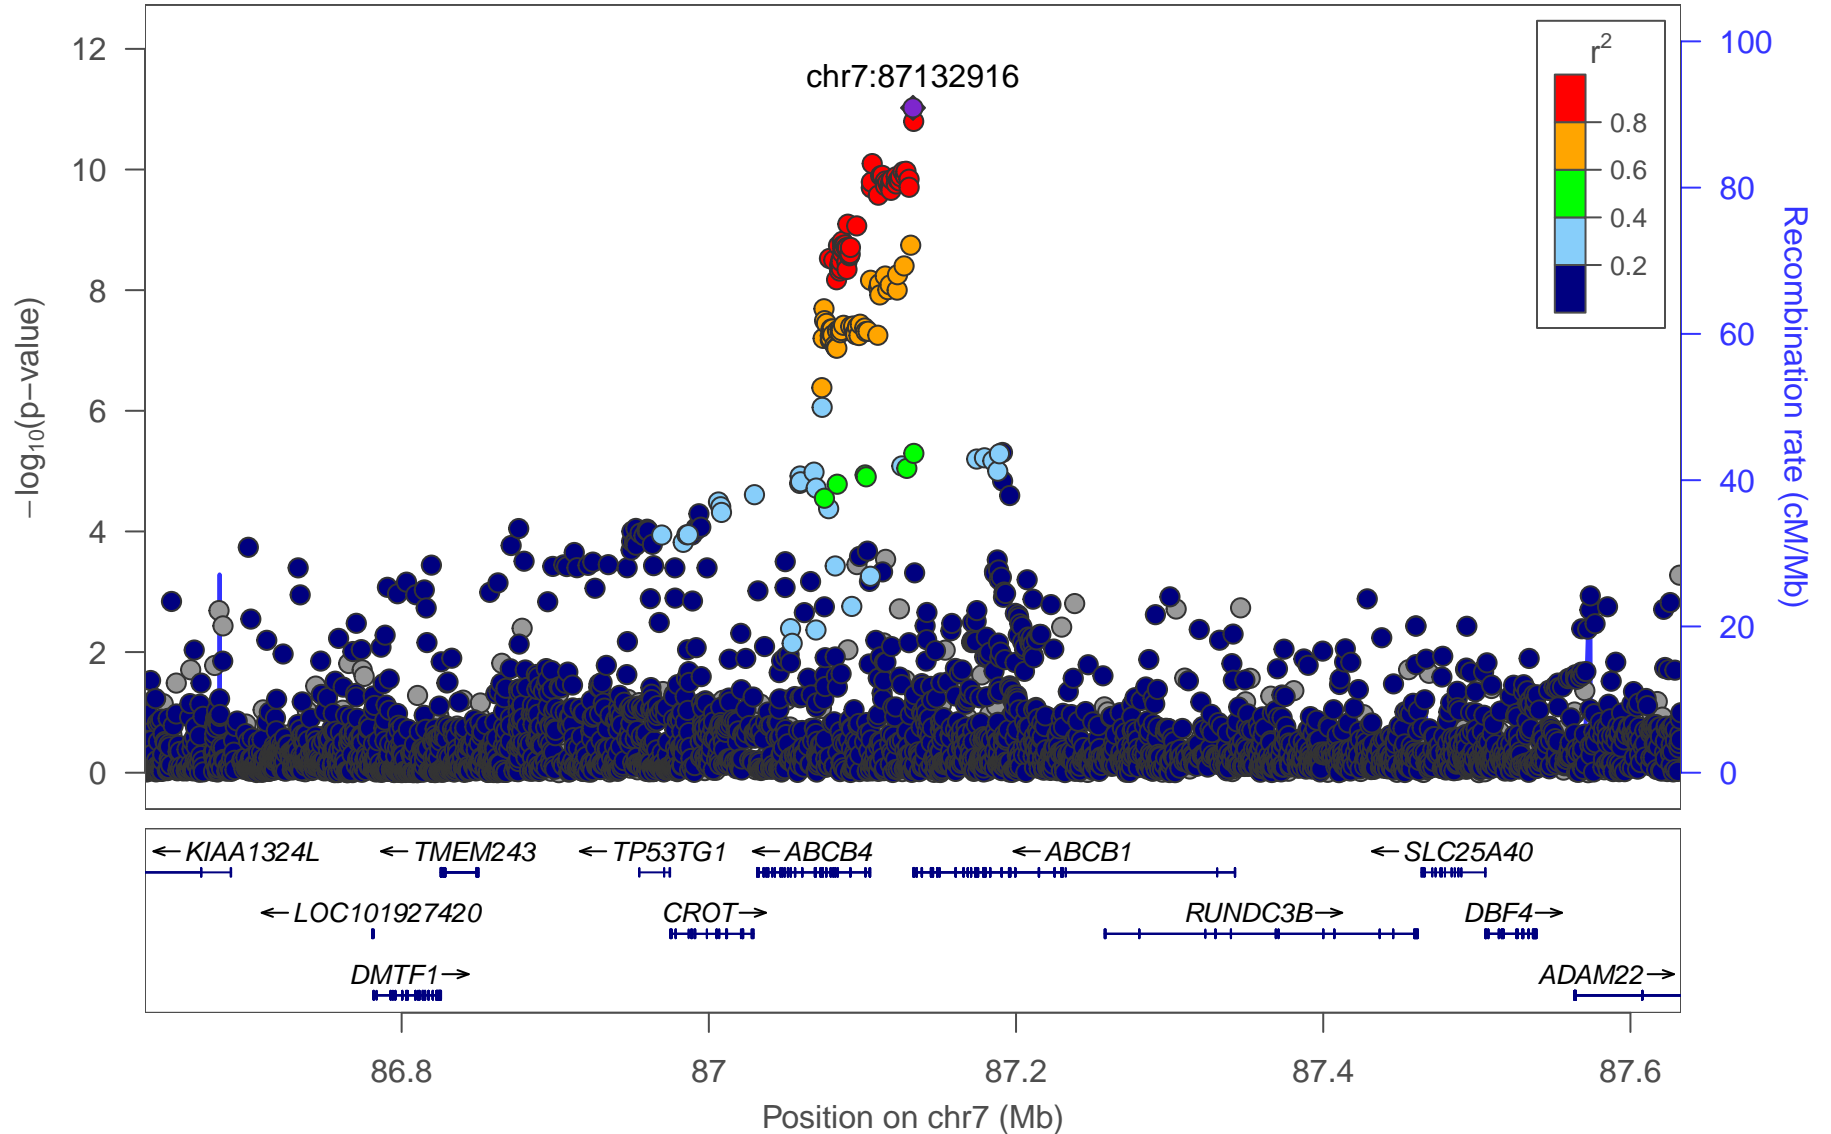

# 7\_15:HDL-D

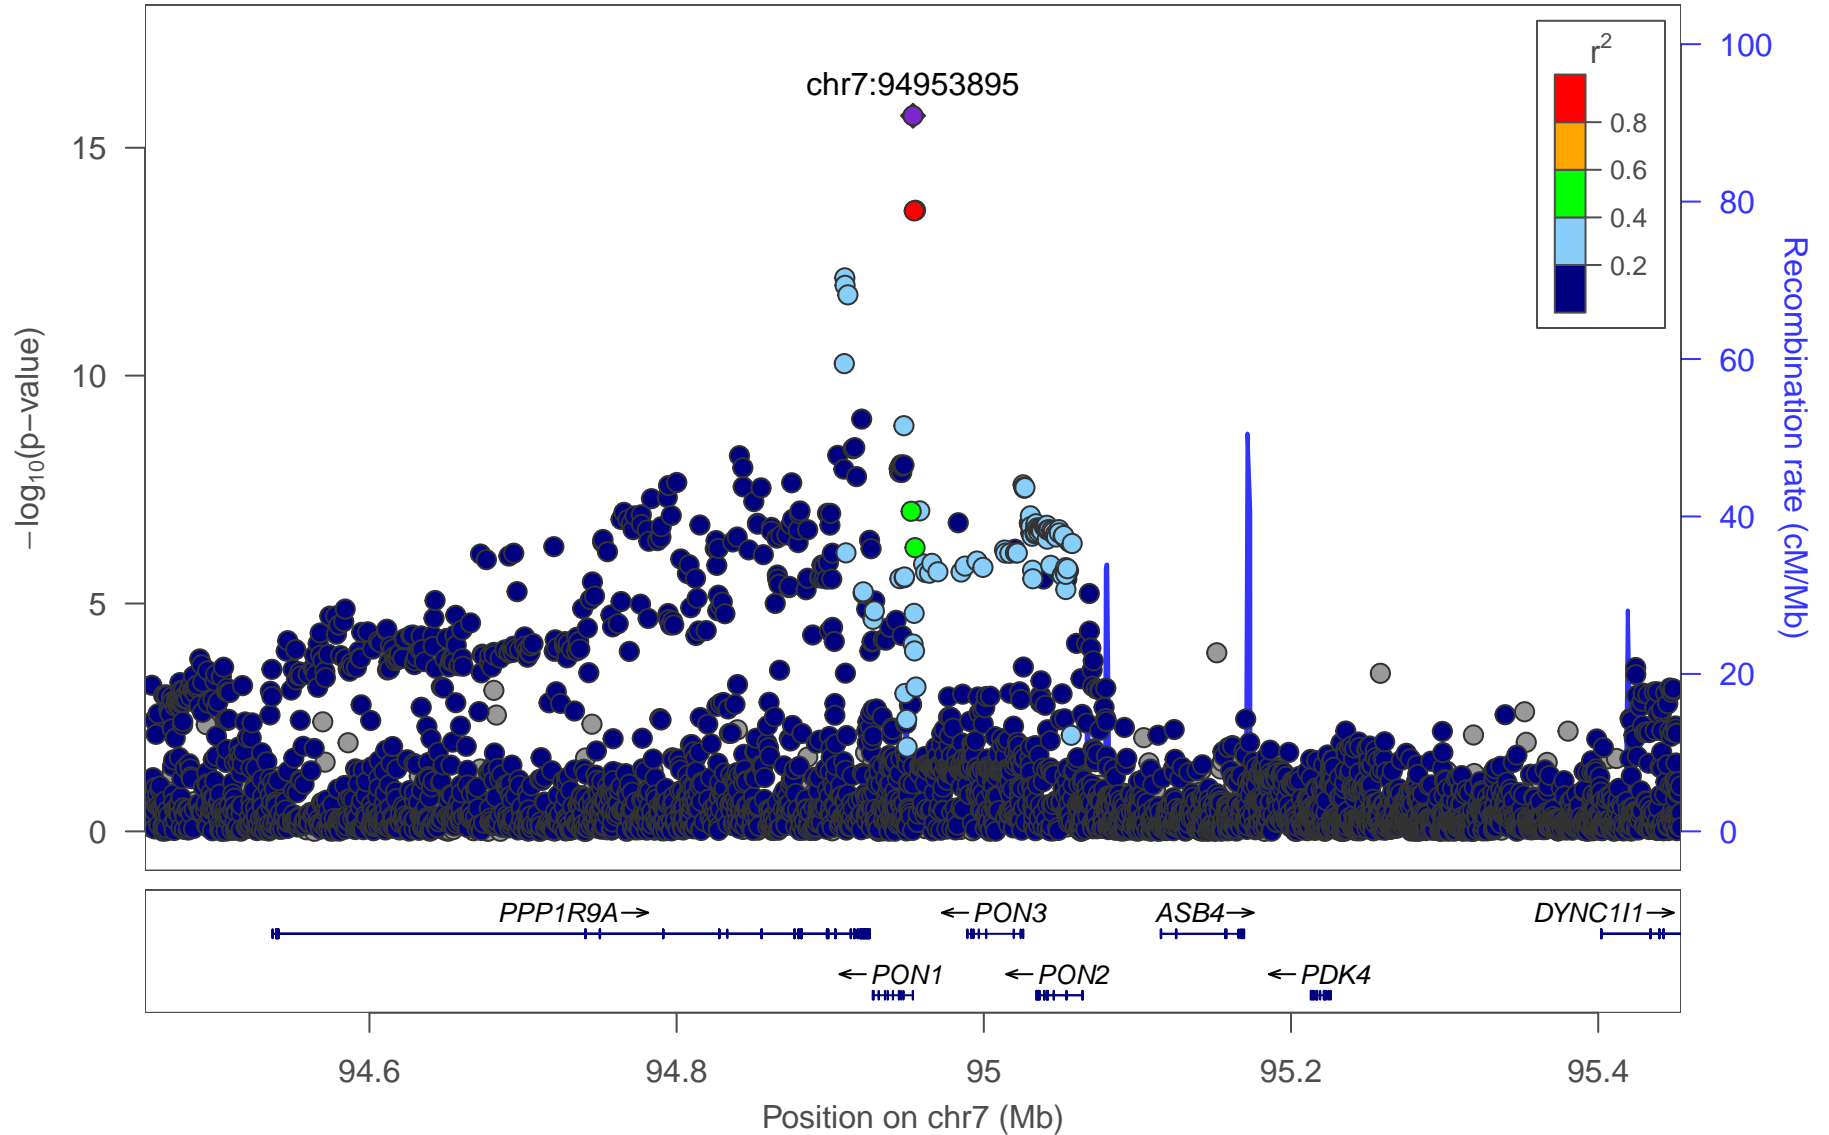

# 7\_16:ApoBbyApoA1

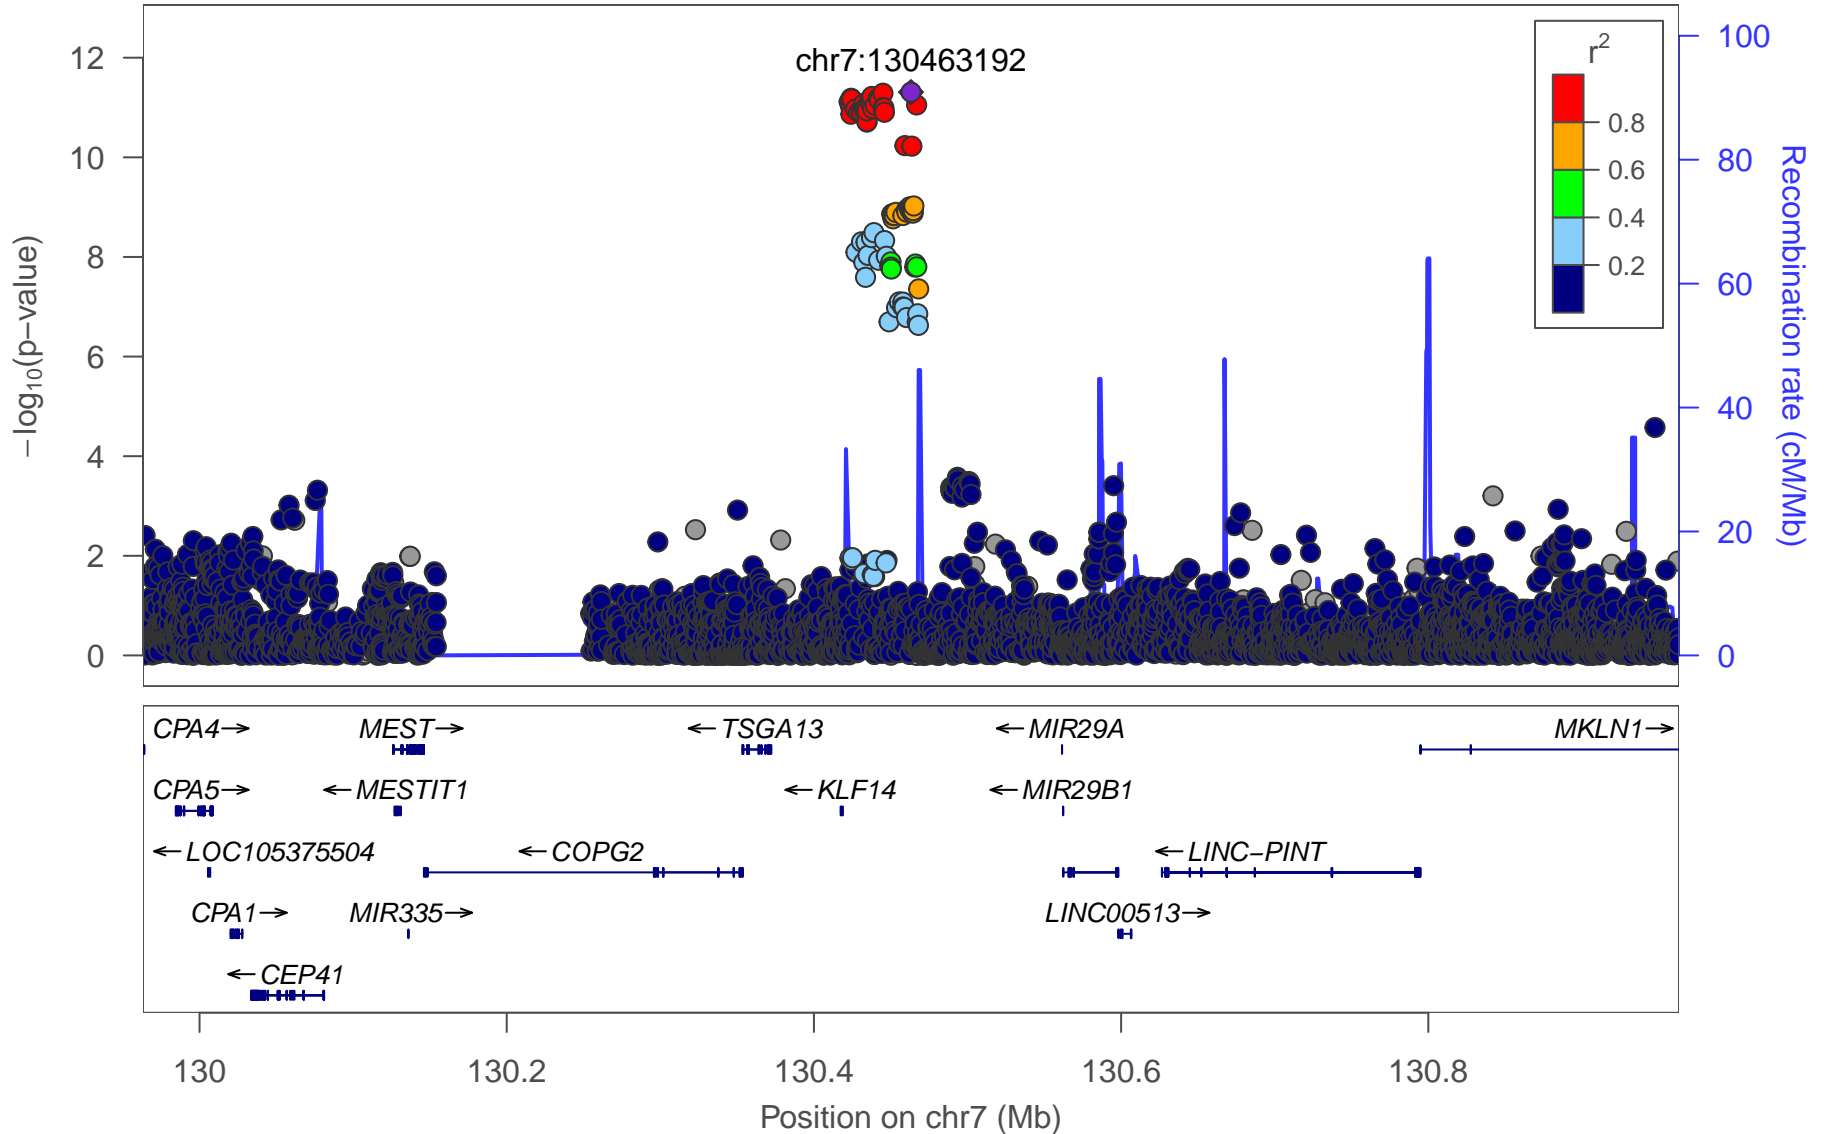

# 7\_17:L-HDL-PL

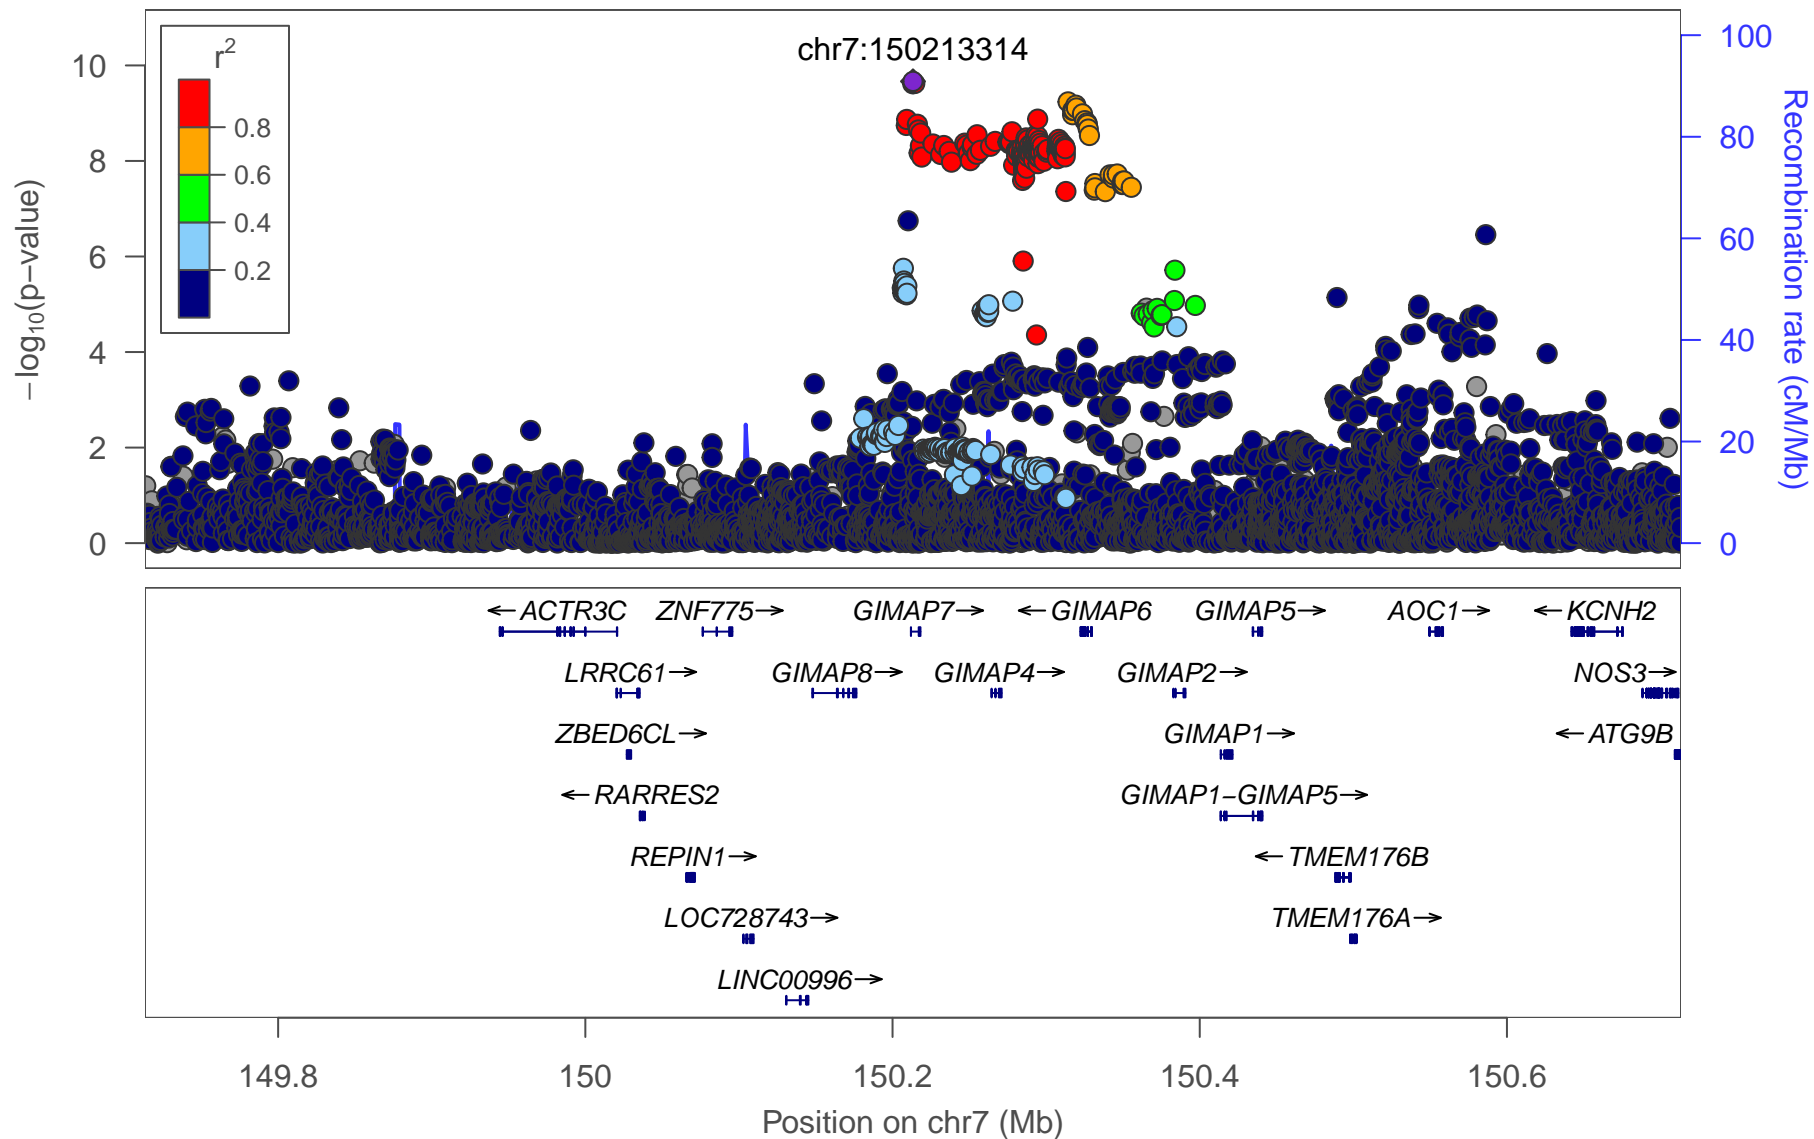



# 7\_18:Crea

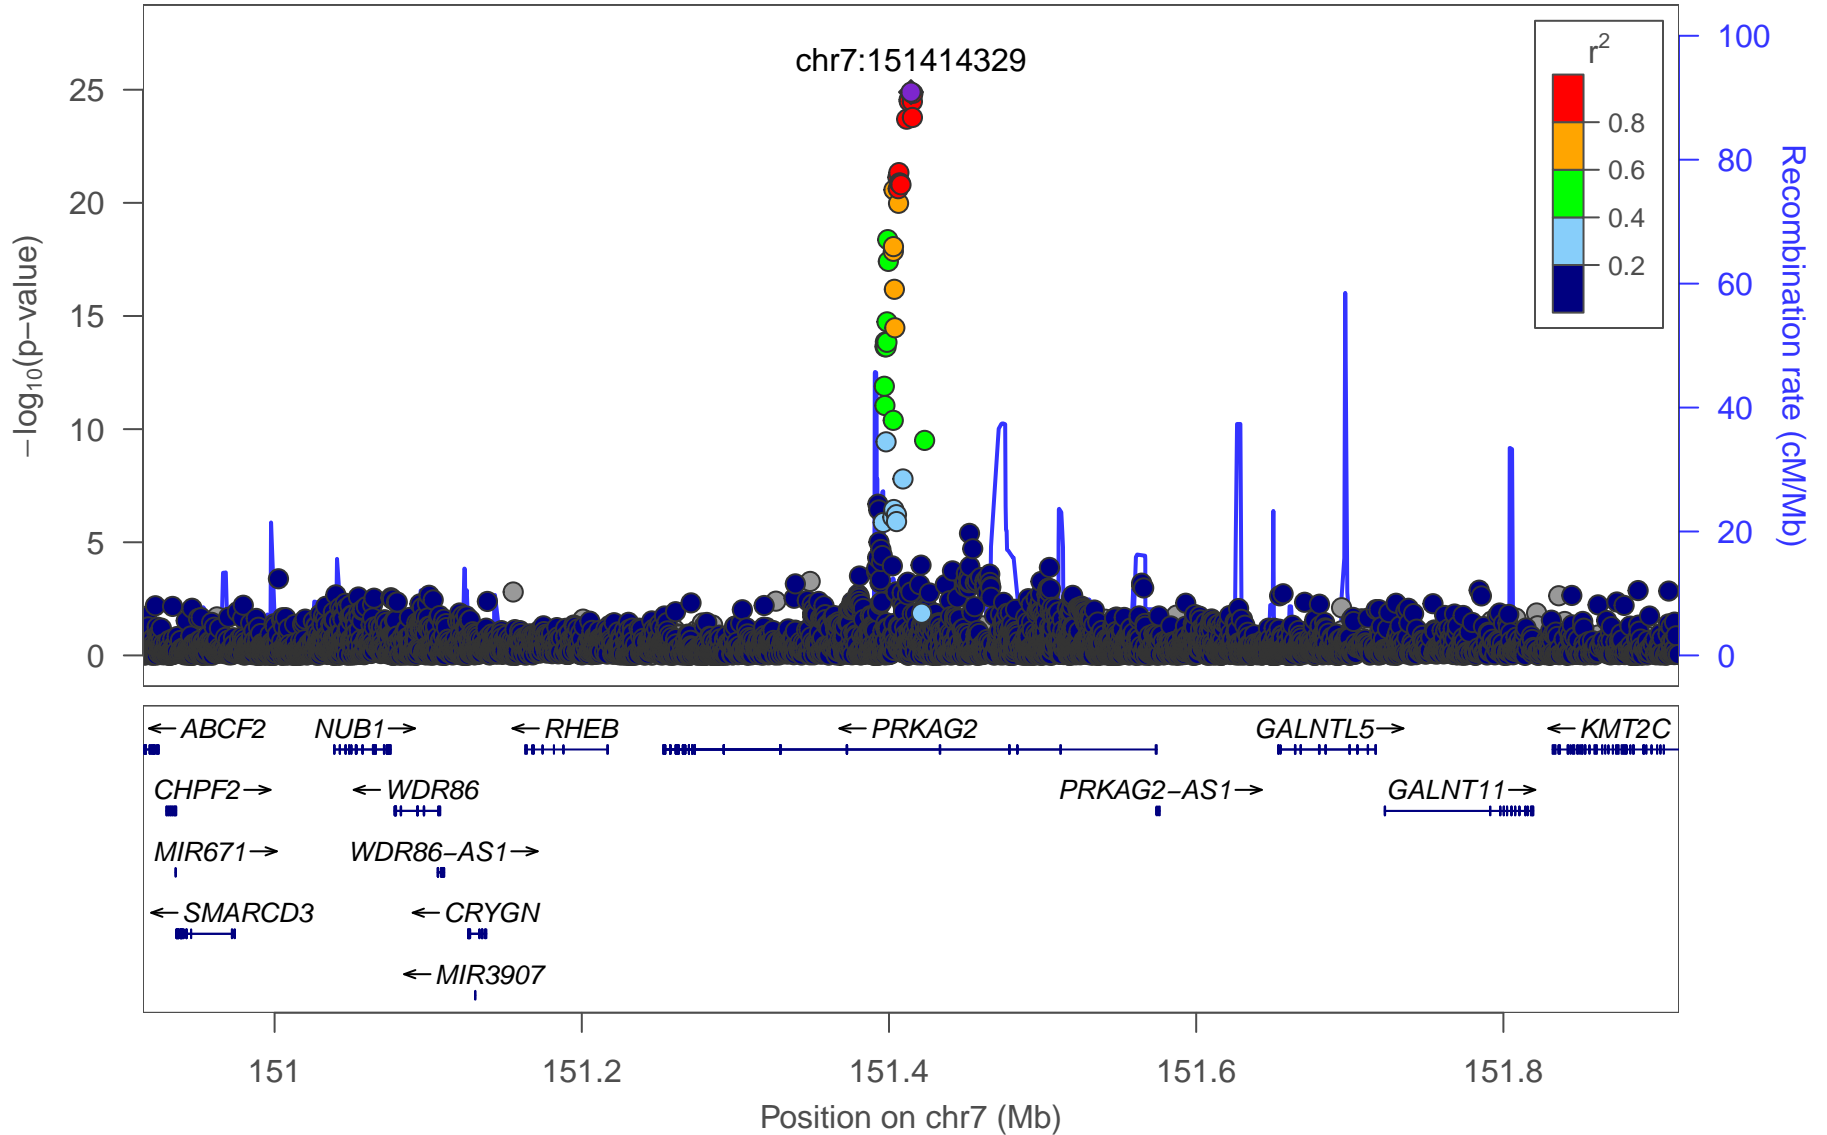

# 7\_19:DHA

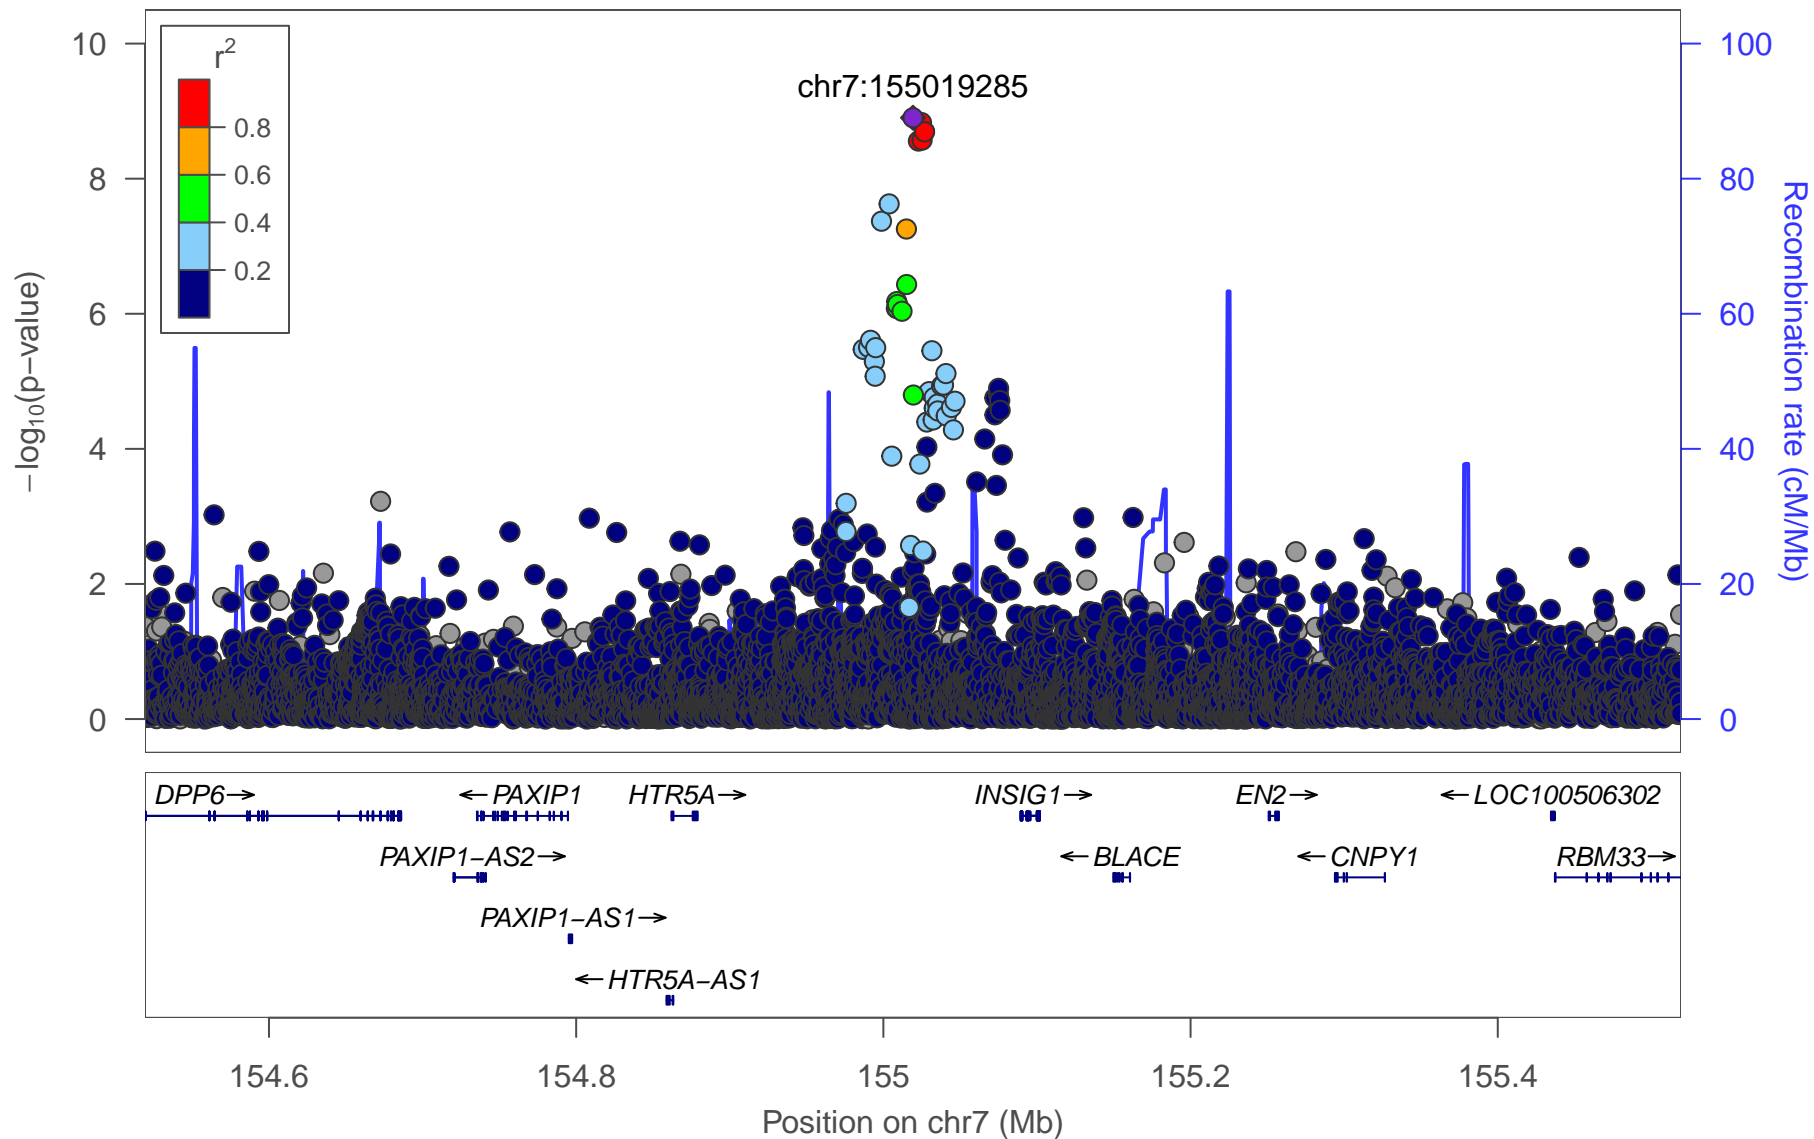

# 8\_1:Gly

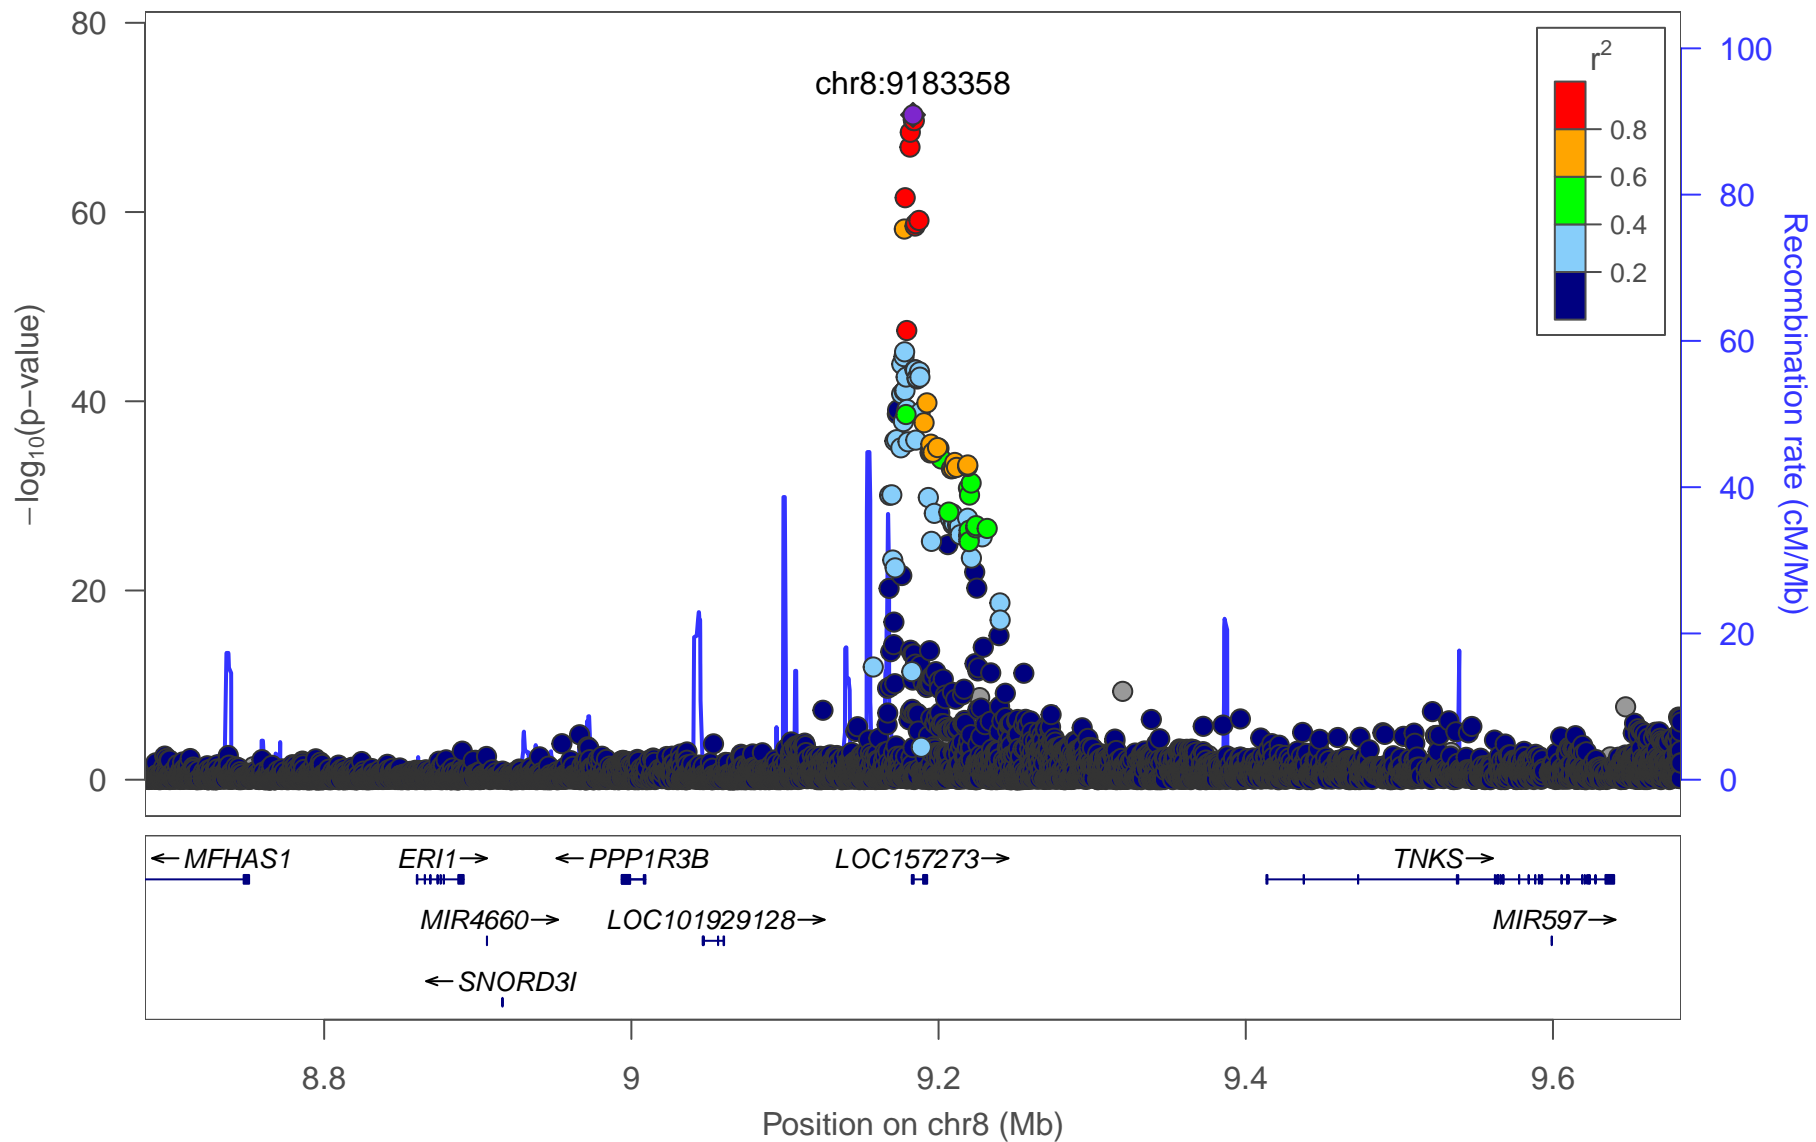

# 8\_2:S-VLDL-TG

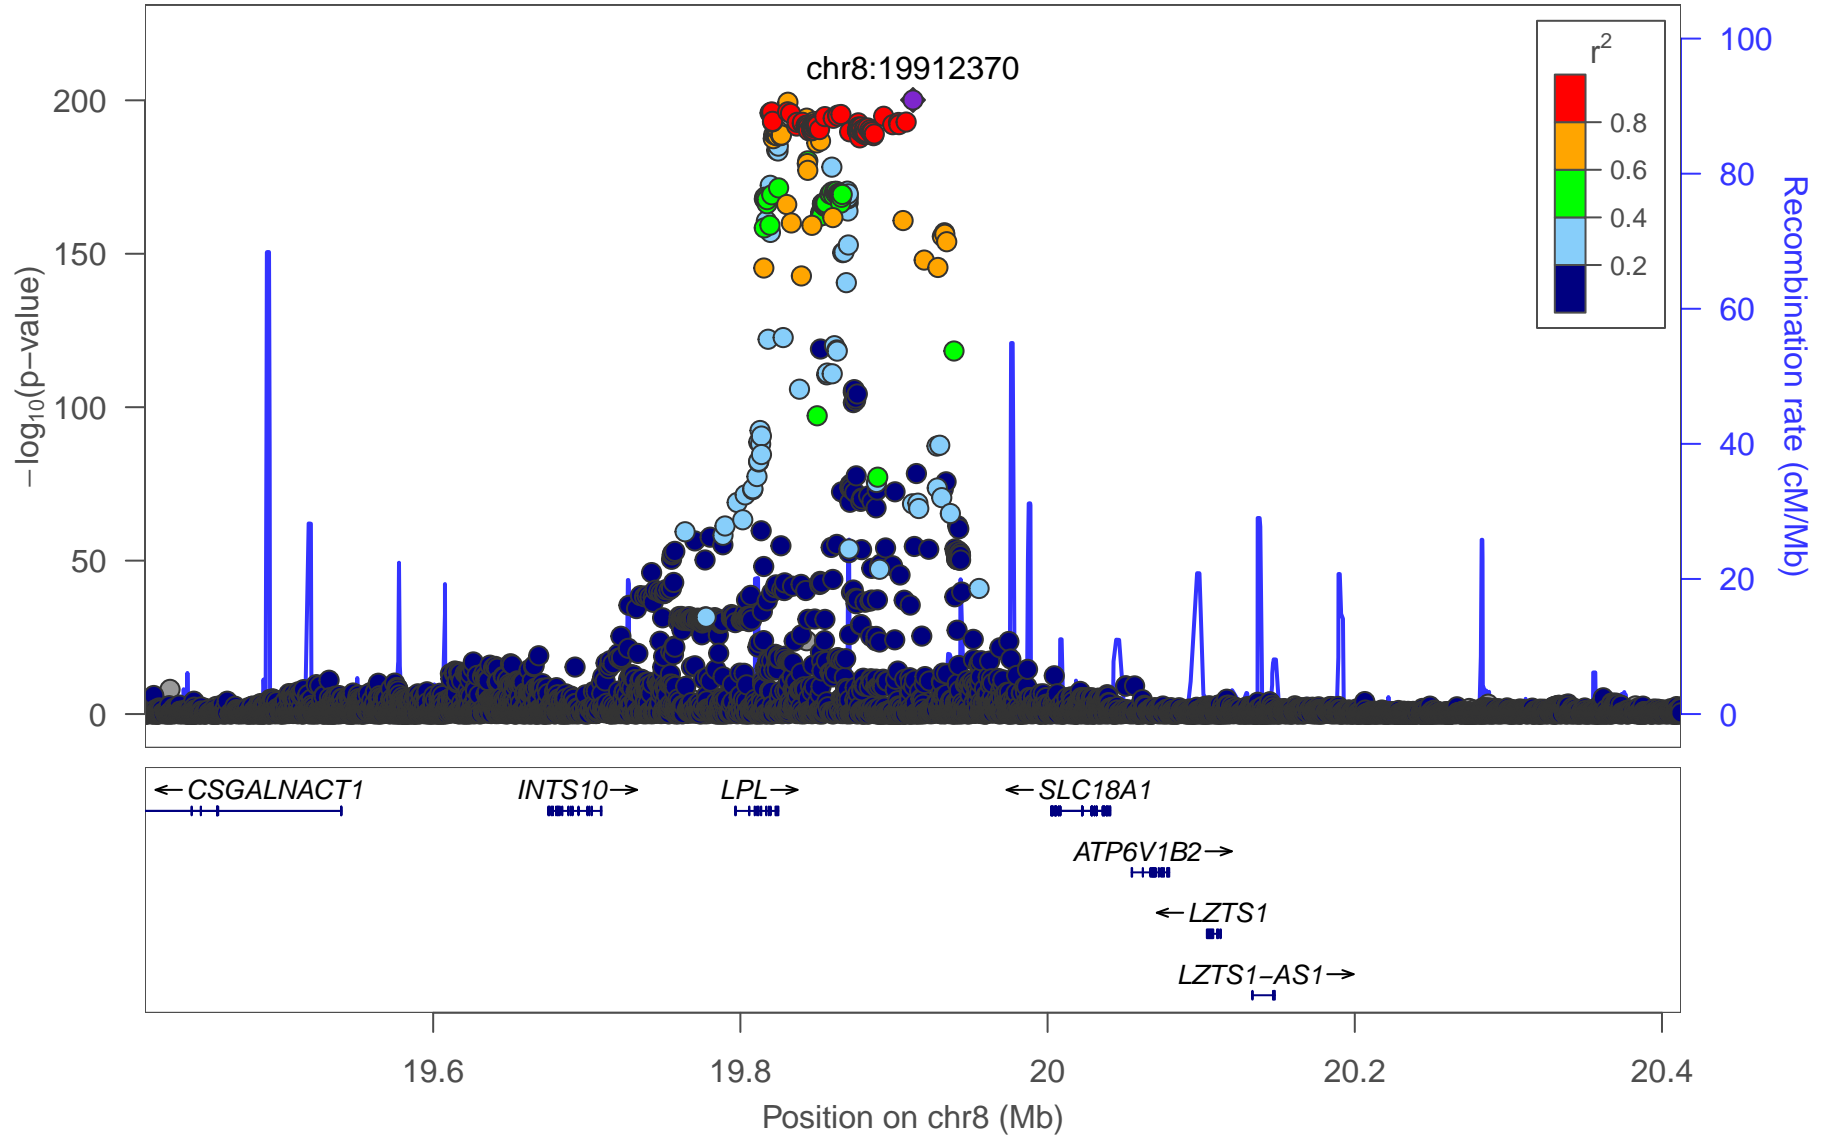

# 8\_3:Crea

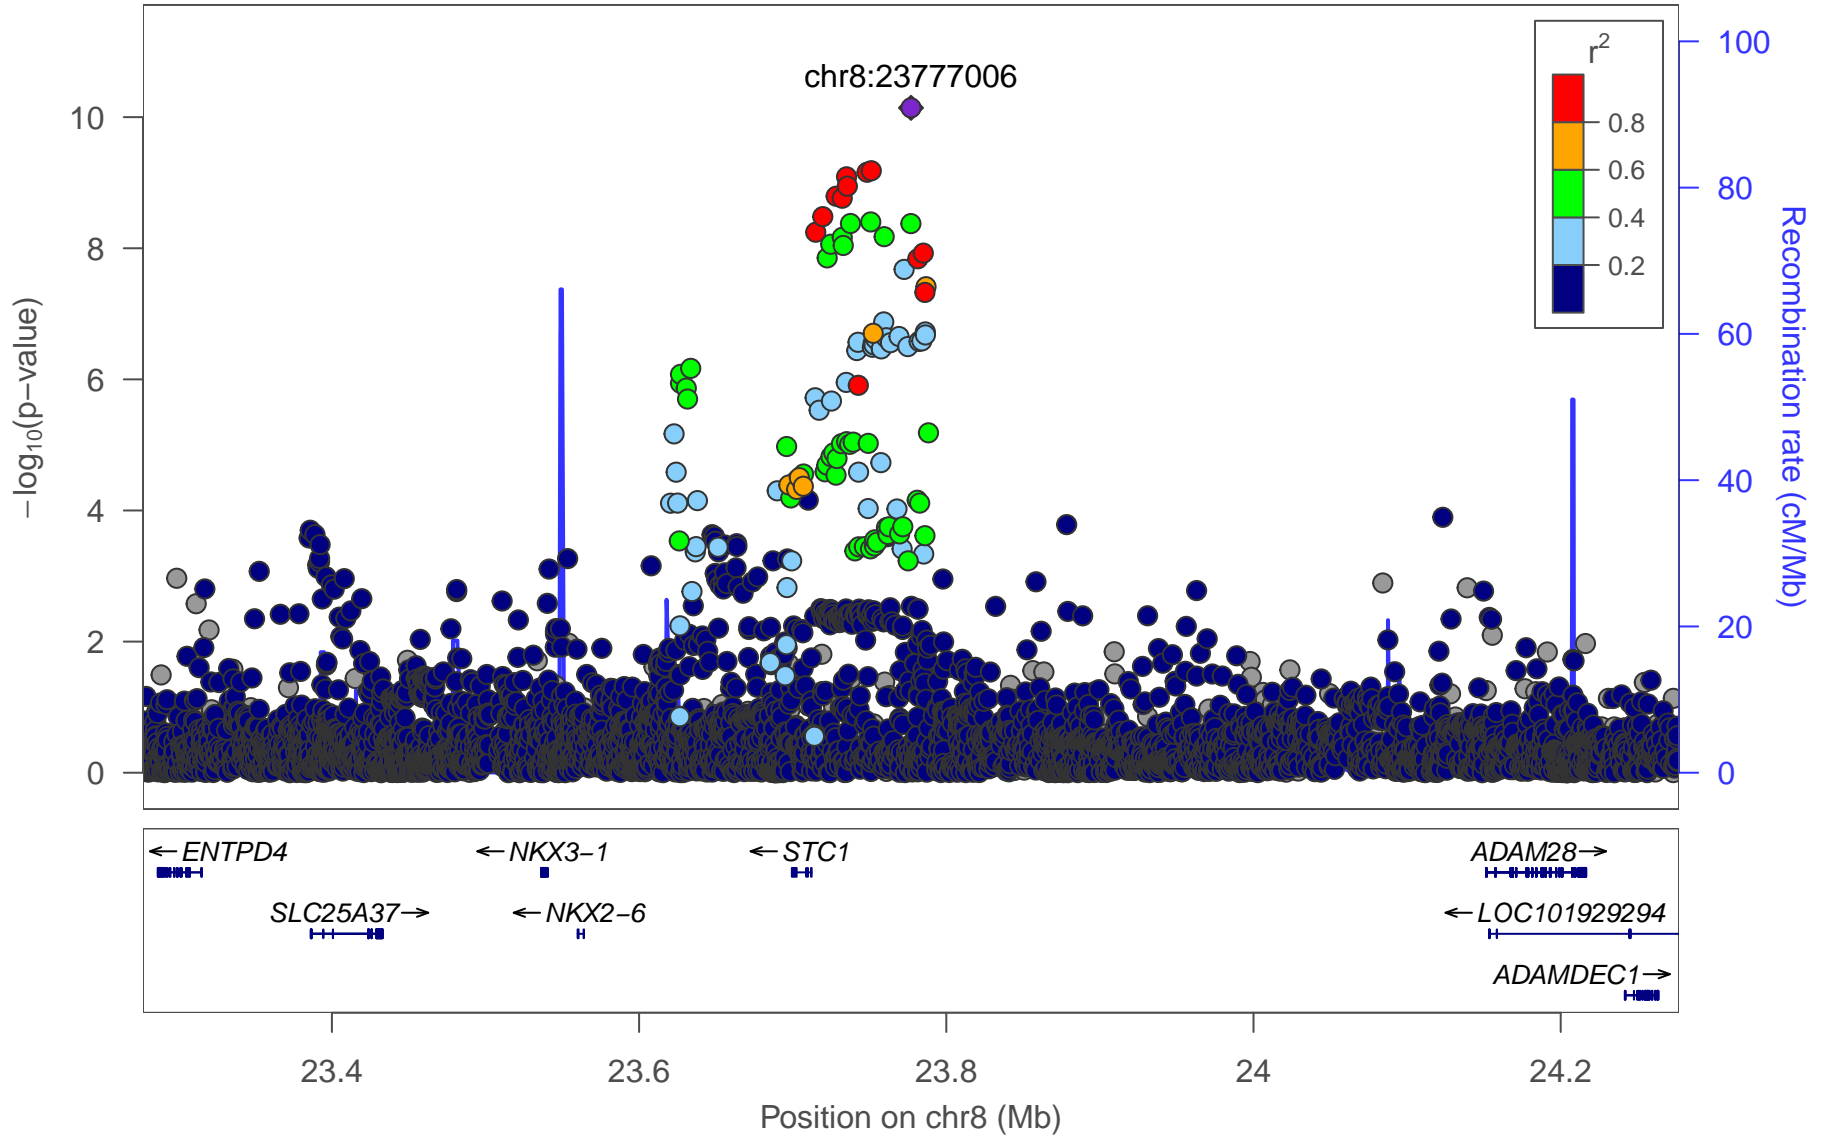

# 8\_4:Ala

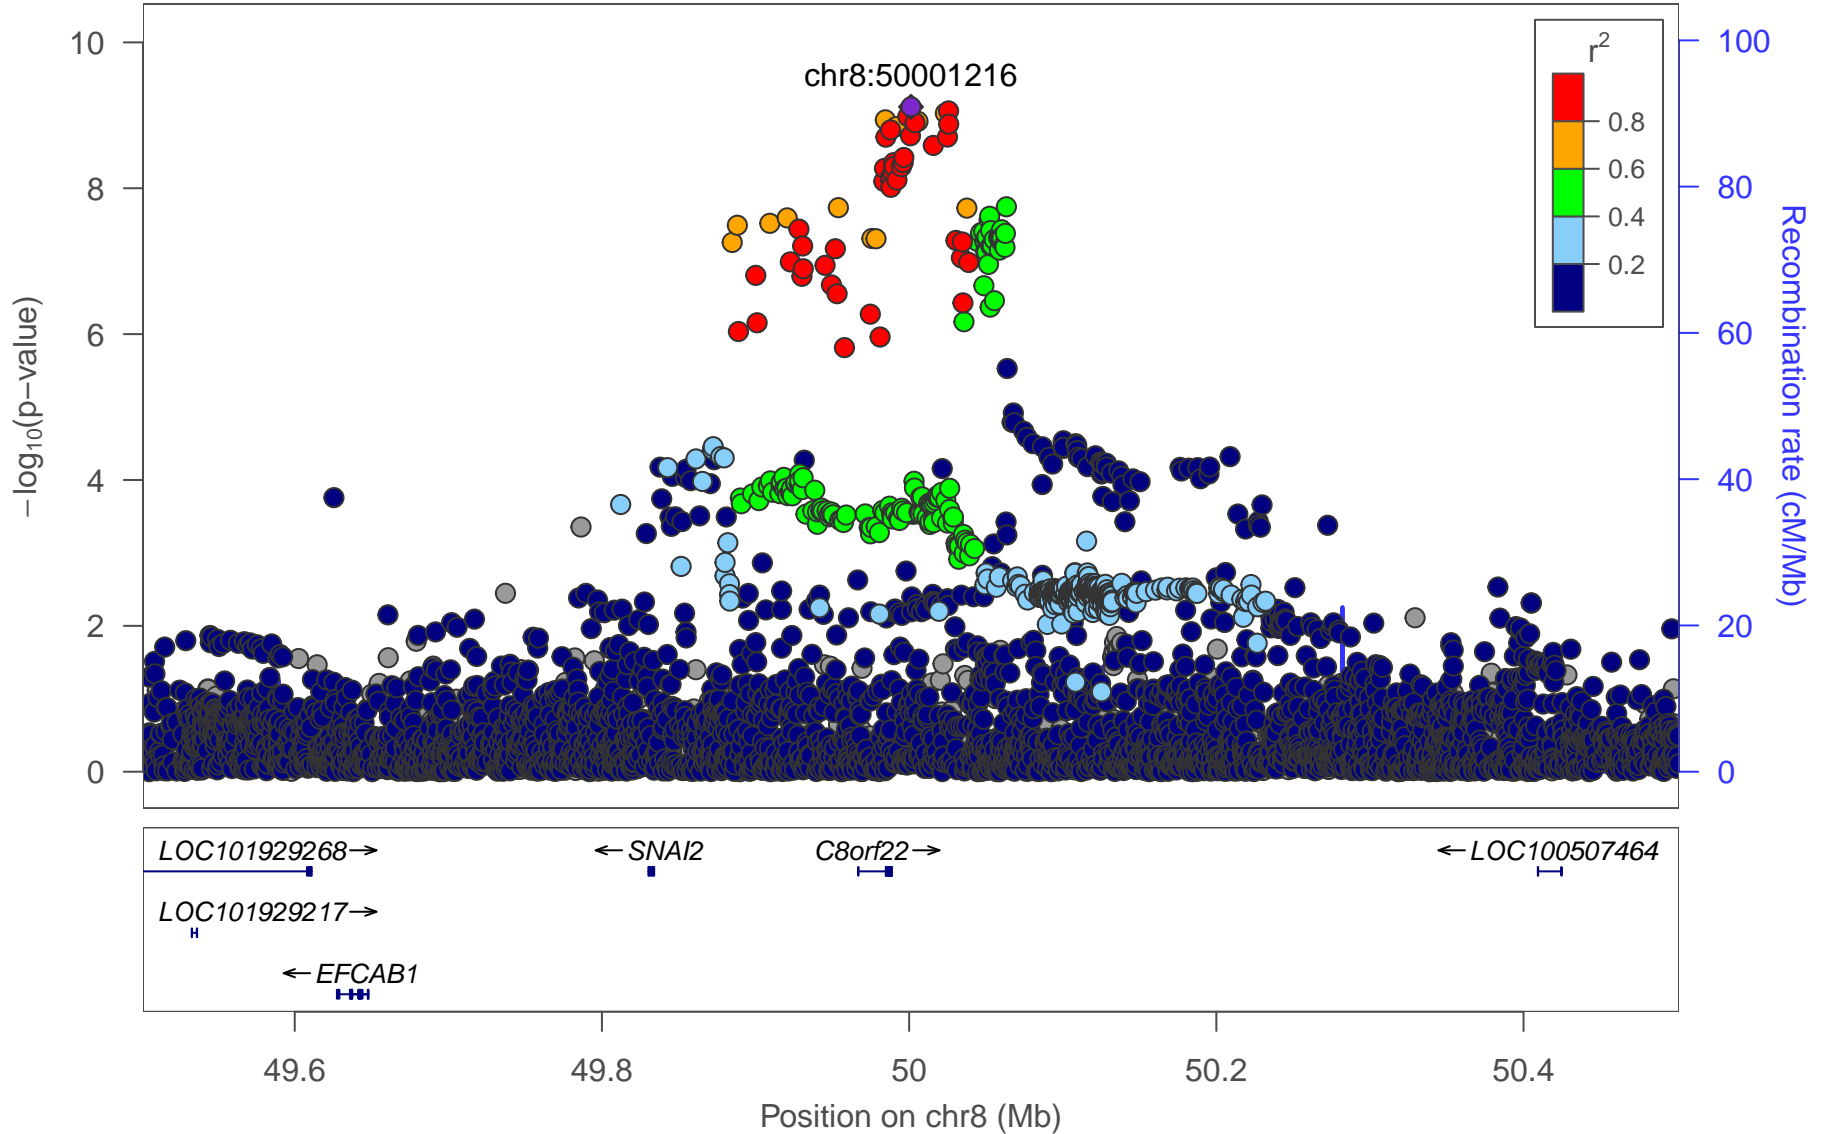

# 8\_5:PUFA

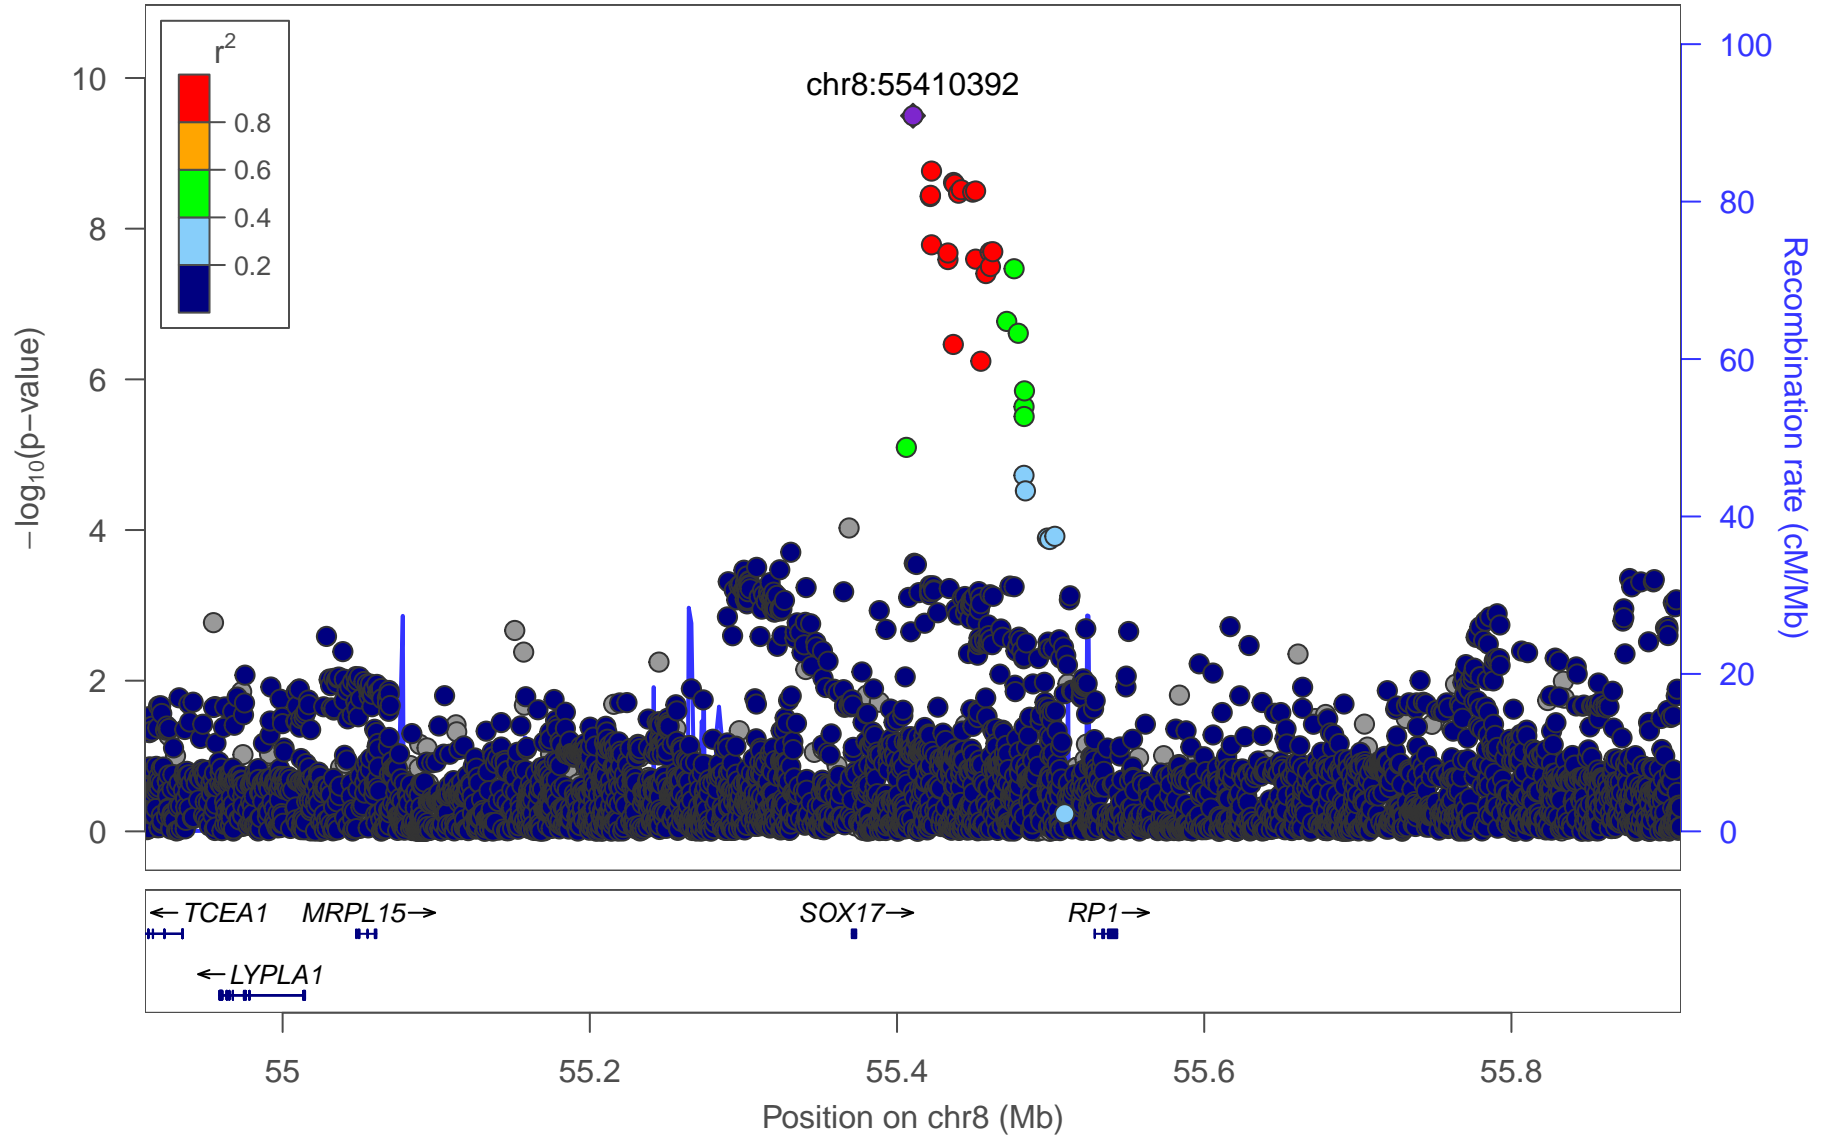

# 8\_6:XL-HDL-TG

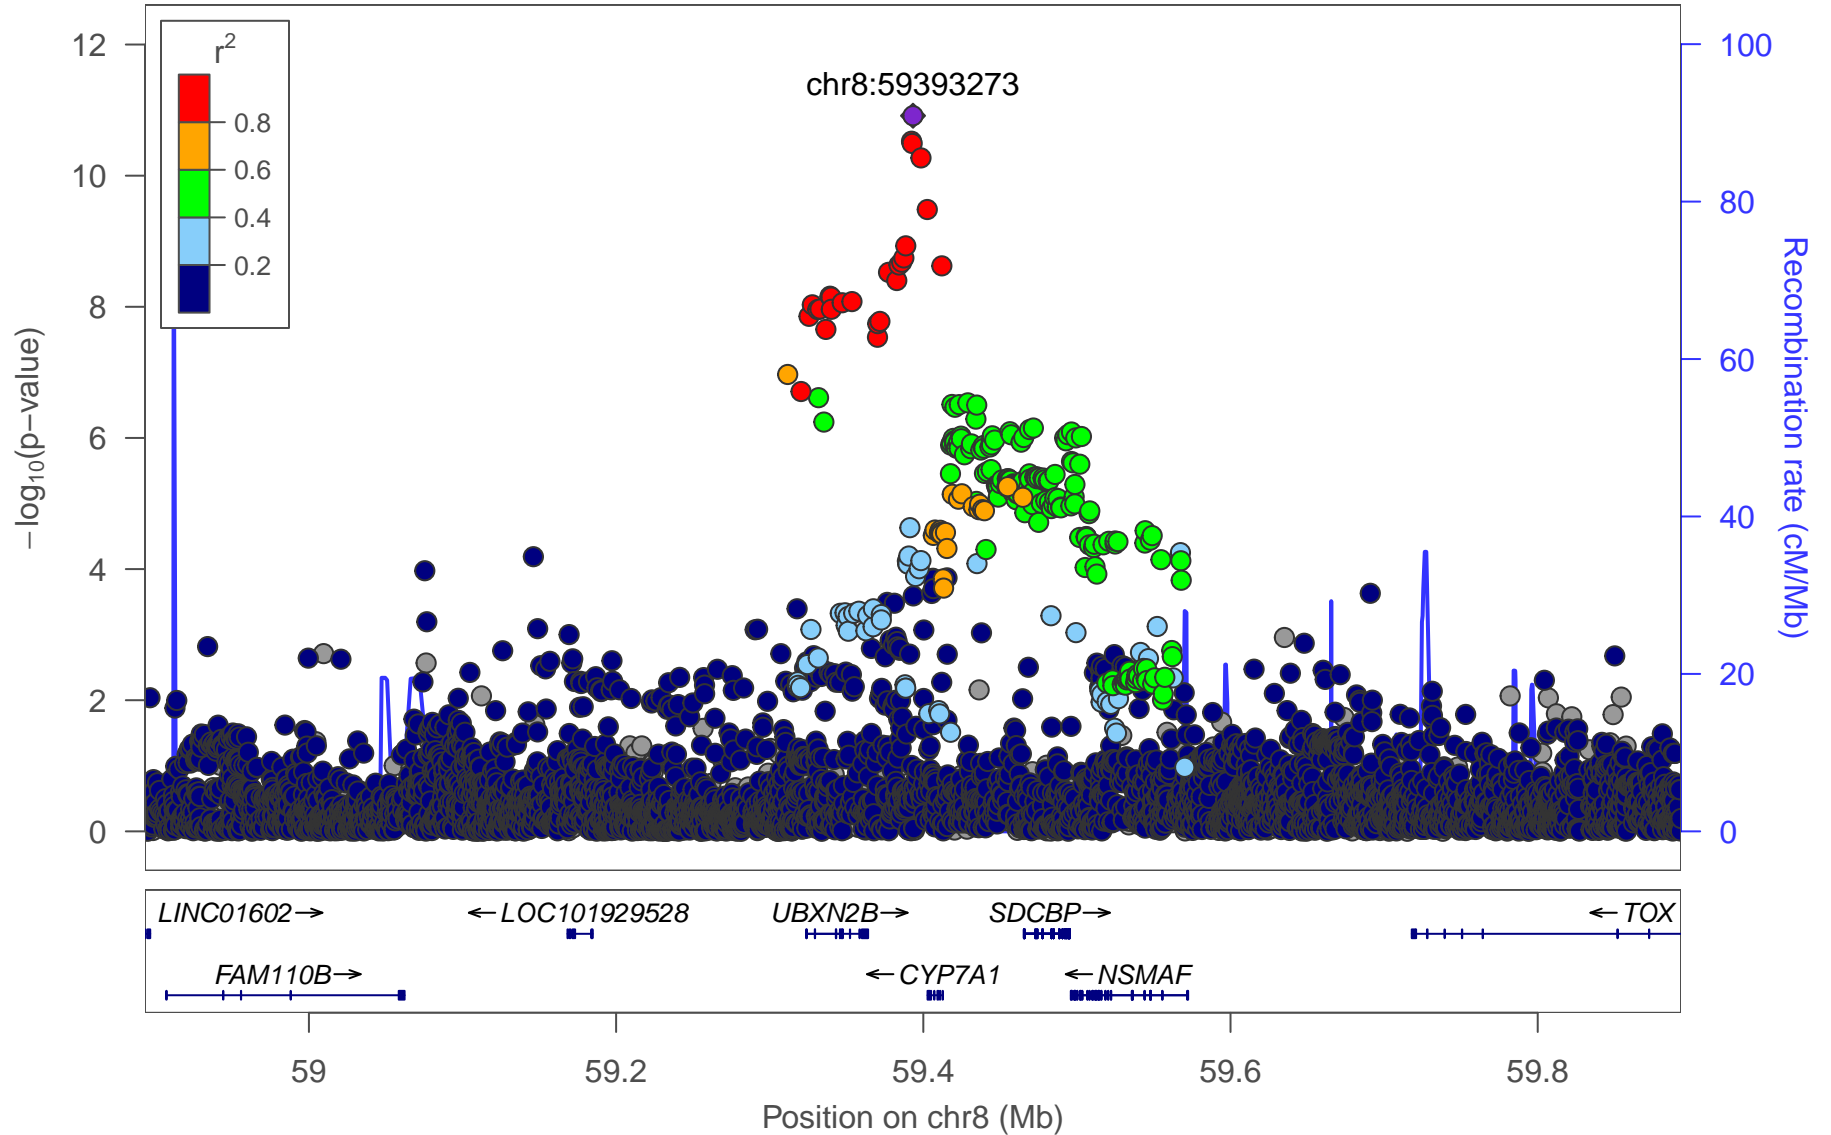



# 8\_7:XS-VLDL-PL

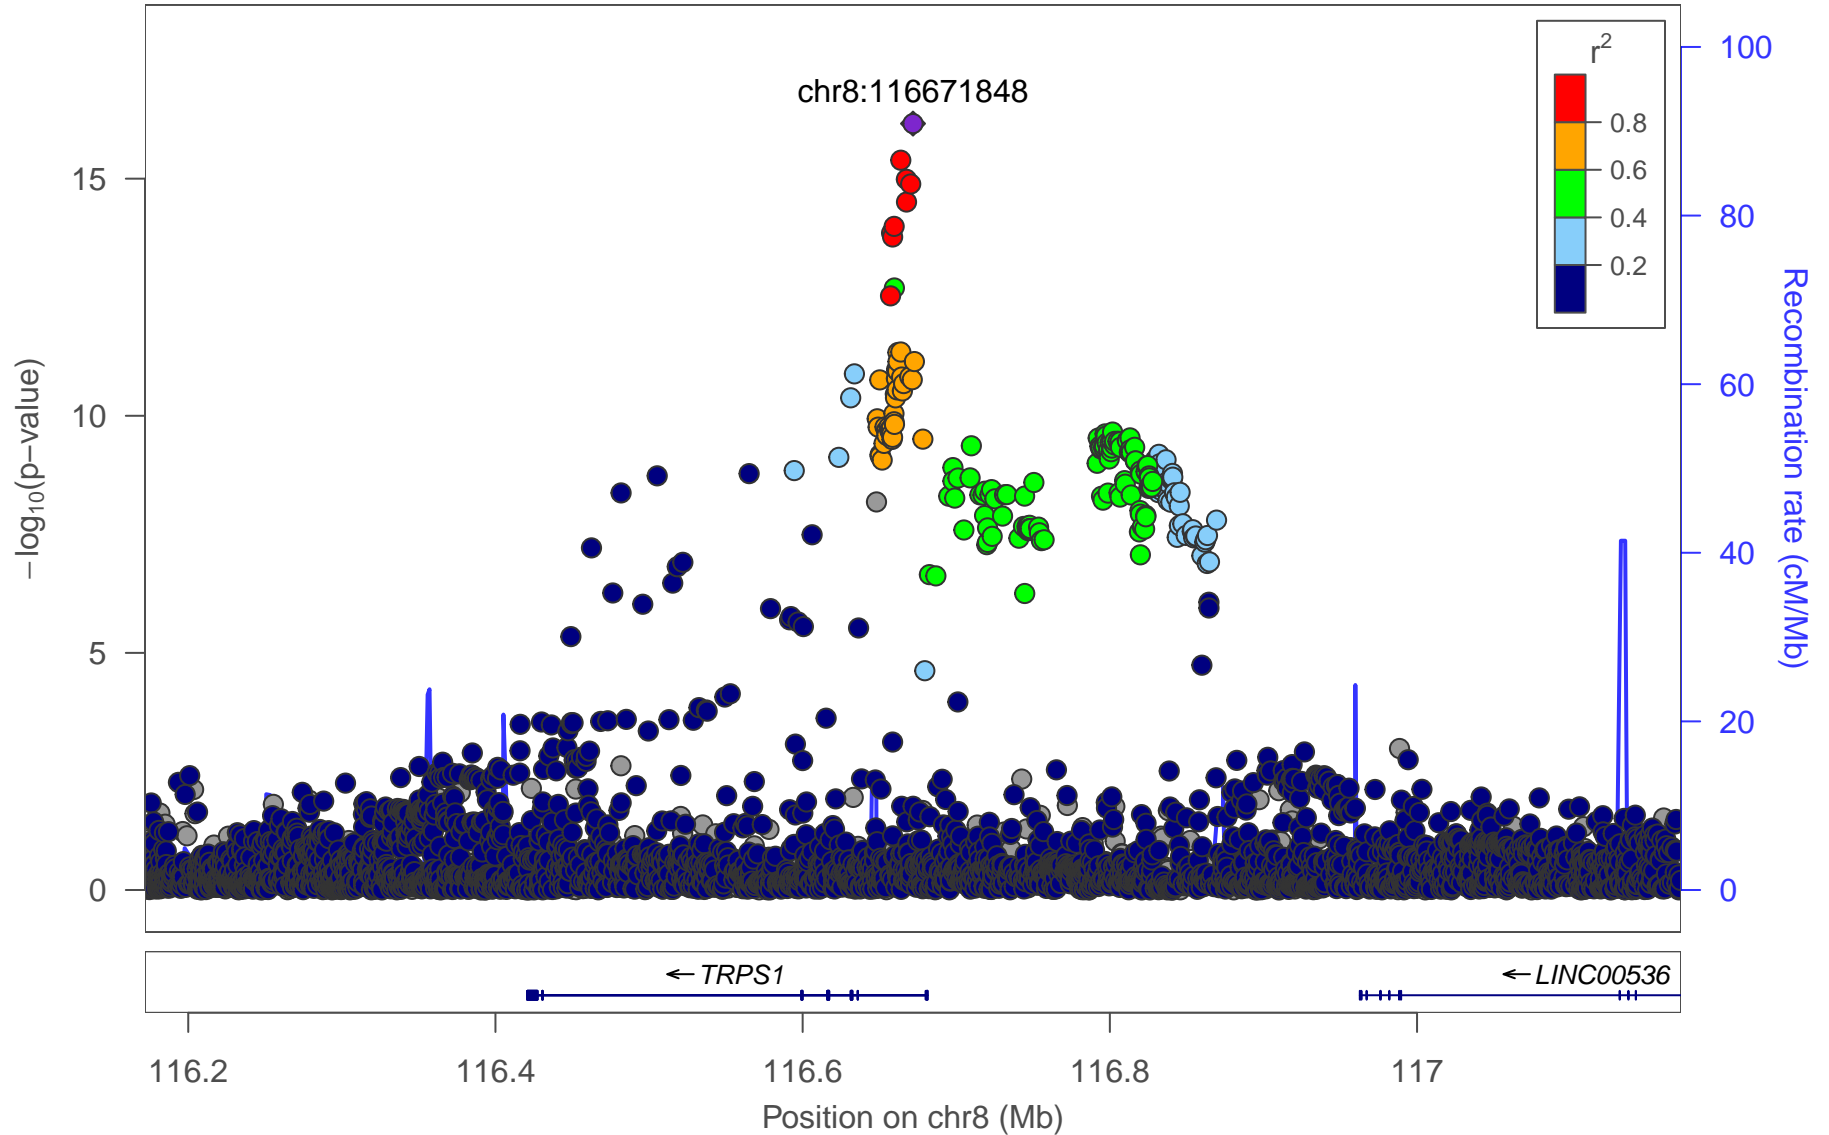

# 8\_8:Glc

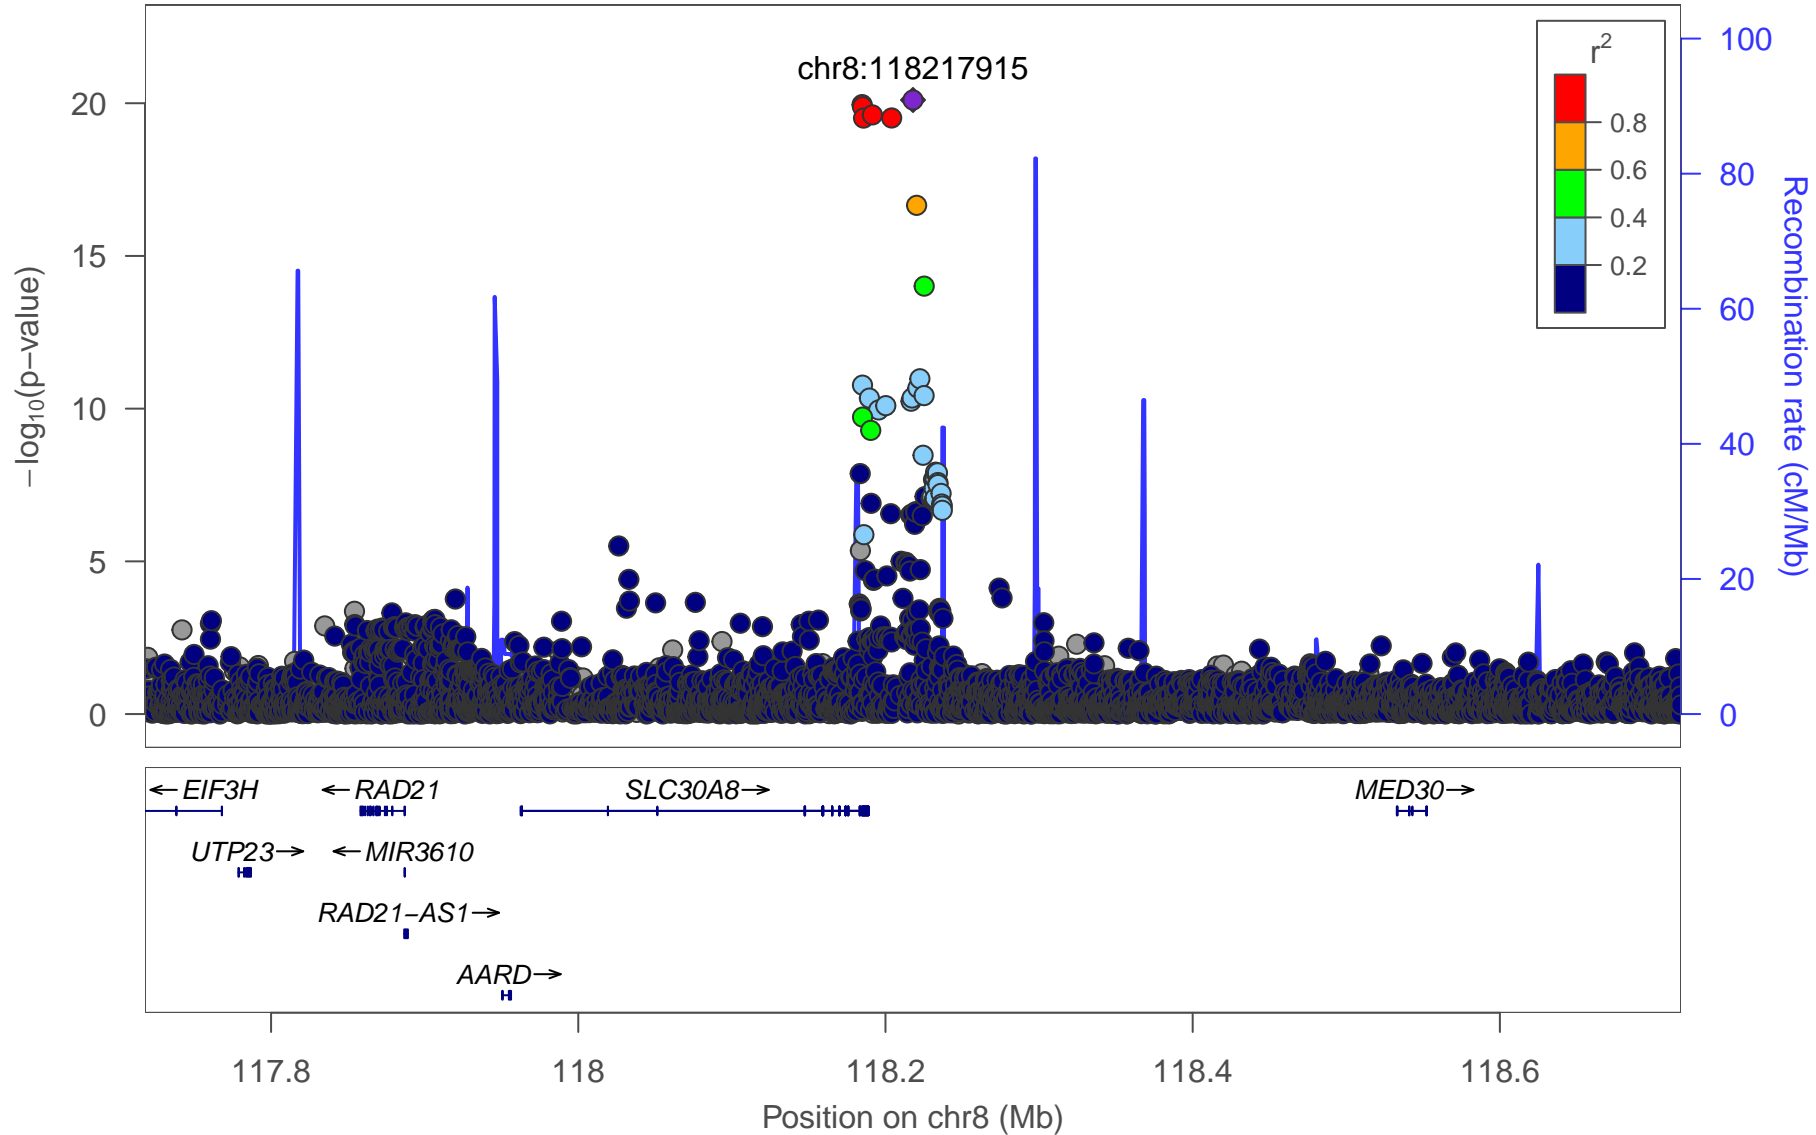

# 8\_9:S-VLDL-PL

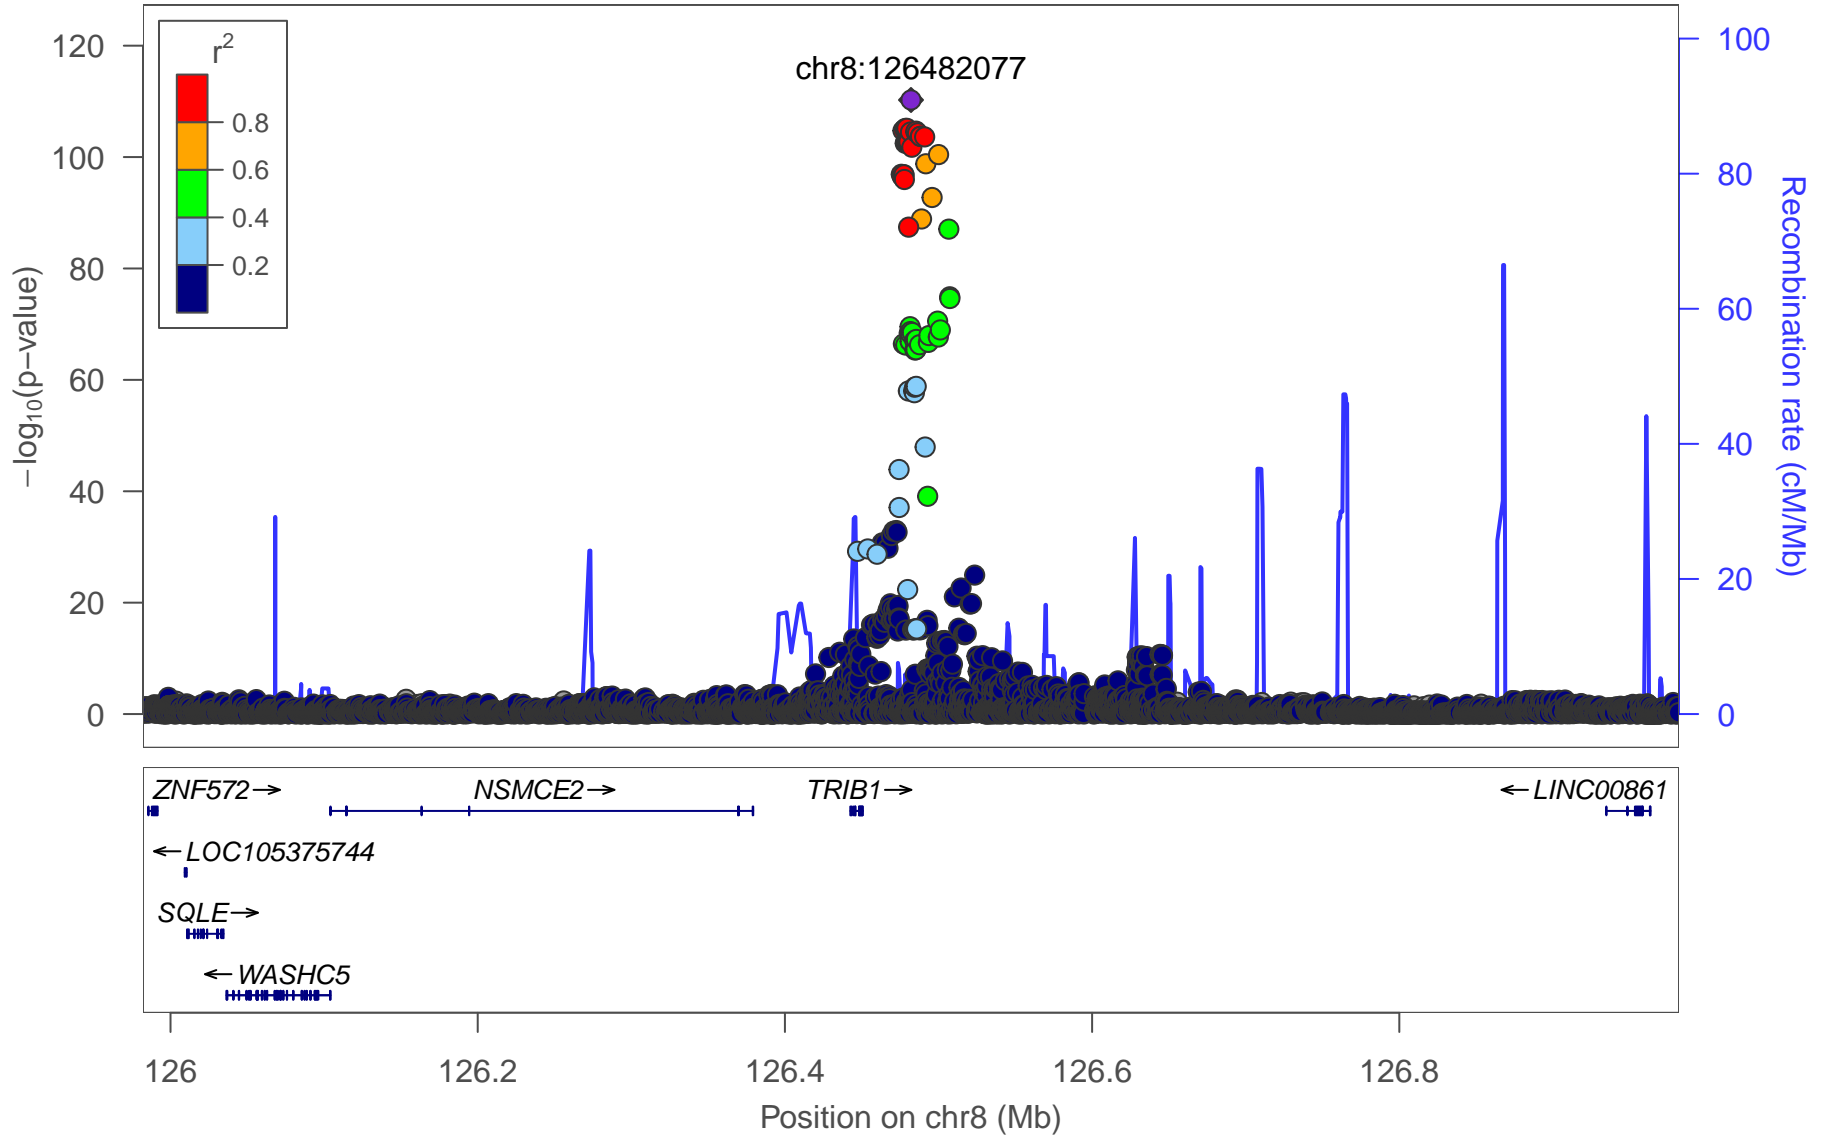

# 8\_10:His

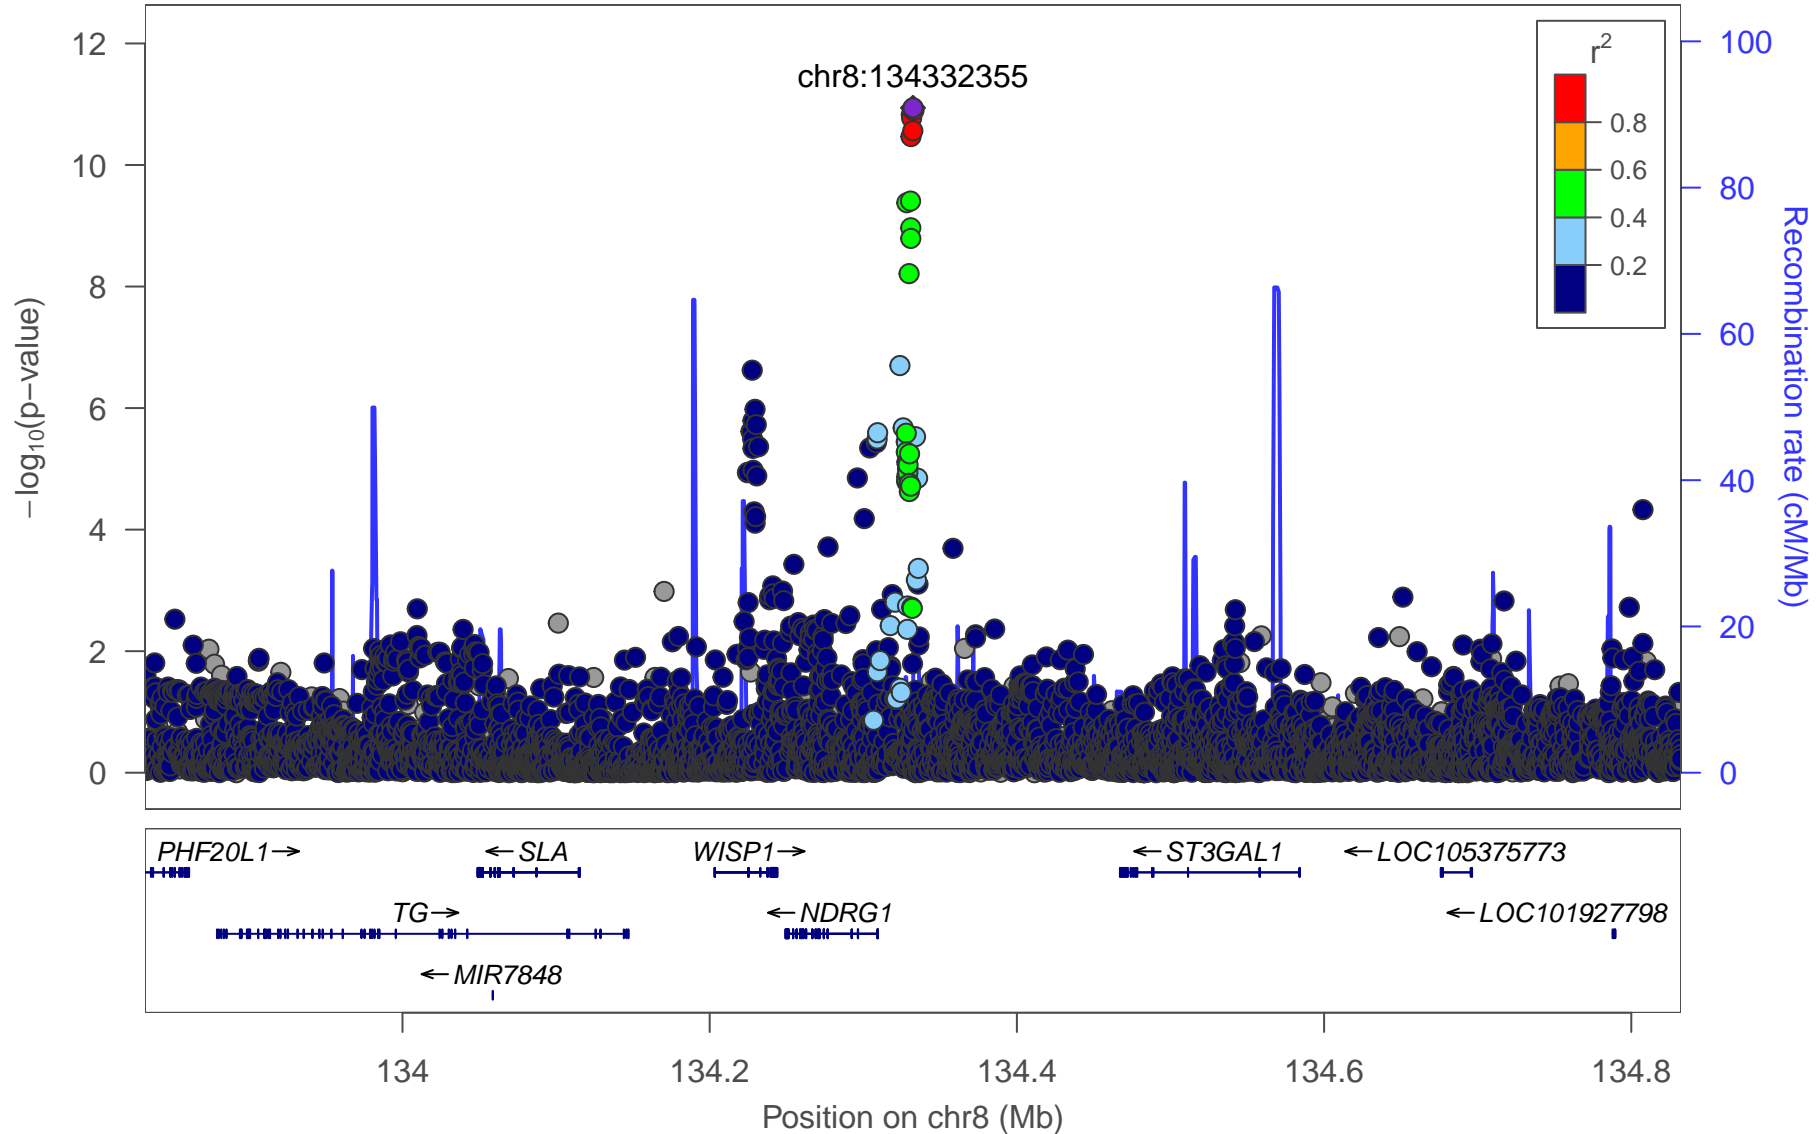

# 8\_11:His

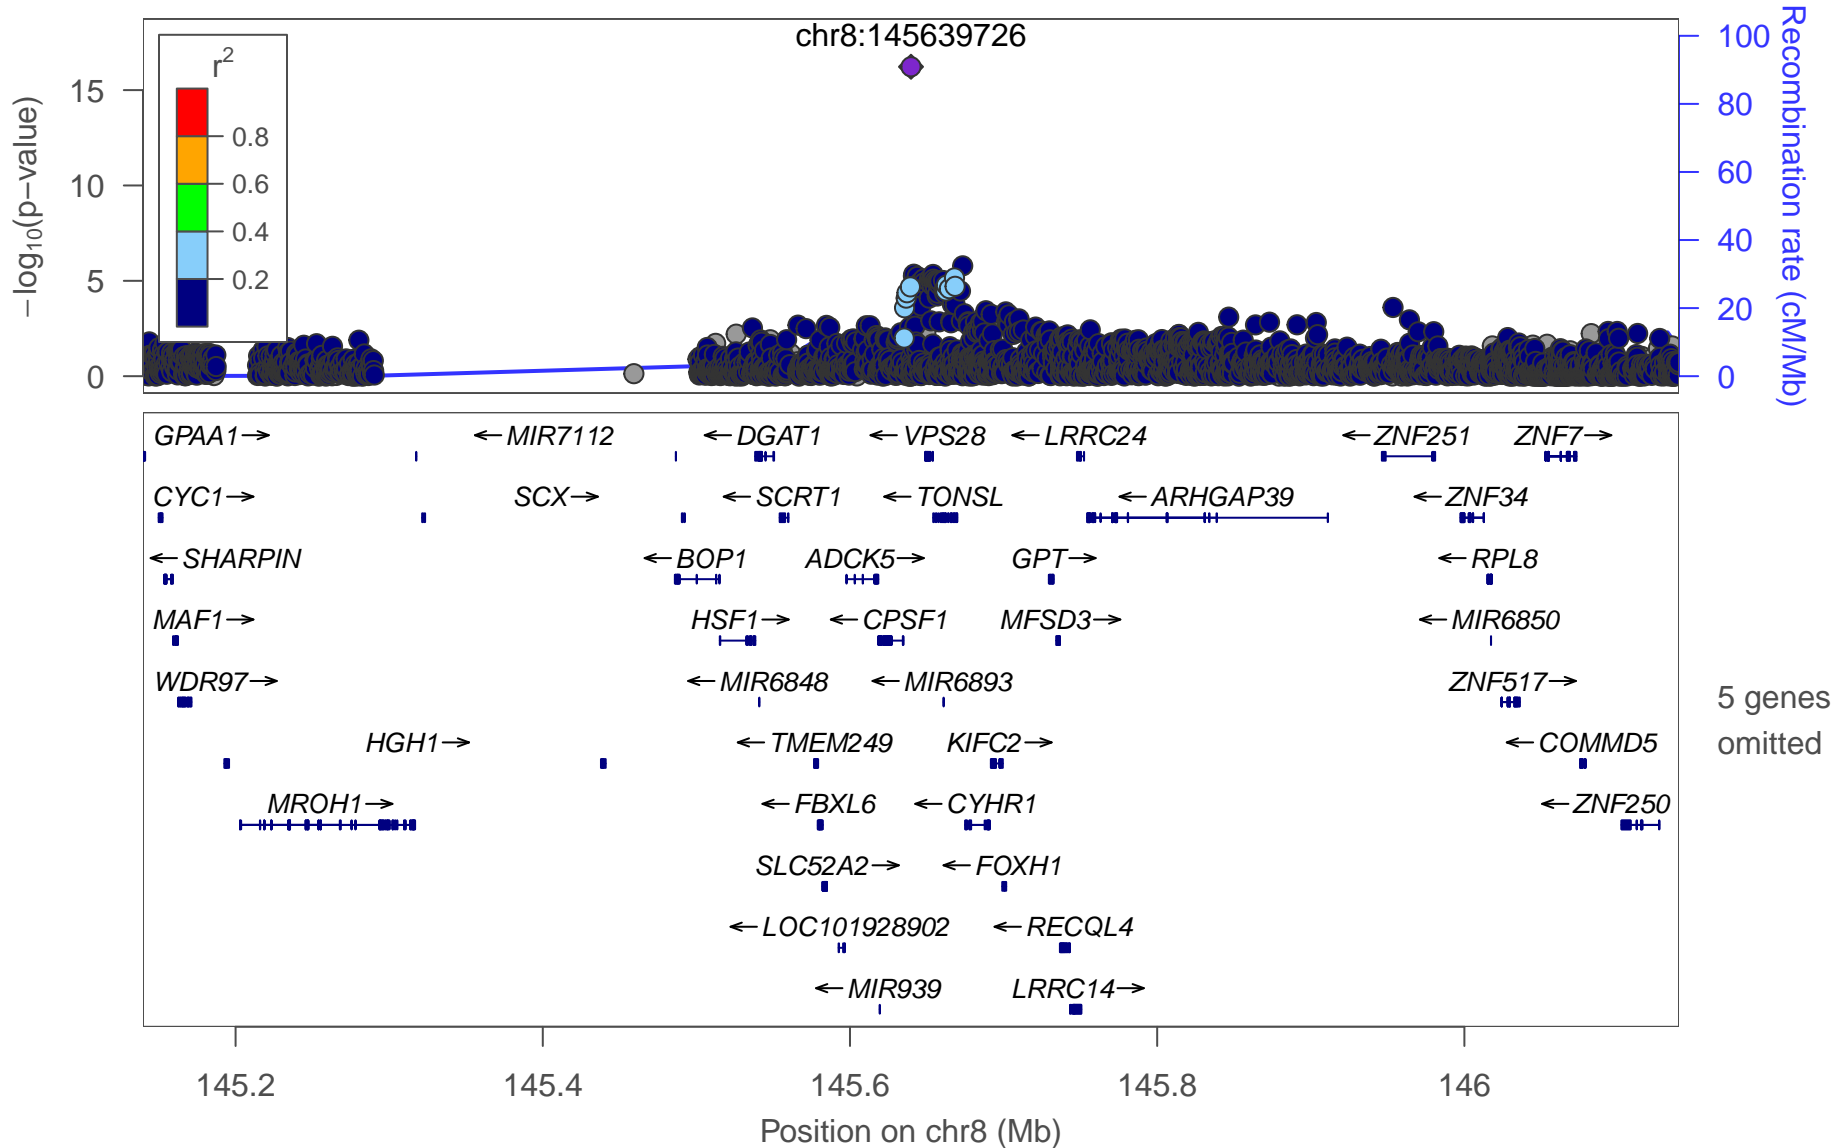

# 9\_1:Gly

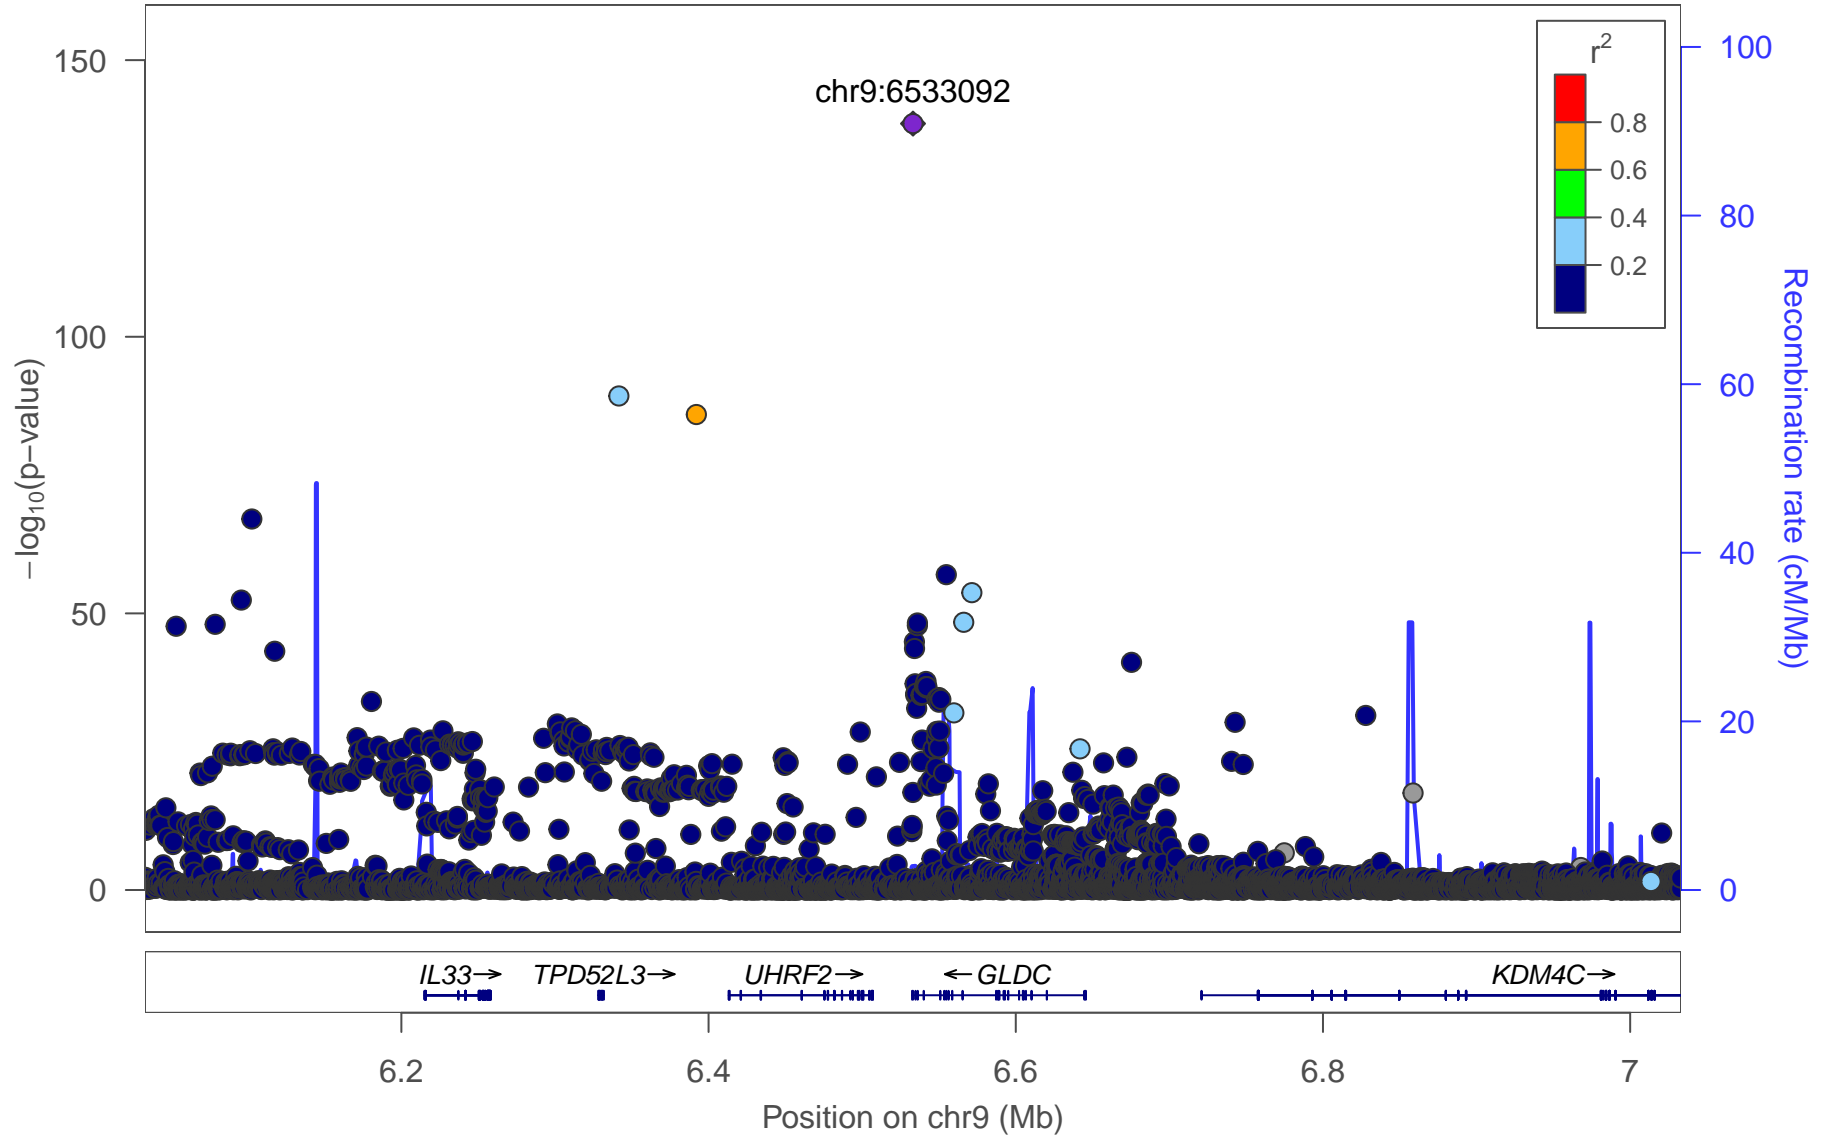

# 9\_2:HDL3-C

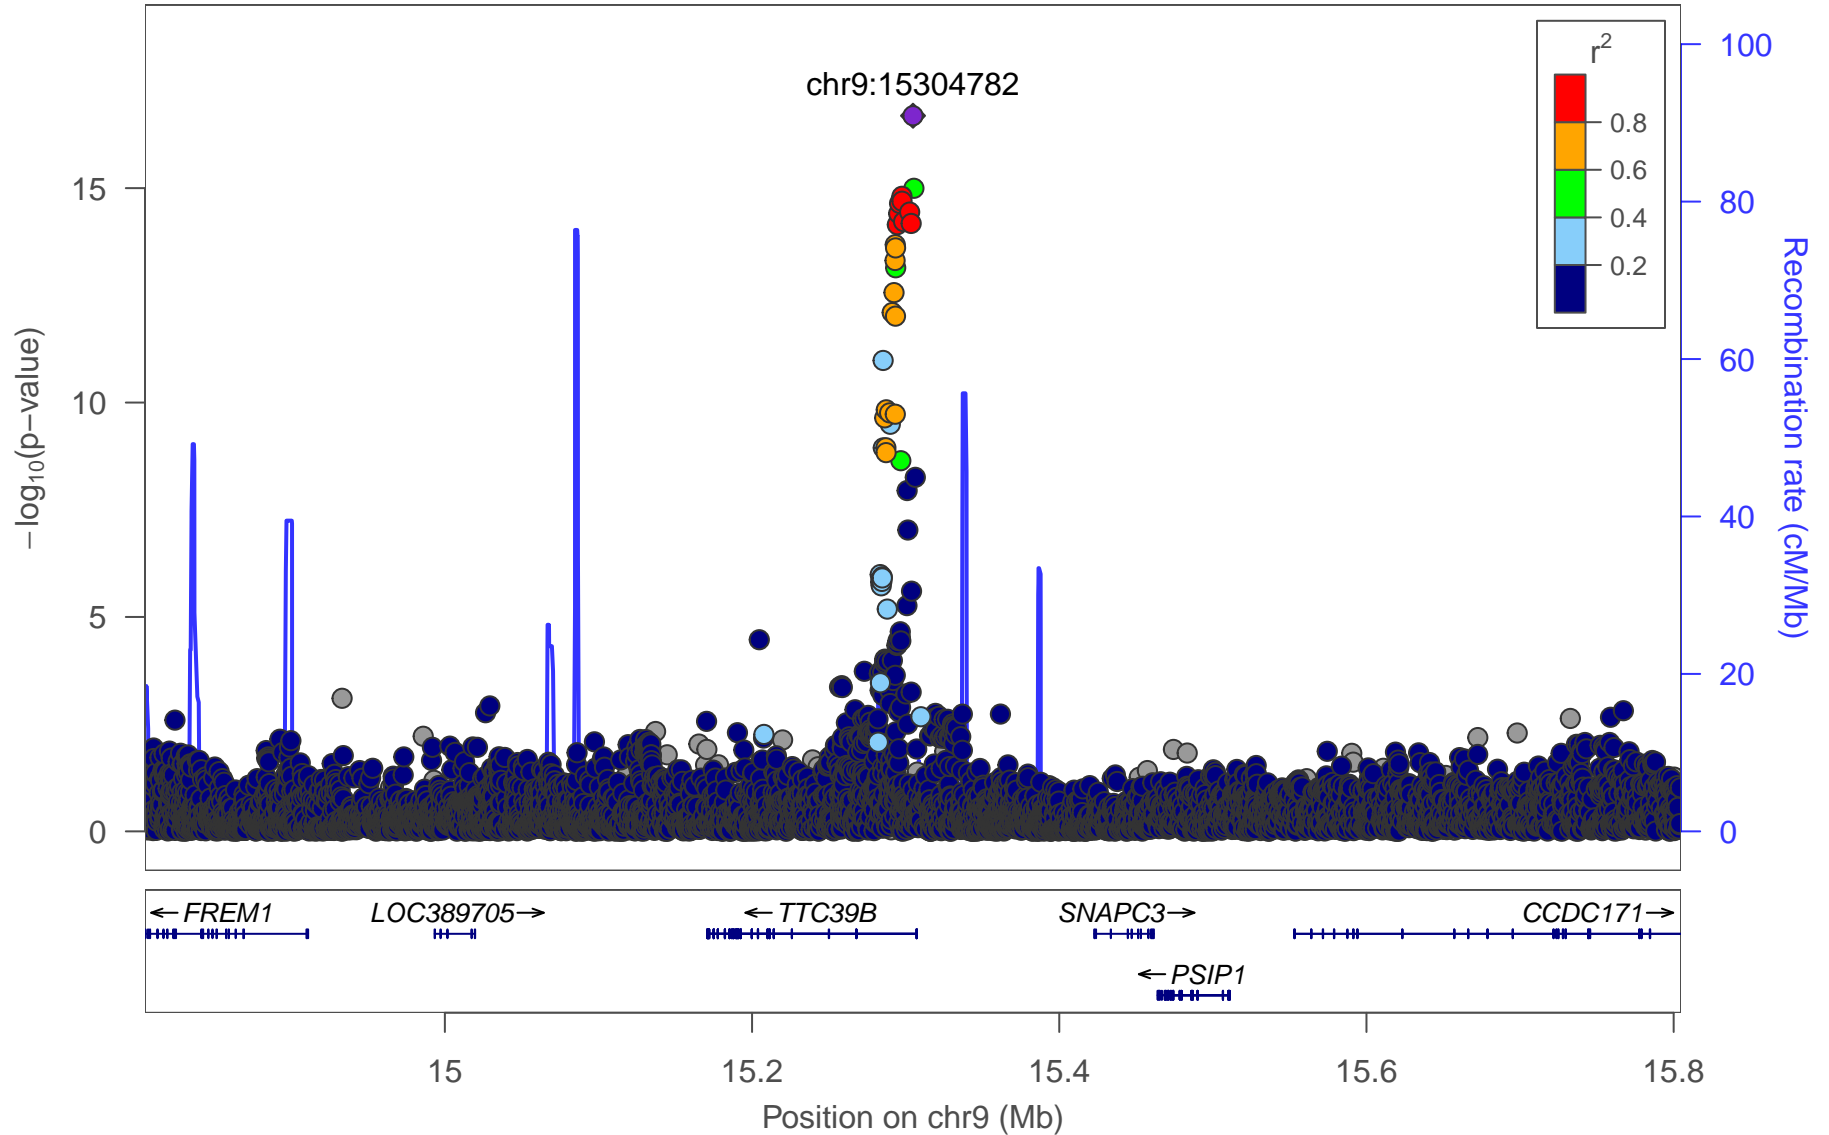

# 9\_3:ApoBbyApoA1

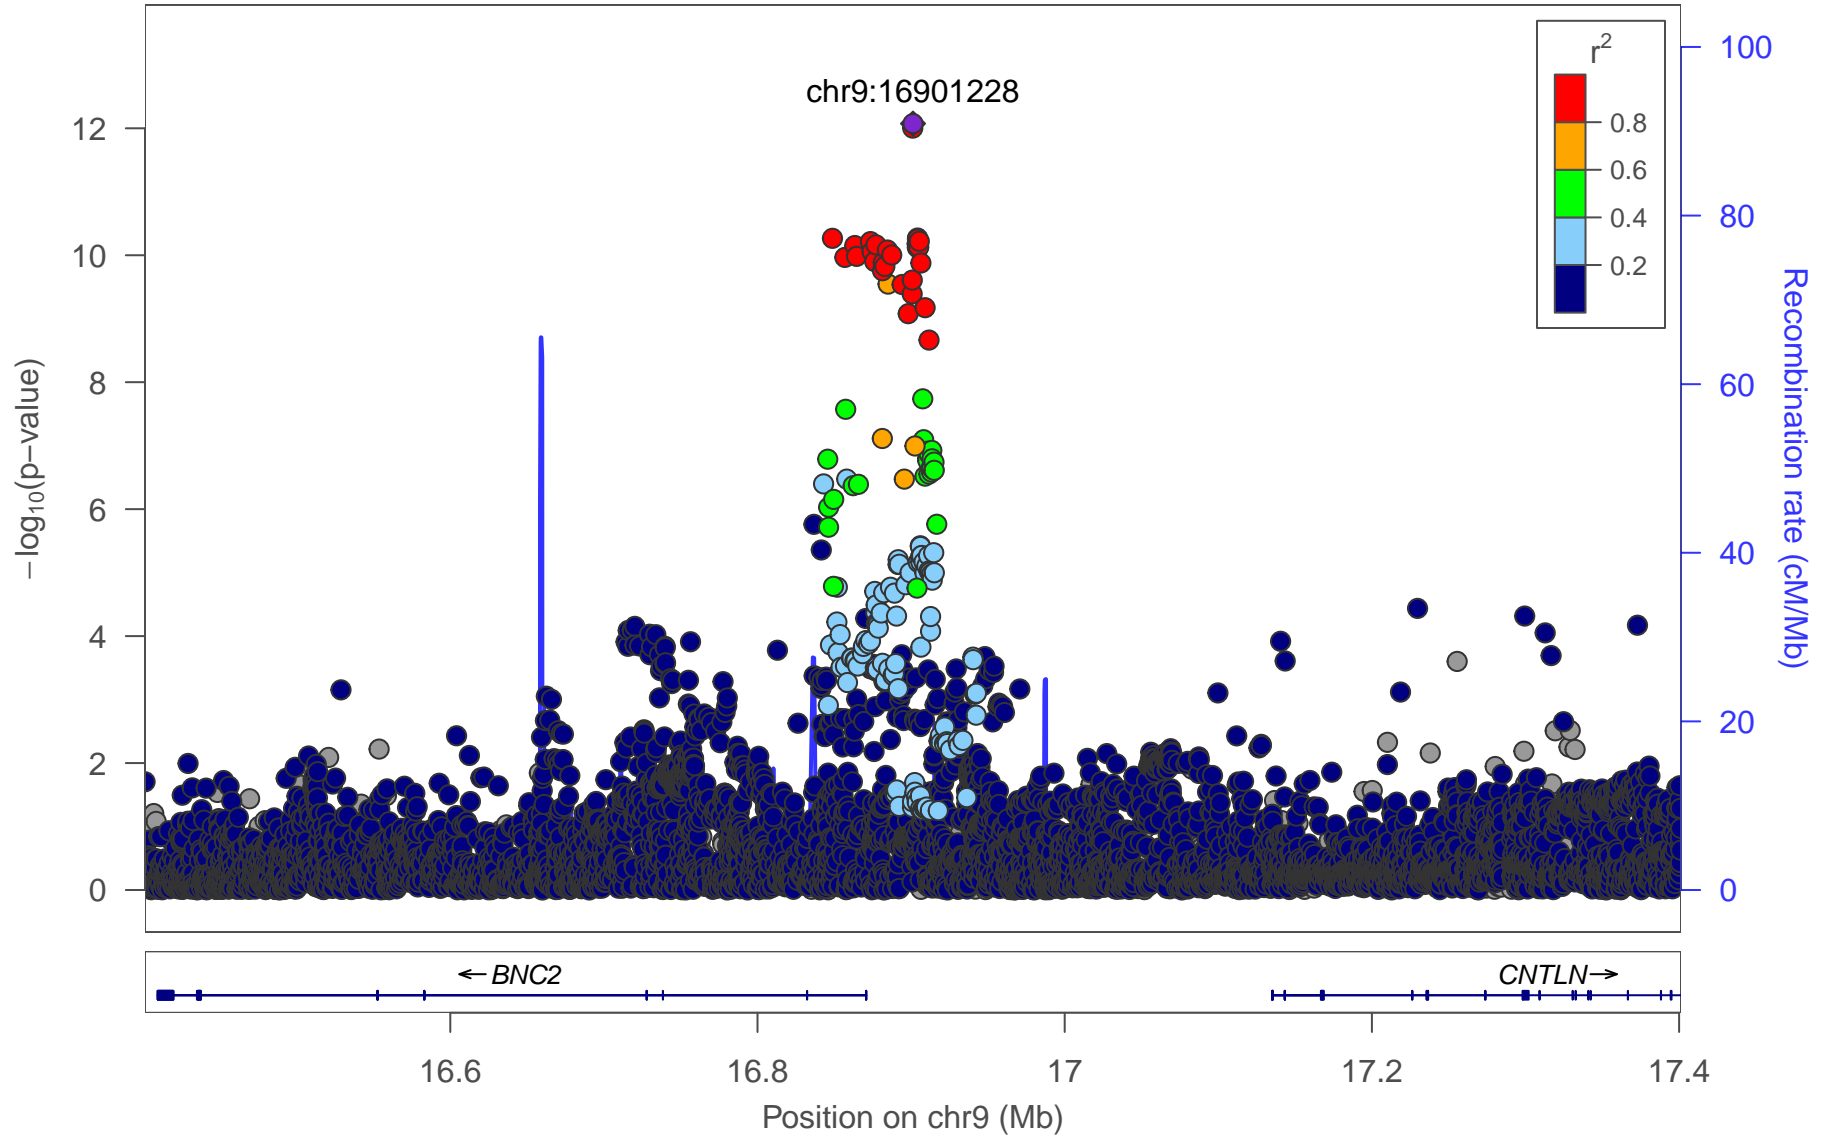



# 9\_4:Glc

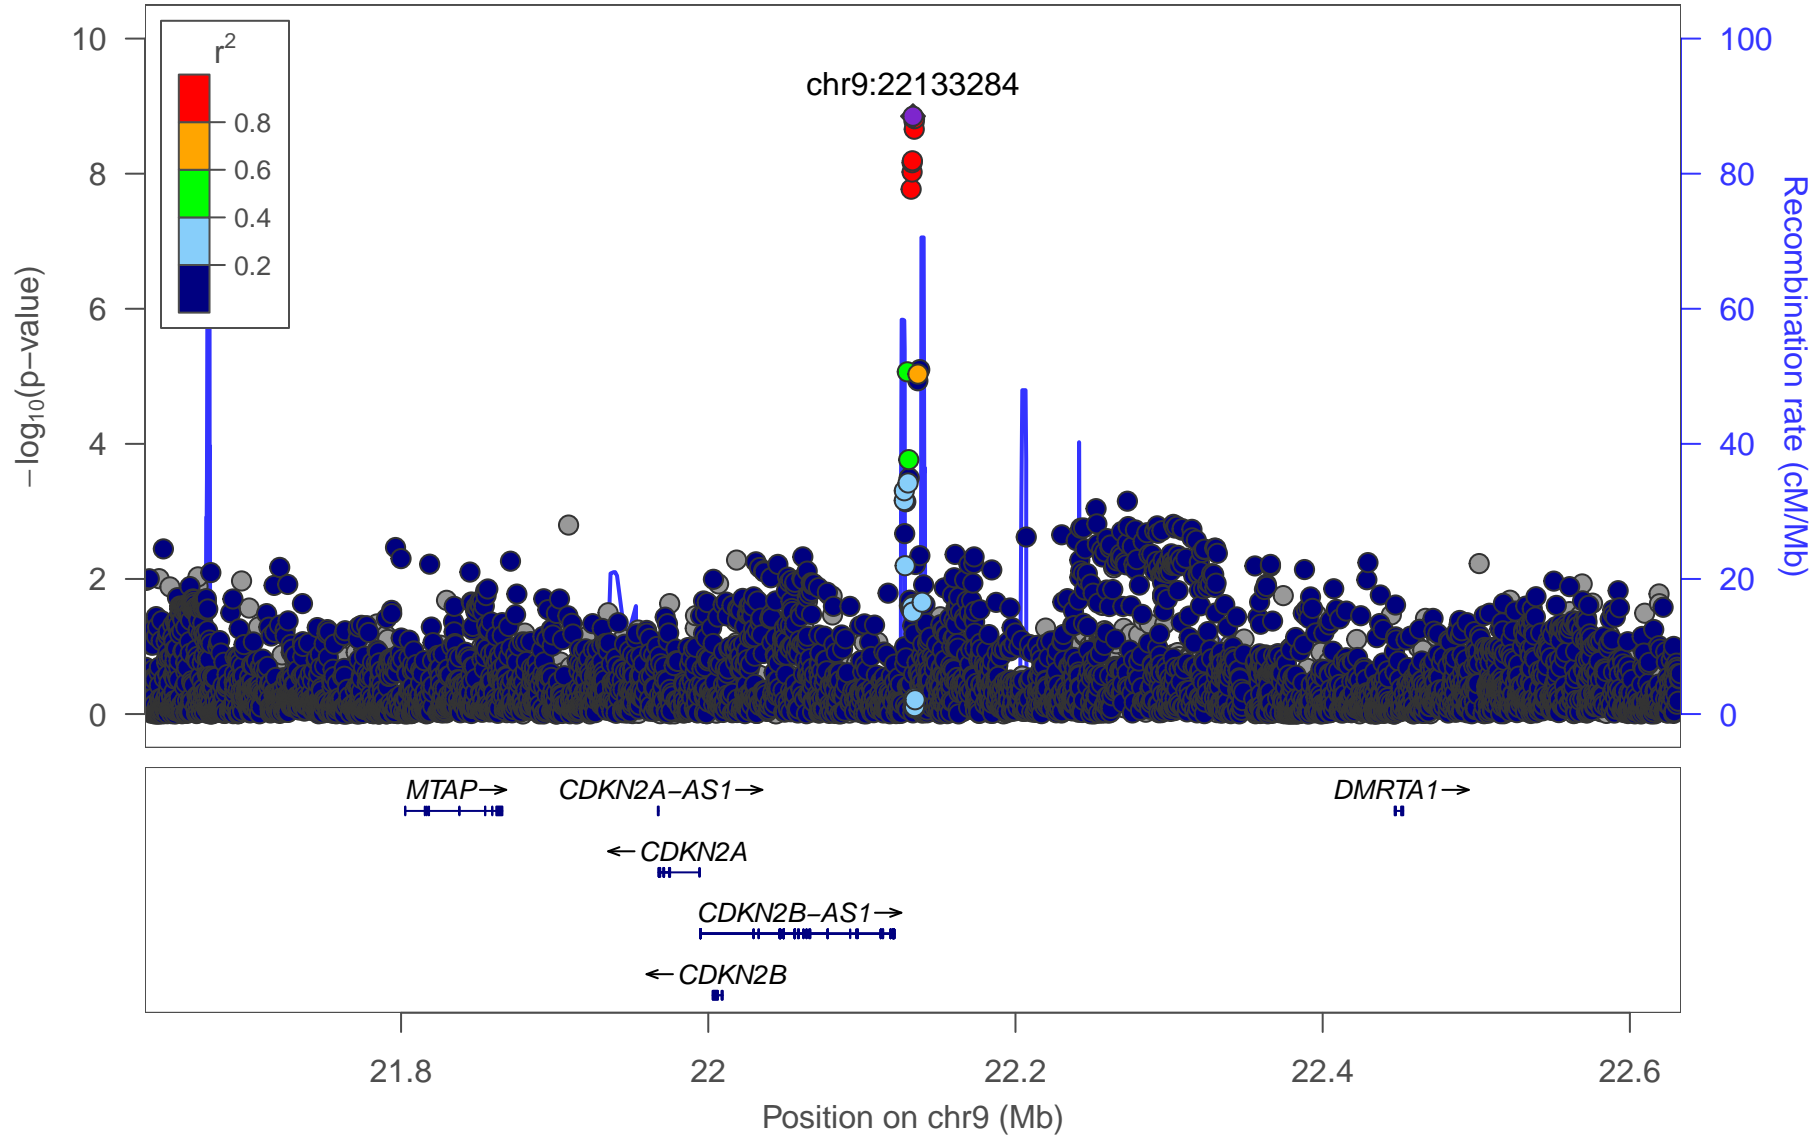

# 9\_5:Crea

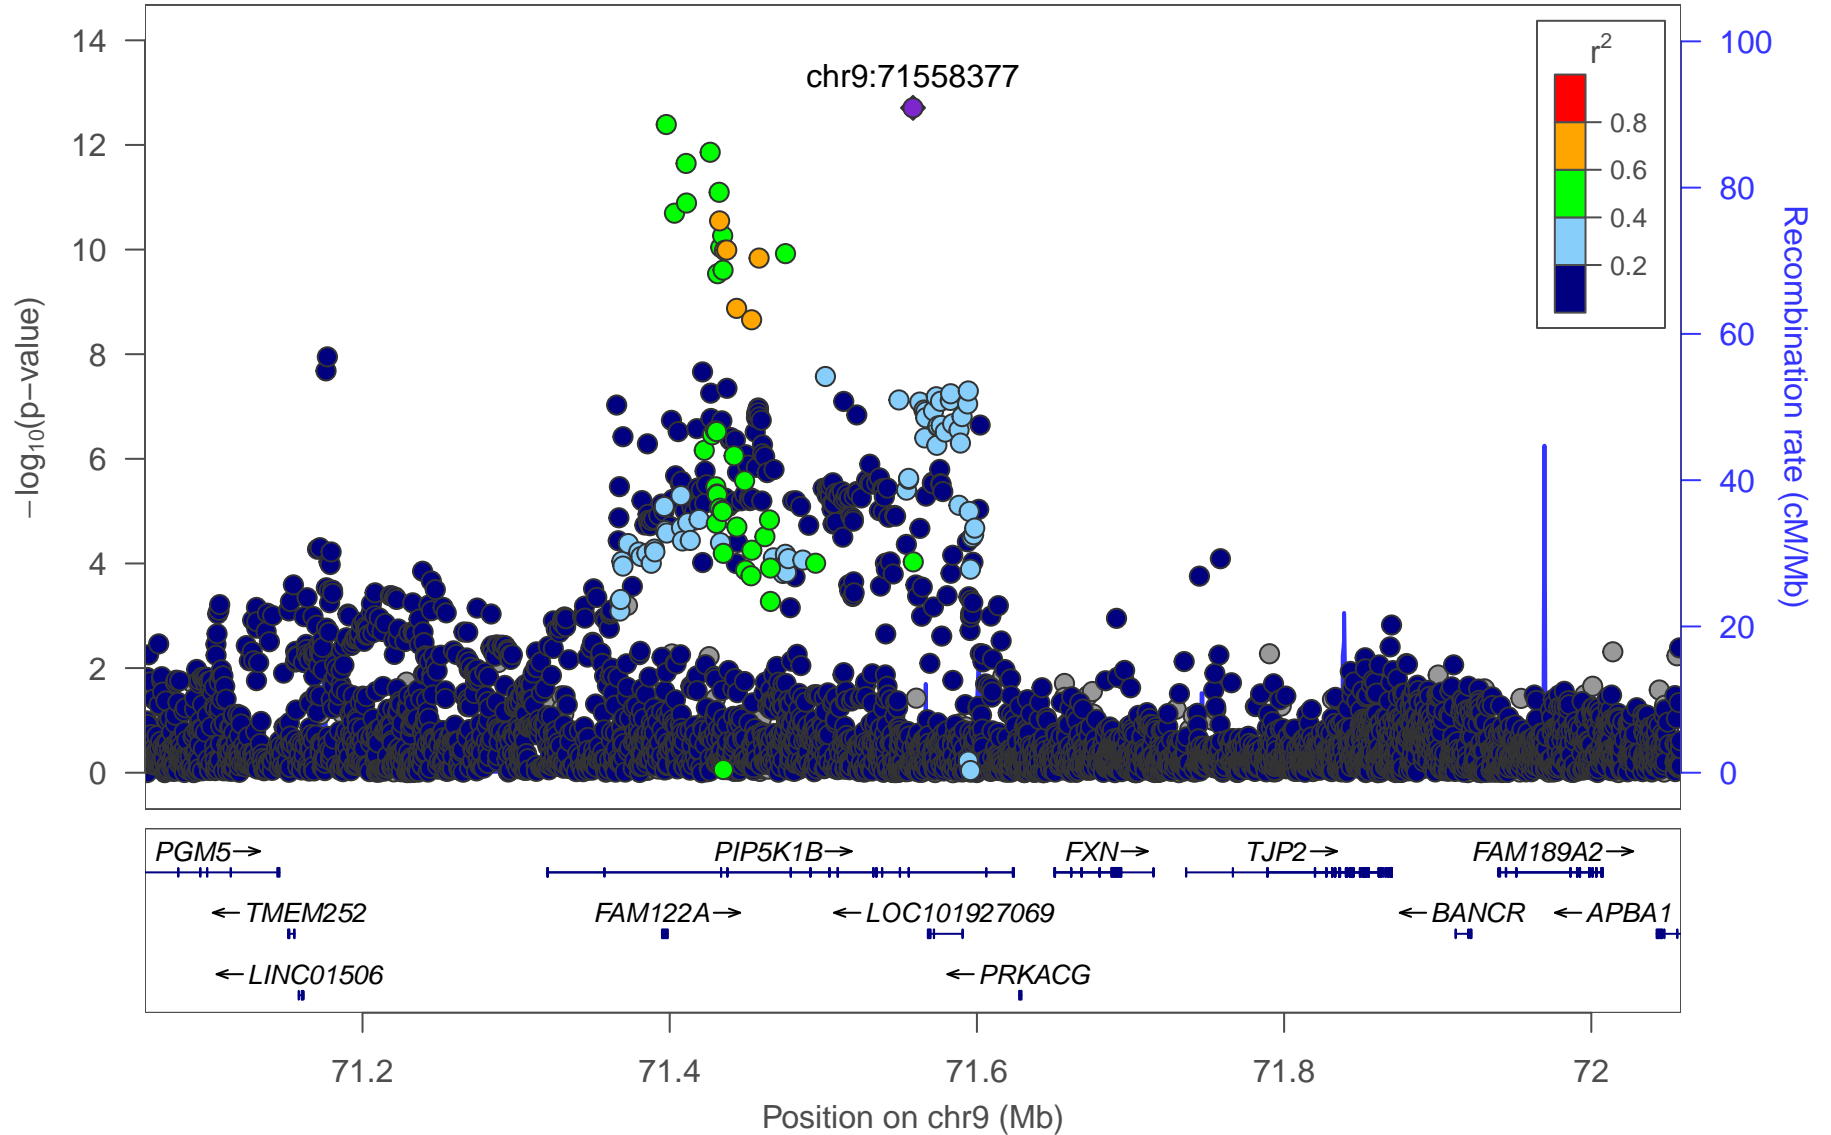

# 9\_6:S-HDL-C\_percent

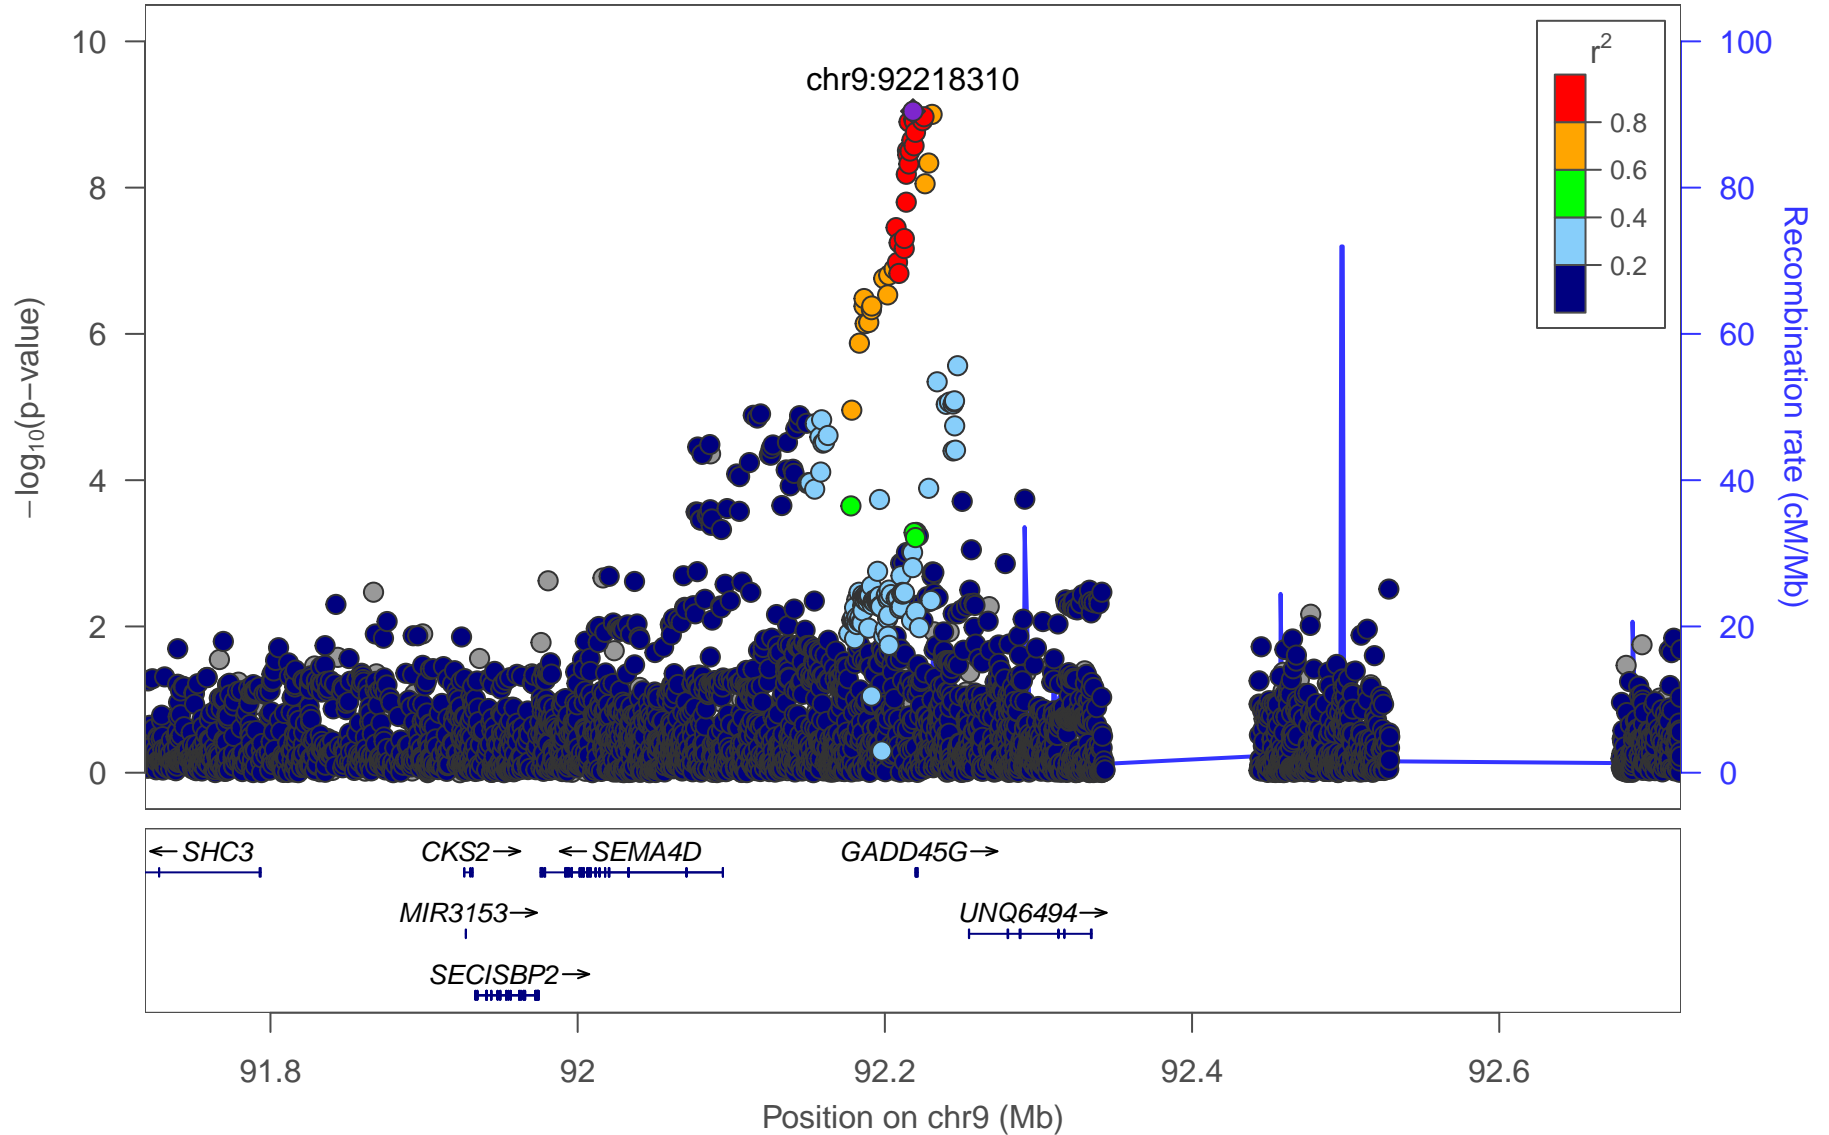

# 9\_7:XL-HDL-CE

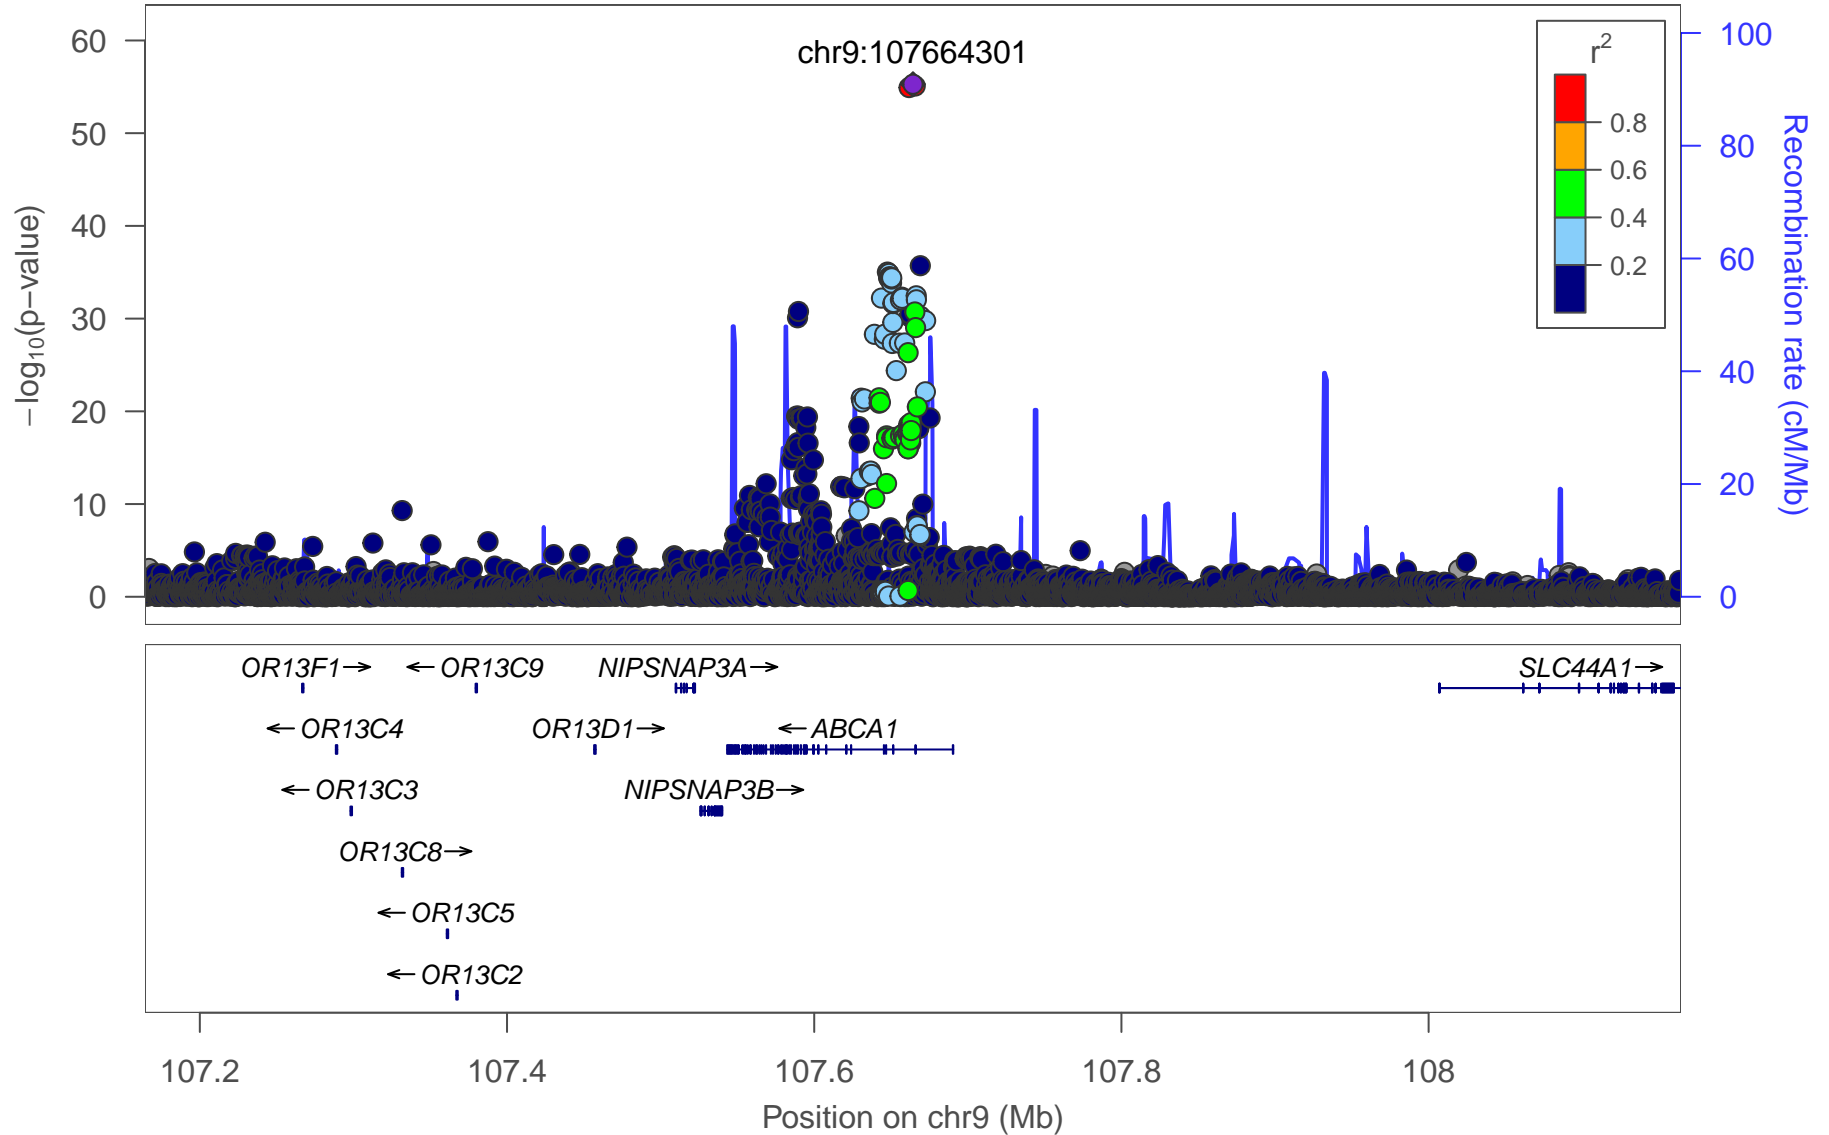

# 9\_8:GlycA

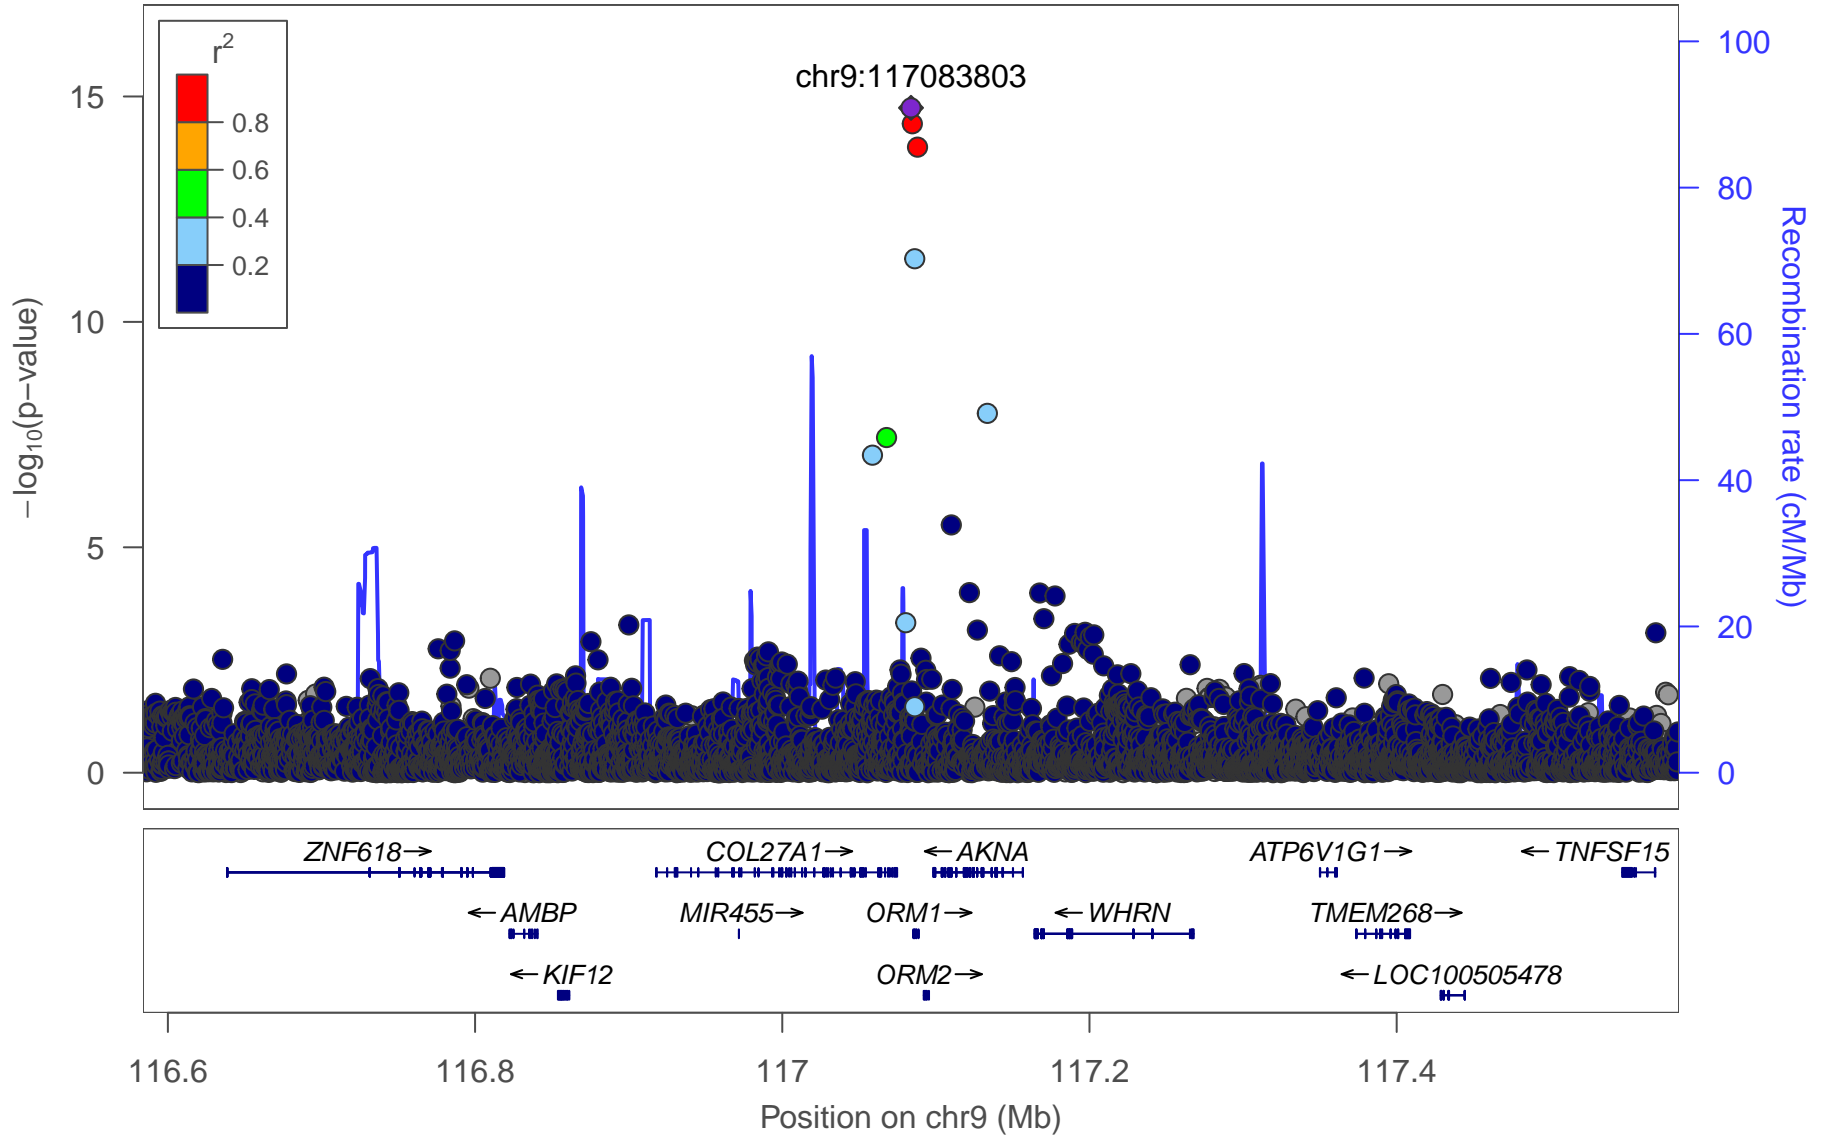

# 9\_9:L-LDL-FC

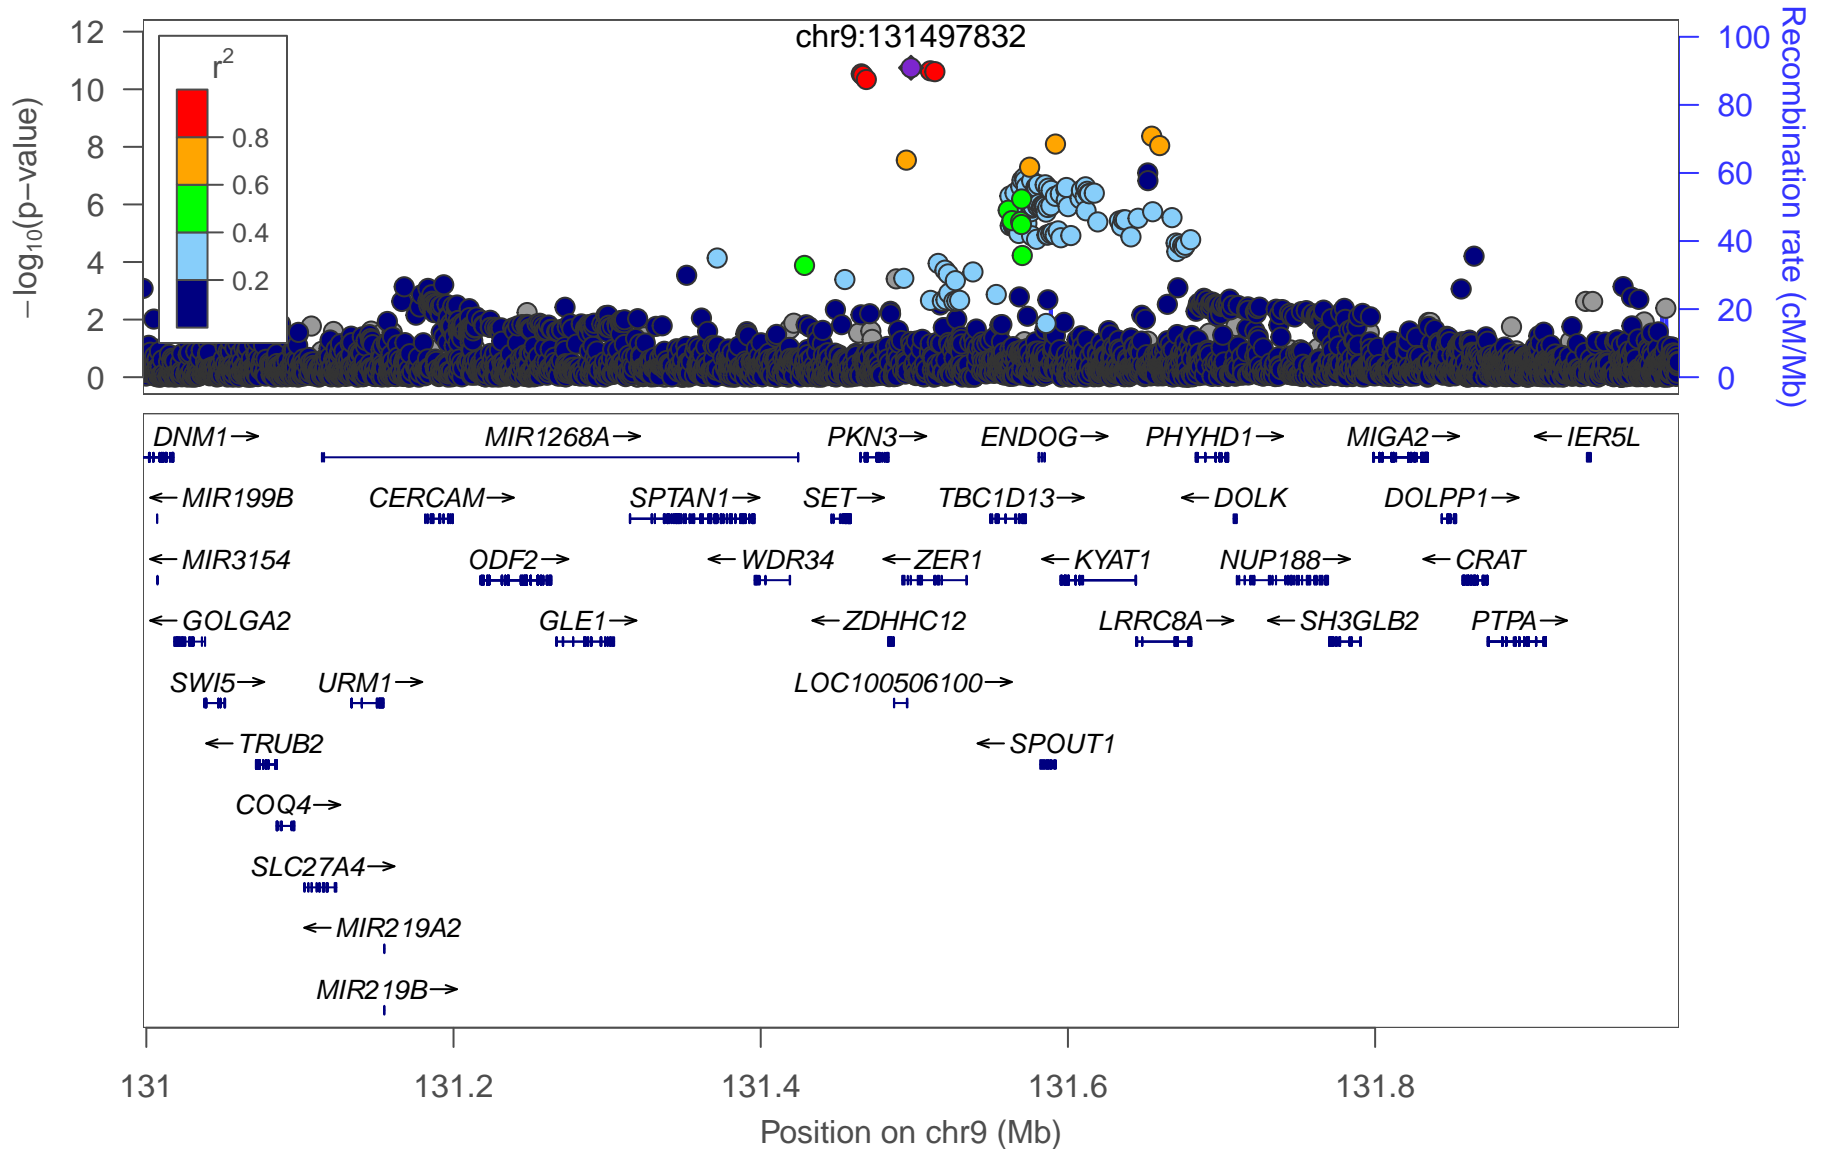

# 9\_10:XS-VLDL-C

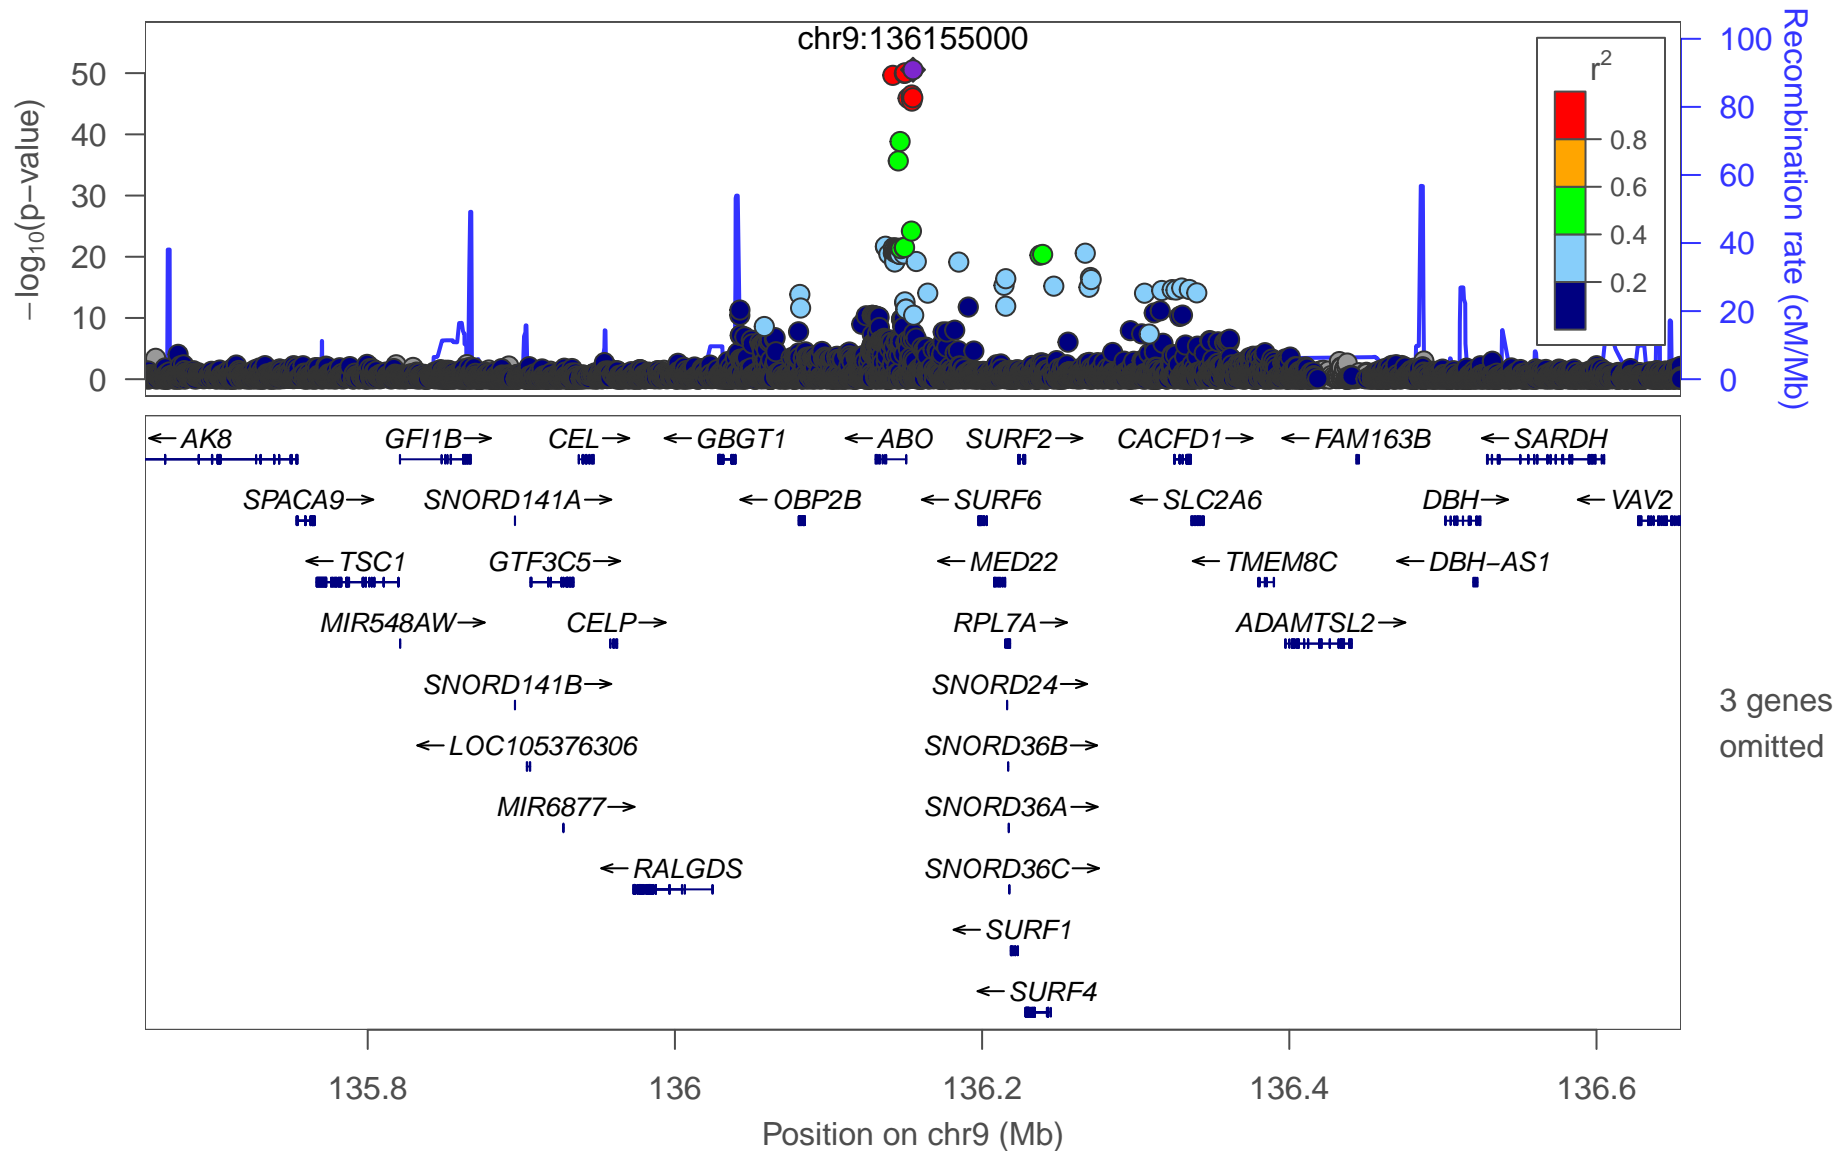

# 9\_11:MUFAbyFA

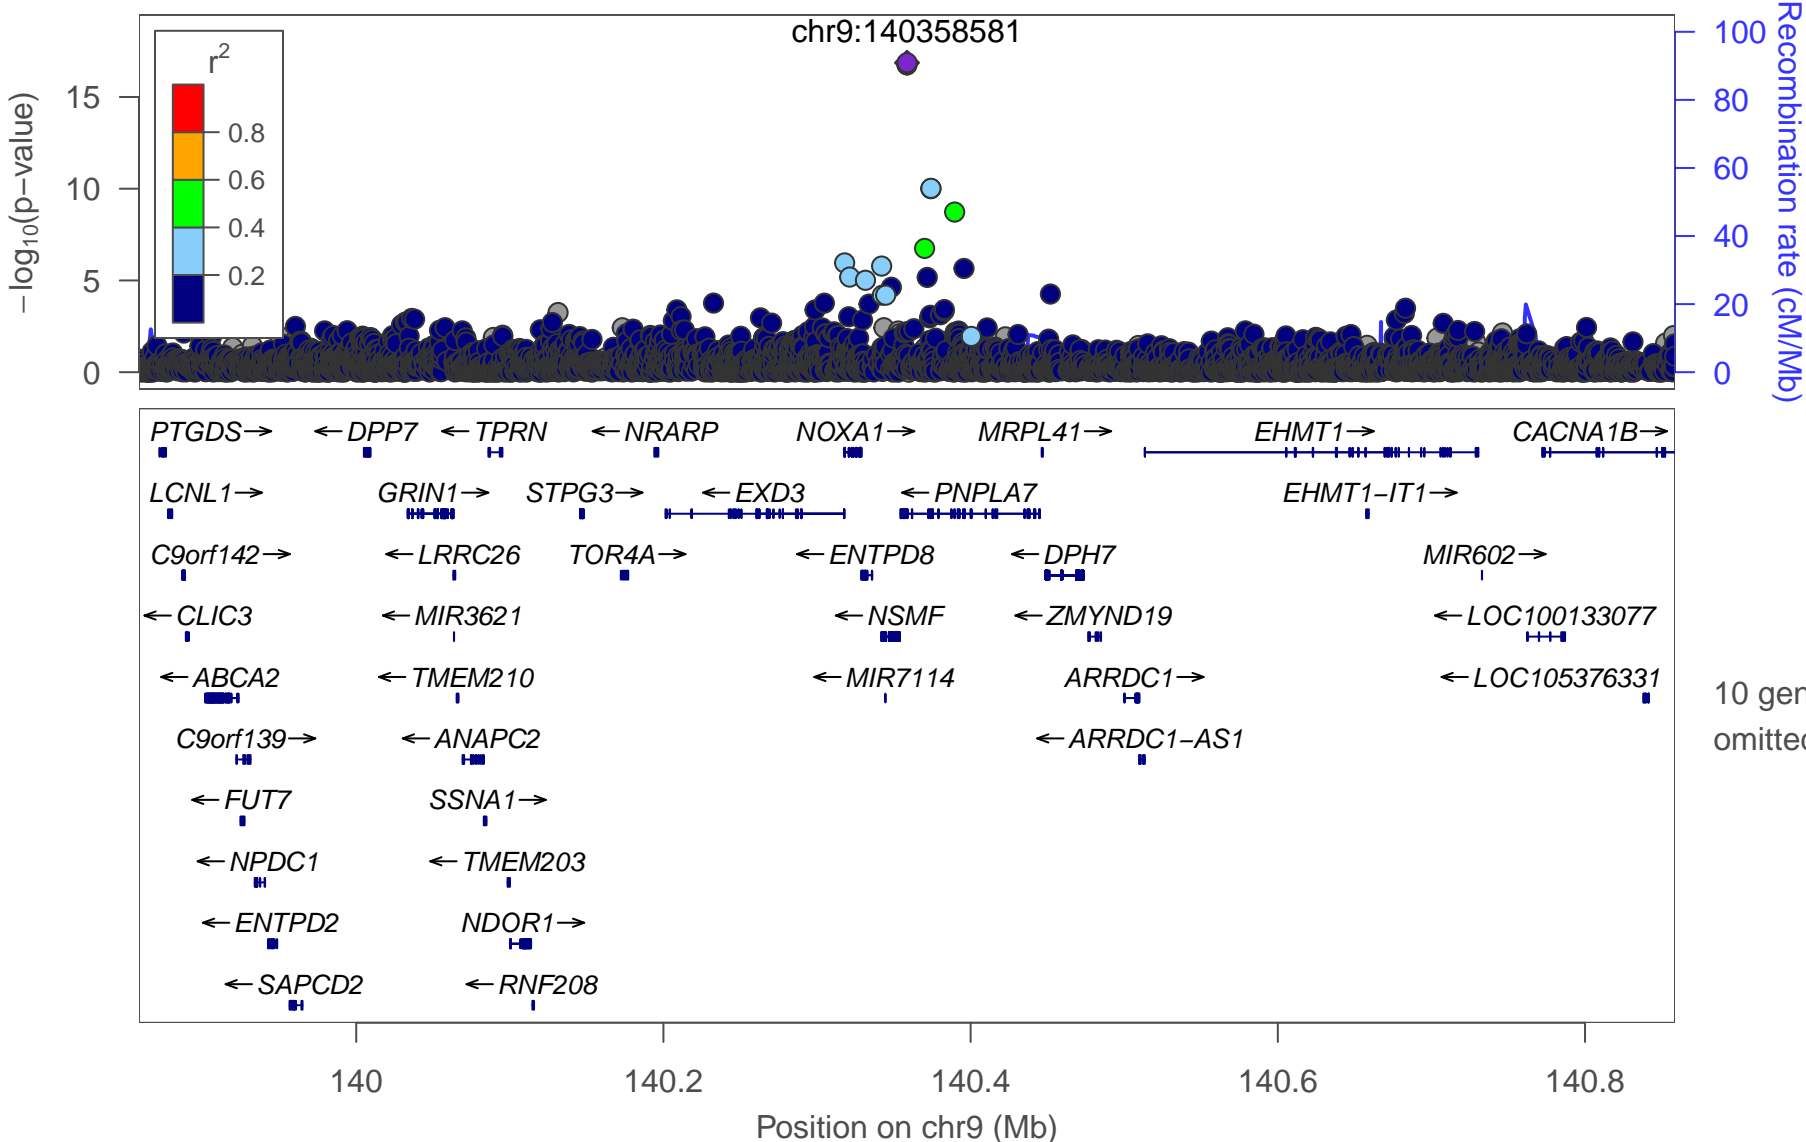



# 10\_1:Crea

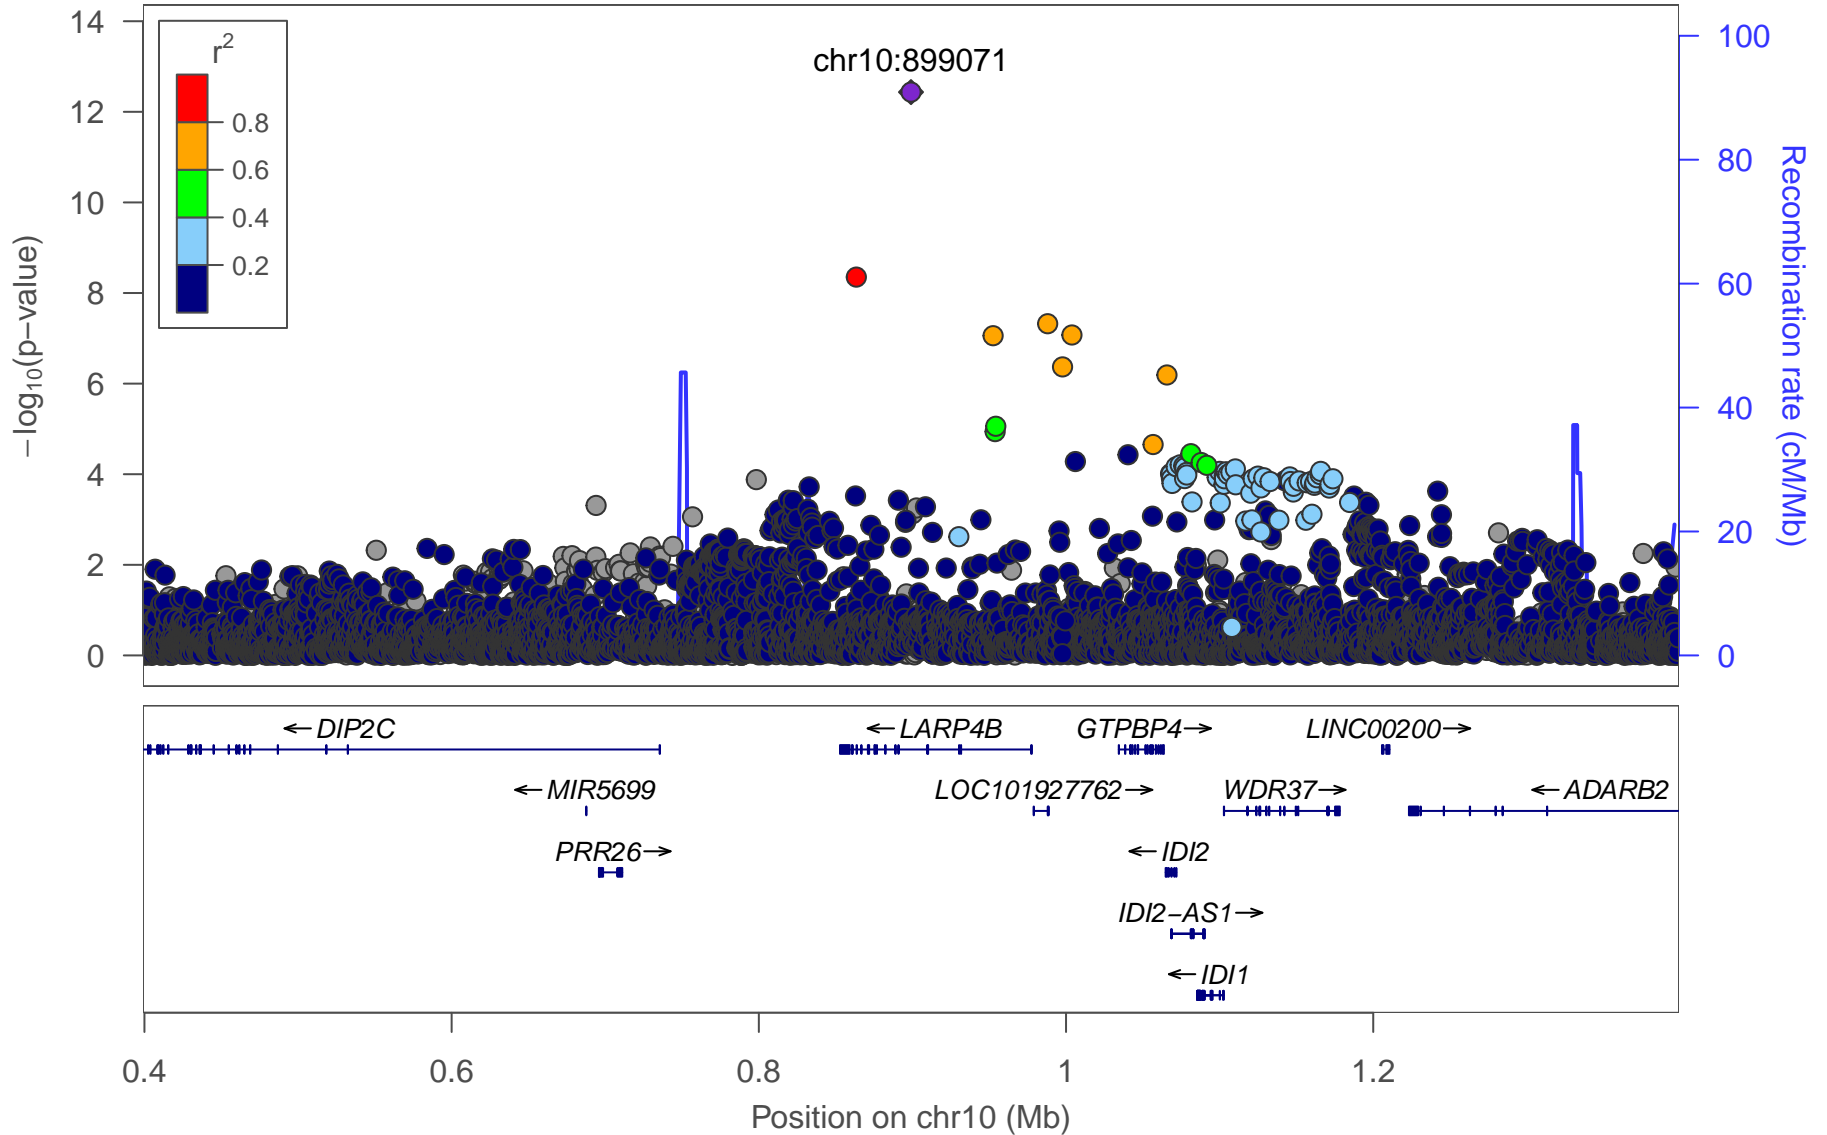

# 10\_2:Lac

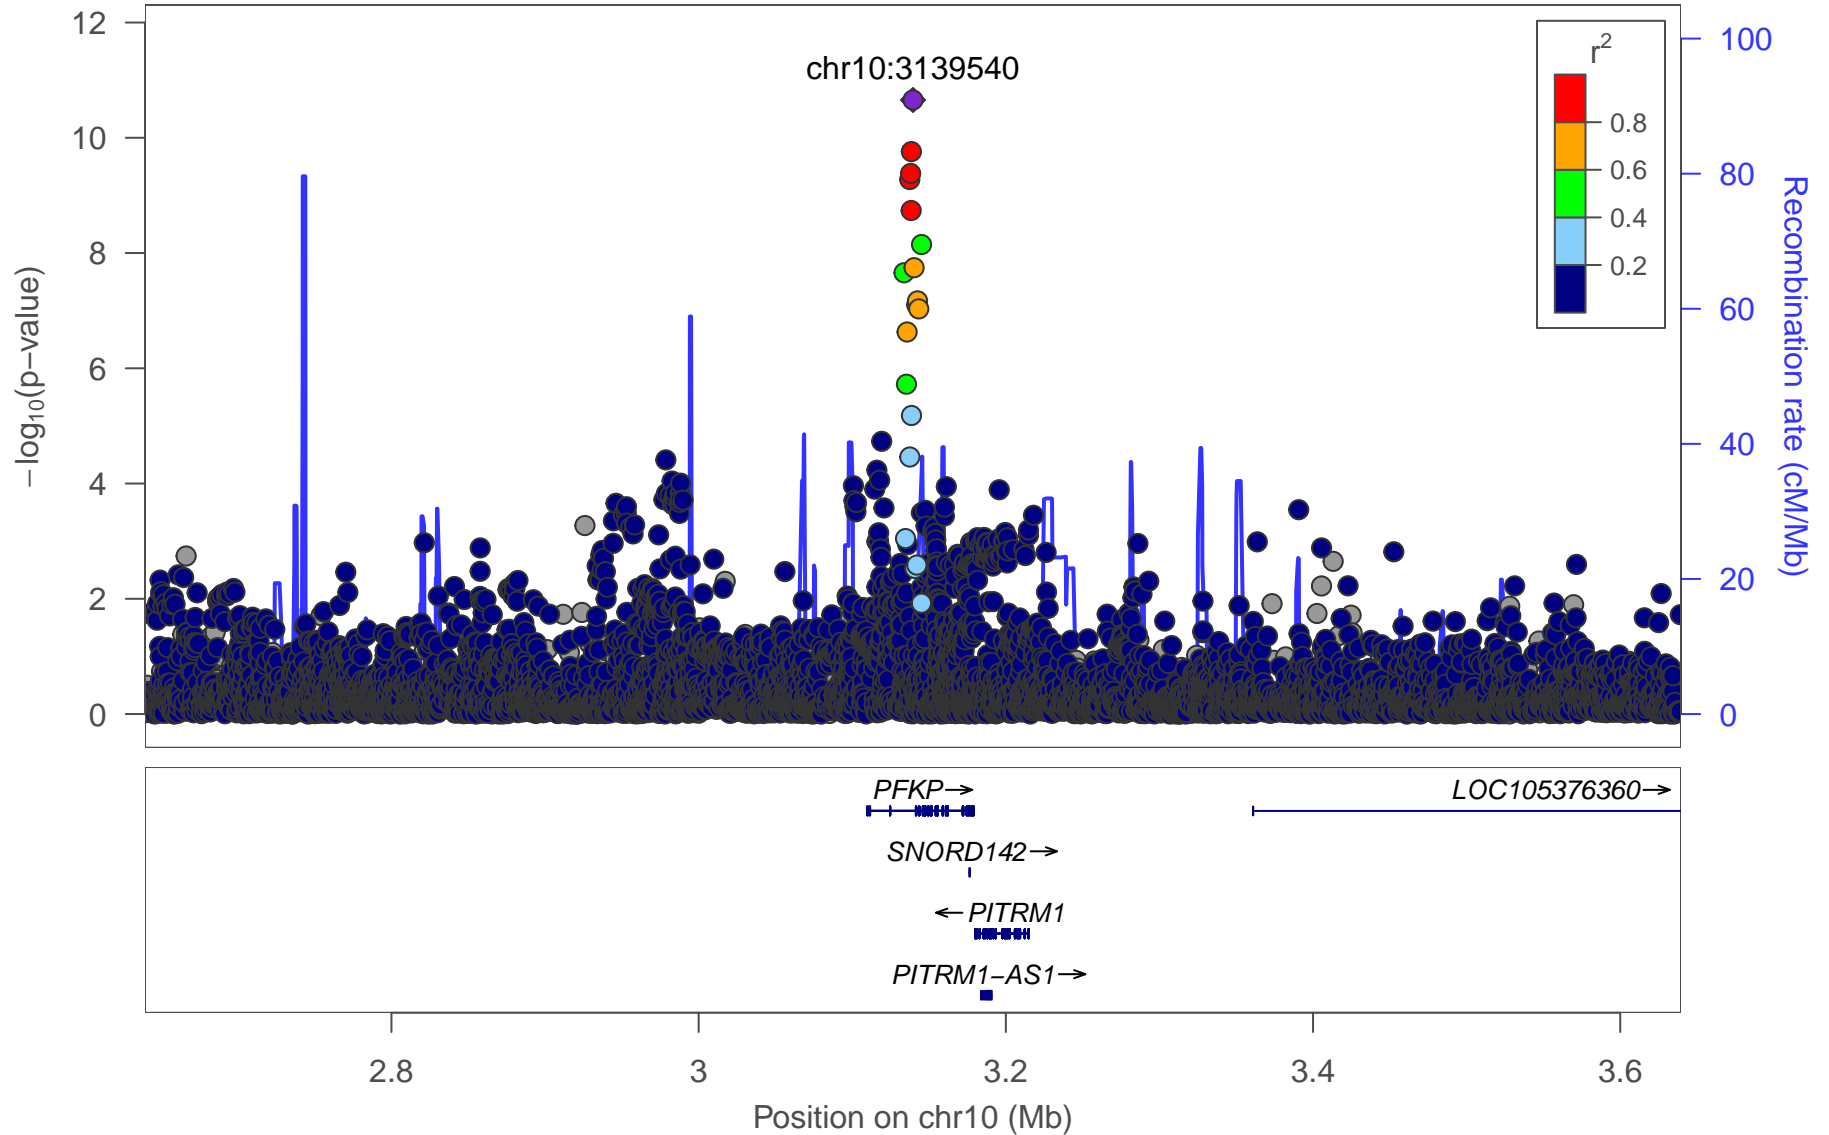

# 10\_3:LAbbyFA

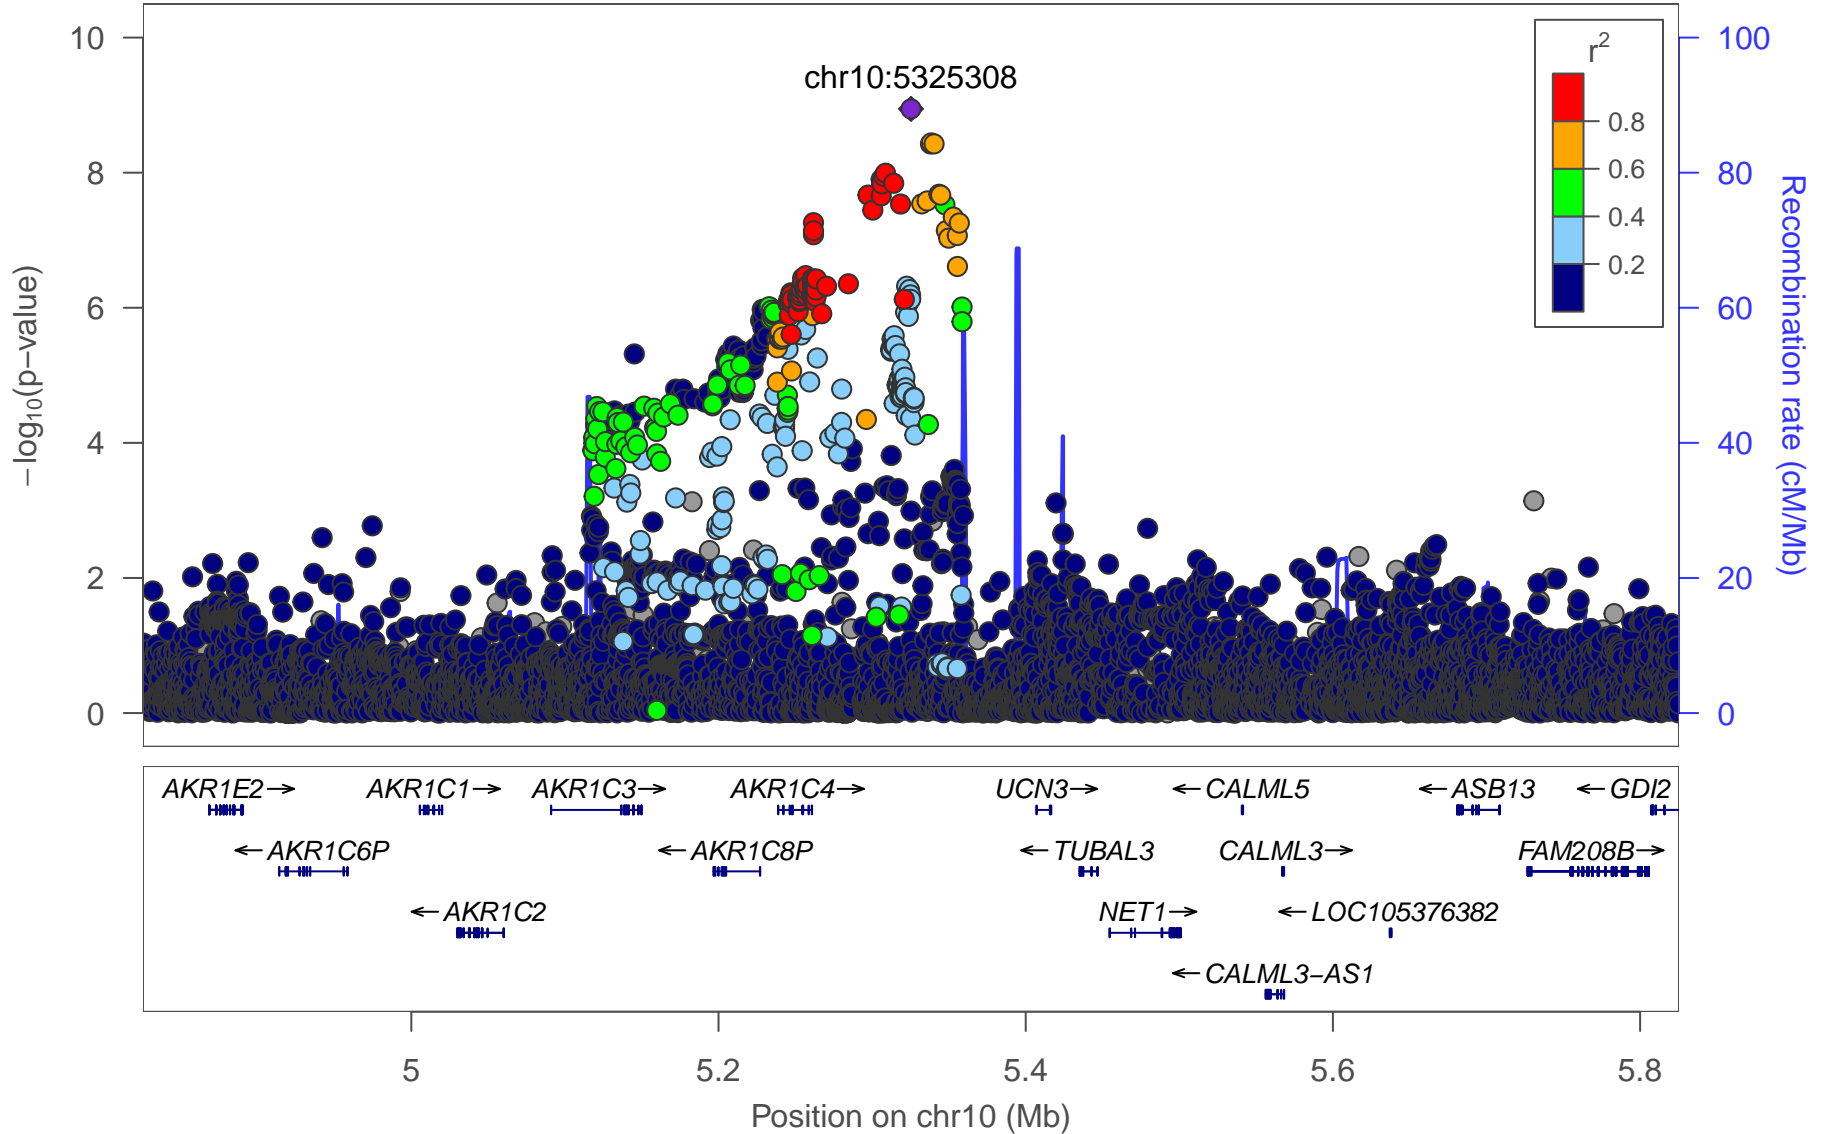

# 10\_4:XL-HDL-PL

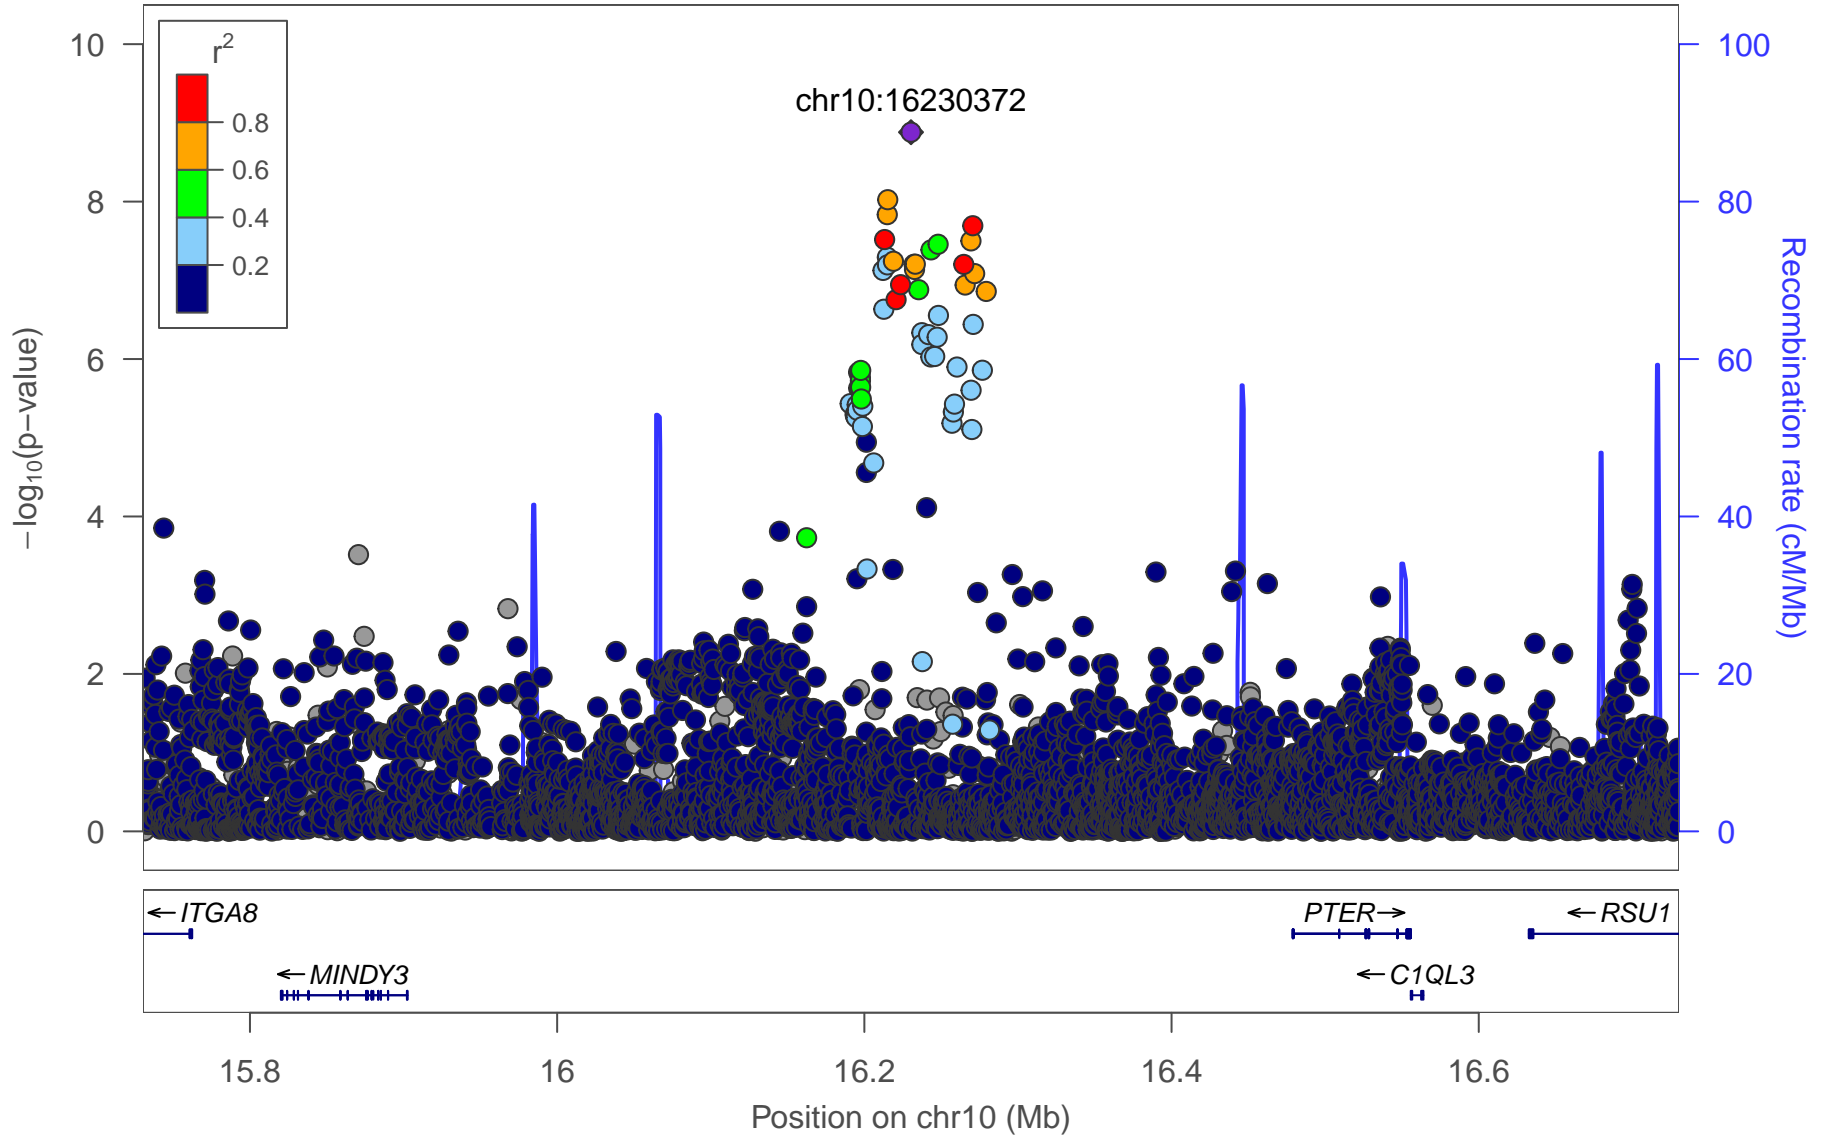

# 10\_5:ApoA1

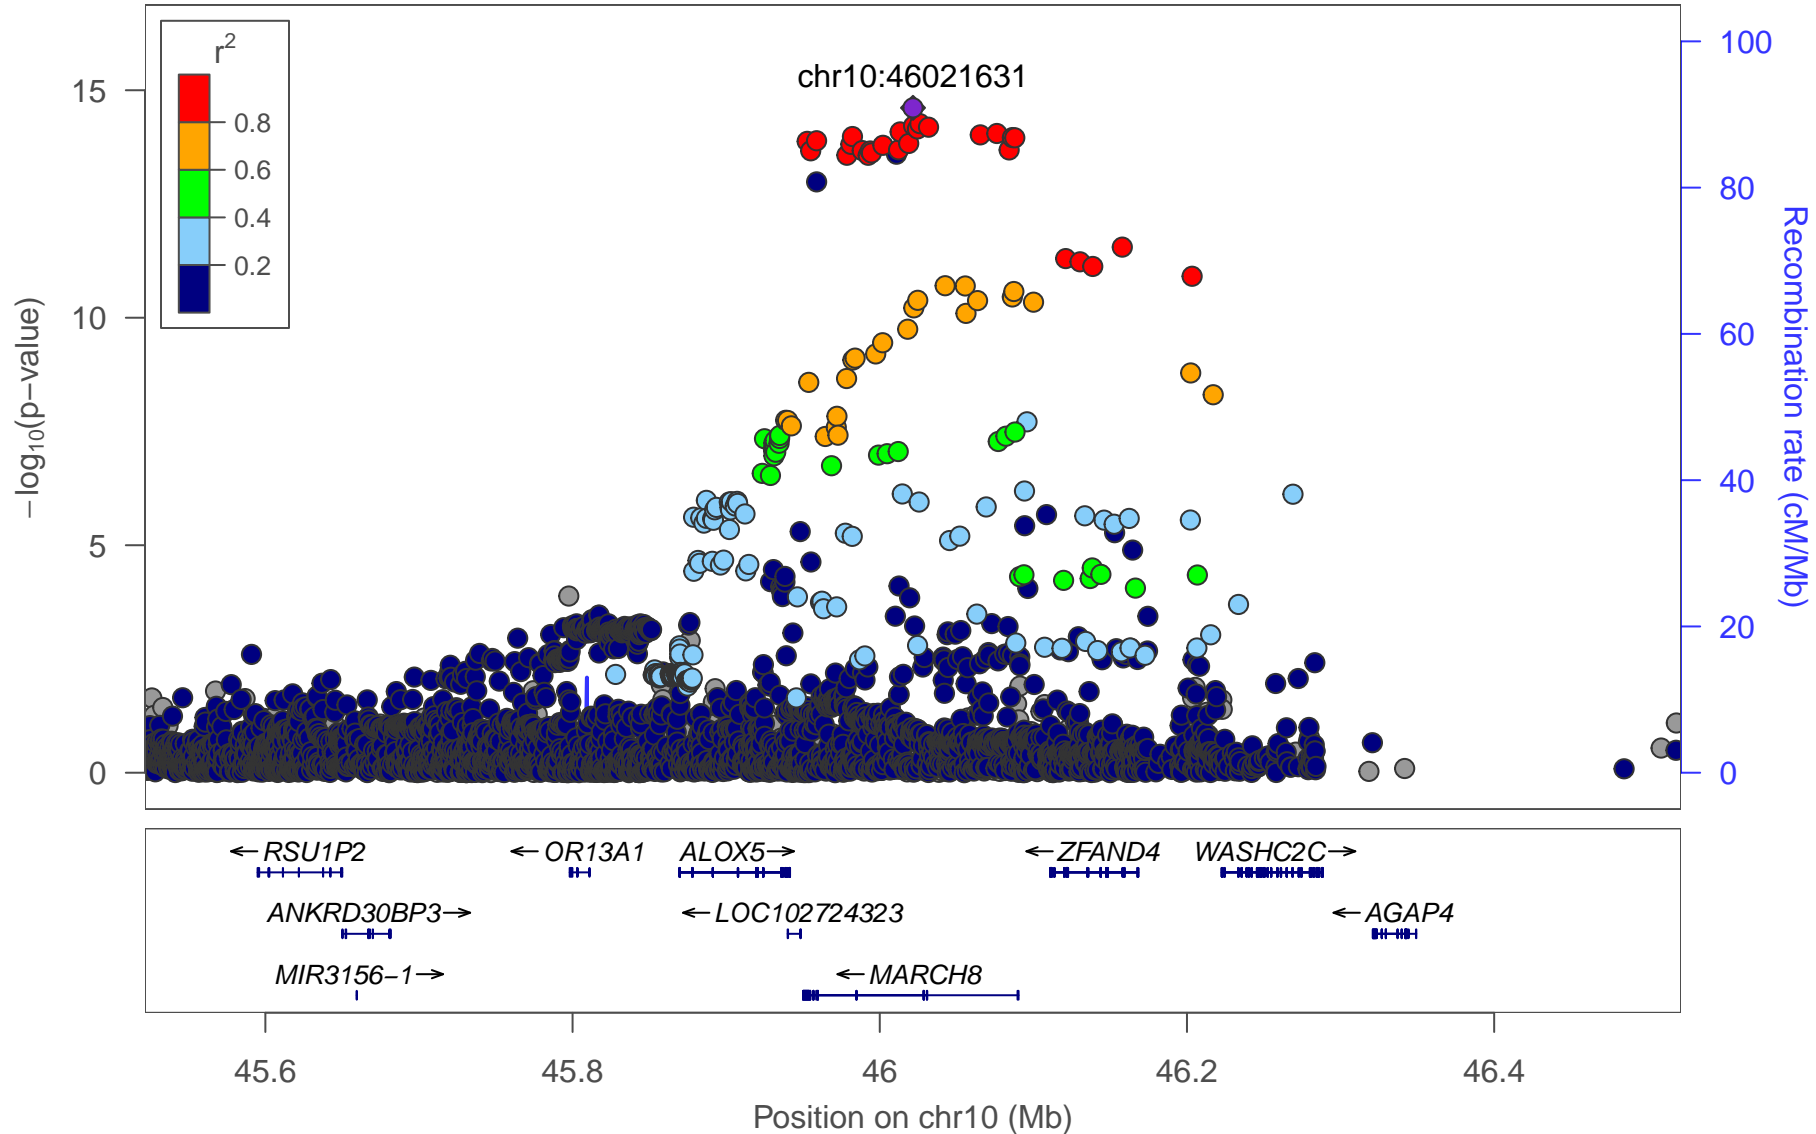

# 10\_6:IDL-C\_percent

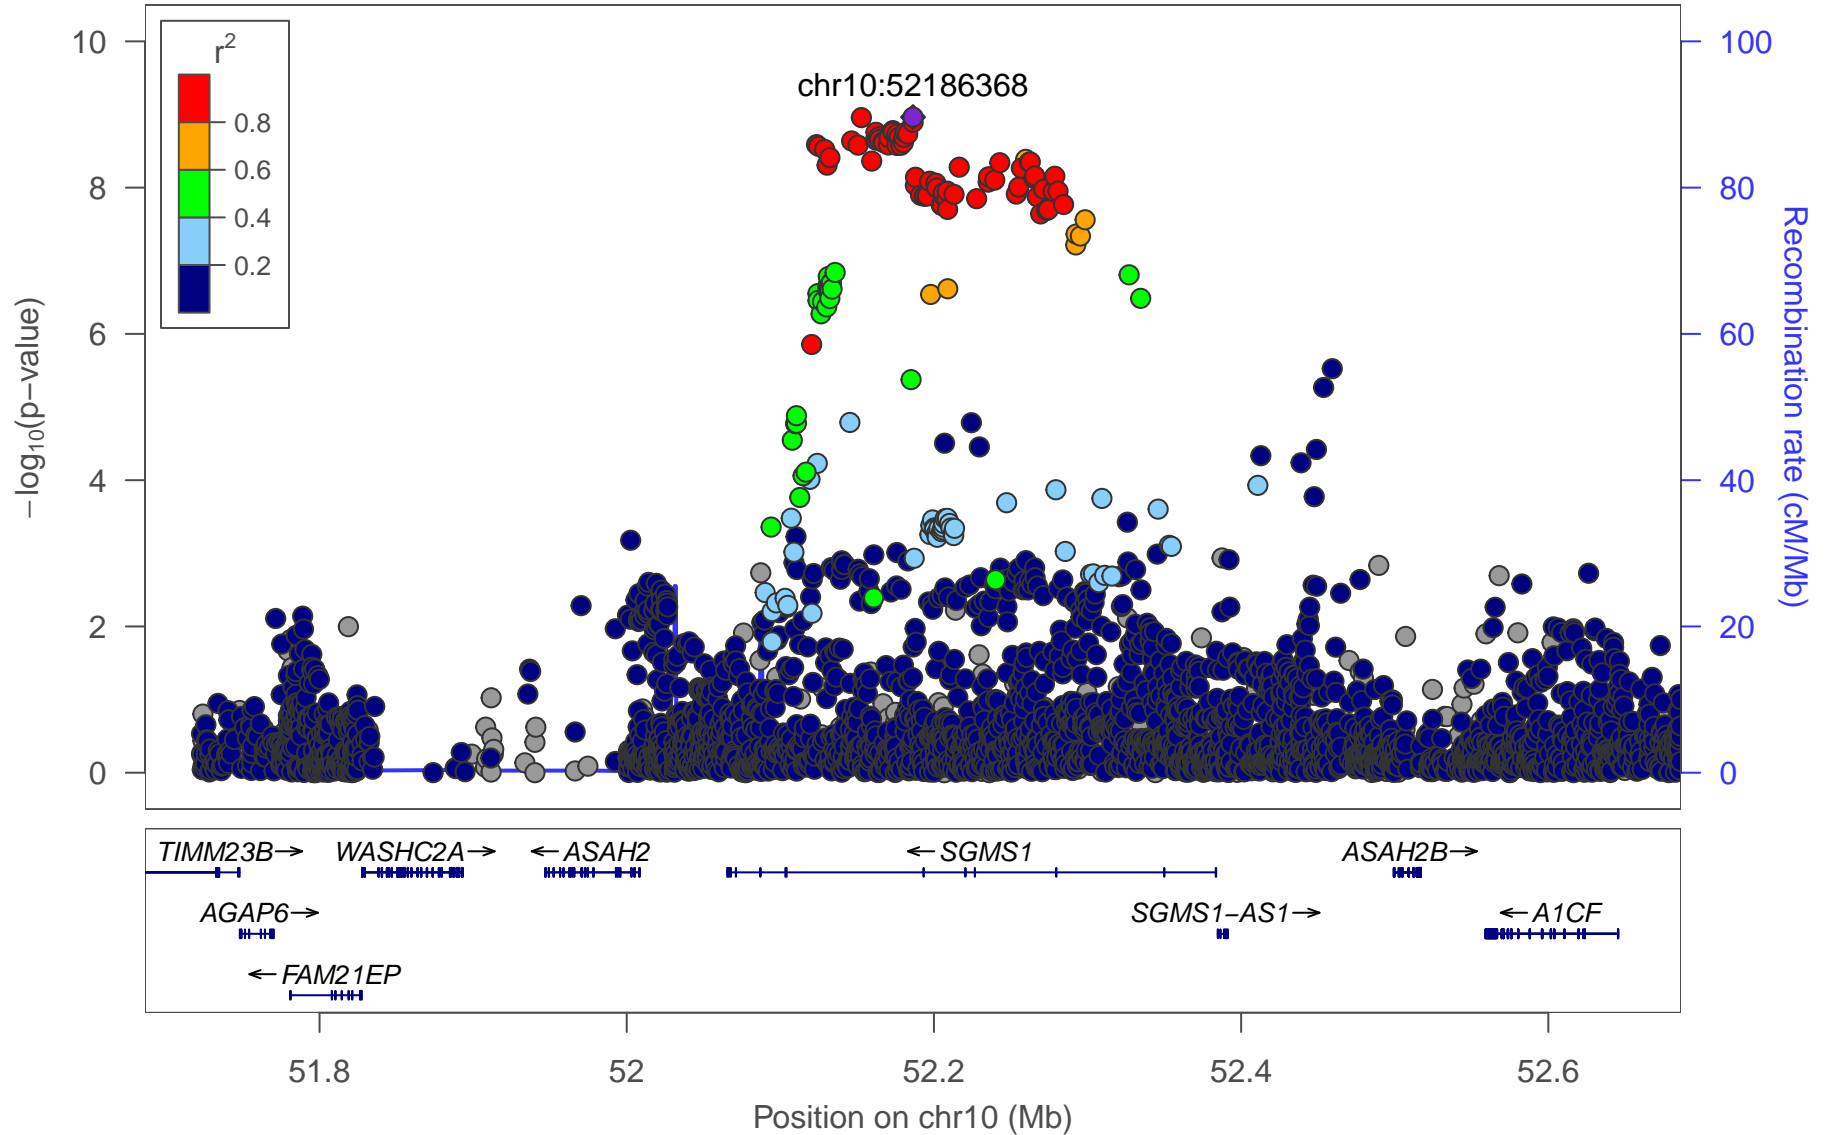

# 10\_7:S-VLDL-TG\_percent

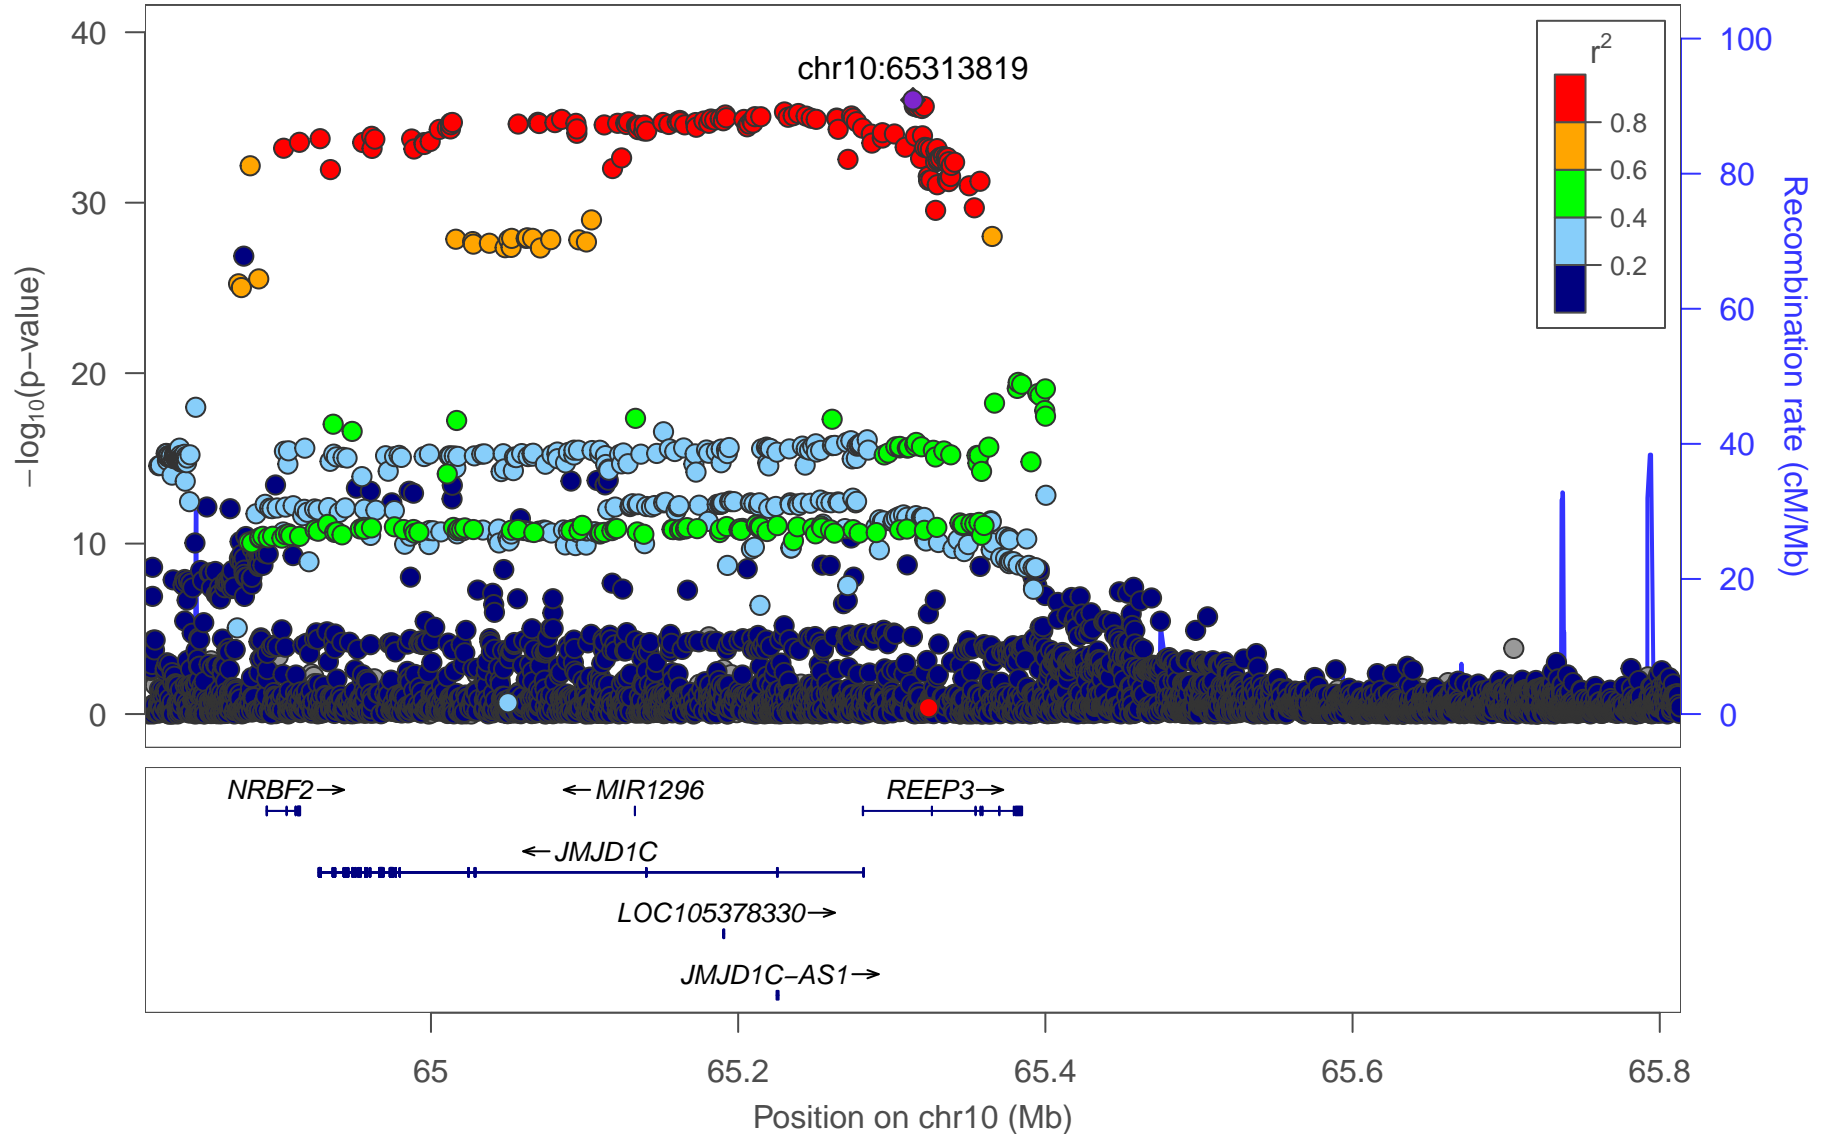

# 10\_8:Val

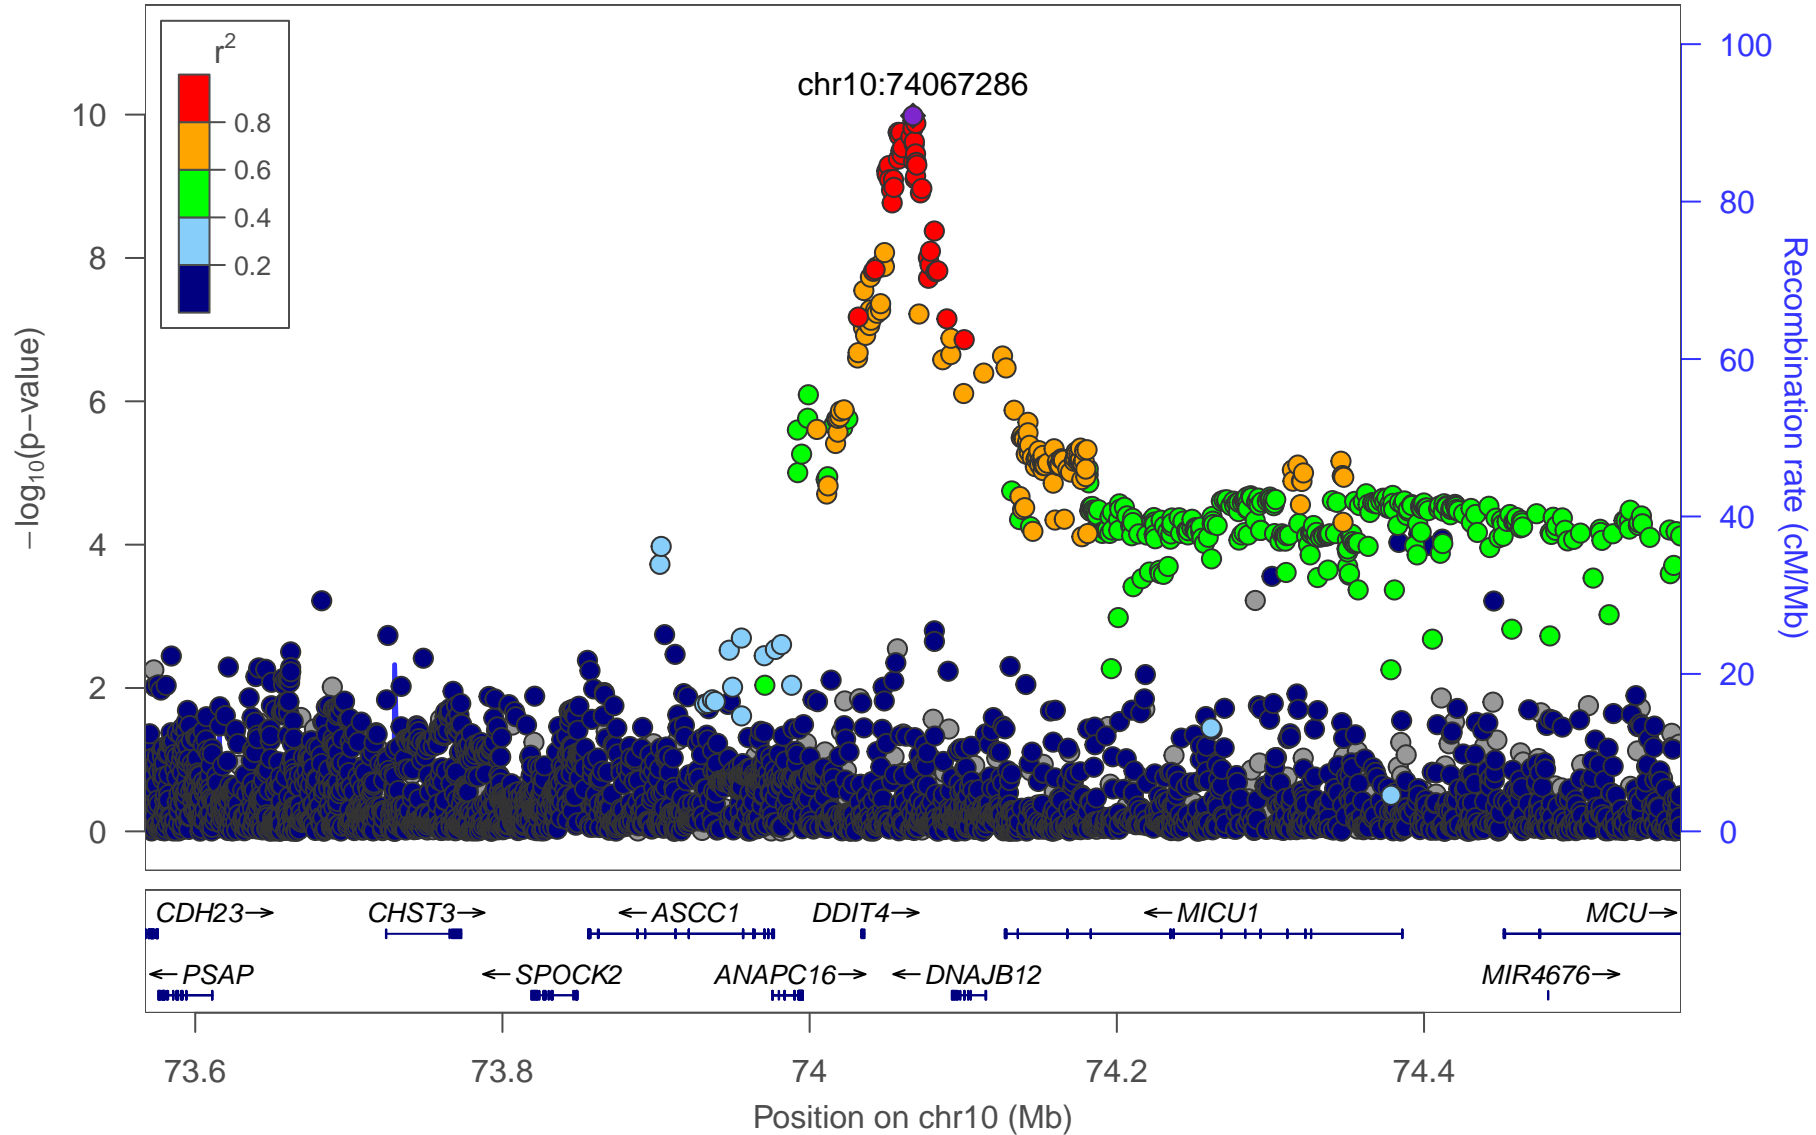



# 10\_9:Val

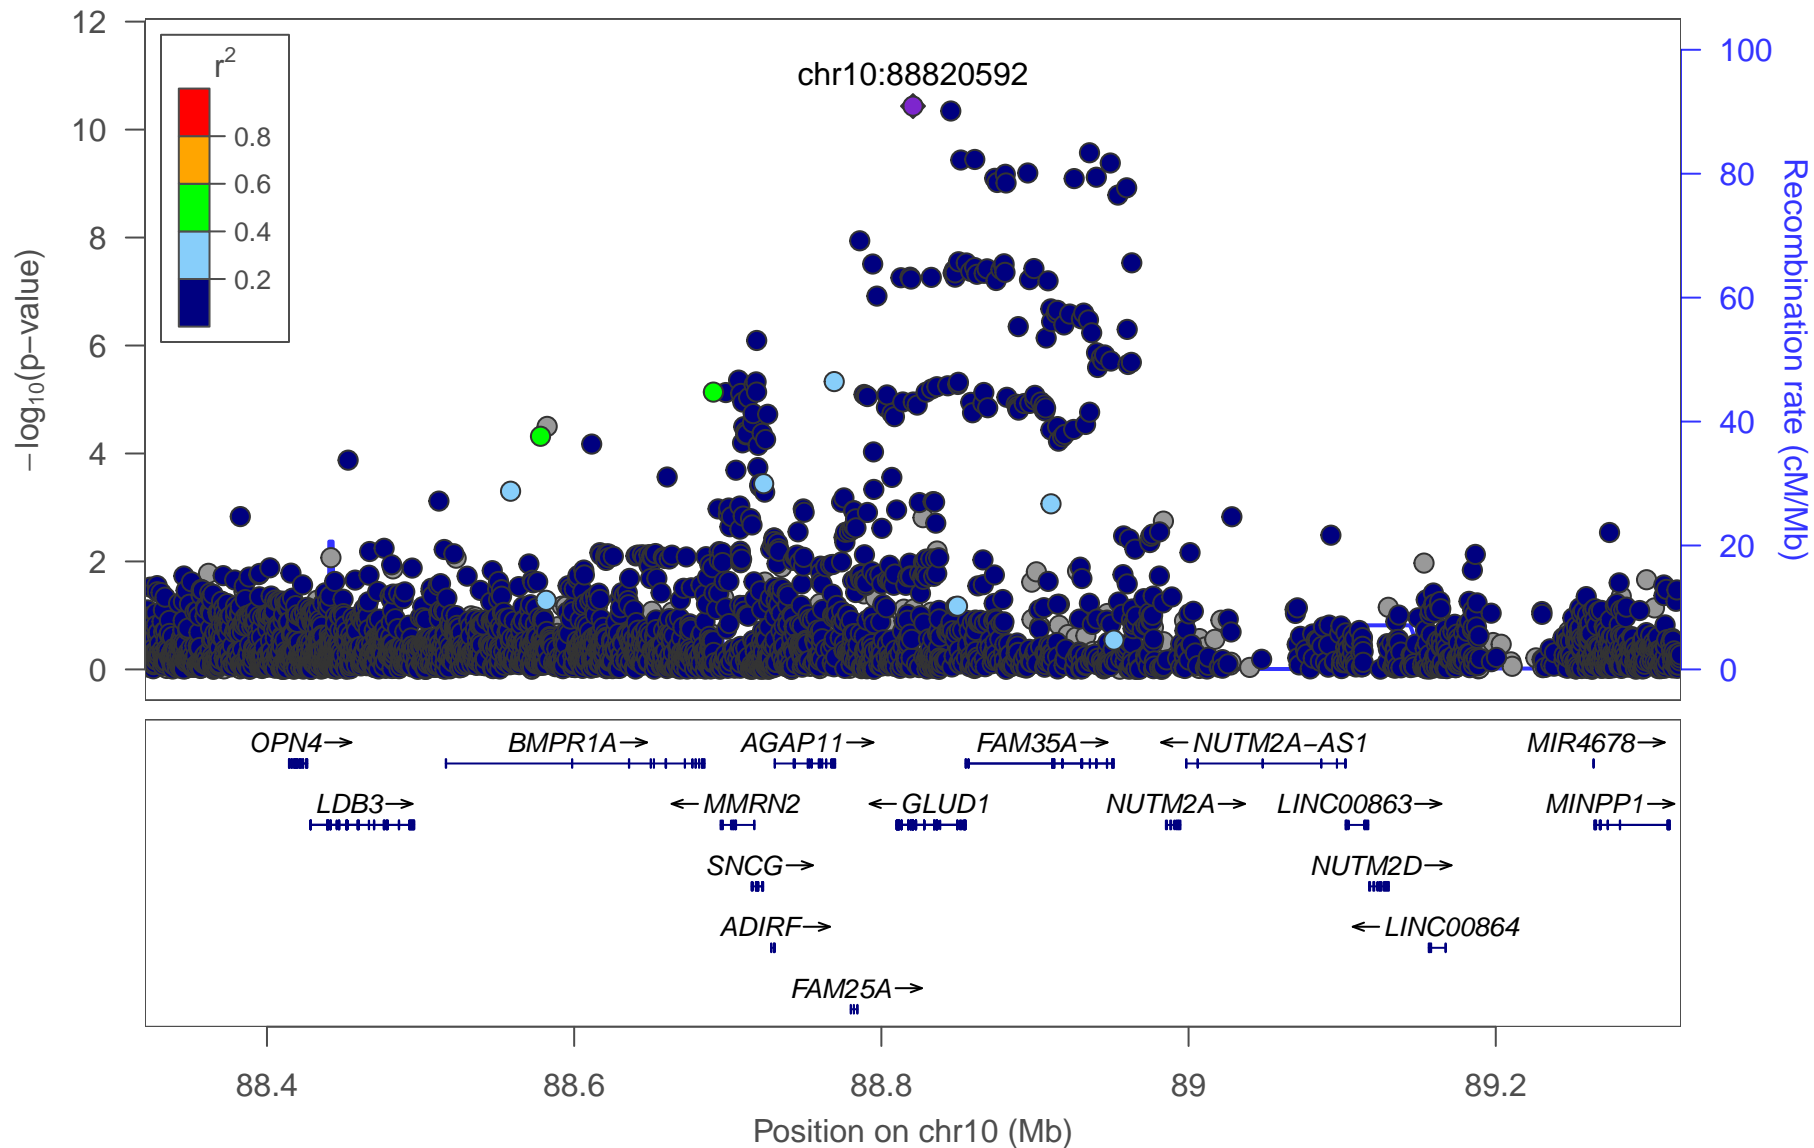

# 10\_10:S-VLDL-L

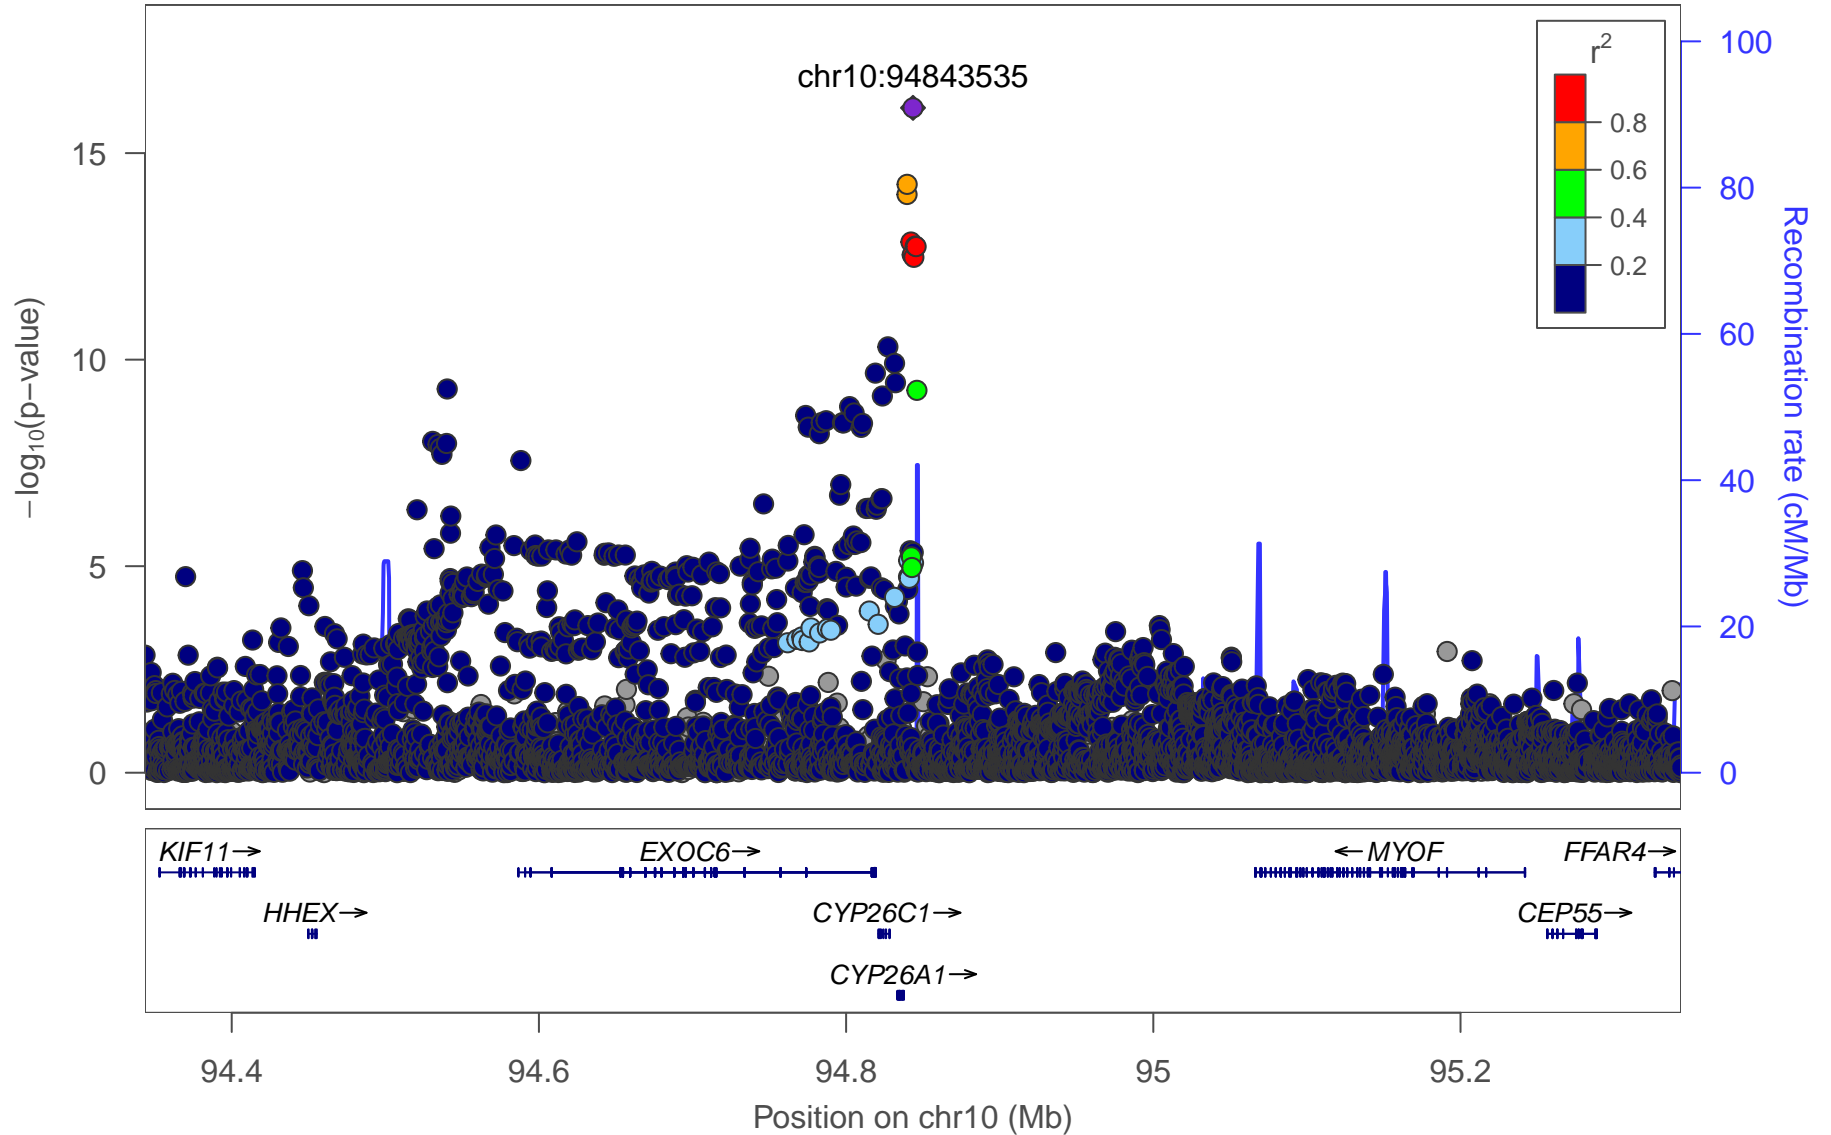

# 10\_11:Gln

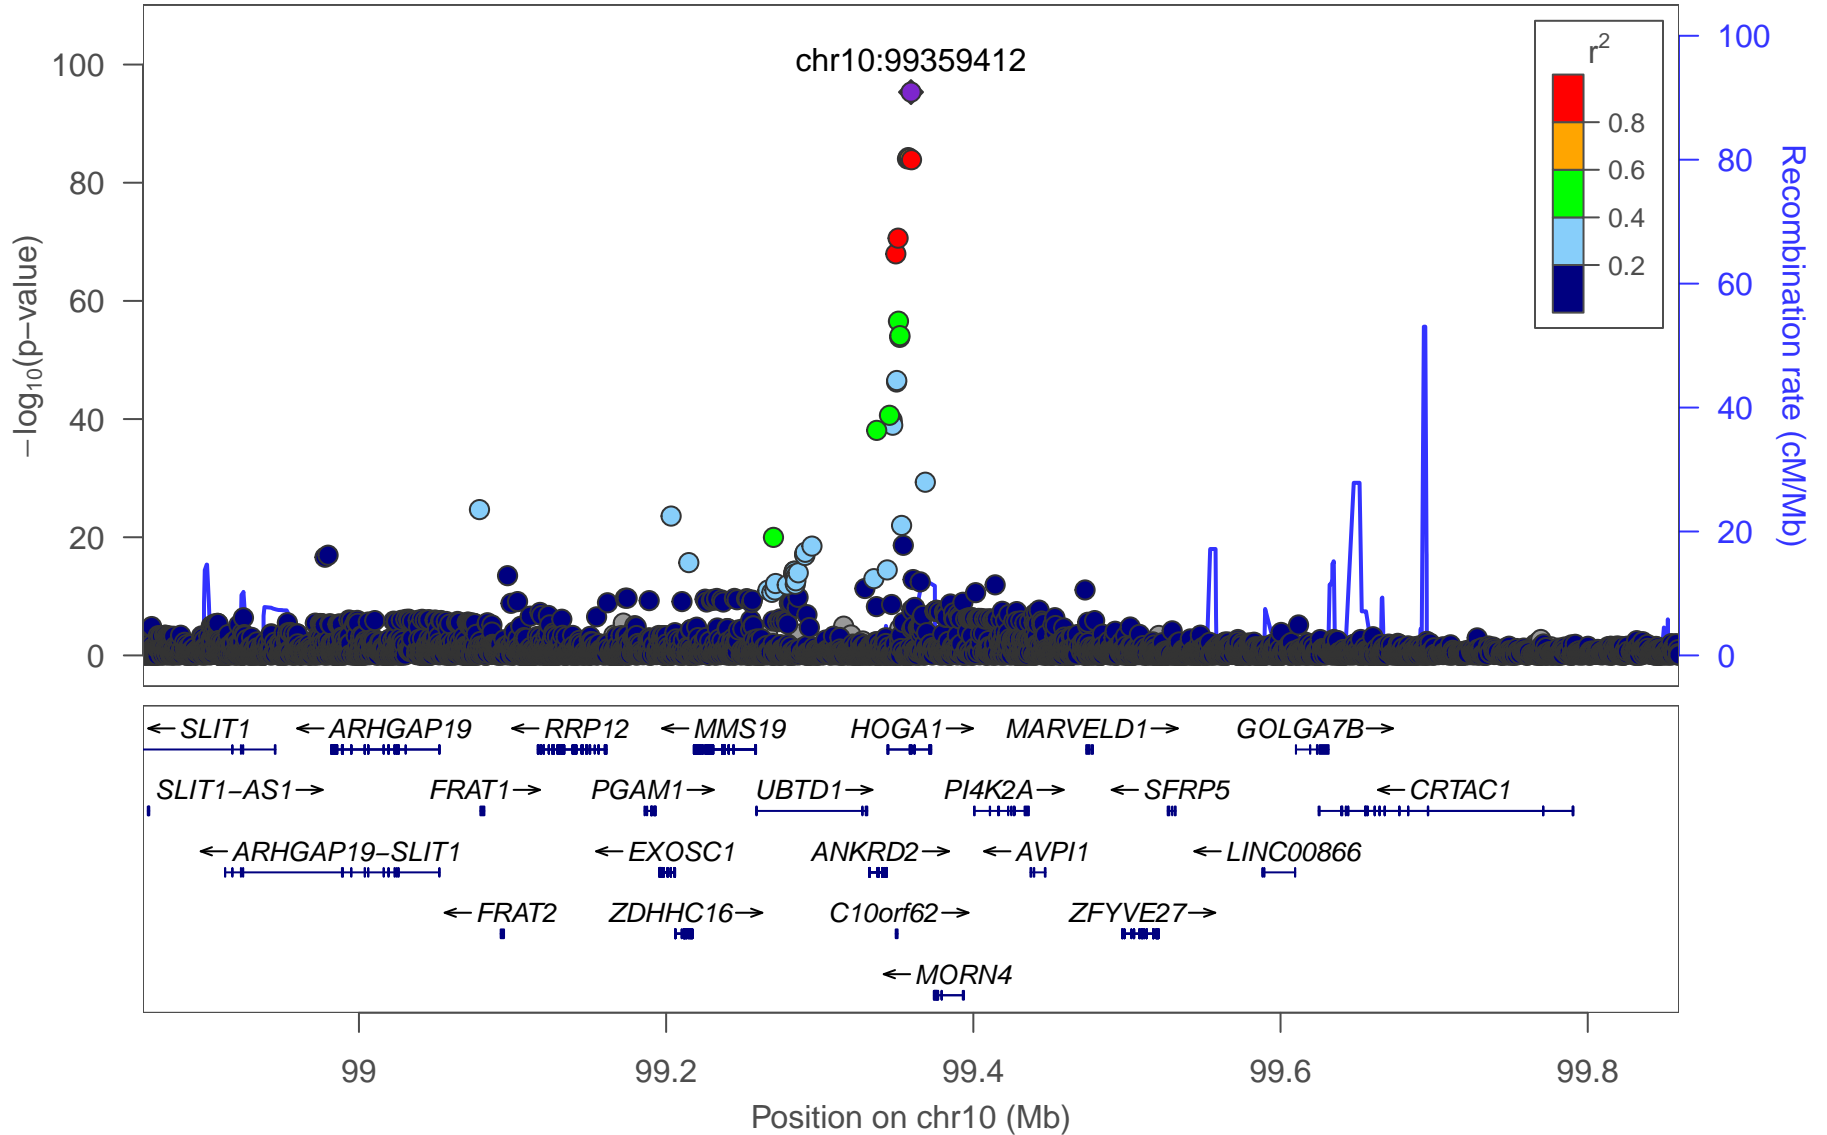

# 10\_12:SFAbbyFA

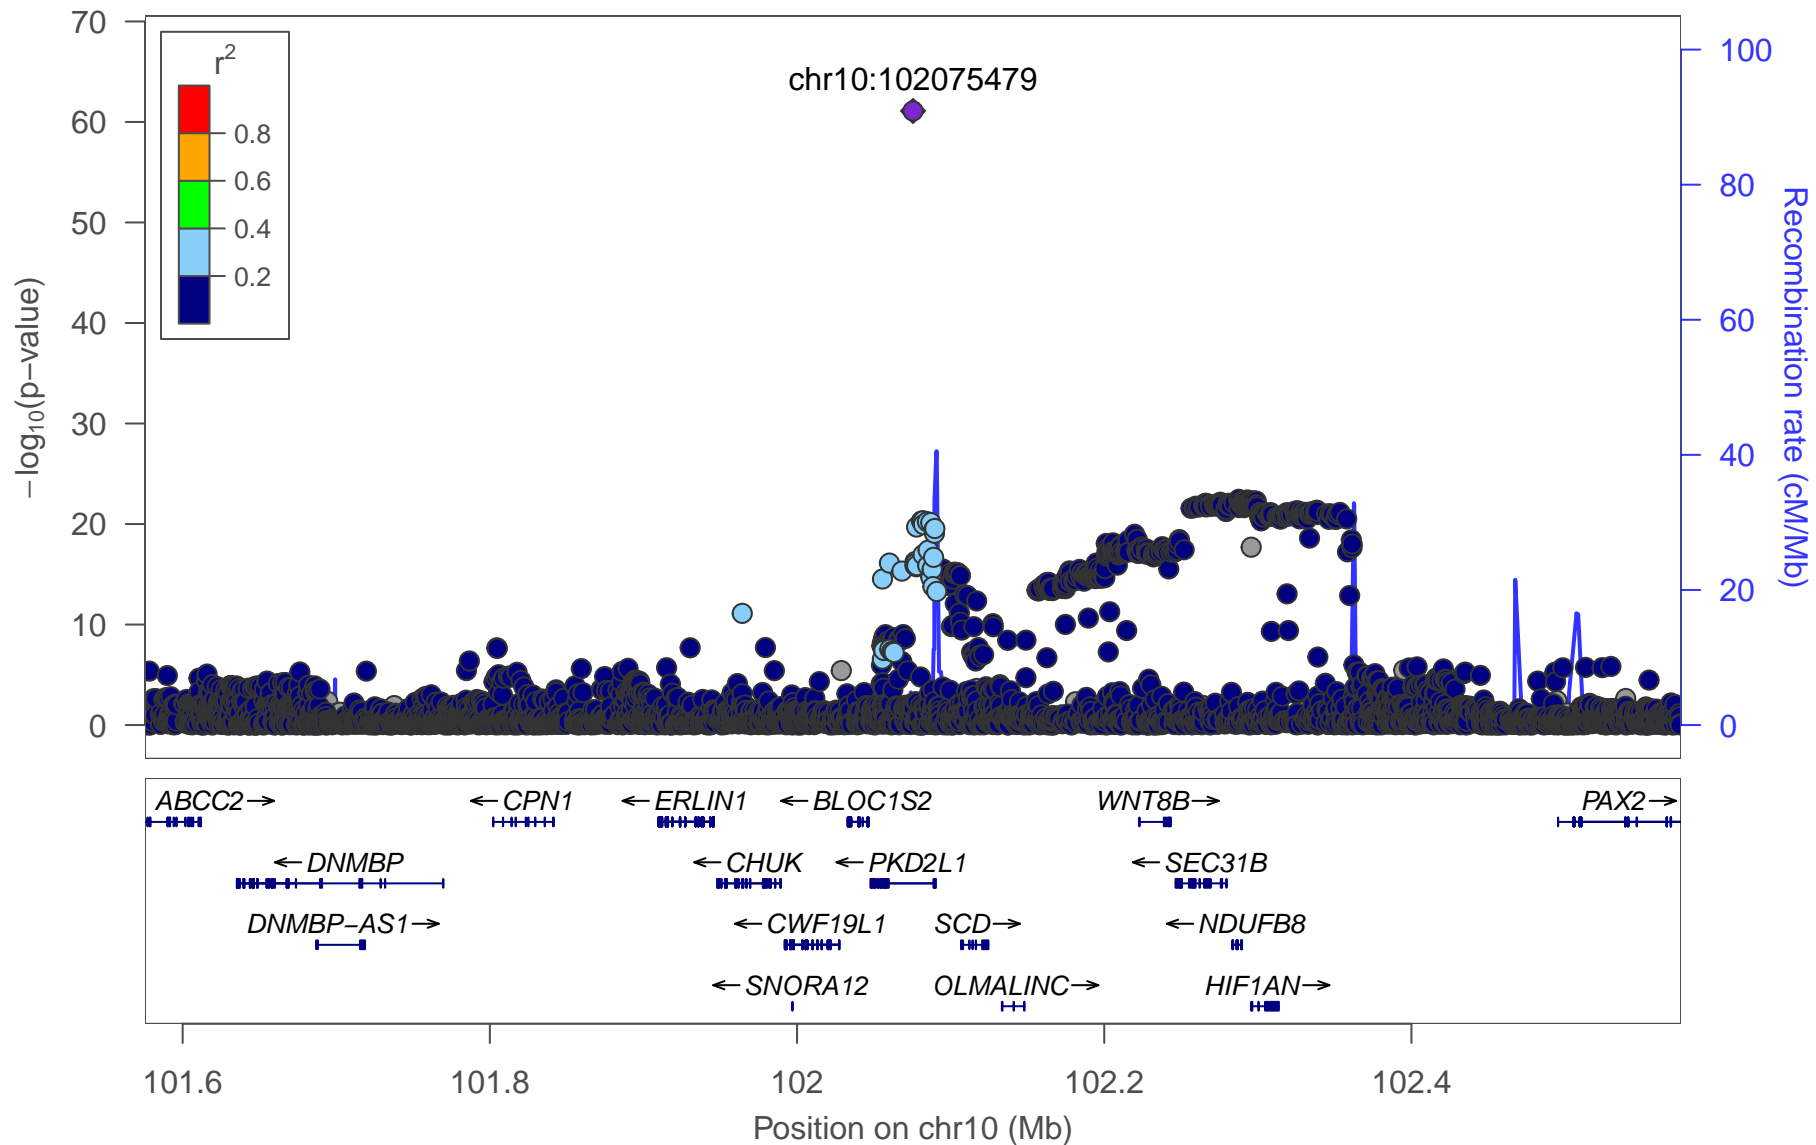

# 10\_13:S-HDL-C\_percent

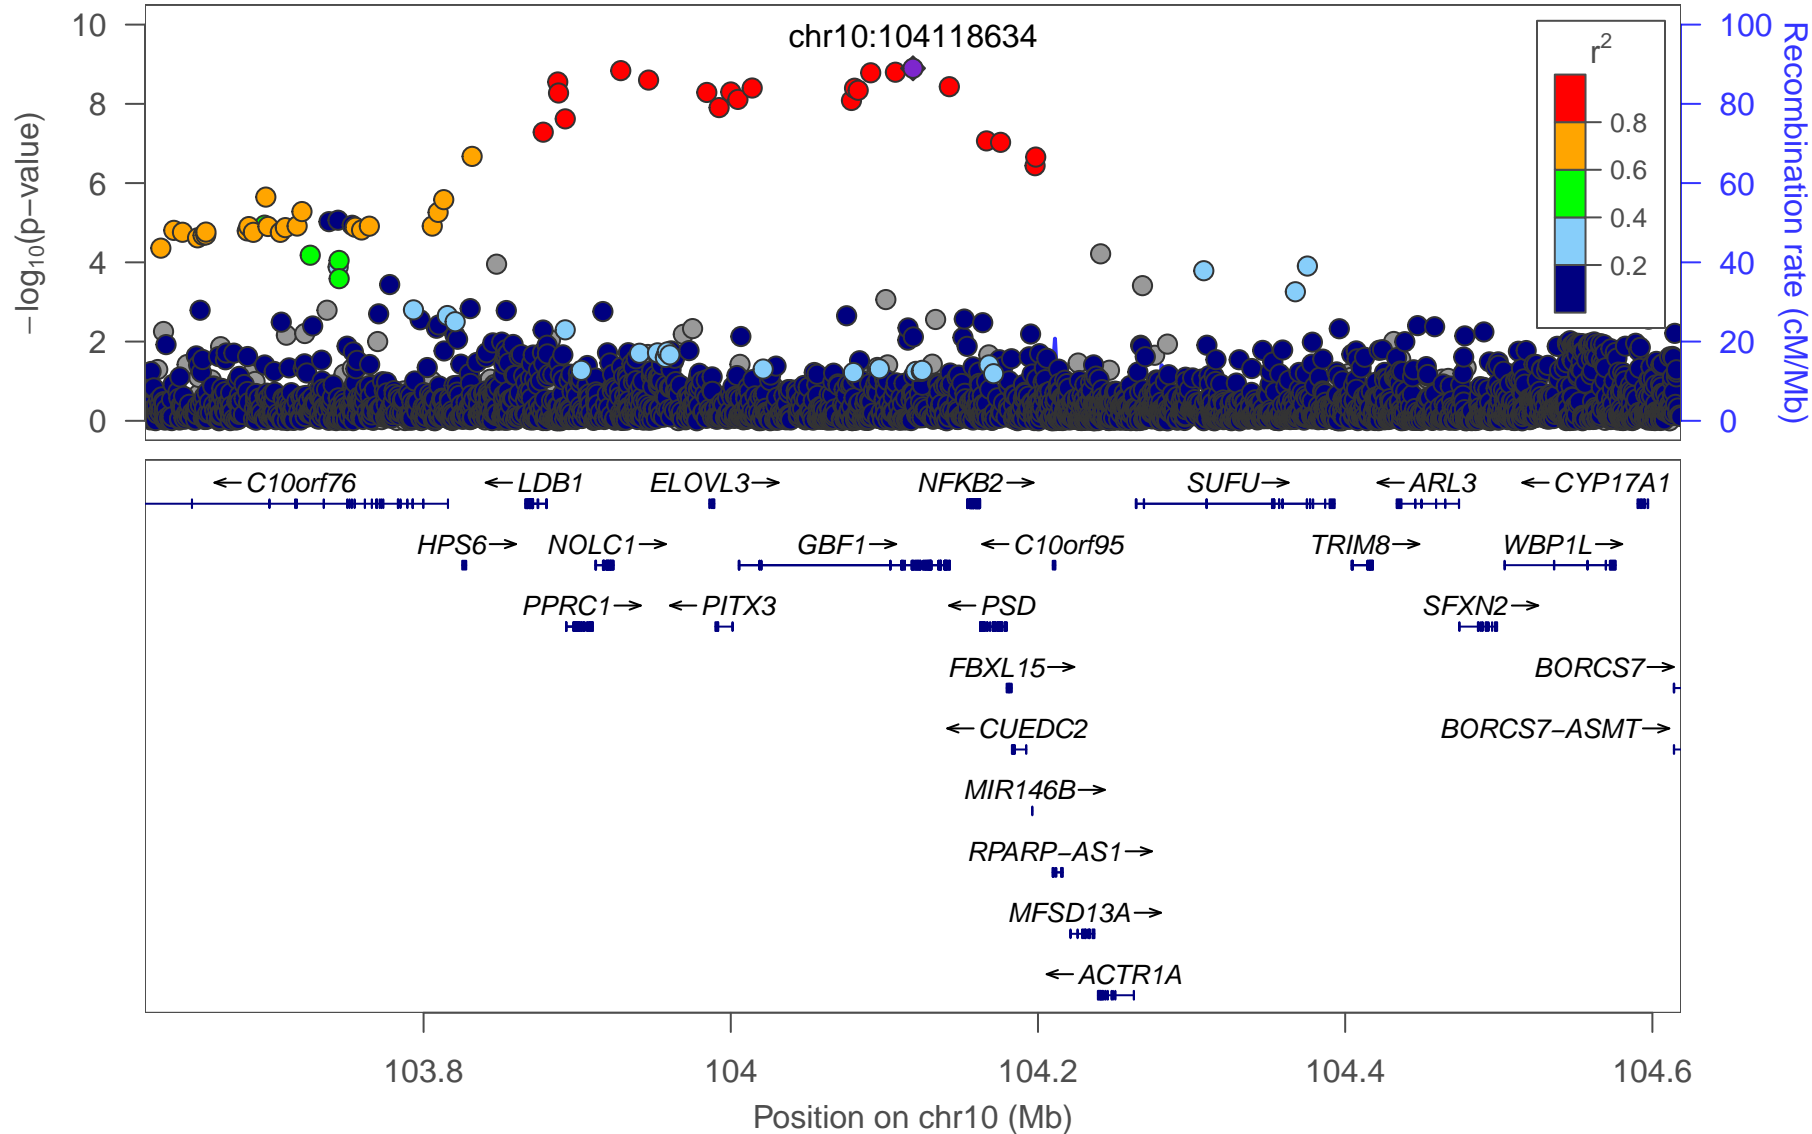

# 10\_14:HDL-C

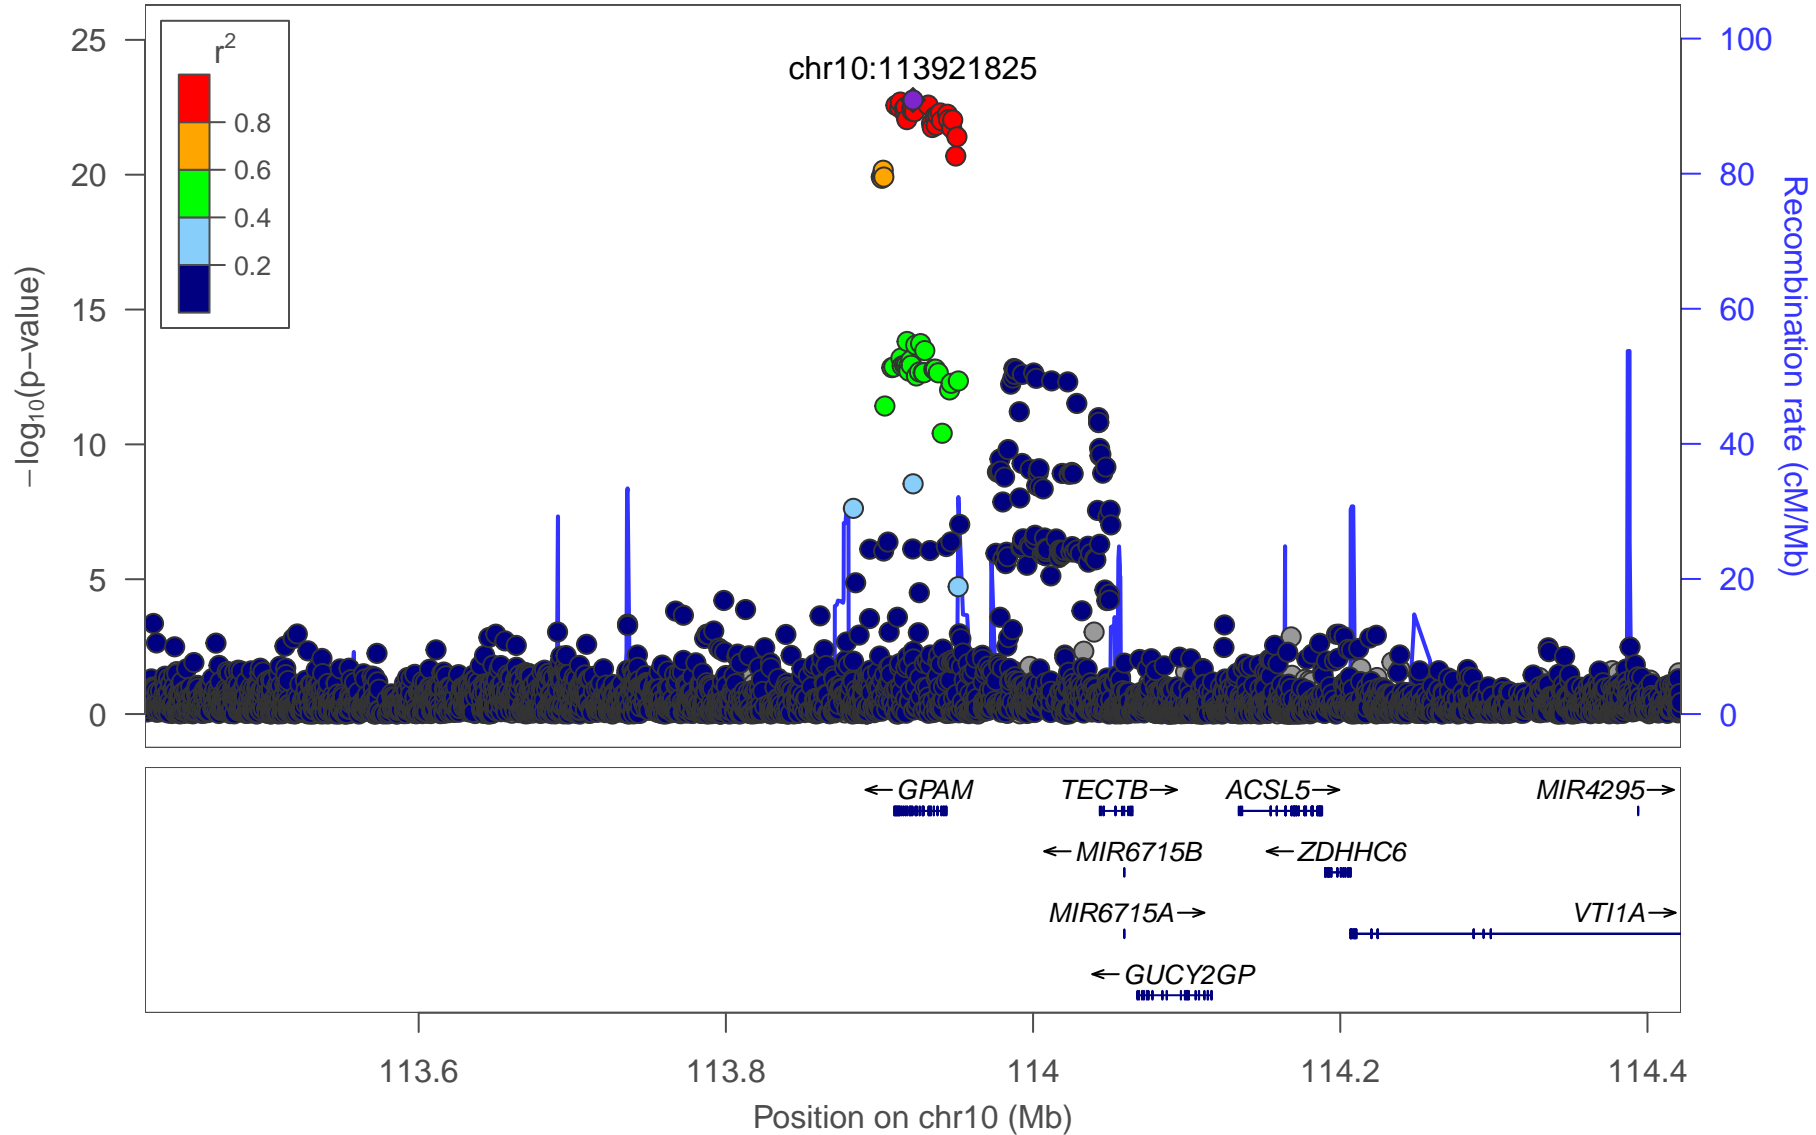

# 10\_15:DHA

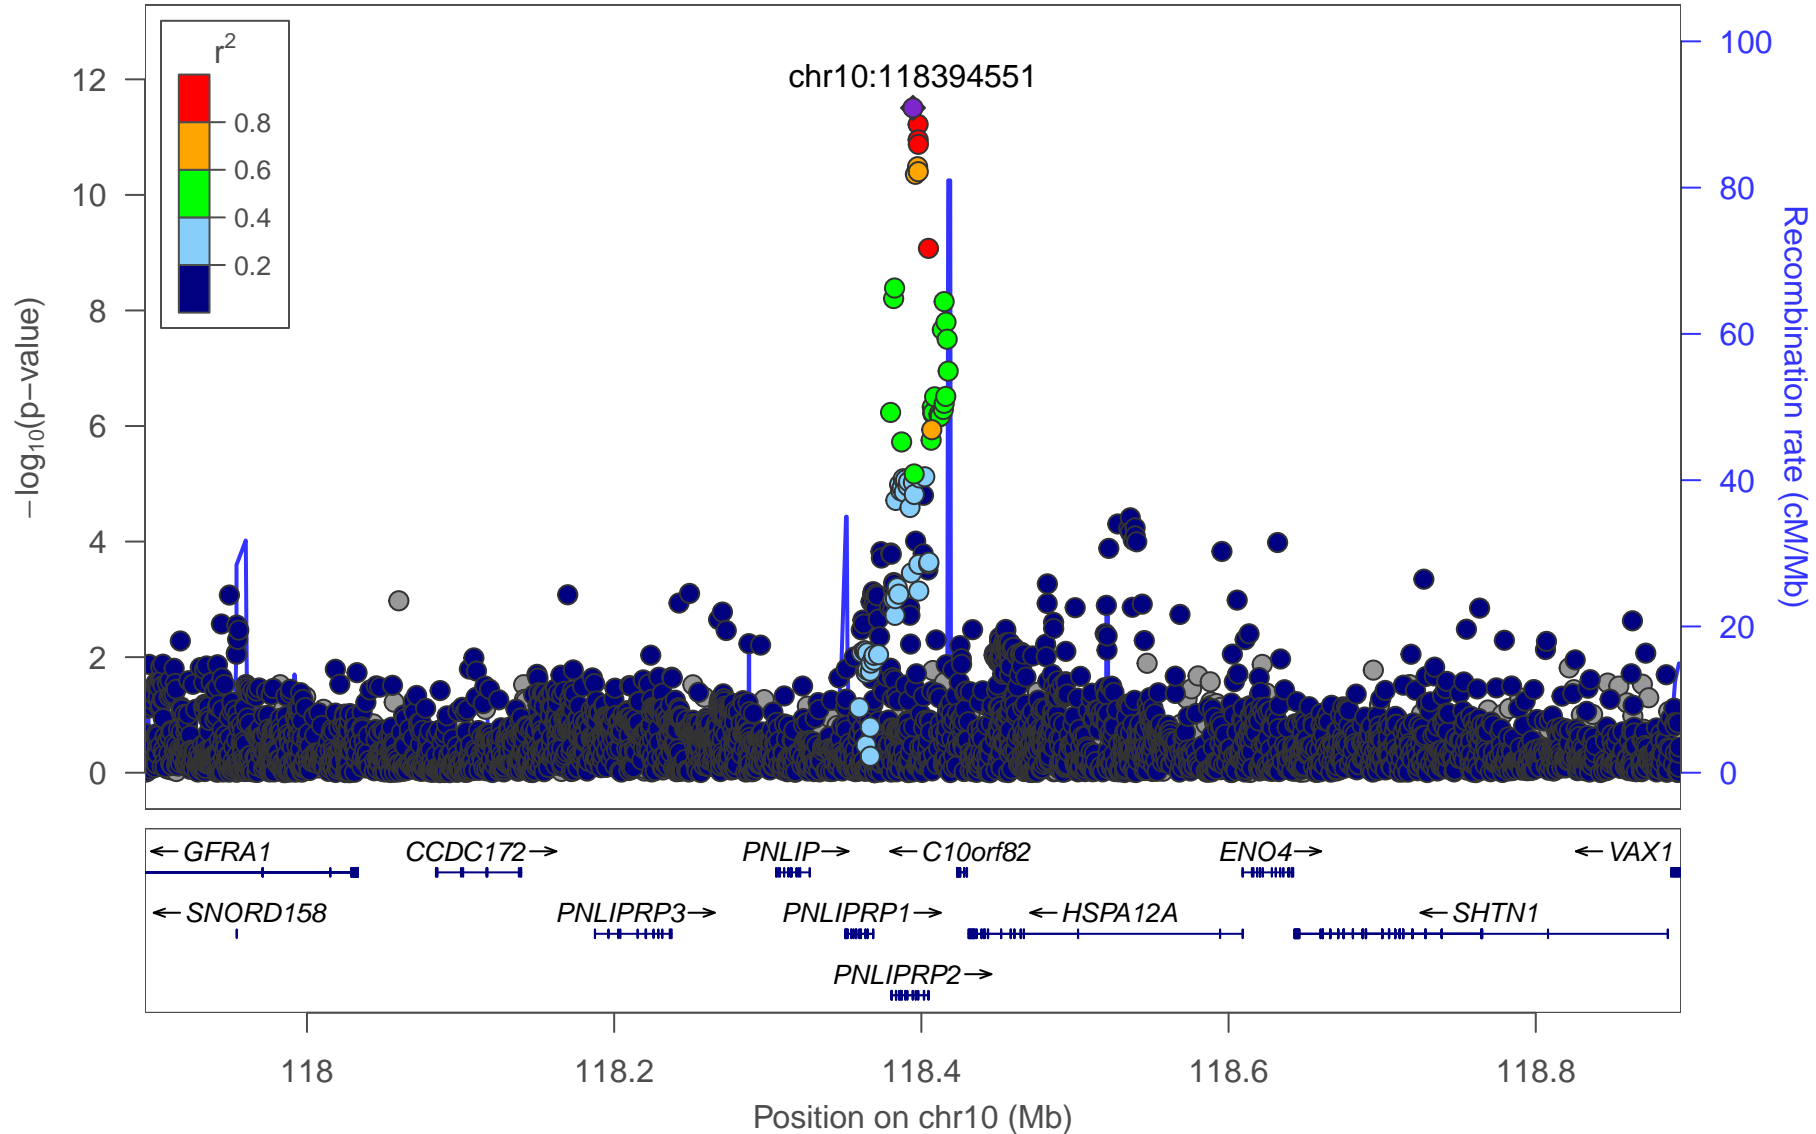

# 10\_16:L-VLDL-PL\_percent

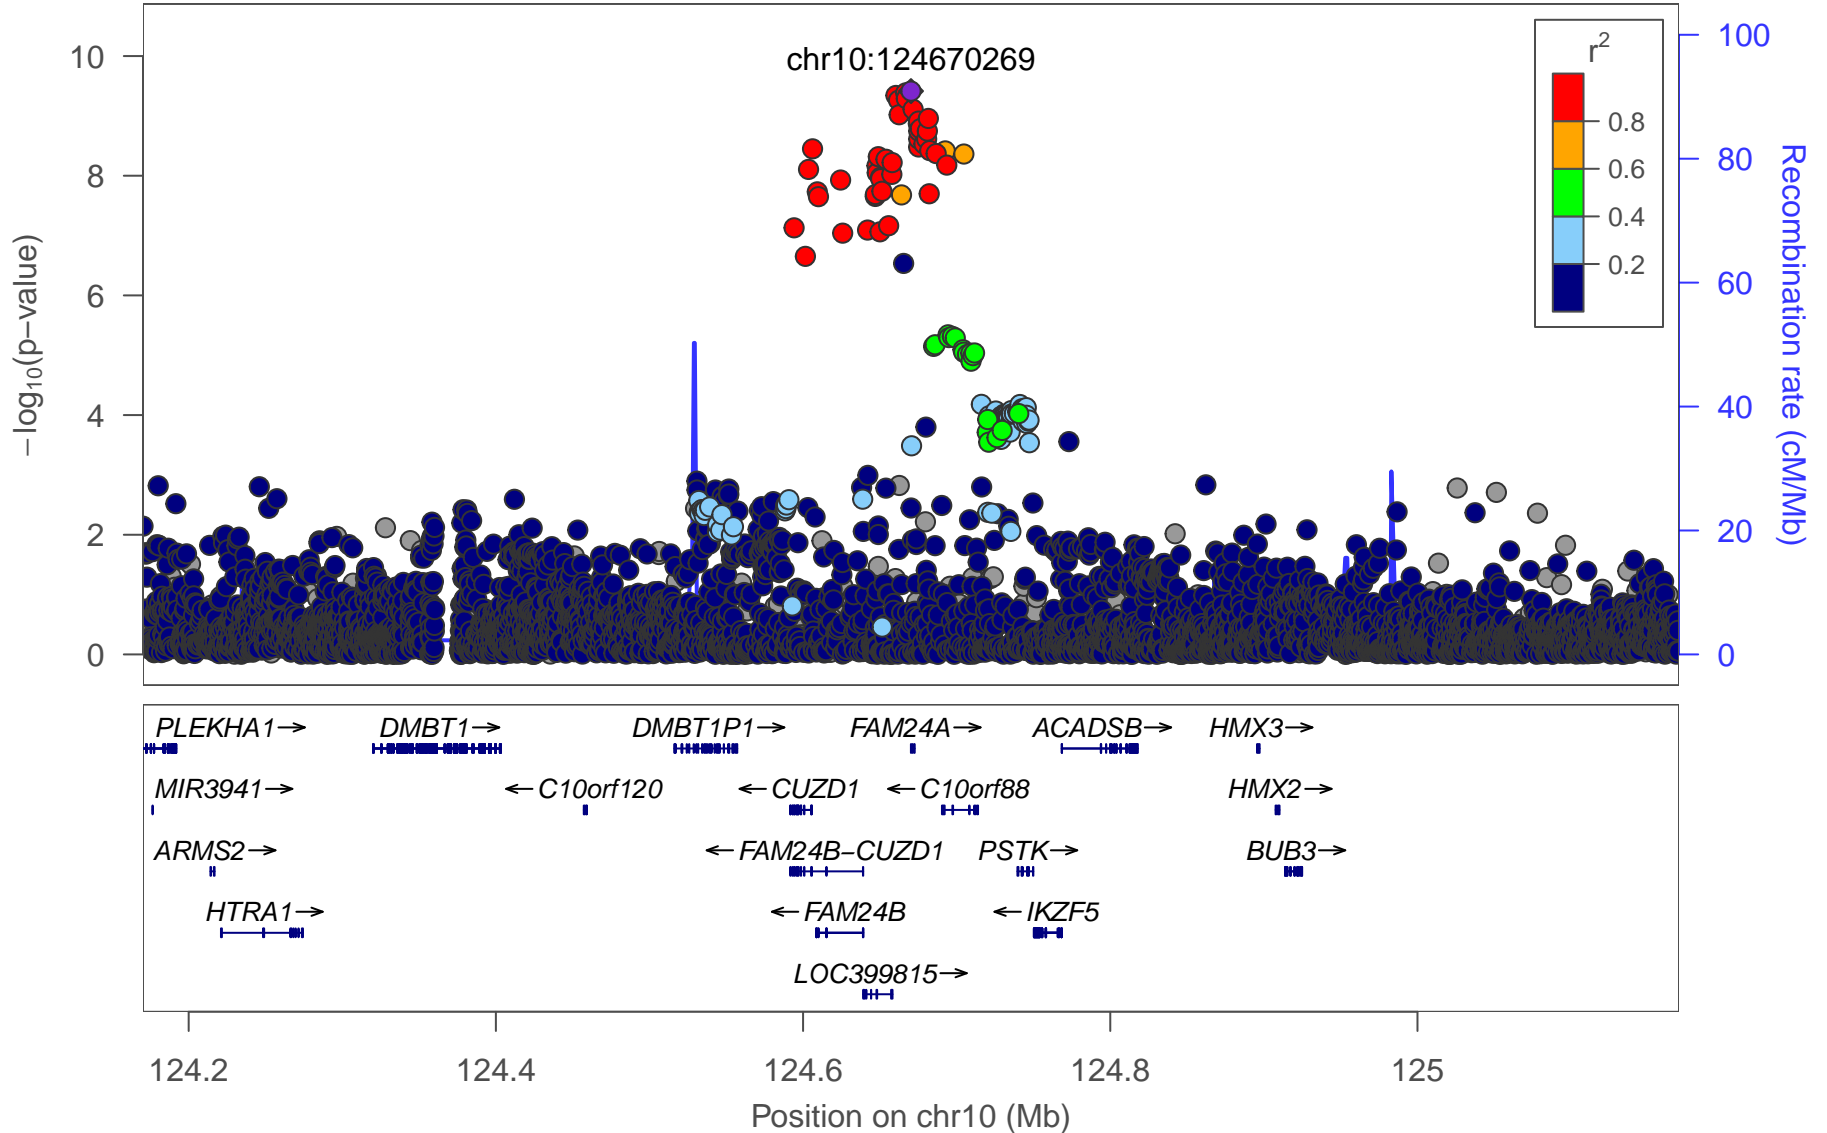



# 10\_17:Acetone

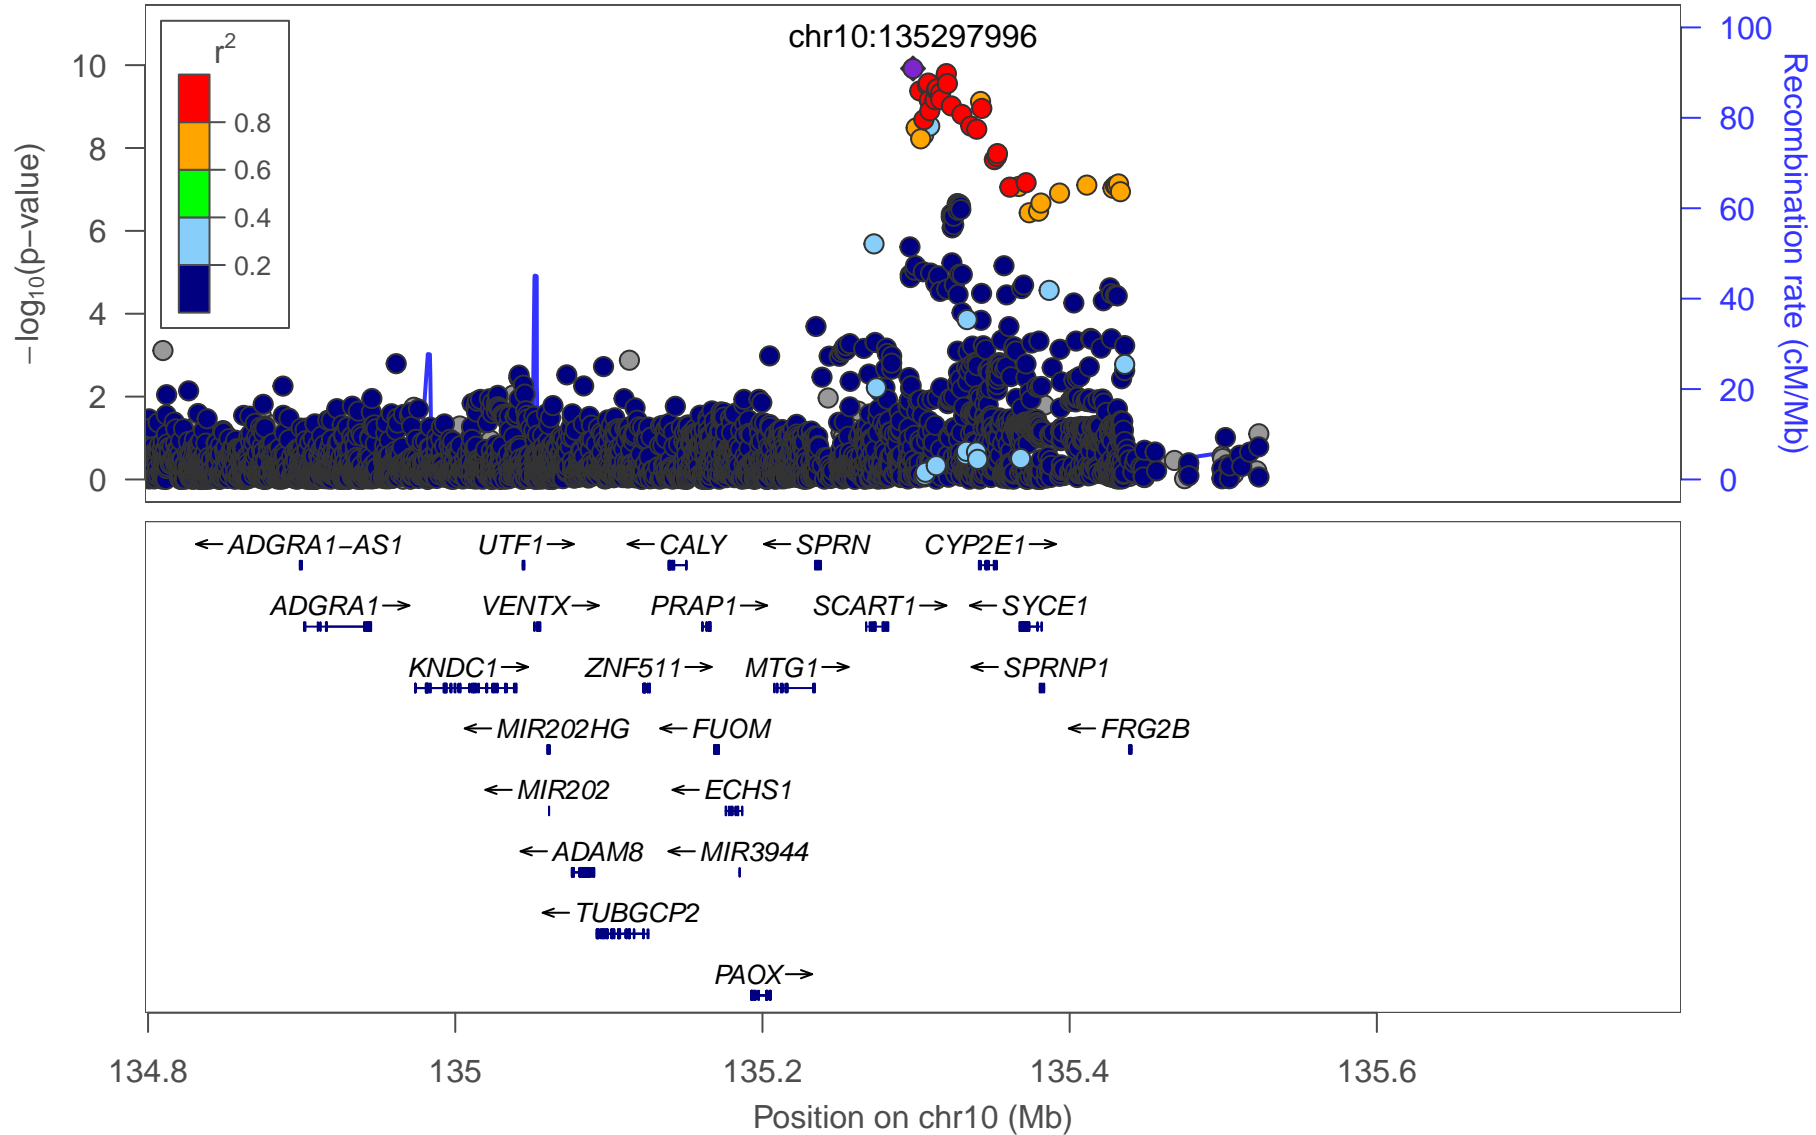

# 11\_1:Glc

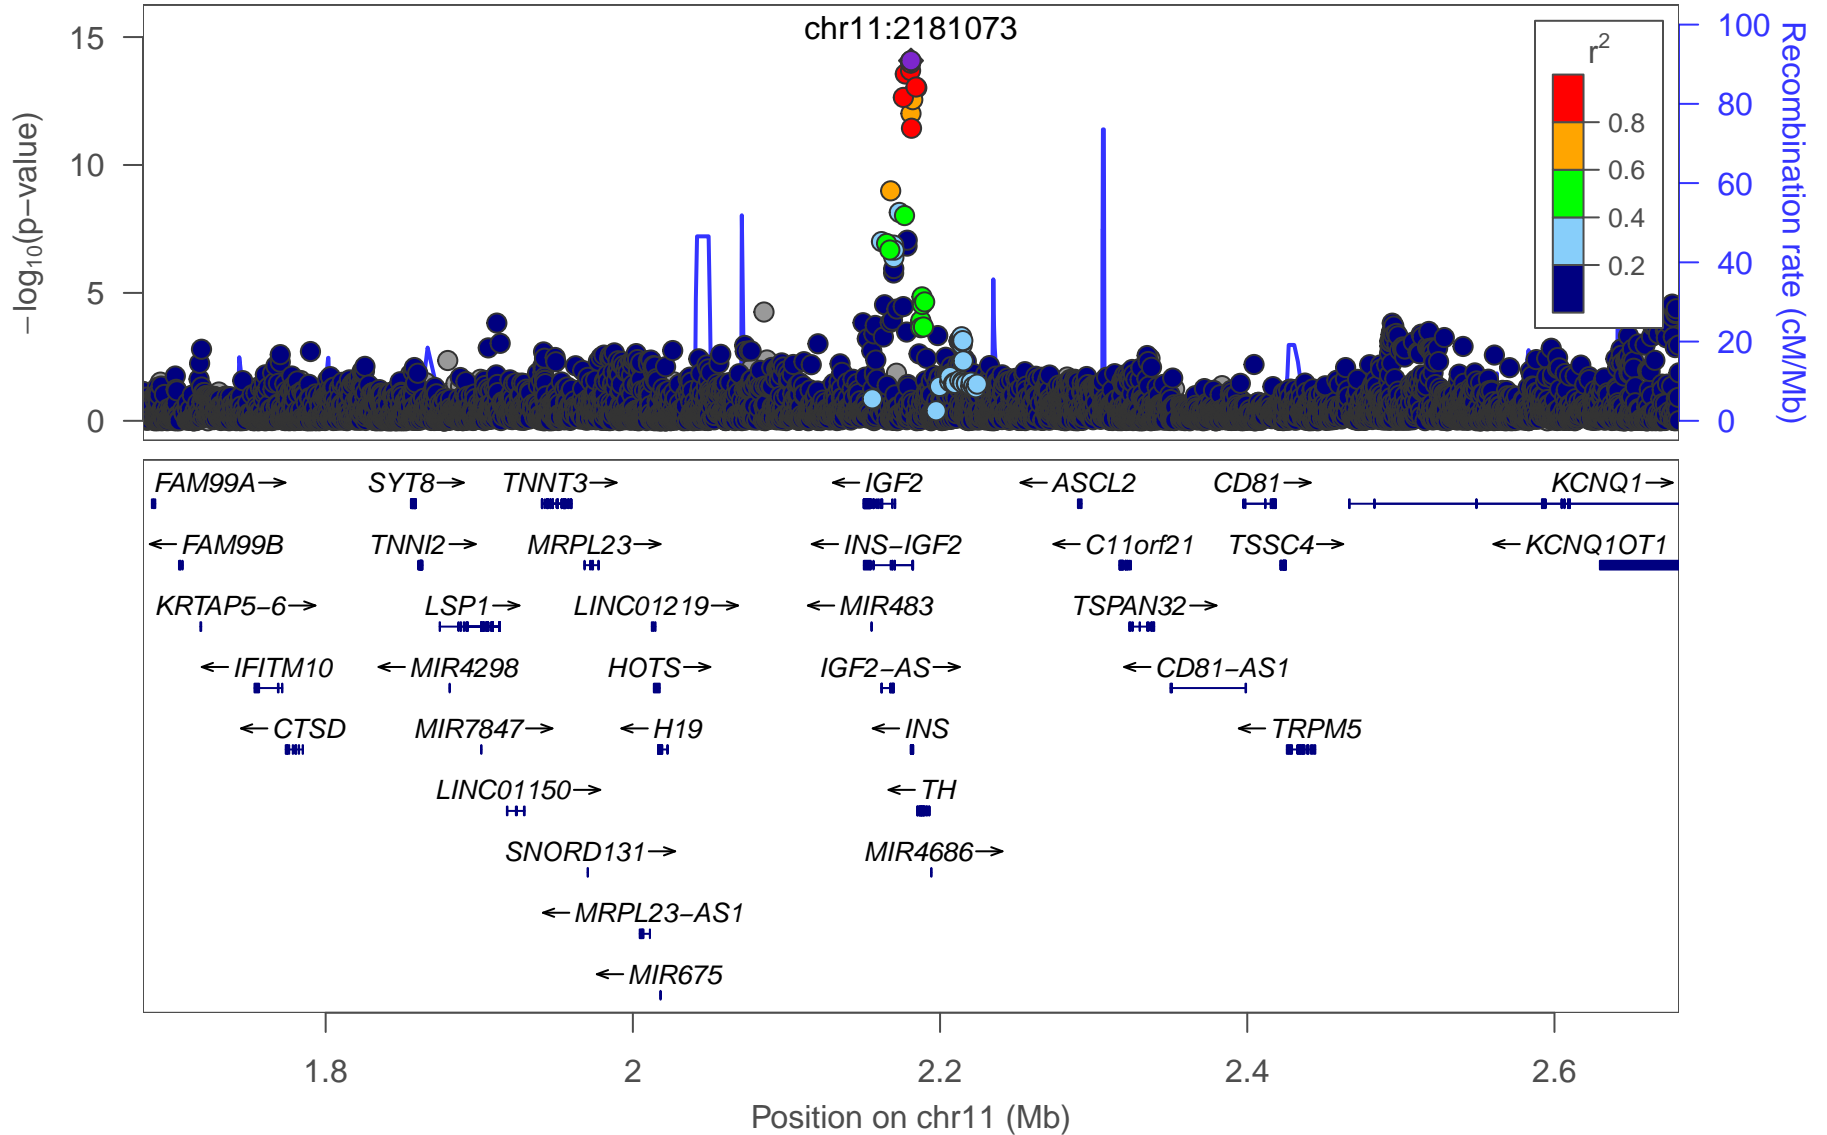

# 11\_2:S-LDL-PL\_percent

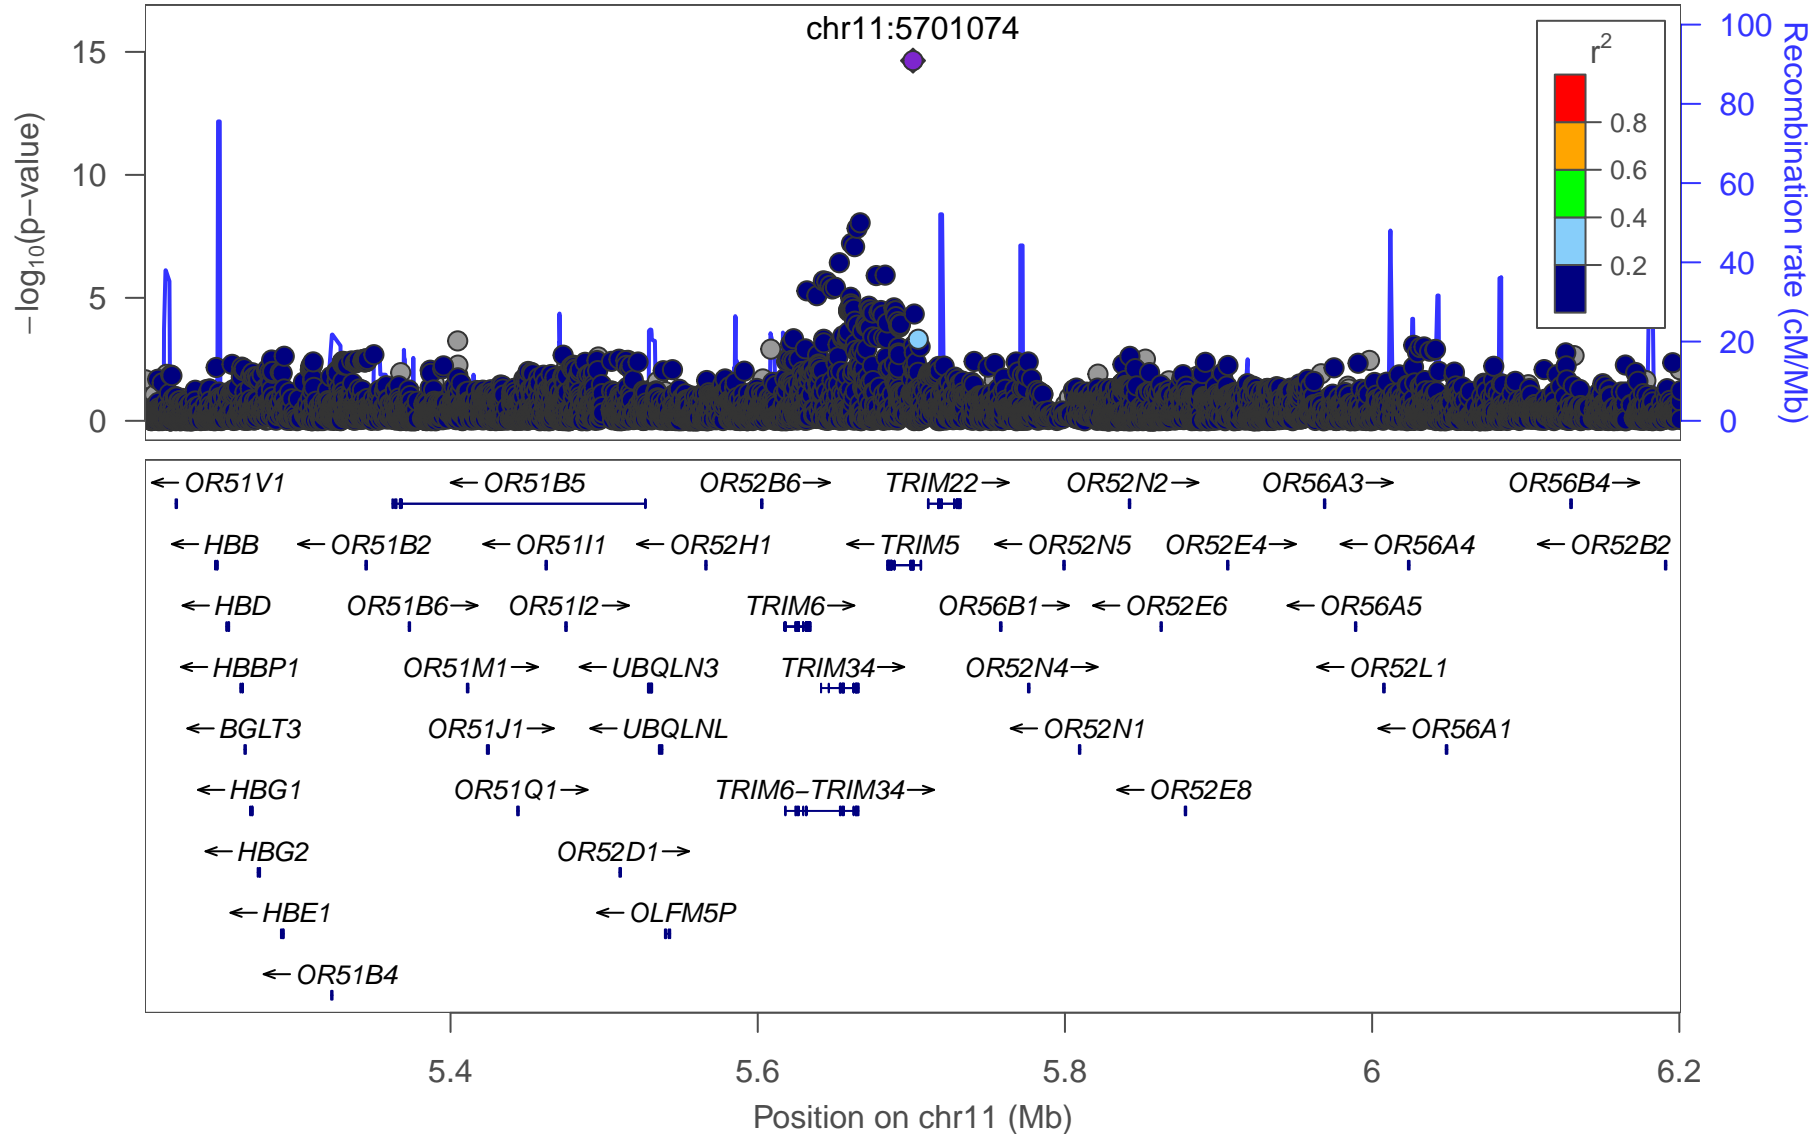

# 11\_3:Gln

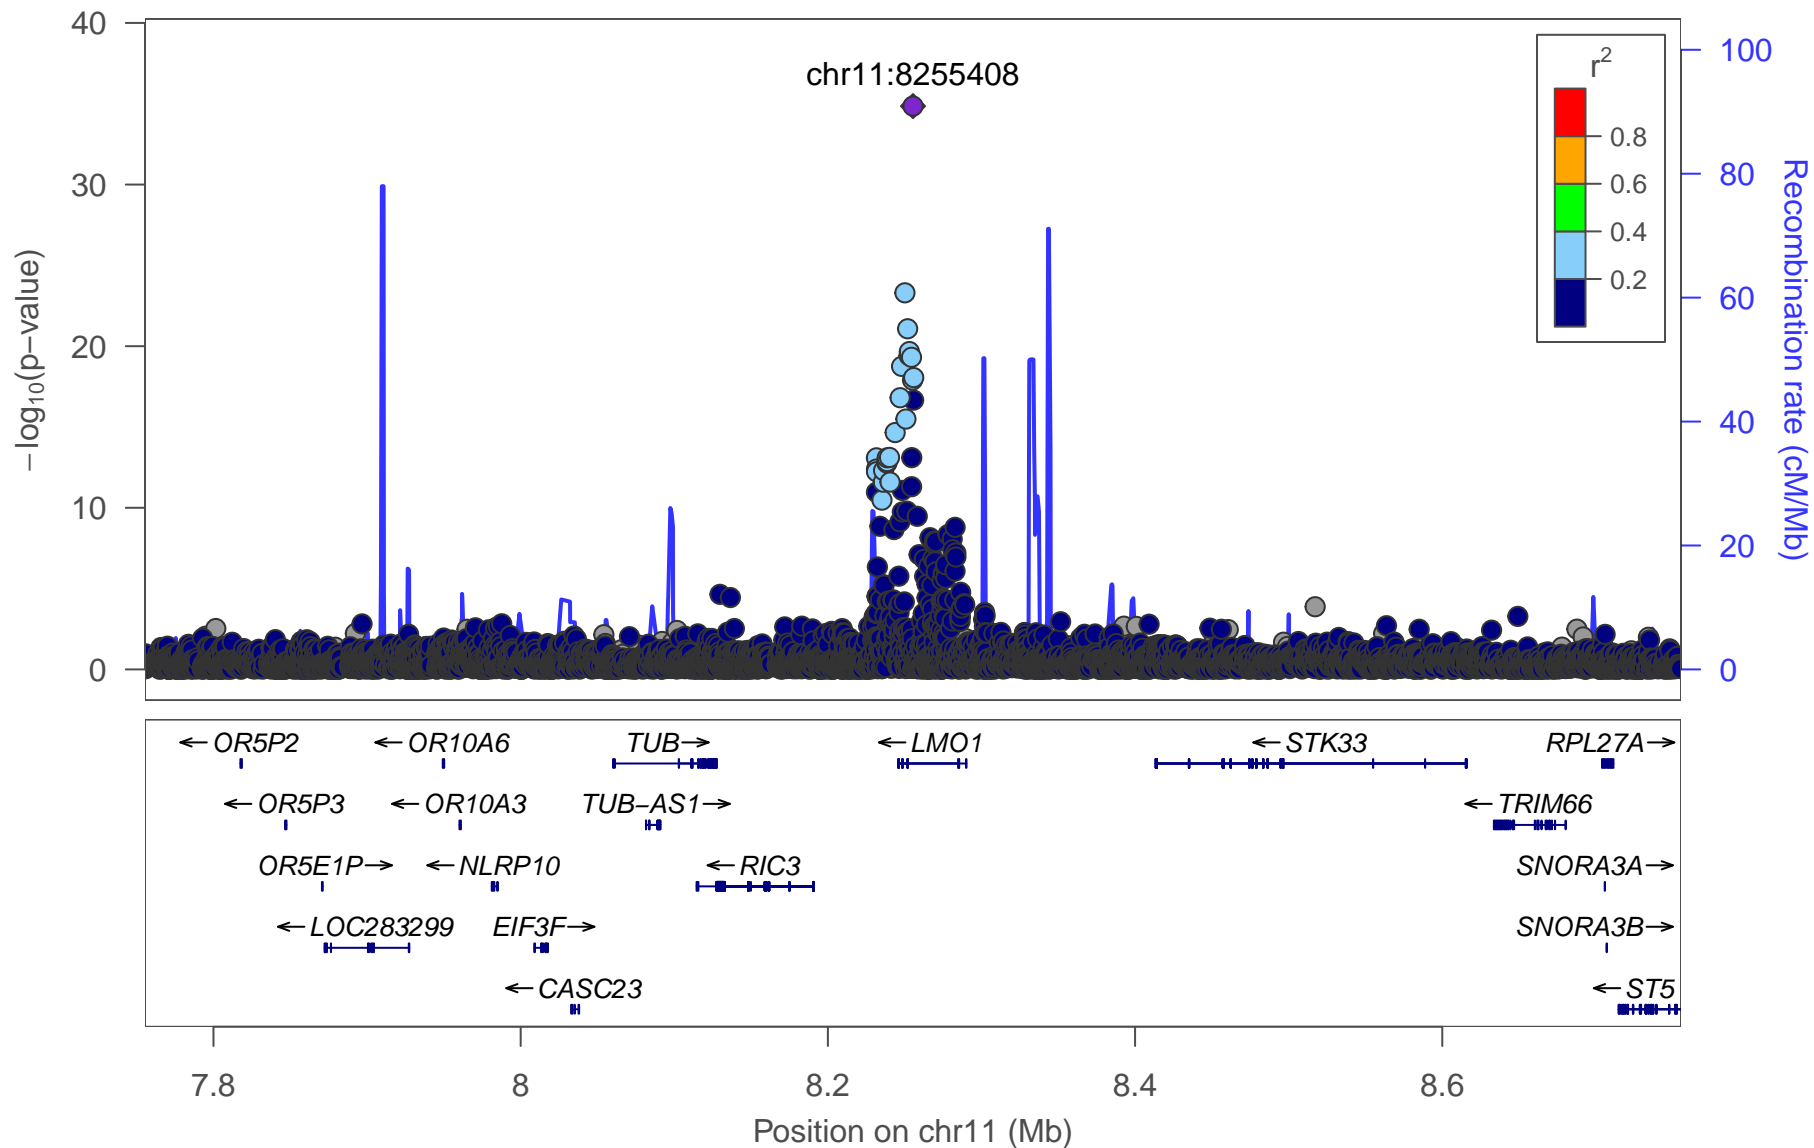

# 11\_4:S-VLDL-TG

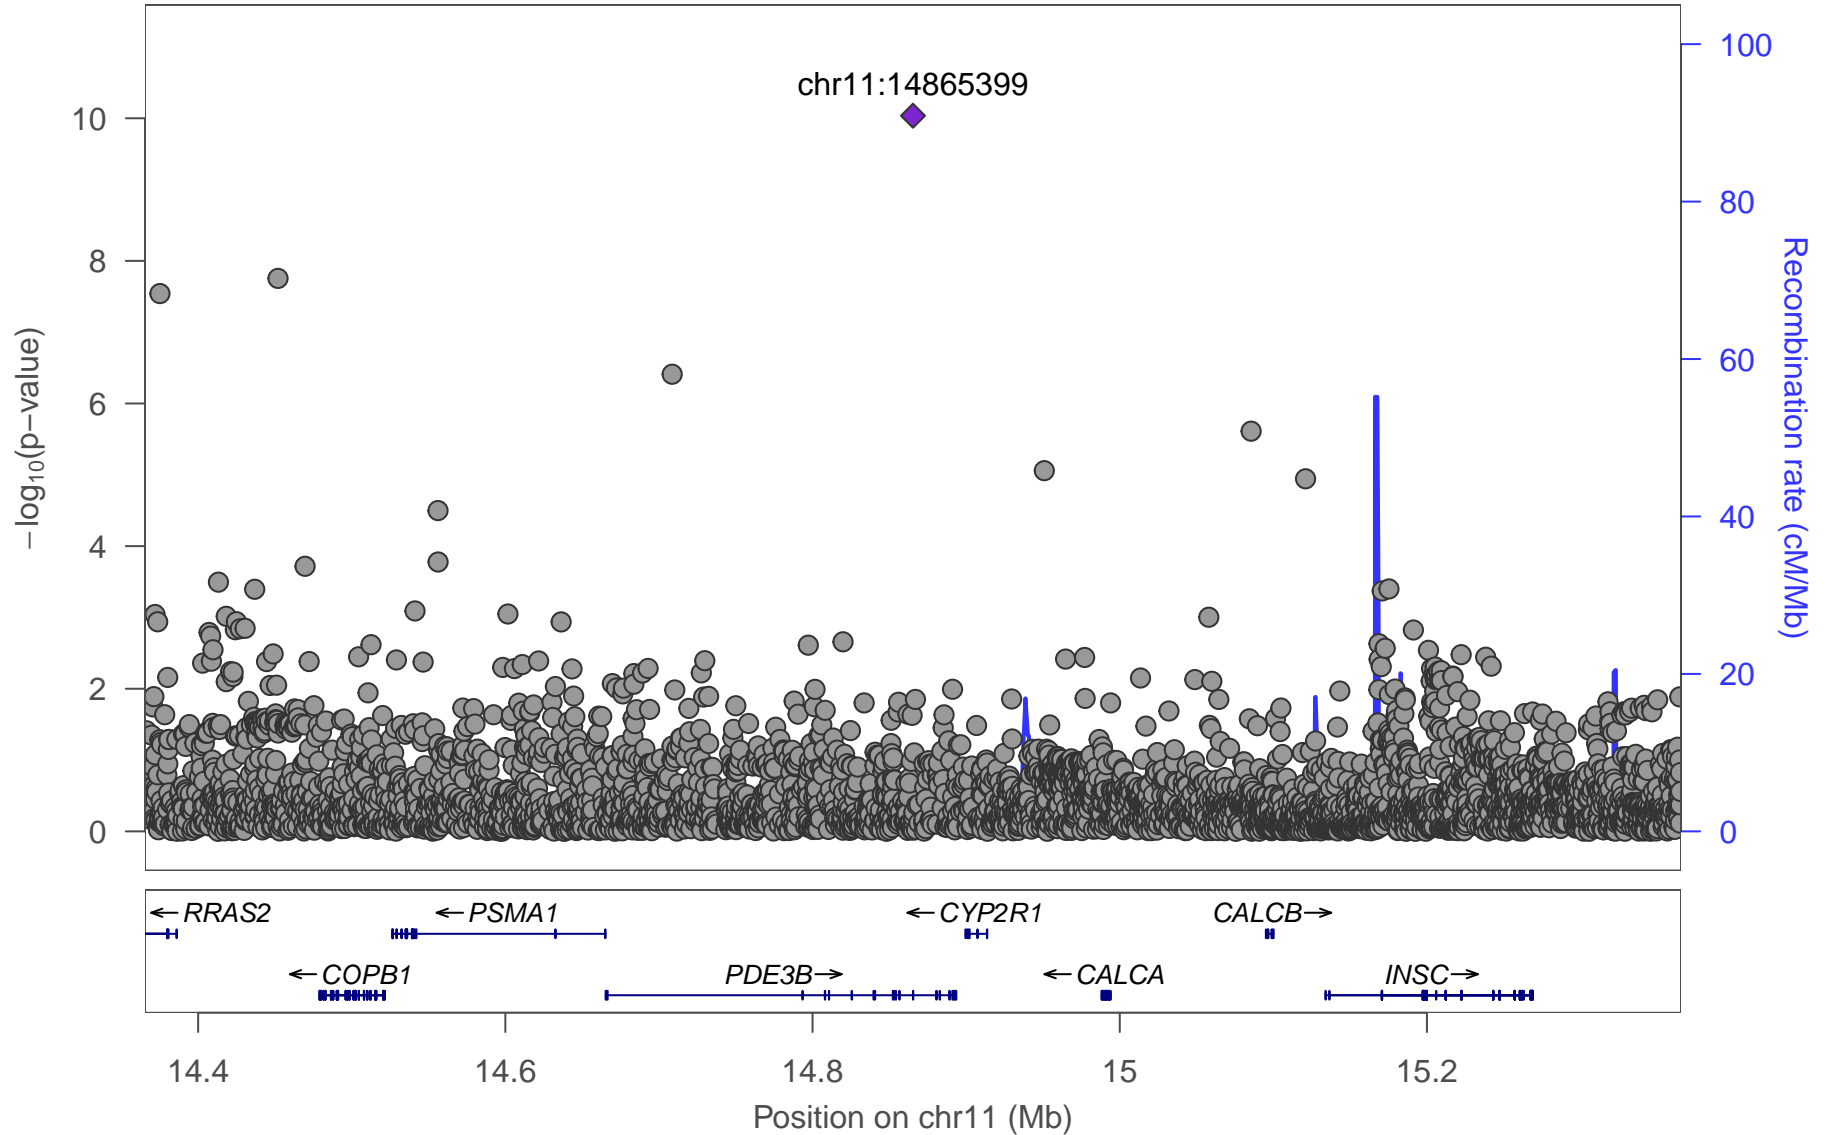

# 11\_5:M-LDL-TG

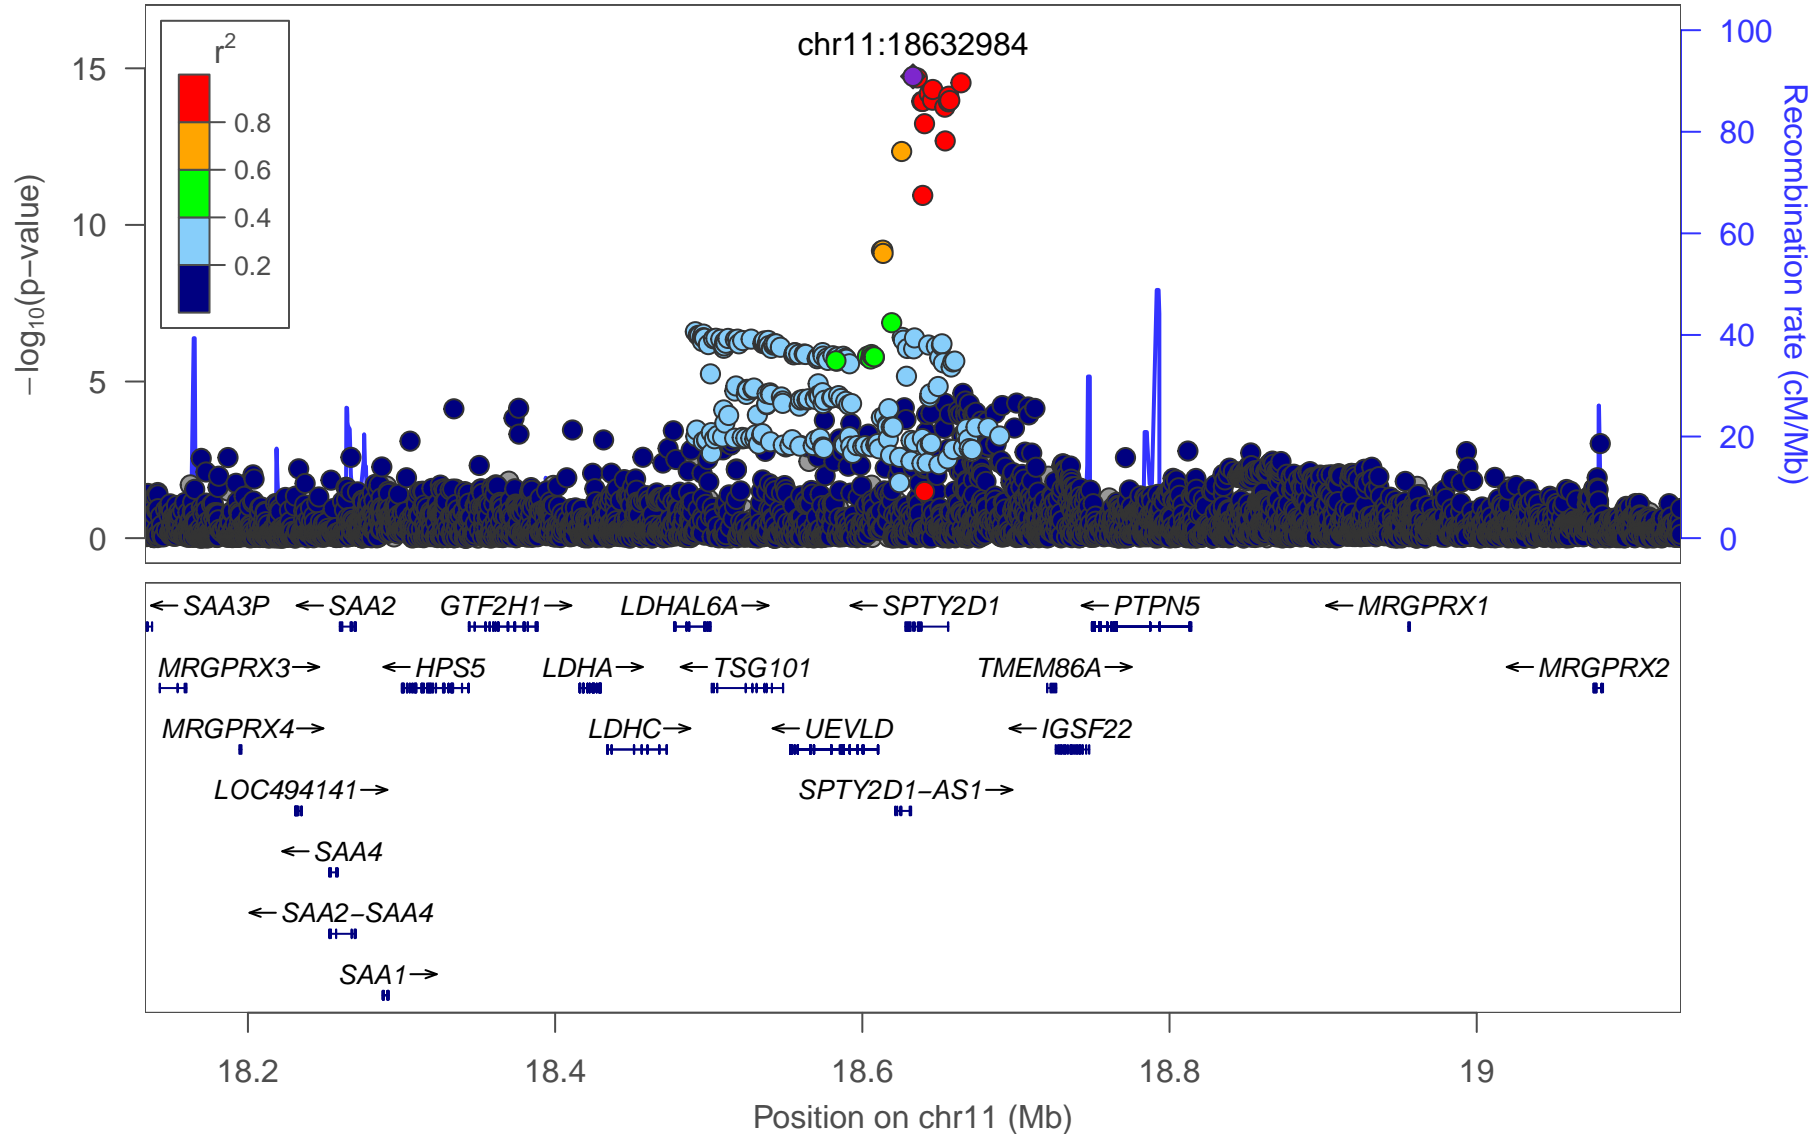

# 11\_6:Crea

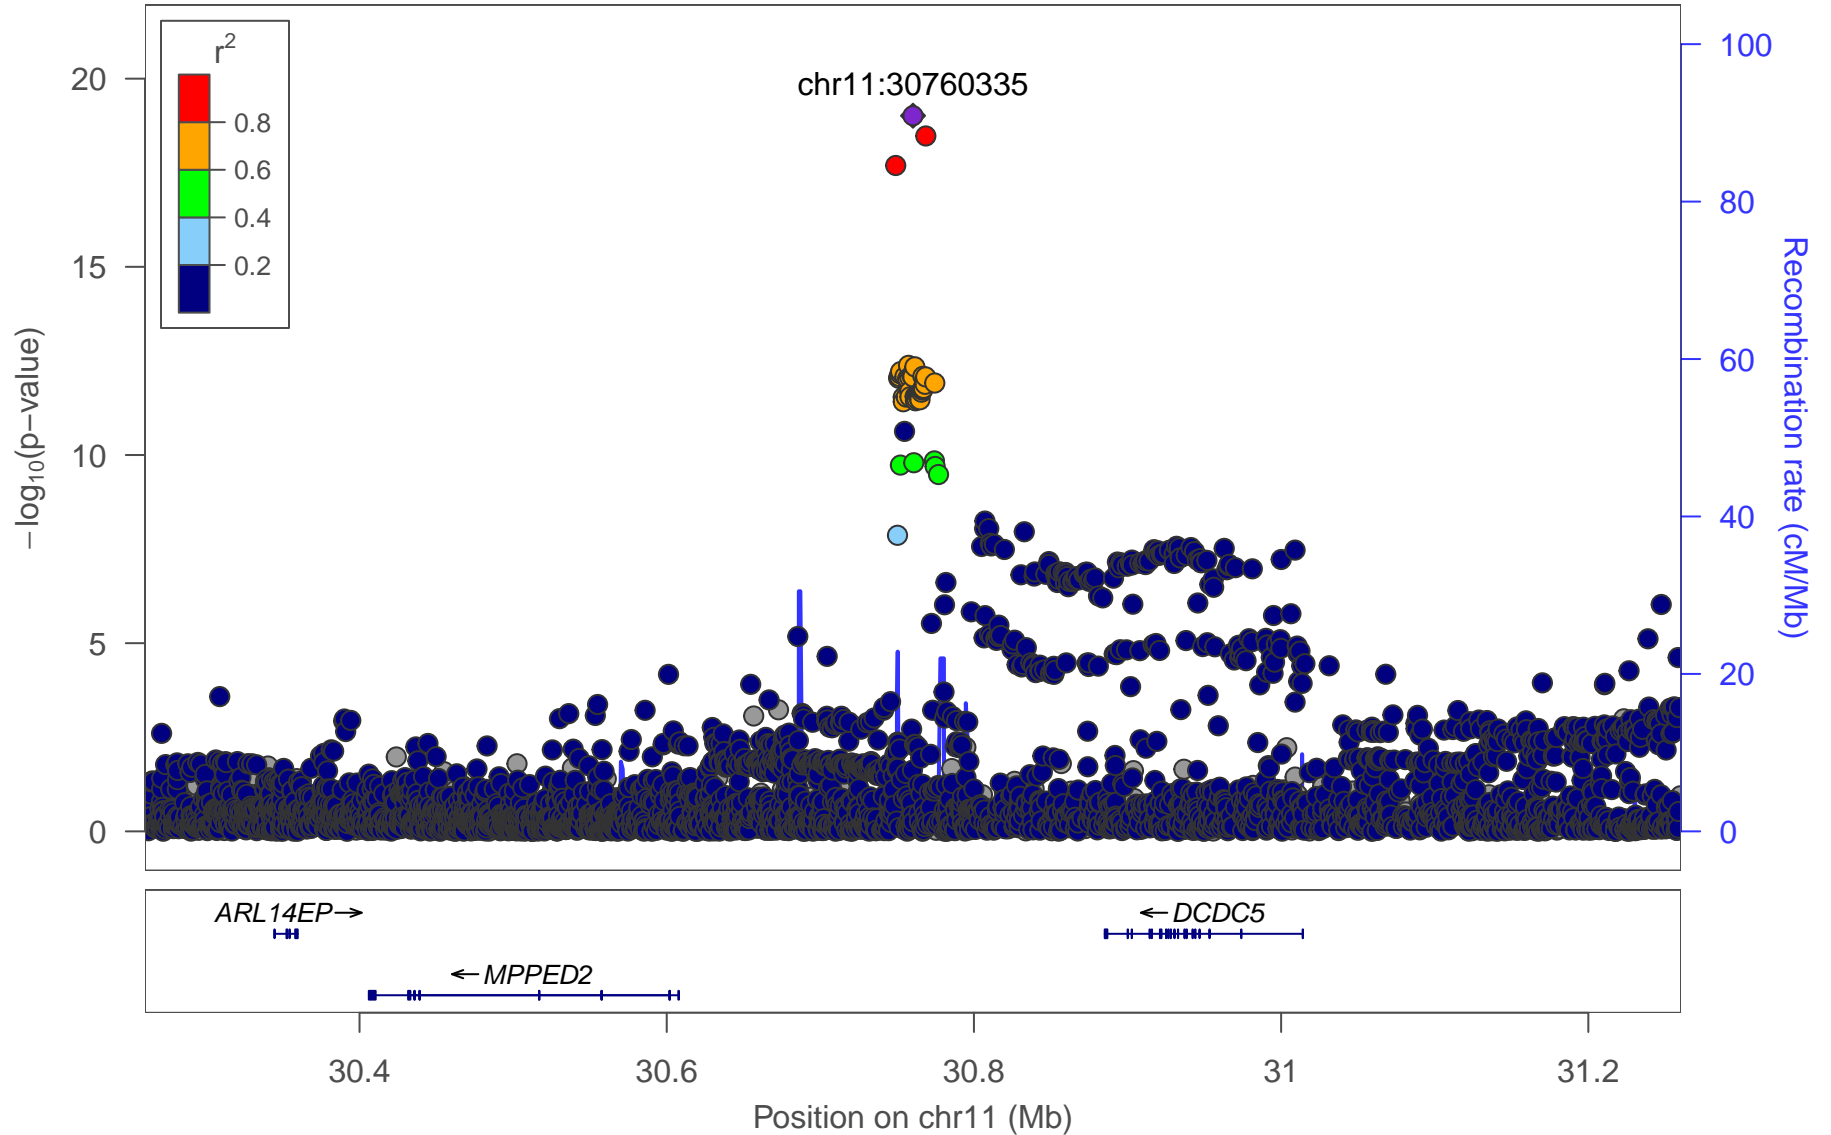

# 11\_7:Ala

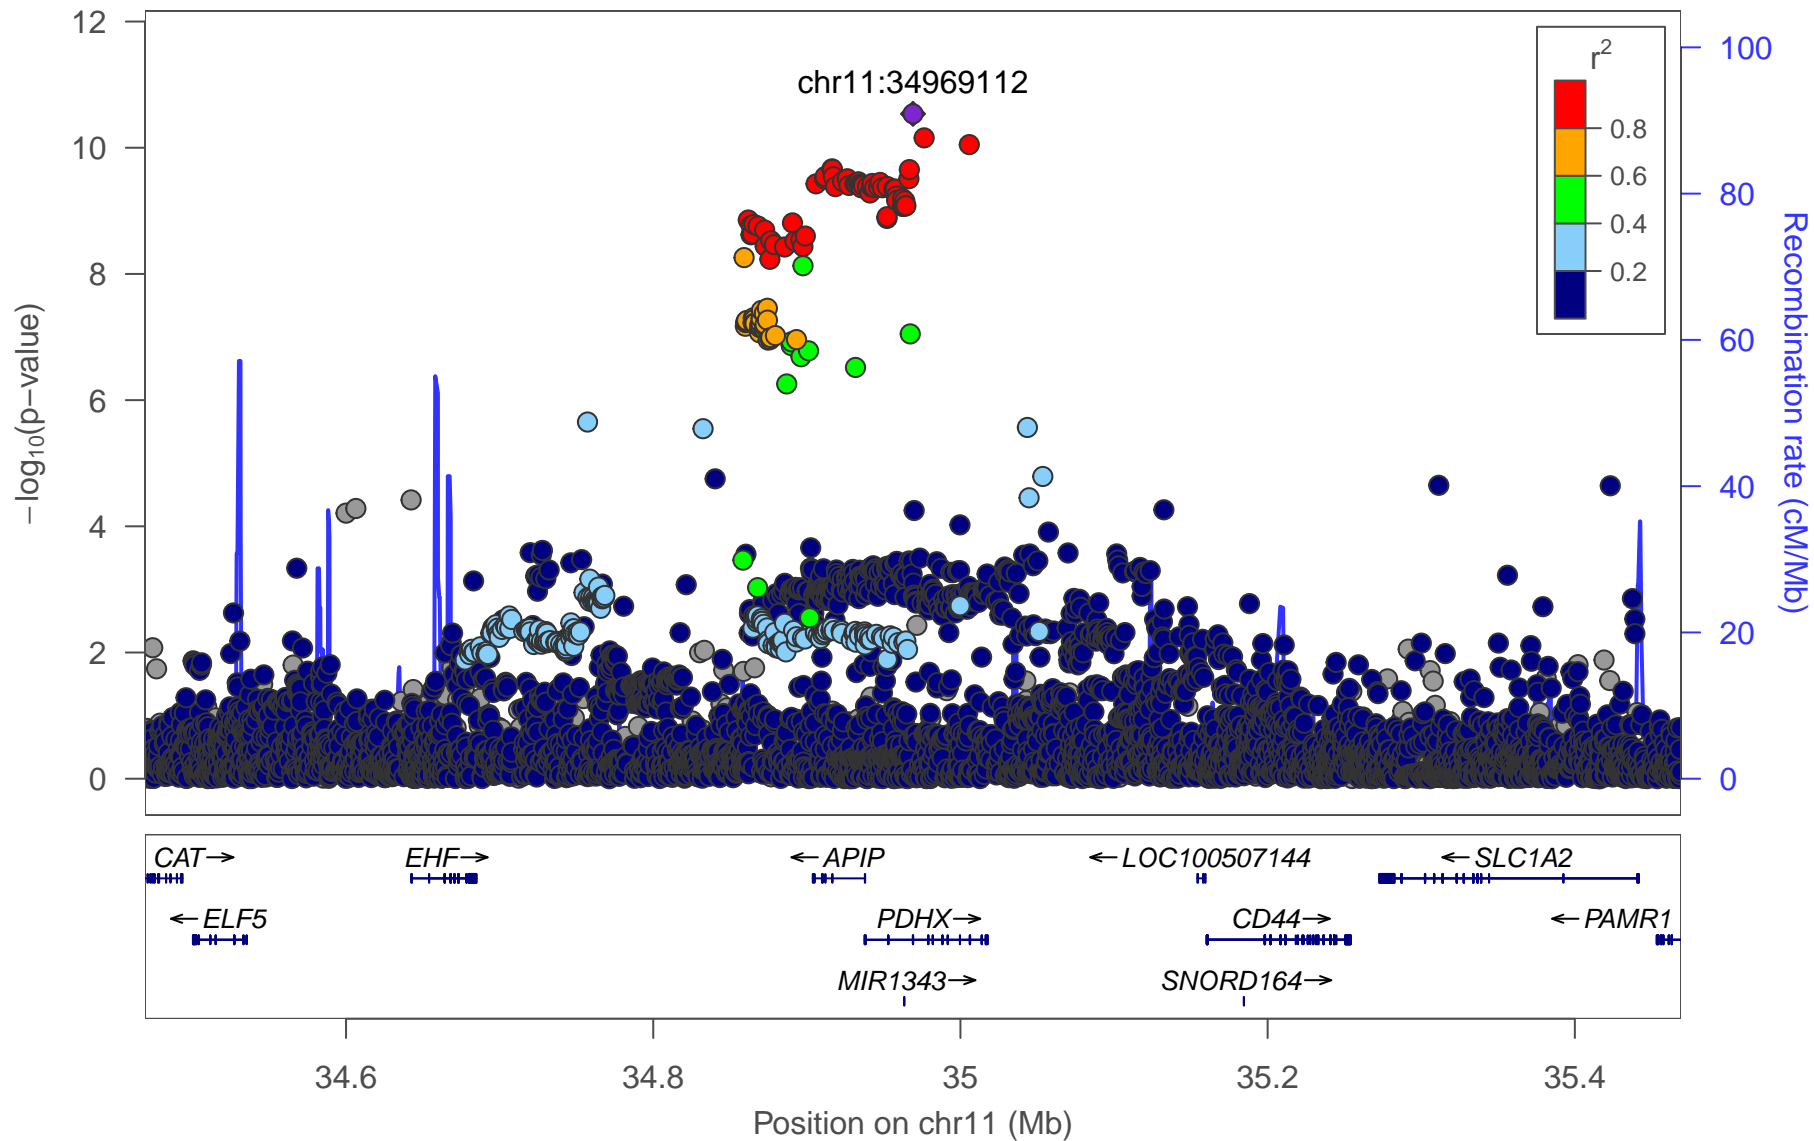



# 11\_8:HDL-D

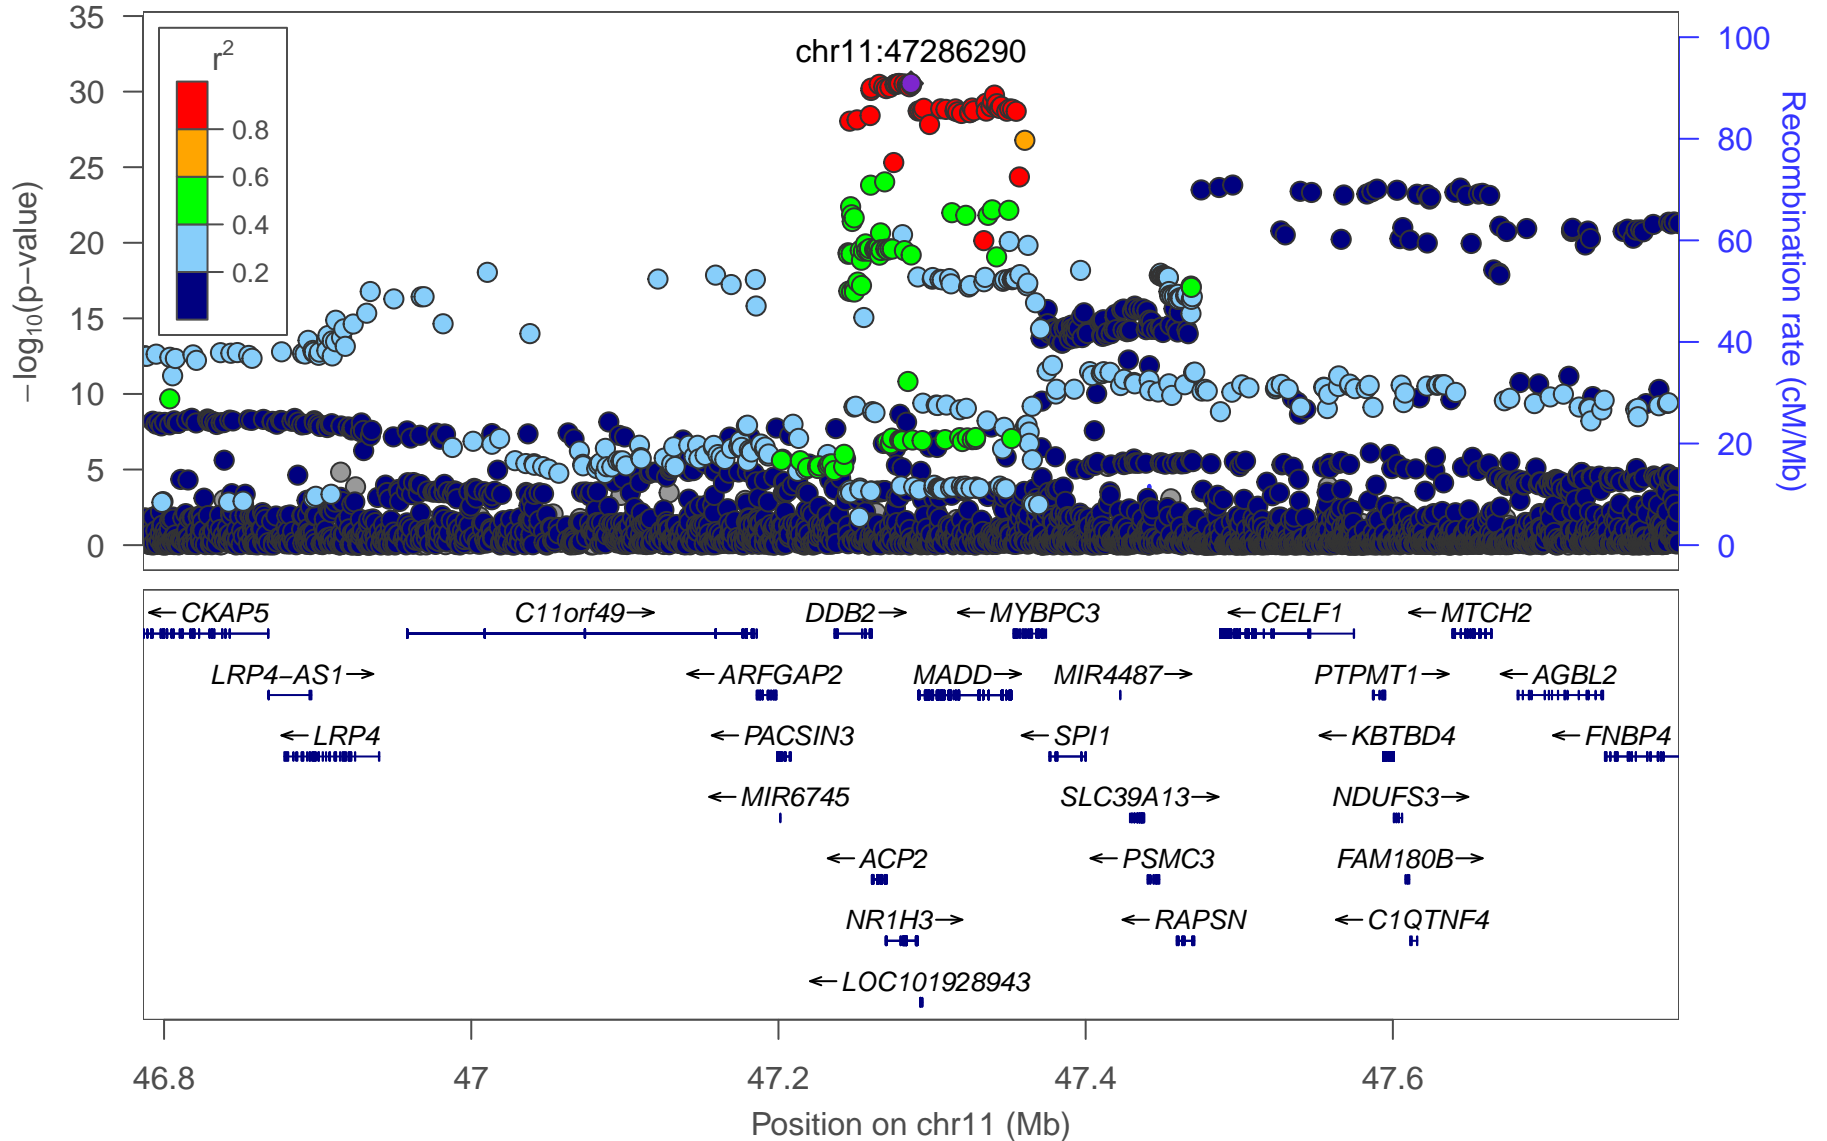

# 11\_9:M-HDL-C\_percent

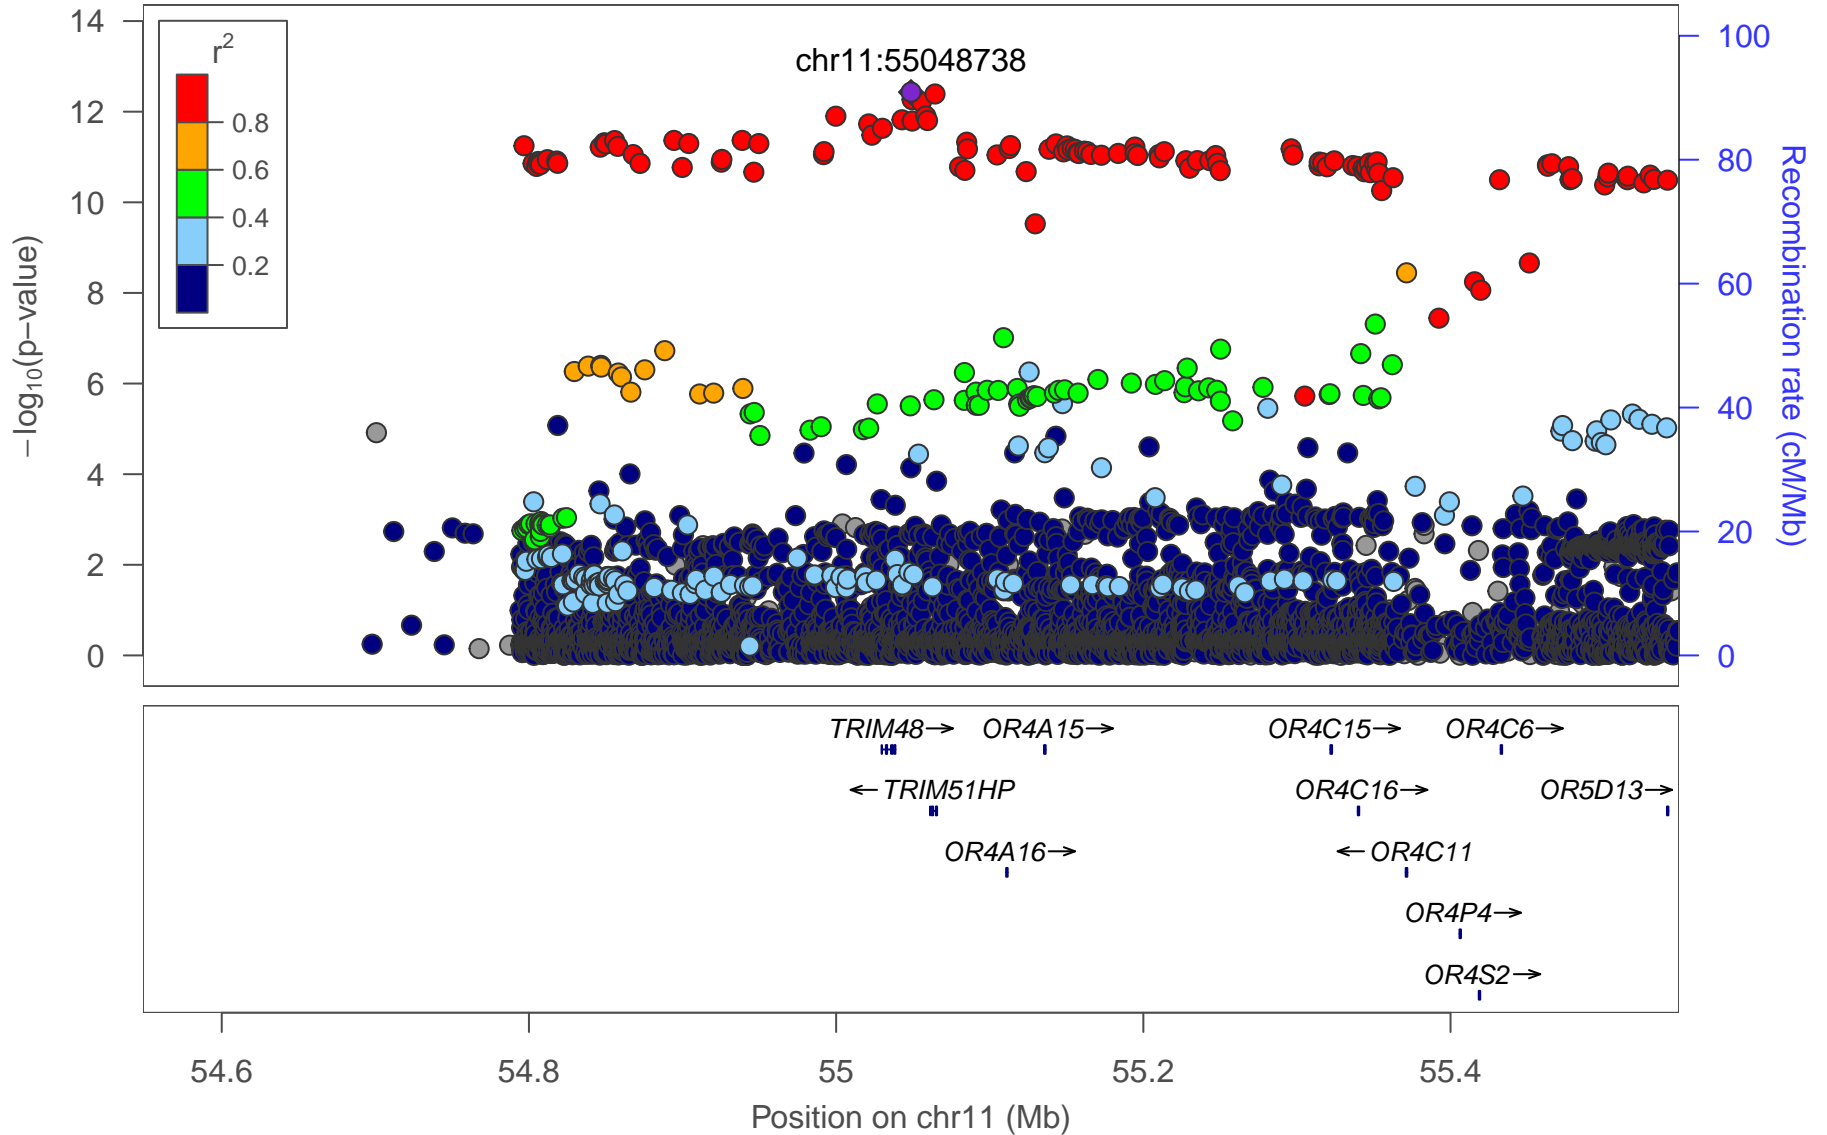

# 11\_10:UnsatDeg

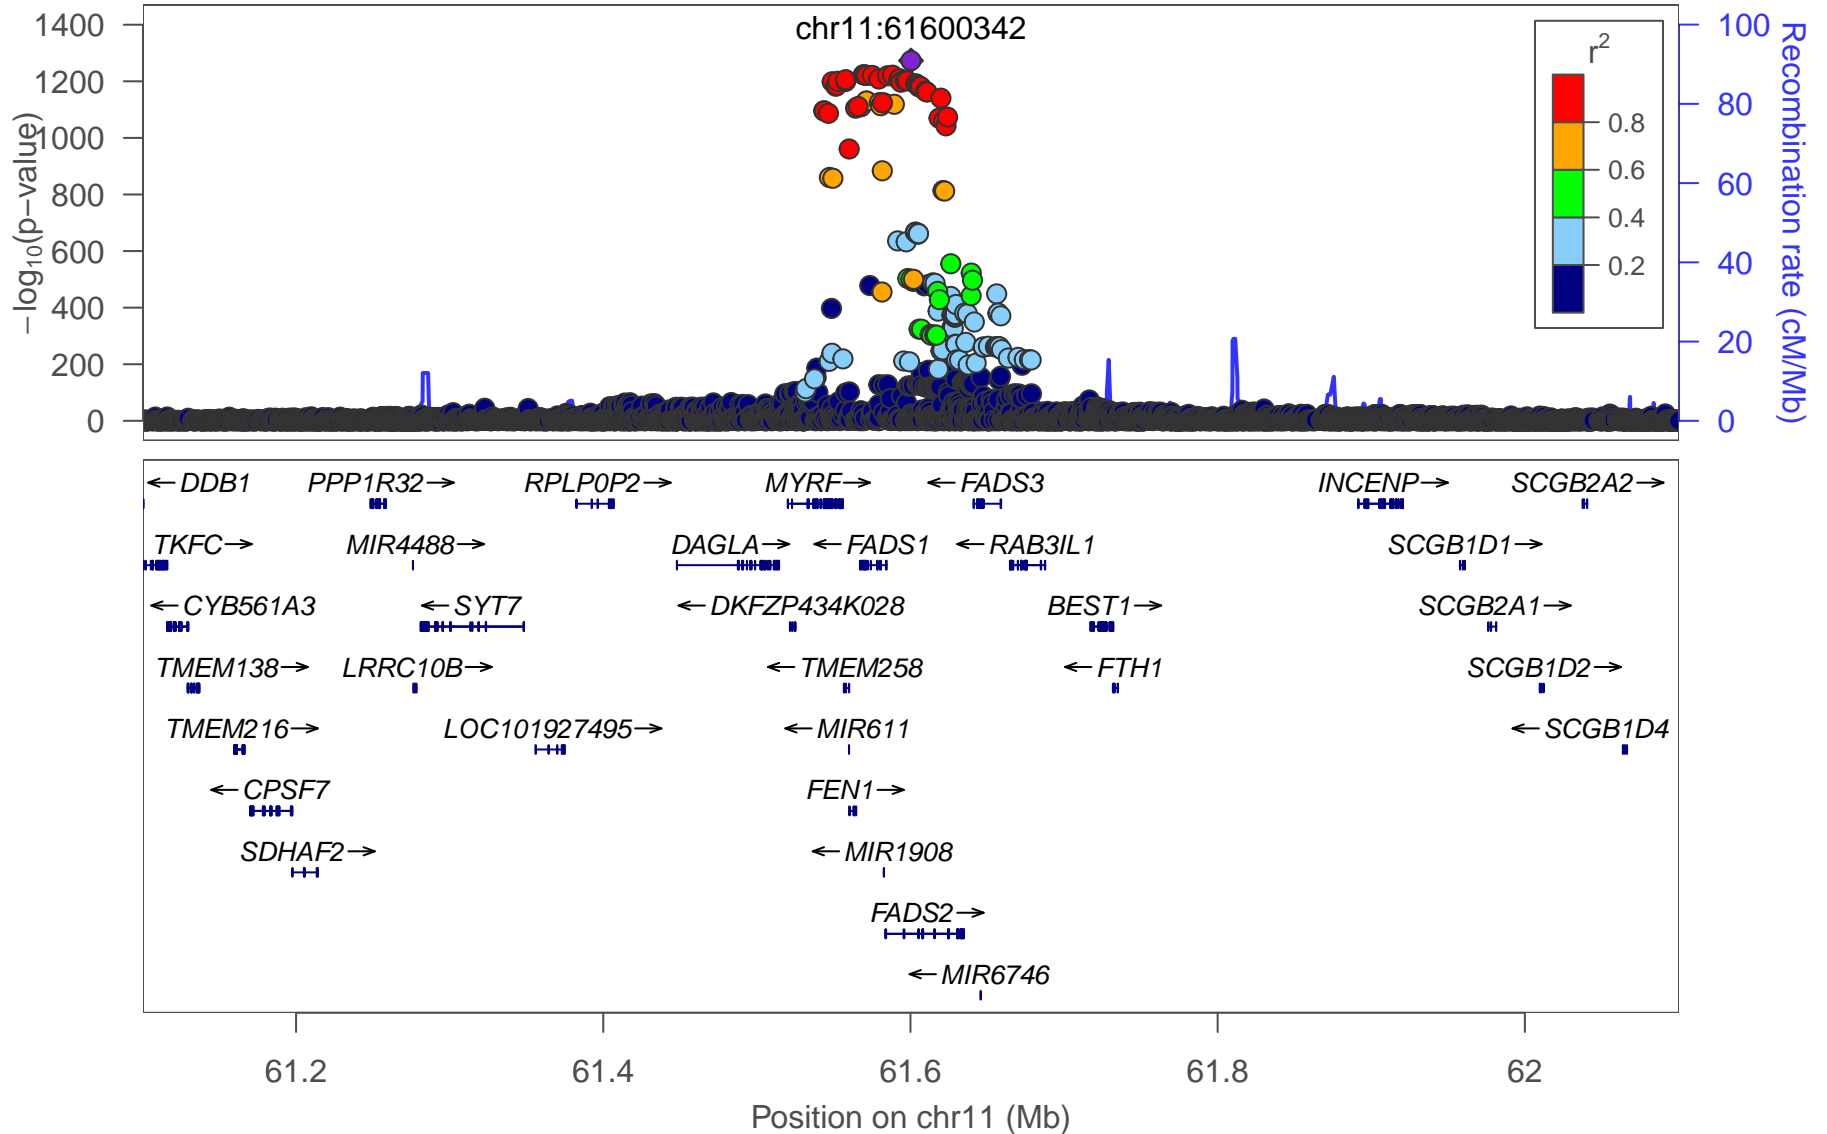

# 11\_11:FAw3byFA

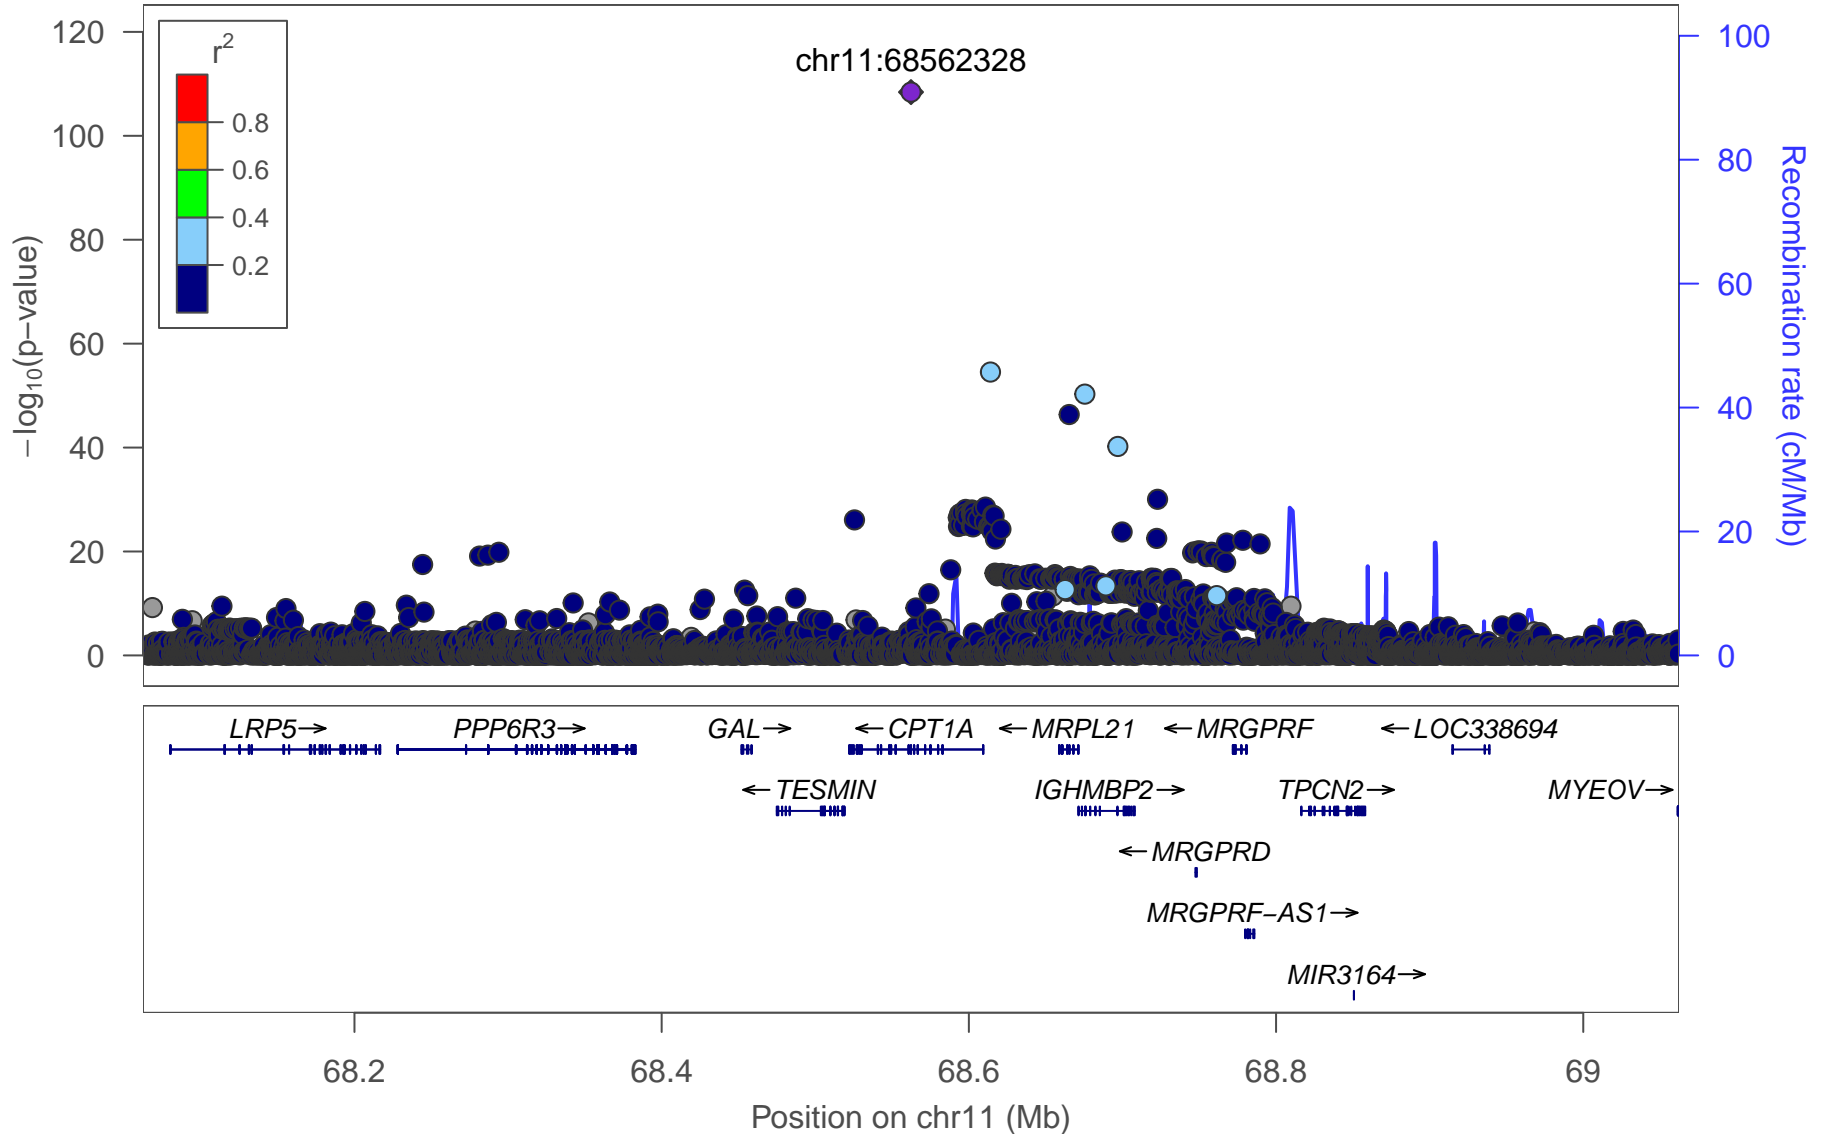

# 11\_12:Ala

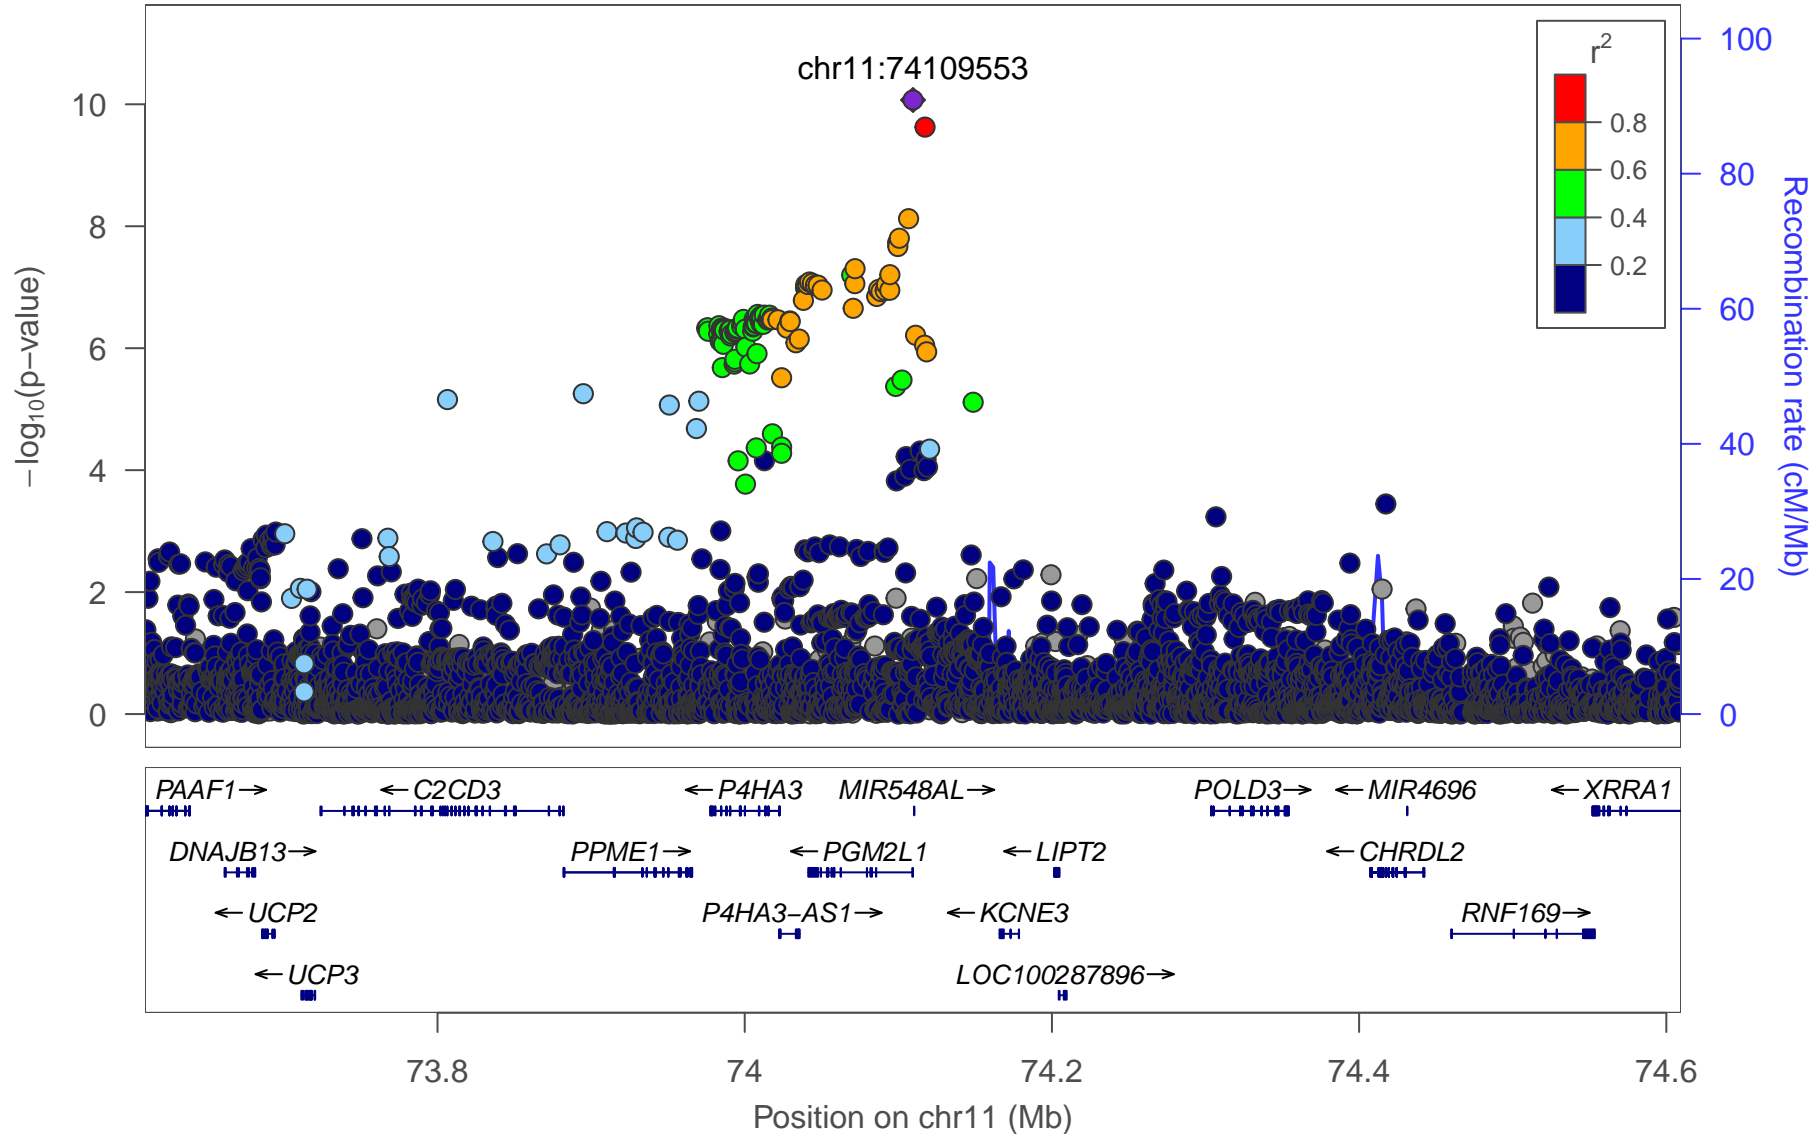

# 11\_13:M-HDL-PL

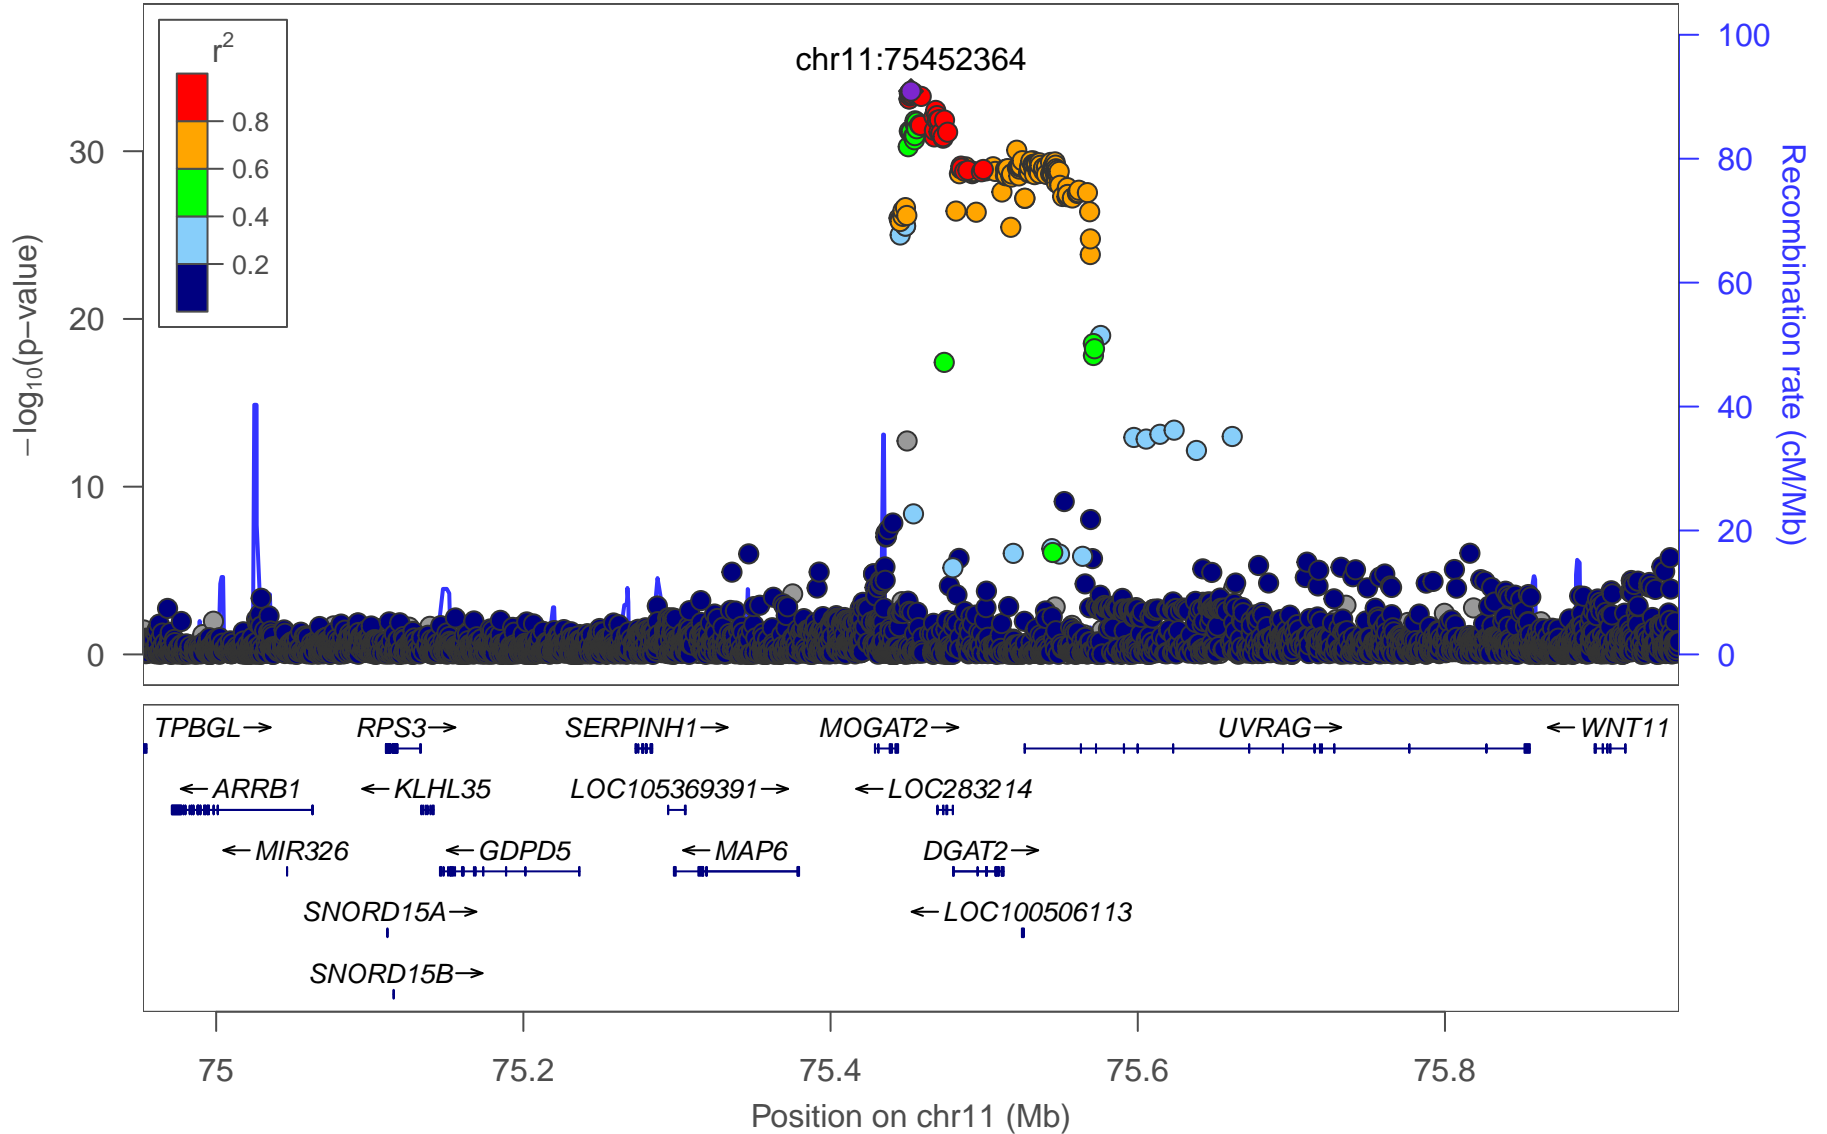

# 11\_14:Glc

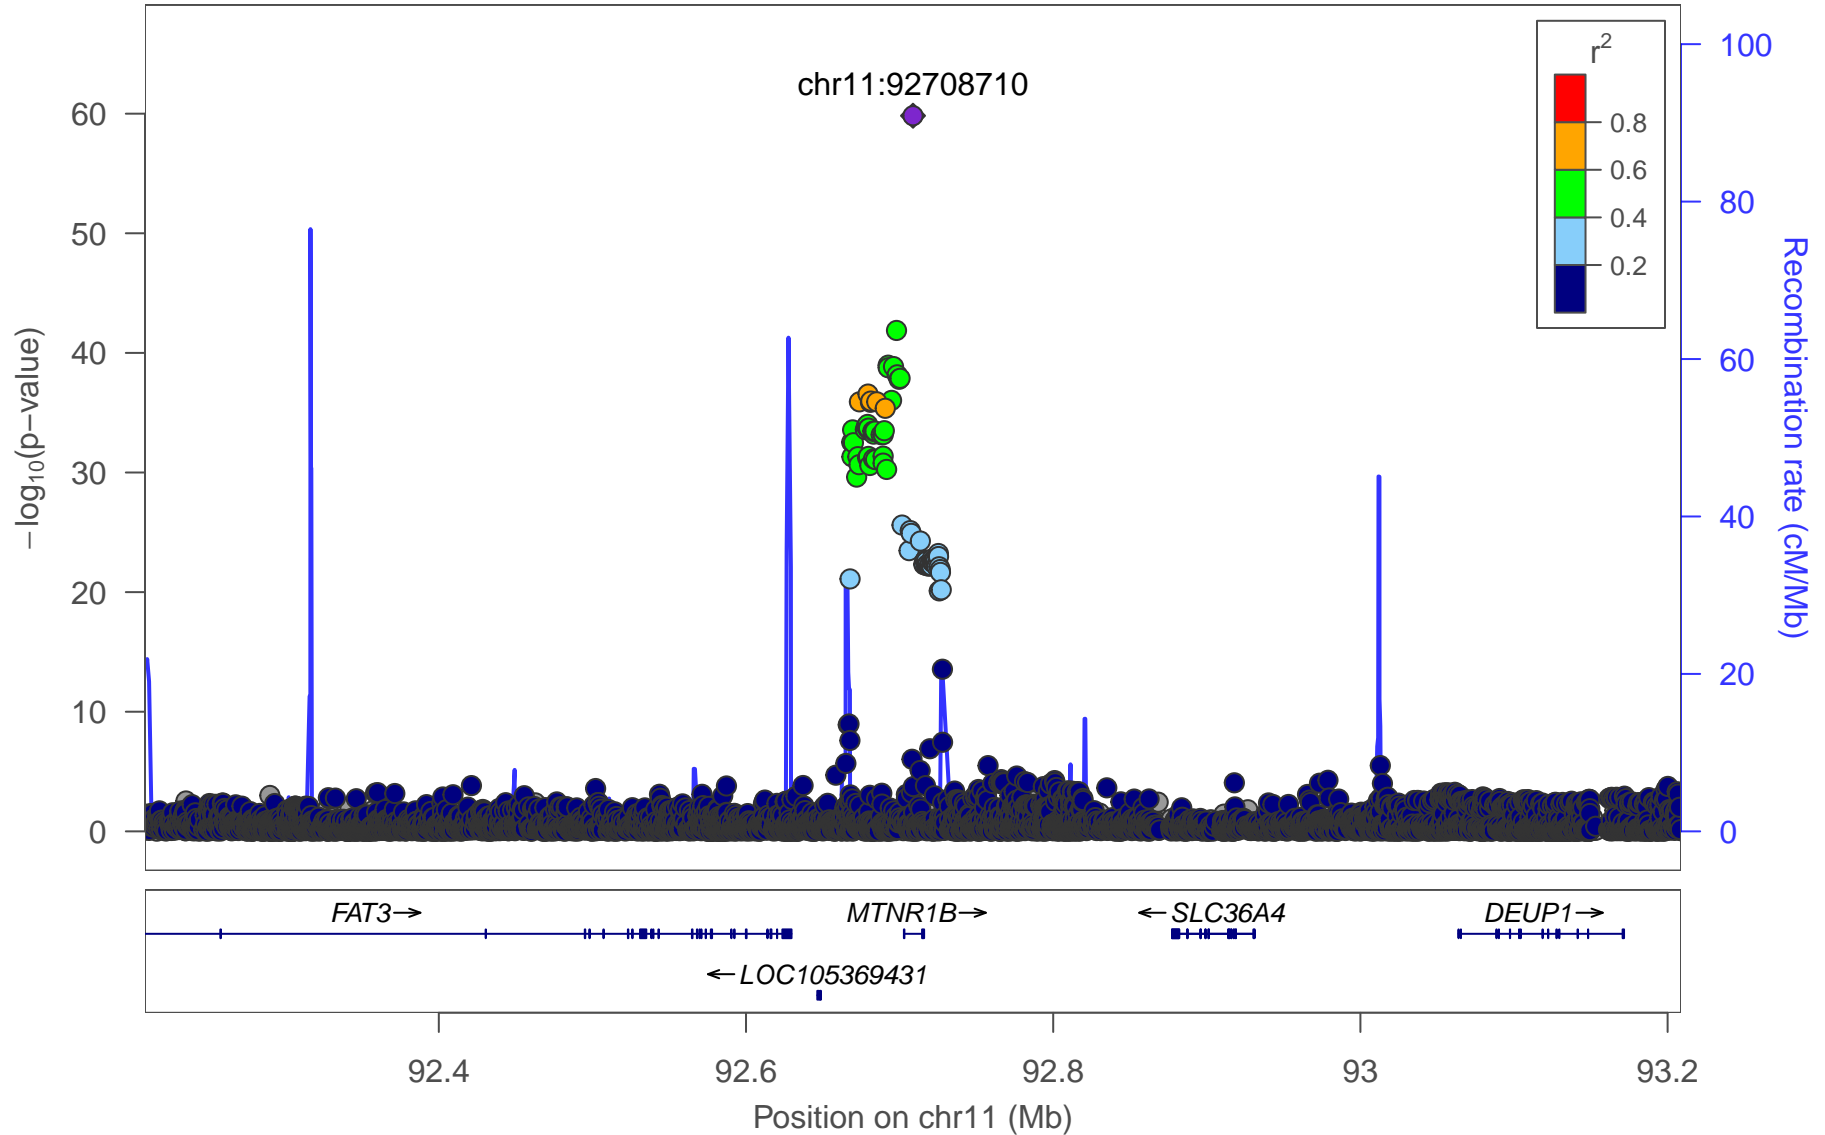

# 11\_15:S-VLDL-TG

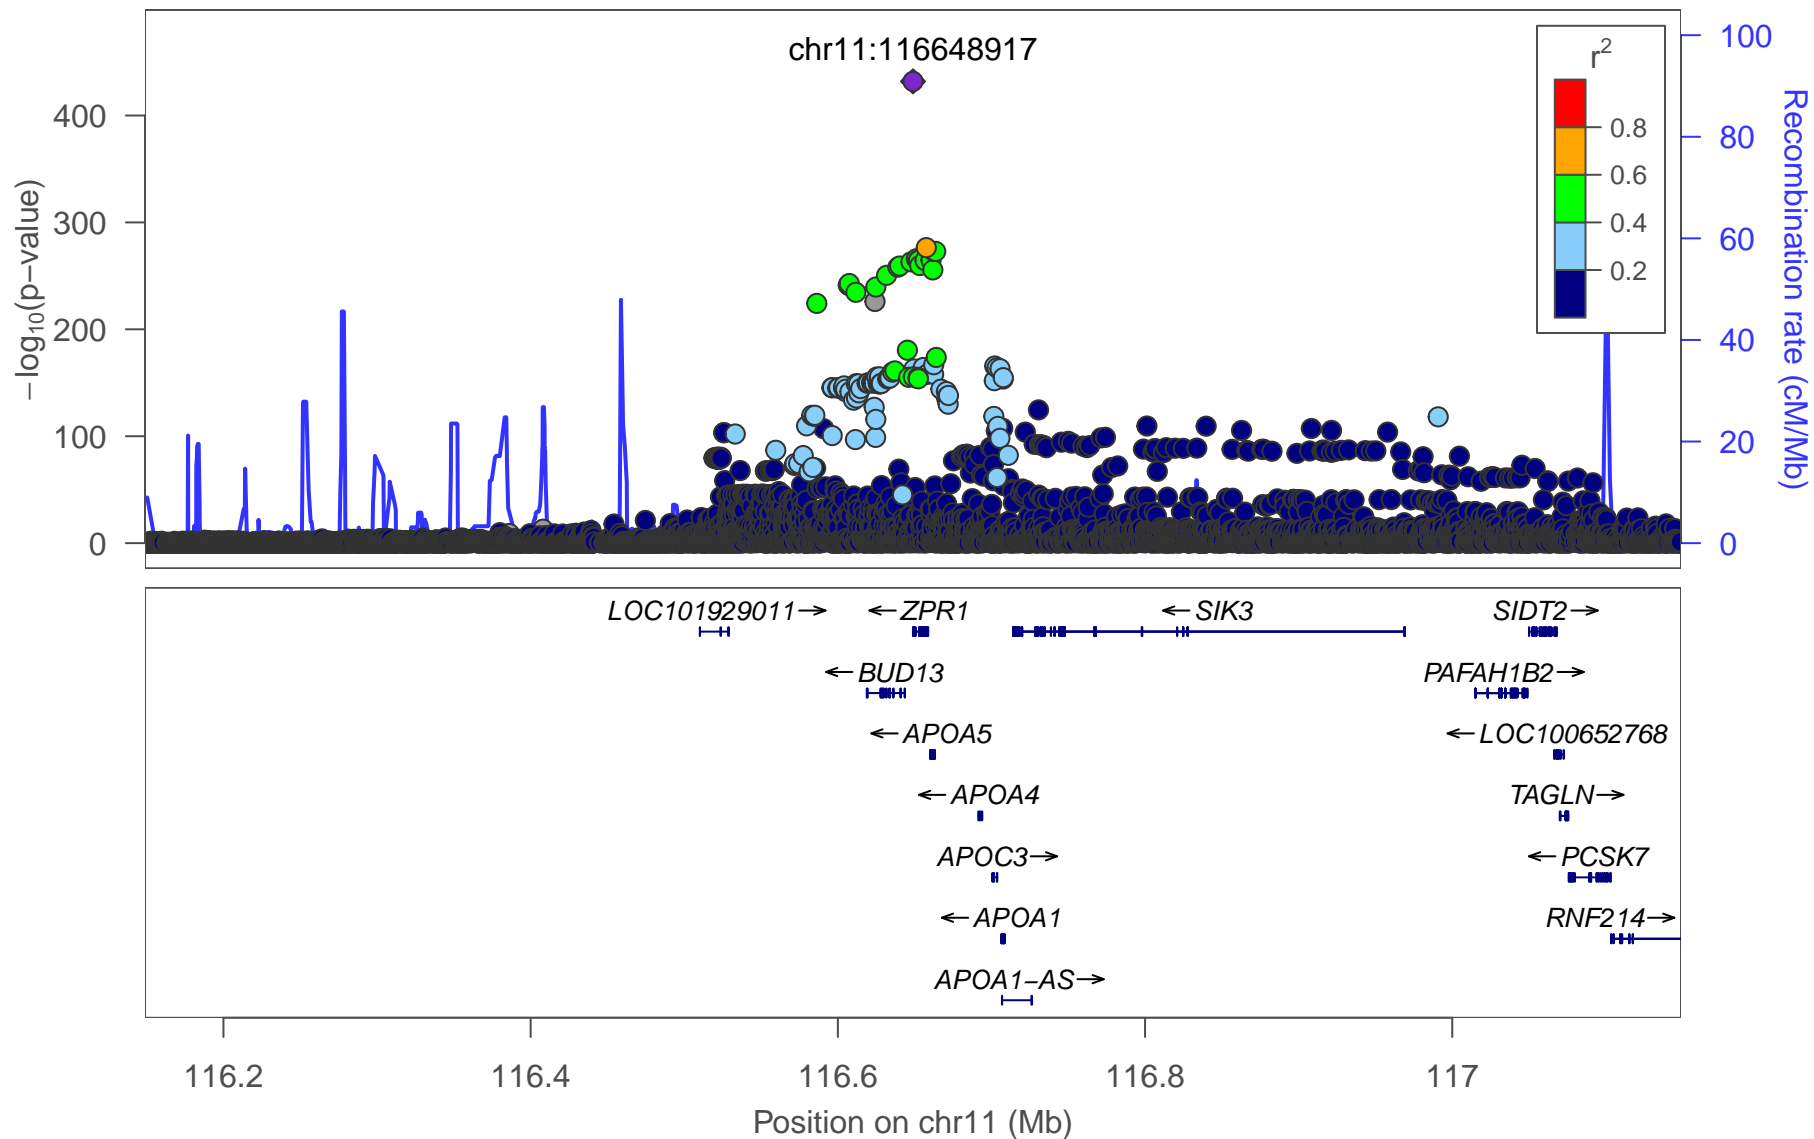



# 11\_16:TotCho

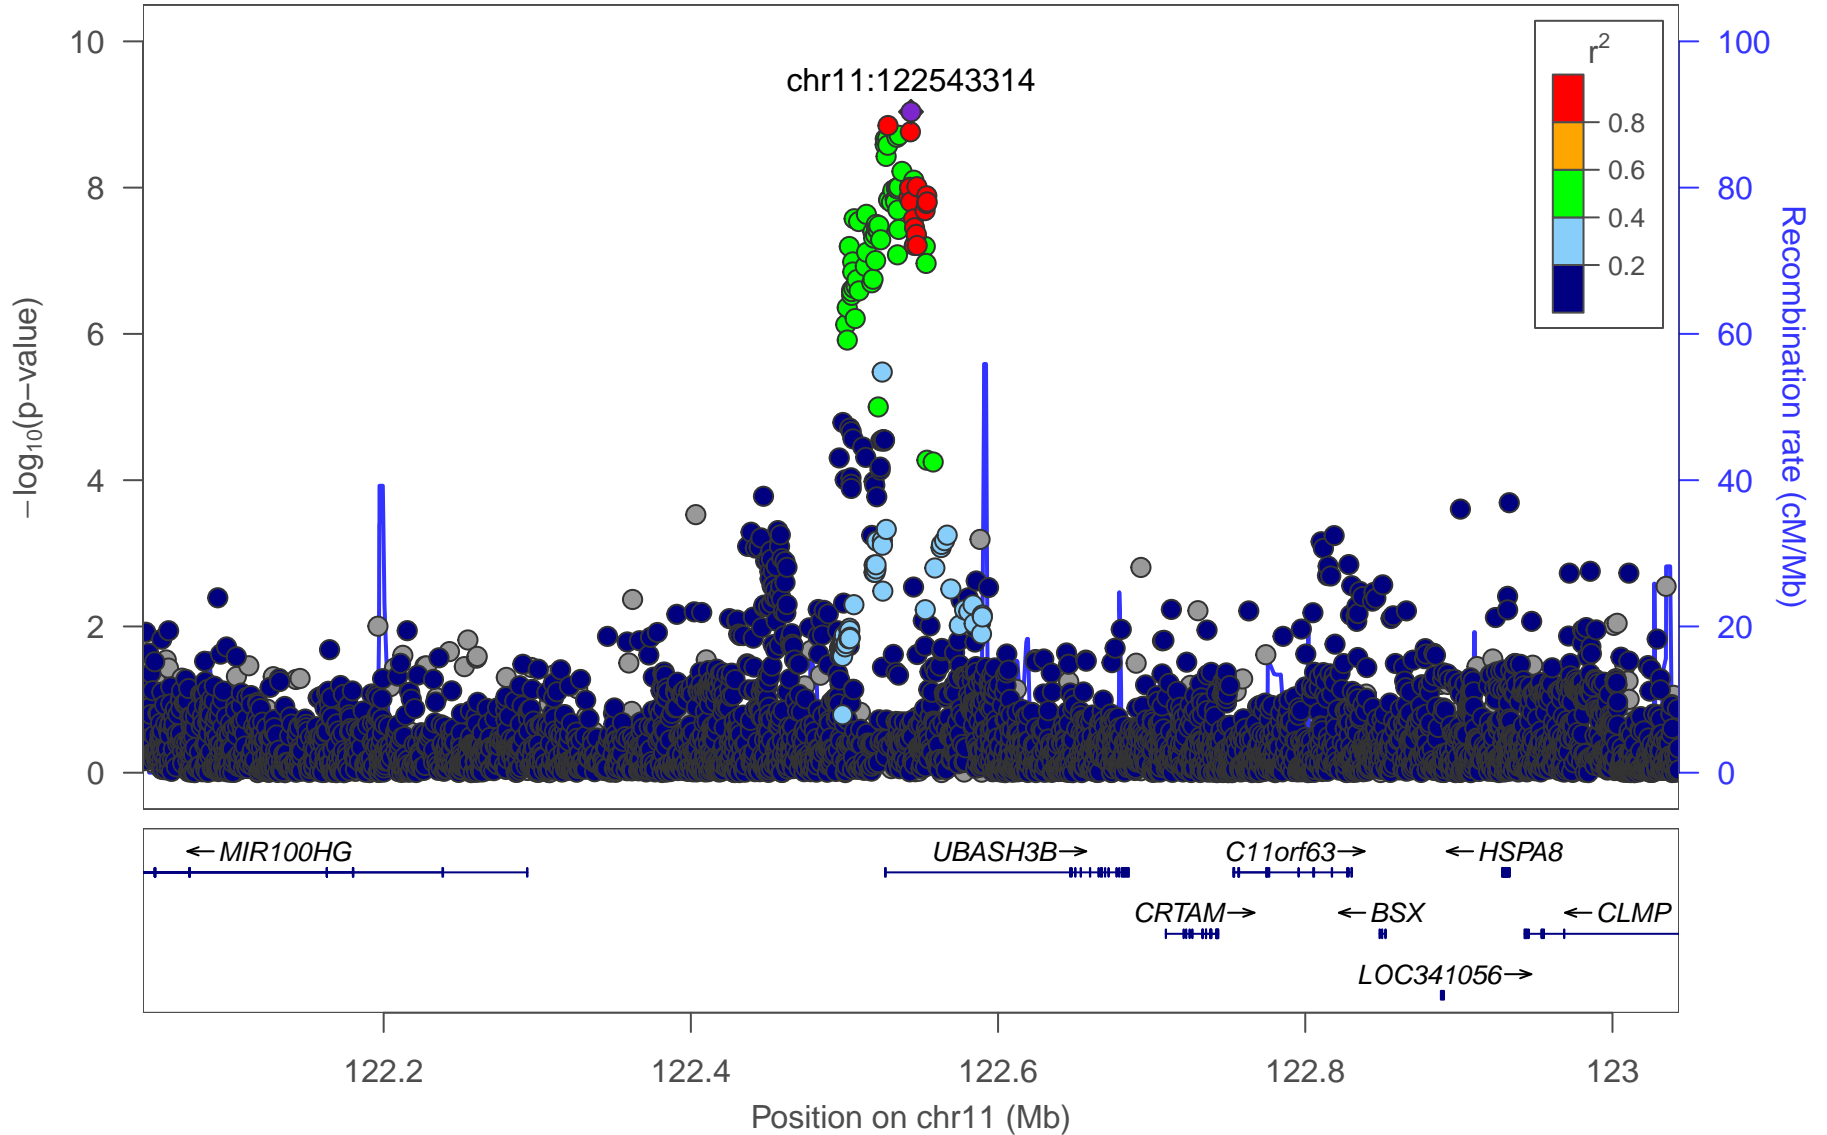

# 11\_17:L-HDL-PL\_percent

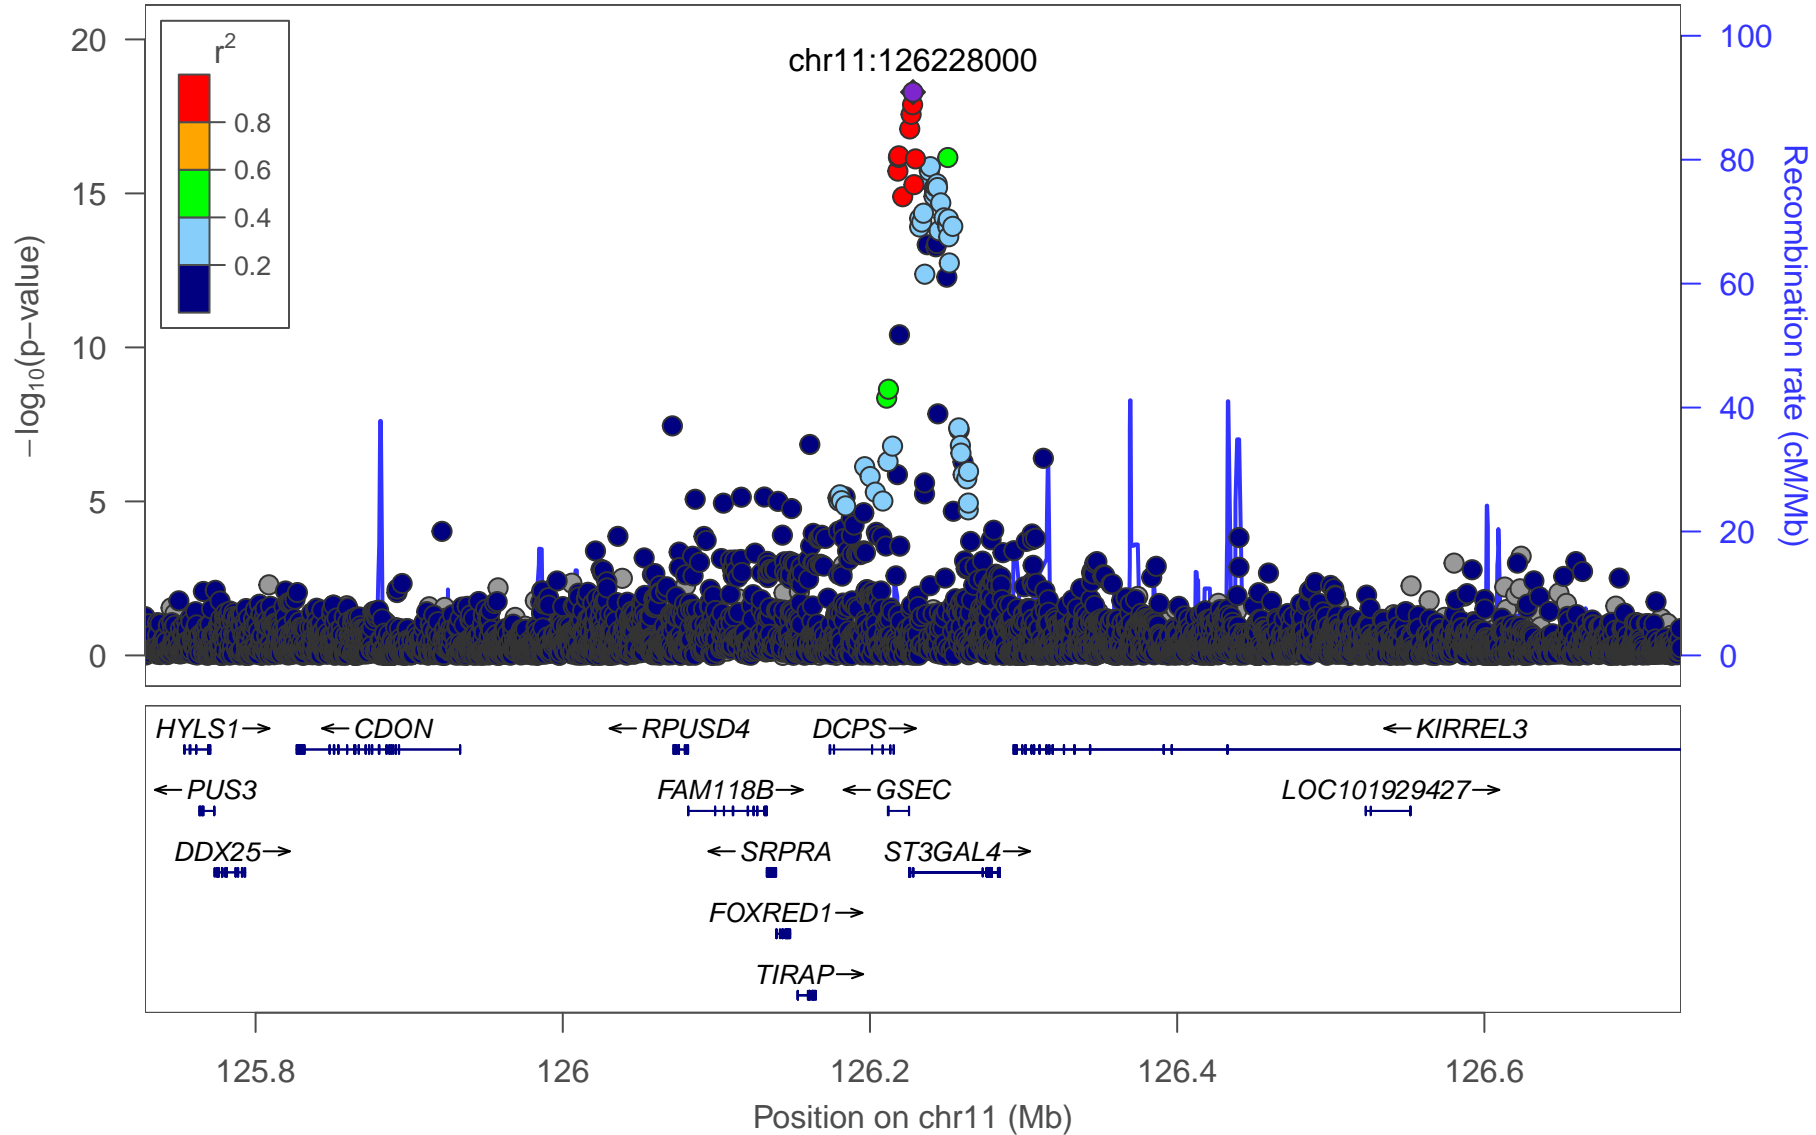

# 11\_18:XS-VLDL-C

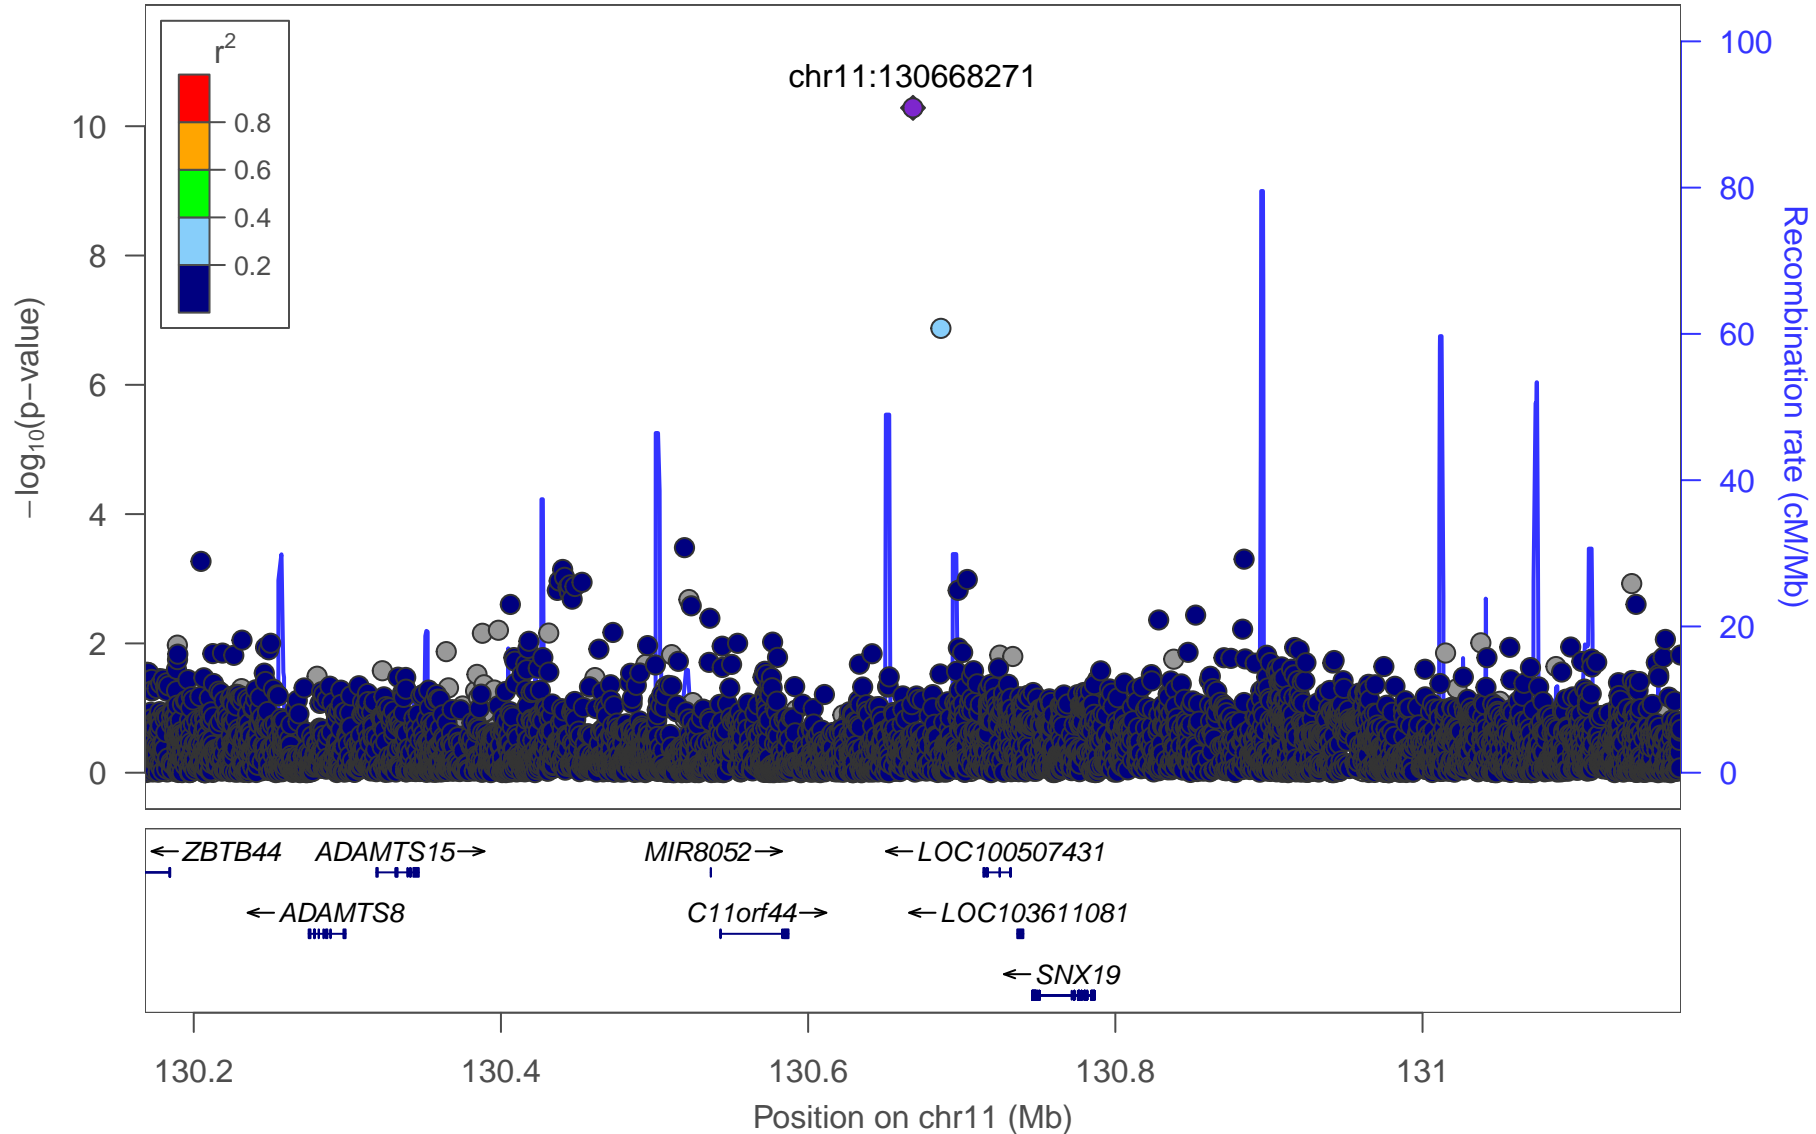

# 12\_1:Crea

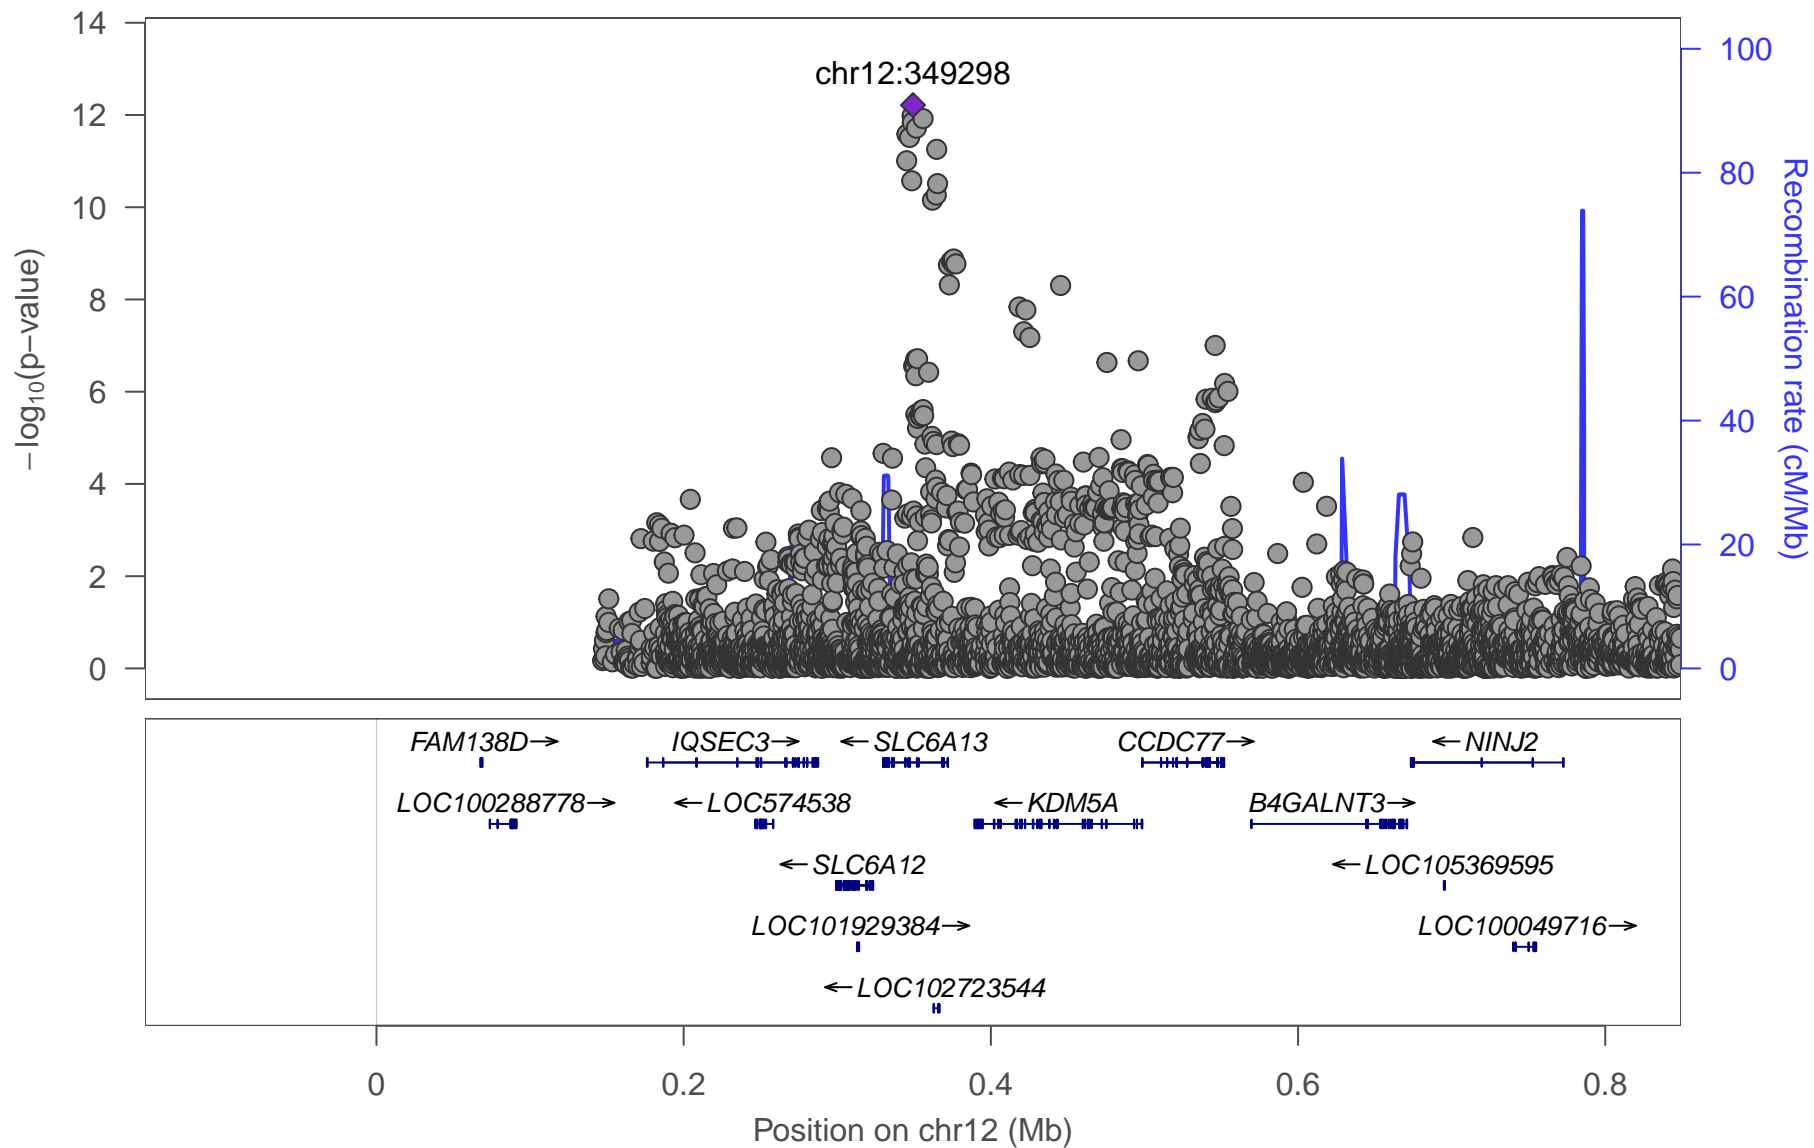

# 12\_2:Glc

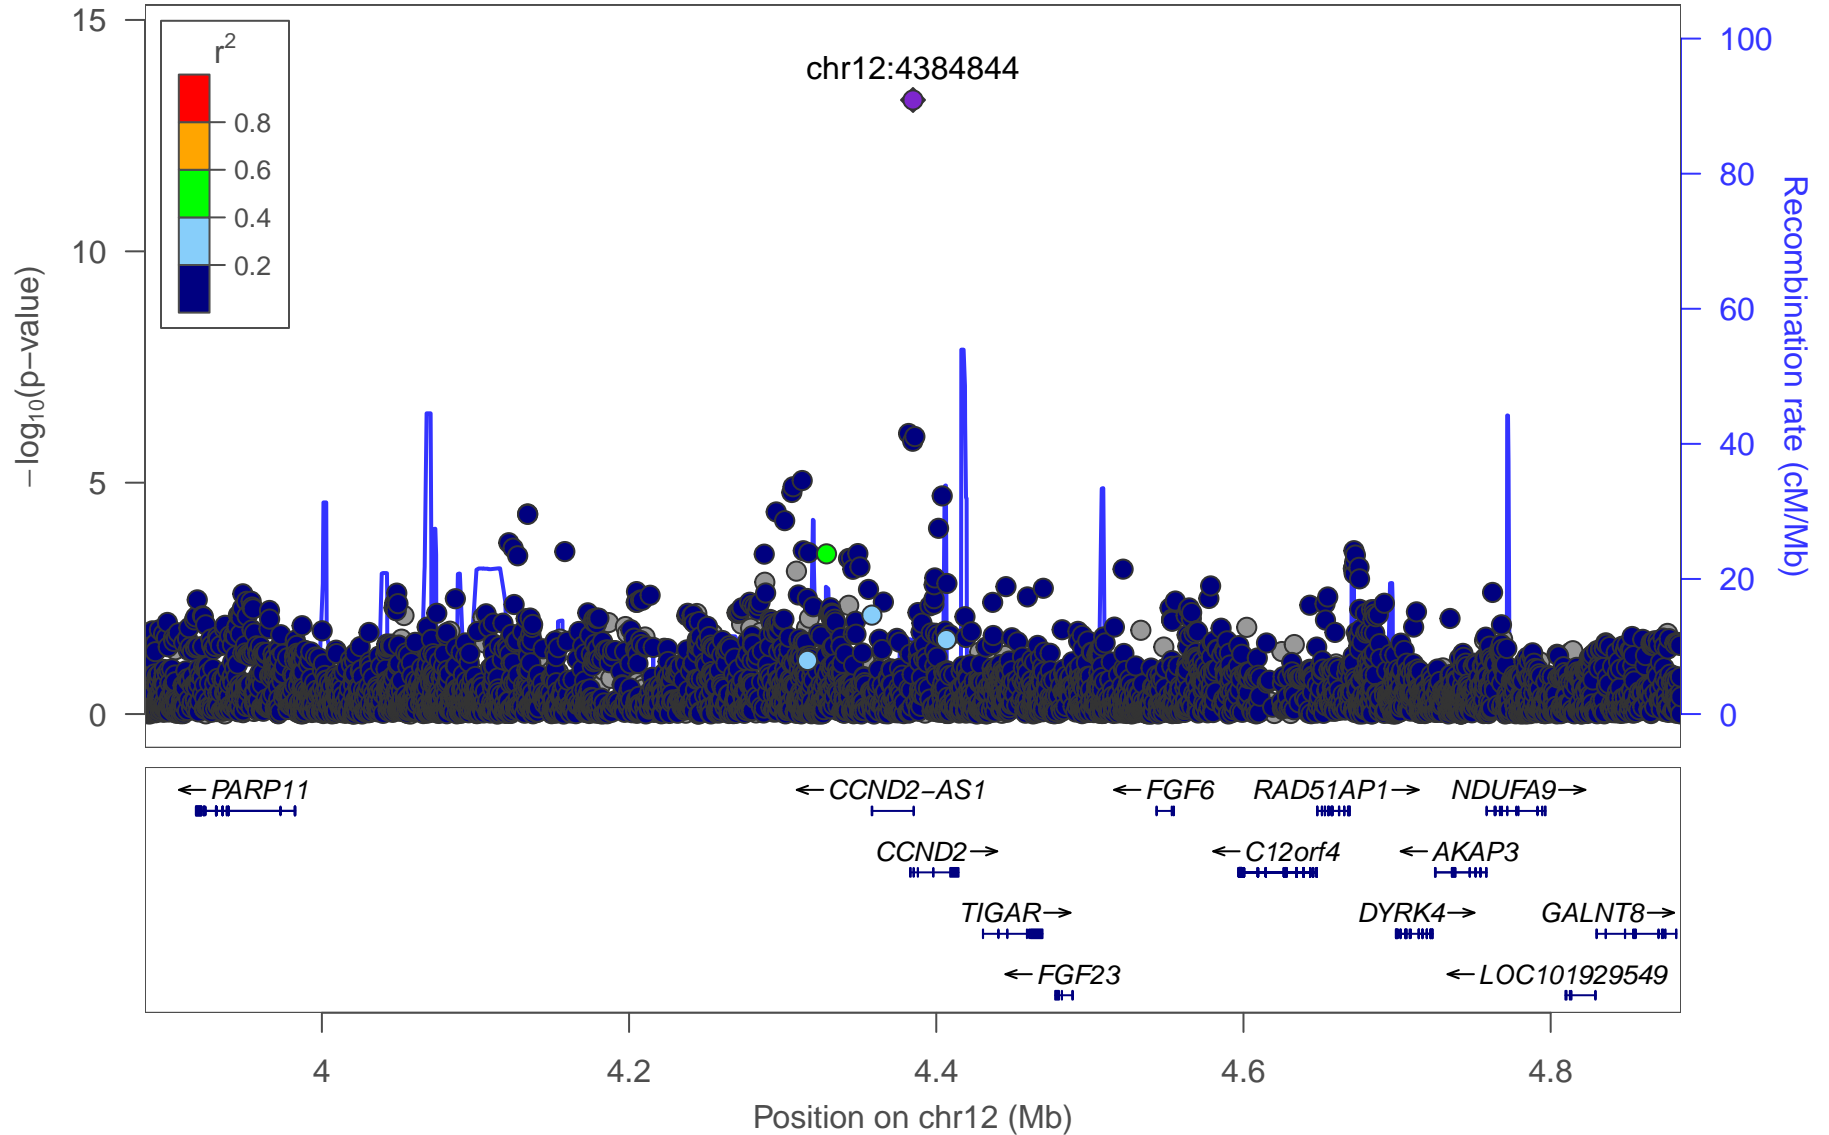

# 12\_3:PUFA

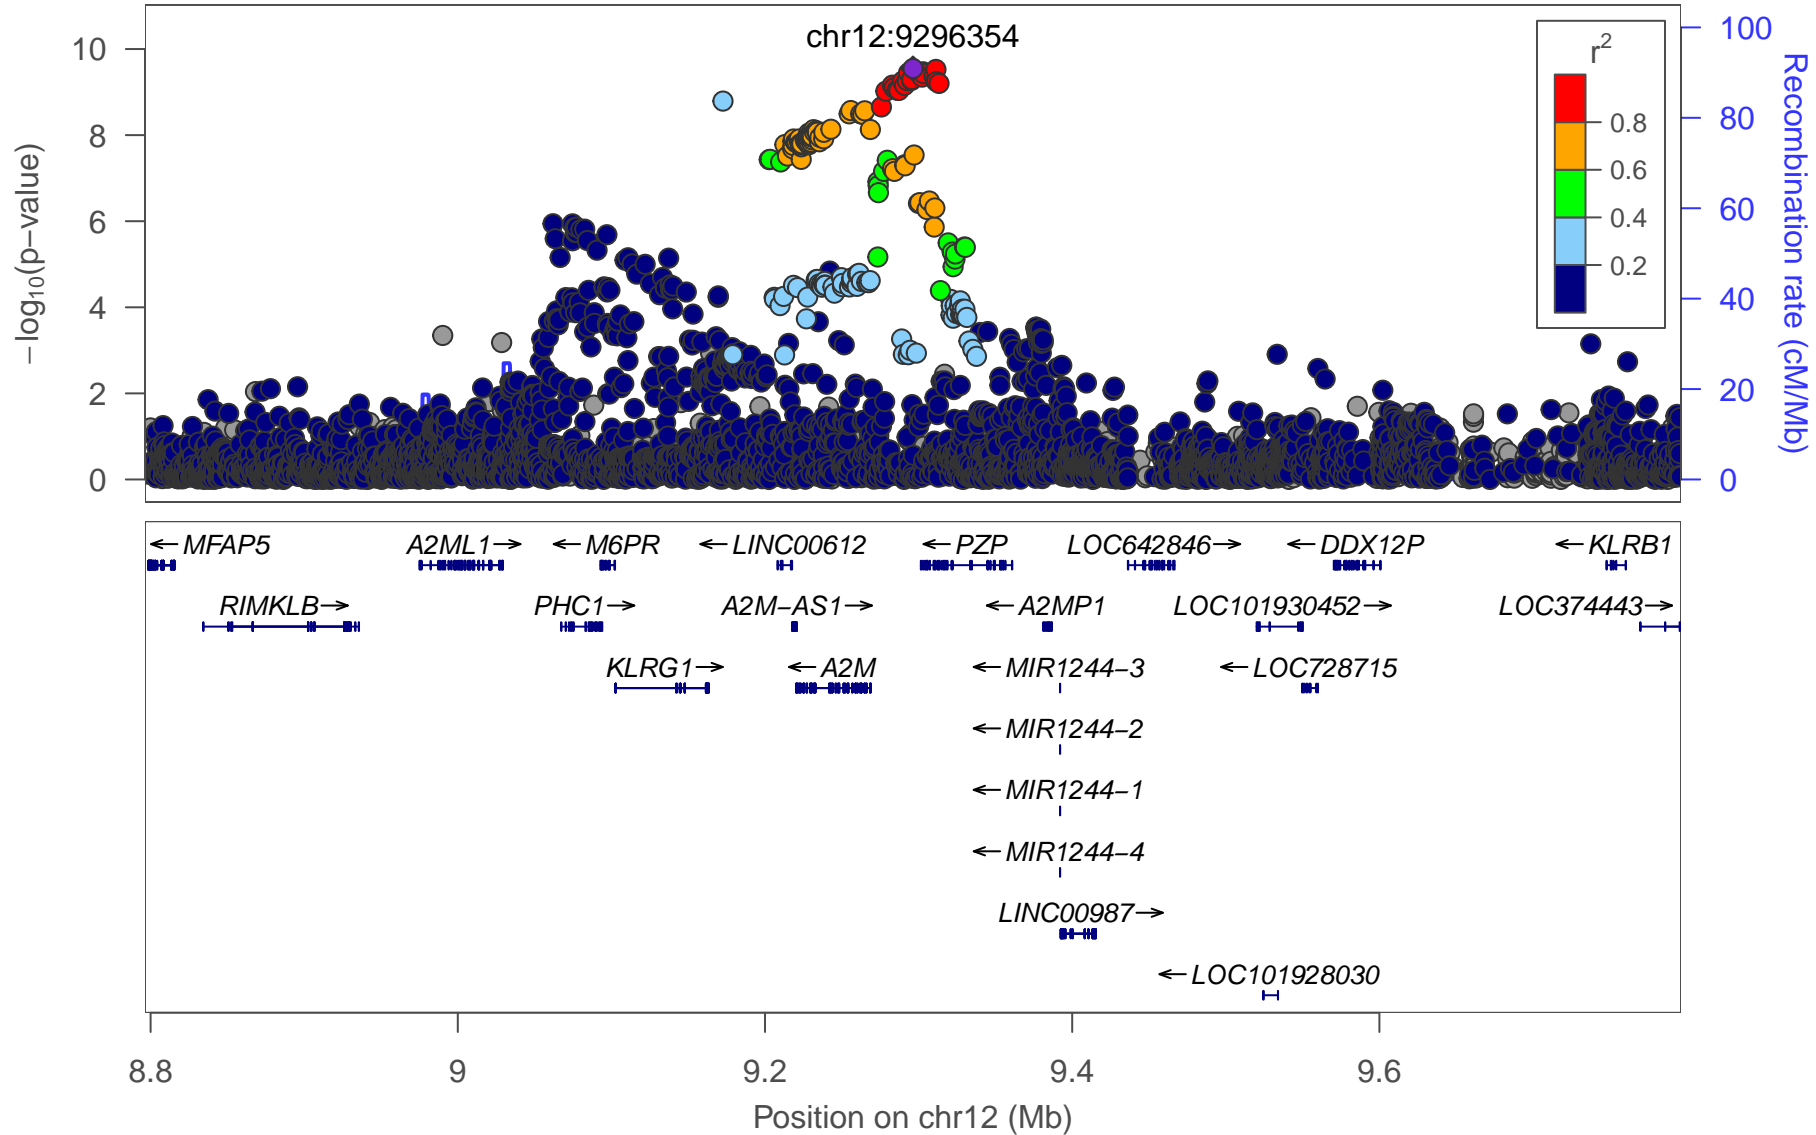

# 12\_4:XS-VLDL-C\_percent

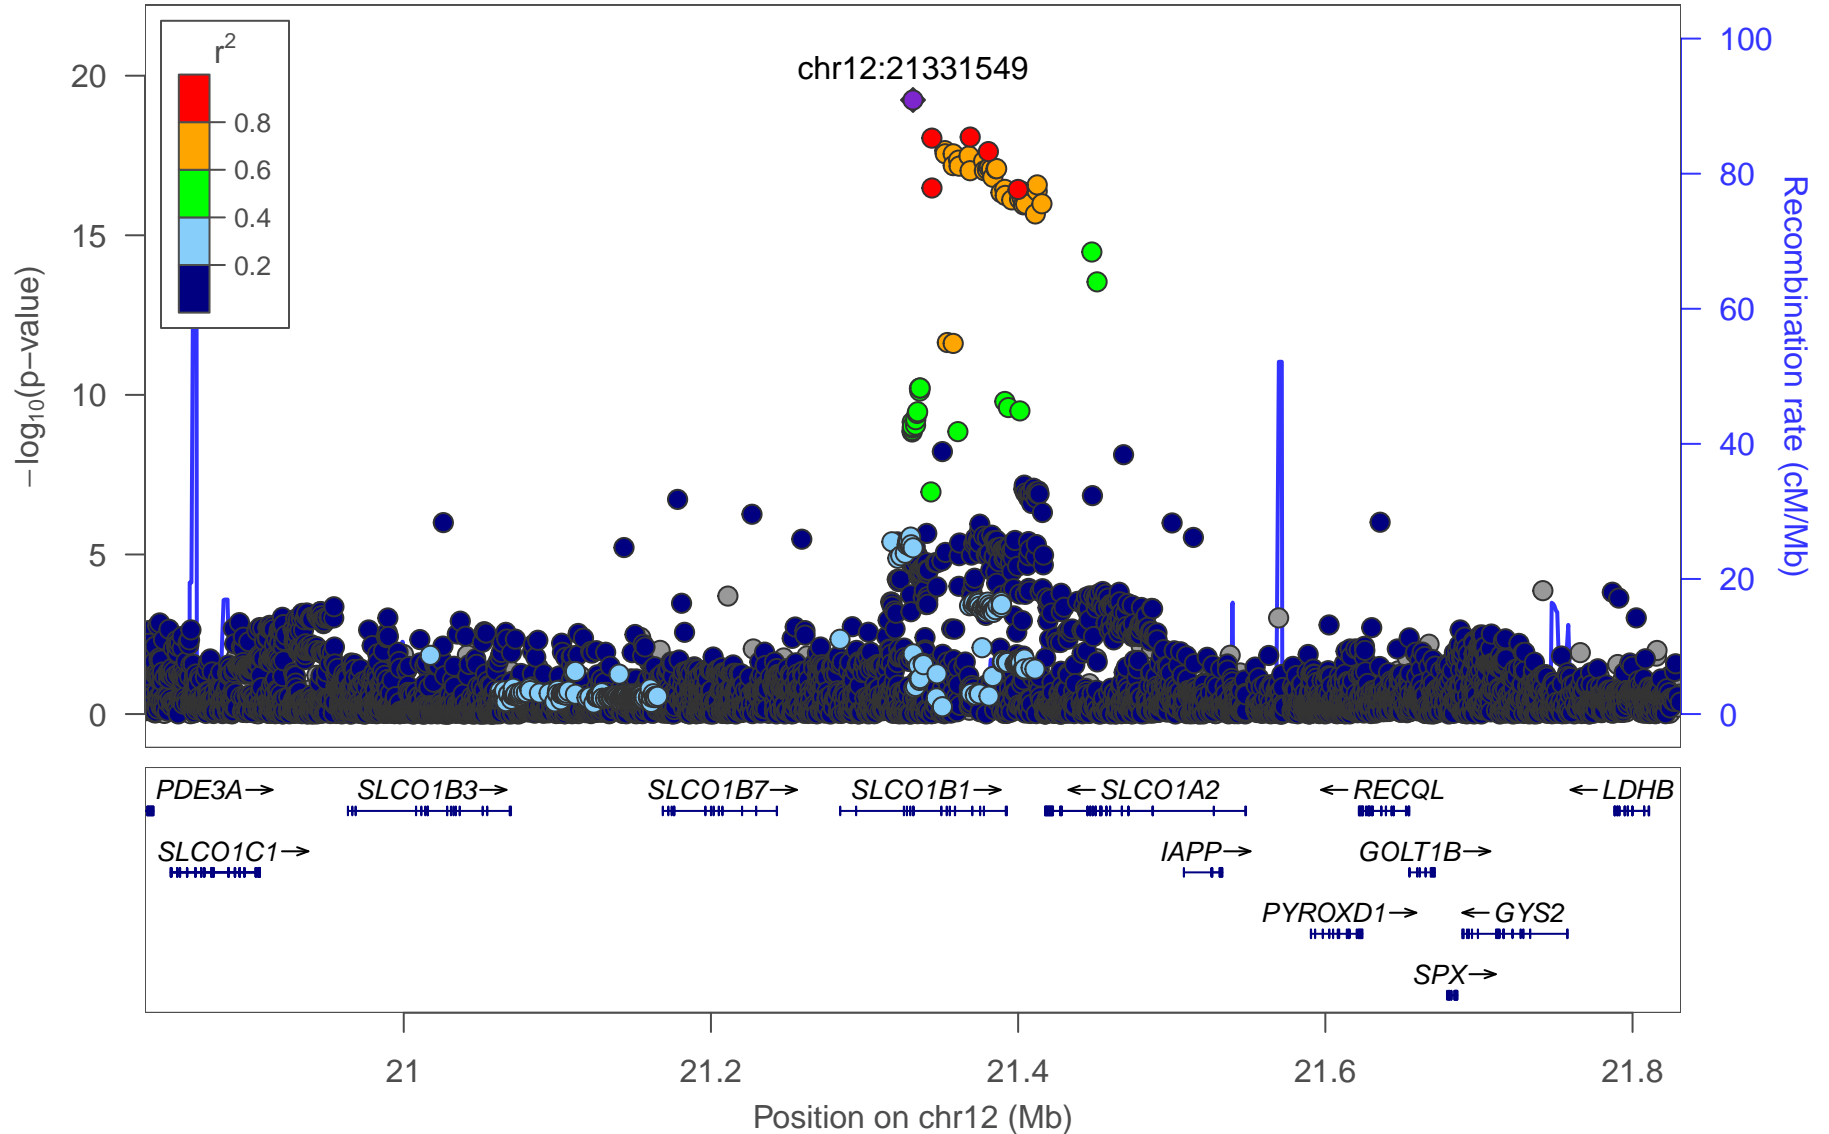

# 12\_5:Gln

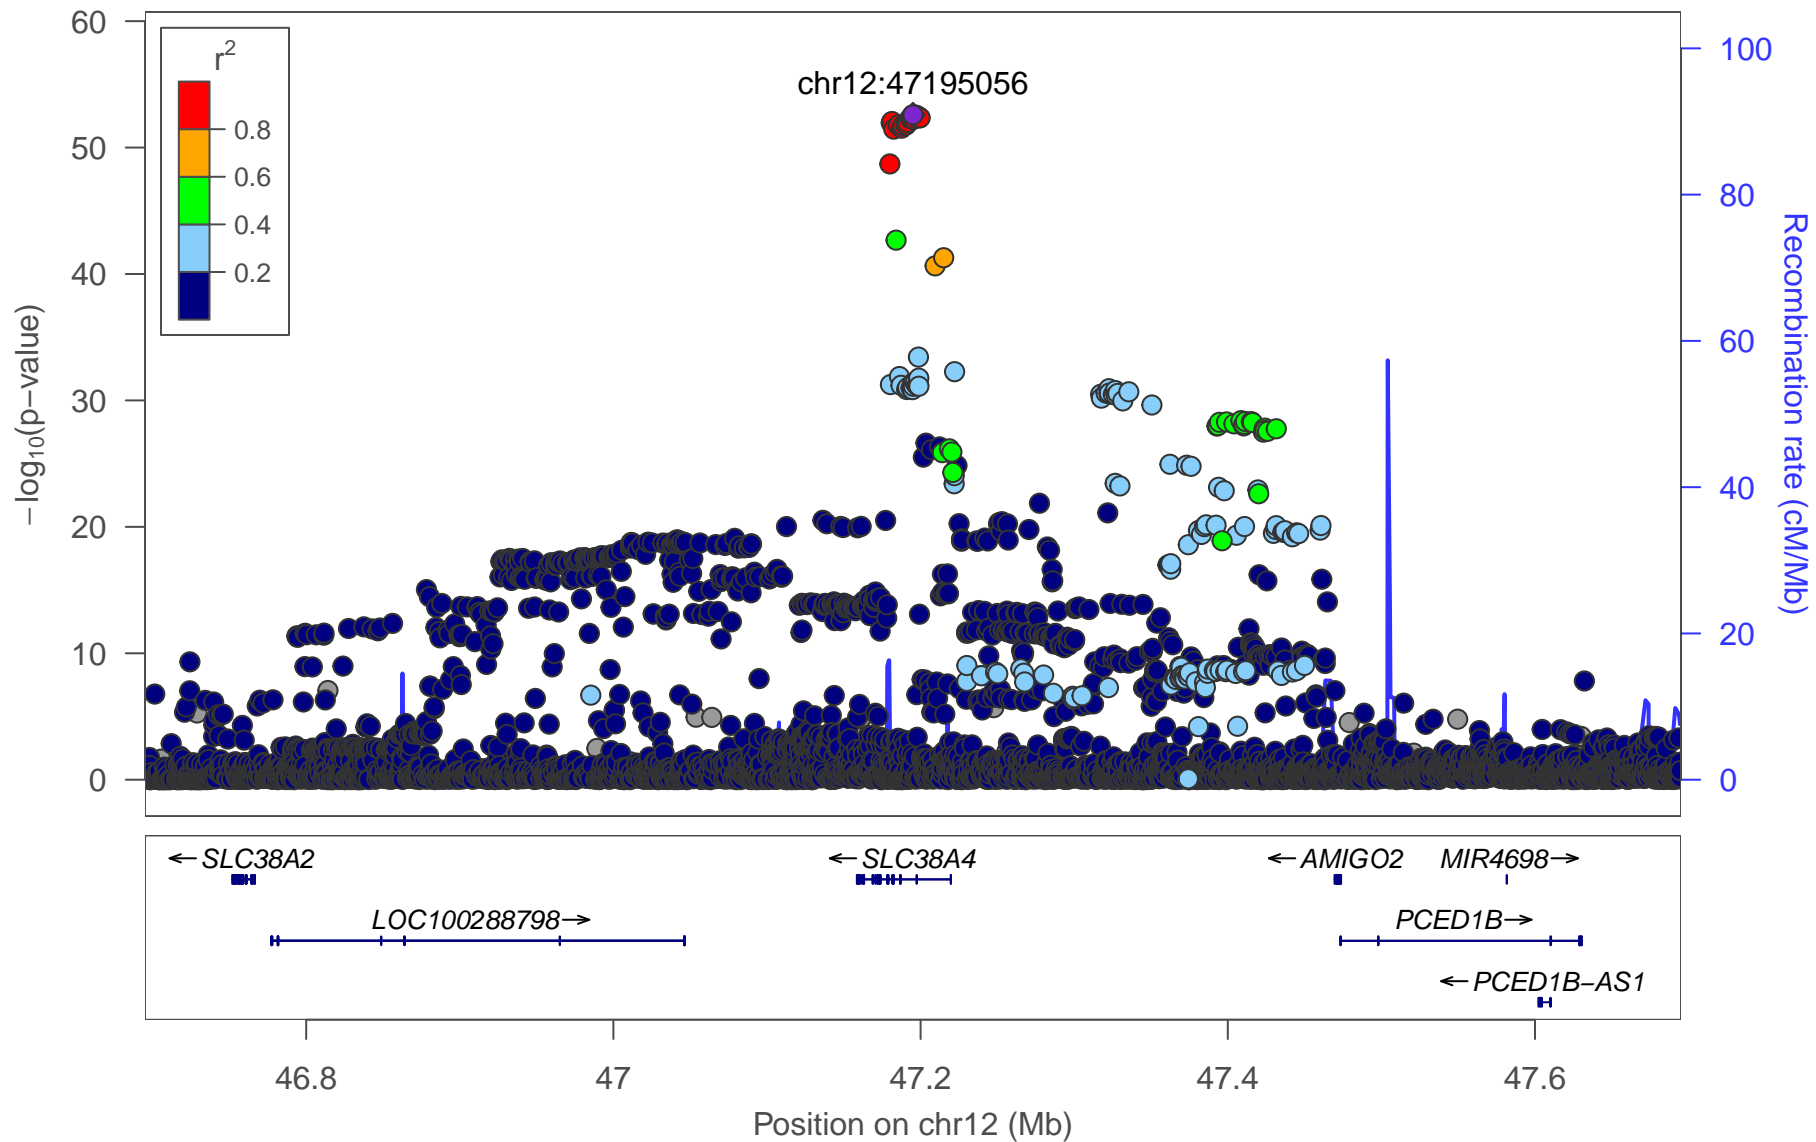



# 12\_6:XS-VLDL-CE\_percent

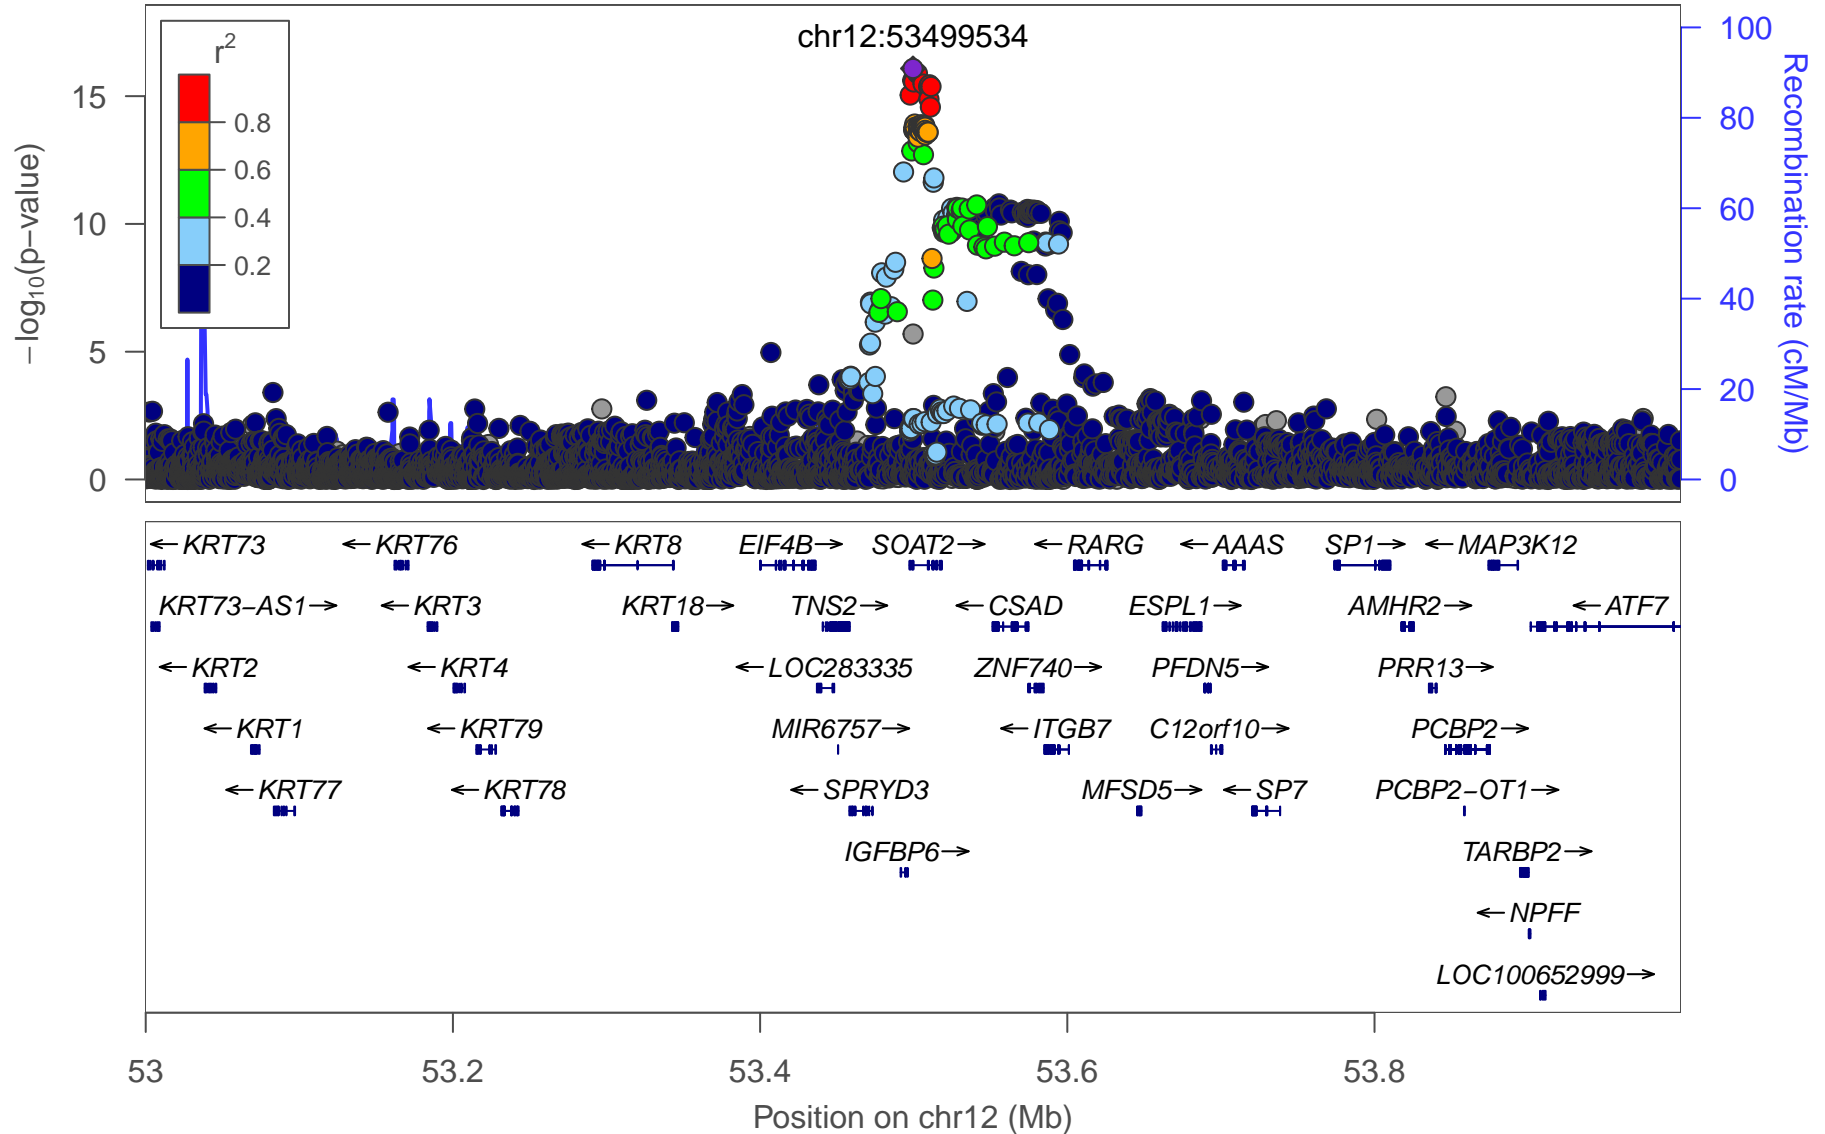

# 12\_7:Gln

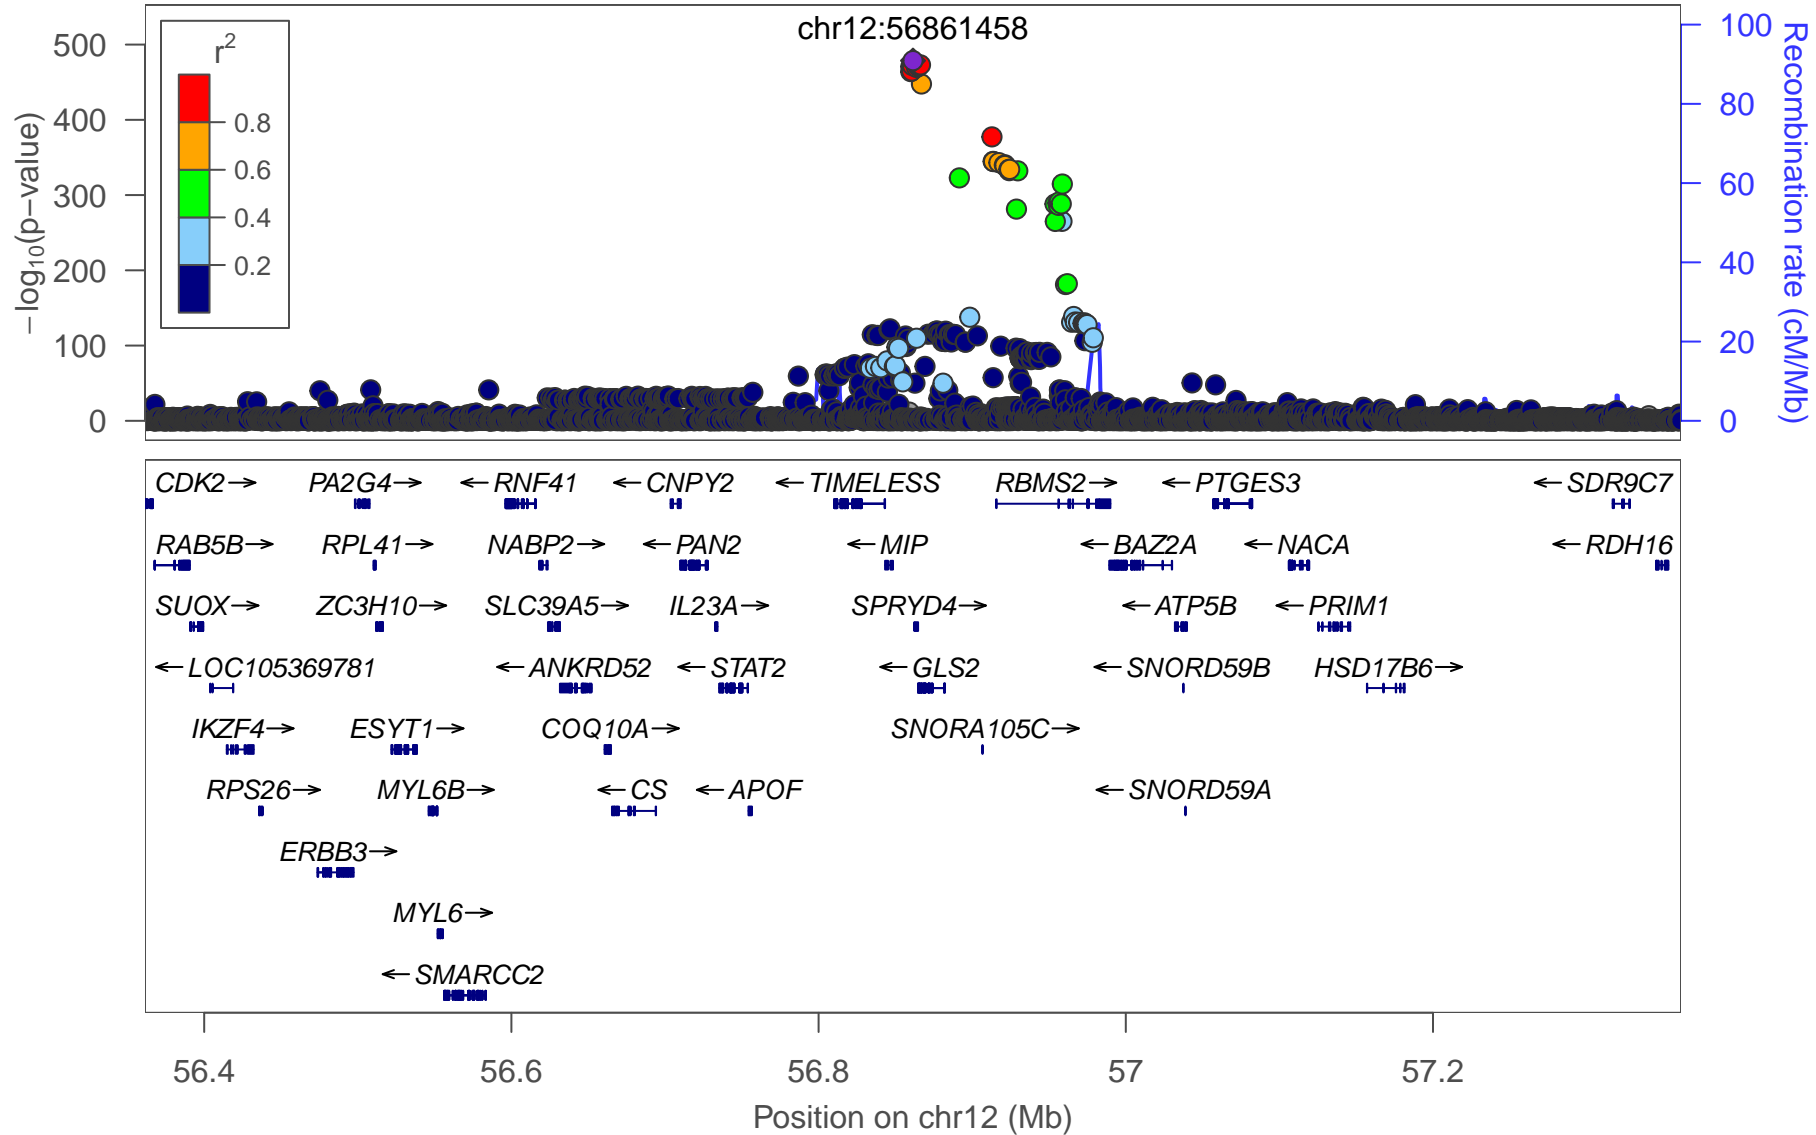

# 12\_8:Gln

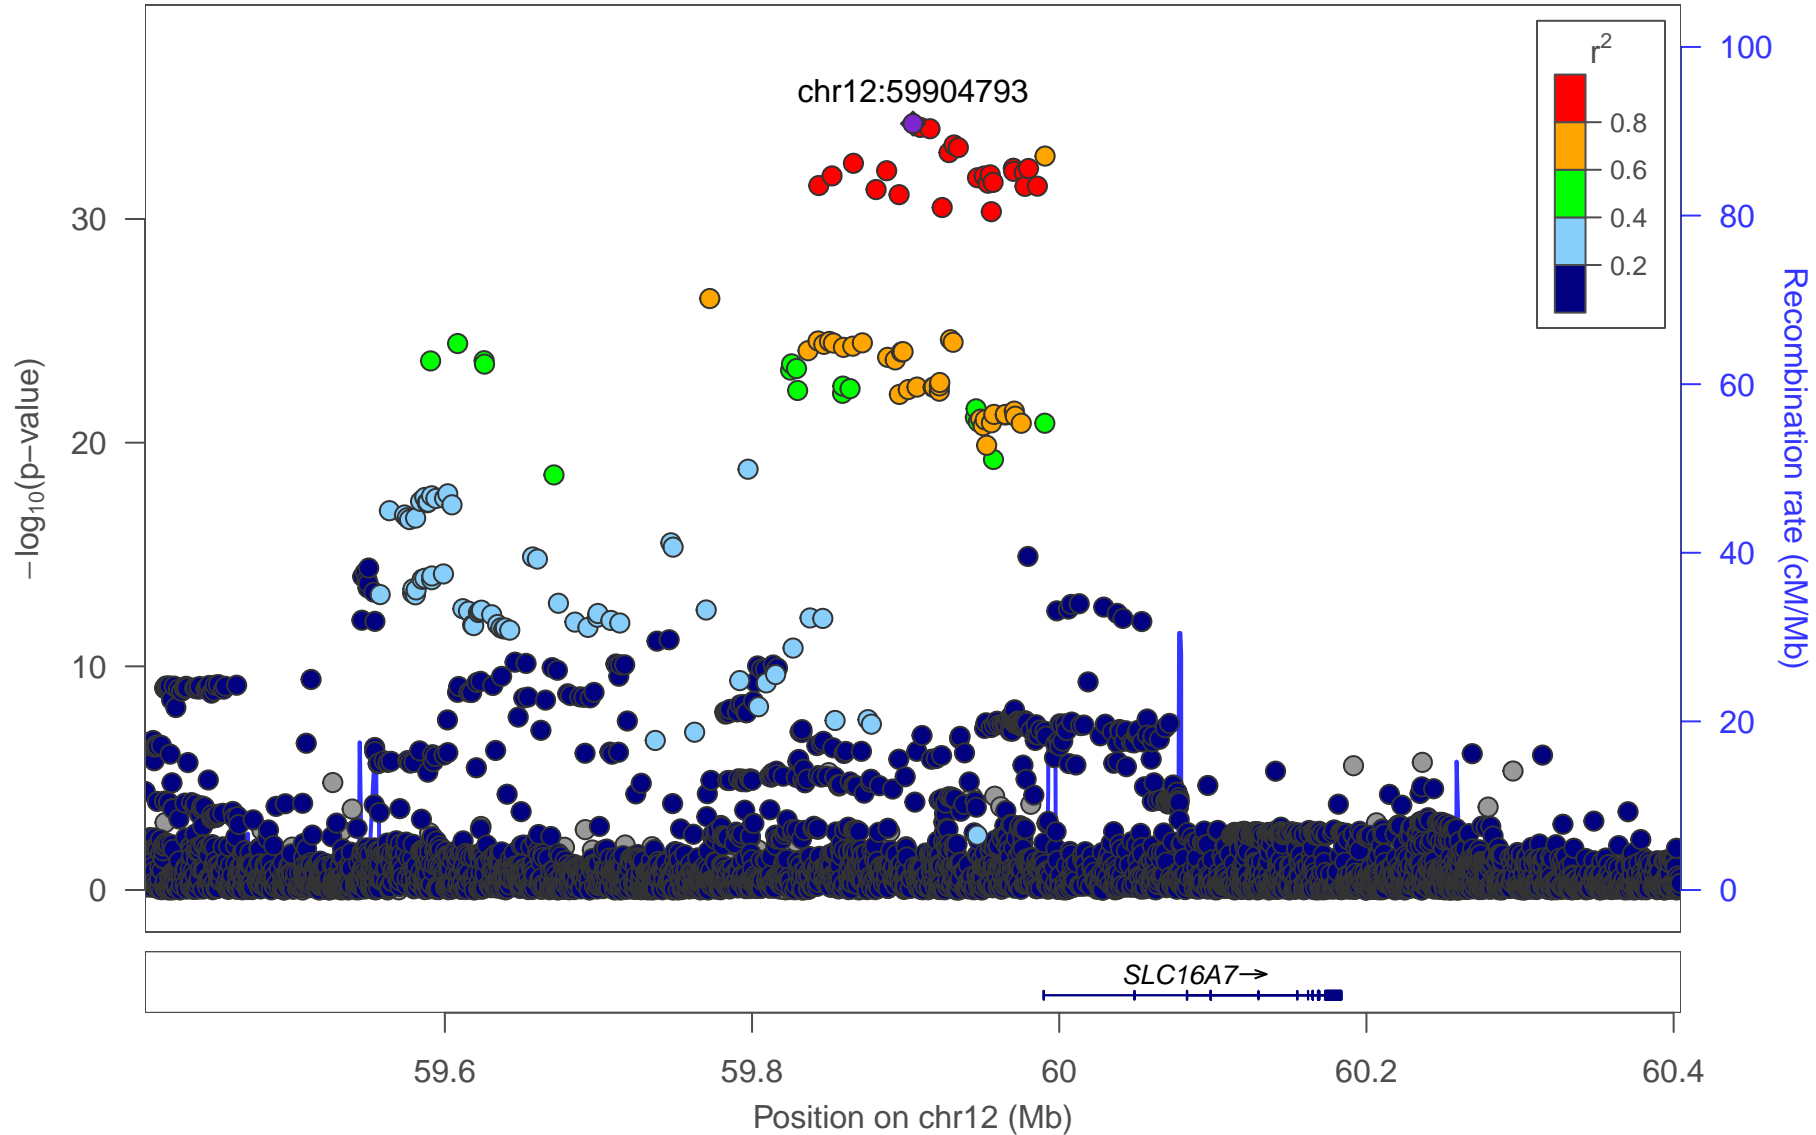

# 12\_9:His

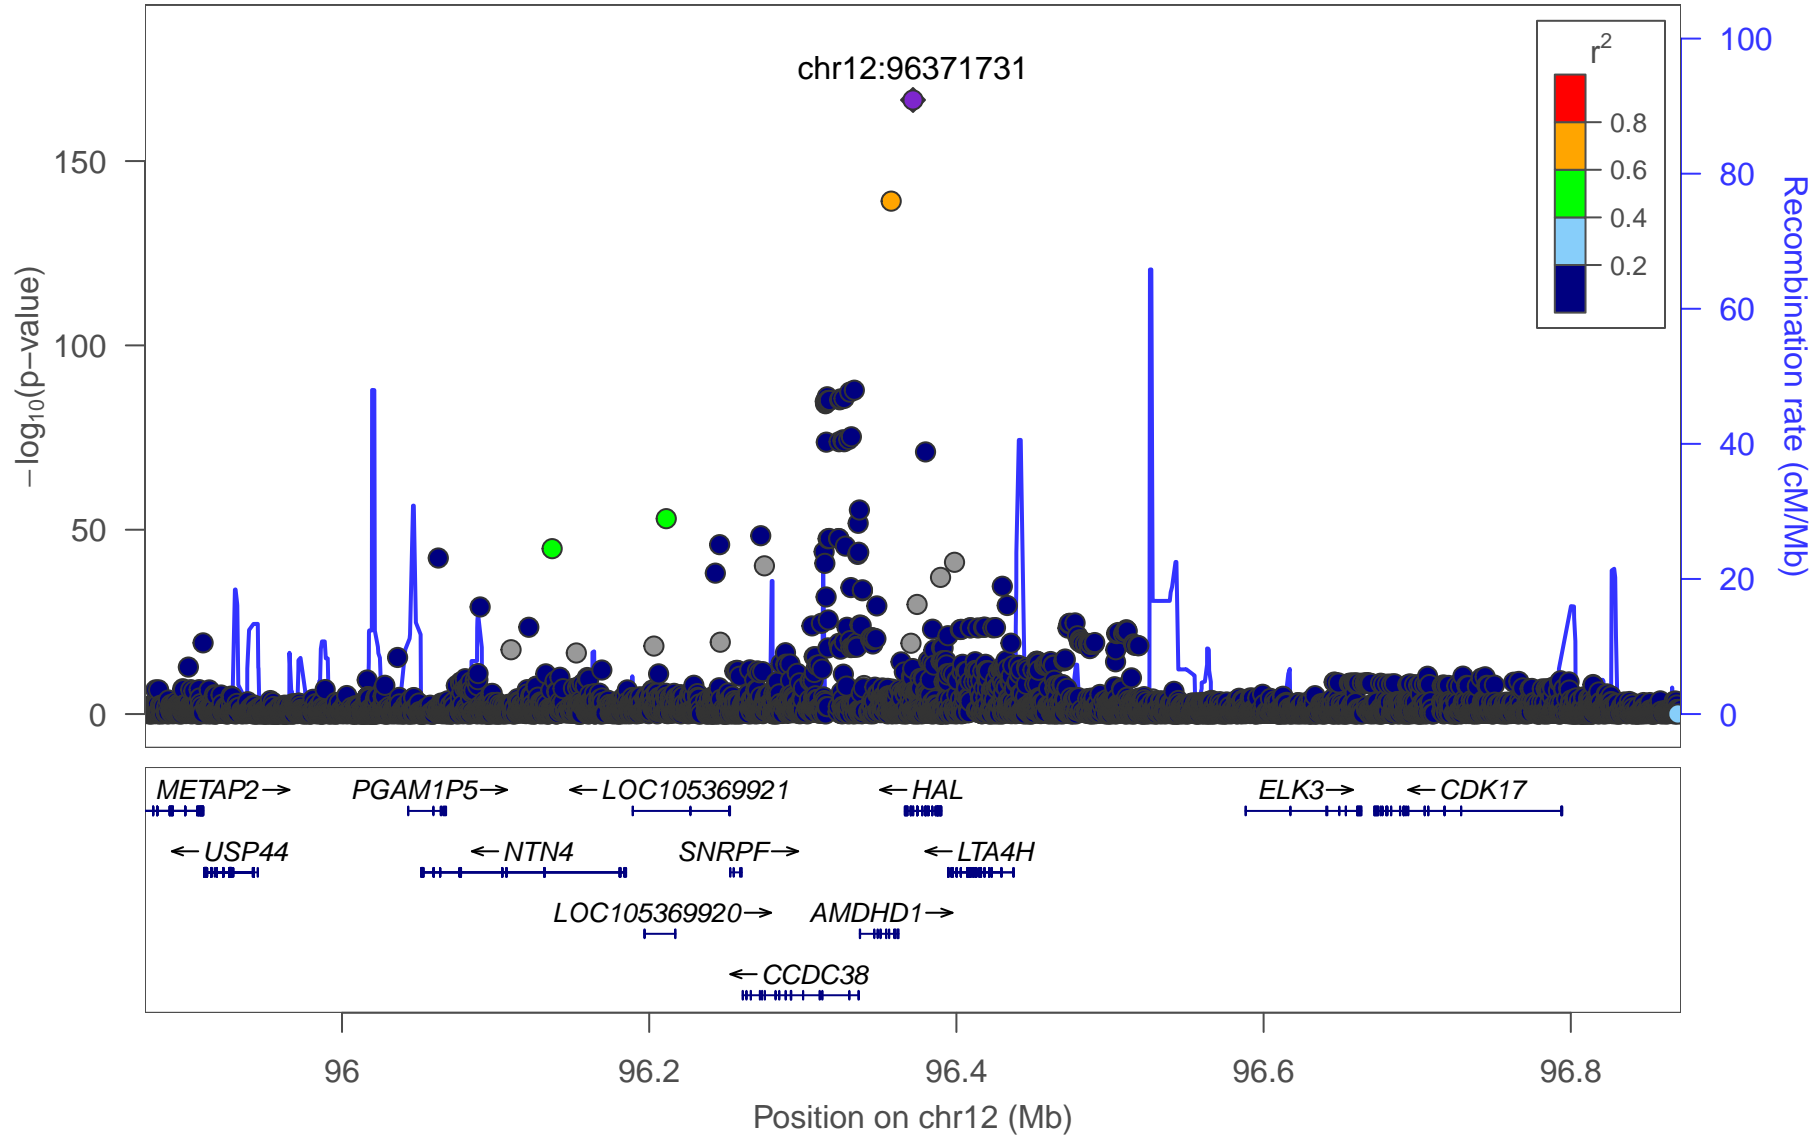

# 12\_10:Phe

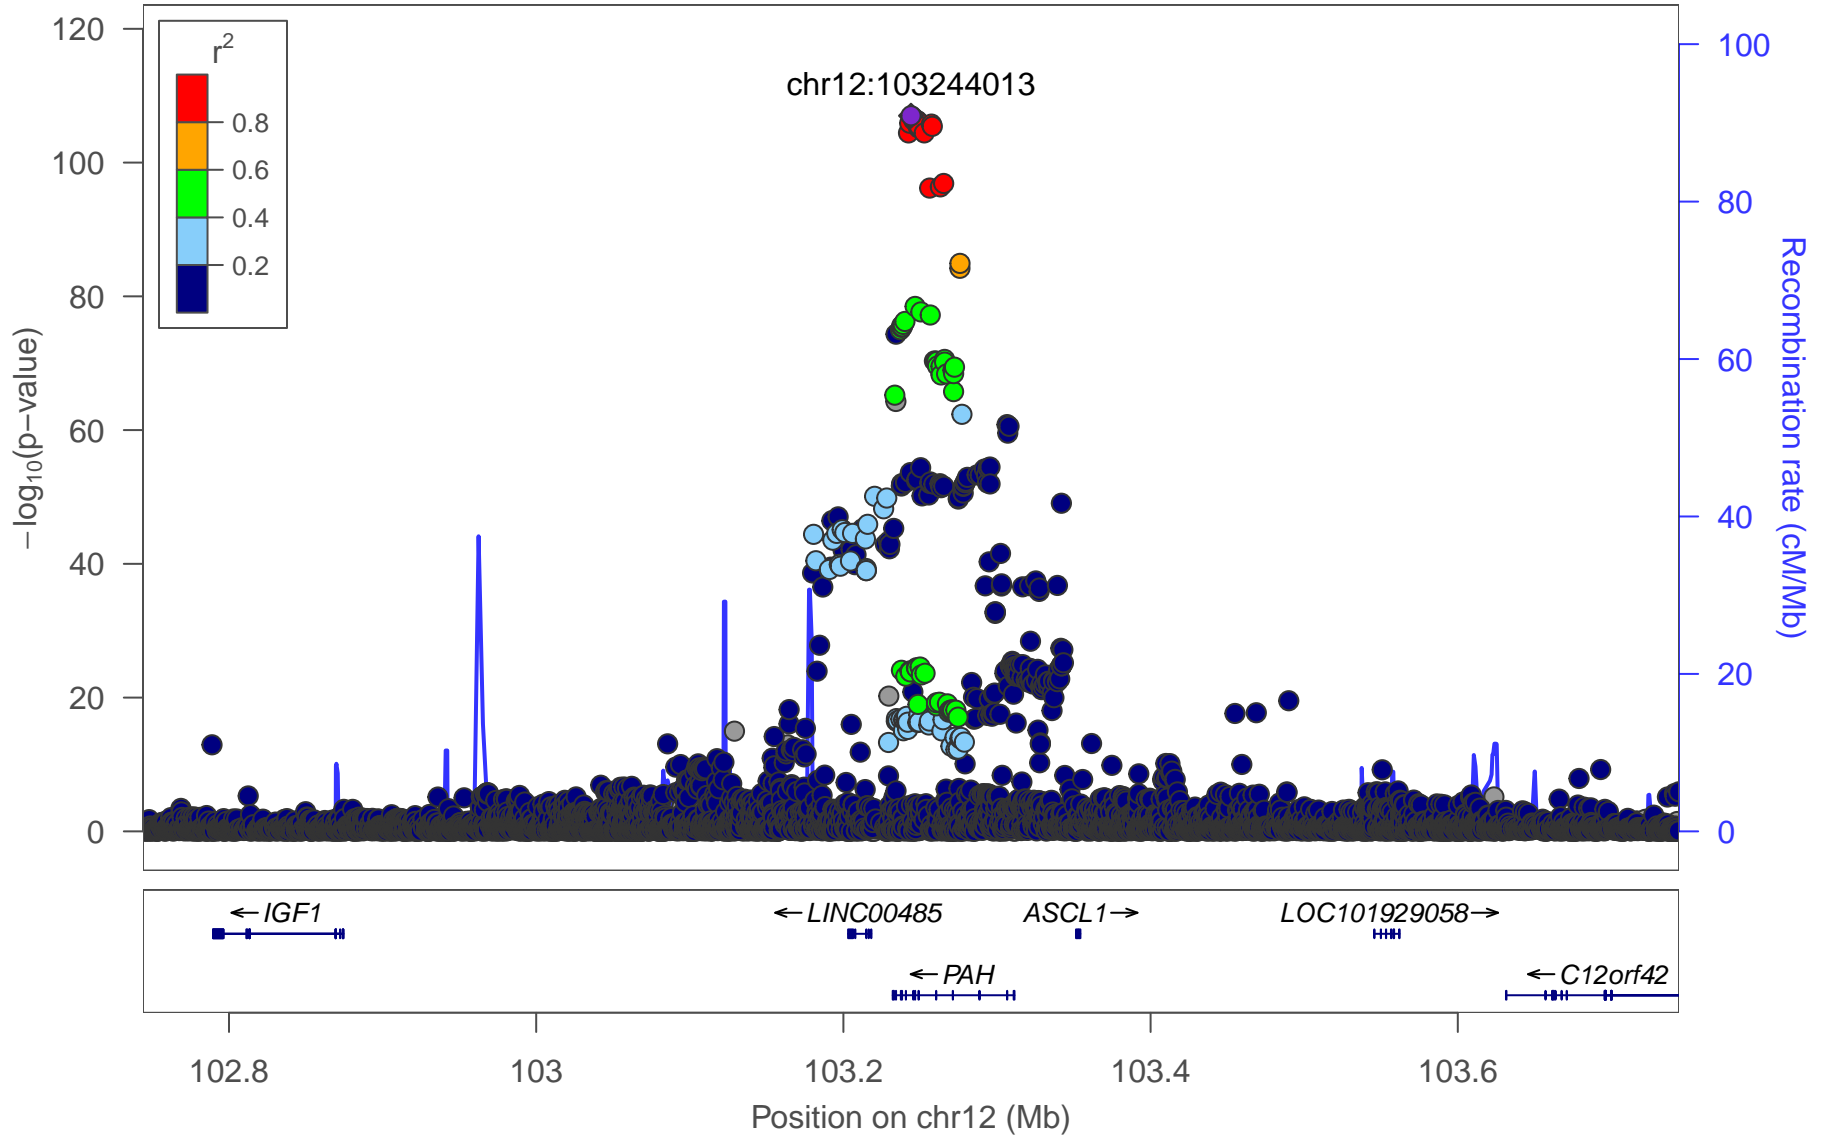

# 12\_11:HDL-D

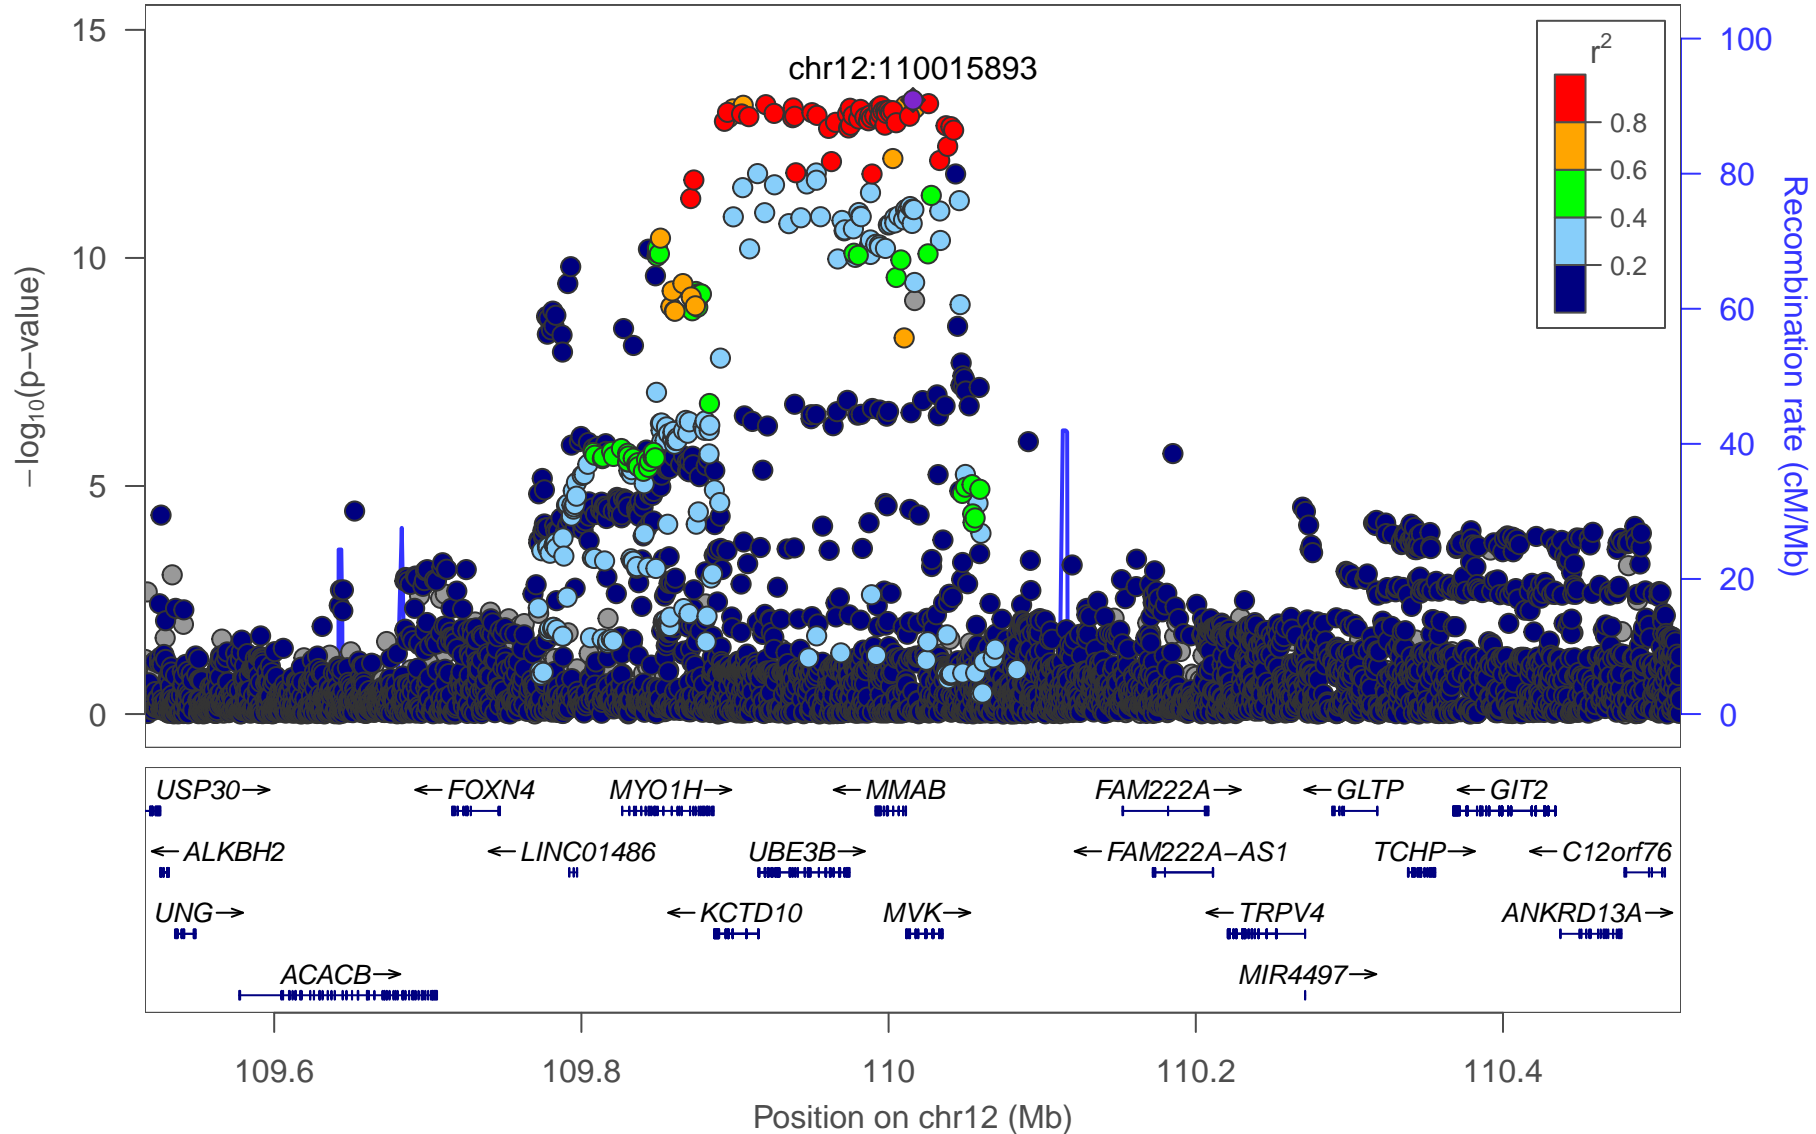

# 12\_12:SM

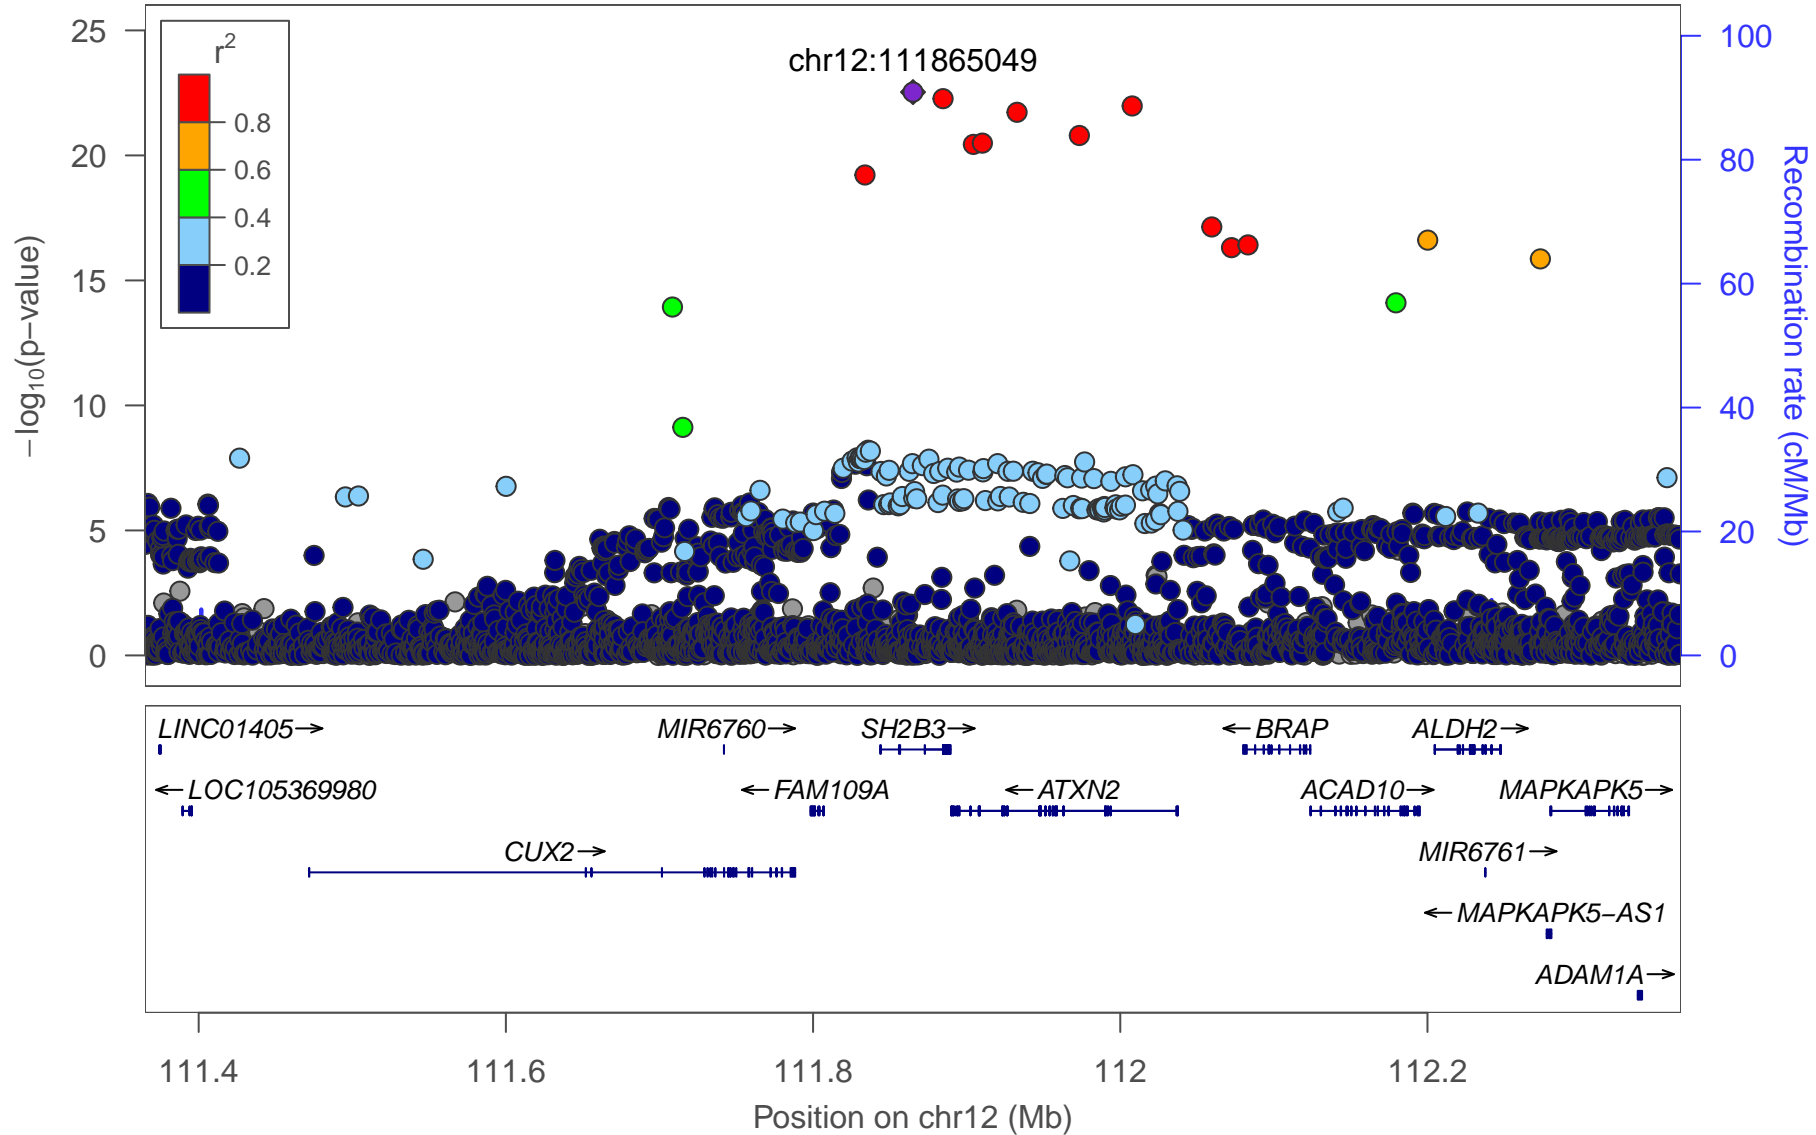

# 12\_13:Tyr

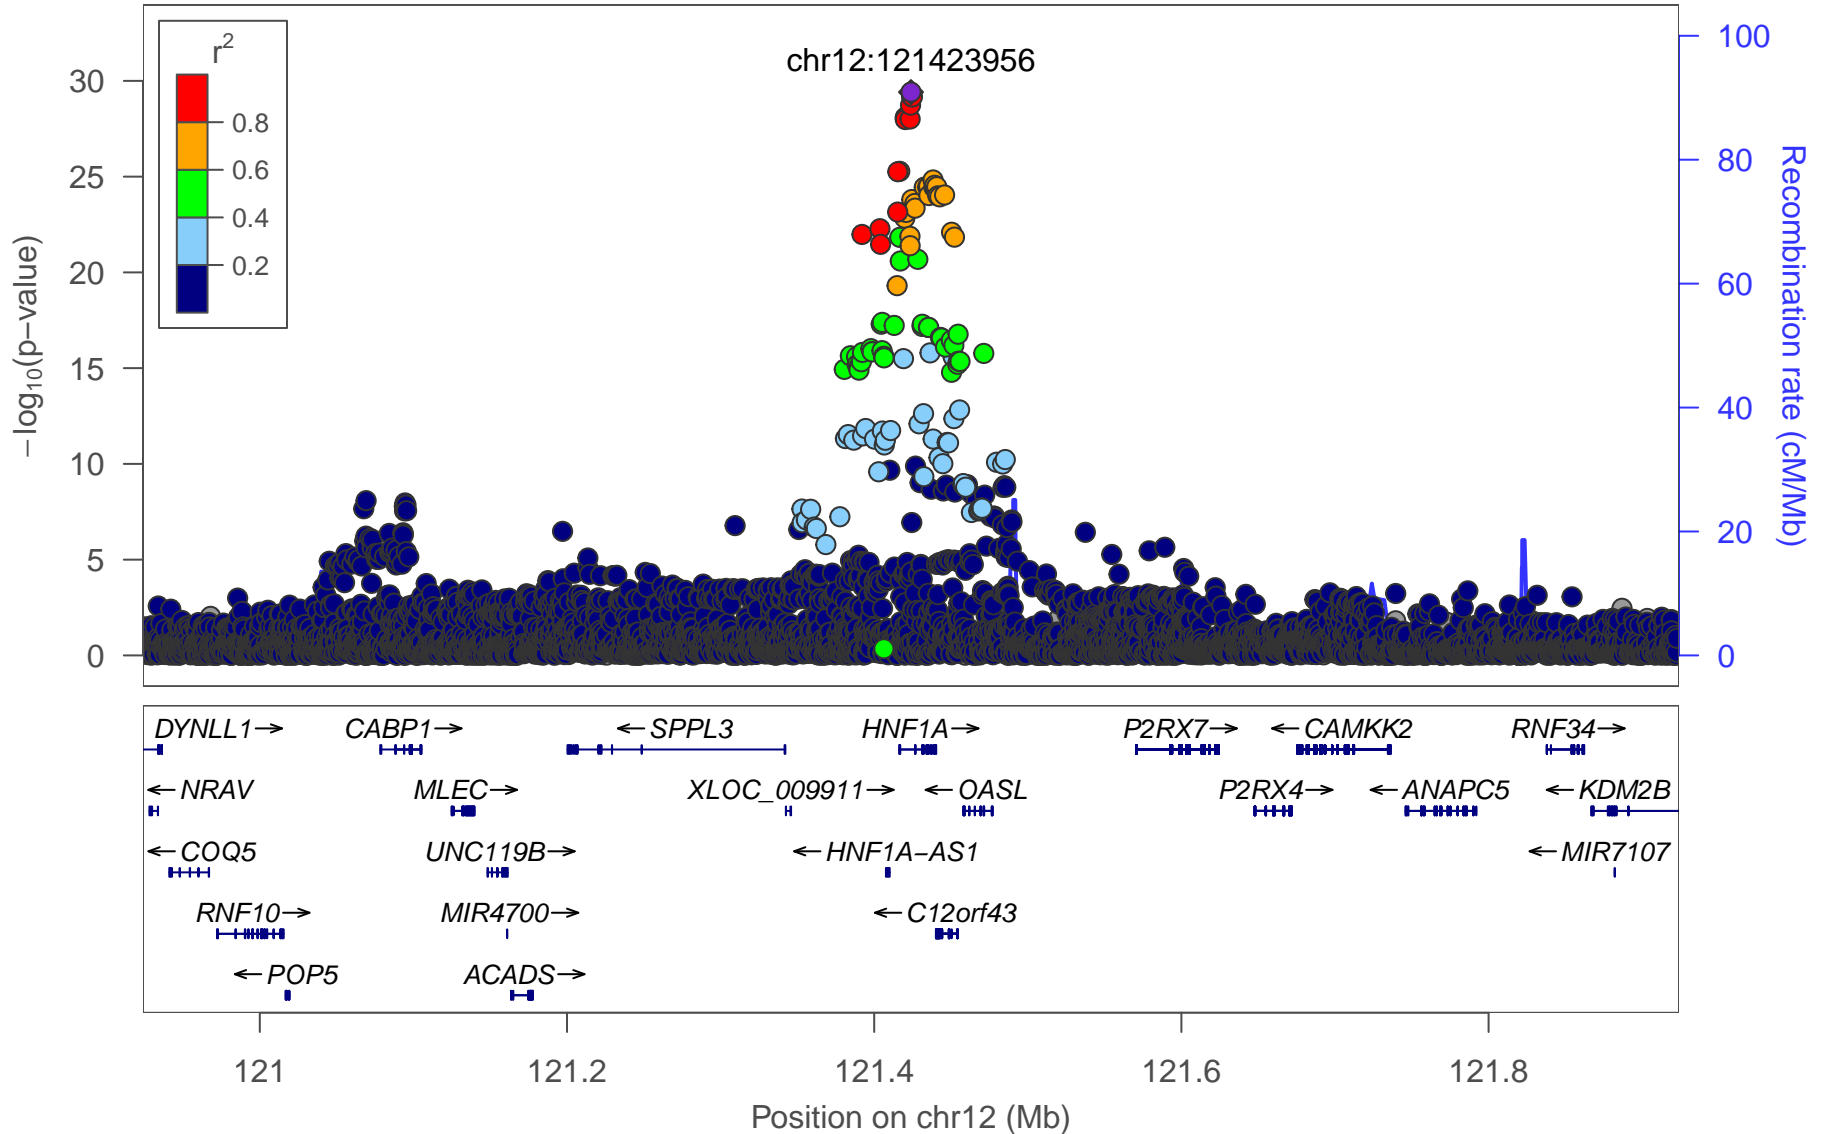



# 13\_1:XS-VLDL-PL

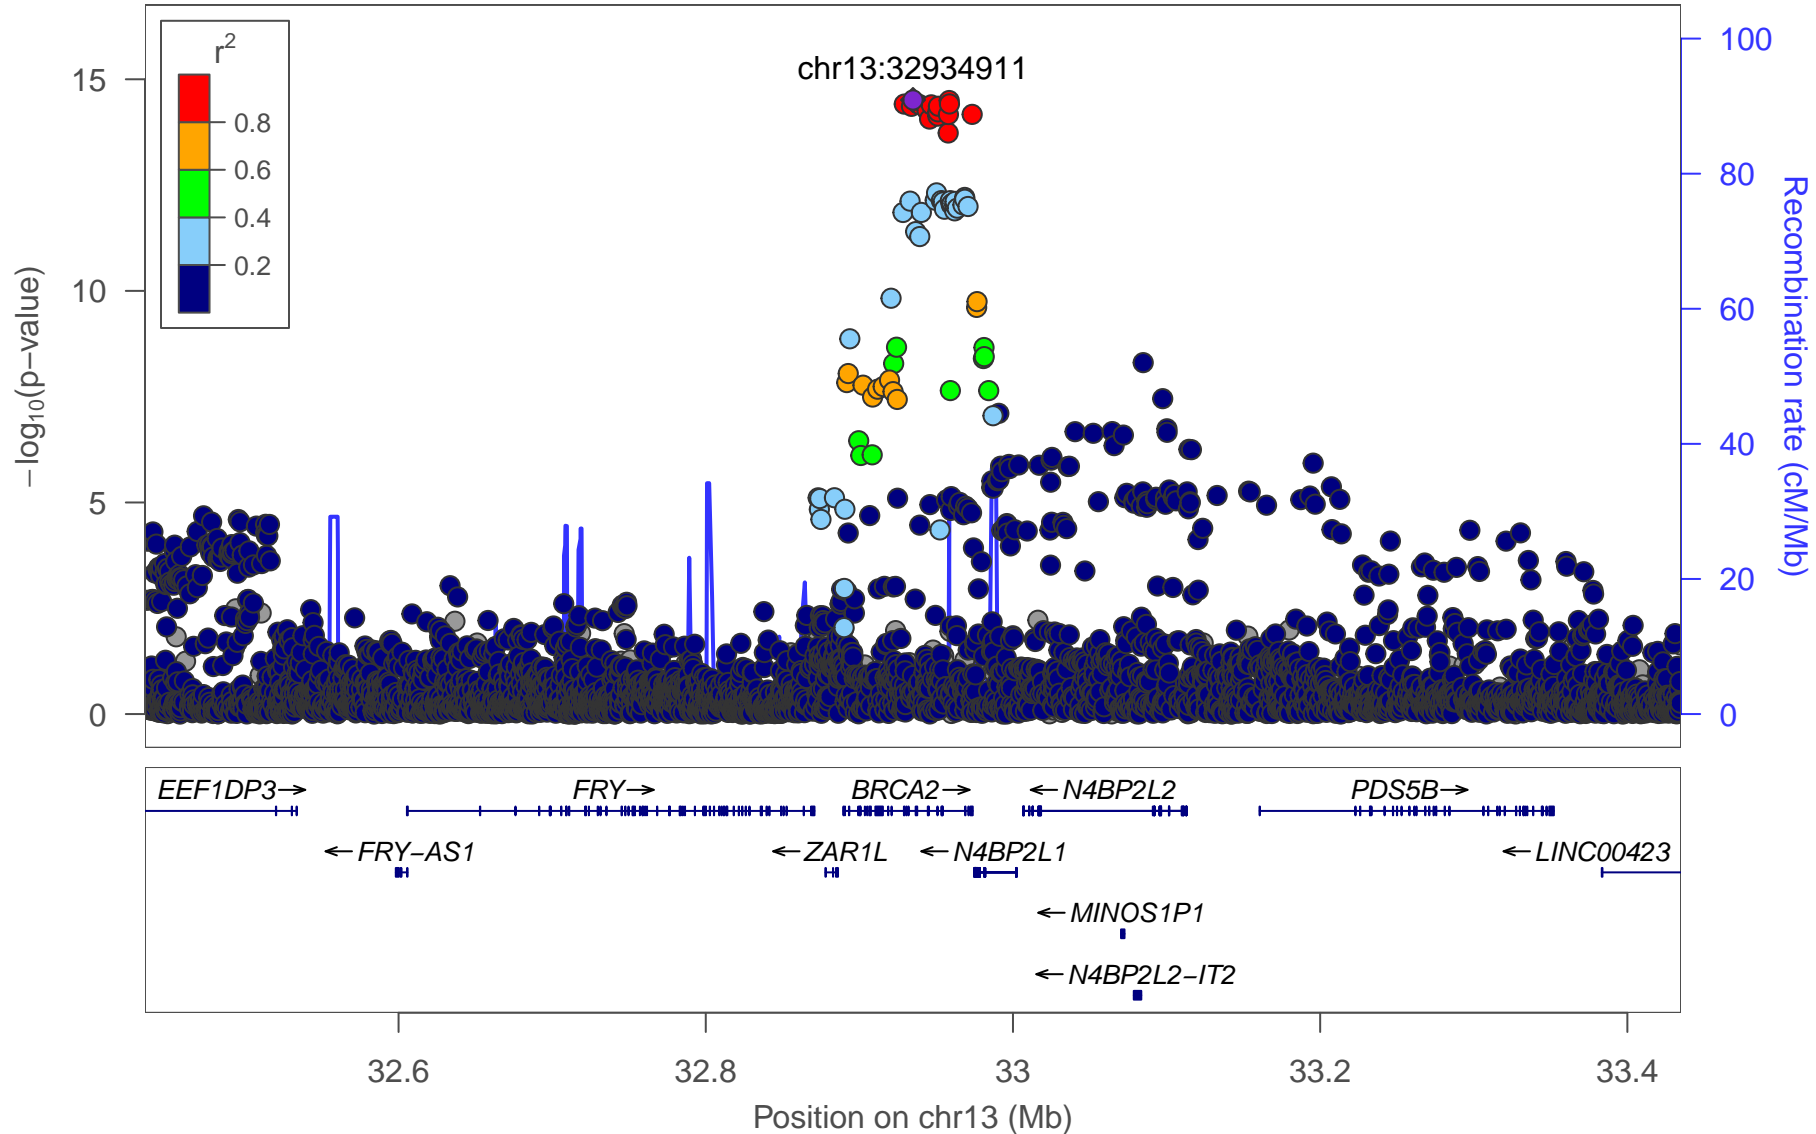

# 13\_2:Crea

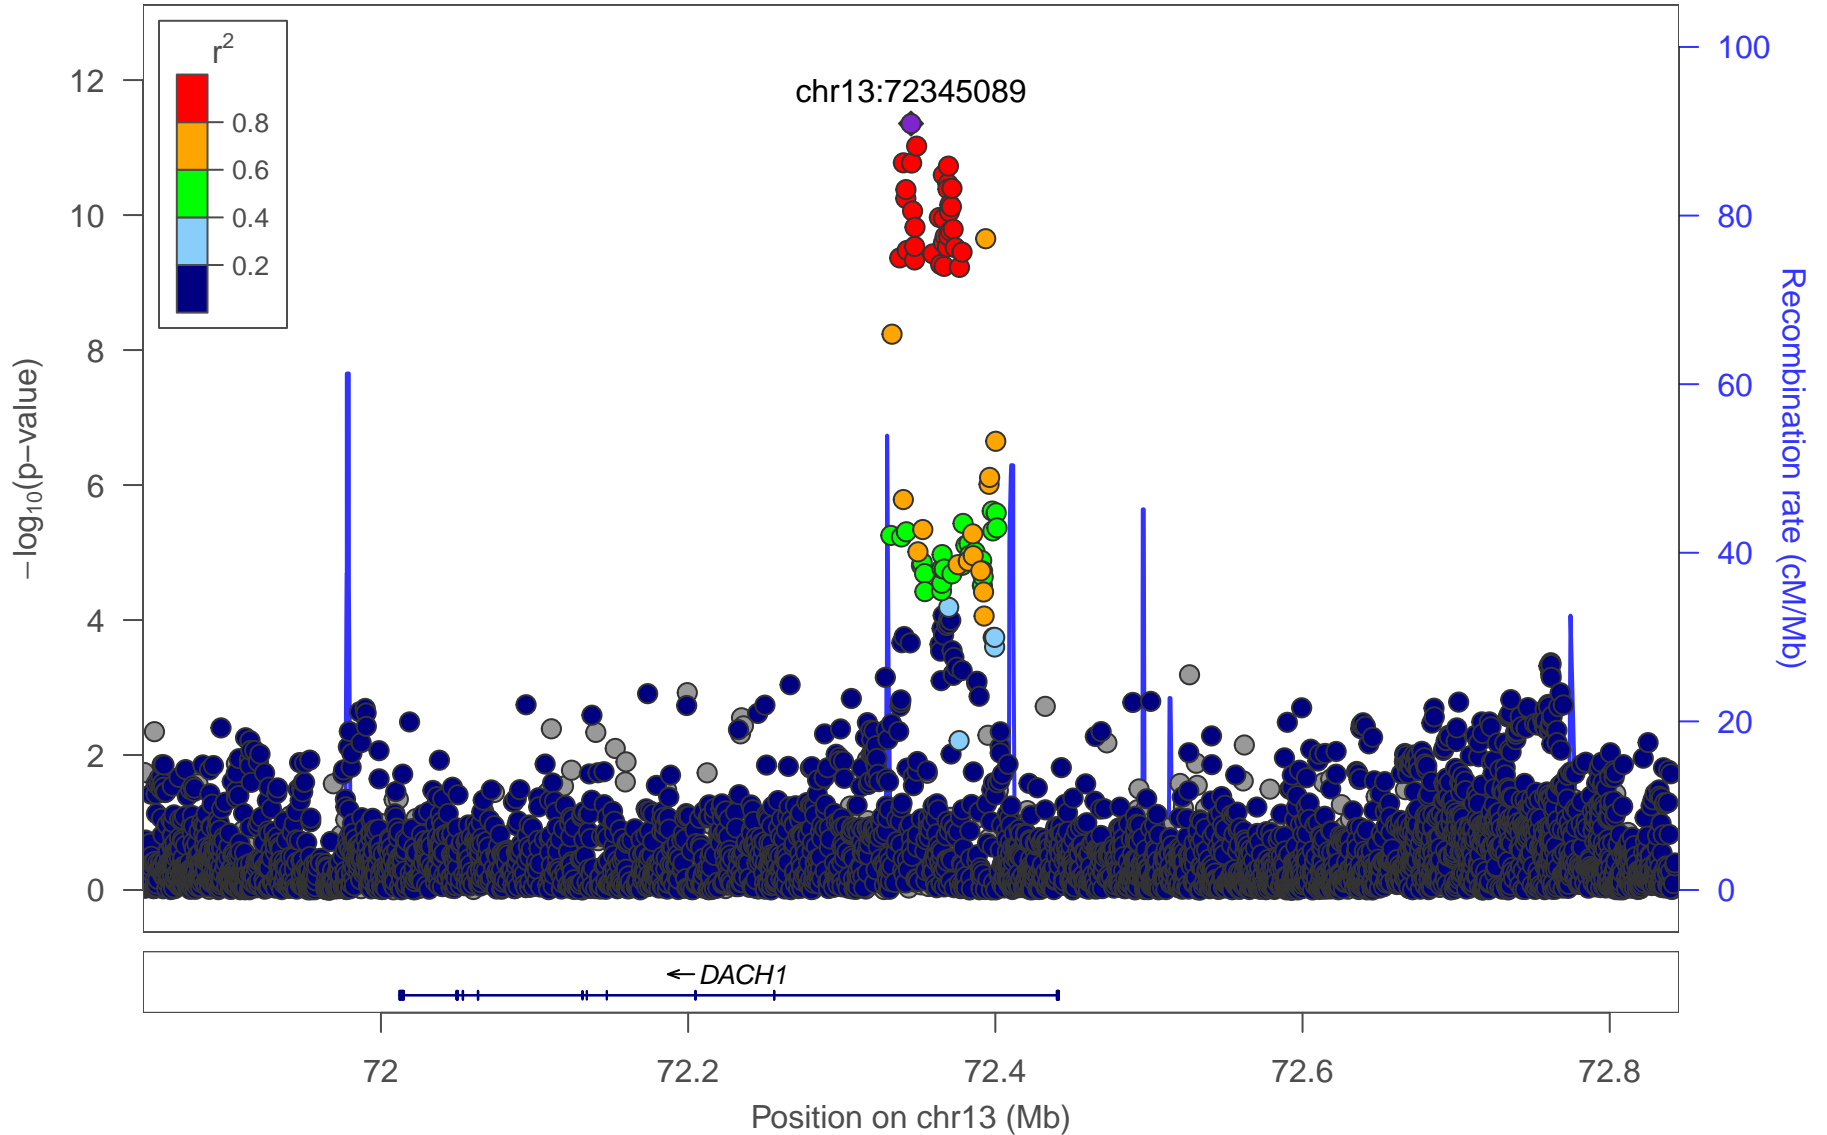

# 13\_3:S-HDL-C\_percent

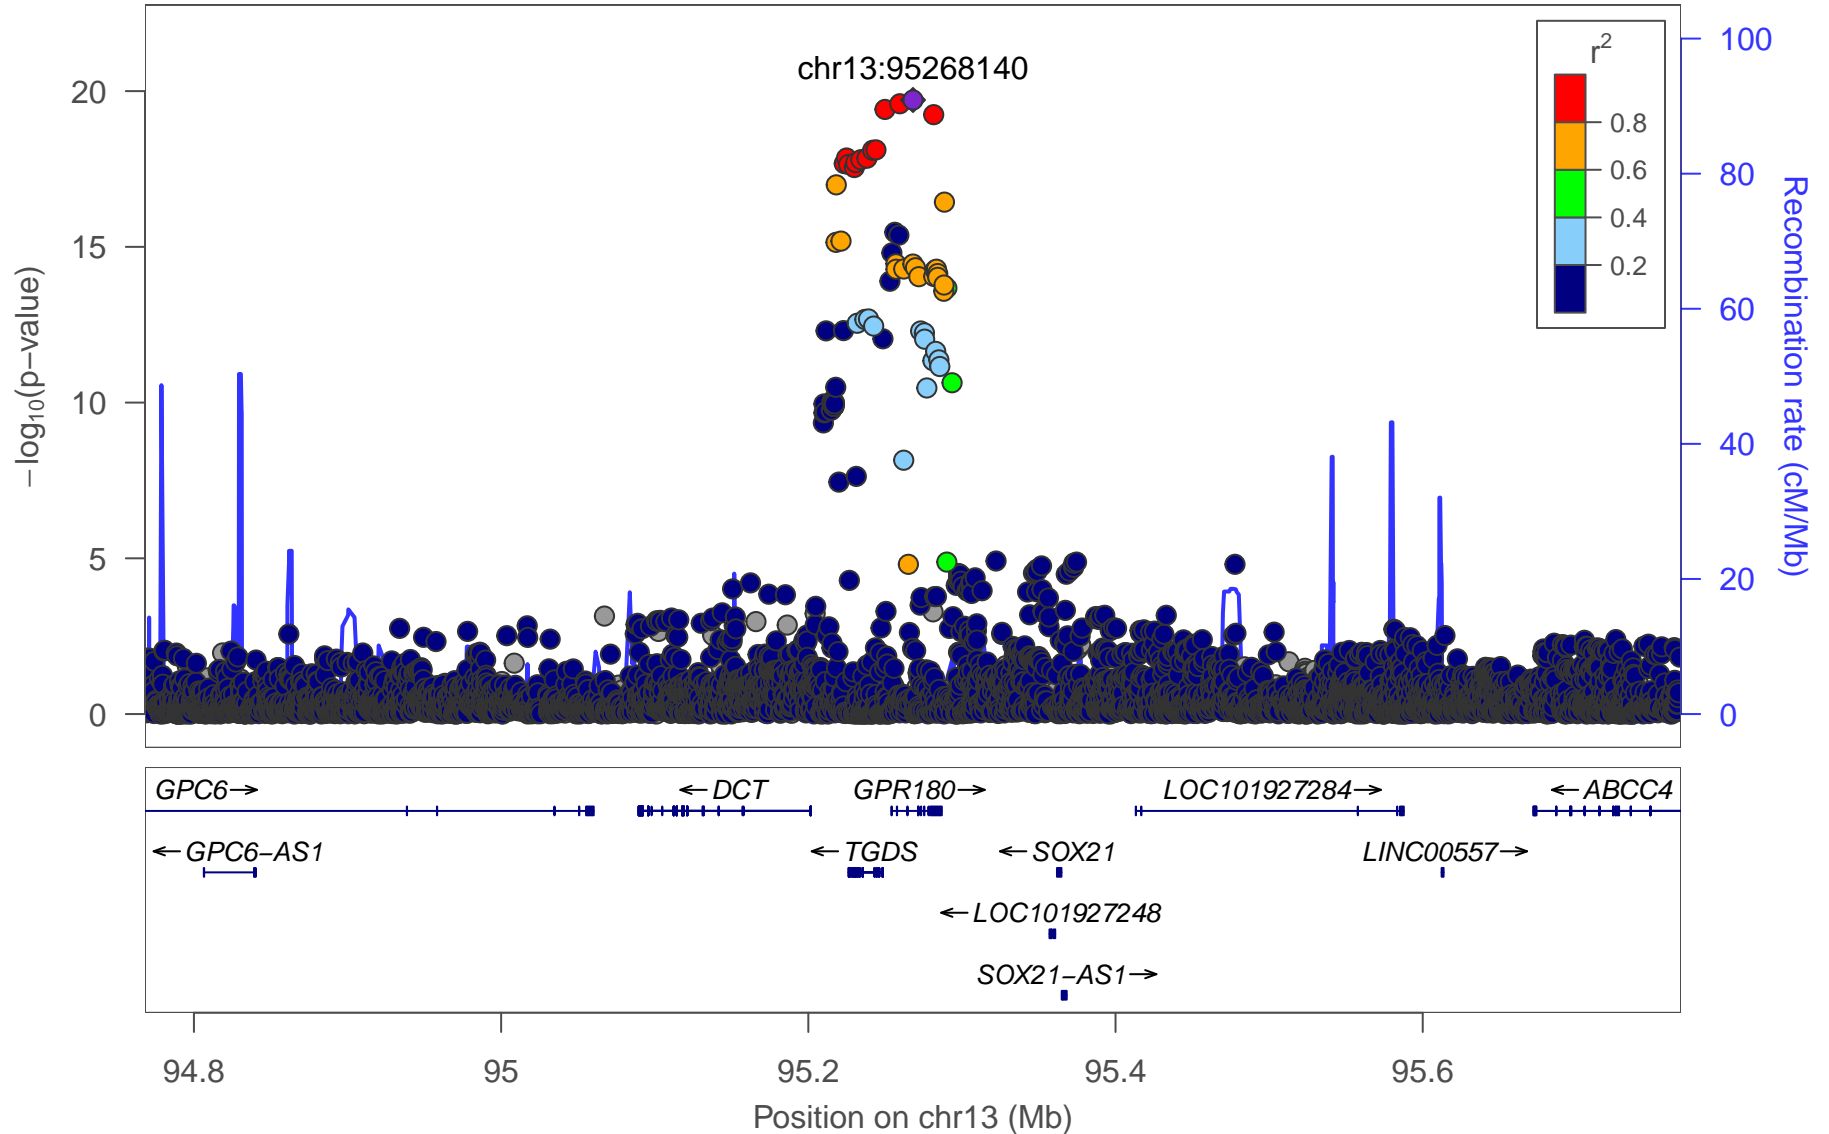

# 13\_4:XS-VLDL-TG

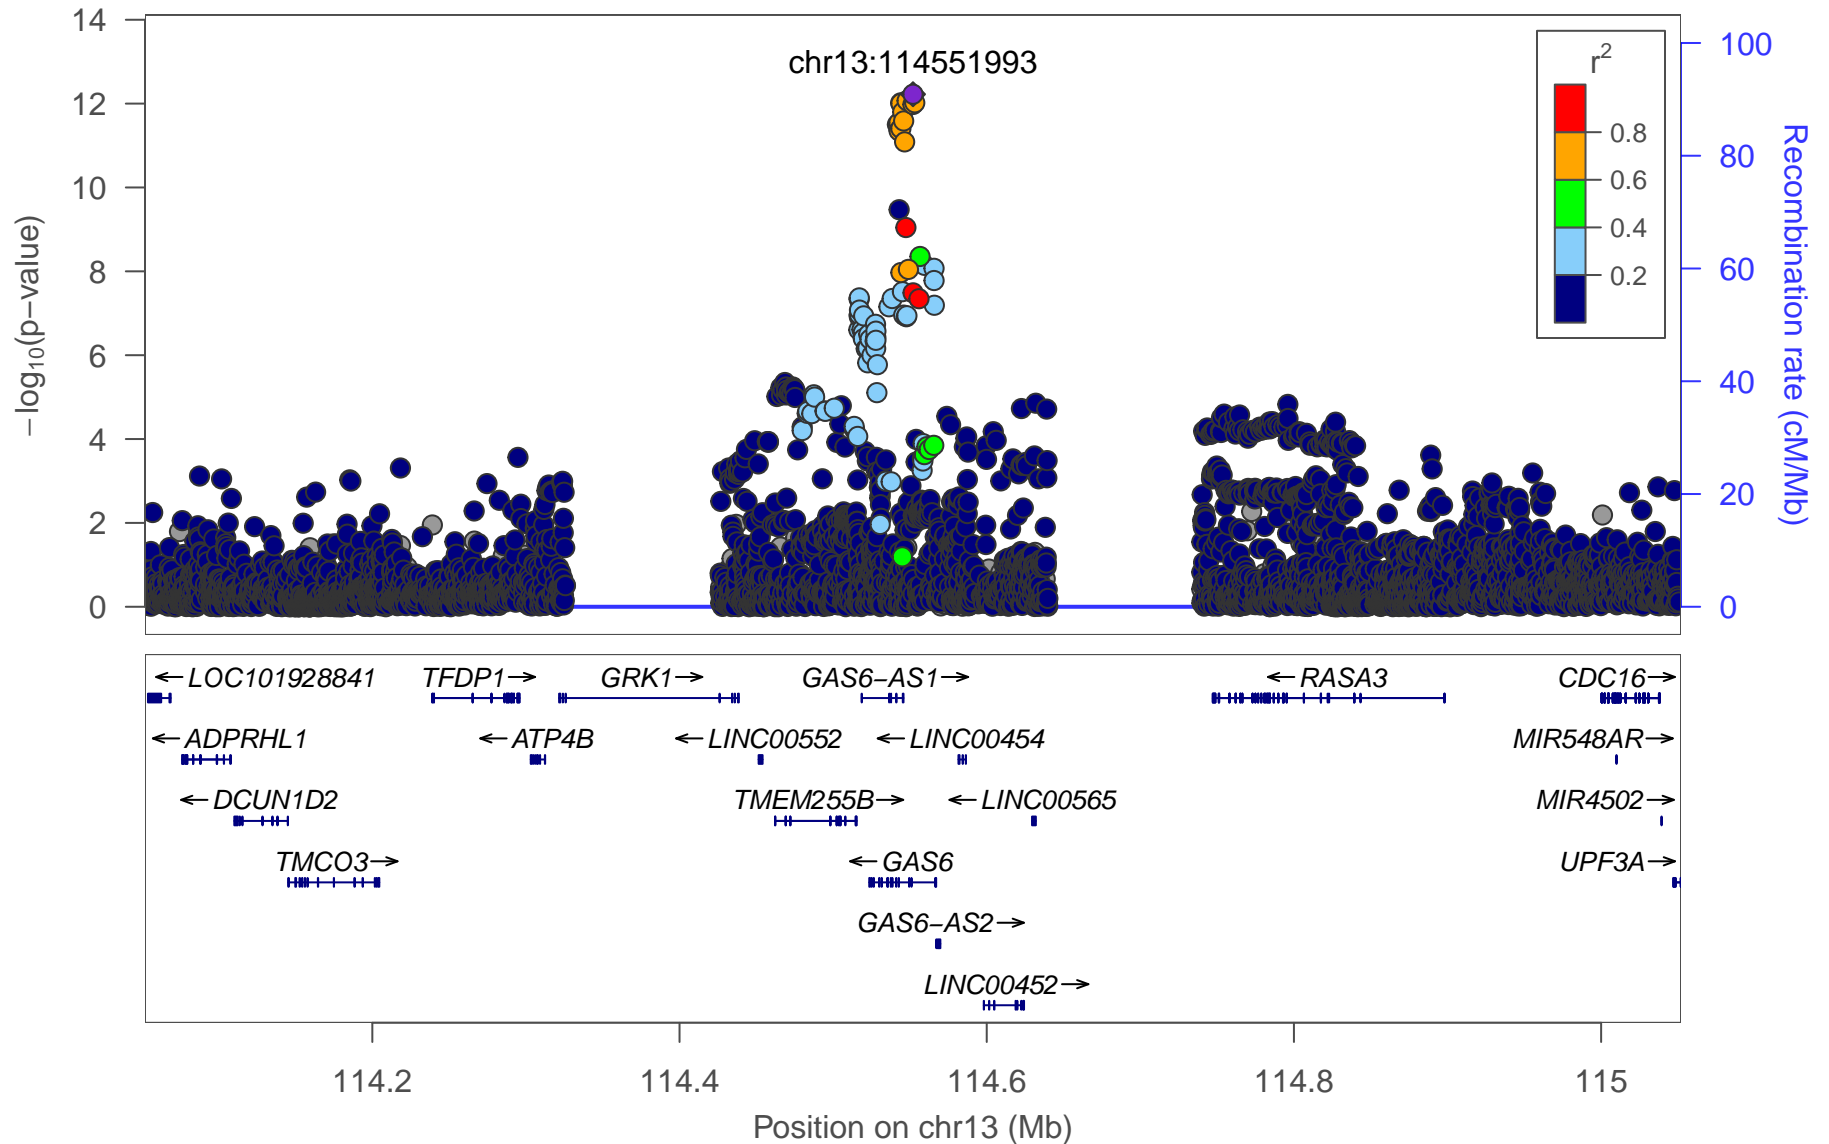

# 14\_1:His

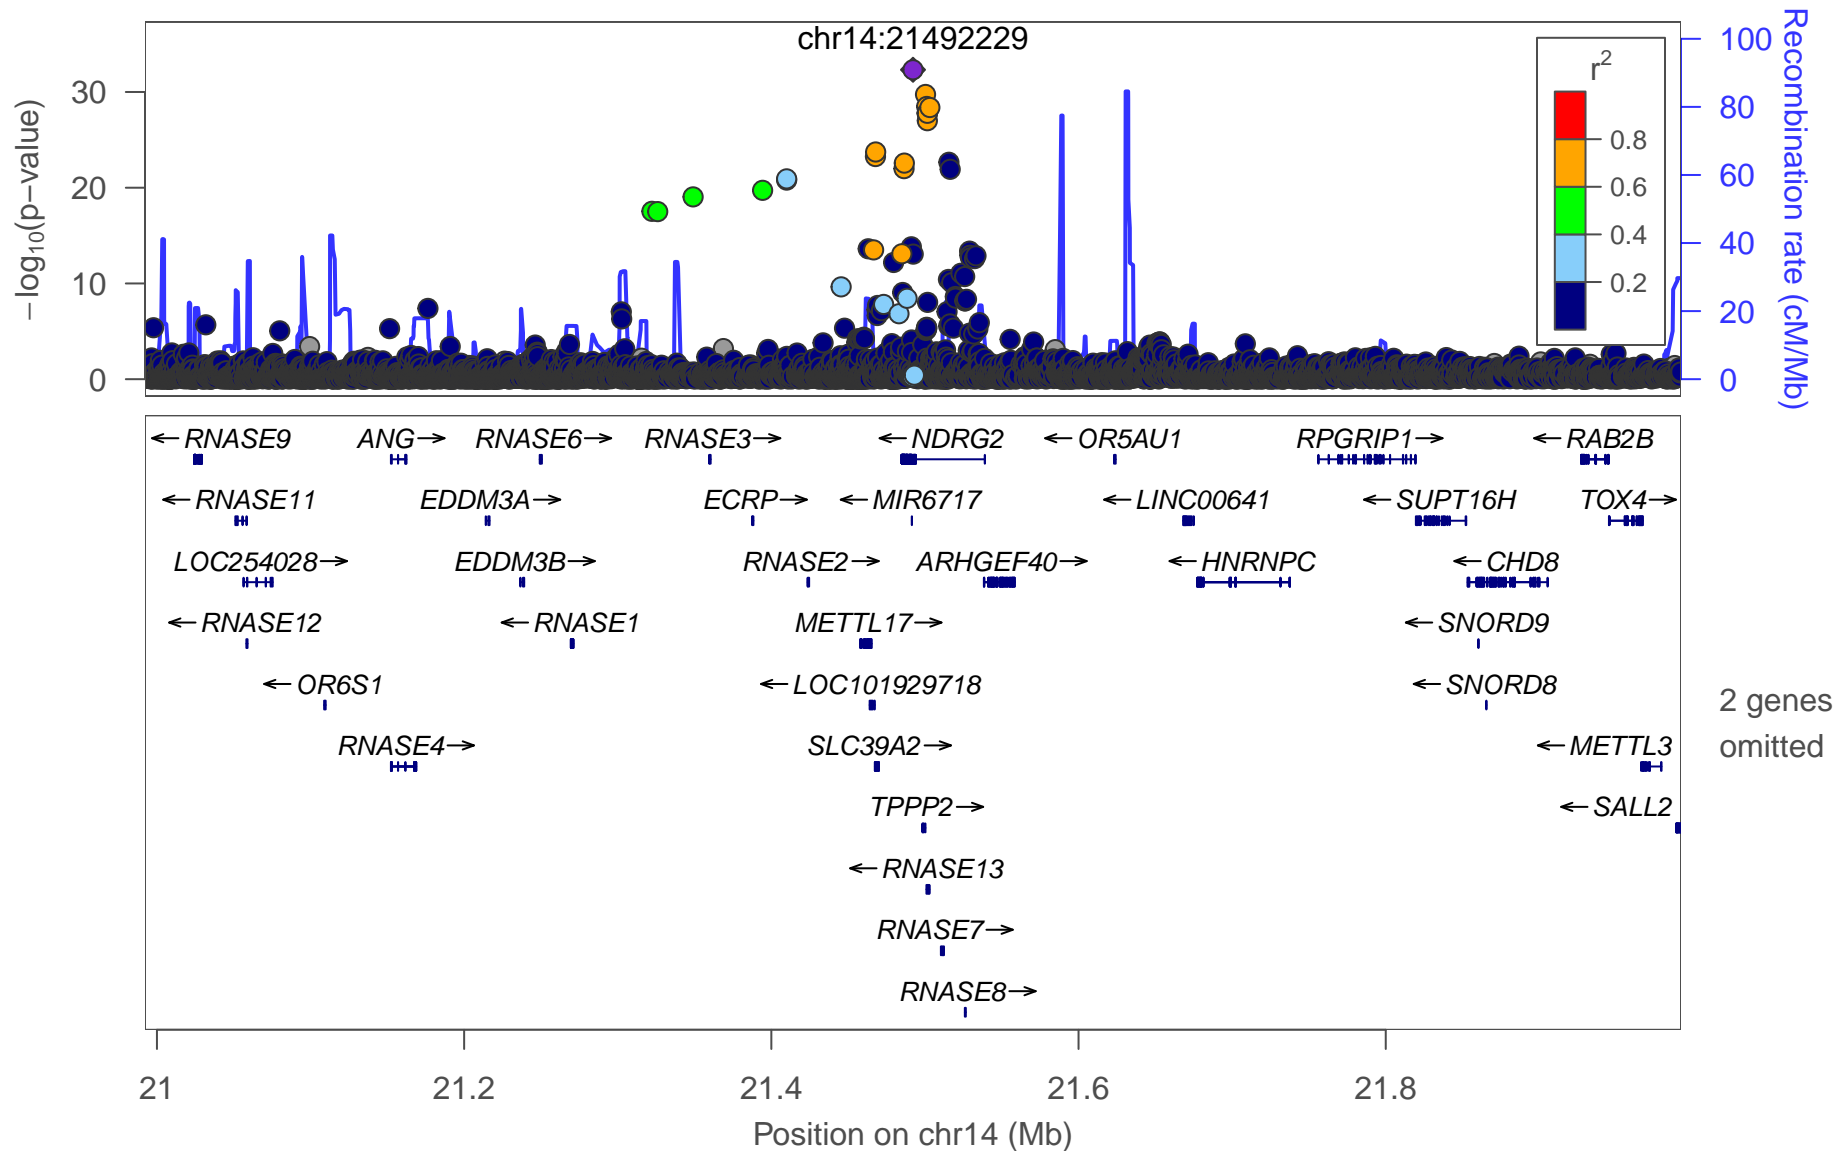

# 14\_2:His

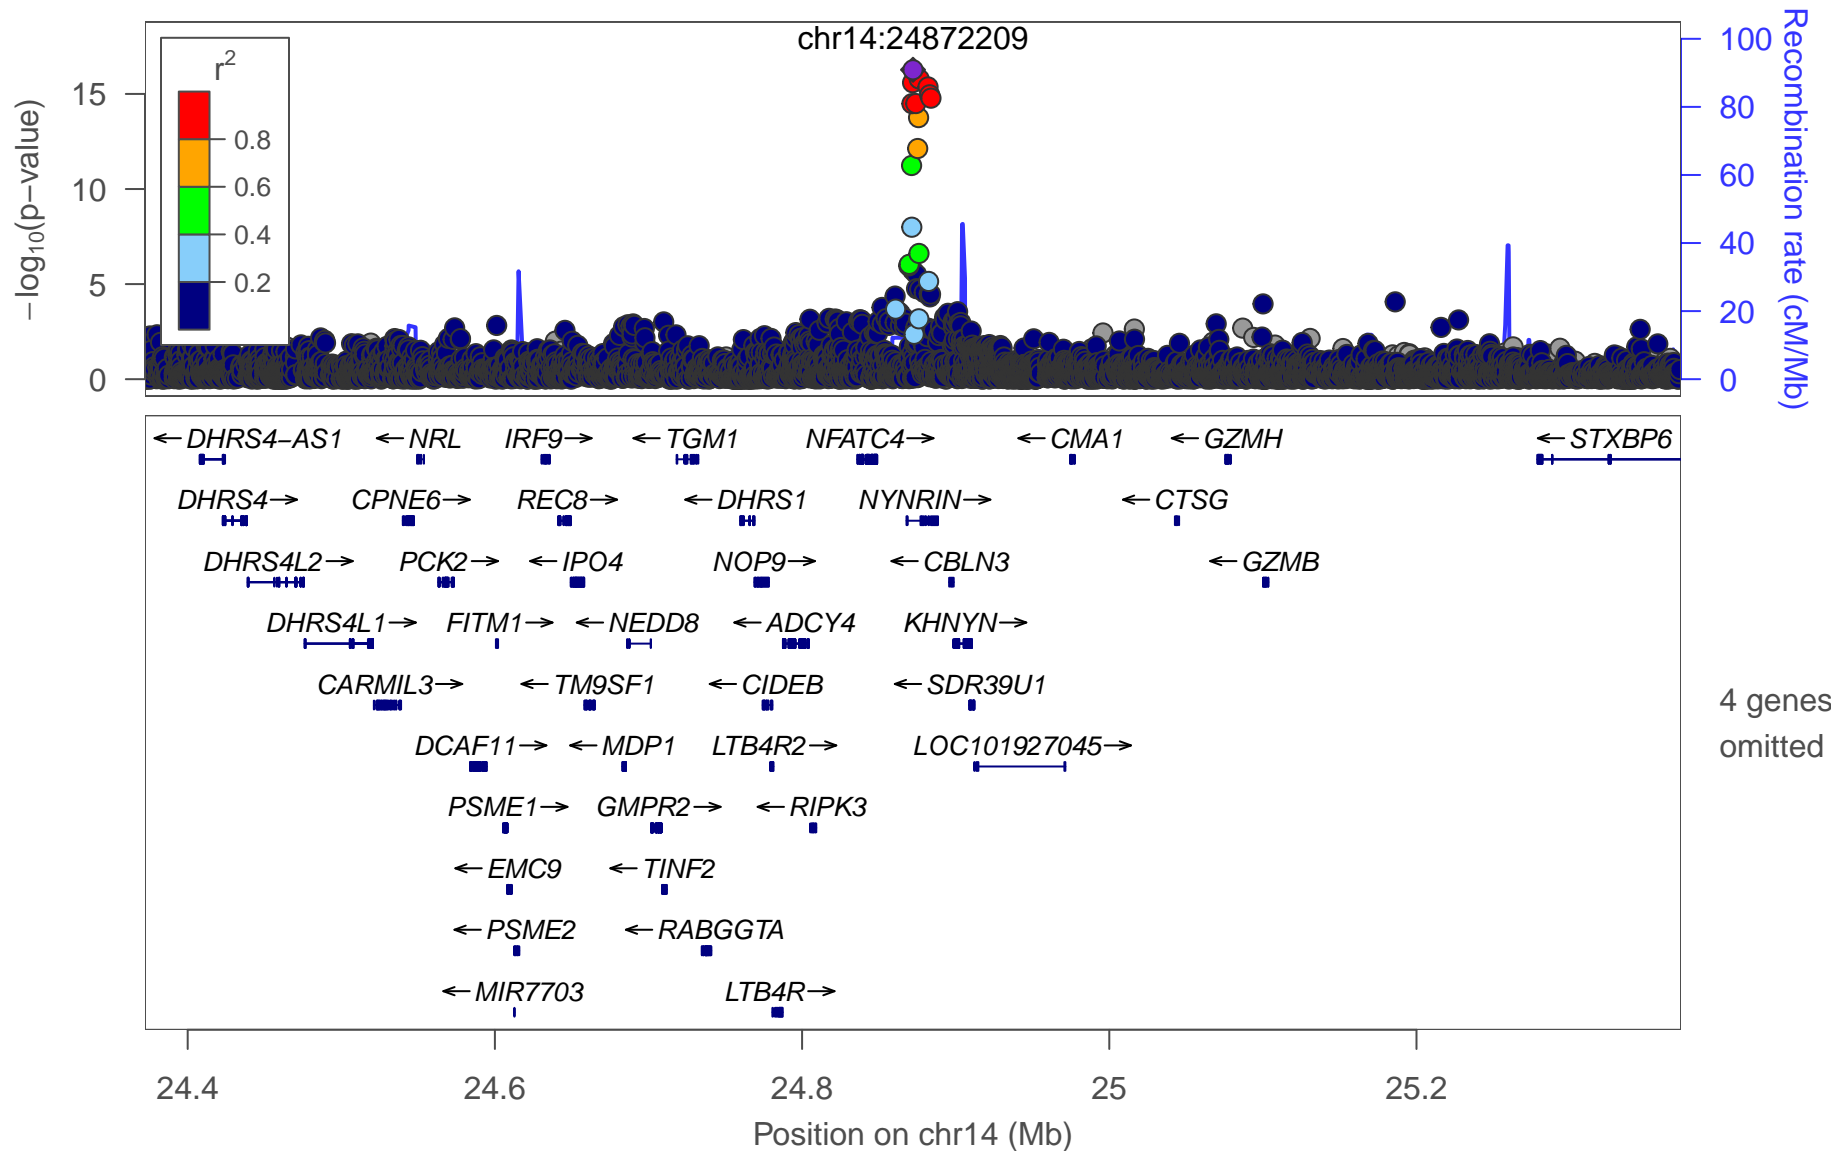

# 14\_3:Phe

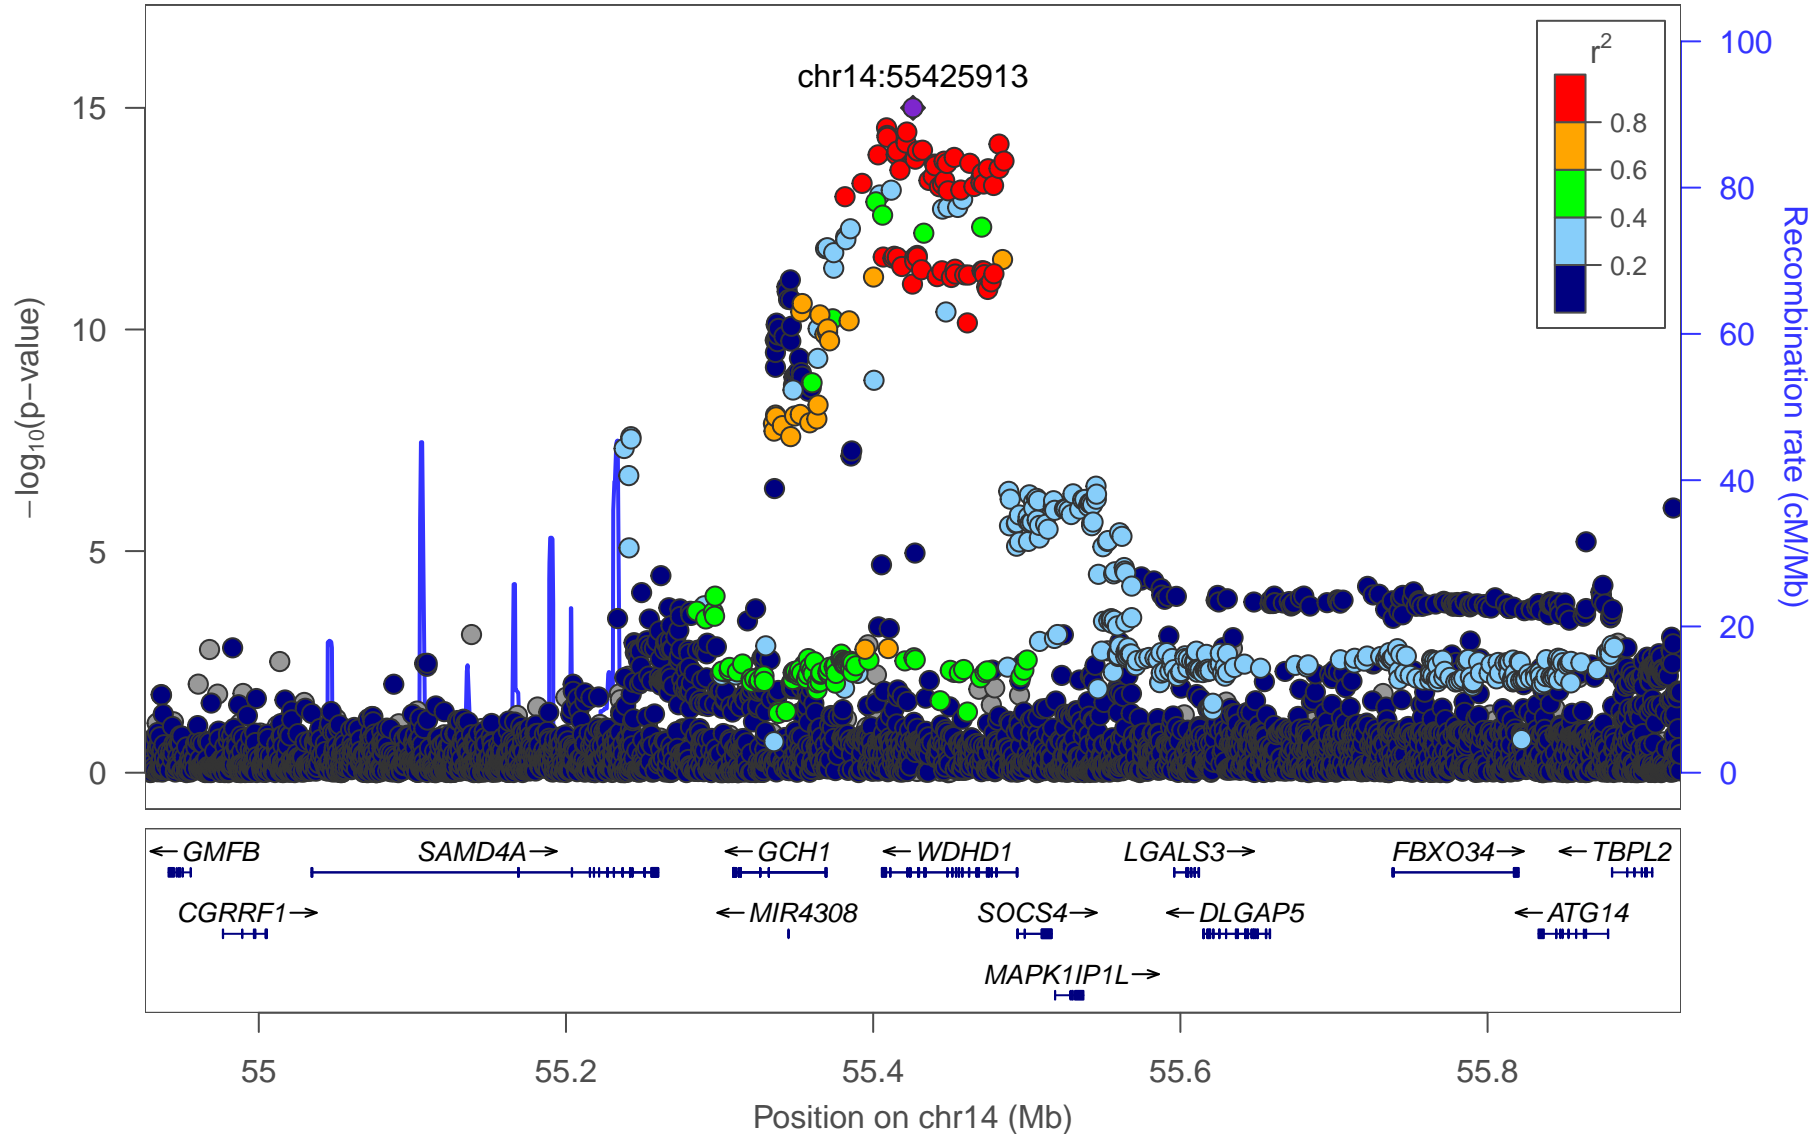

# 14\_4:SM

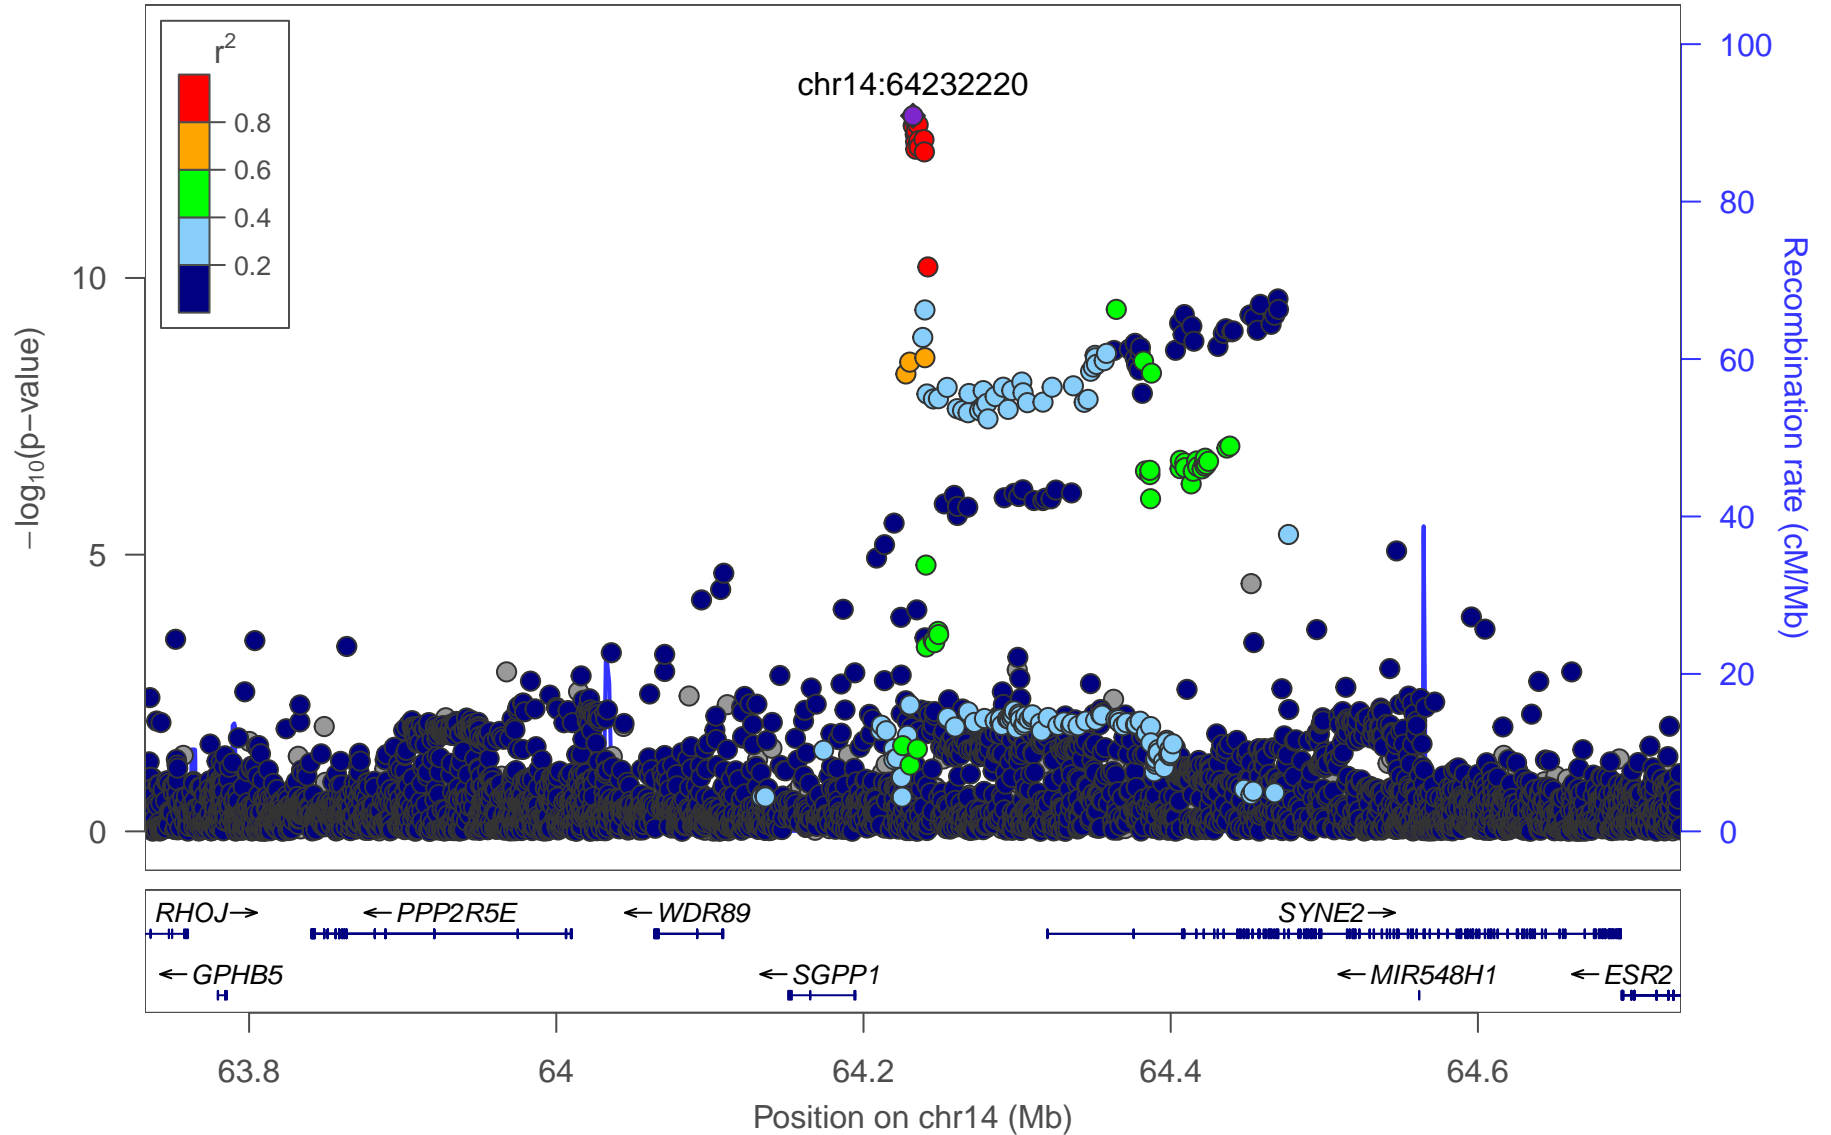



# 14\_5:S-LDL-PL\_percent

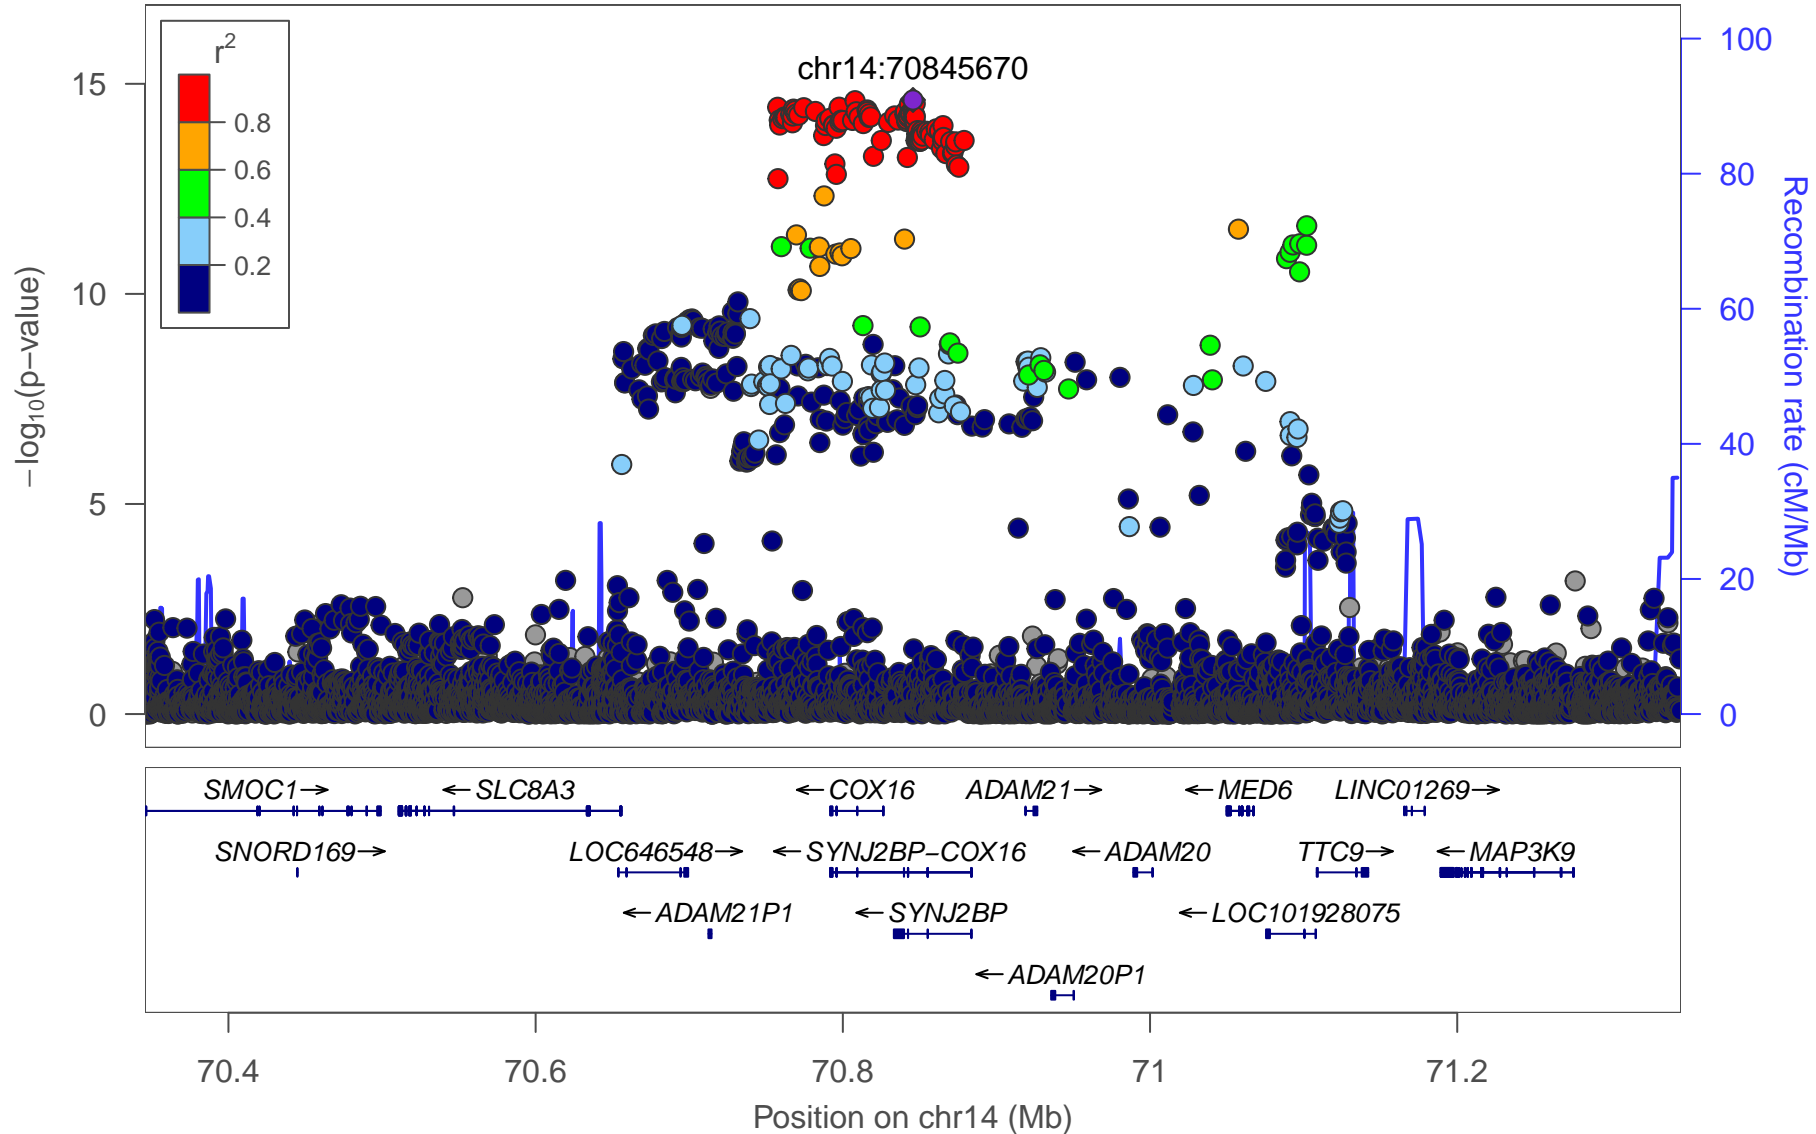

# 14\_6:Ala

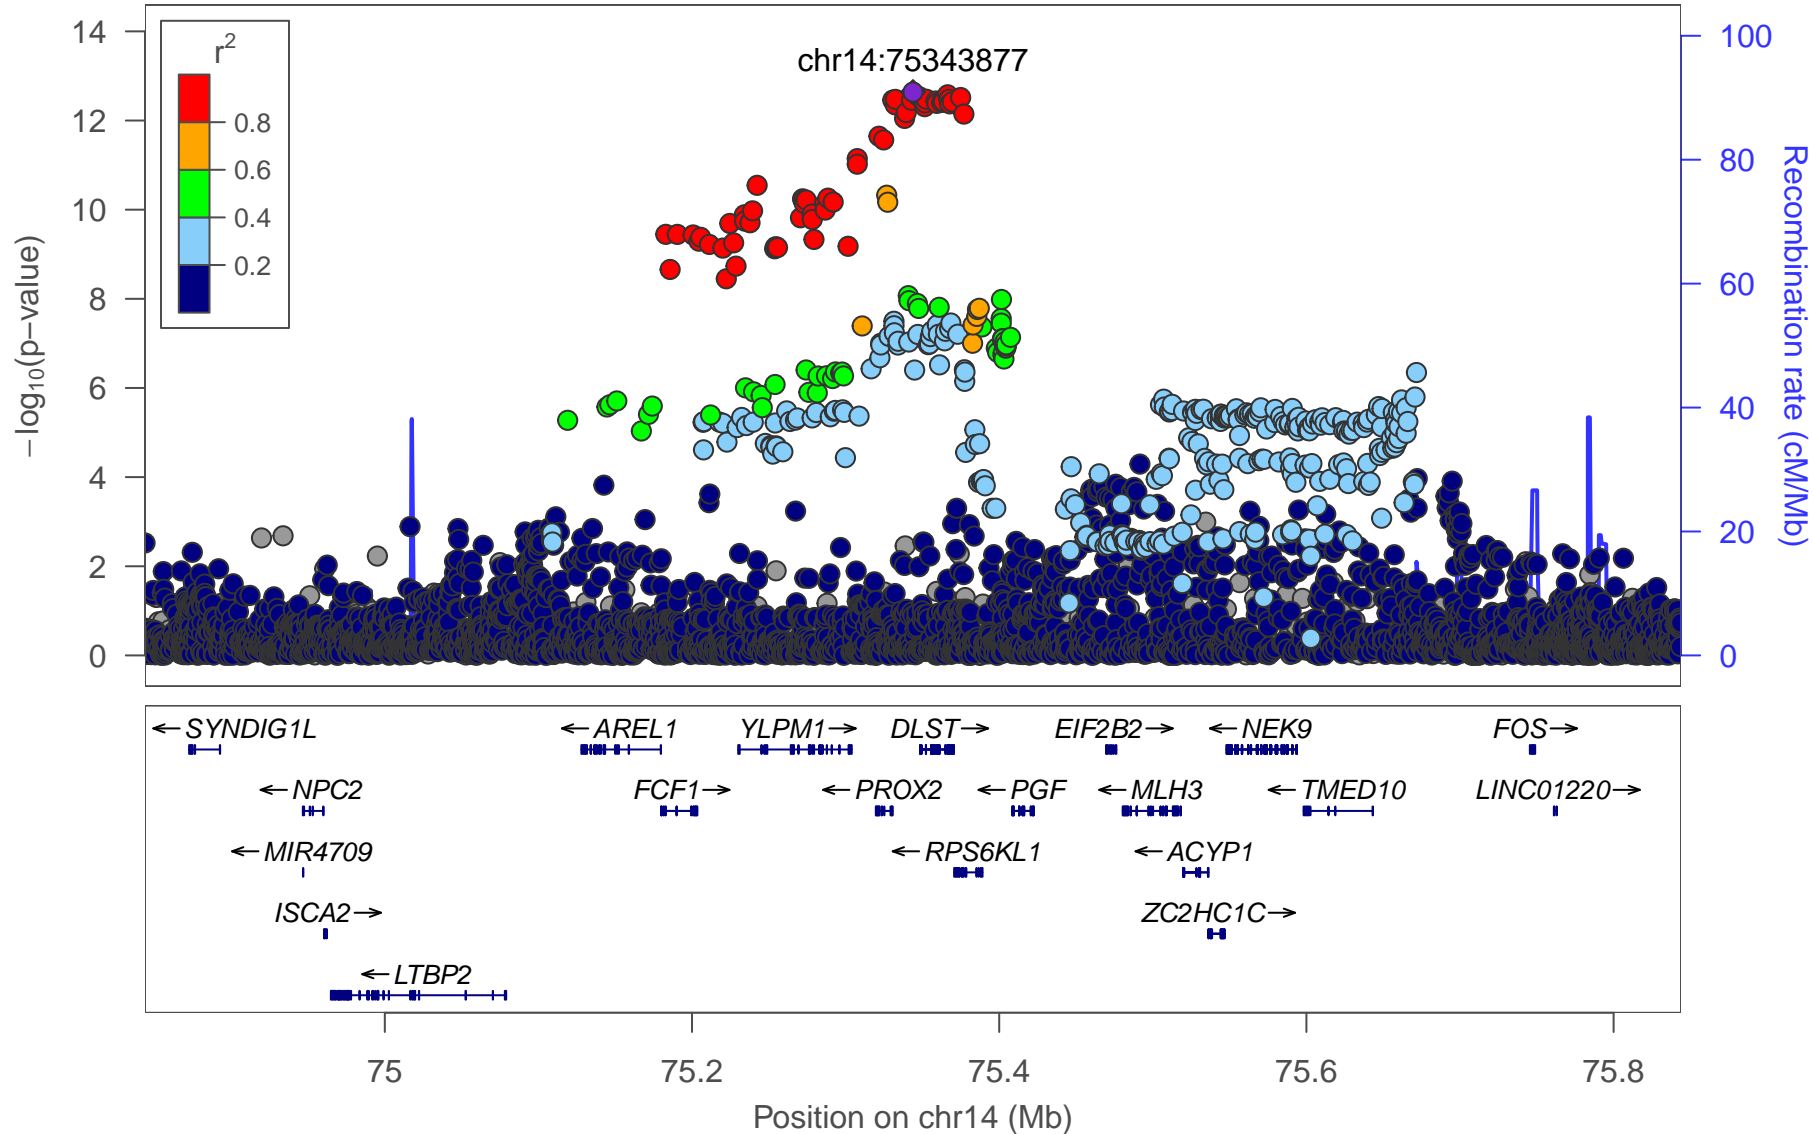

# 14\_7:GlycA

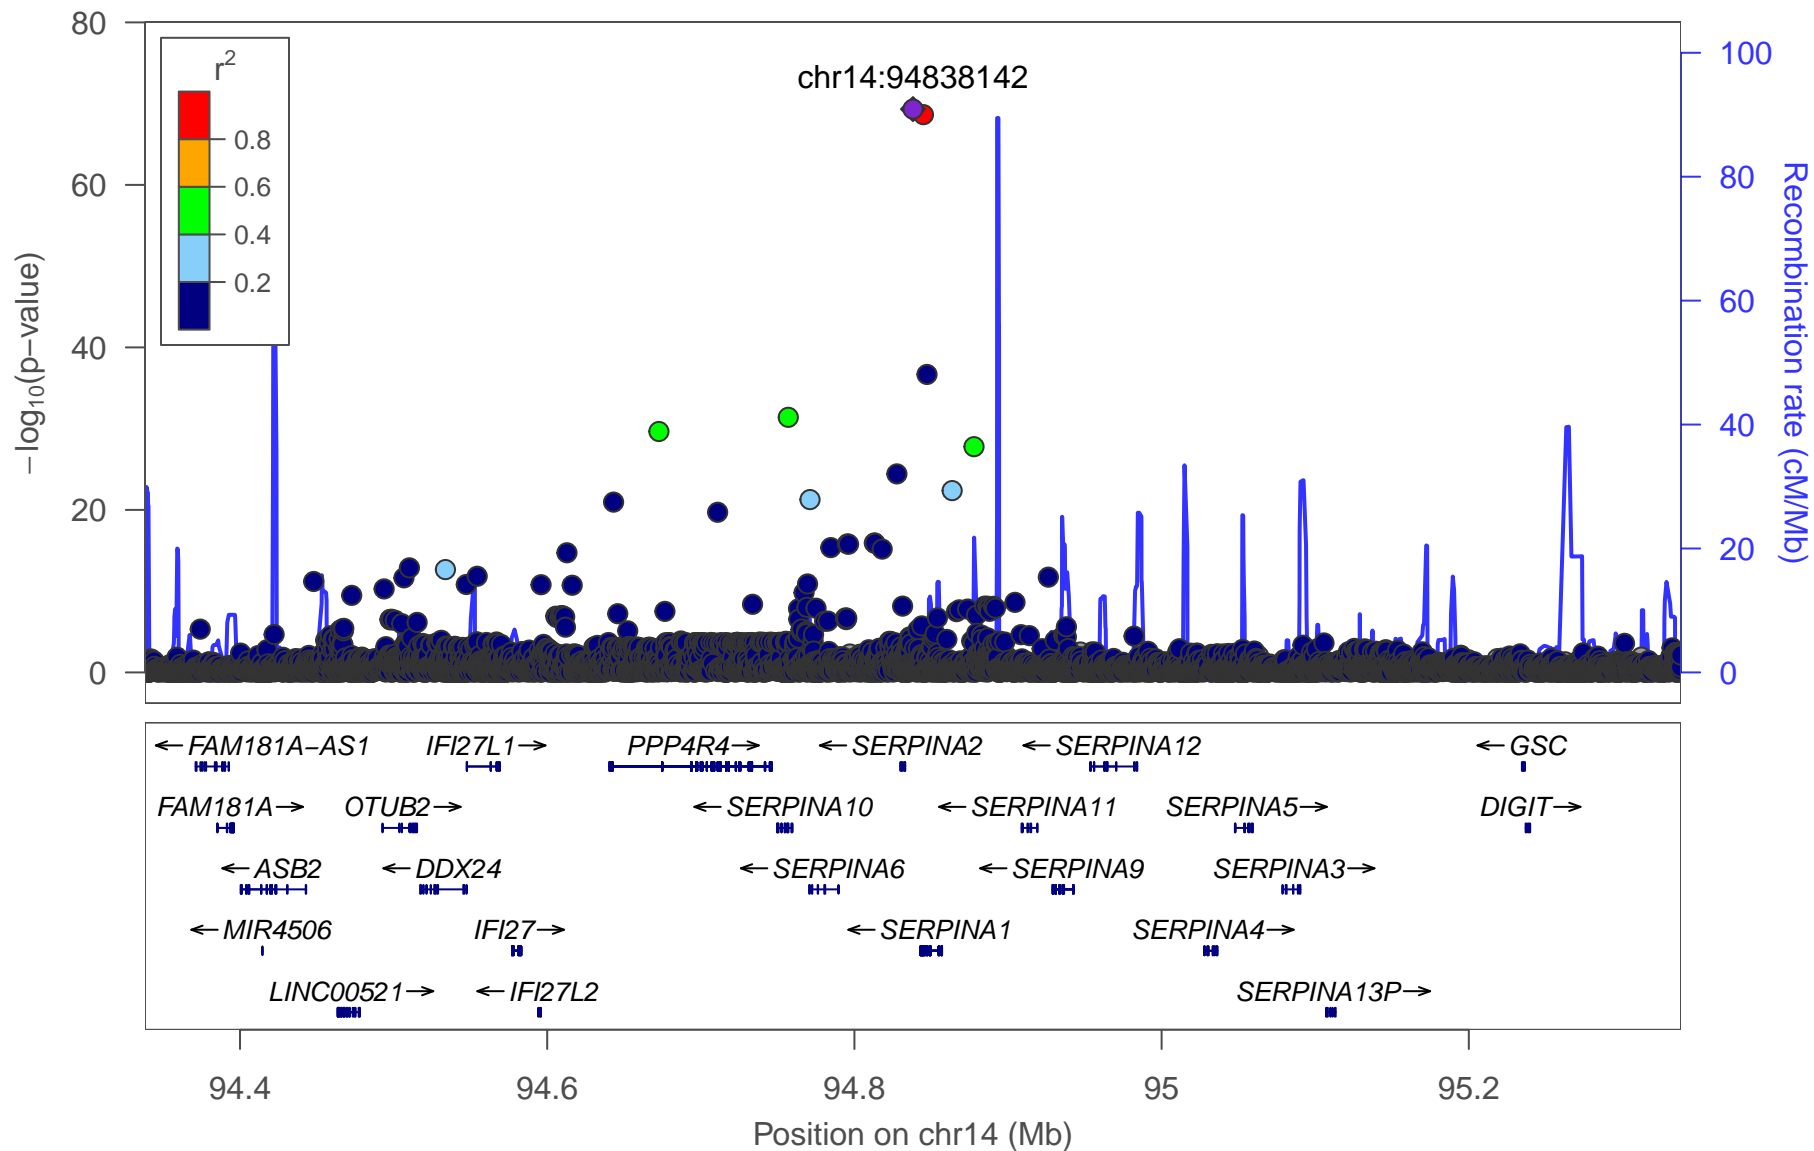

# 14\_8:Gln

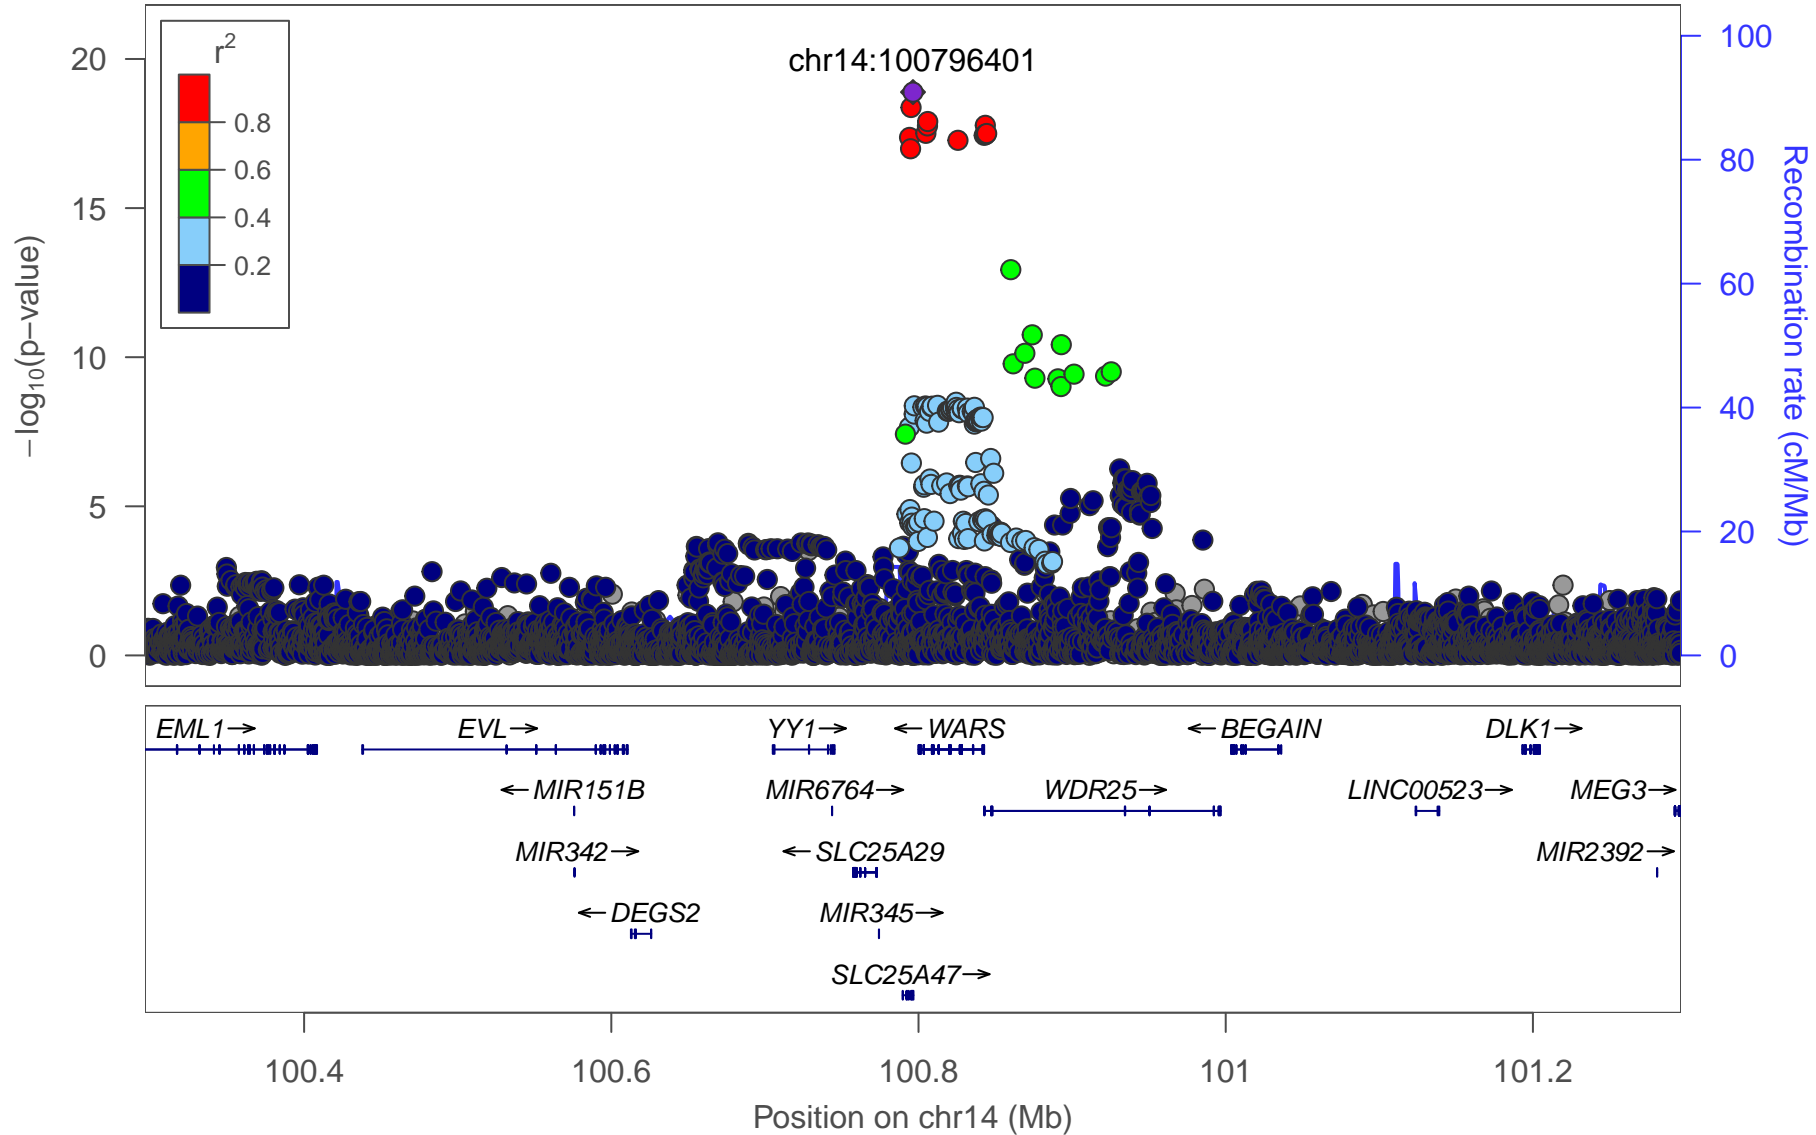

# 14\_9:XL-HDL-C

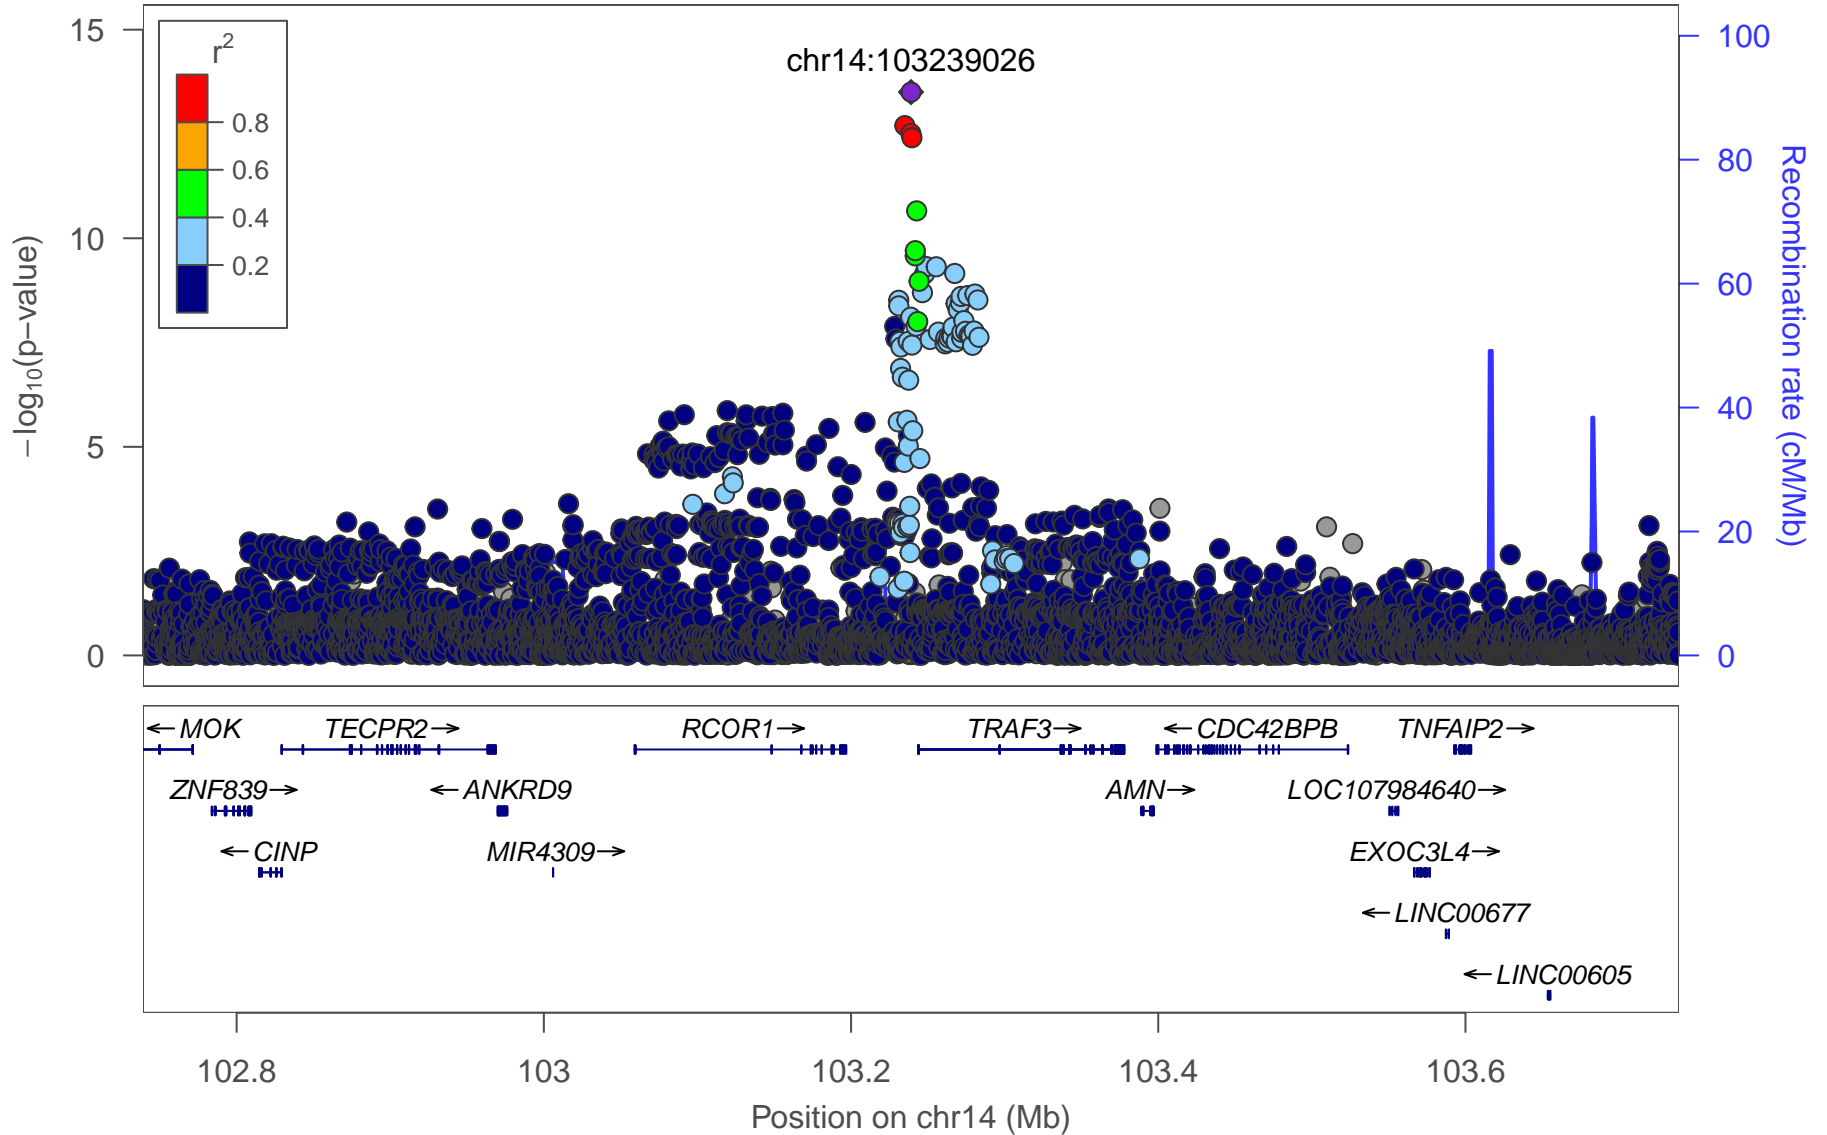

# 14\_10:LDL-D

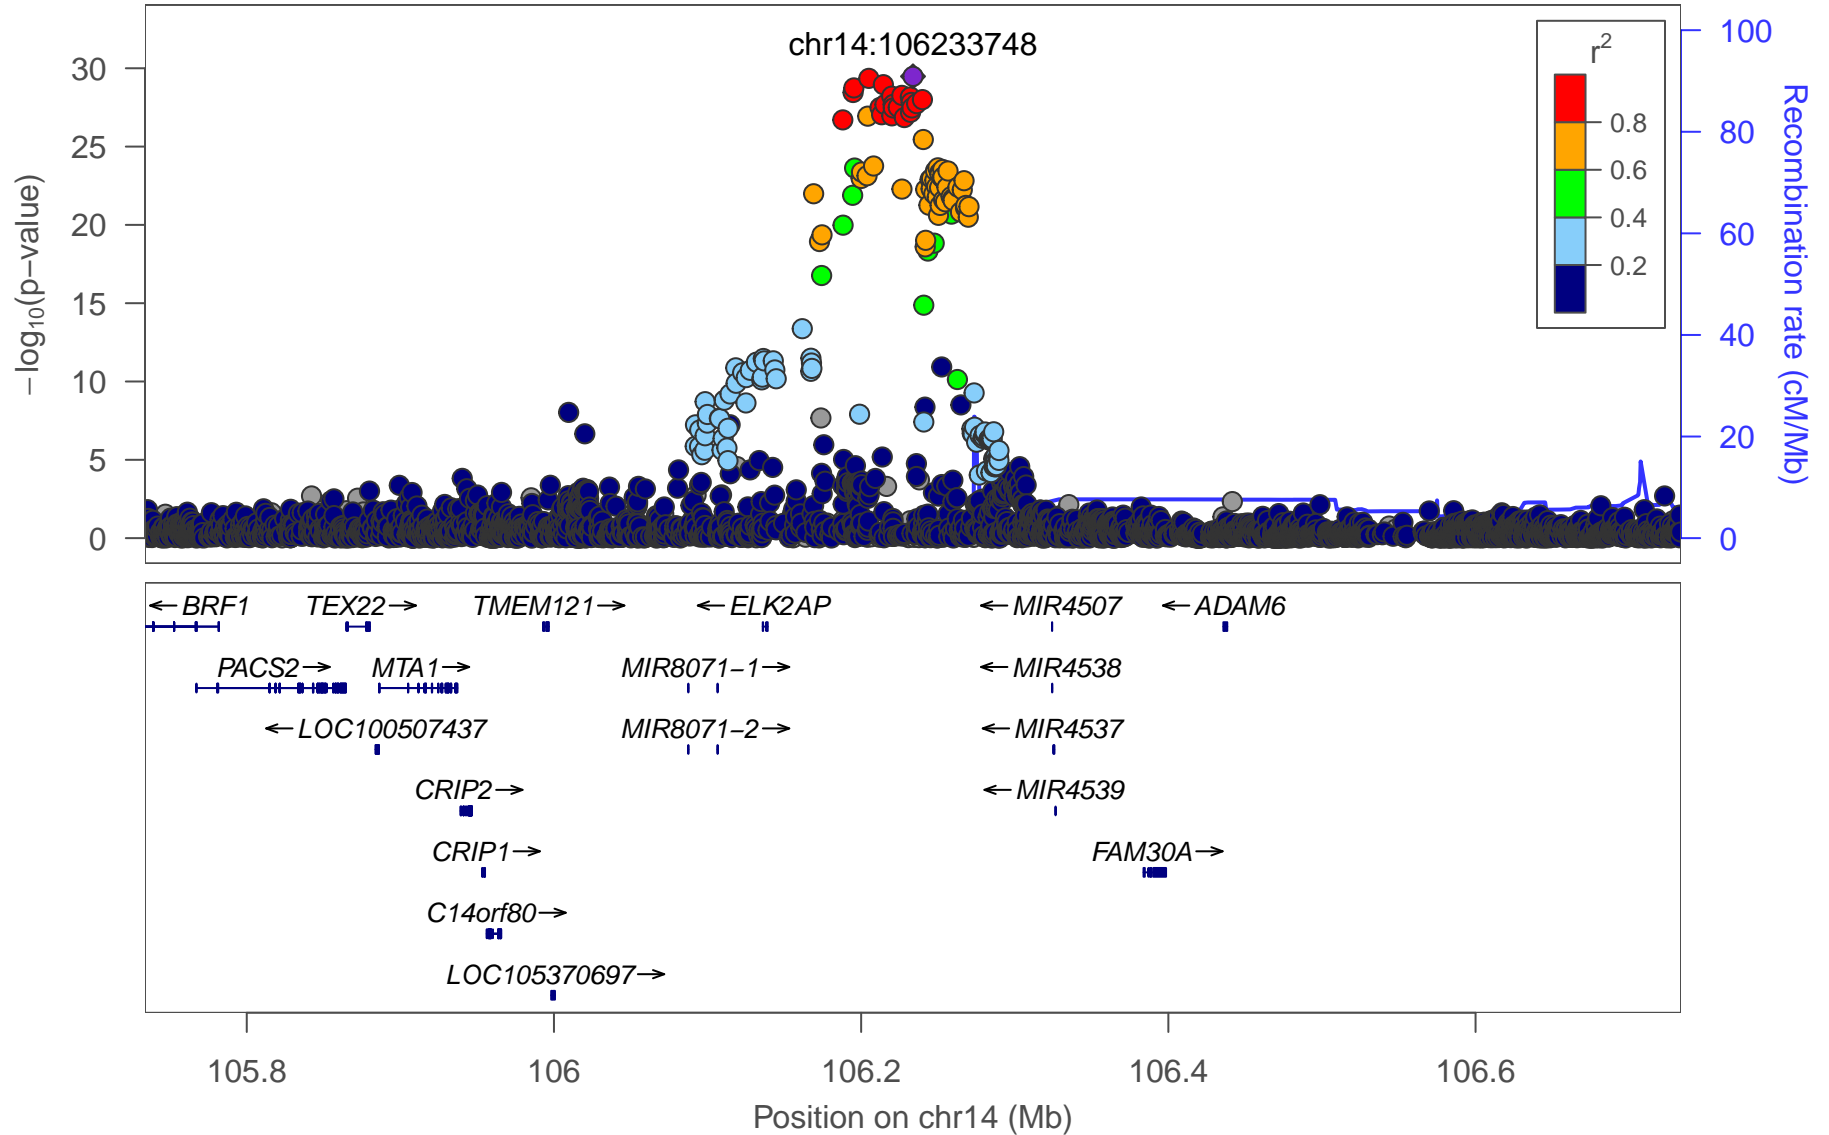

# 15\_1:Crea

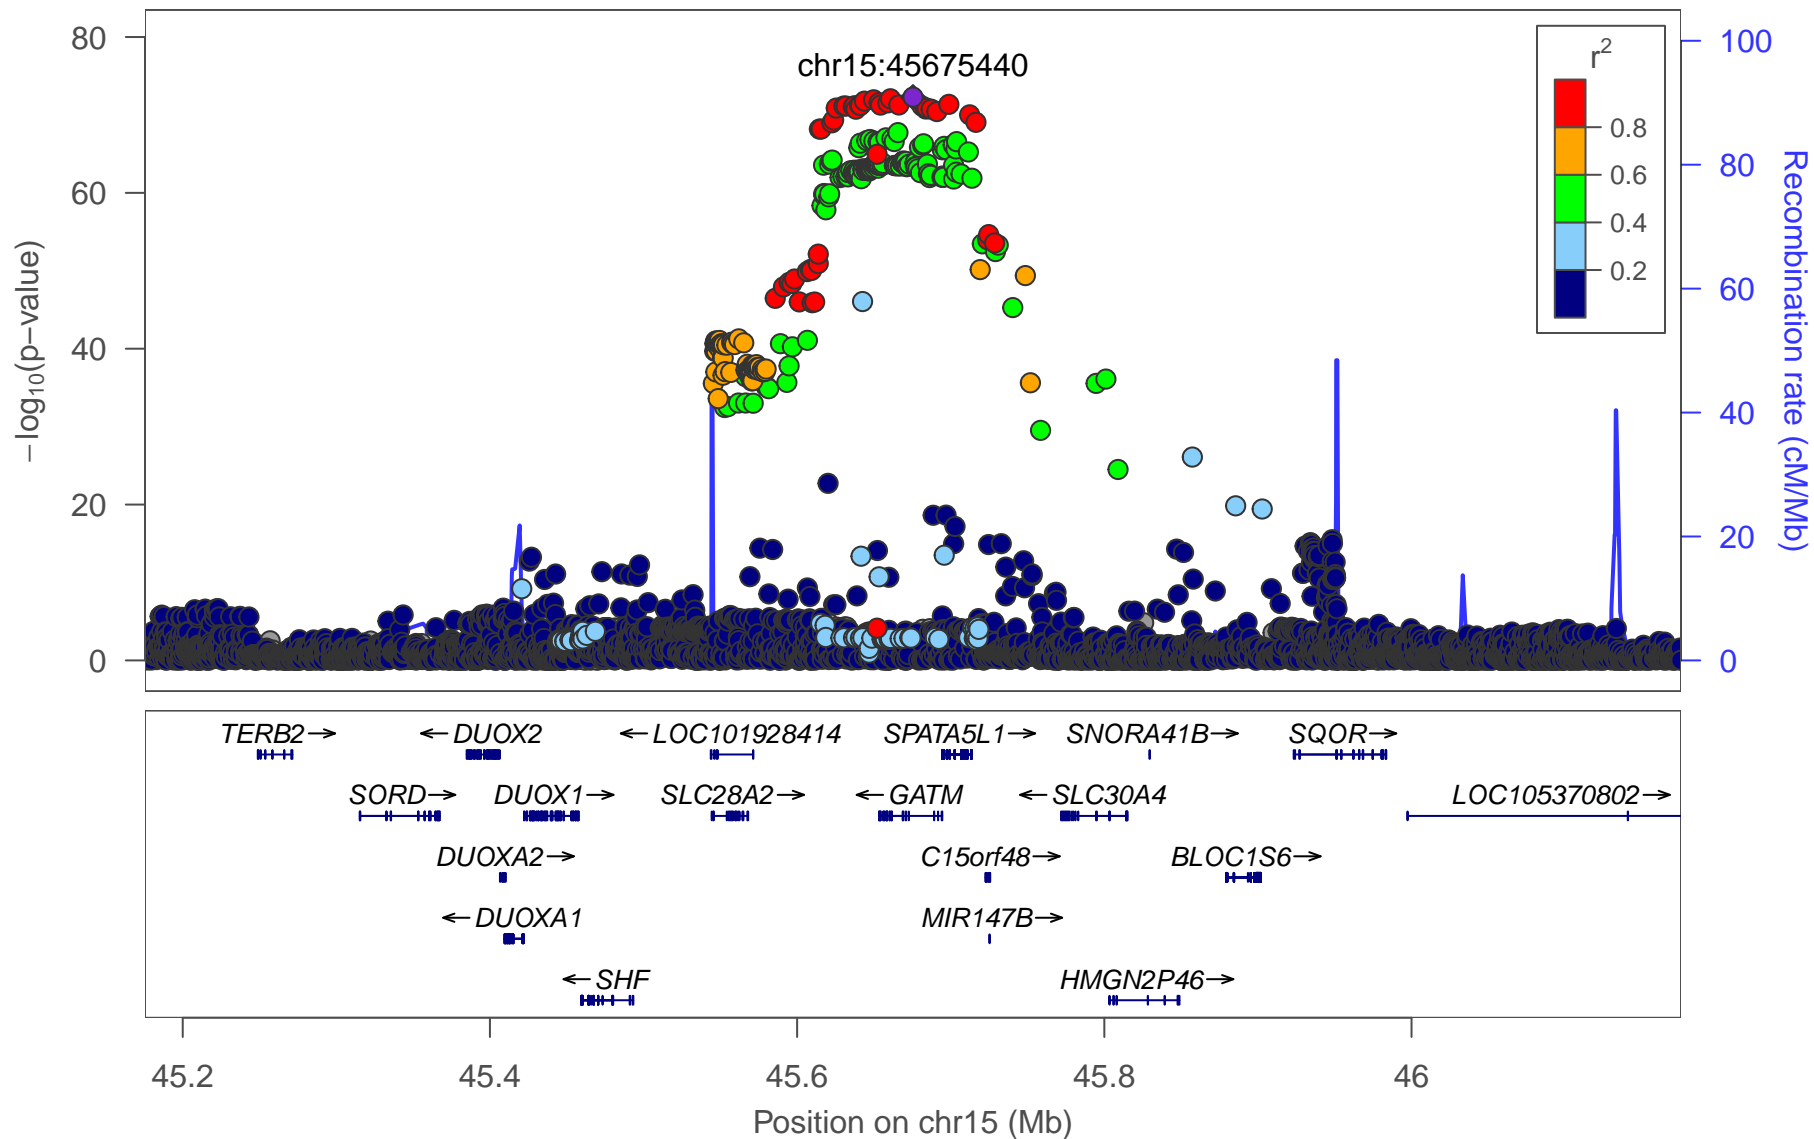

# 15\_2:L-HDL-TG

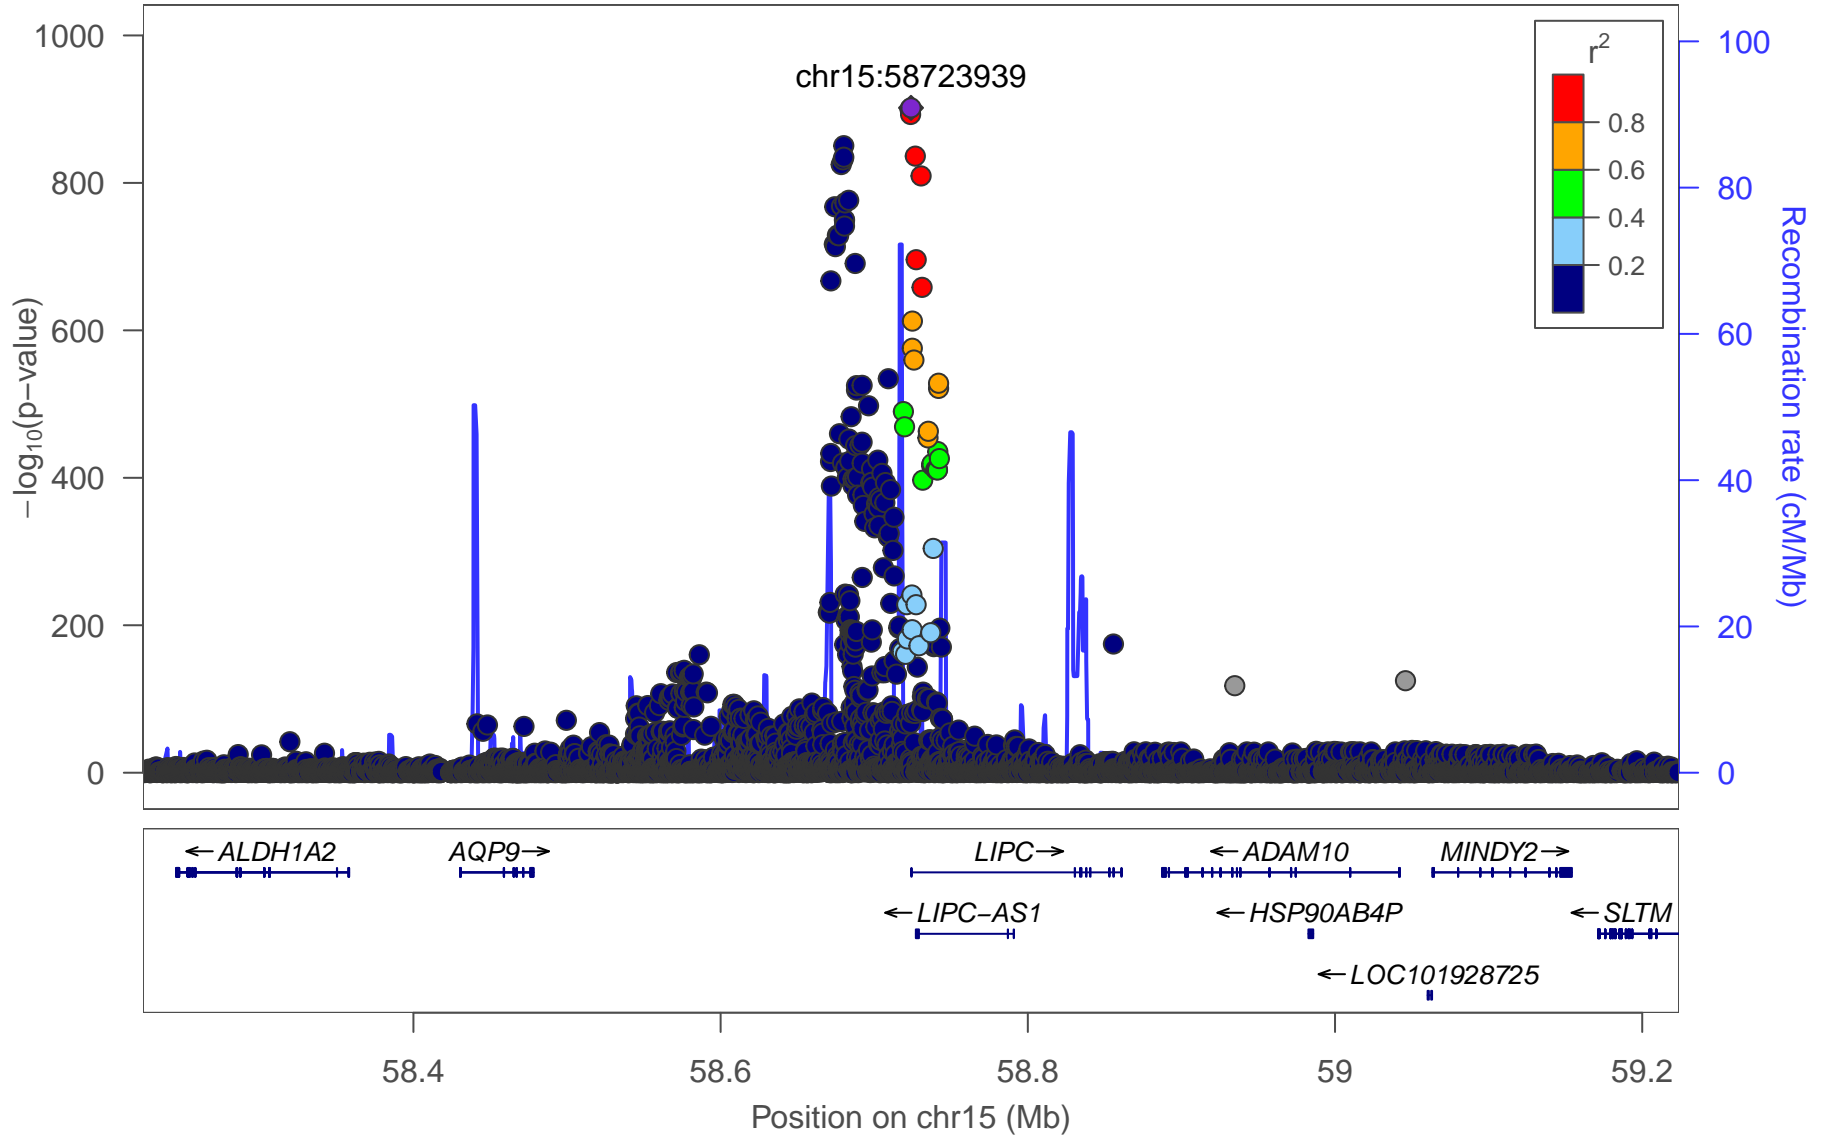



# 15\_3:Crea

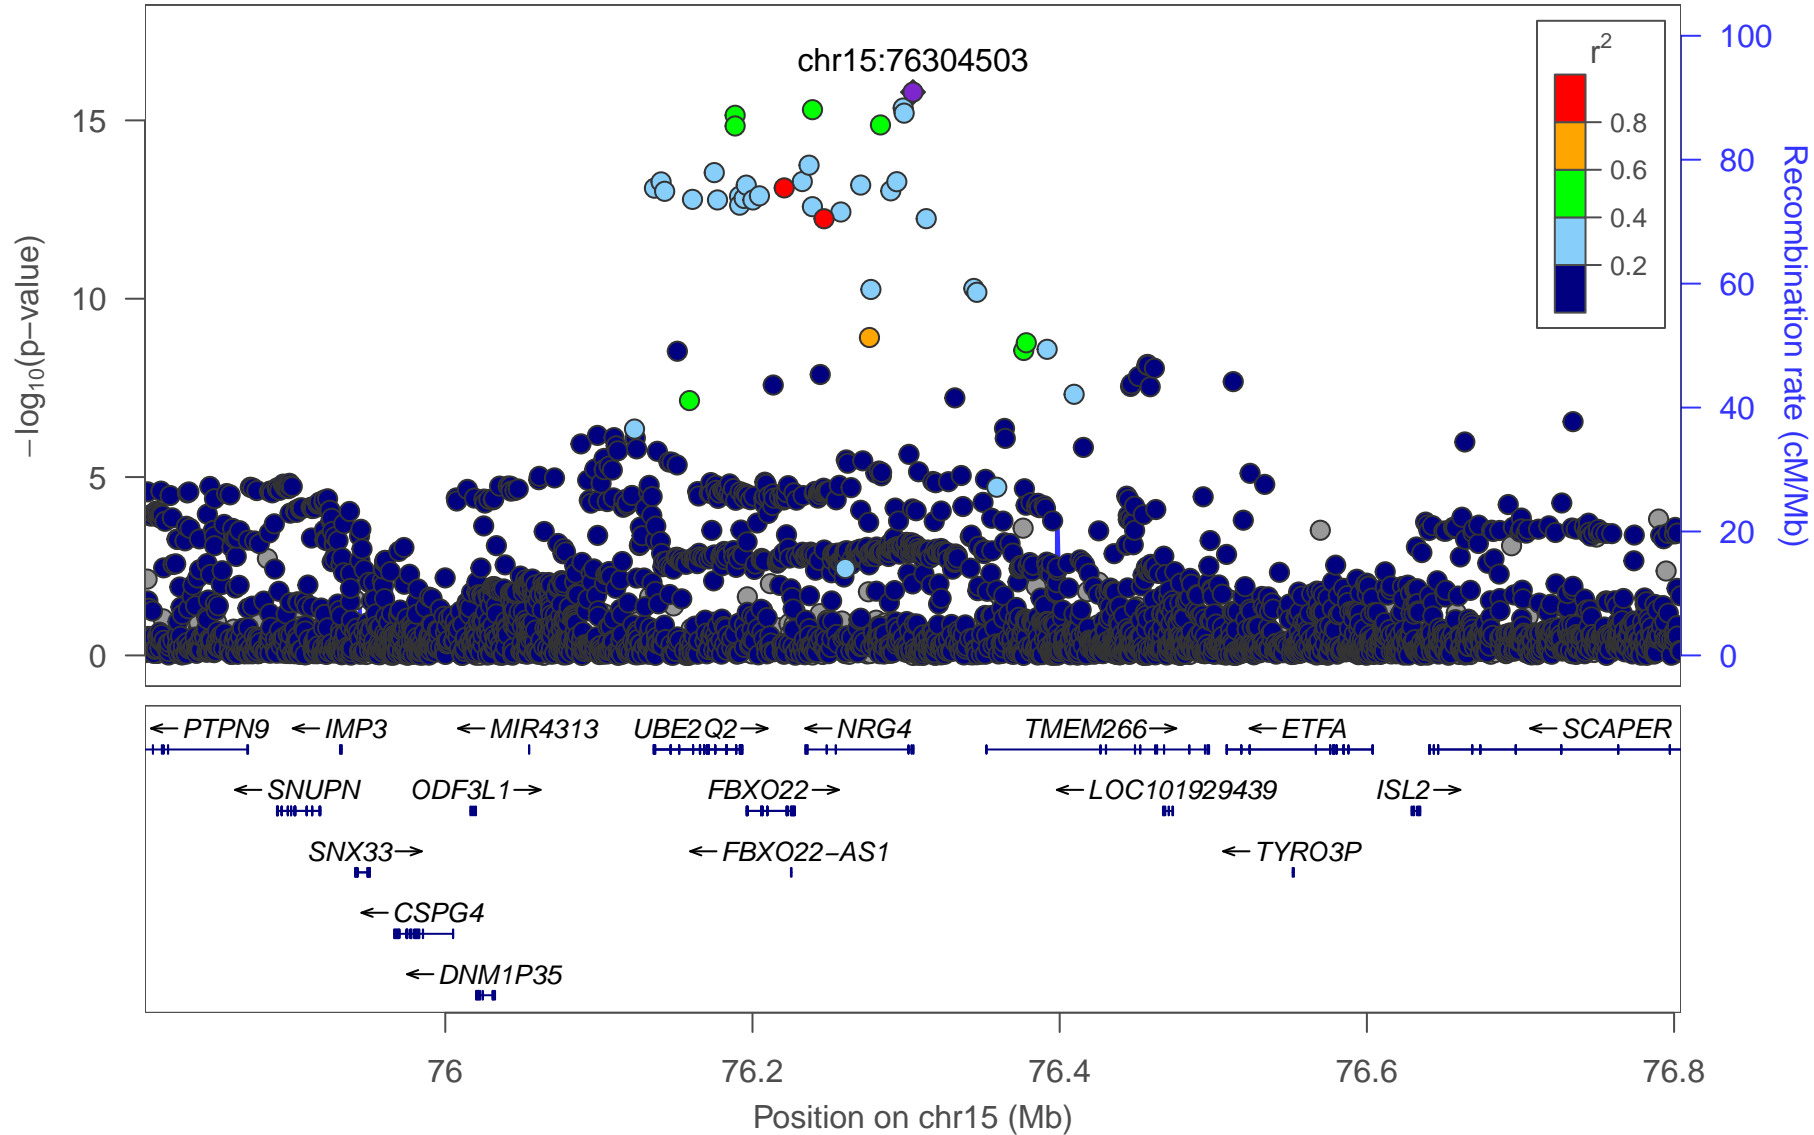

# 15\_4:S-HDL-PL\_percent

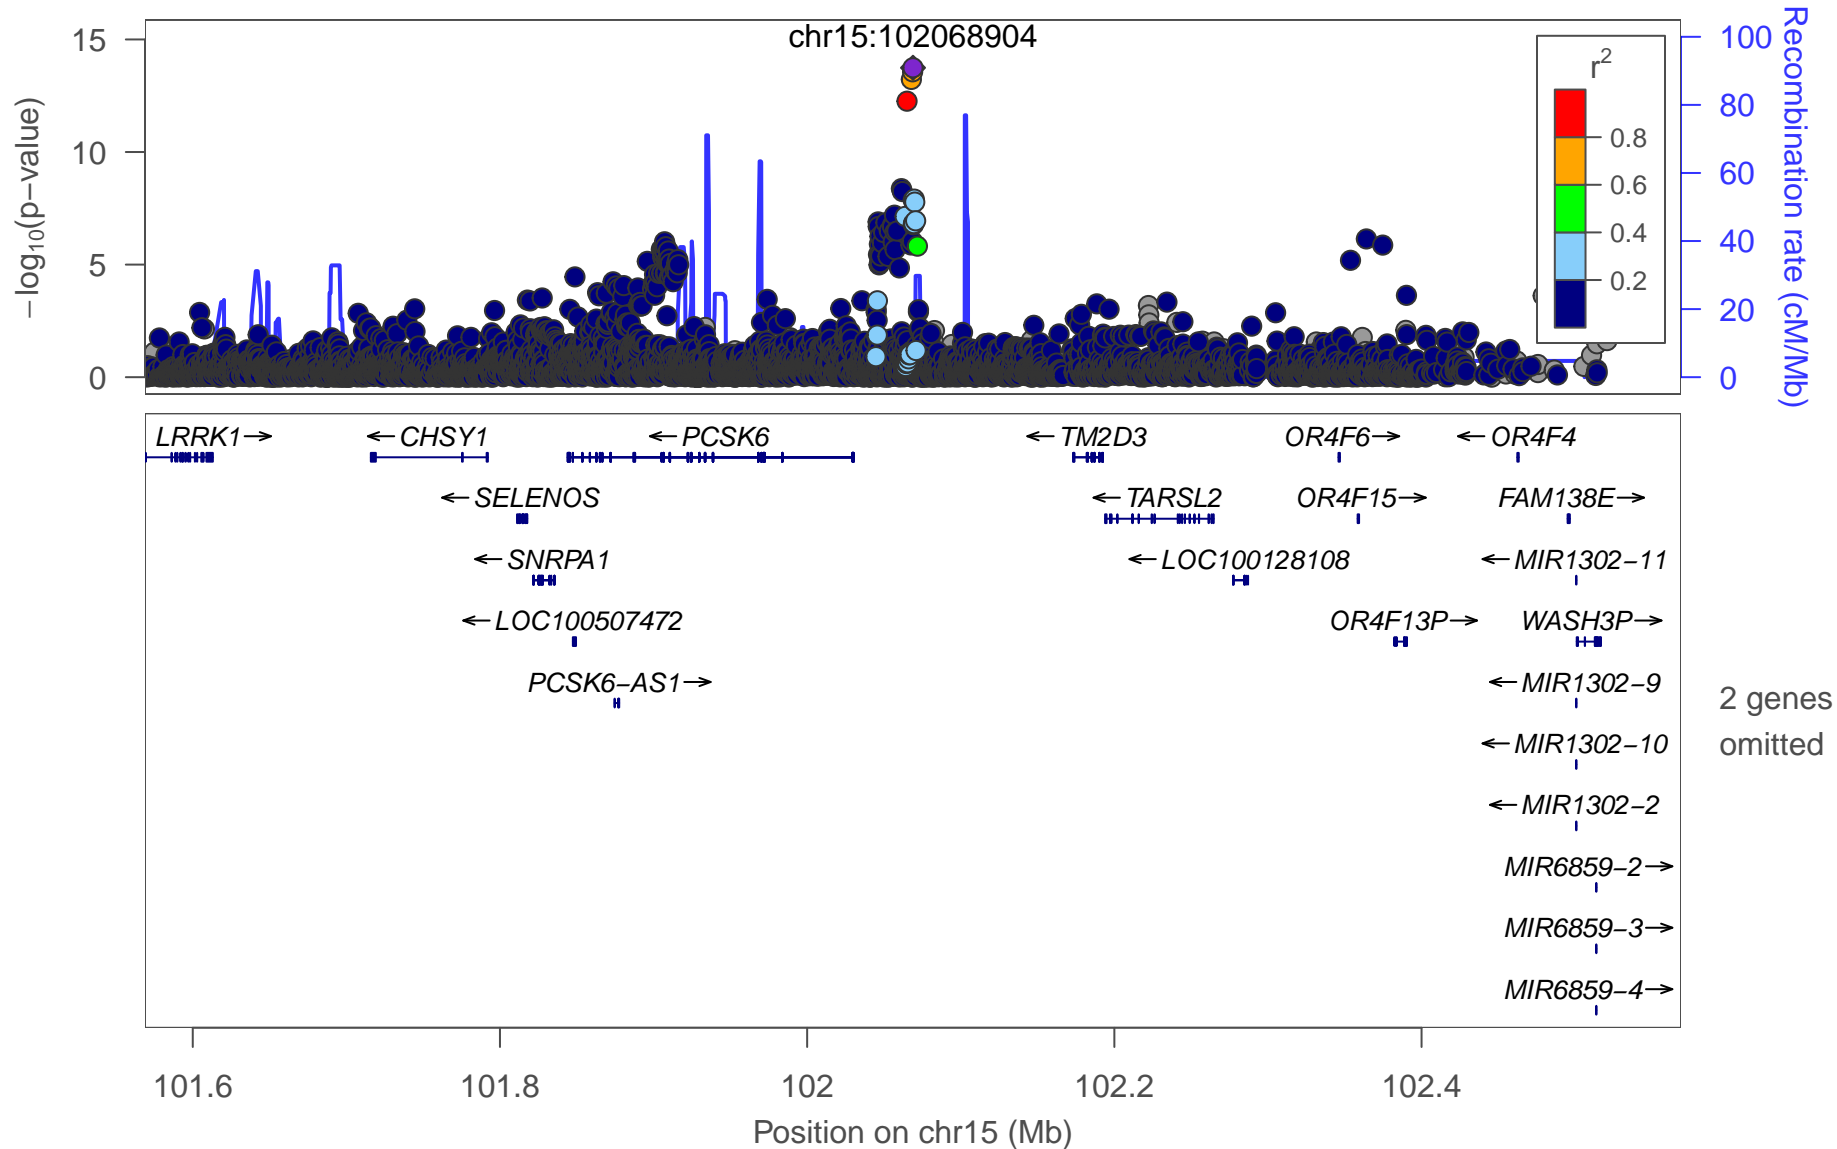

# 16\_1:XL-HDL-CE

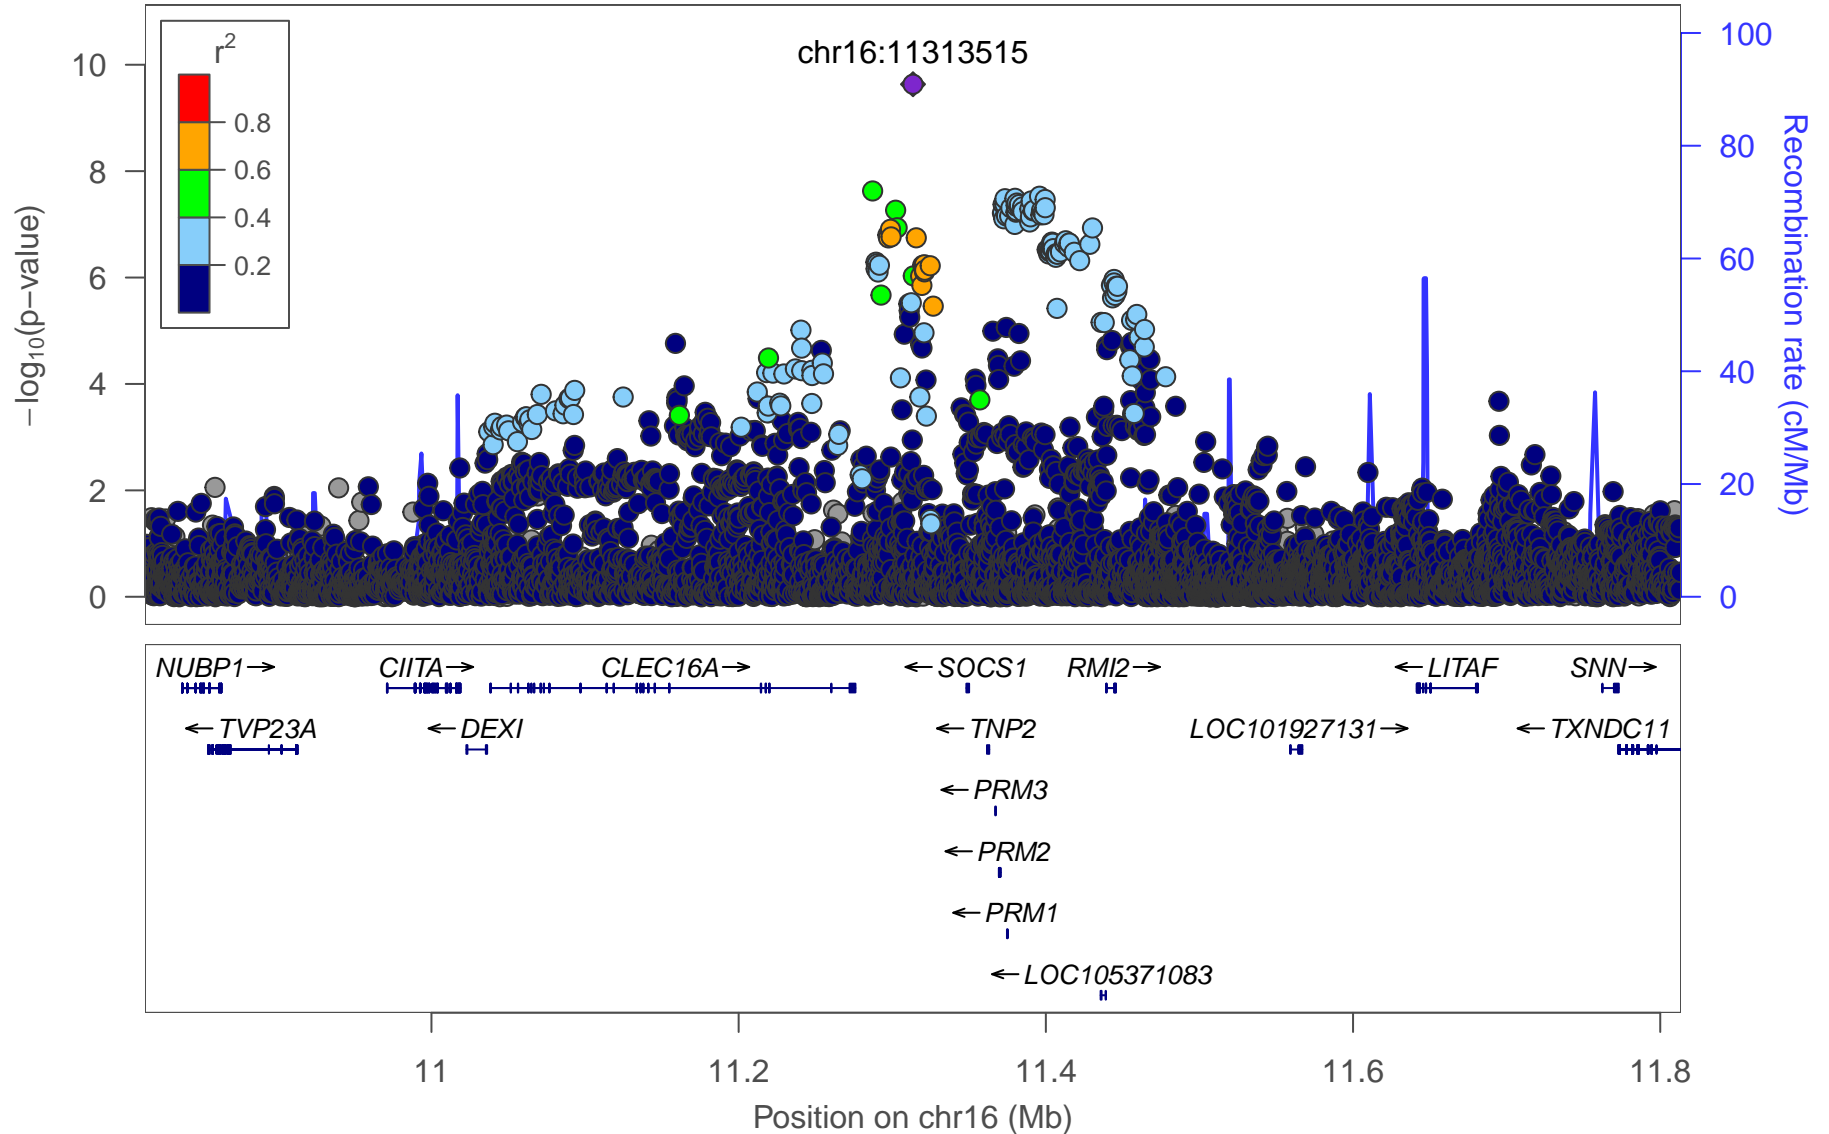

# 16\_2:UnsatDeg

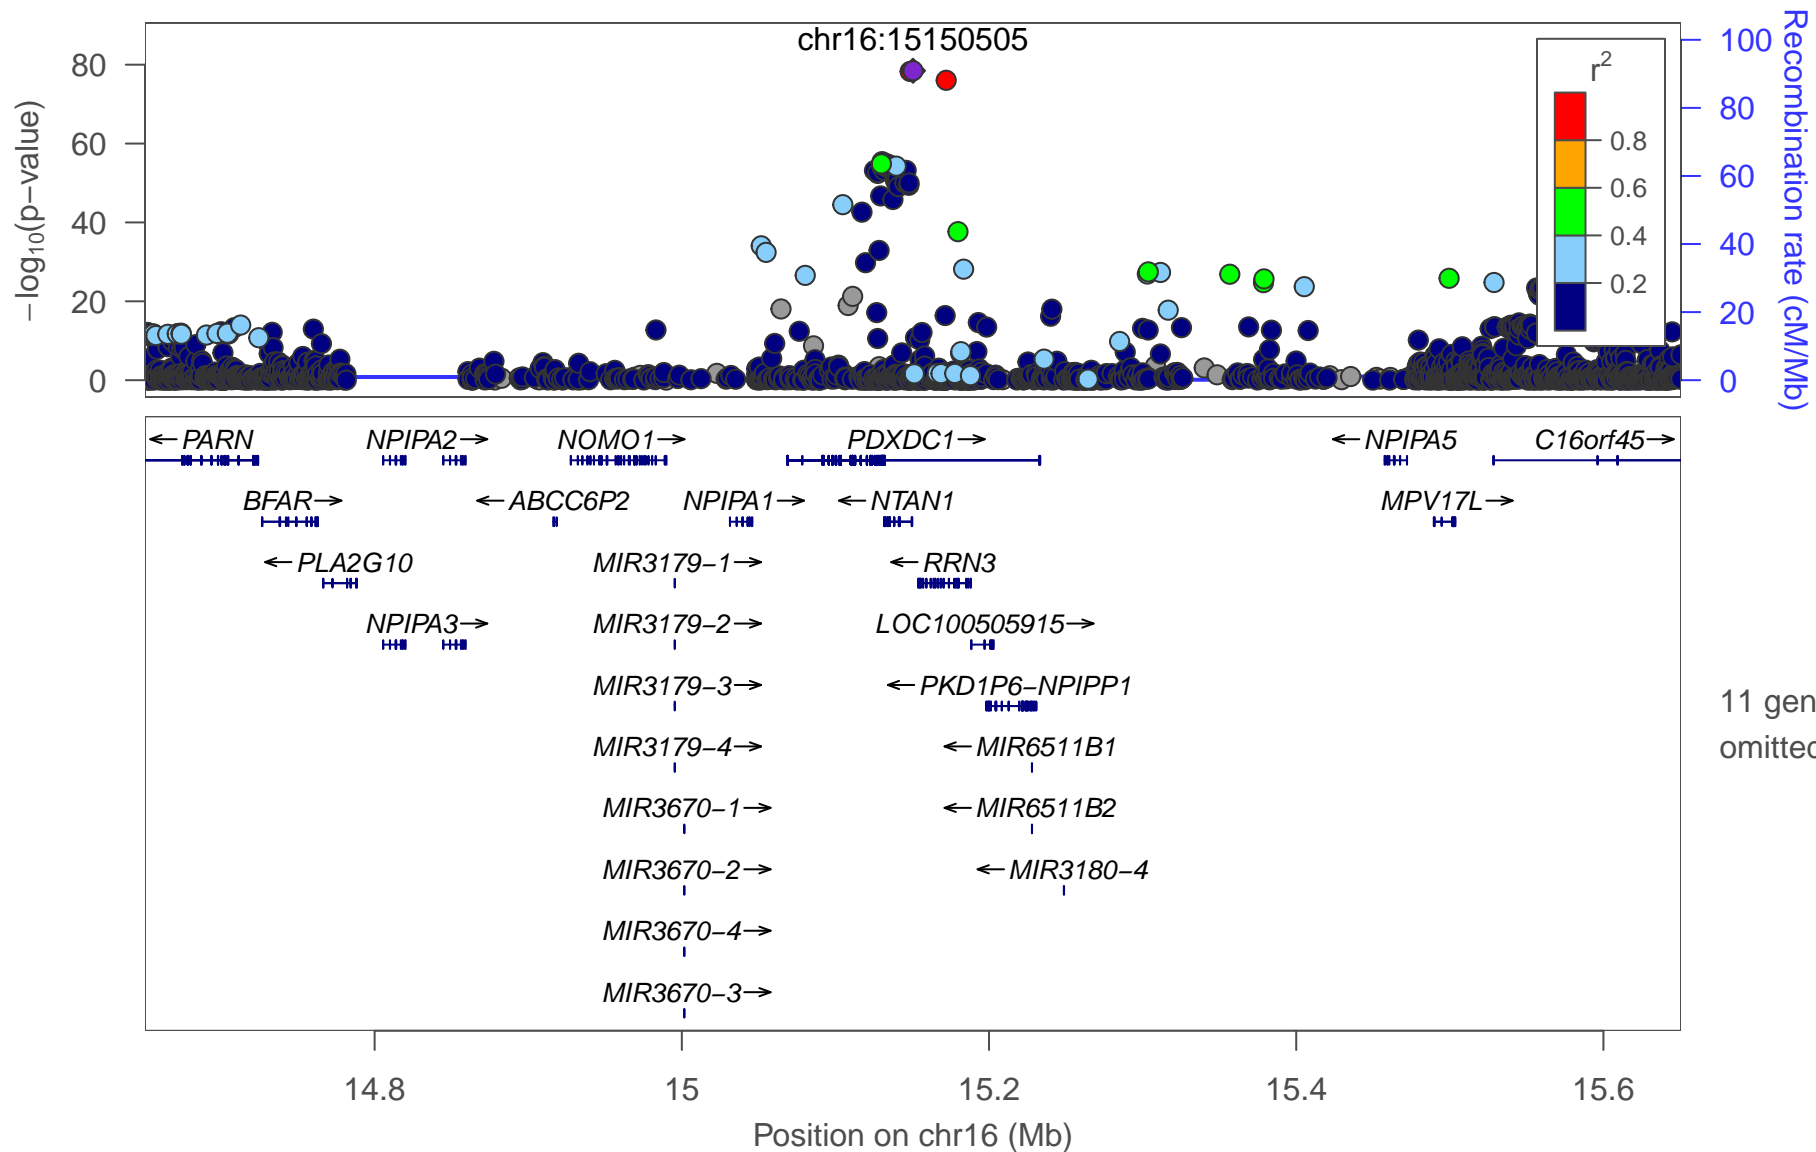

# 16\_3:Crea

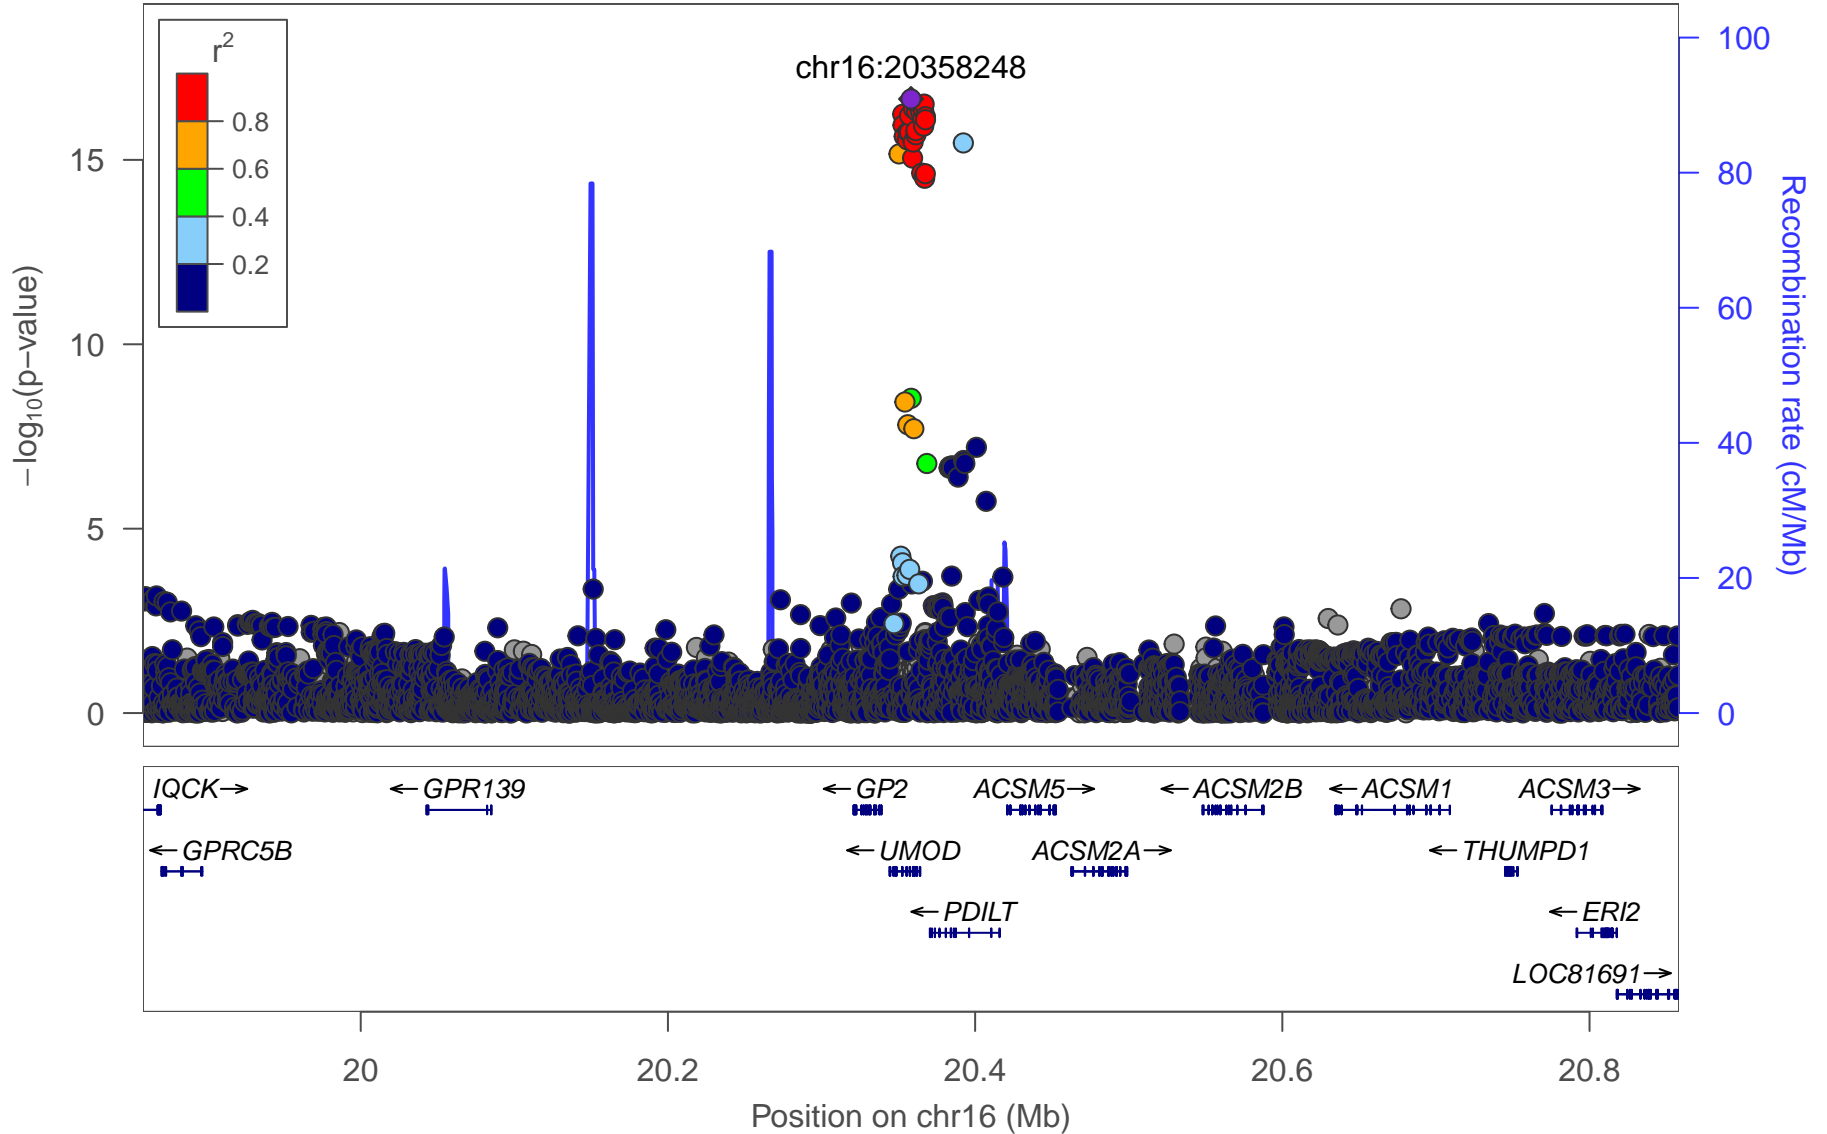

# 16\_4:S-VLDL-PL\_percent

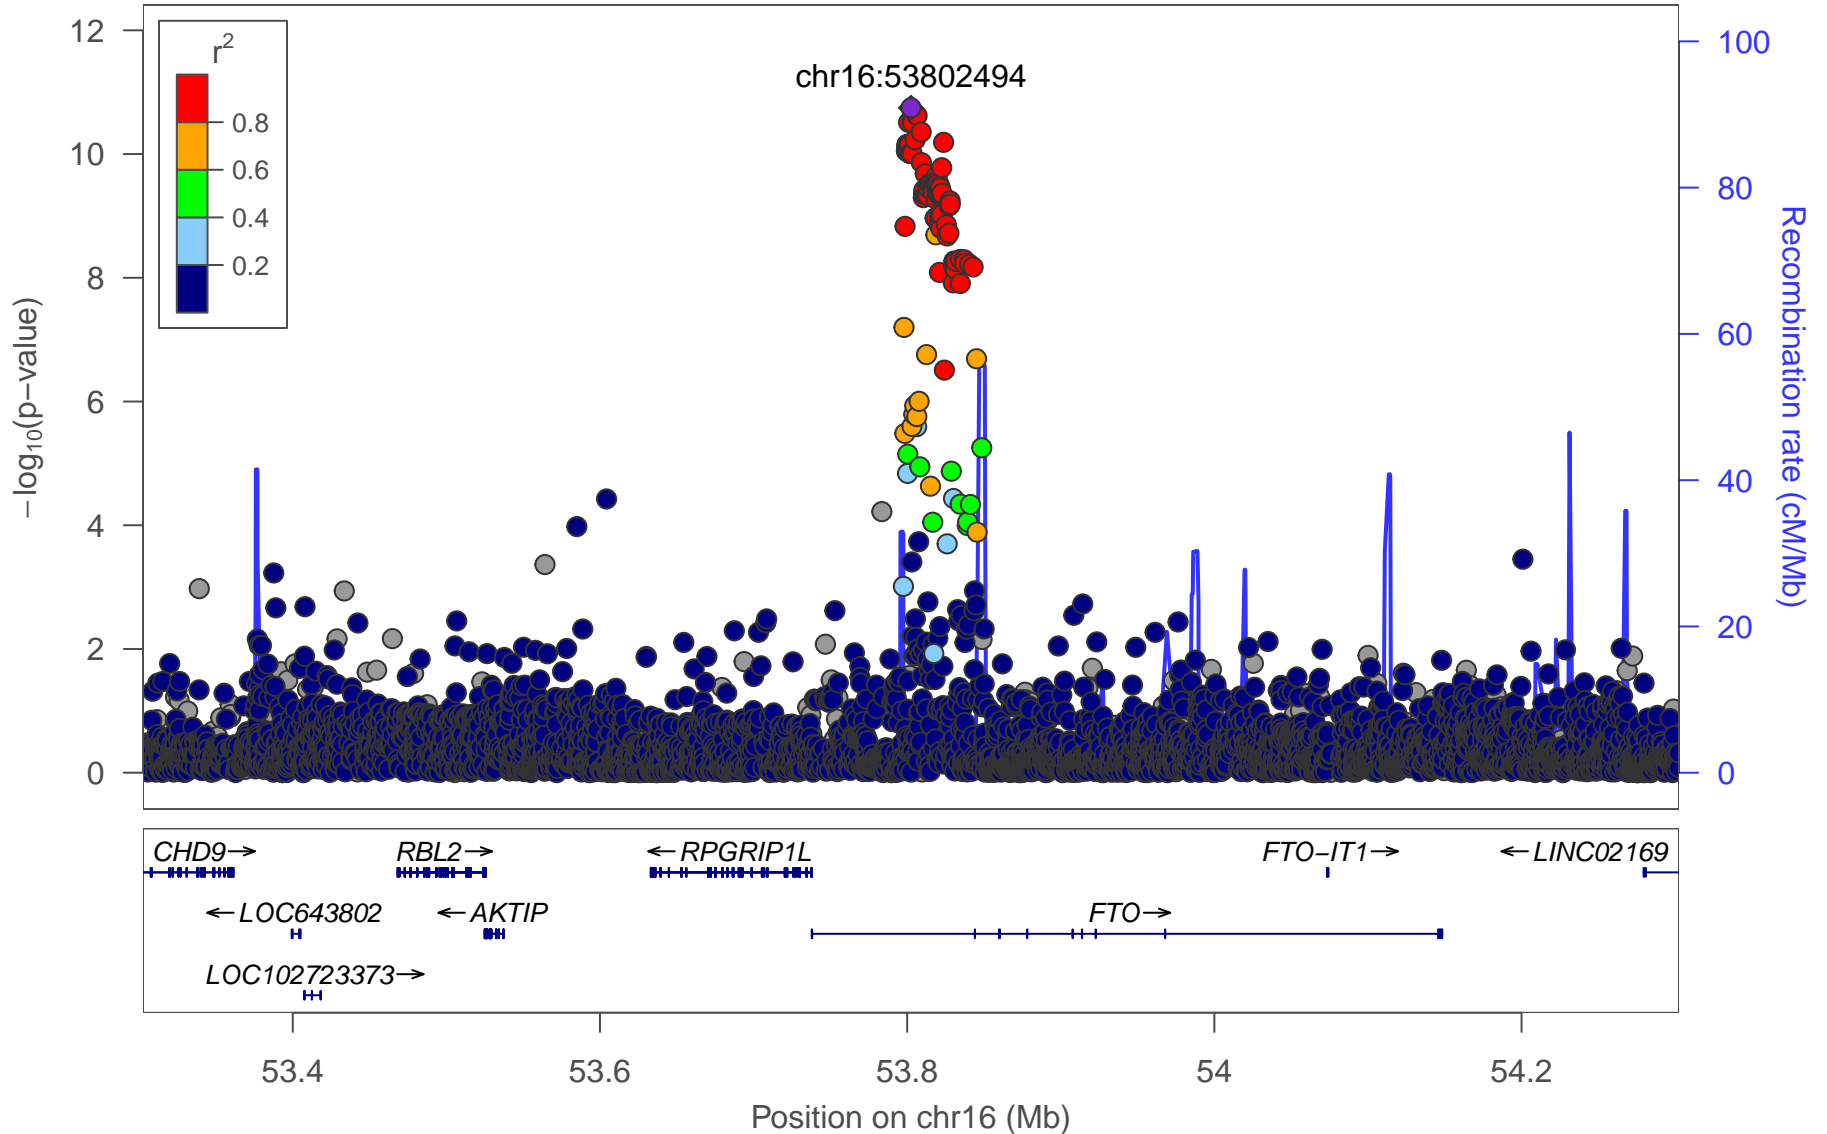

# 16\_5:HDL-C

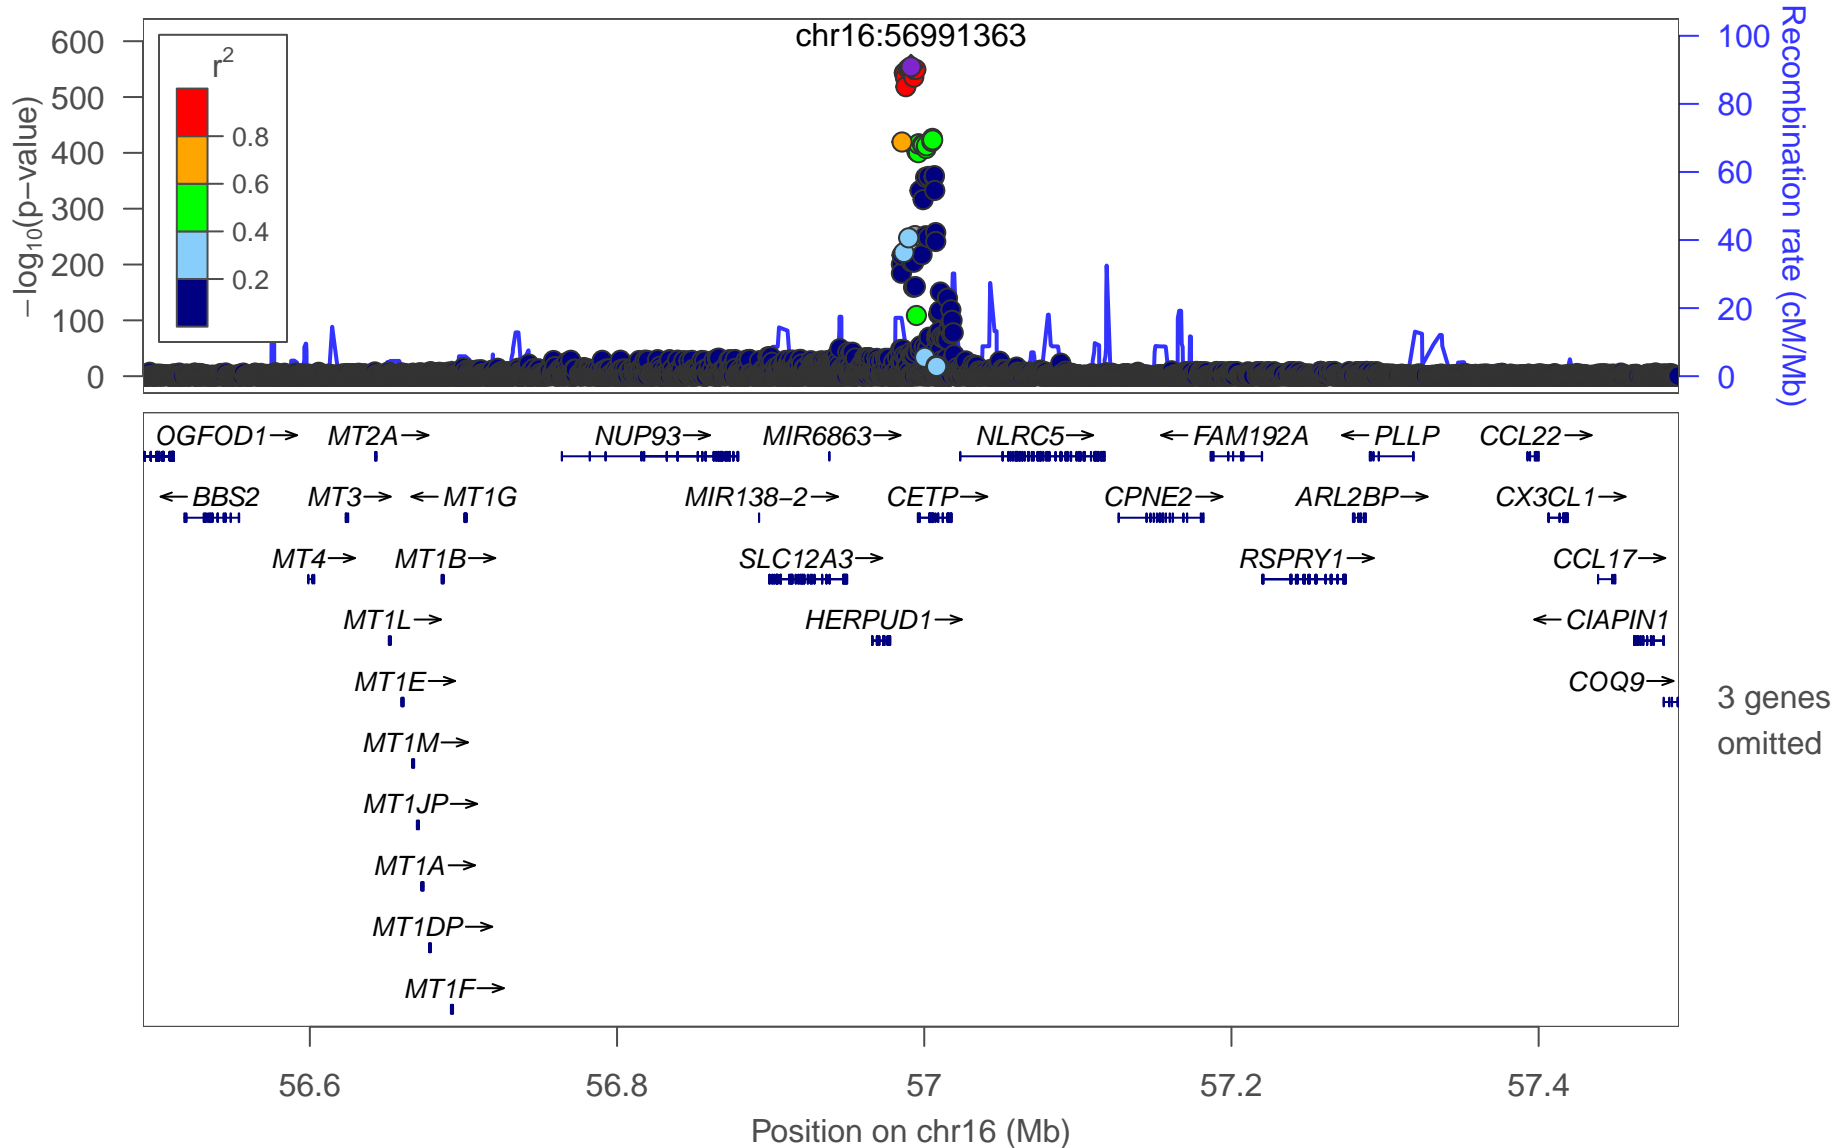

# 16\_6:Tyr

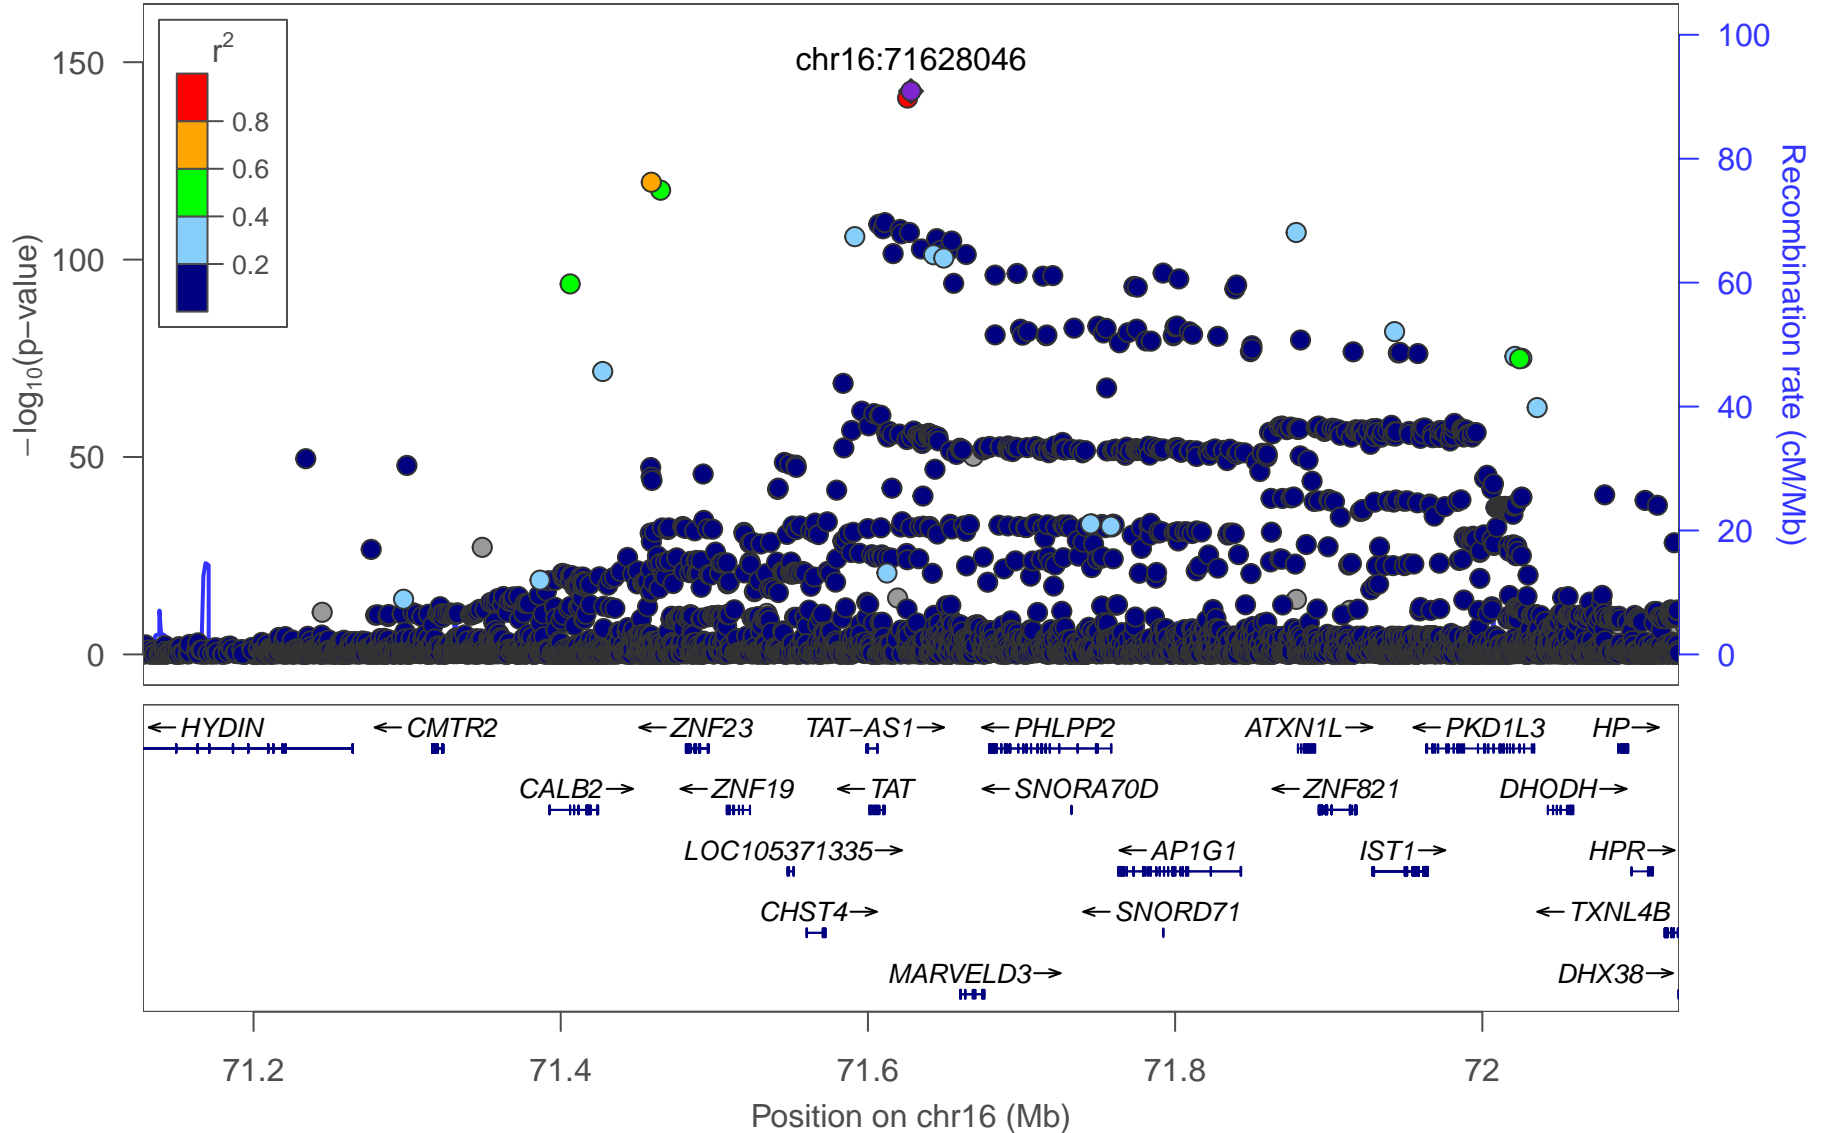



# 16\_7:Gly

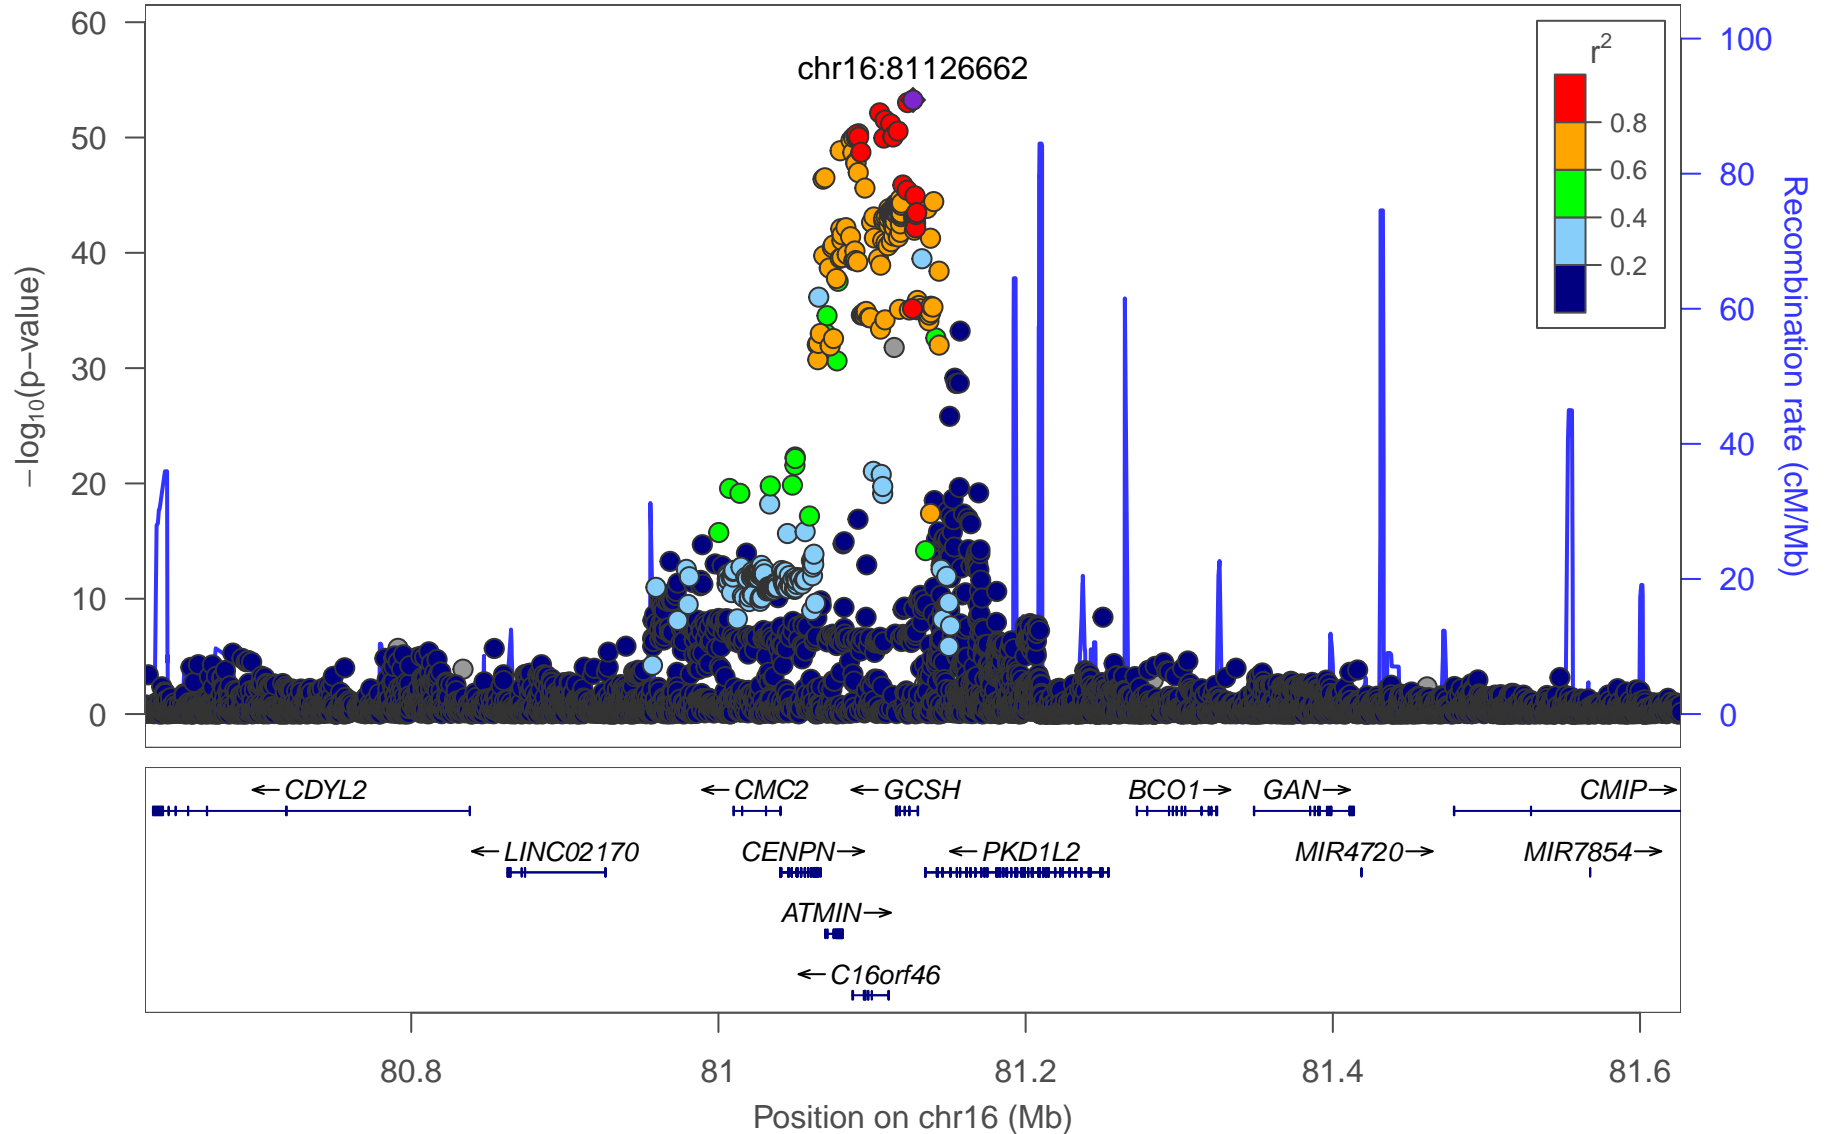

# 16\_8:Crea

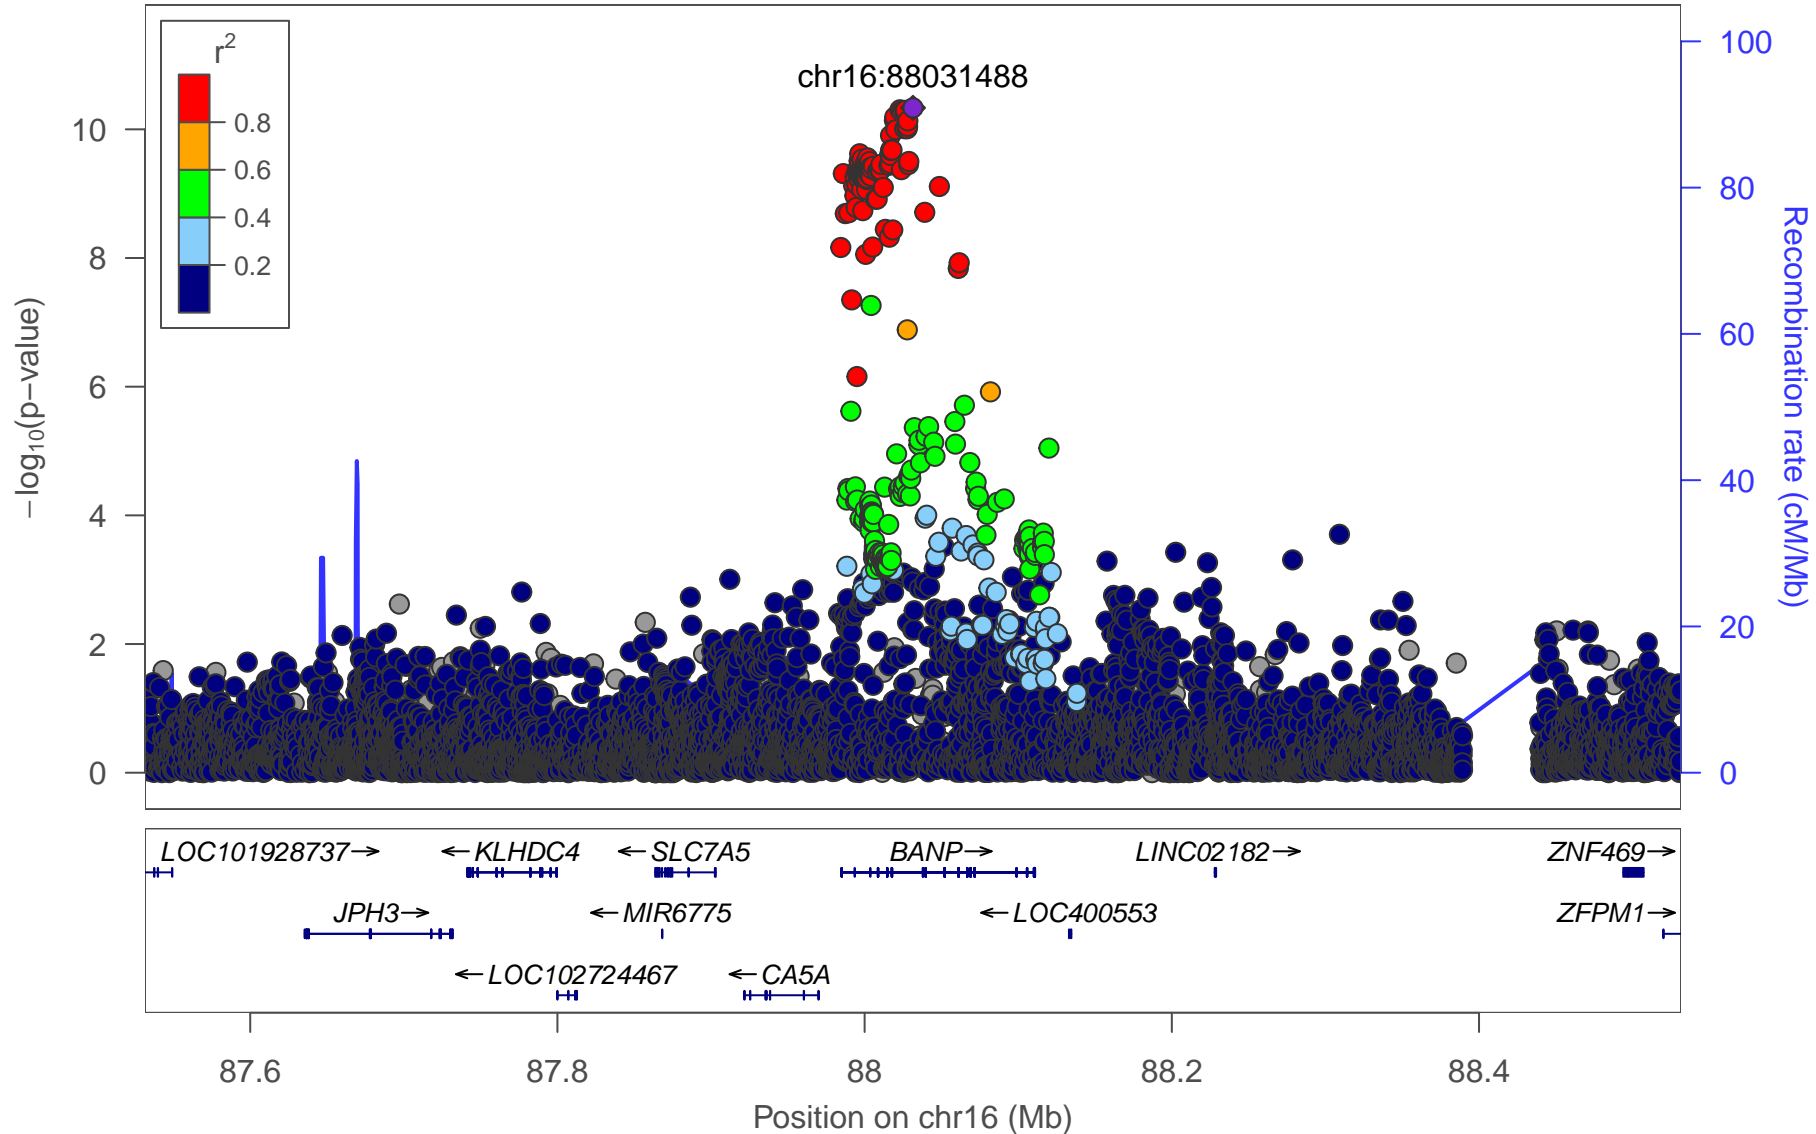

# 16\_9:Crea

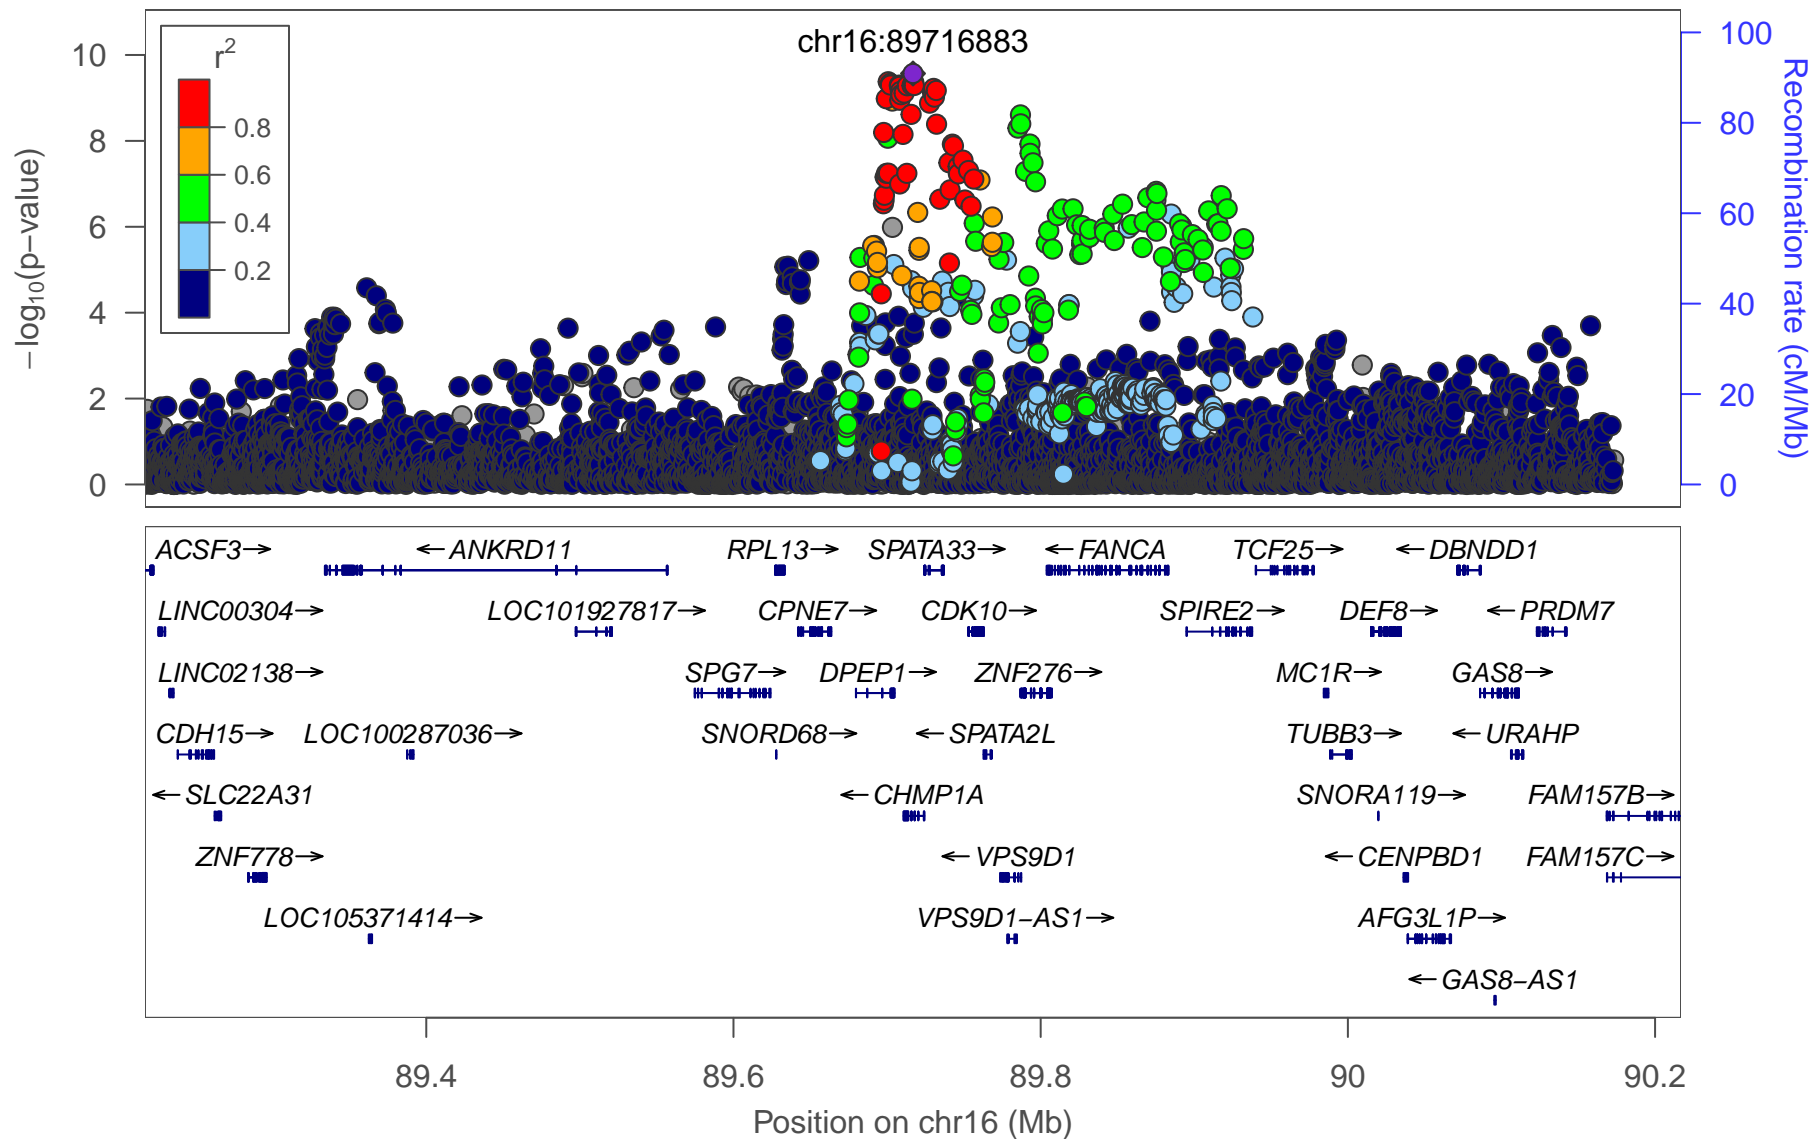

# 17\_1:Alb

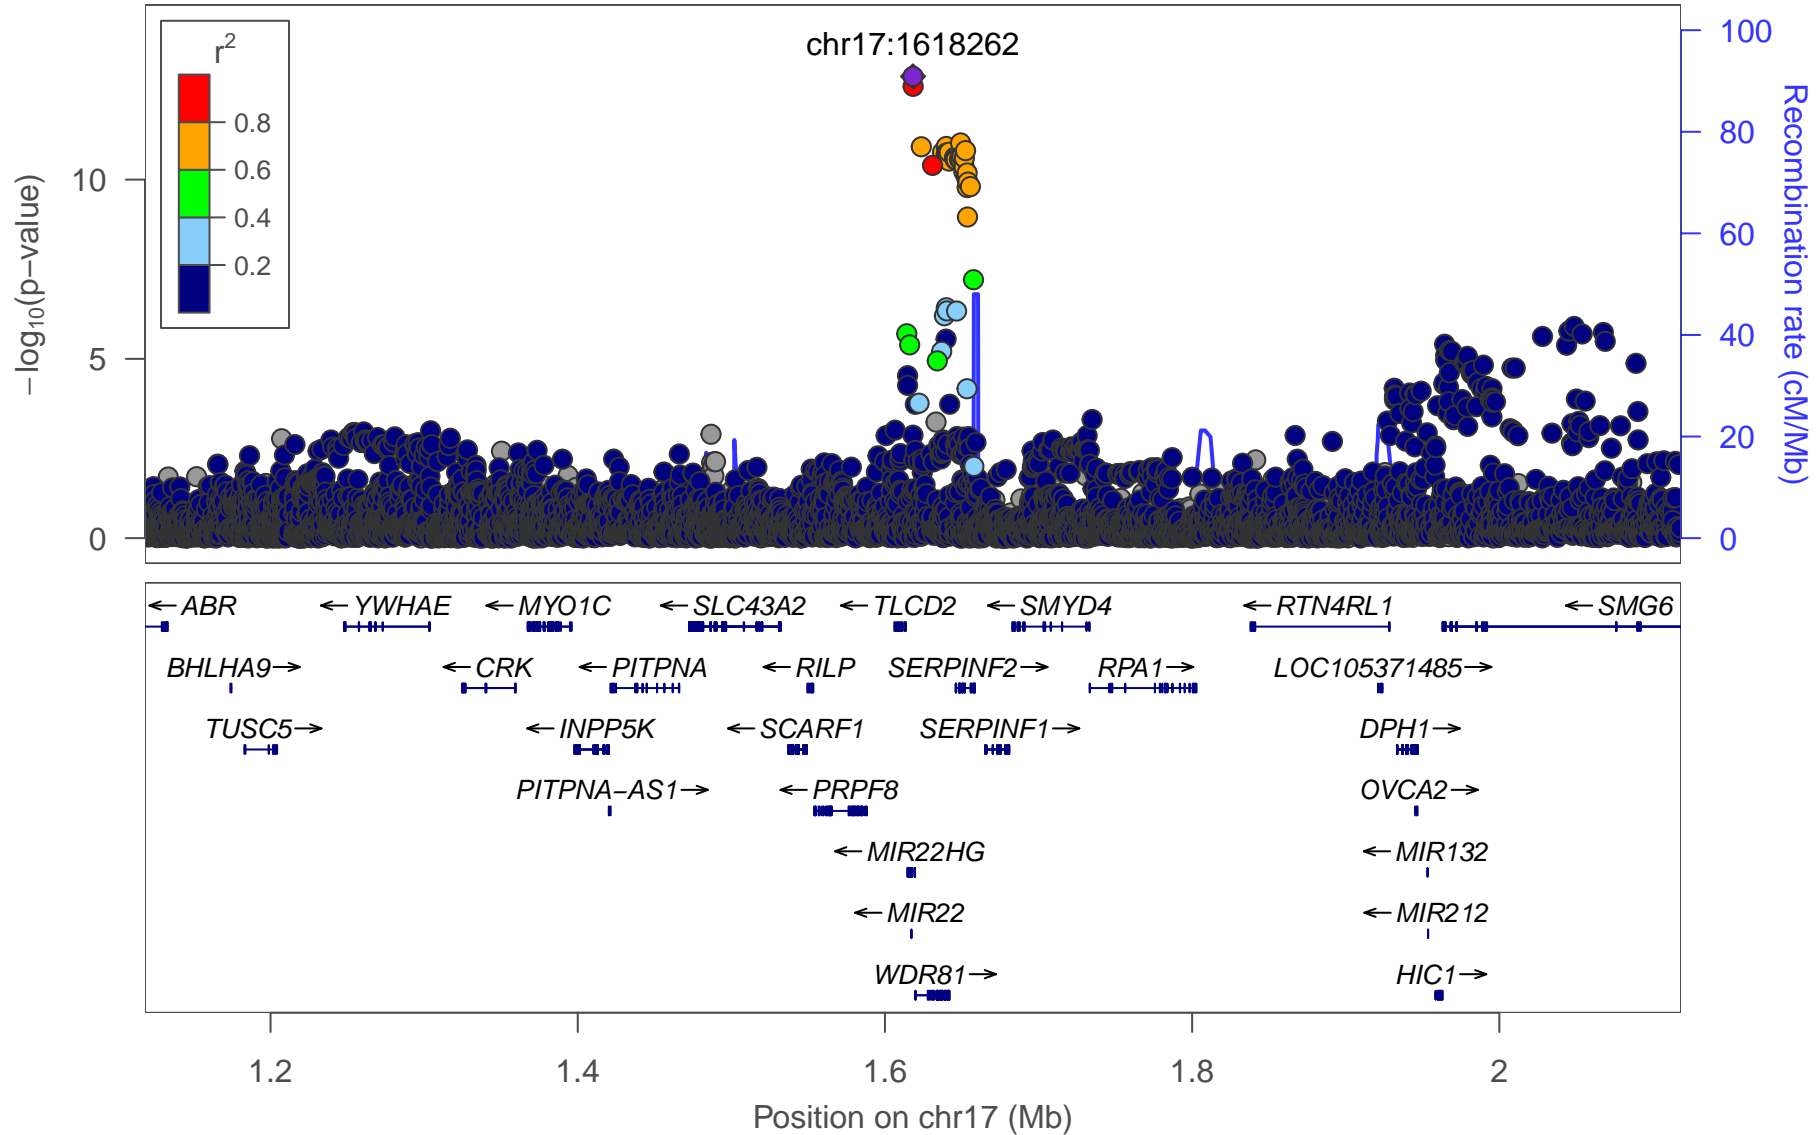

# 17\_2:IDL-TG

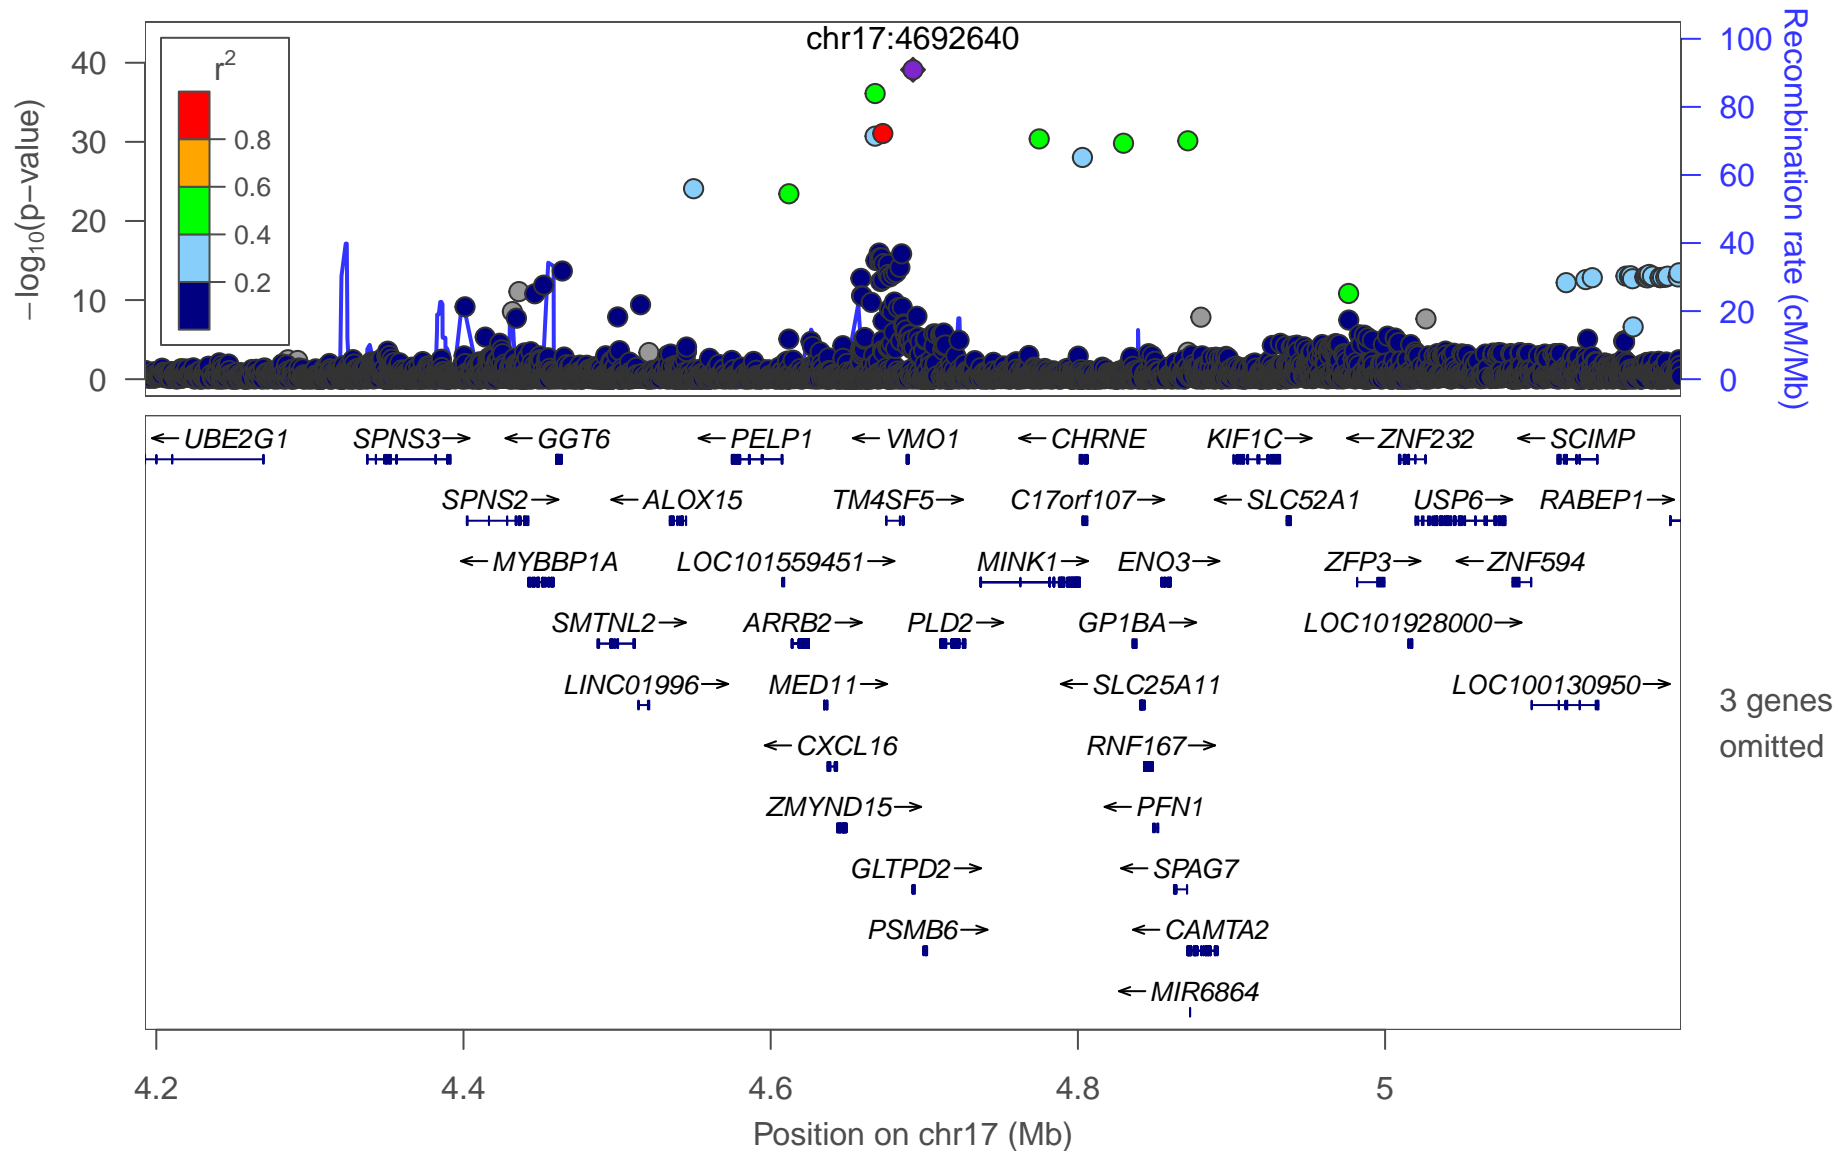

# 17\_3:Cit

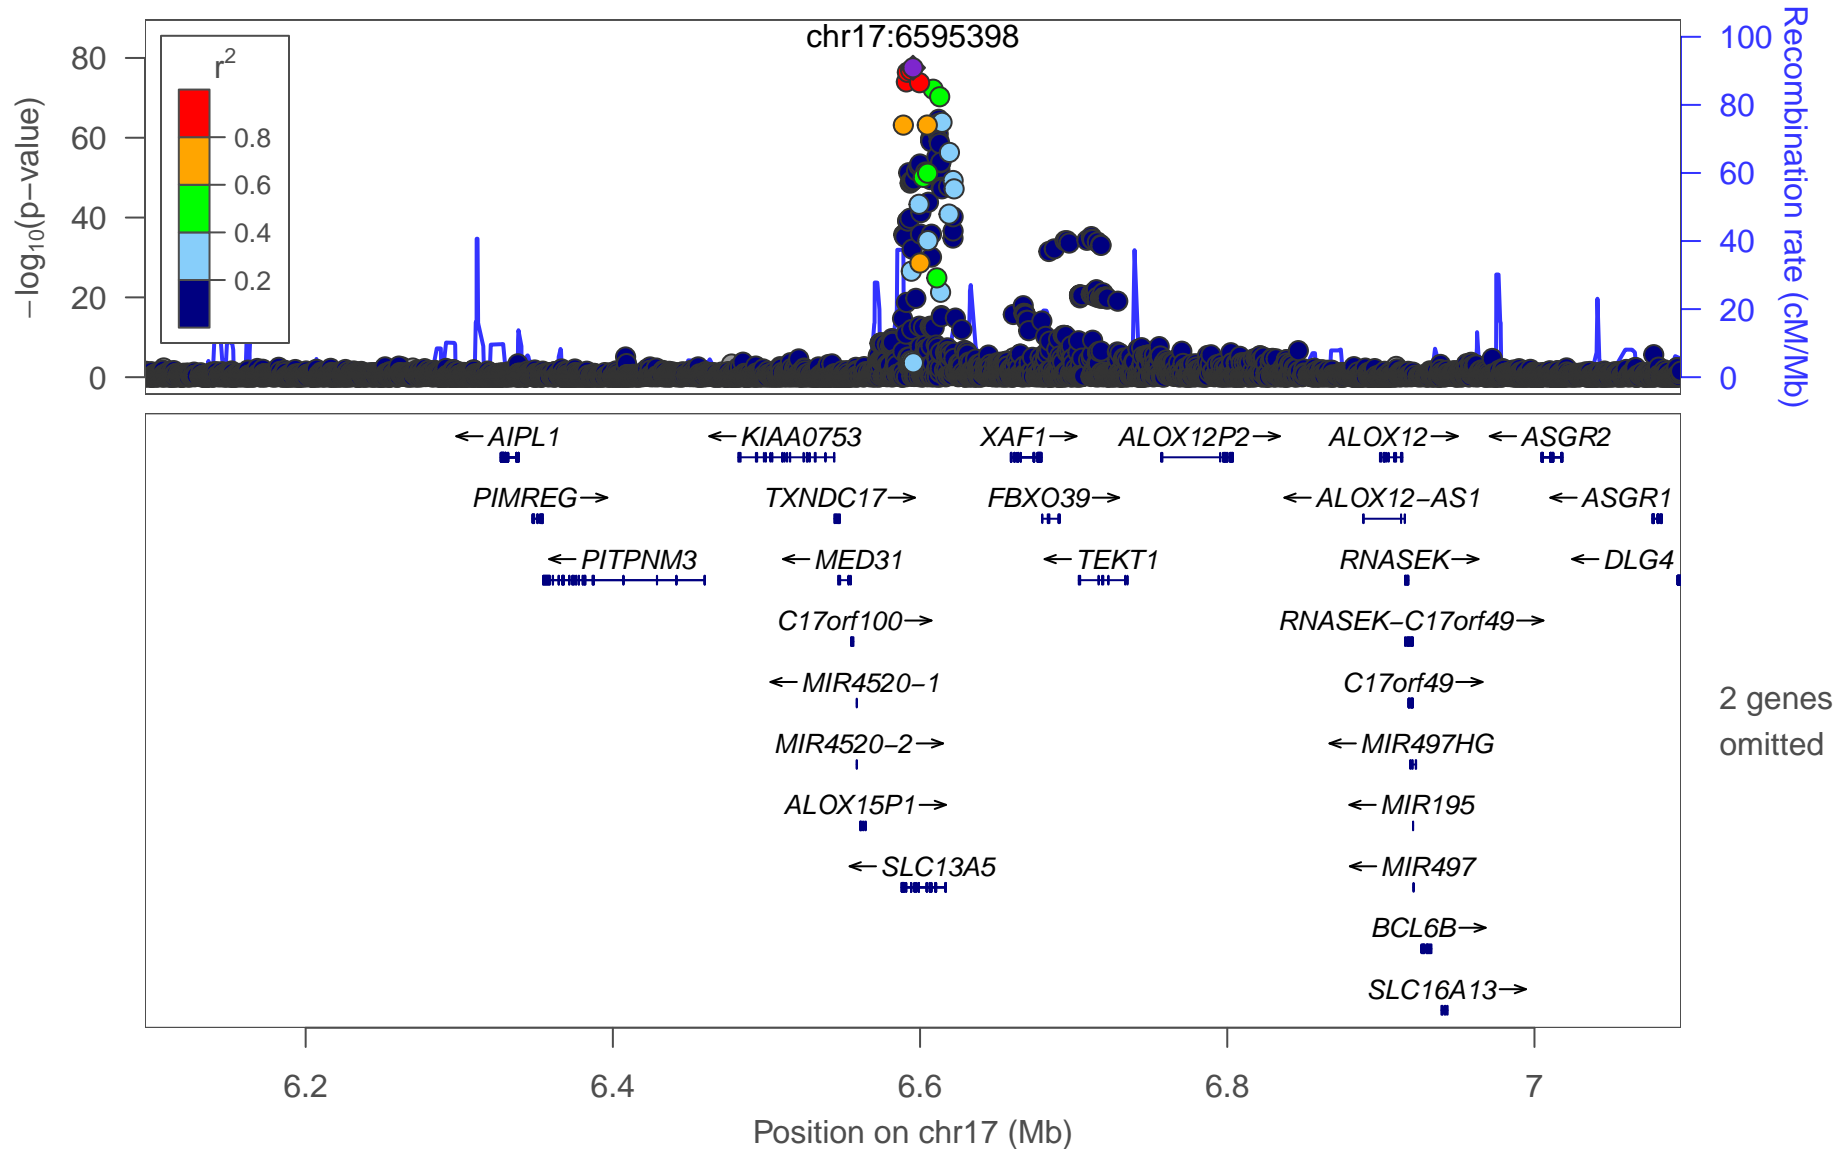

# 17\_4:LDL-D

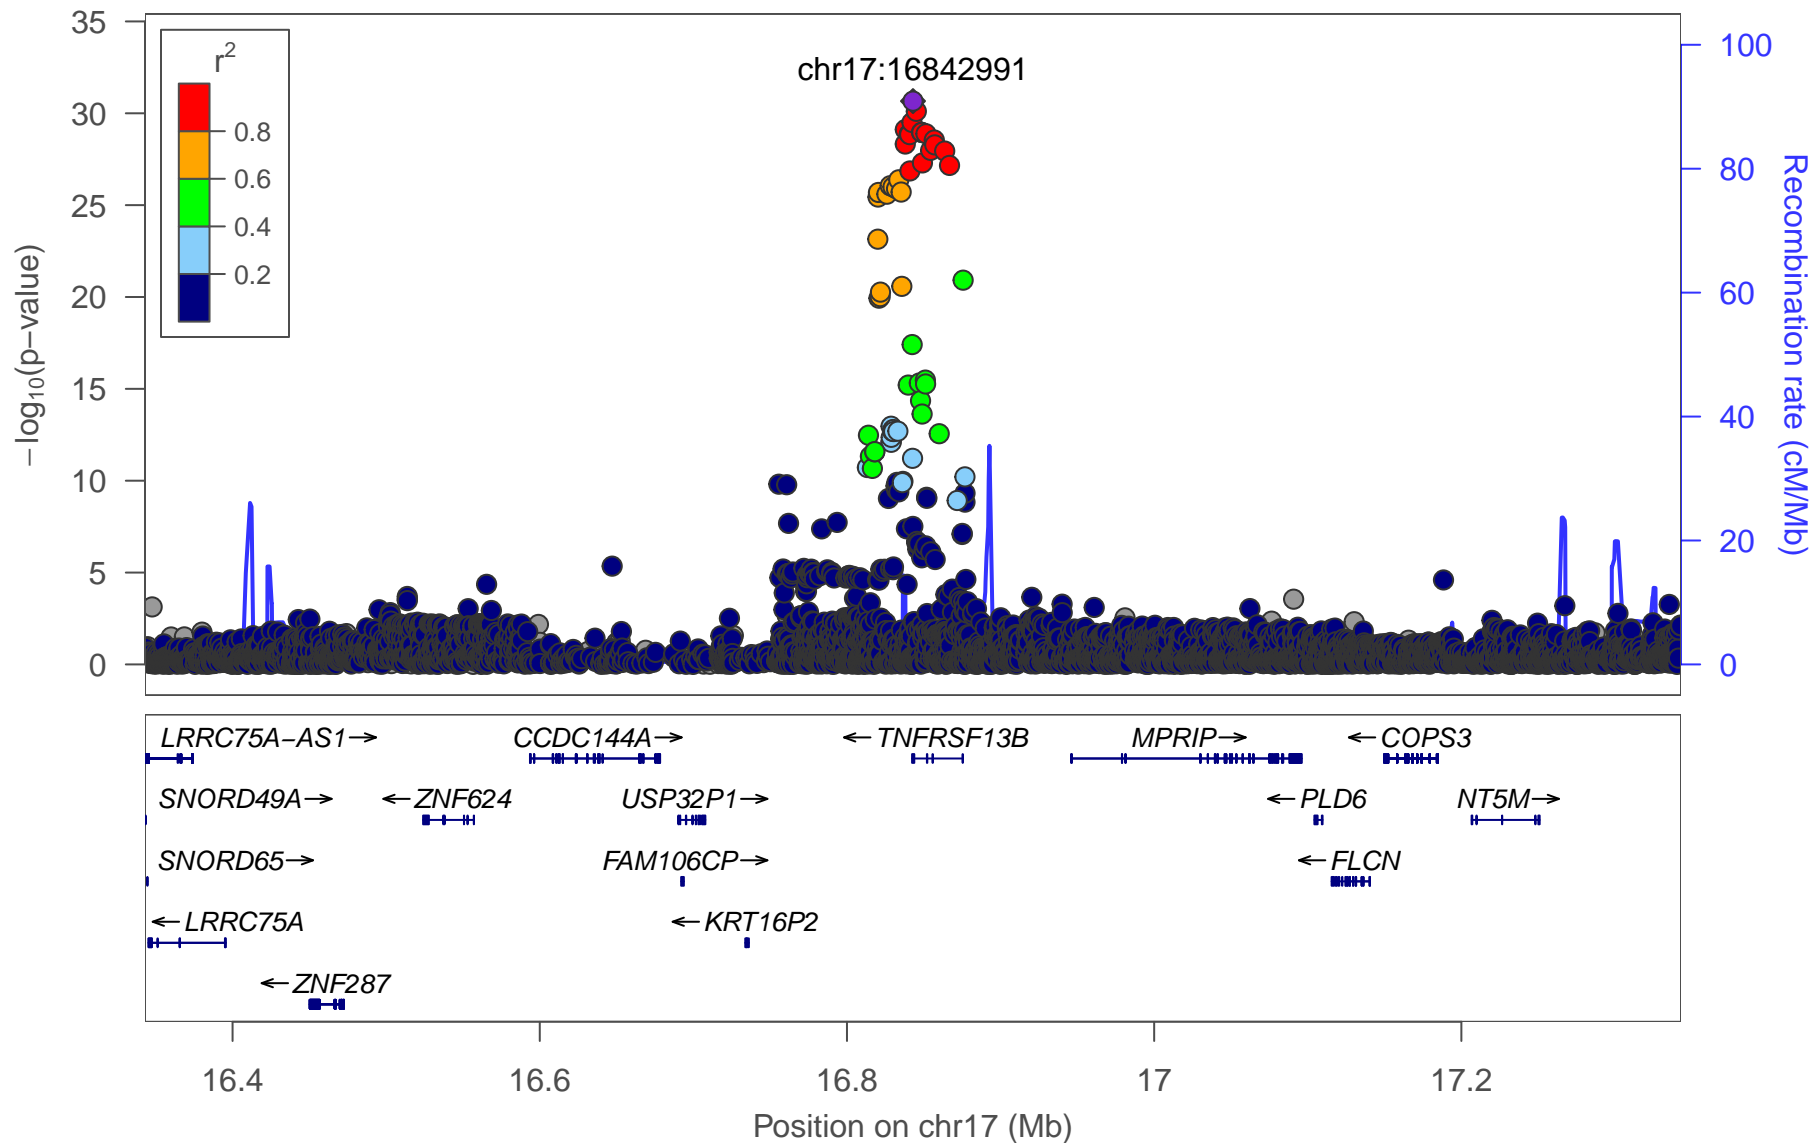

# 17\_5:Crea

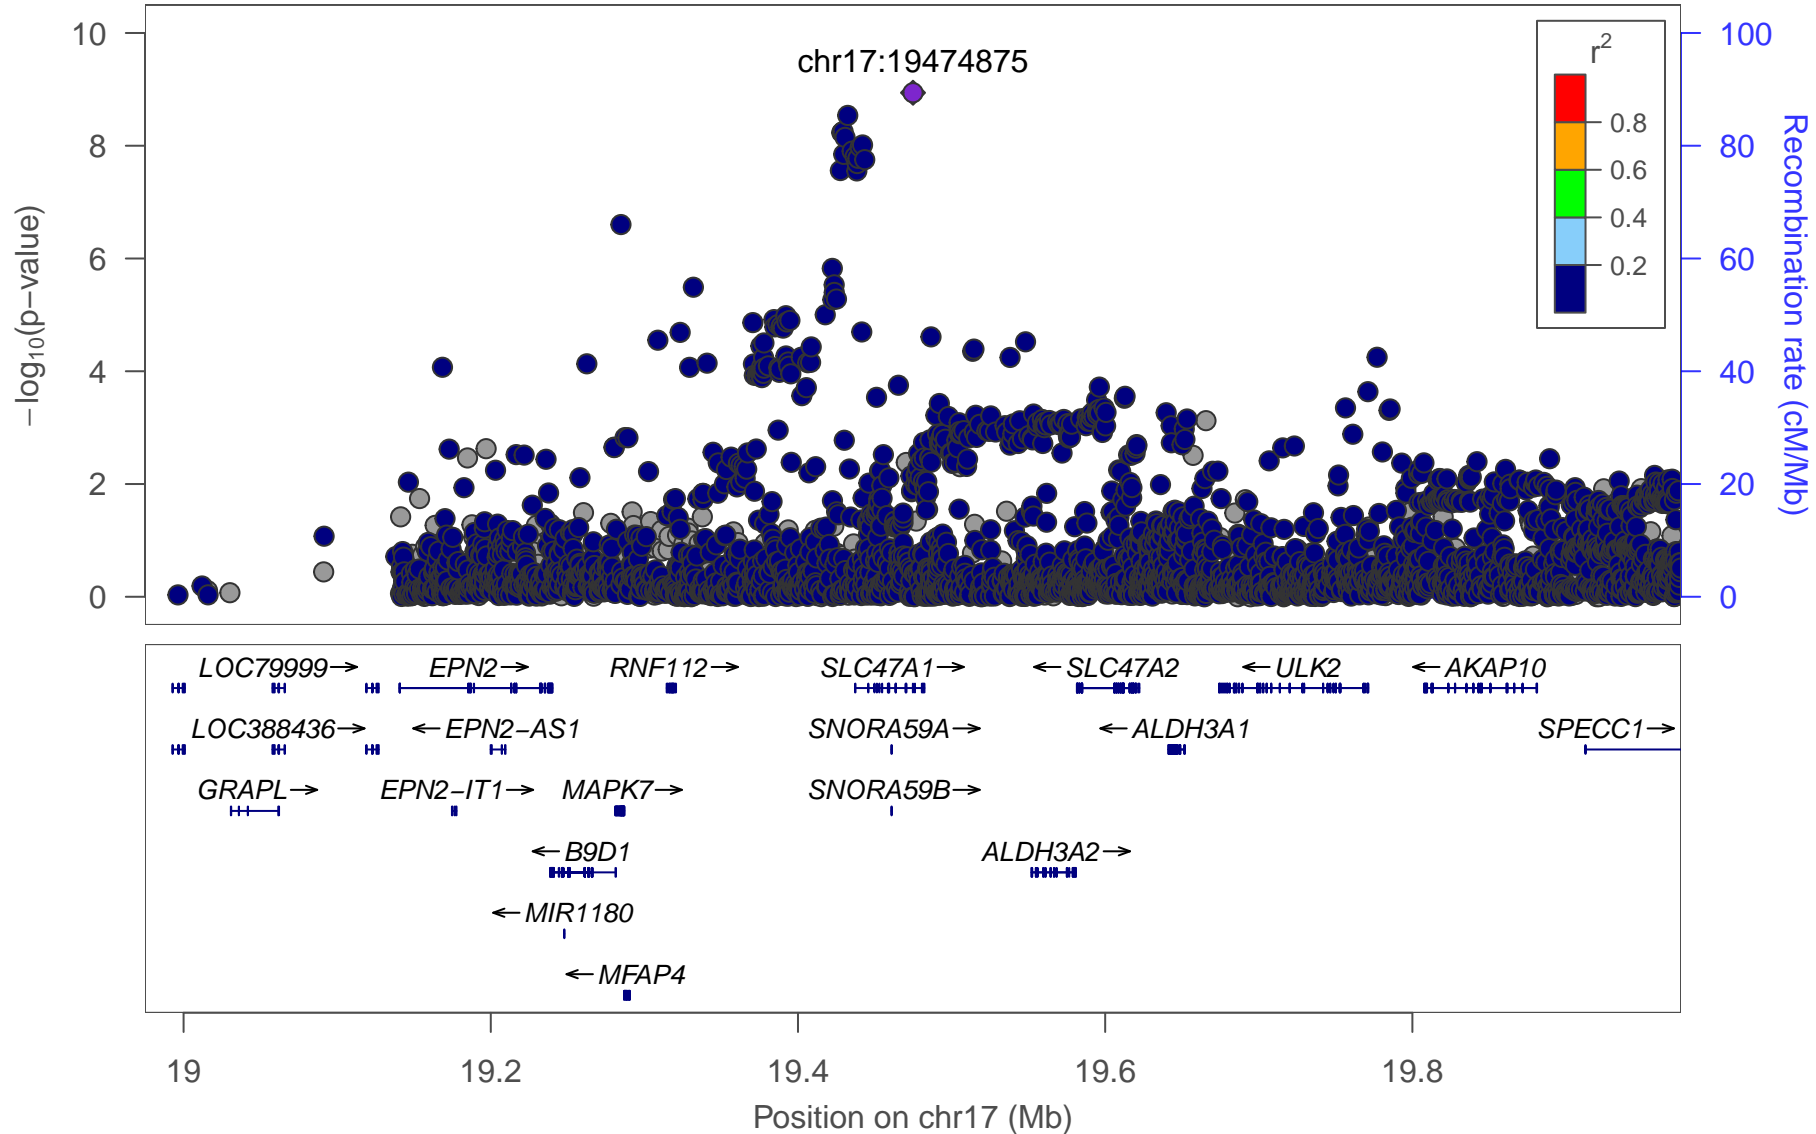



# 17\_6:S-HDL-PL\_percent

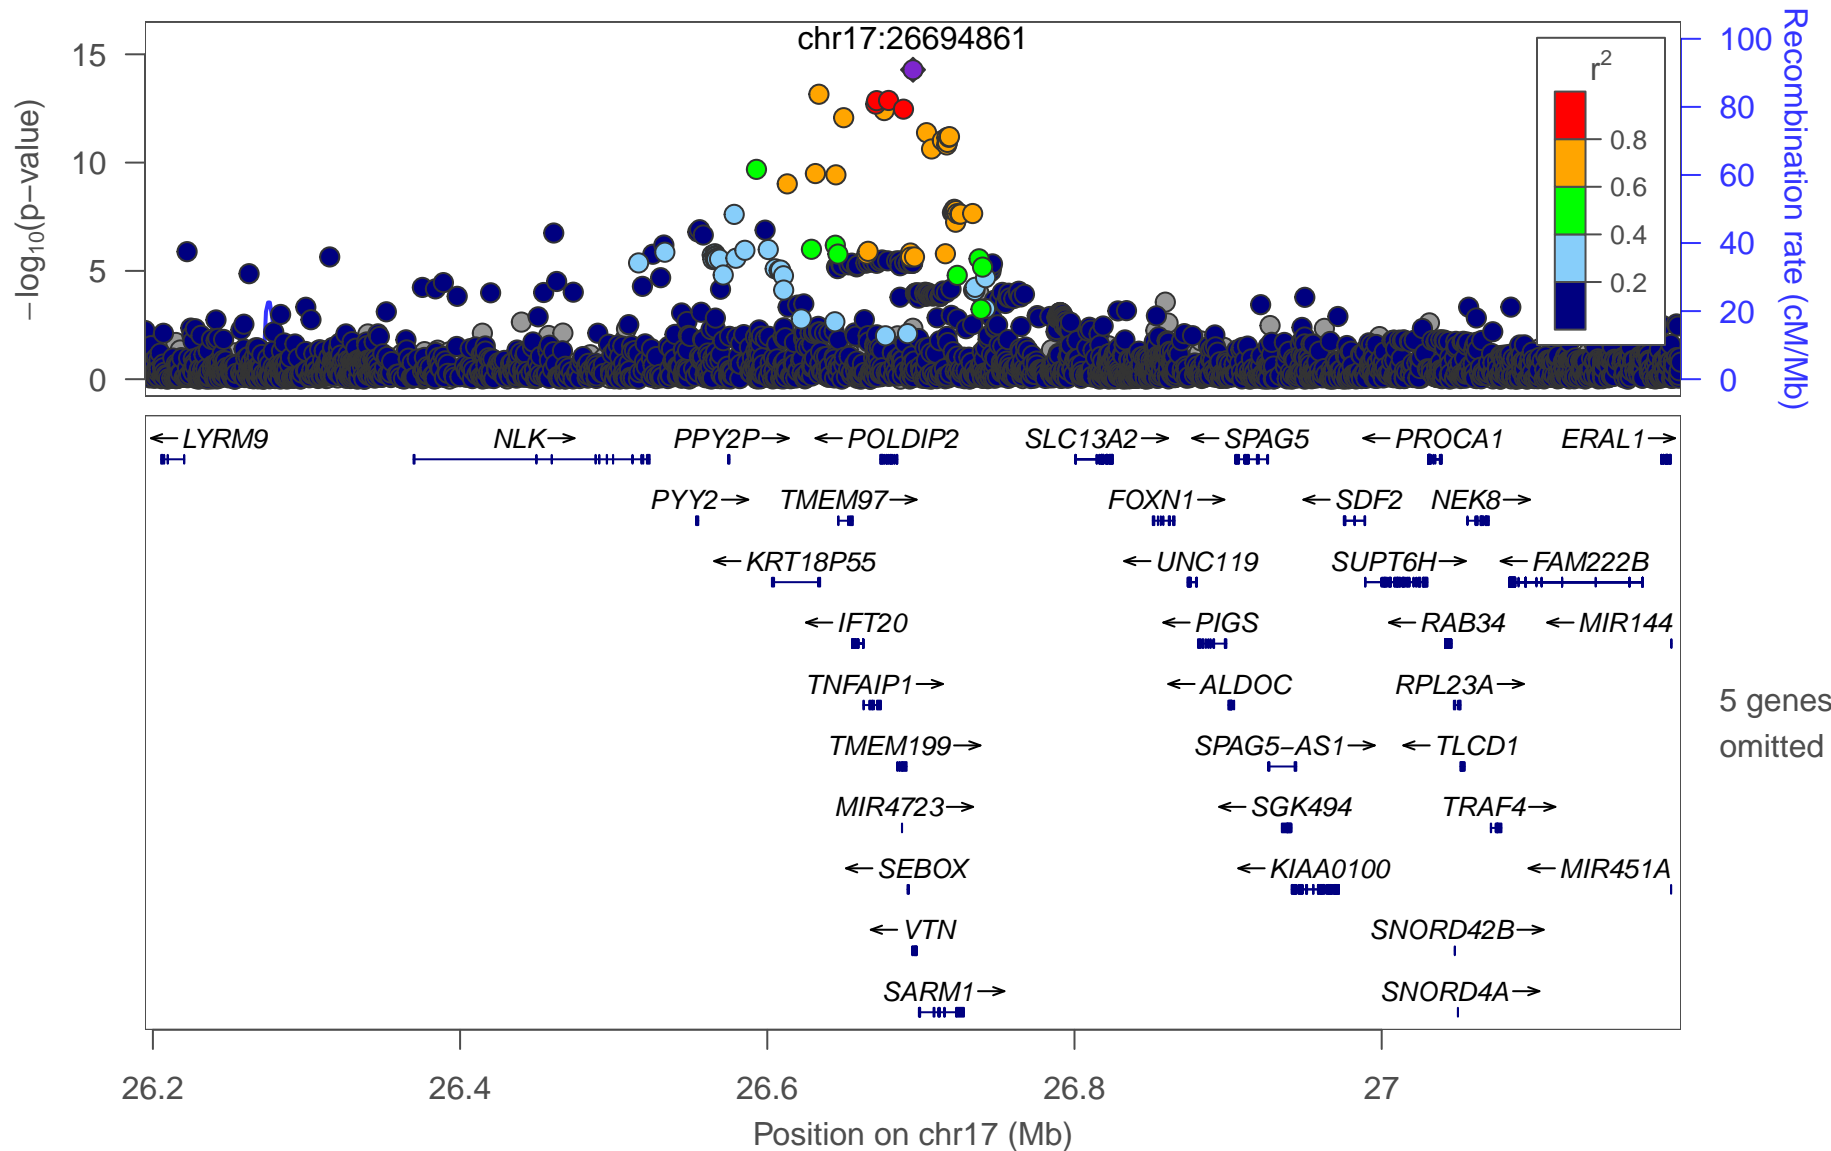

# 17\_7:Crea

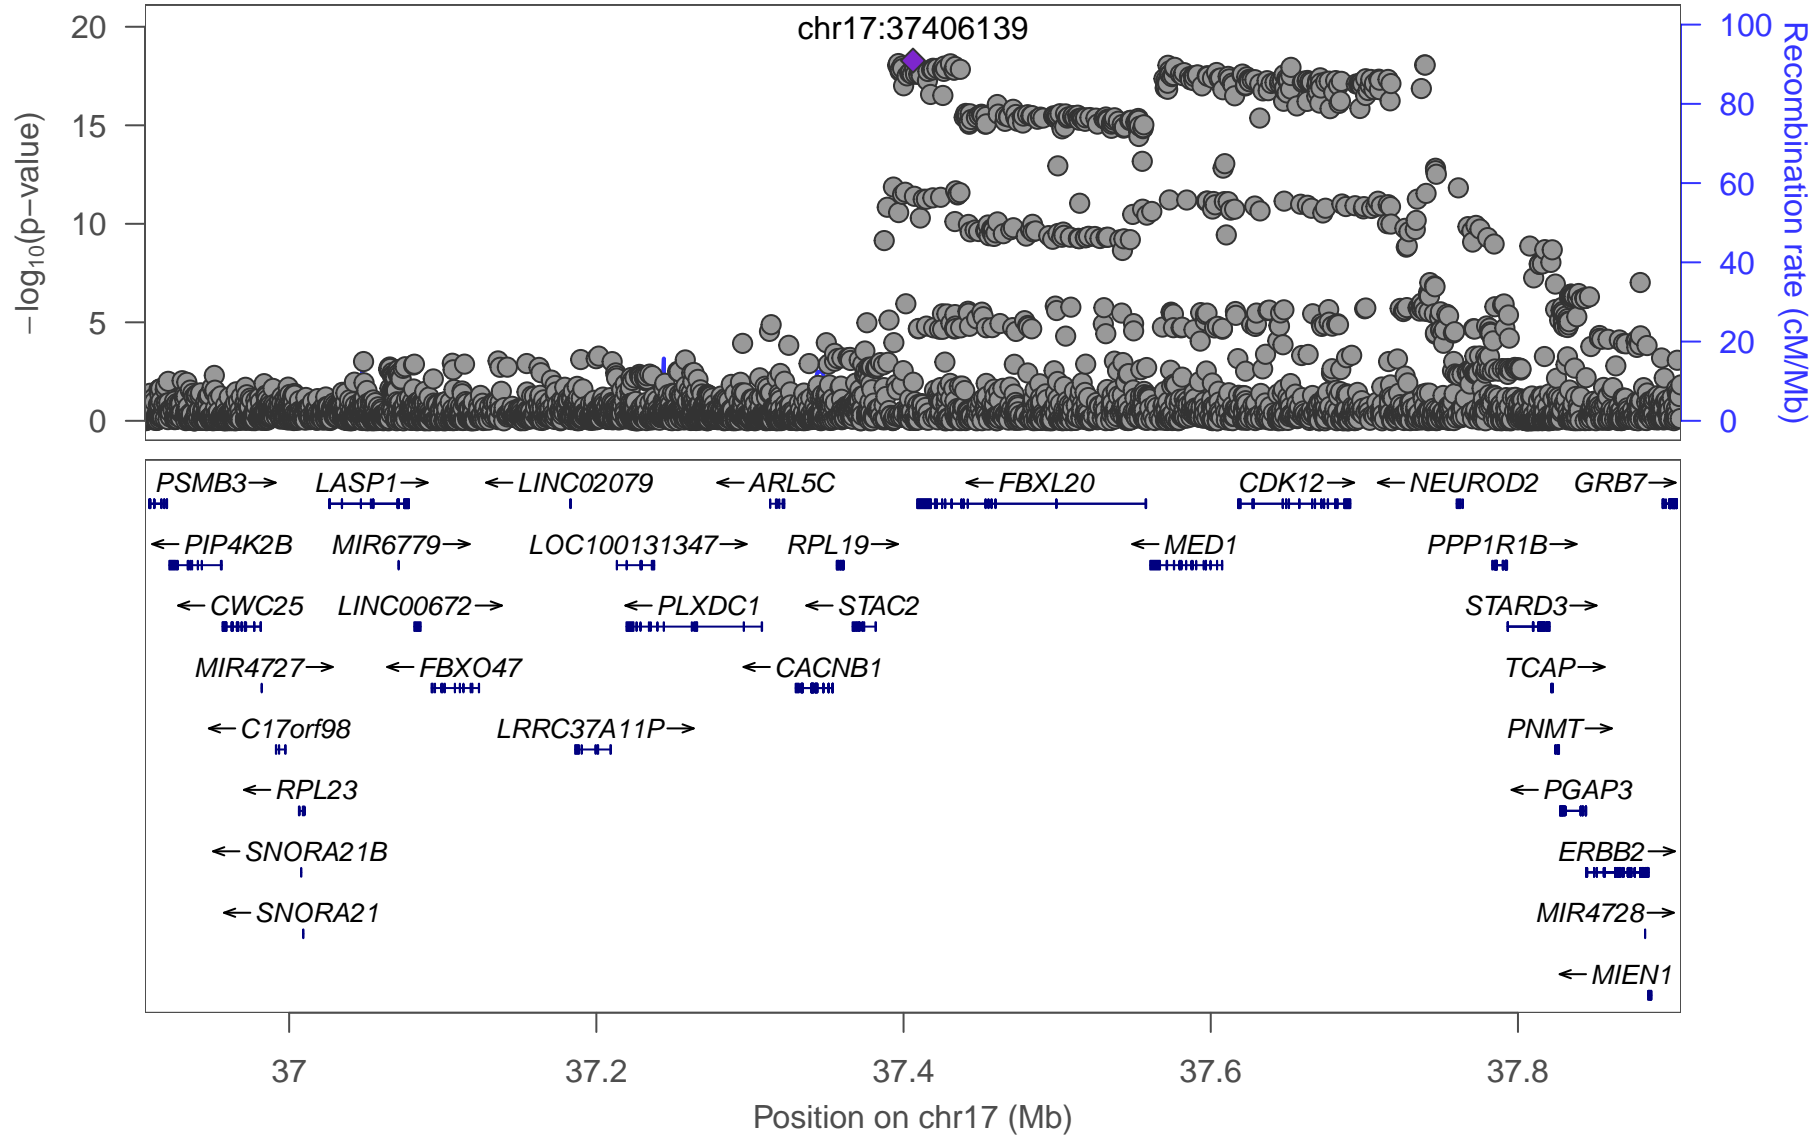

# 17\_8:HDL-D

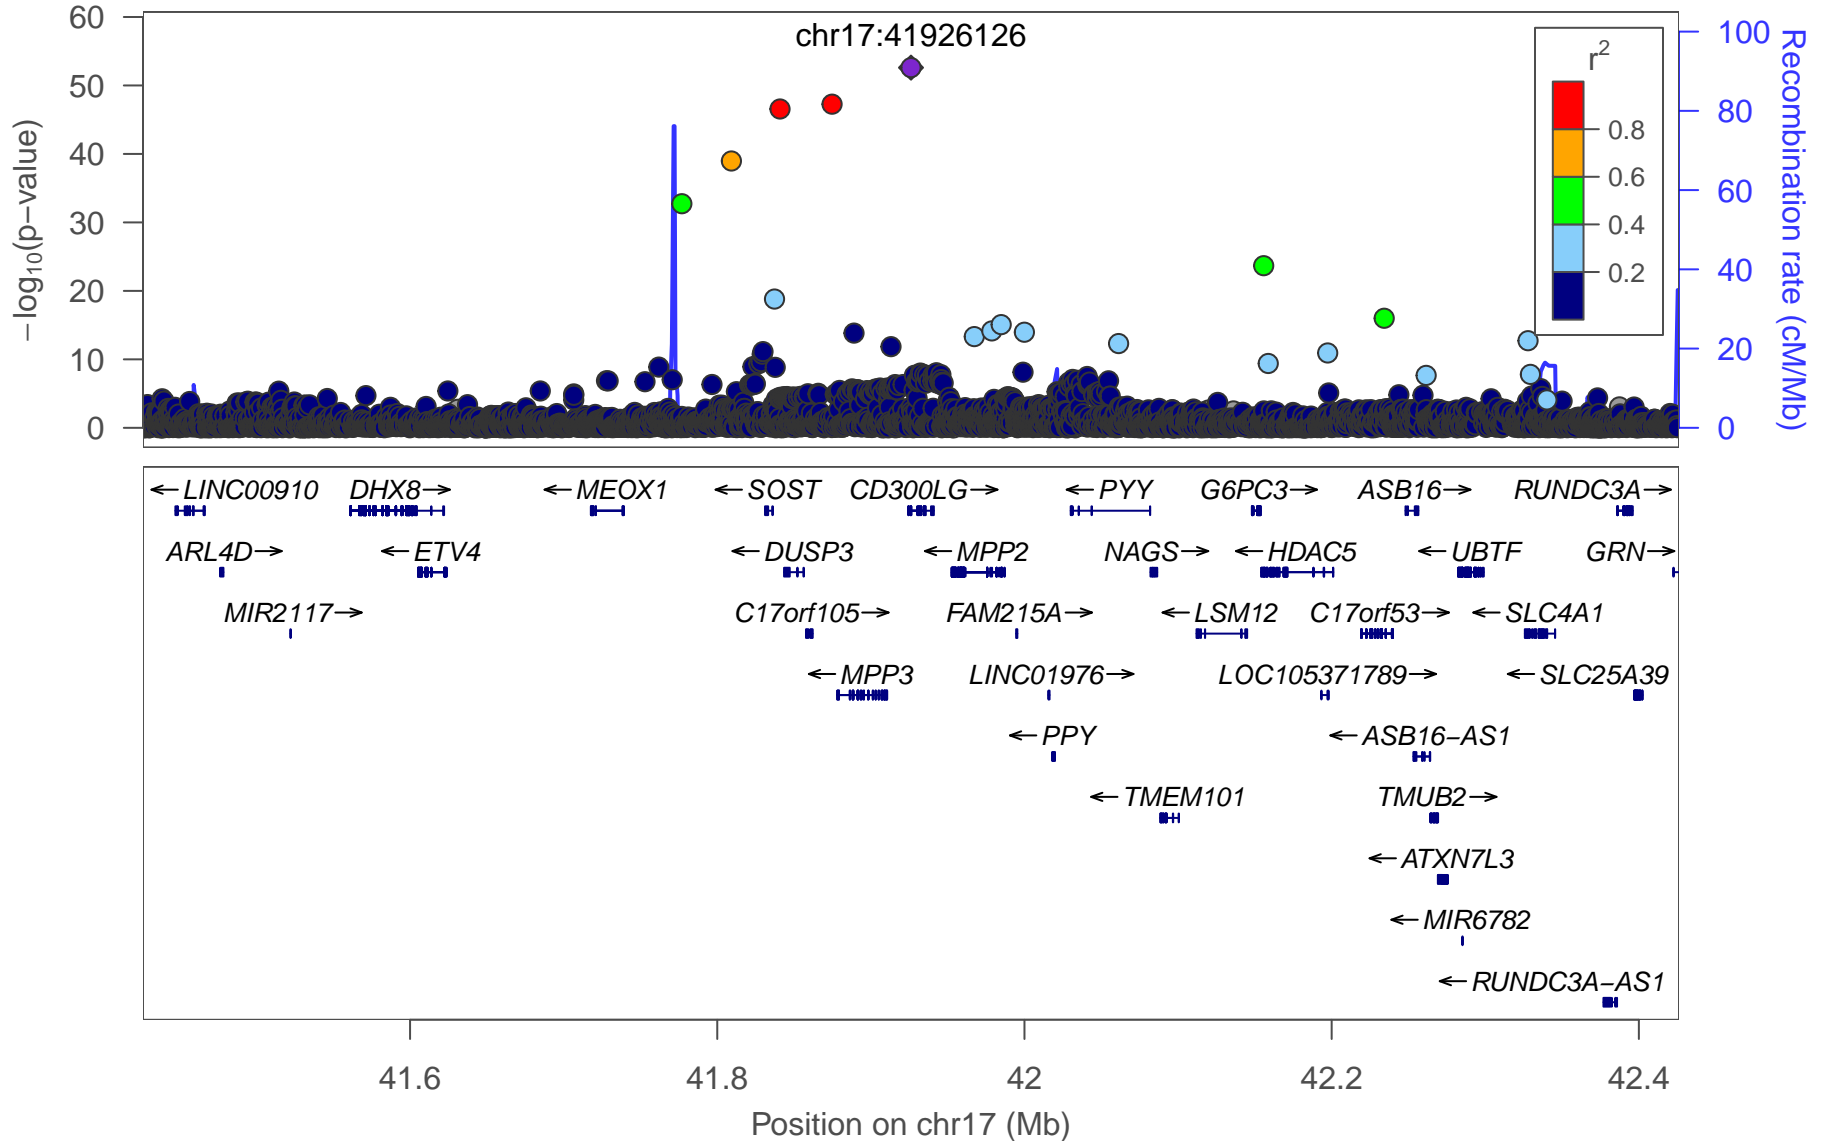

# 17\_9:L-LDL-FC

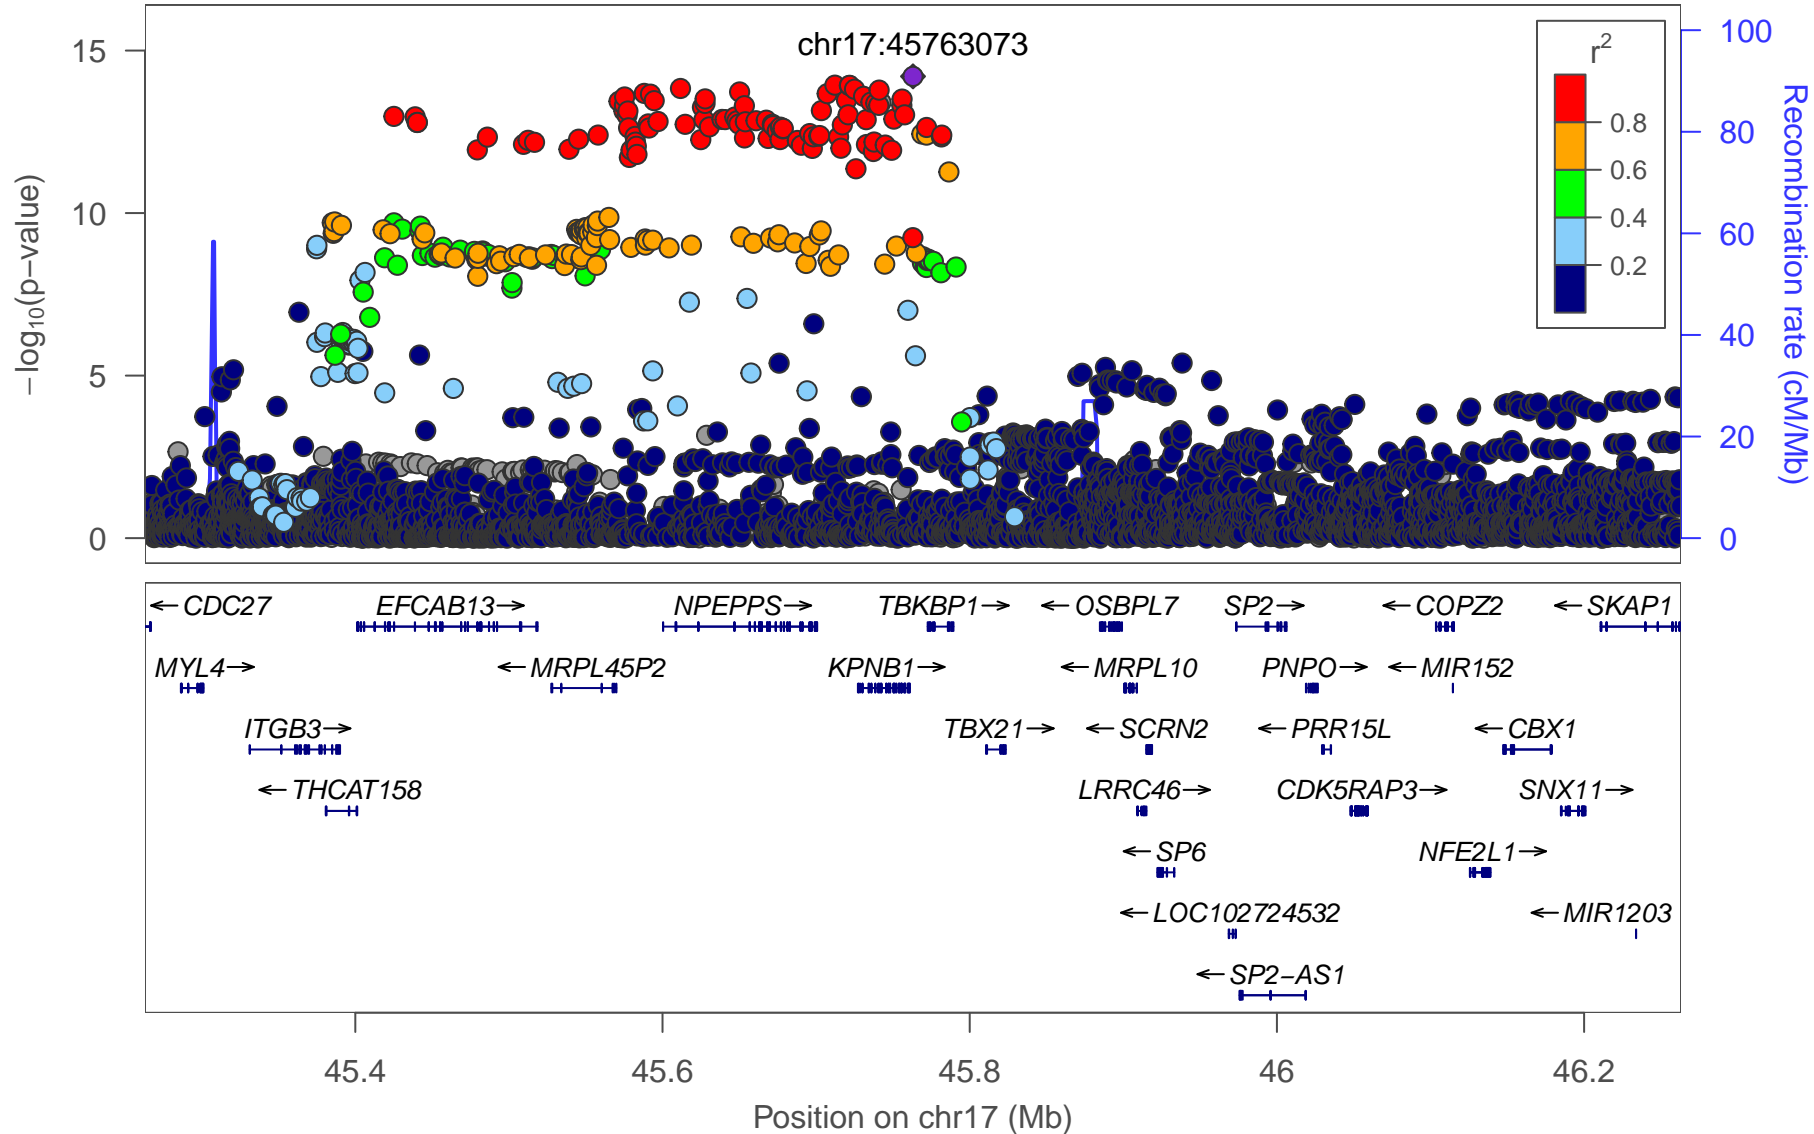

# 17\_10:S-LDL-FC\_percent

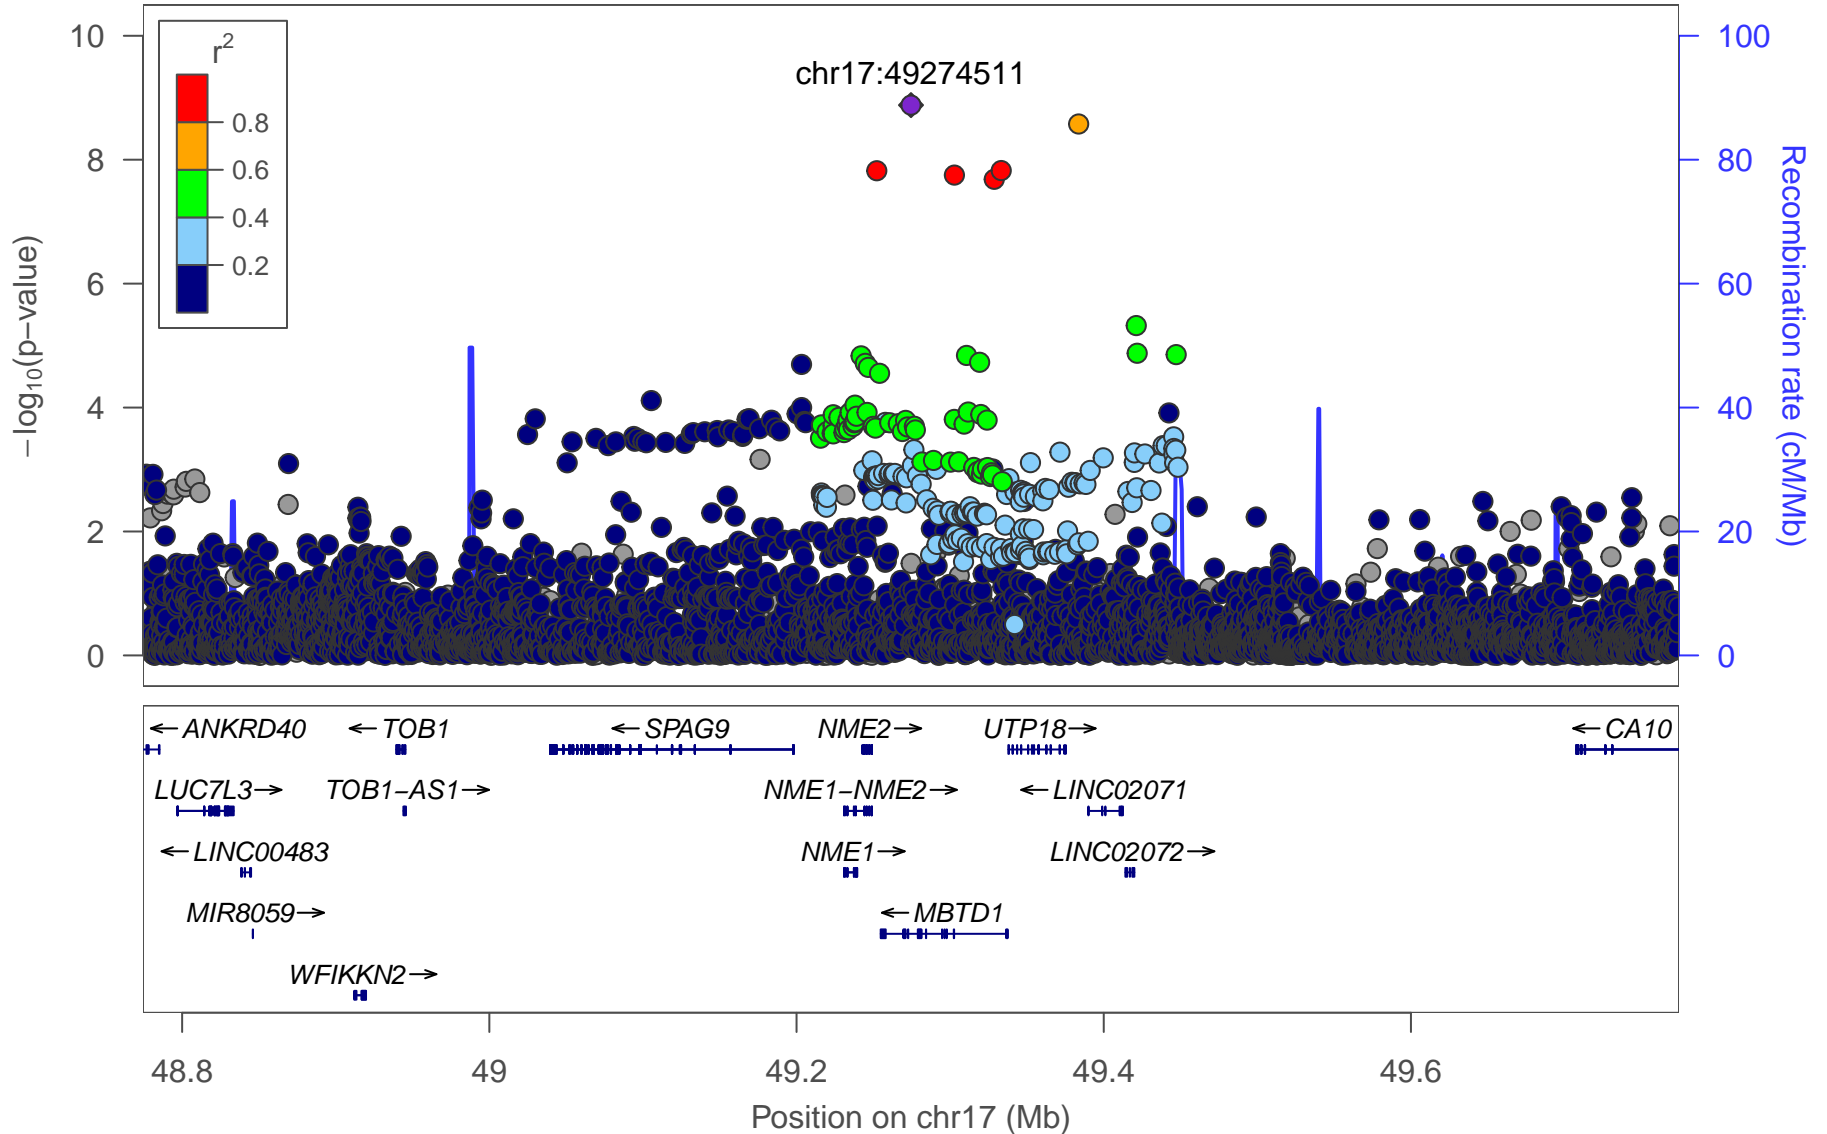

# 17\_11:Crea

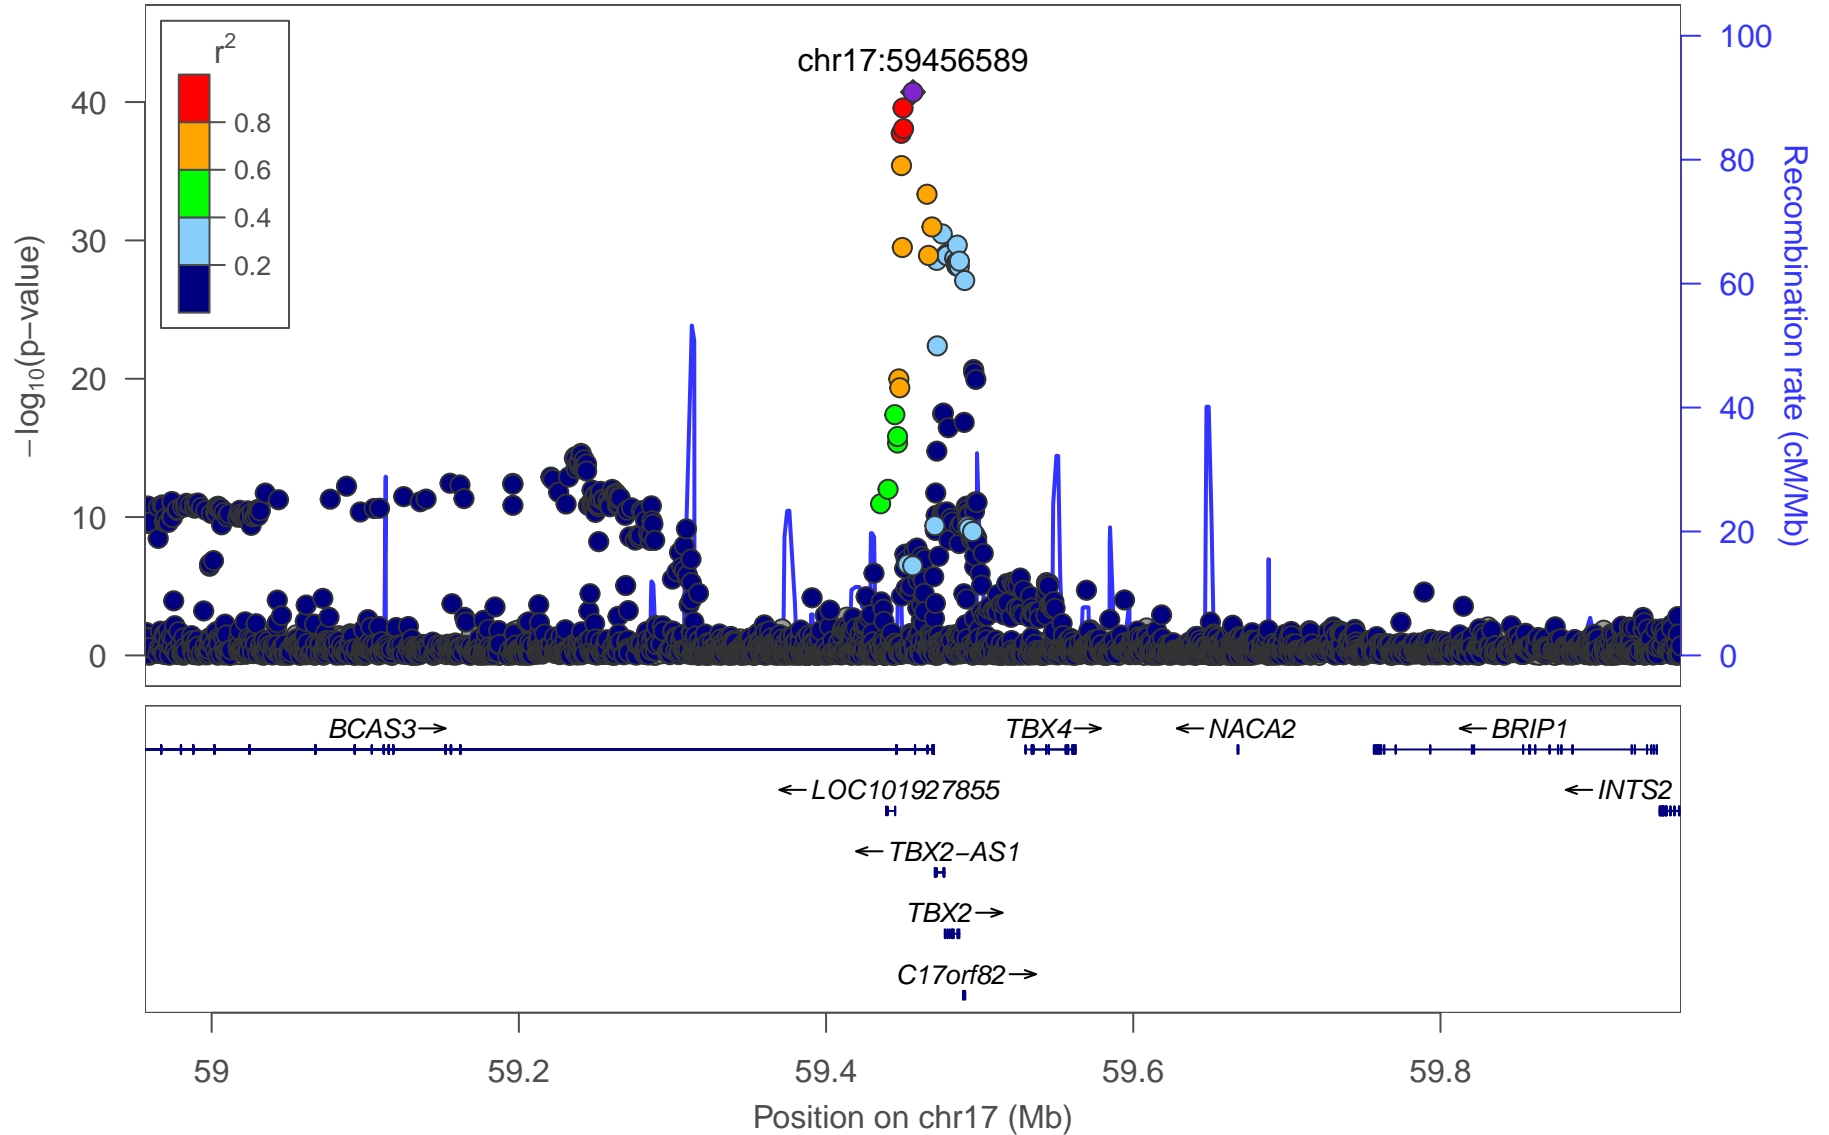

# 17\_12:M-VLDL-PL\_percent

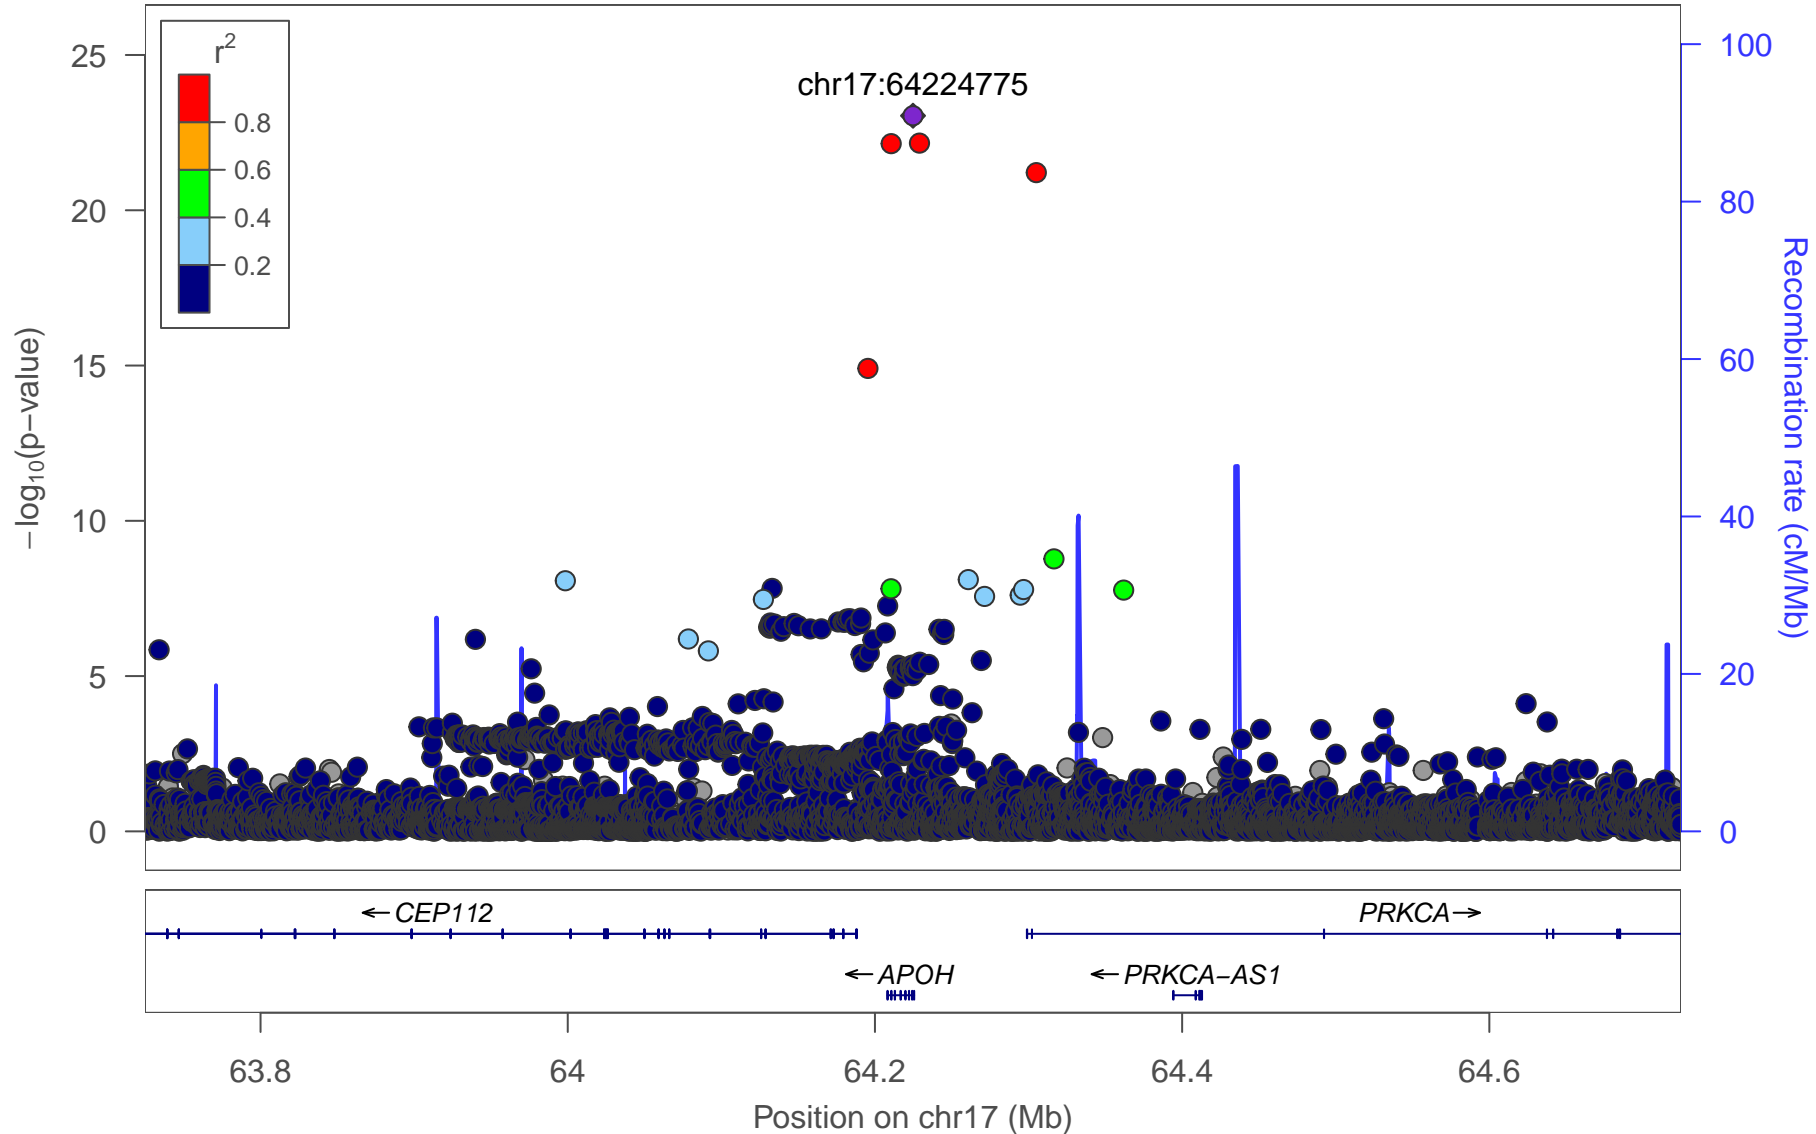

# 17\_13:L-LDL-FC

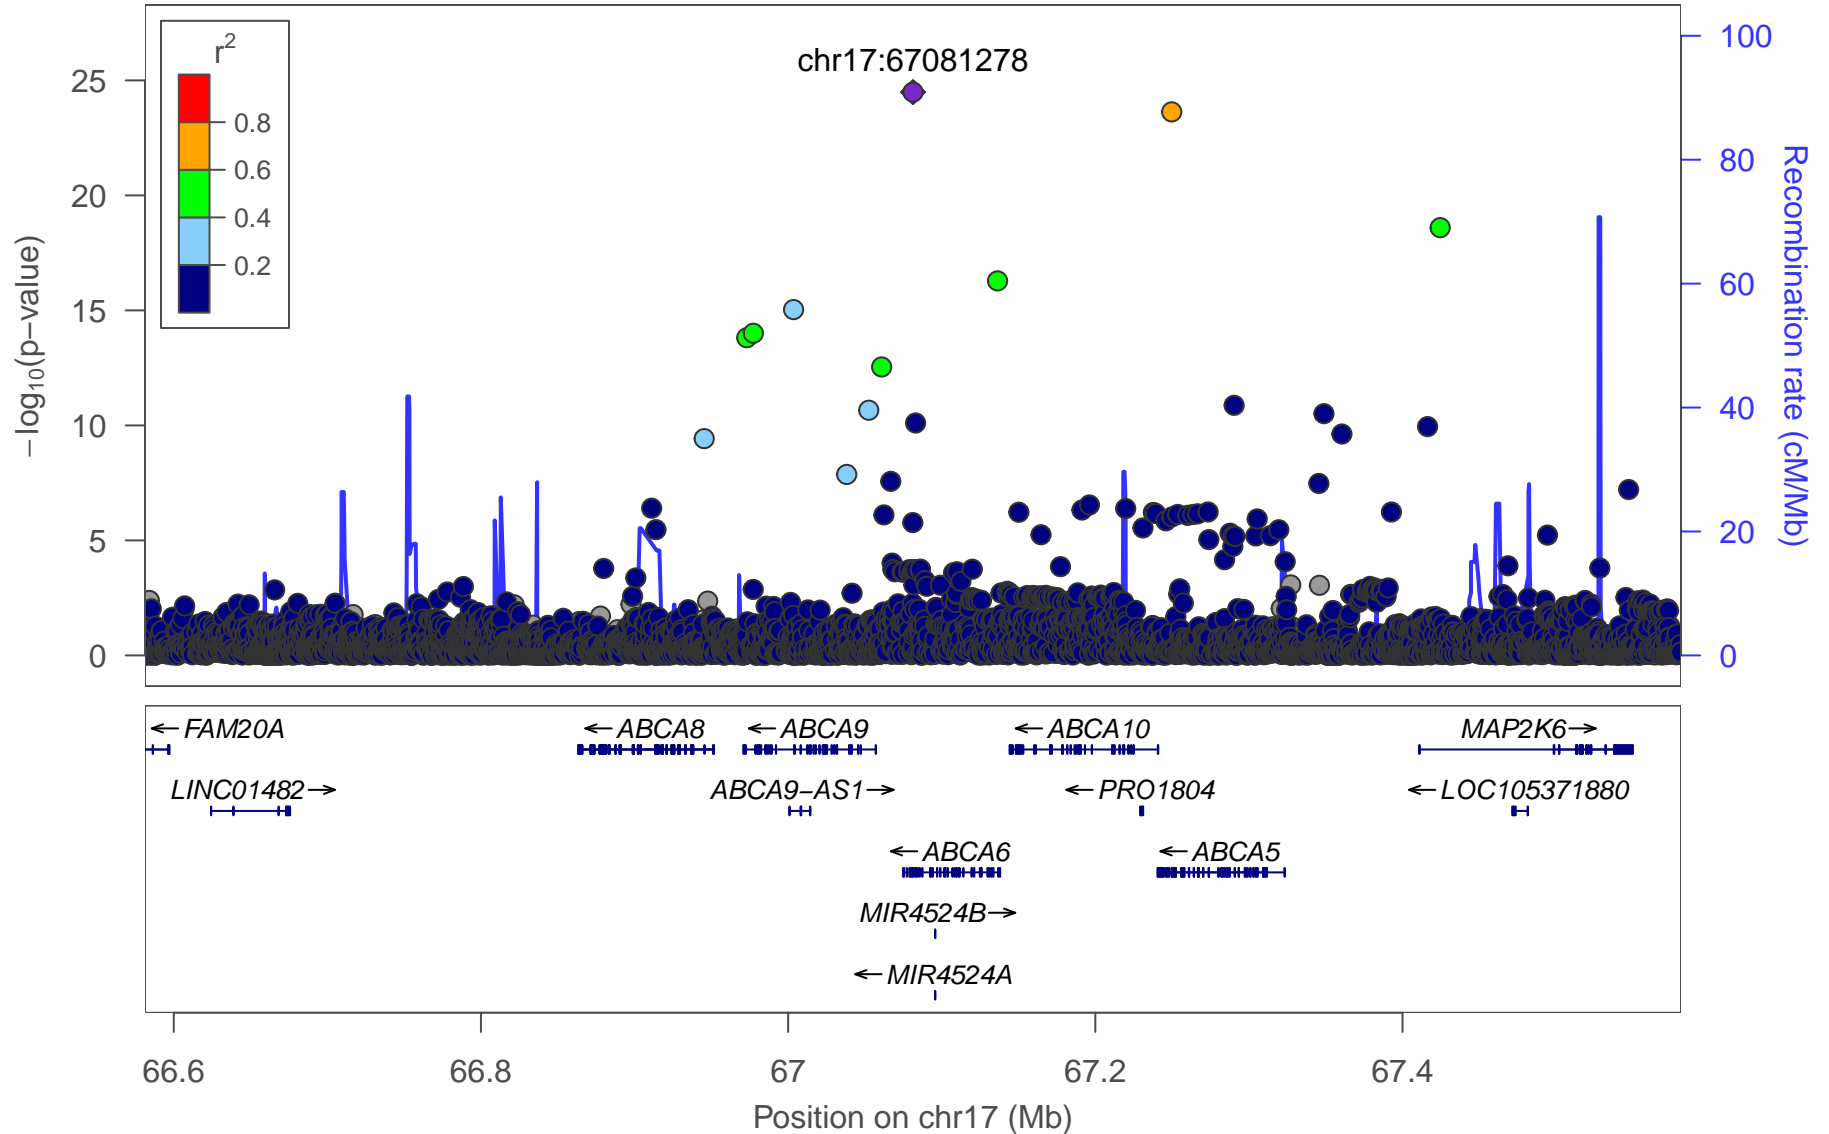



# 17\_14:ApoBbyApoA1

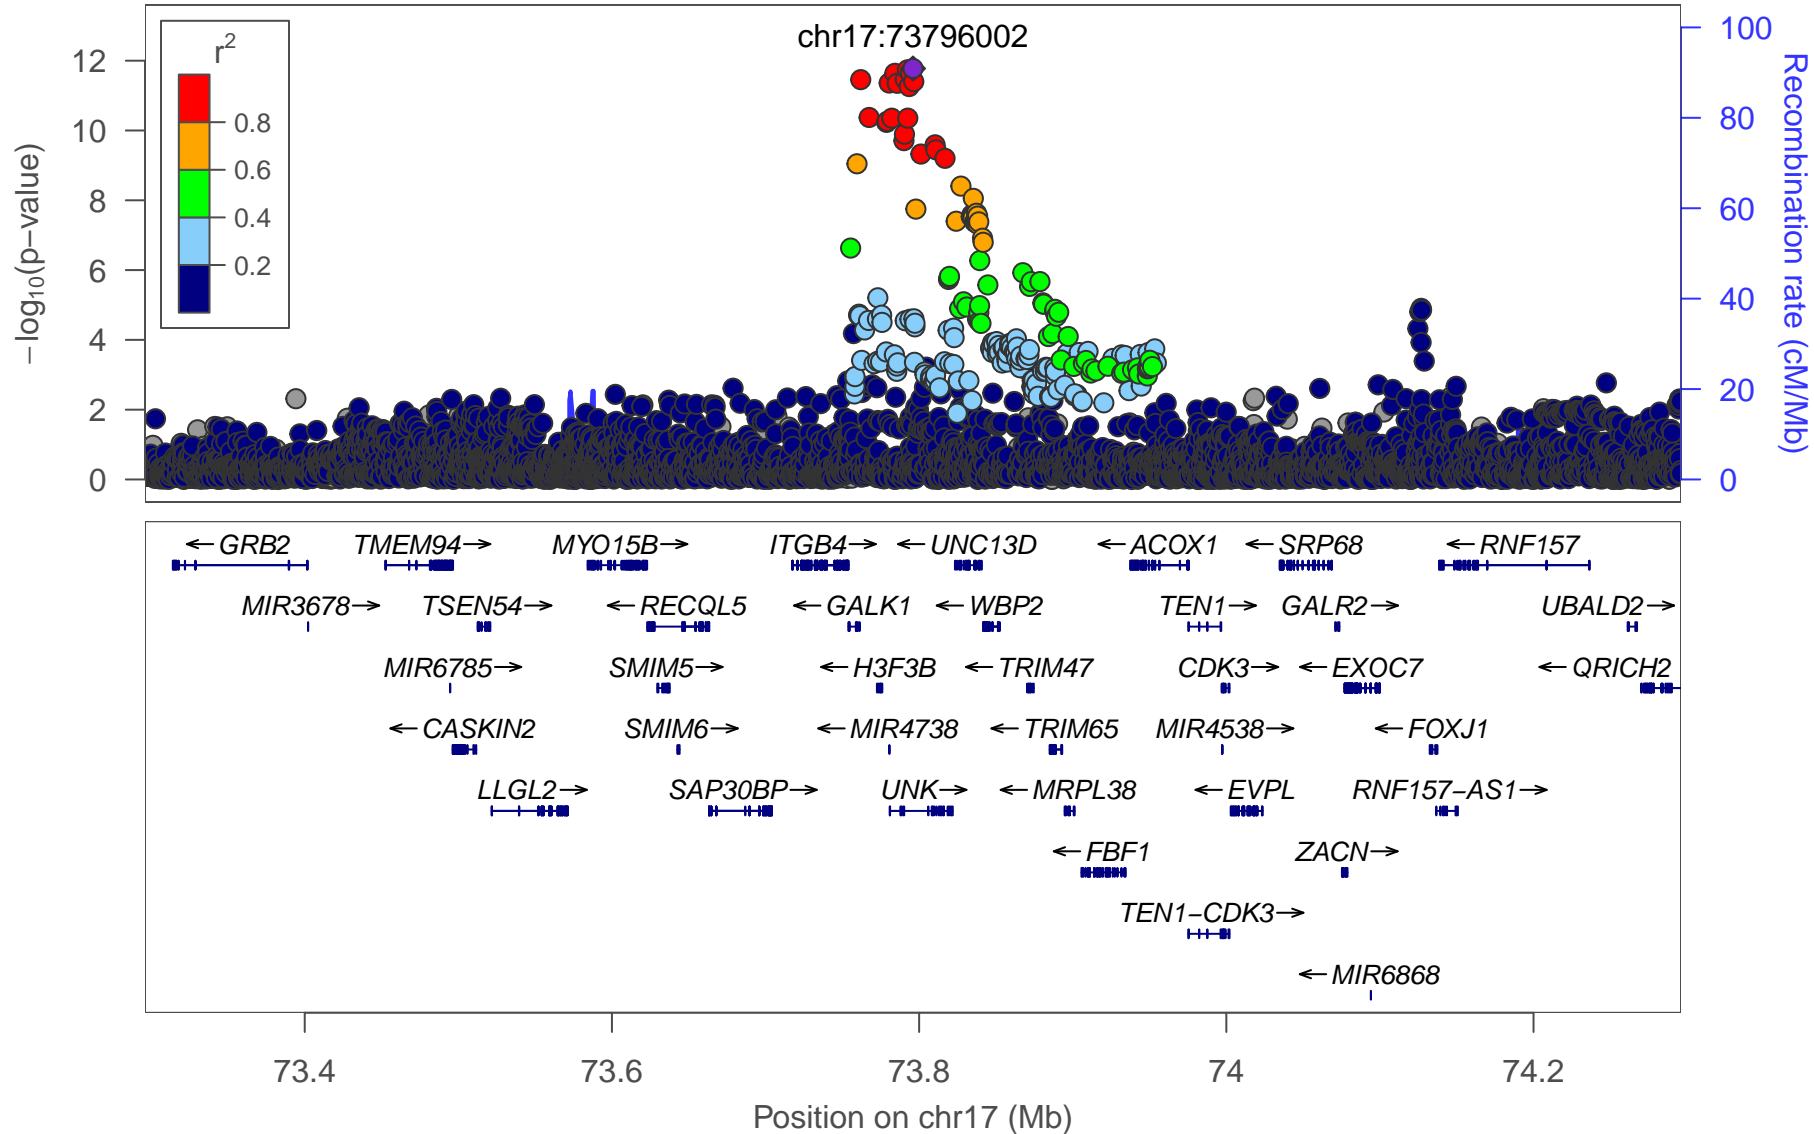

# 17\_15:S-VLDL-CE\_percent

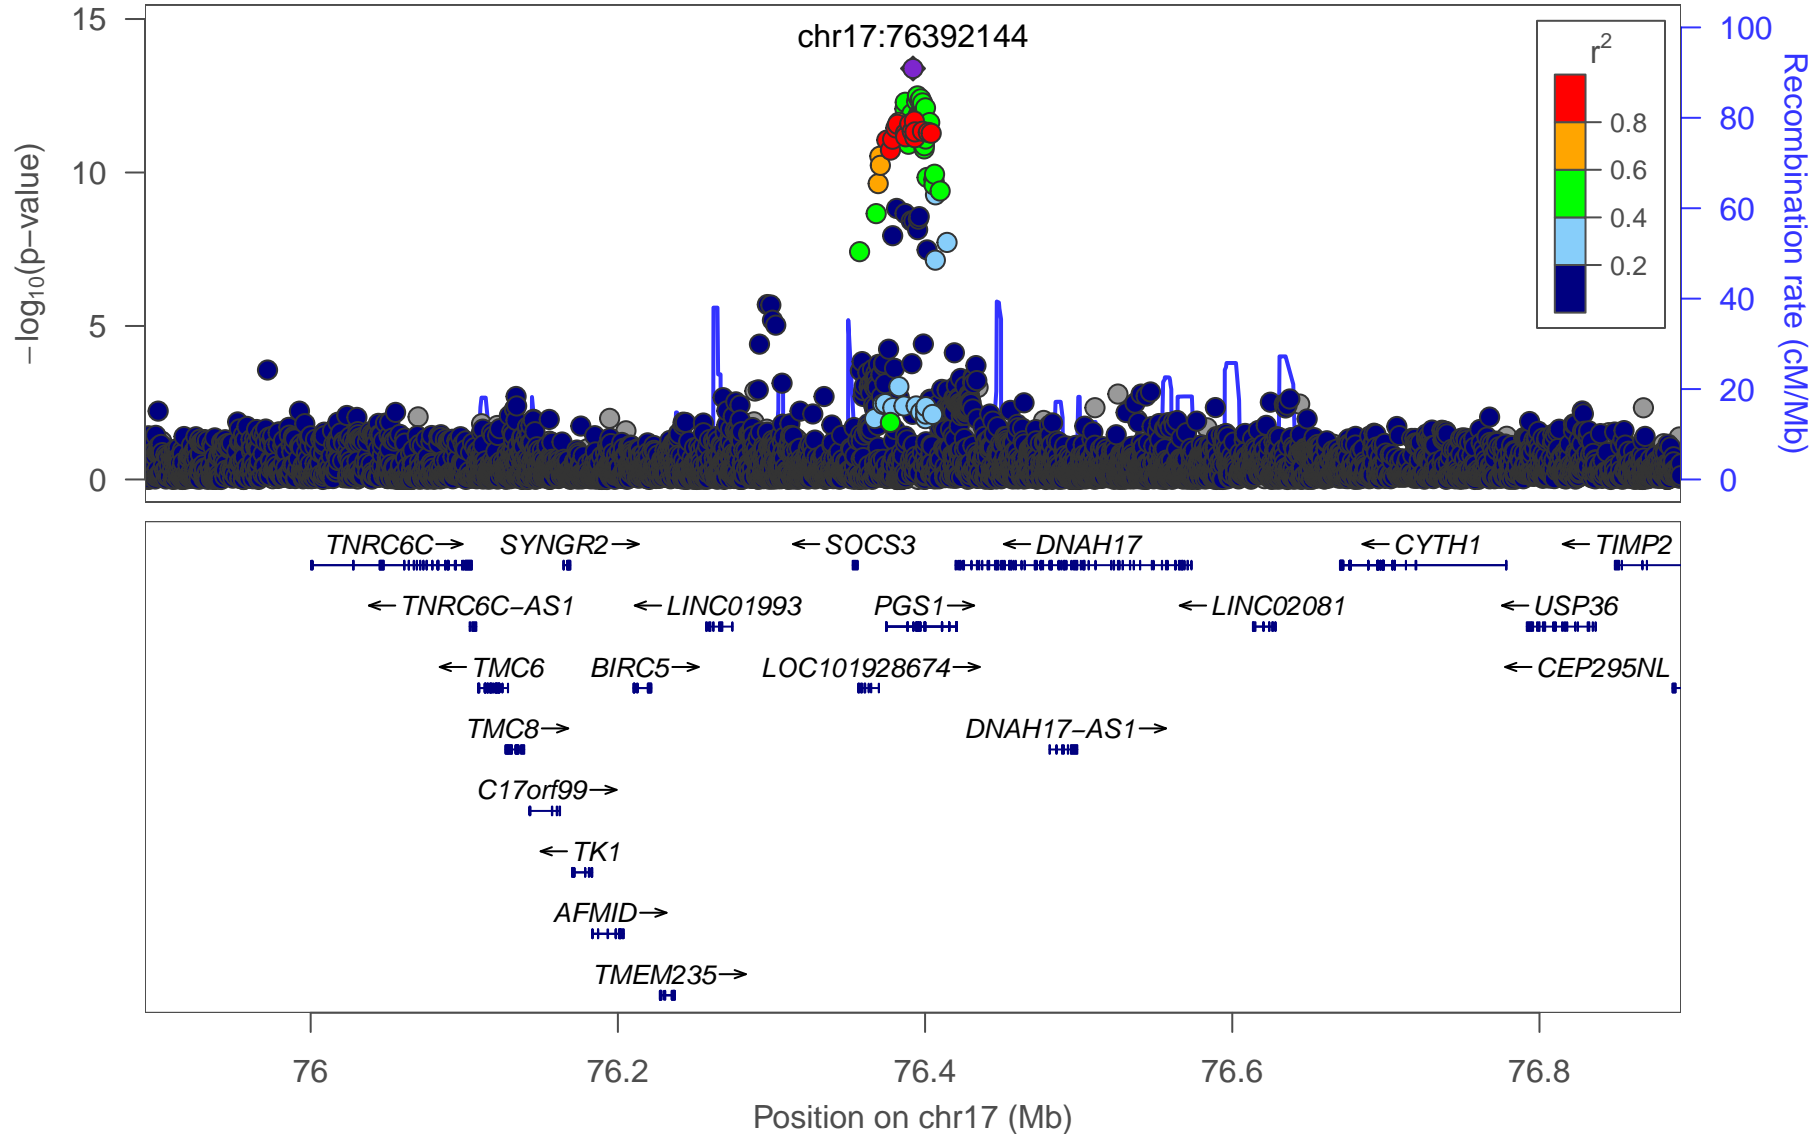

# 18\_1:S-VLDL-TG

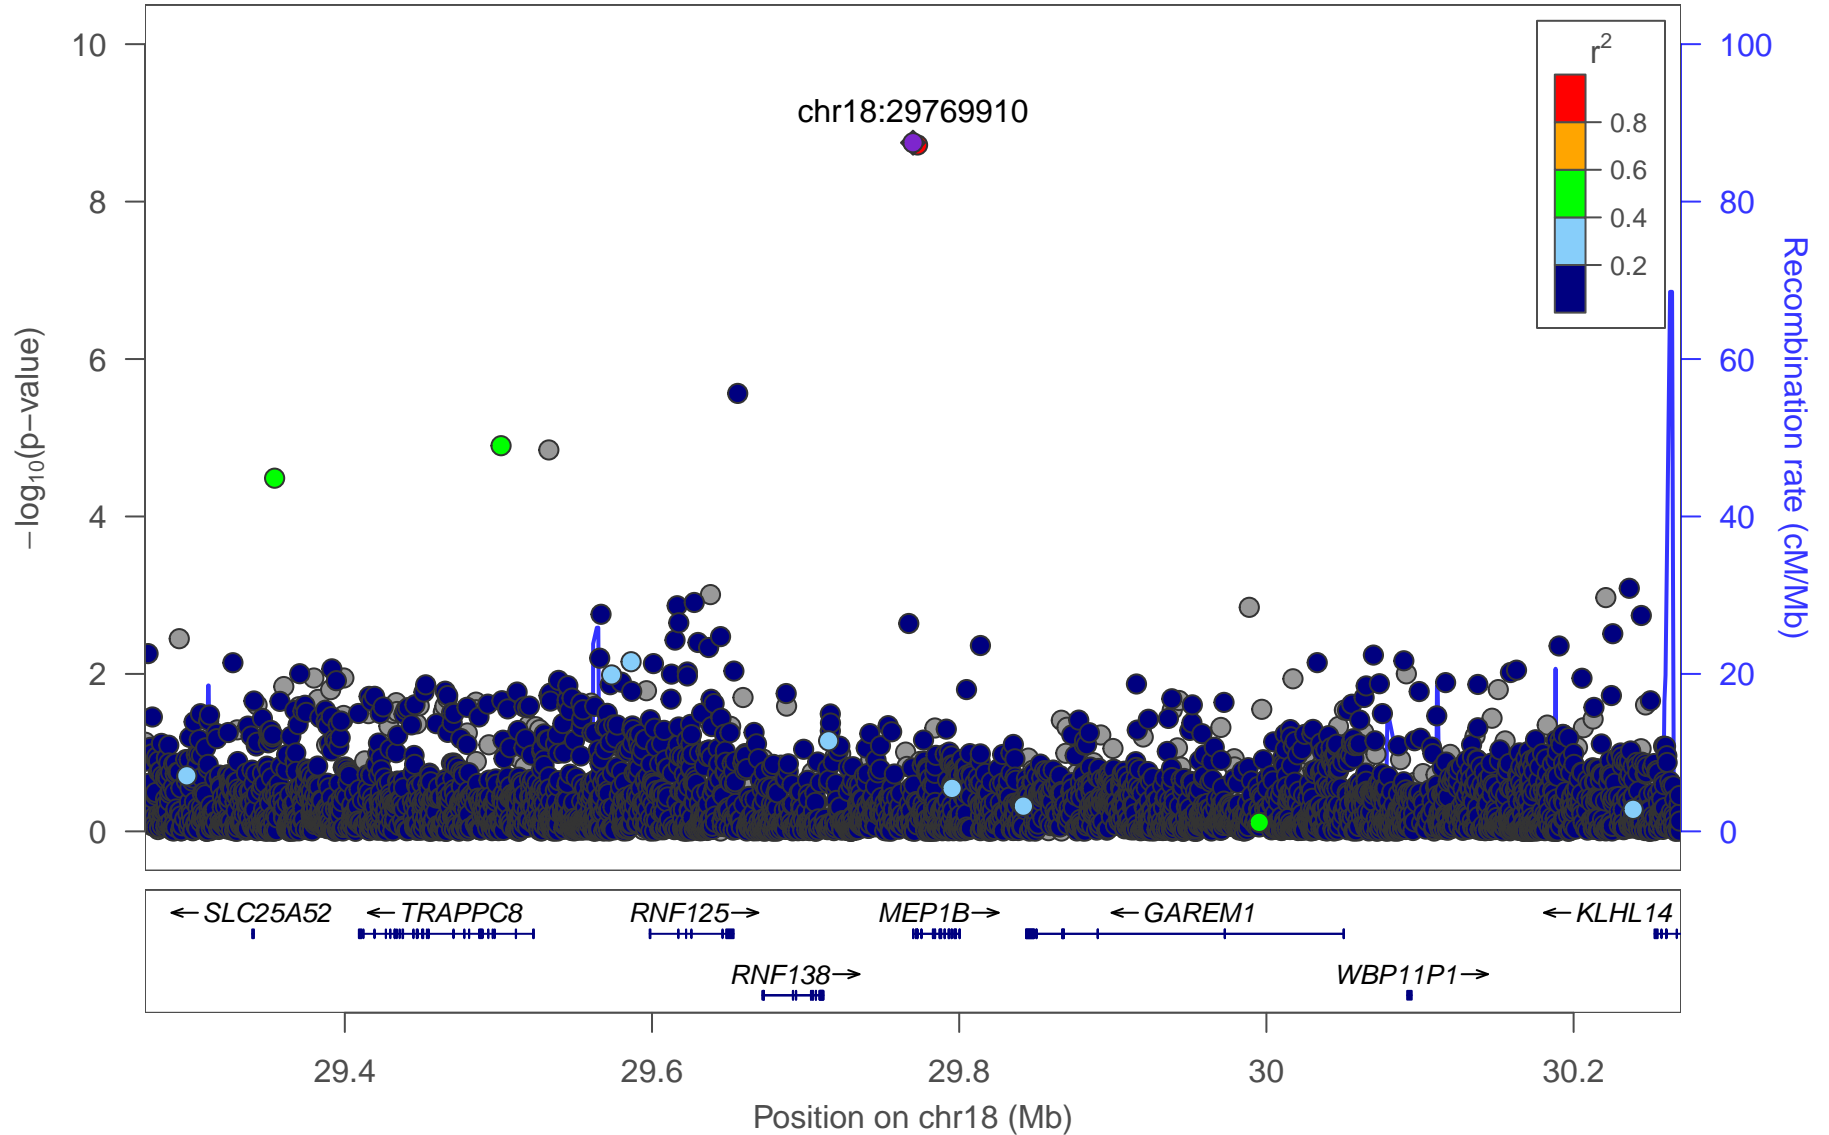

# 18\_2:M-HDL-PL

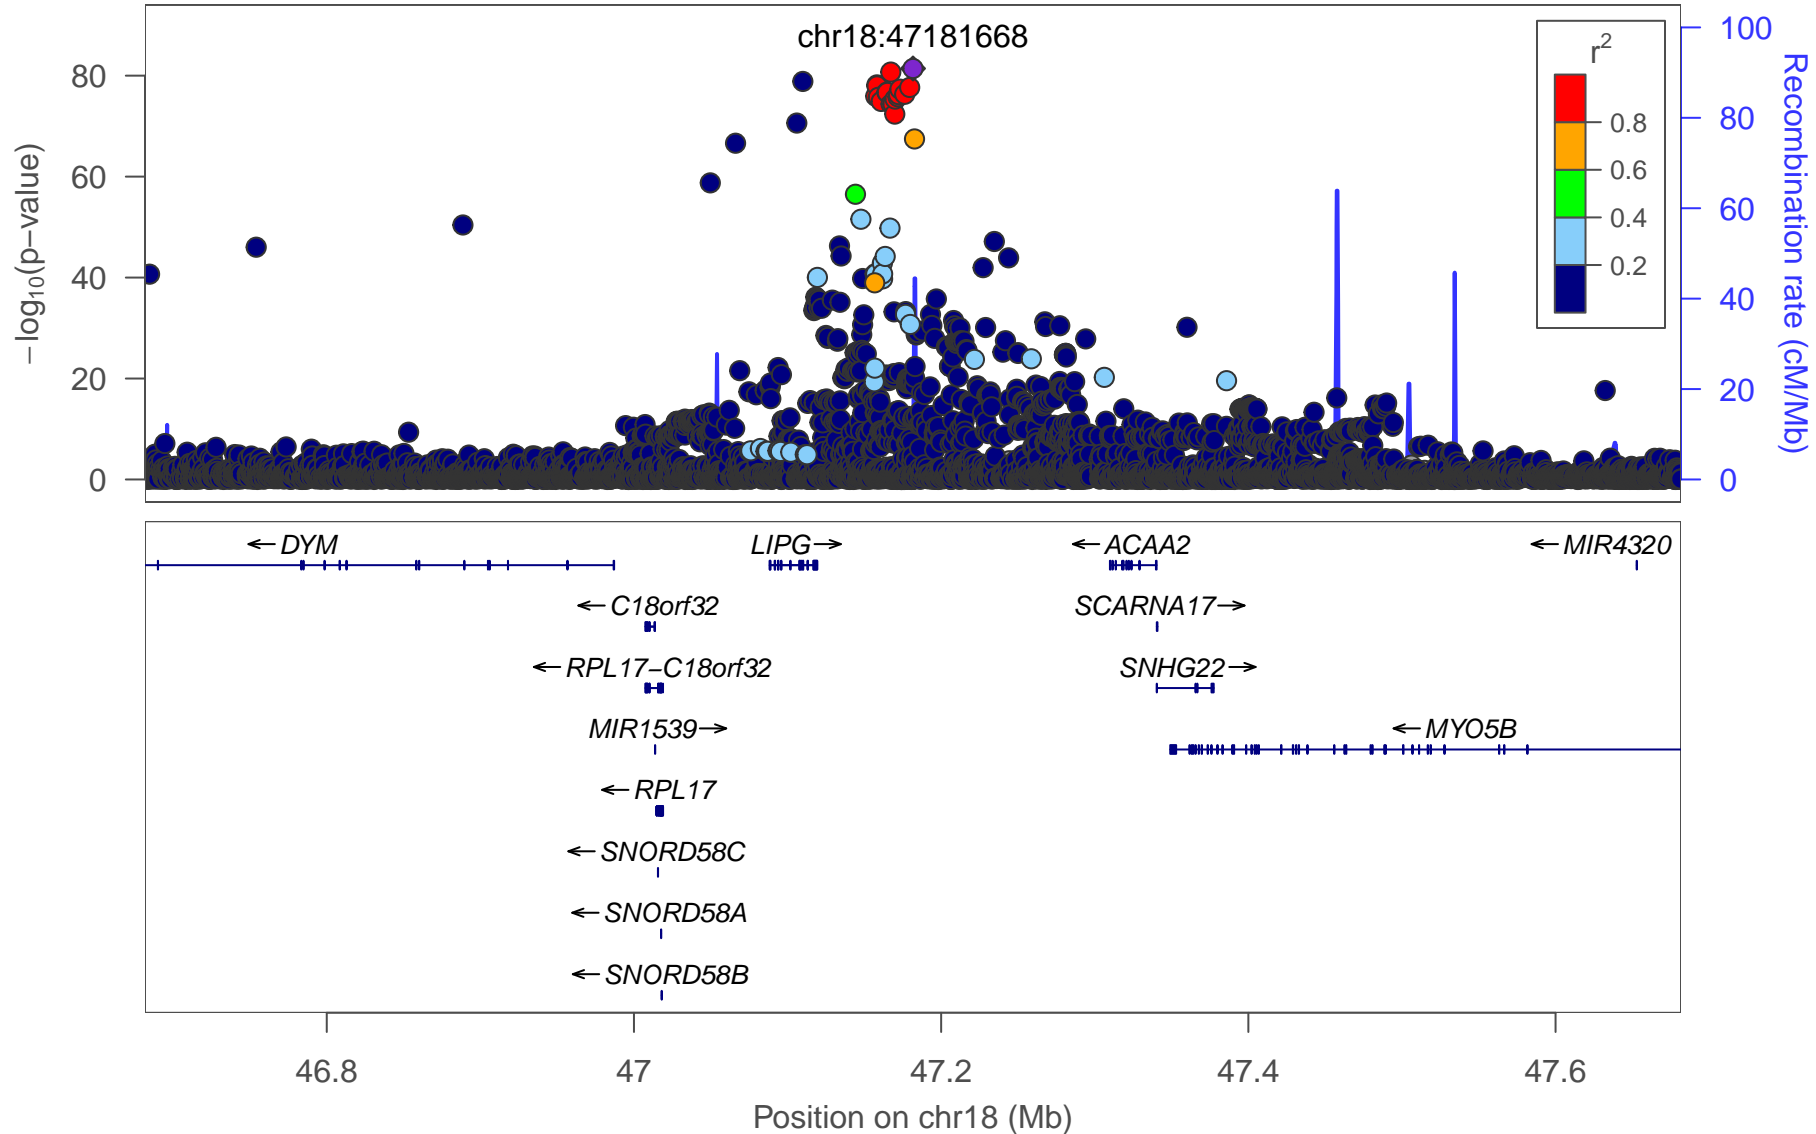

# 18\_3:L-HDL-FC

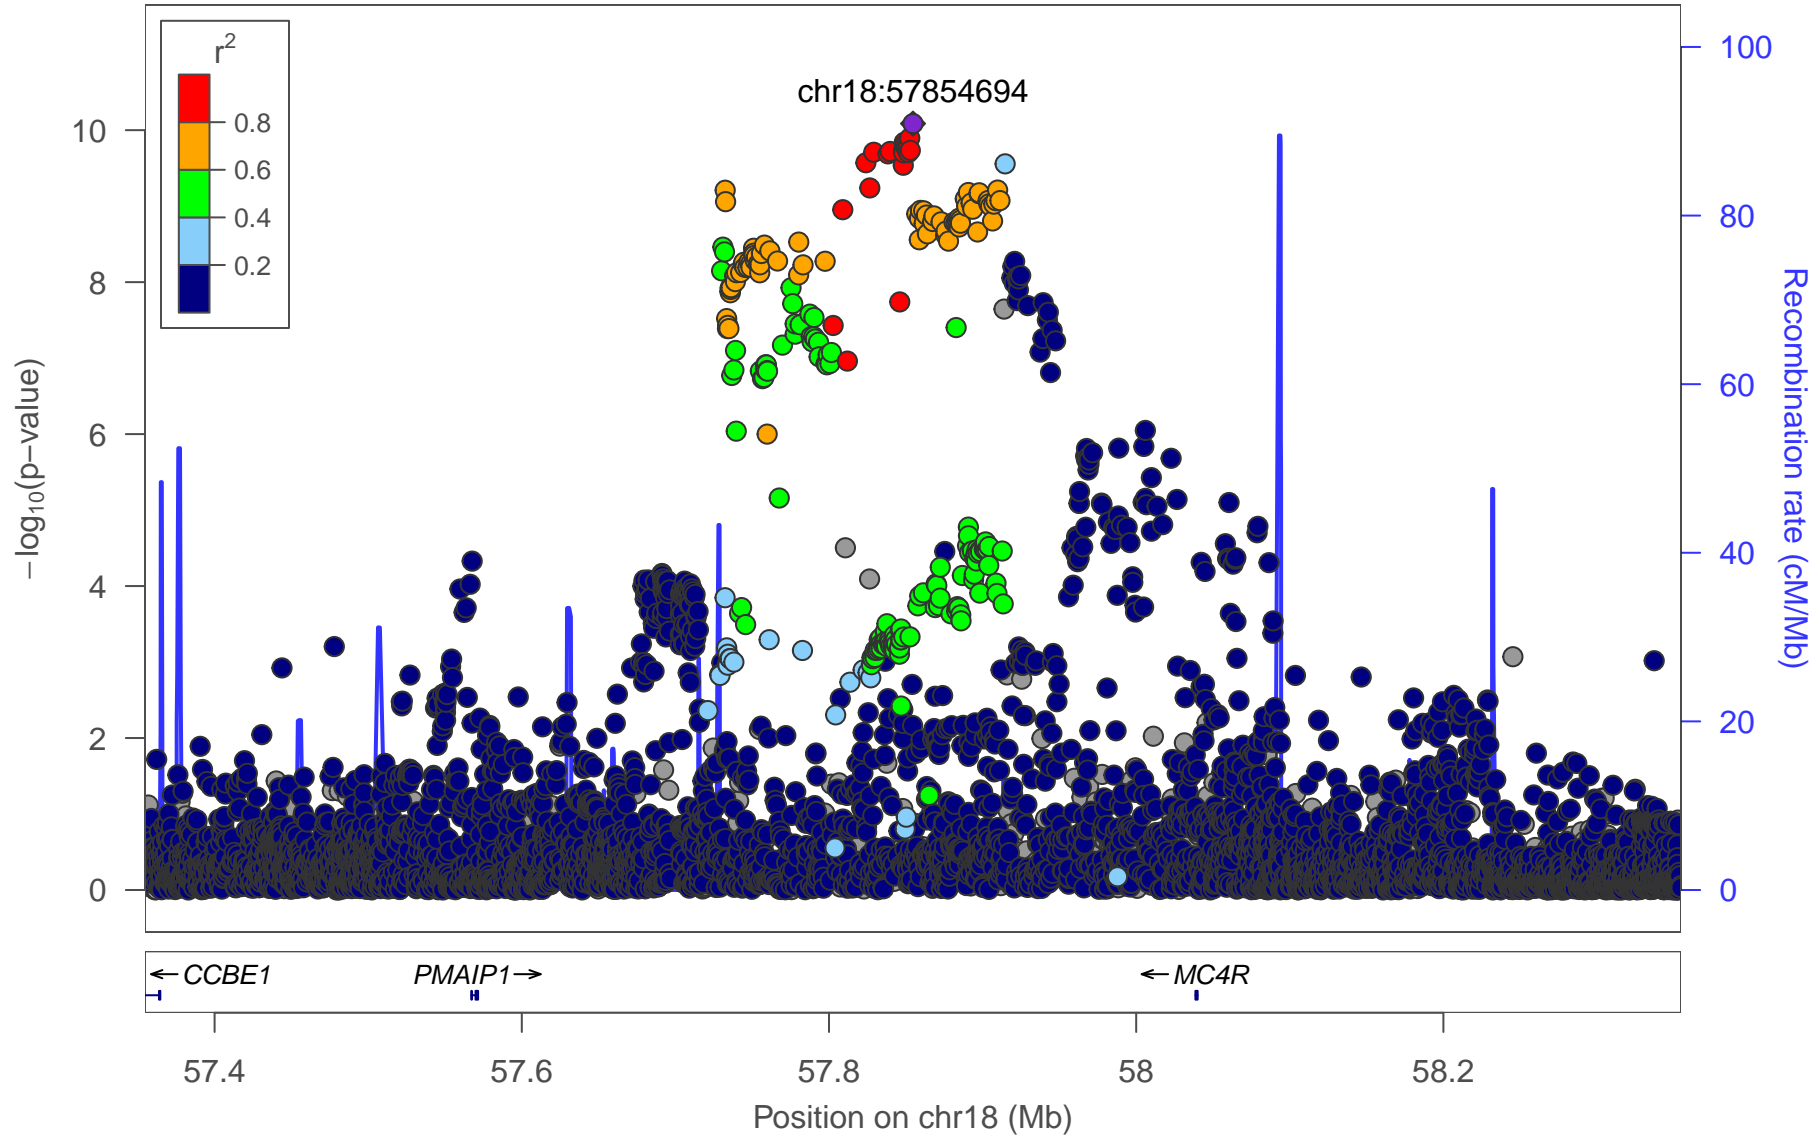

# 18\_4:Crea

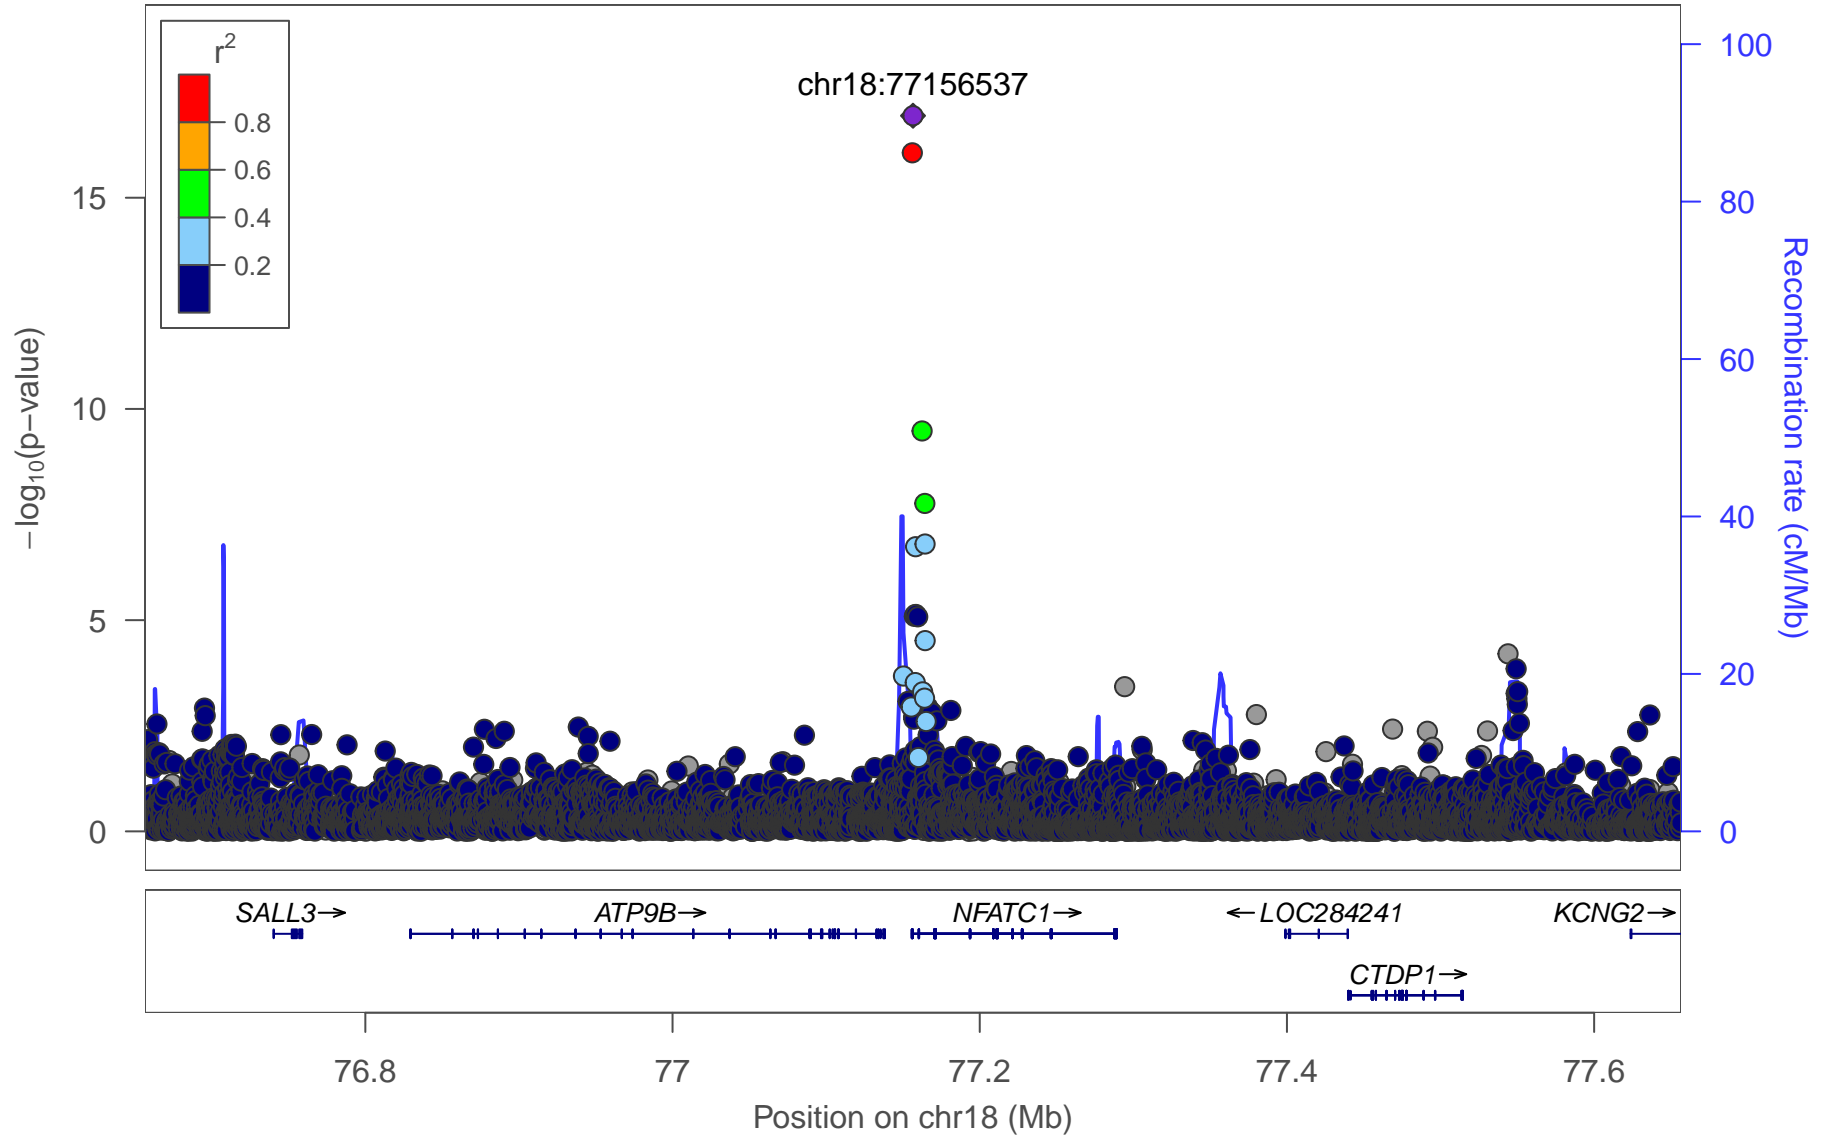

# 19\_1:L-VLDL-C\_percent

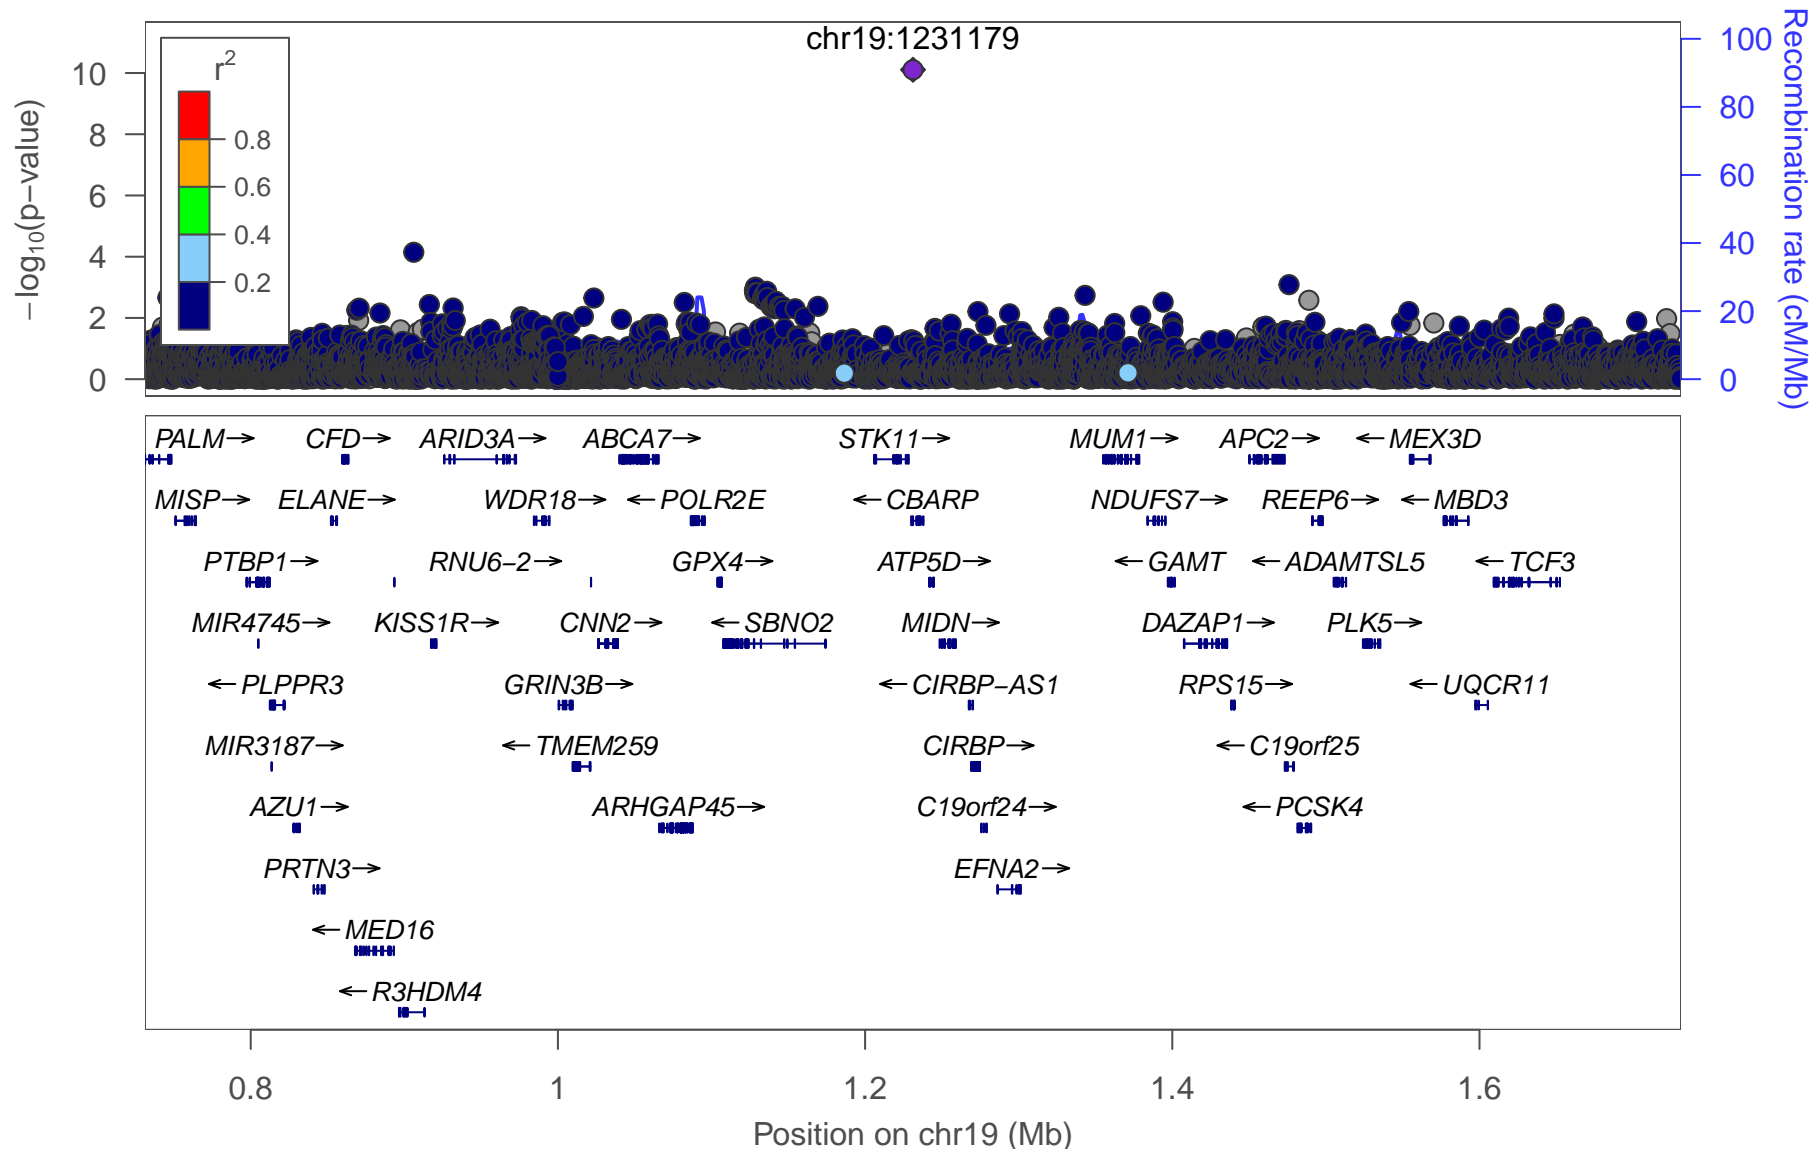

# 19\_2:LDL-D

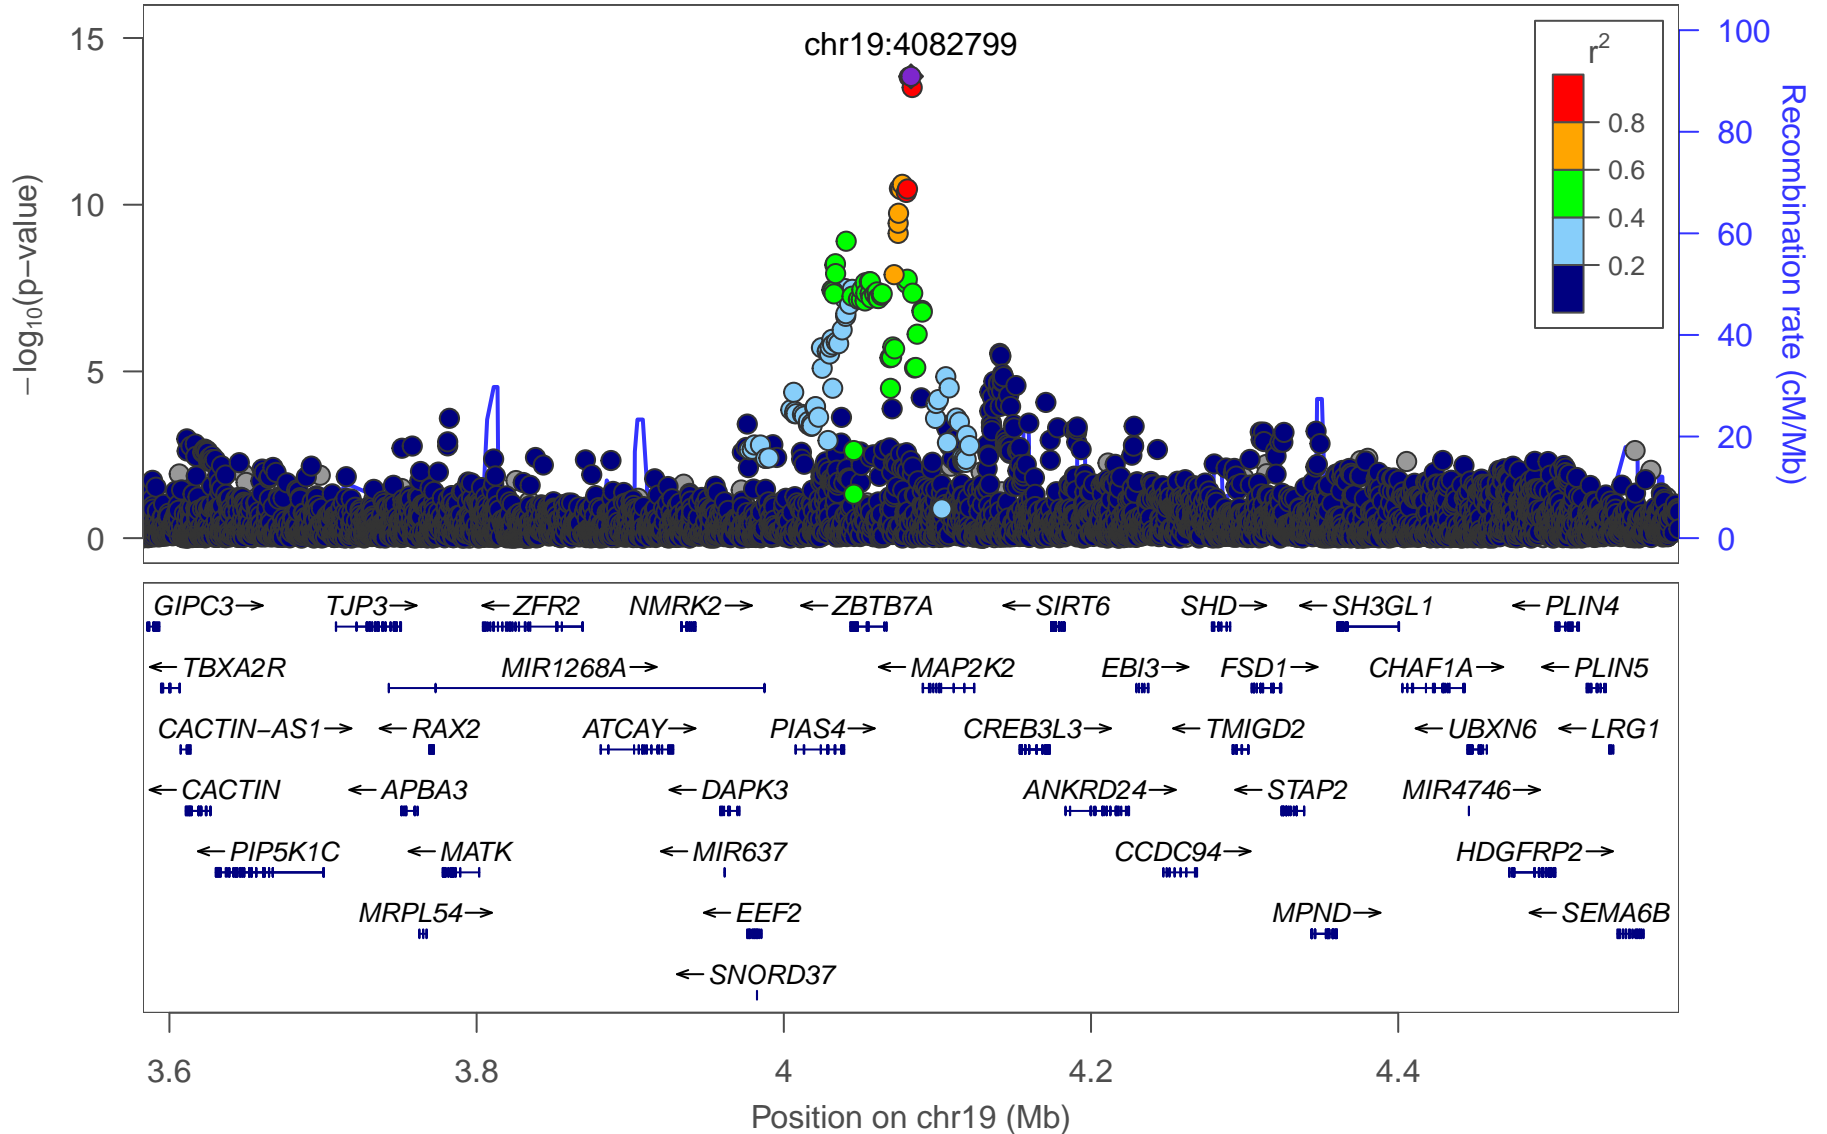



# 19\_3:Ile

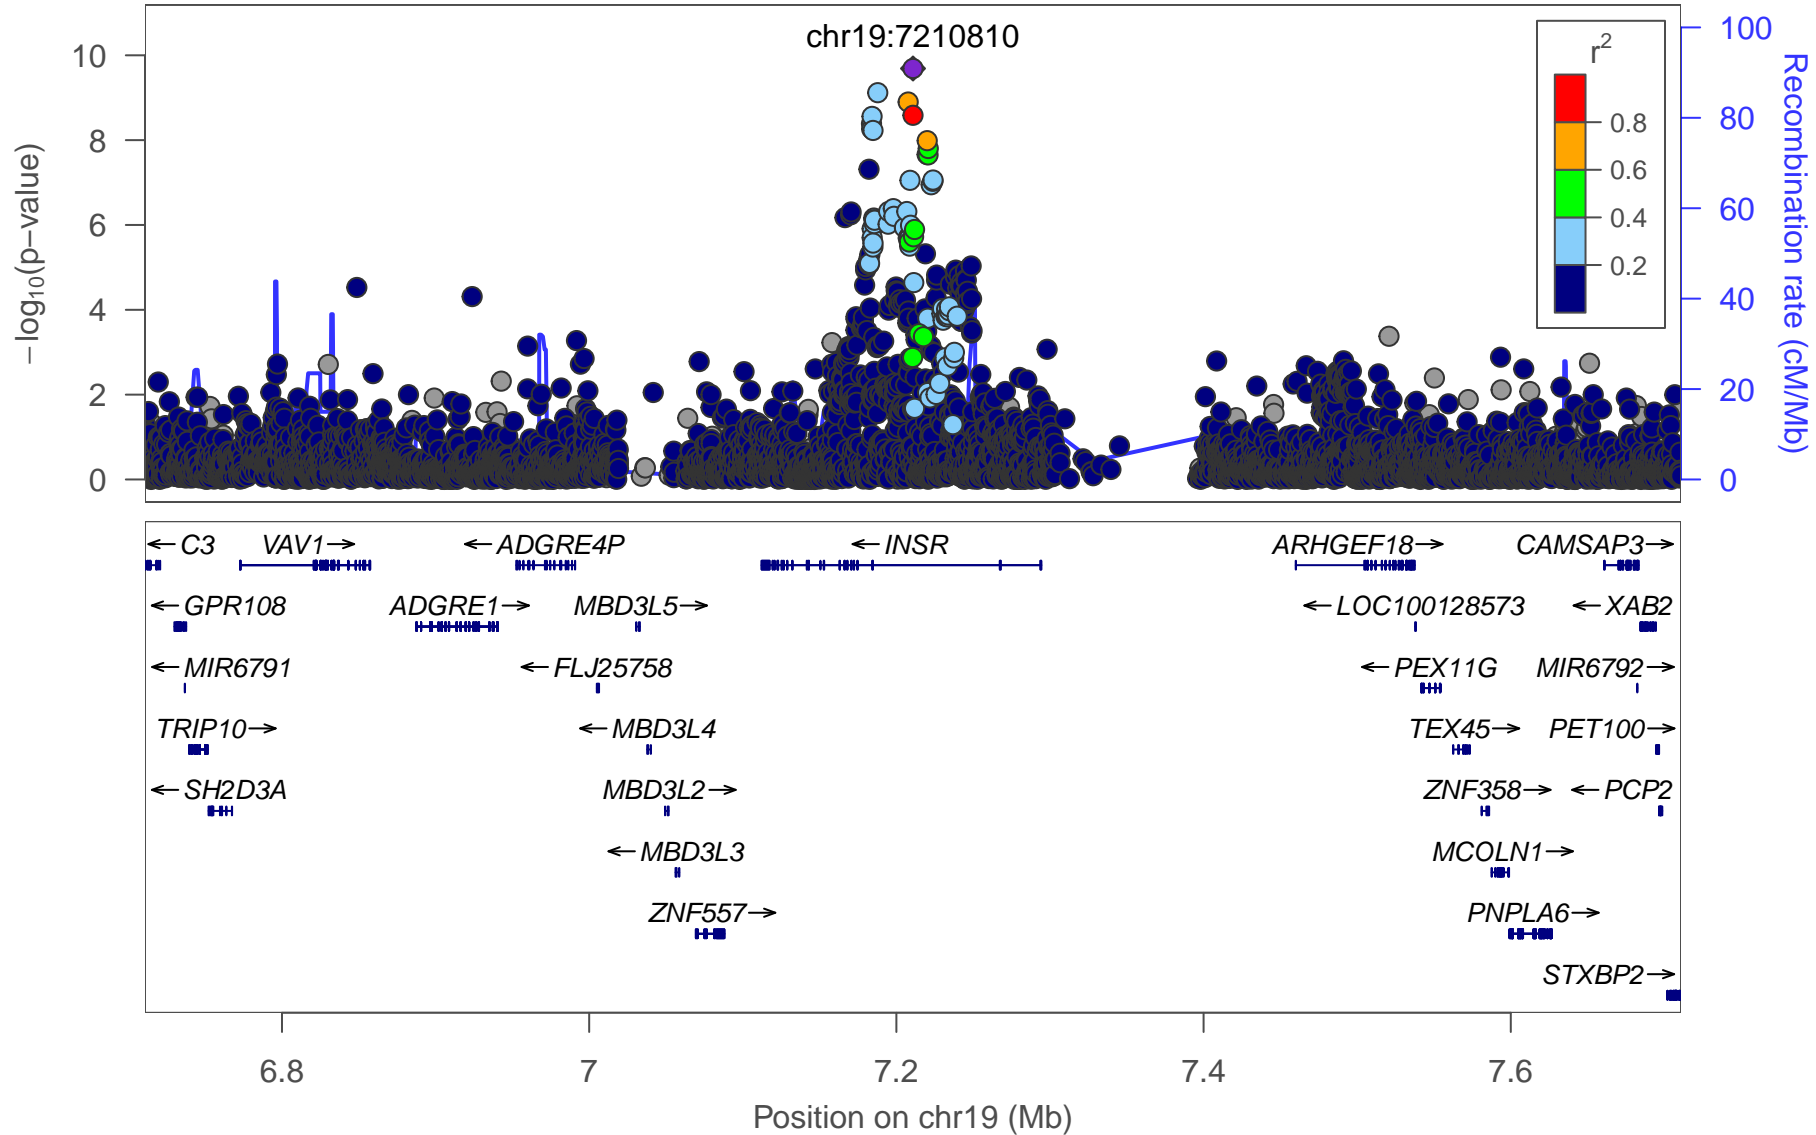

# 19\_4:S-VLDL-TG

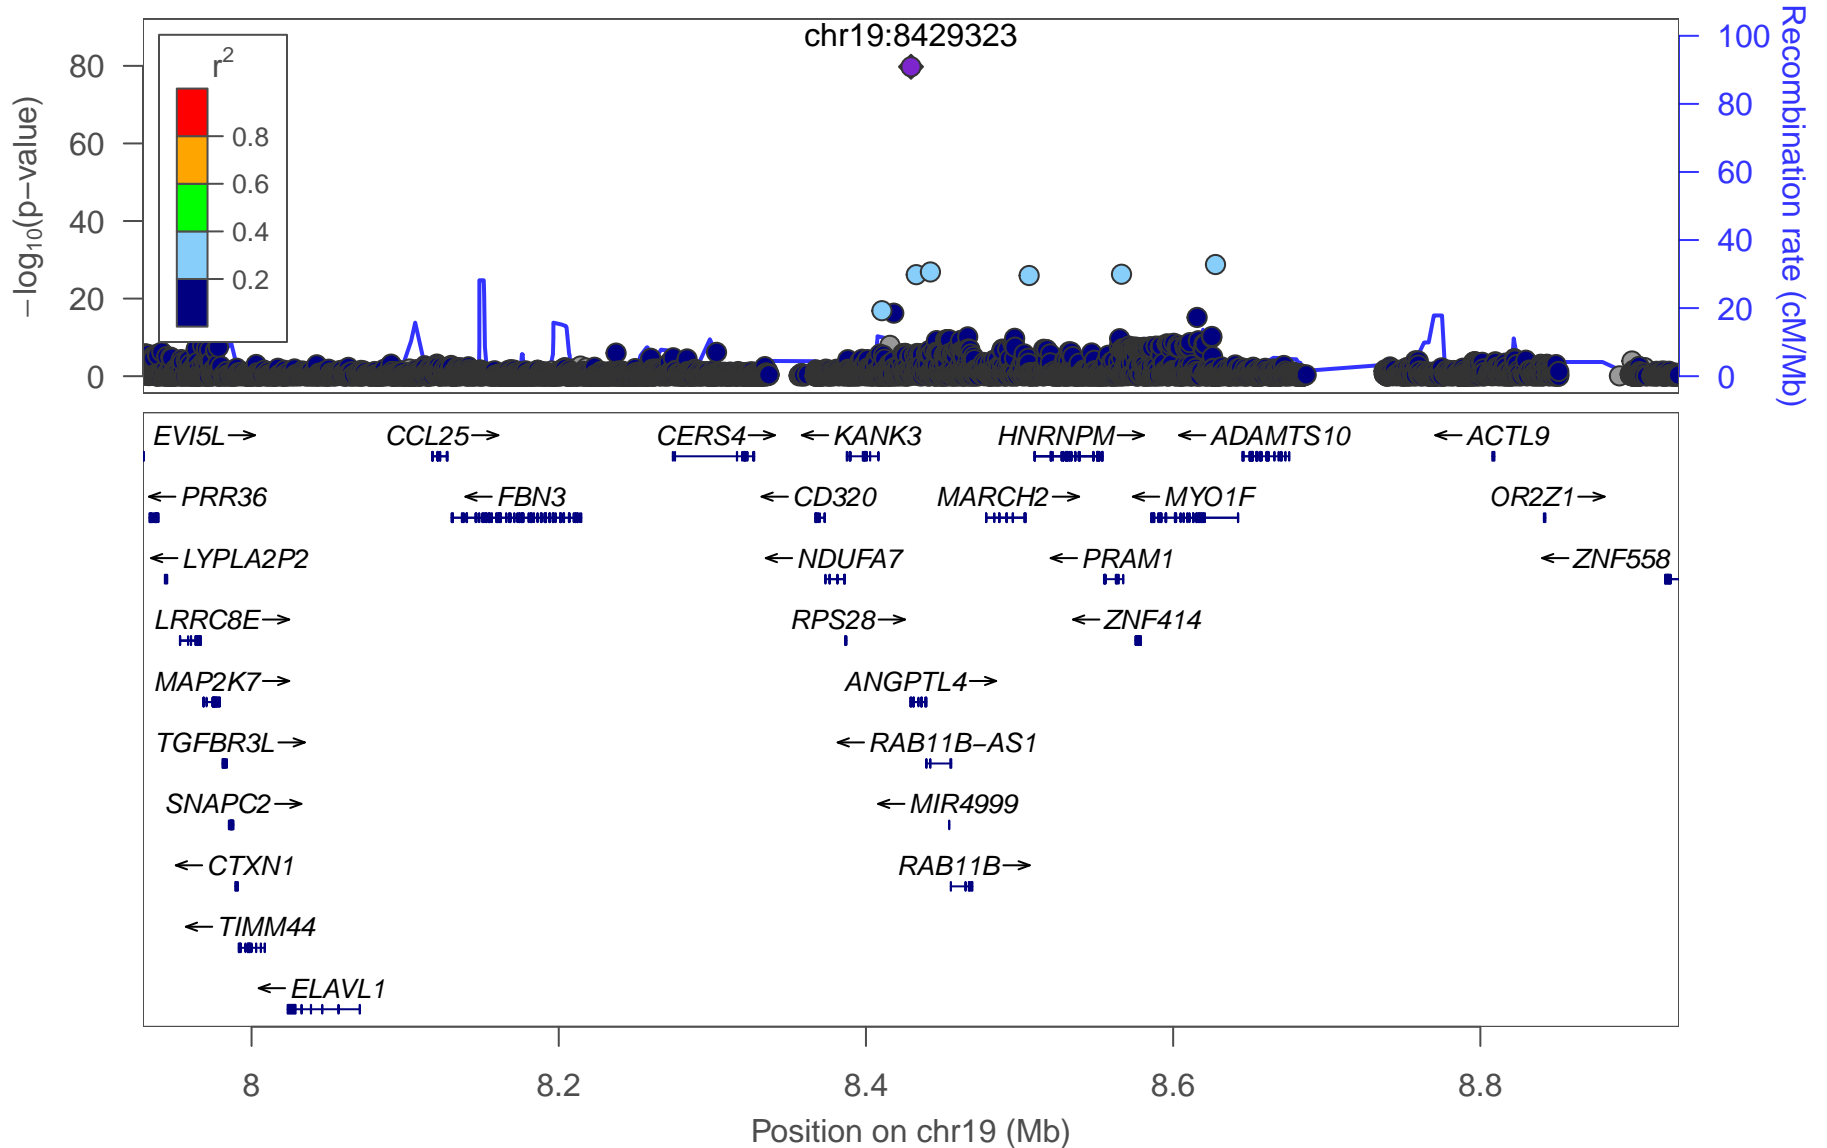

# 19\_5:L-LDL-C

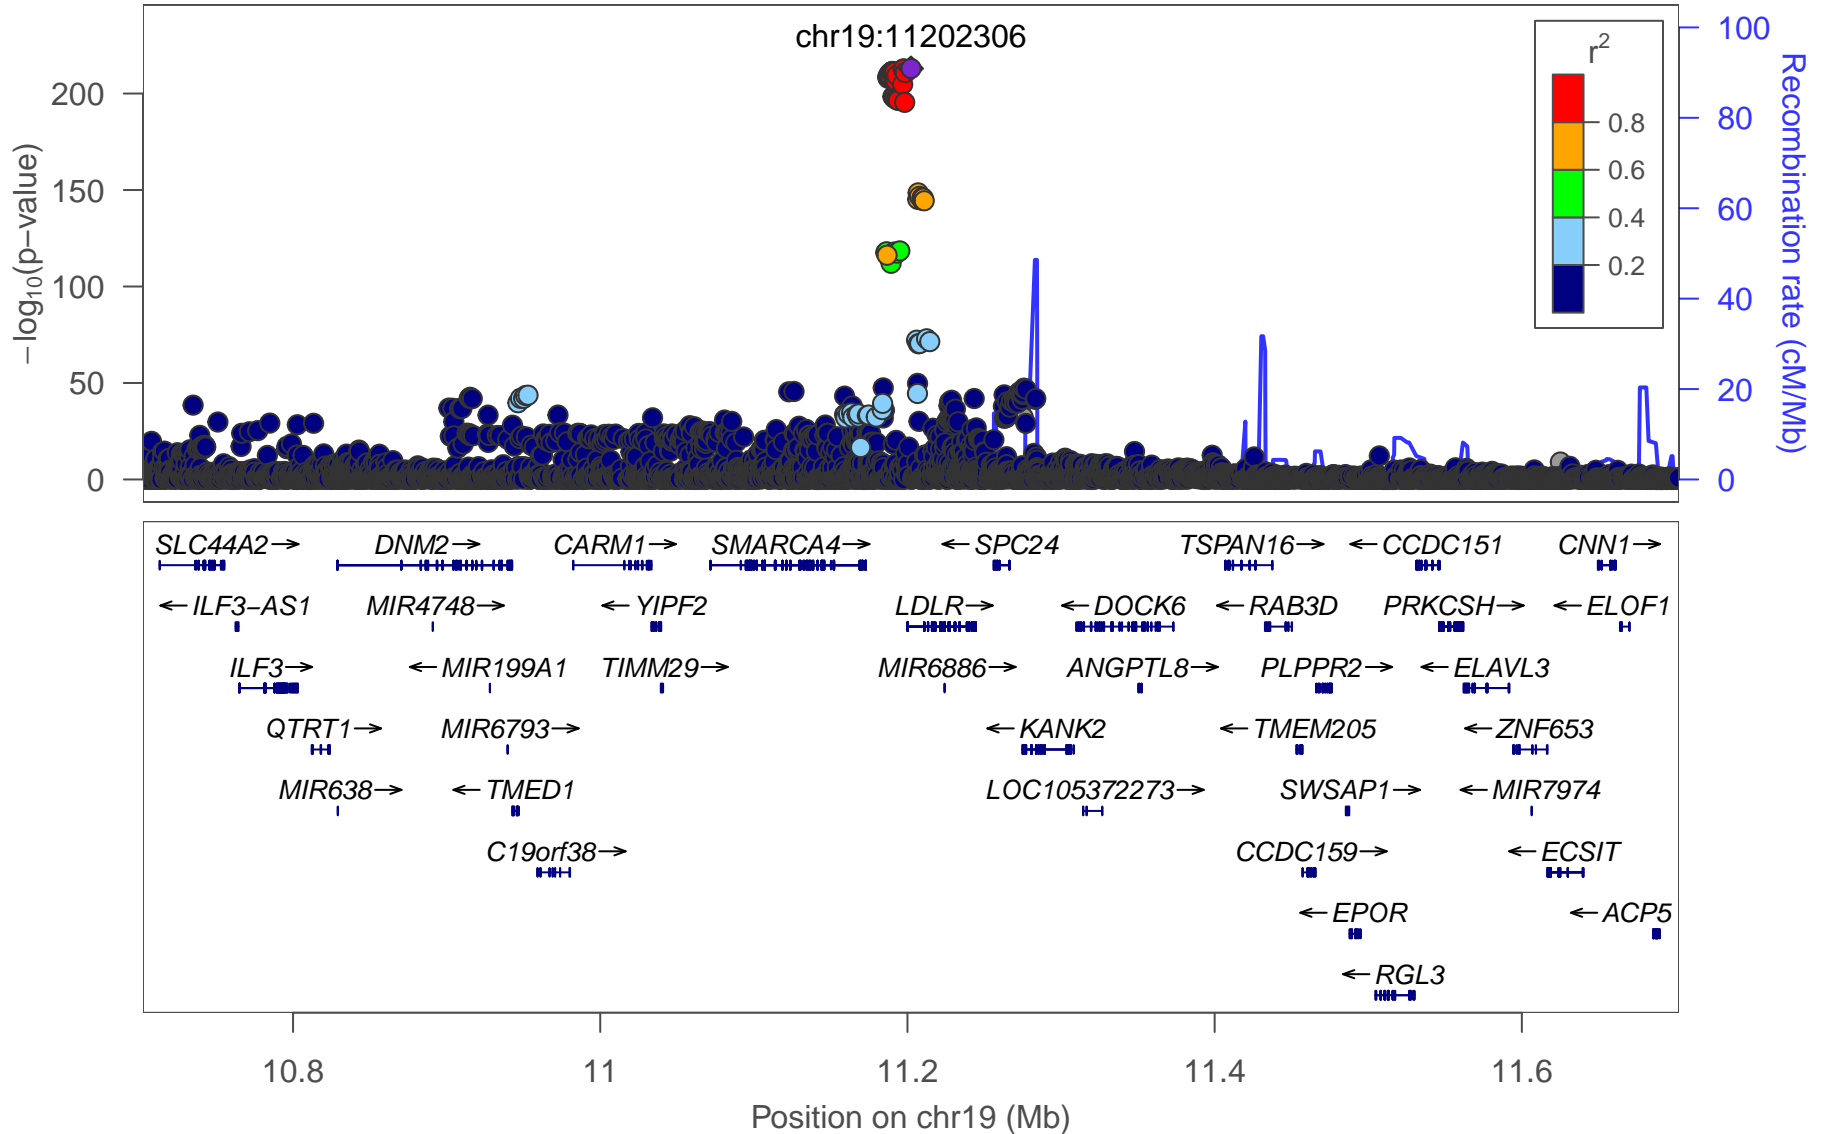

# 19\_6:M-VLDL-CE

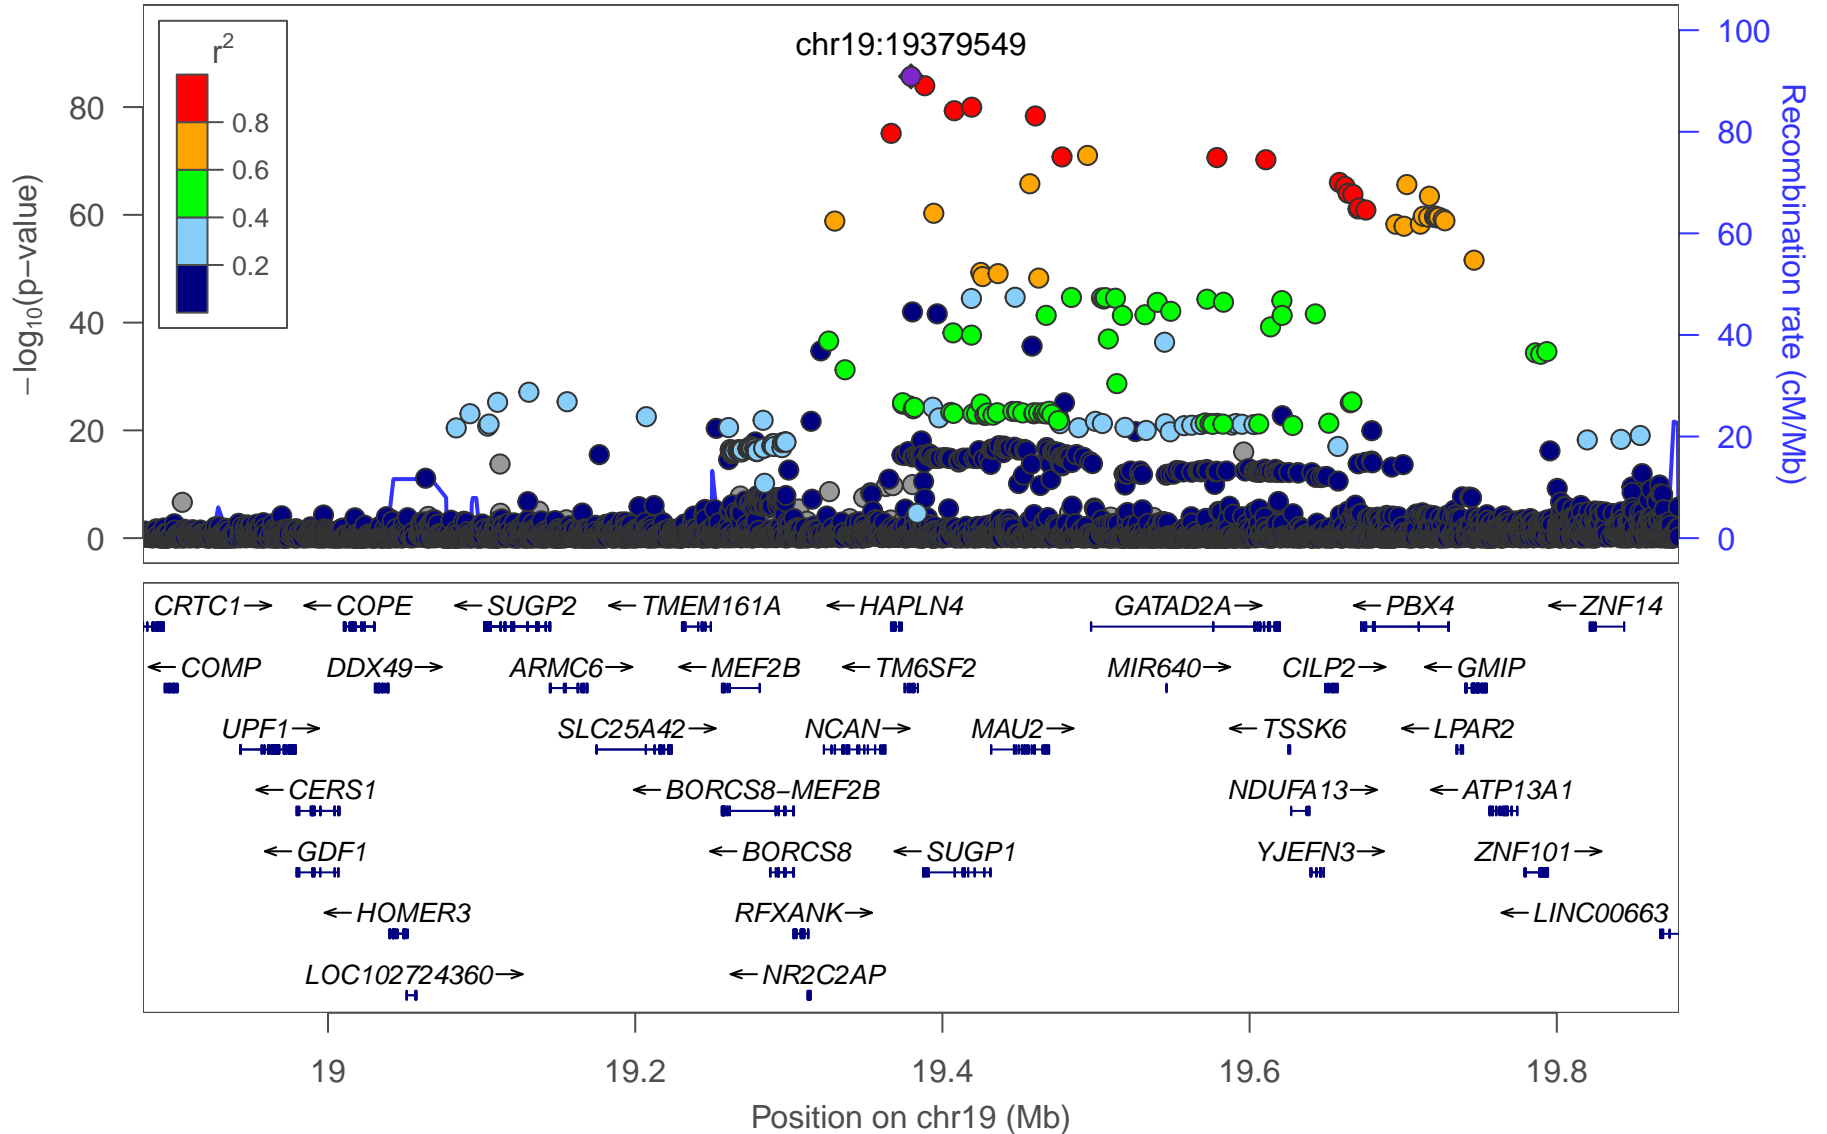

# 19\_7:Crea

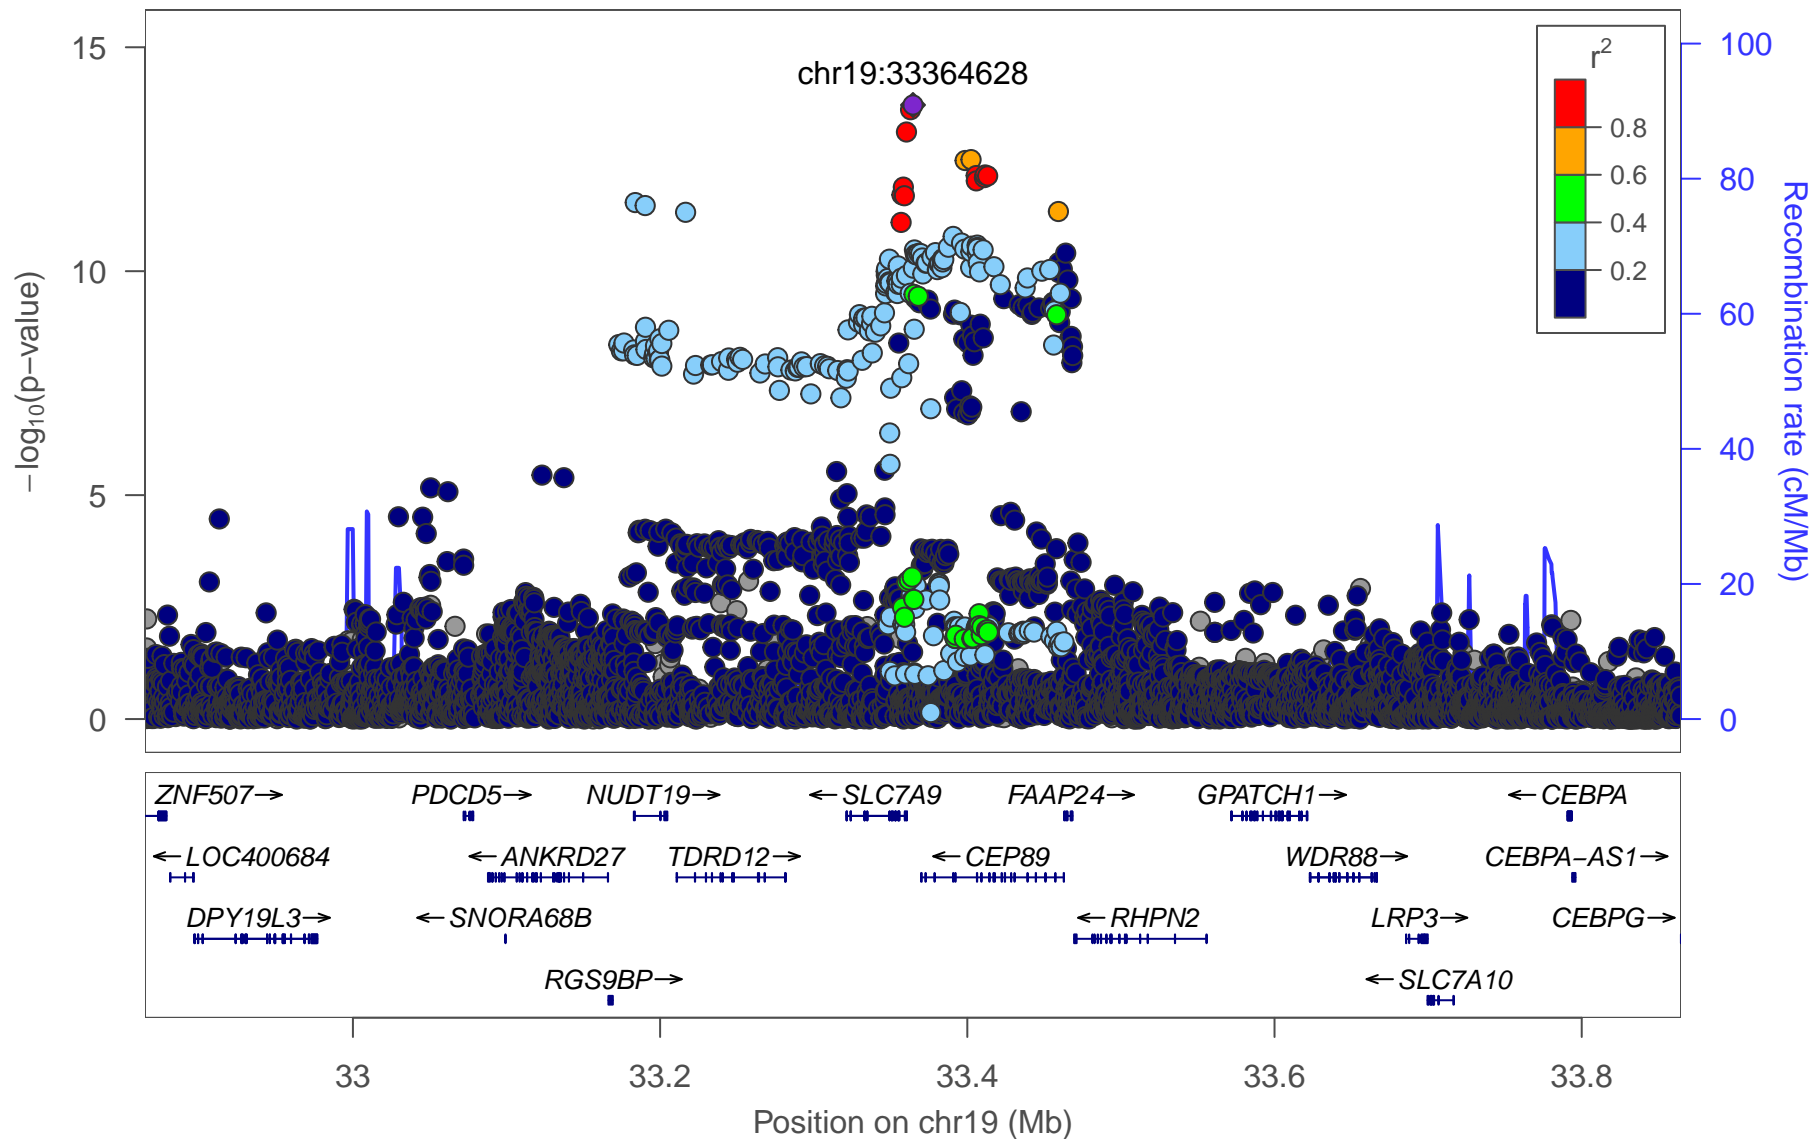

# 19\_8:Alb

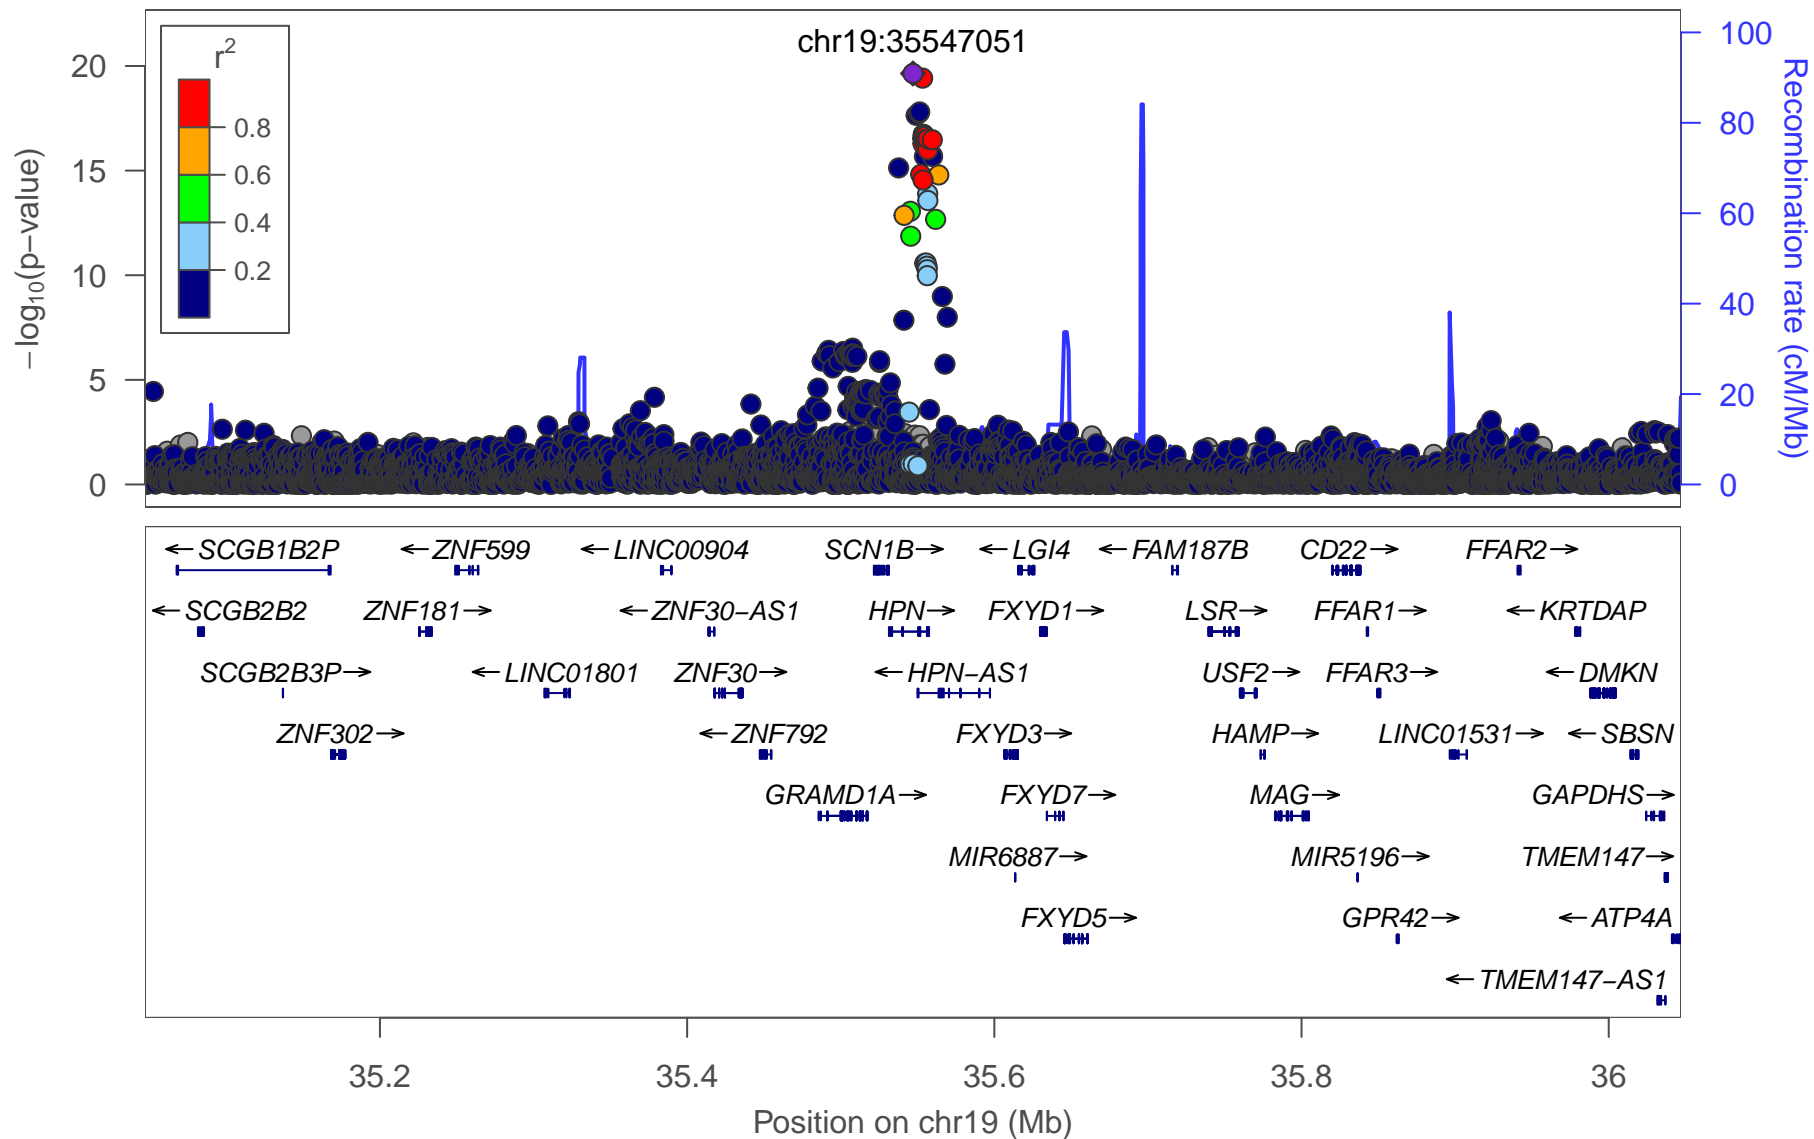

# 19\_9:Crea

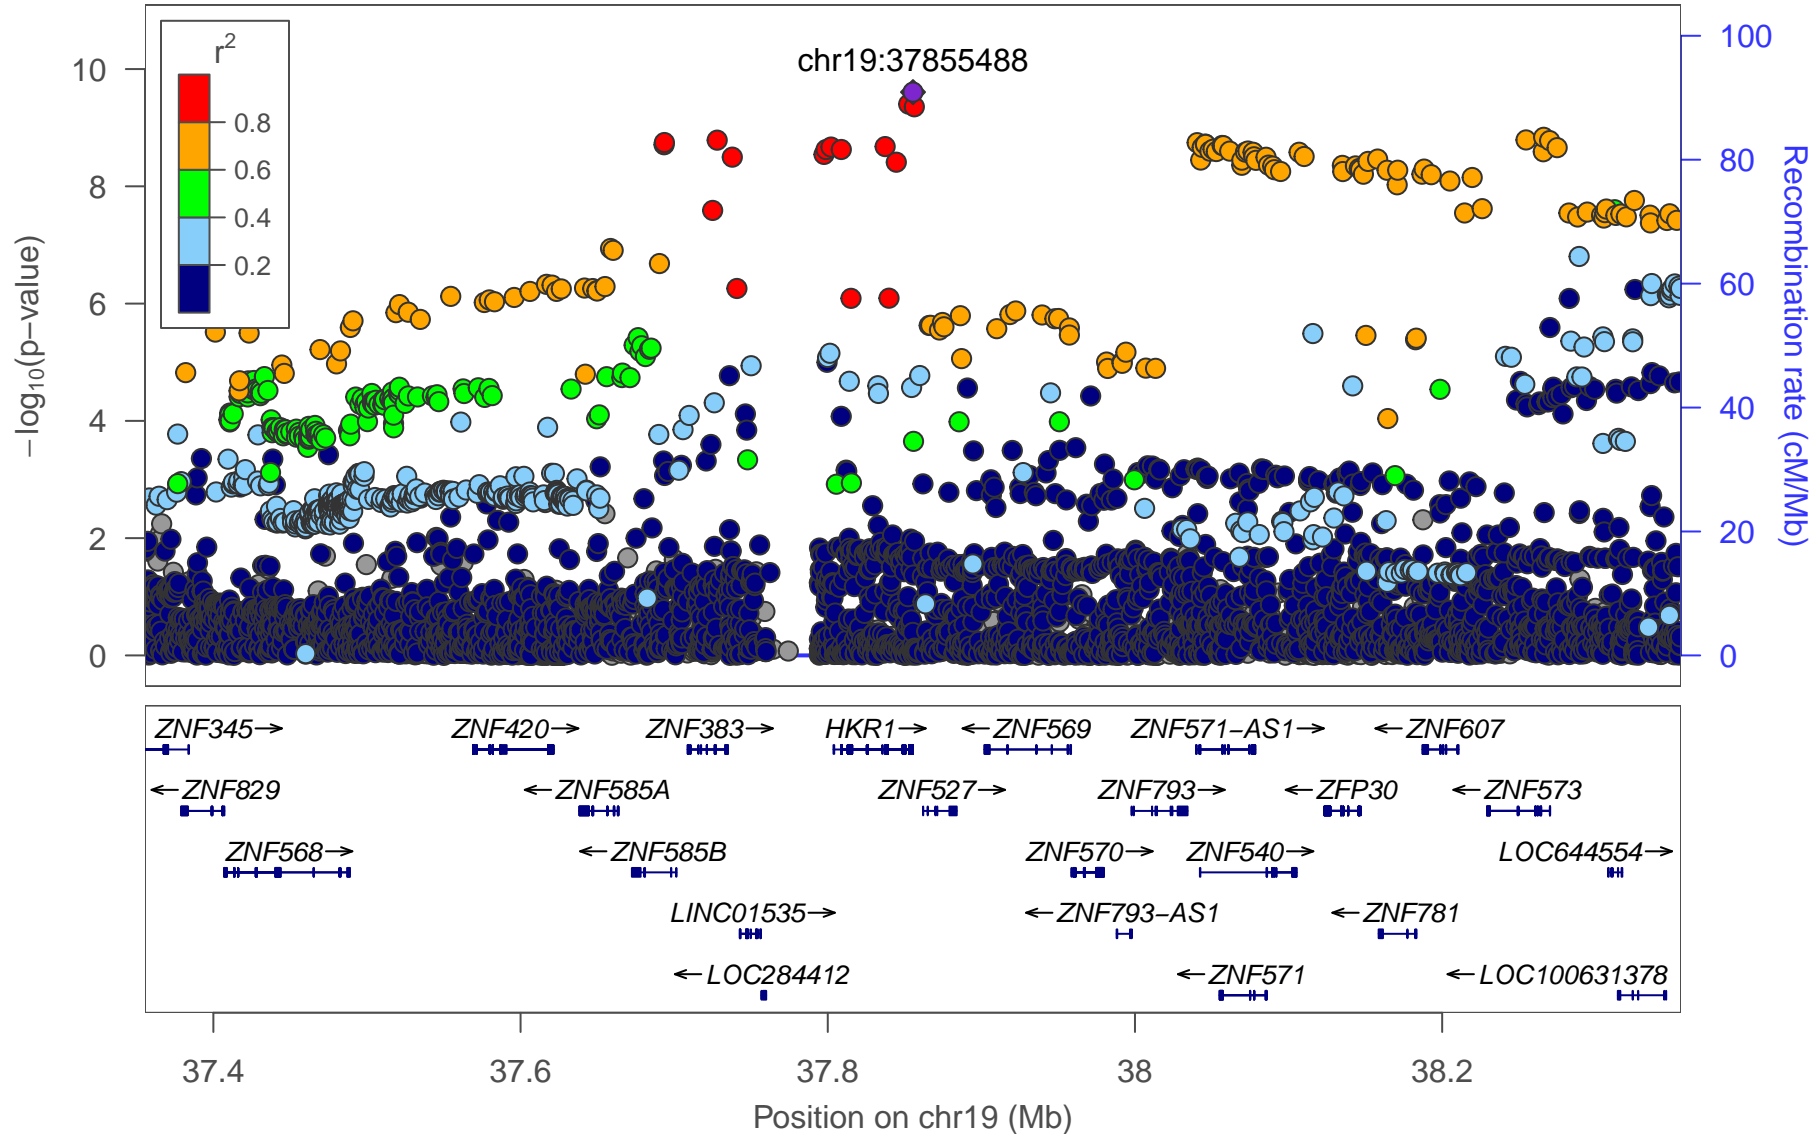

# 19\_10:L-LDL-C\_percent

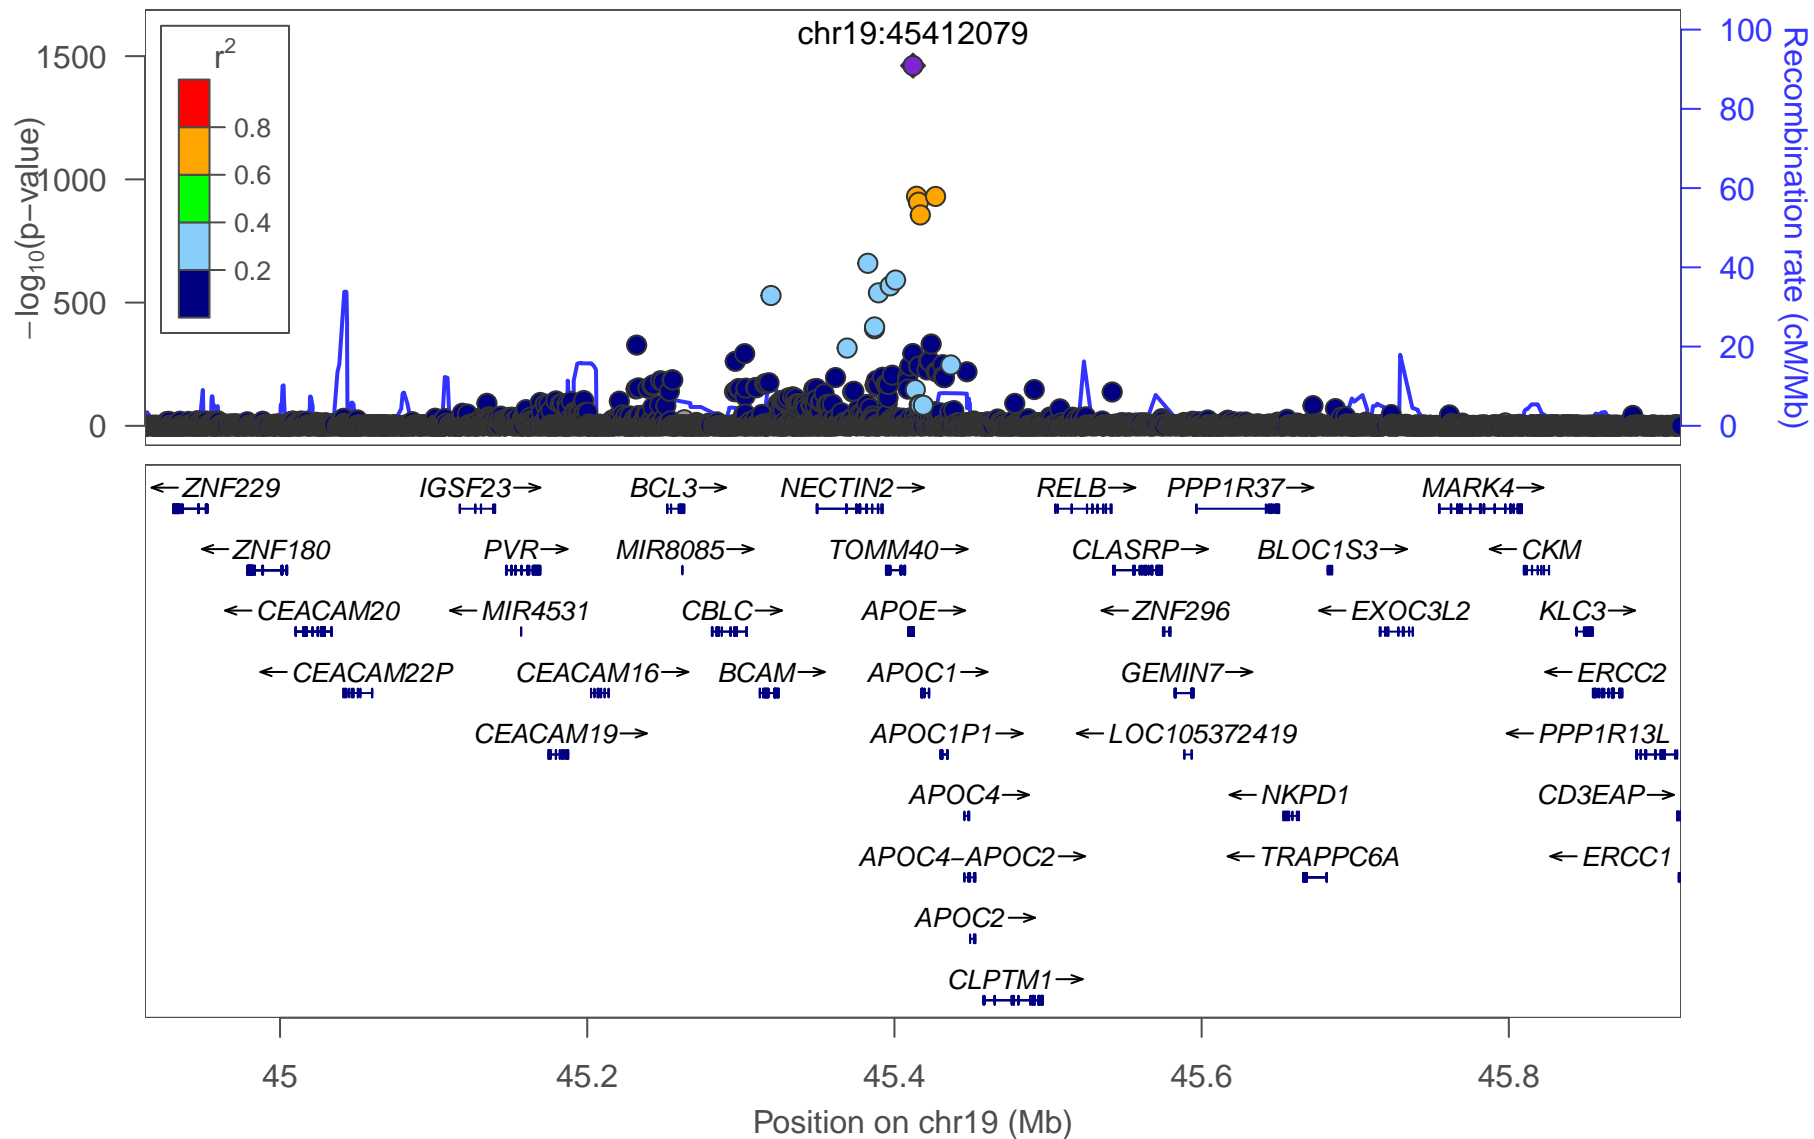



# 19\_11:Val

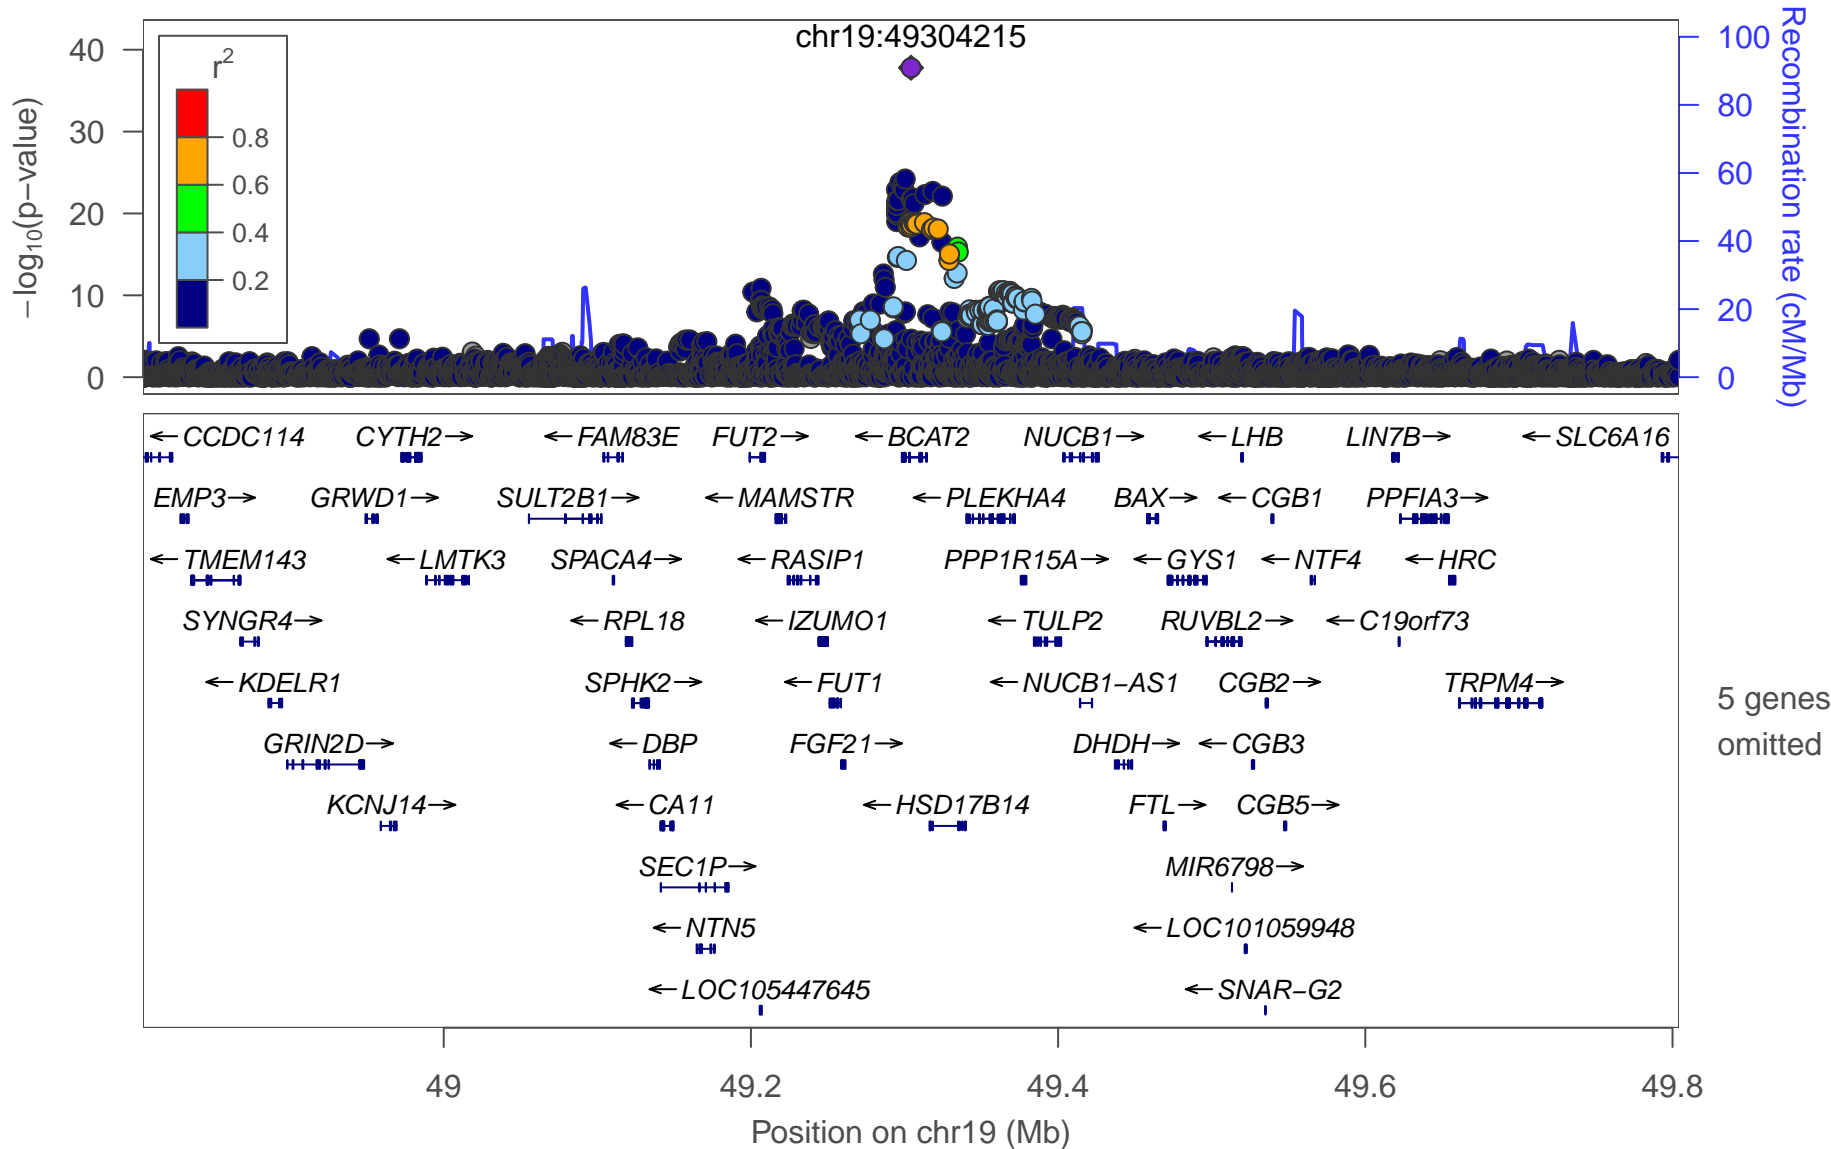

# 19\_12:M-HDL-PL\_percent

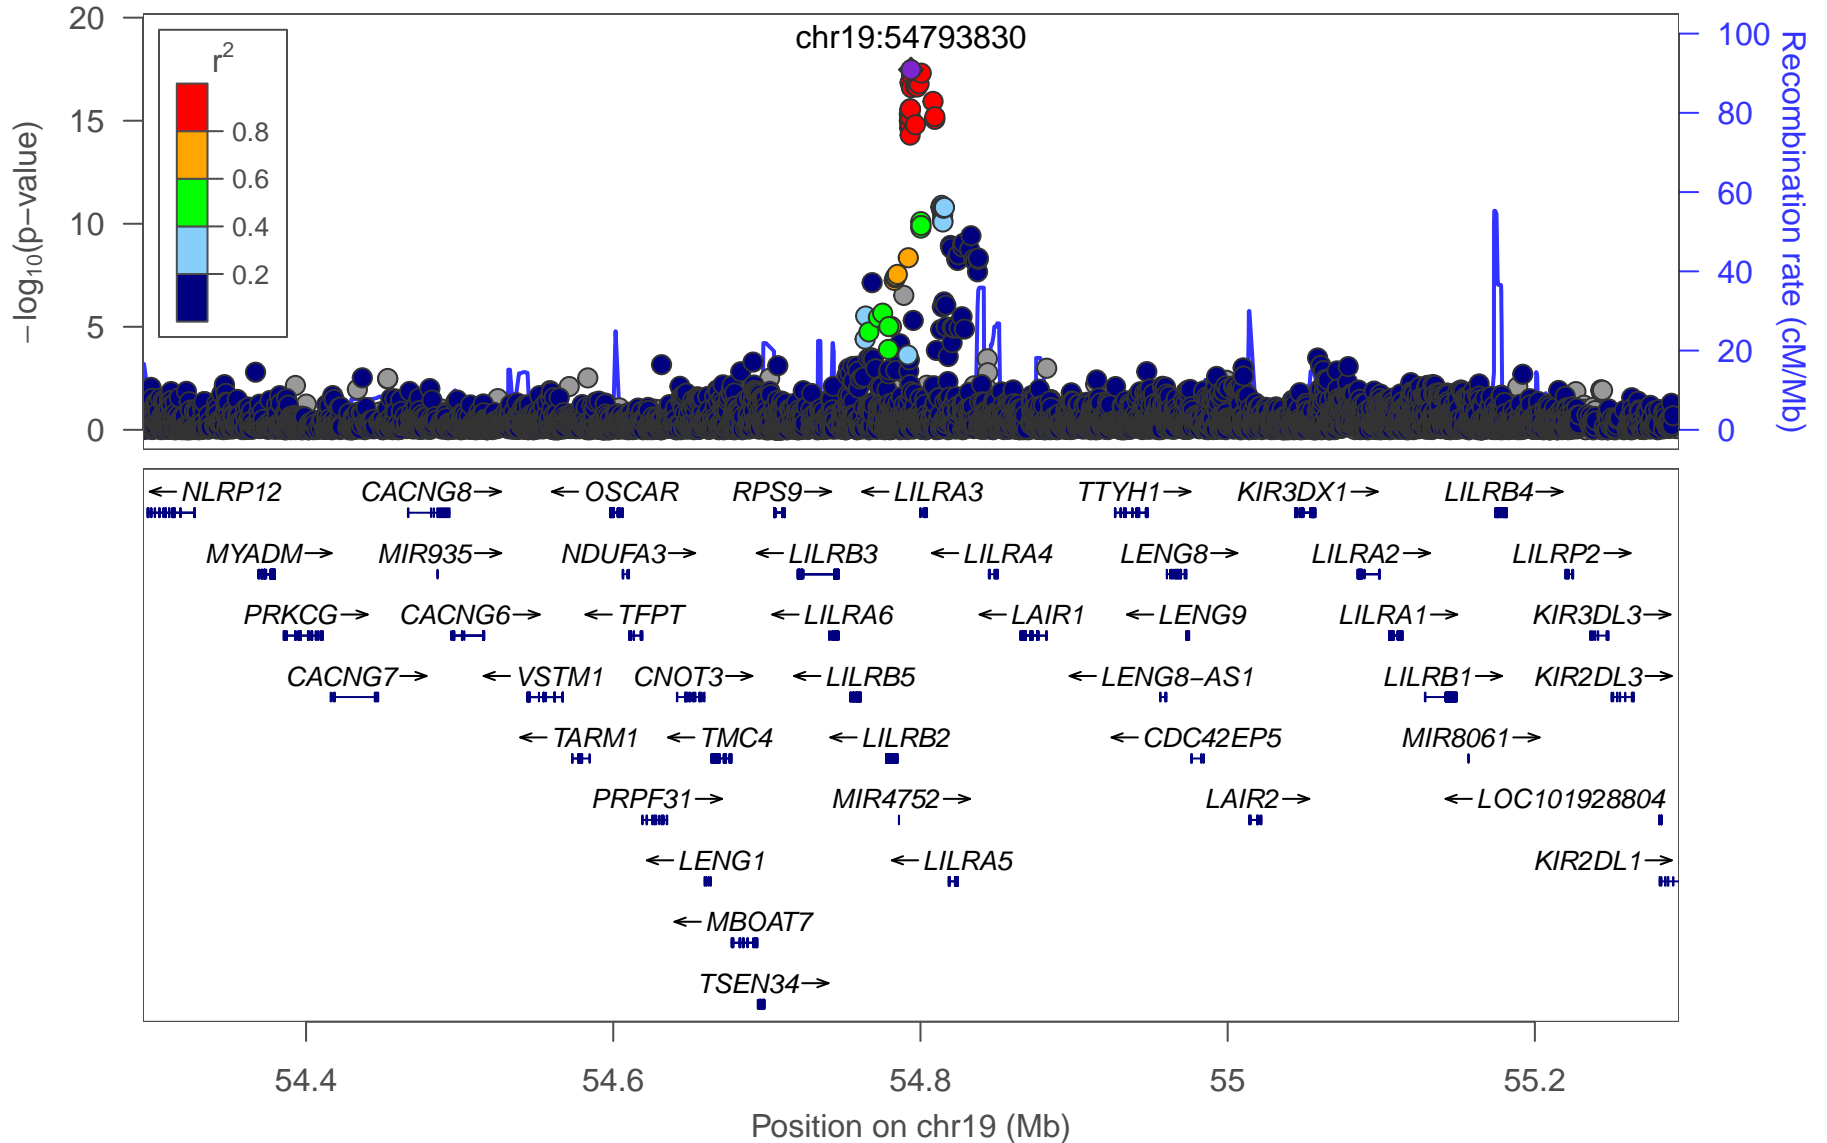

# 19\_13:Serum-TG

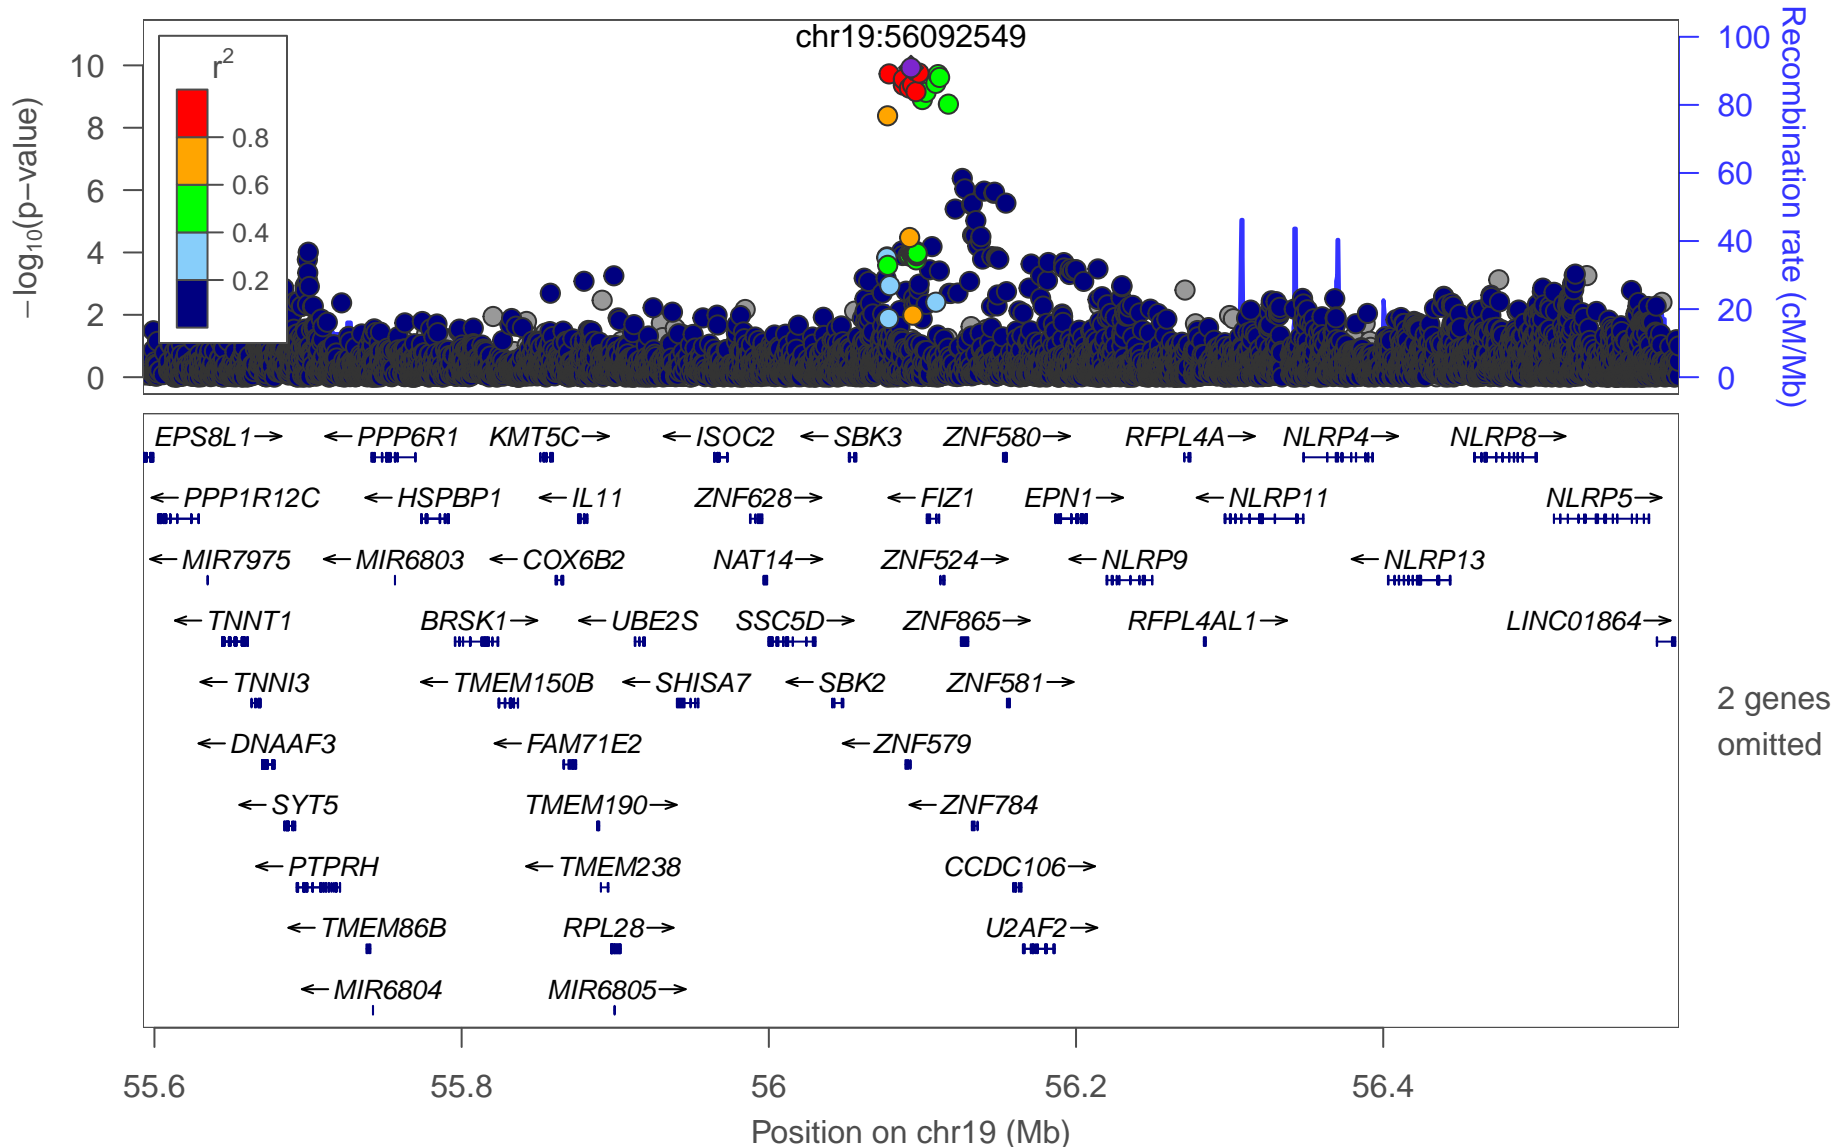

# 19\_14:IDL-CE

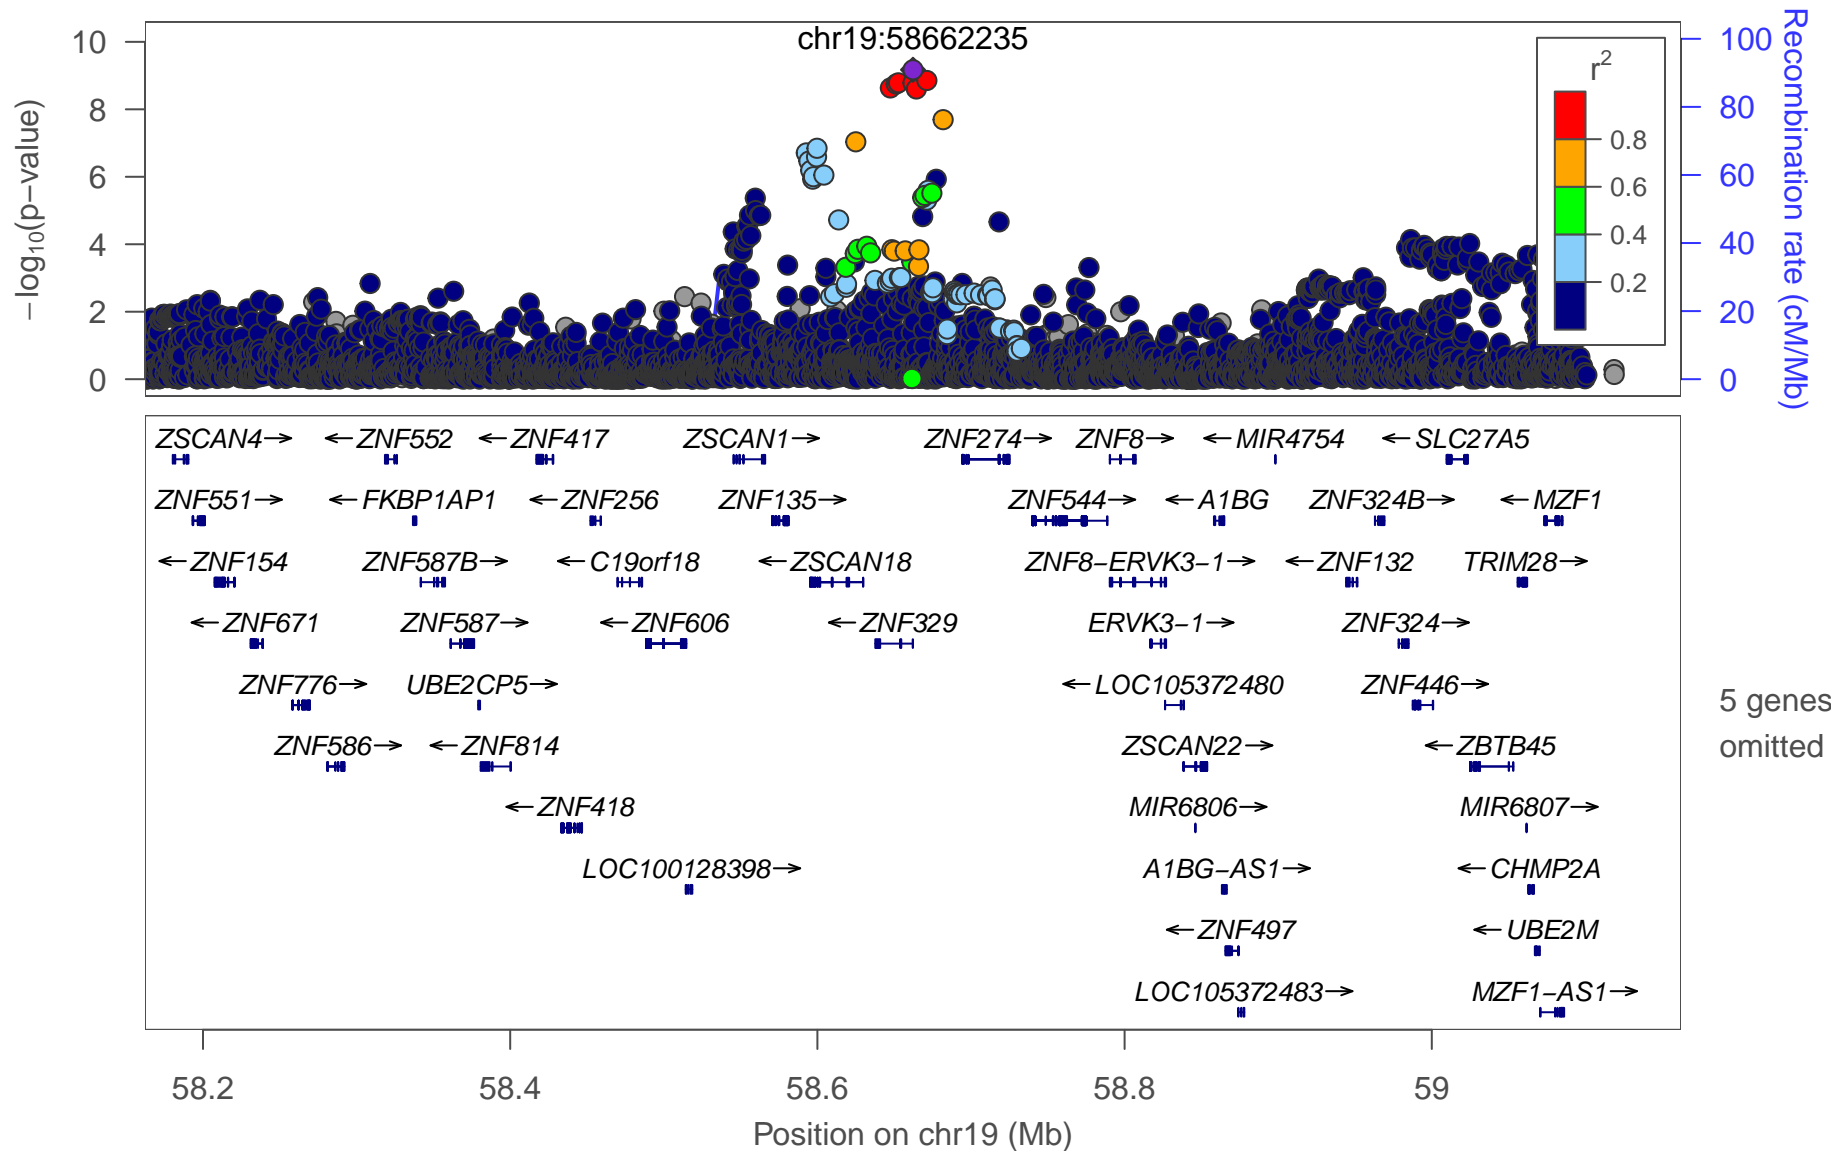

# 20\_1:IDL-CE\_percent

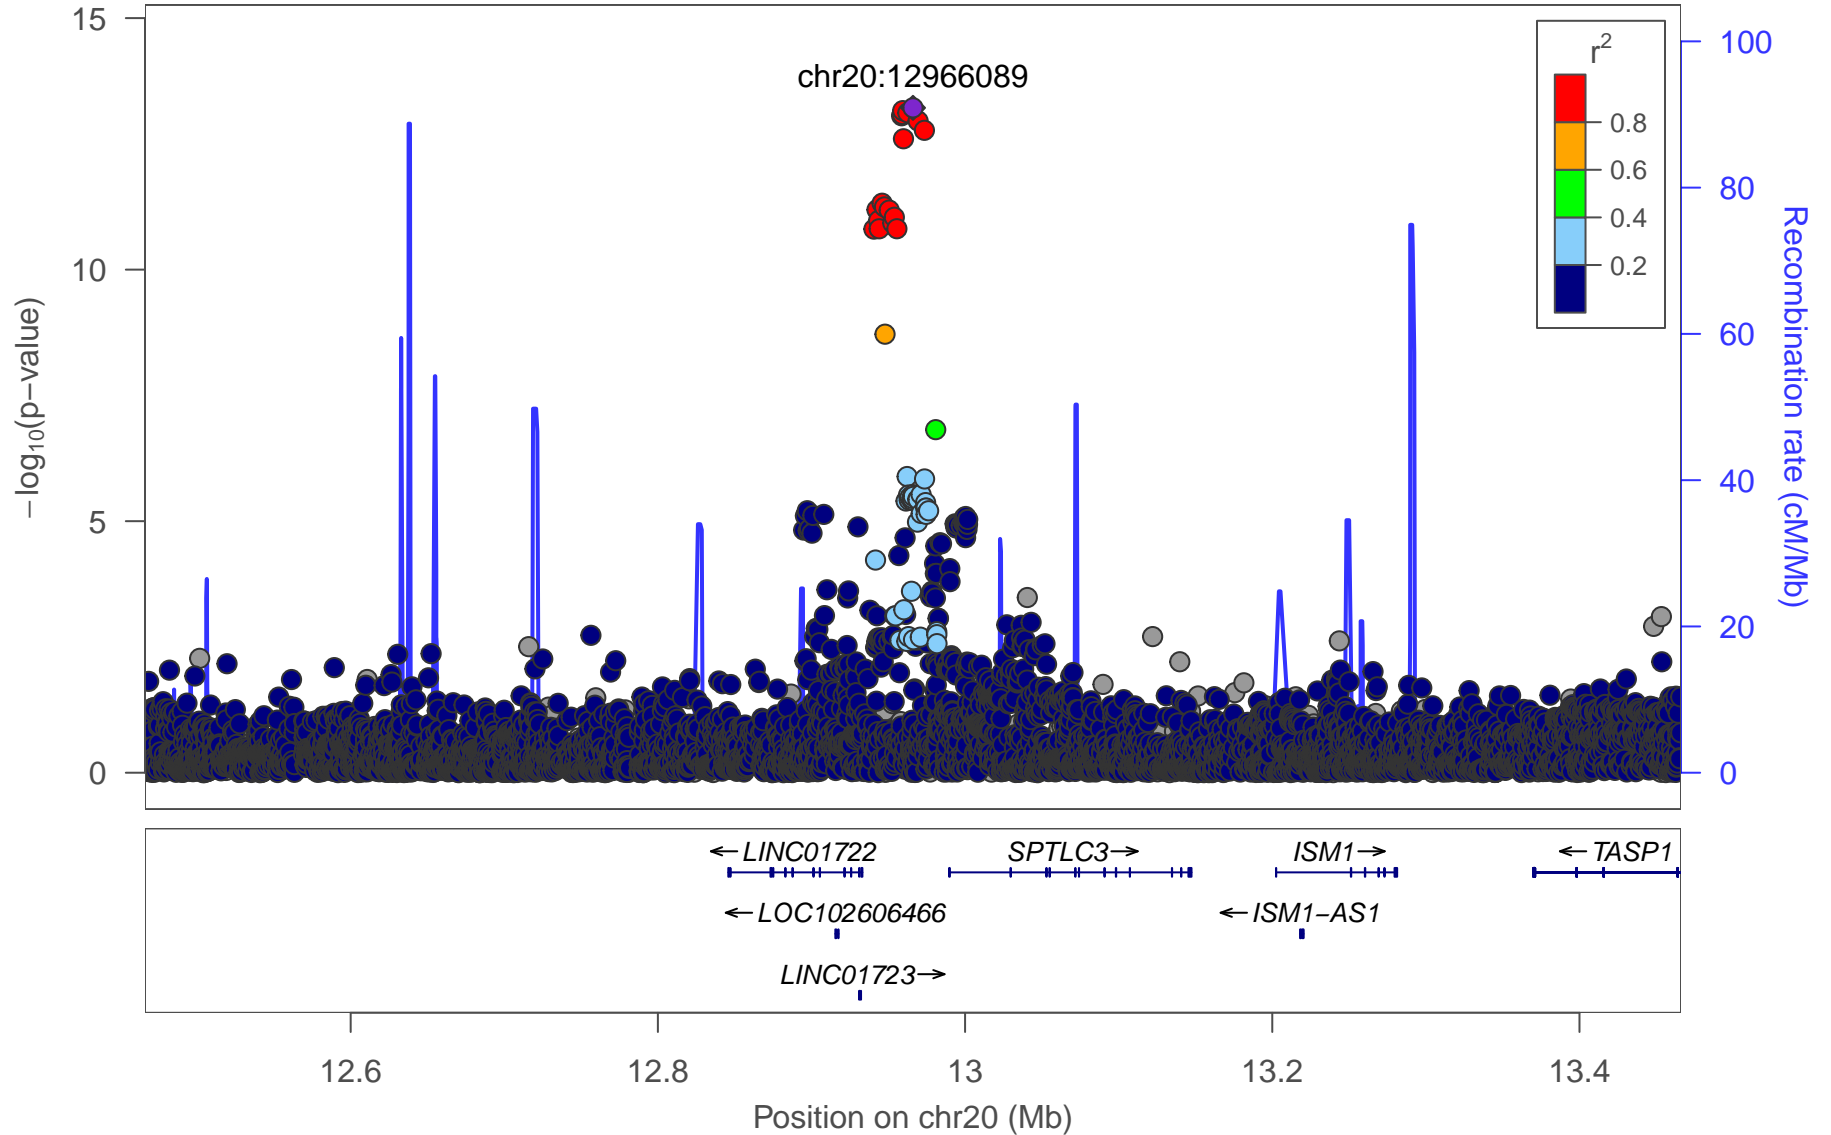

# 20\_2:S-LDL-CE

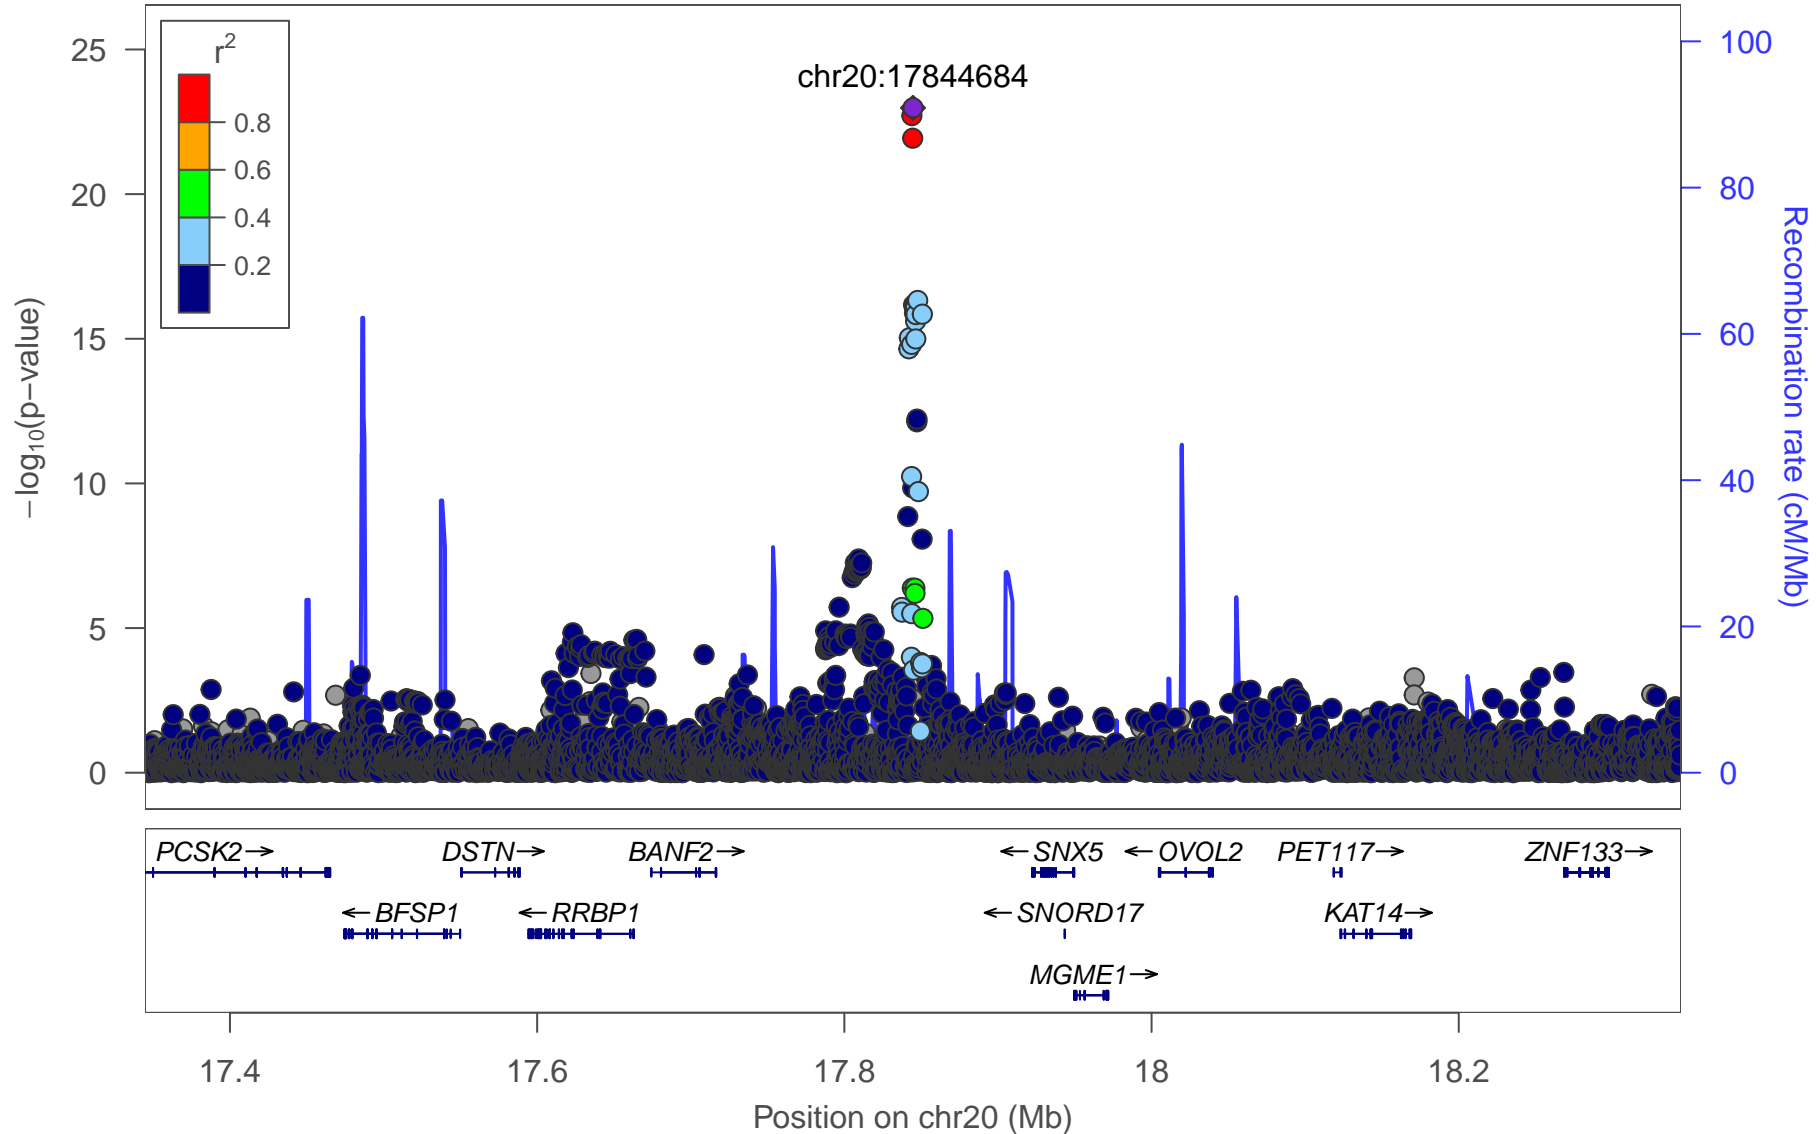

# 20\_3: Ace

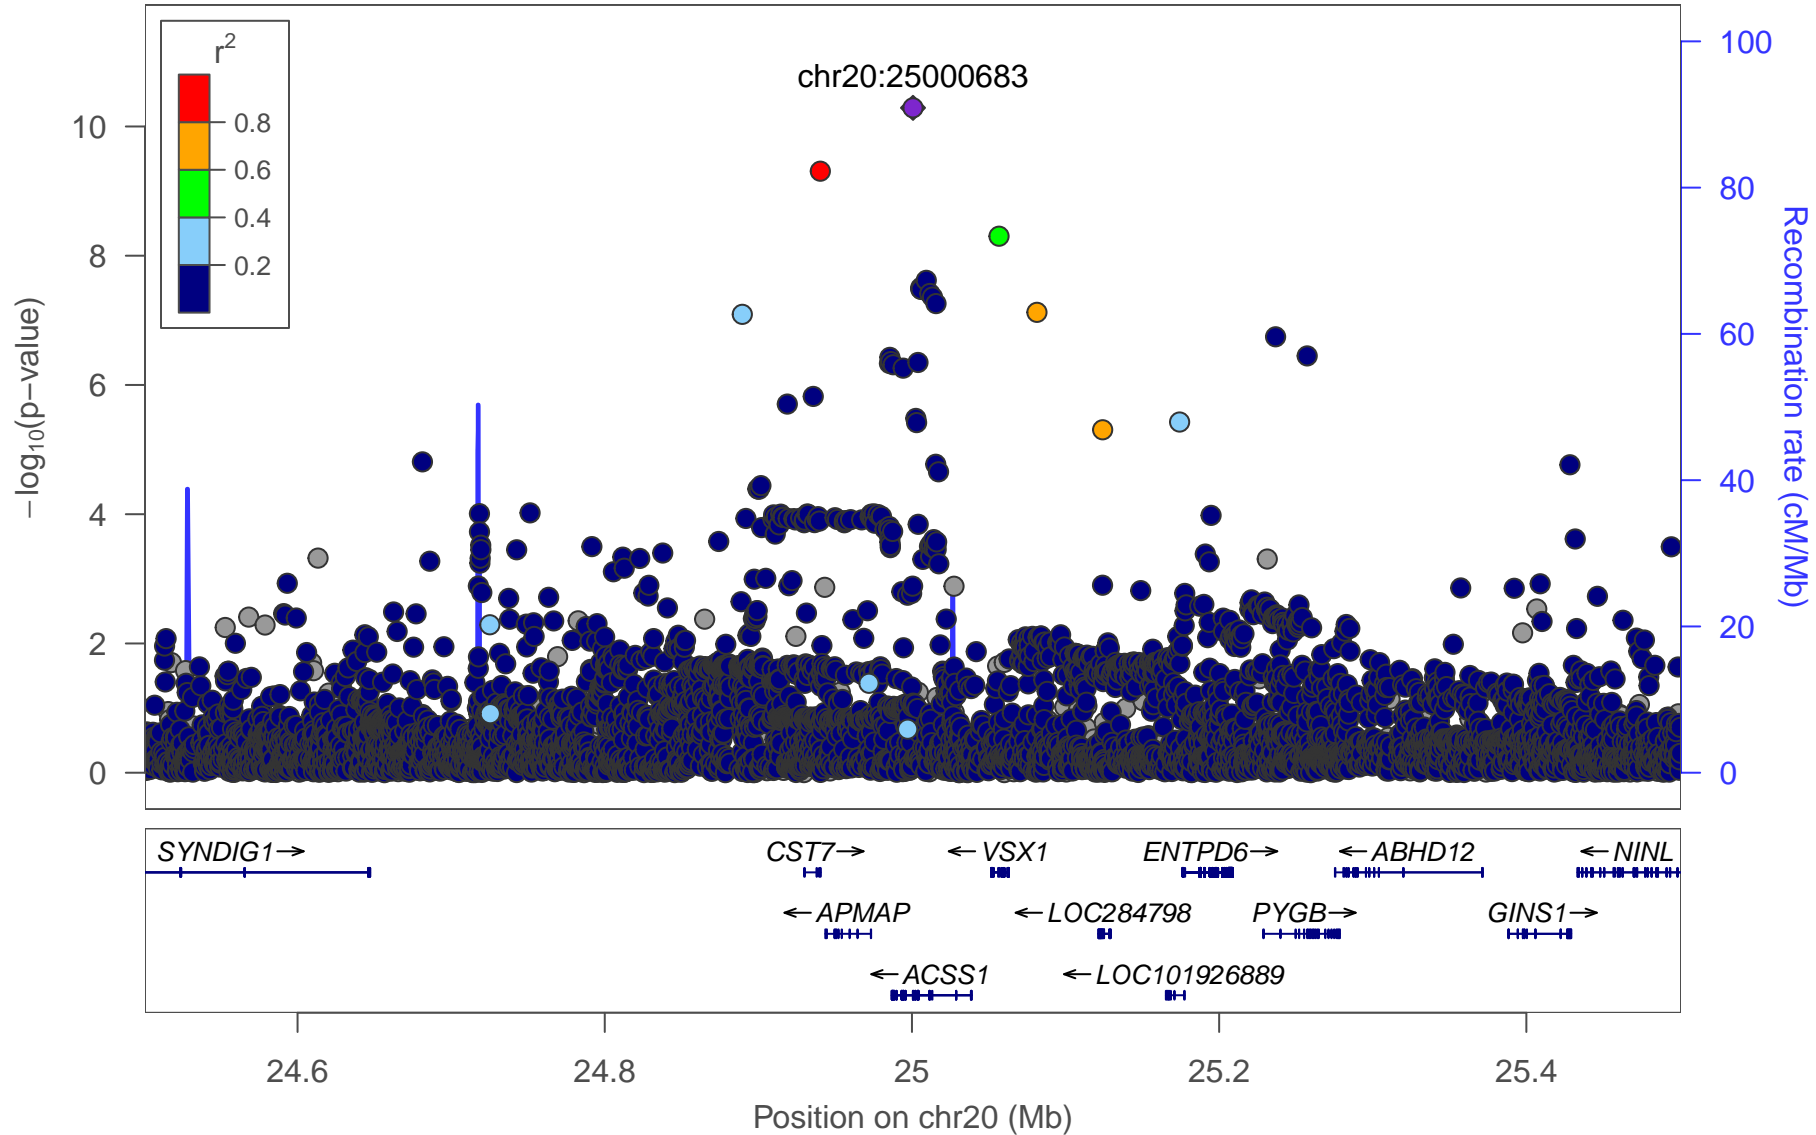

# 20\_4:UnsatDeg

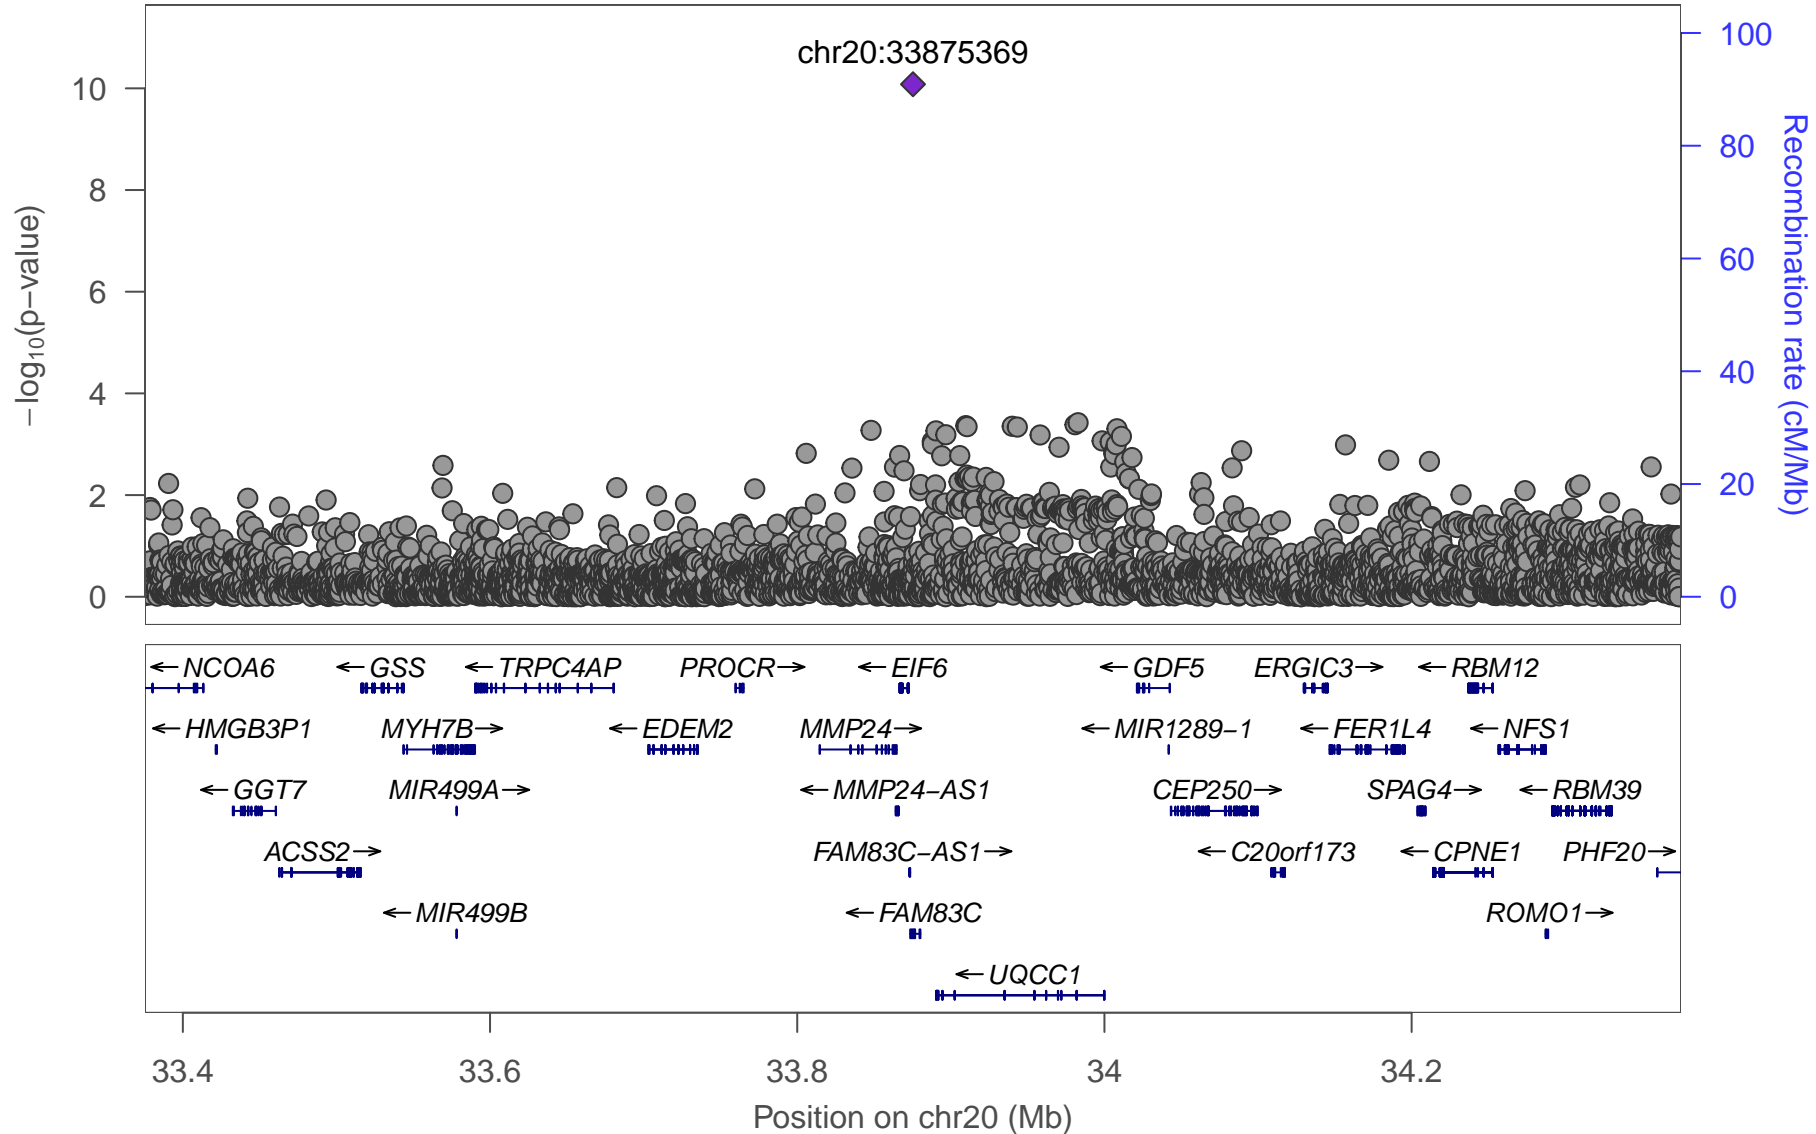



# 20\_5:XS-VLDL-PL

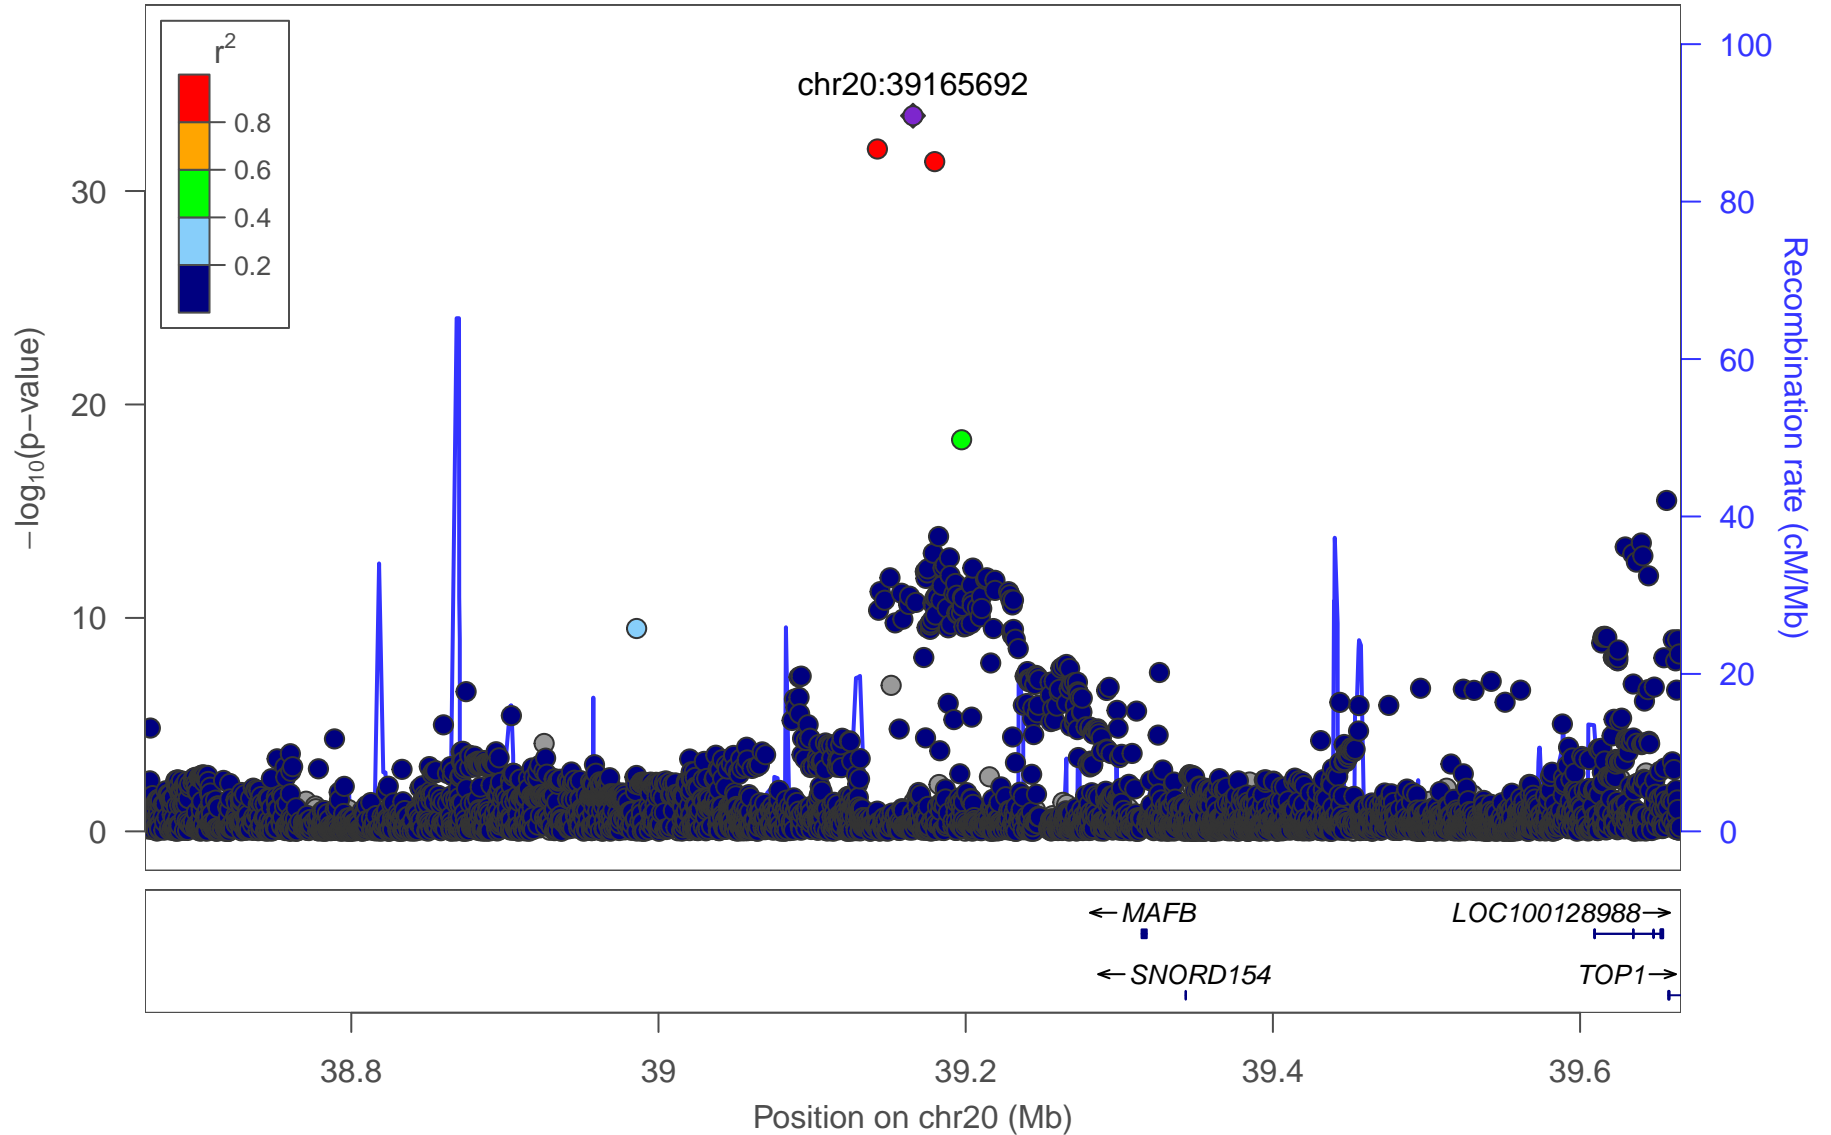

# 20\_6:S-HDL-P

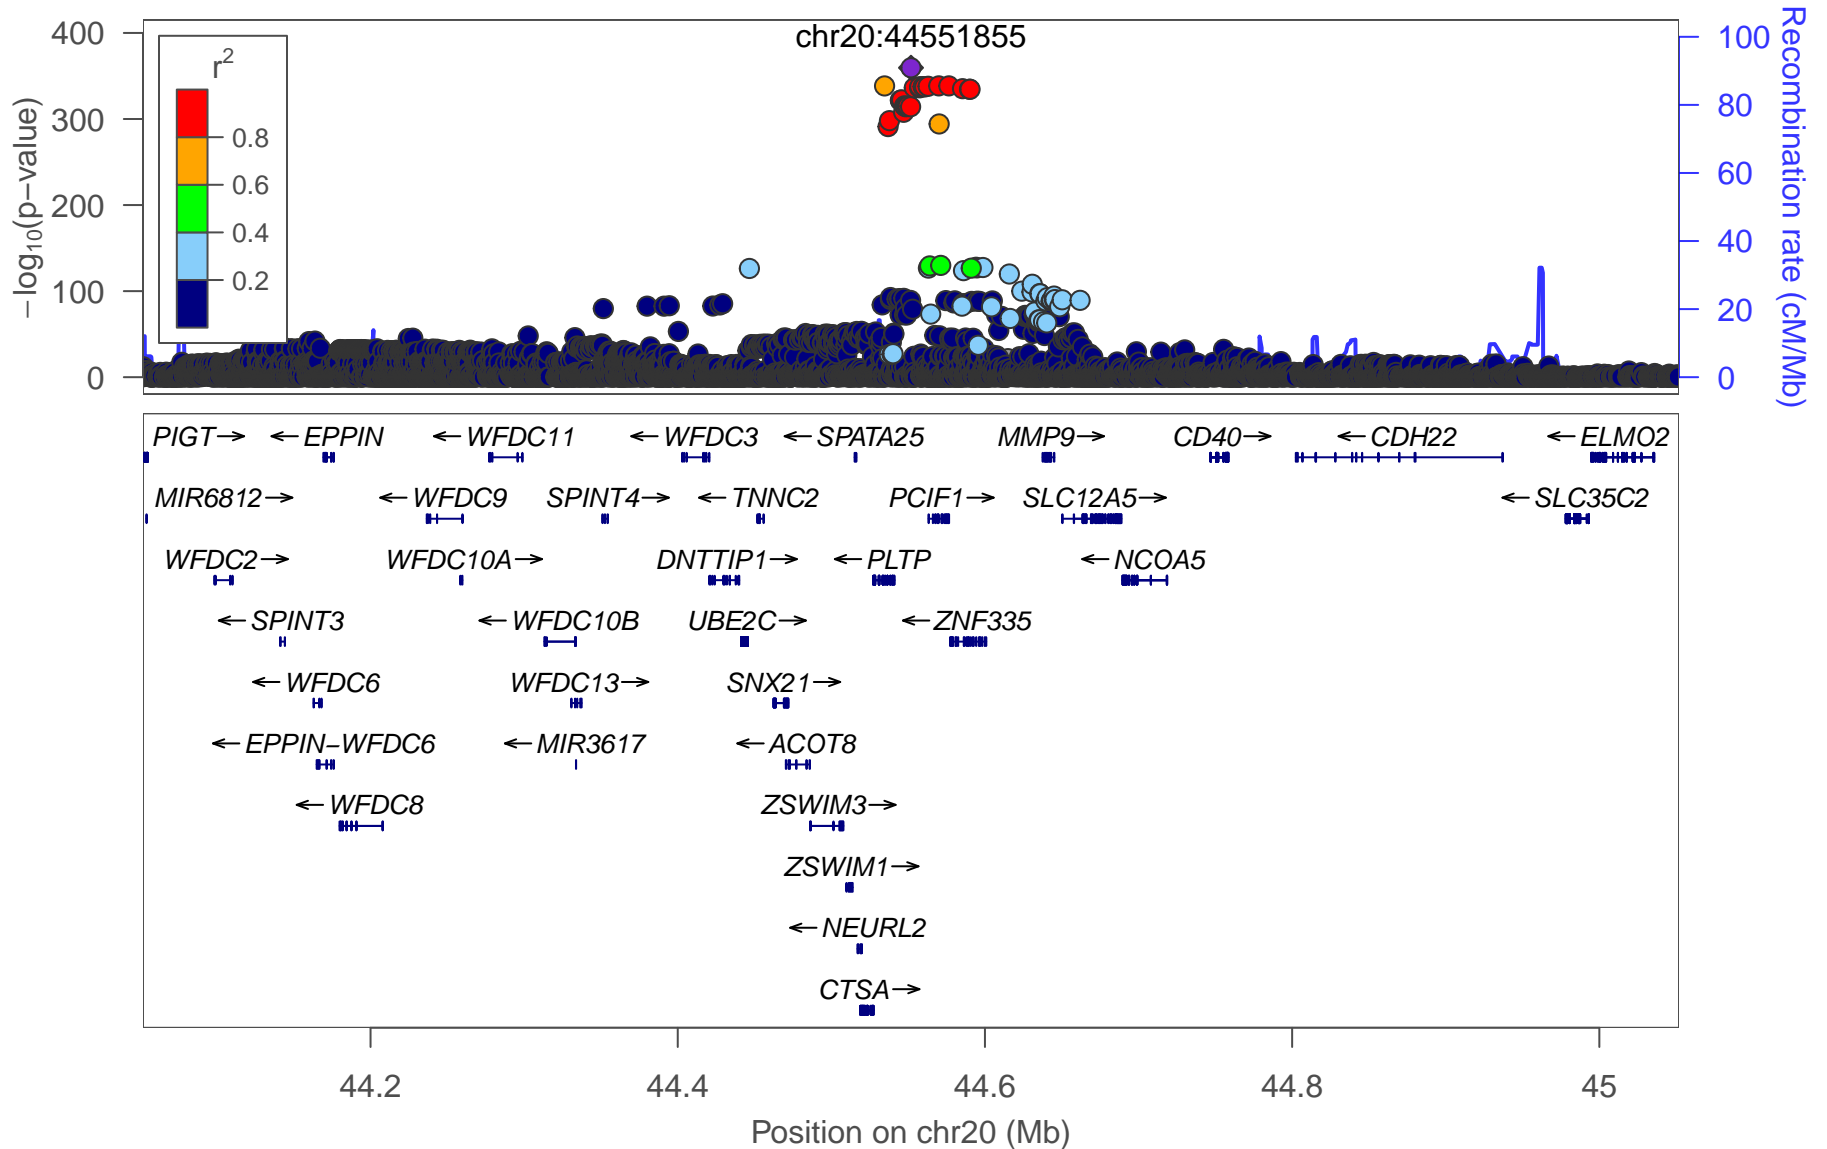

# 20\_7:Crea

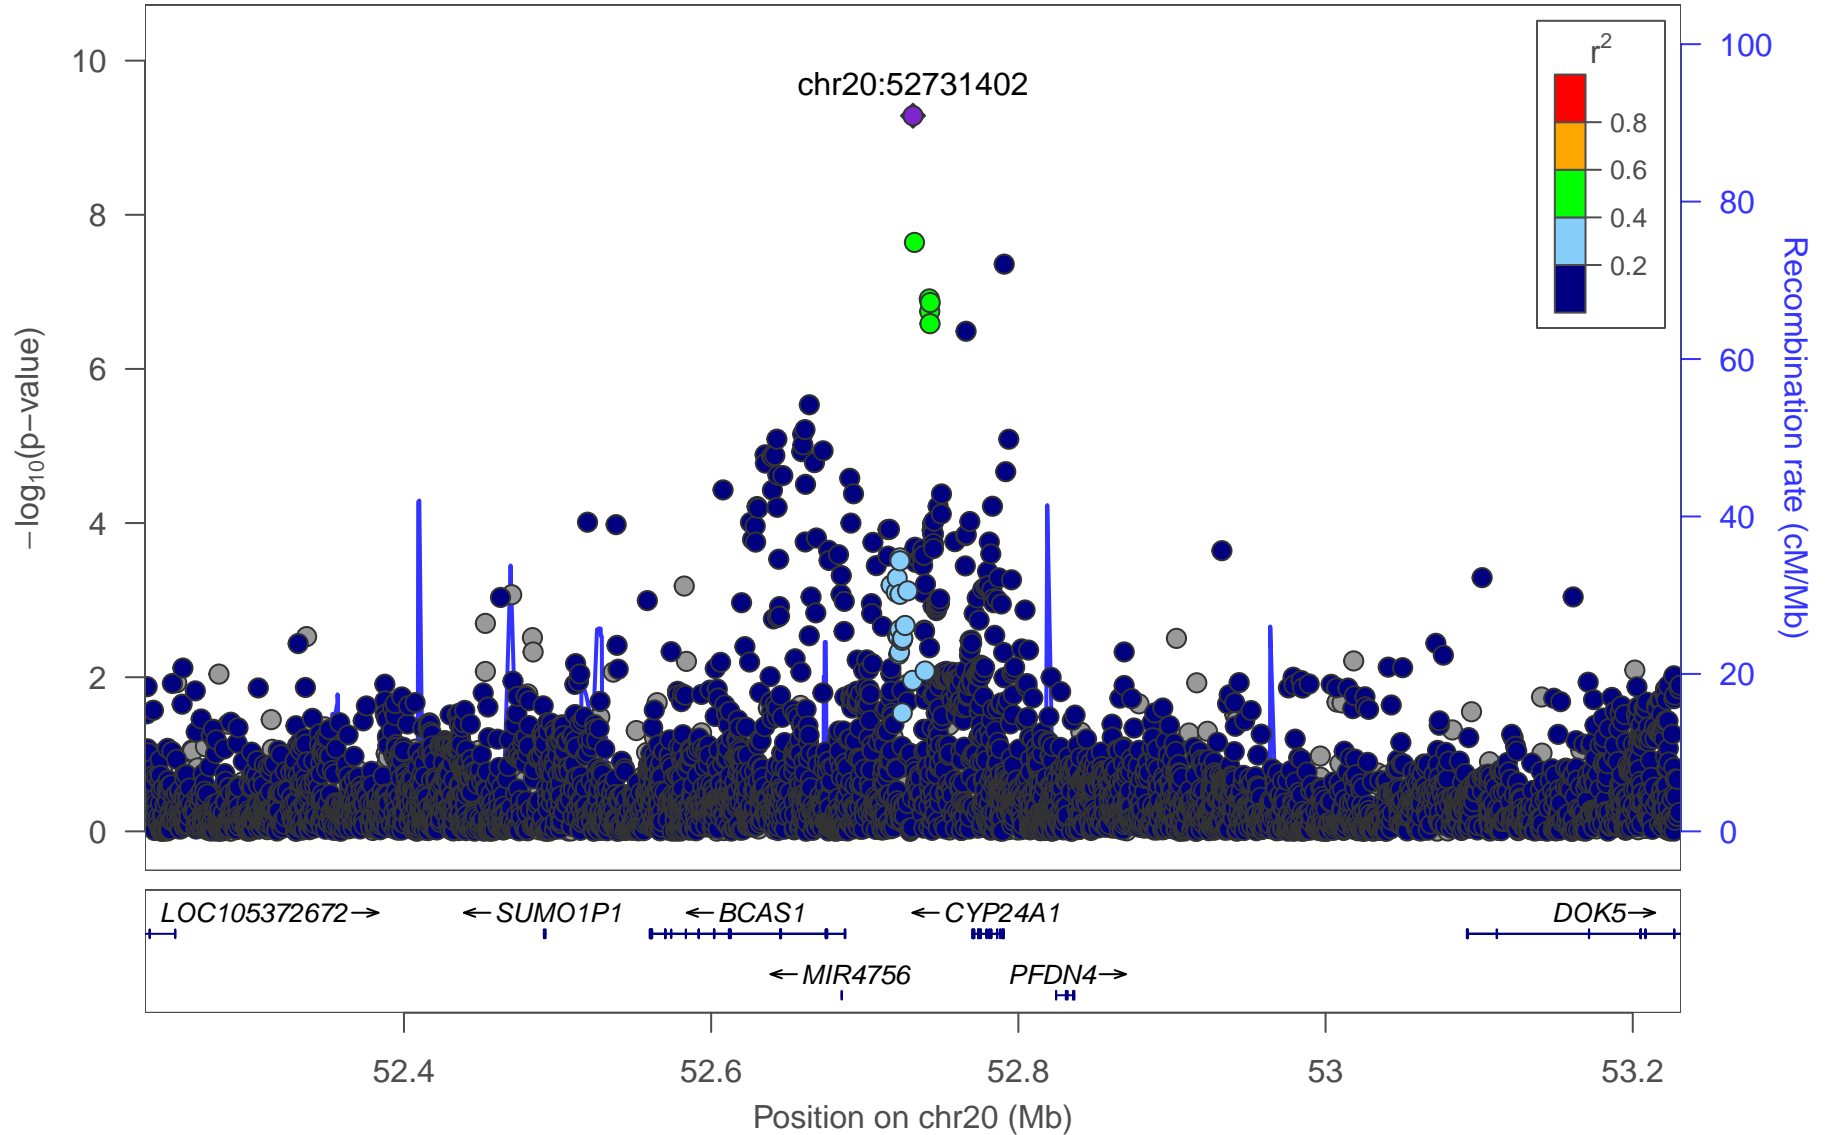

# 20\_8:Gln

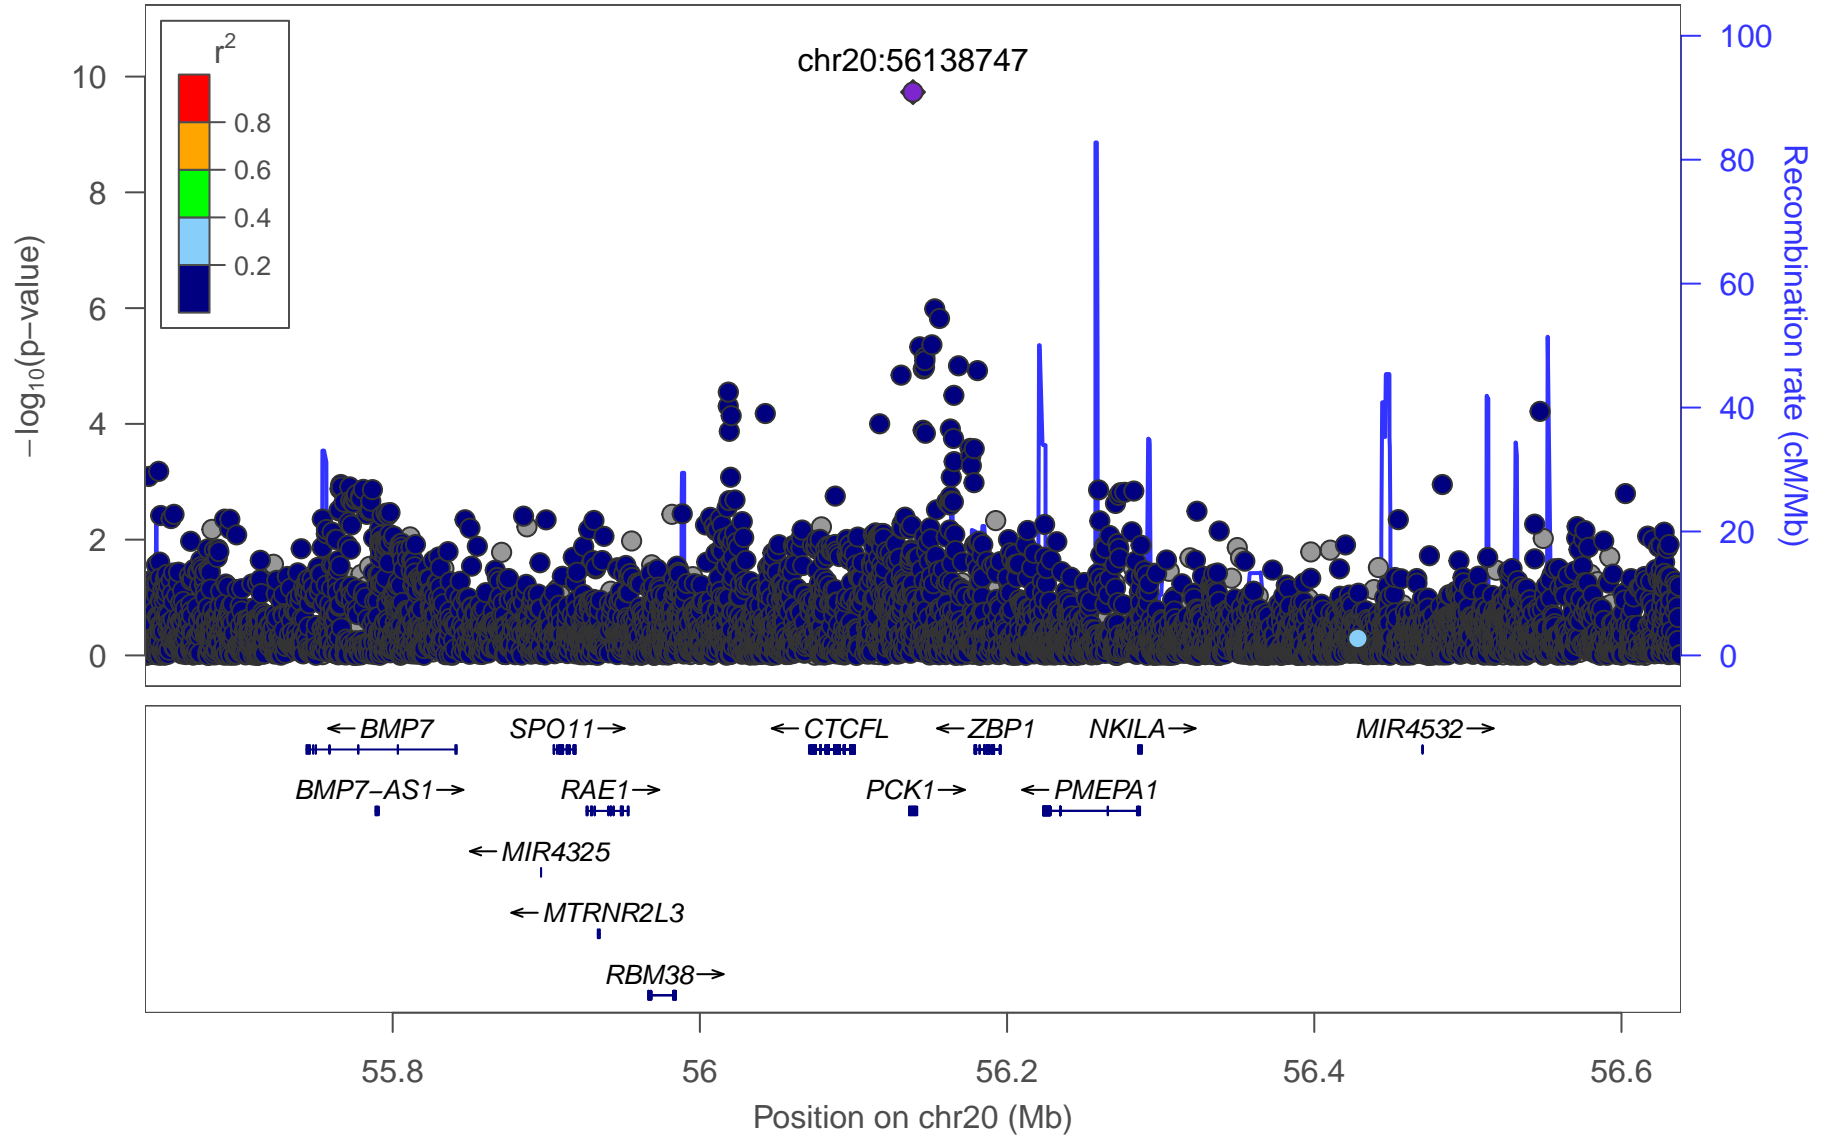

# 20\_9:Phe

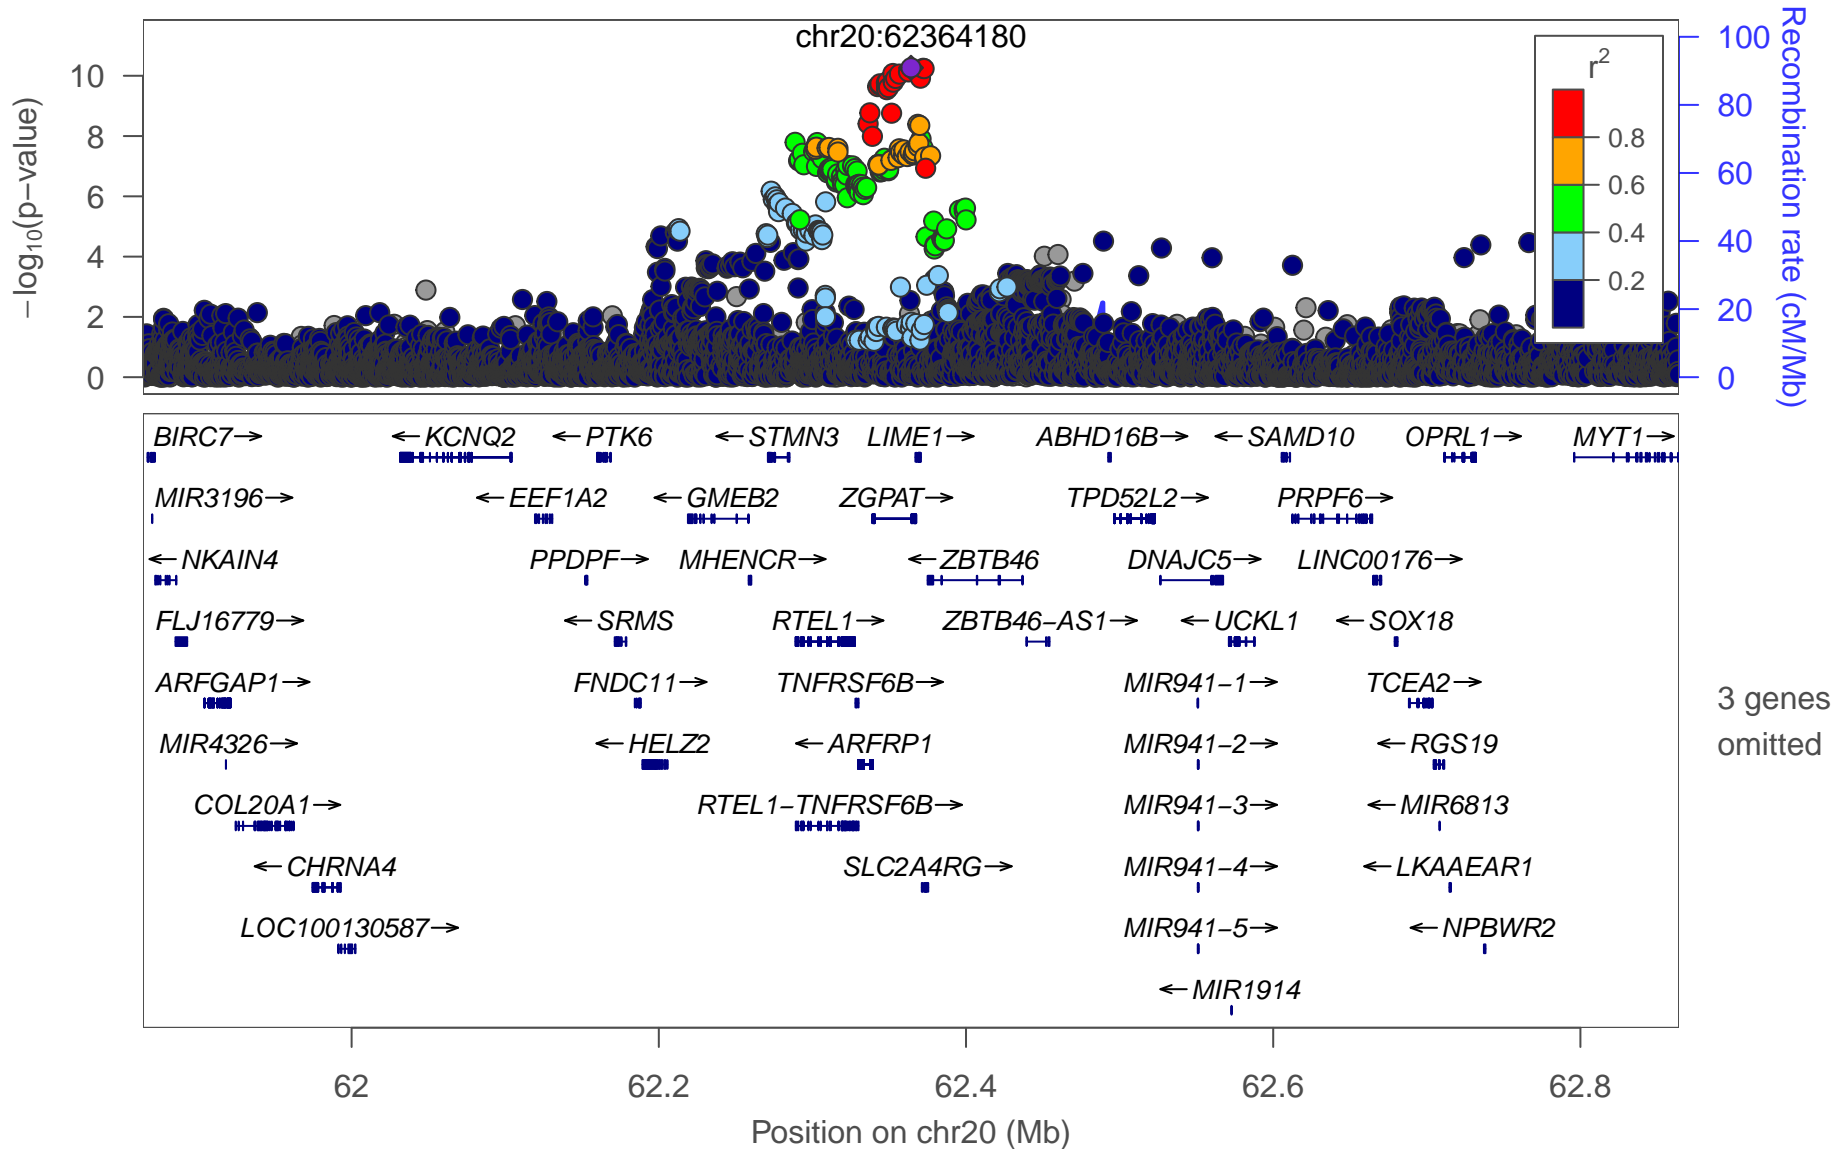

# 21\_1:M-LDL-PL\_percent

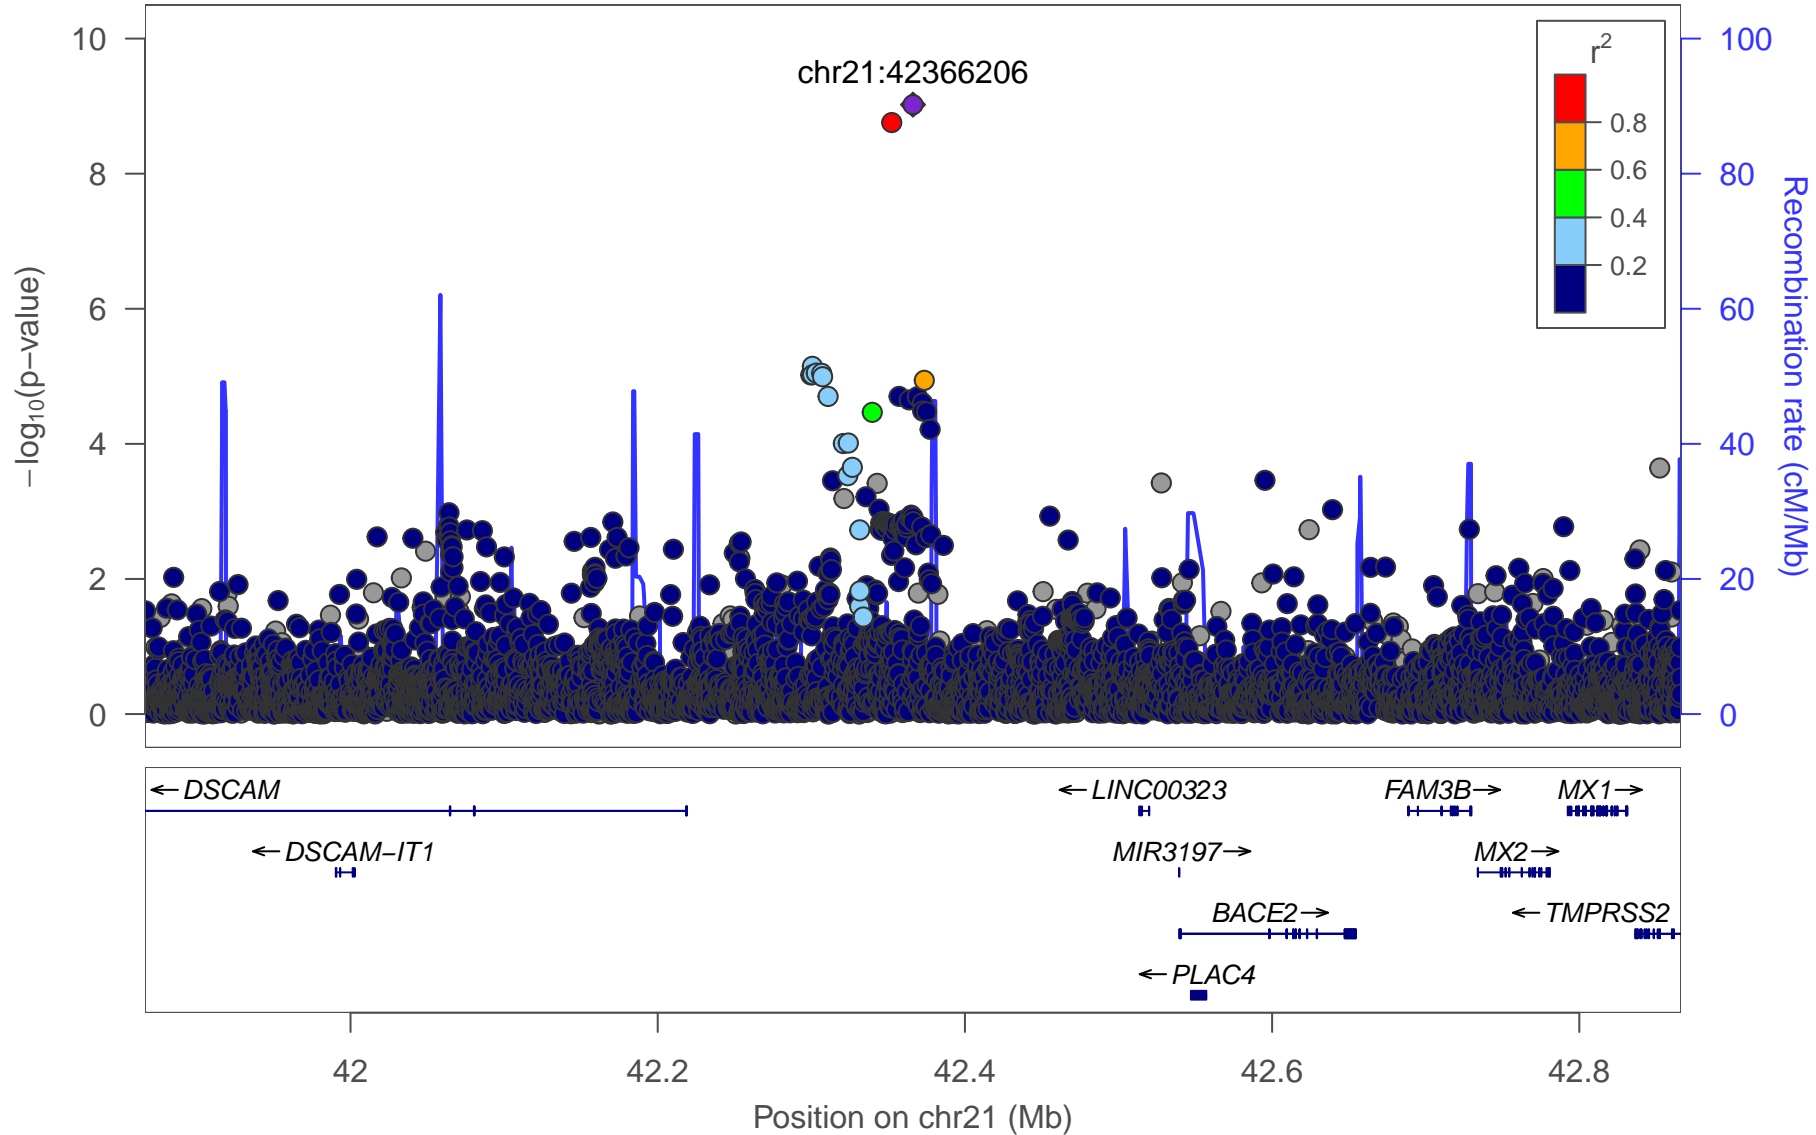

# 22\_1:Cit

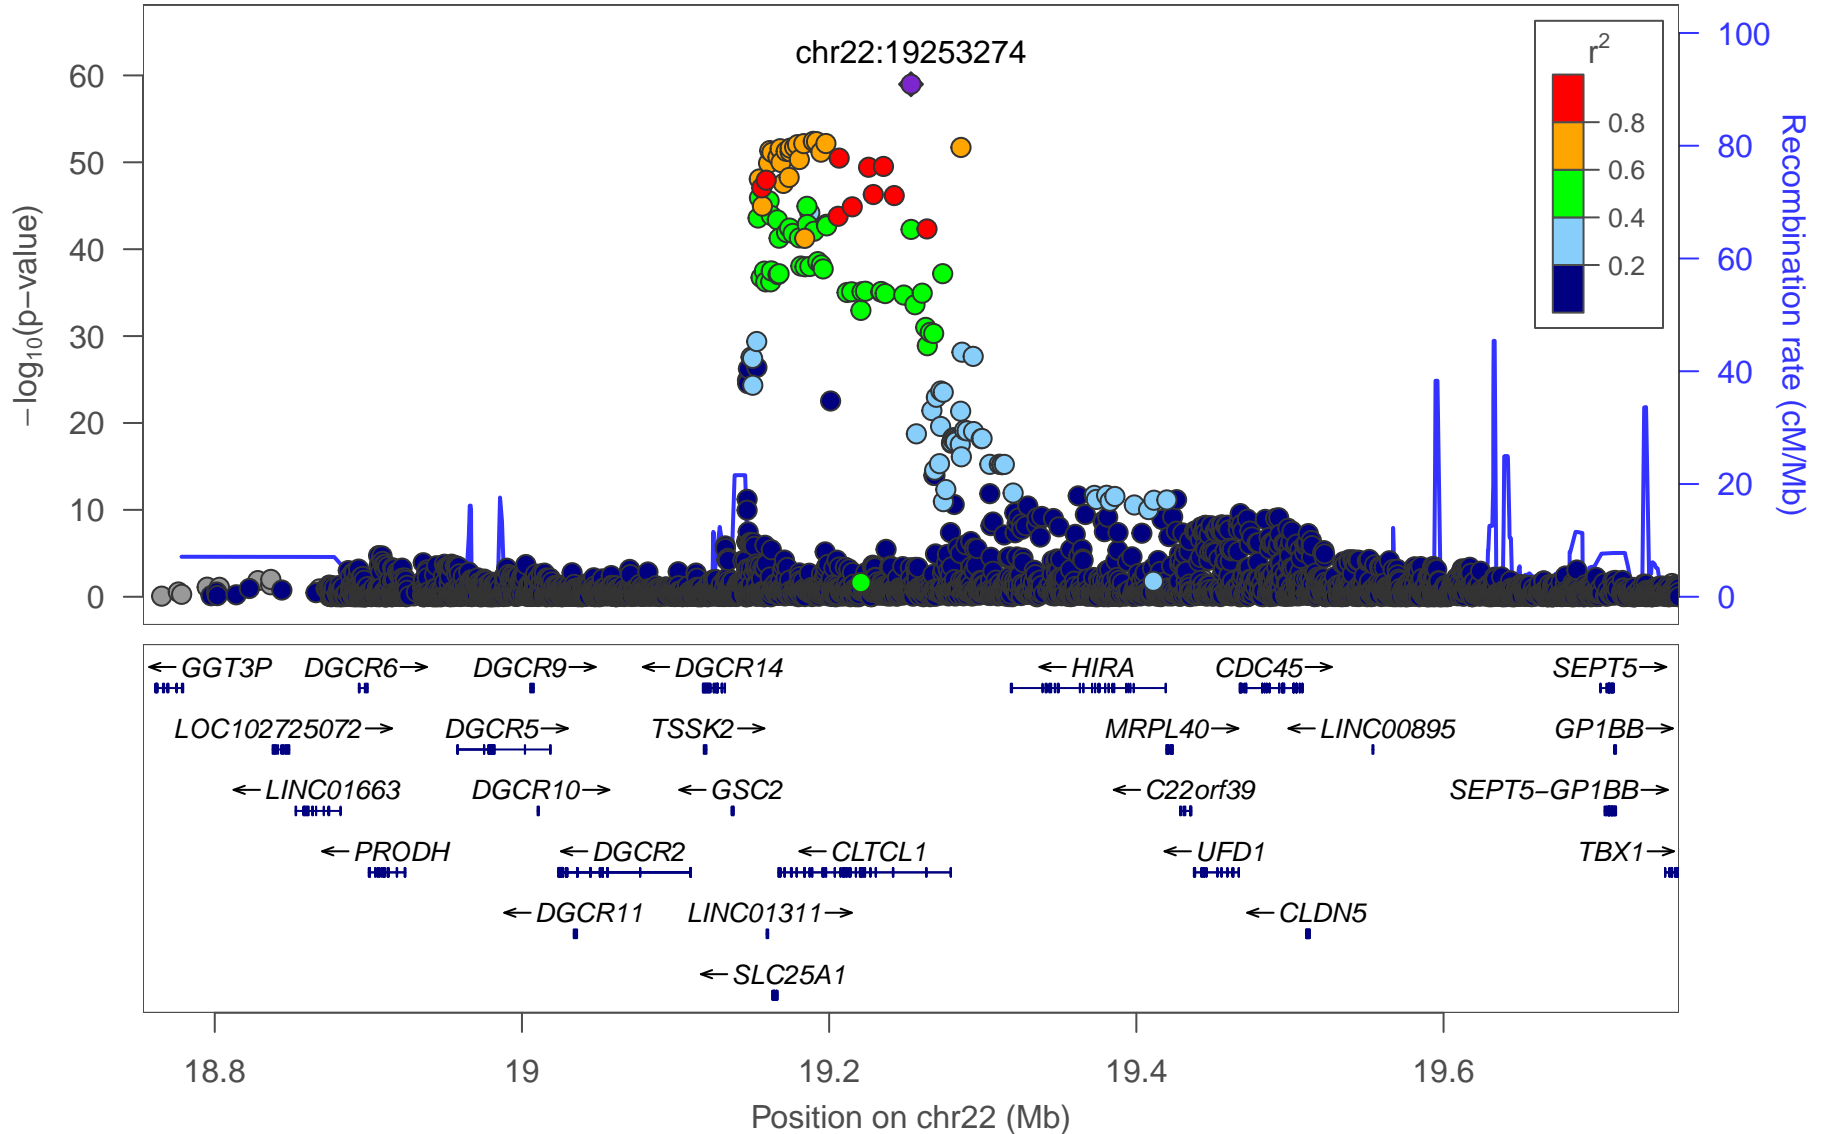

# 22\_2:ApoA1

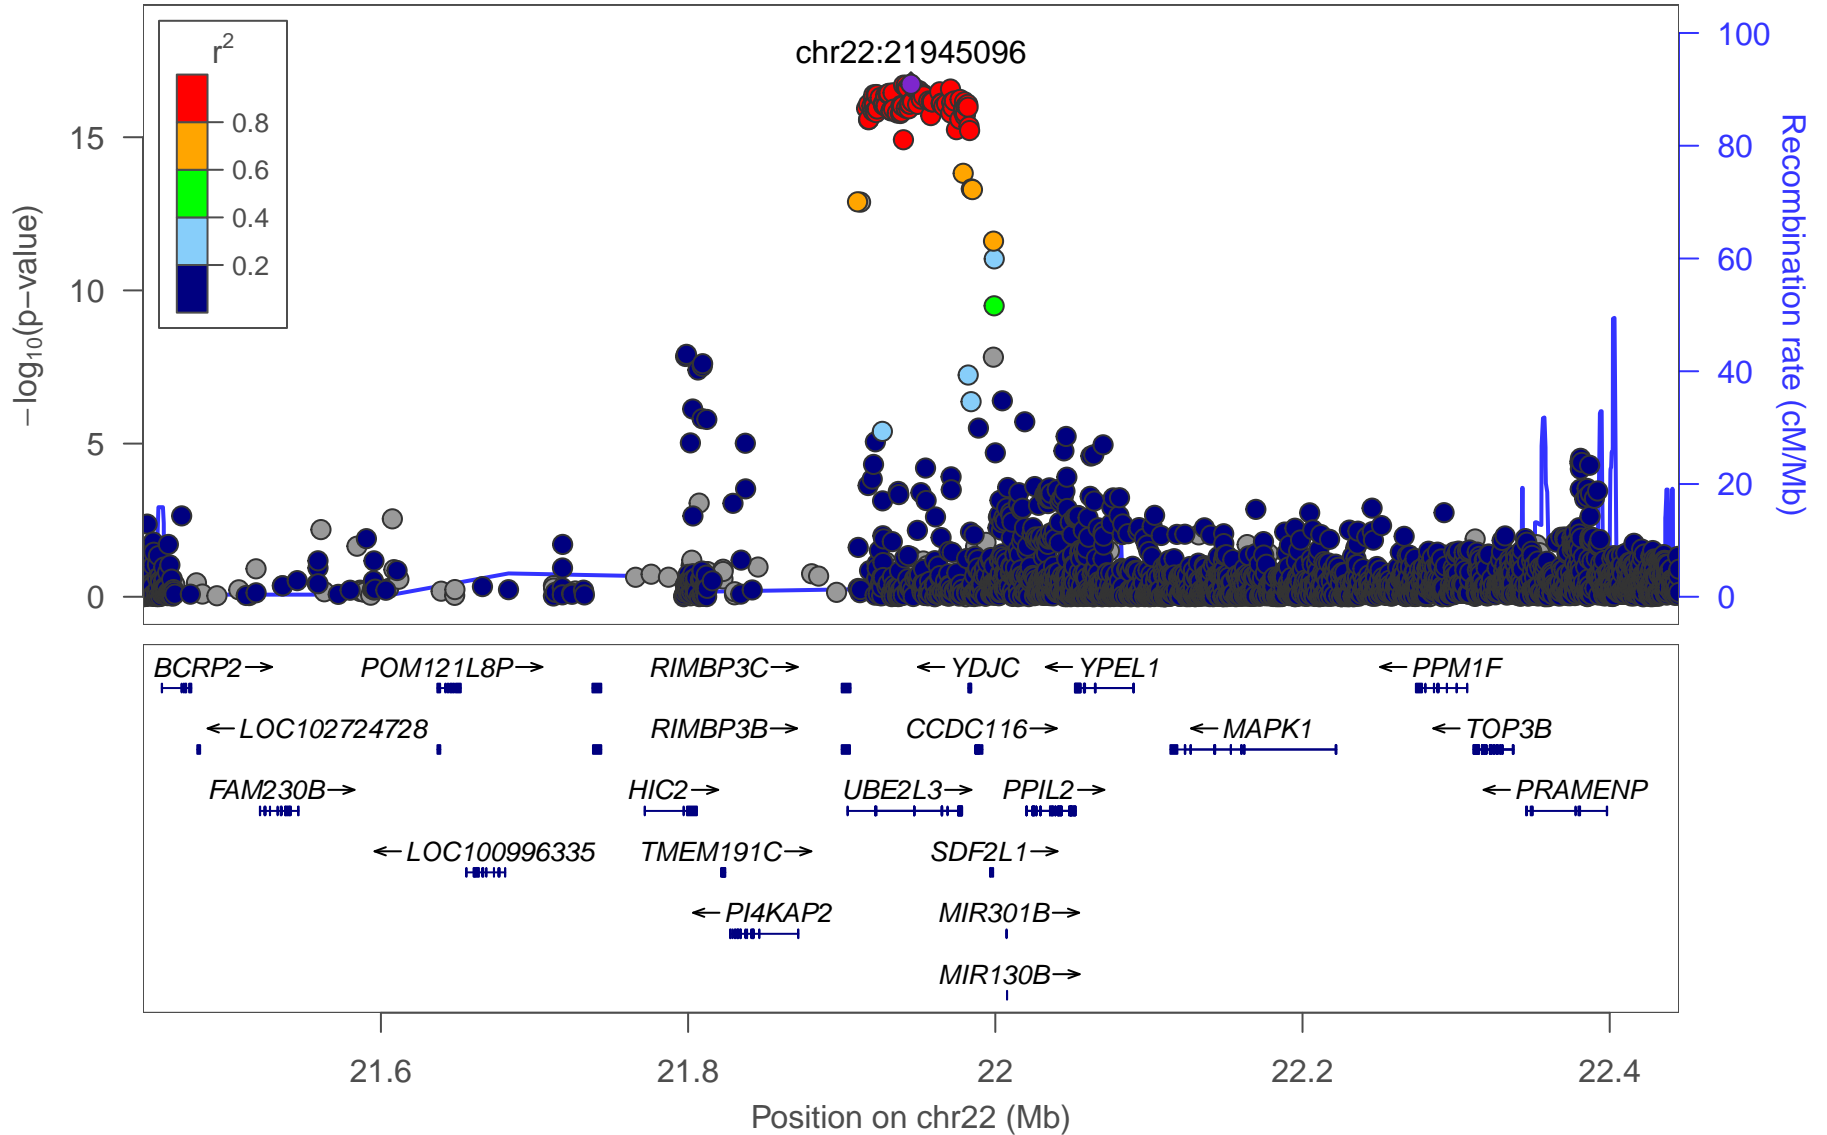



# 22\_3:XL-HDL-FC\_percent

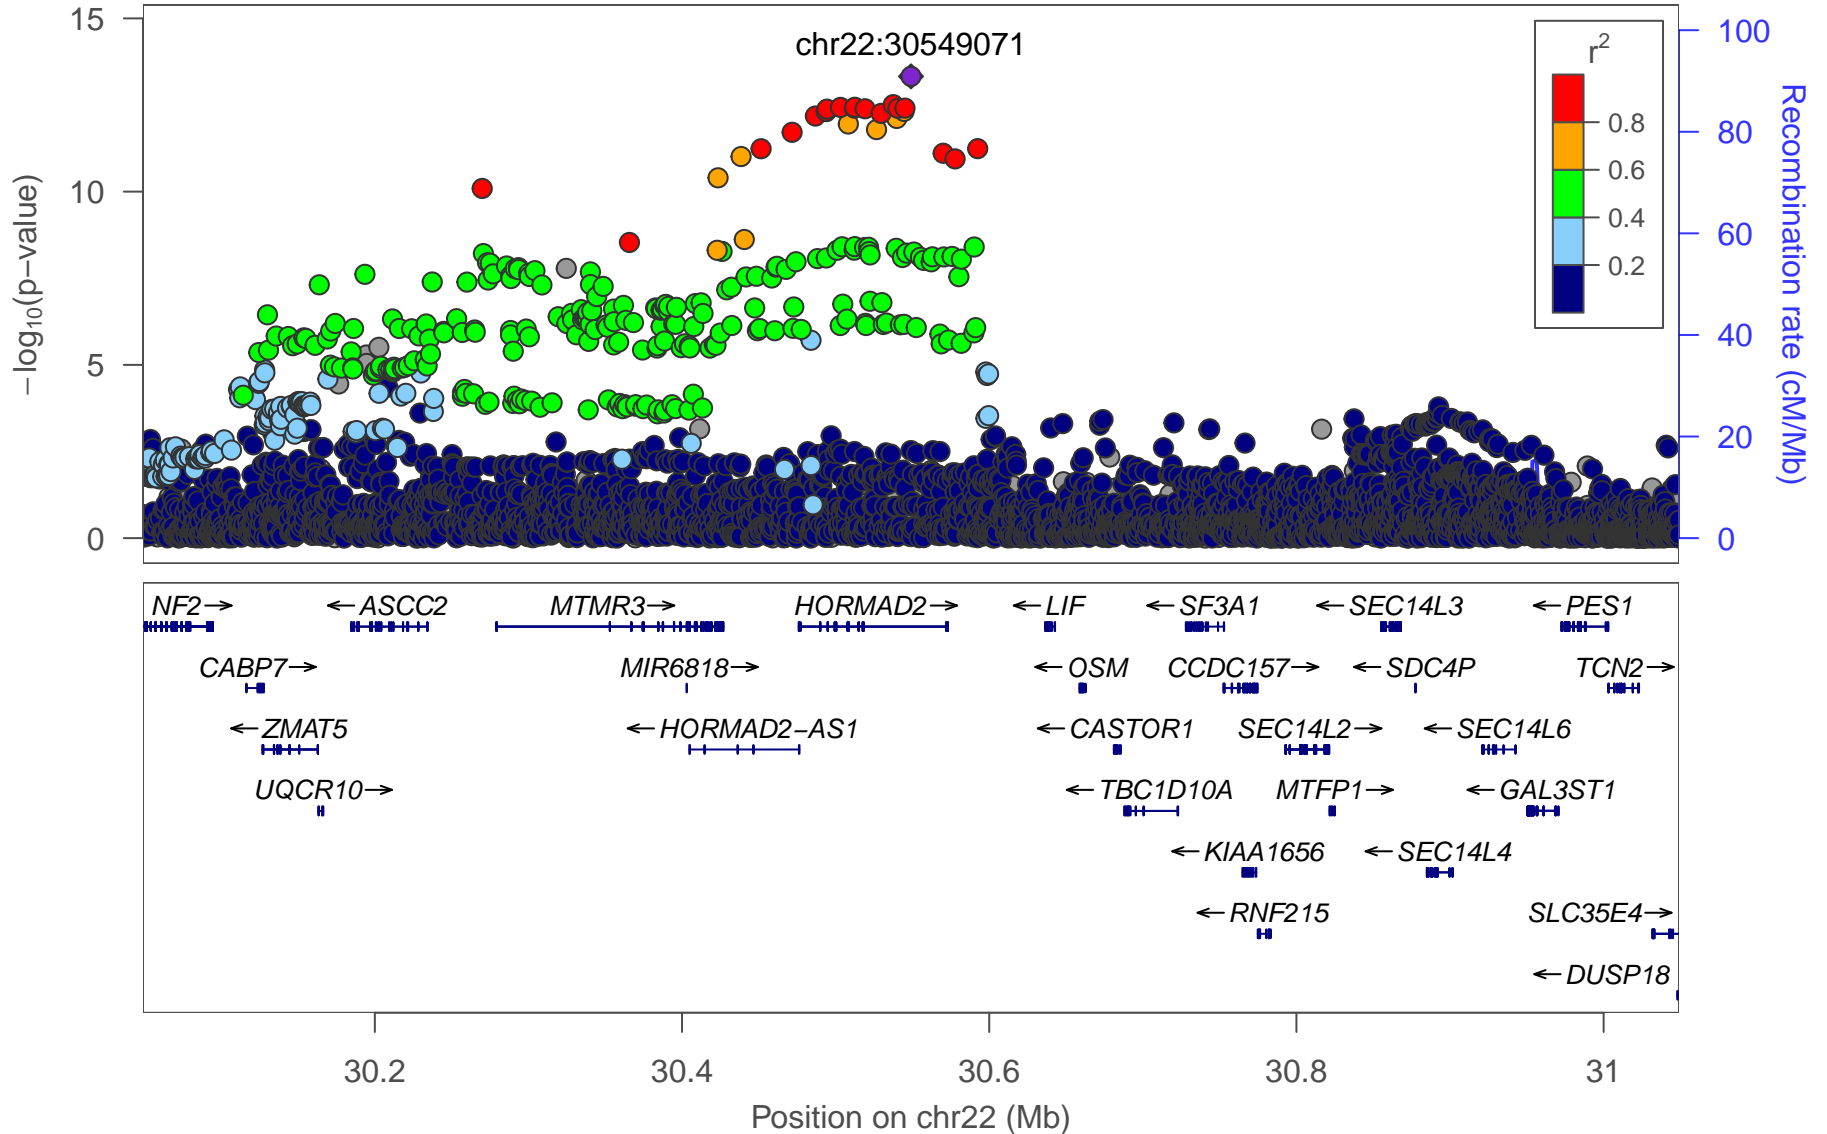

# 22\_4:S-HDL-TG\_percent

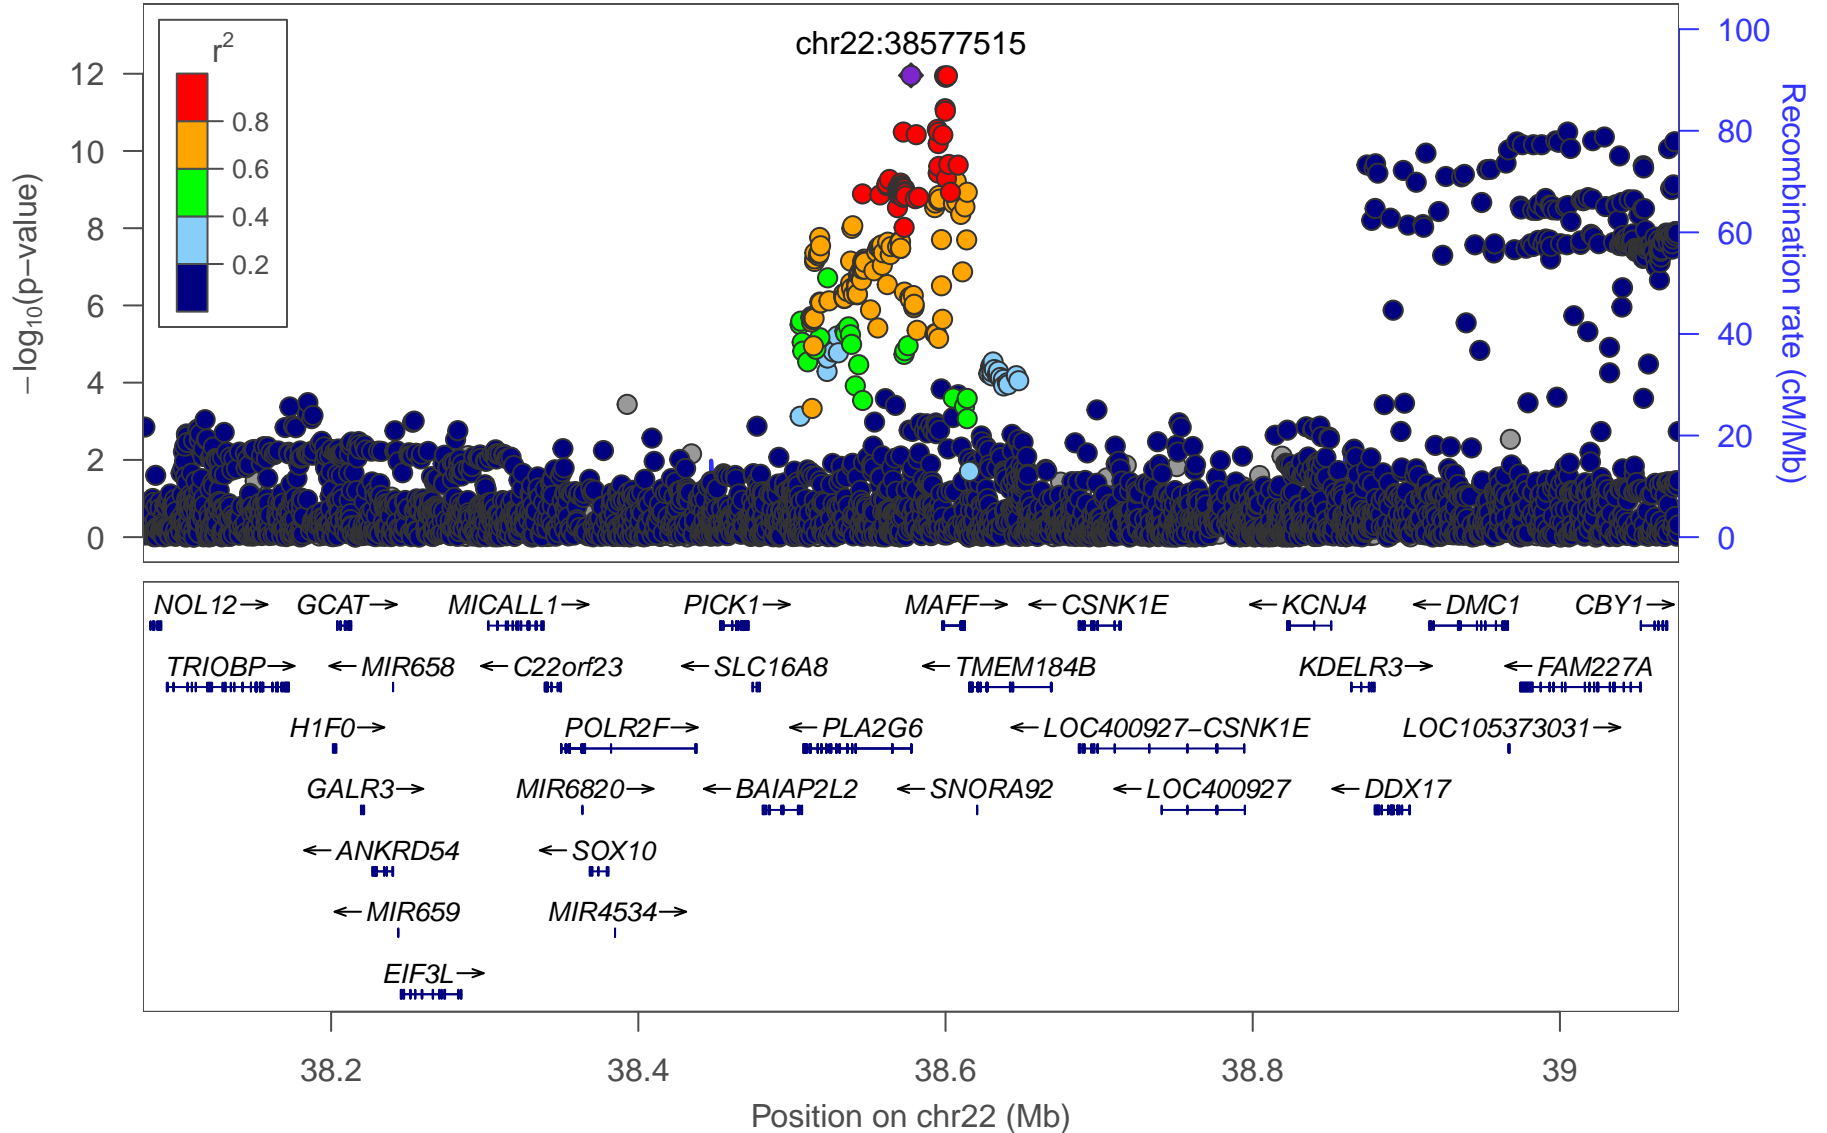

# 22\_5:Crea

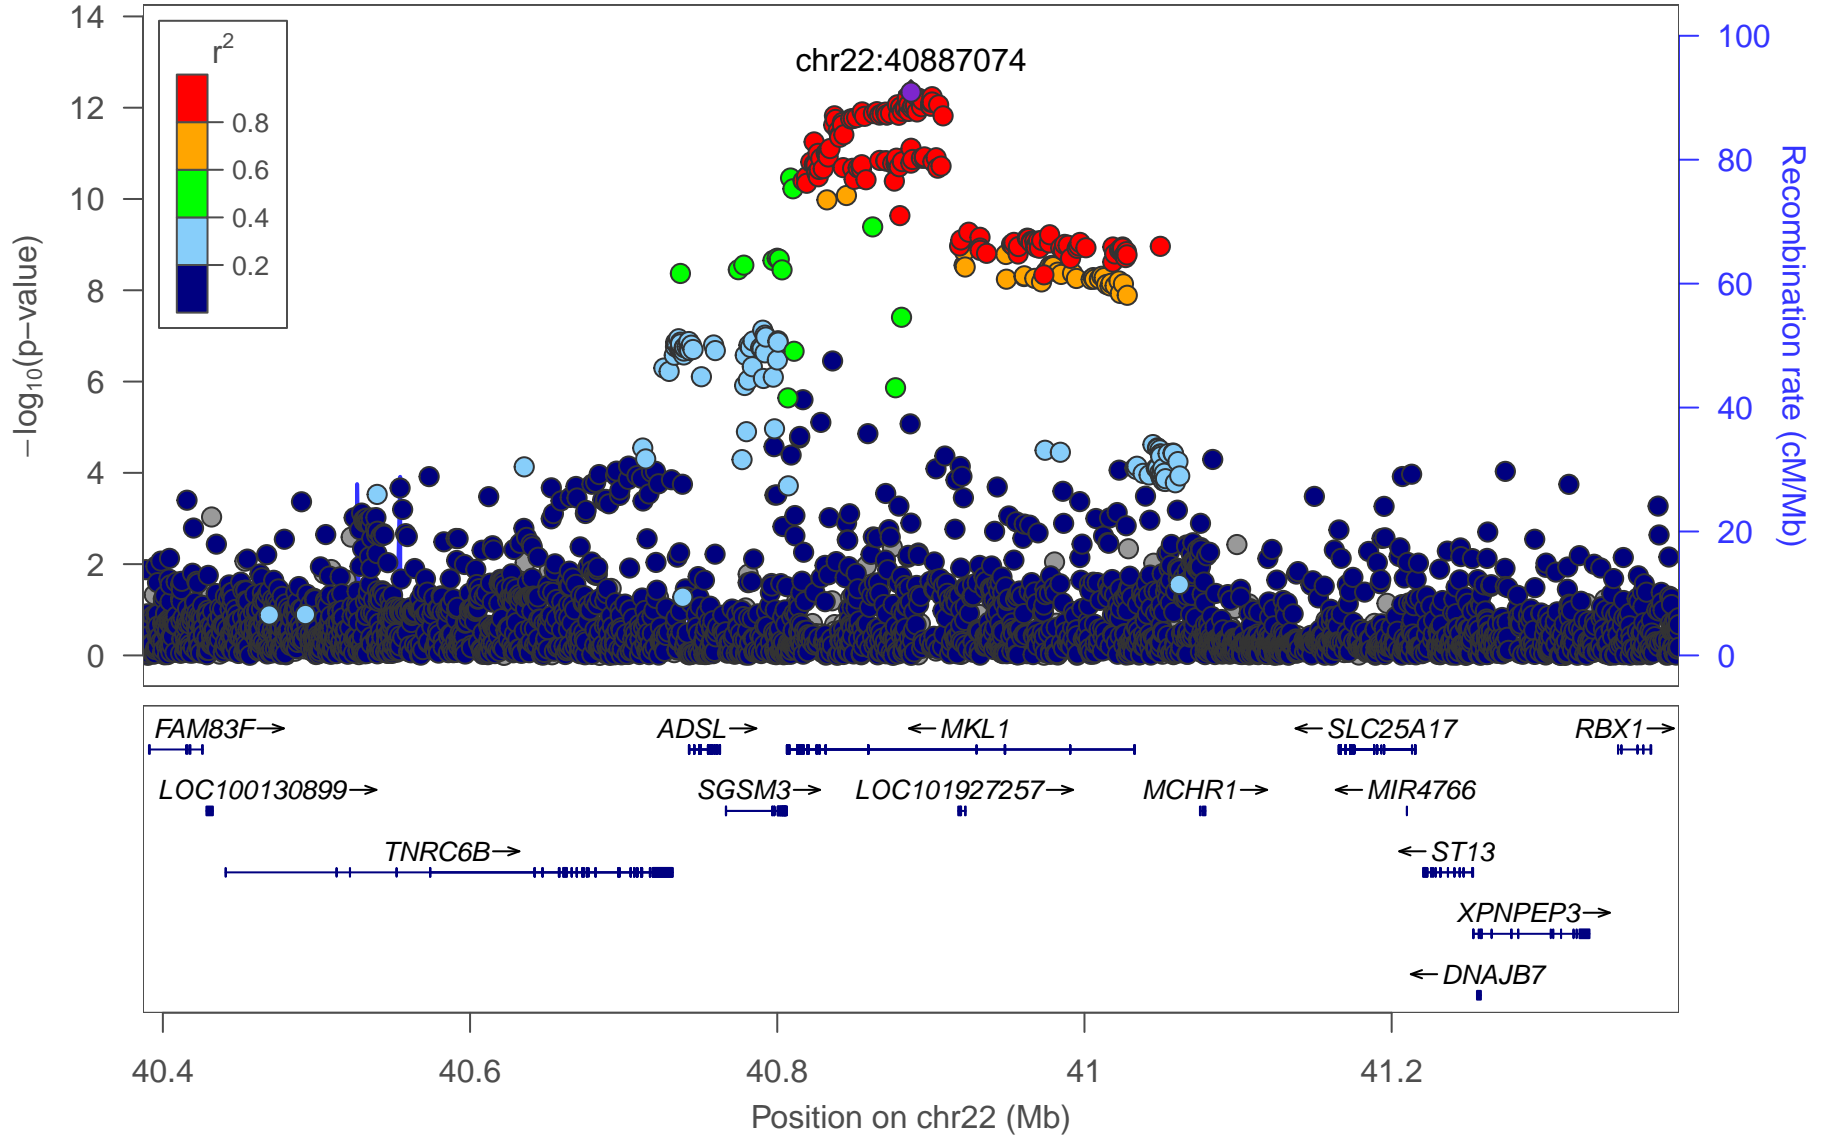

# 22\_6:IDL-CE\_percent

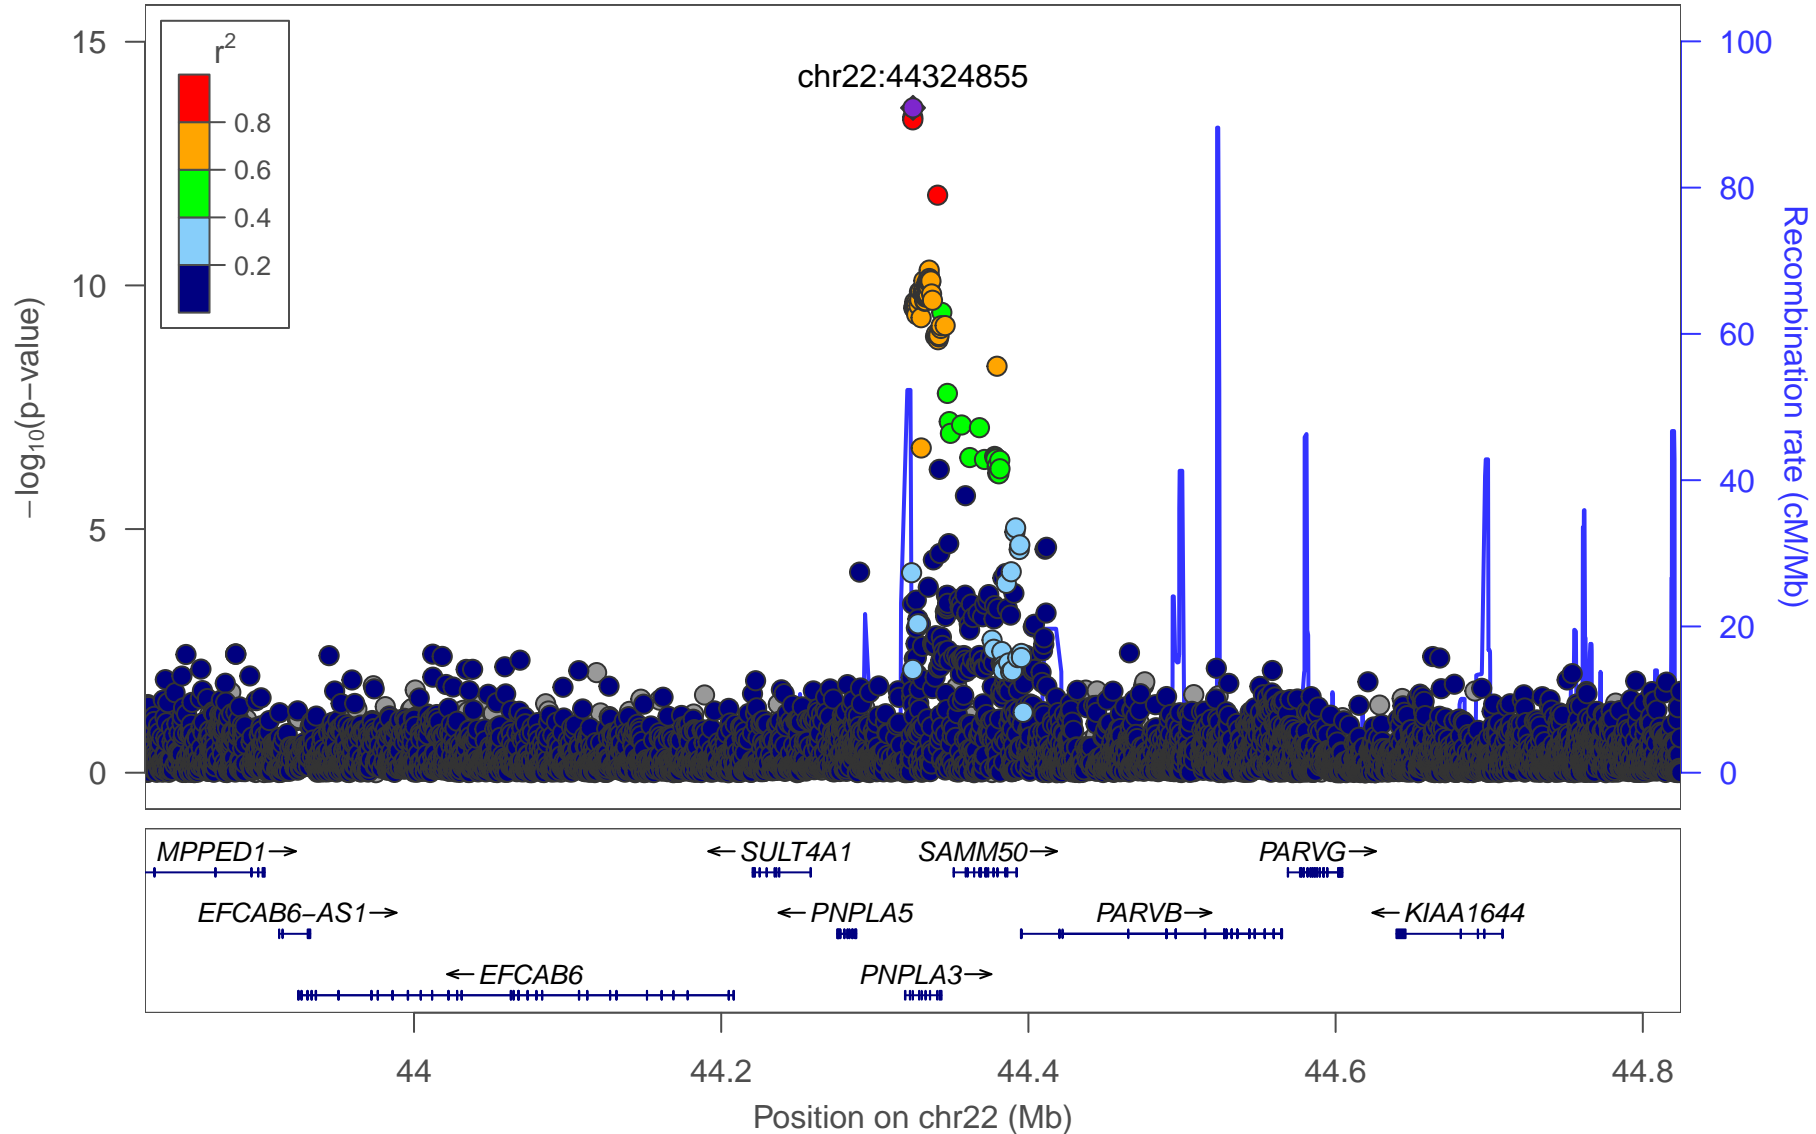

Supplement: 41586_2024_7148_MOESM4_ESM.pdf [file 41586_2024_7148_MOESM4_ESM.pdf]
