# Supplementary material for: Genome-wide characterization of circulating metabolic biomarkers
Source: PubMed Central journal article supplement (PMC10990933; doi:10.1038/s41586-024-07148-y), 2024-03-06

chr1:936210:A Ala

P-value

EAF

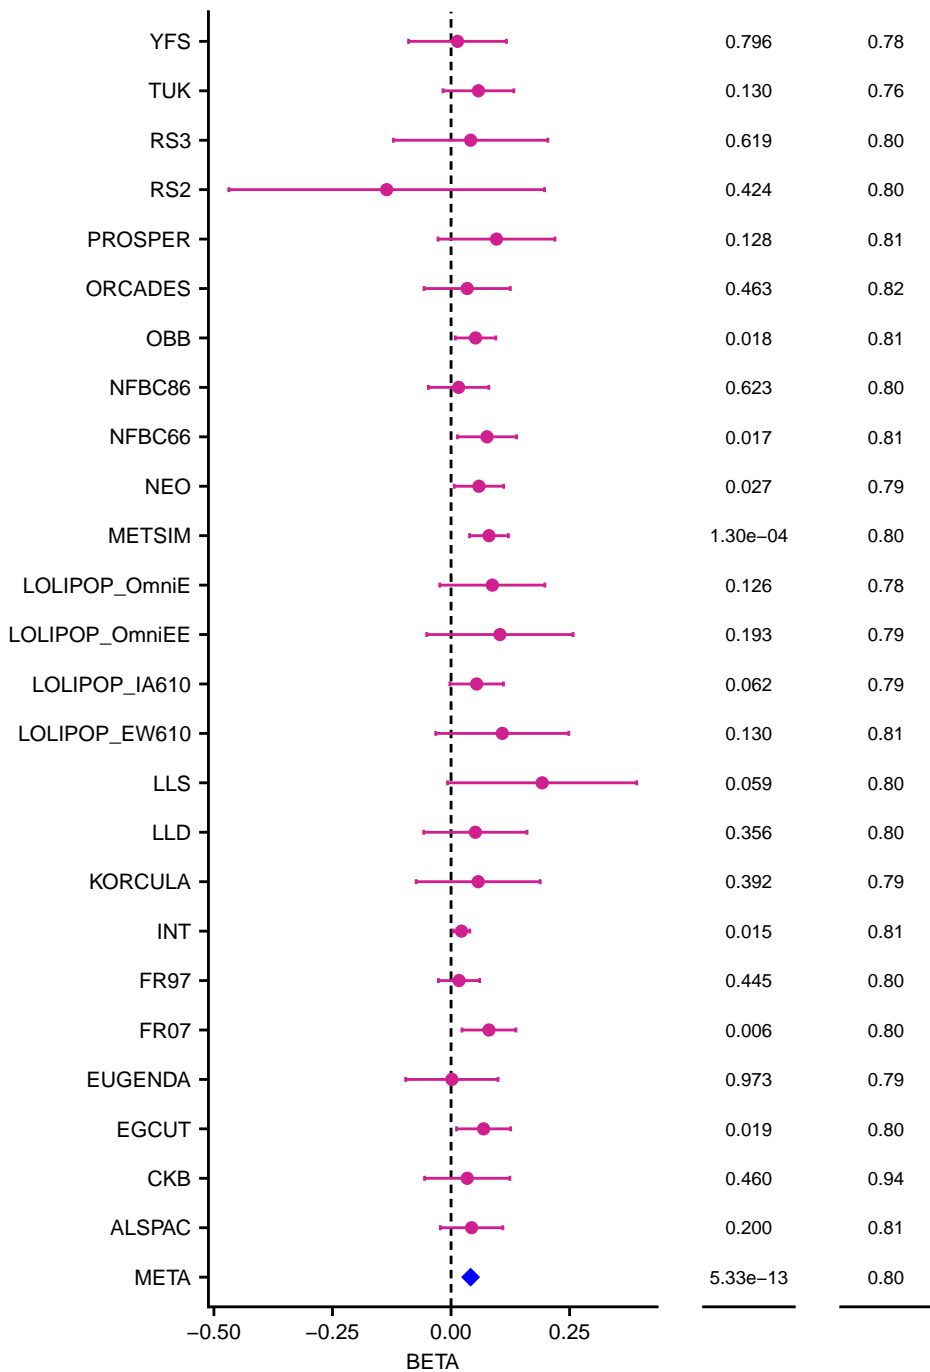

## chr1:2332391:T LAbbyFA

P-value

EAF

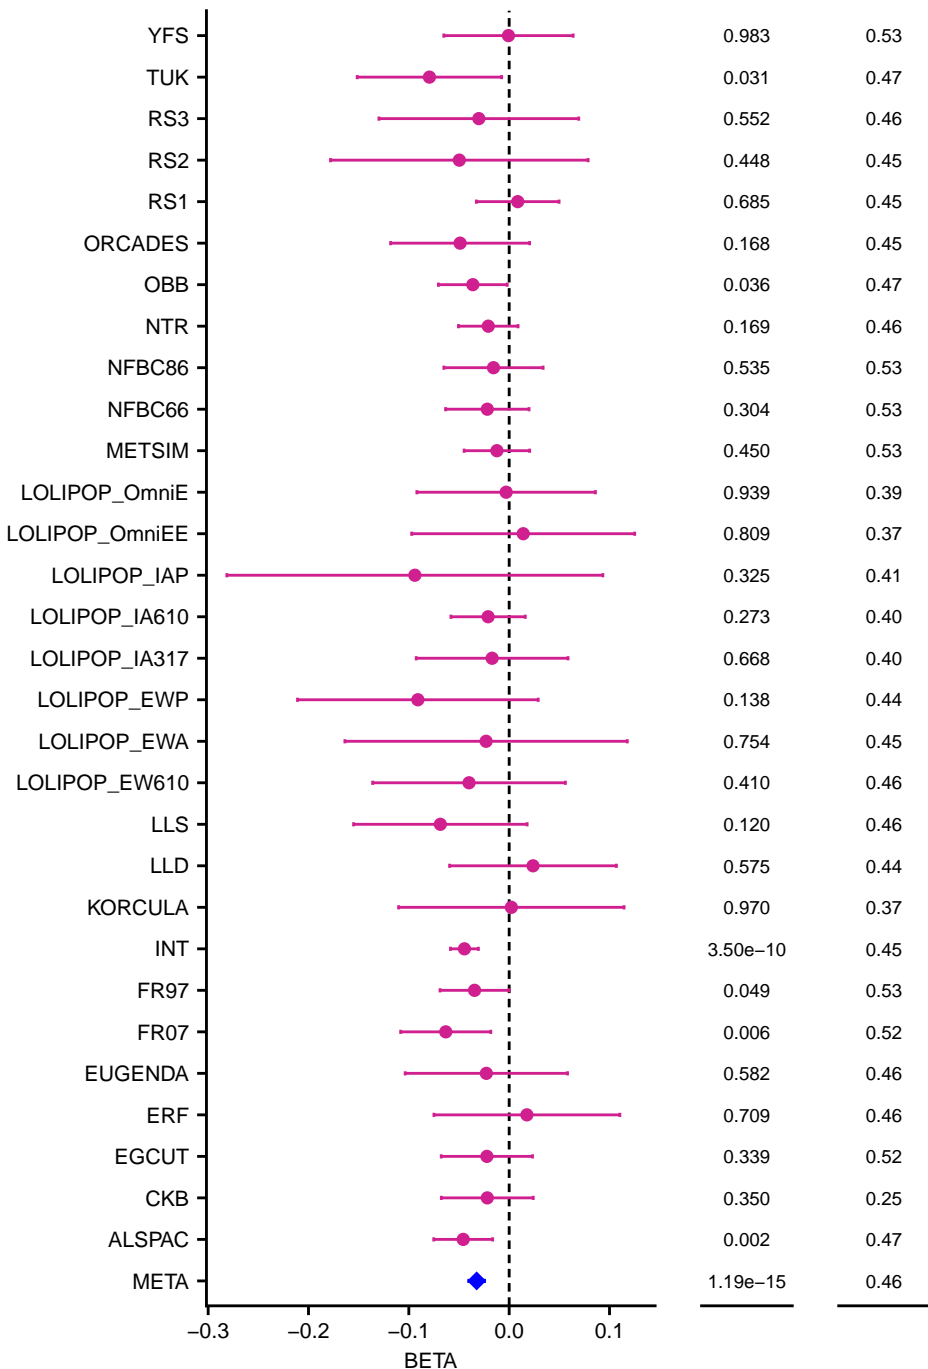

chr1:16065188:T Ala

P-value

EAF

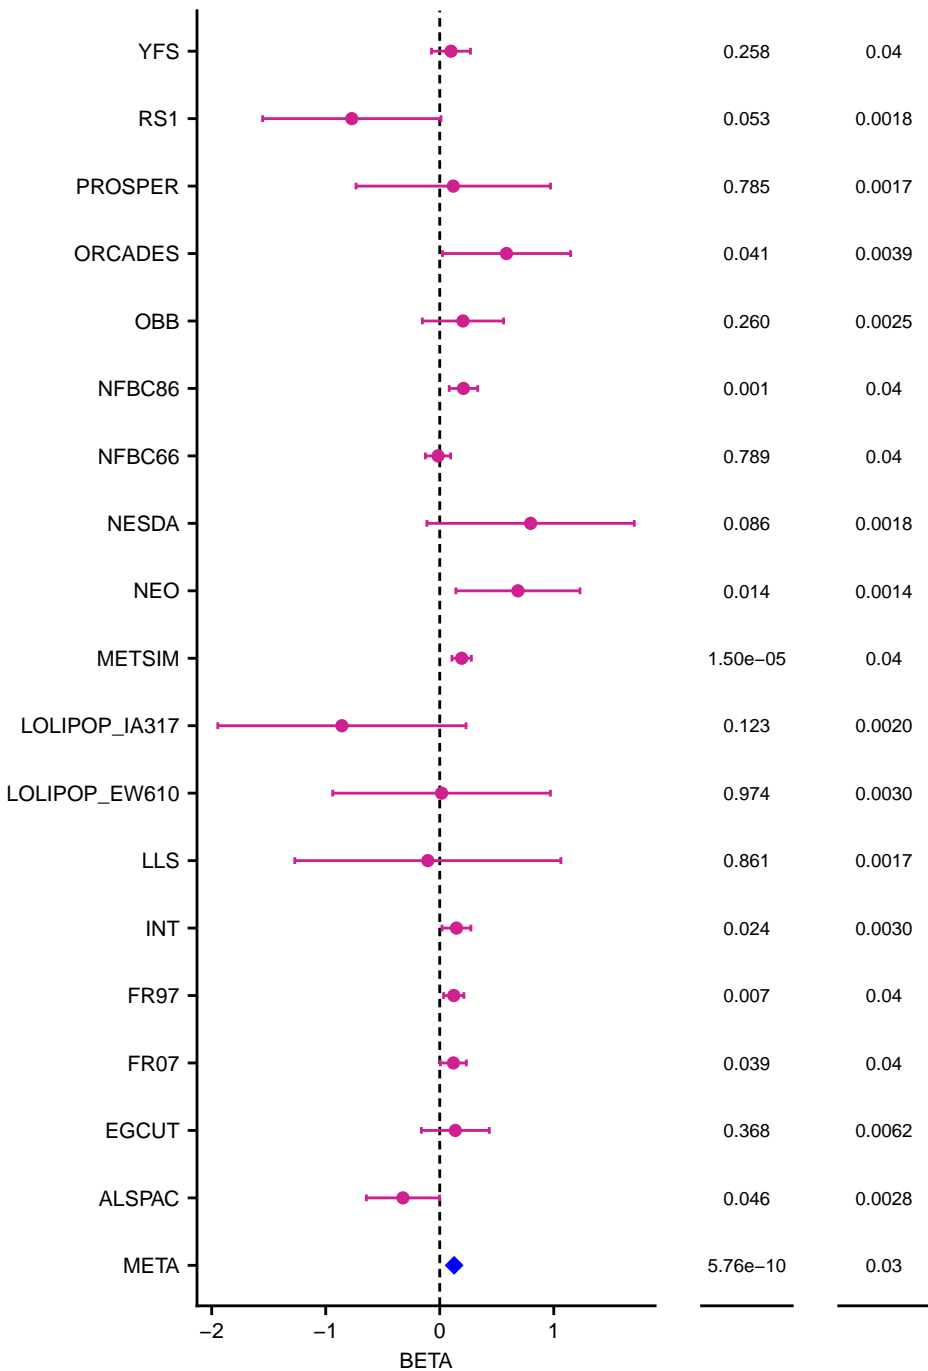

## chr1:20916444:A S-HDL-FC

P-value

EAF

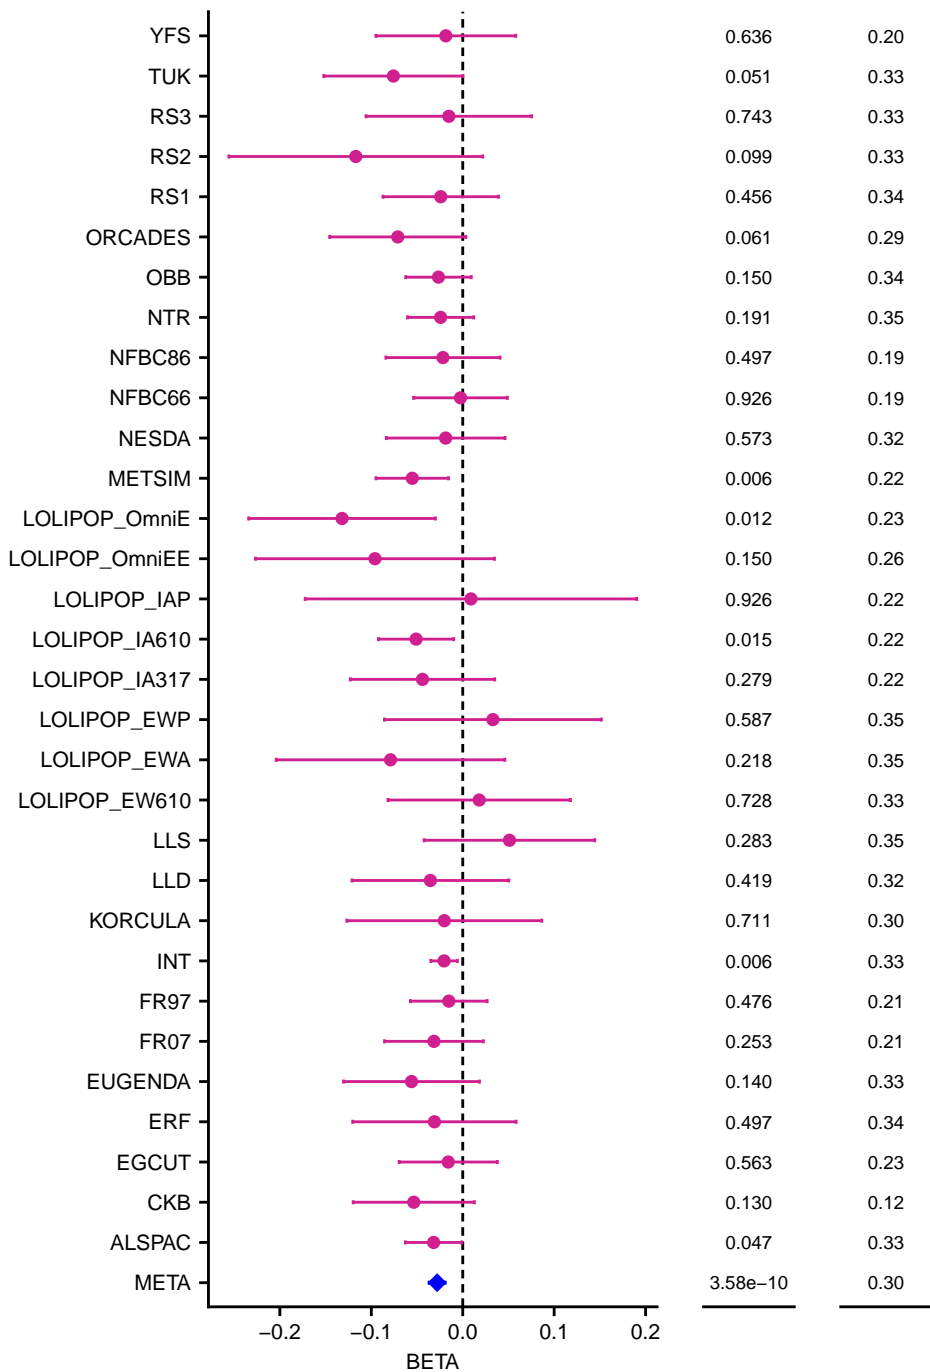

chr1:23703118:C Crea

P-value

EAF

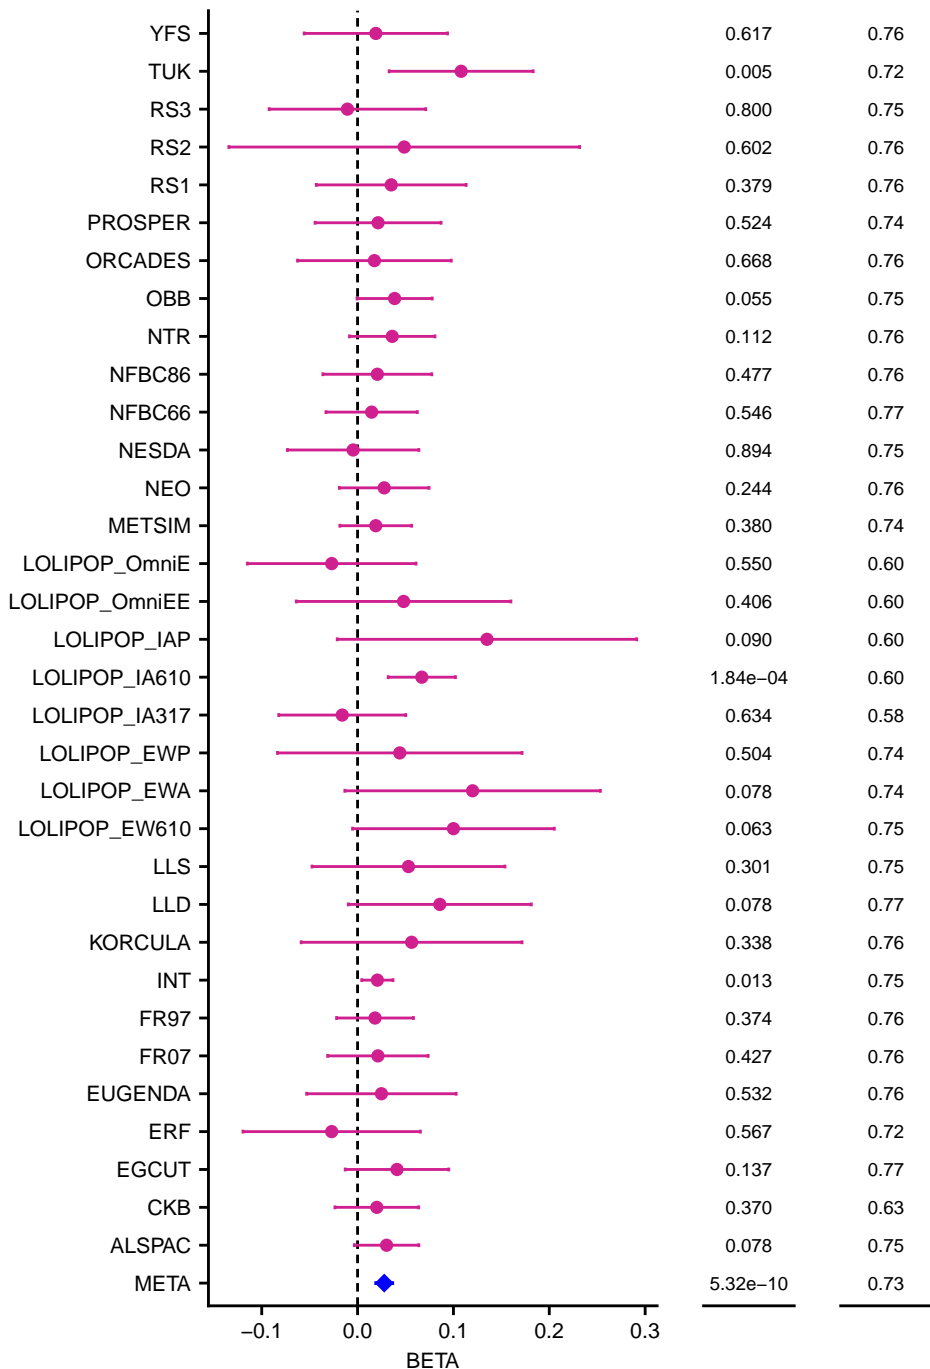

chr1:25777743:T M-LDL-P

P-value

EAF

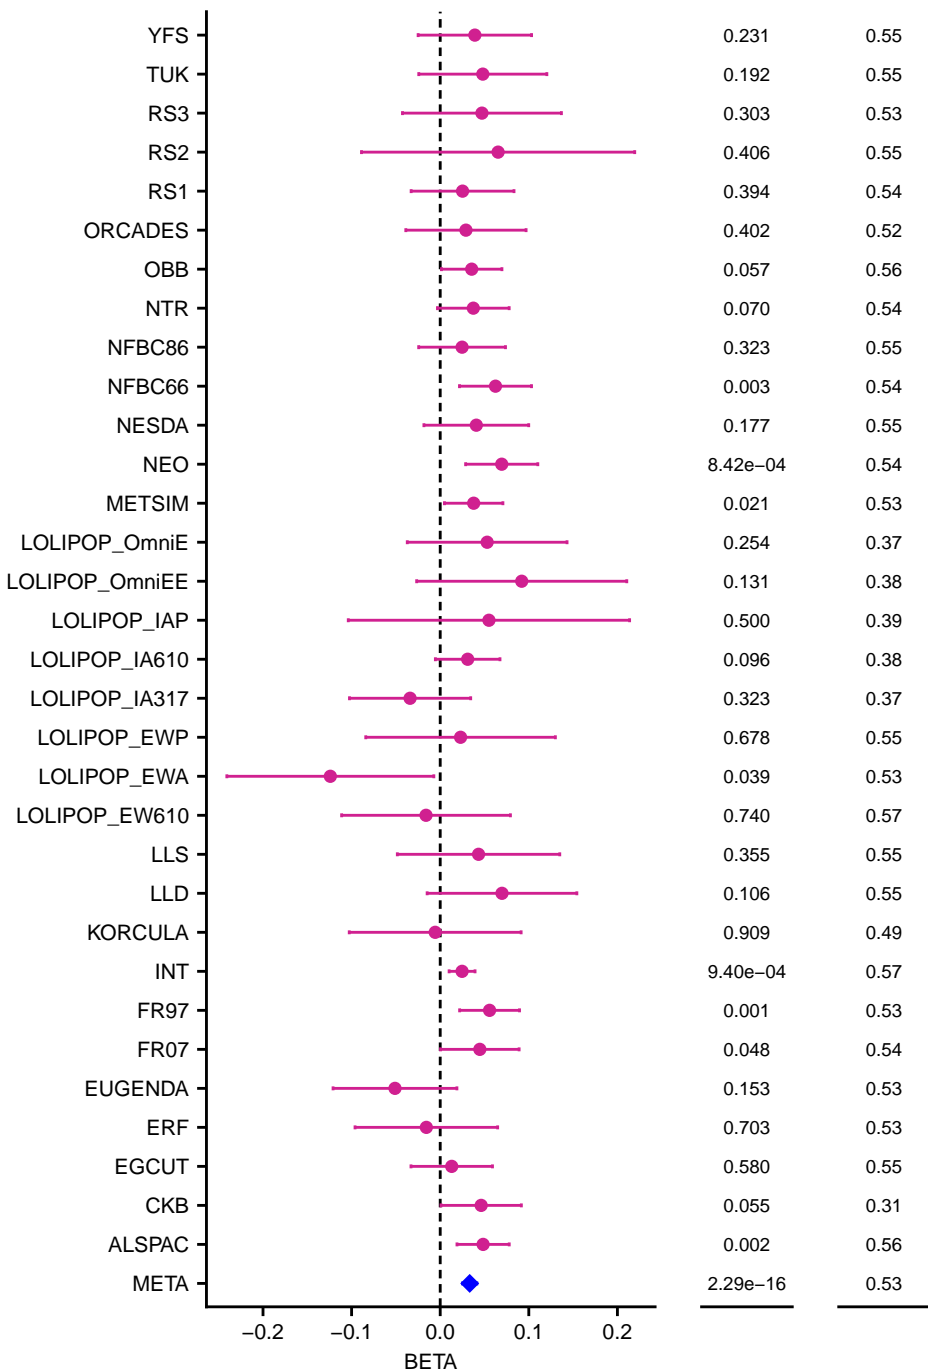

## chr1:27284913:T ApoBbyApoA1

P-value

EAF

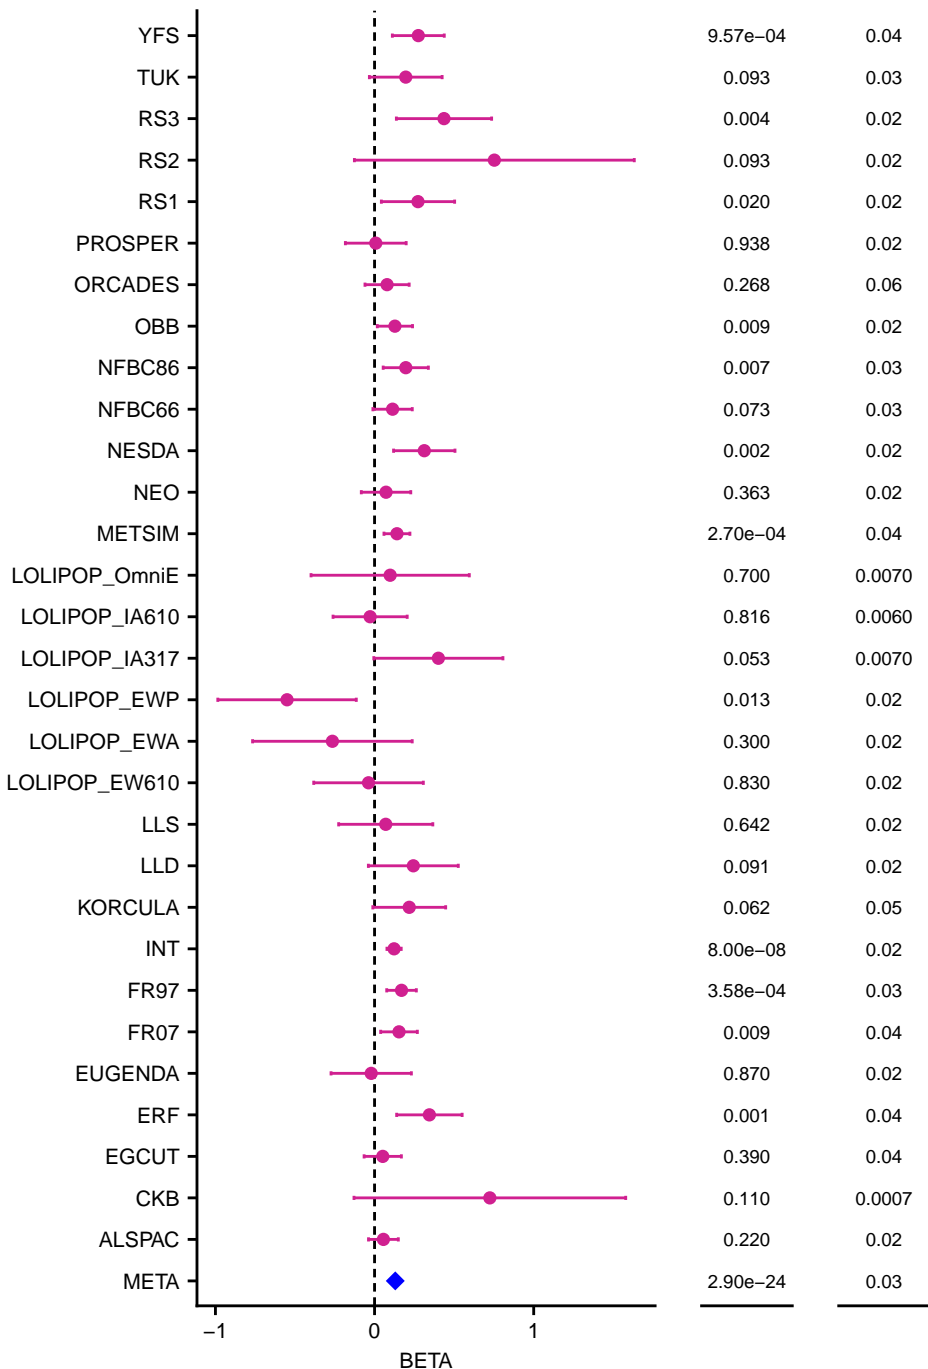

chr1:39623307:A HDL2-C

P-value

EAF

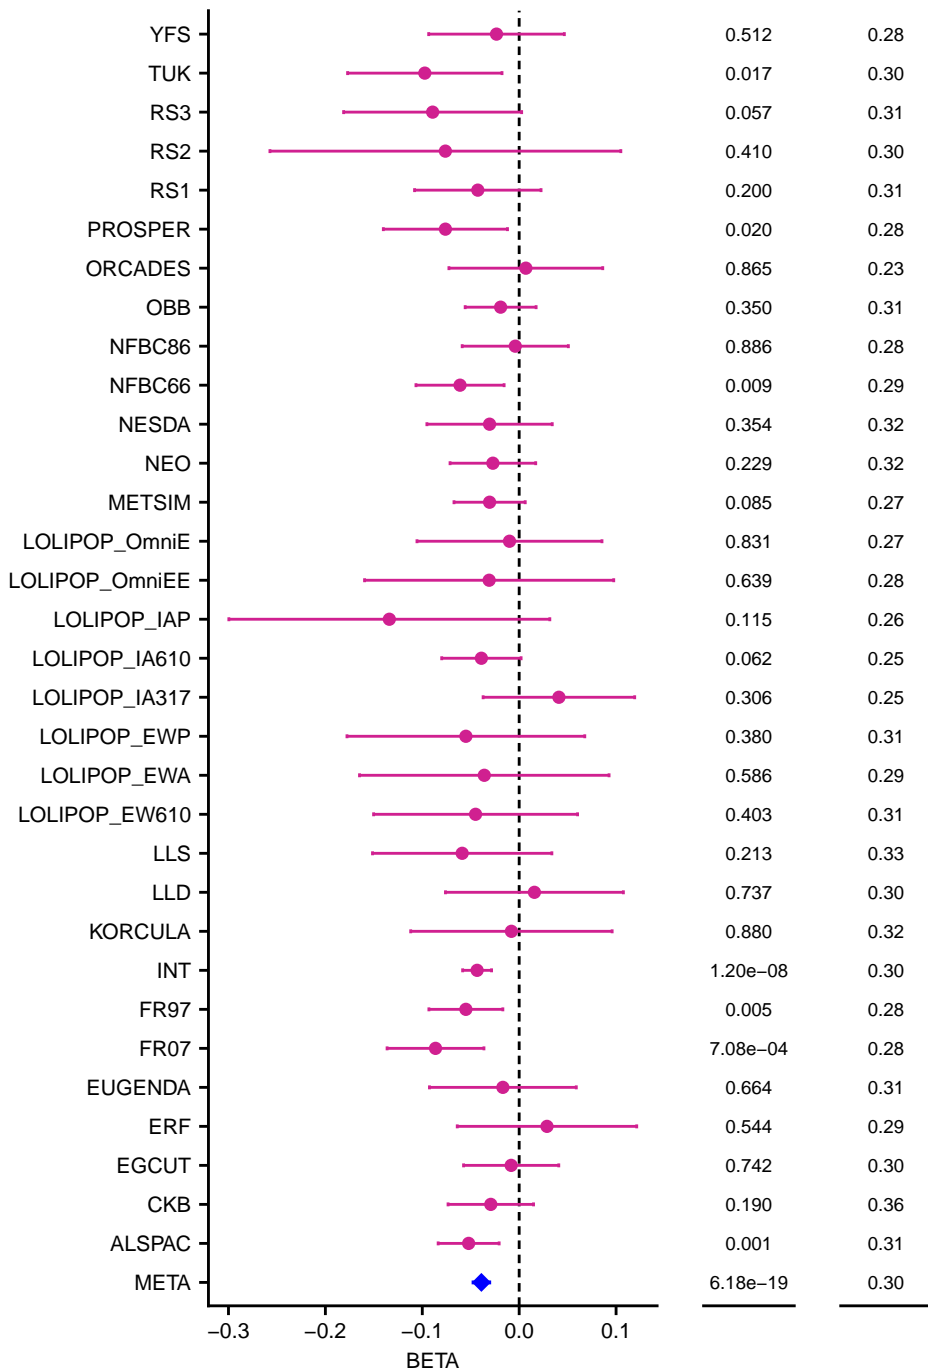



## chr1:55505647:T IDL-FC

P-value

EAF

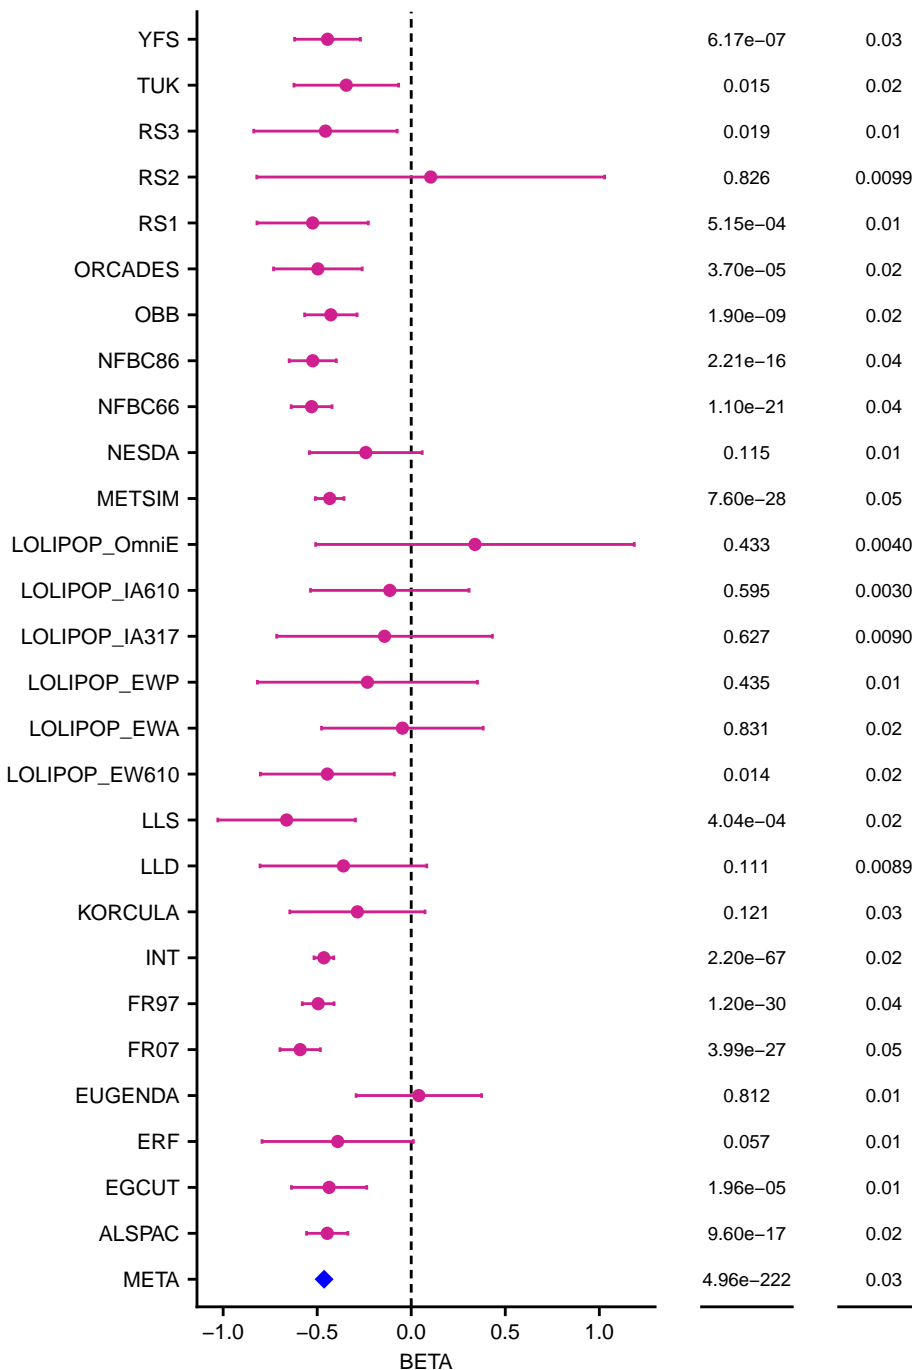

## chr1:62936912:T M-HDL-TG

P-value

EAF

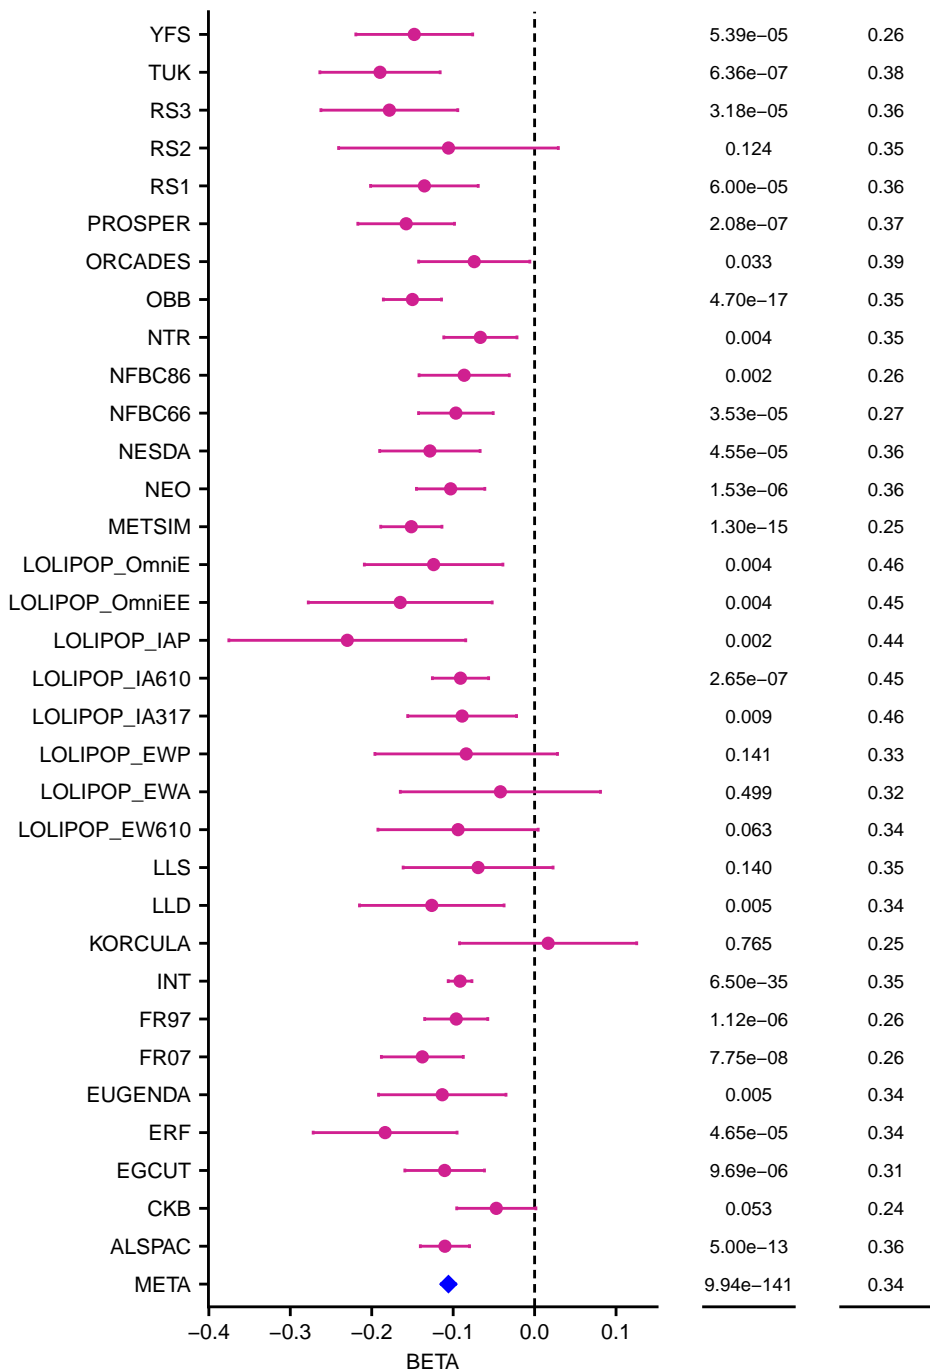

chr1:76217169:A Gly

P-value

EAF

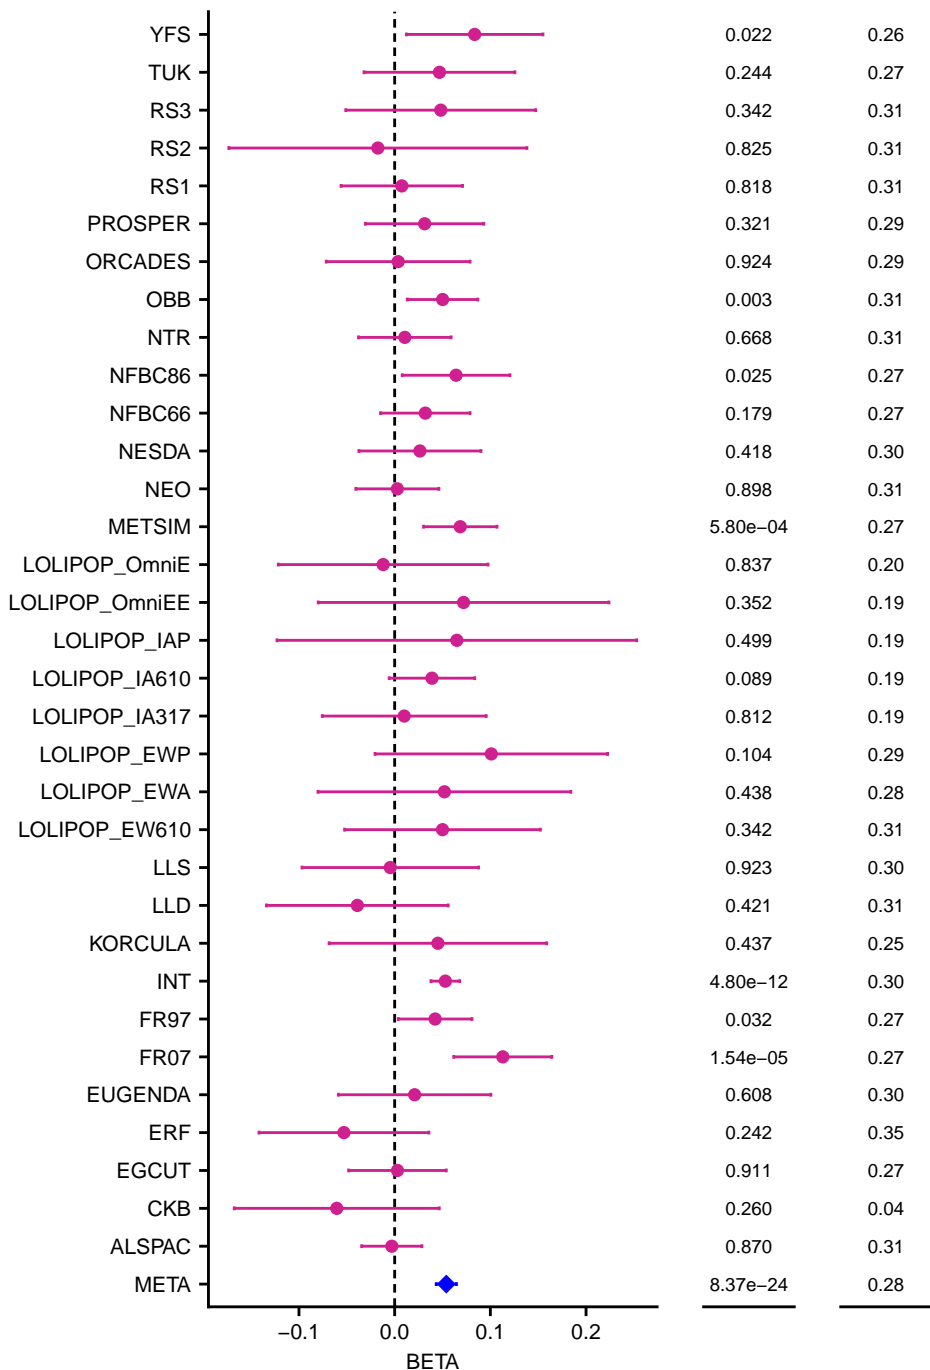

## chr1:93822349:C XL-HDL-FC

P-value

EAF

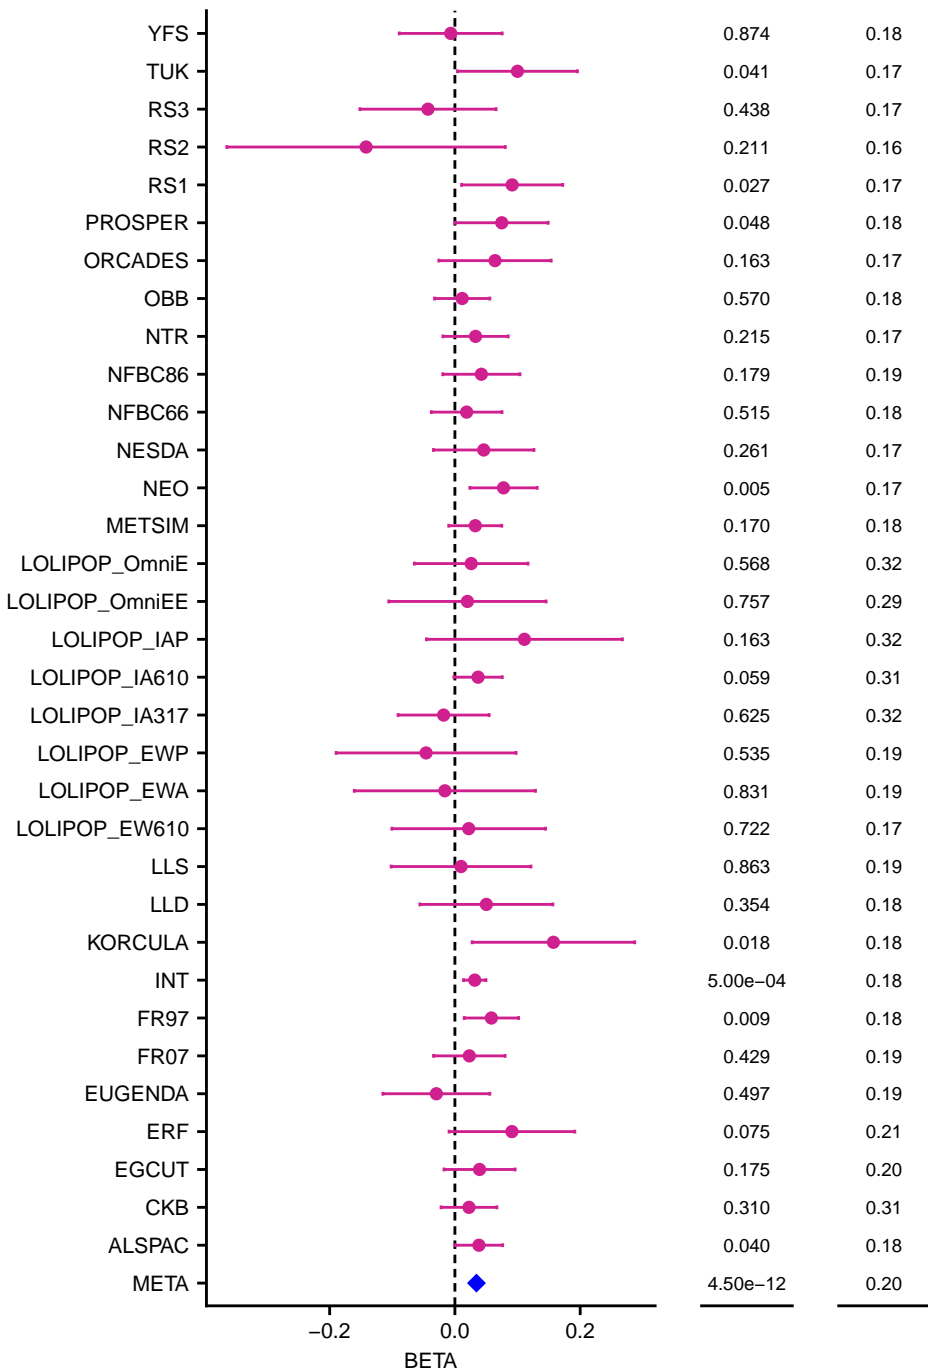

chr1:100643910:A Leu

P-value

EAF

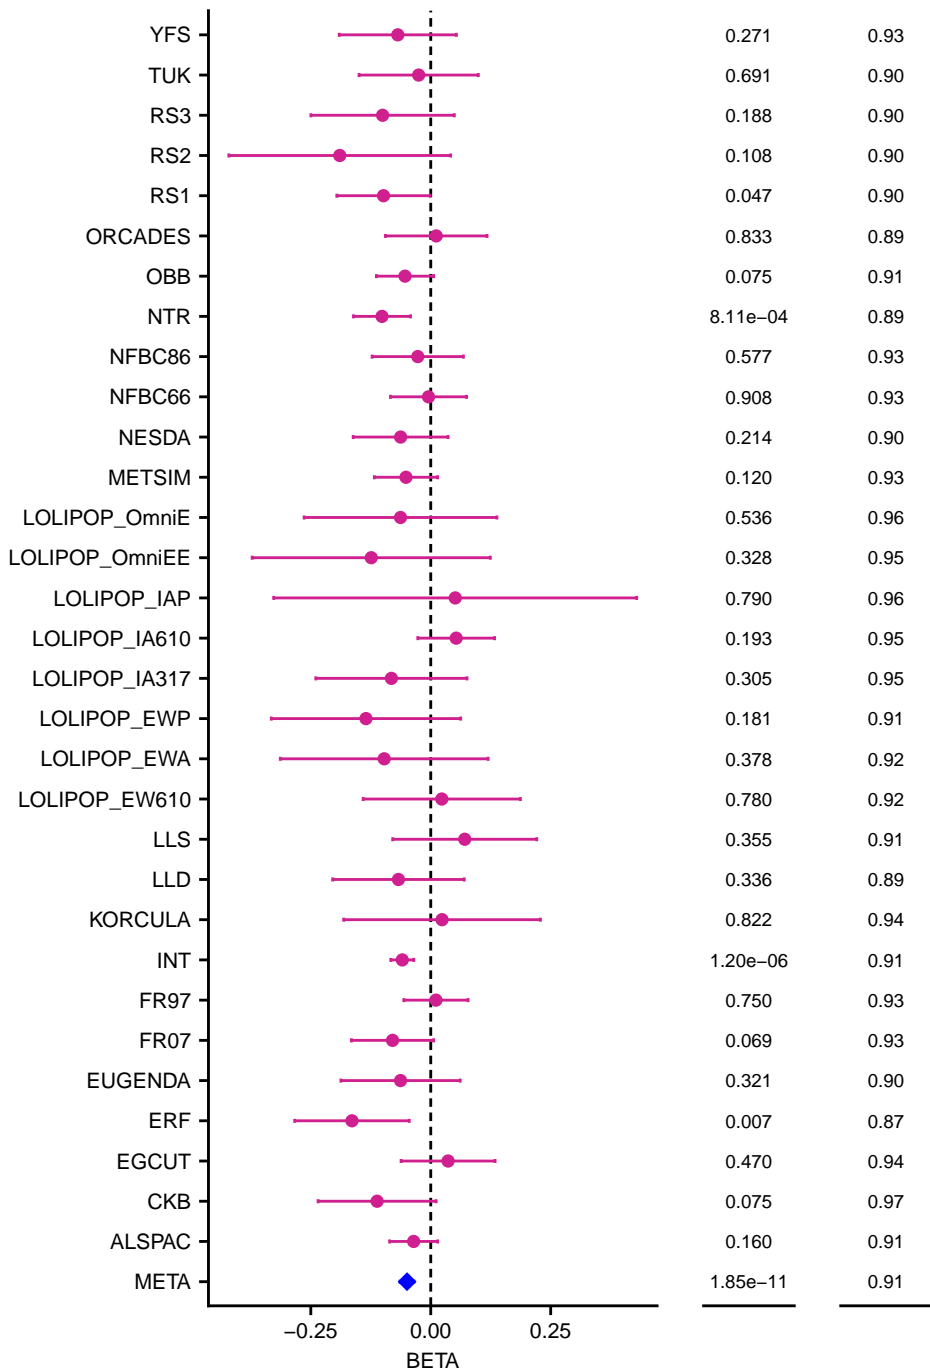

chr1:109818530:T S-LDL-CE

P-value

EAF

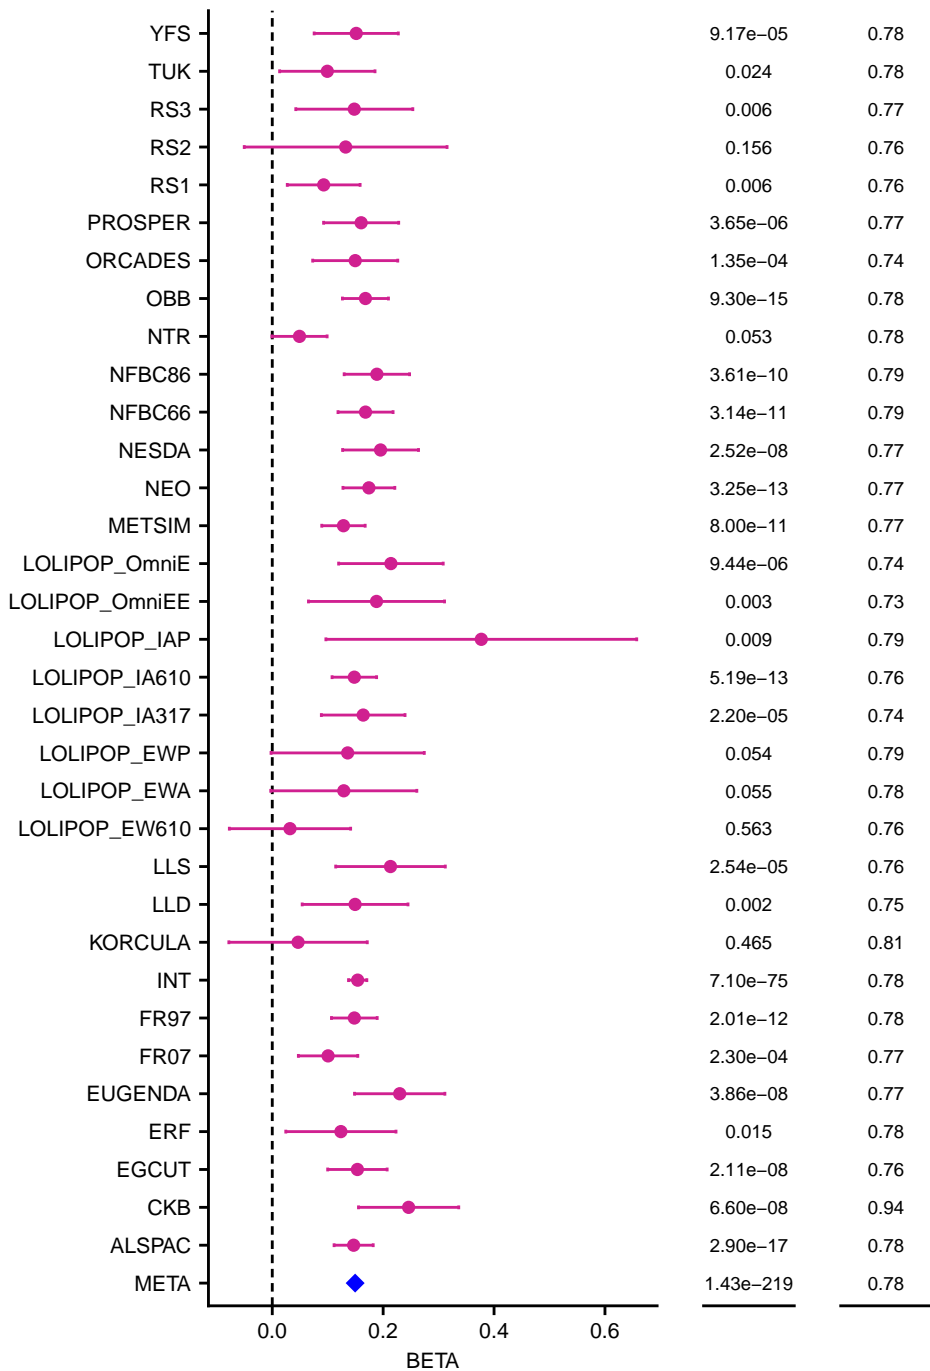

chr1:120254506:A Gly

P-value

EAF

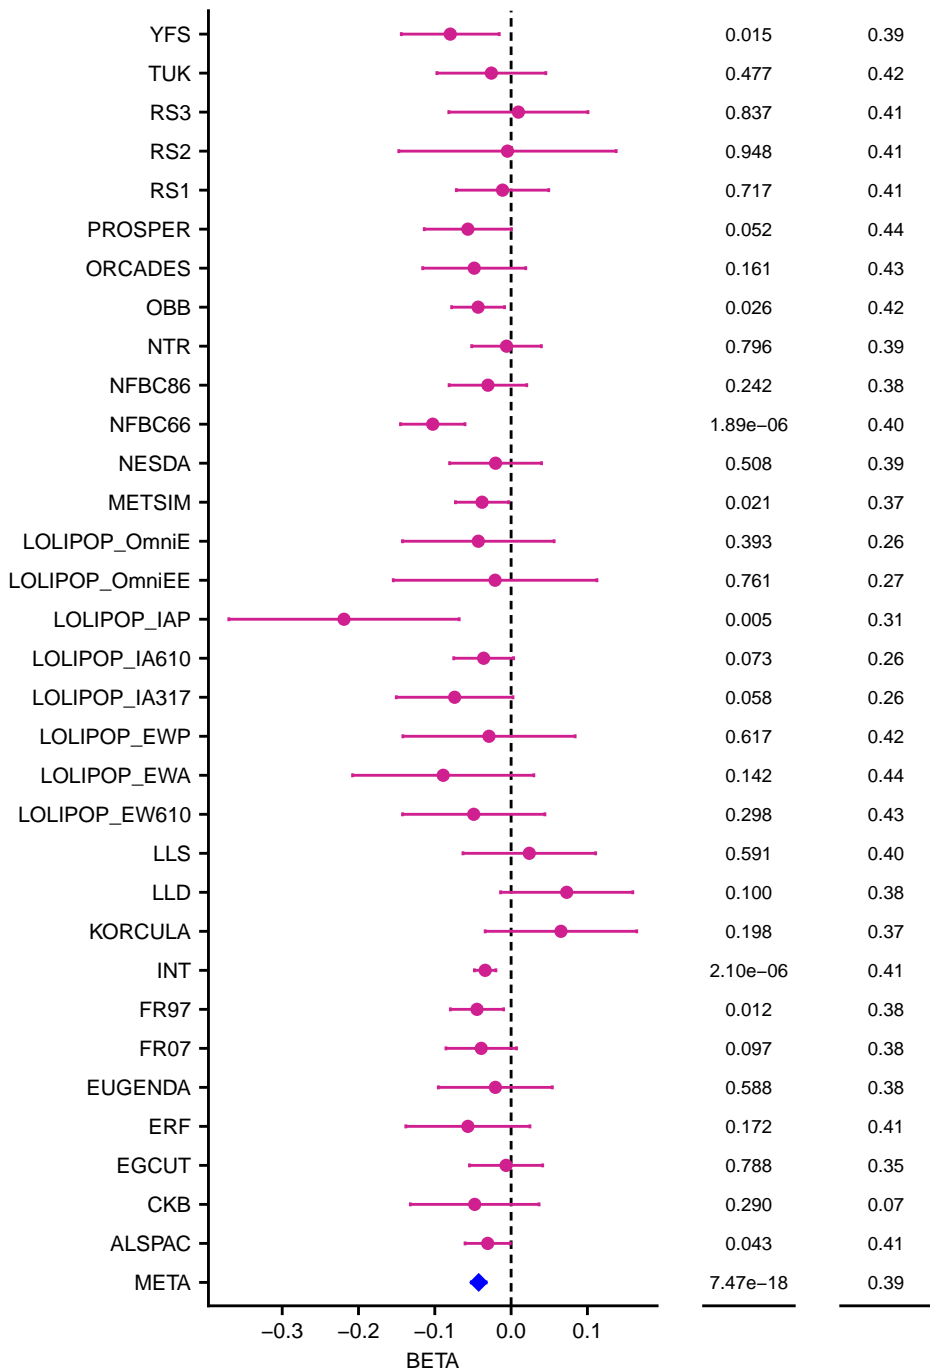

chr1:150842696:T S-HDL-PL

P-value

EAF

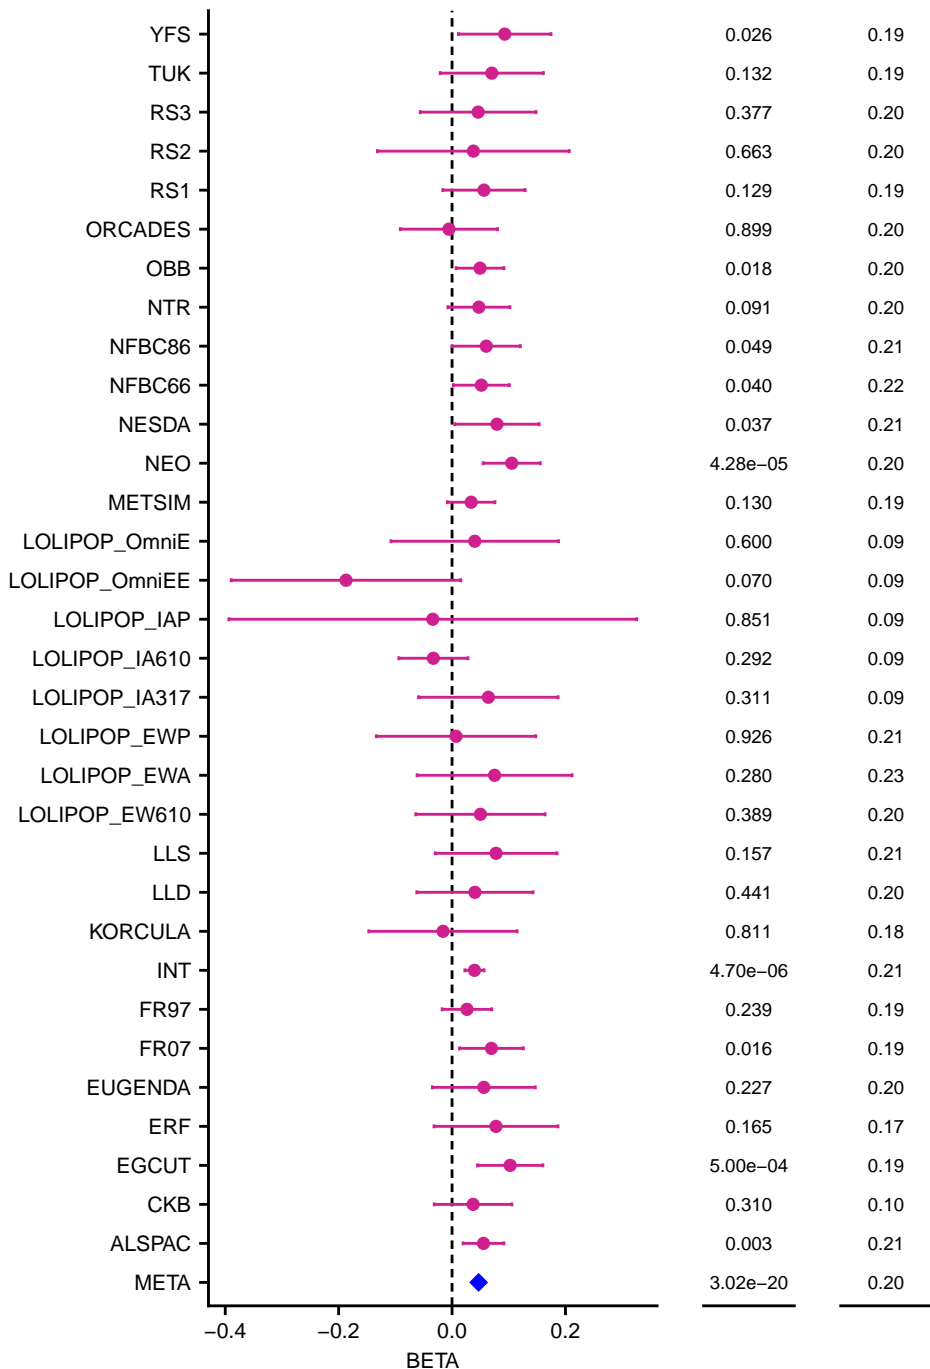



chr1:155033308:A Alb

P-value

EAF

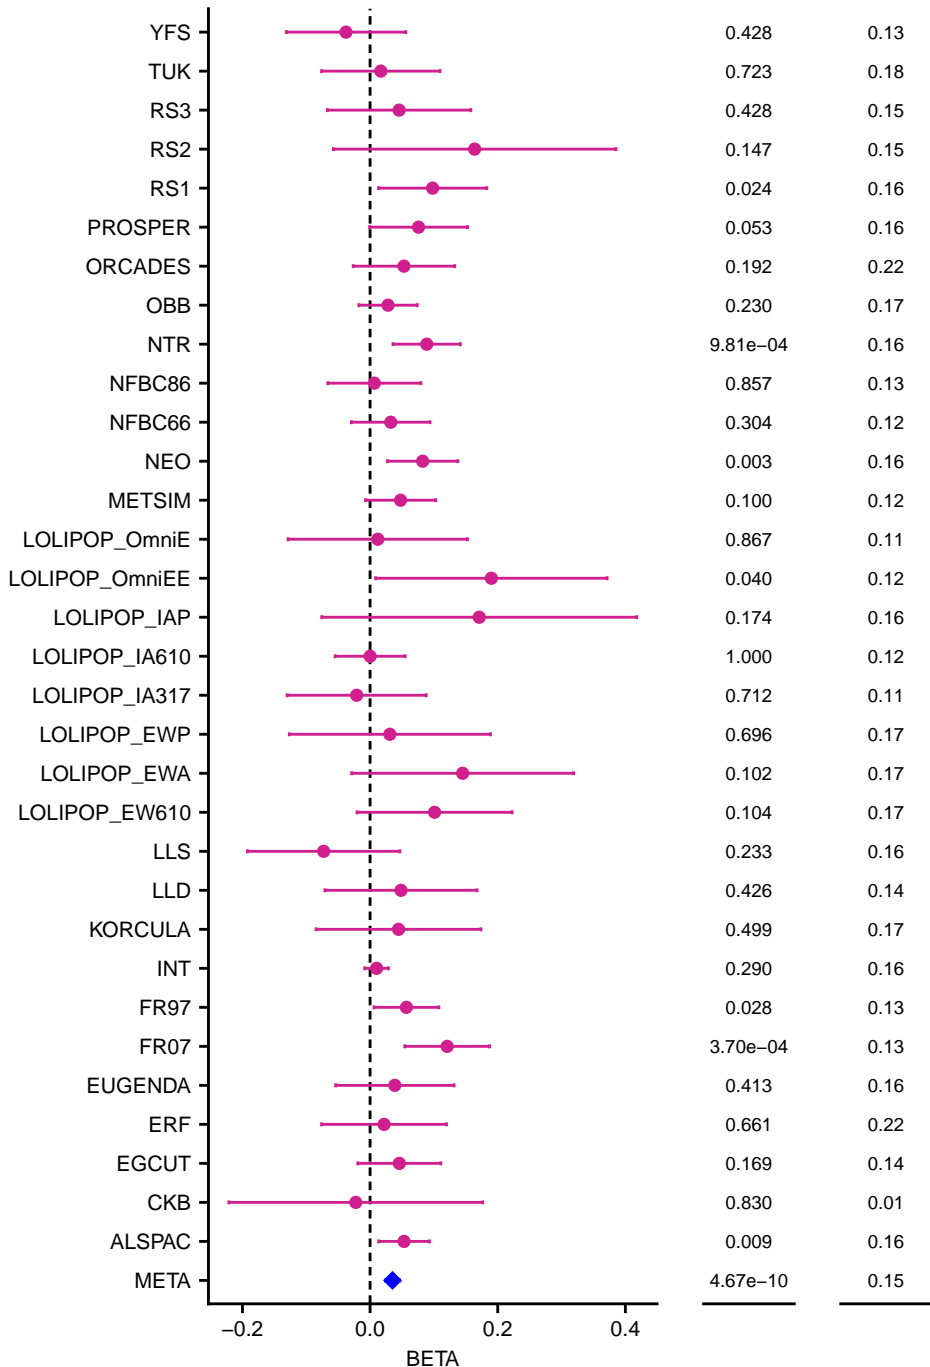

## chr1:161194641:A M-HDL-CE

P-value

EAF

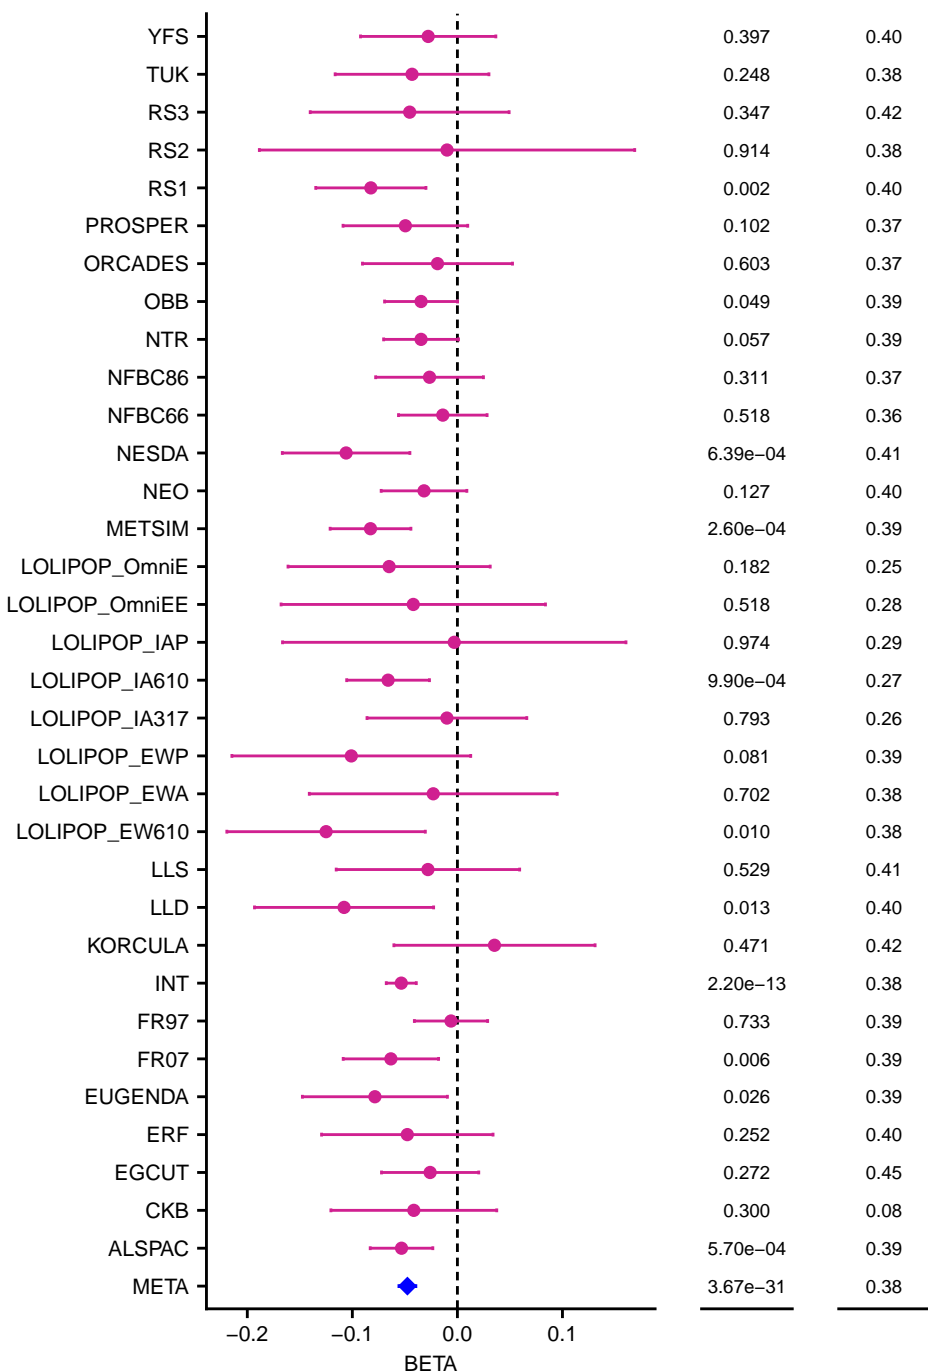

chr1:167901238:T XL-VLDL-C\_percent

P-value

EAF

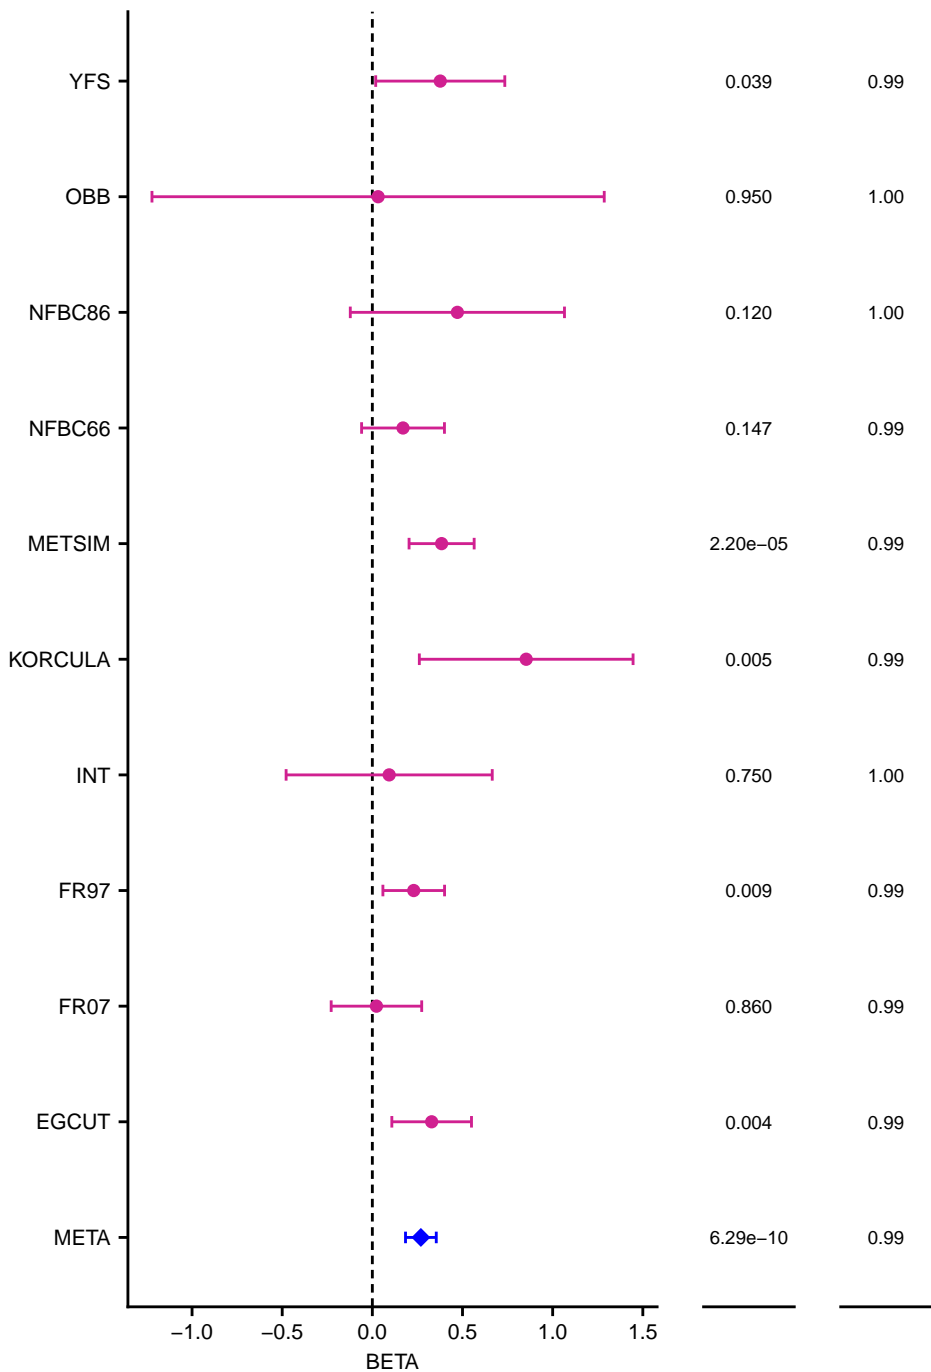

## chr1:178604633:A HDL-D

P-value

EAF

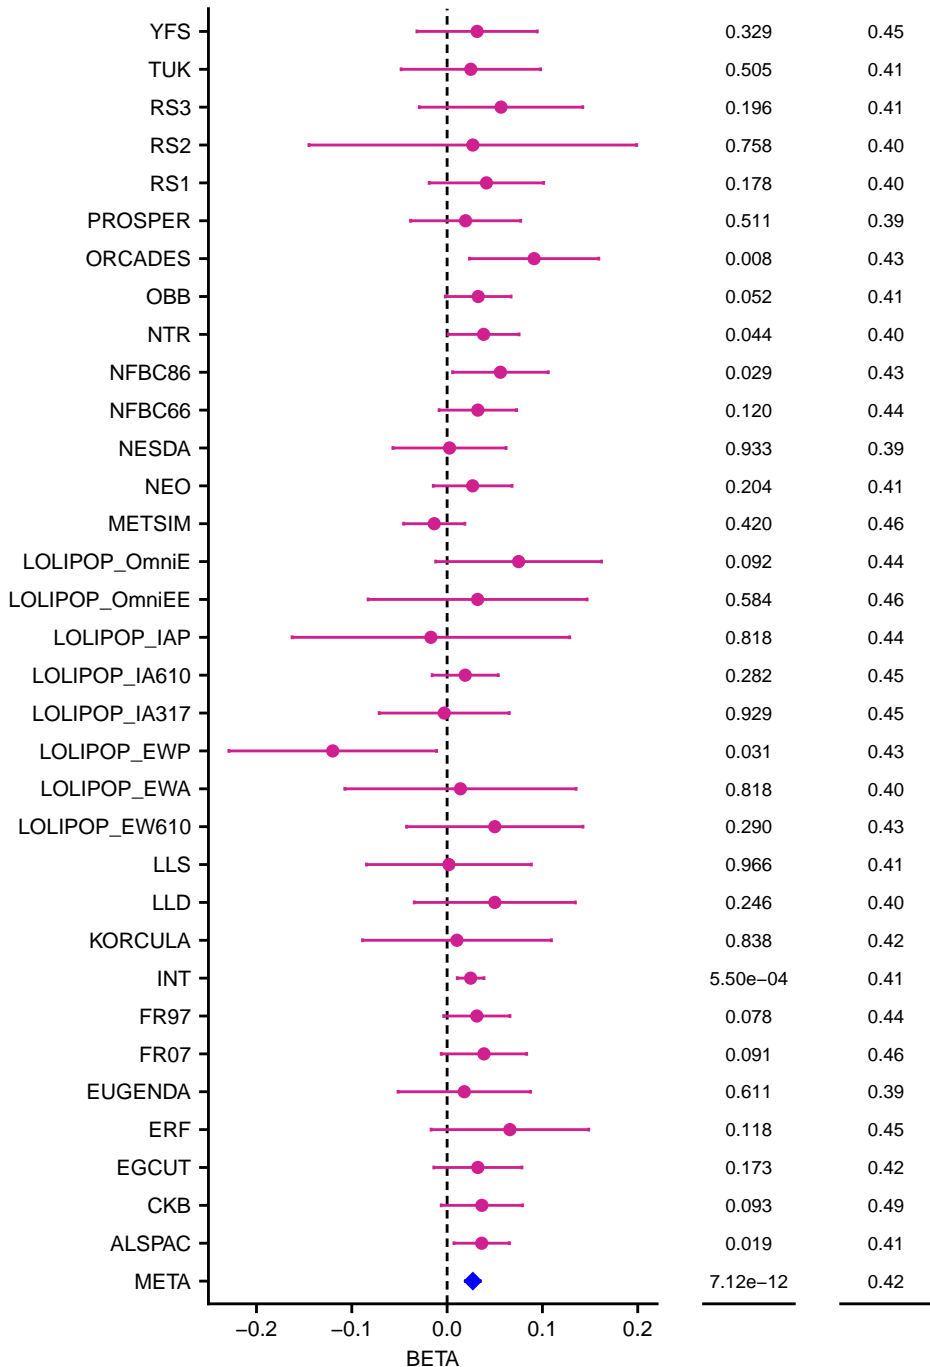

chr1:182171957:T HDL-D

P-value

EAF

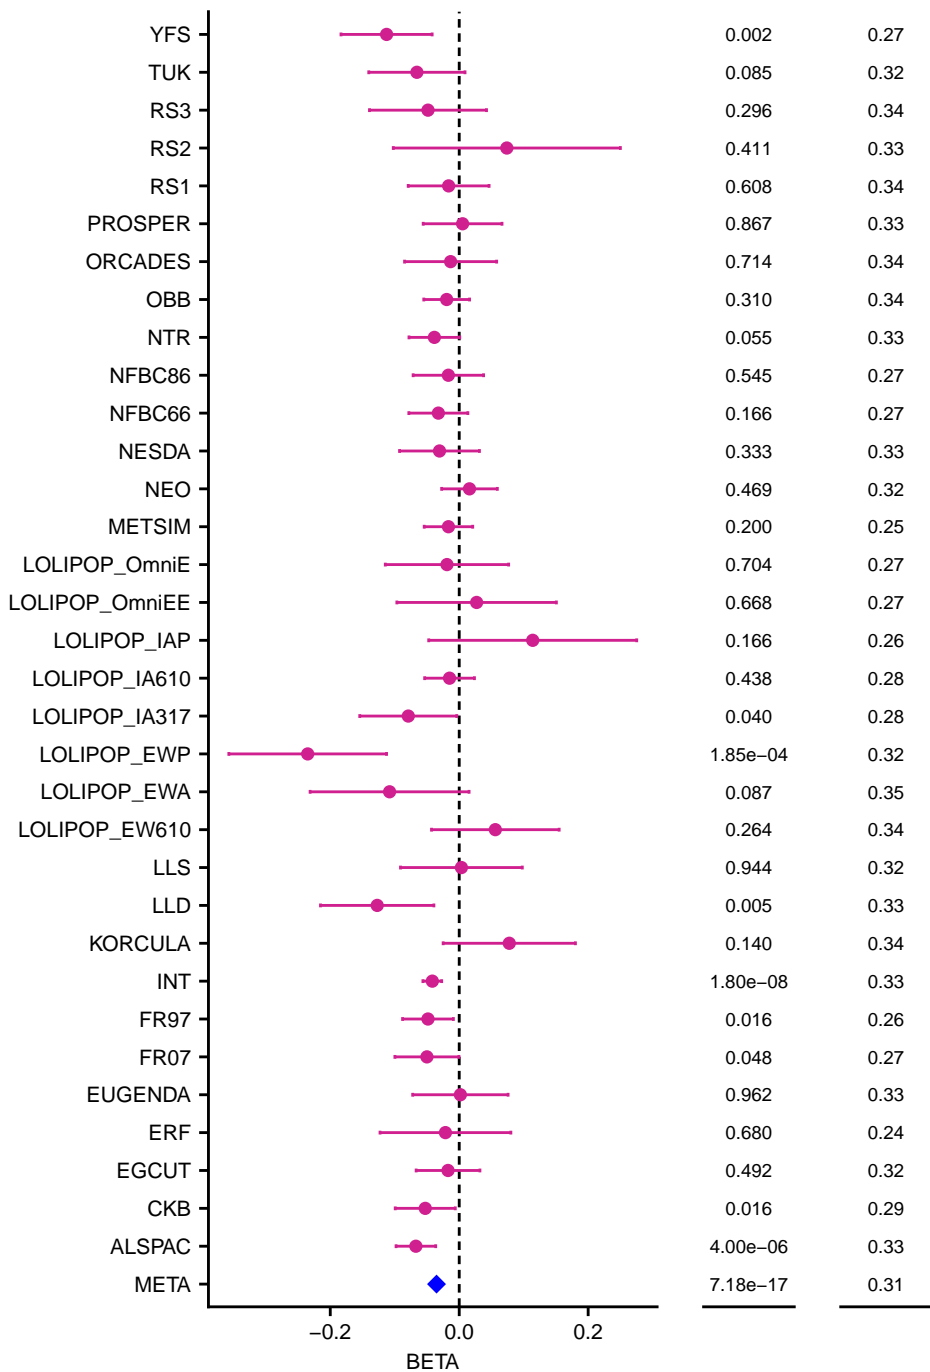

## chr1:205114873:C GlycA

P-value

EAF

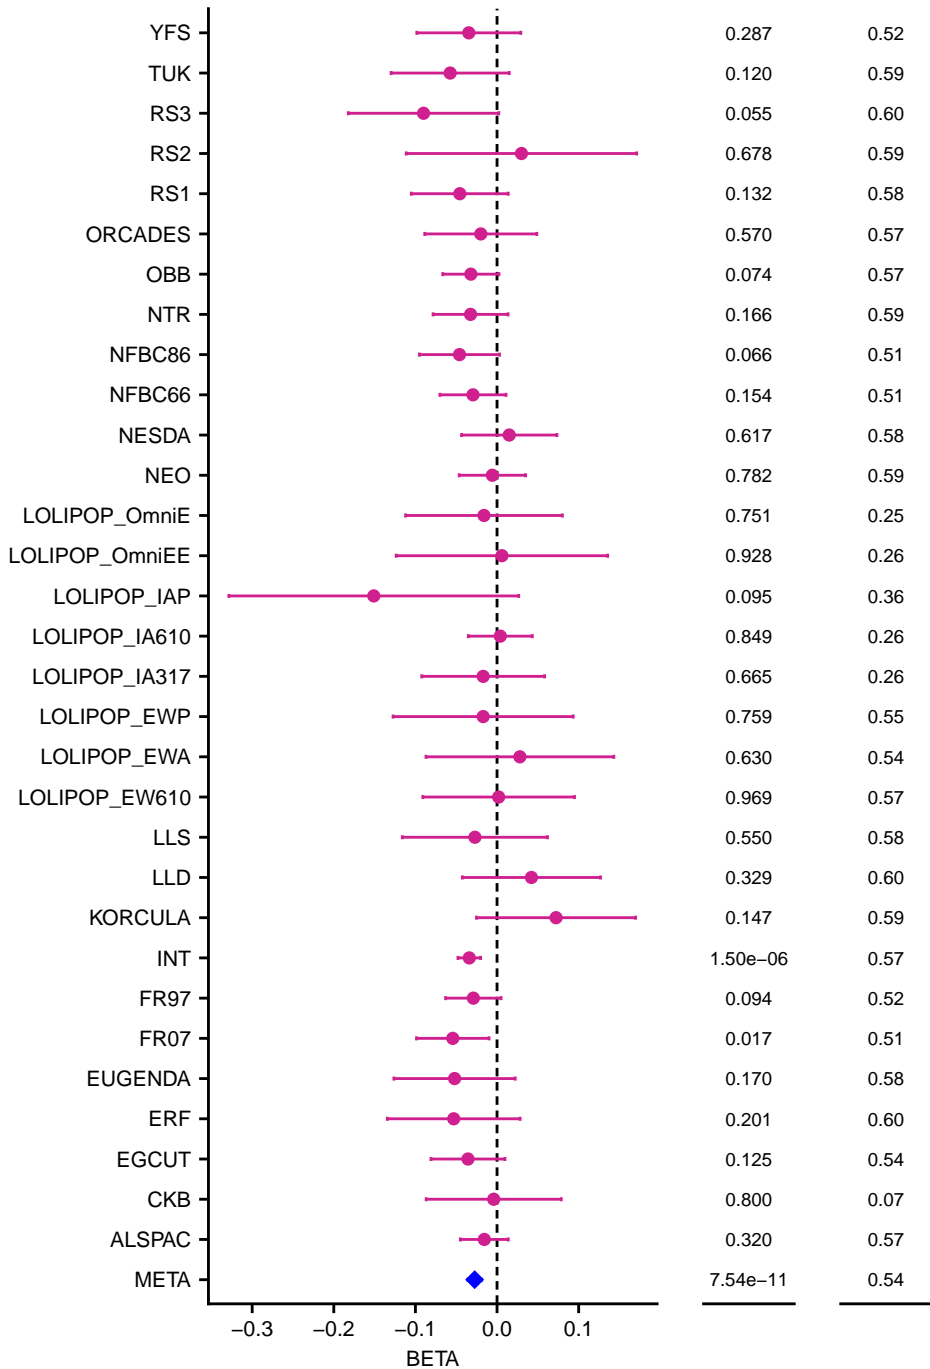

chr1:207244221:T Ala

P-value

EAF

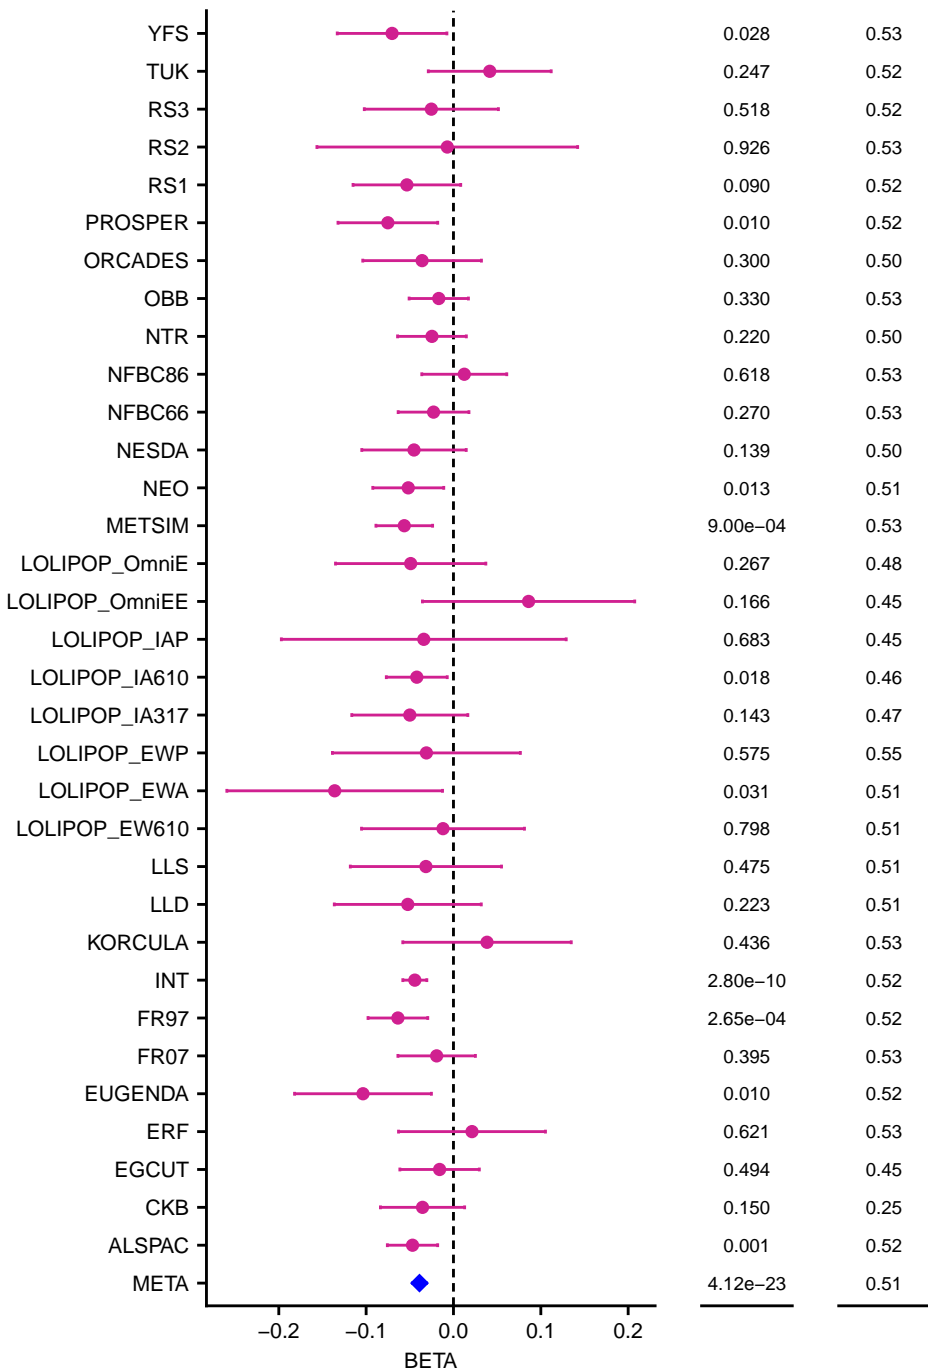

chr1:214150445:A Gln

P-value

EAF

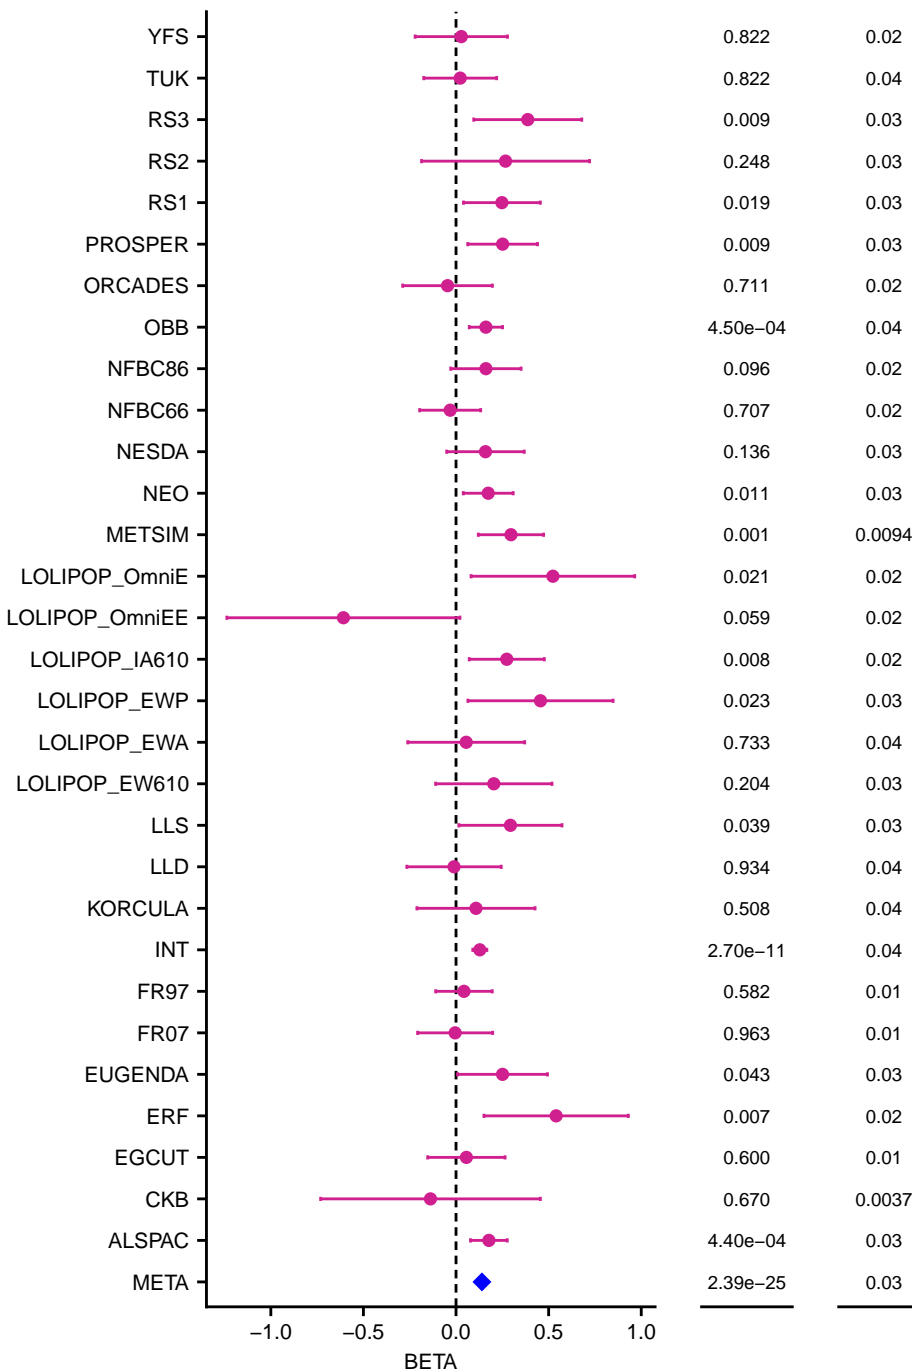



## chr1:219656701:T TGbyPG

P-value

EAF

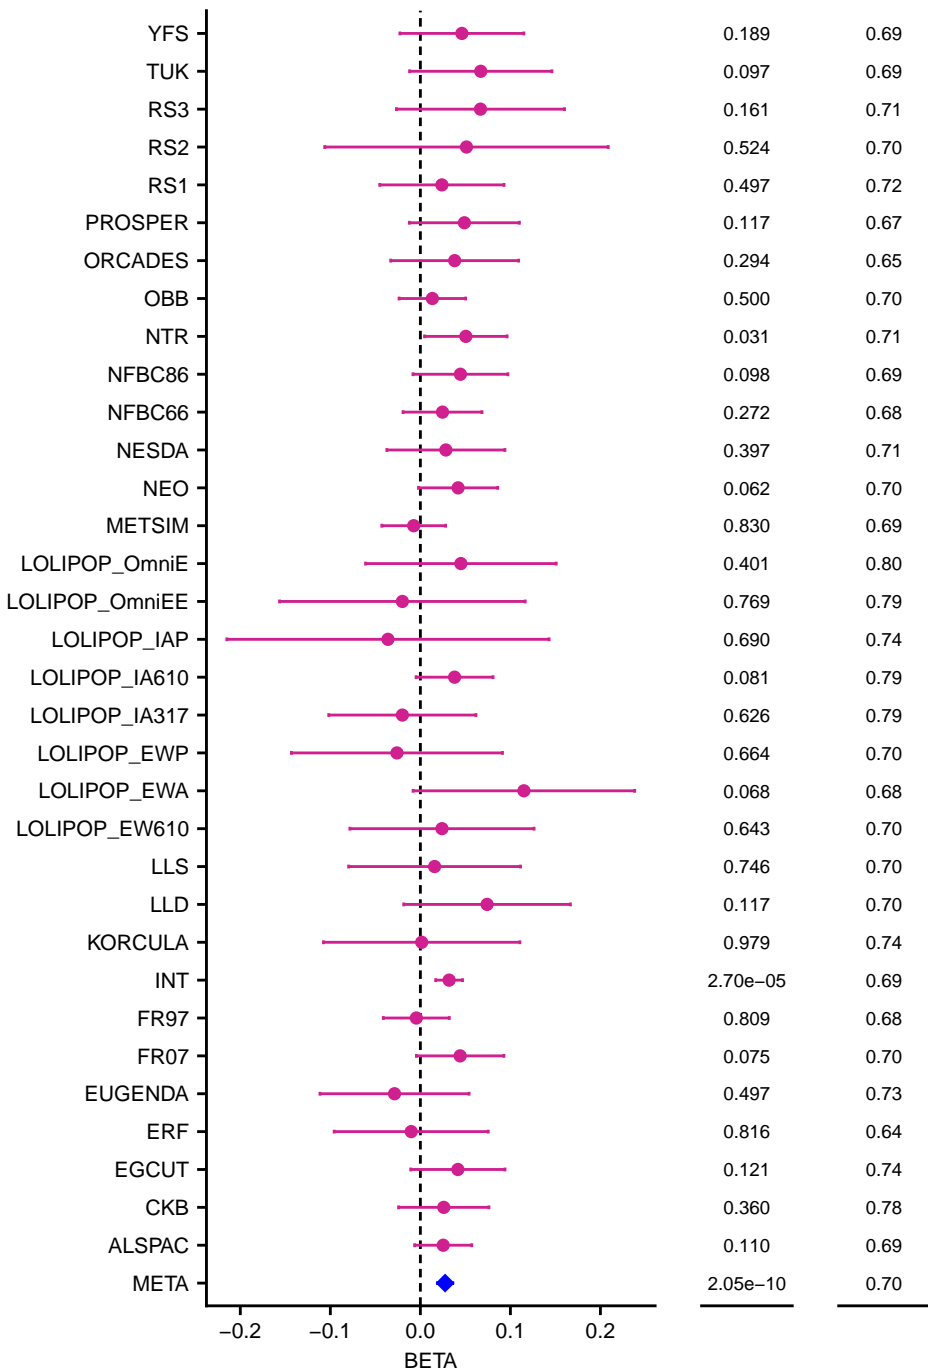

## chr1:220973563:T HDL-C

P-value

EAF

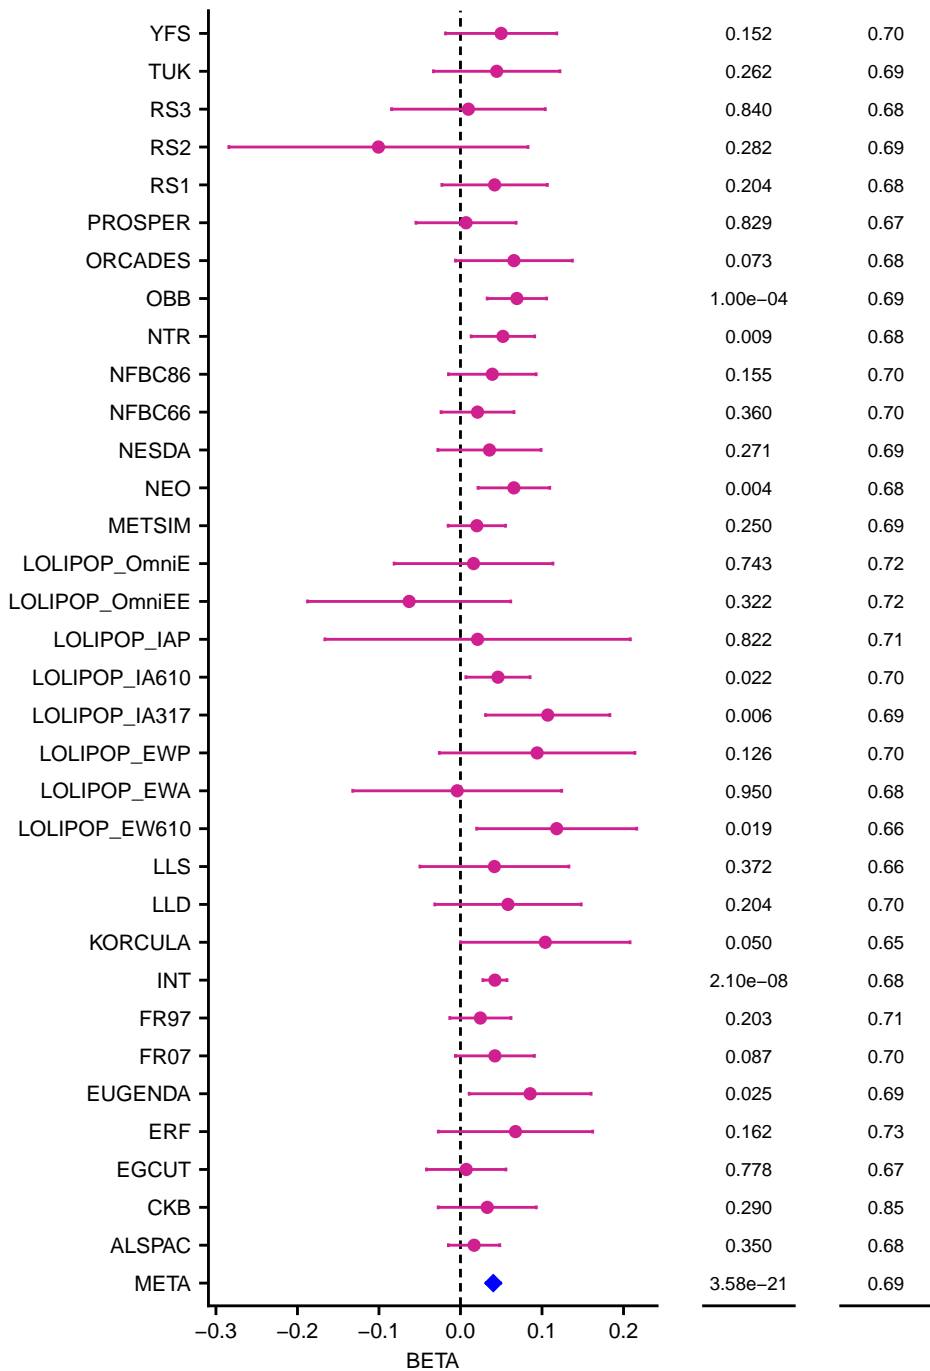

## chr1:230294916:T TGbyPG

P-value

EAF

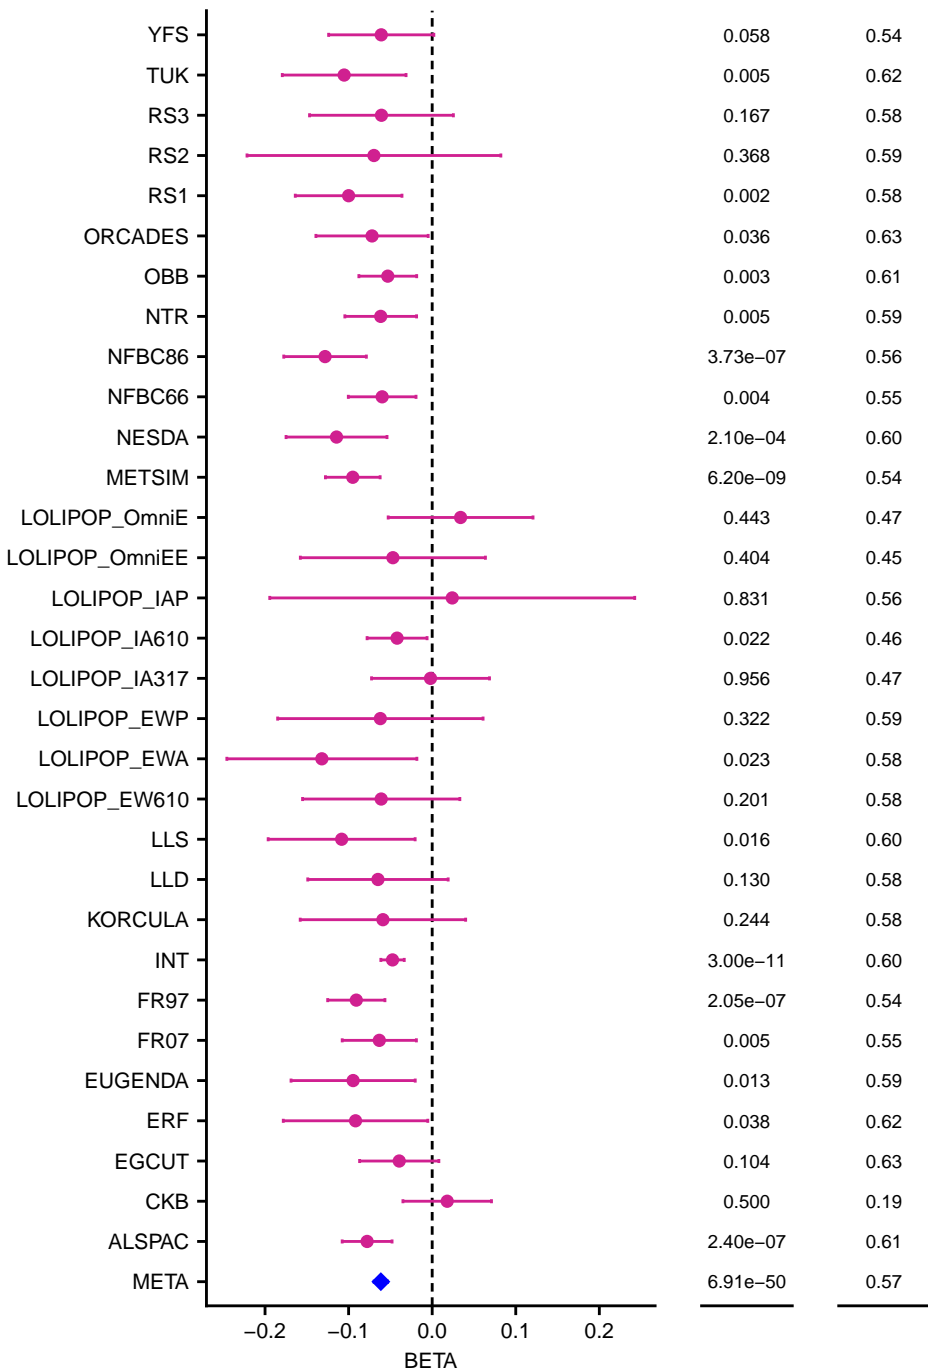

## chr1:234857676:T M-LDL-FC

P-value

EAF

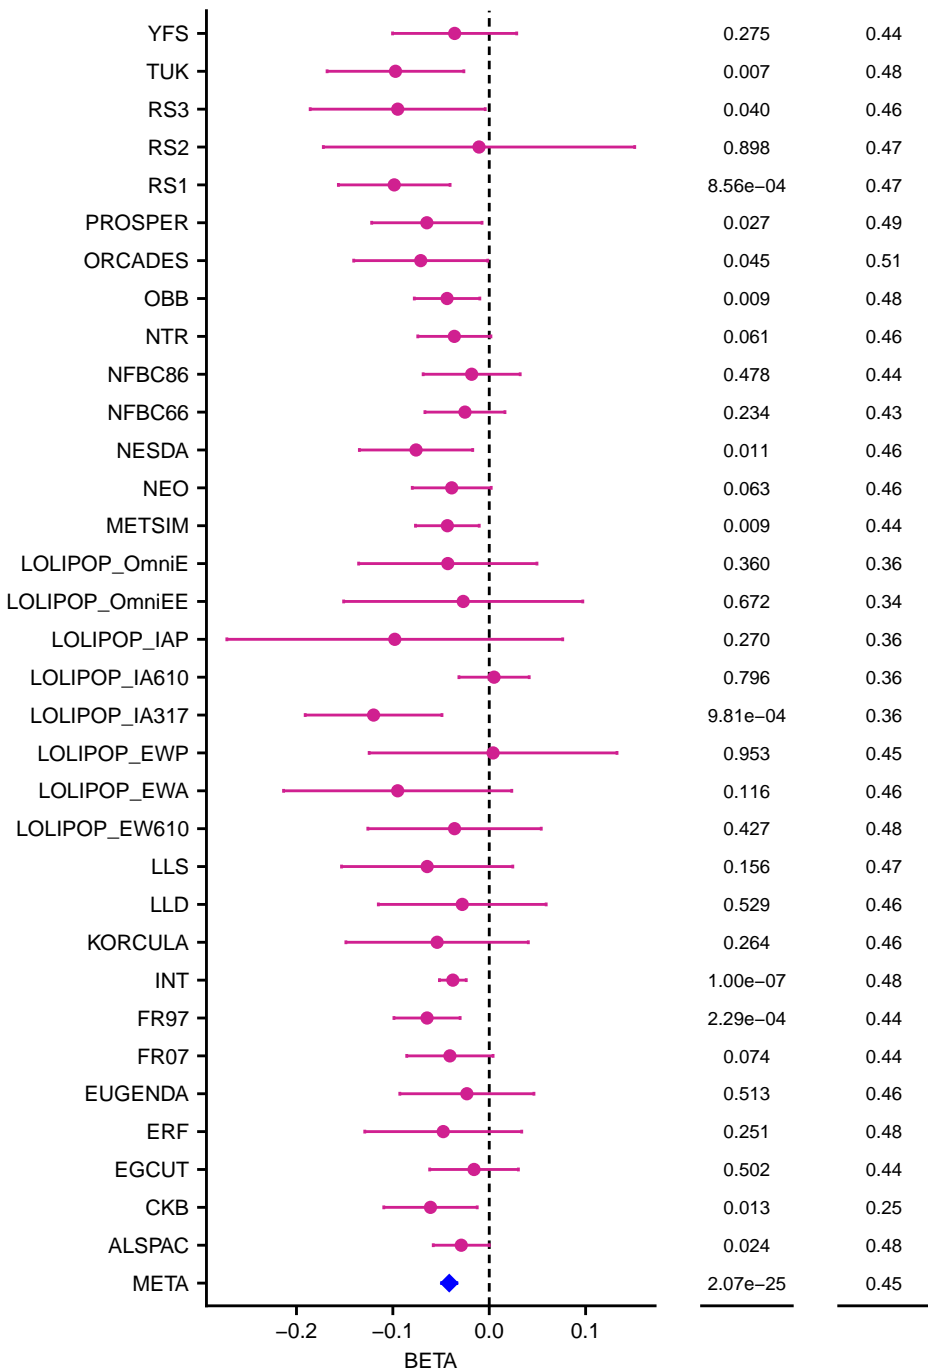

## chr2:21288226:A L-LDL-PL\_percent

P-value

EAF

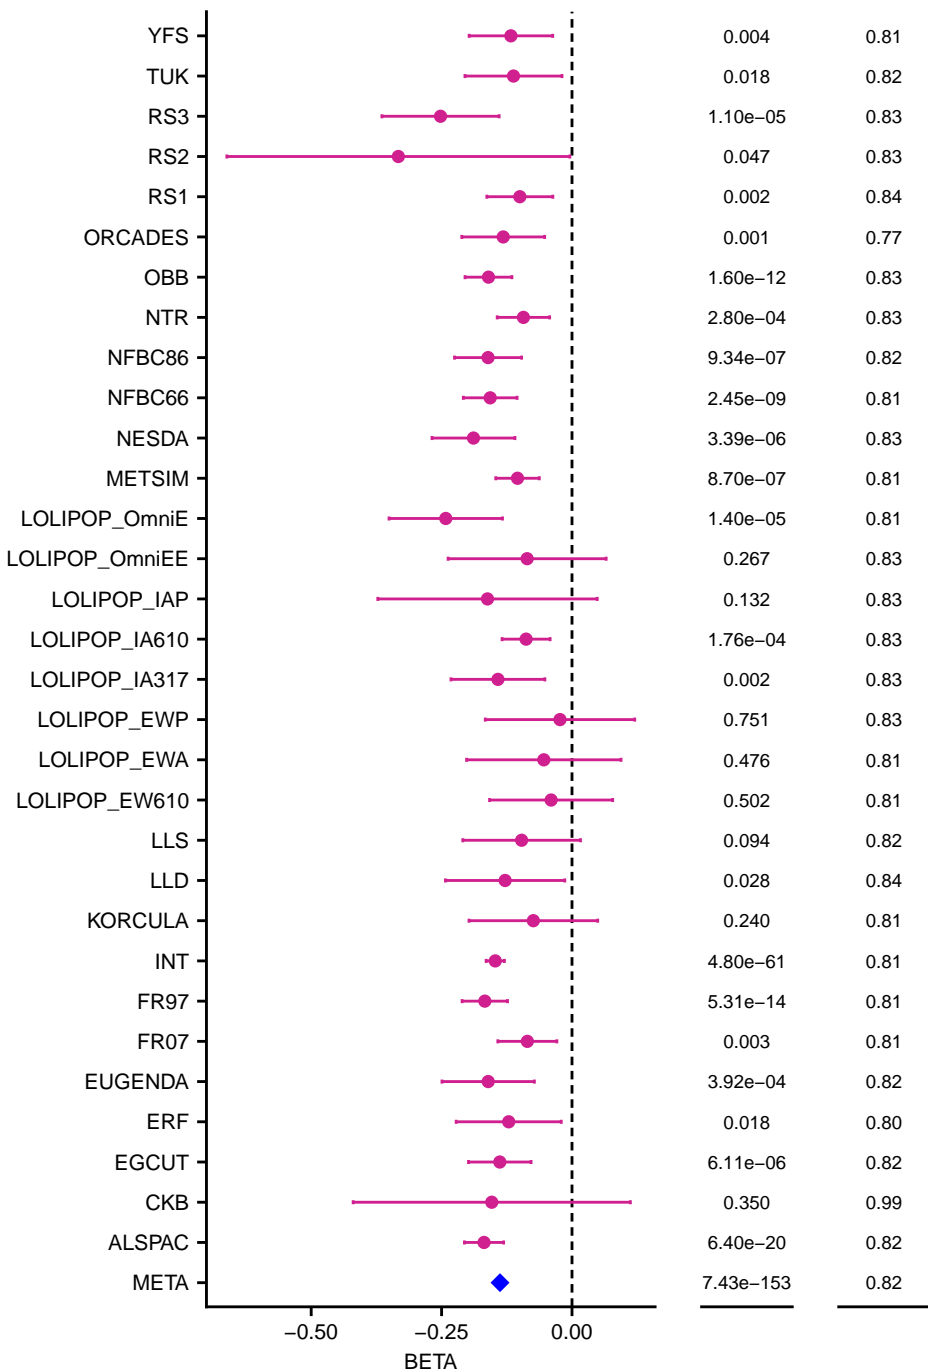

## chr2:27730940:T VLDL-TG

P-value

EAF

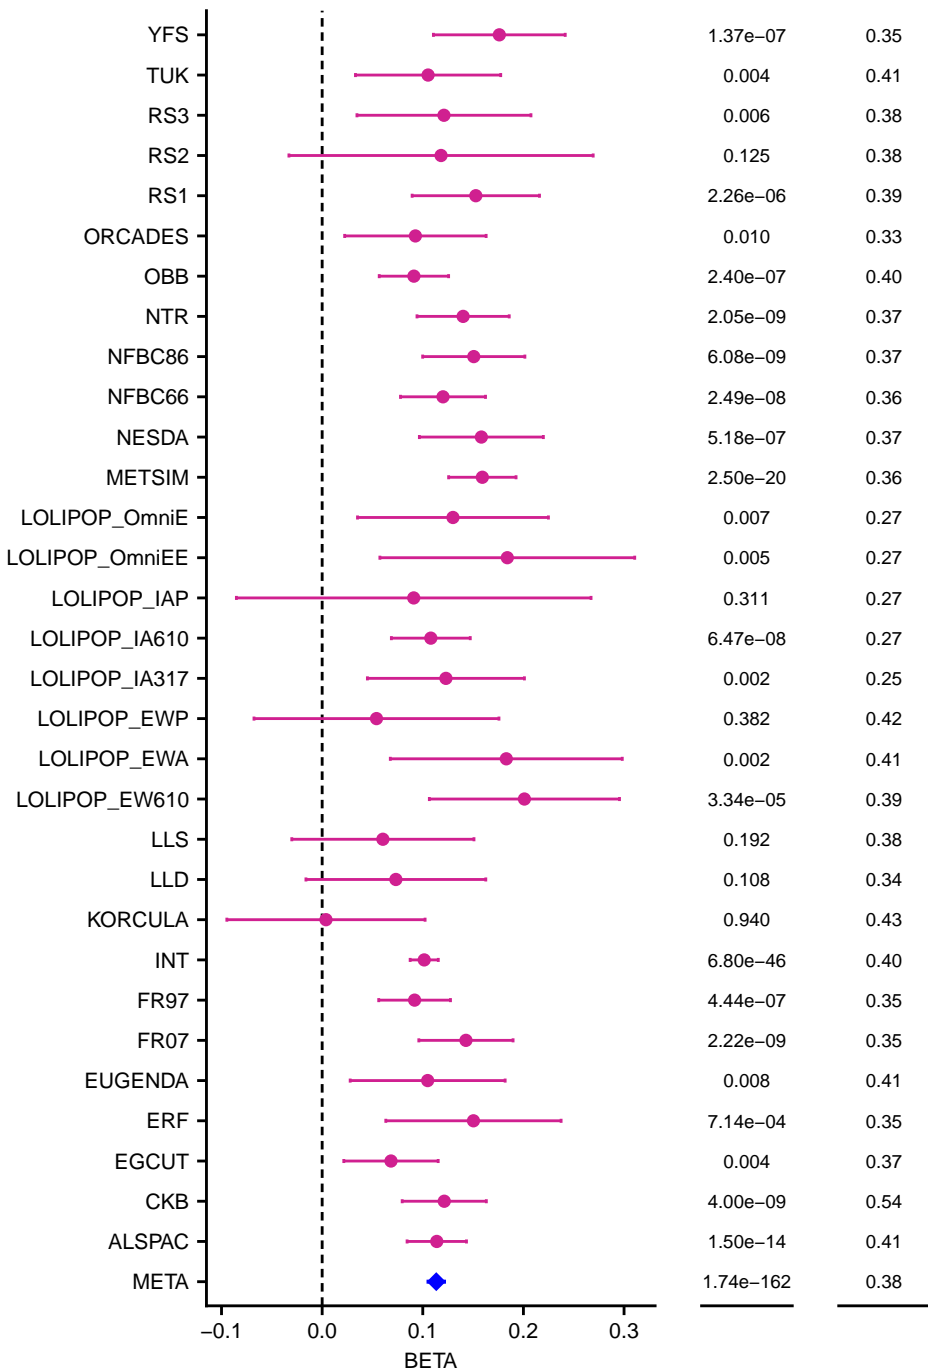

chr2:44072576:T IDL-CE

P-value

EAF

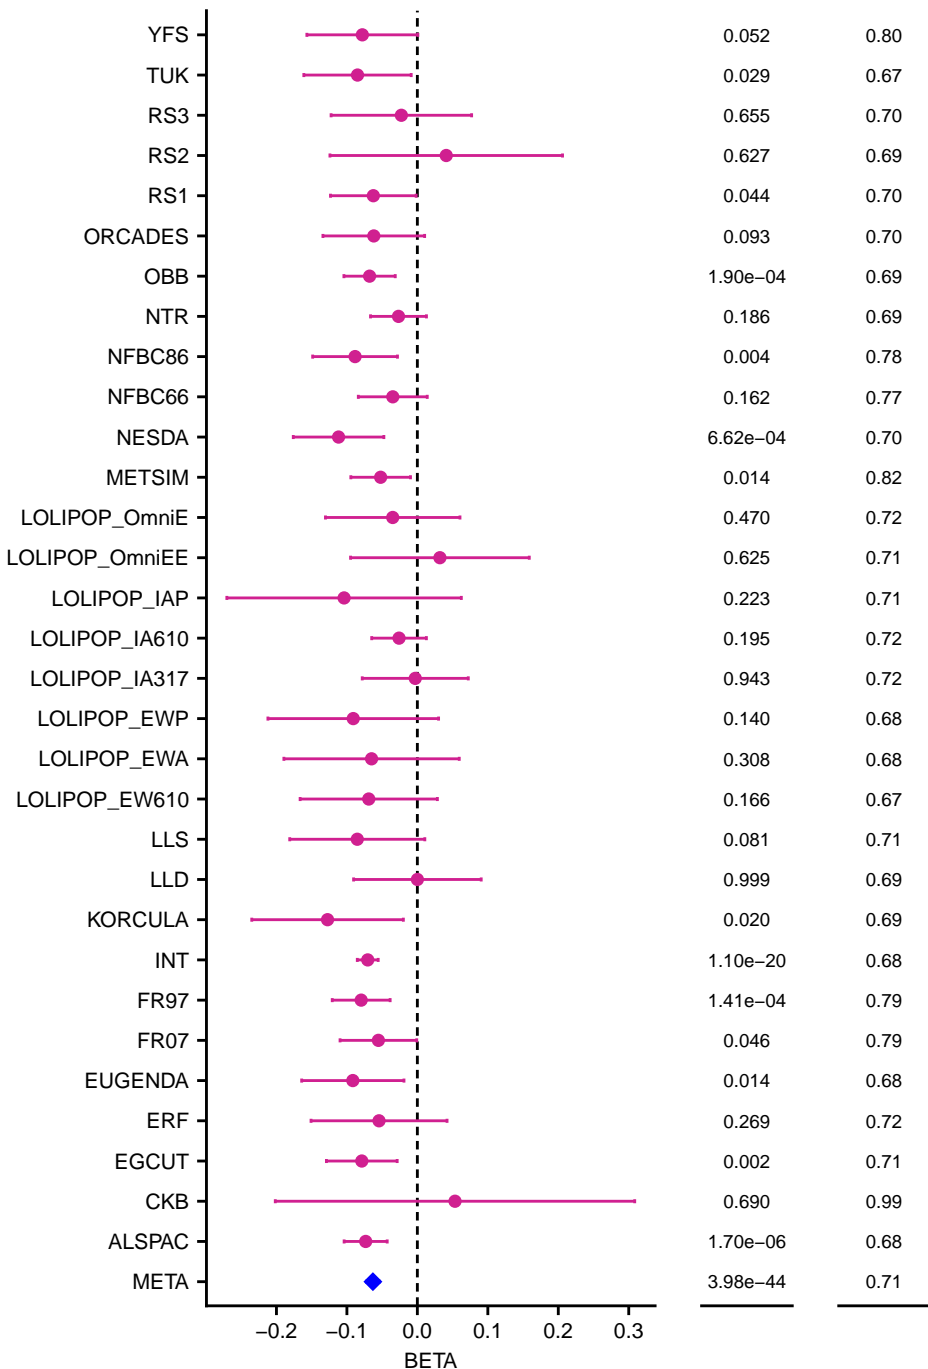

## chr2:62955387:A S-LDL-PL\_percent

P-value

EAF

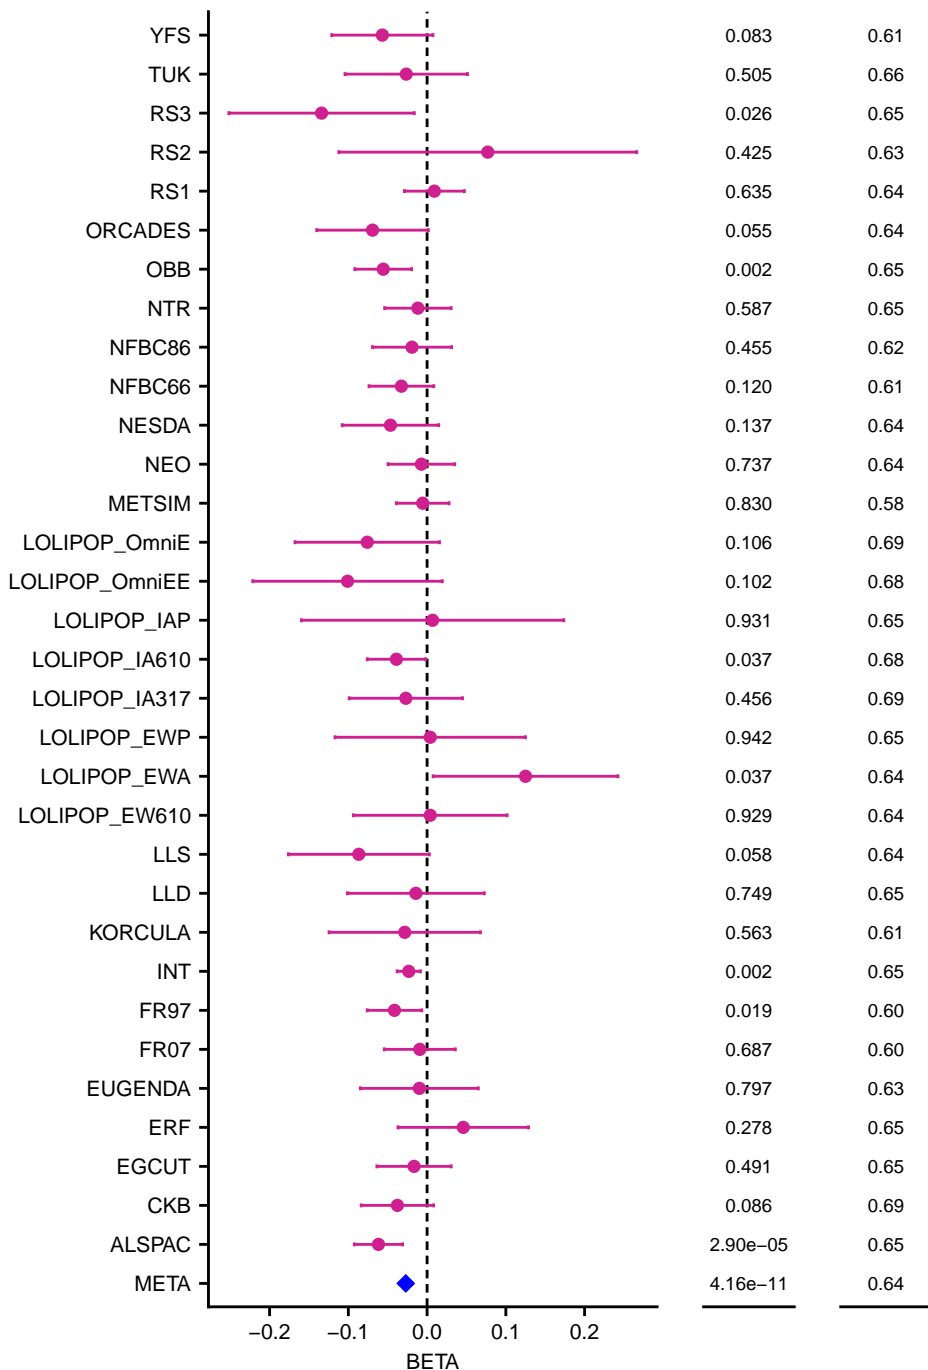



chr2:65231806:A Val

P-value

EAF

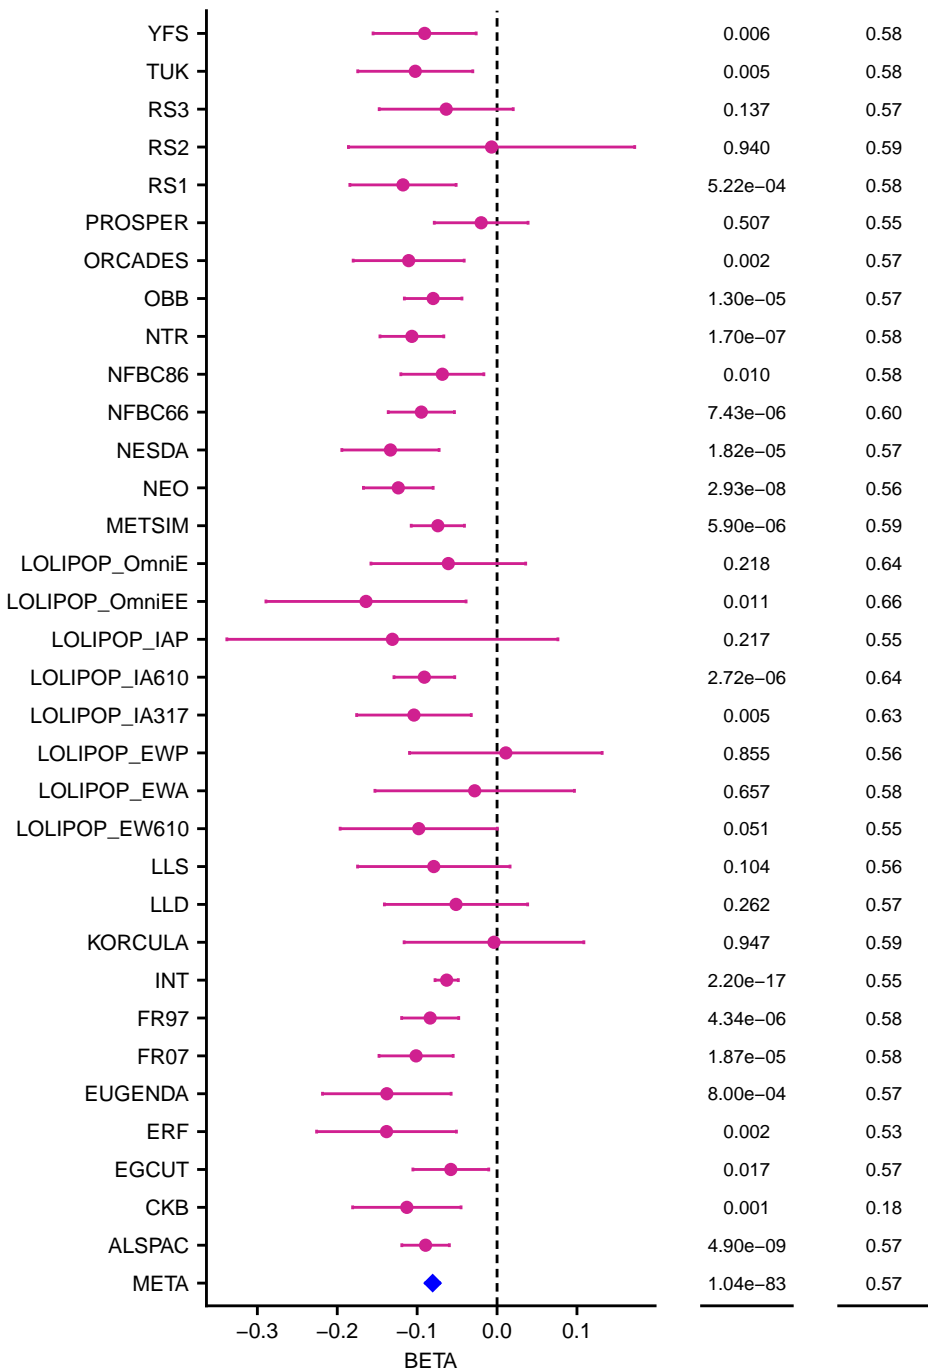

chr2:73883072:A Crea

P-value

EAF

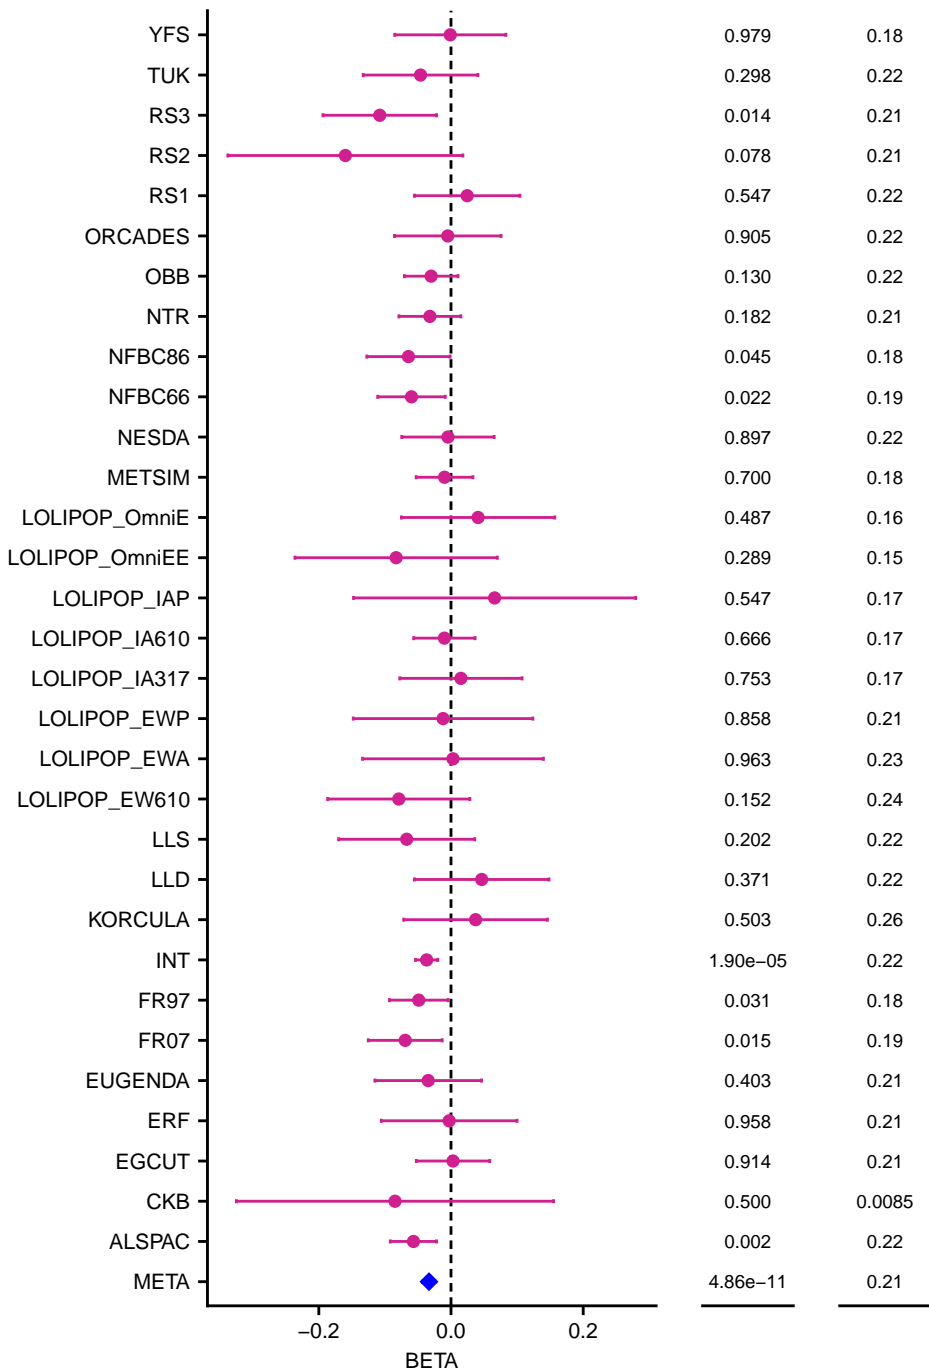

chr2:100859622:A XL-HDL-FC\_percent

P-value

EAF

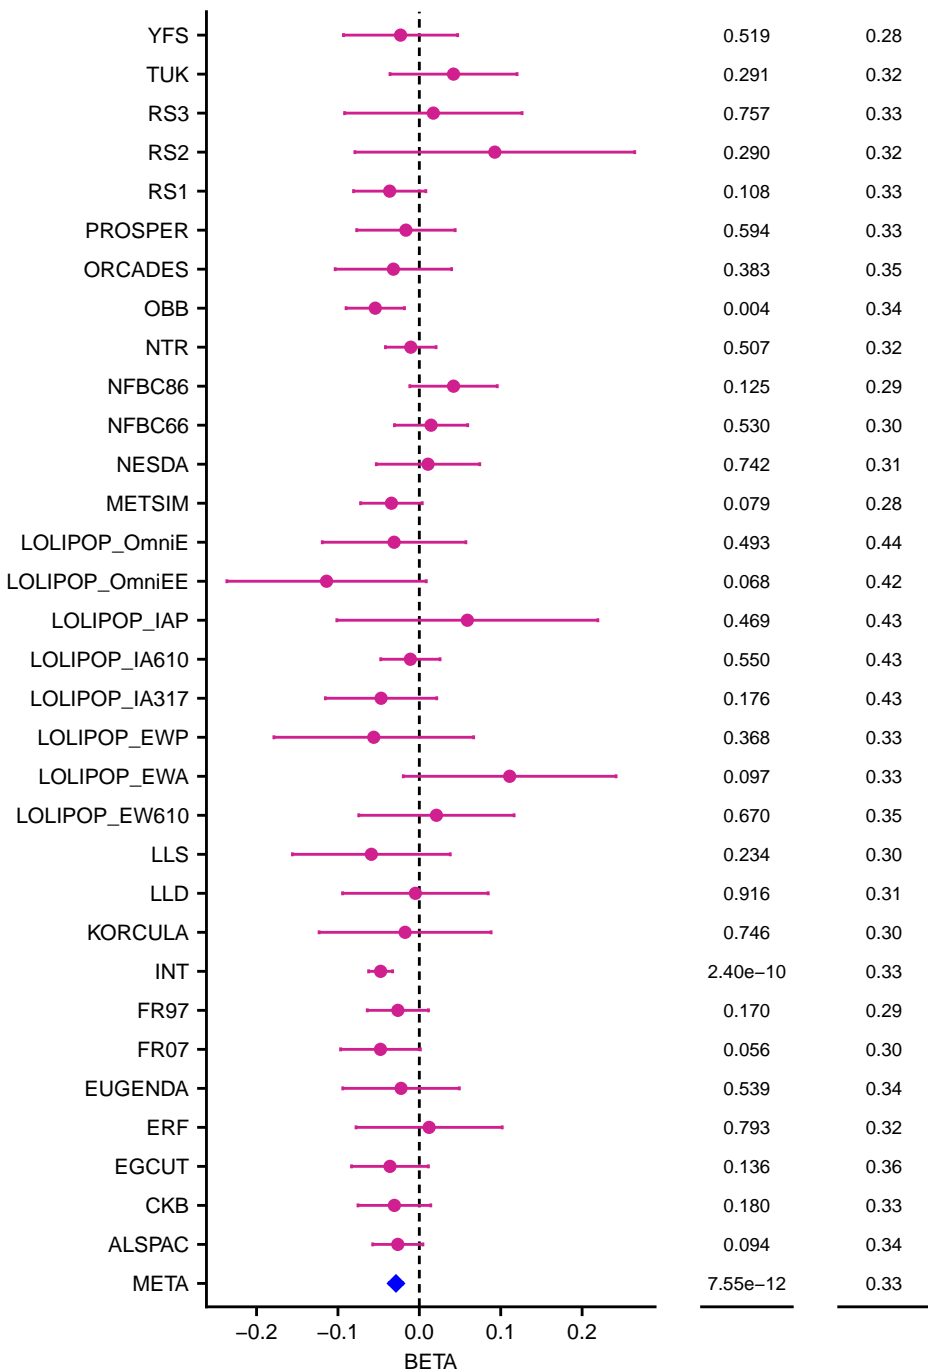

chr2:112220359:T XL-HDL-FC\_percent

P-value

EAF

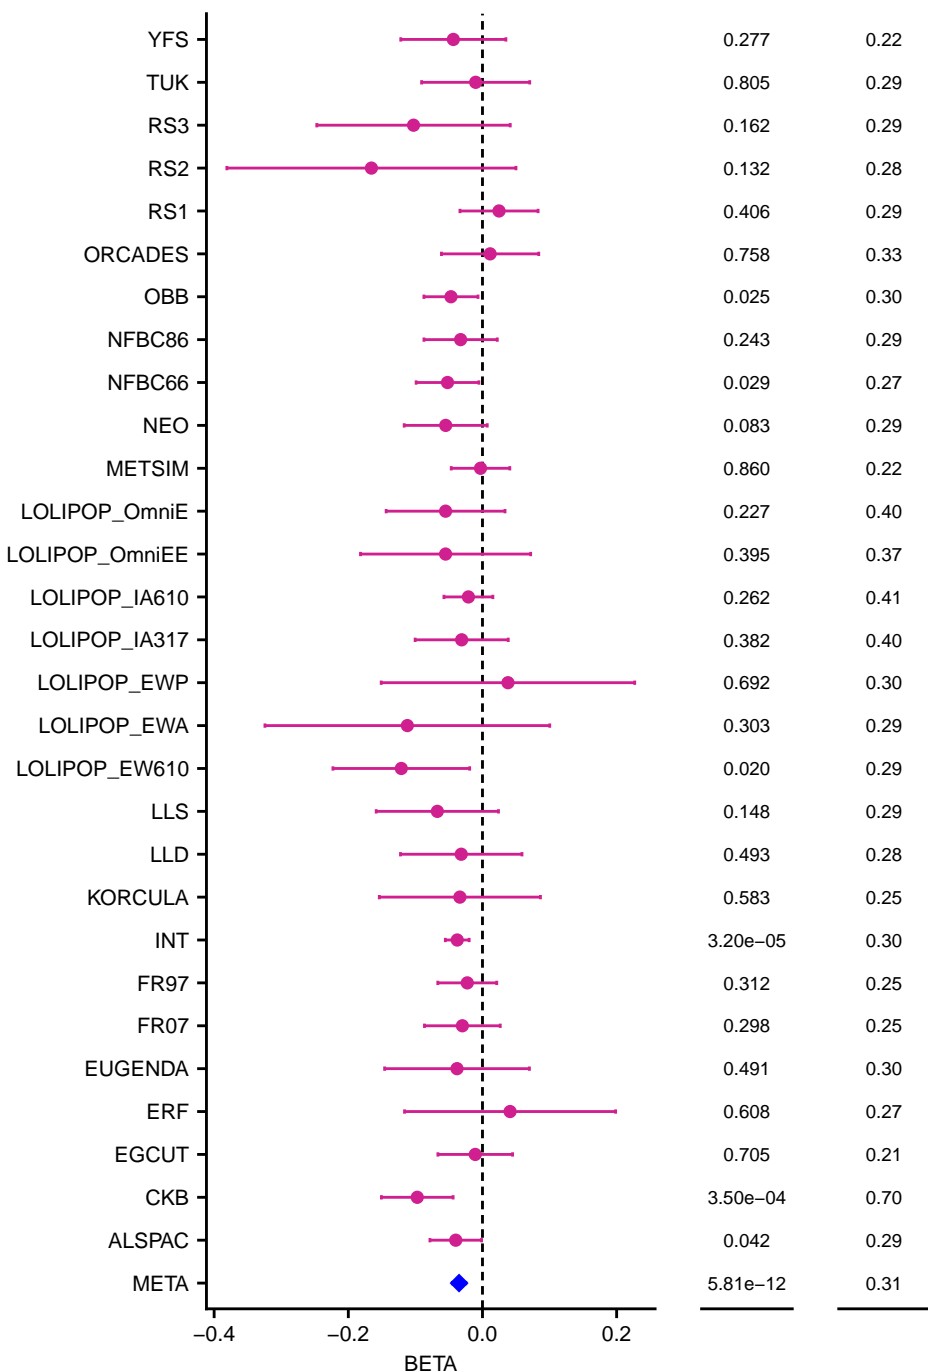

## chr2:113840575:C GlycA

P-value

EAF

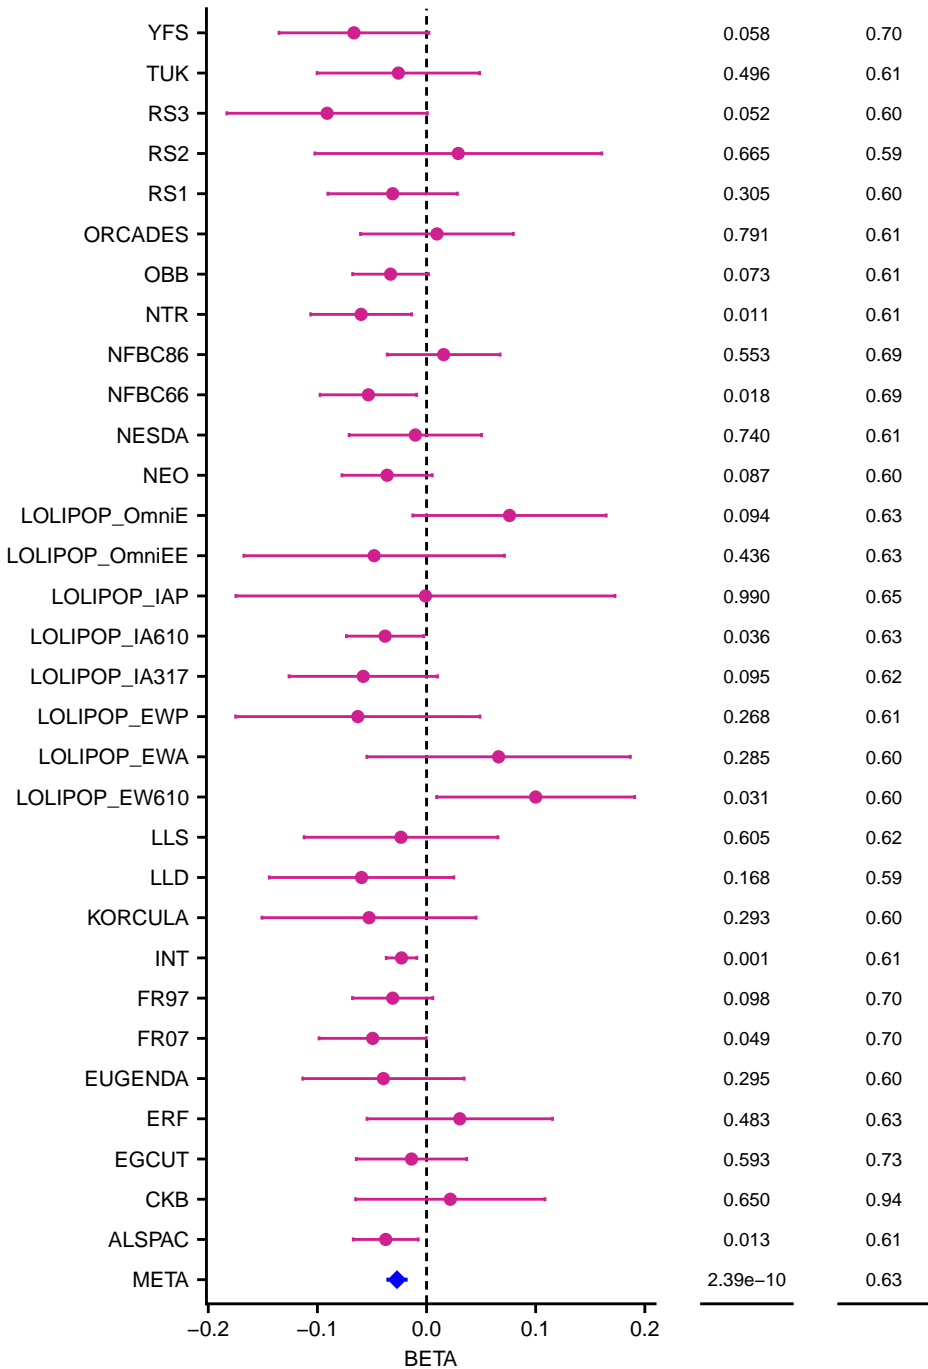

## chr2:118821597:C IDL-CE

P-value

EAF

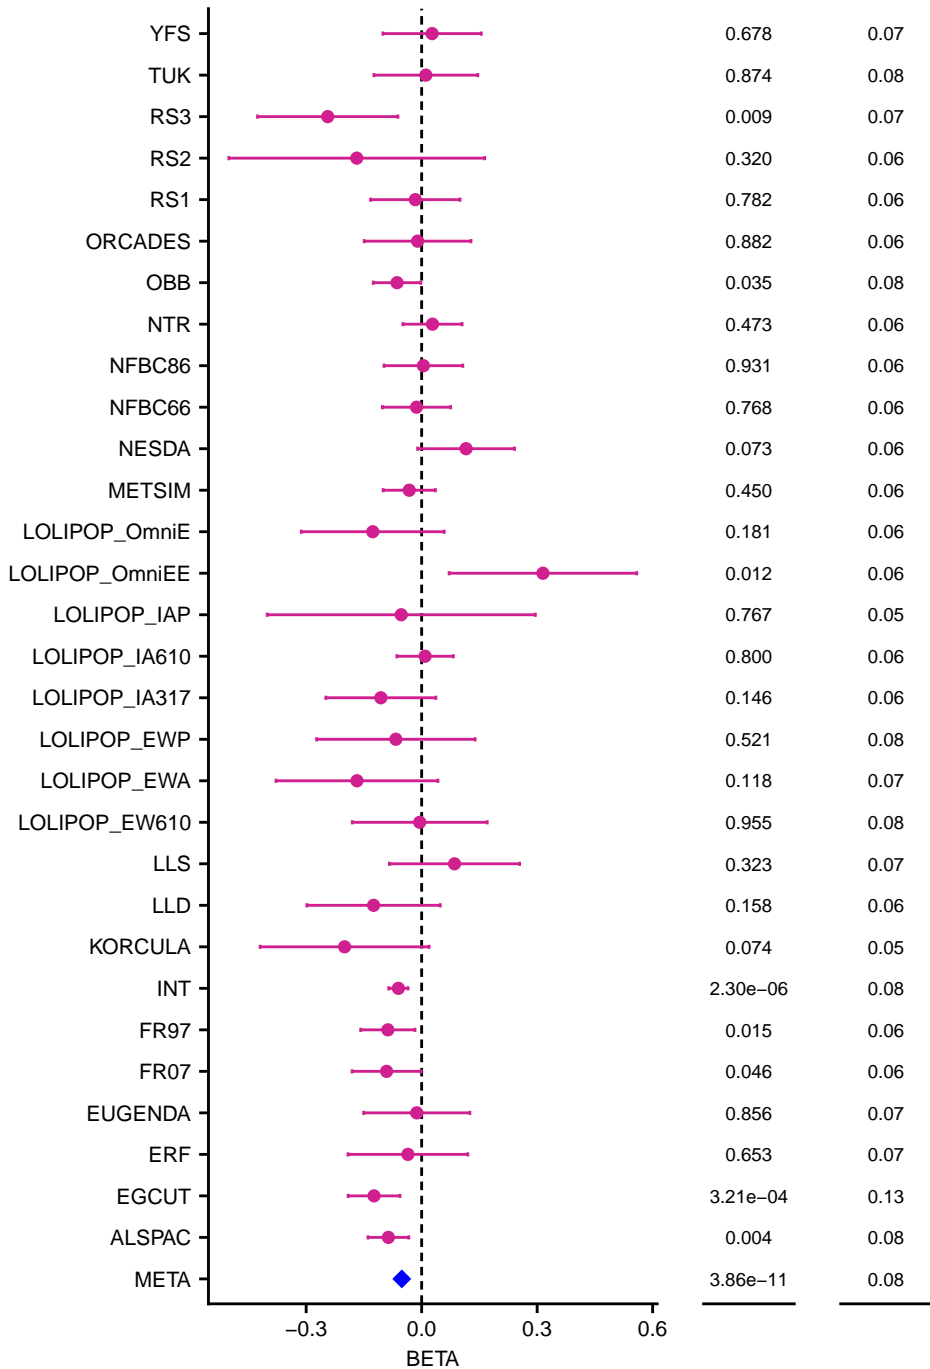

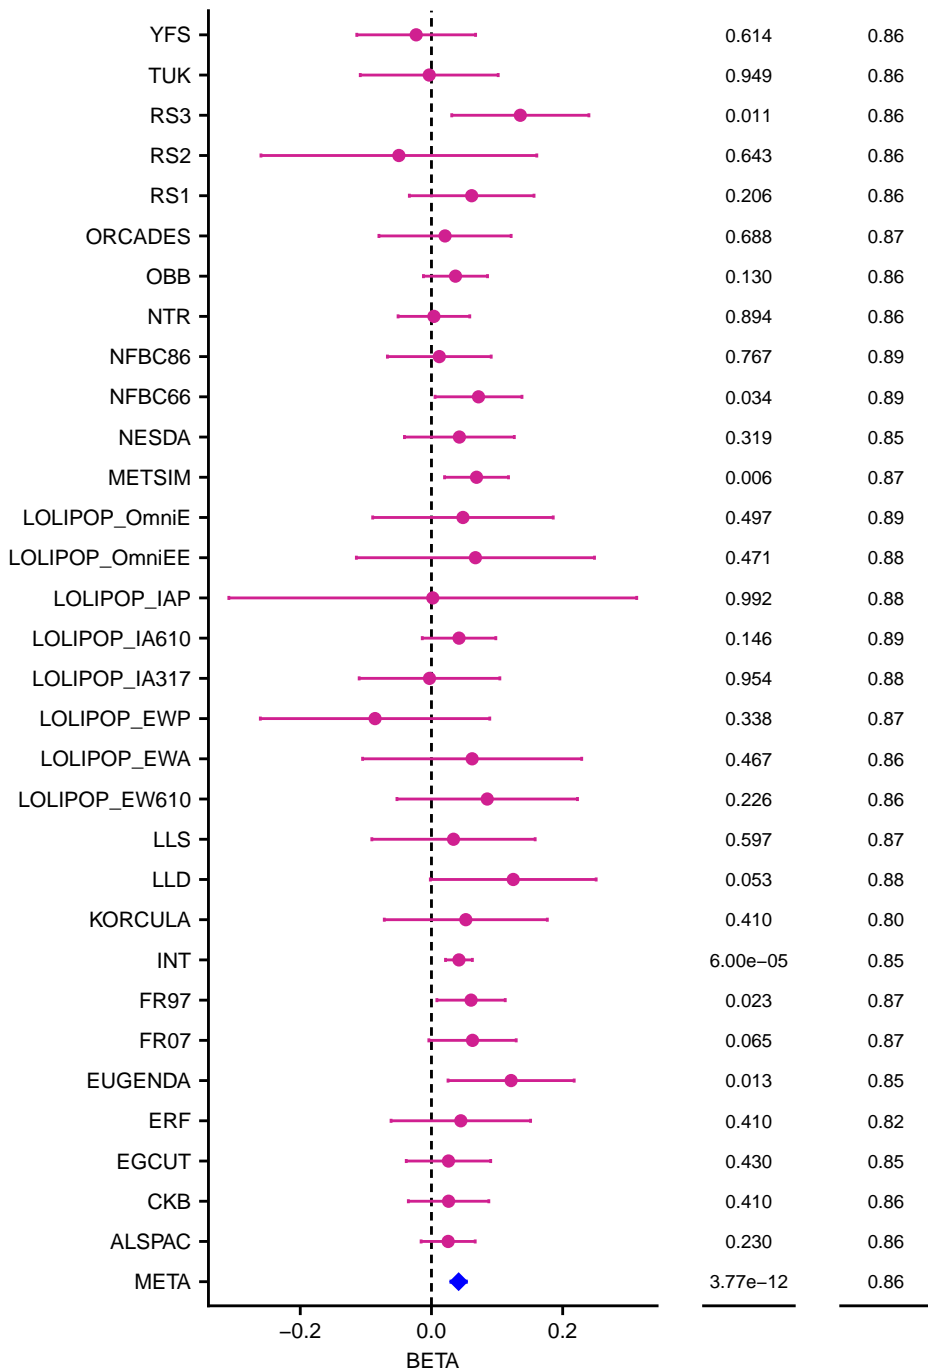

## chr2:136707982:T XL-HDL-FC

P-value

EAF

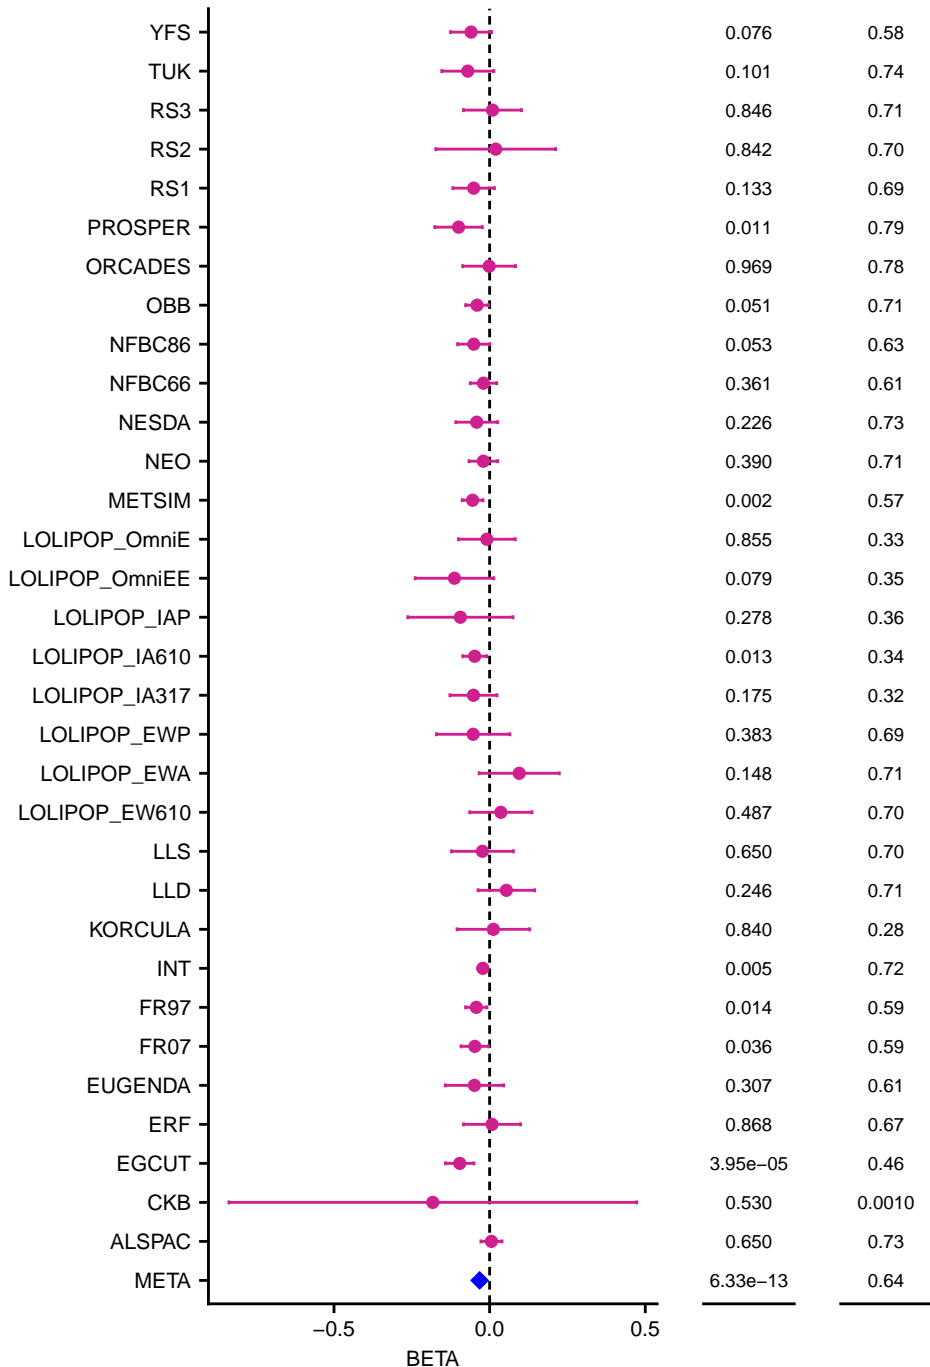



chr2:165513091:T XL-HDL-PL

P-value

EAF

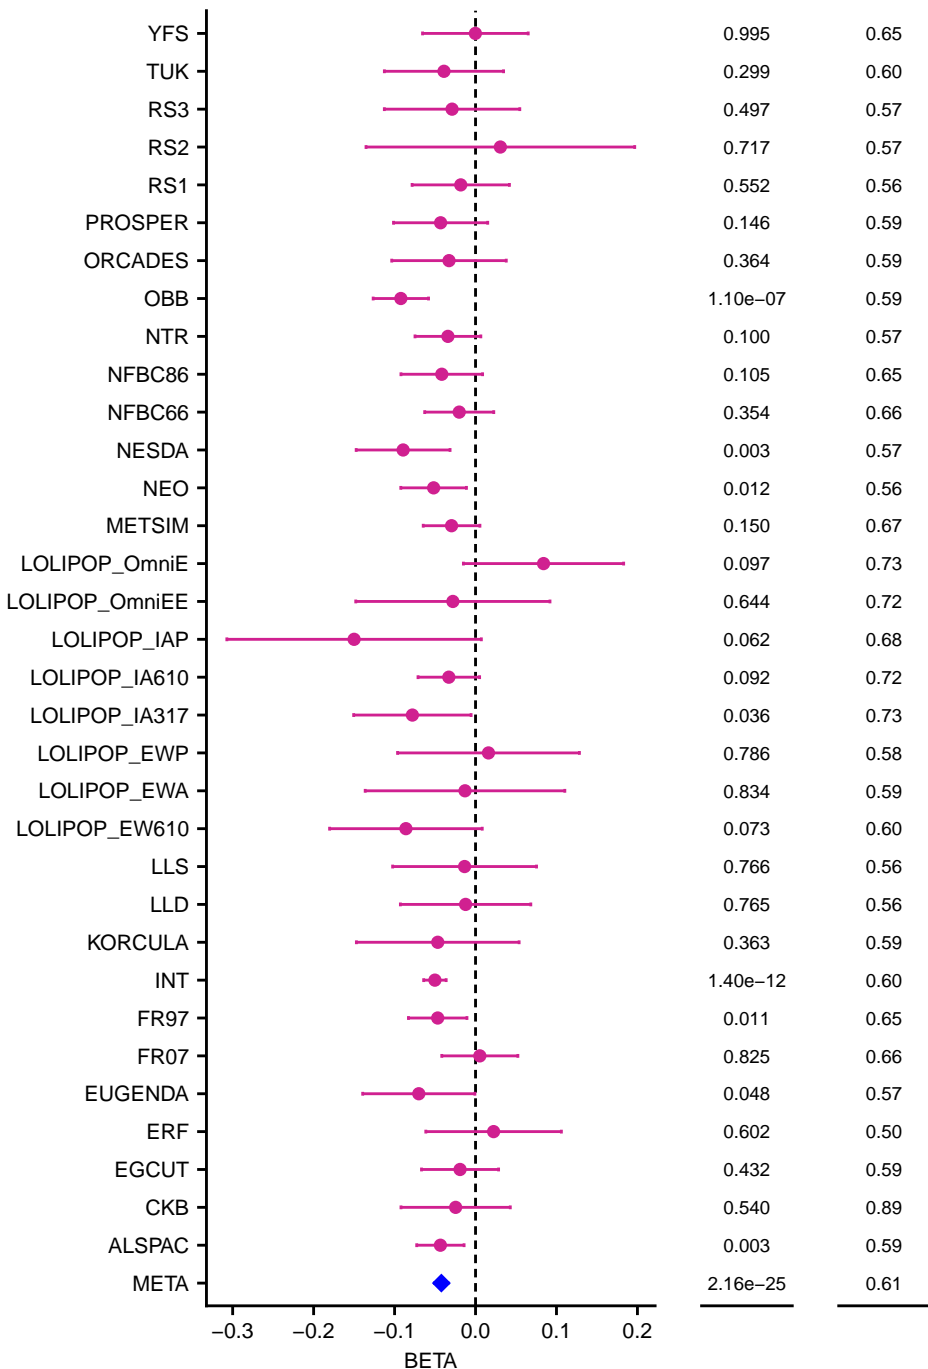

chr2:169763148:T Glc

P-value

EAF

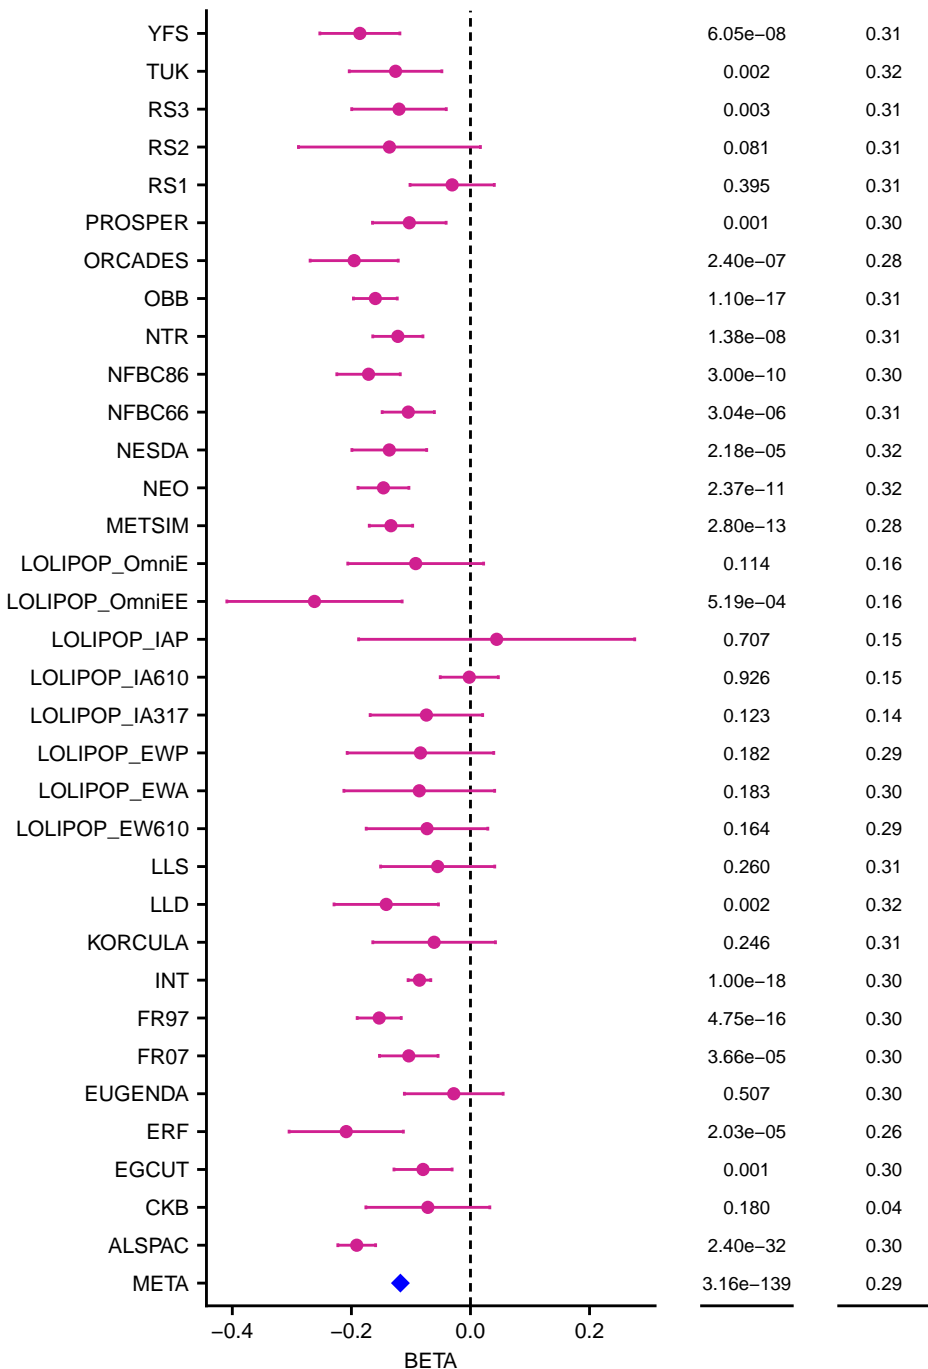

## chr2:176892553:A Crea

P-value

EAF

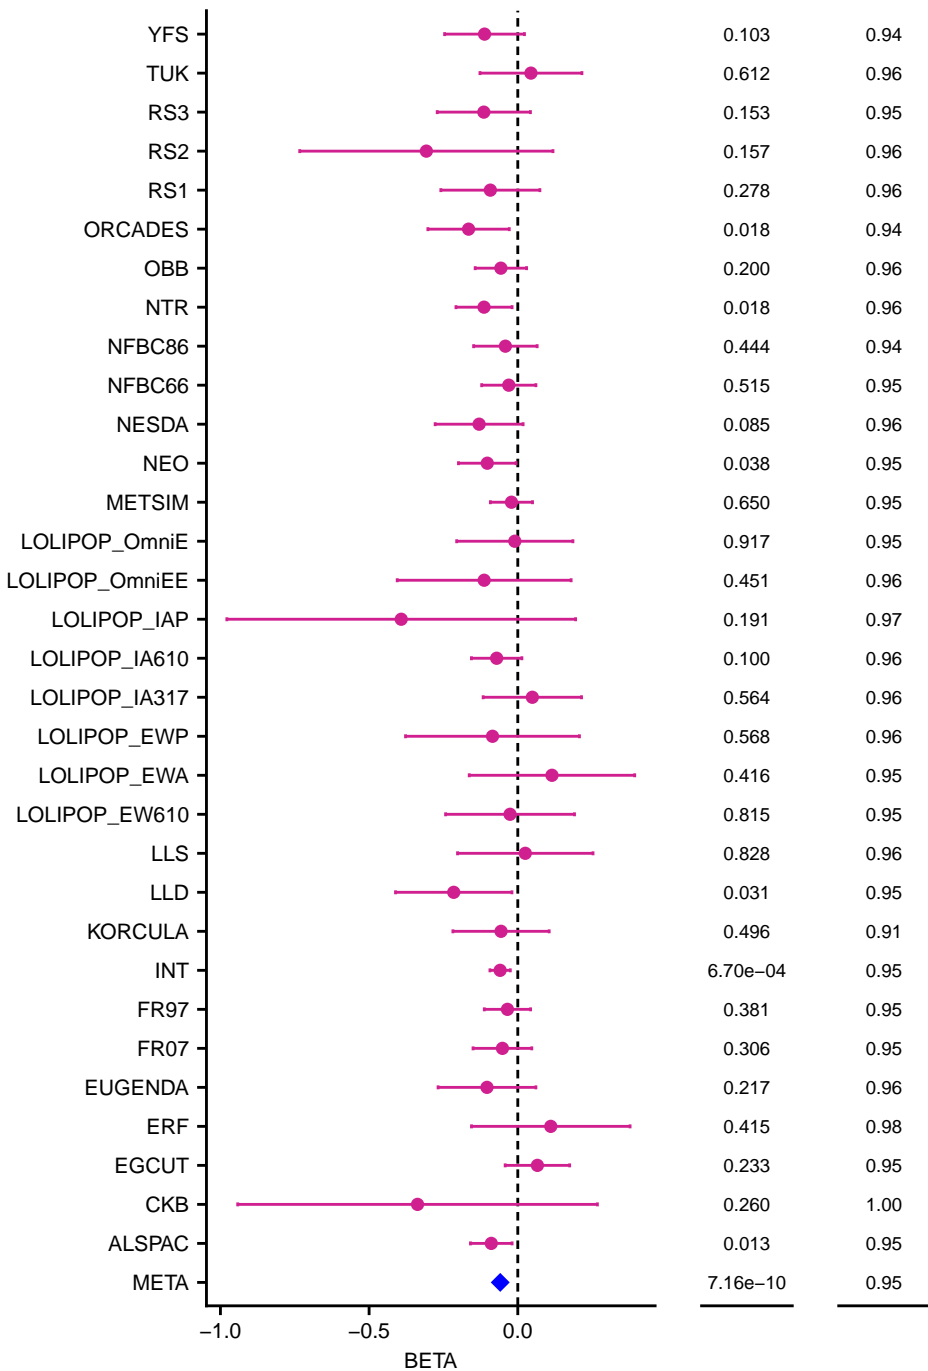

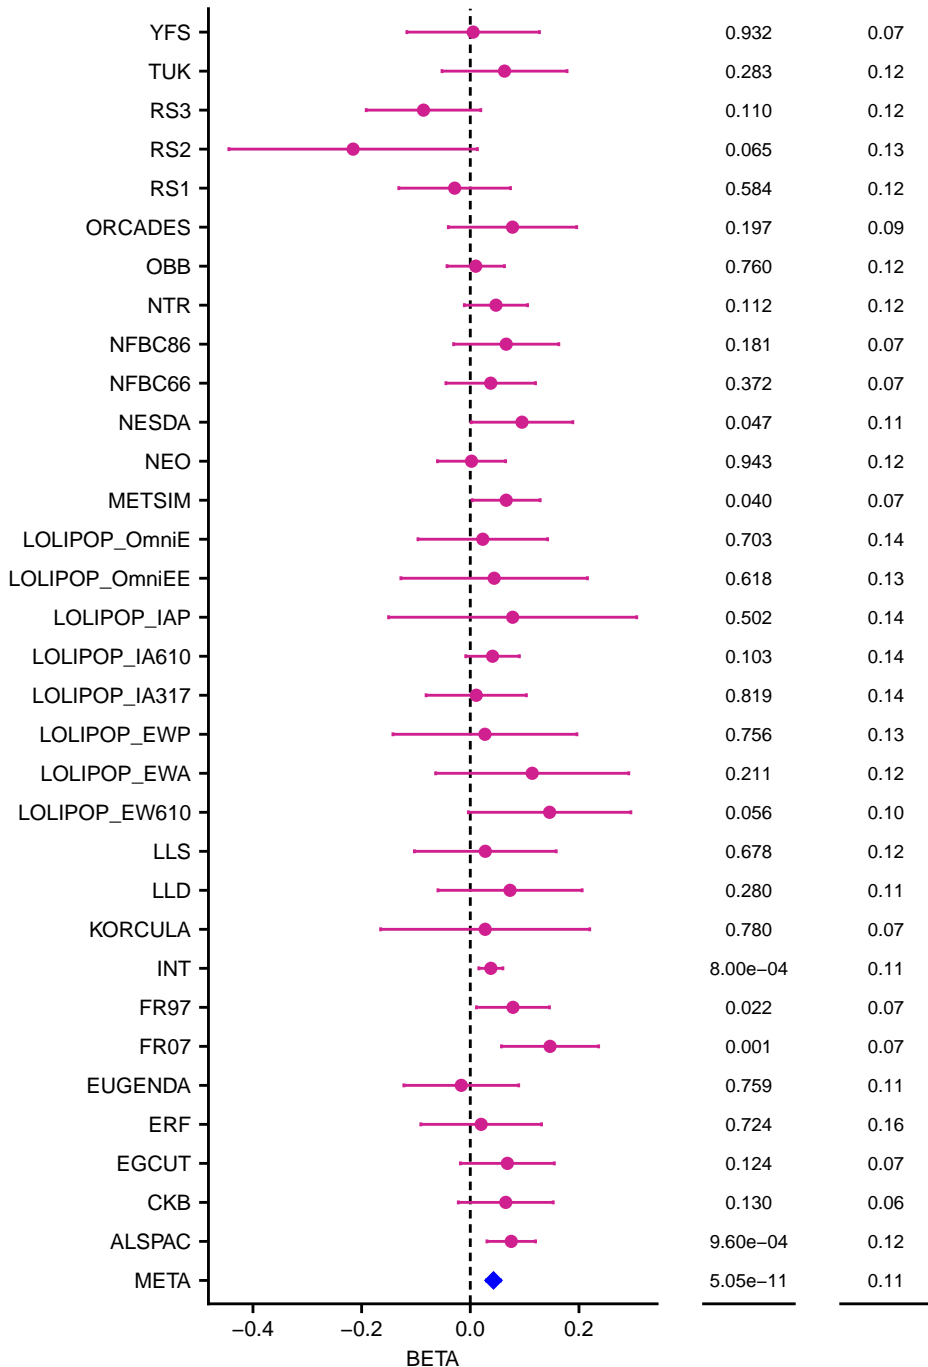

chr2:191740996:T Gln

P-value

EAF

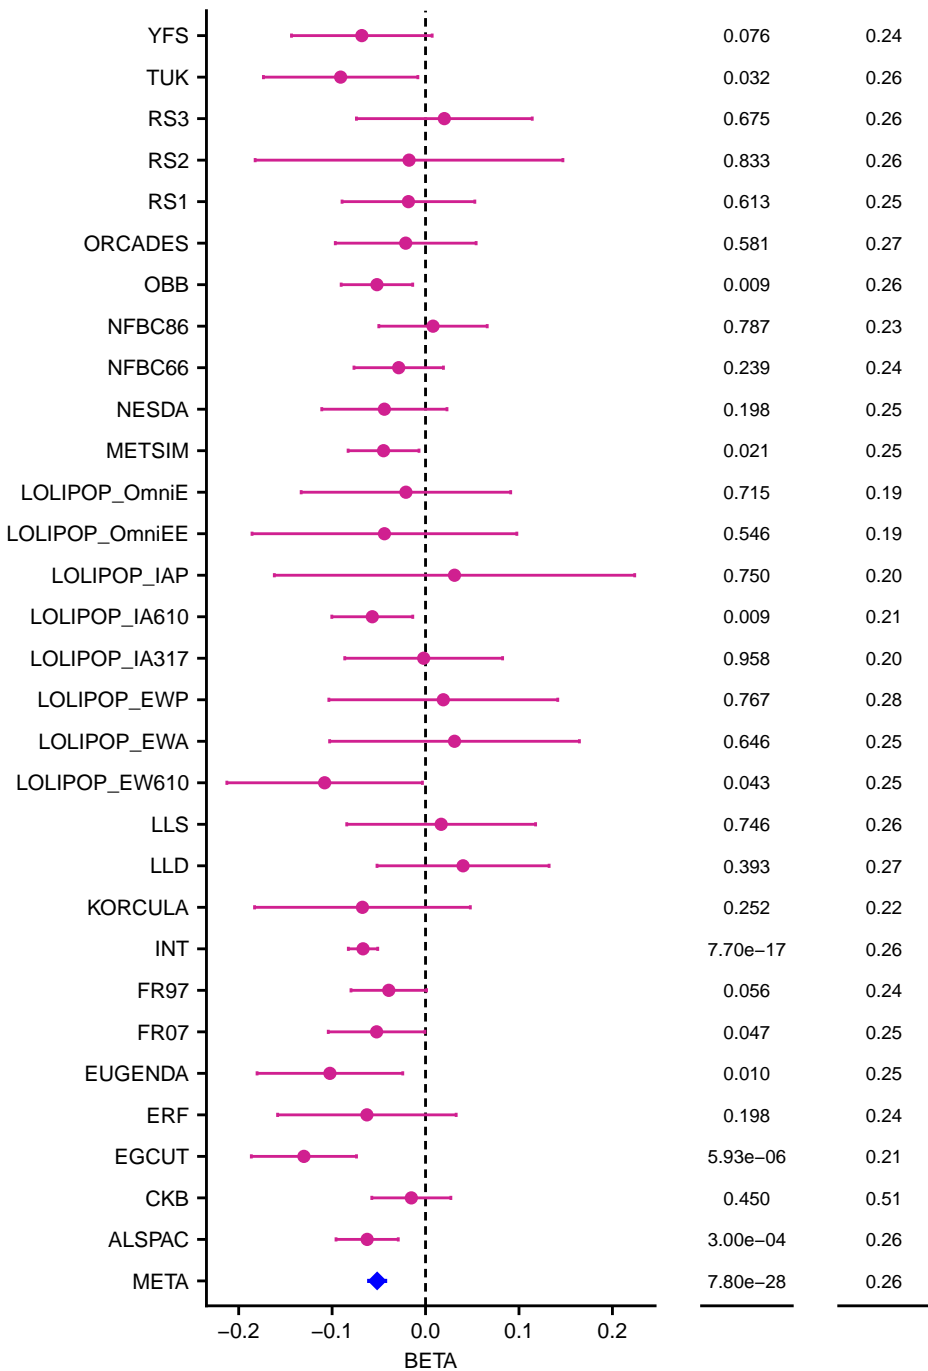

chr2:198883098:A Gln

P-value

EAF

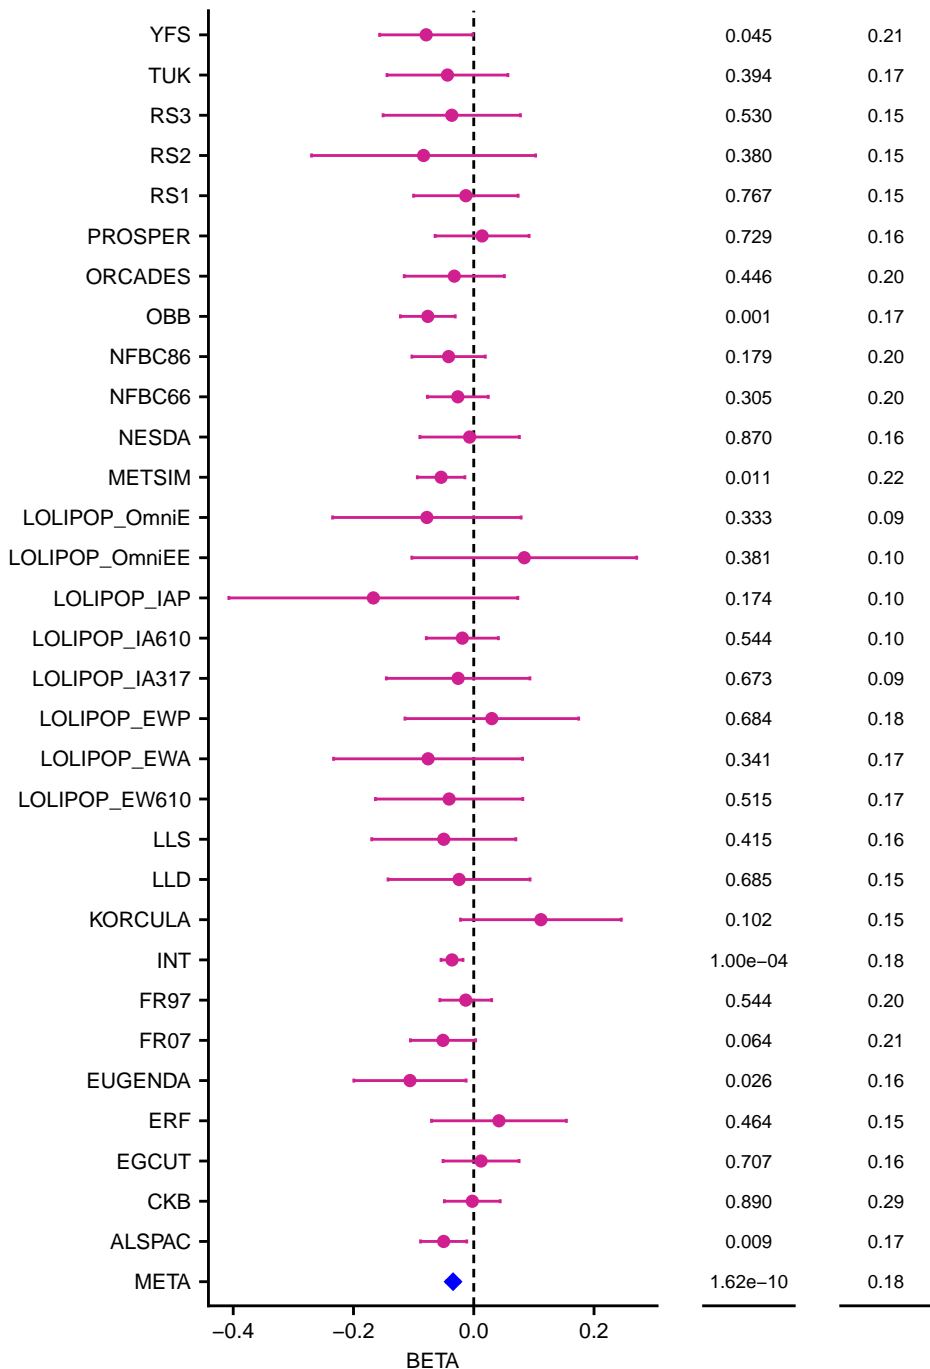

## chr2:203496575:A PUFA

P-value

EAF

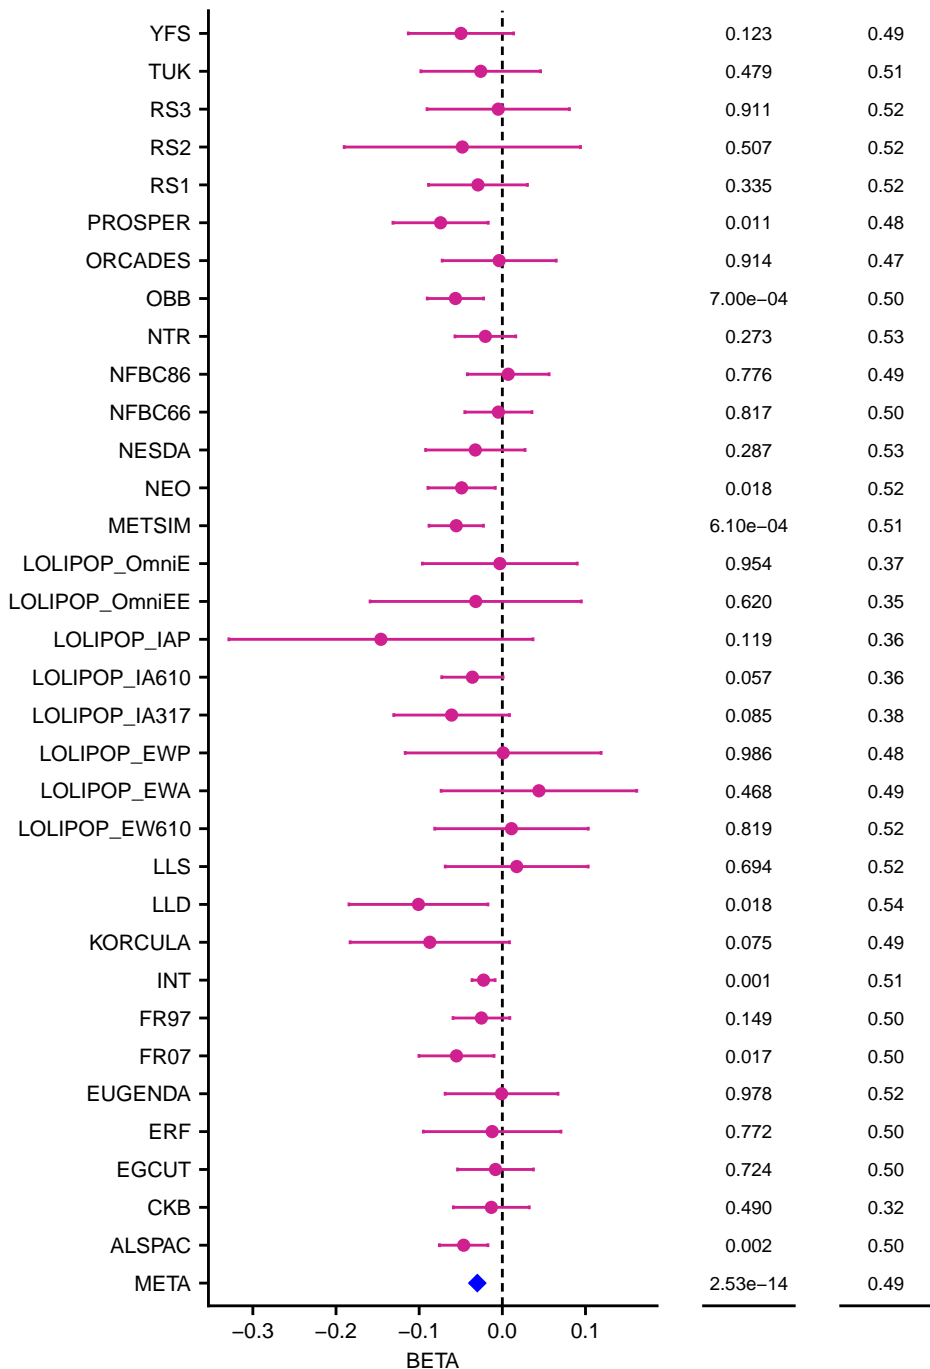

chr2:211540507:A Gly

P-value

EAF

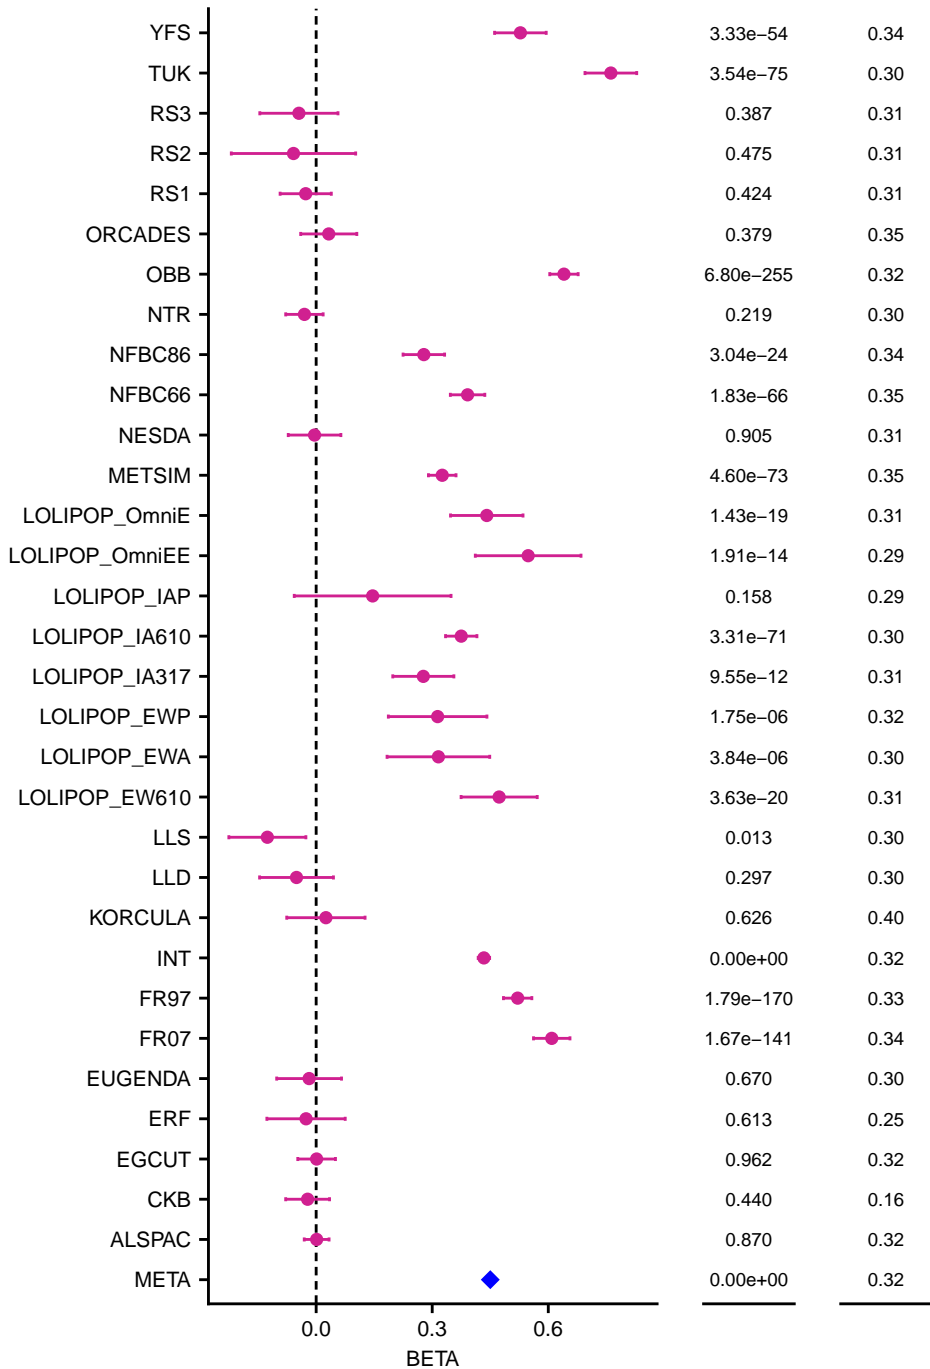



chr2:217672824:A Crea

P-value

EAF

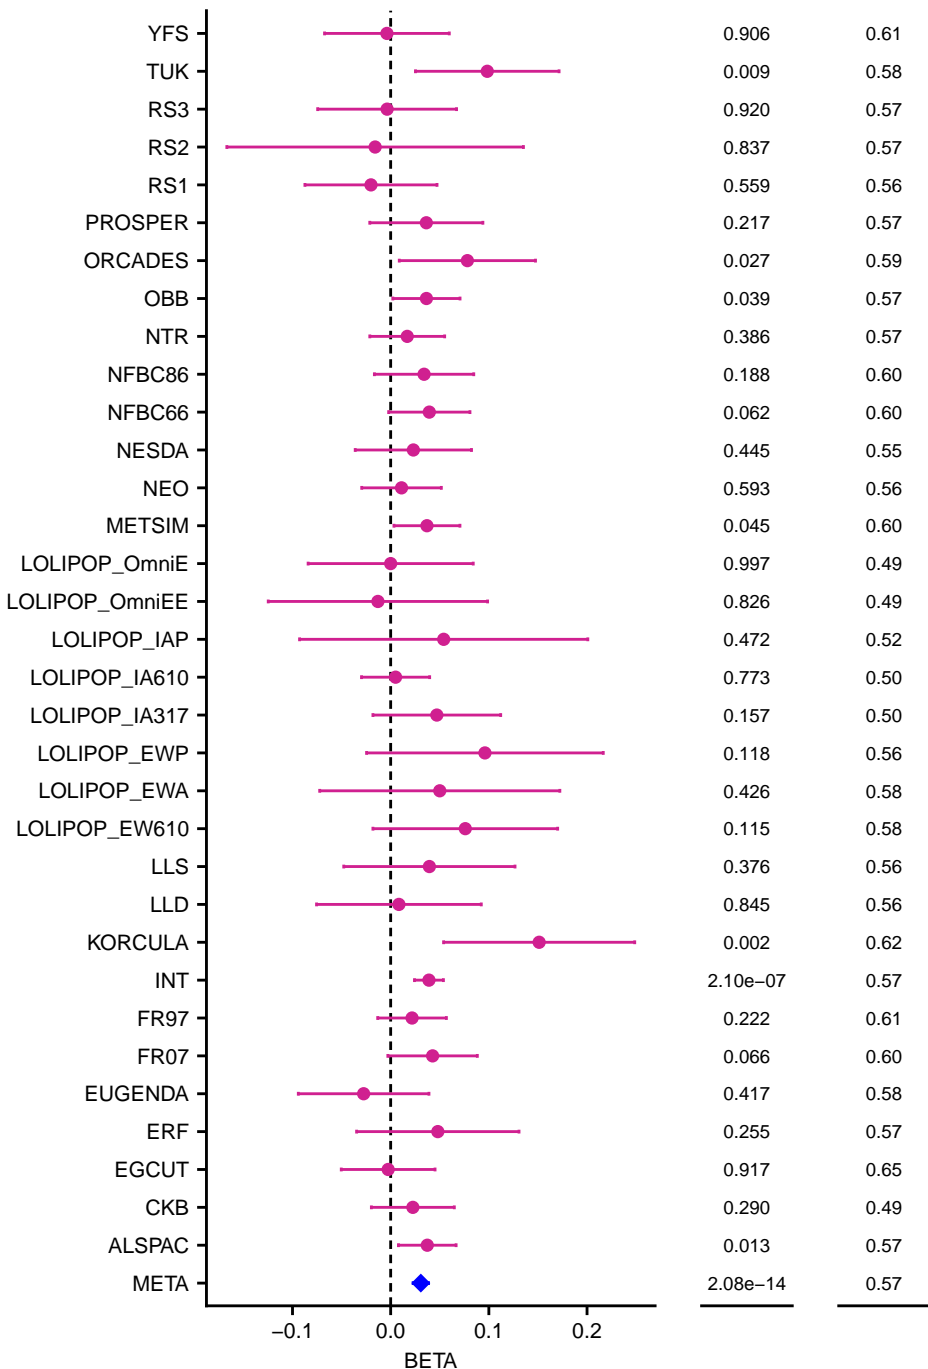

## chr2:219699999:A M-VLDL-TG

P-value

EAF

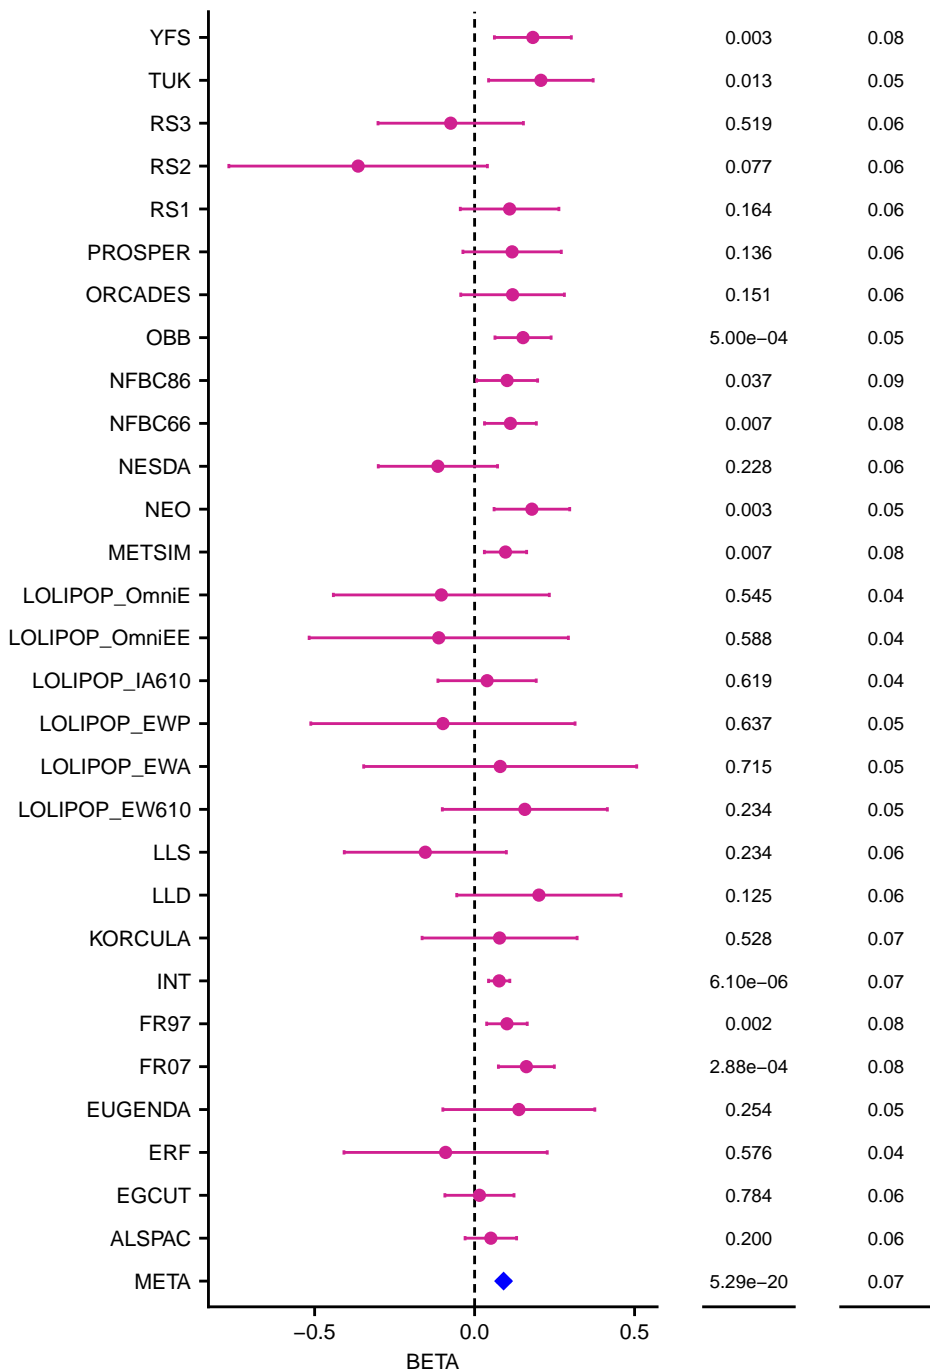

## chr2:227099854:T XL-HDL-PL

P-value

EAF

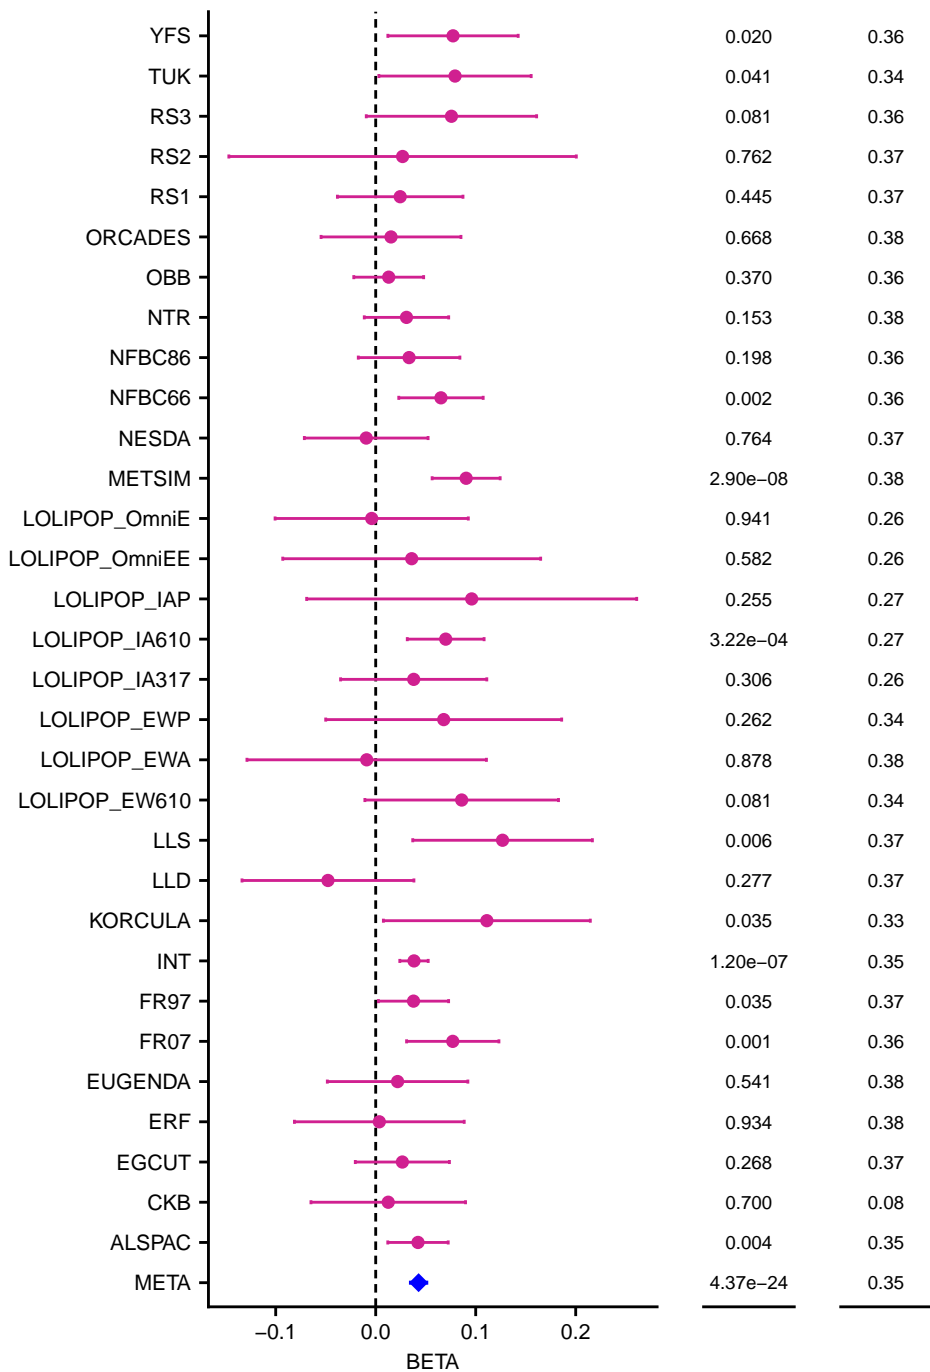

## chr3:12415839:T EstC

P-value

EAF

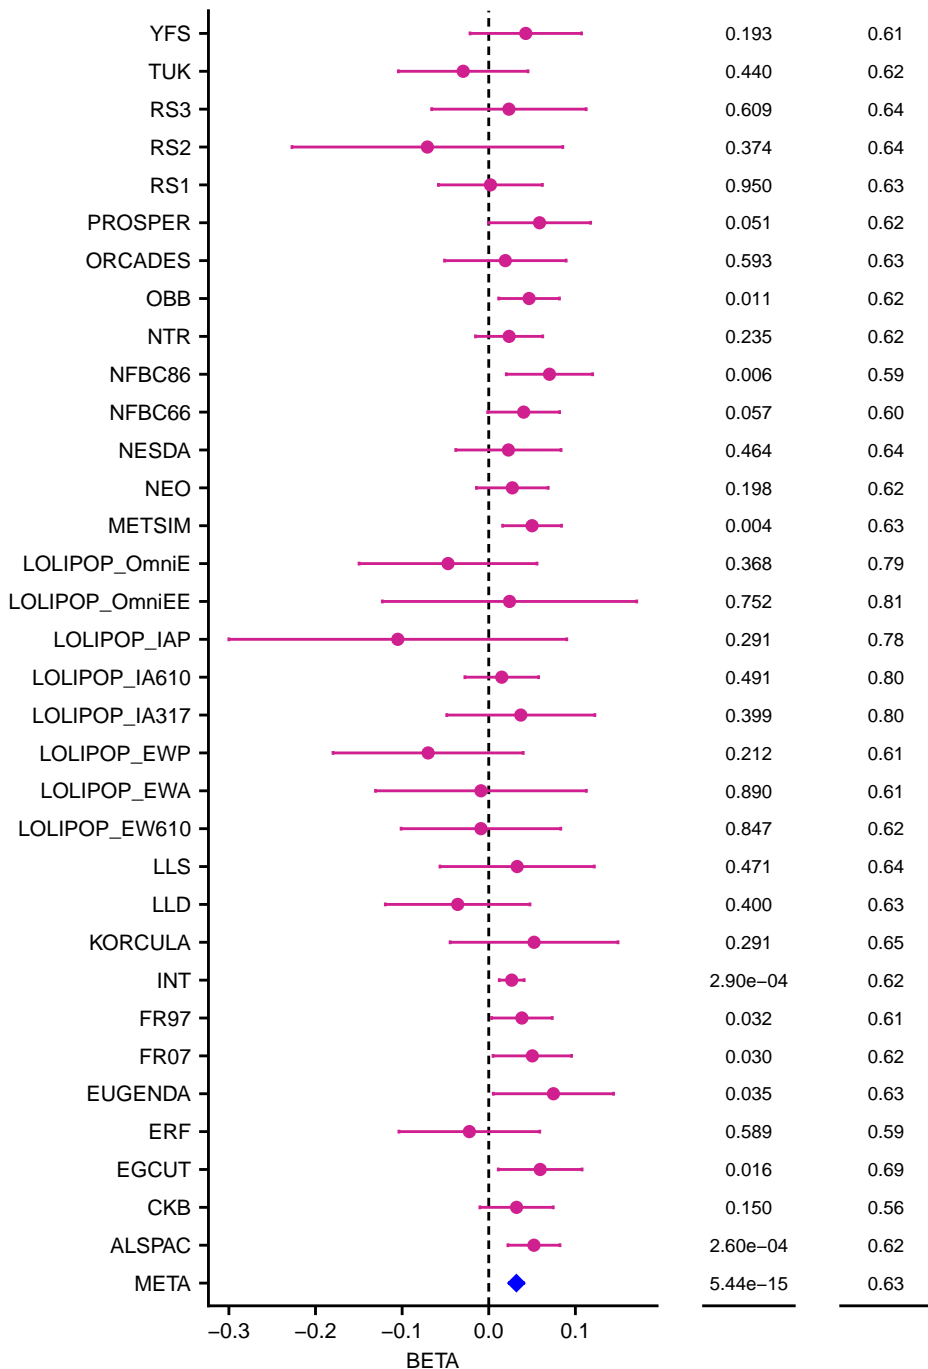

chr3:30758956:T Ala

P-value

EAF

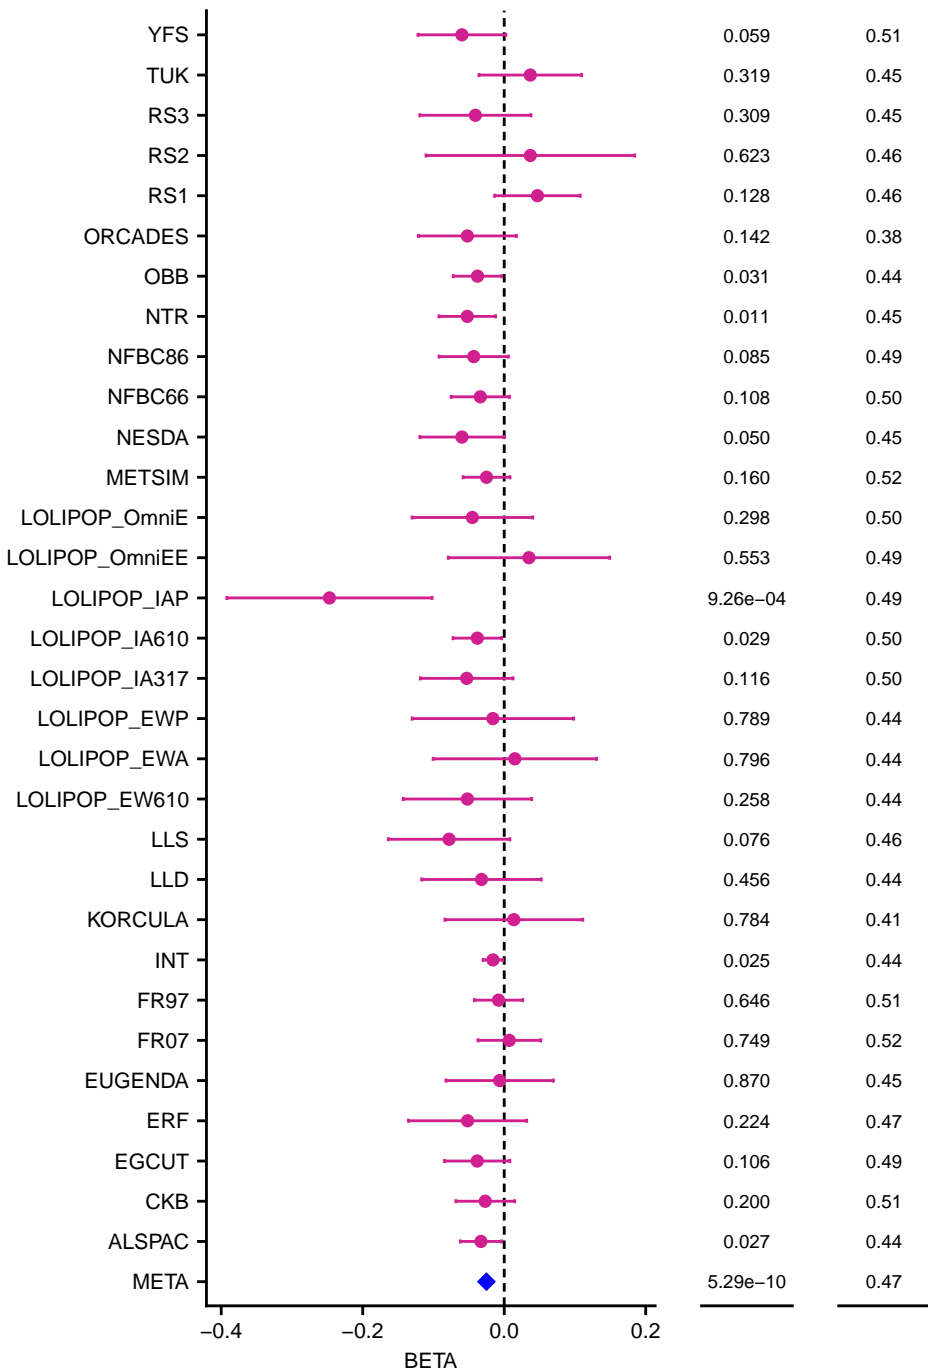

chr3:38444273:A Crea

P-value

EAF

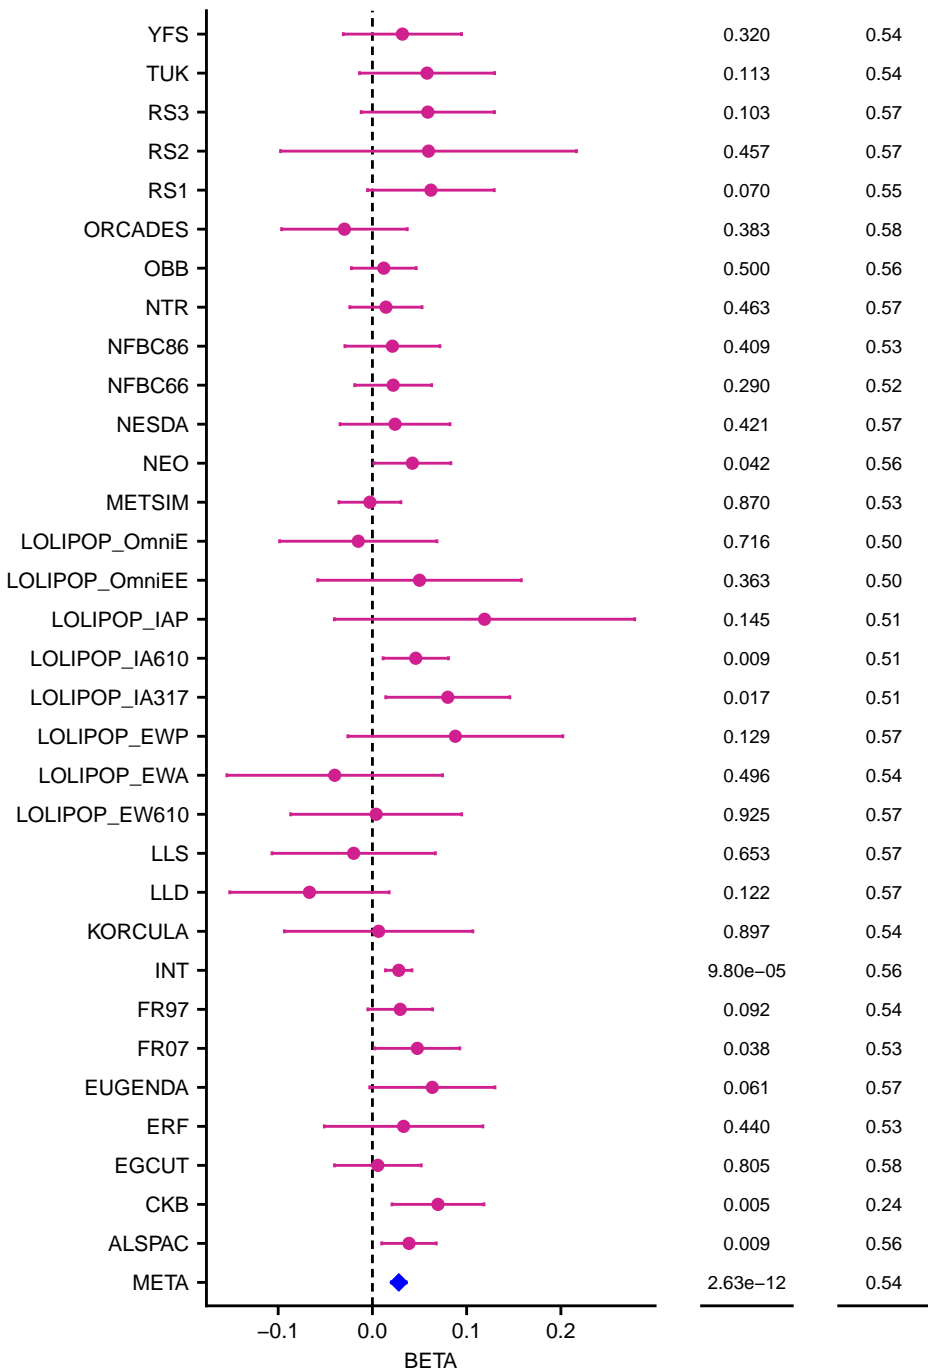

chr3:52852538:T Crea

P-value

EAF

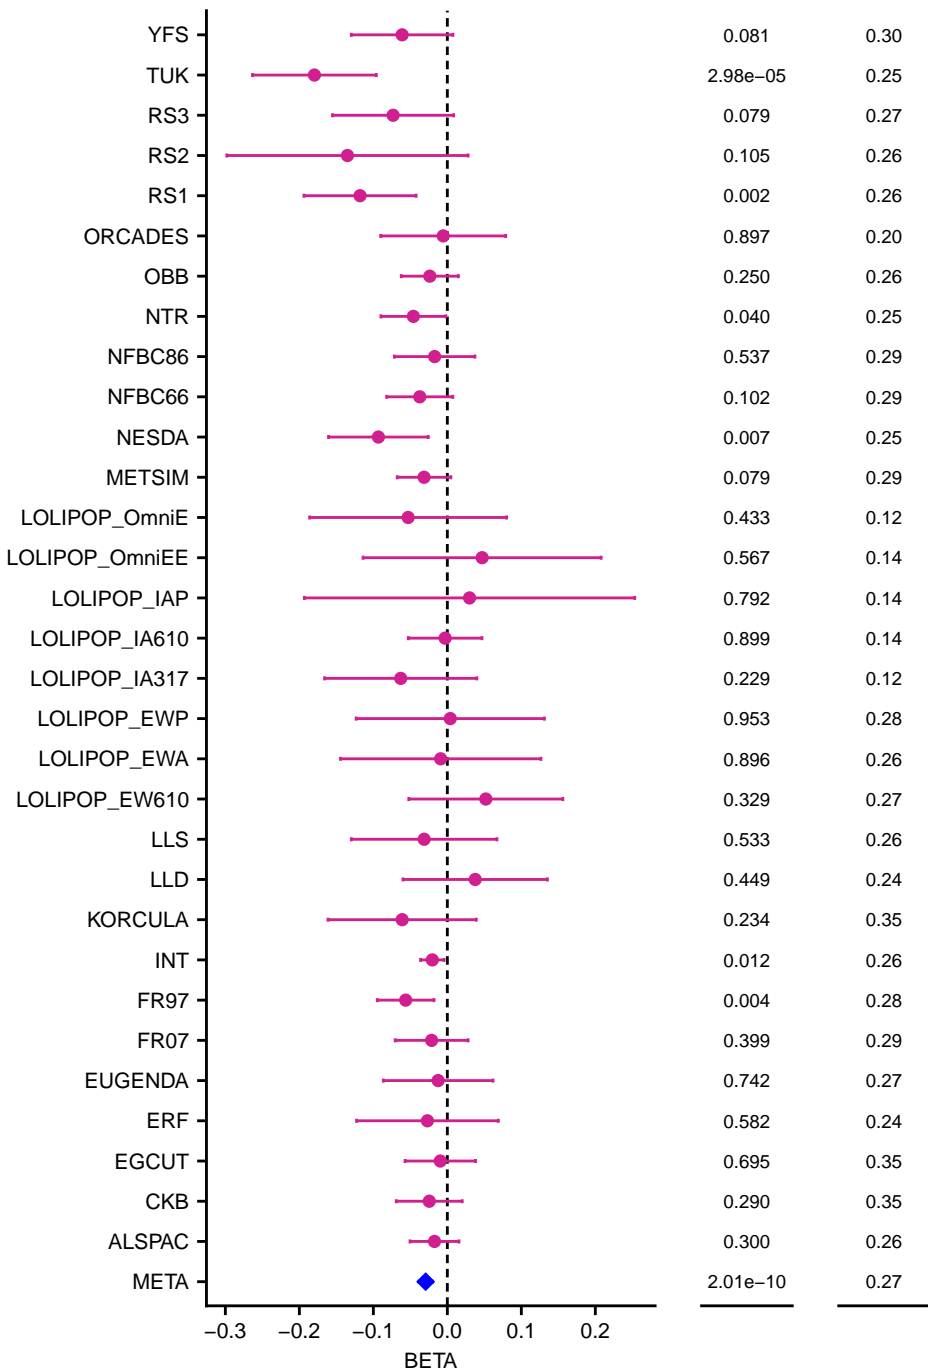

## chr3:57420366:A Serum-TG

P-value

EAF

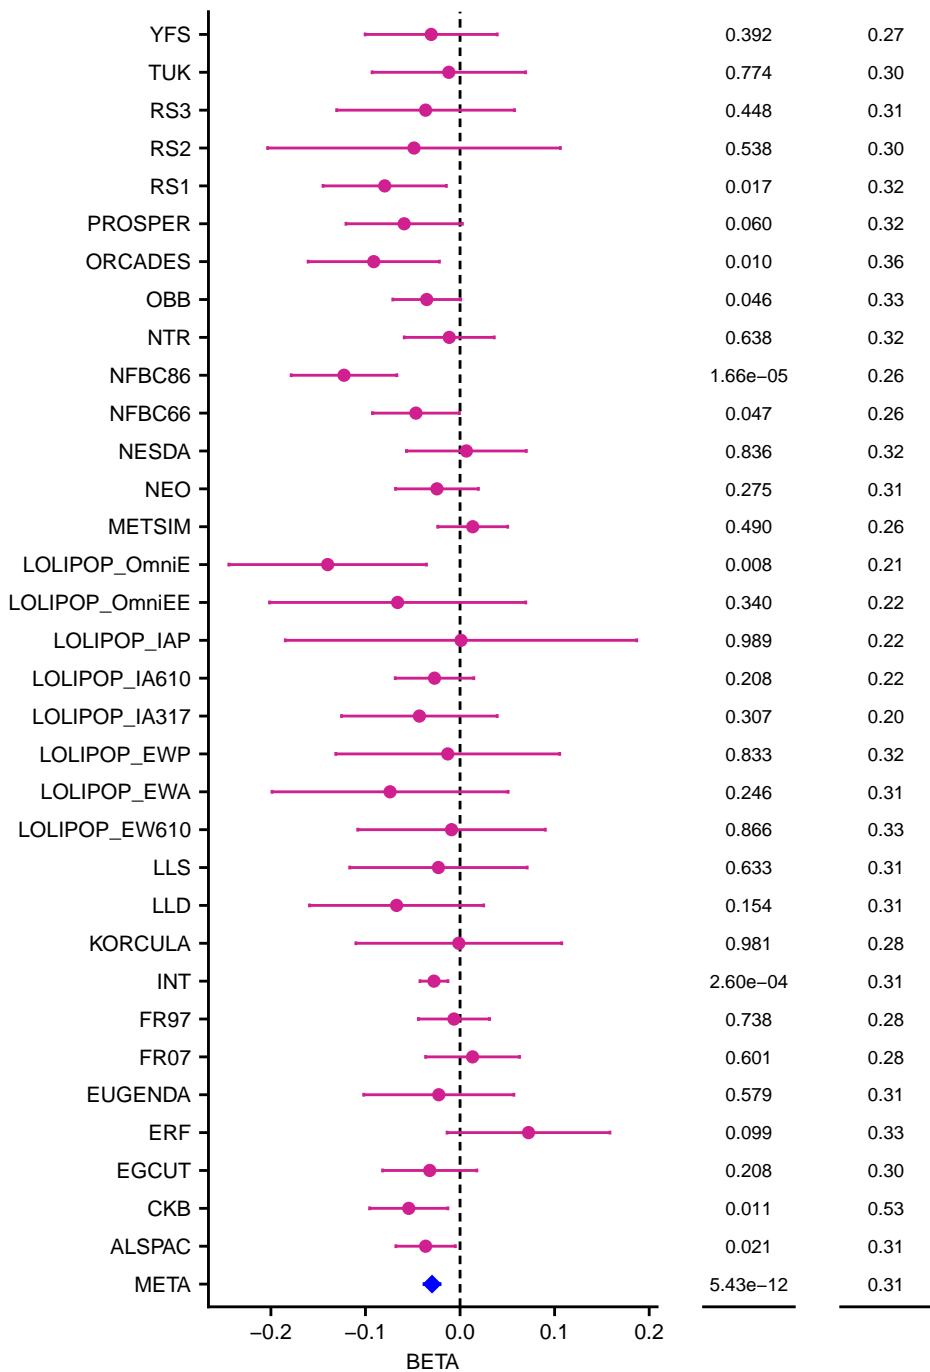



## chr3:98383562:A S-HDL-P

P-value

EAF

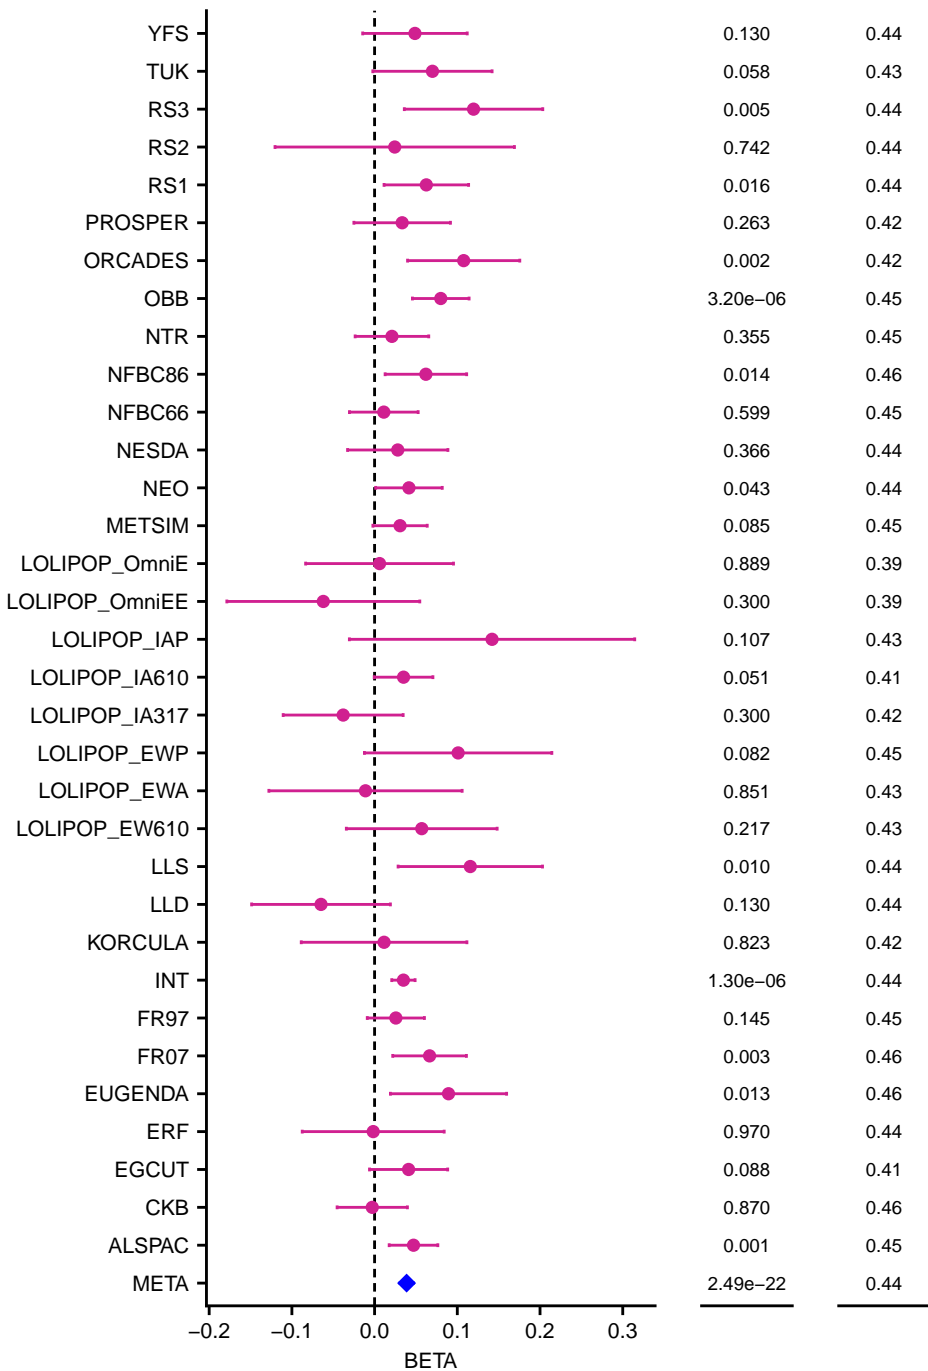

## chr3:119631814:A ApoA1

P-value

EAF

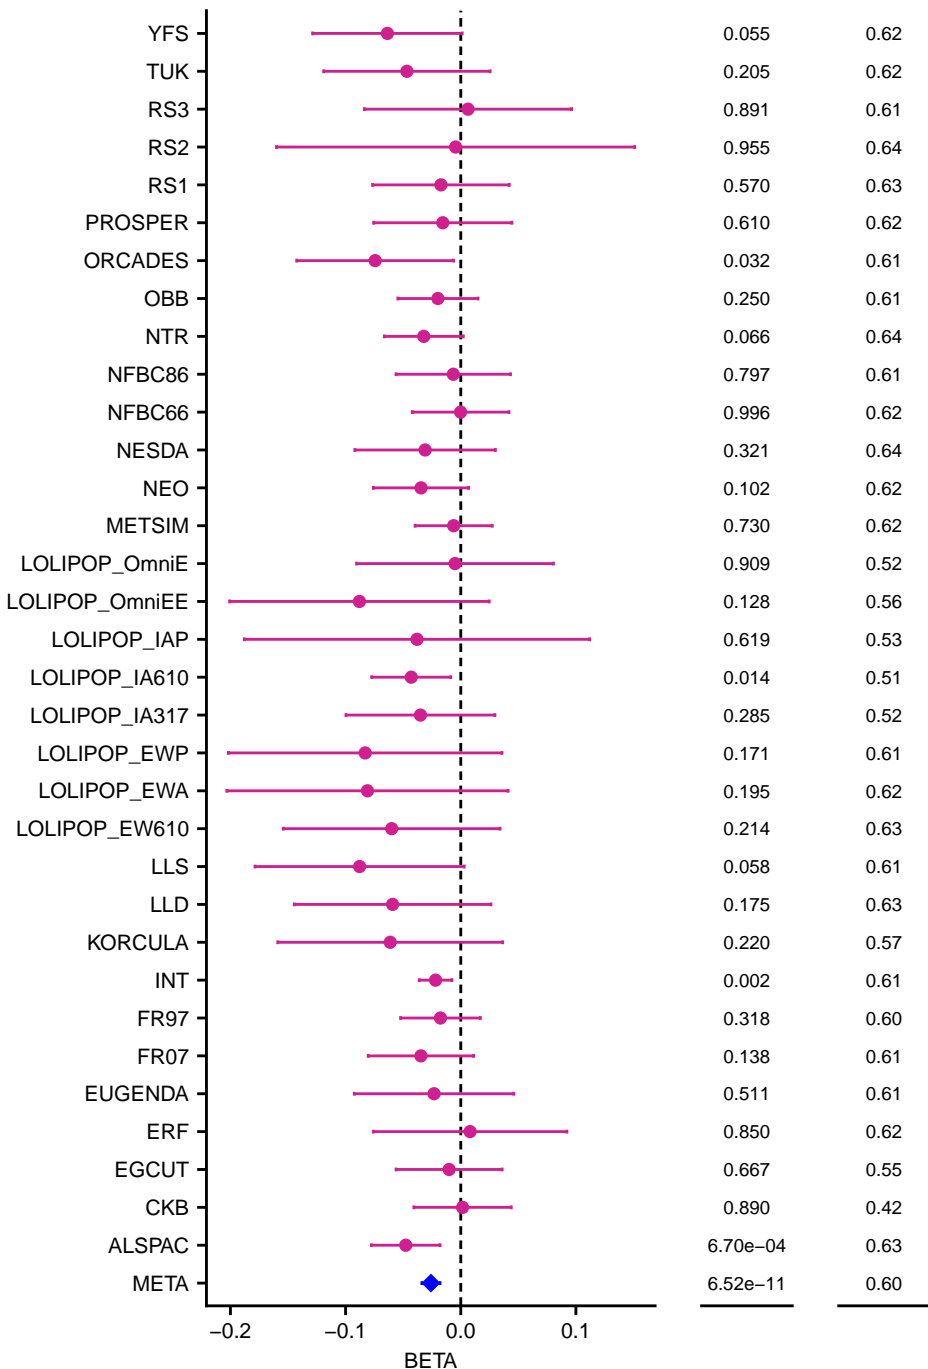

chr3:123093530:T Ala

P-value

EAF

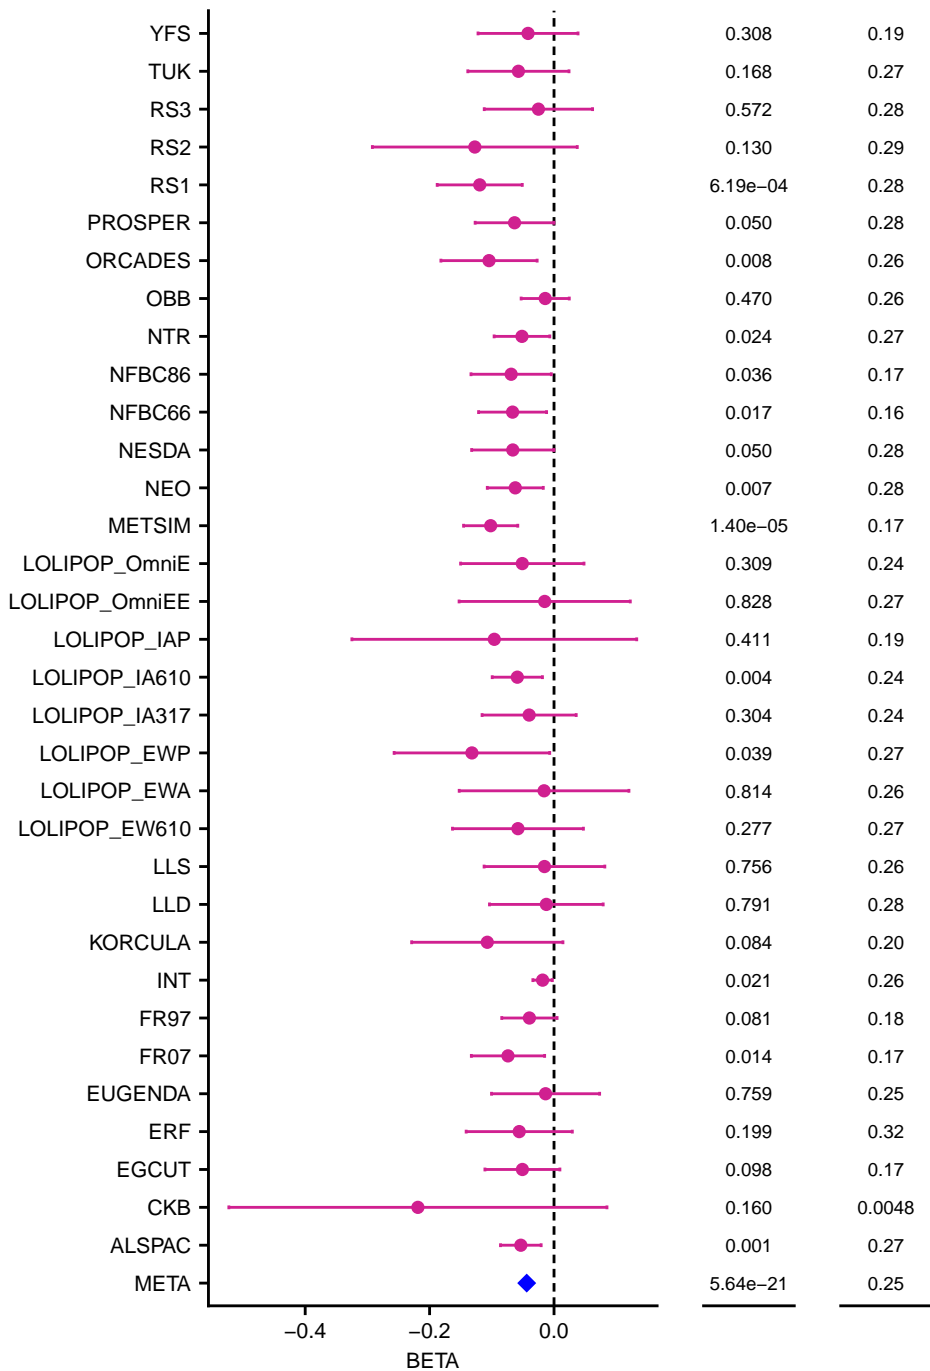

## chr3:125905080:A Gly

P-value

EAF

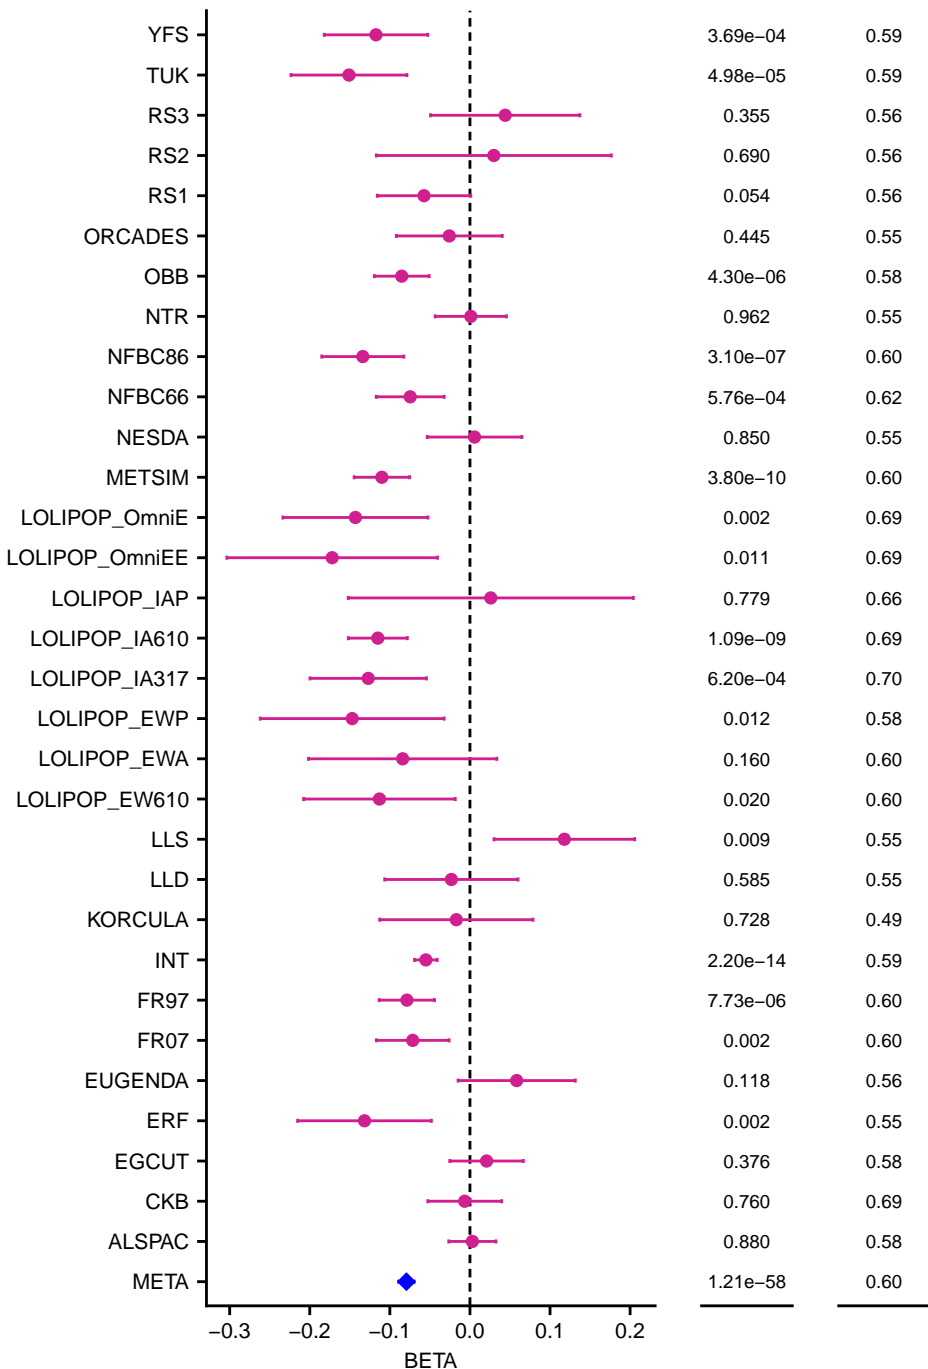

## chr3:133482230:A LDL-D

P-value

EAF

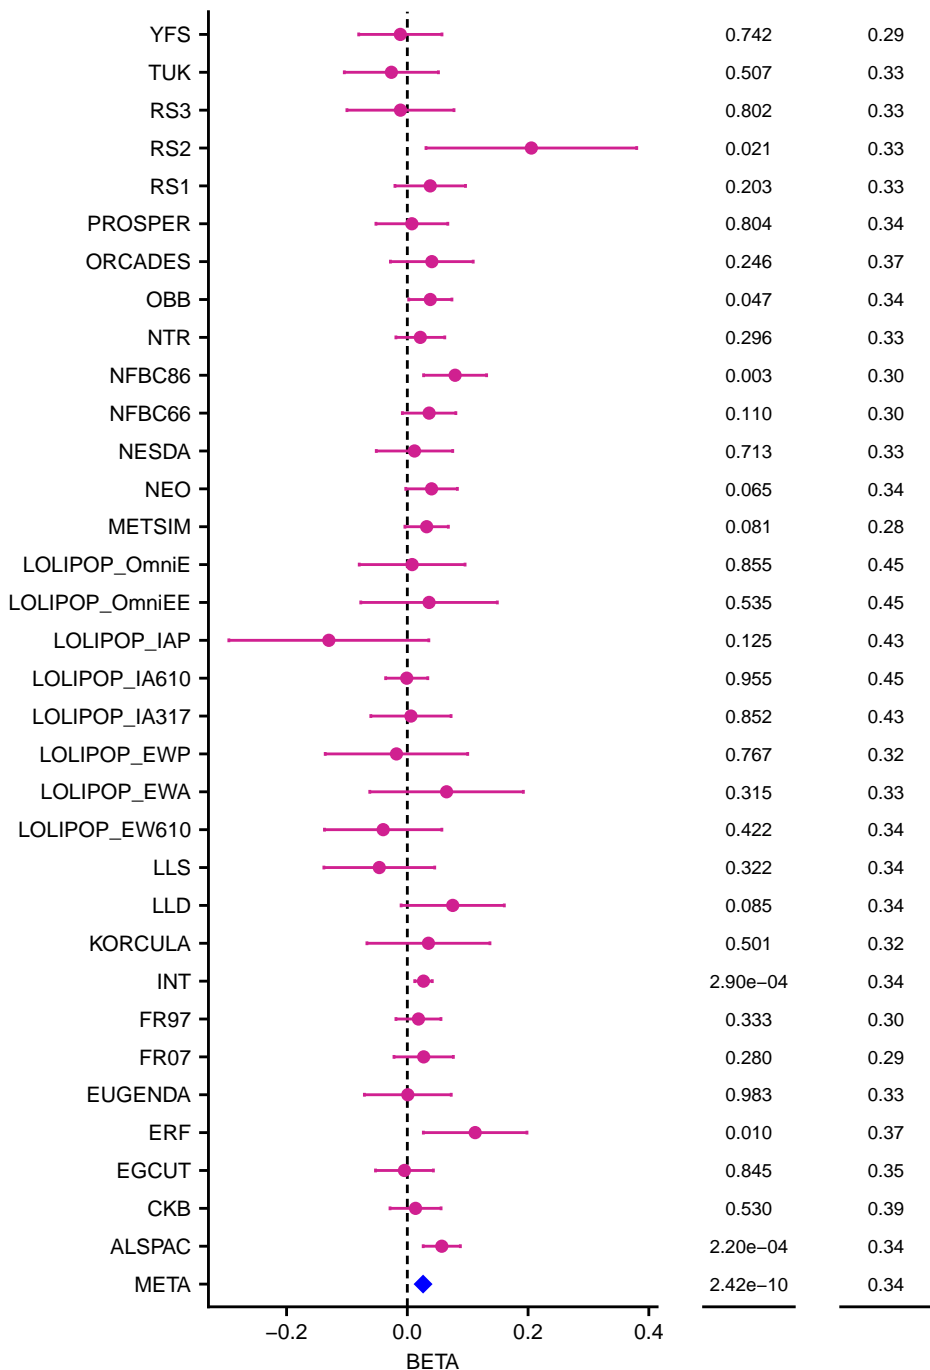

## chr3:135932359:T IDL-TG

P-value

EAF

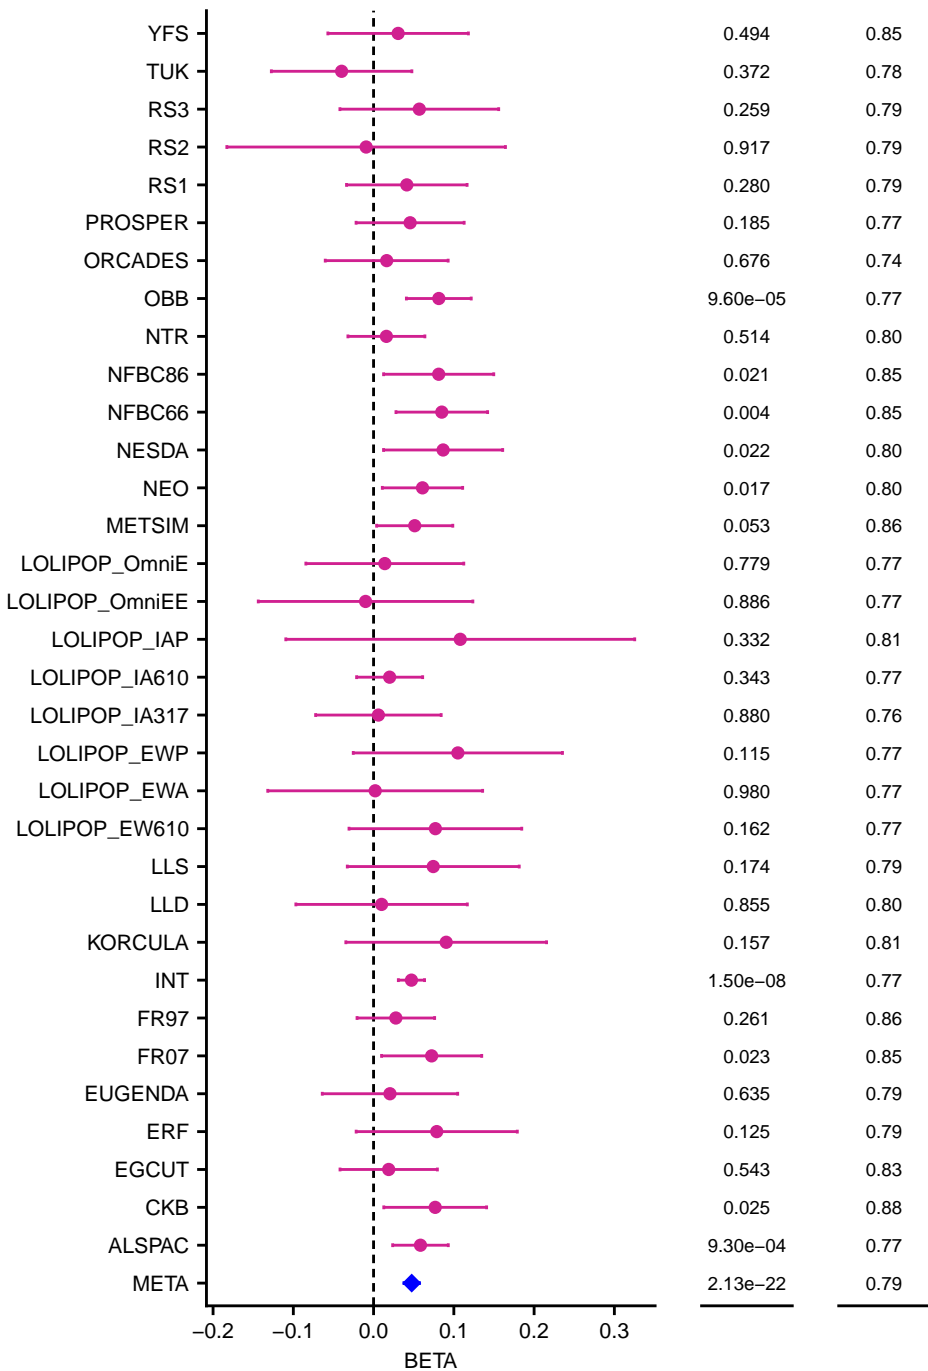

chr3:141674548:A Crea

P-value

EAF

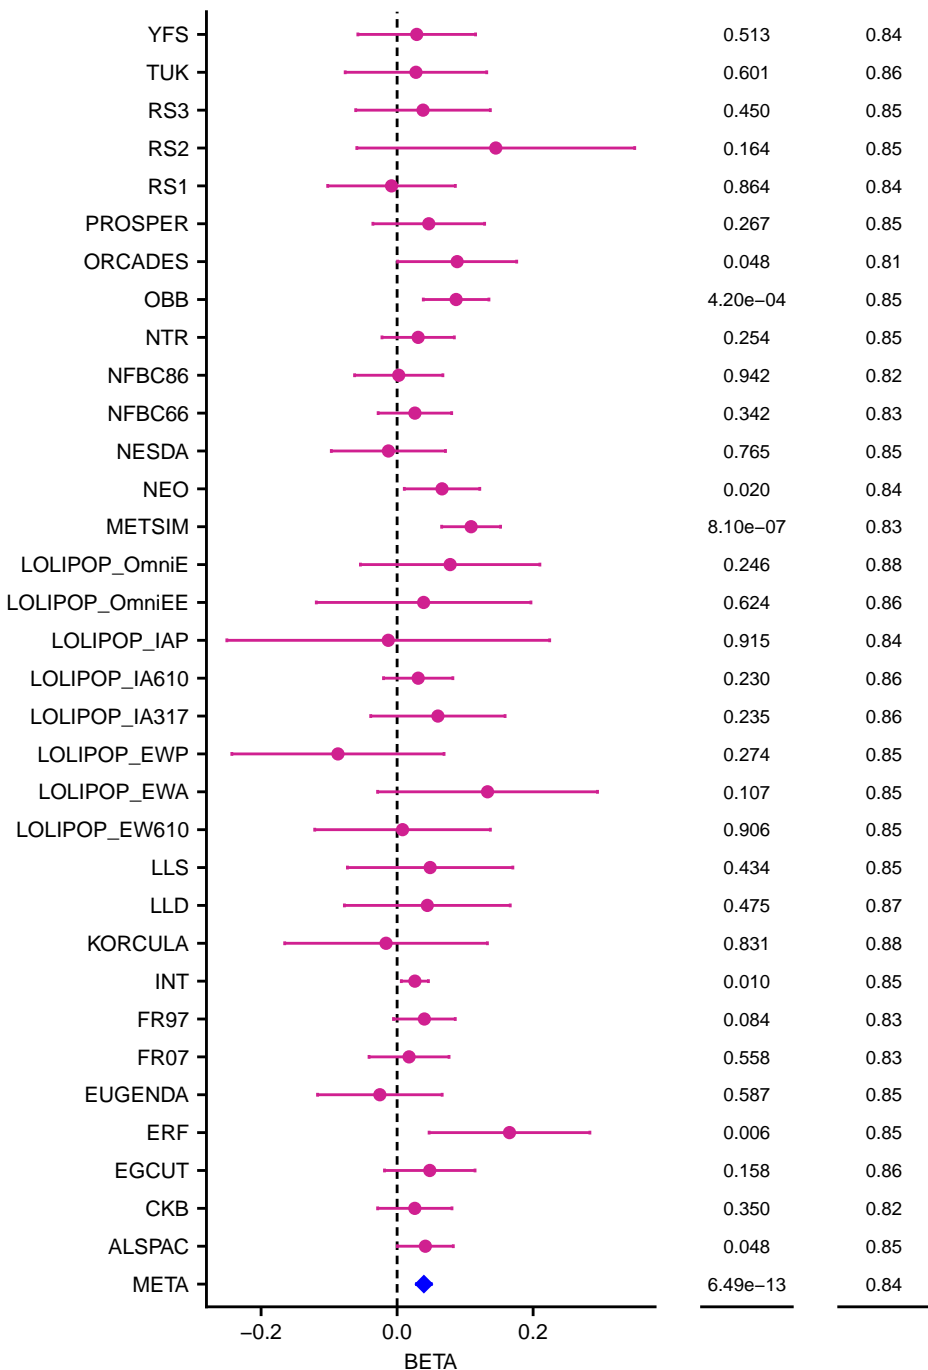

chr3:160165608:T Ala

P-value

EAF

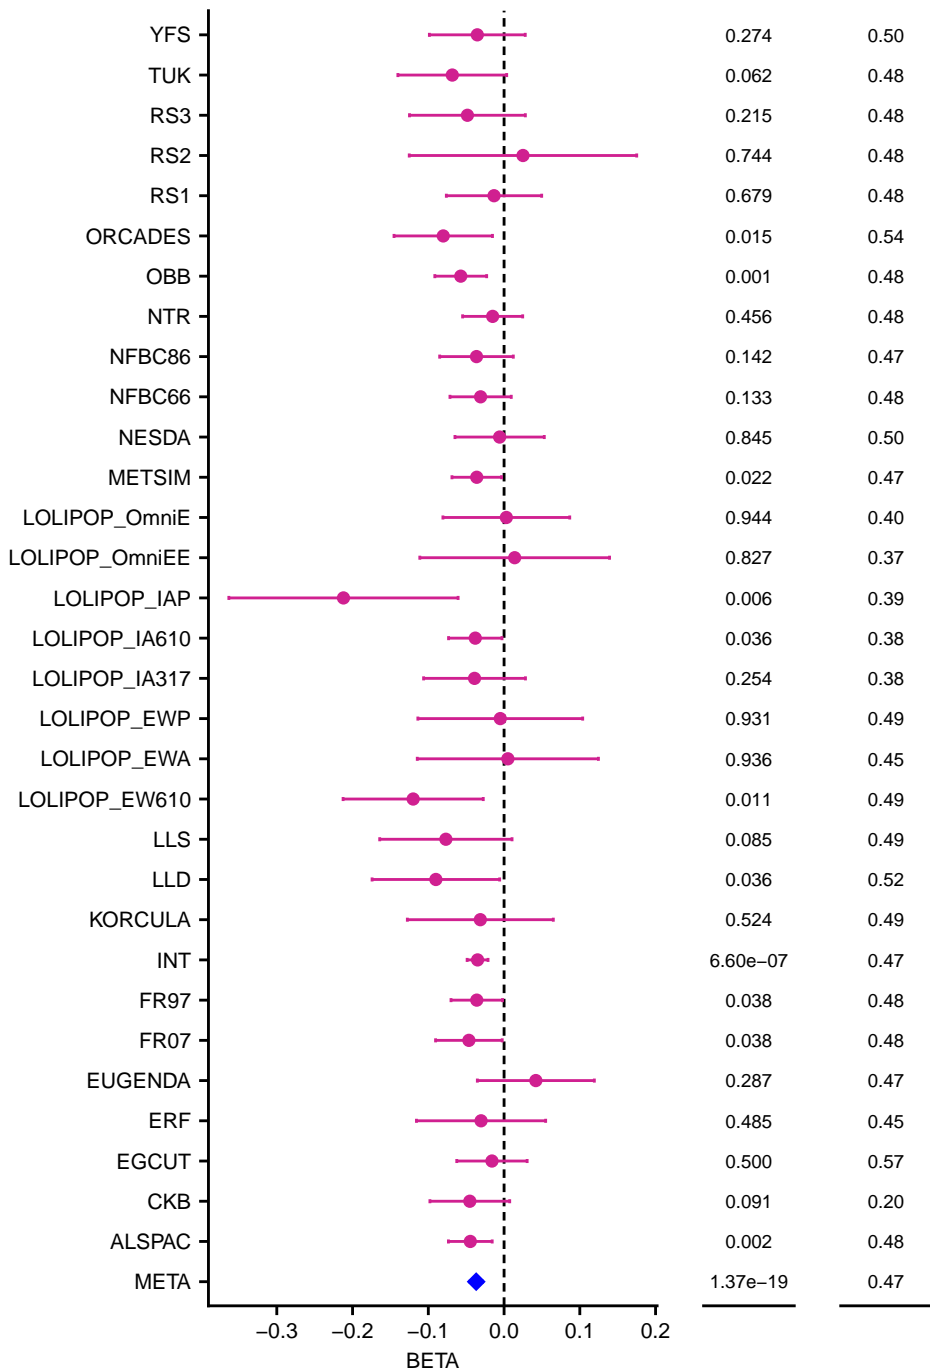



chr3:170705693:A Gic

P-value

EAF

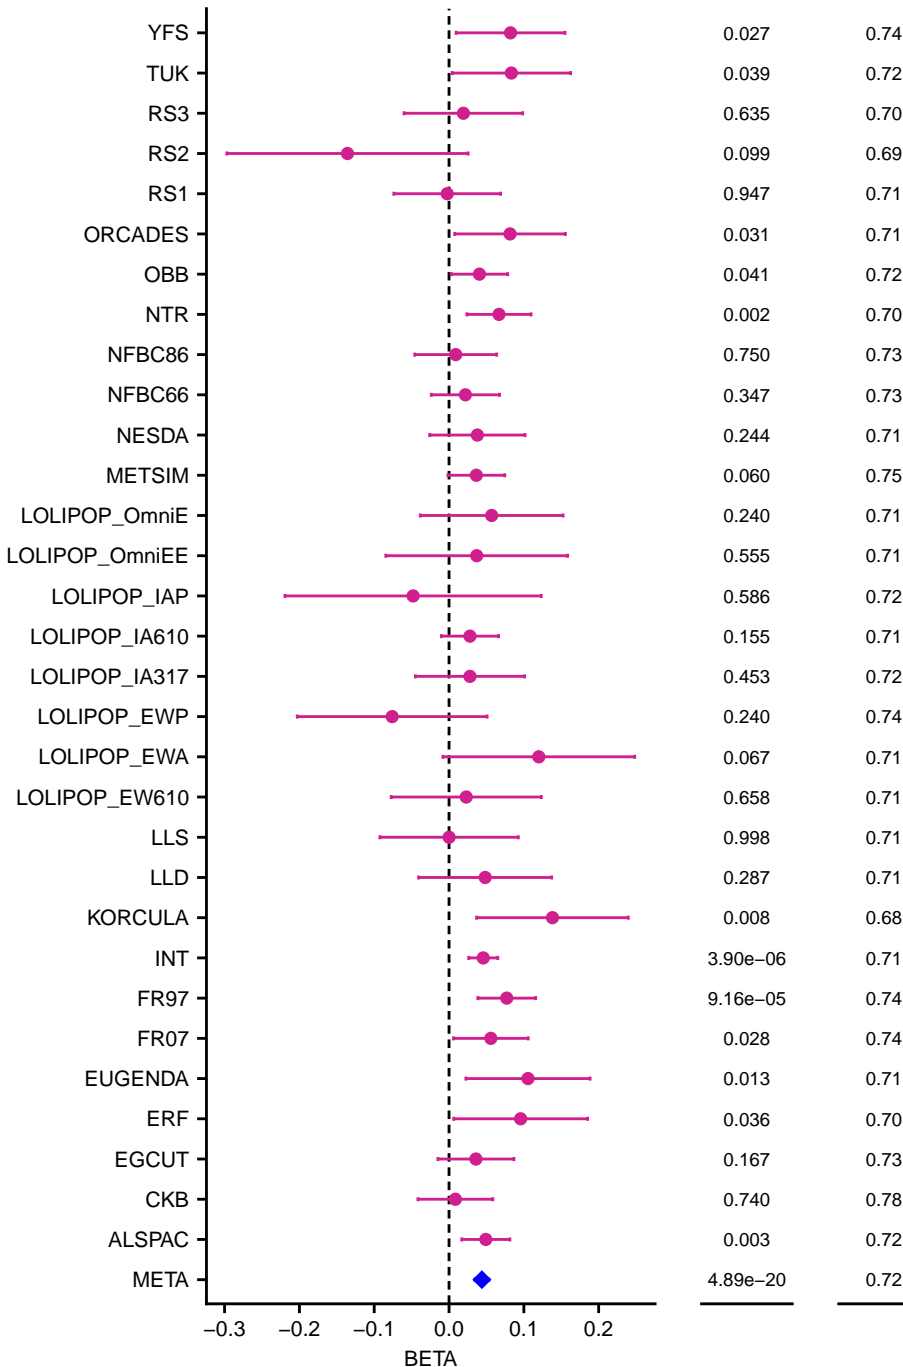

chr3:186454180:A His

P-value

EAF

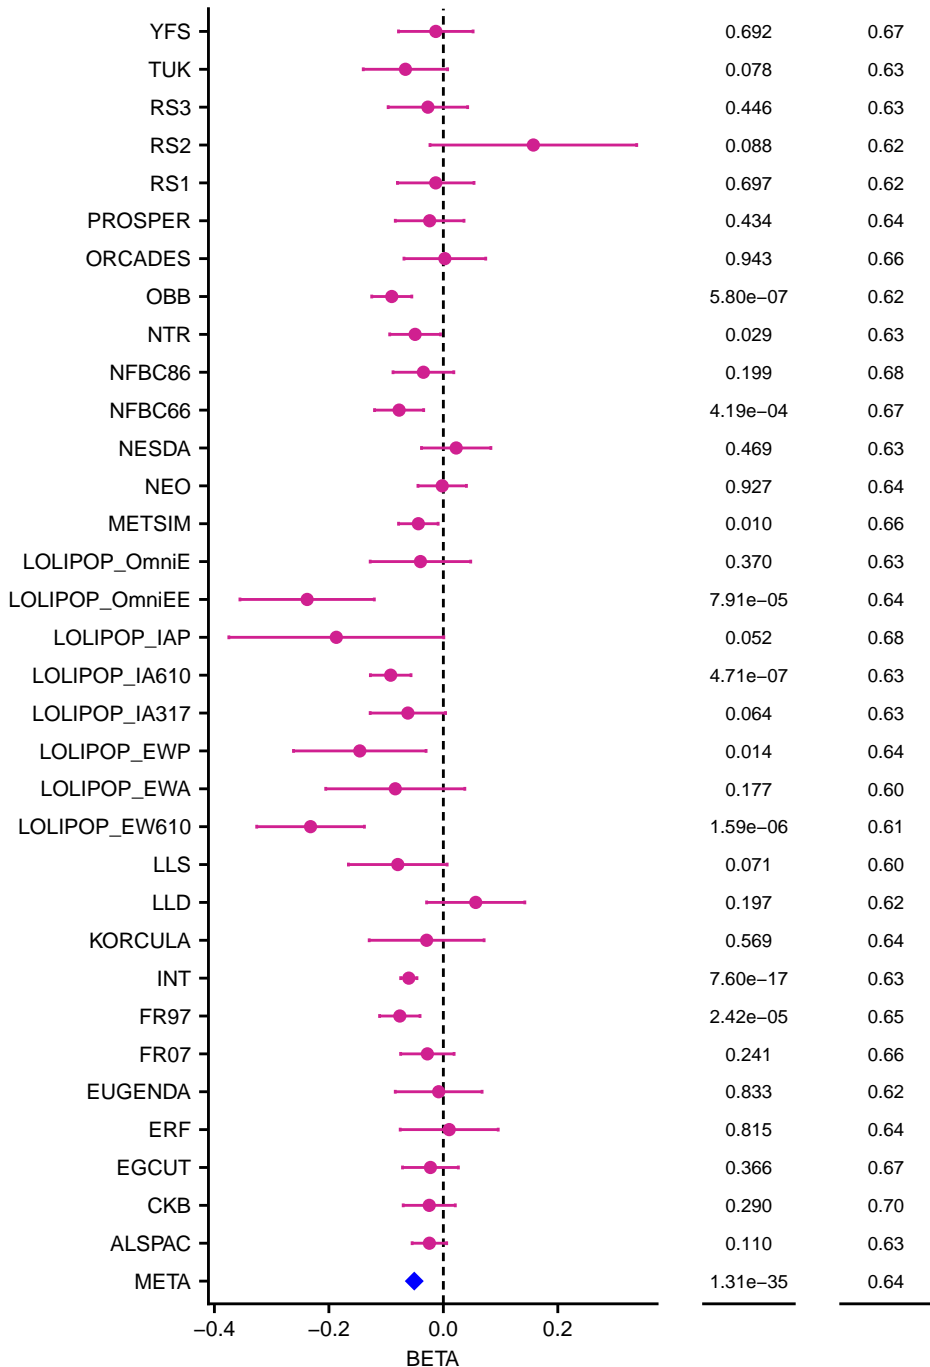

## chr4:3452345:A GlycA

P-value

EAF

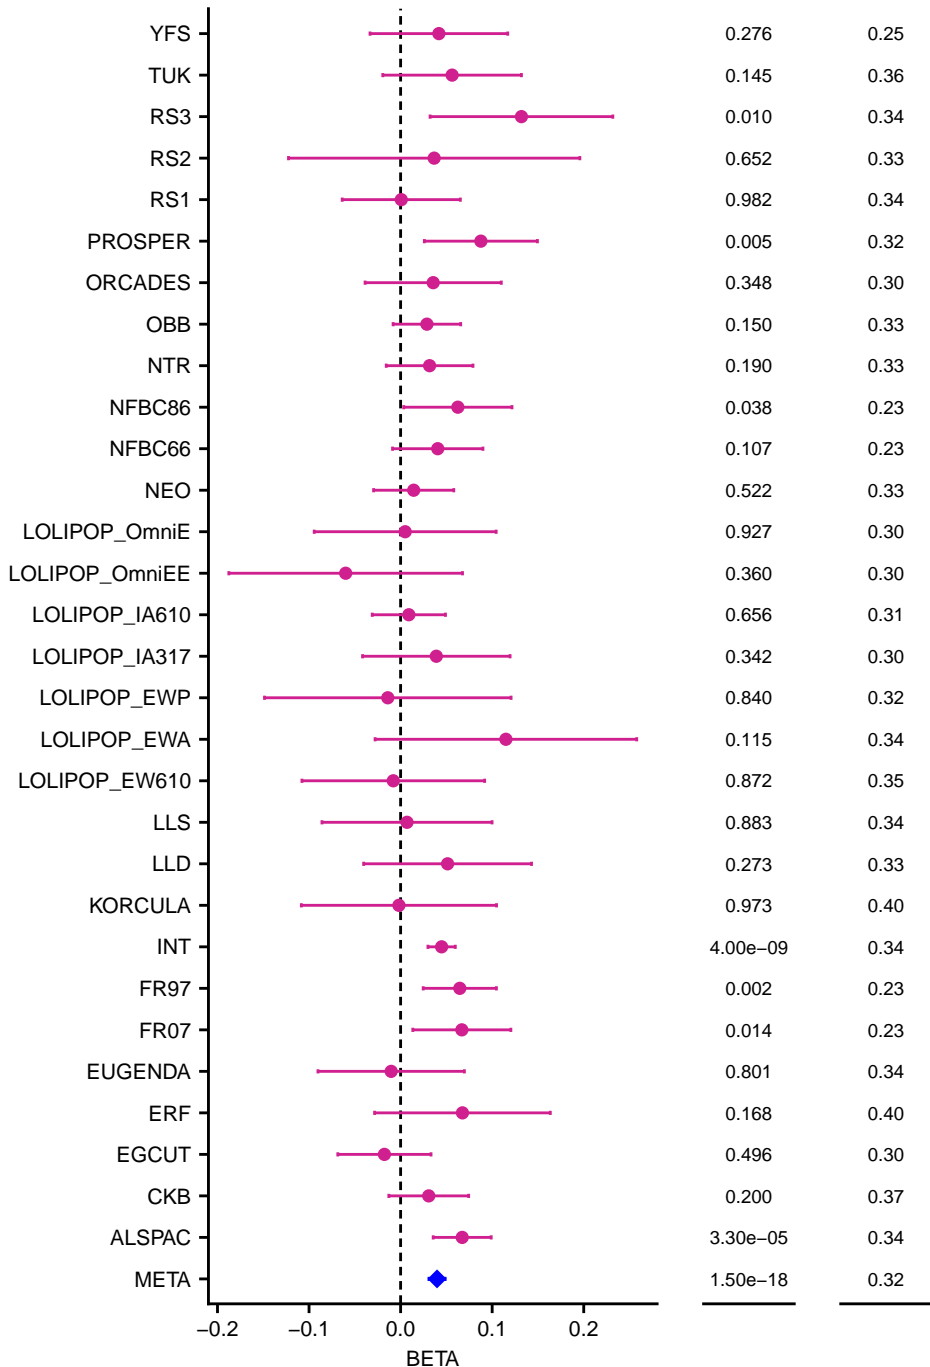

chr4:26152727:A Alb

P-value

EAF

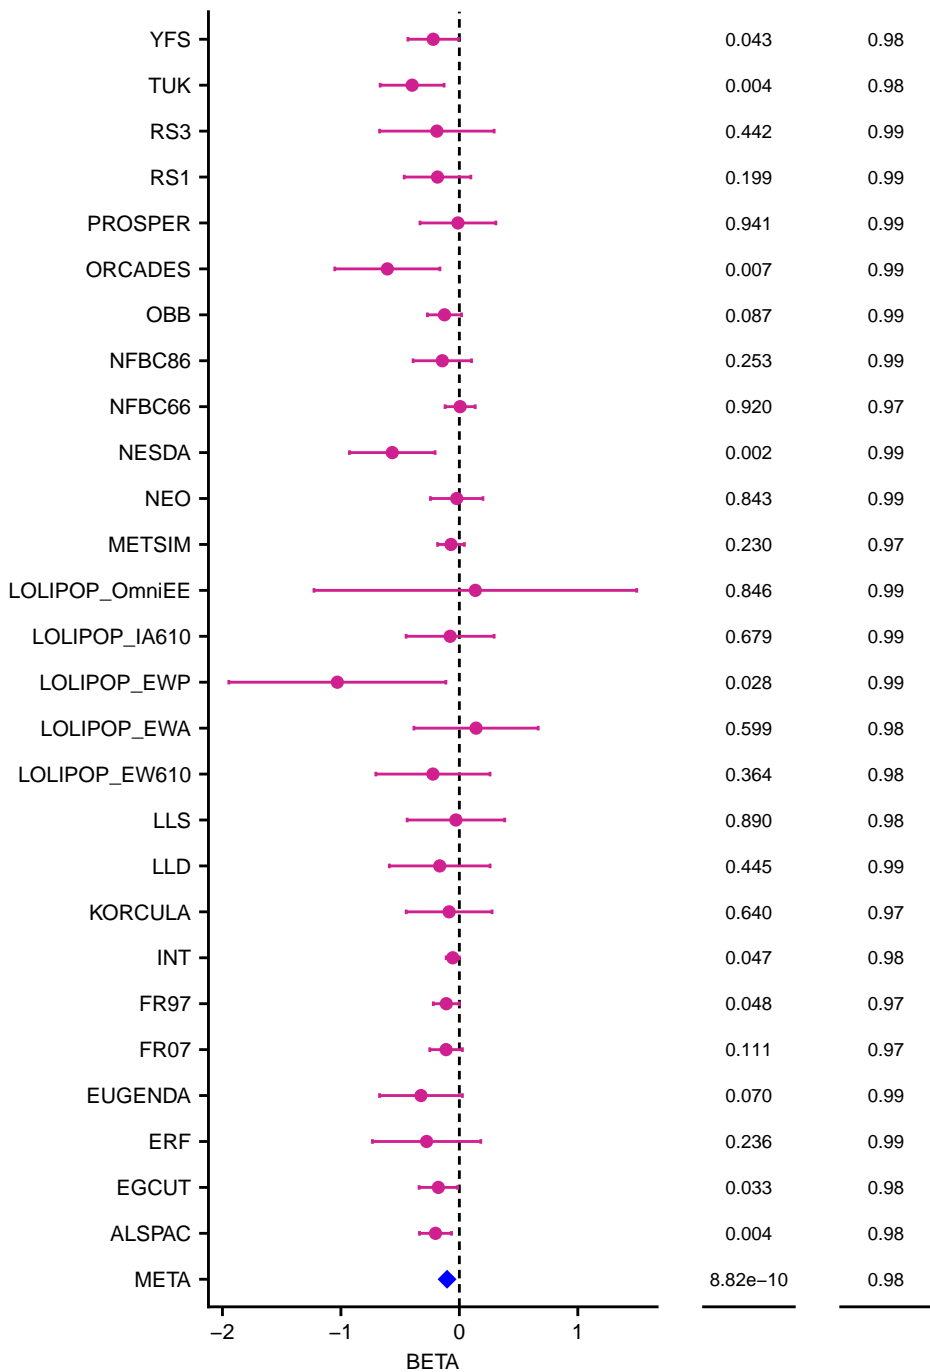

## chr4:69343287:A PC

P-value

EAF

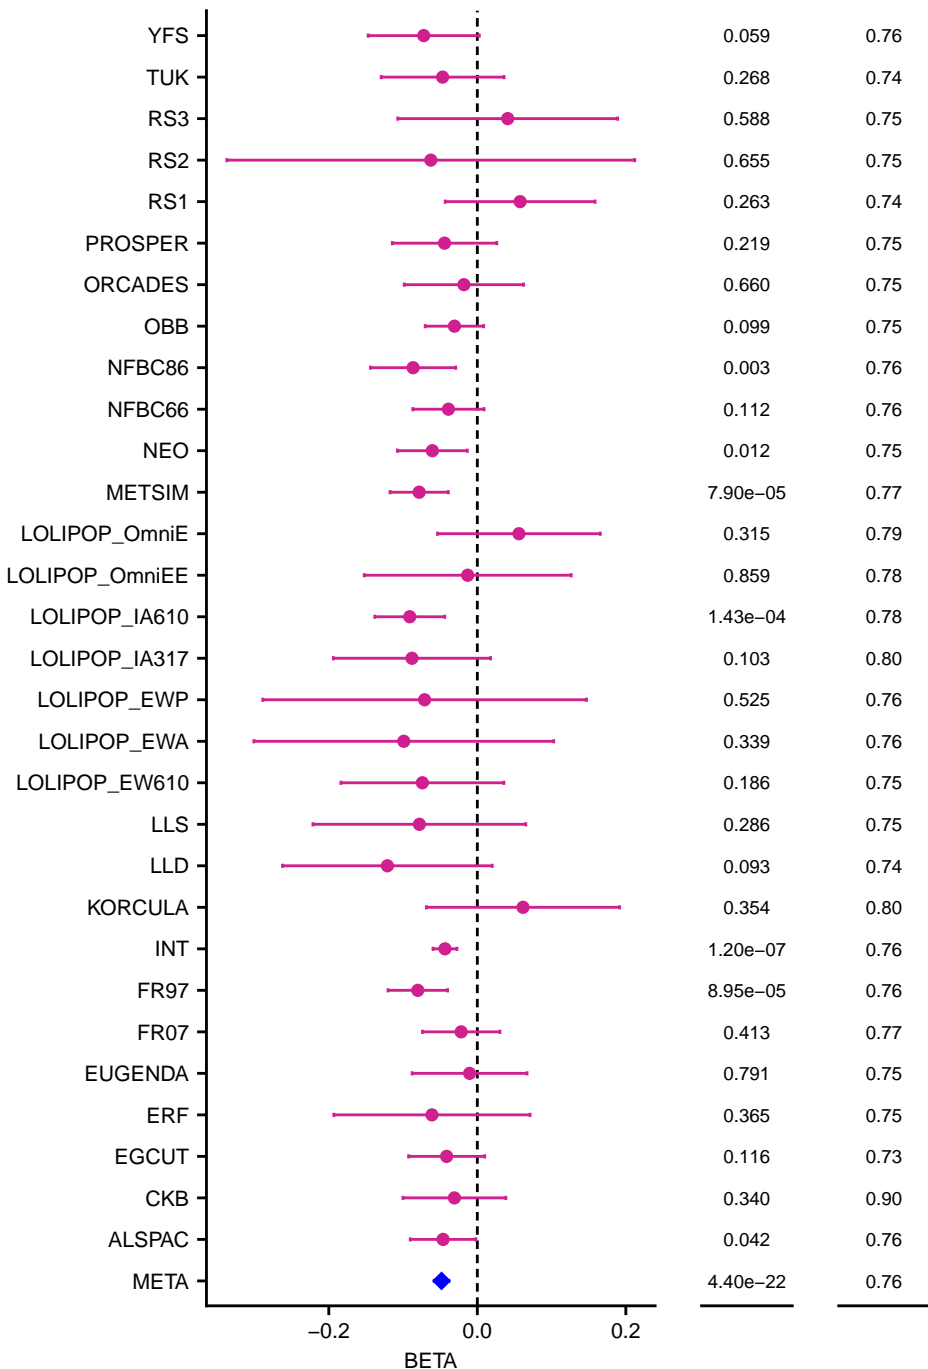

chr4:74033564:C Alb

P-value

EAF

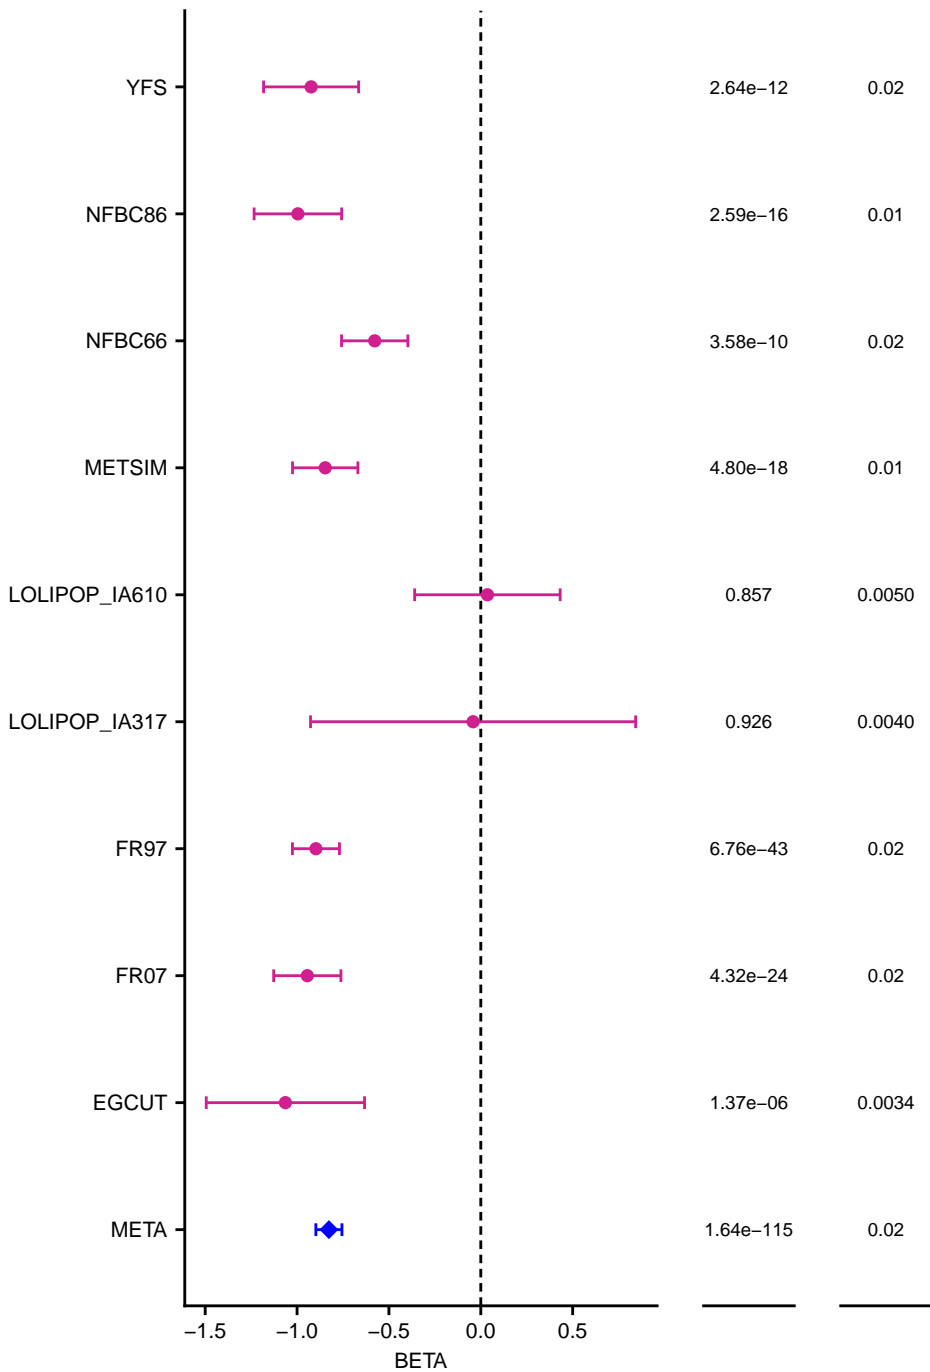

chr4:89222827:T Val

P-value

EAF

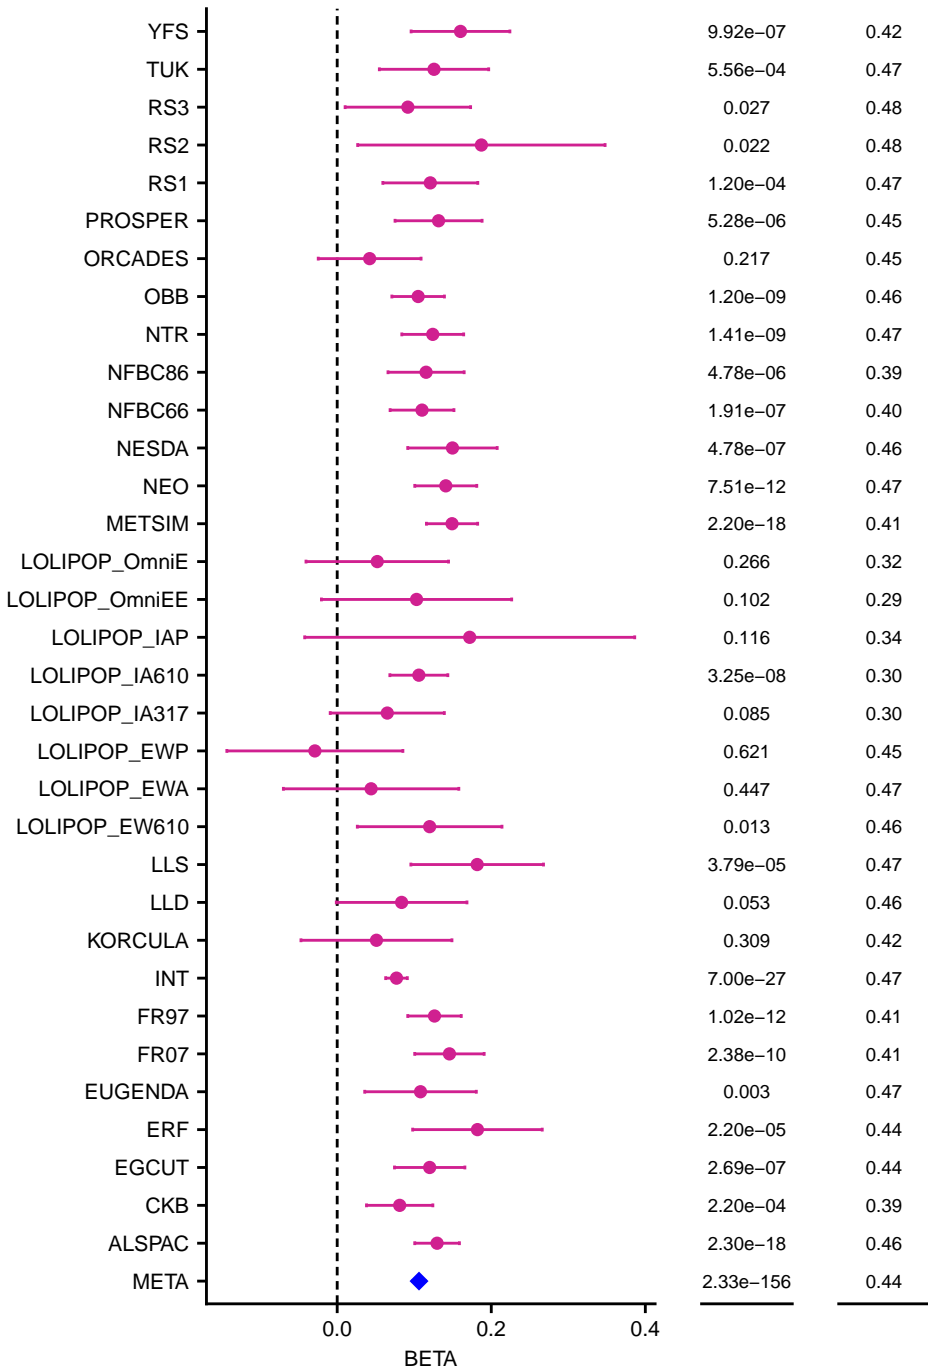

chr4:100065917:T Tyr

P-value

EAF

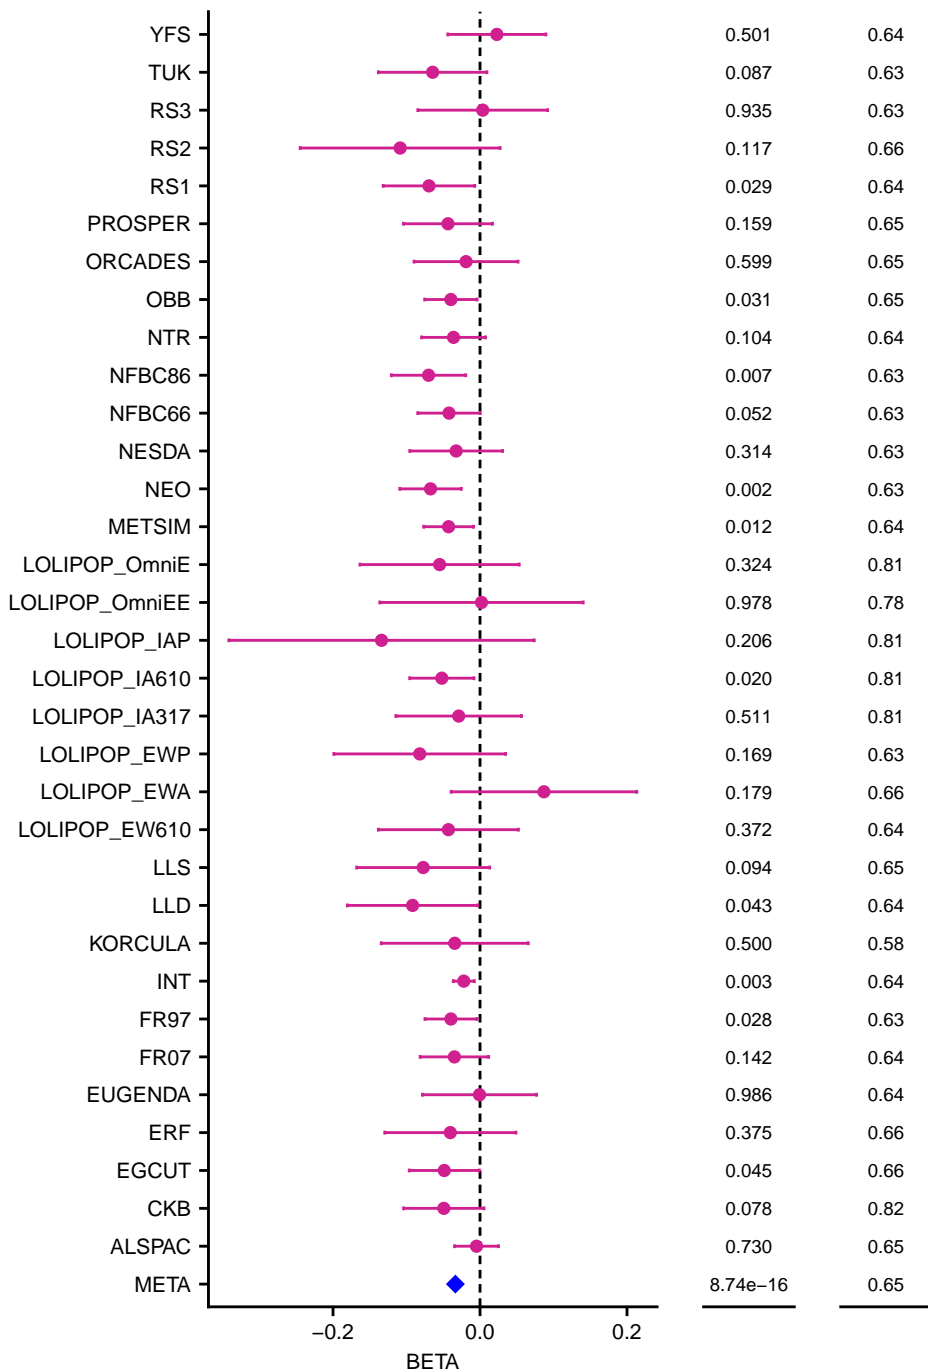



## chr4:103188709:T XL-HDL-C

P-value

EAF

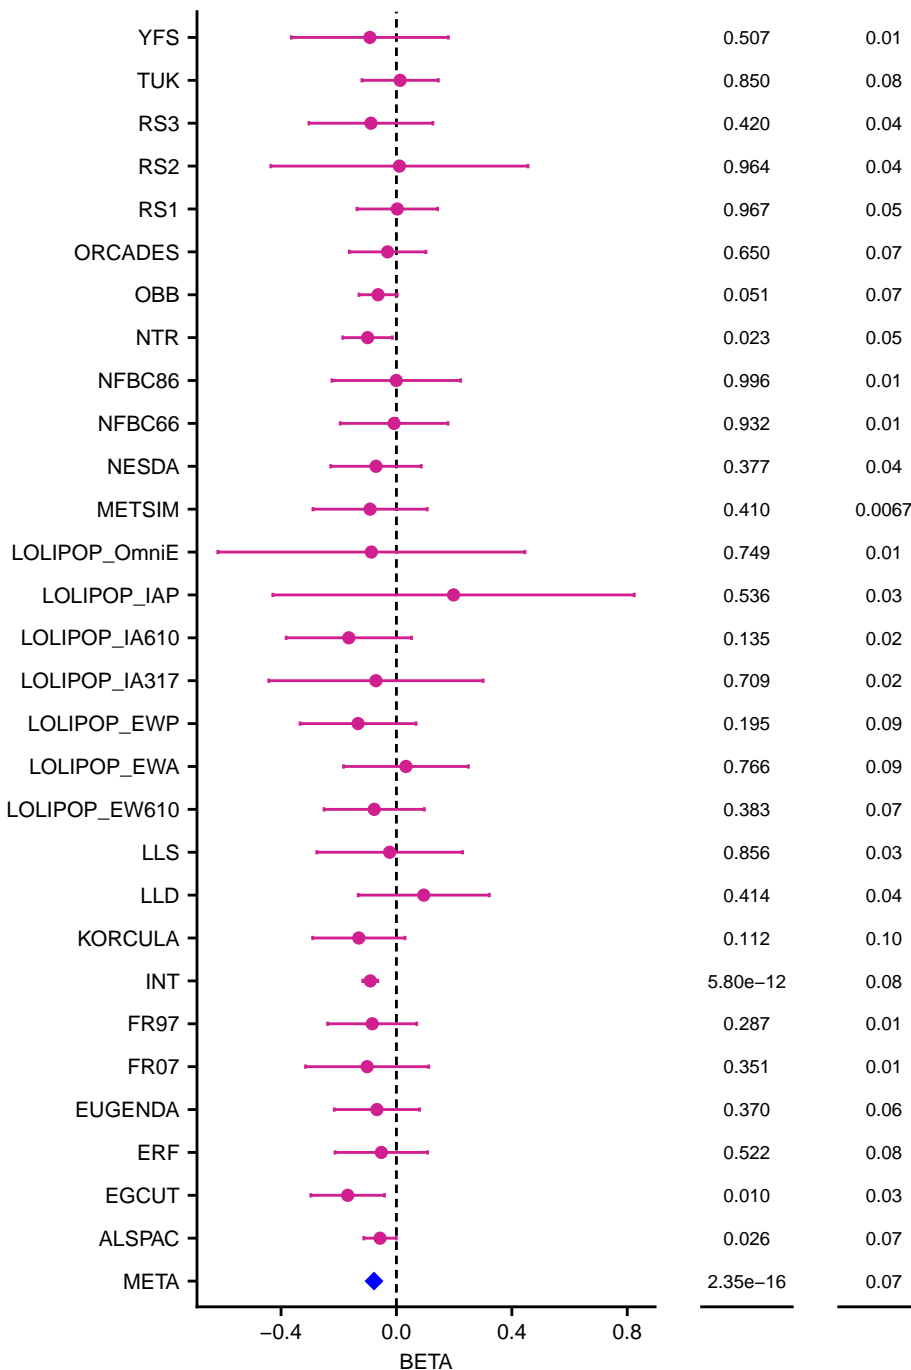

chr4:110638824:T M-HDL-TG\_percent

P-value

EAF

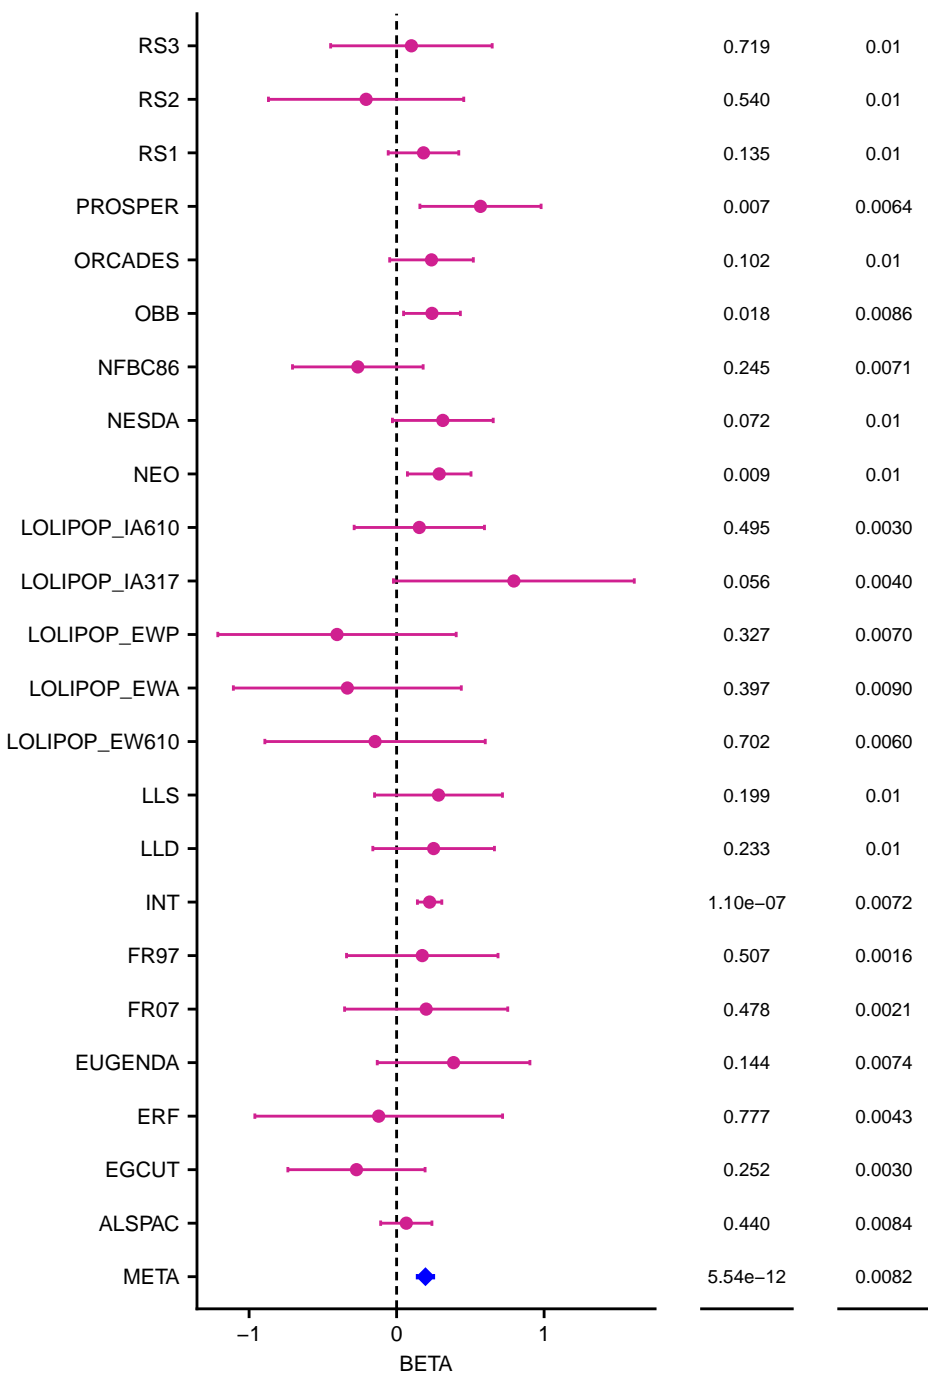

chr4:148979174:T Tyr

P-value

EAF

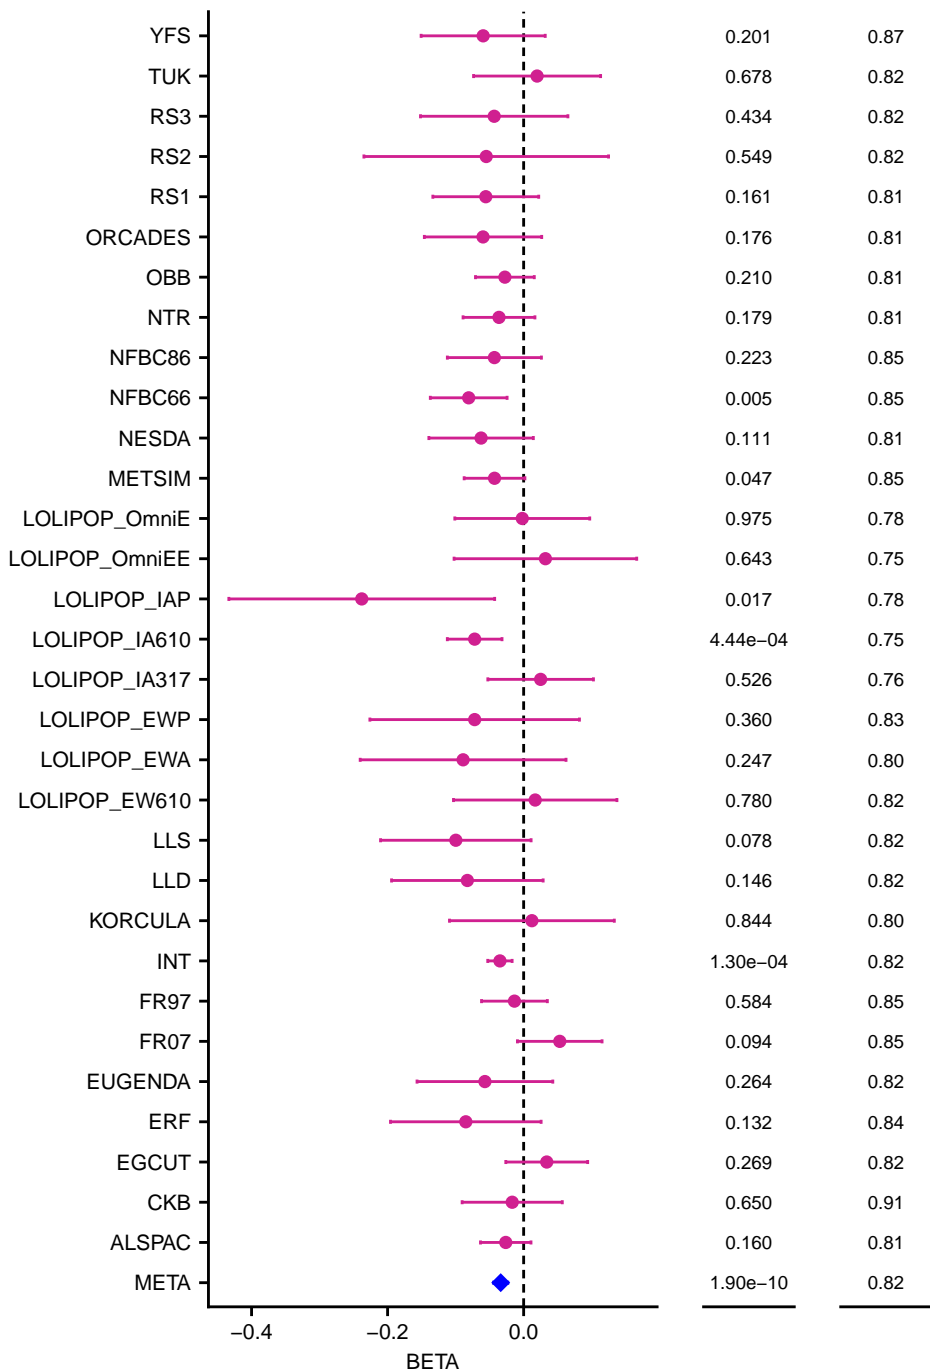

chr4:155471982:A Phe

P-value

EAF

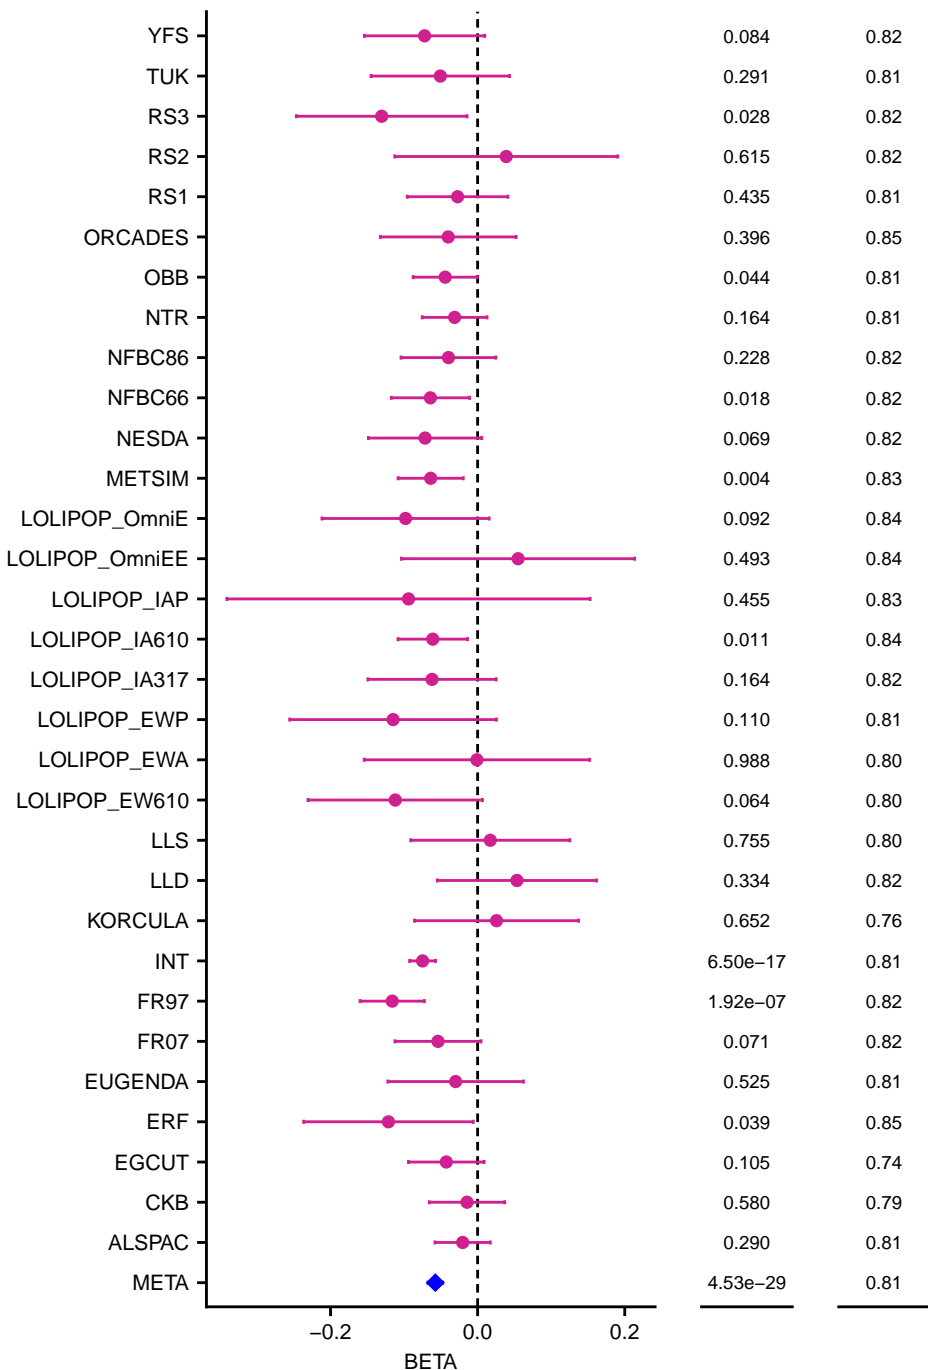

chr4:187157458:T Phe

P-value

EAF

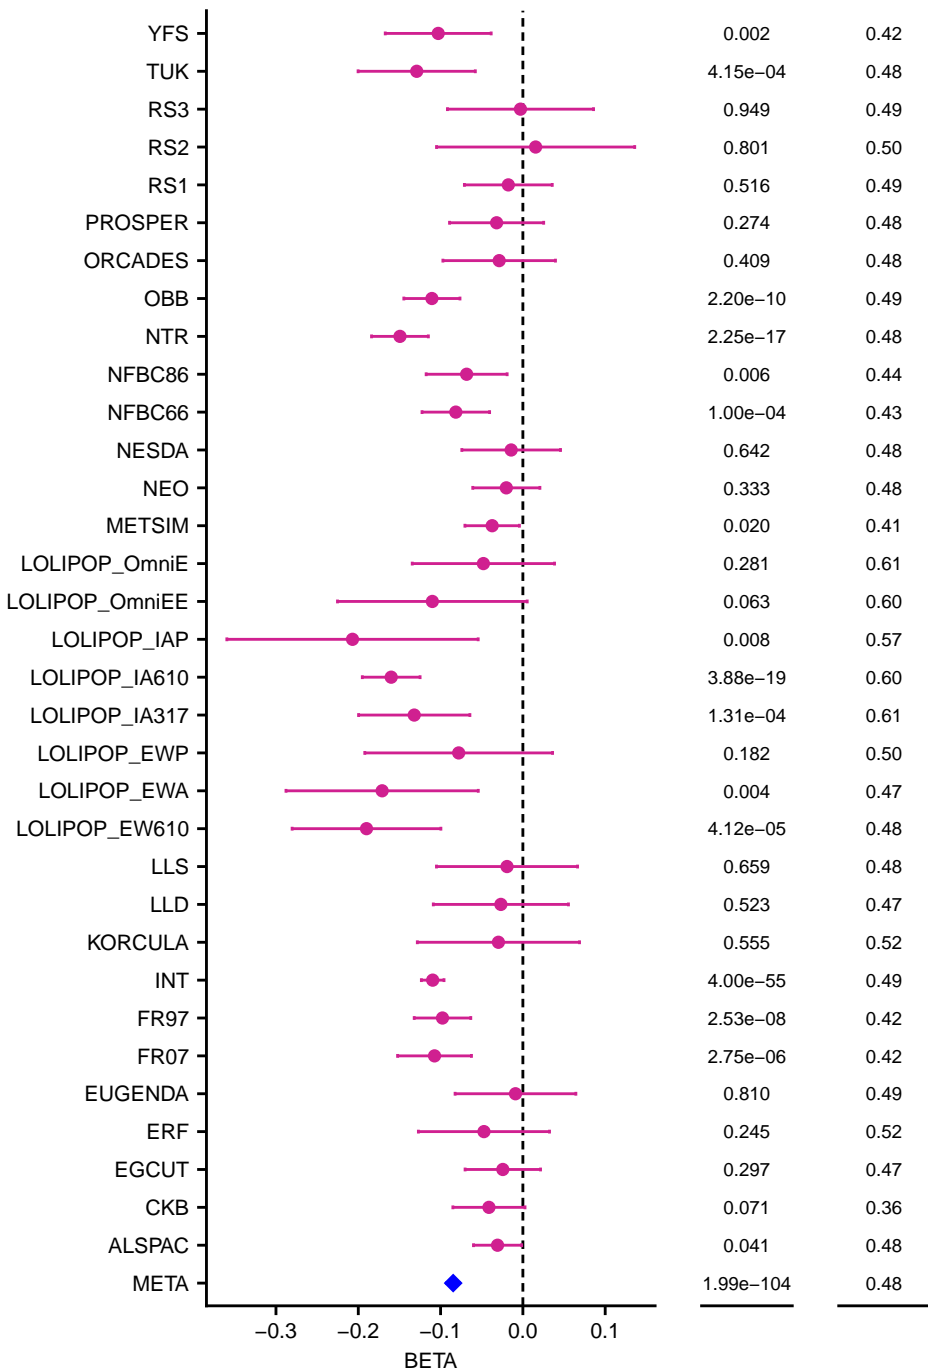

## chr5:14870691:C Cit

P-value

EAF

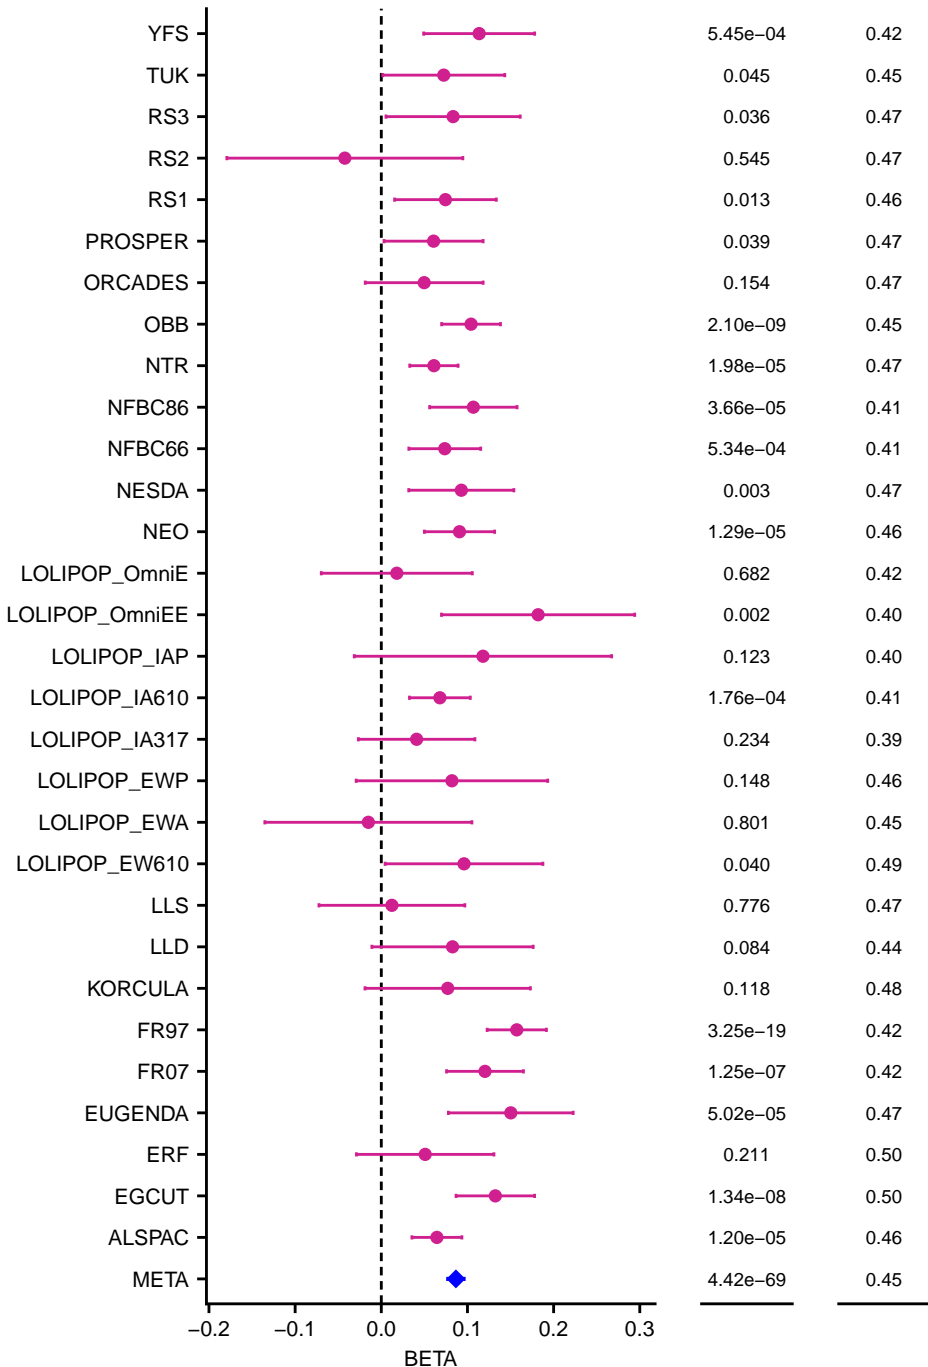

chr5:39421736:A Crea

P-value

EAF

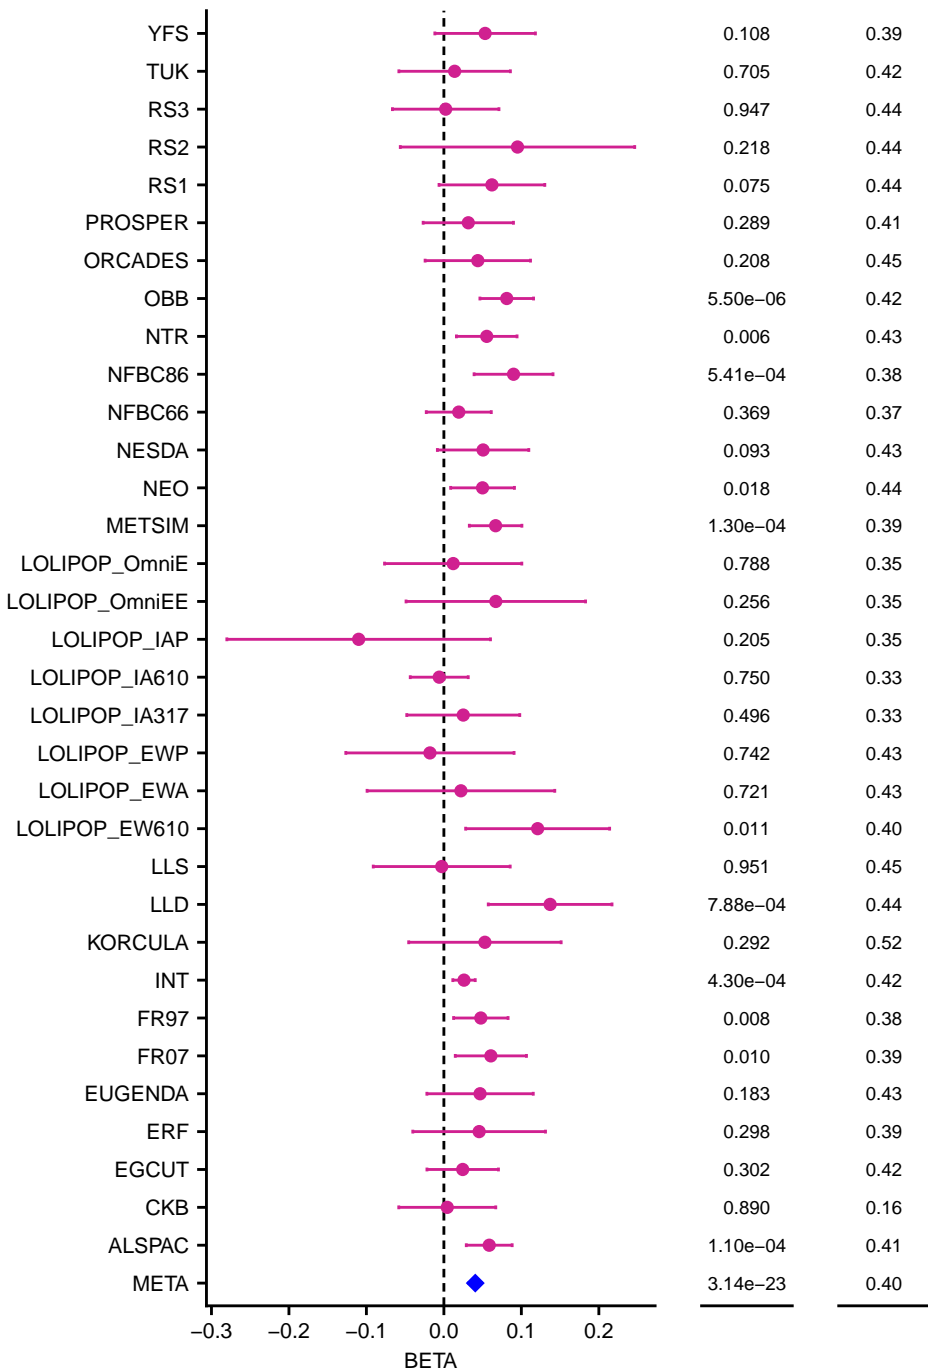

## chr5:41927423:A Acetone

P-value

EAF

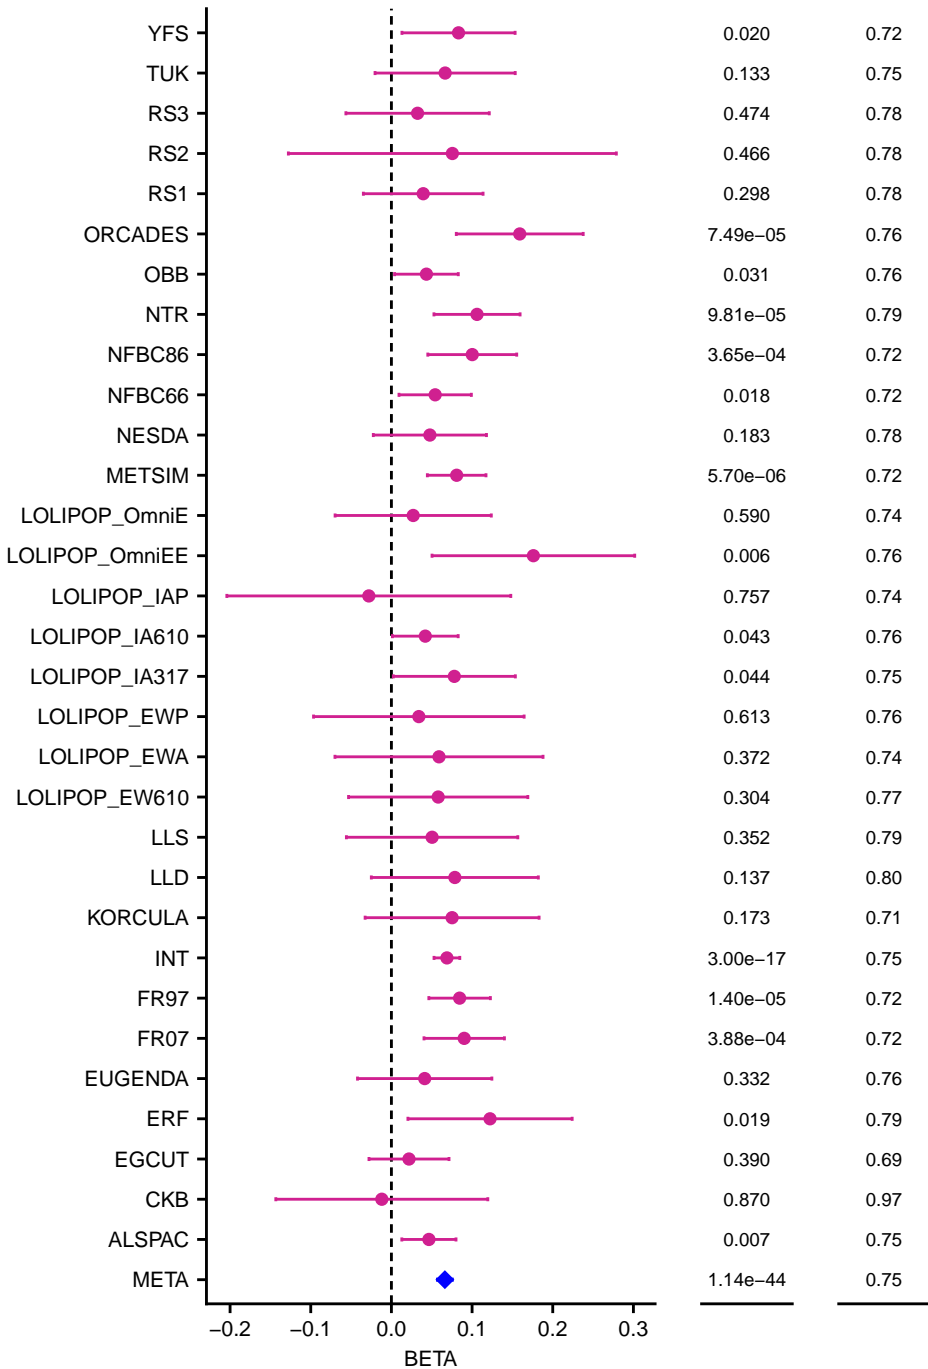



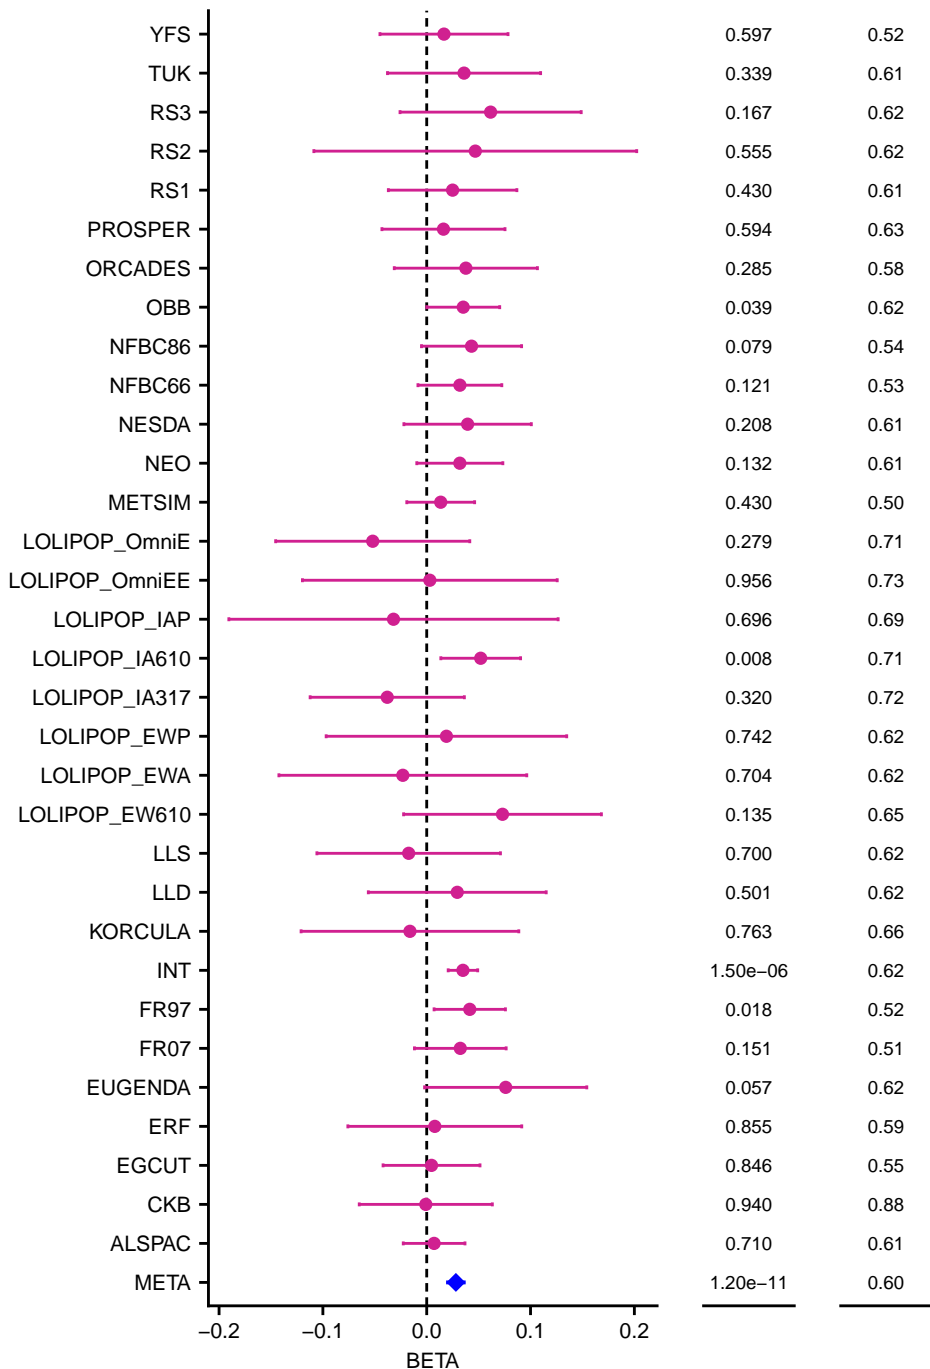

## chr5:55861894:A M-VLDL-TG

P-value

EAF

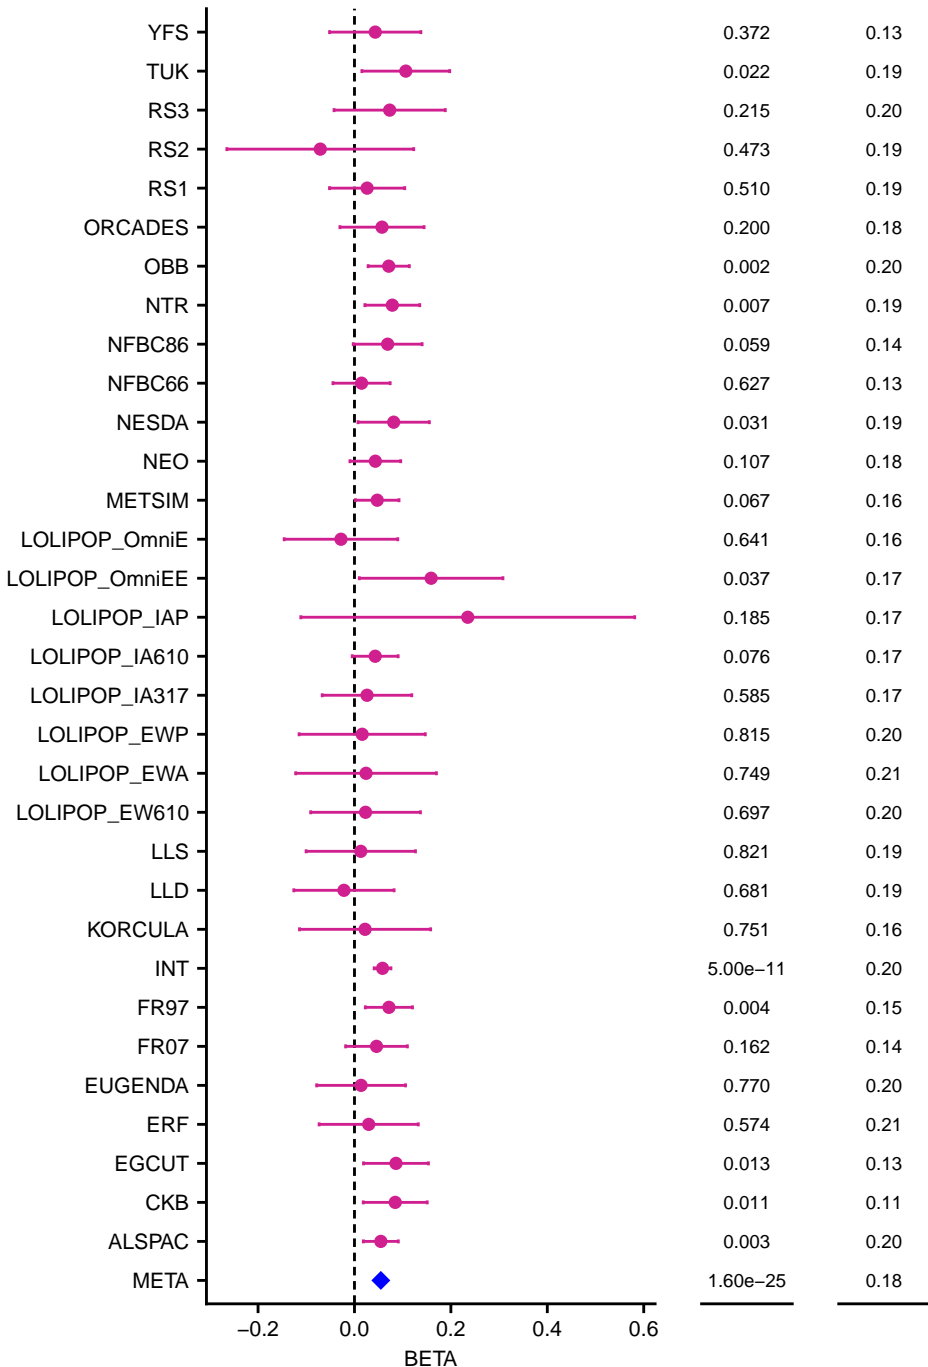

chr5:68047026:A Crea

P-value

EAF

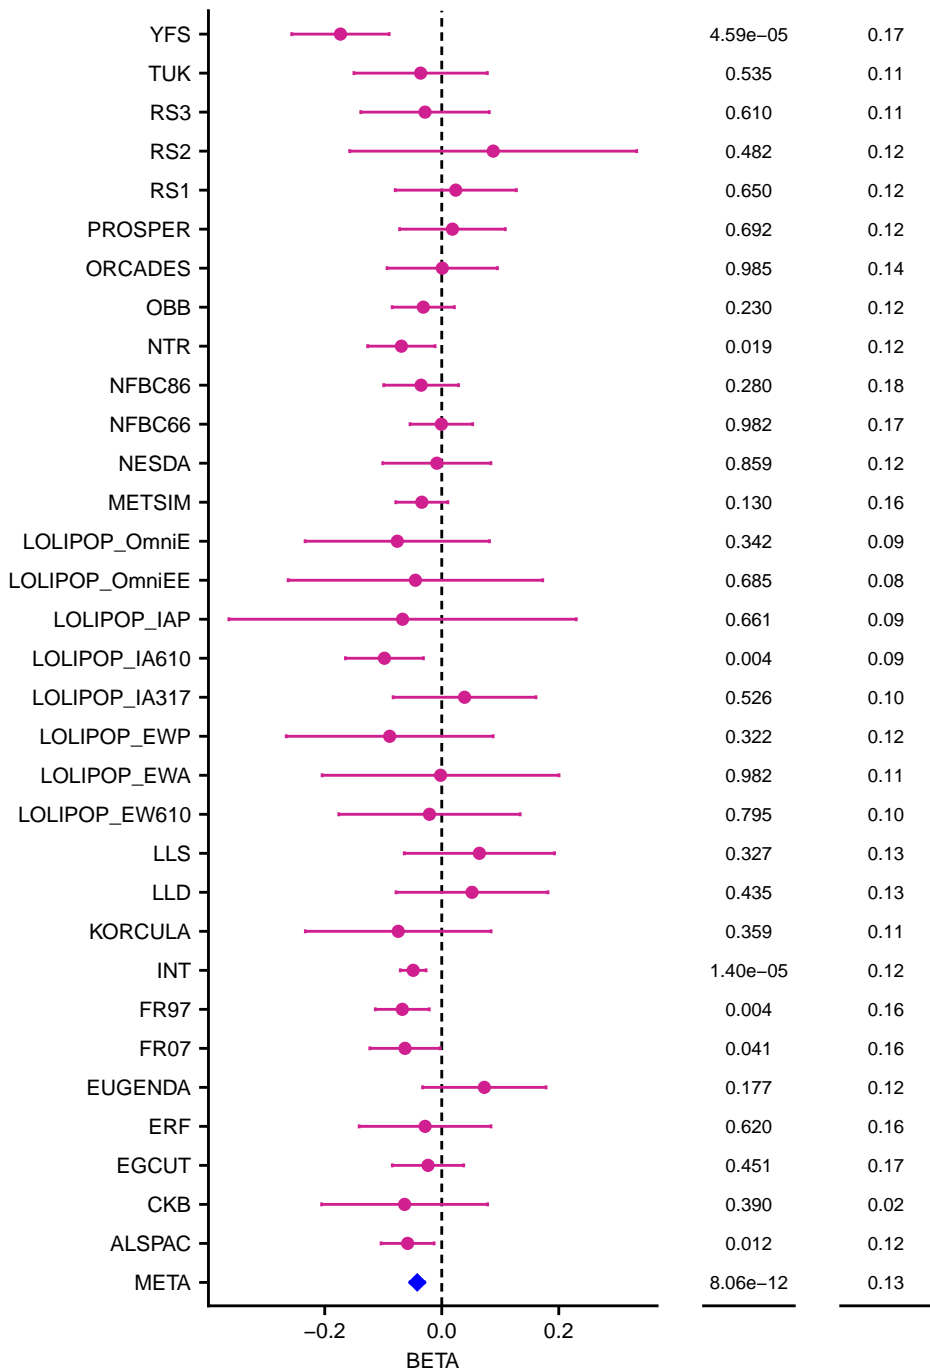

chr5:72351708:A XL-HDL-FC\_percent

P-value

EAF

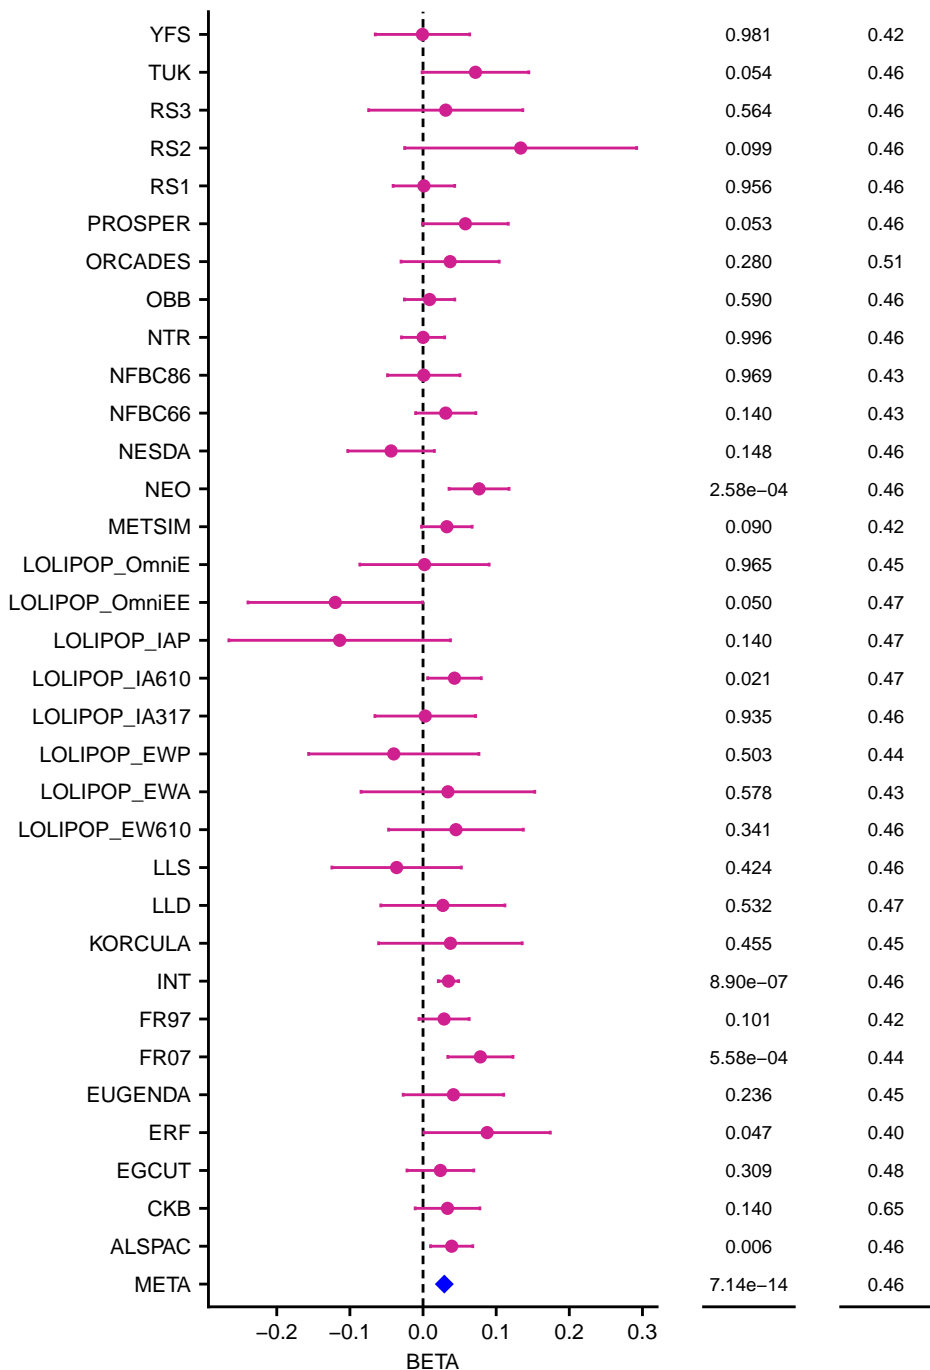

## chr5:74656539:T L-LDL-CE

P-value

EAF

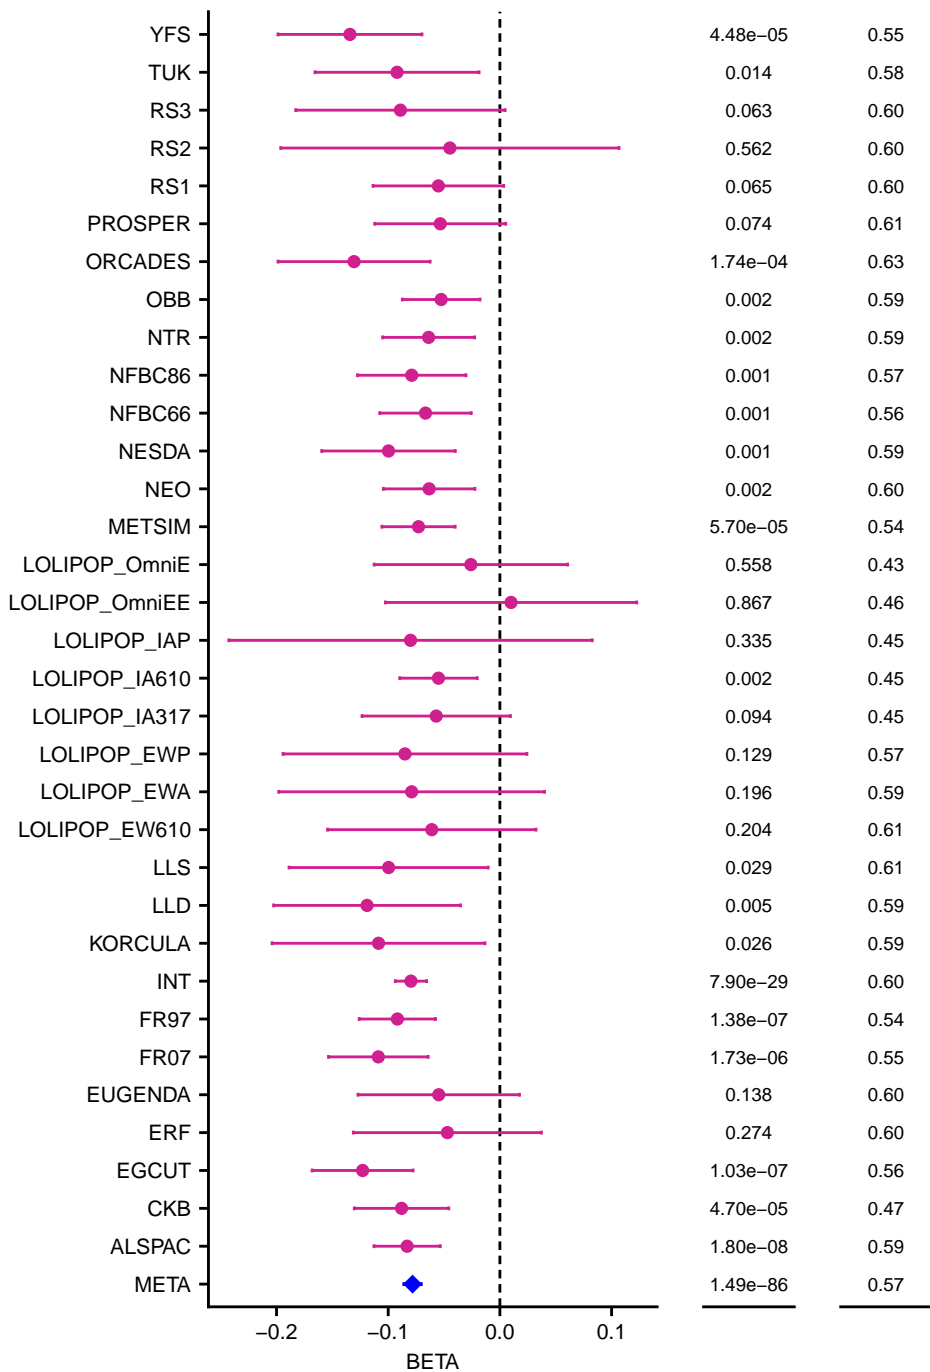

chr5:95539536:T Glc

P-value

EAF

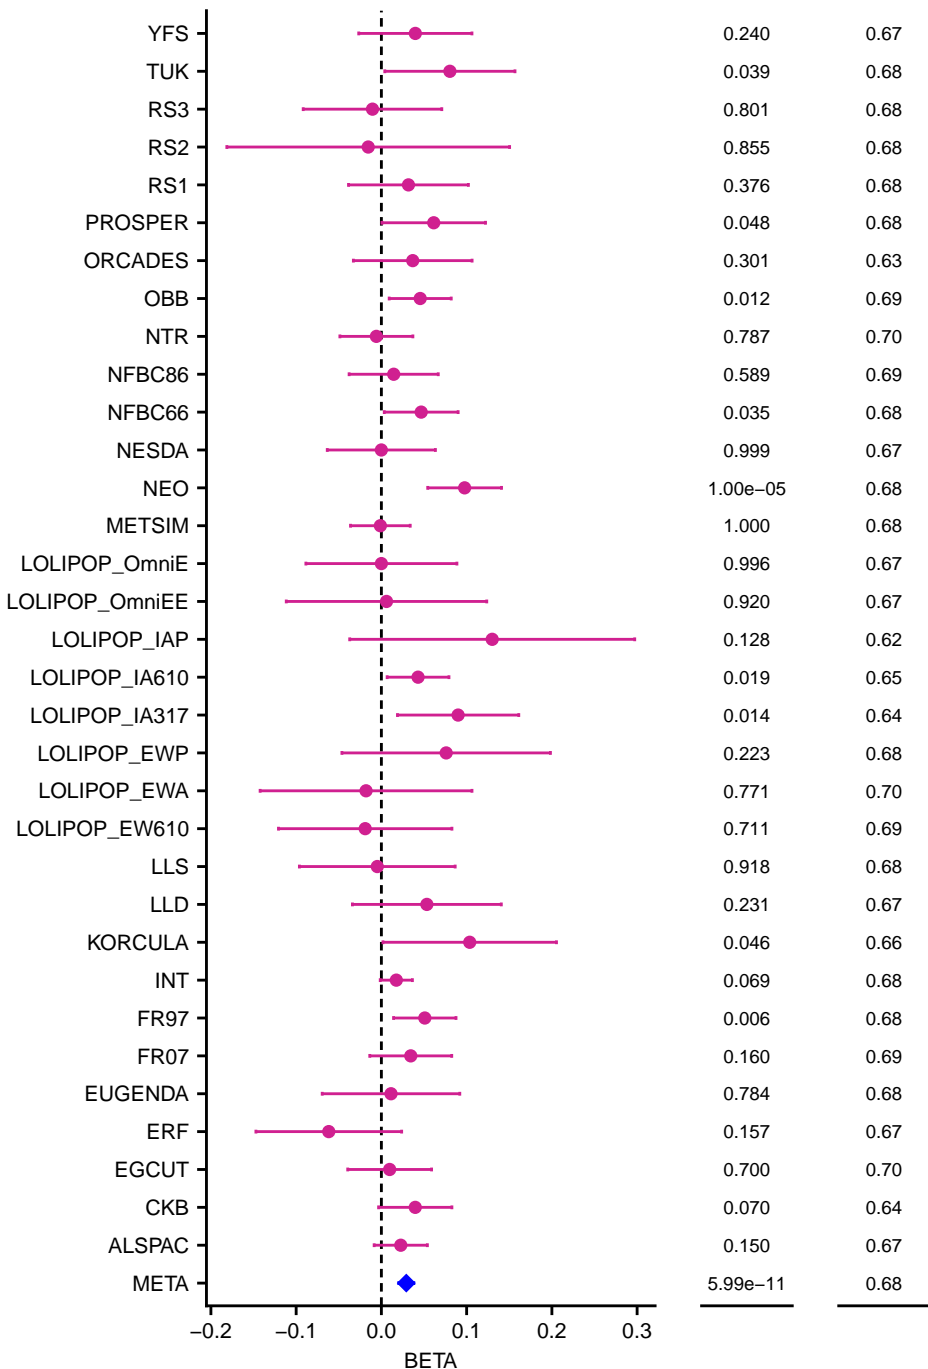

chr5:123053647:T L-LDL-C\_percent

P-value

EAF

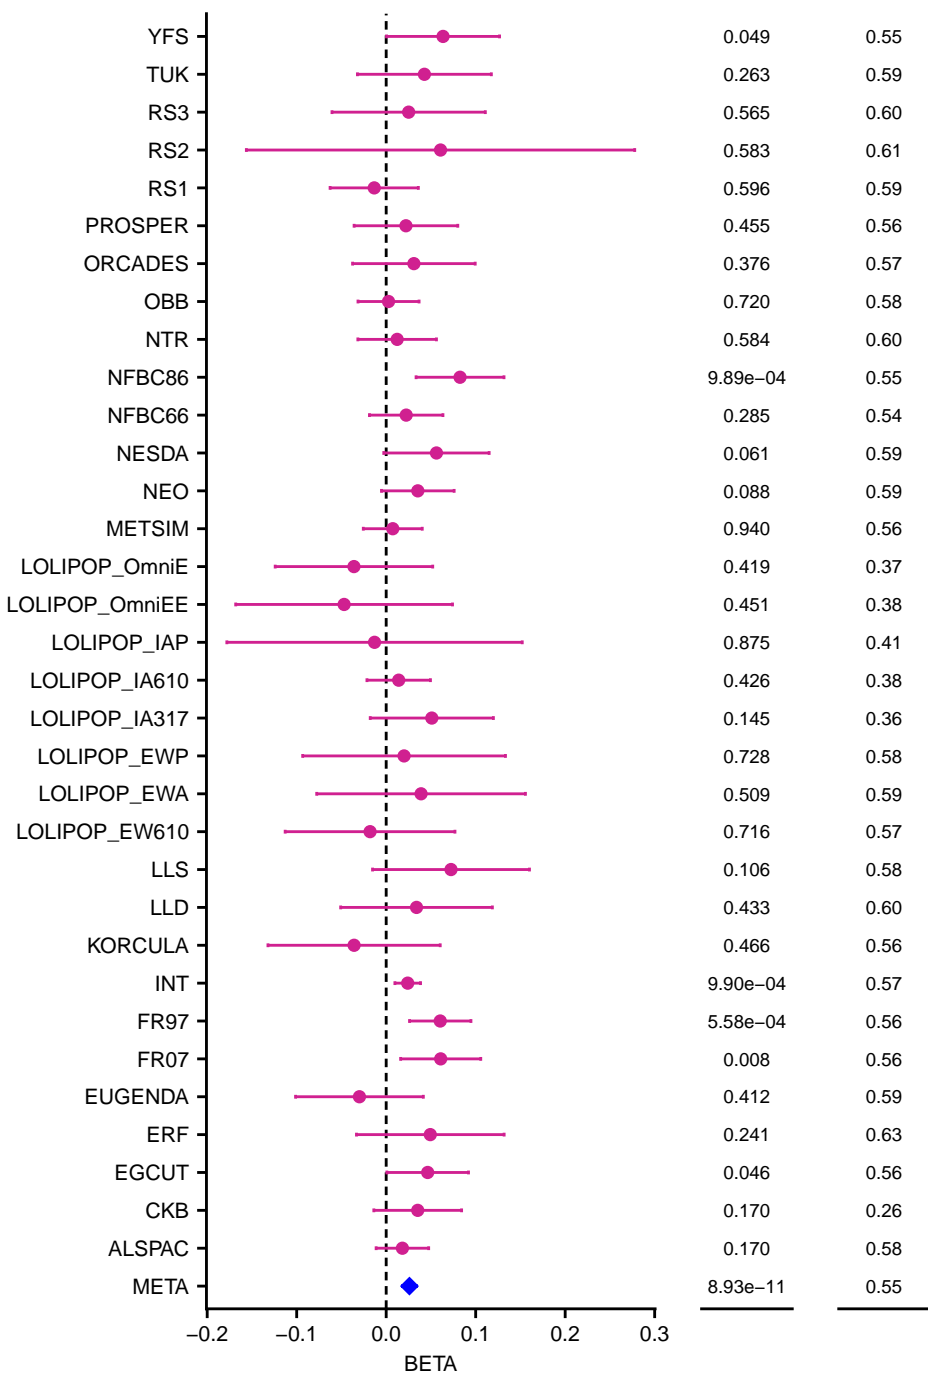

## chr5:131778716:A LDL-D

P-value

EAF

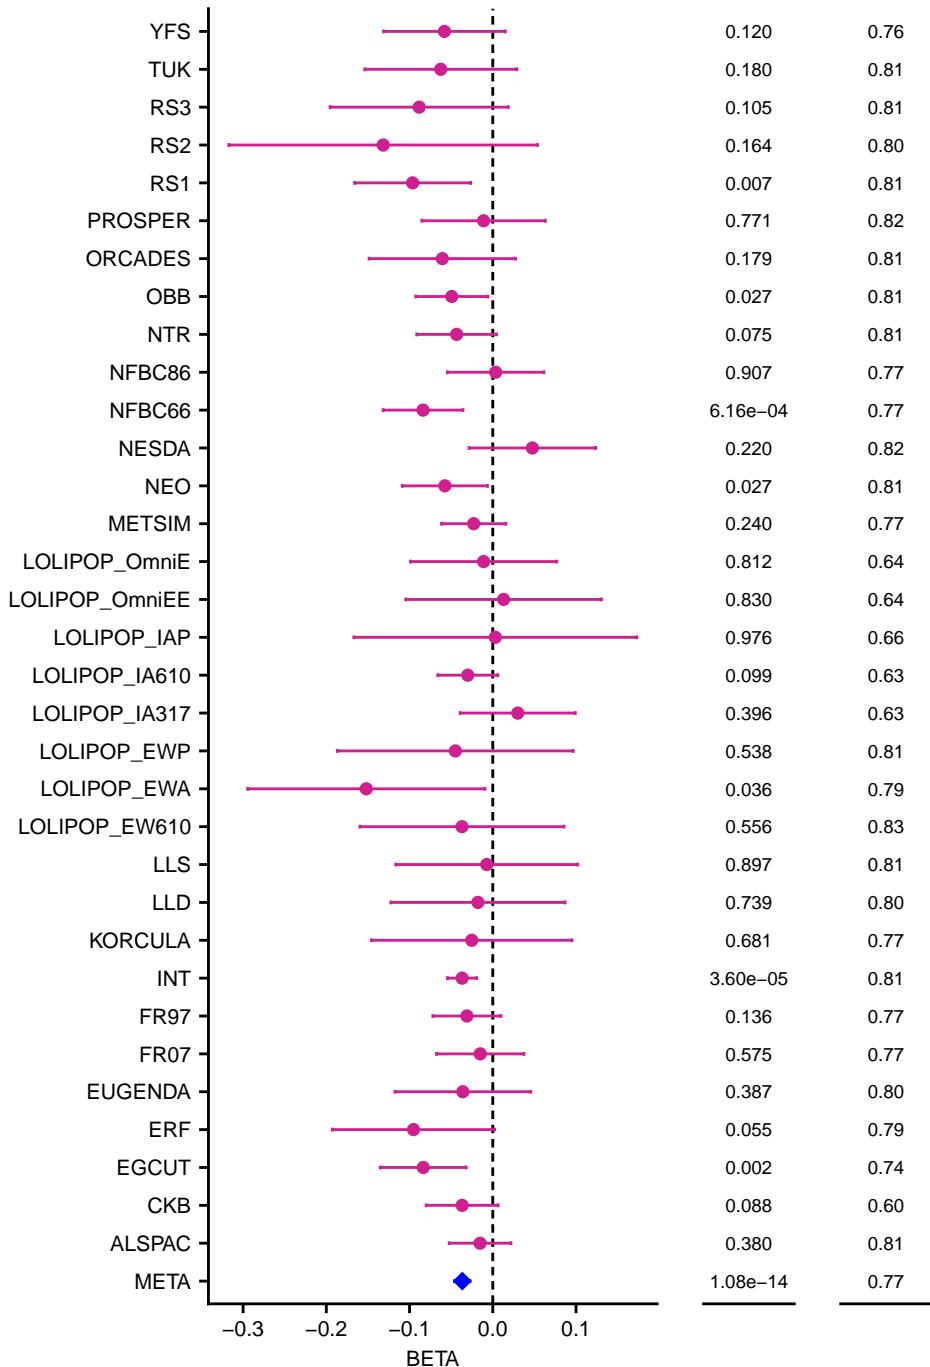



chr5:150692706:T Ala

P-value

EAF

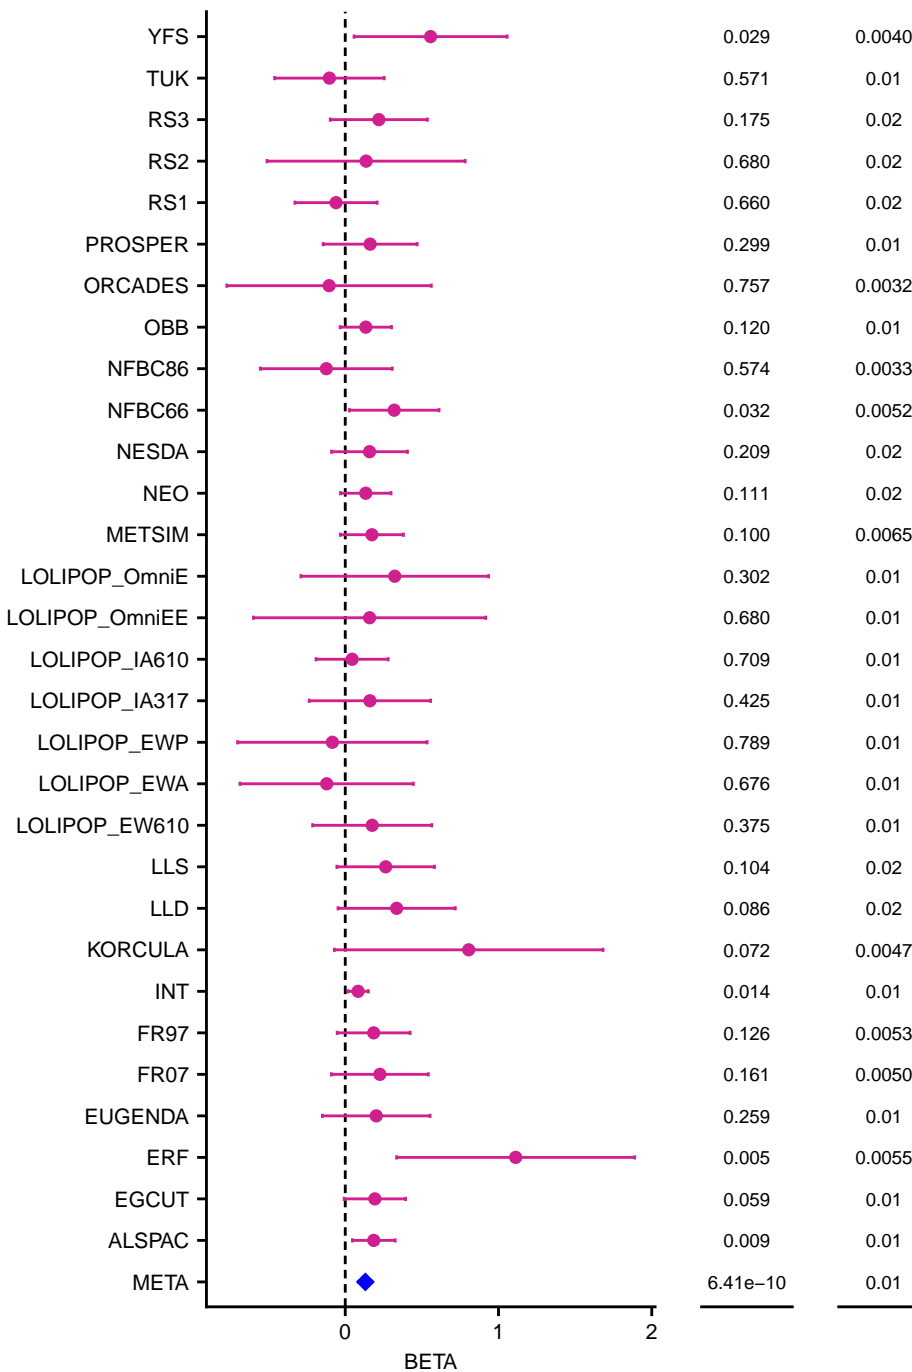

## chr5:156397673:A ApoB

P-value

EAF

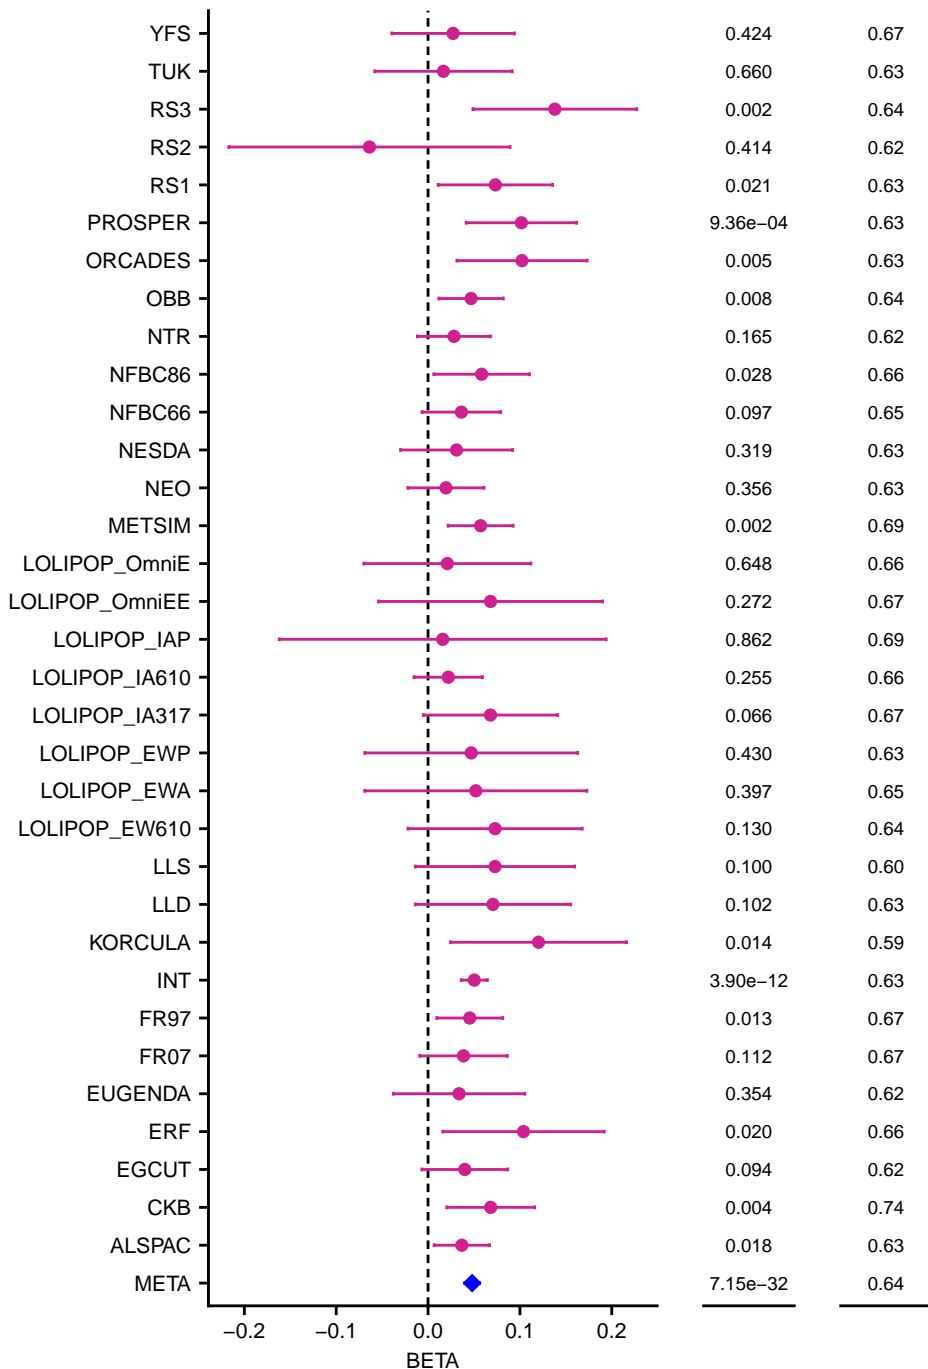

## chr5:157985730:C VLDL-D

P-value

EAF

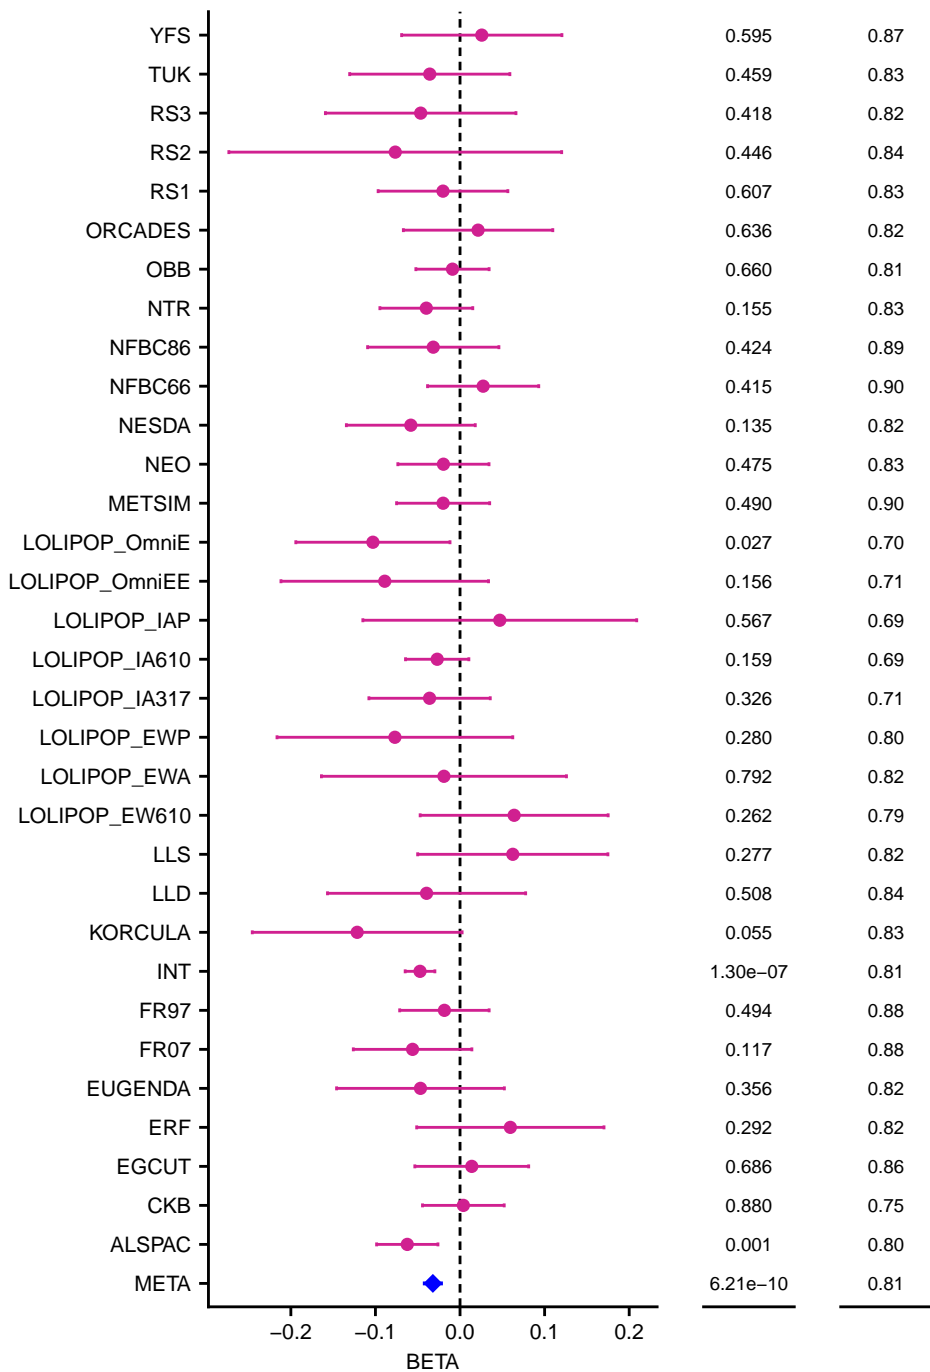

chr5:174948943:T Gln

P-value

EAF

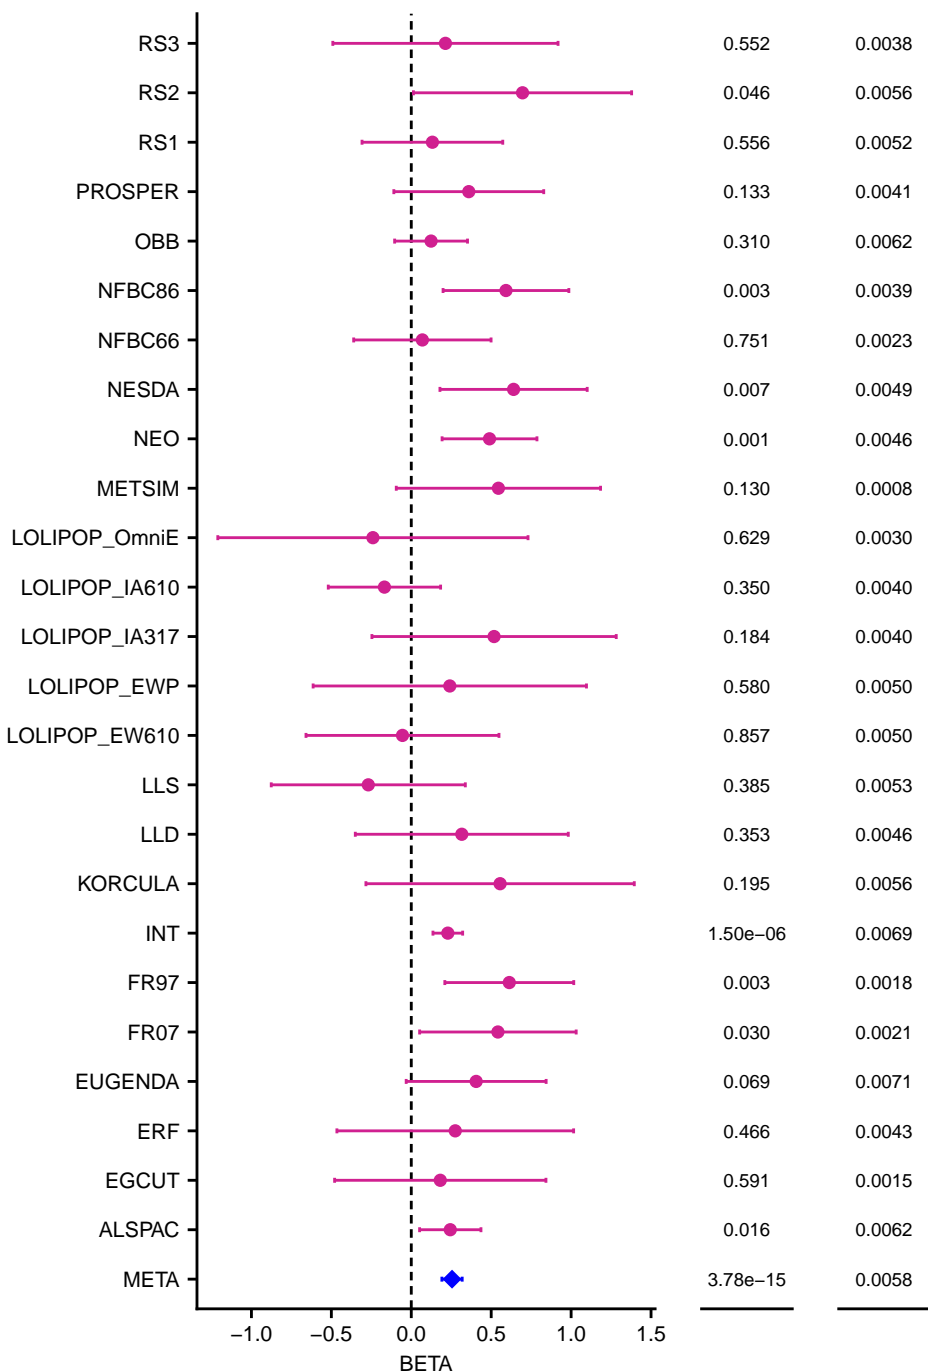

chr5:176841339:T Phe

P-value

EAF

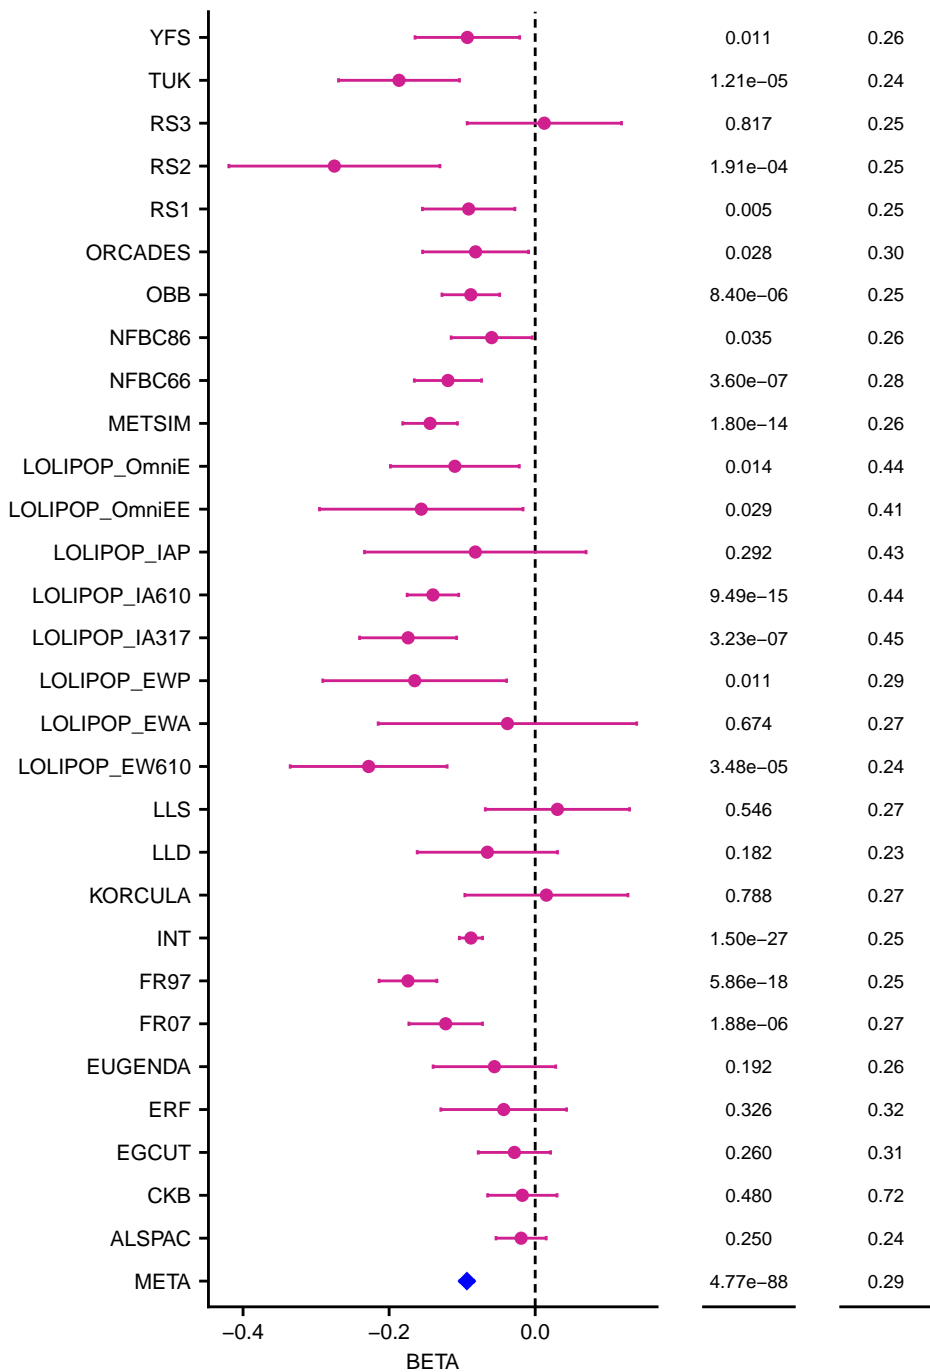

chr6:261343:T XL-HDL-FC\_percent

P-value

EAF

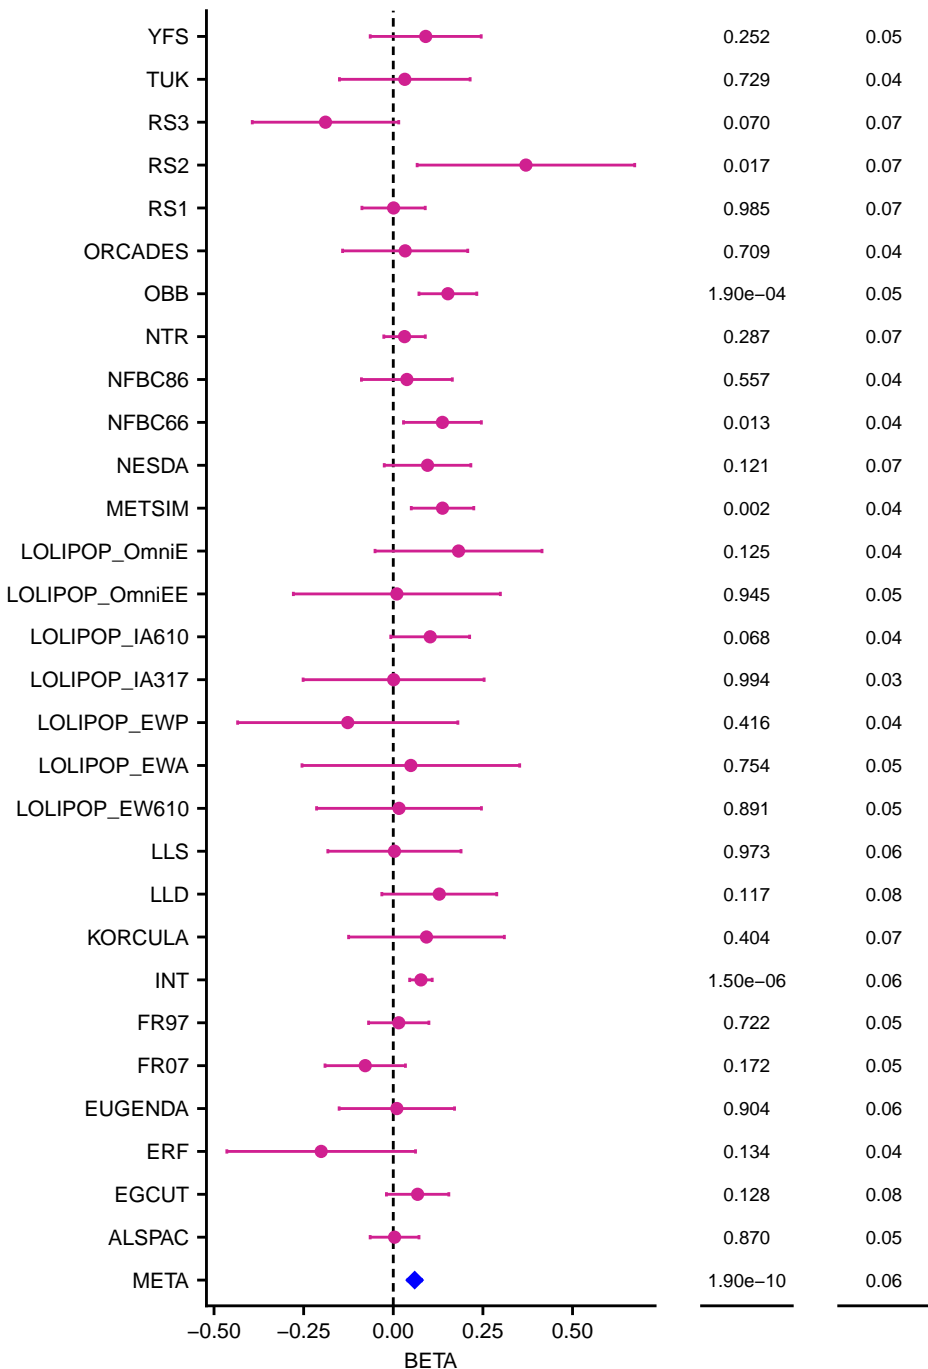

## chr6:7119134:A Crea

P-value

EAF

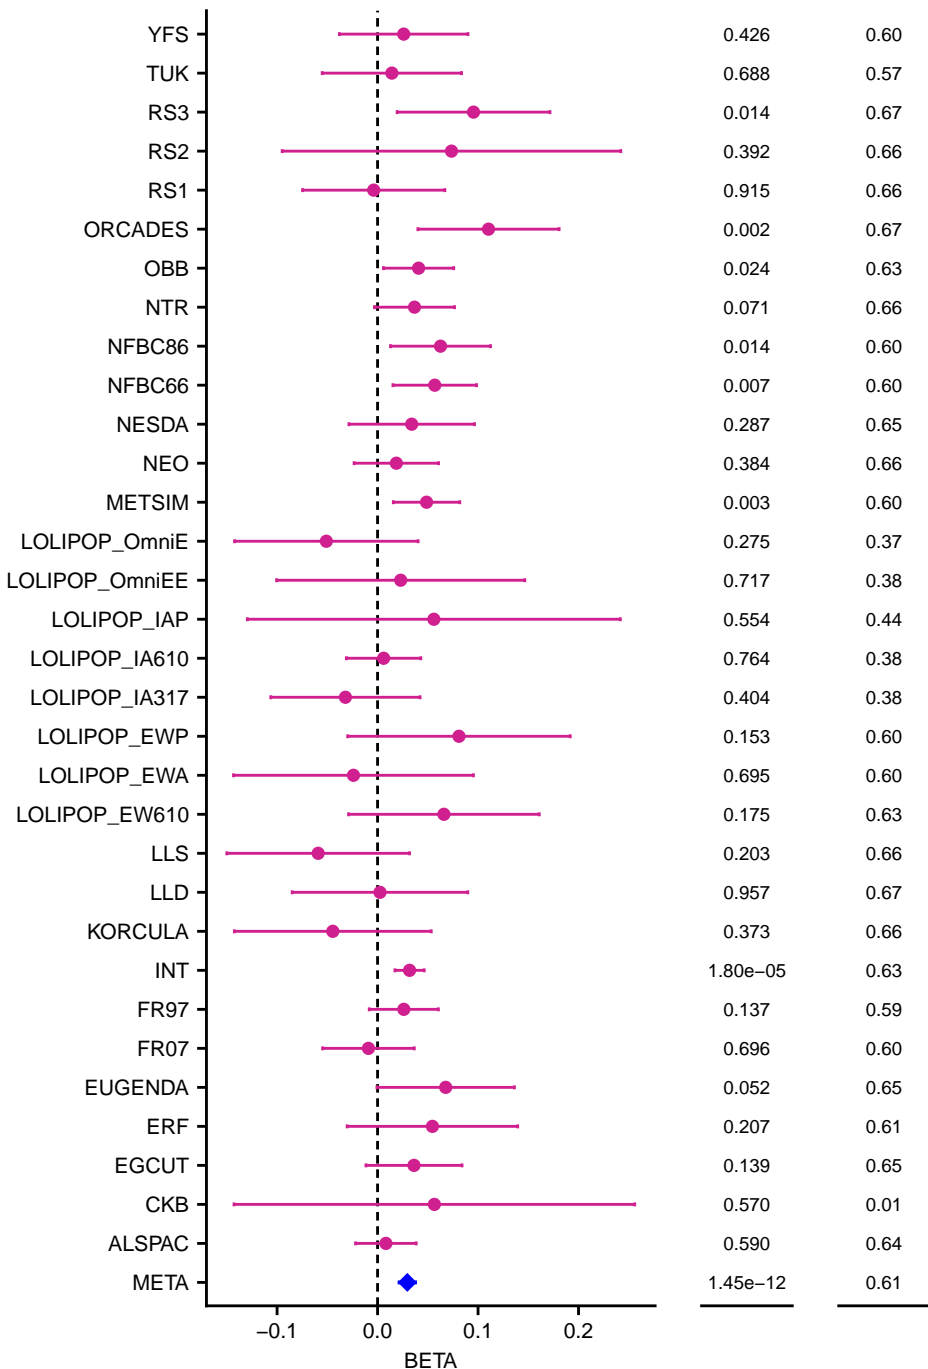

## chr6:11050803:C DHAbYFA

P-value

EAF

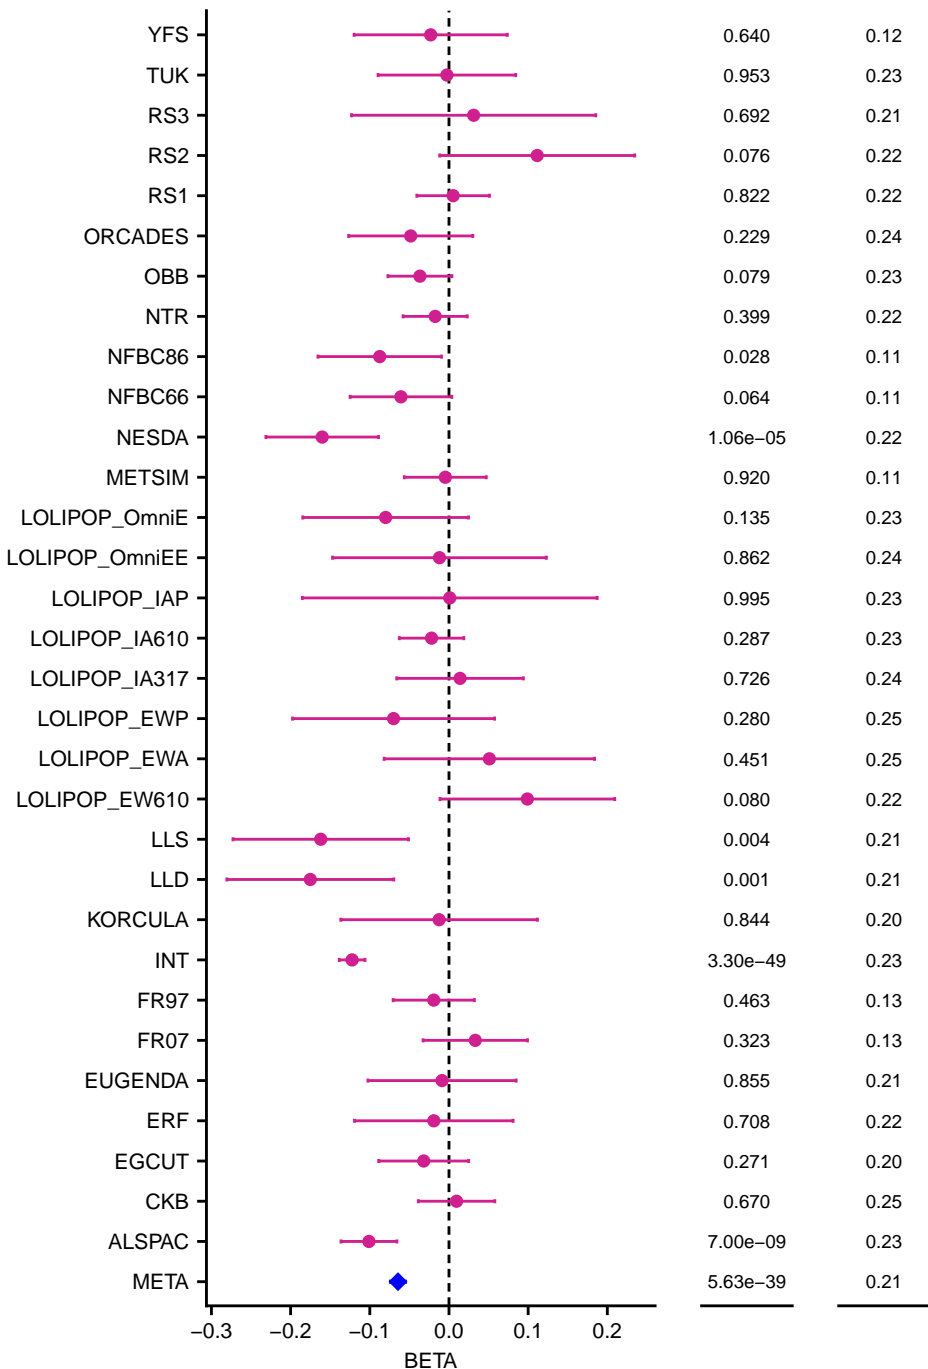



## chr6:16113321:A L-LDL-PL\_percent

P-value

EAF

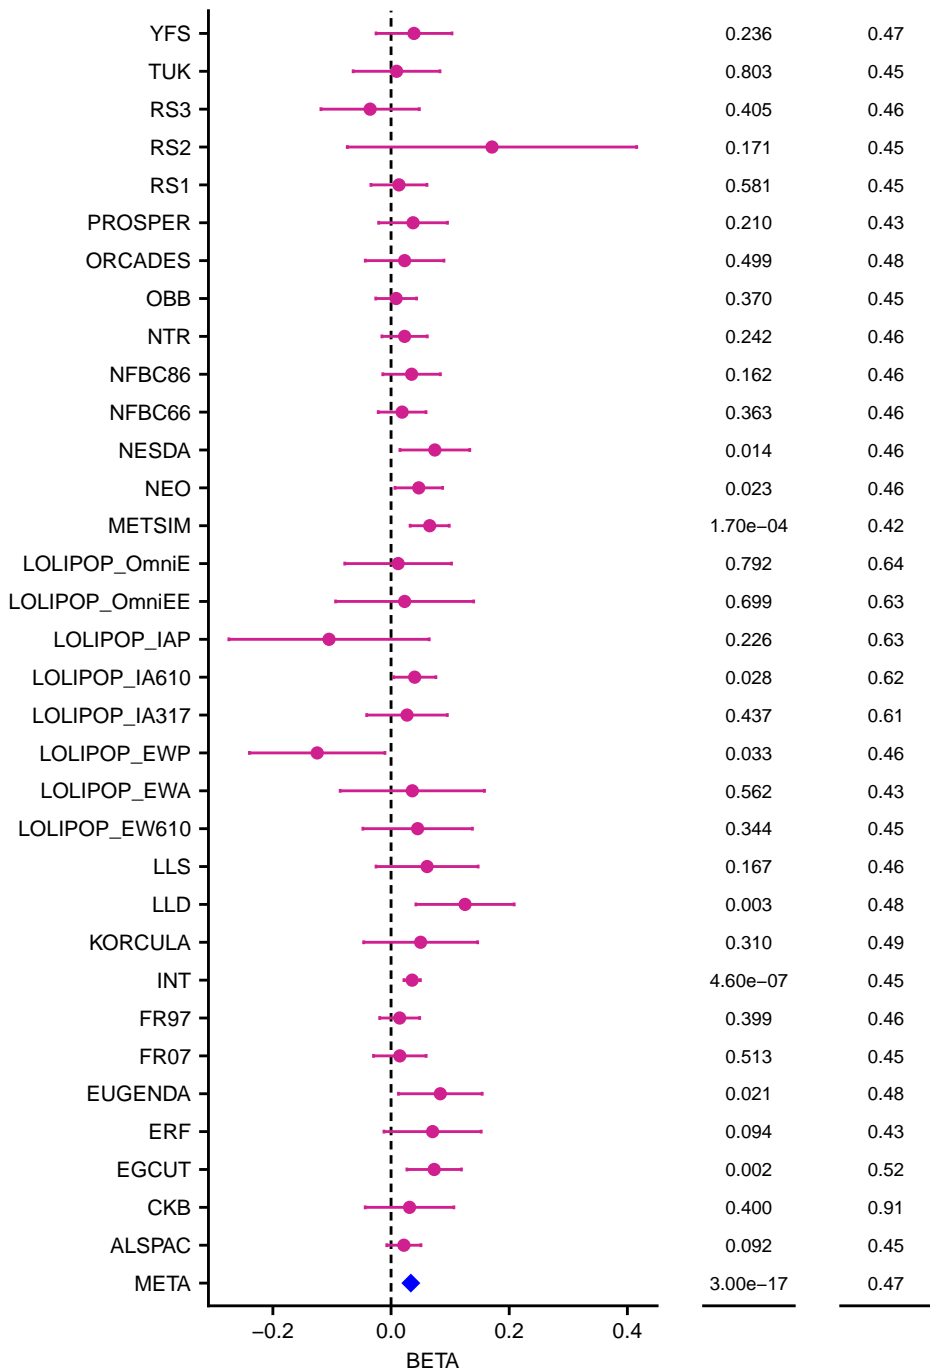

chr6:20694228:T Ala

P-value

EAF

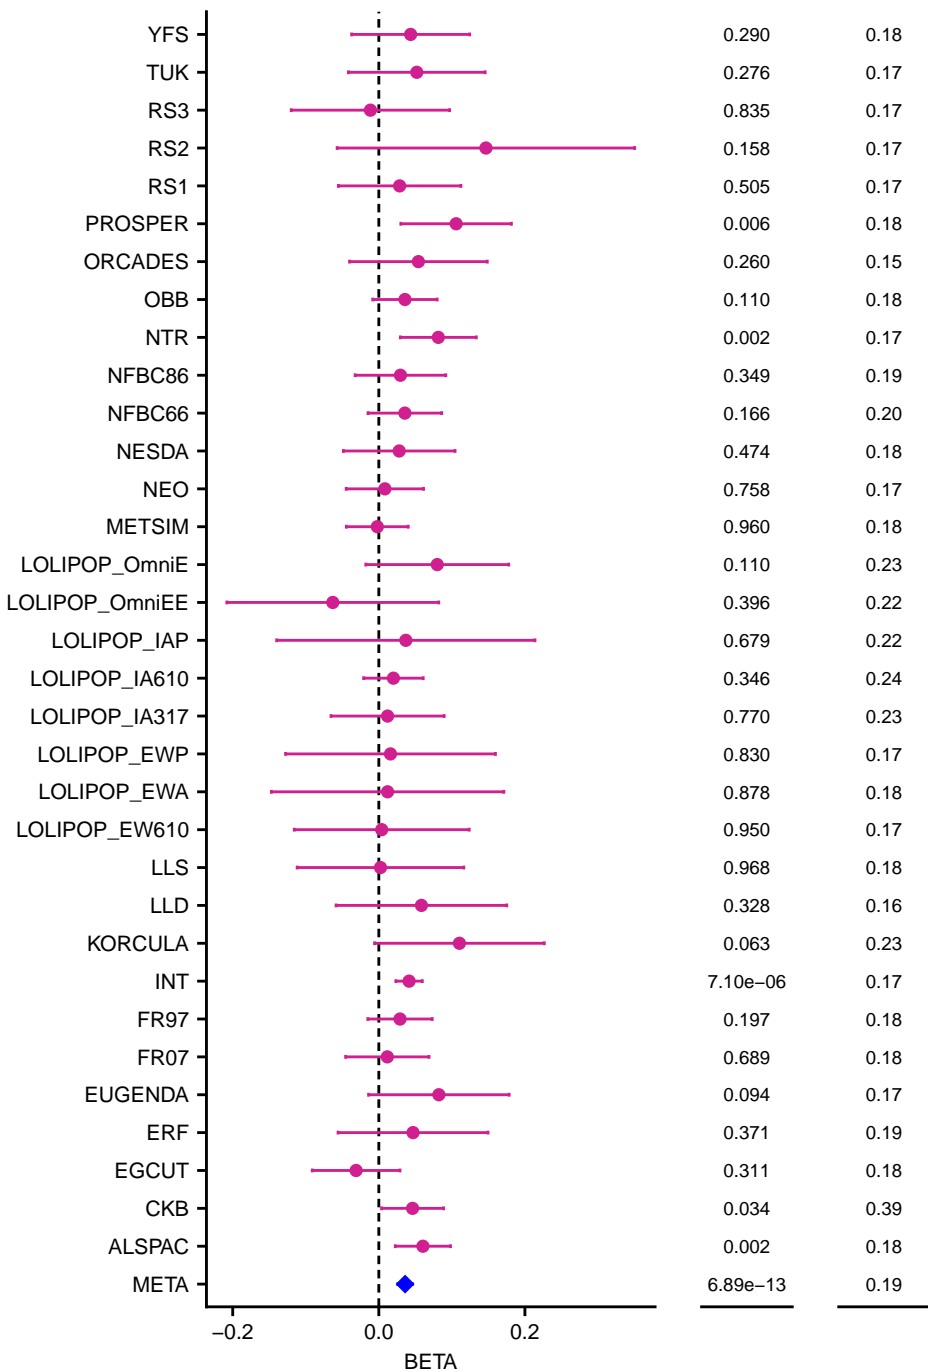

## chr6:32136547:T SFABYFA

P-value

EAF

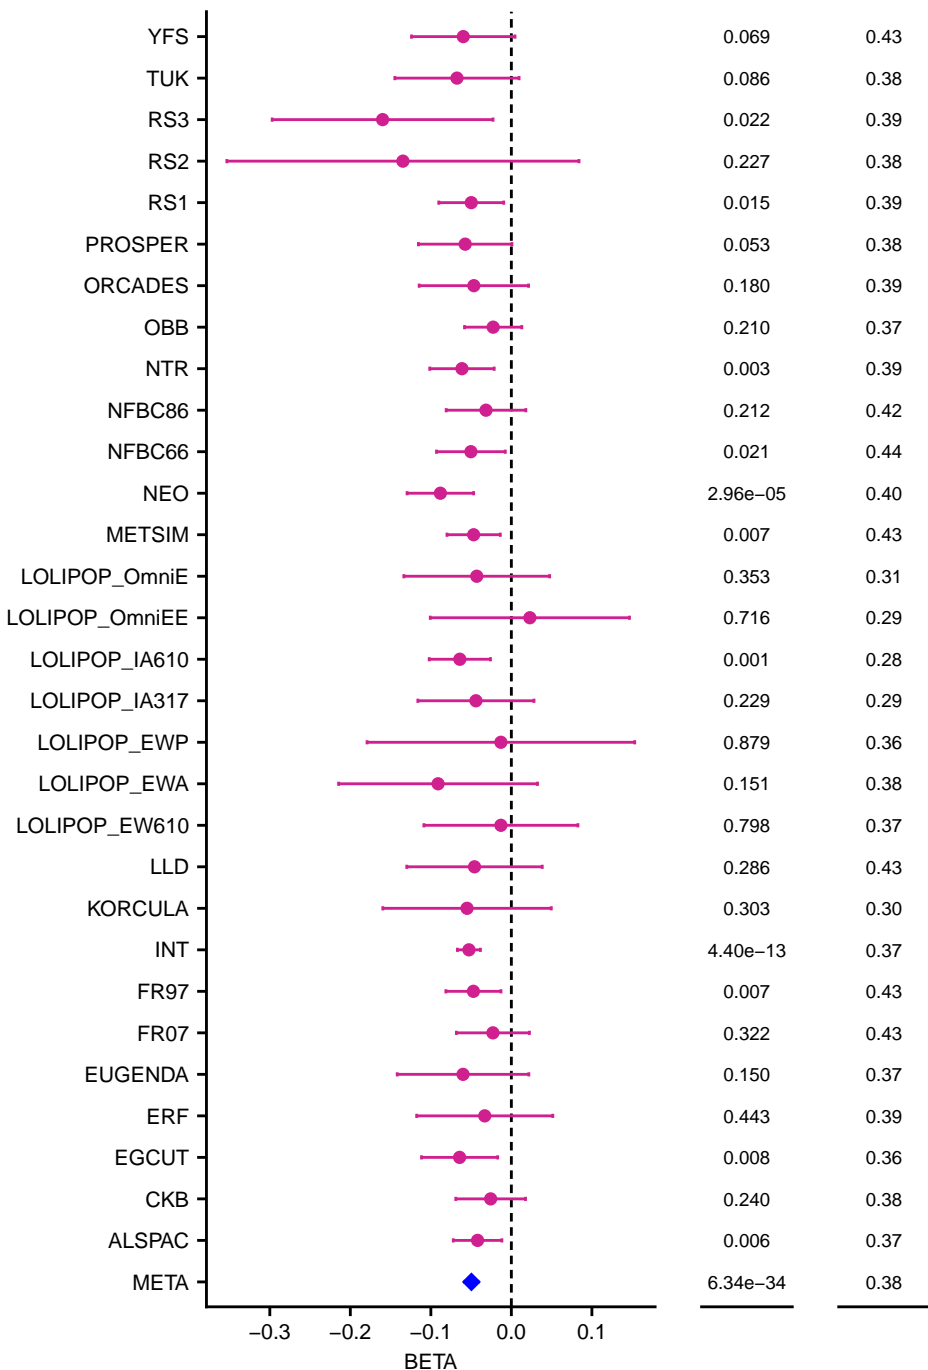

## chr6:34592090:A ApoA1

P-value

EAF

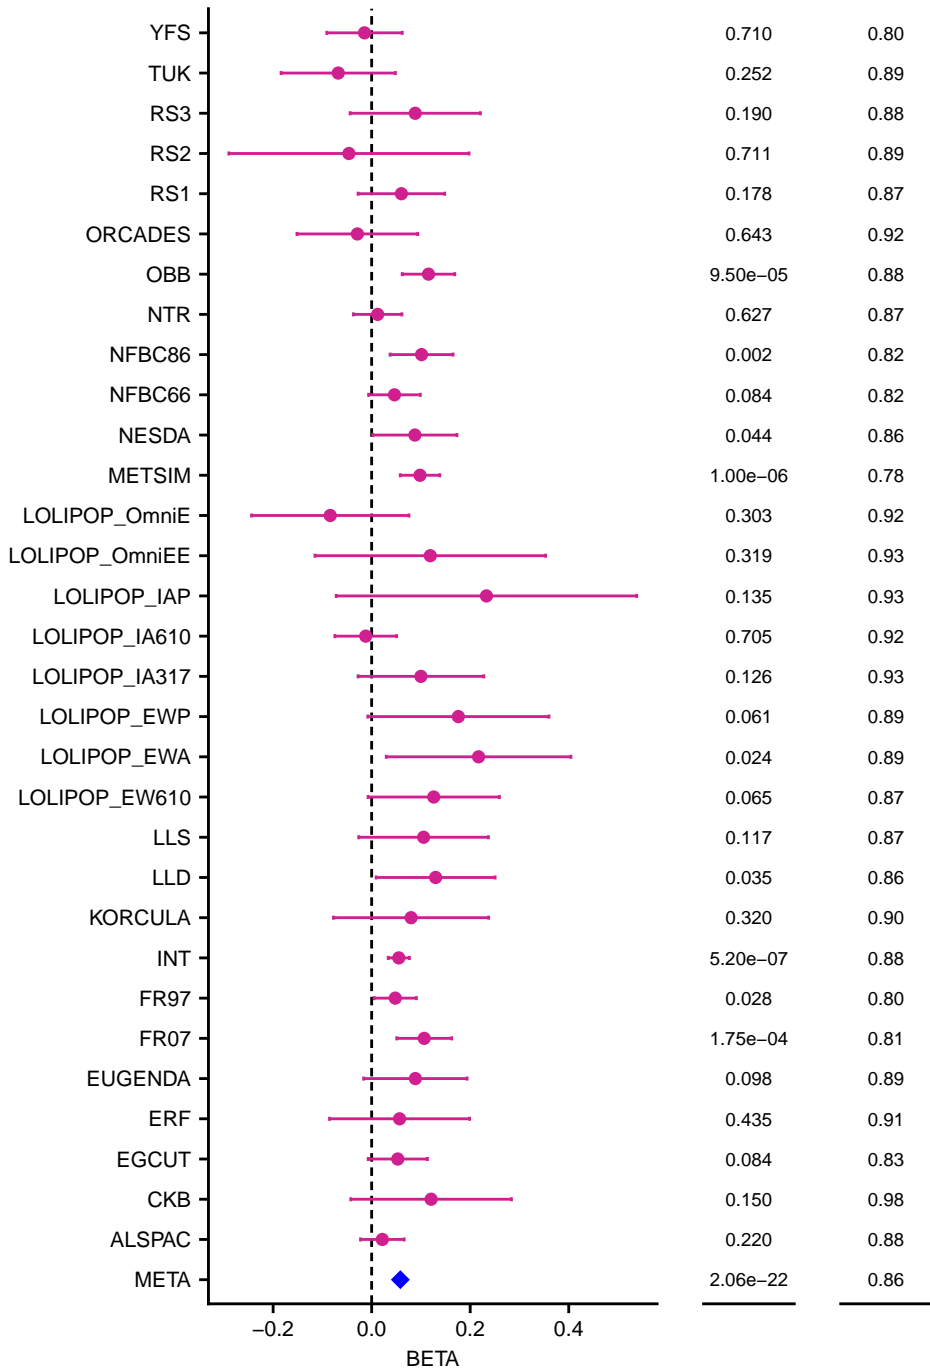

chr6:39284184:A Gln

P-value

EAF

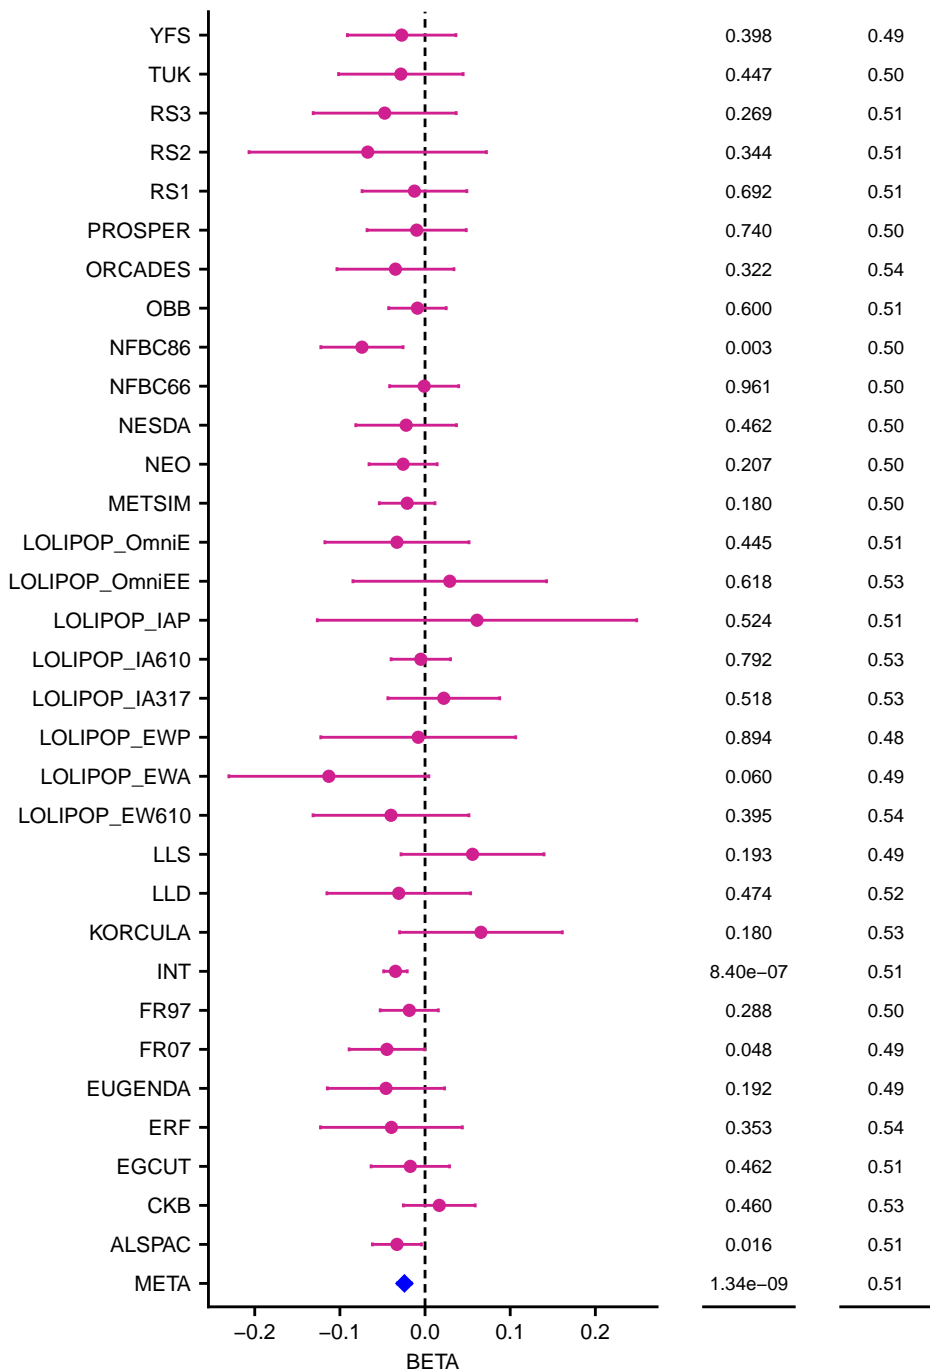

chr6:43757896:A XL-HDL-CE\_percent

P-value

EAF

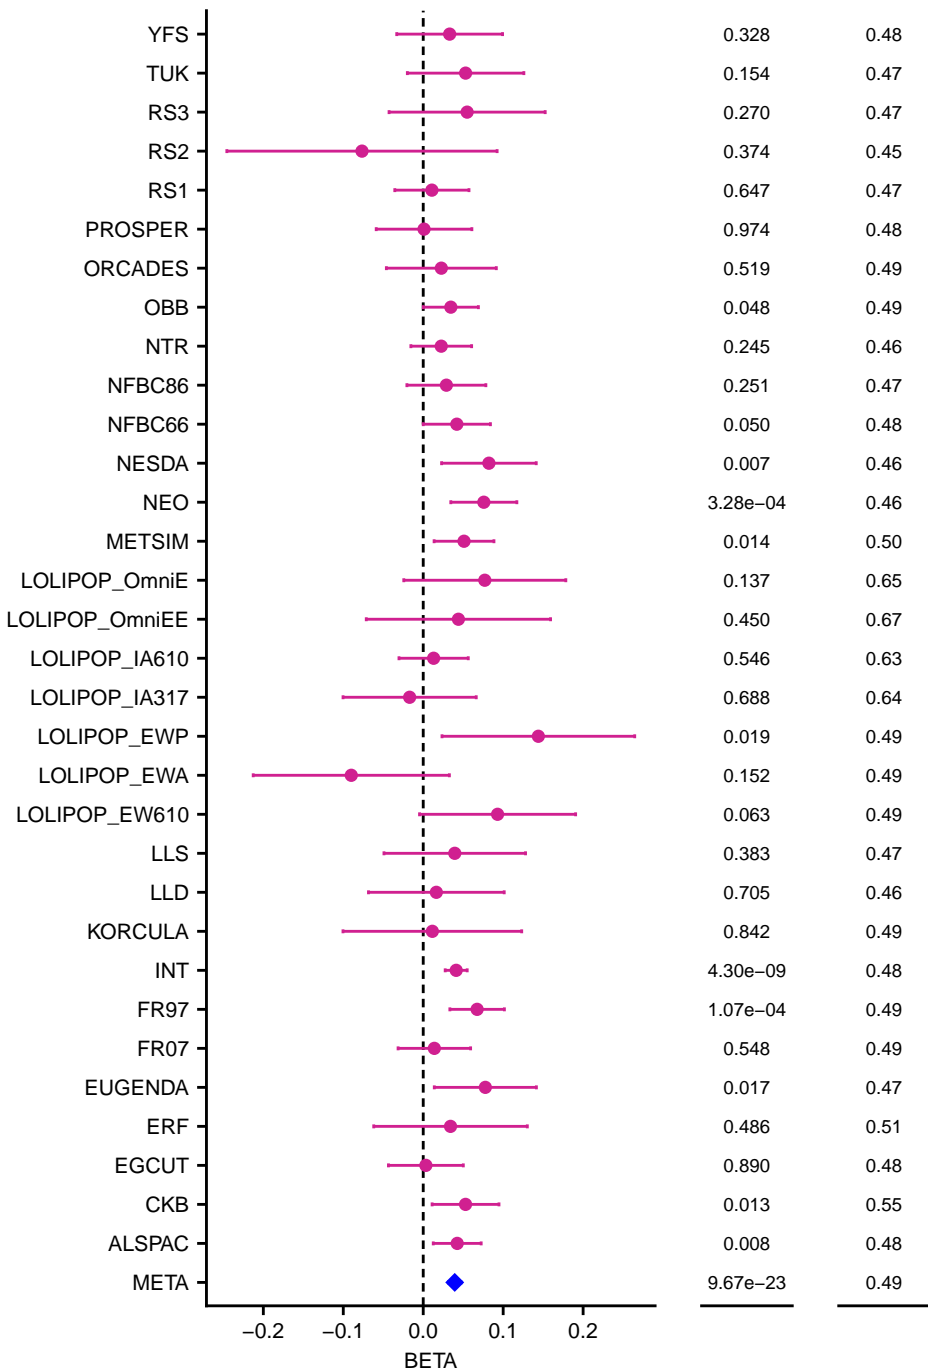

chr6:52713999:A Phe

P-value

EAF

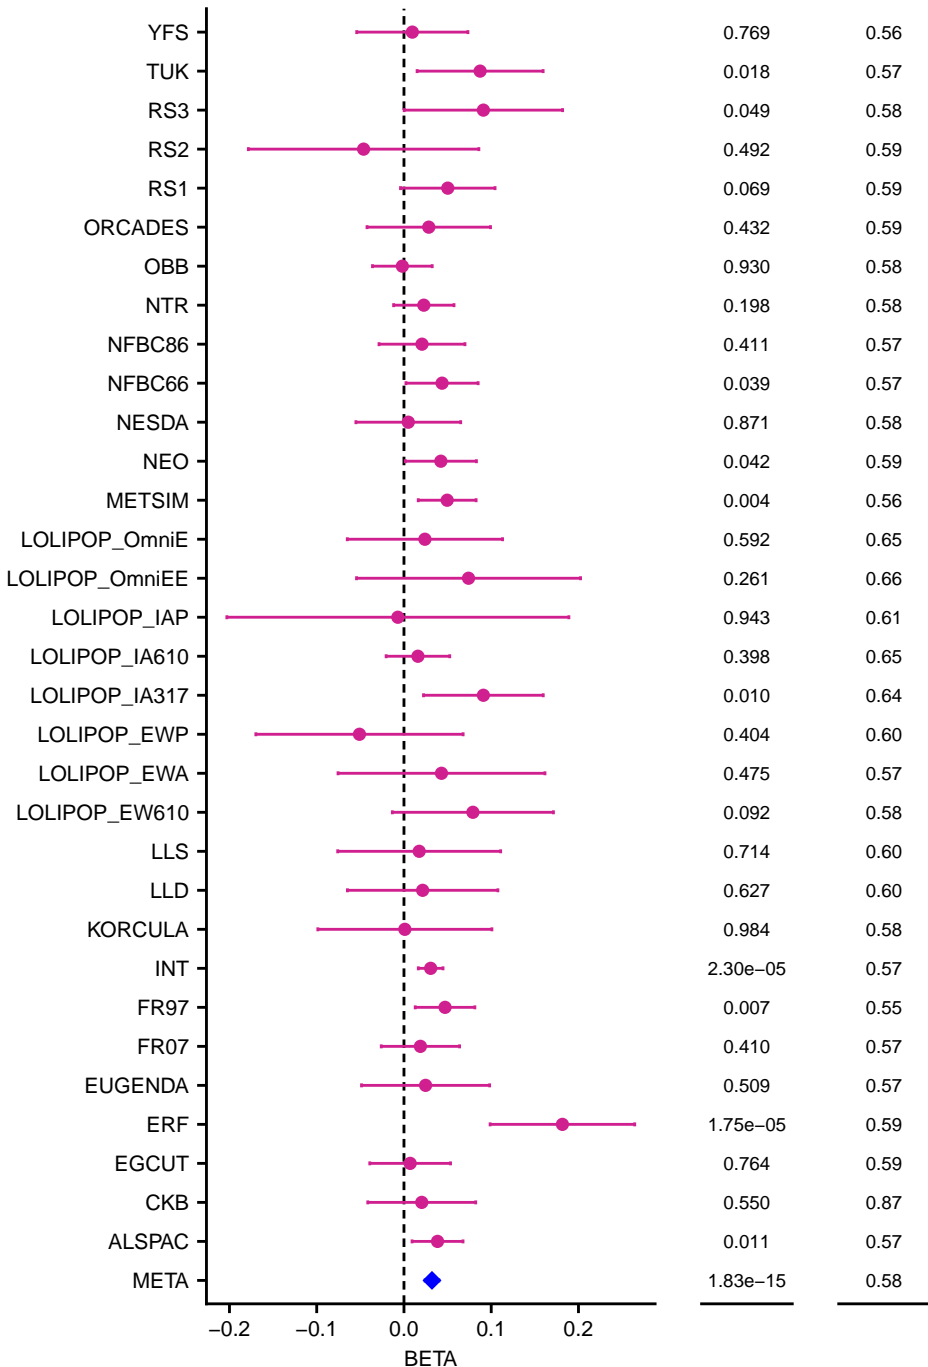

## chr6:90967337:A TotFA

P-value

EAF

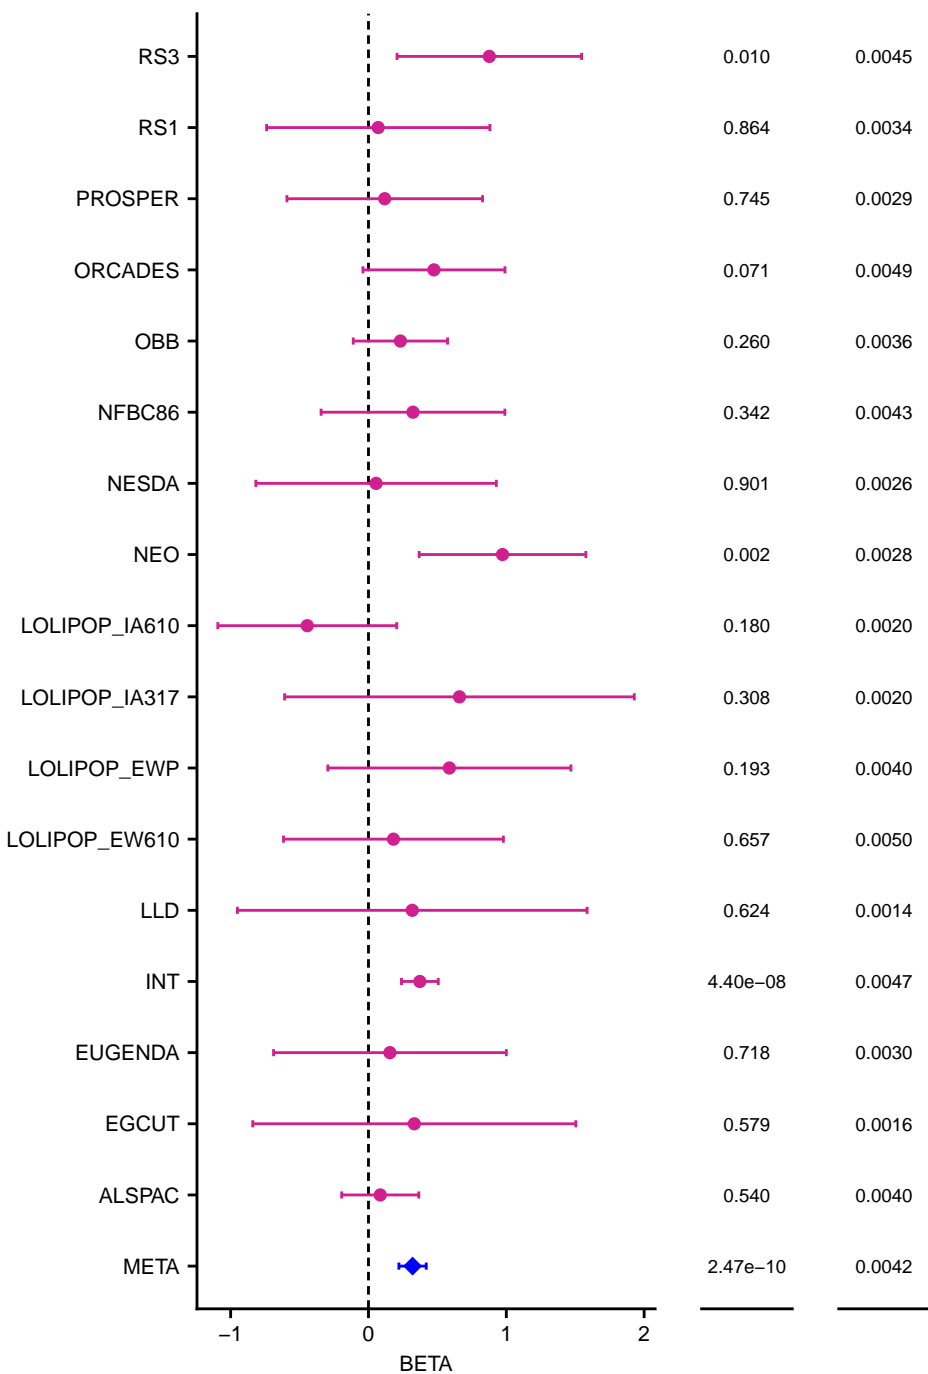



chr6:100600097:T L-LDL-PL\_percent

P-value

EAF

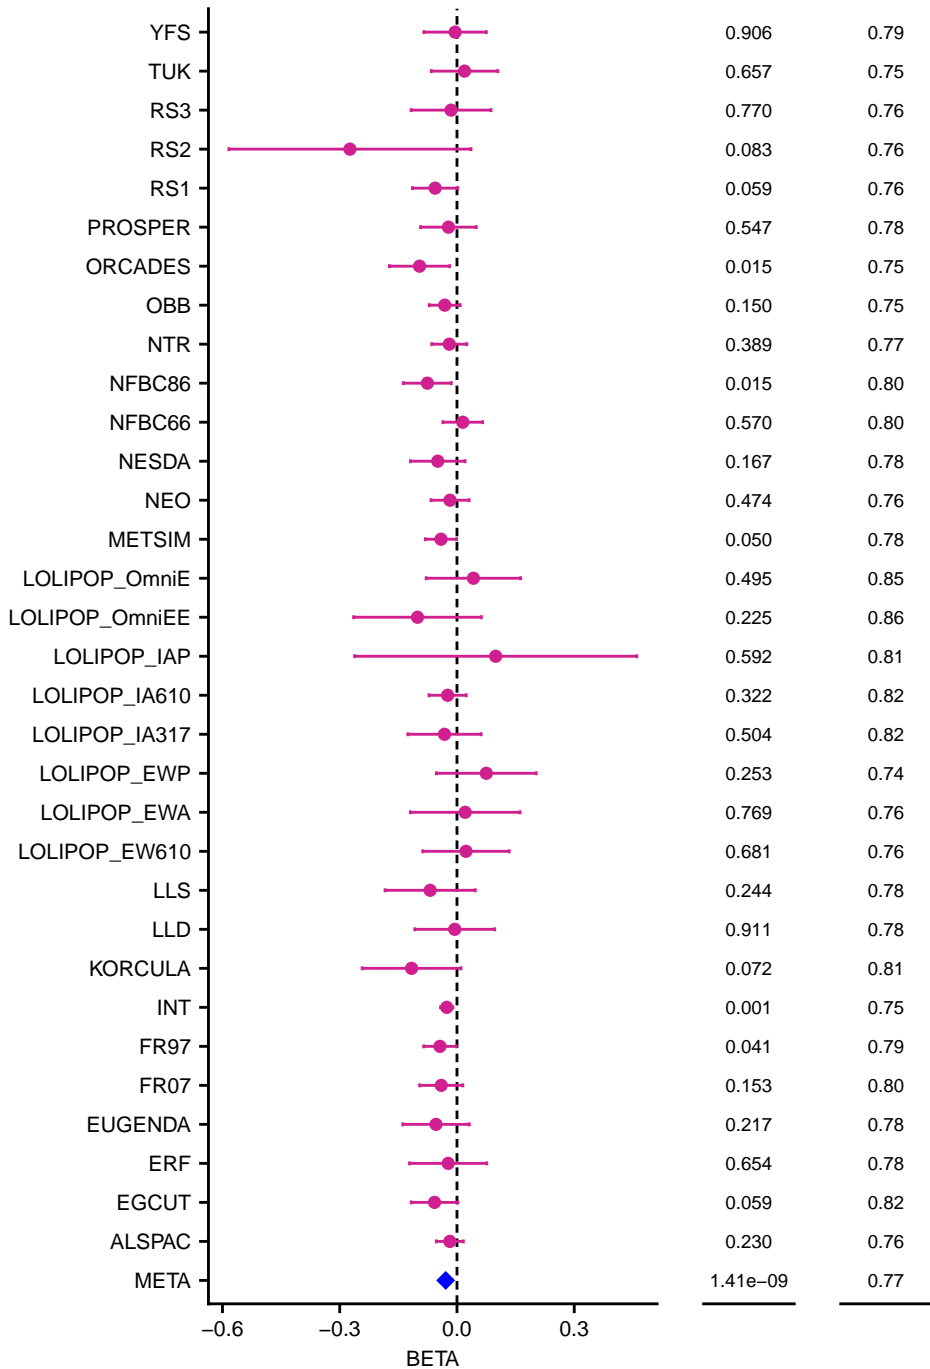

chr6:111556834:T Tyr

P-value

EAF

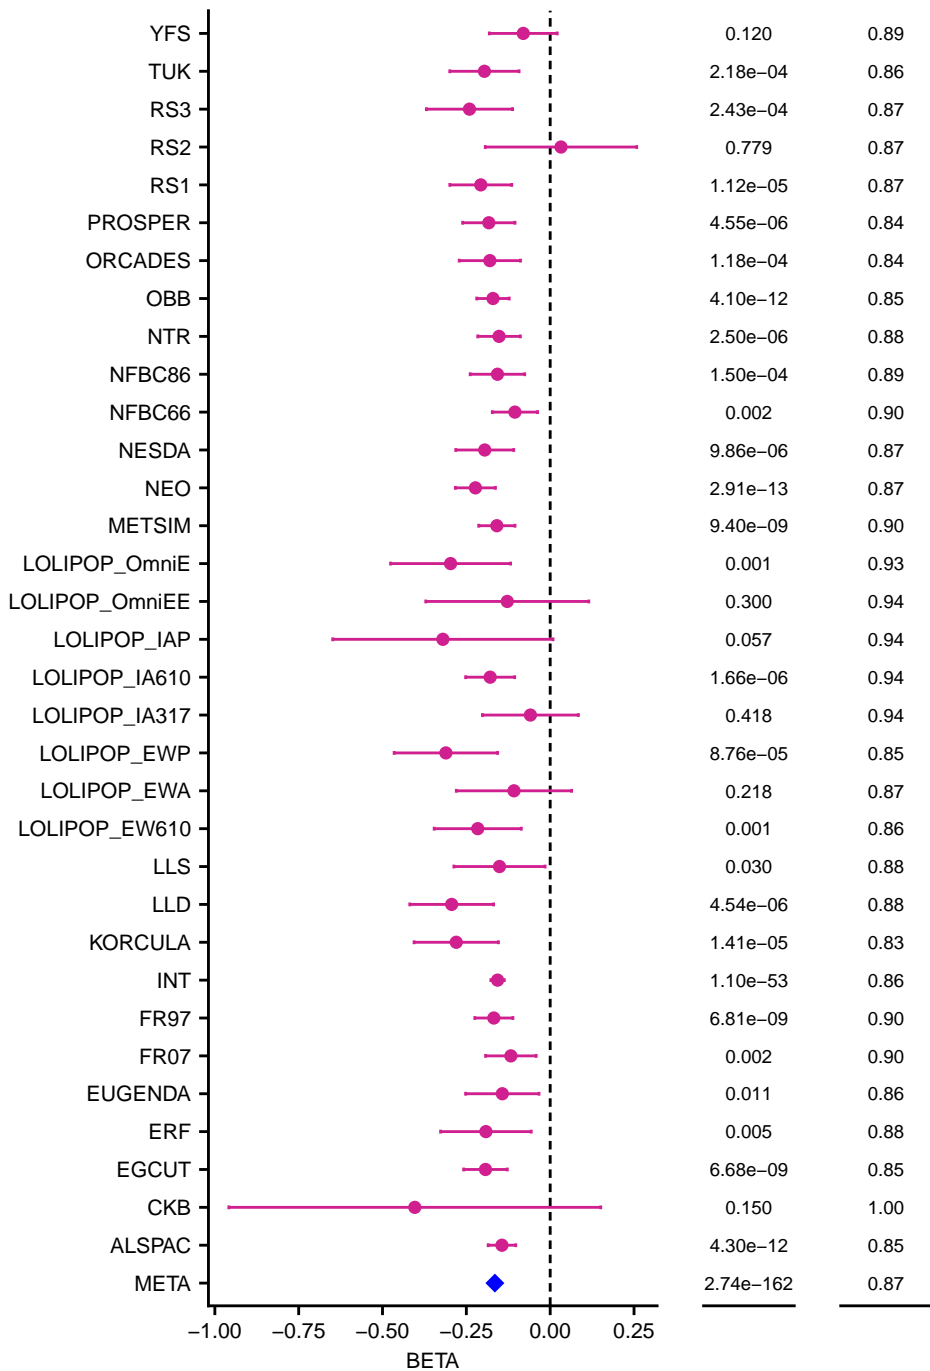

chr6:116309649:T FAW6

P-value

EAF

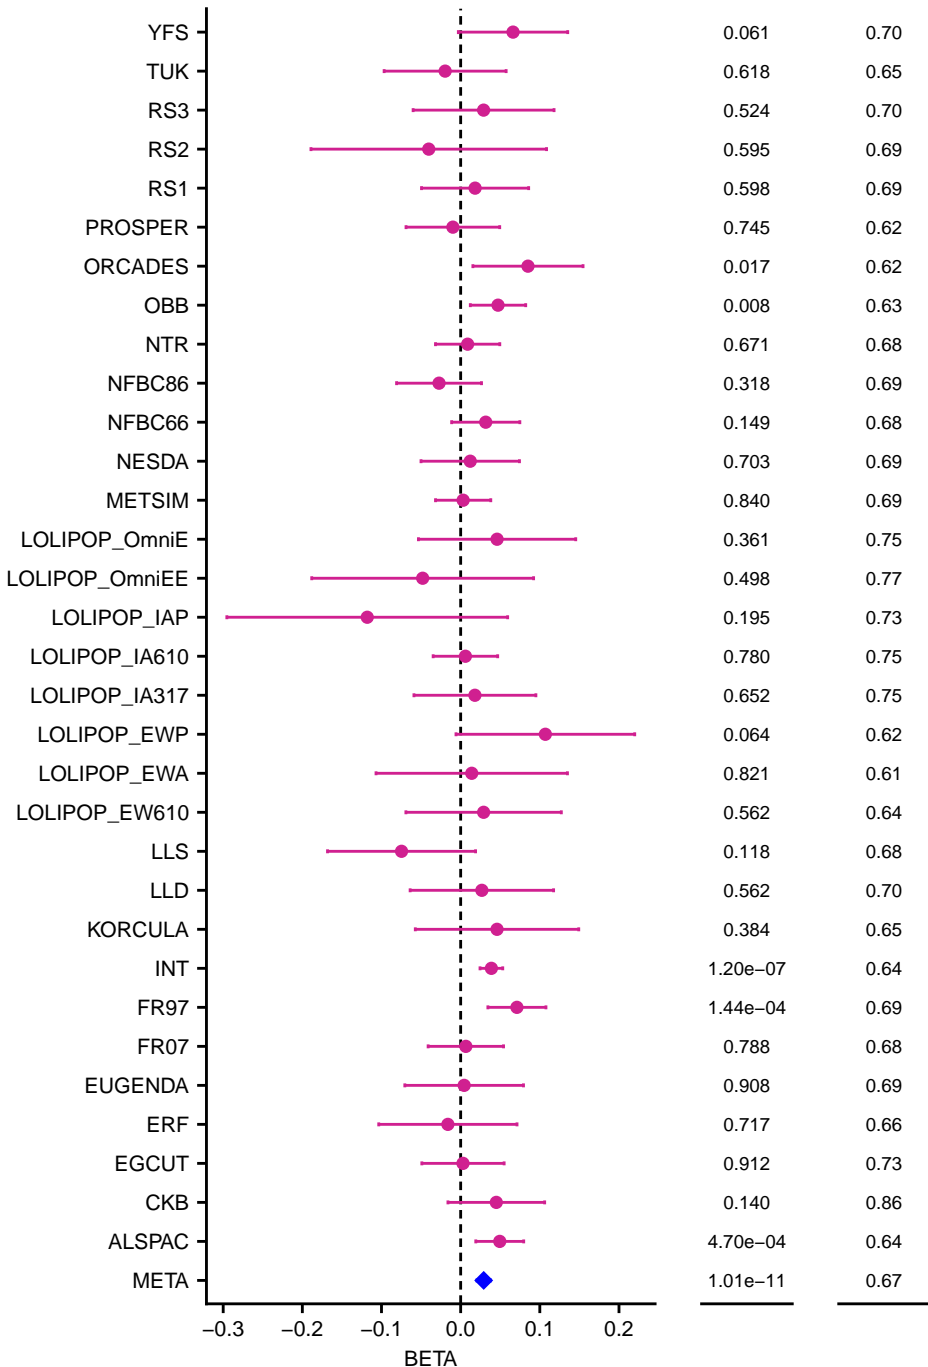

## chr6:127440047:T ApoBbyApoA1

P-value

EAF

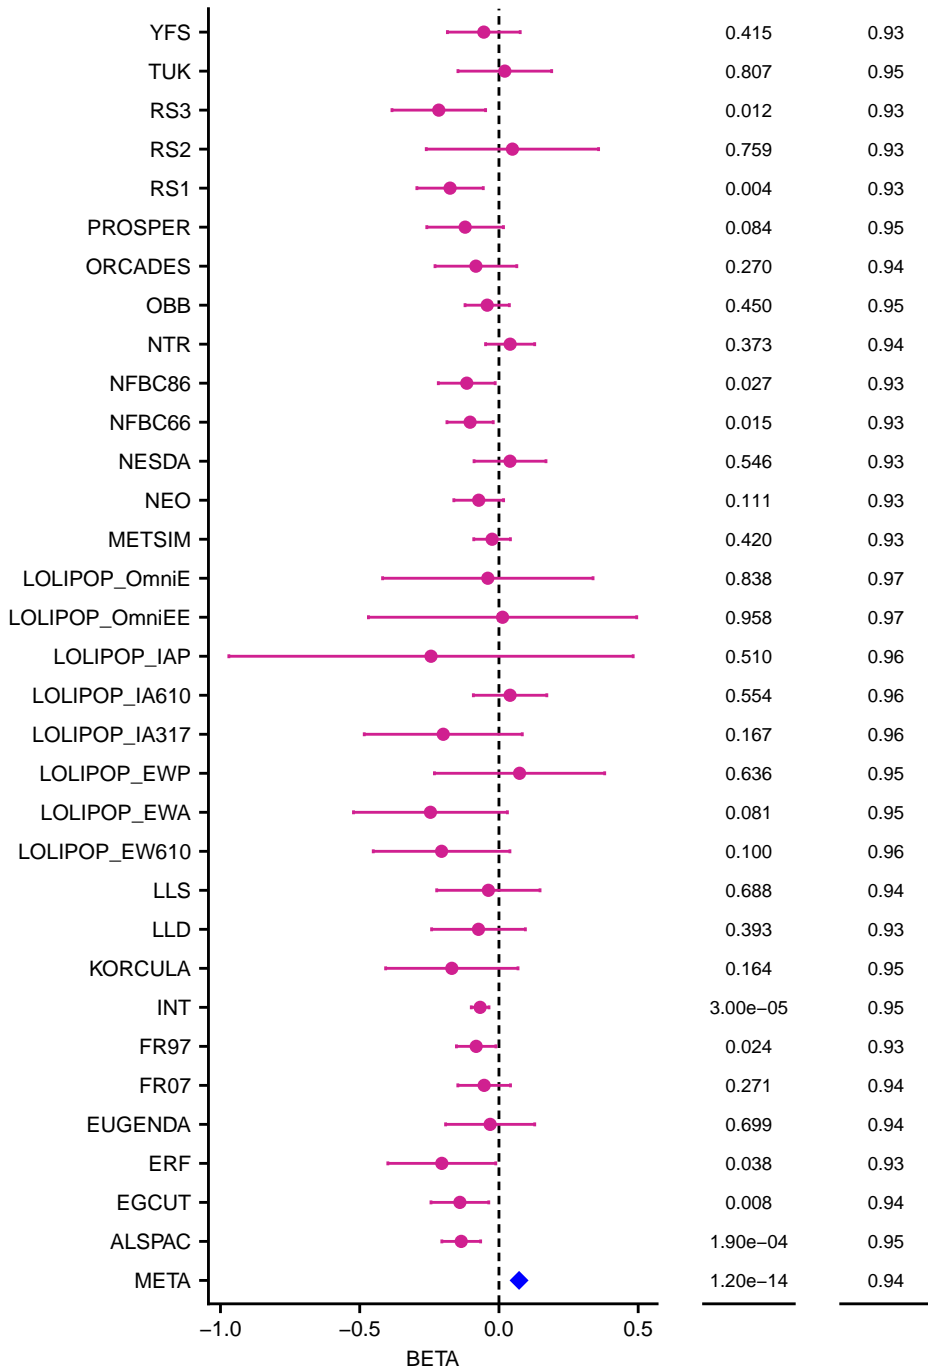

chr6:131931092:T Gln

P-value

EAF

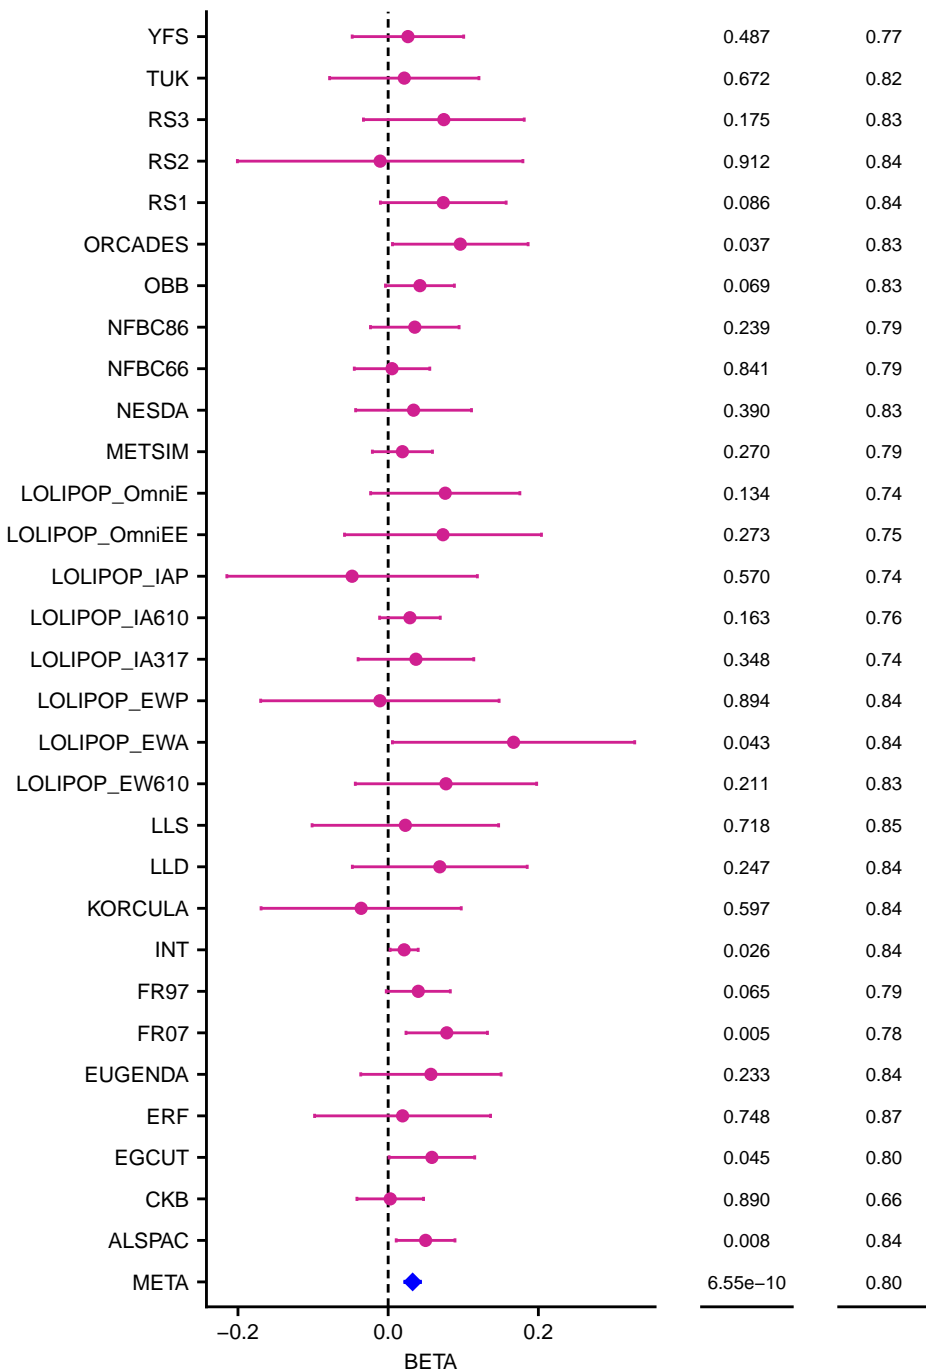

chr6:139834012:T S-VLDL-L

P-value

EAF

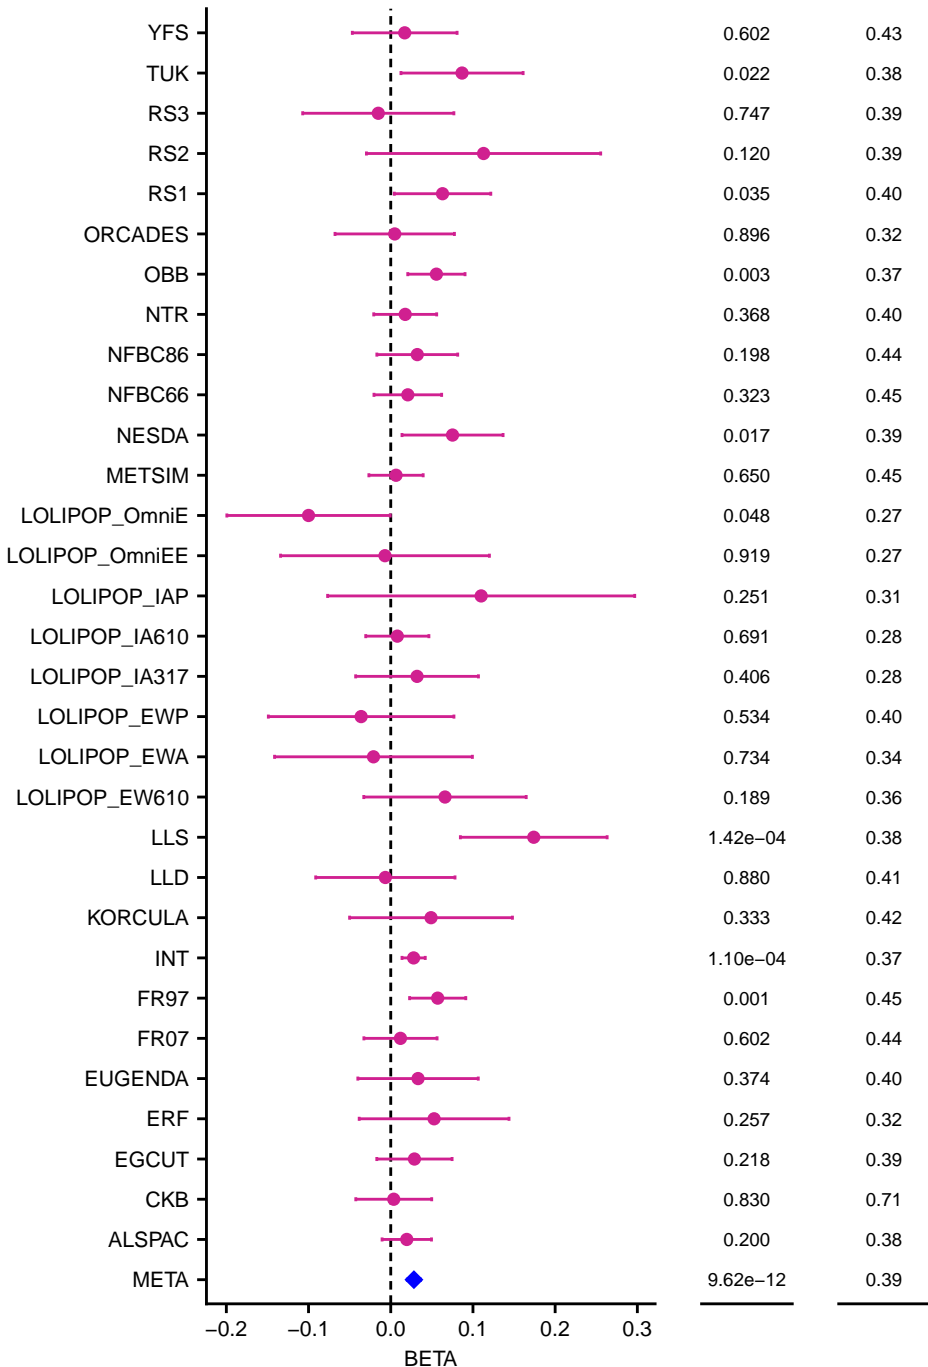

## chr6:161010118:A XXL-VLDL-TG

P-value

EAF

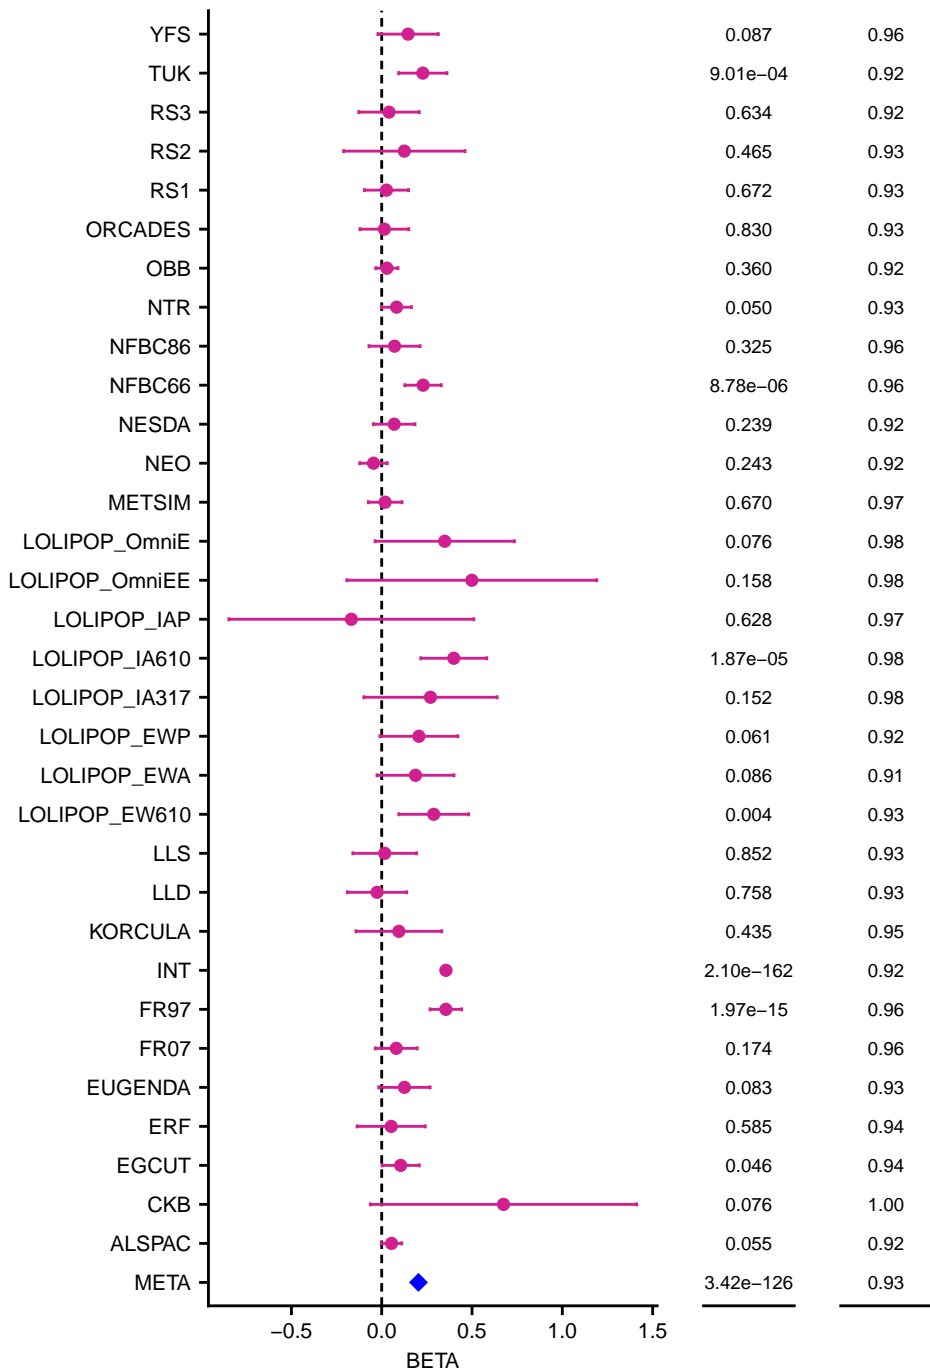

## chr7:1081618:A L-LDL-TG

P-value

EAF

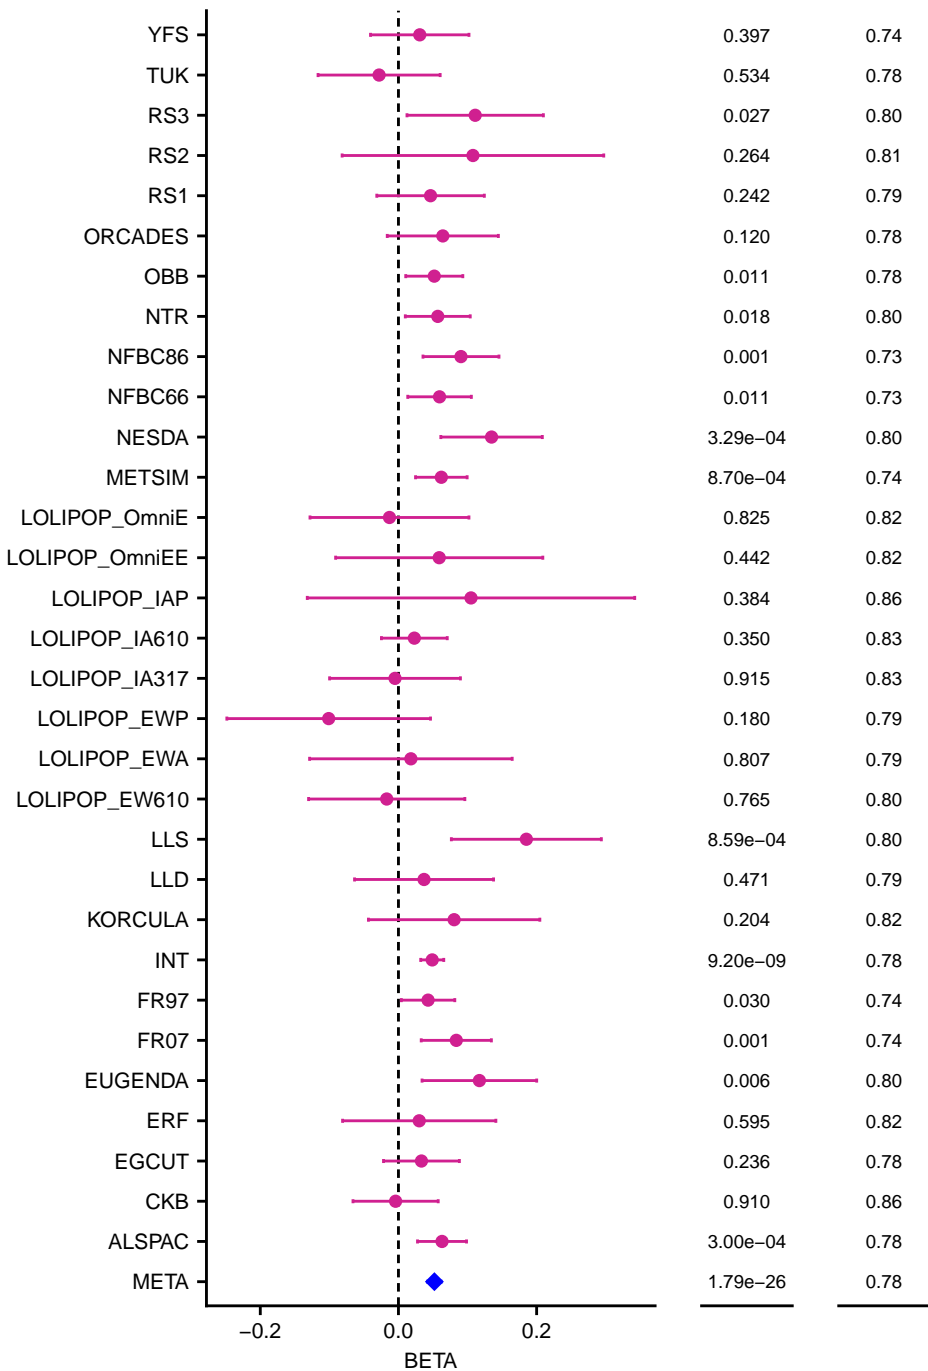



## chr7:6419333:C XL-HDL-CE

P-value

EAF

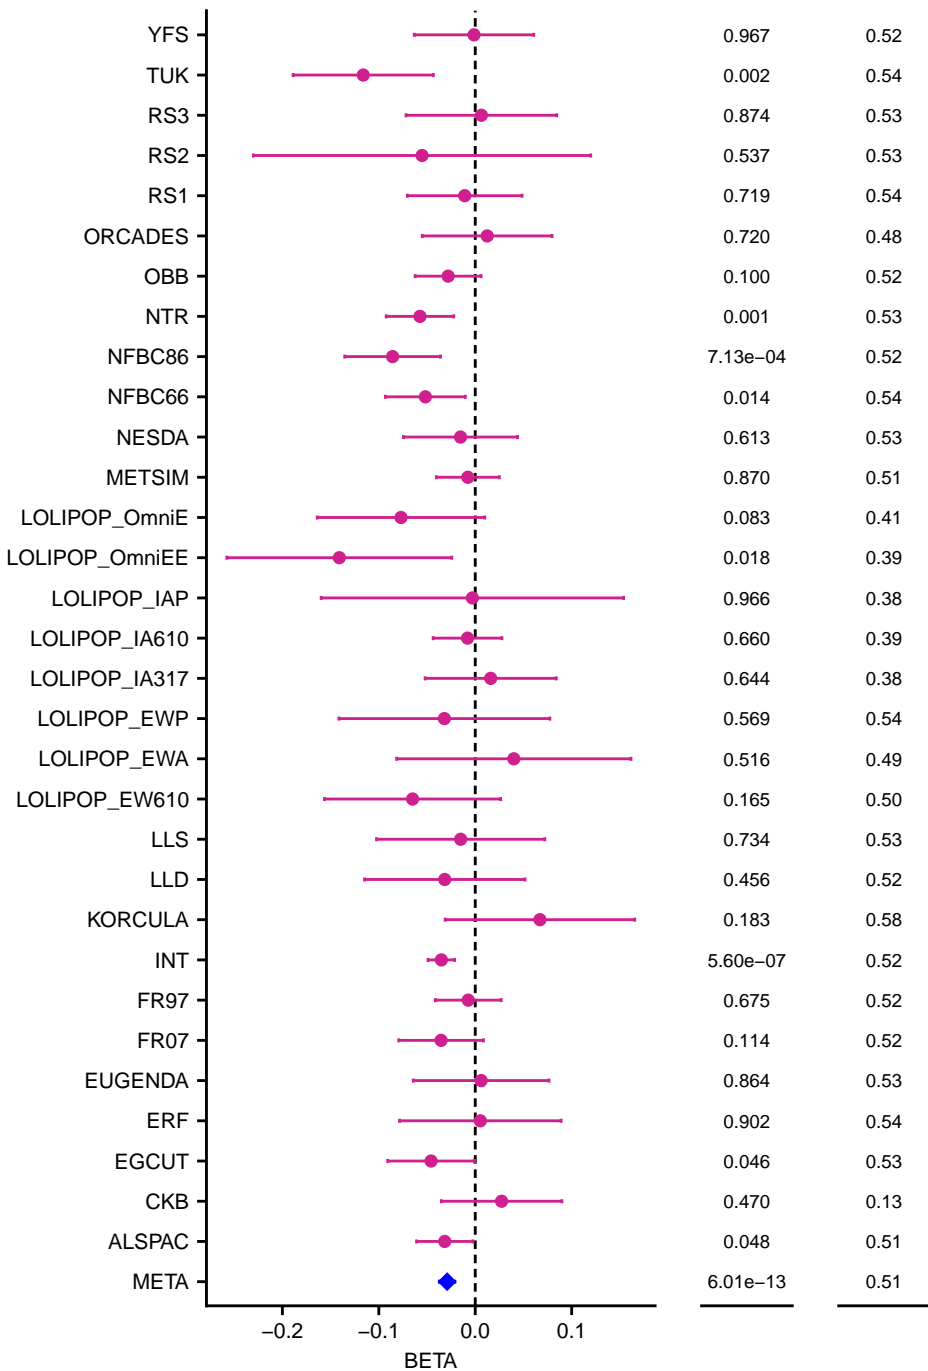

chr7:15062983:T Glc

P-value

EAF

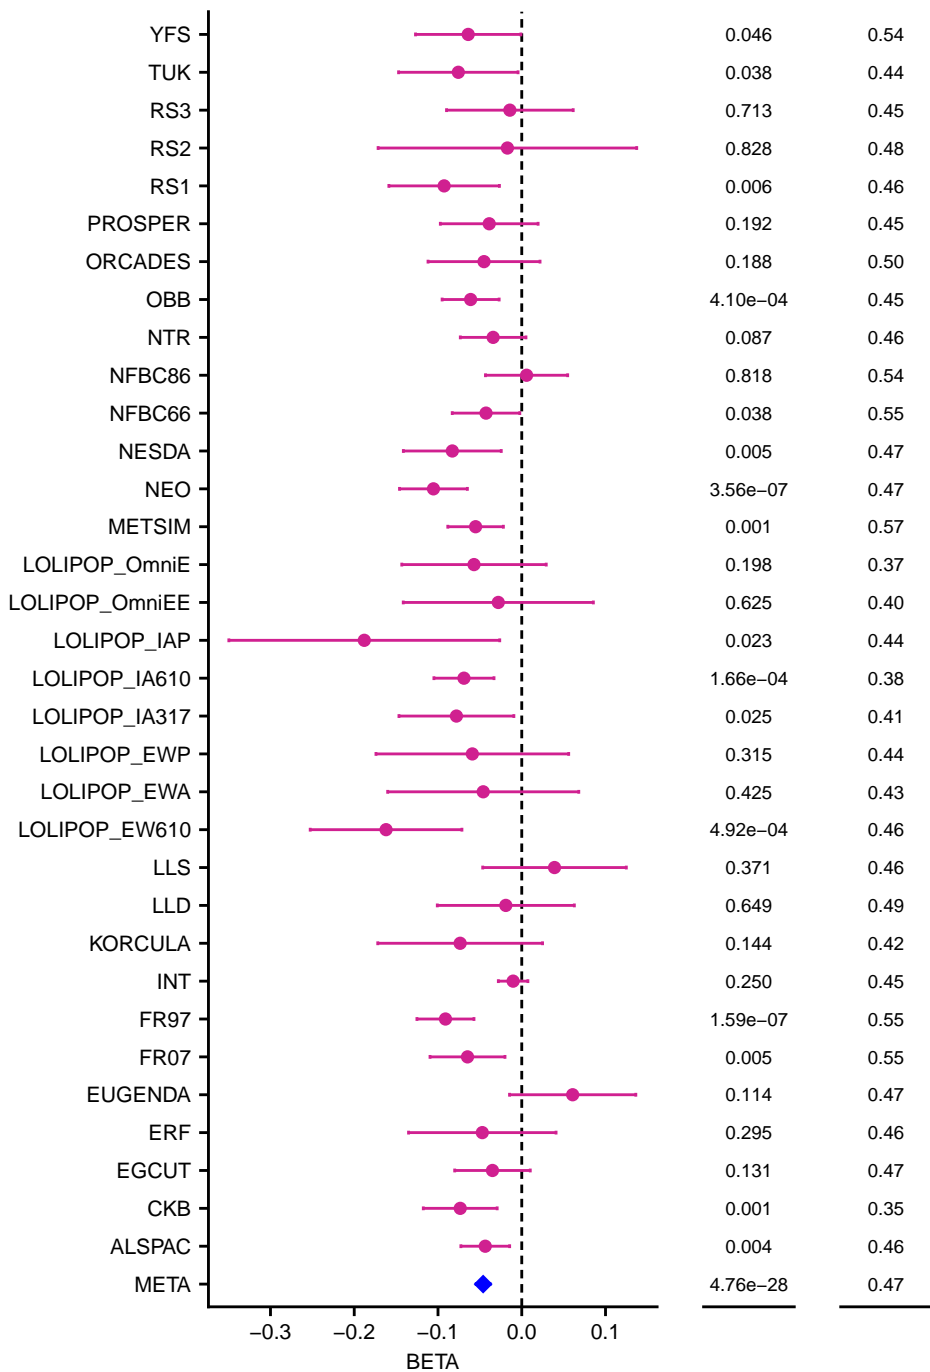

## chr7:17919258:T HDL2-C

P-value

EAF

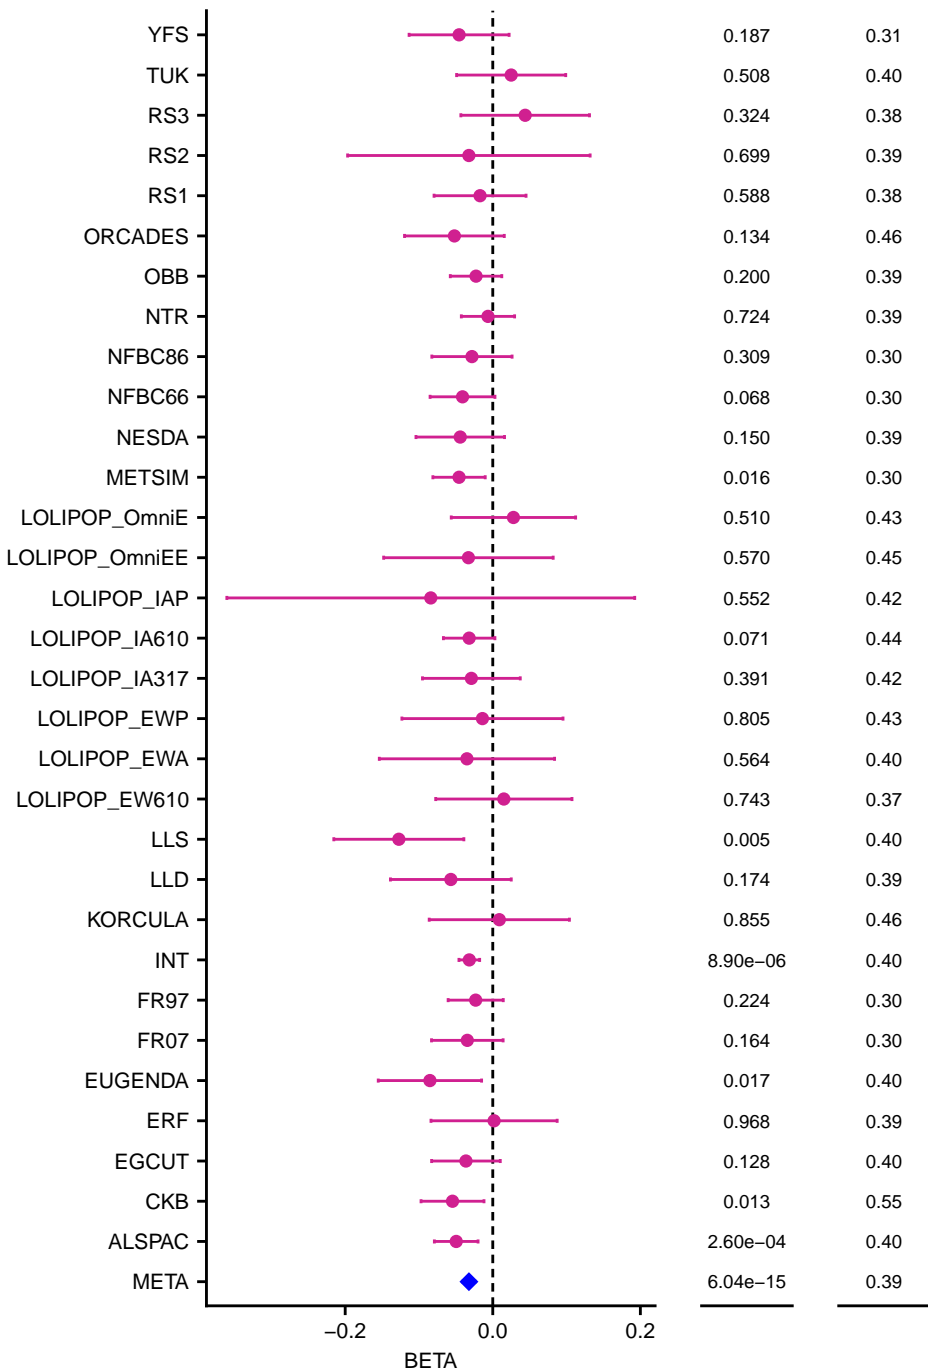

chr7:21611970:T IDL-P

P-value

EAF

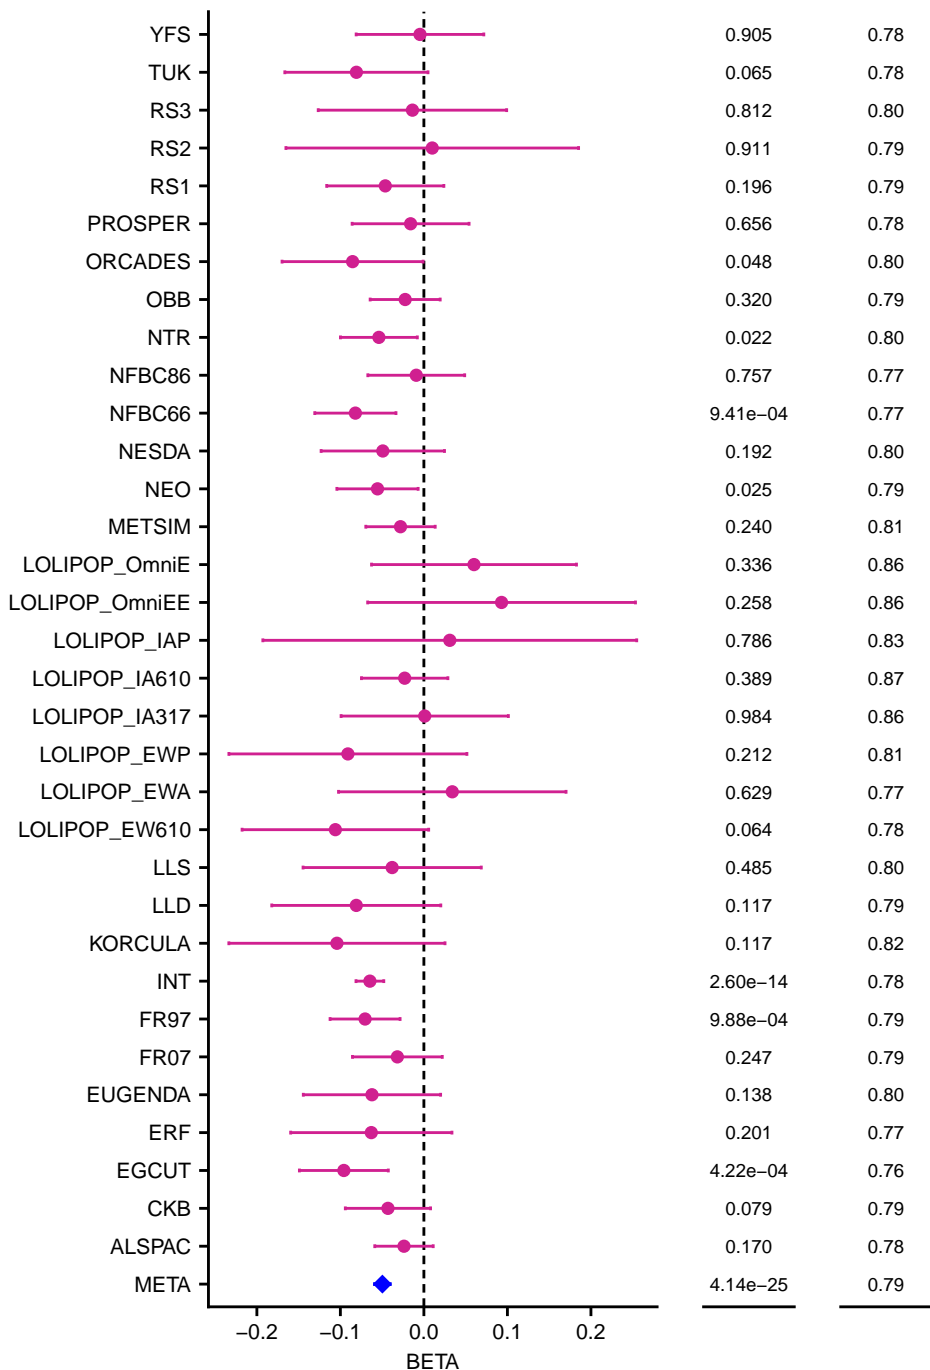

## chr7:25991826:T S-LDL-C\_percent

P-value

EAF

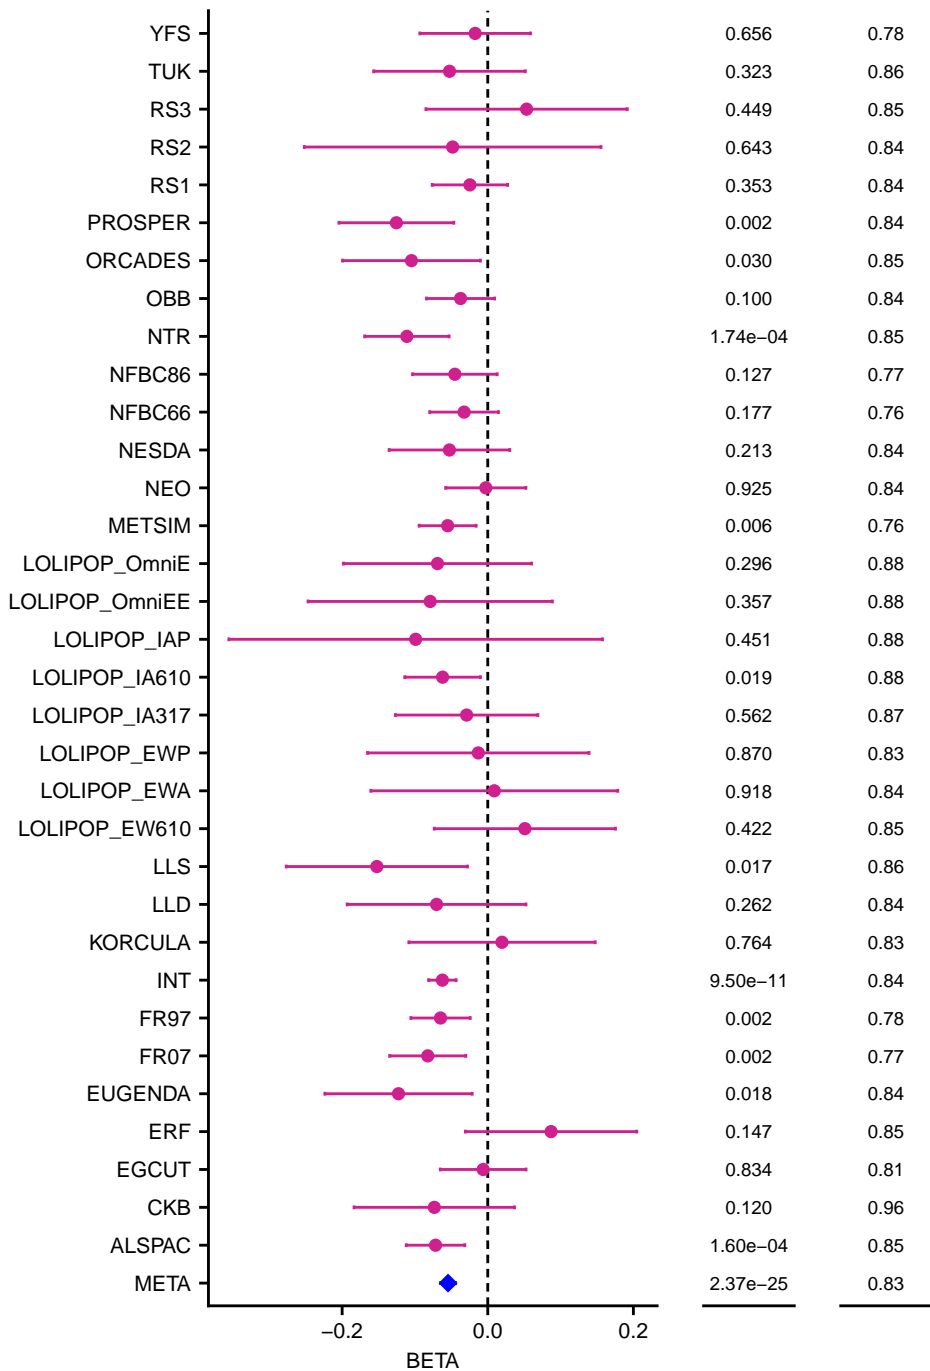

## chr7:28156606:C Tyr

P-value

EAF

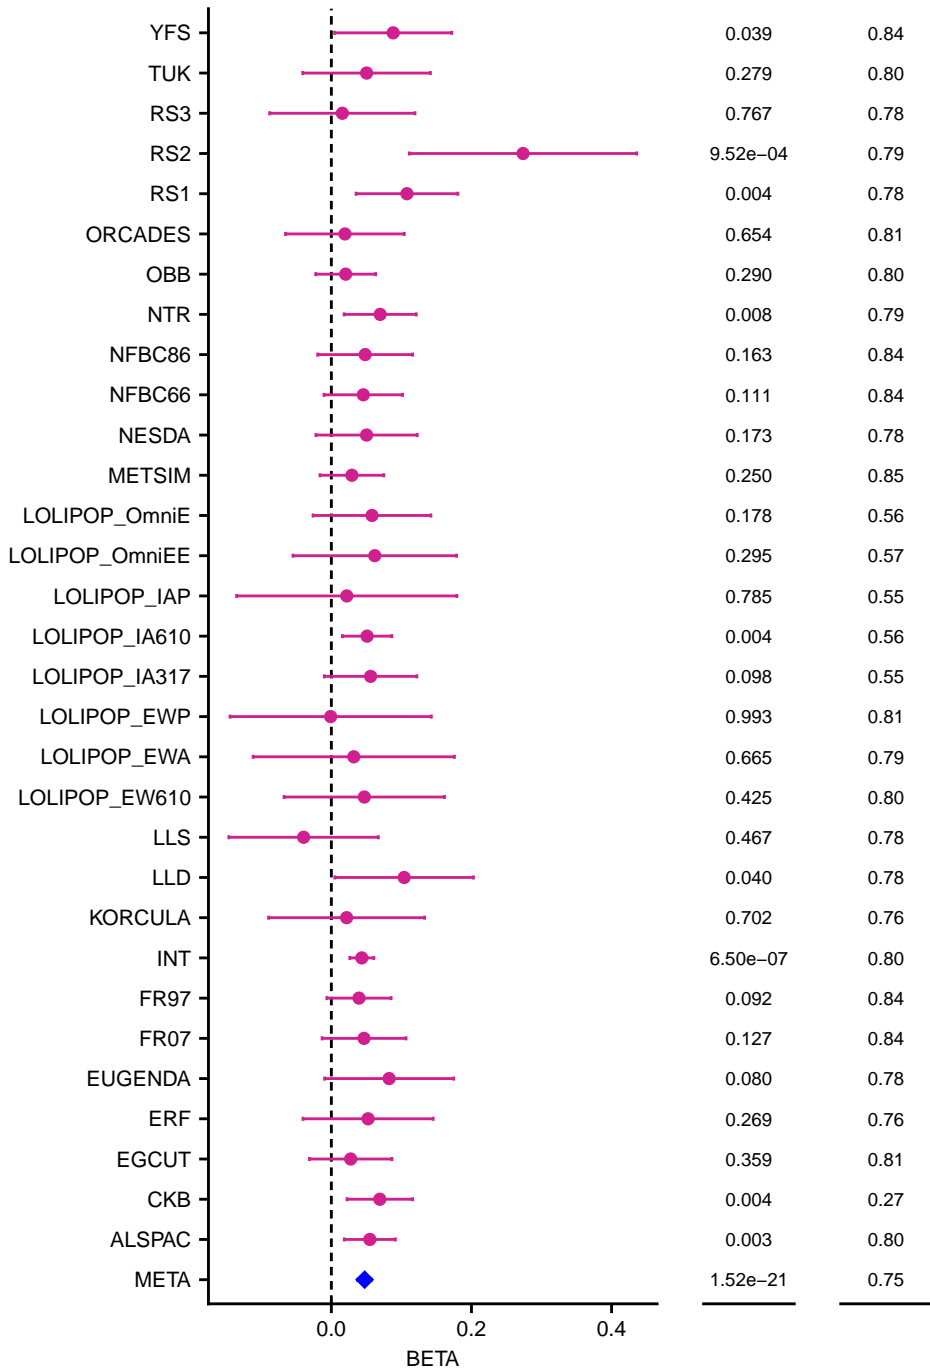

chr7:44219338:A Glc

P-value

EAF

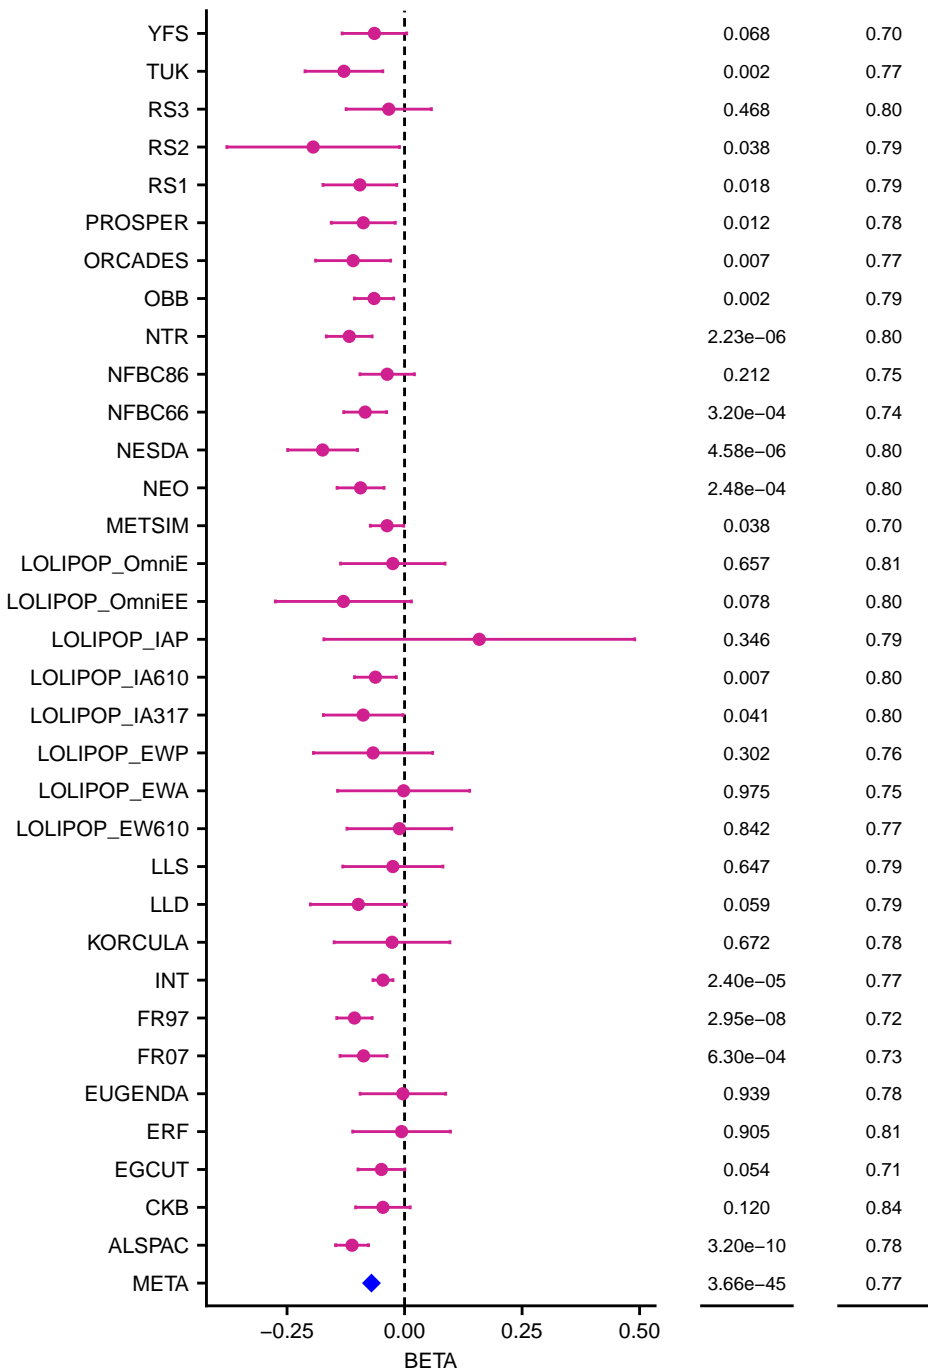

chr7:46753491:A Crea

P-value

EAF

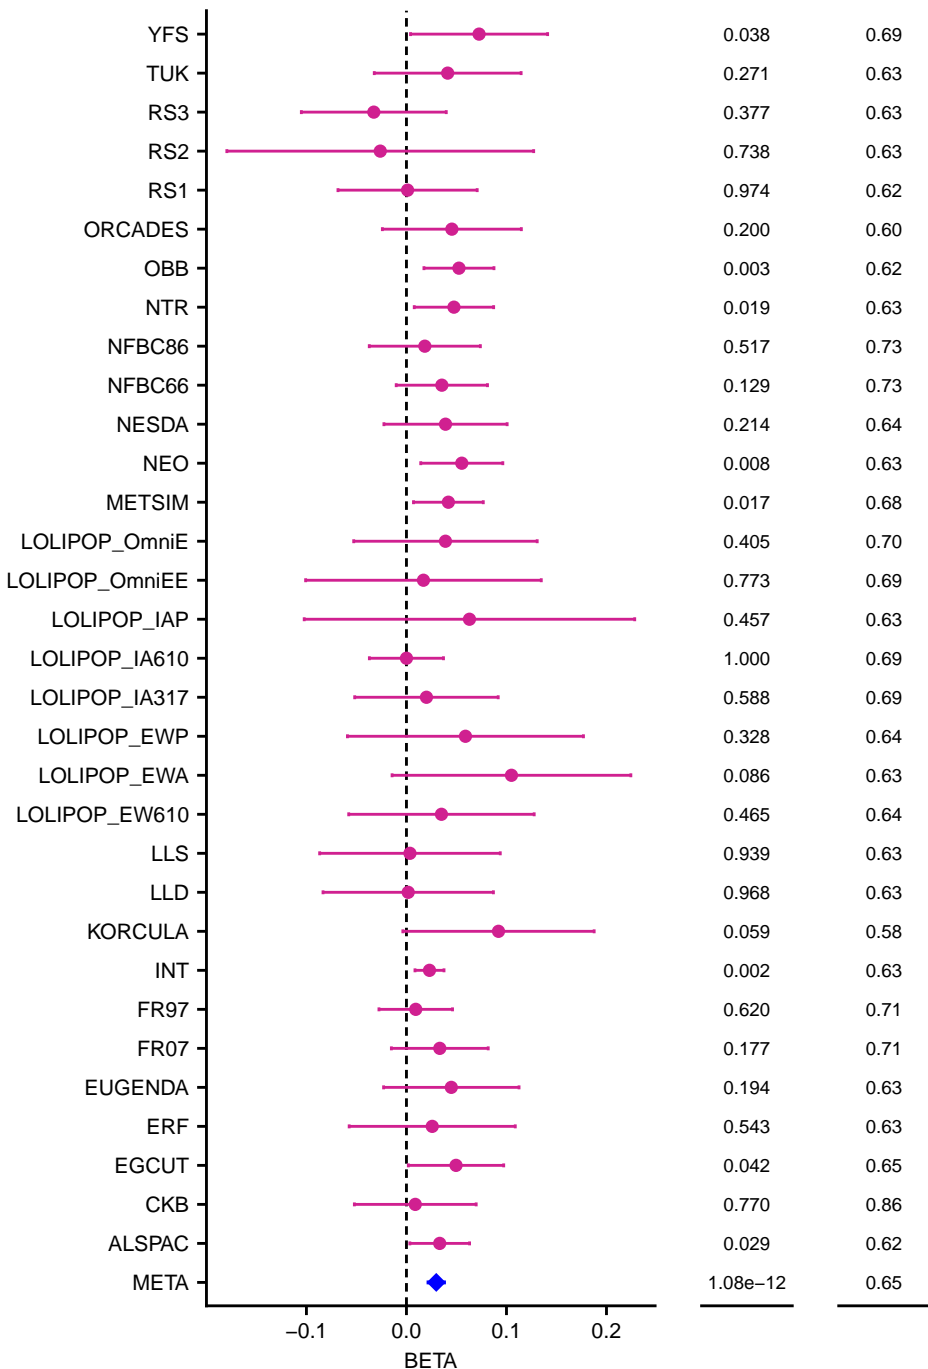



chr7:50763624:T Gic

P-value

EAF

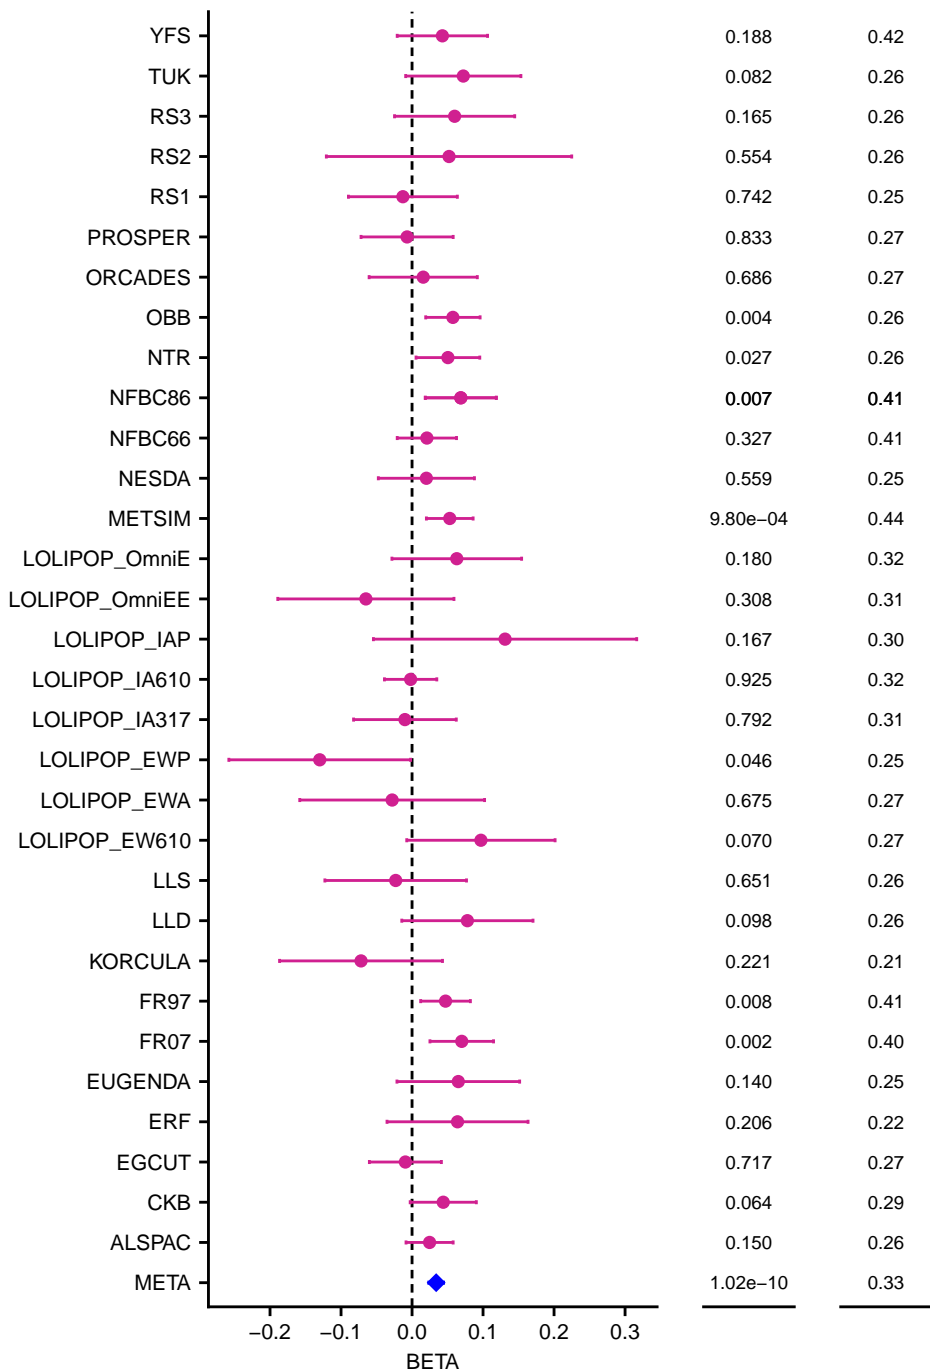

chr7:56079744:A Gly

P-value

EAF

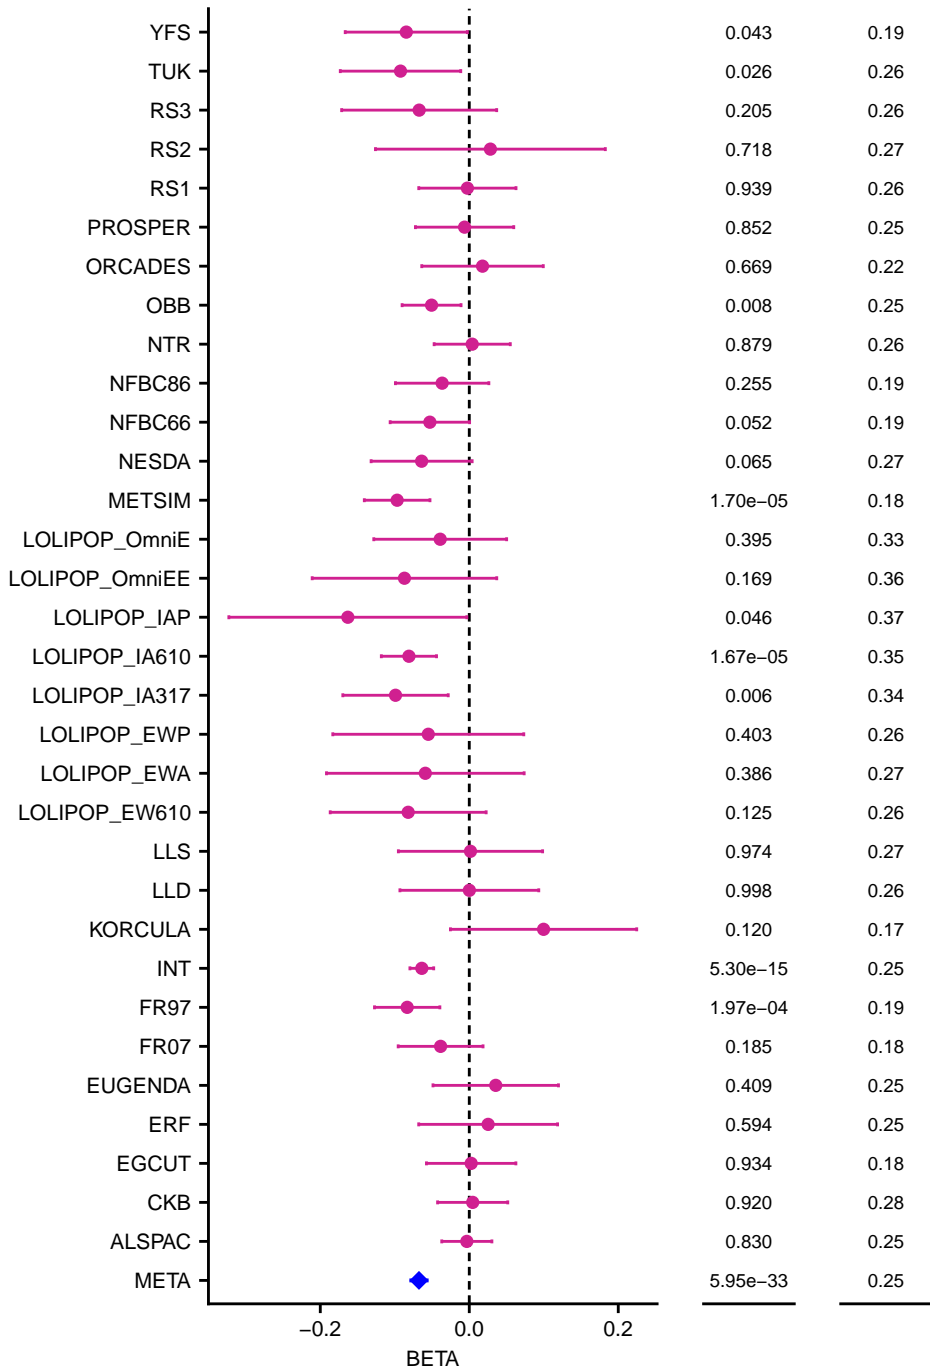

## chr7:72976123:T S-VLDL-TG

P-value

EAF

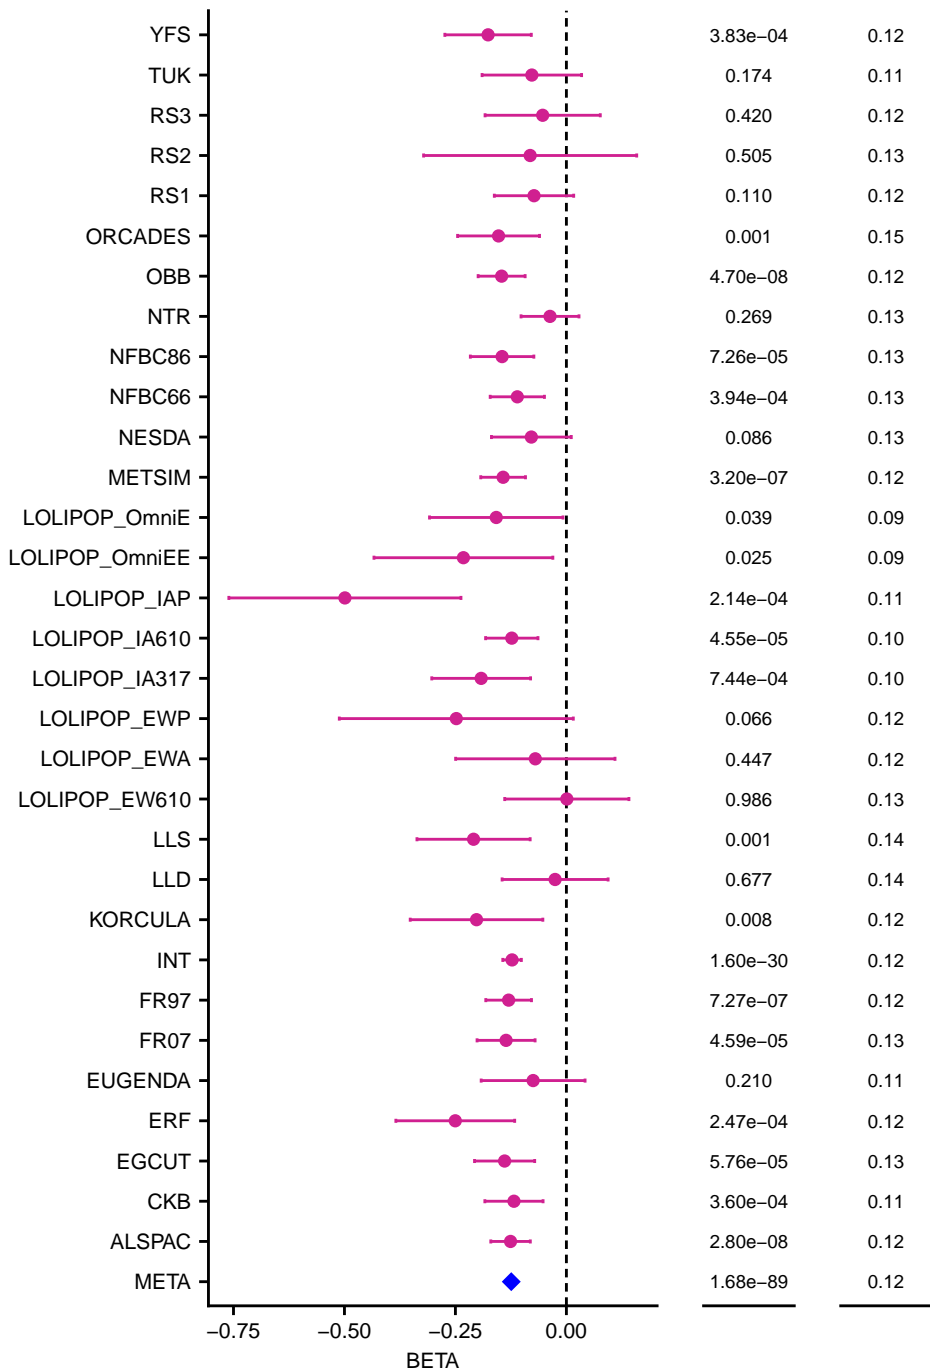

chr7:77452430:T Crea

P-value

EAF

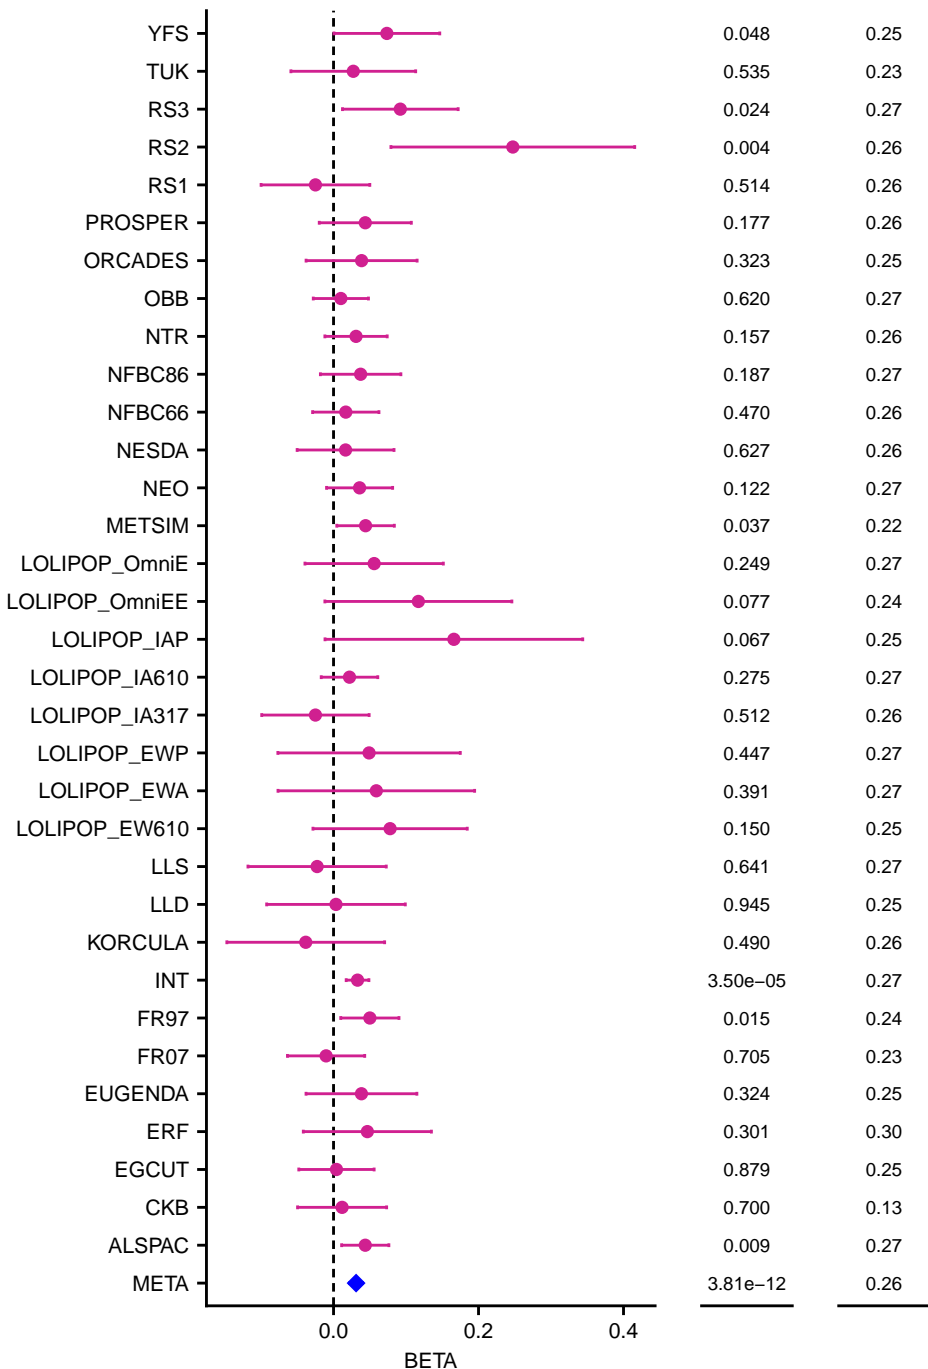

## chr7:87132916:T S-HDL-PL\_percent

P-value

EAF

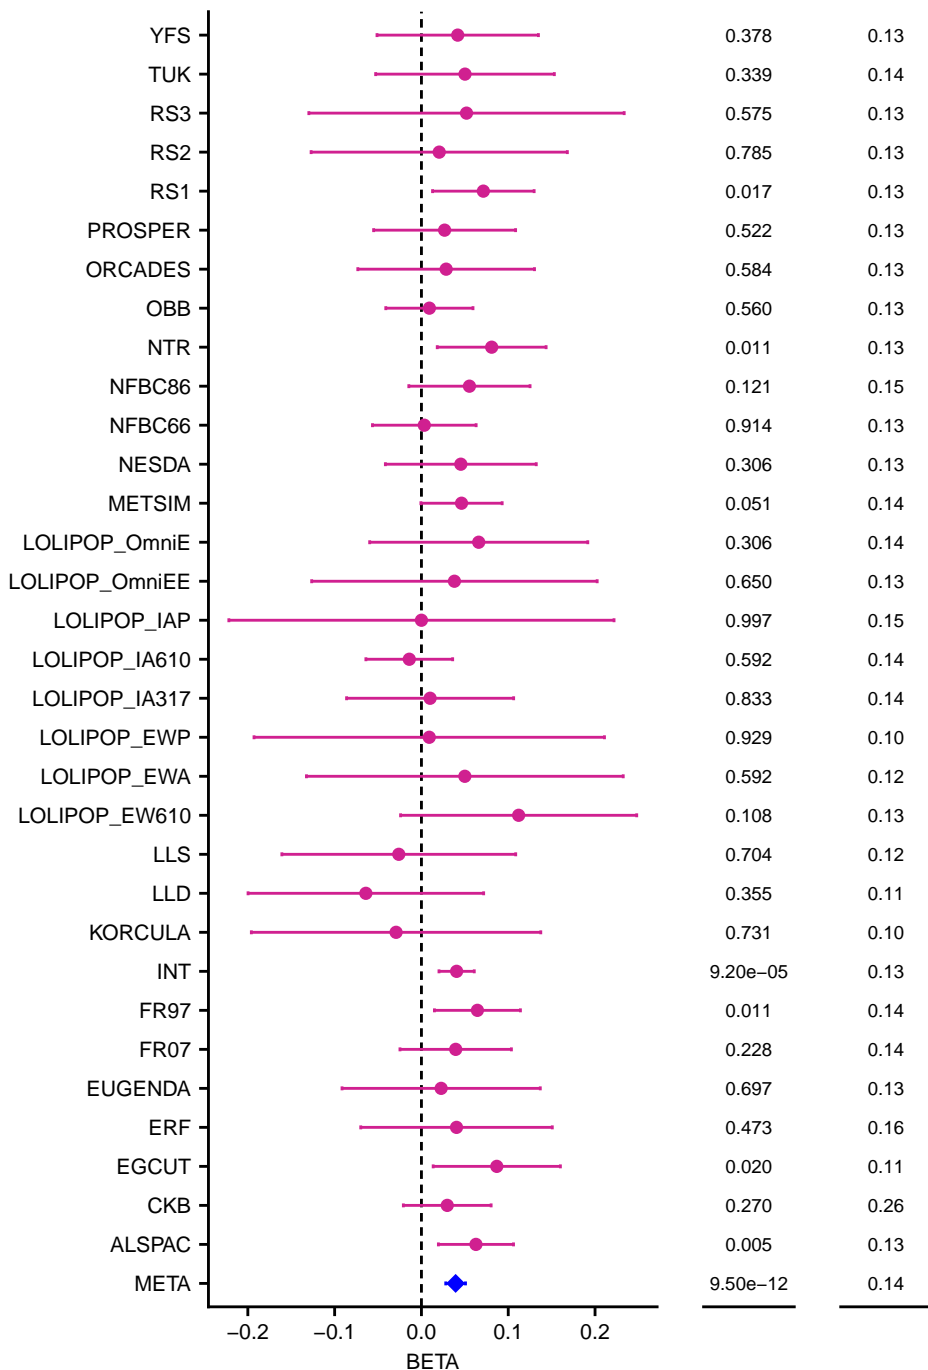

## chr7:94953895:A HDL-D

P-value

EAF

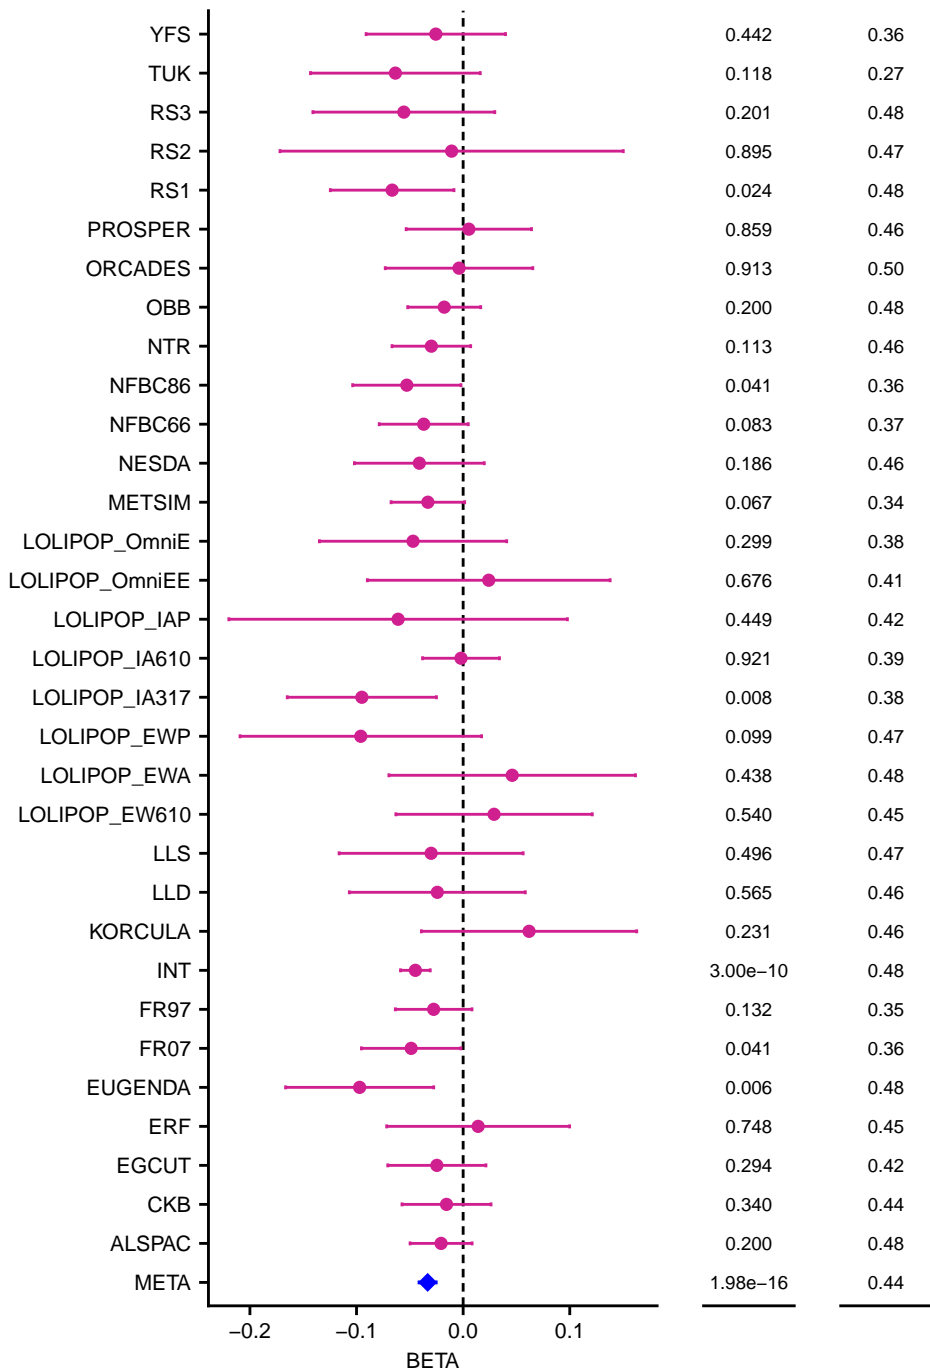

## chr7:130463192:C ApoBbyApoA1

P-value

EAF

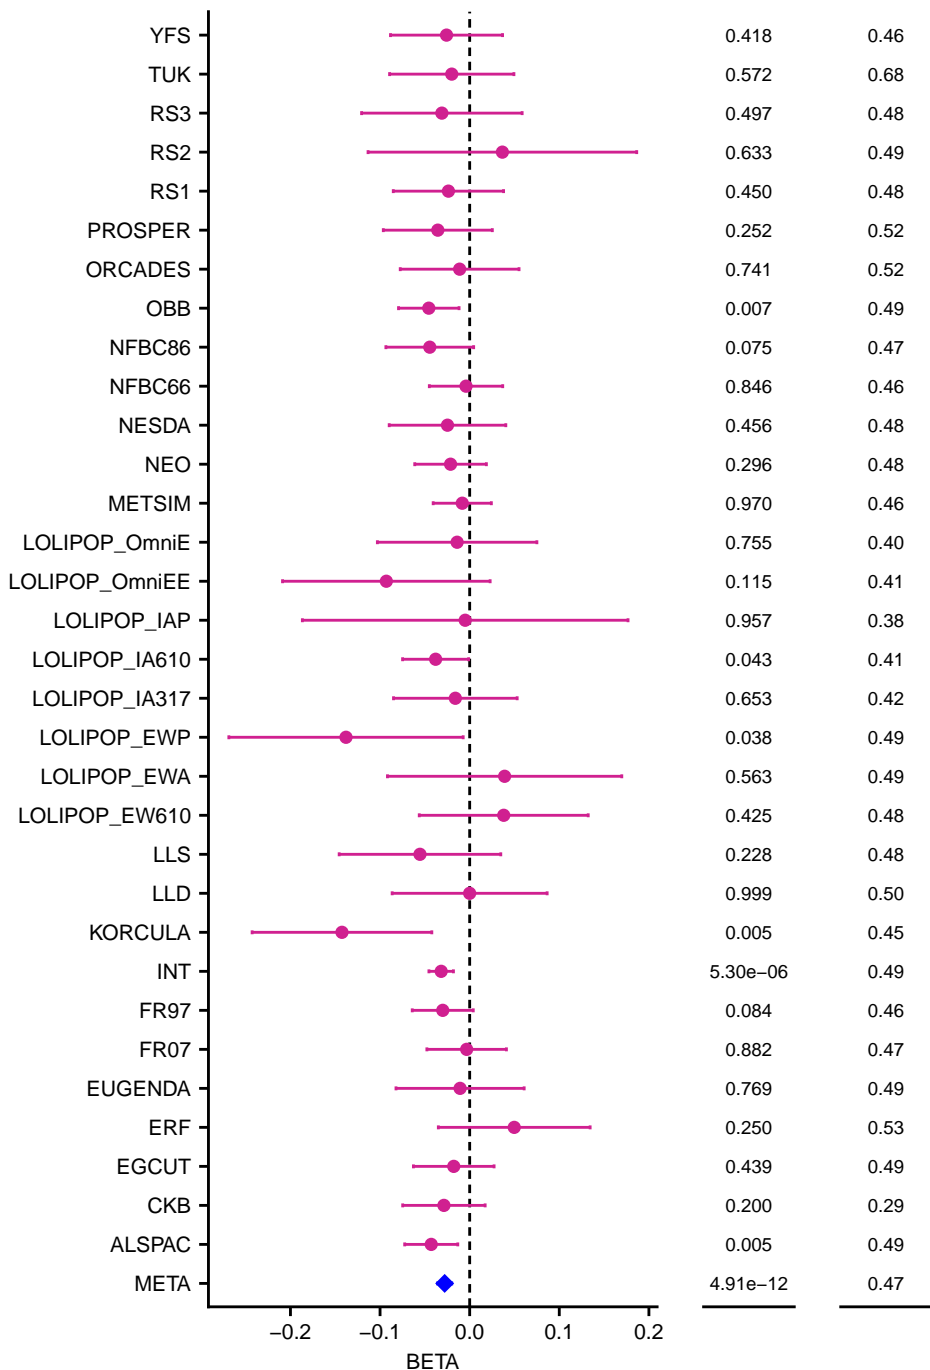

## chr7:150213314:A L-HDL-PL

P-value

EAF

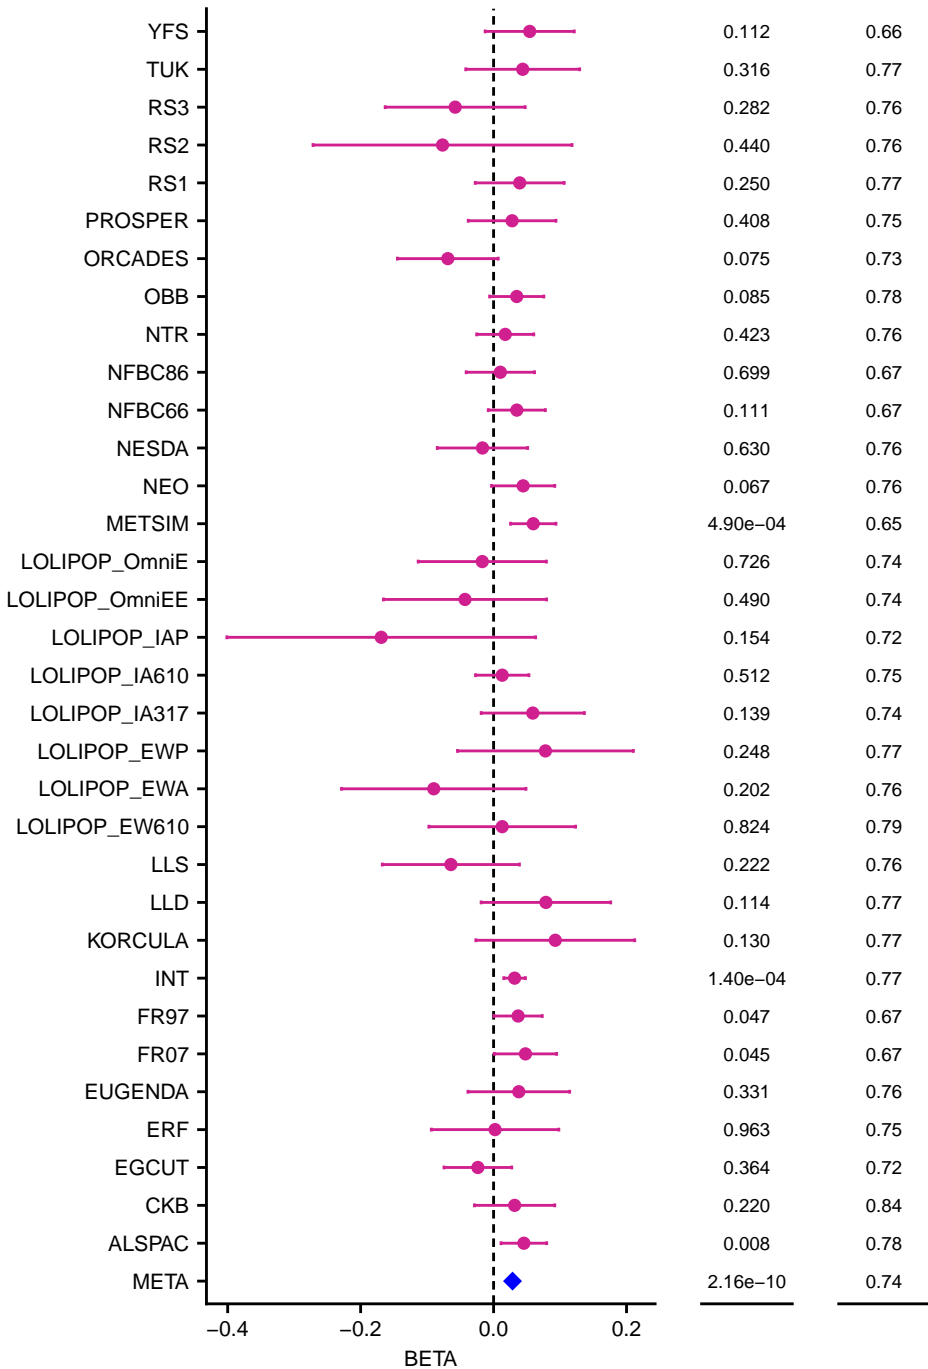



chr7:151414329:T Crea

P-value

EAF

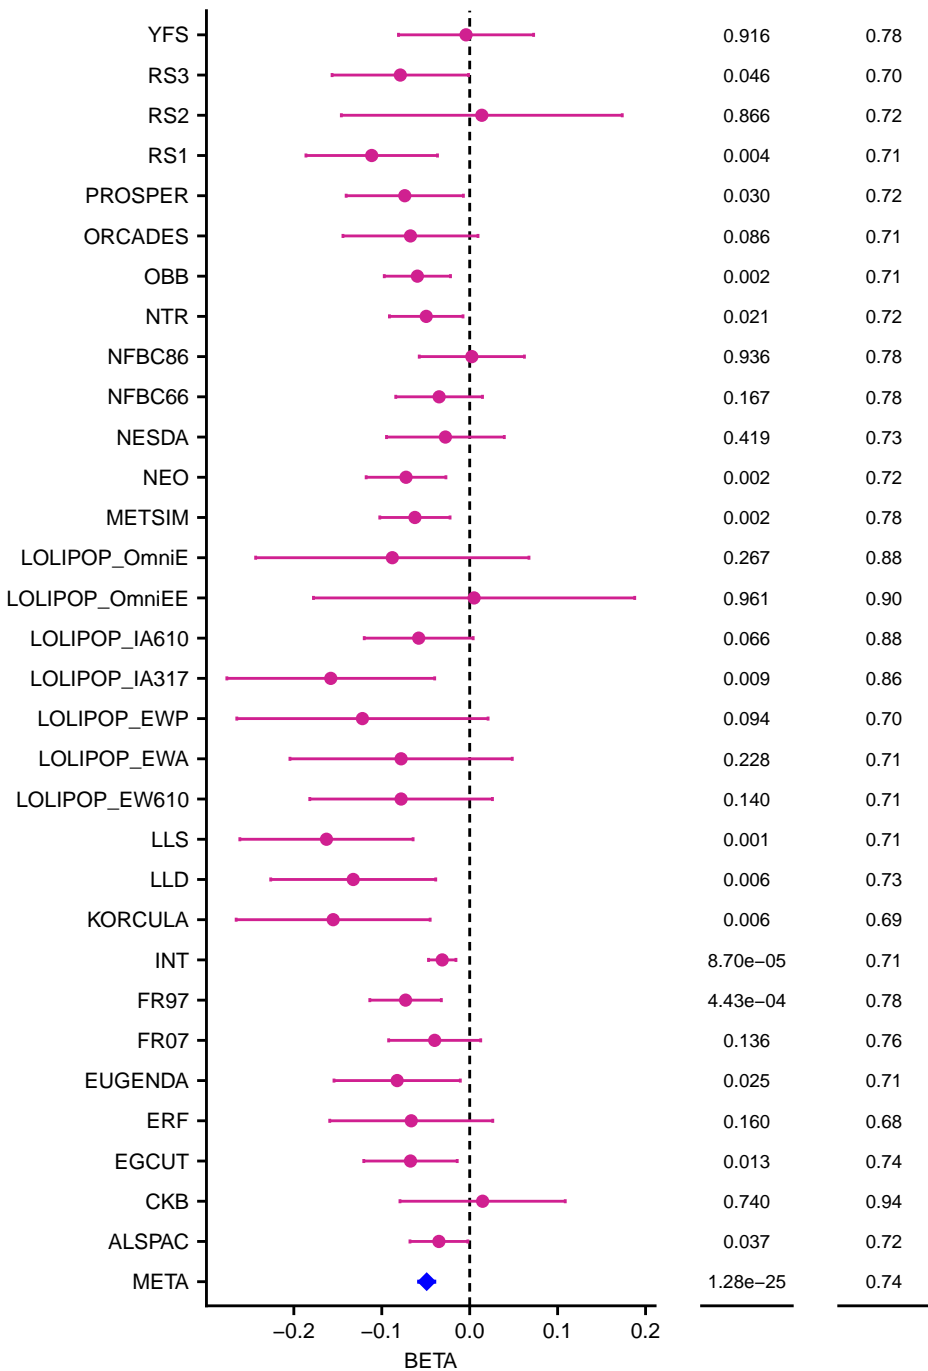

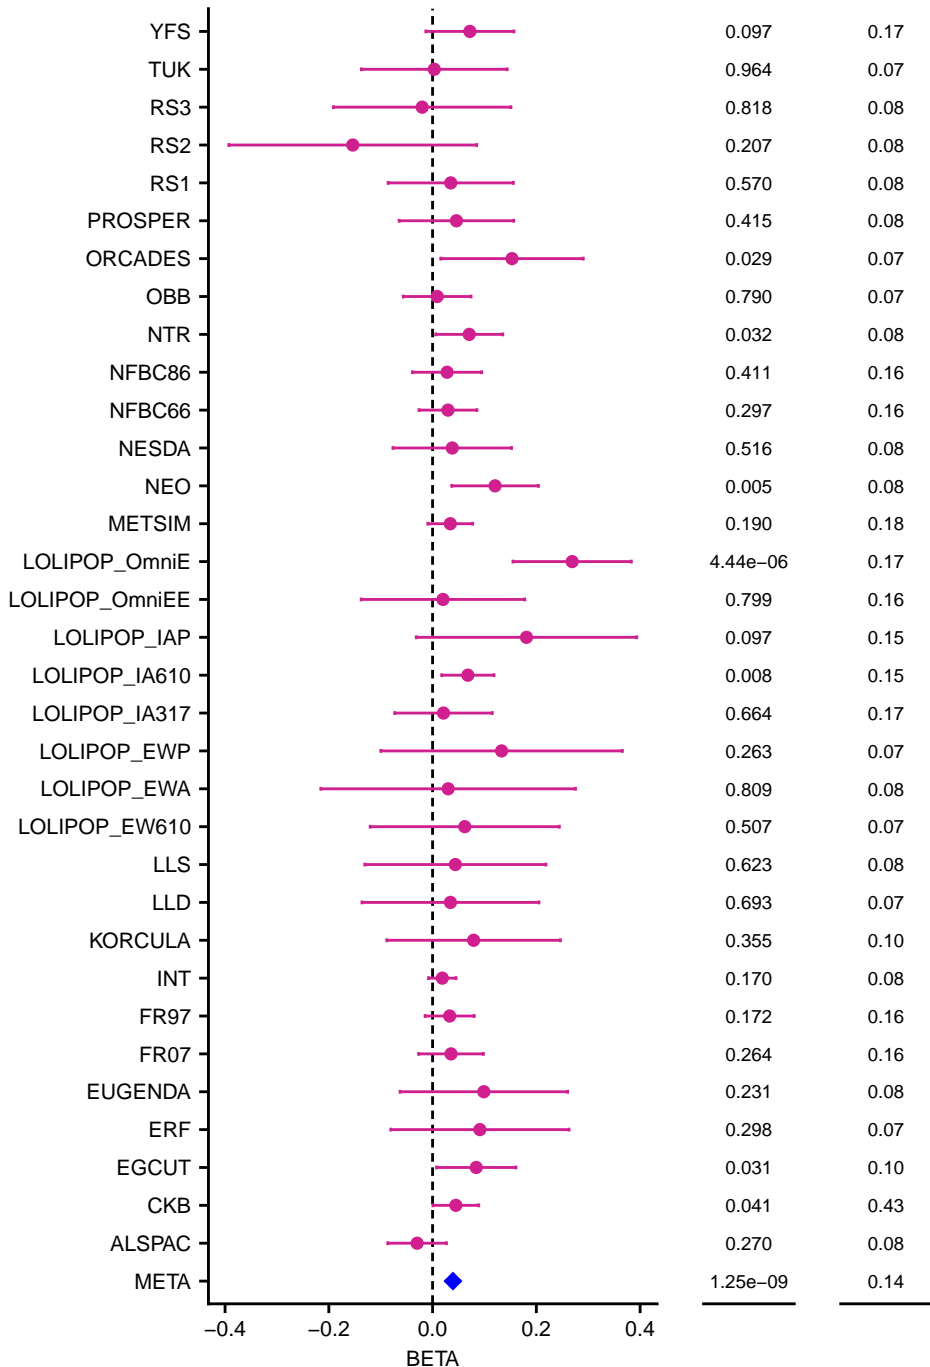

## chr8:9183358:A Gly

P-value

EAF

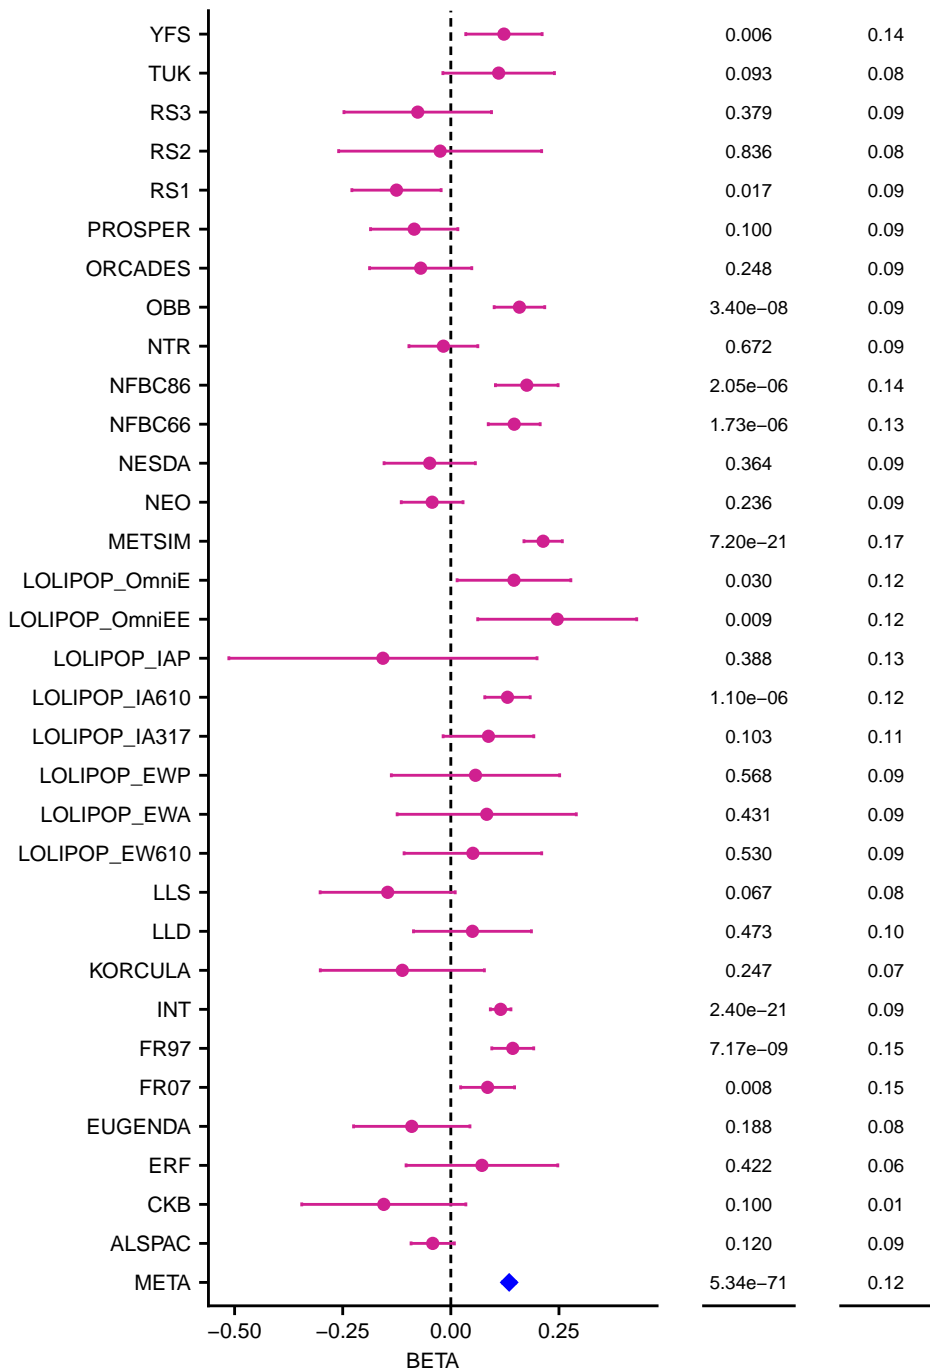

## chr8:19912370:A S-VLDL-TG

P-value

EAF

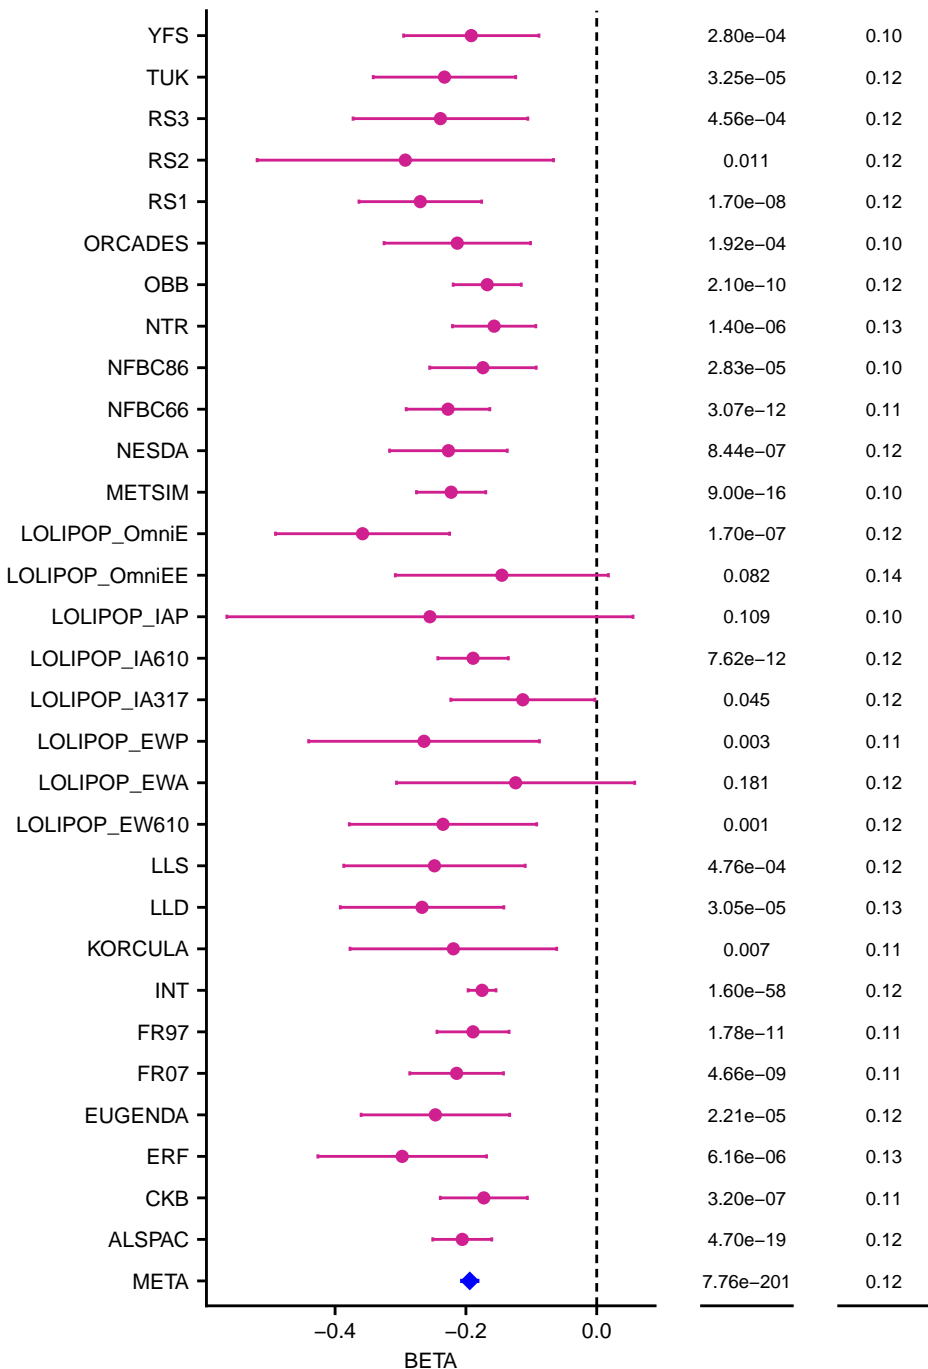

chr8:23777006:A Crea

P-value

EAF

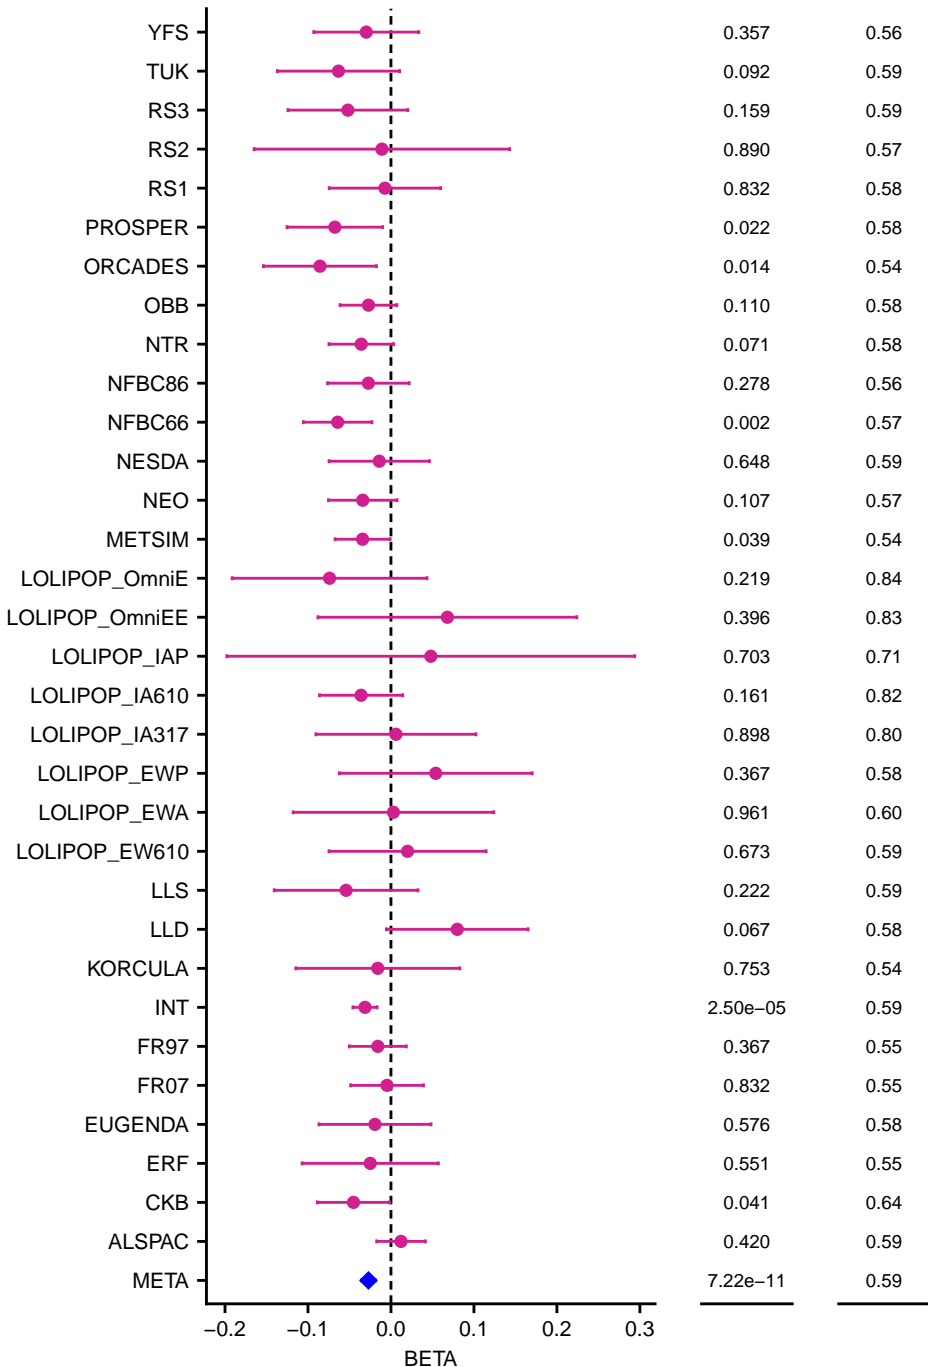

chr8:50001216:A Ala

P-value

EAF

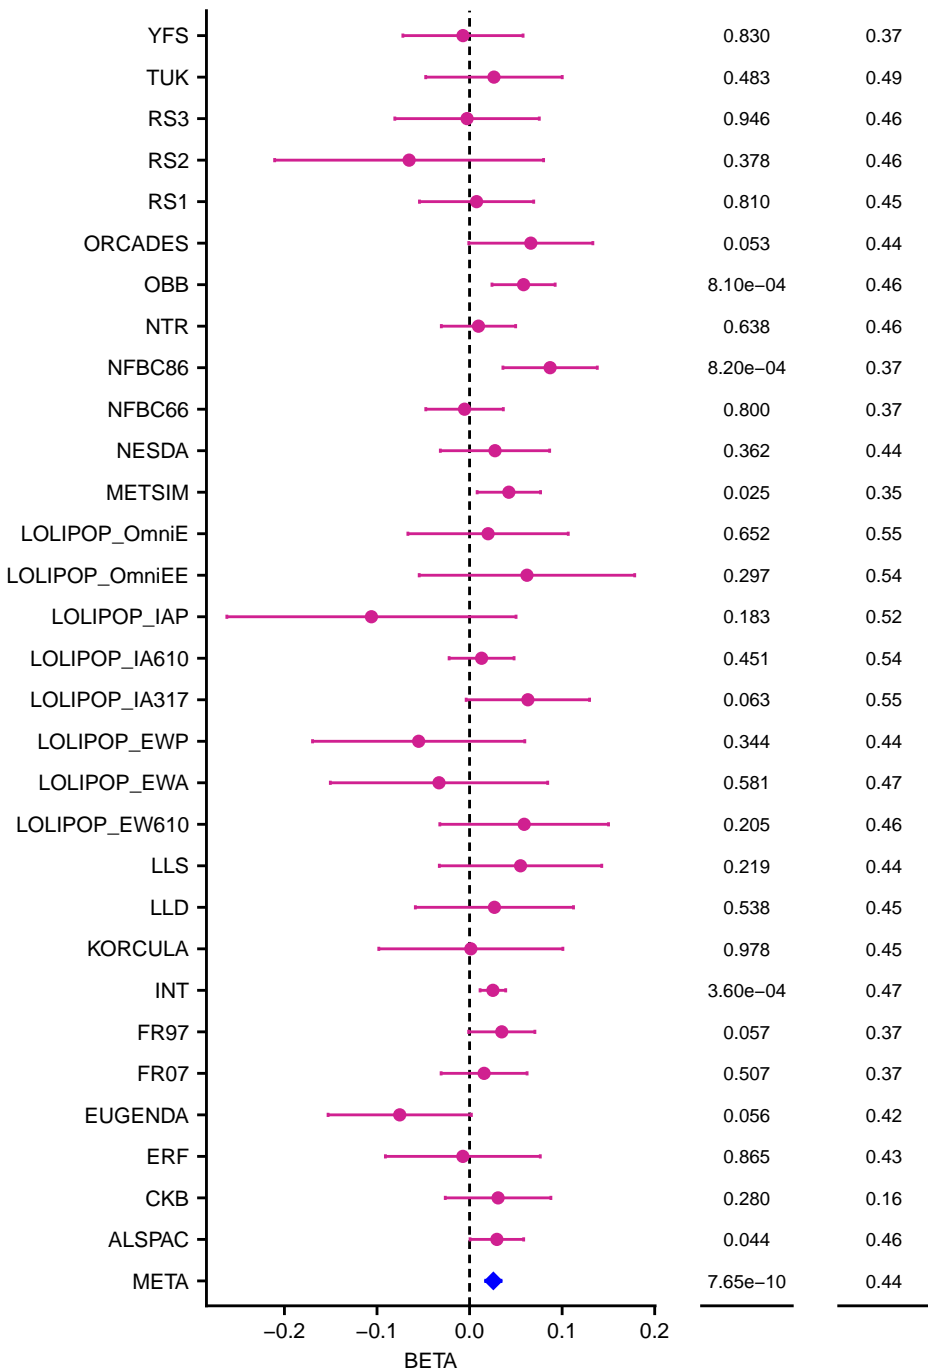

chr8:55410392:T PUFA

P-value

EAF

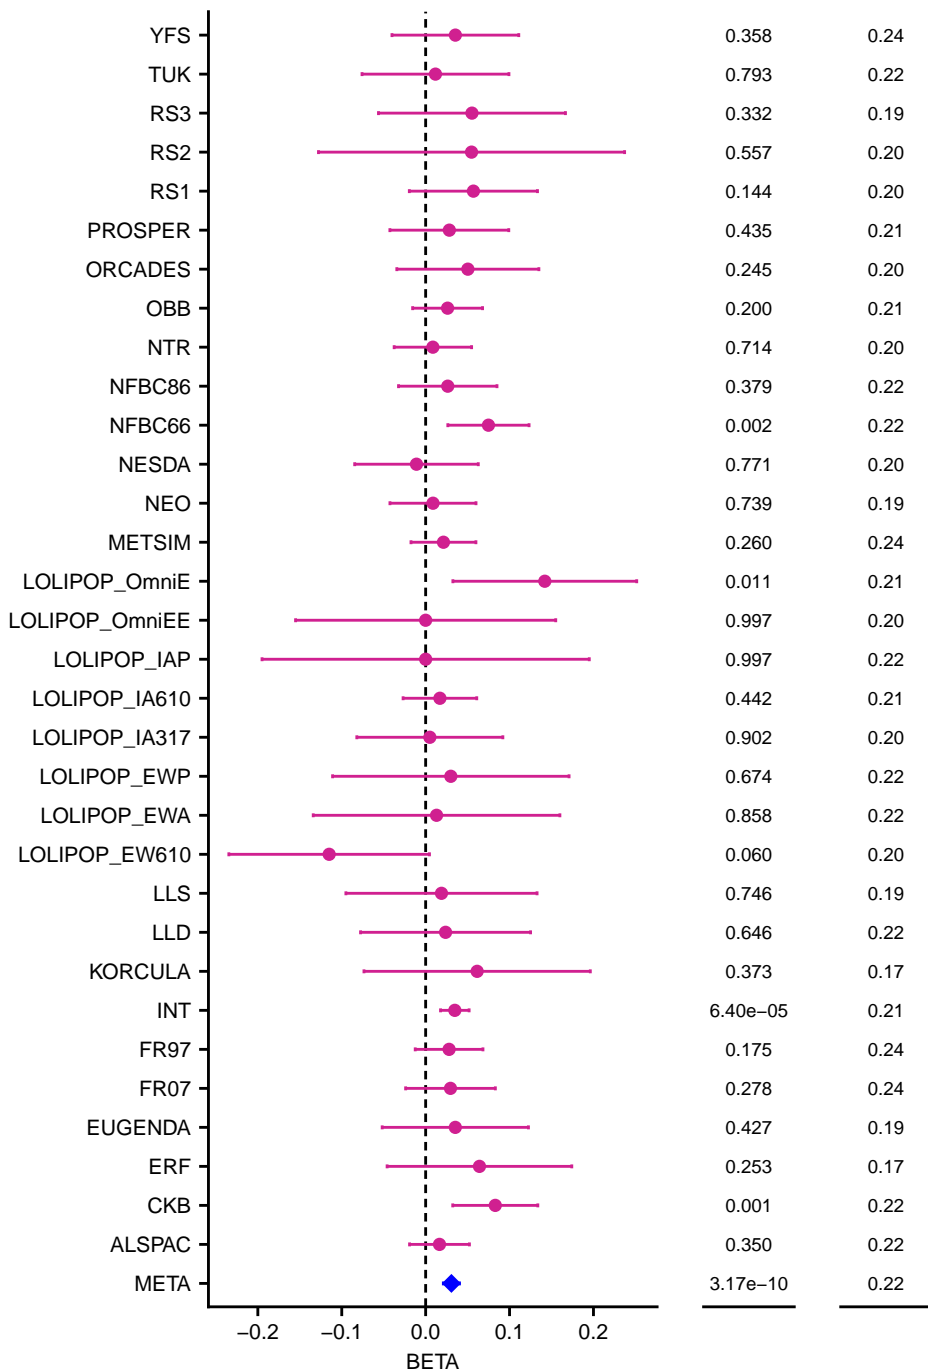

## chr8:59393273:A XL-HDL-TG

P-value

EAF

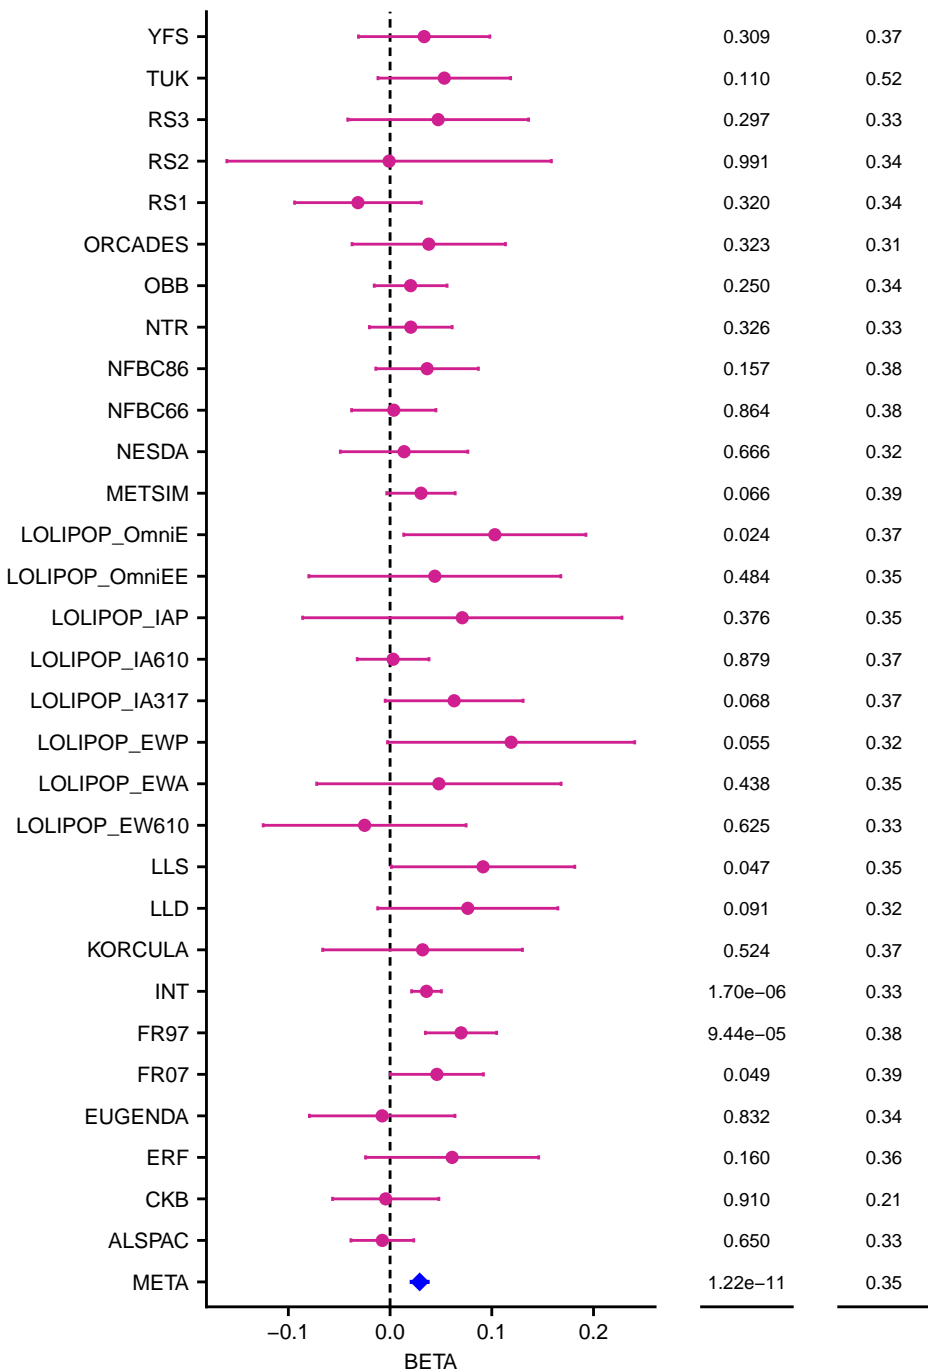



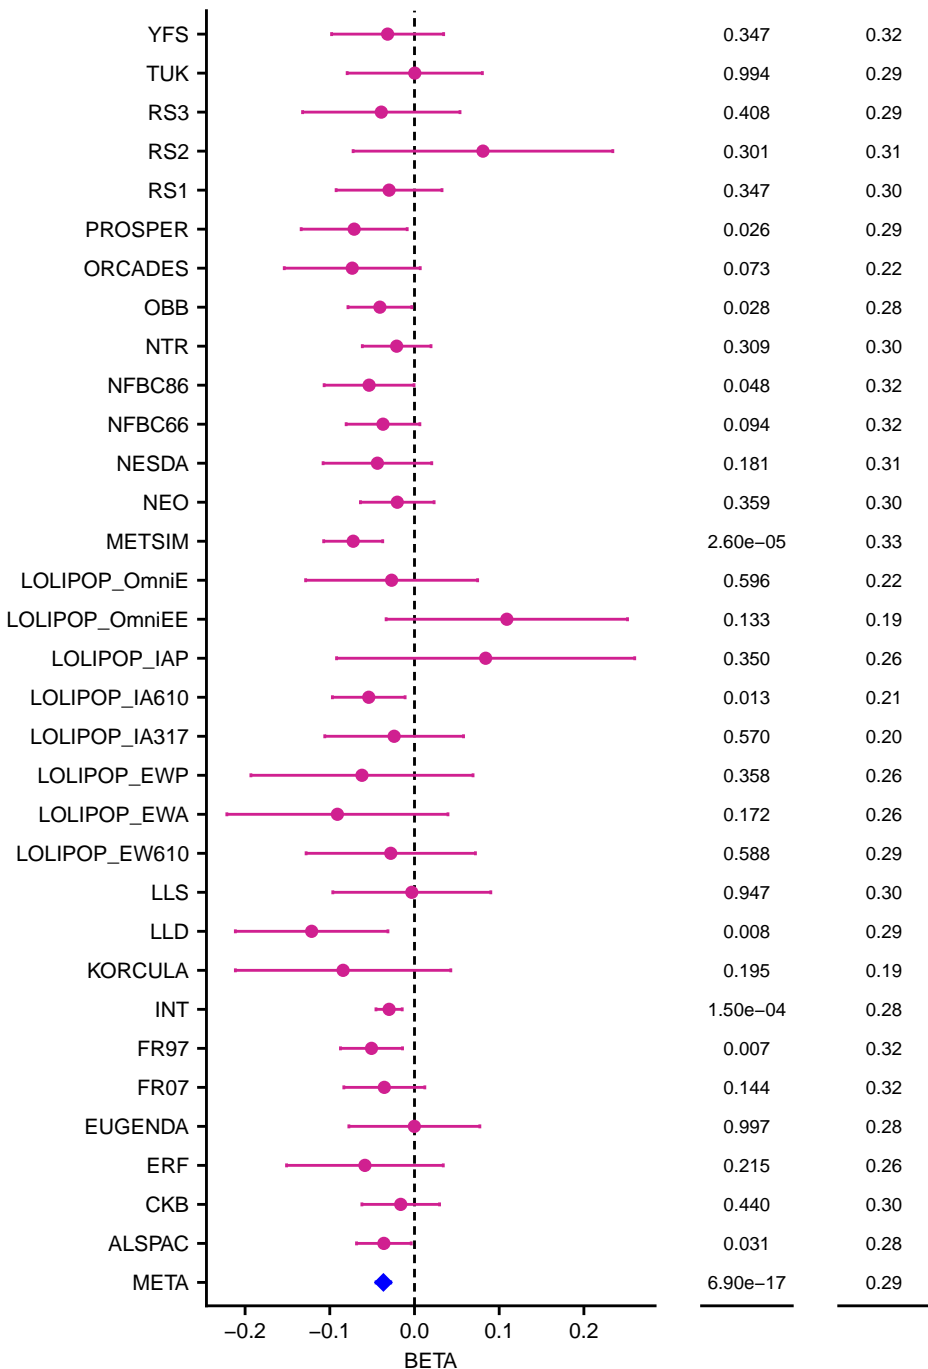

## chr8:118217915:A Glc

P-value

EAF

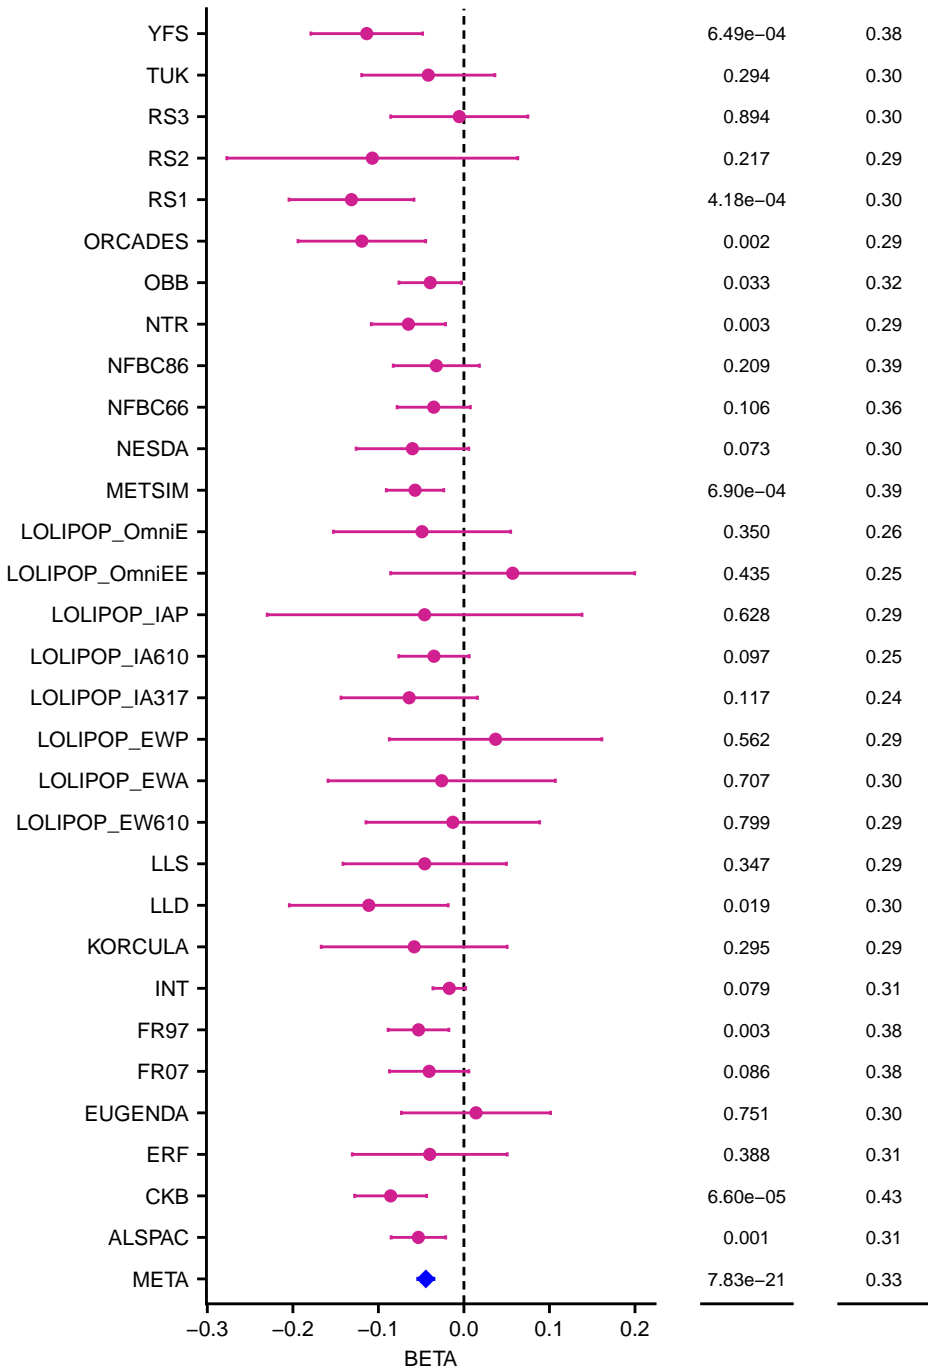

## chr8:126482077:A S-VLDL-PL

P-value

EAF

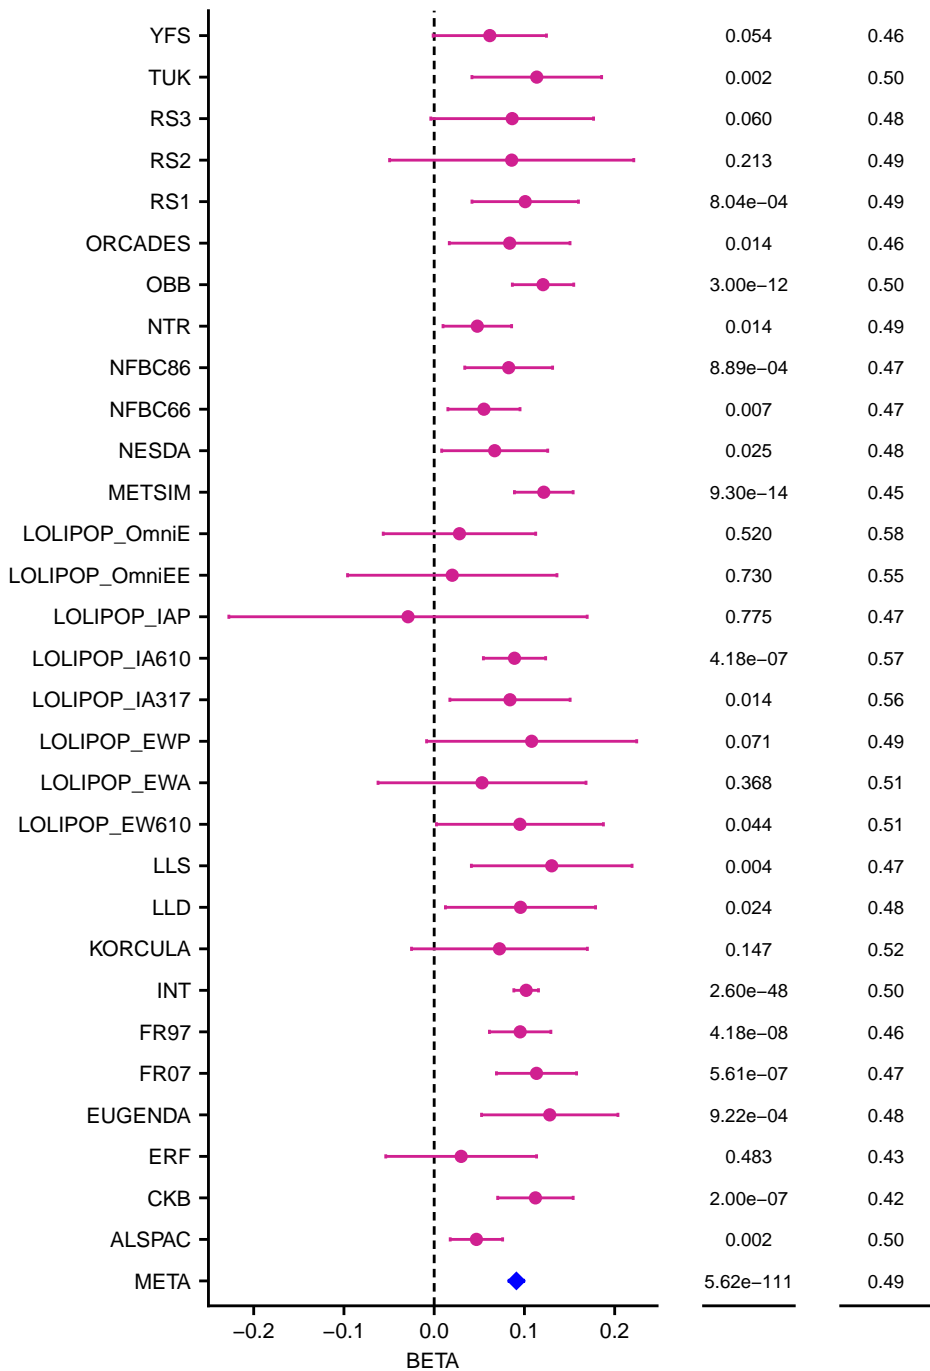

chr8:134332355:T His

P-value

EAF

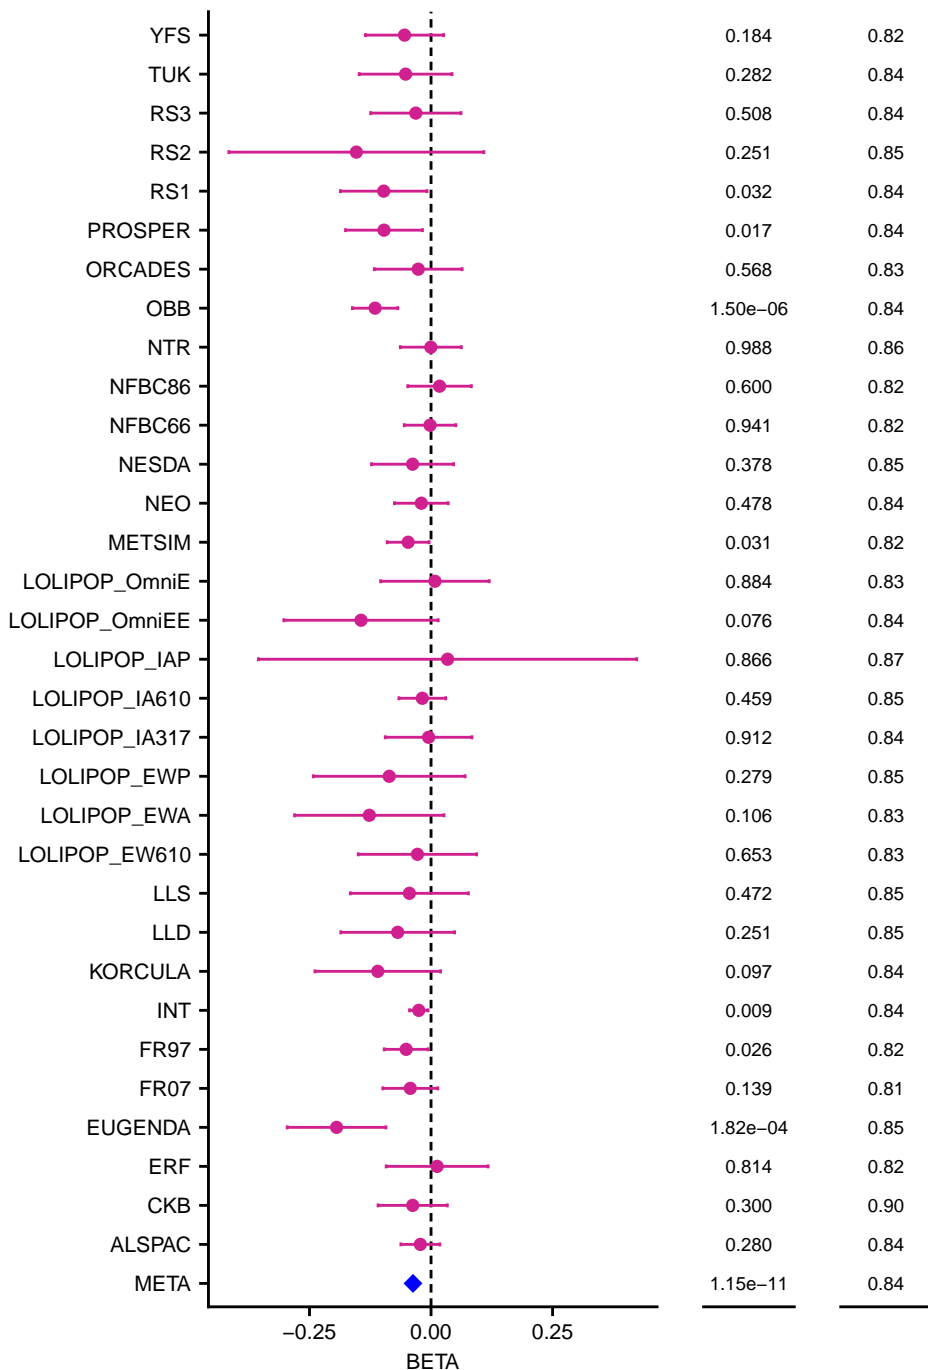

## chr8:145639726:T His

P-value

EAF

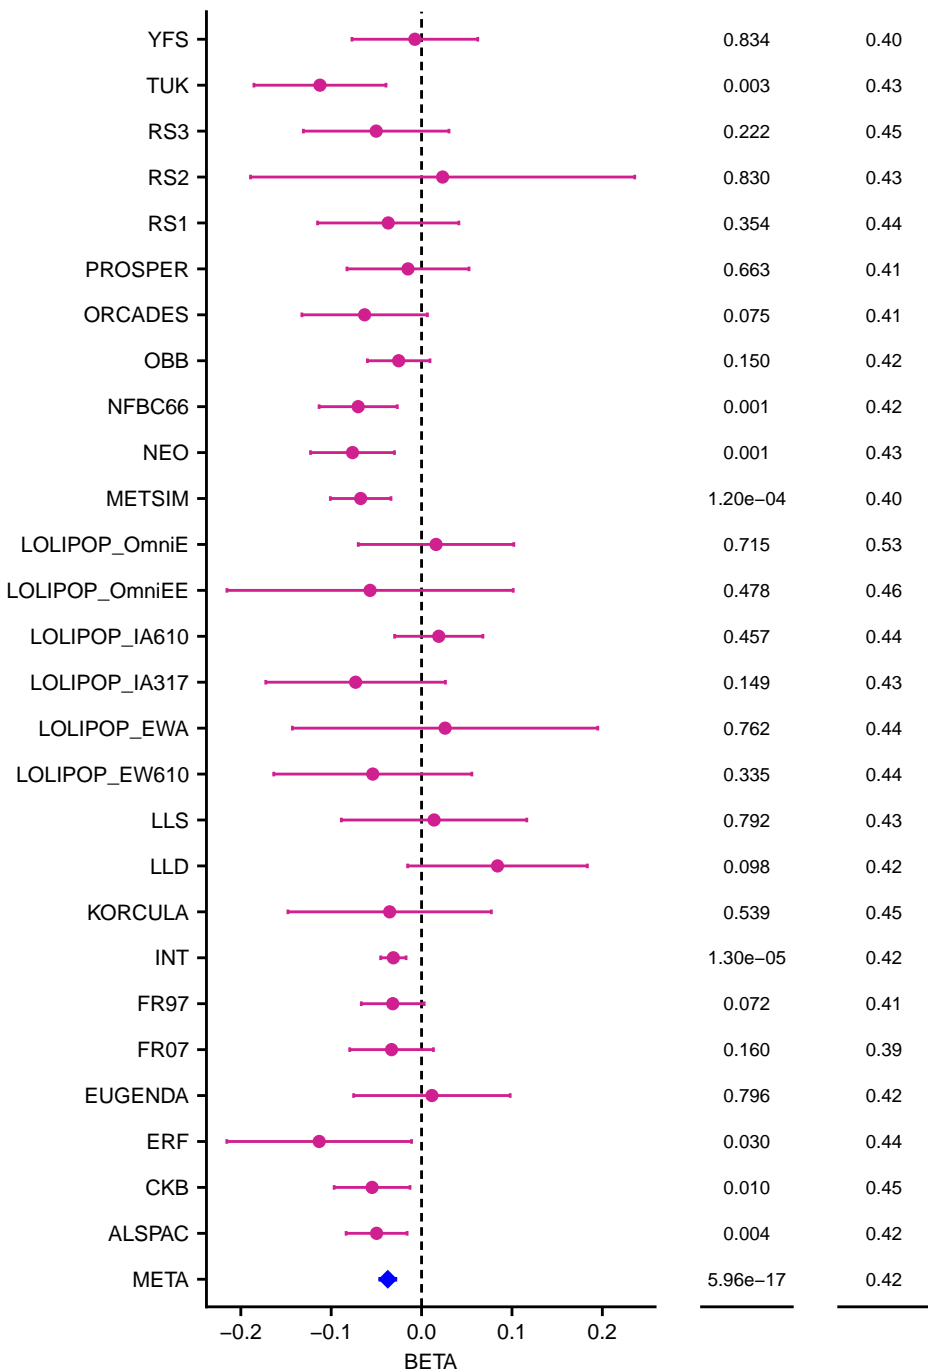

chr9:6533092:C Gly

P-value

EAF

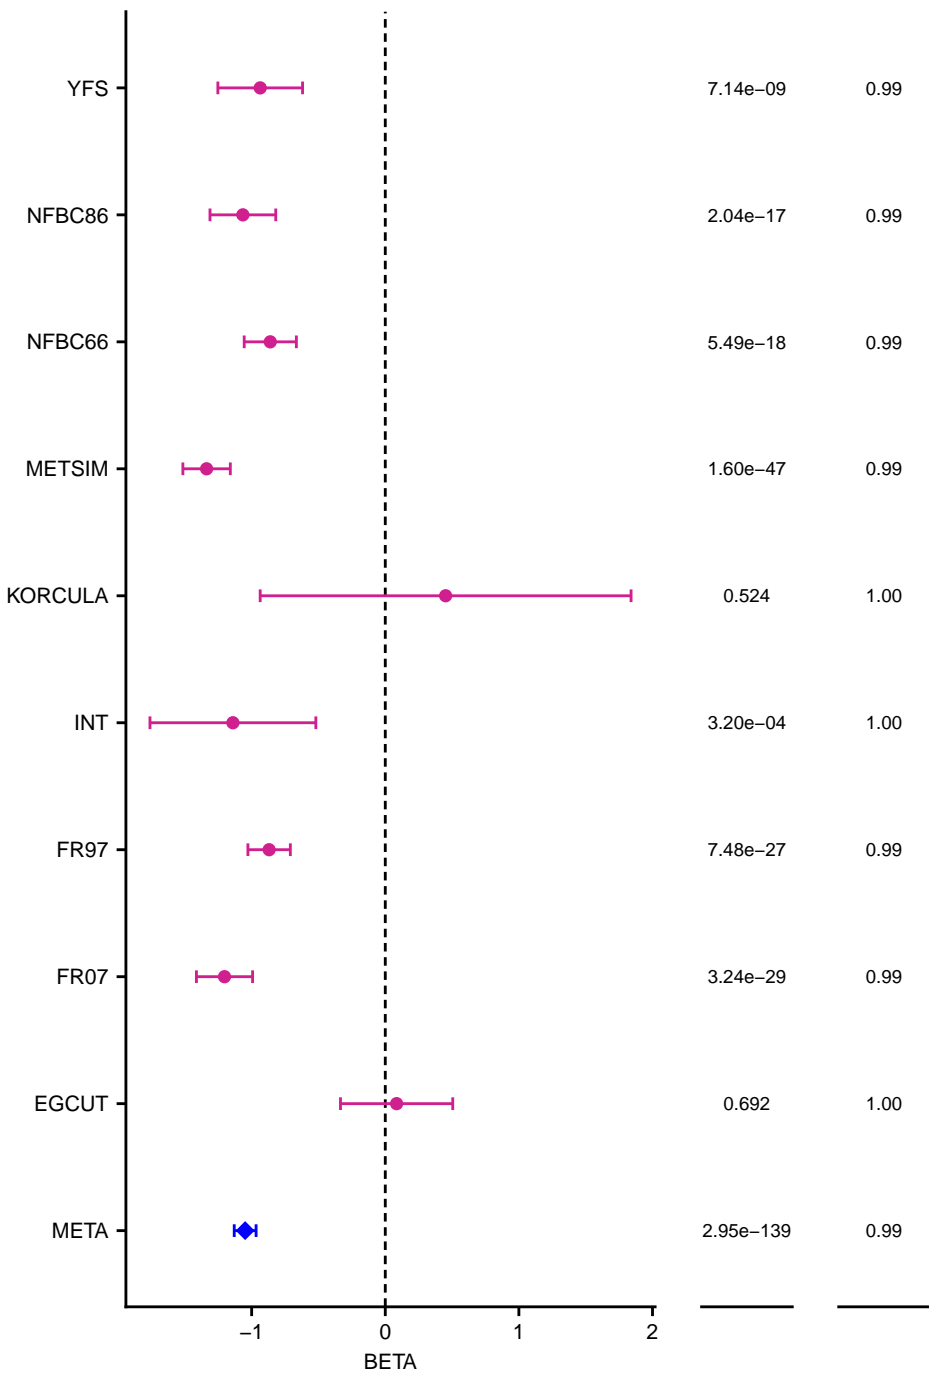

## chr9:15304782:A HDL3-C

P-value

EAF

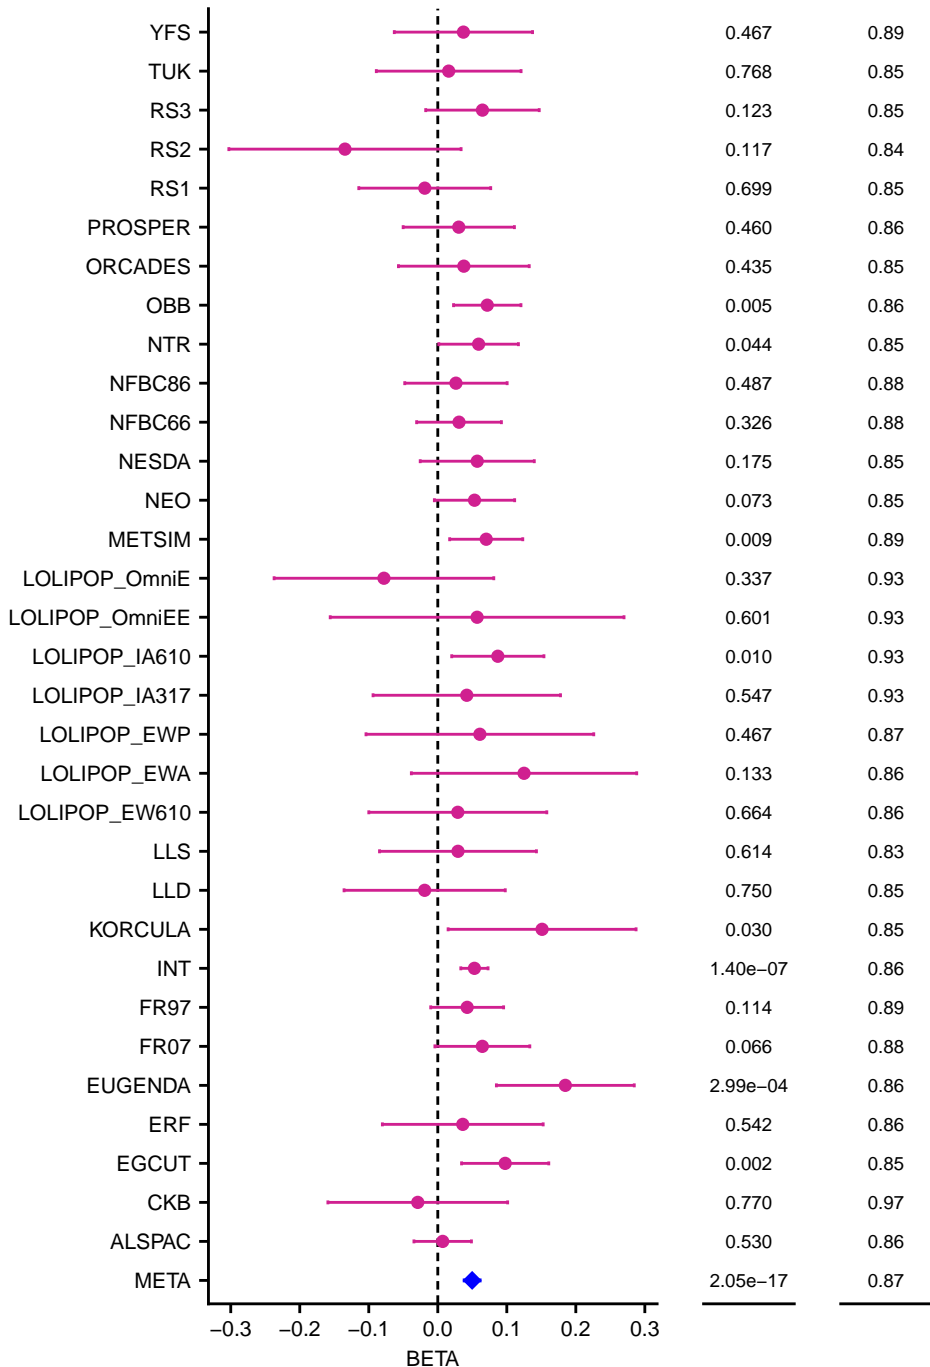

## chr9:16901228:T ApoBbyApoA1

P-value

EAF

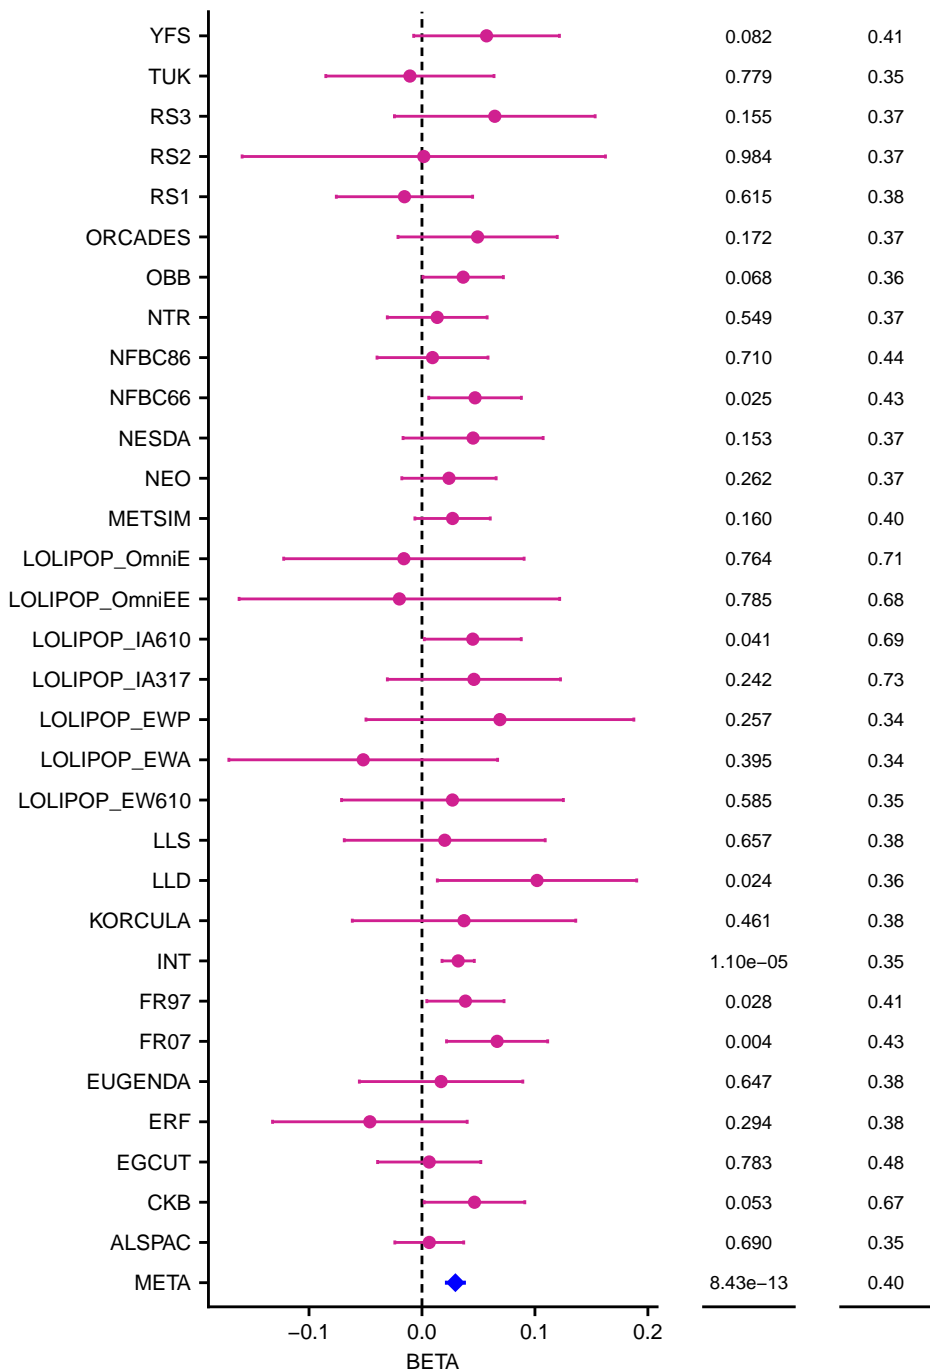



chr9:22133284:A Glc

P-value

EAF

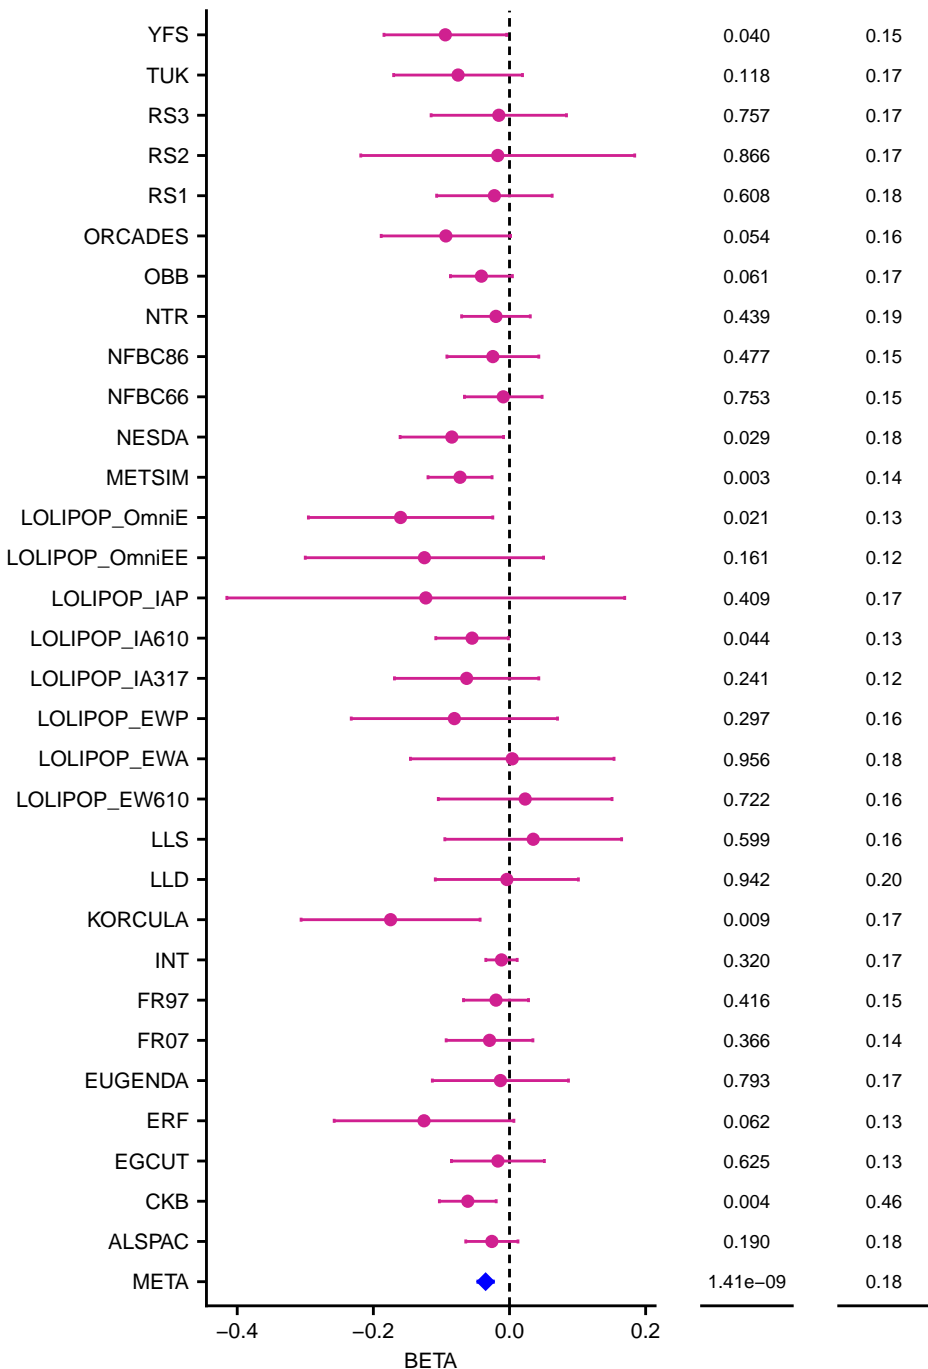

chr9:71558377:A Crea

P-value

EAF

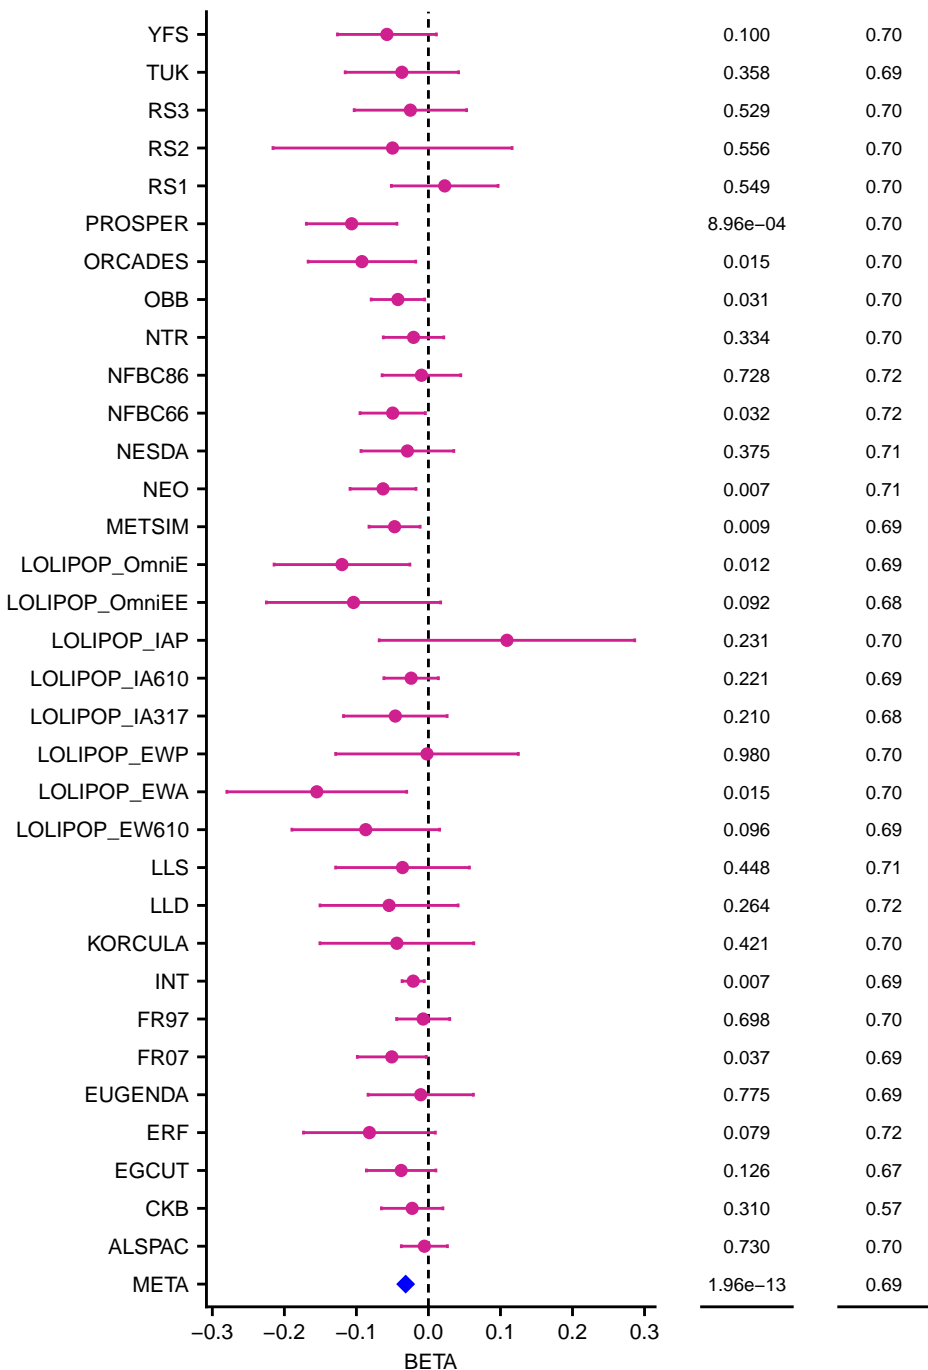

## chr9:92218310:T S-HDL-C\_percent

P-value

EAF

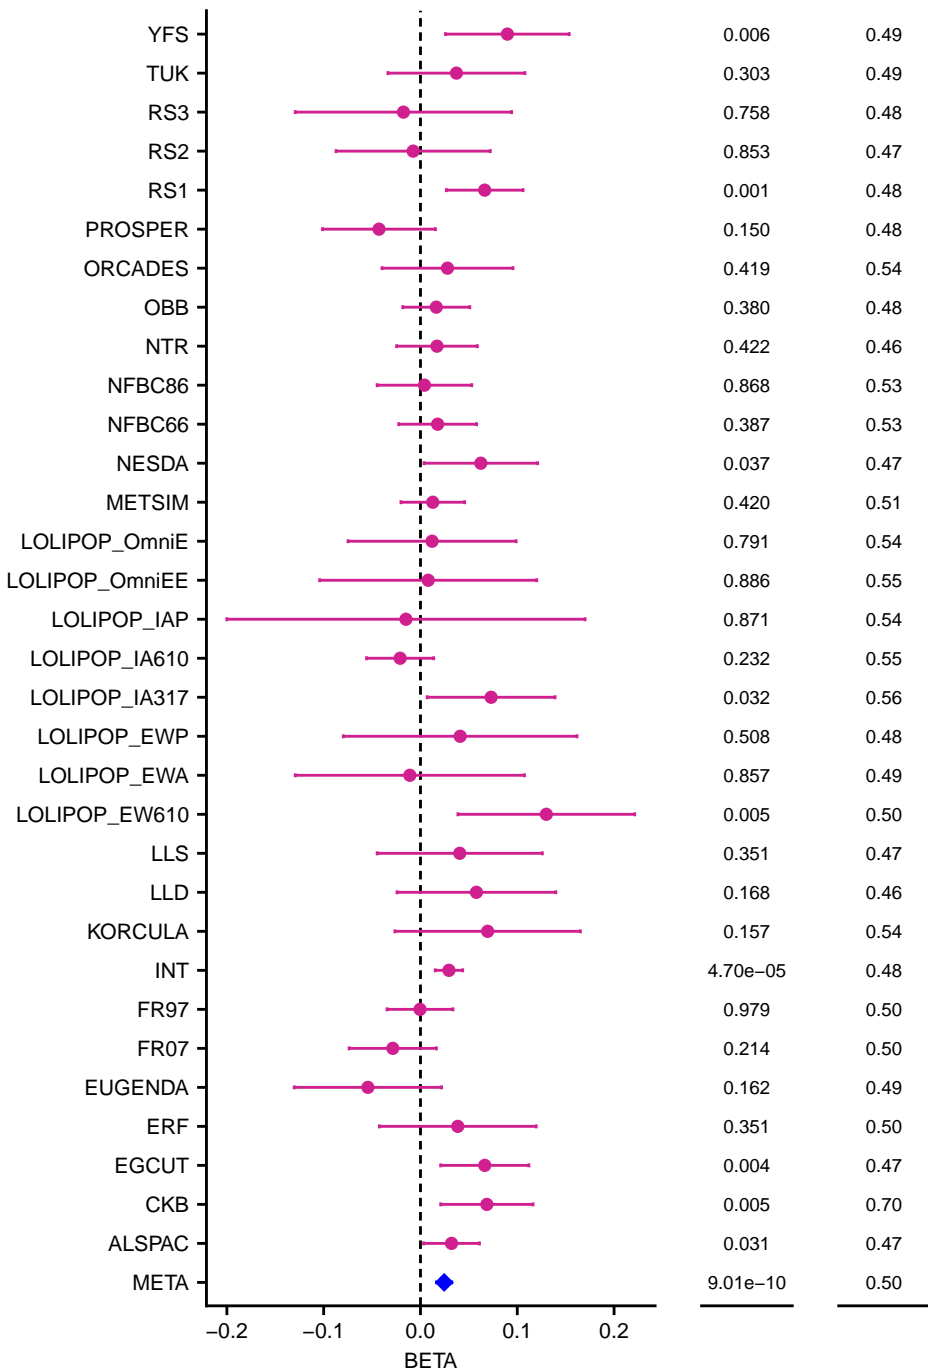

## chr9:107664301:T XL-HDL-CE

P-value

EAF

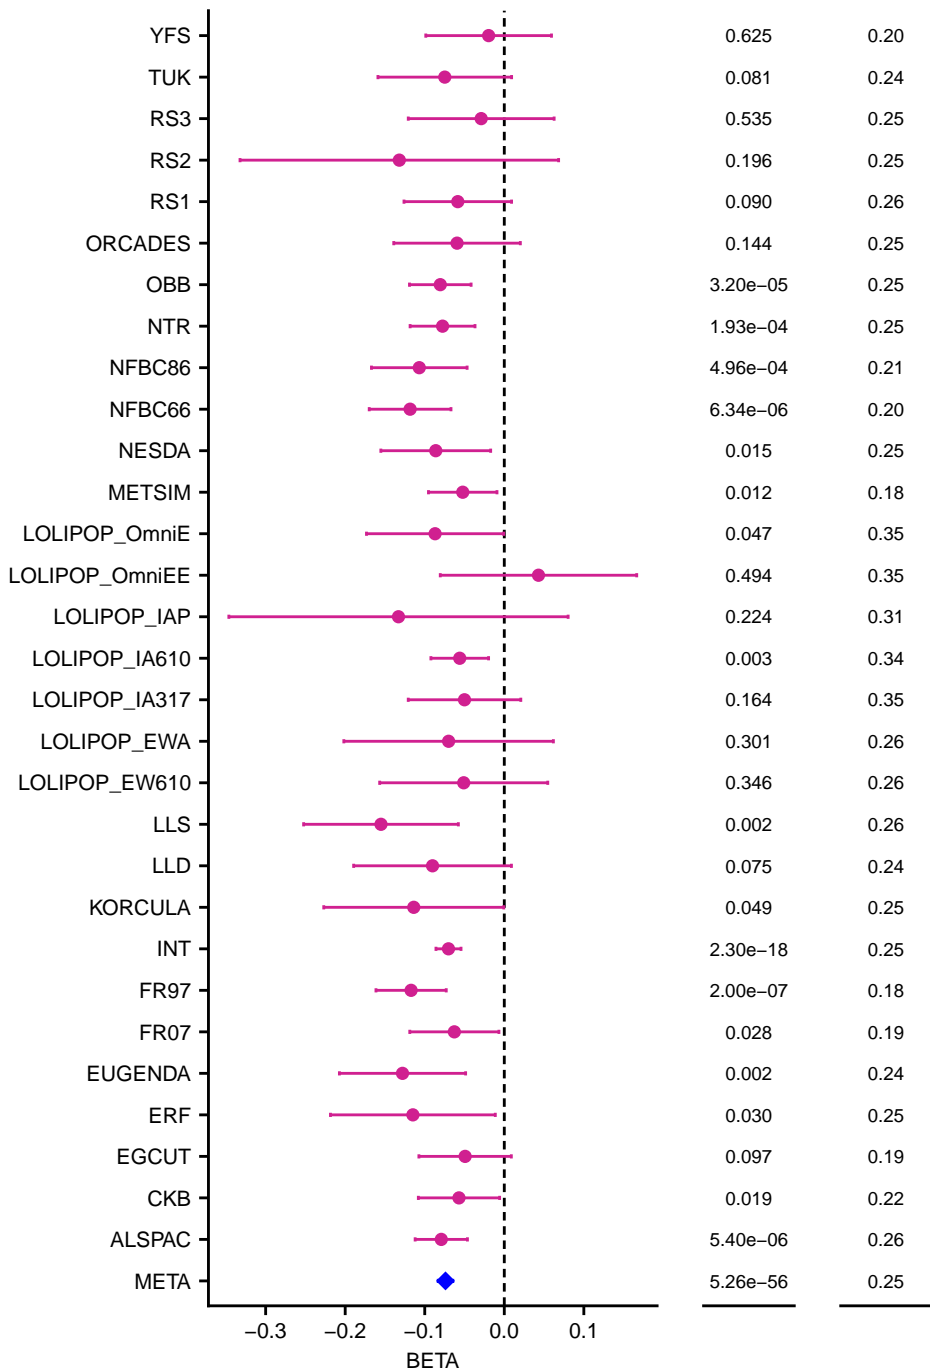

## chr9:117083803:A GlycA

P-value

EAF

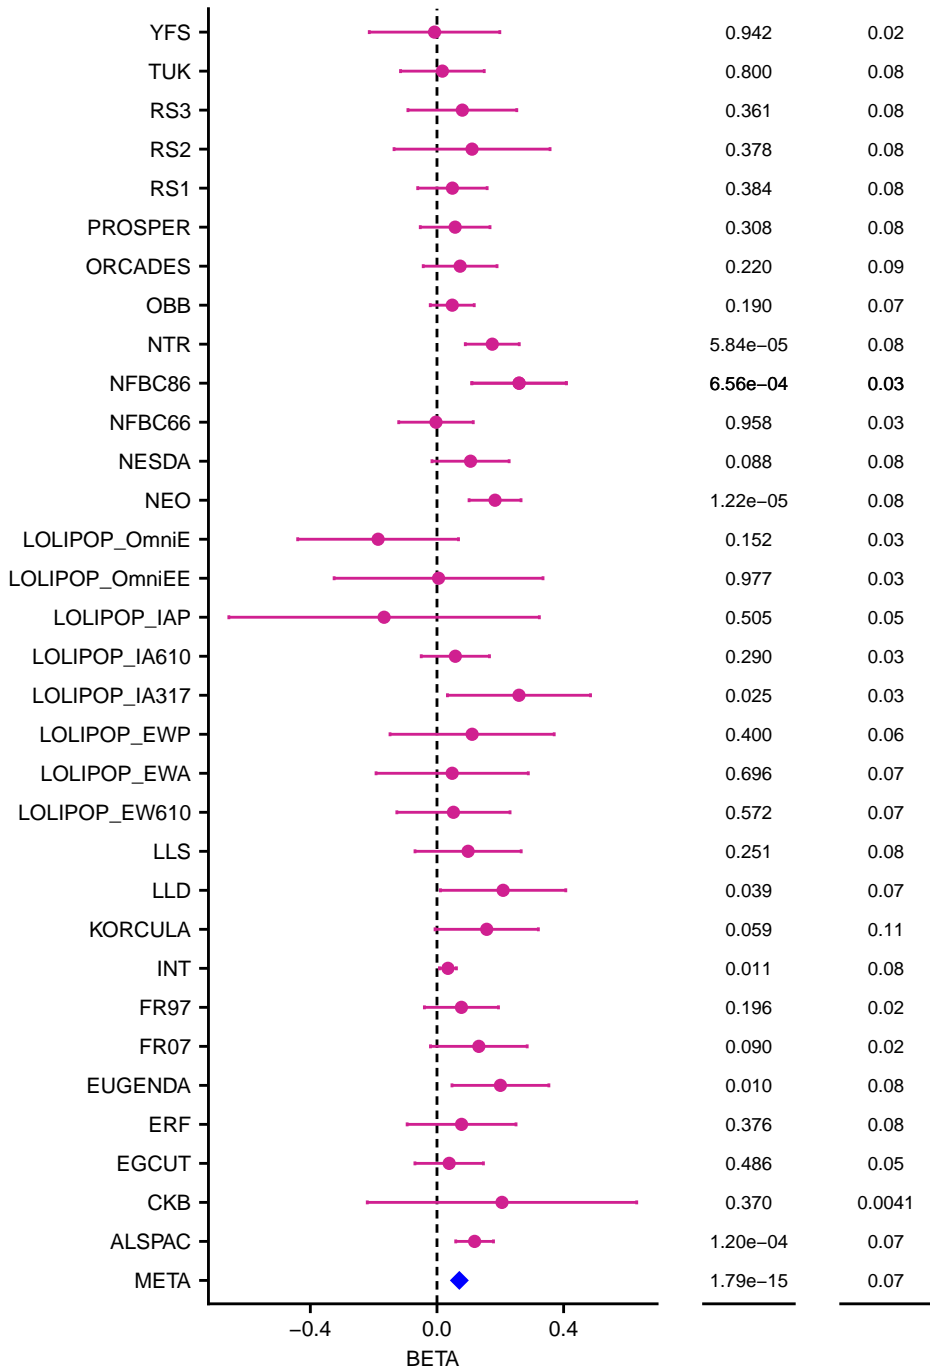

## chr9:131497832:T L-LDL-FC

P-value

EAF

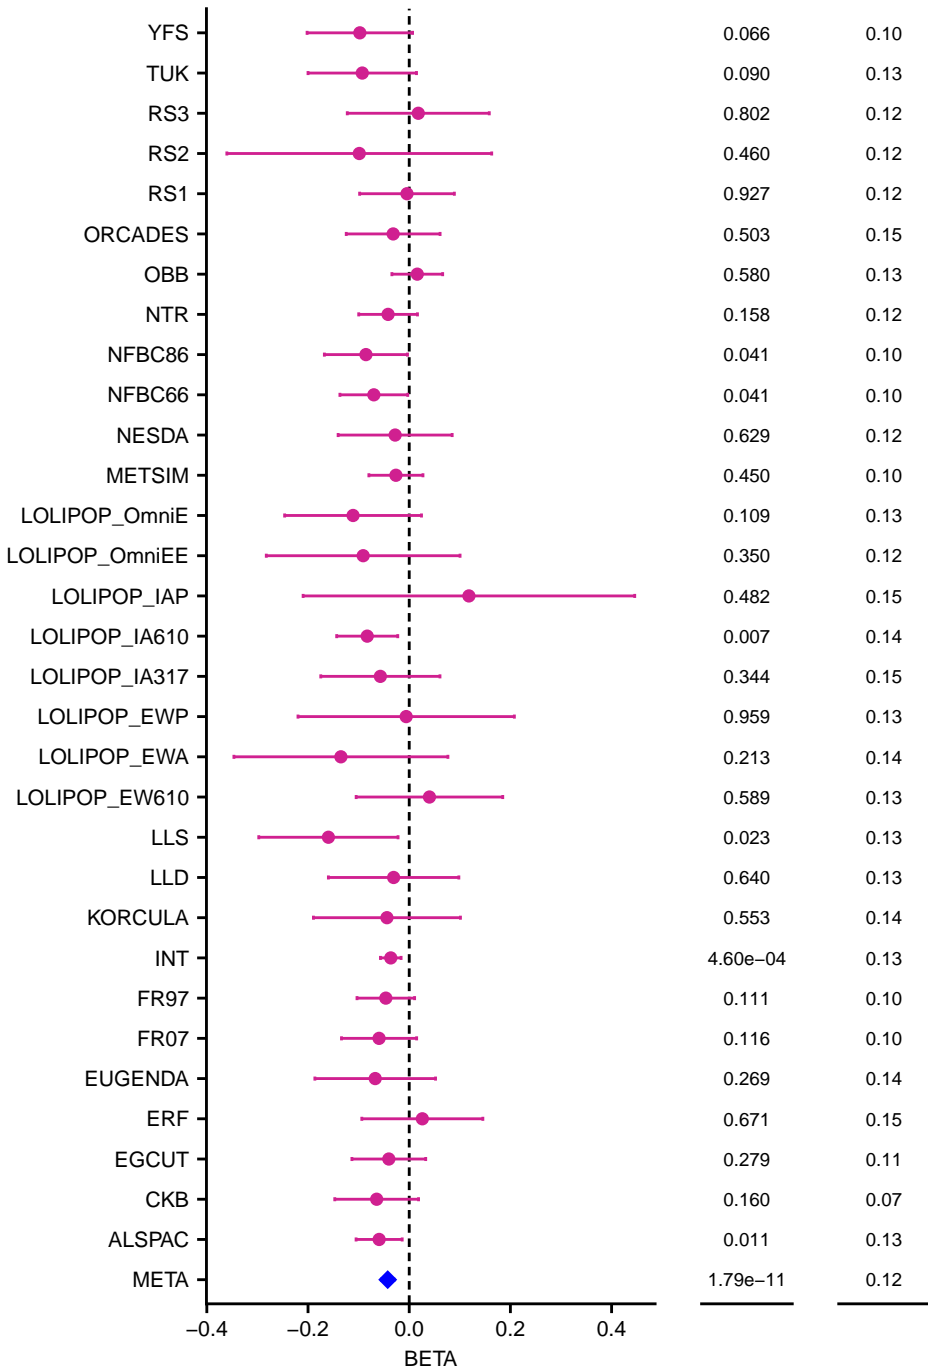

## chr9:136155000:T XS-VLDL-C

P-value

EAF

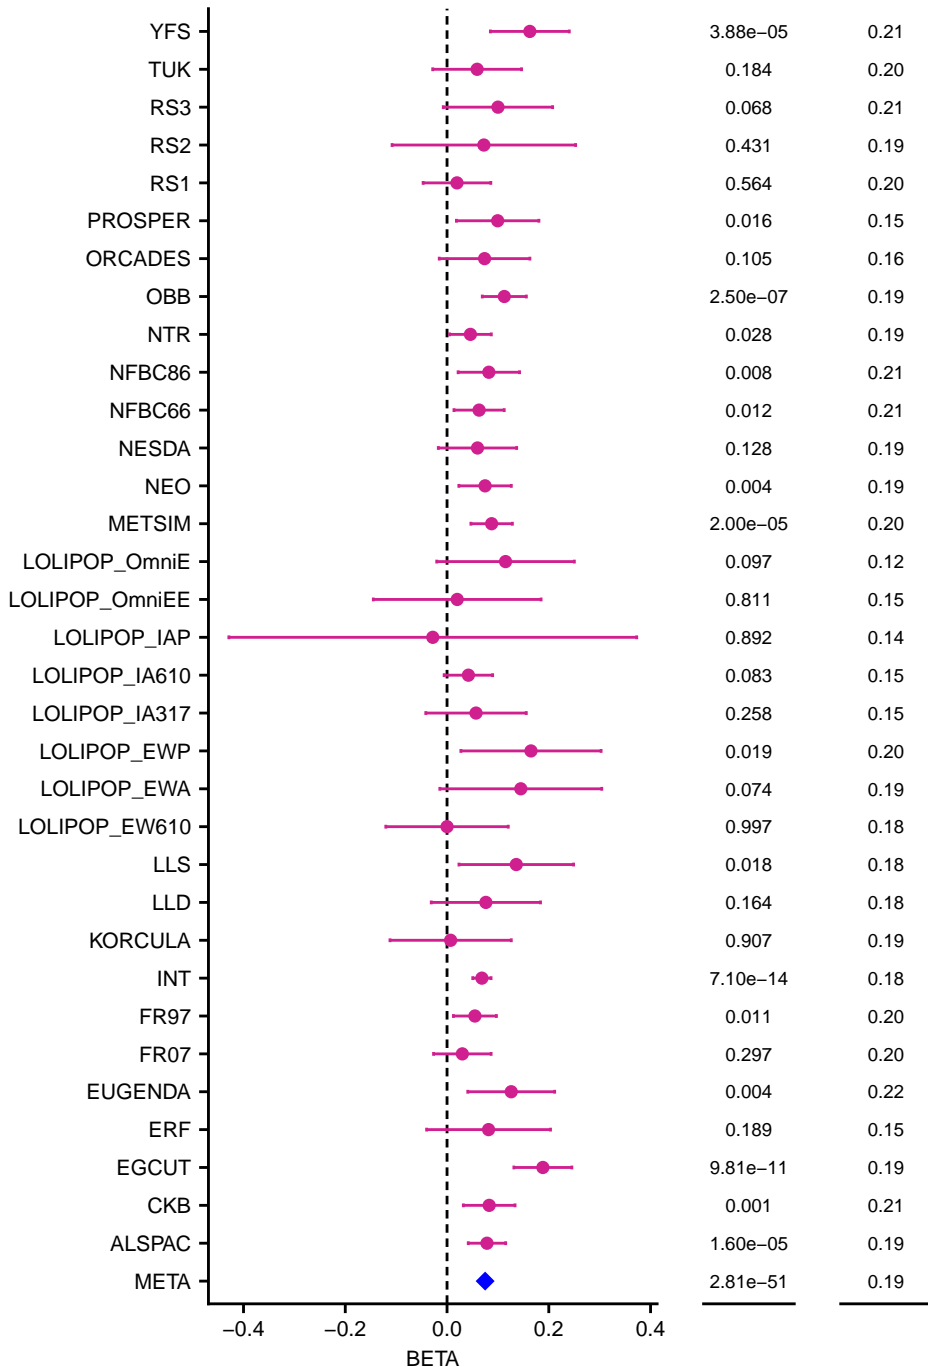

## chr9:140358581:T MUFAbyFA

P-value

EAF

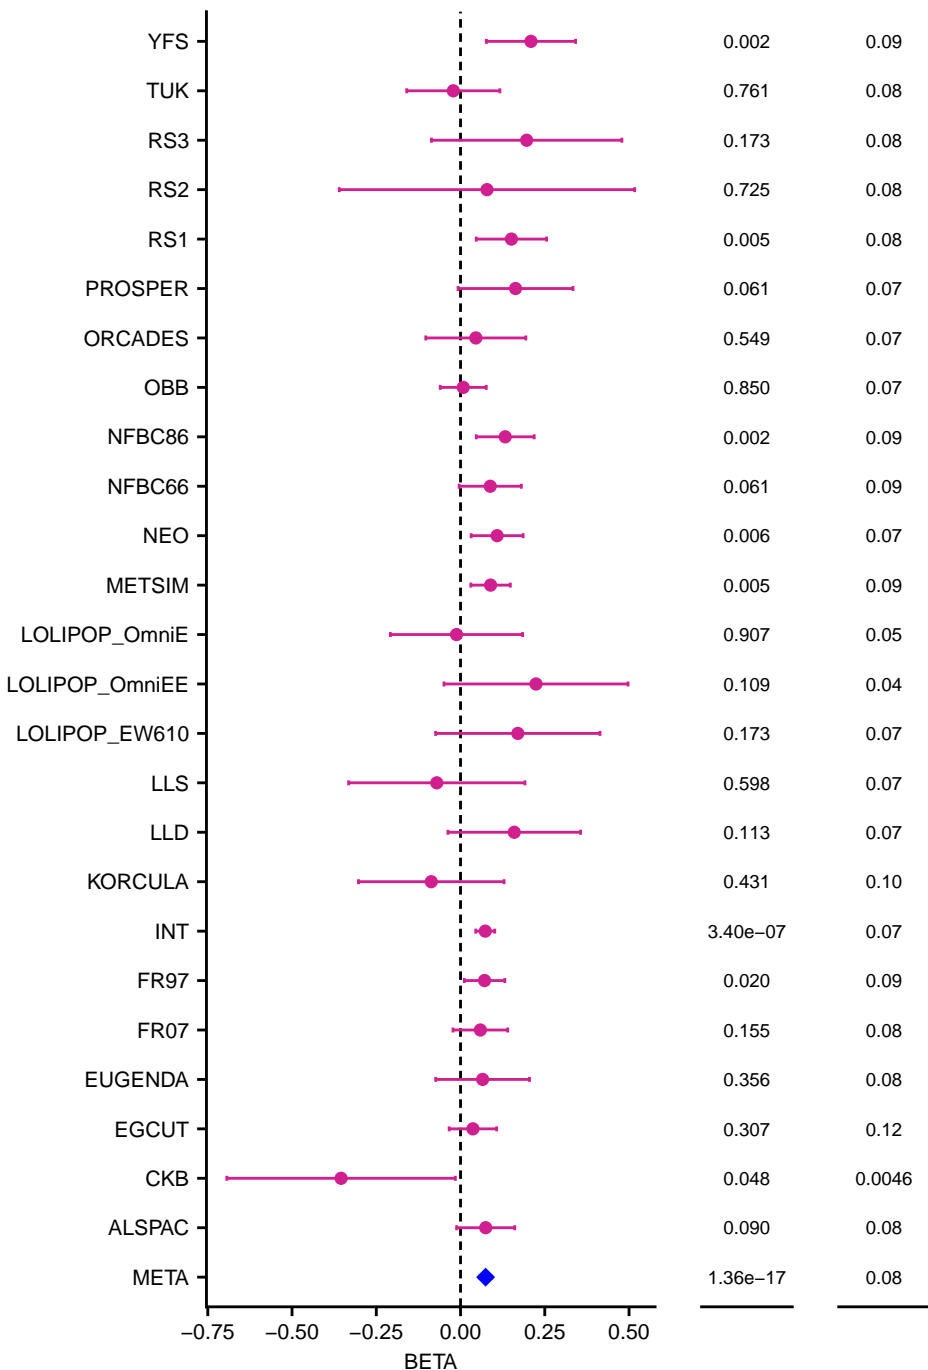



## chr10:899071:A Crea

P-value

EAF

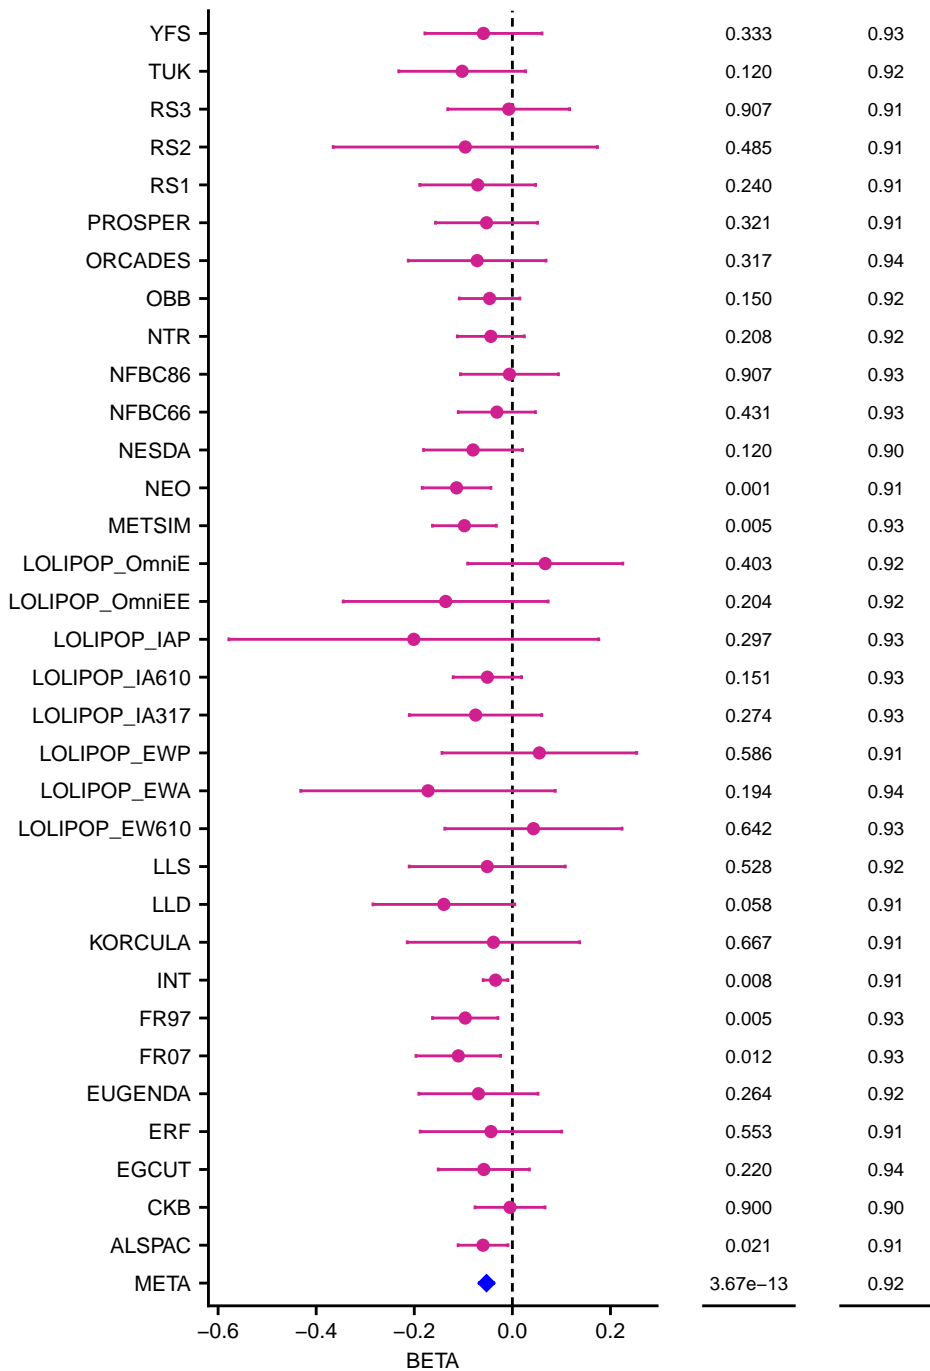

## chr10:3139540:A Lac

P-value

EAF

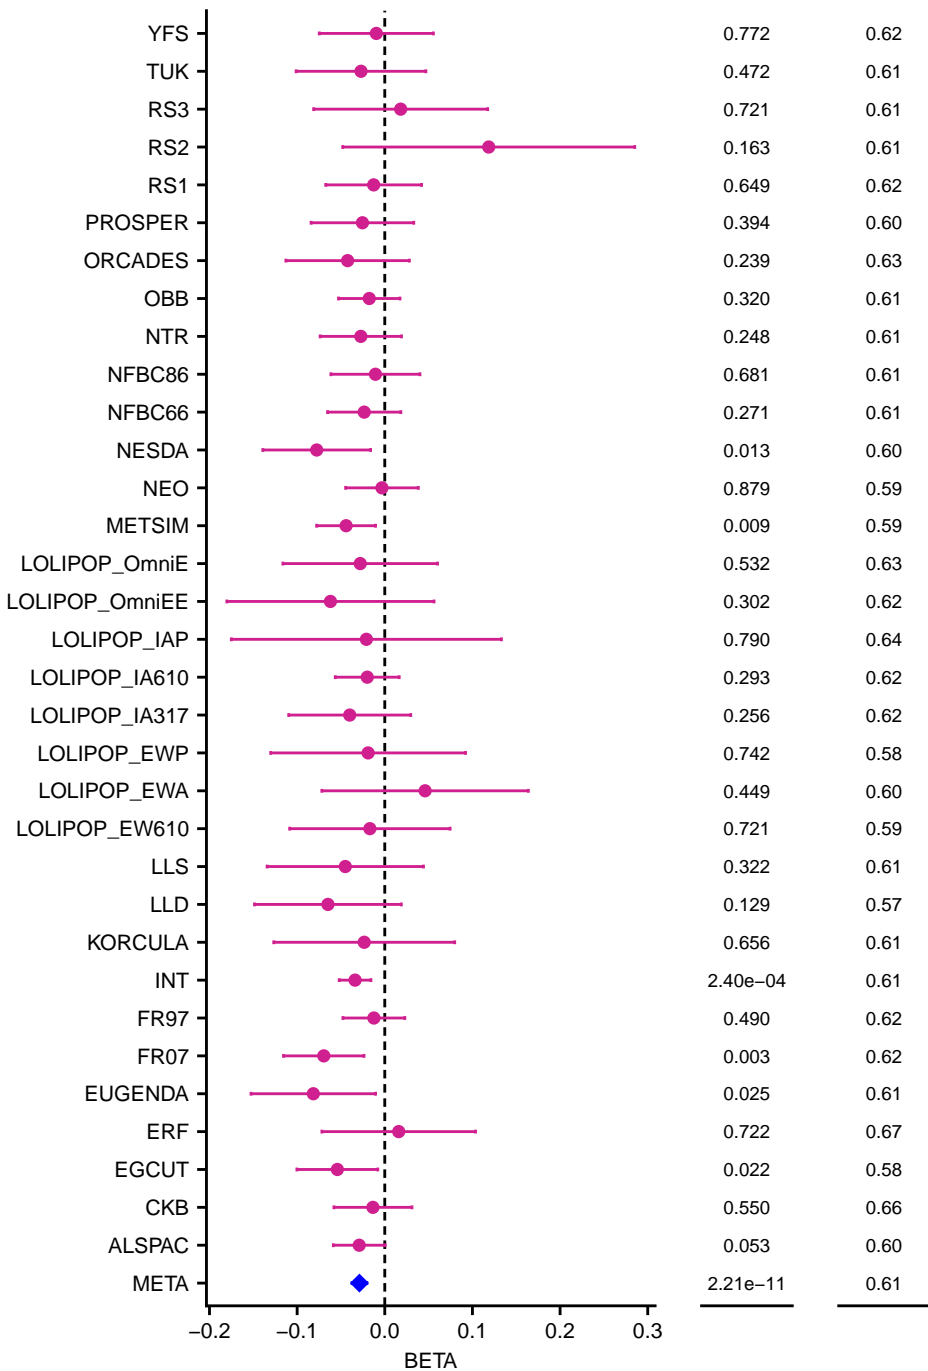

## chr10:5325308:T LAByFA

P-value

EAF

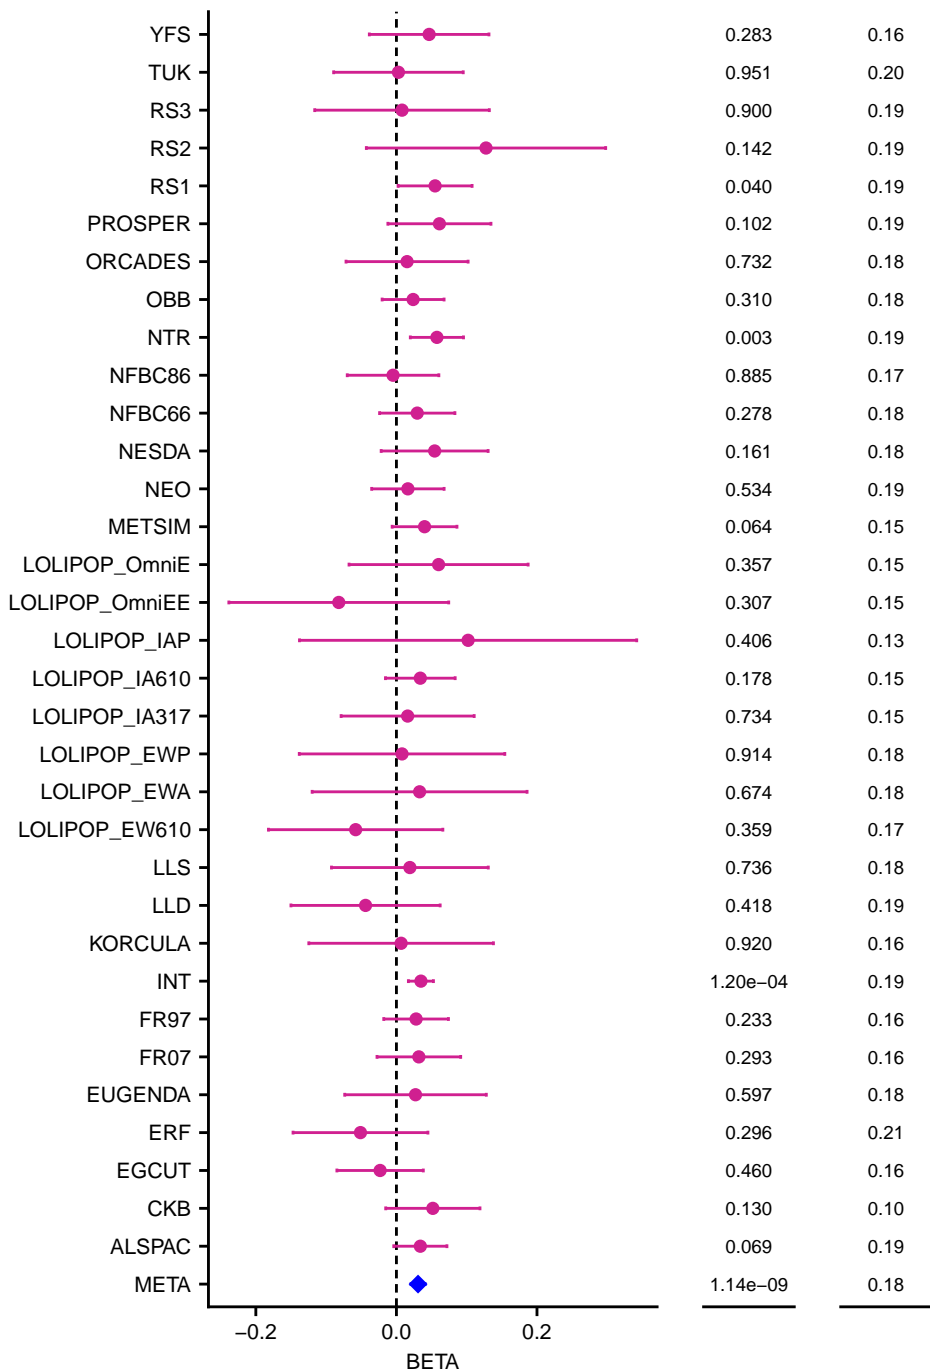

## chr10:16230372:T XL-HDL-PL

P-value

EAF

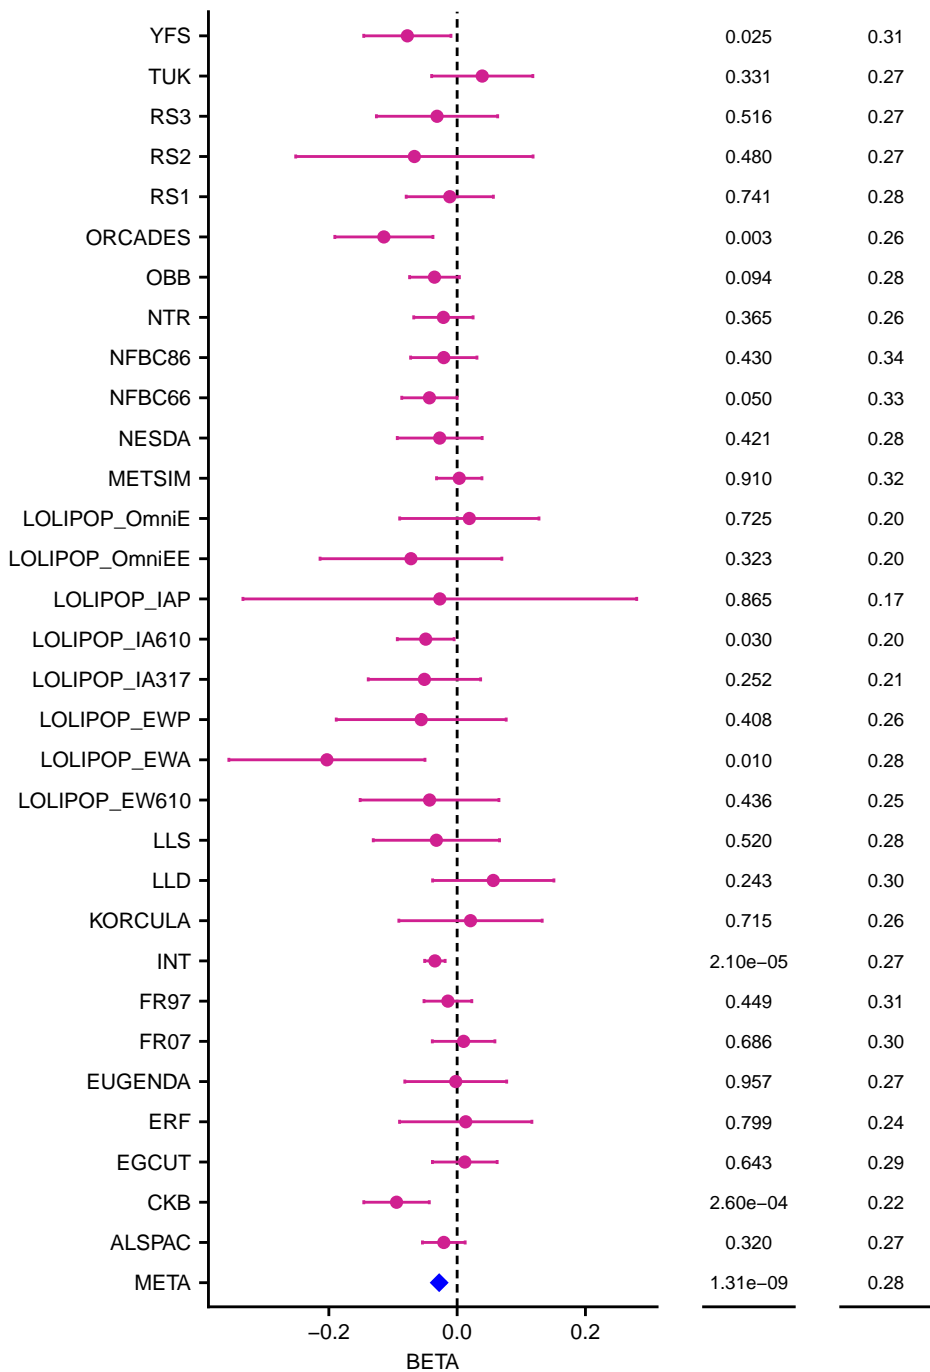

chr10:46021631:T ApoA1

P-value

EAF

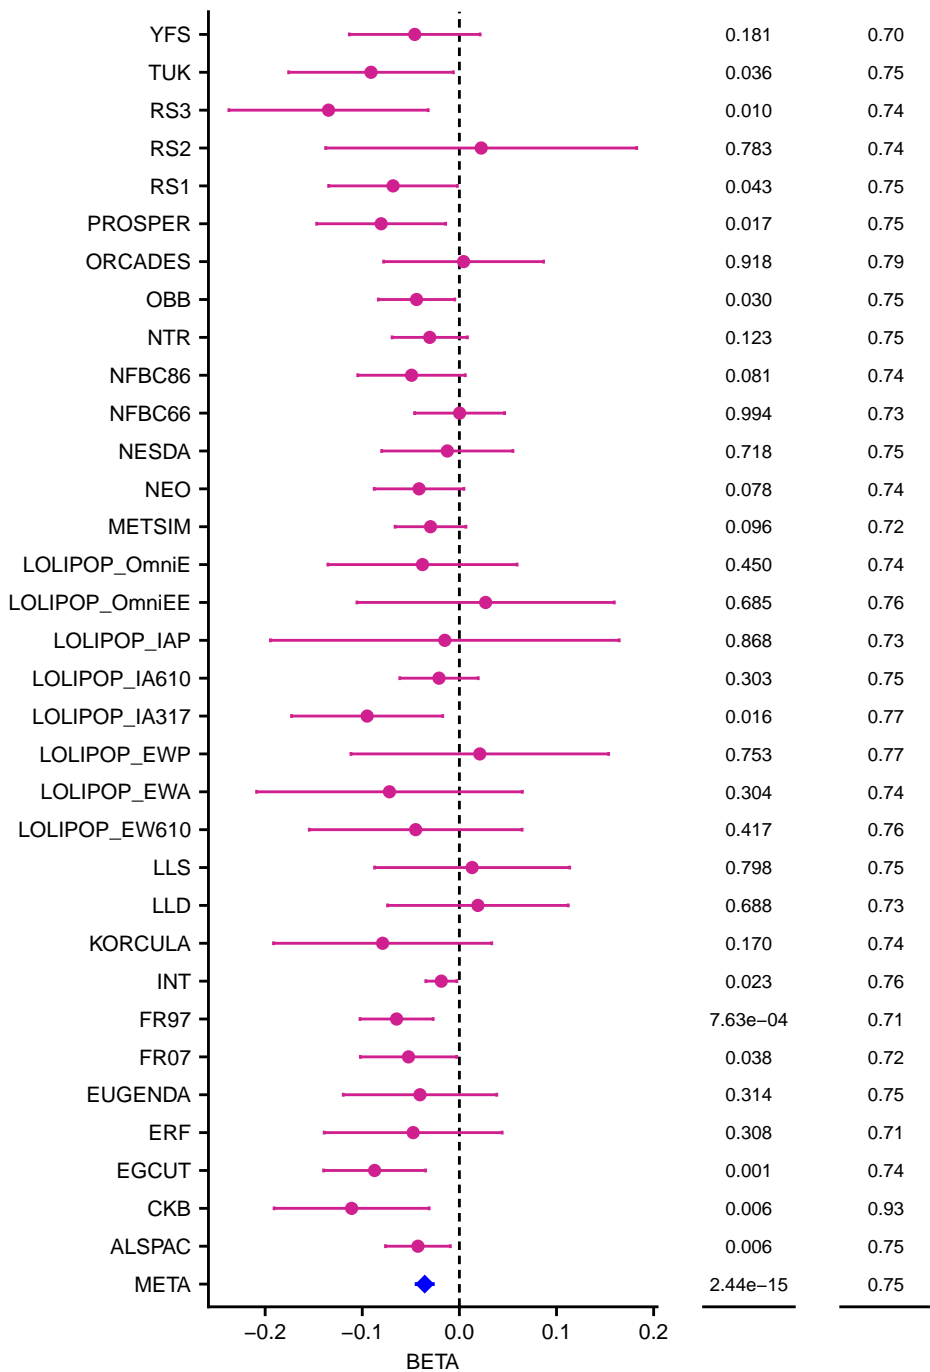

chr10:52186368:T IDL-C\_percent

P-value

EAF

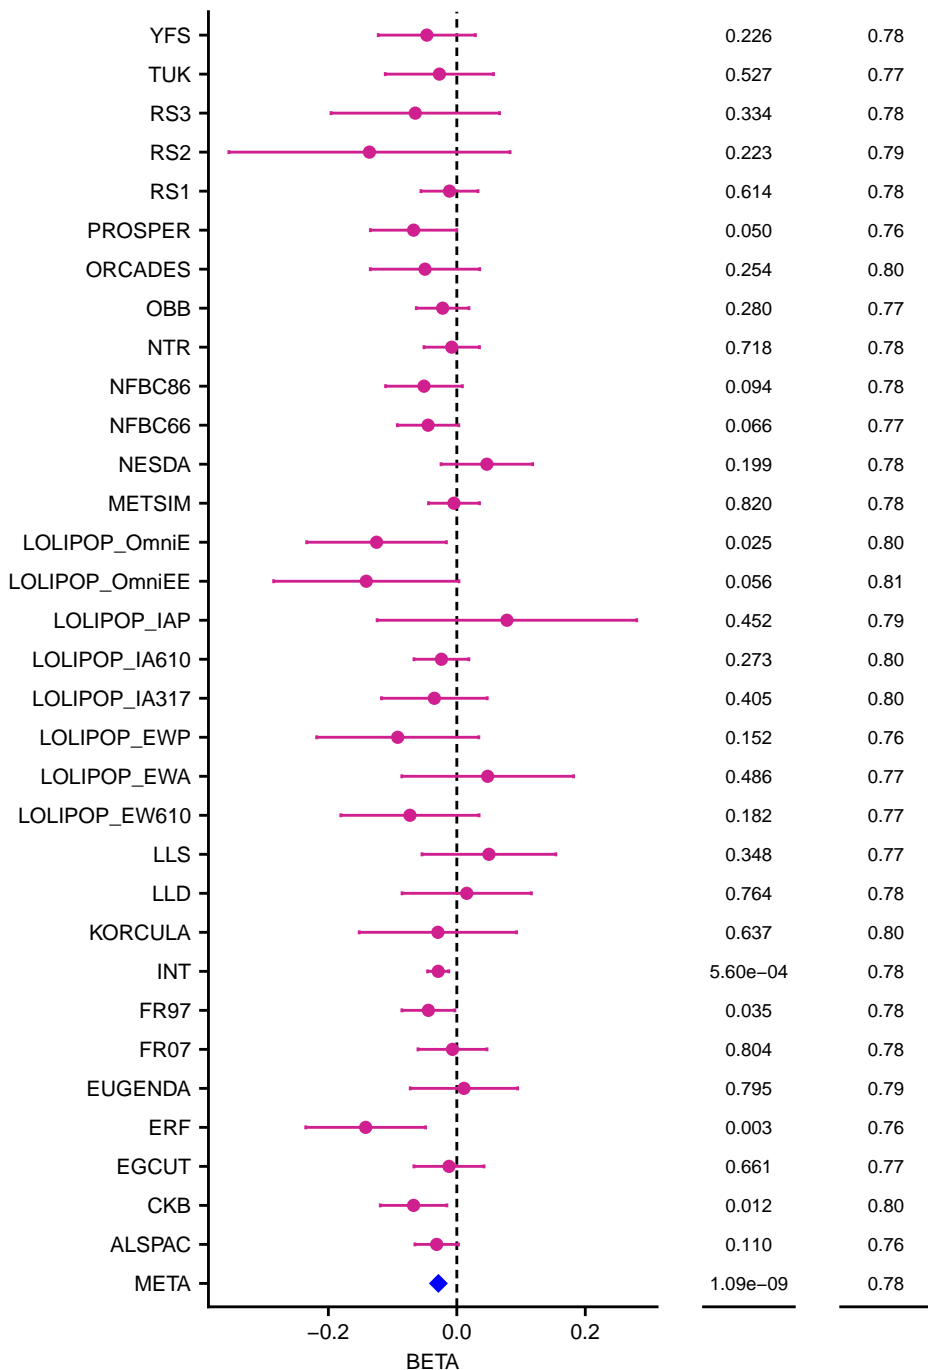

chr10:65313819:A S-VLDL-TG\_percent

P-value

EAF

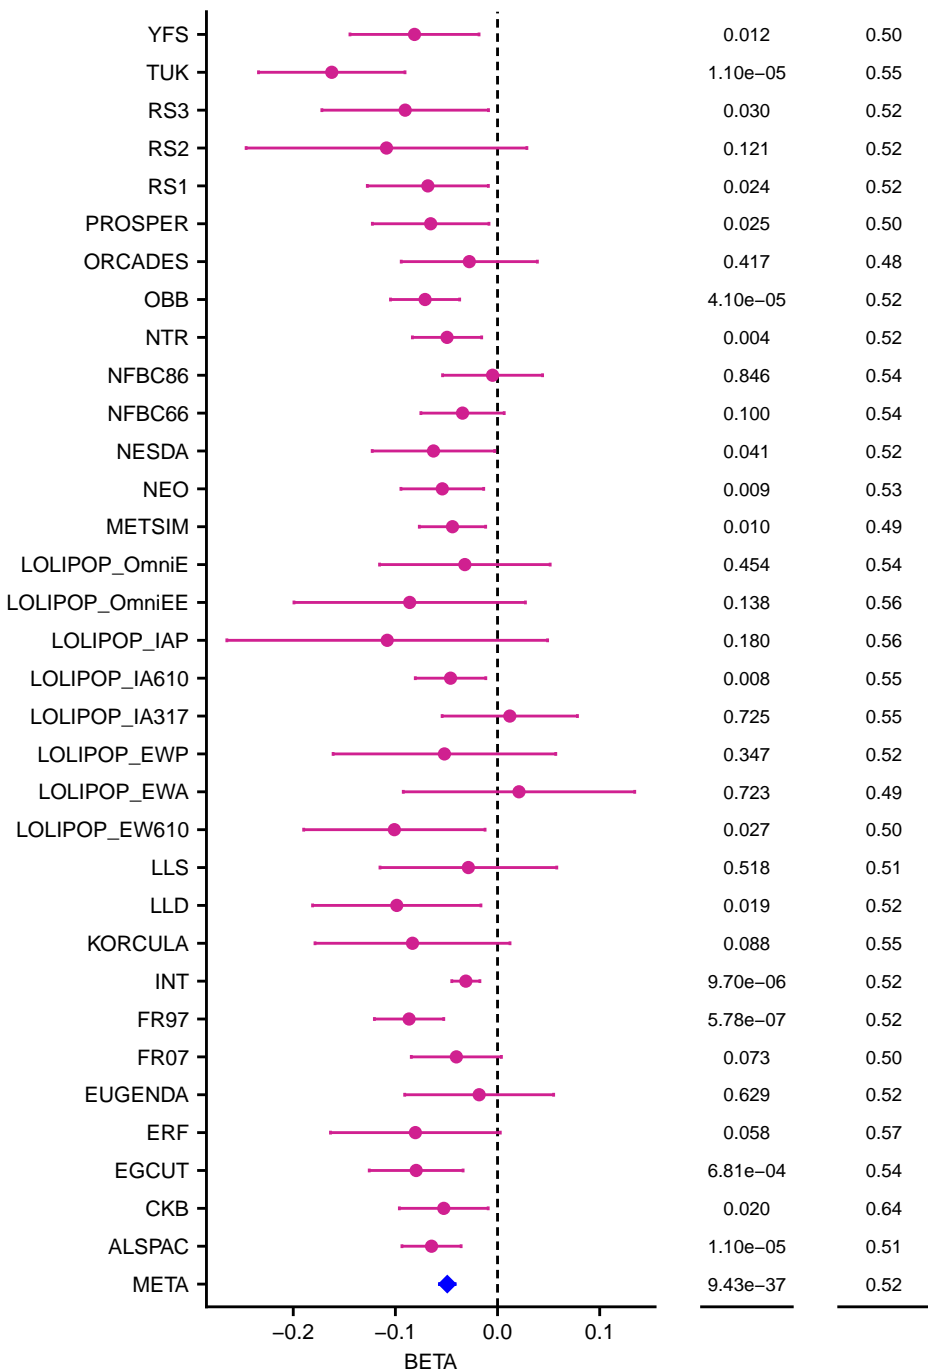

chr10:74067286:T Val

P-value

EAF

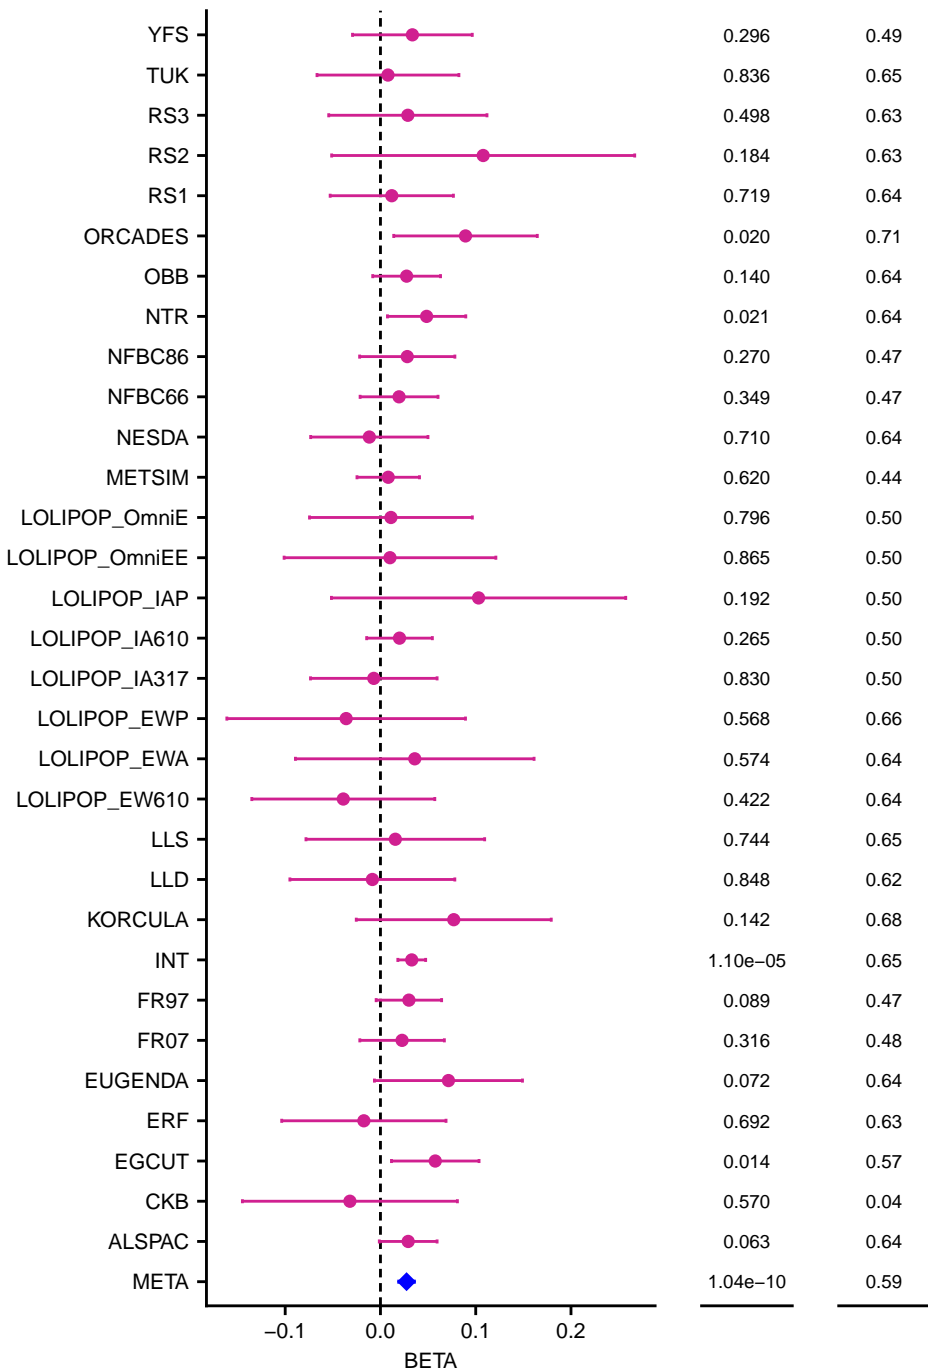



chr10:88820592:A Val

P-value

EAF

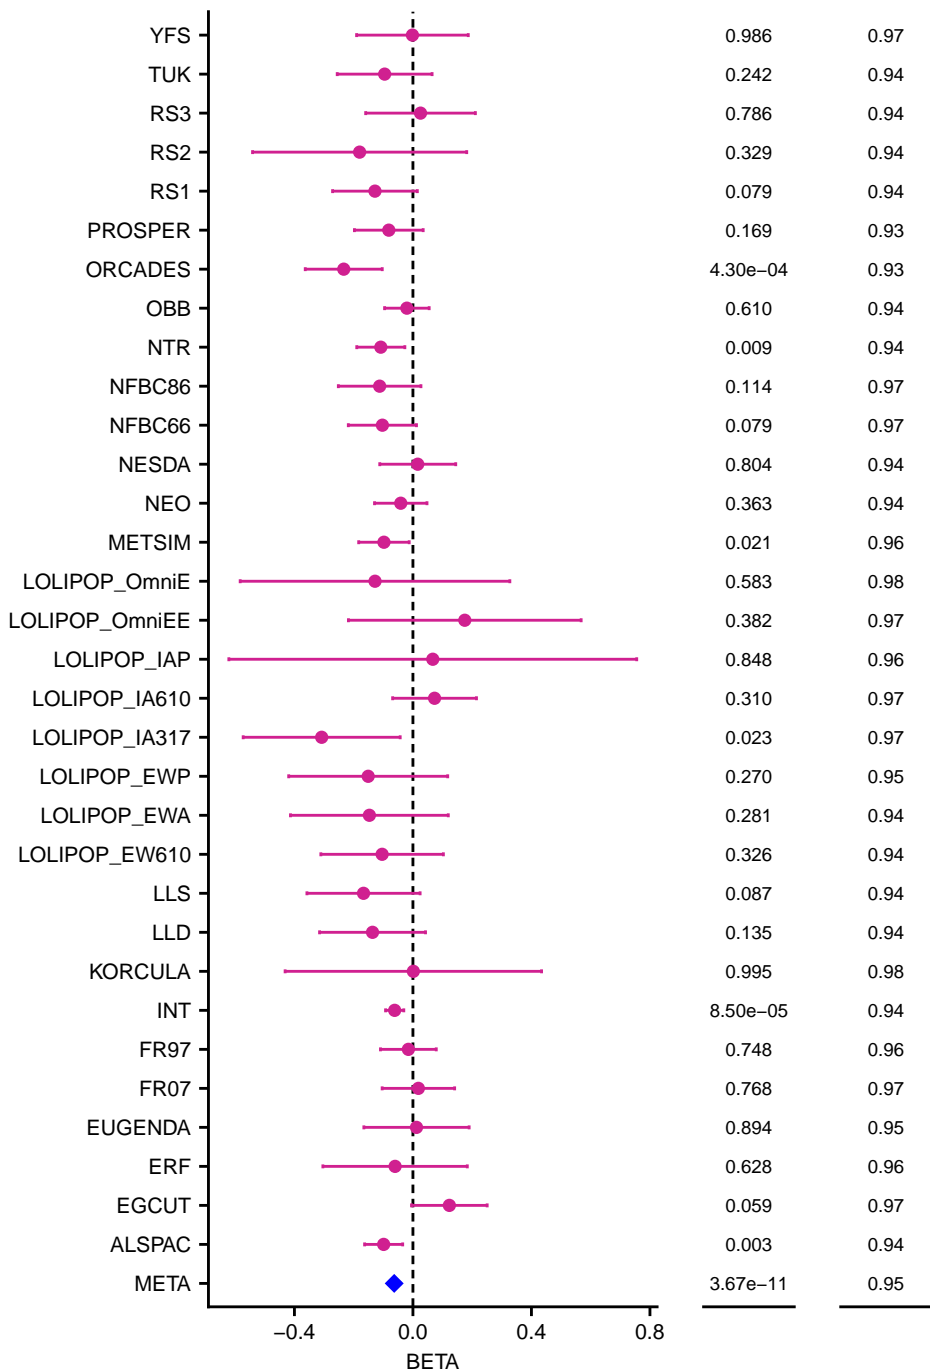

## chr10:94843535:T S-VLDL-L

P-value

EAF

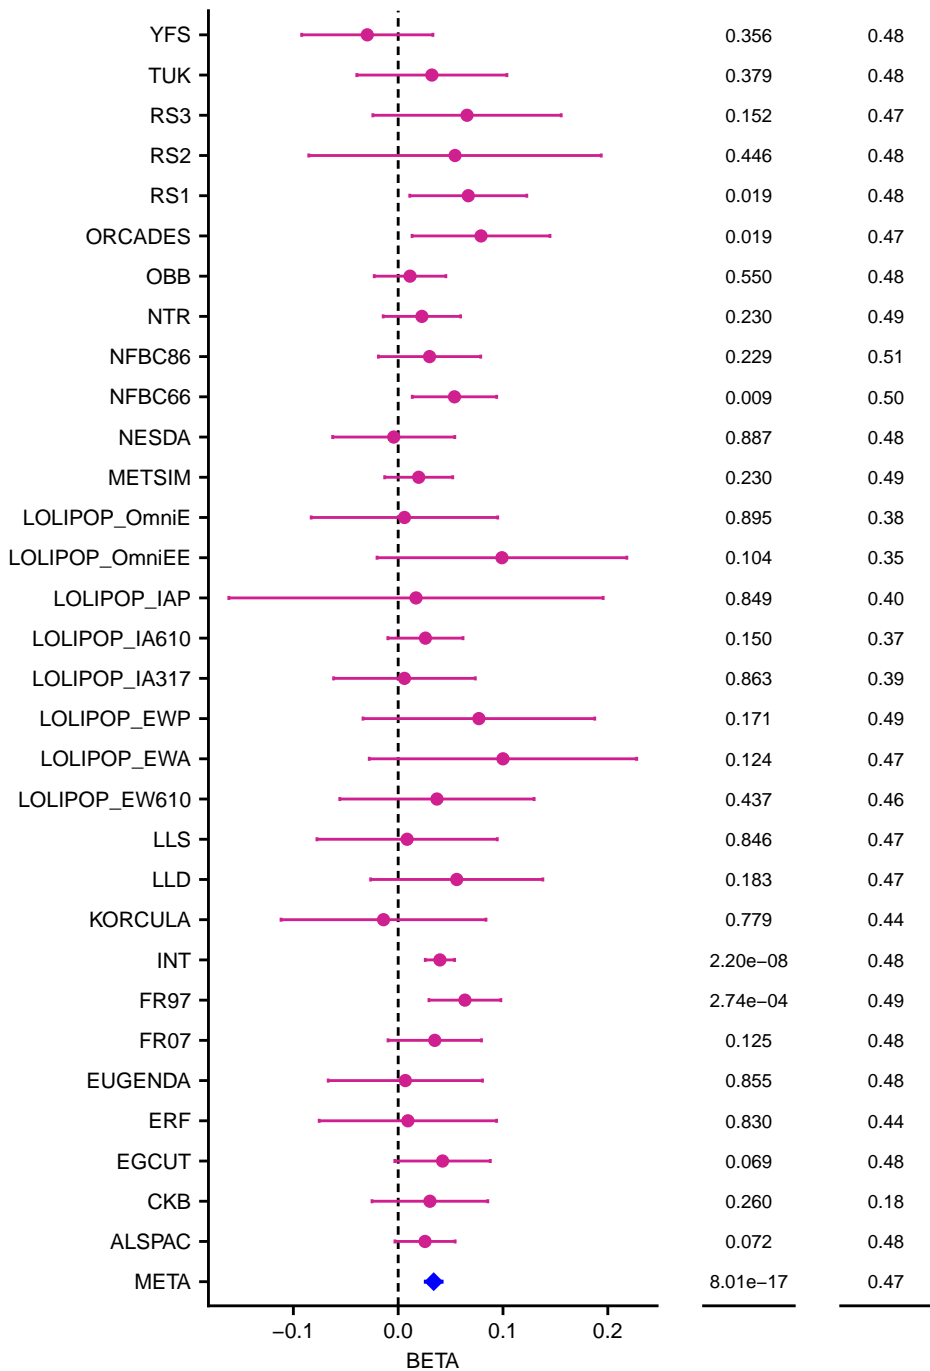

## chr10:99359412:T Gln

P-value

EAF

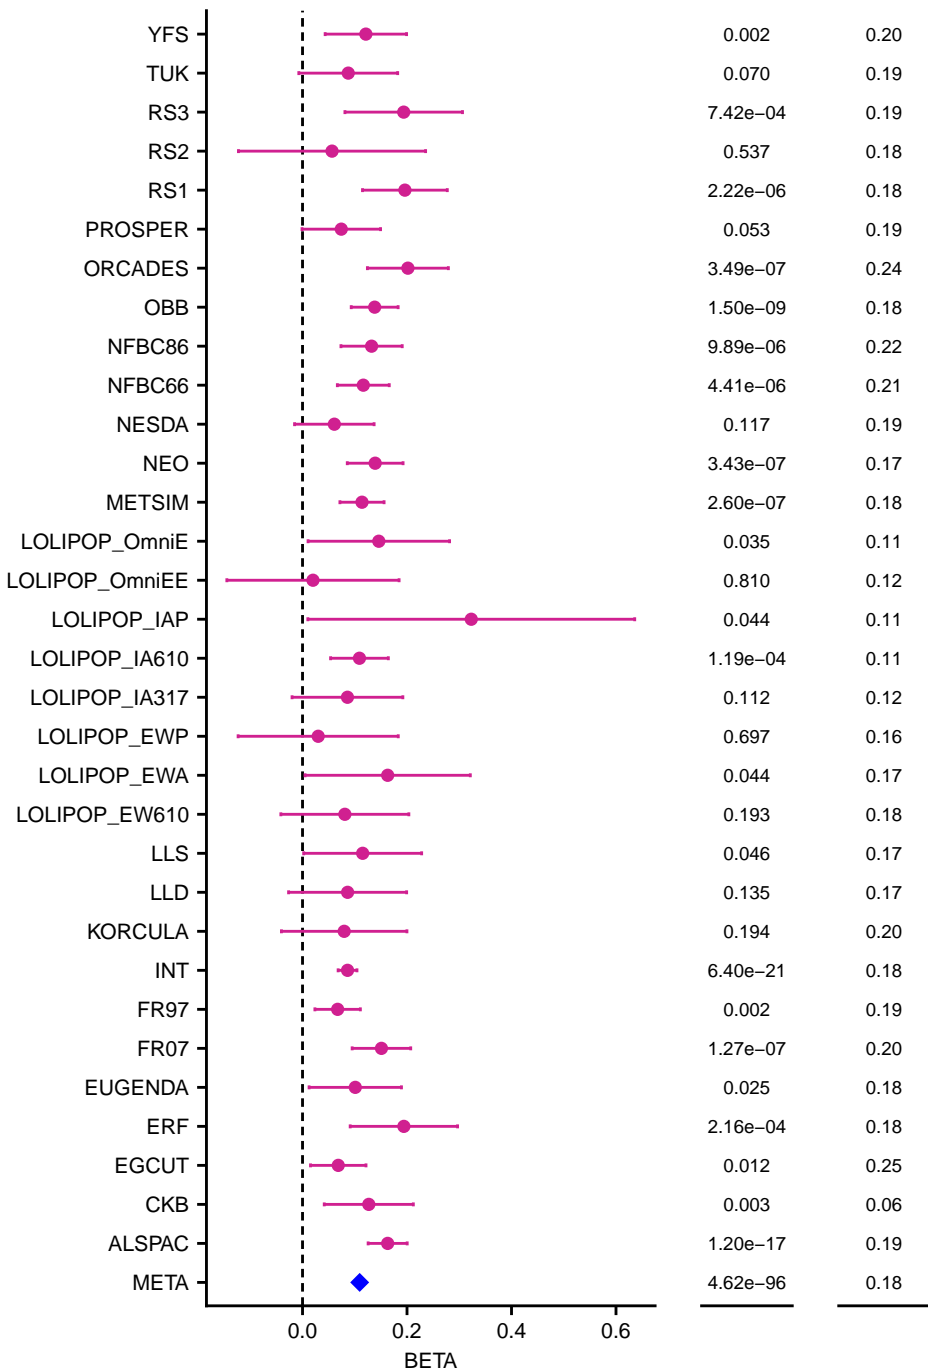

## chr10:102075479:A SFAByFA

P-value

EAF

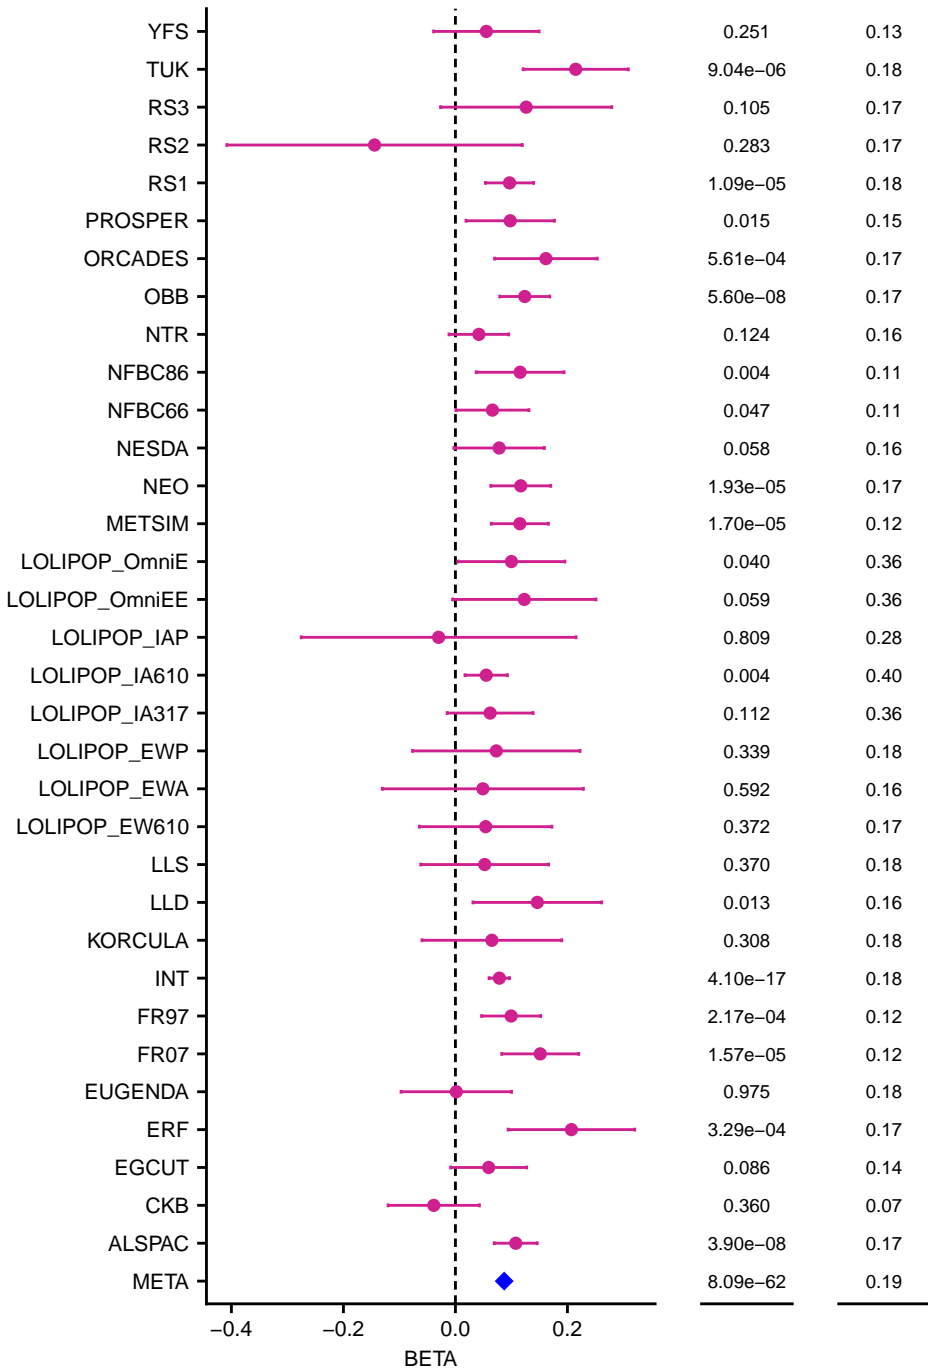

chr10:104118634:T S-HDL-C\_percent

P-value

EAF

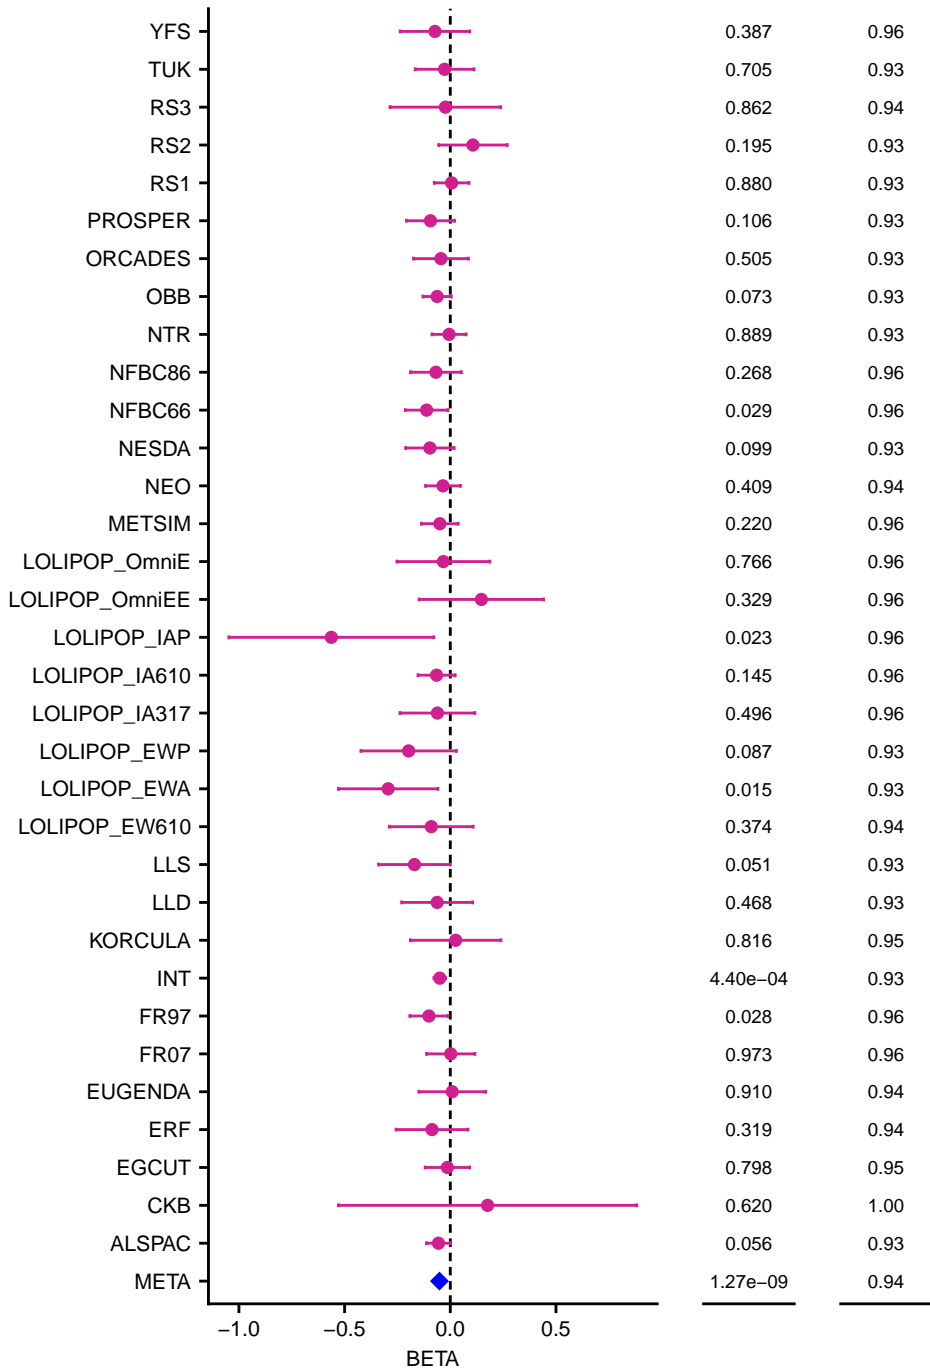

## chr10:113921825:A HDL-C

P-value

EAF

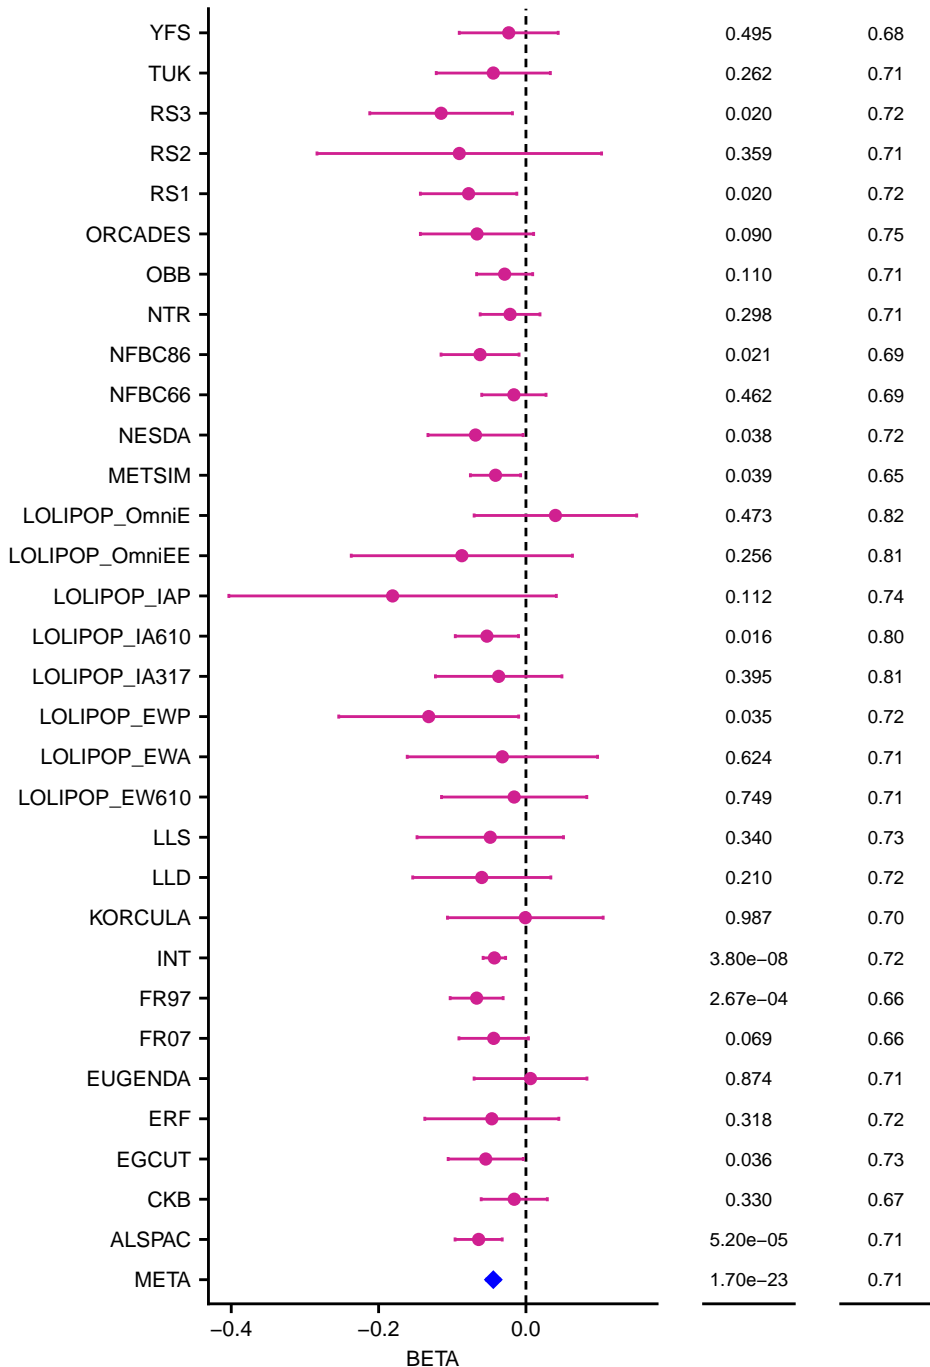

chr10:118394551:C DHA

P-value

EAF

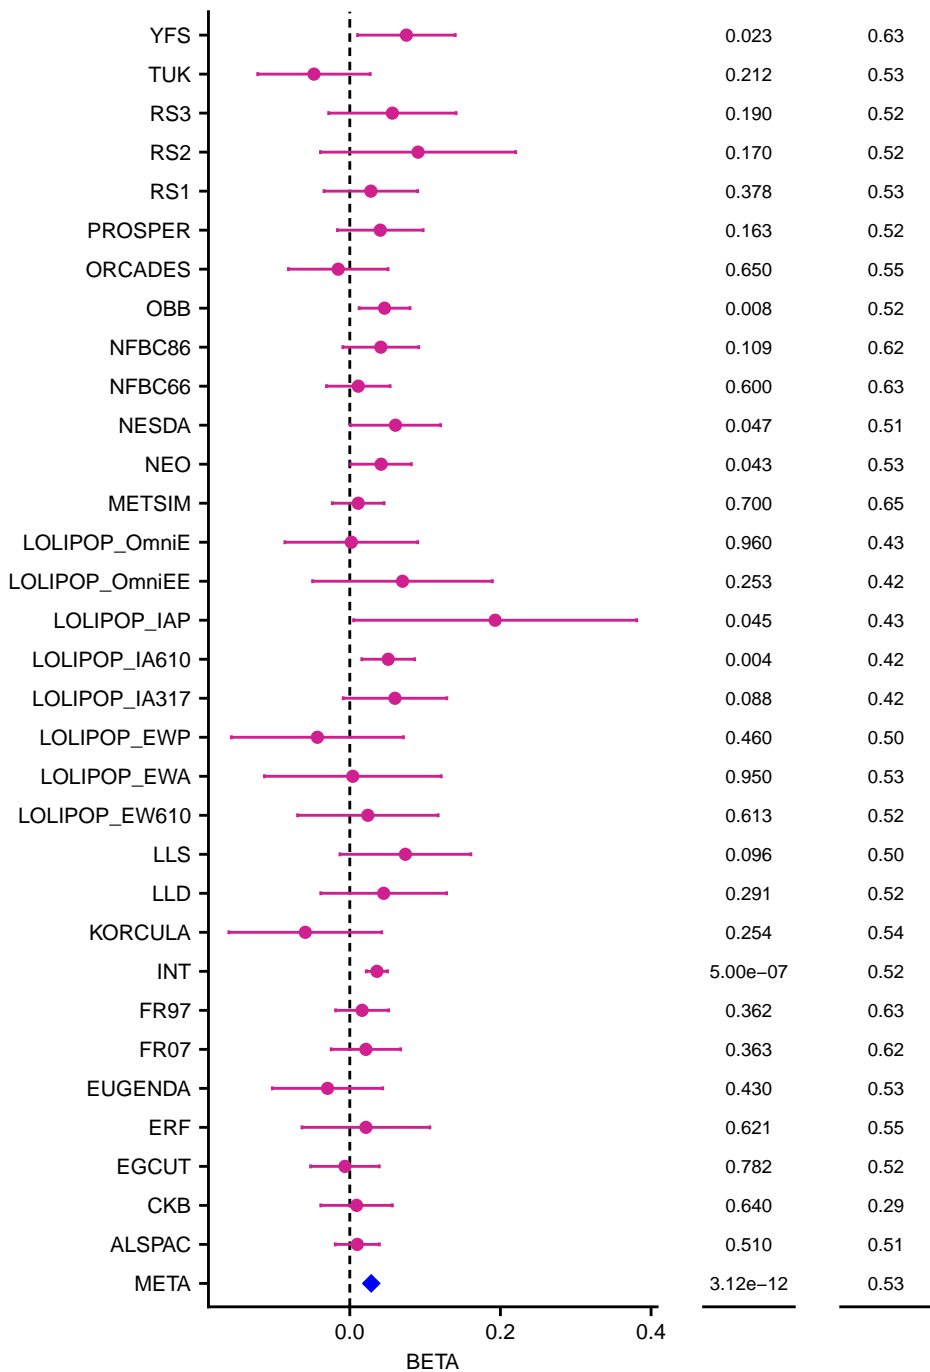

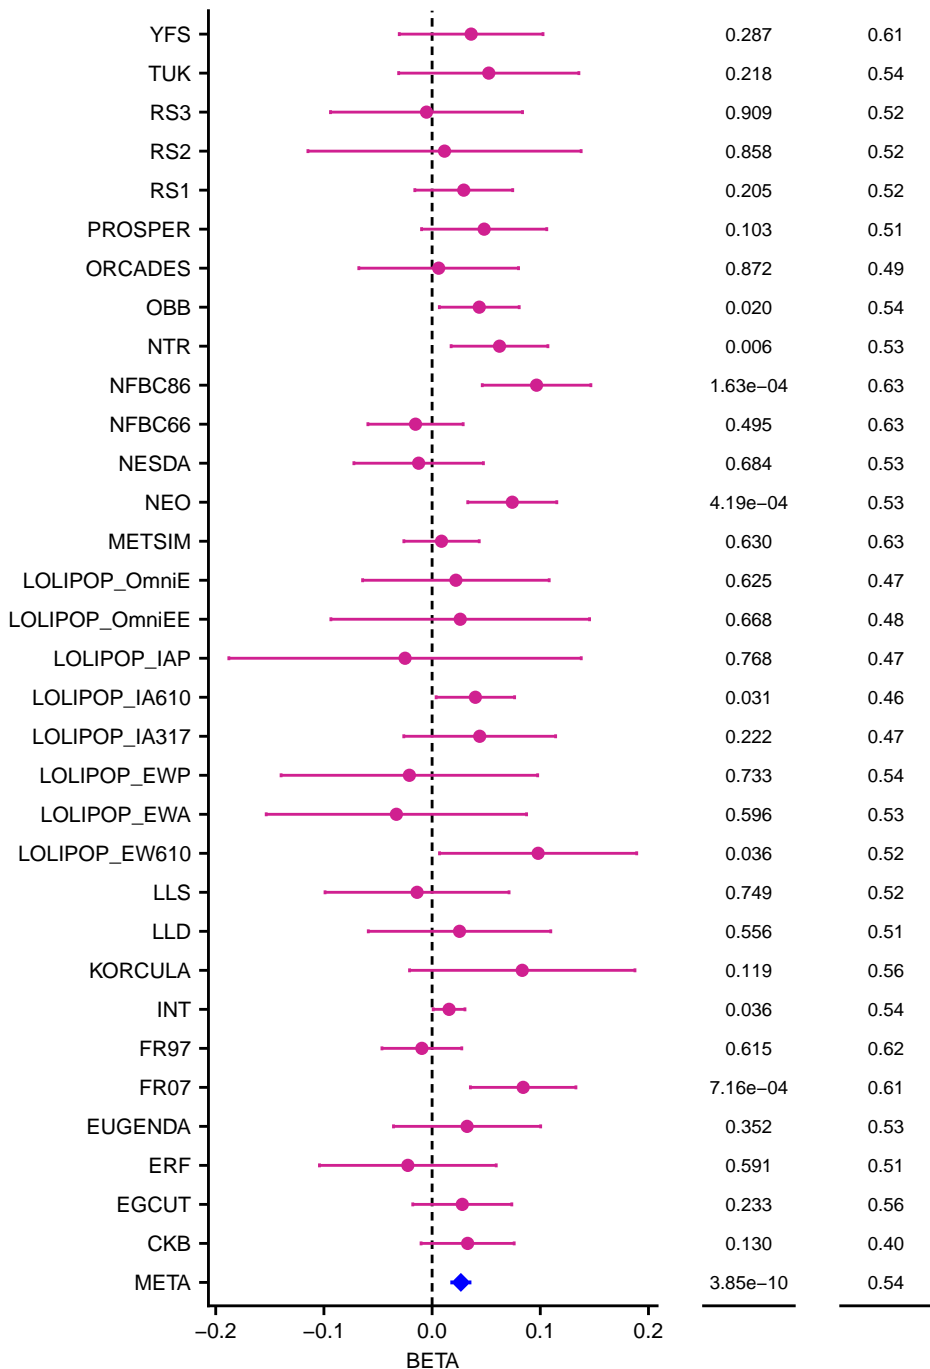



## chr10:135297996:A Acetone

P-value

EAF

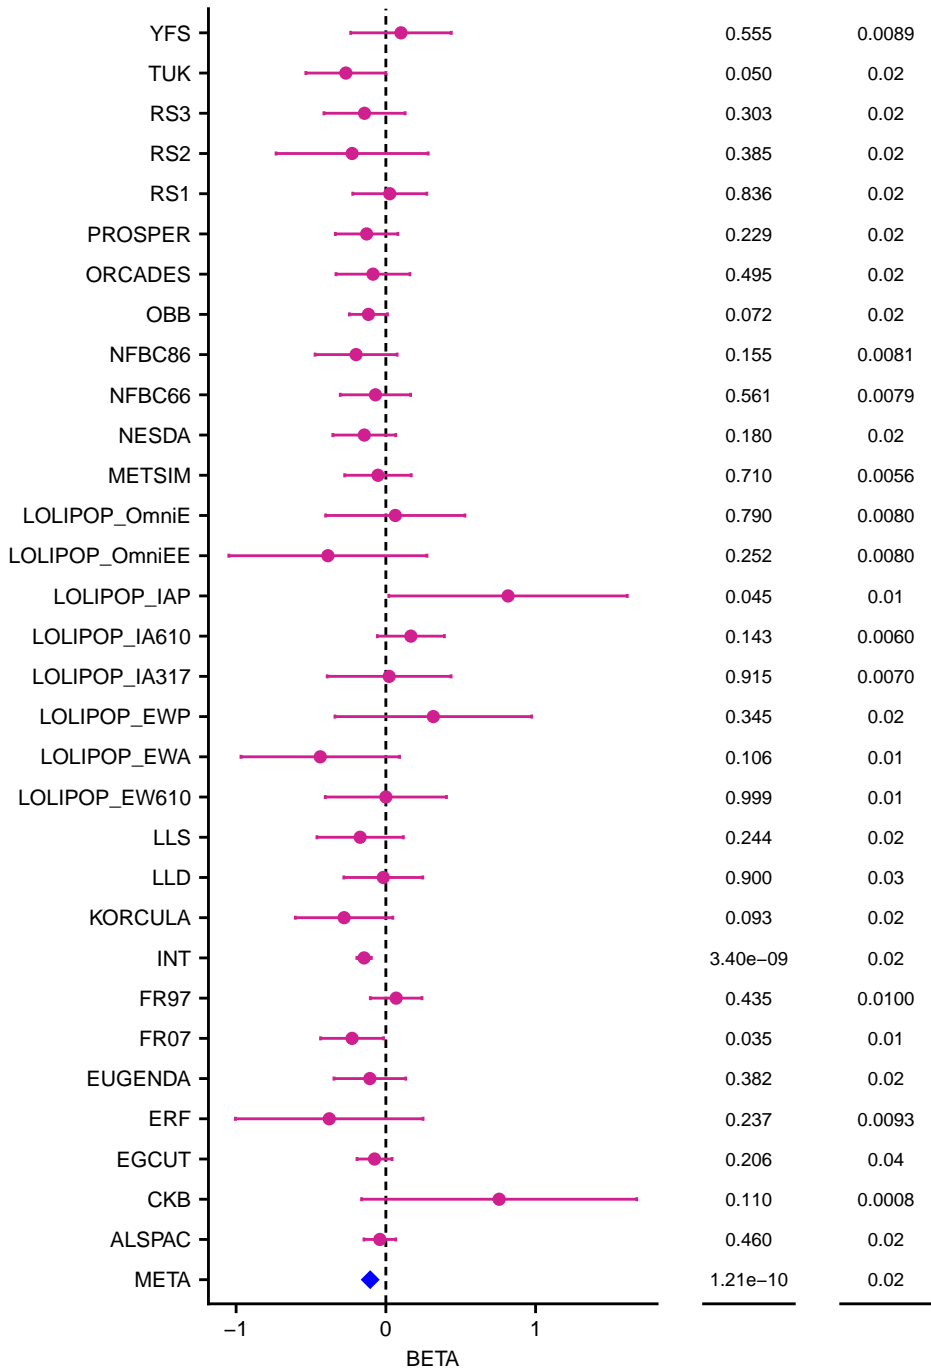

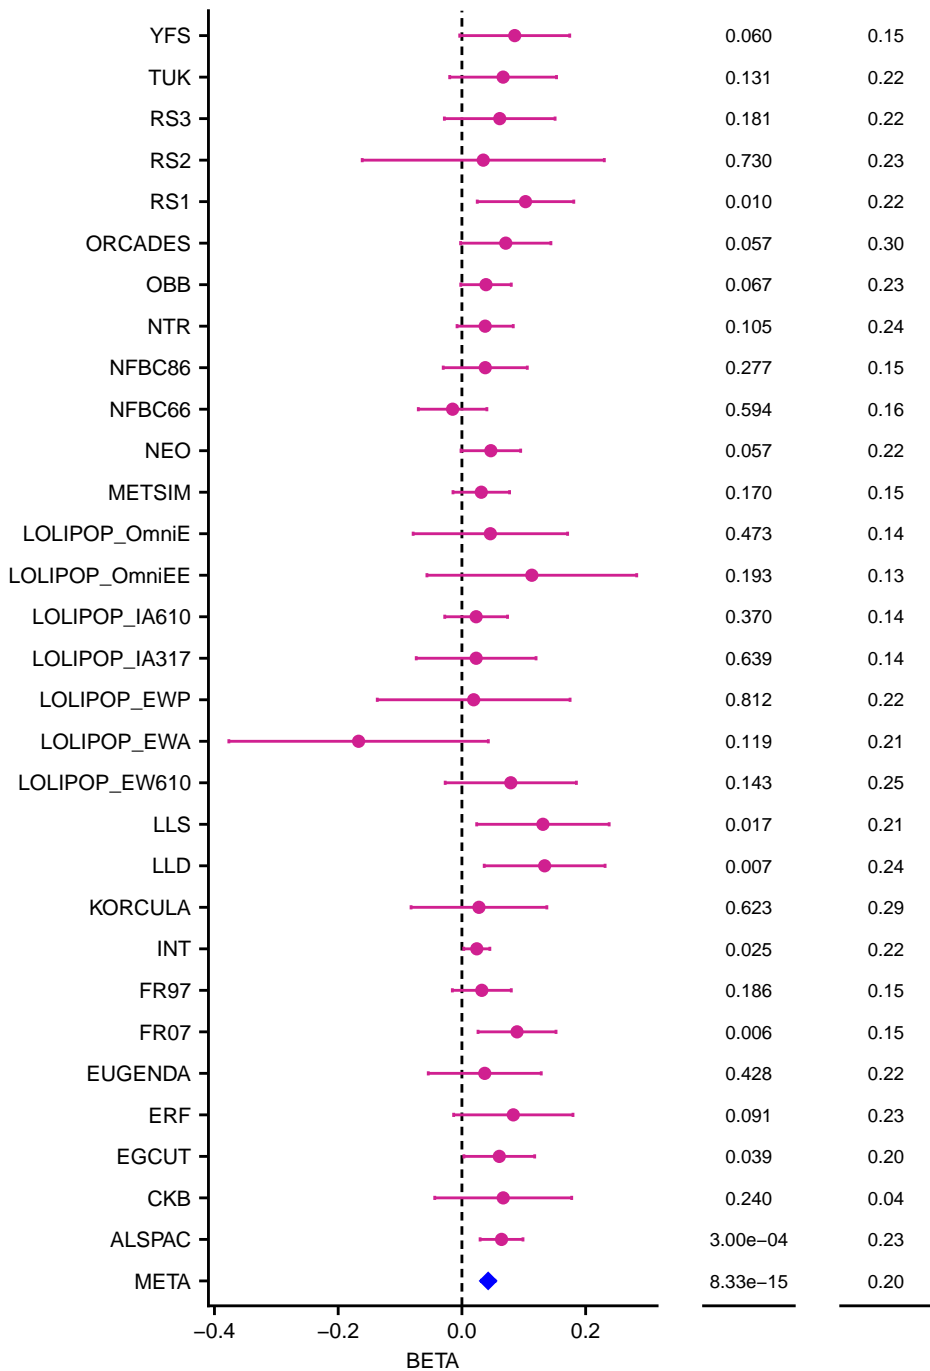

chr11:5701074:A S-LDL-PL\_percent

P-value

EAF

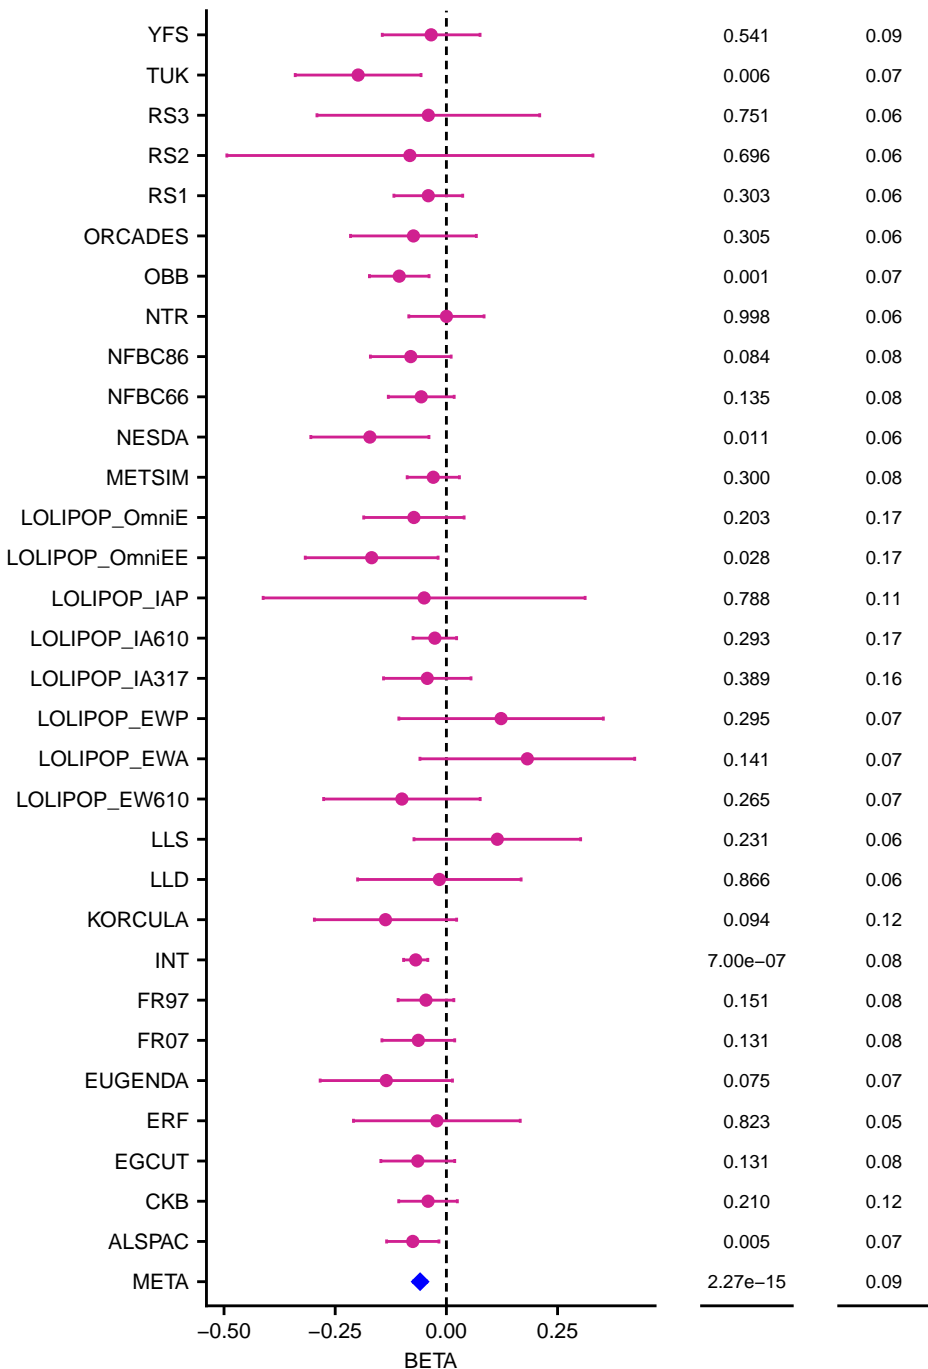

chr11:8255408:A Gln

P-value

EAF

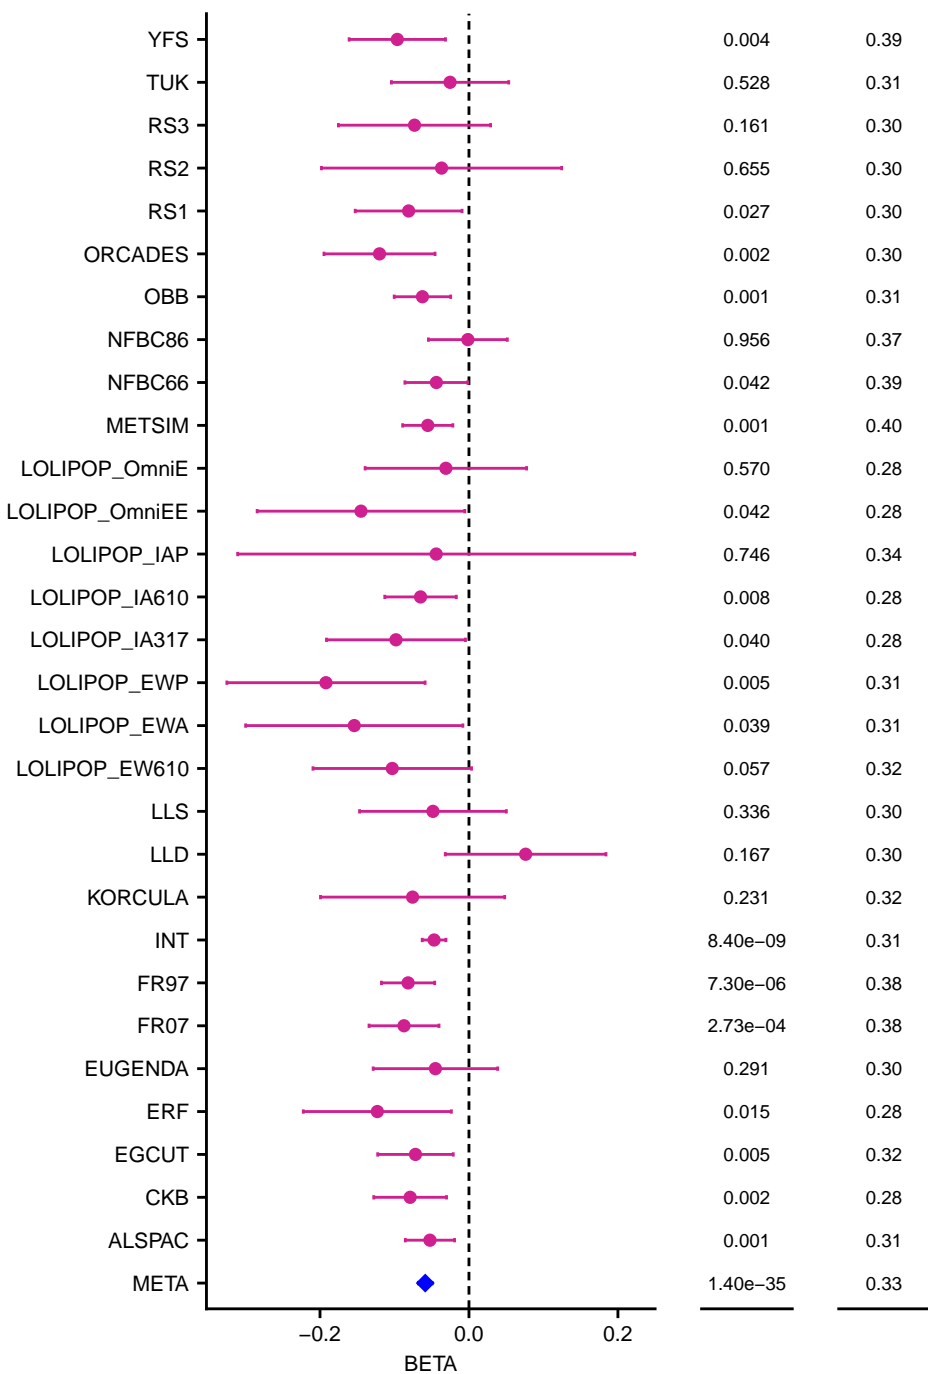

**chr11:14865399:T S-VLDL-TG****P-value****EAF**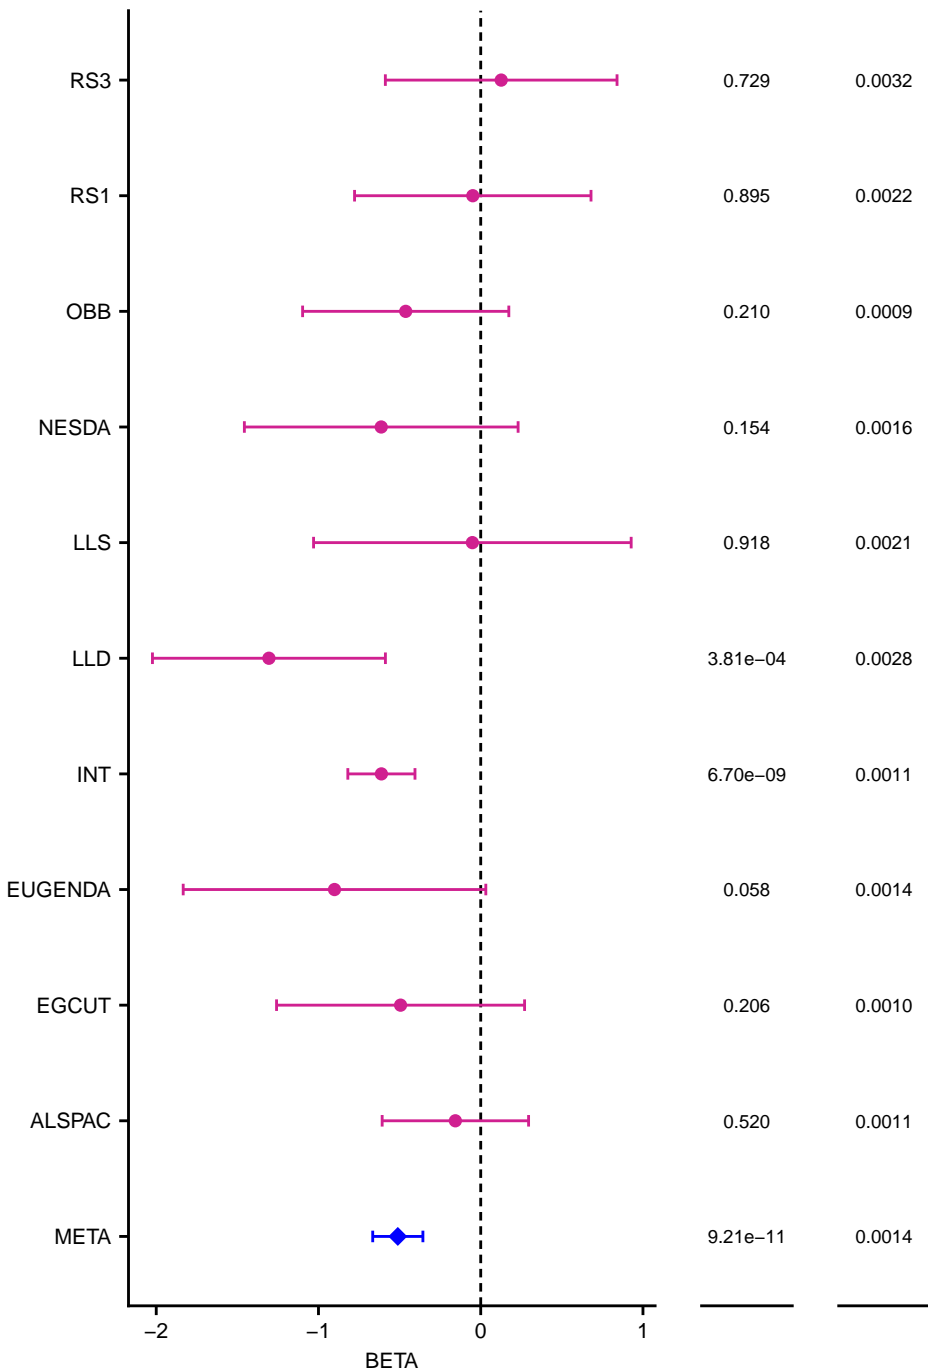

chr11:18632984:T M-LDL-TG

P-value

EAF

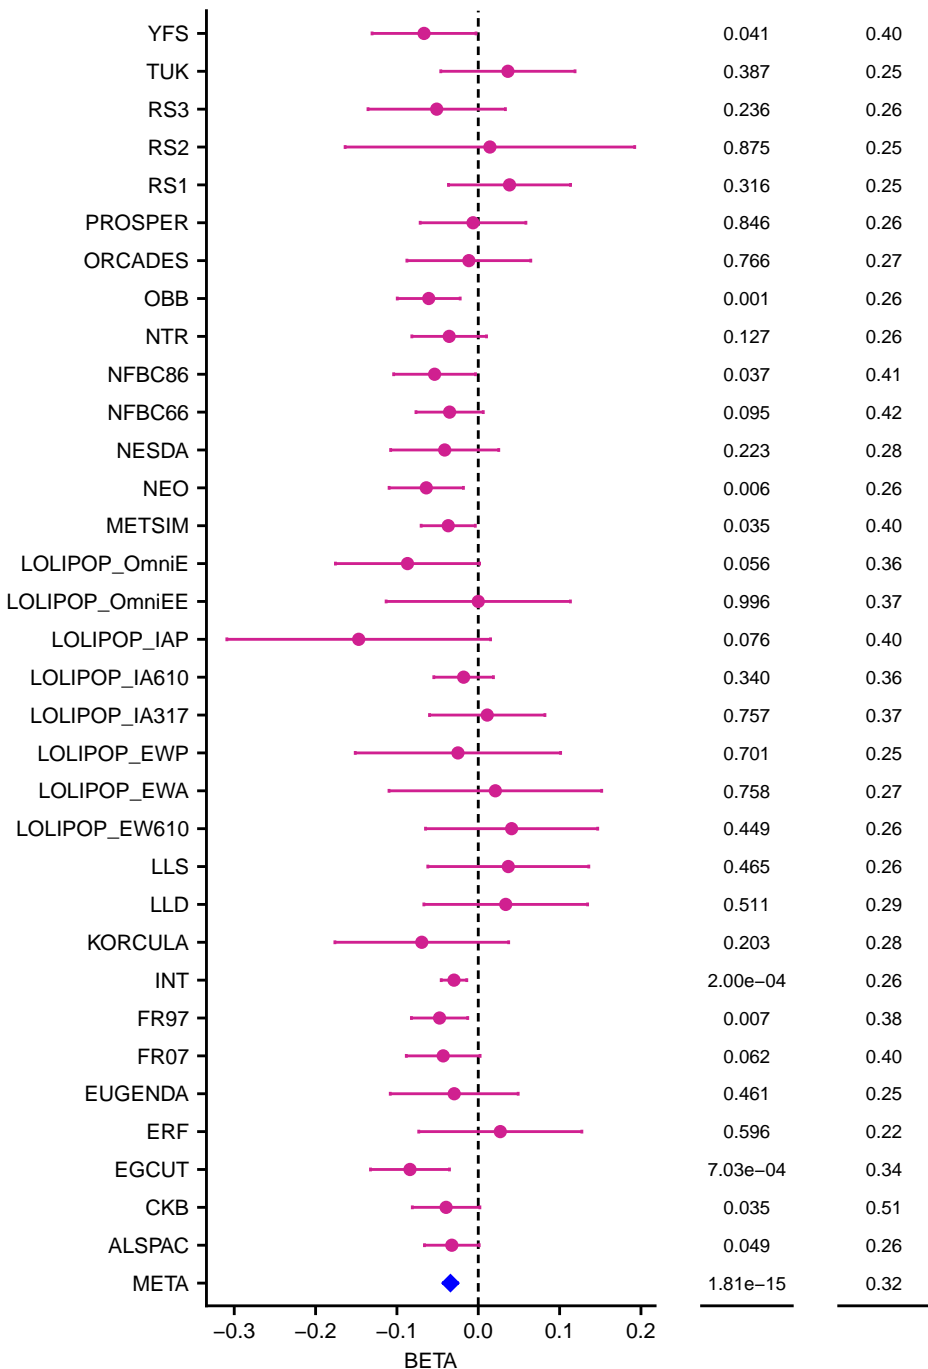

chr11:30760335:T Crea

P-value

EAF

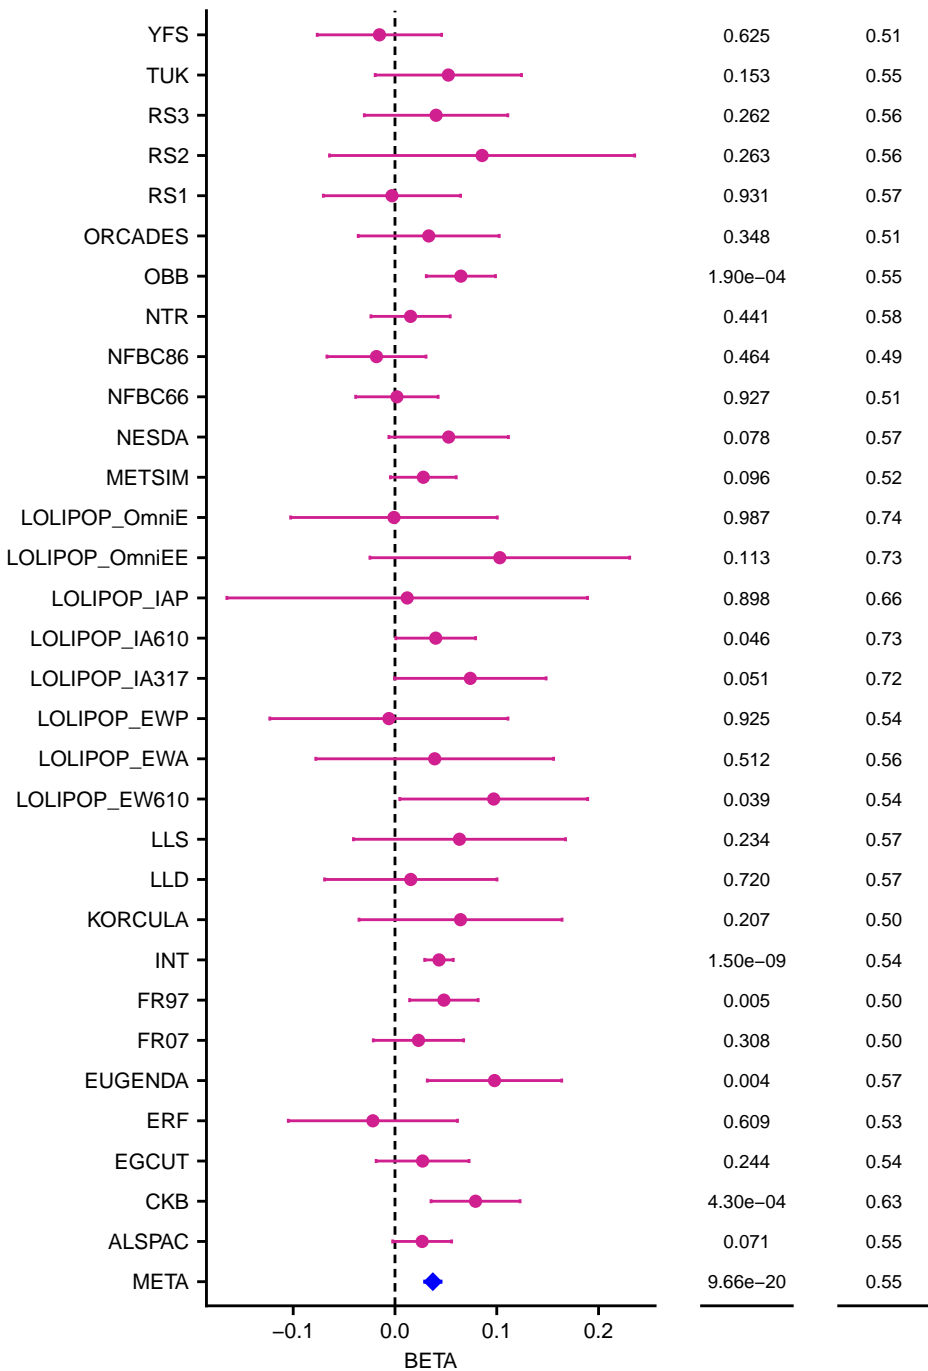

chr11:34969112:A Ala

P-value

EAF

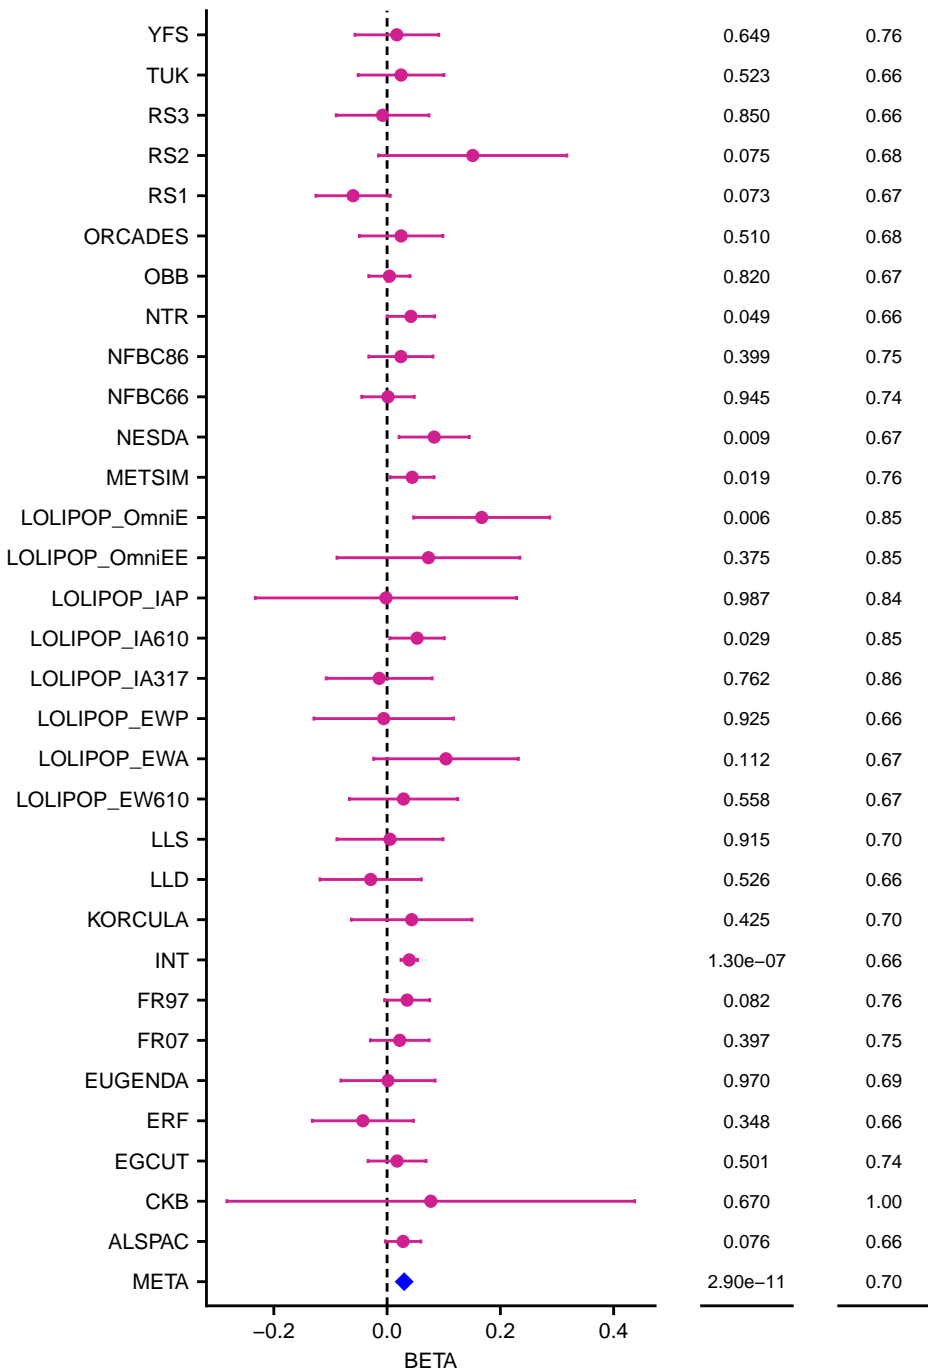



## chr11:47286290:T HDL-D

P-value

EAF

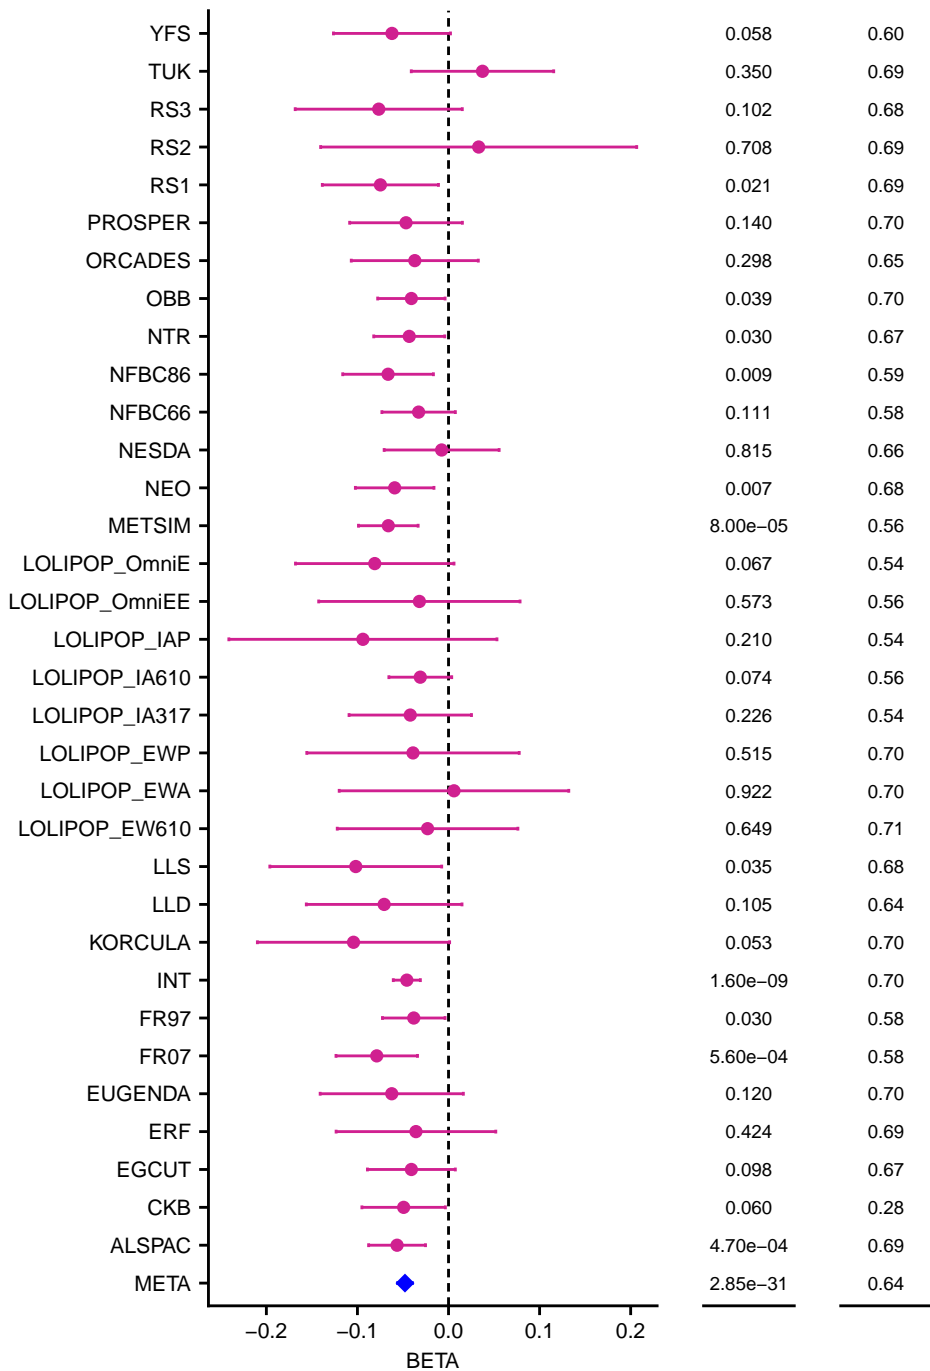

chr11:55048738:T M-HDL-C\_percent

P-value

EAF

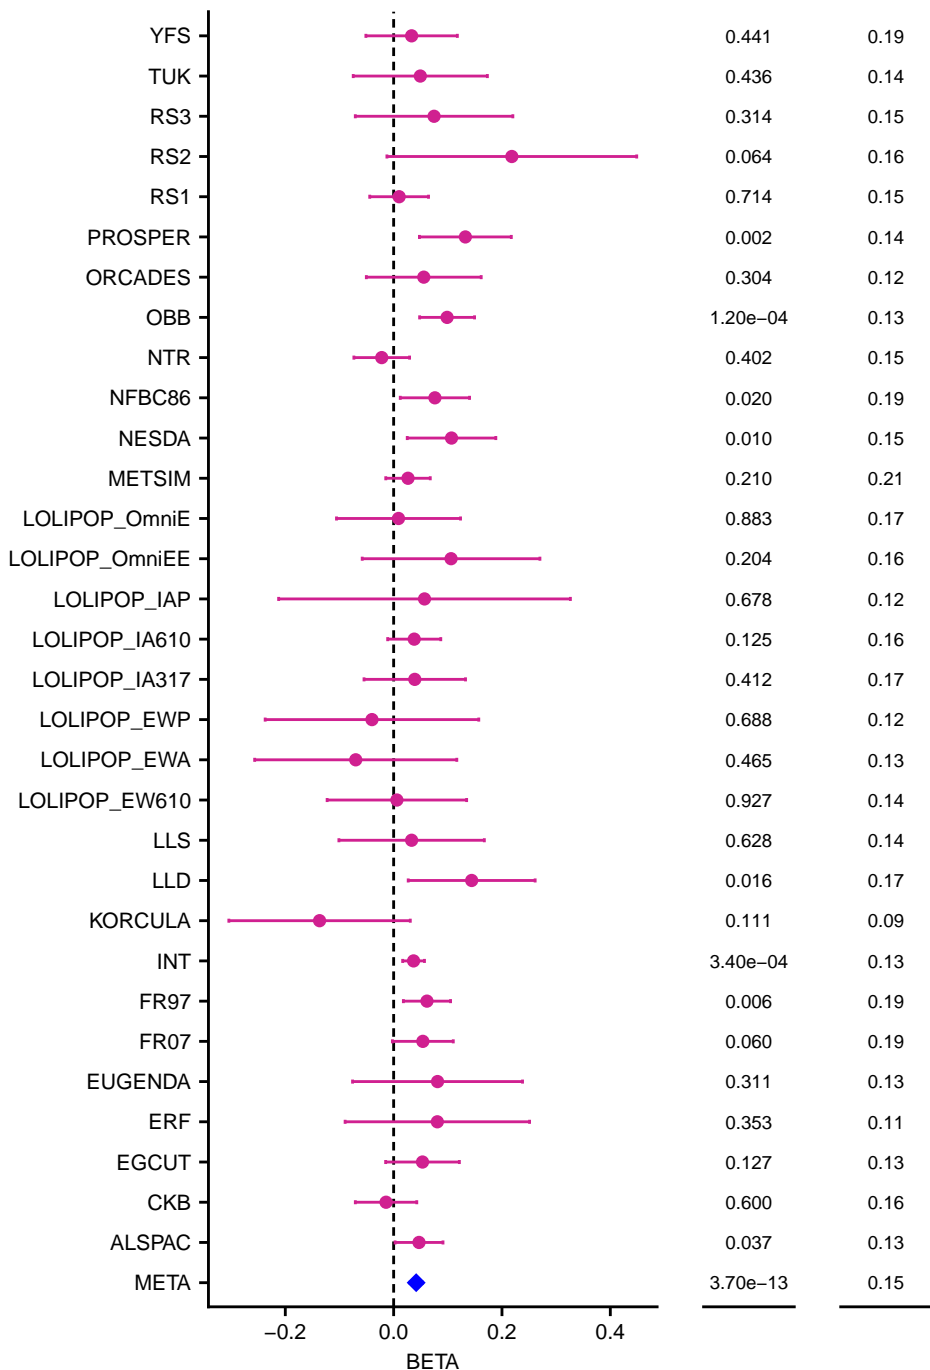

## chr11:61600342:A UnsatDeg

P-value

EAF

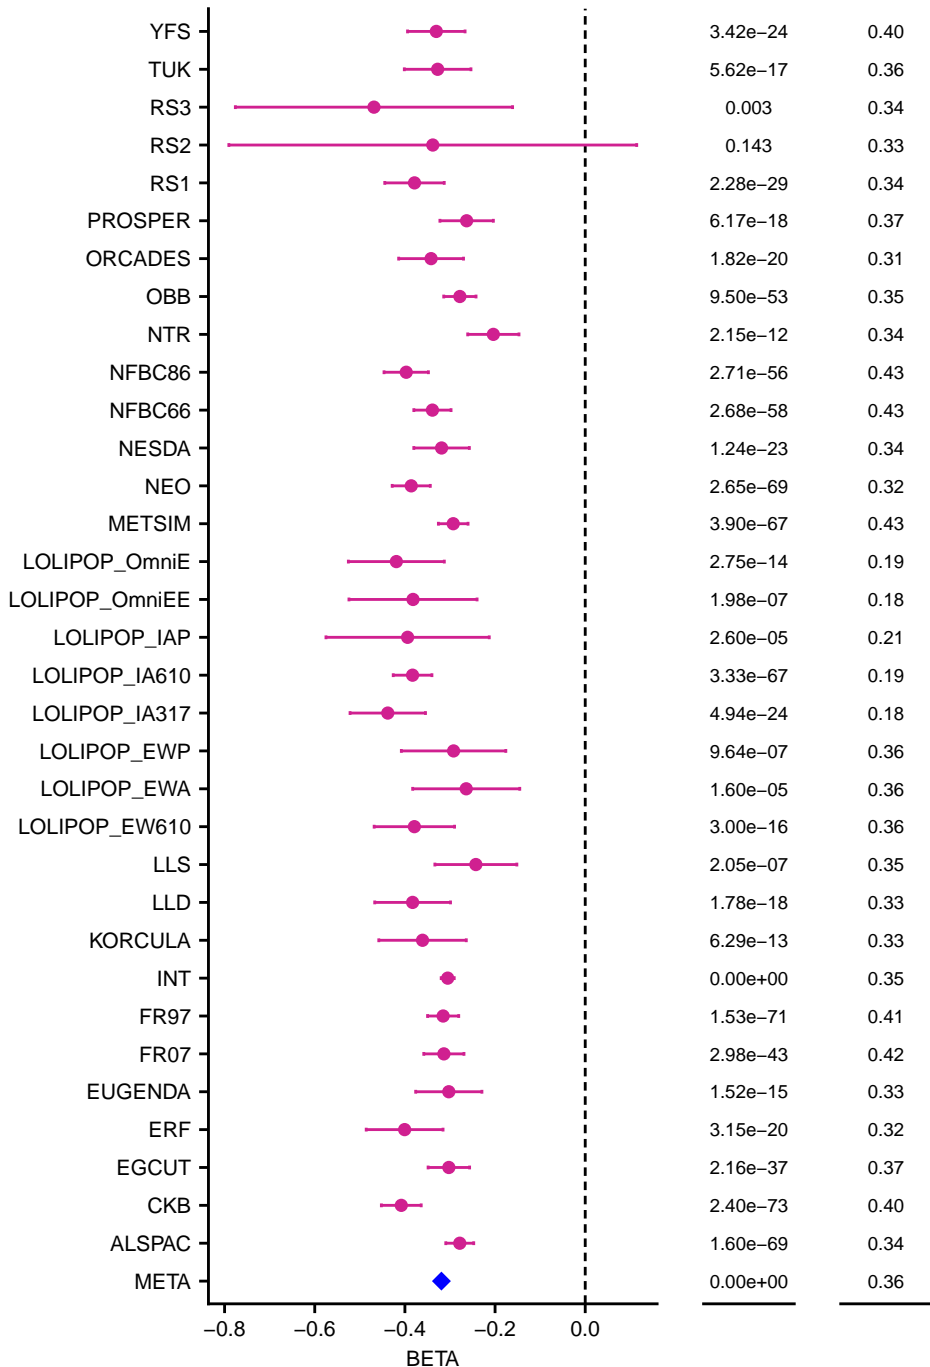

## chr11:68562328:T FAW3byFA

P-value

EAF

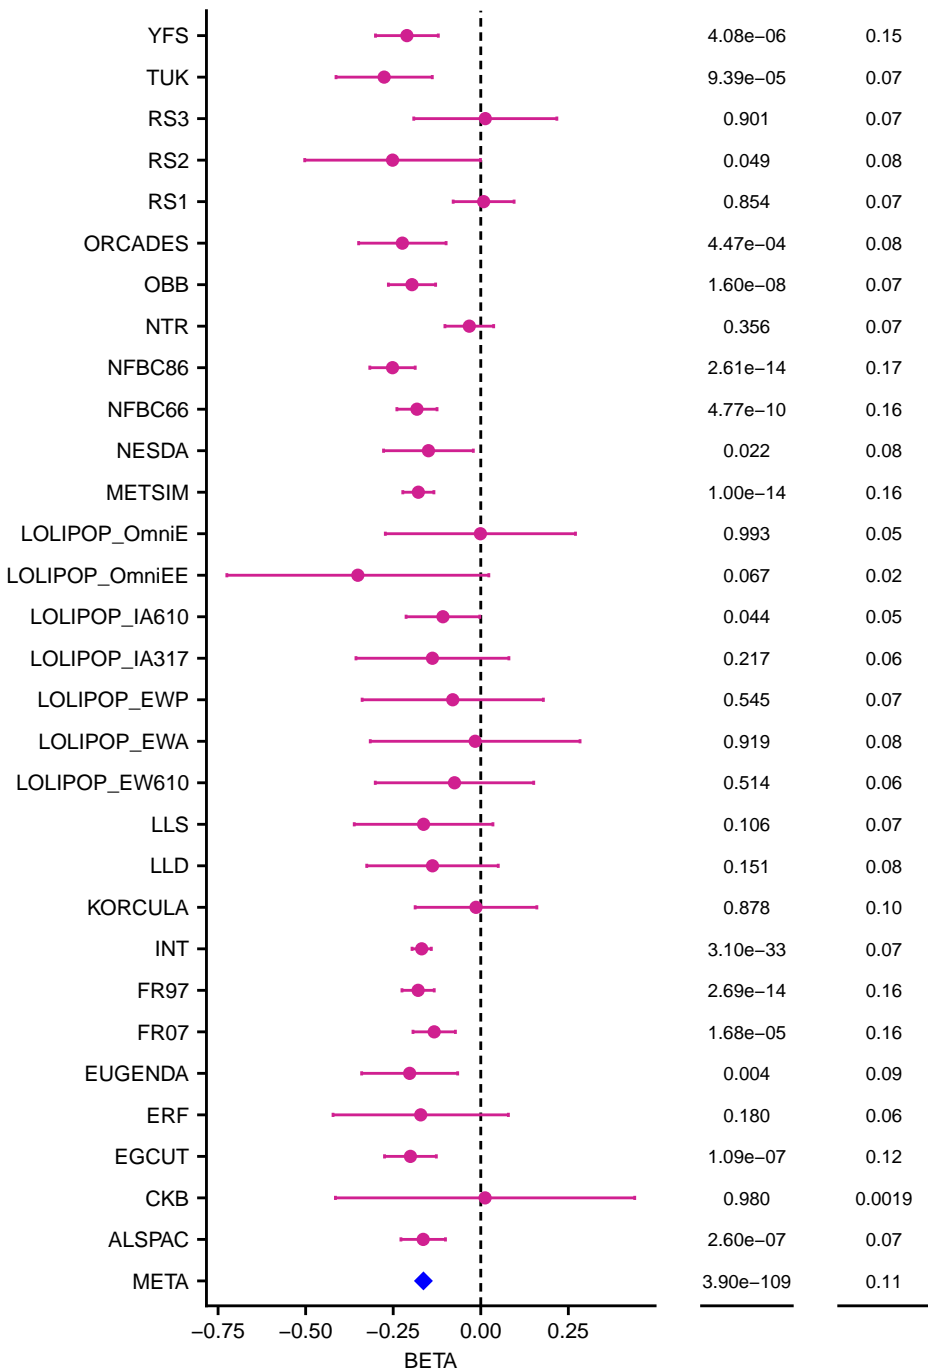

chr11:74109553:T Ala

P-value

EAF

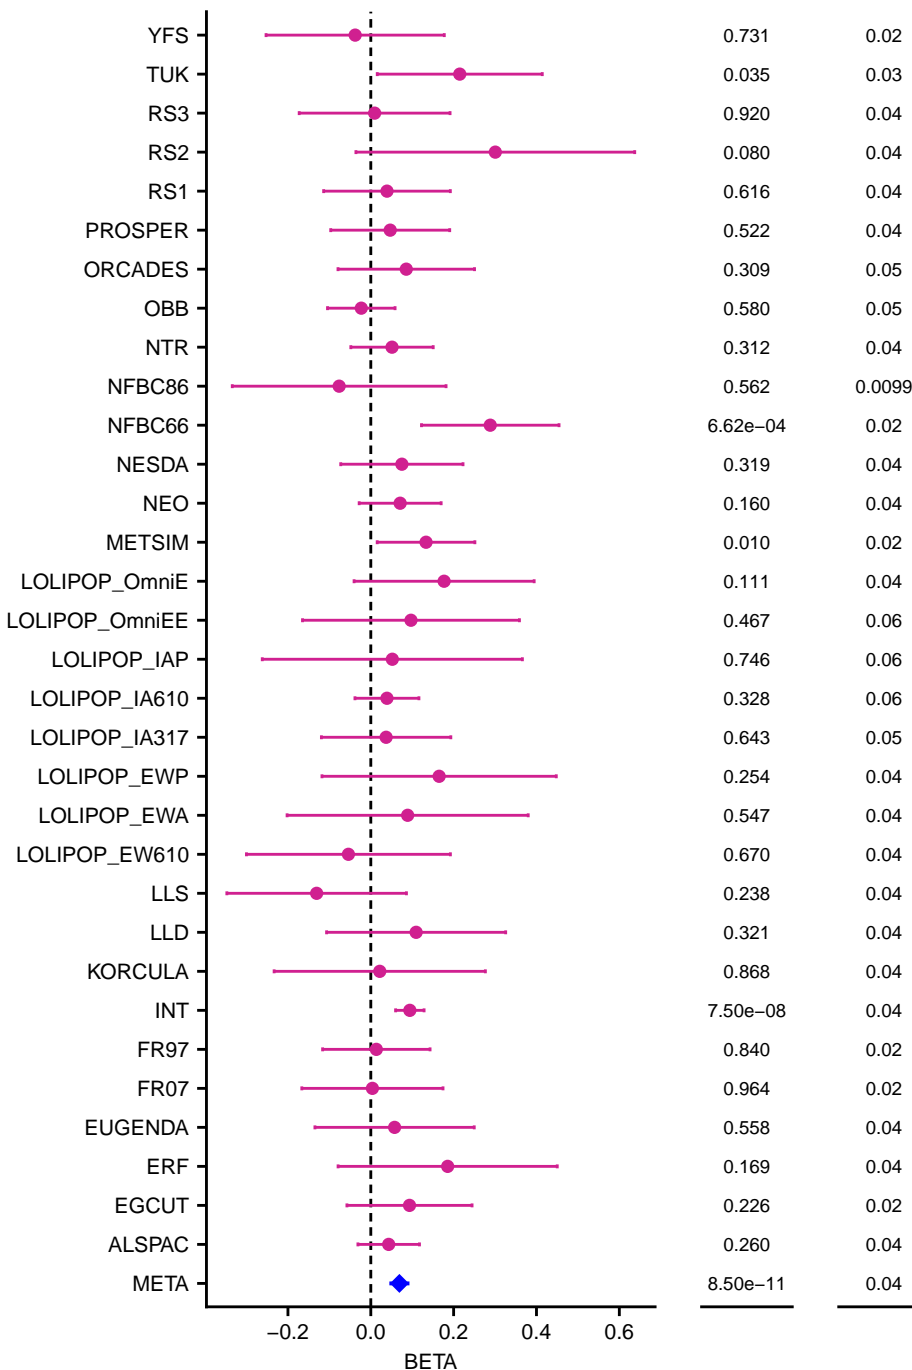

chr11:75452364:A M-HDL-PL

P-value

EAF

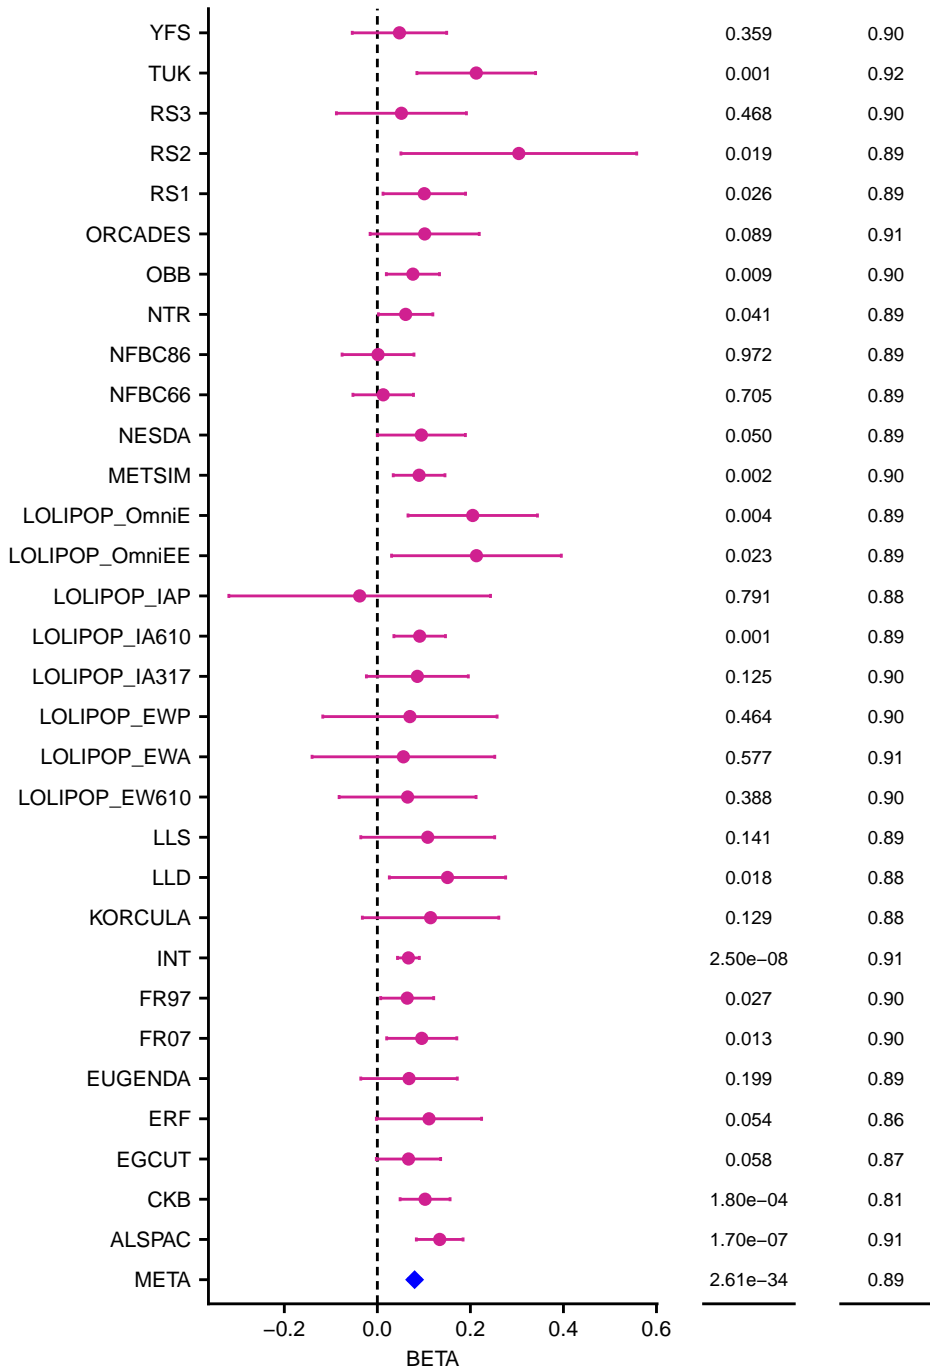

chr11:92708710:C Glc

P-value

EAF

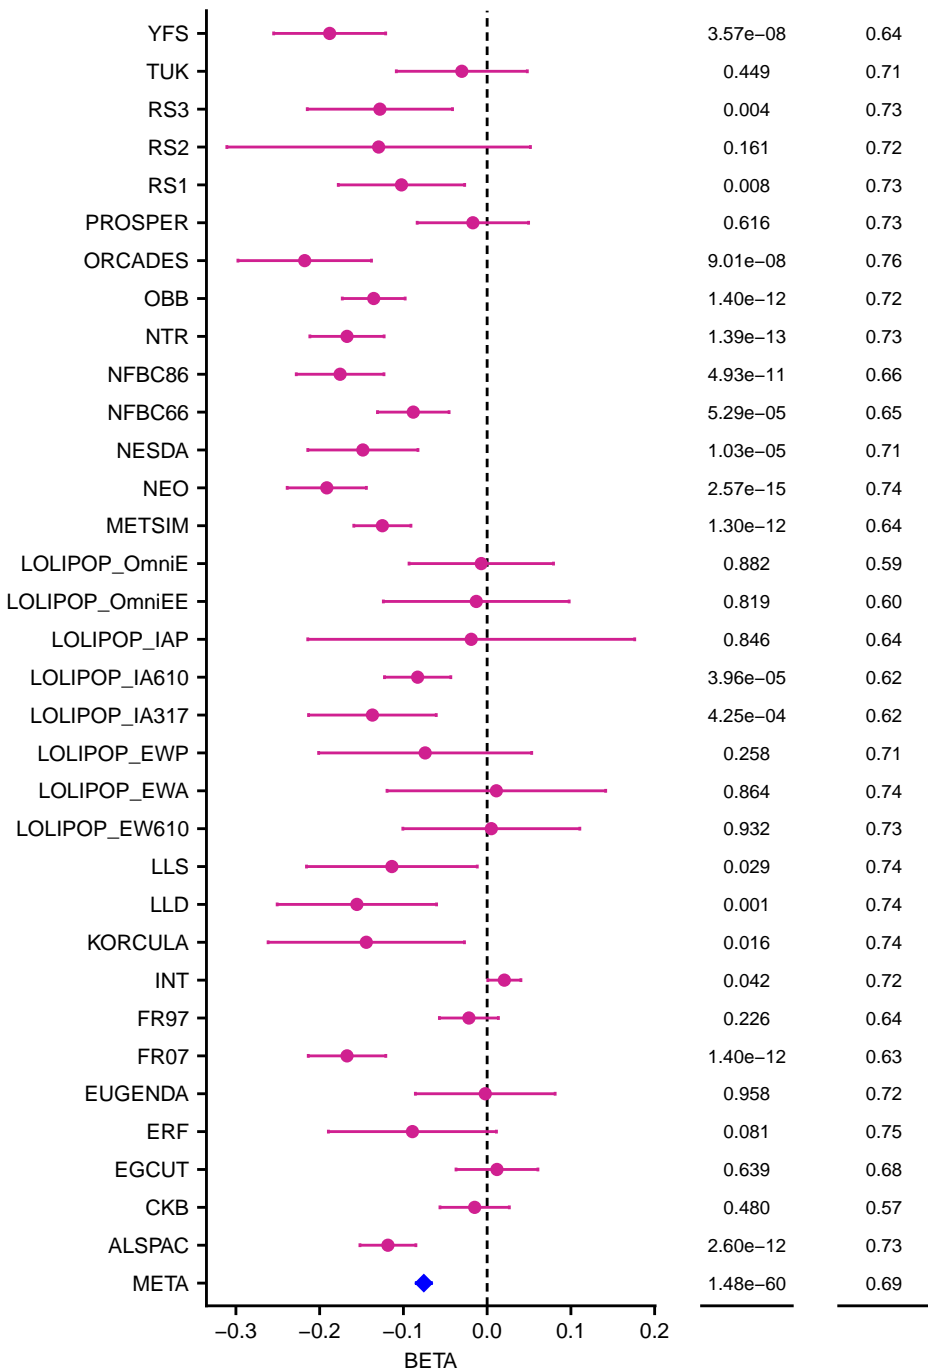

## chr11:116648917: C S-VLDL-TG

P-value

EAF

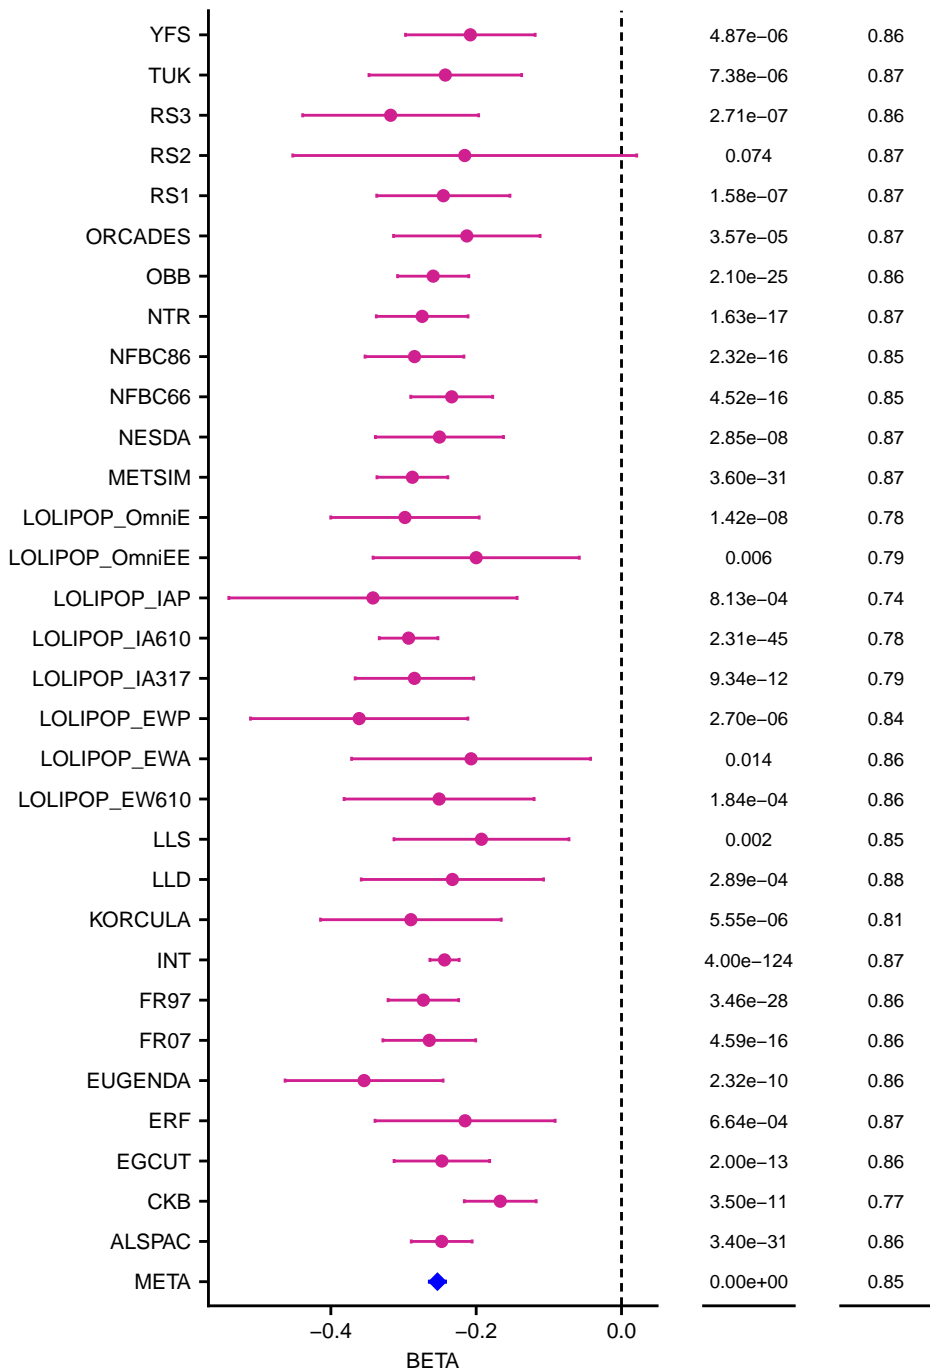



## chr11:122543314:A TotCho

P-value

EAF

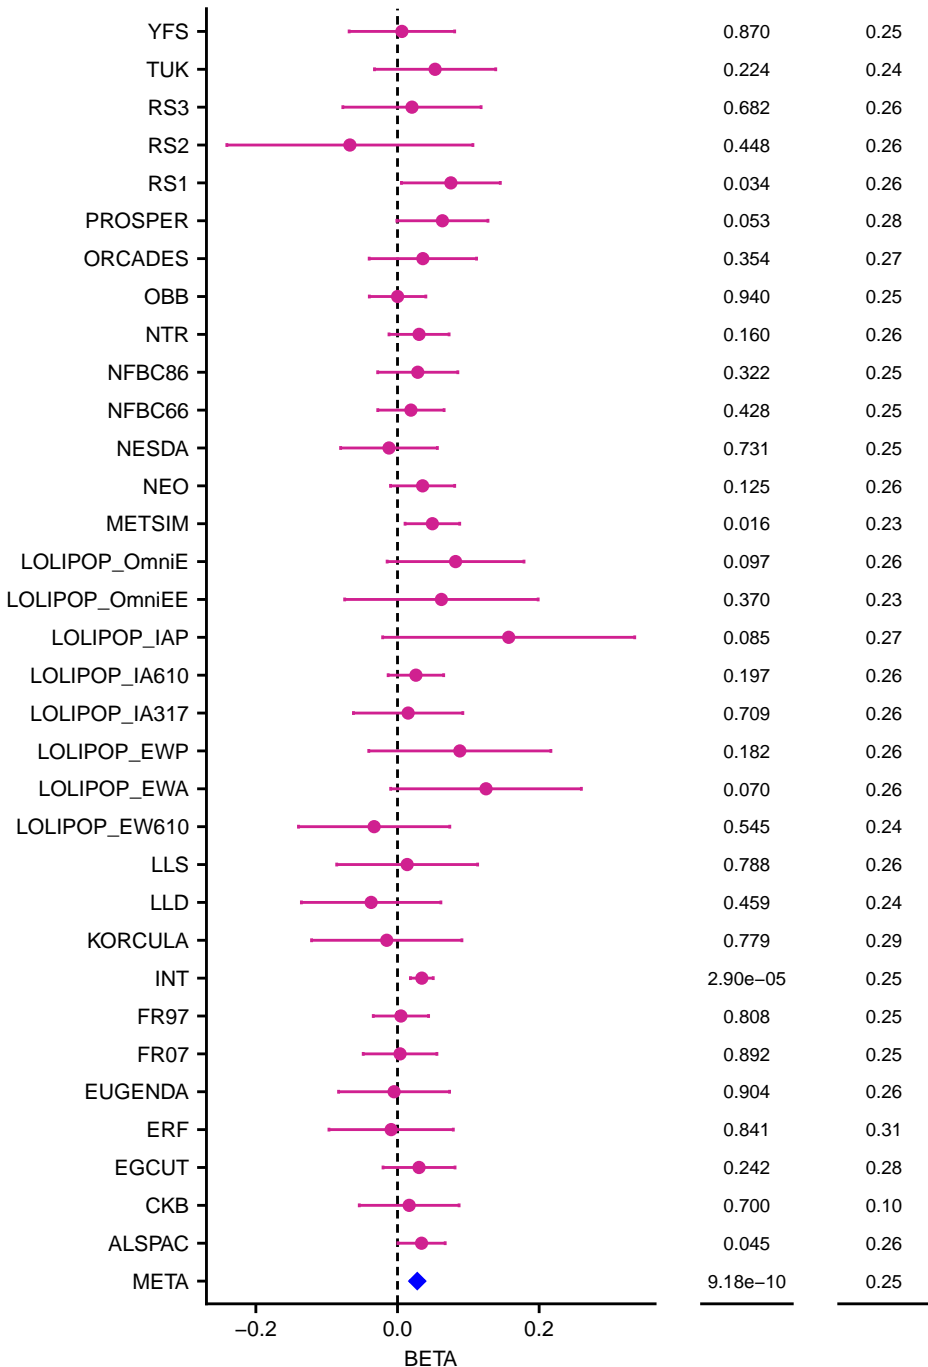

chr11:126228000:T L-HDL-PL\_percent

P-value

EAF

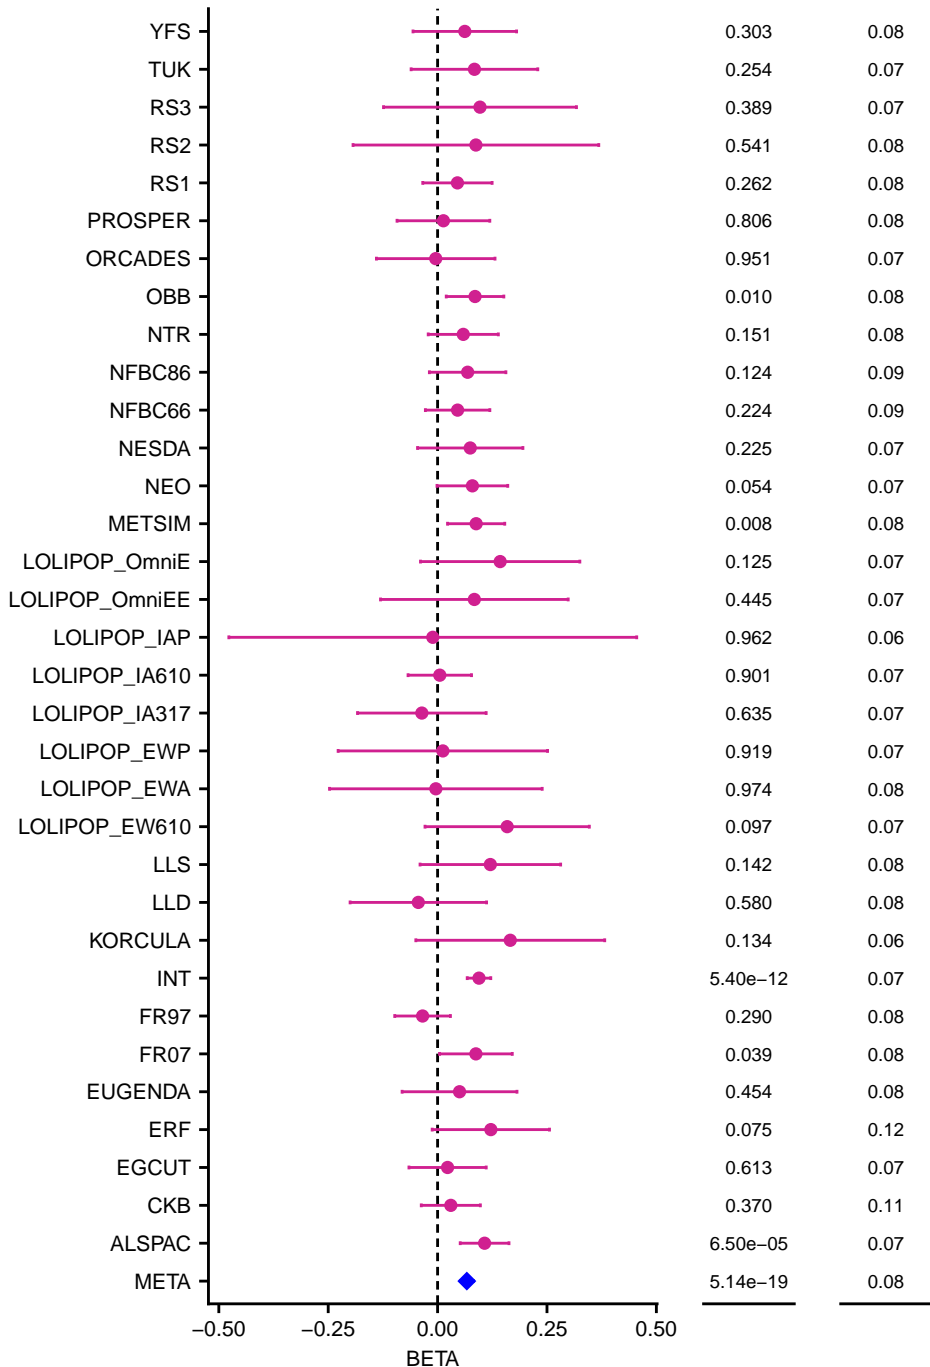

## chr11:130668271:C XS-VLDL-C

P-value

EAF

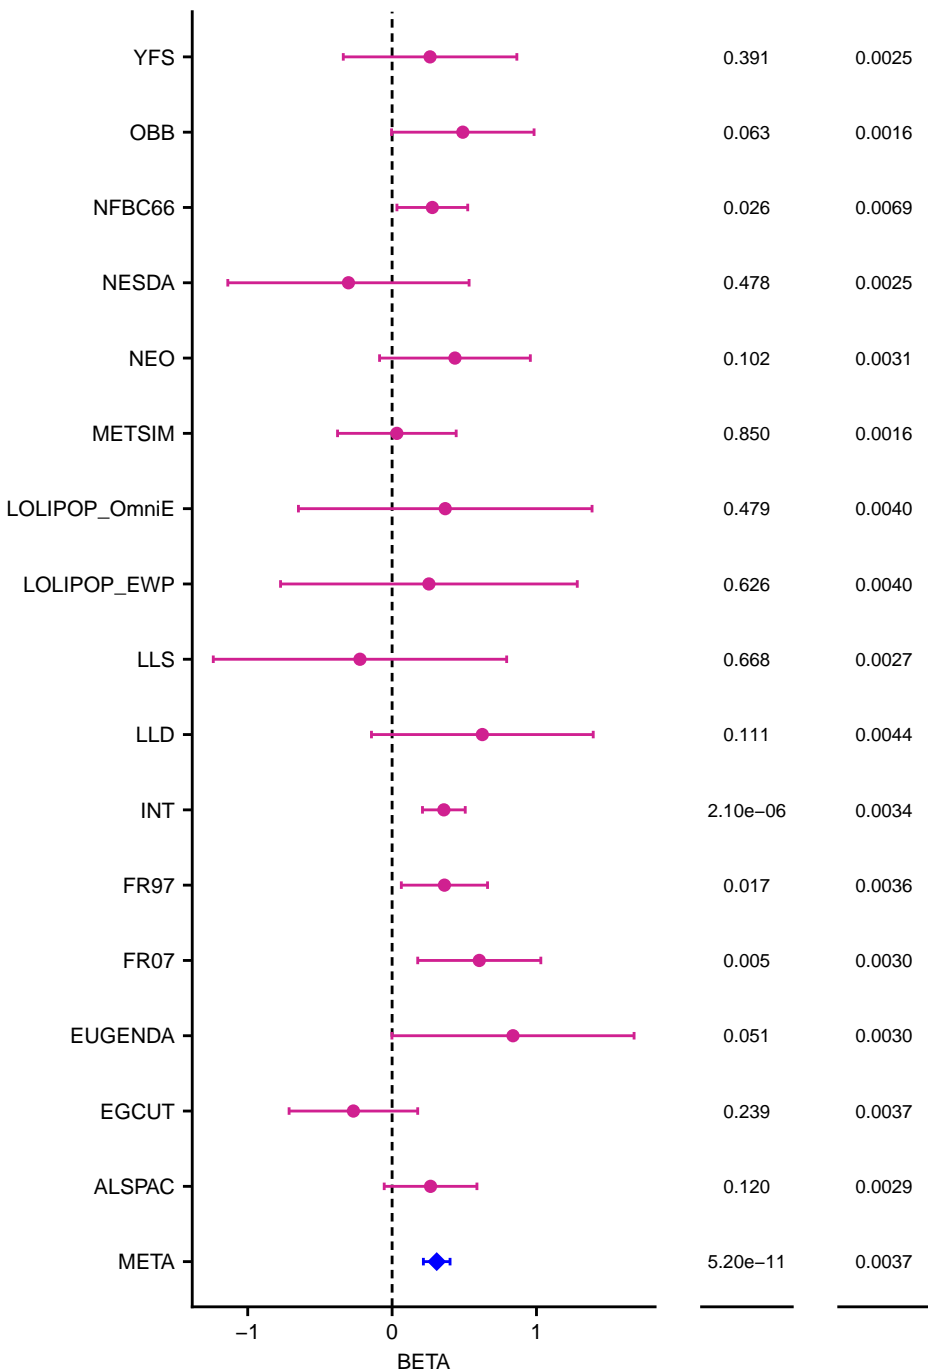

chr12:349298:T Crea

P-value

EAF

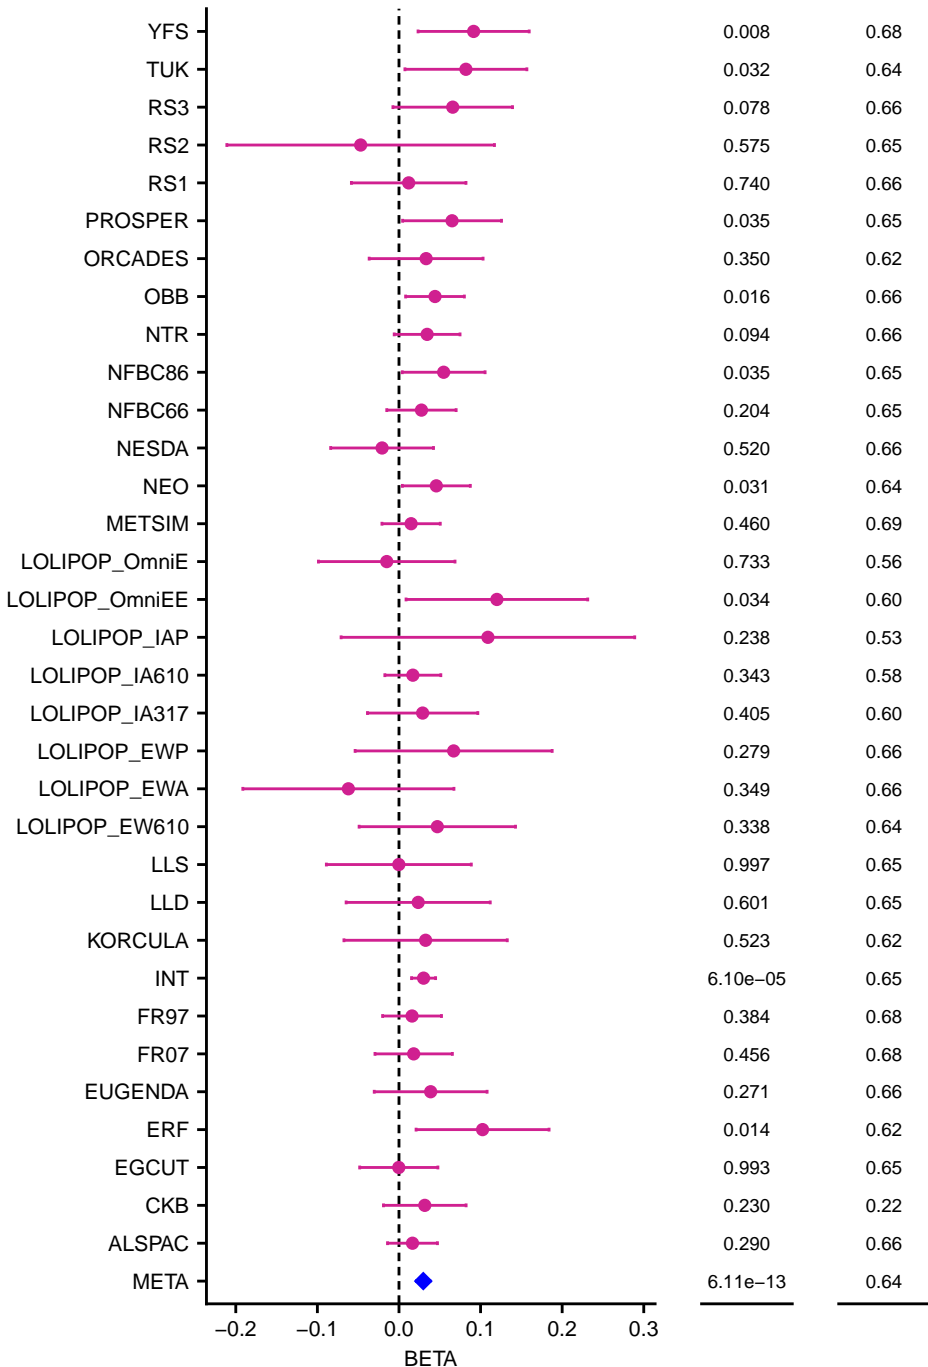

chr12:4384844:T Glc

P-value

EAF

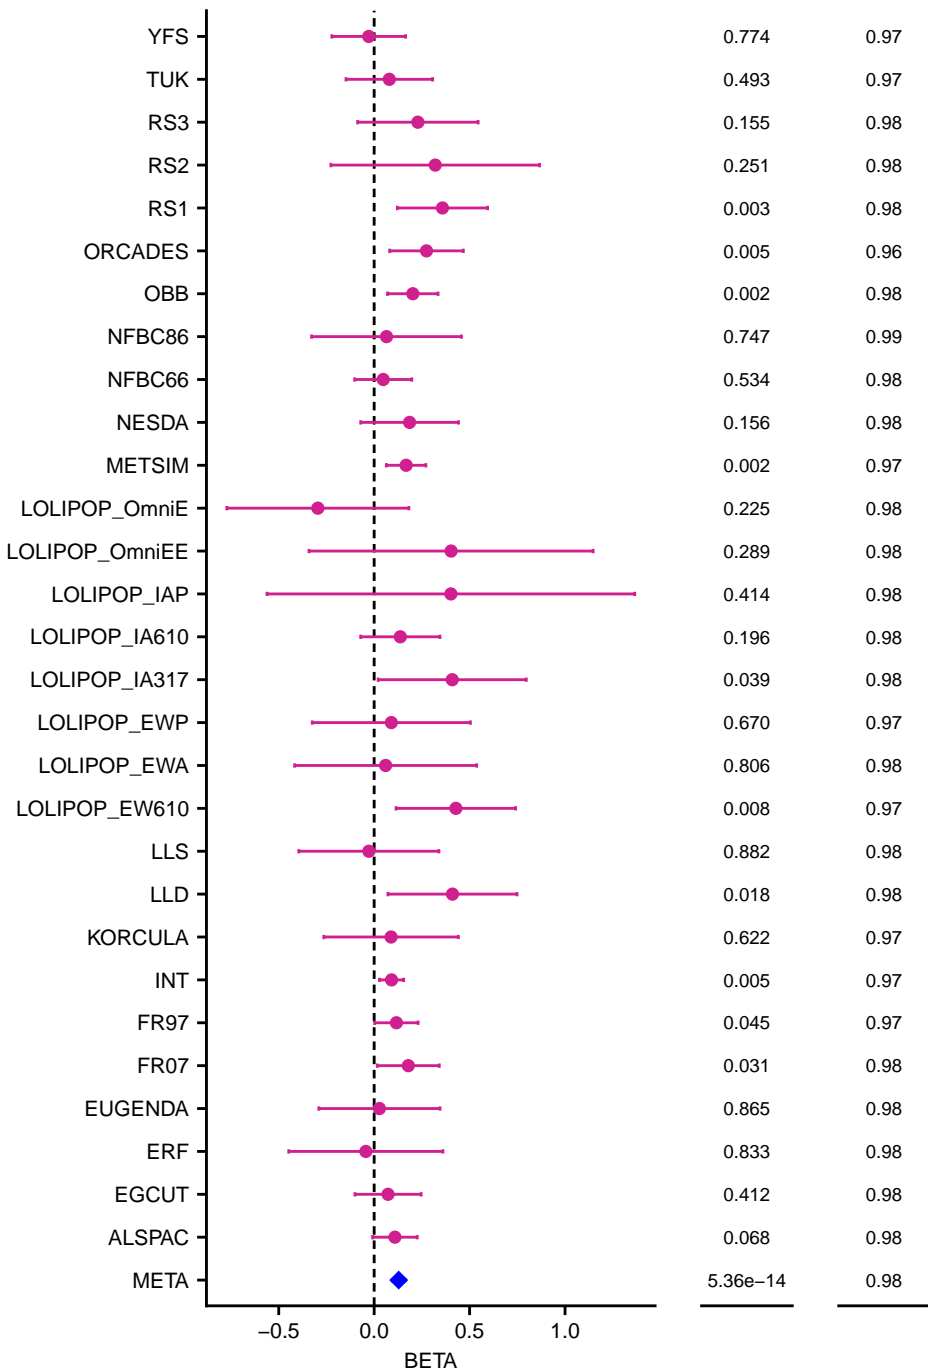

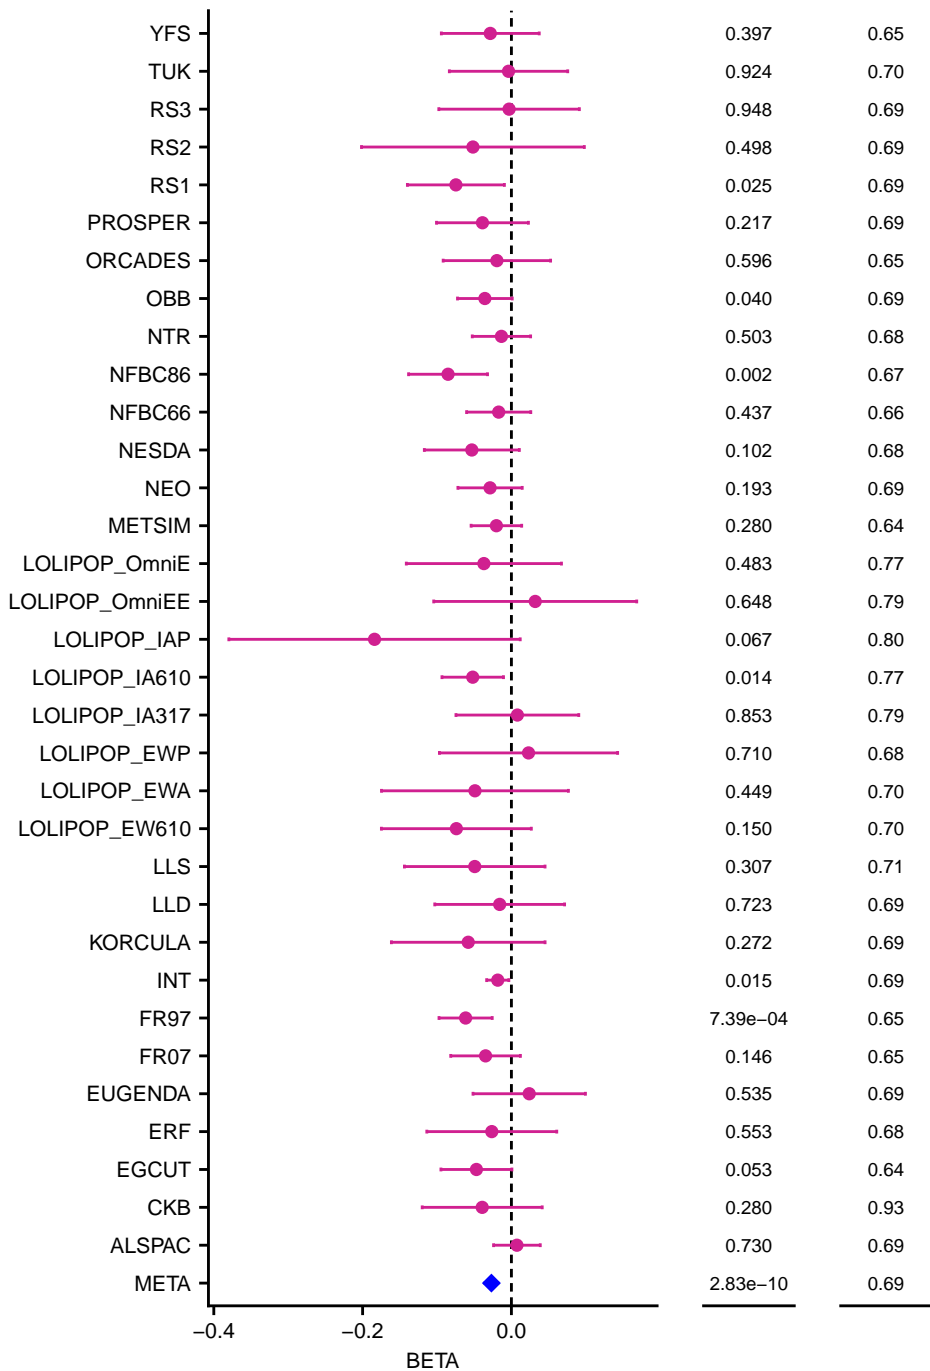

## chr12:21331549:T XS-VLDL-C\_percent

P-value

EAF

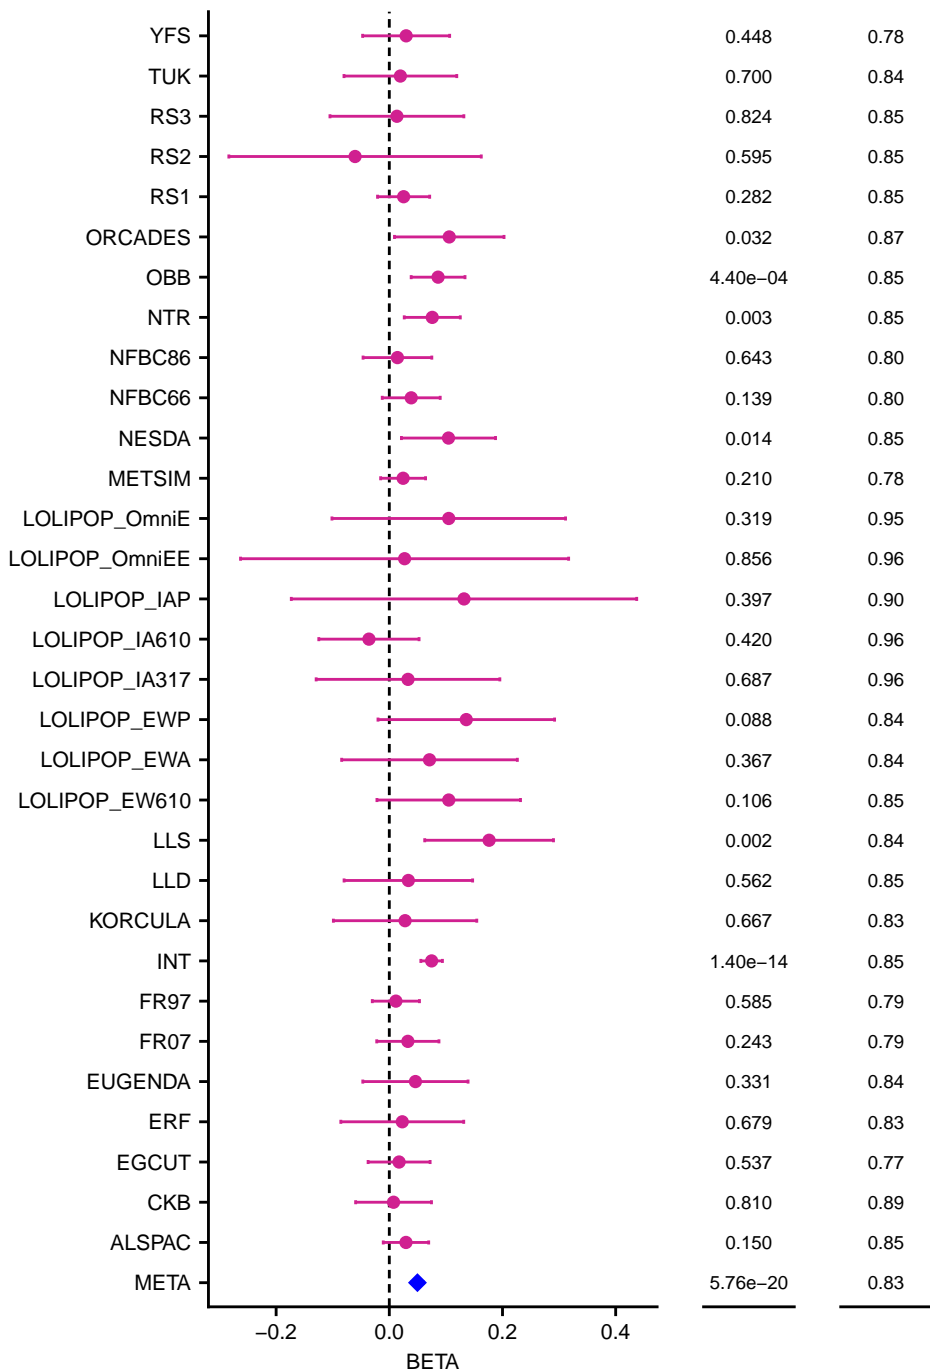

## chr12:47195056:C Gln

P-value

EAF

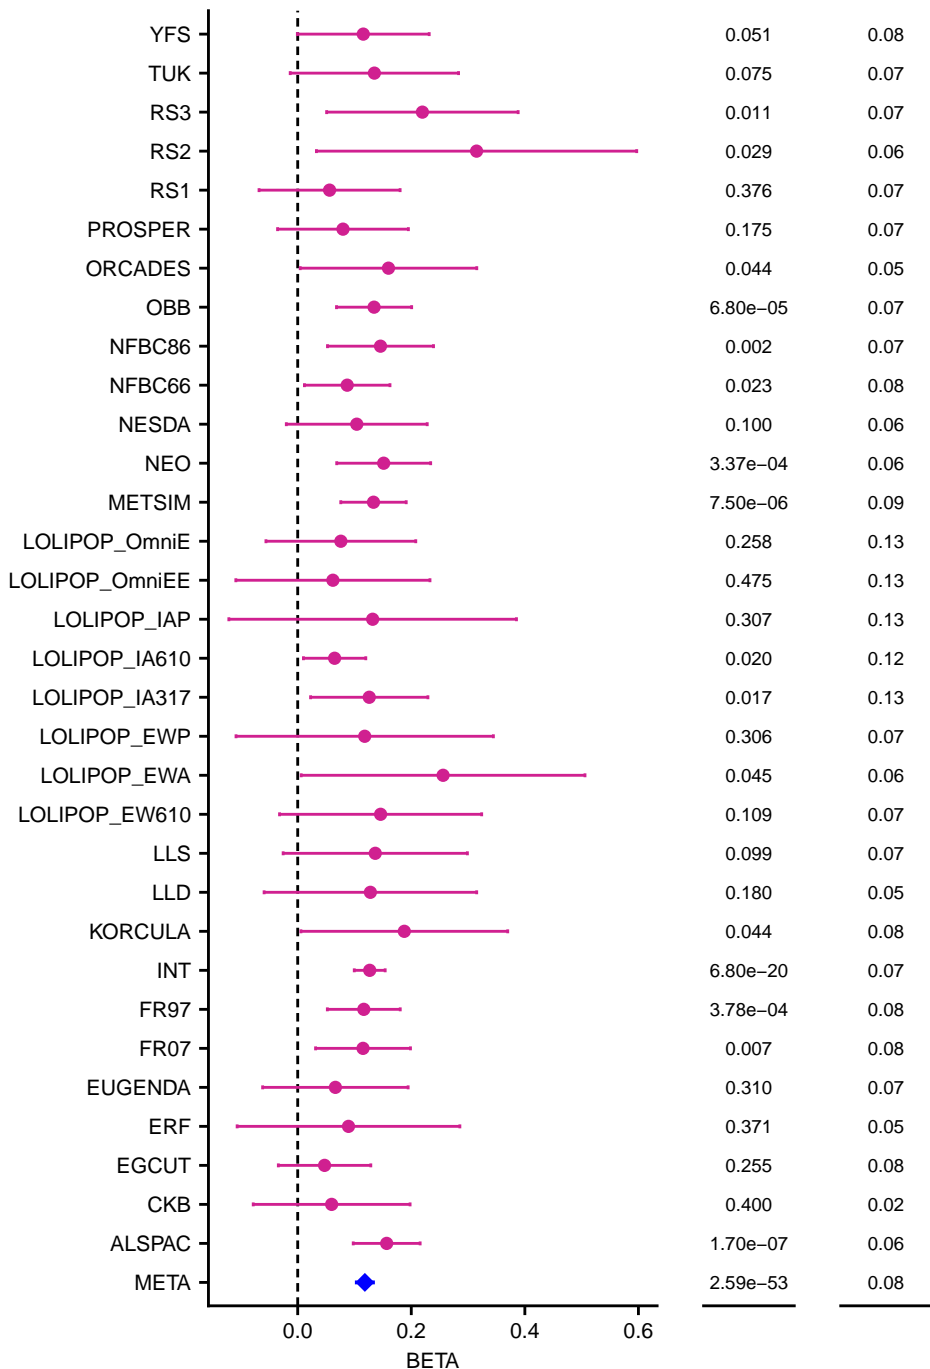



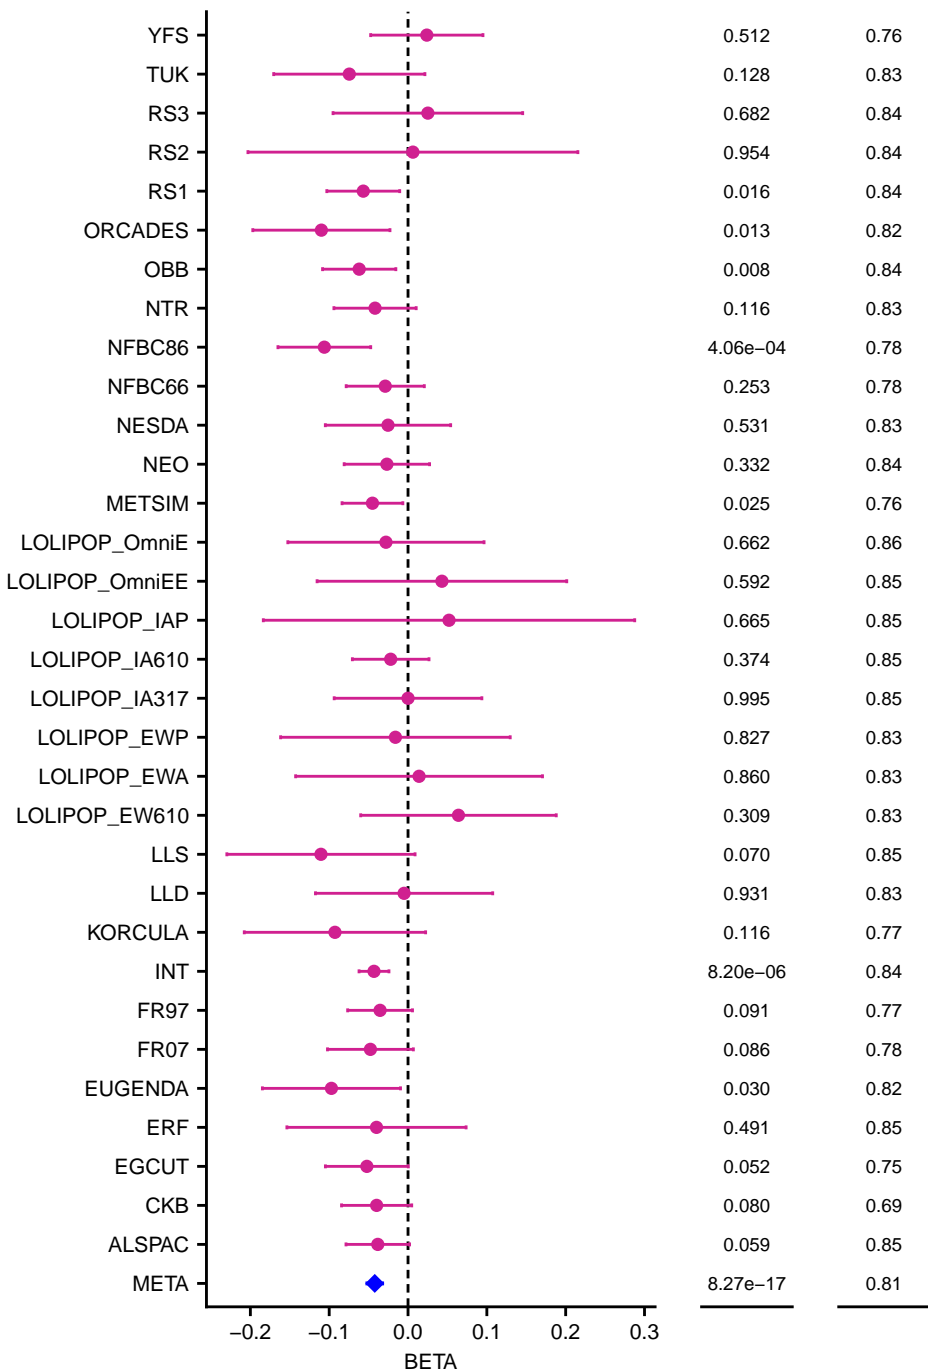

chr12:56861458:A Gln

P-value

EAF

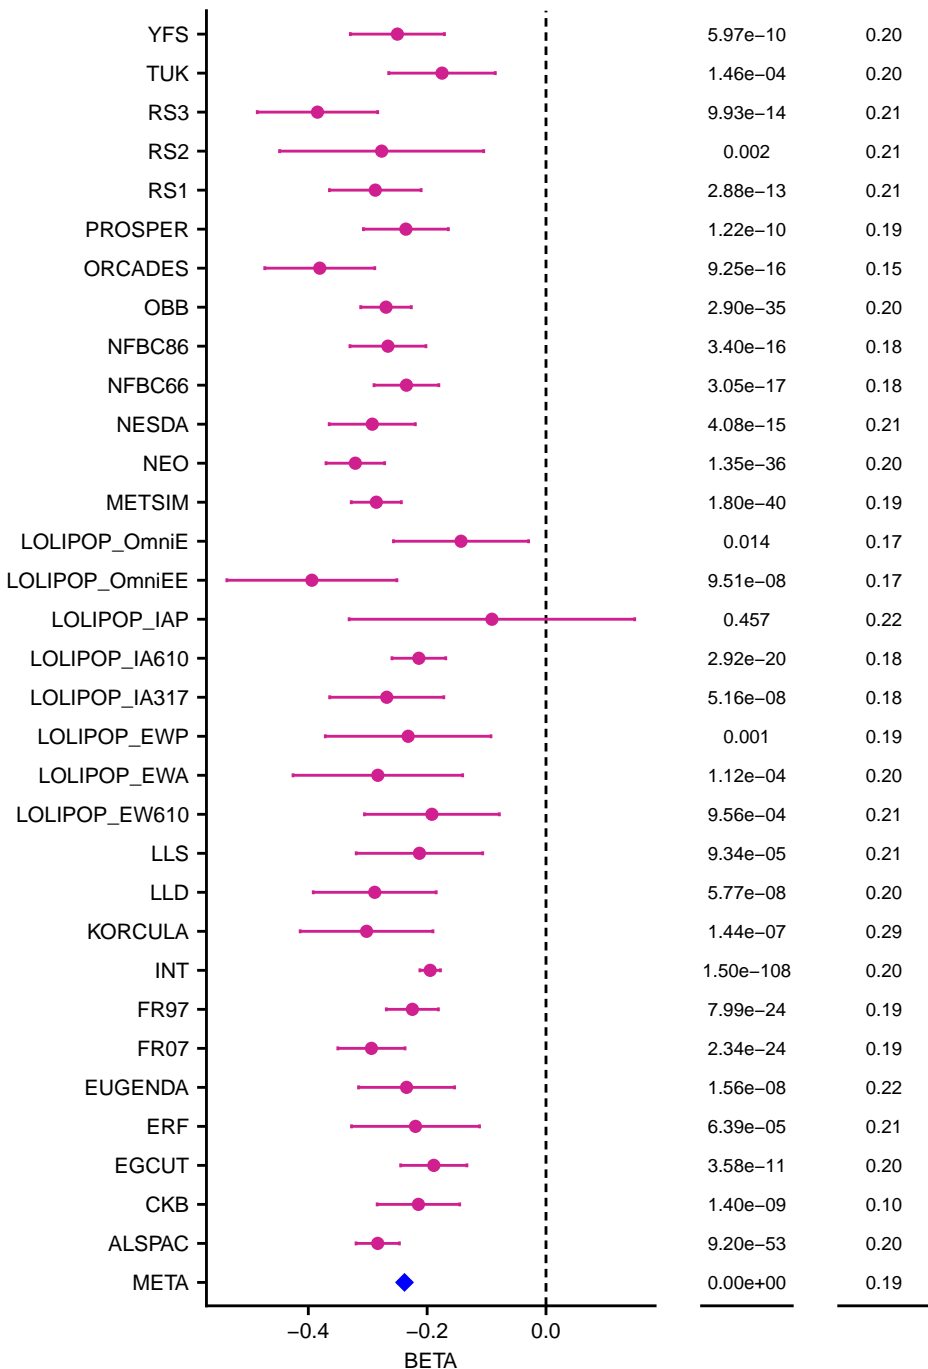

chr12:59904793:T Gln

P-value

EAF

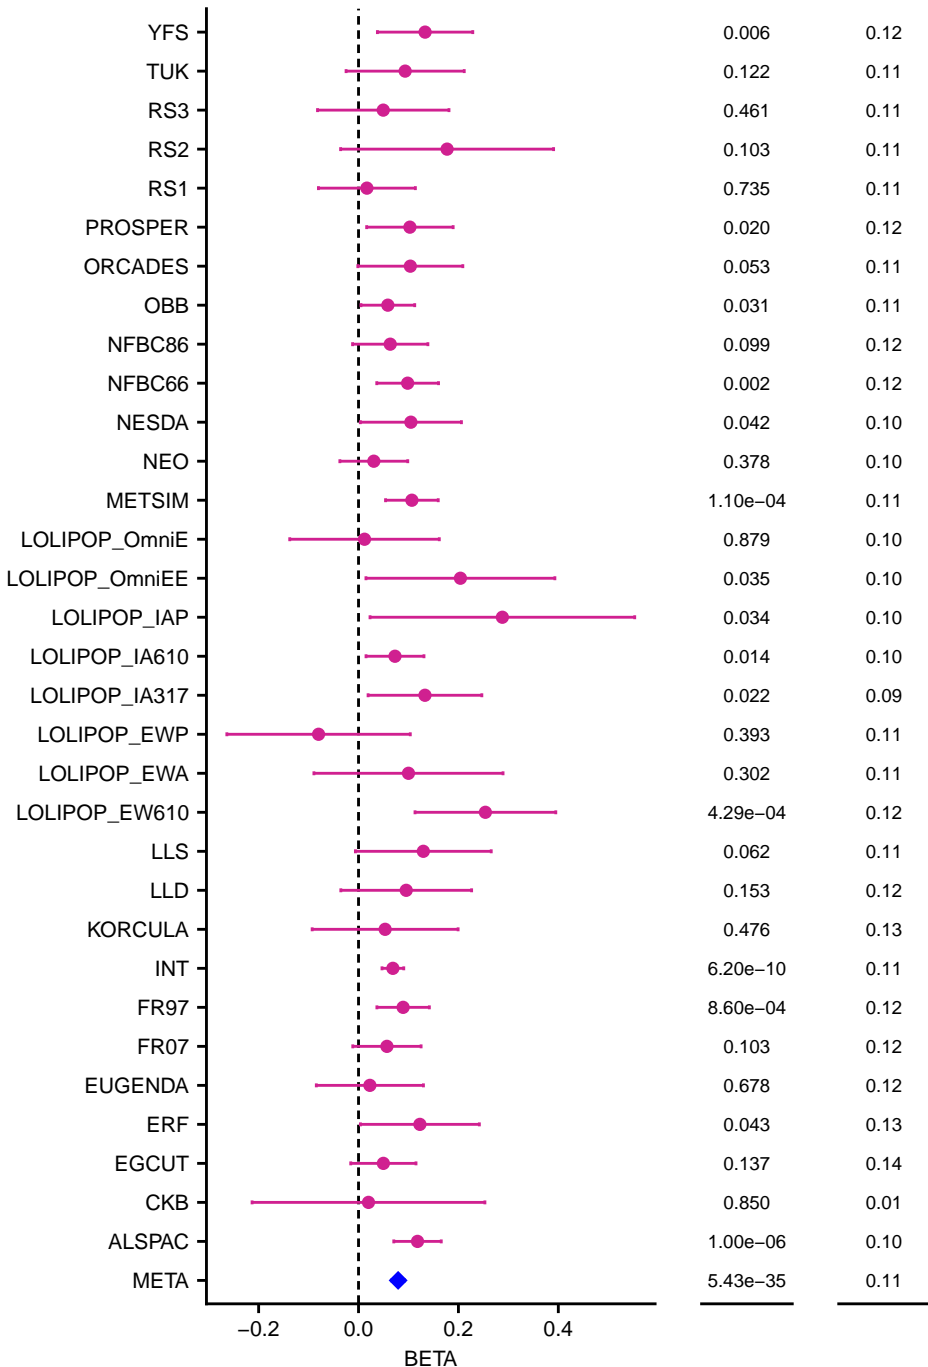

chr12:96371731:T His

P-value

EAF

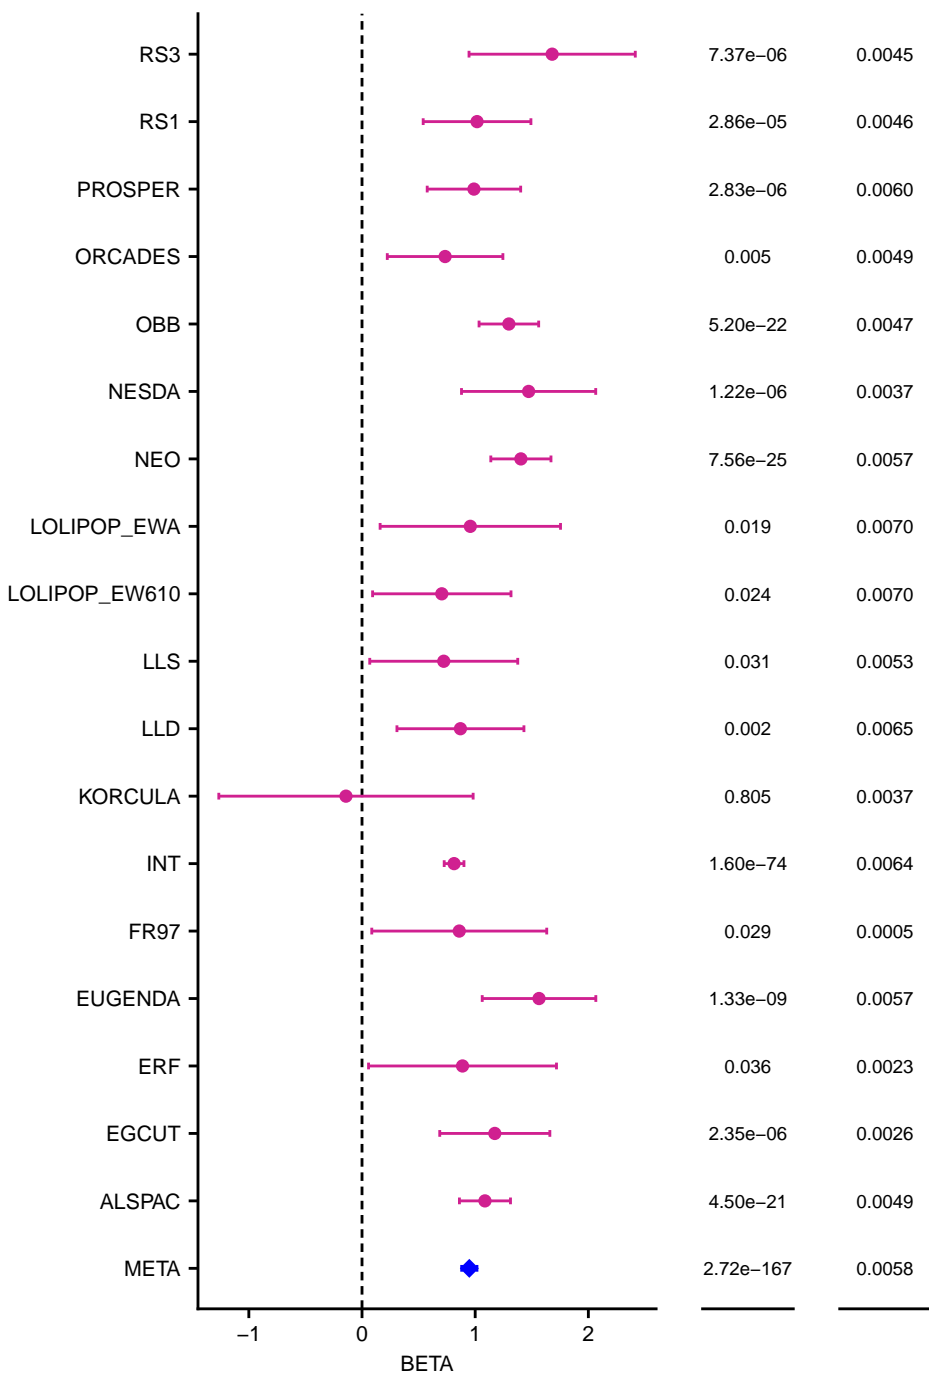

chr12:103244013:T Phe

P-value

EAF

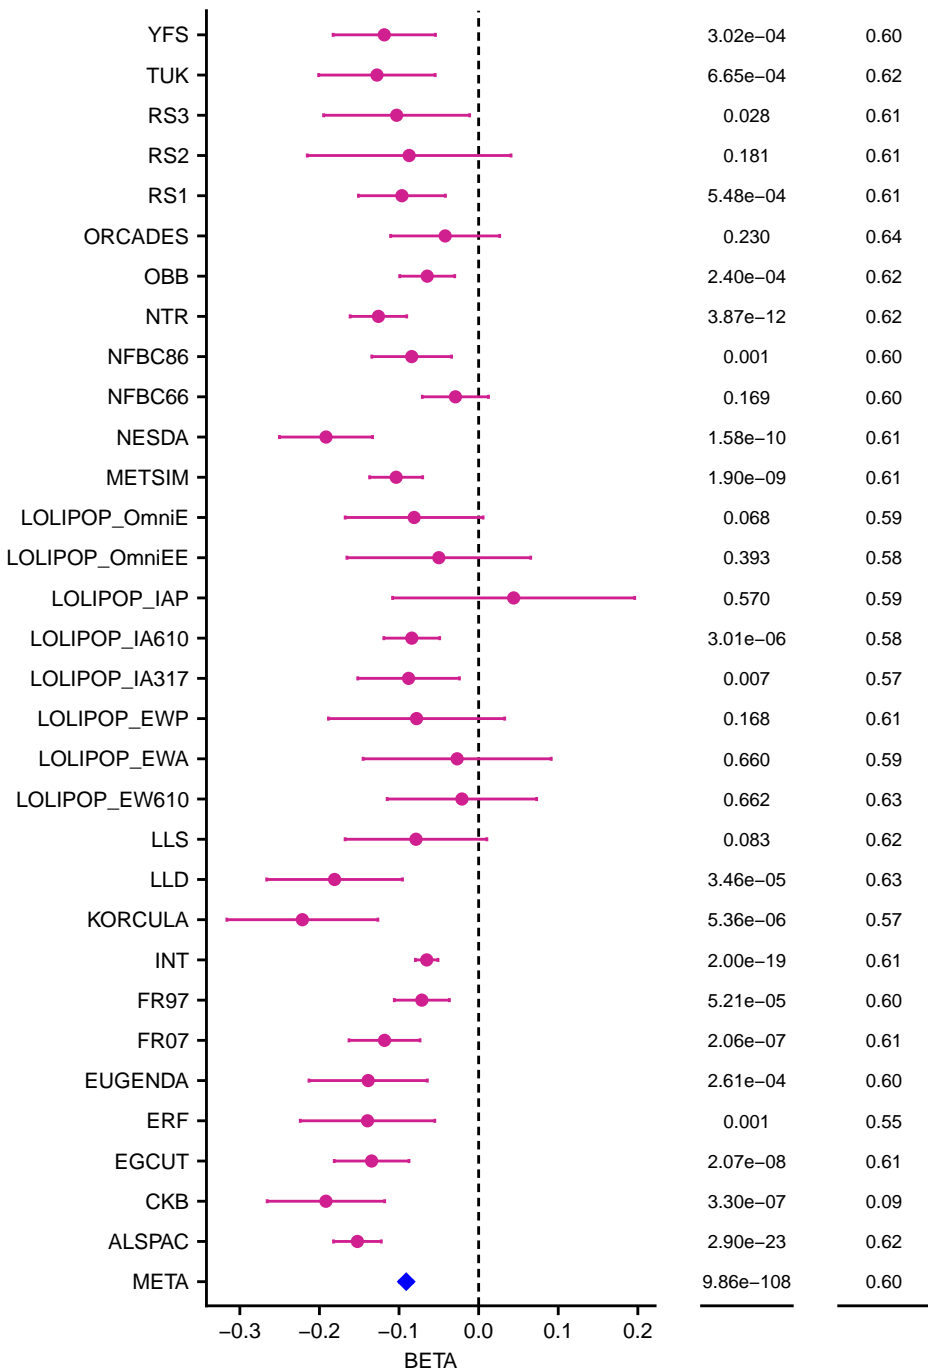

## chr12:110015893:A HDL-D

P-value

EAF

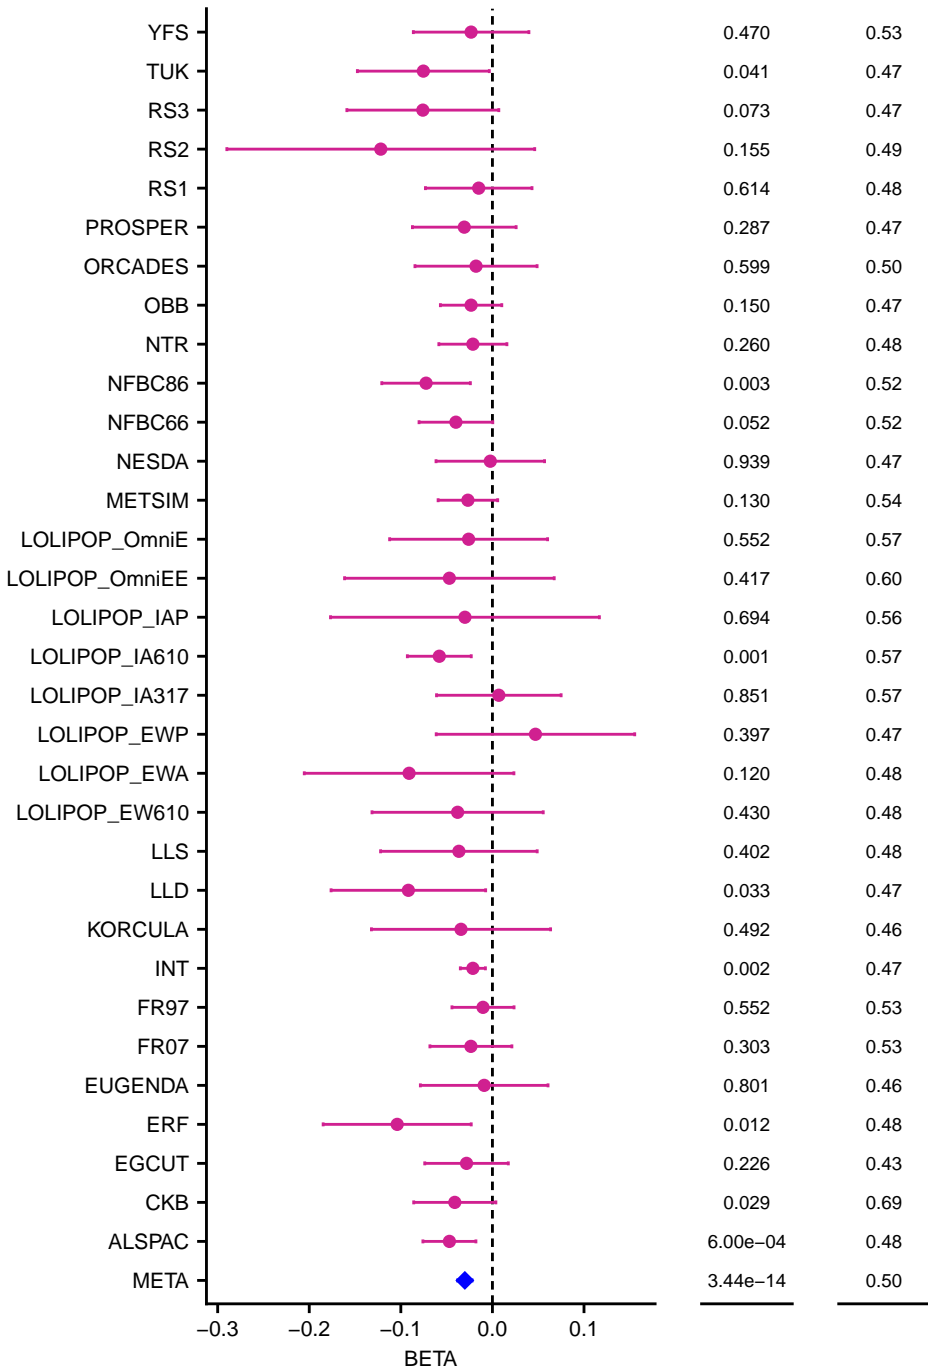

chr12:111865049:C SM

P-value

EAF

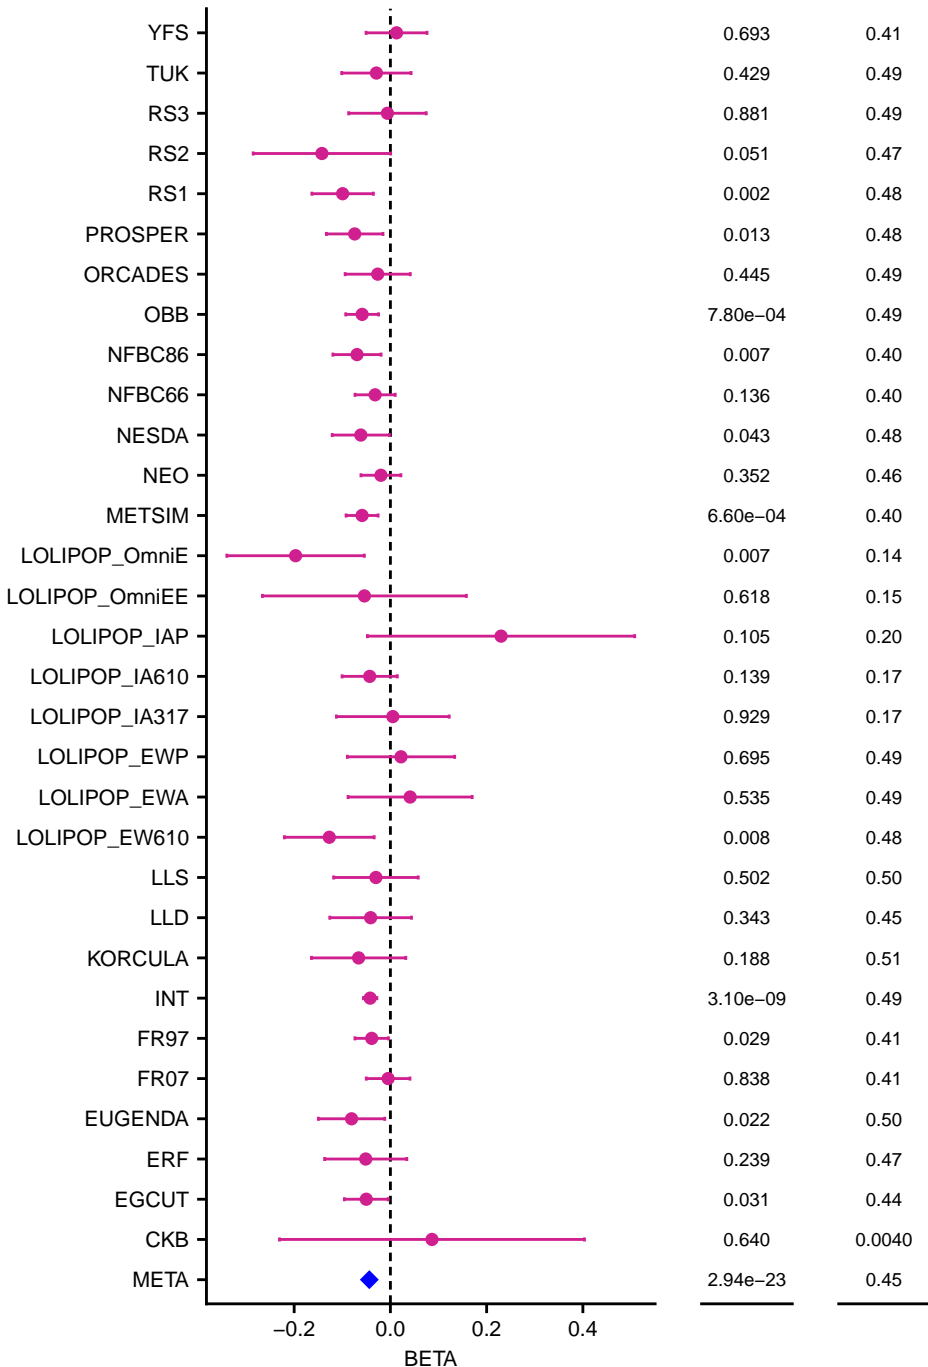

## chr12:121423956:T Tyr

P-value

EAF

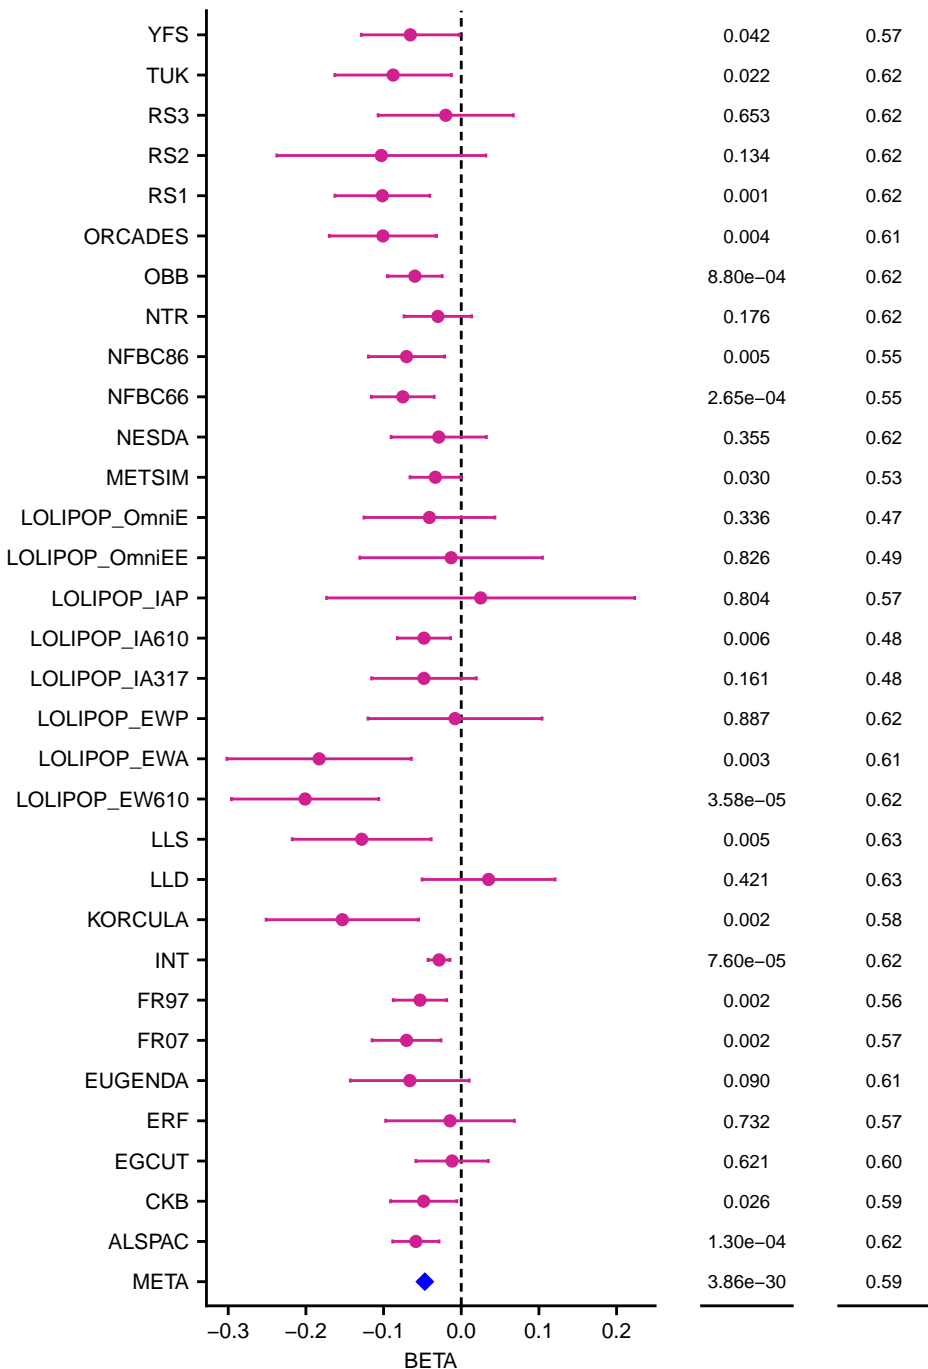



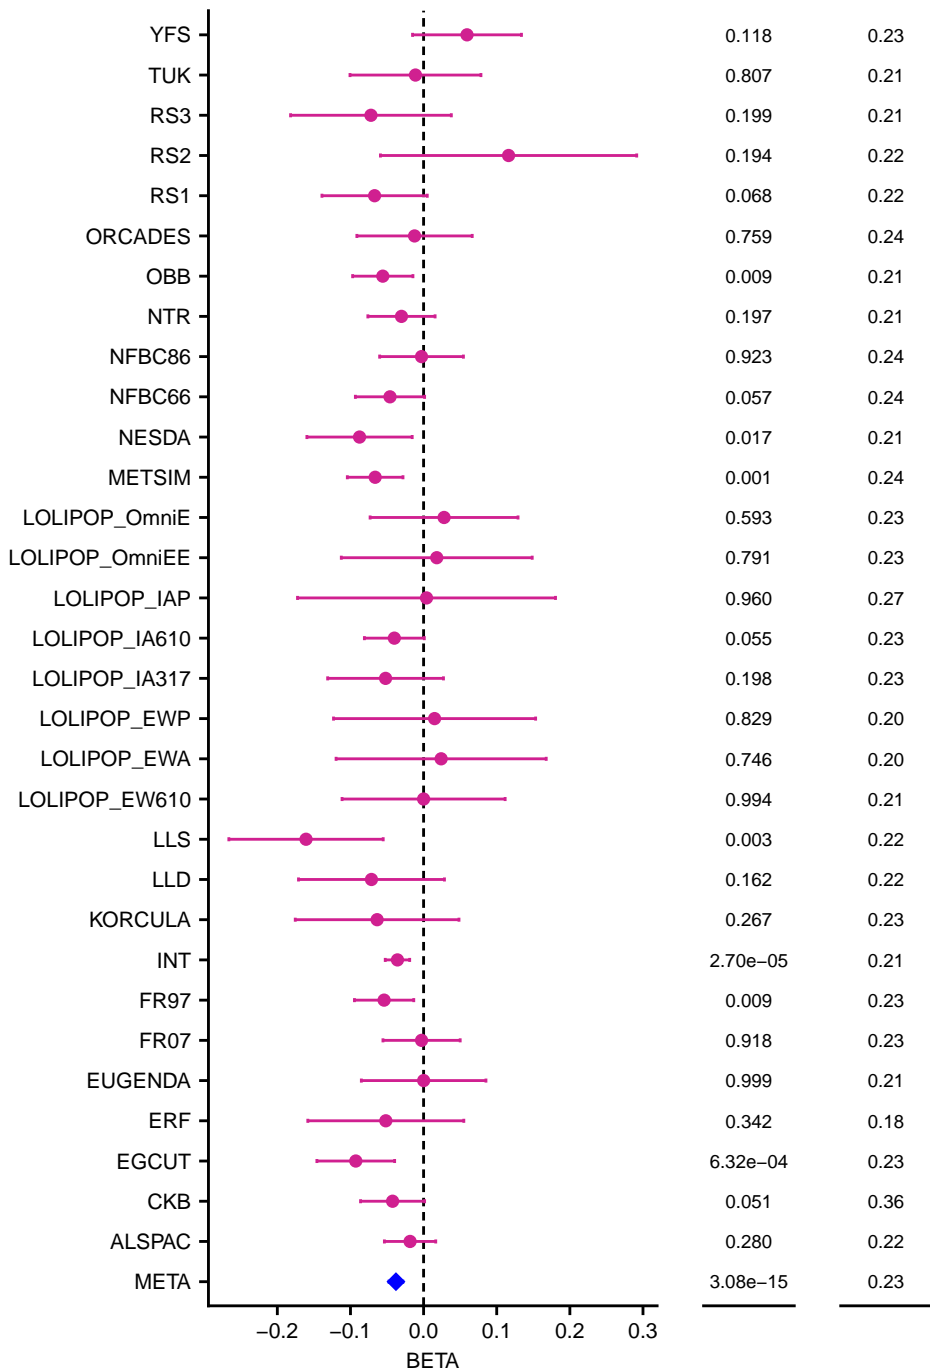

## chr13:72345089:T Crea

P-value

EAF

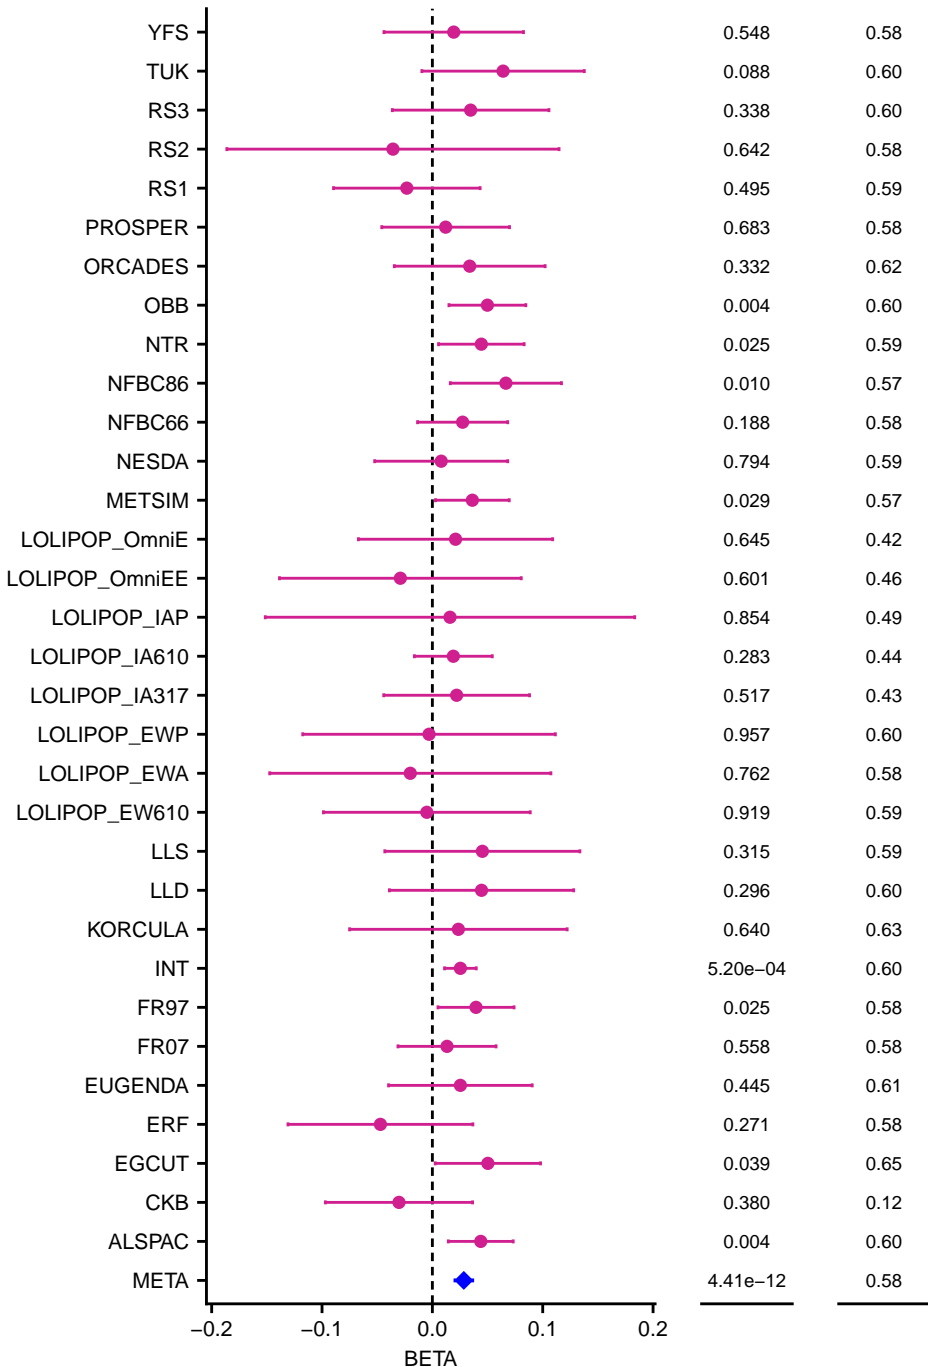

chr13:95268140:C S-HDL-C\_percent

P-value

EAF

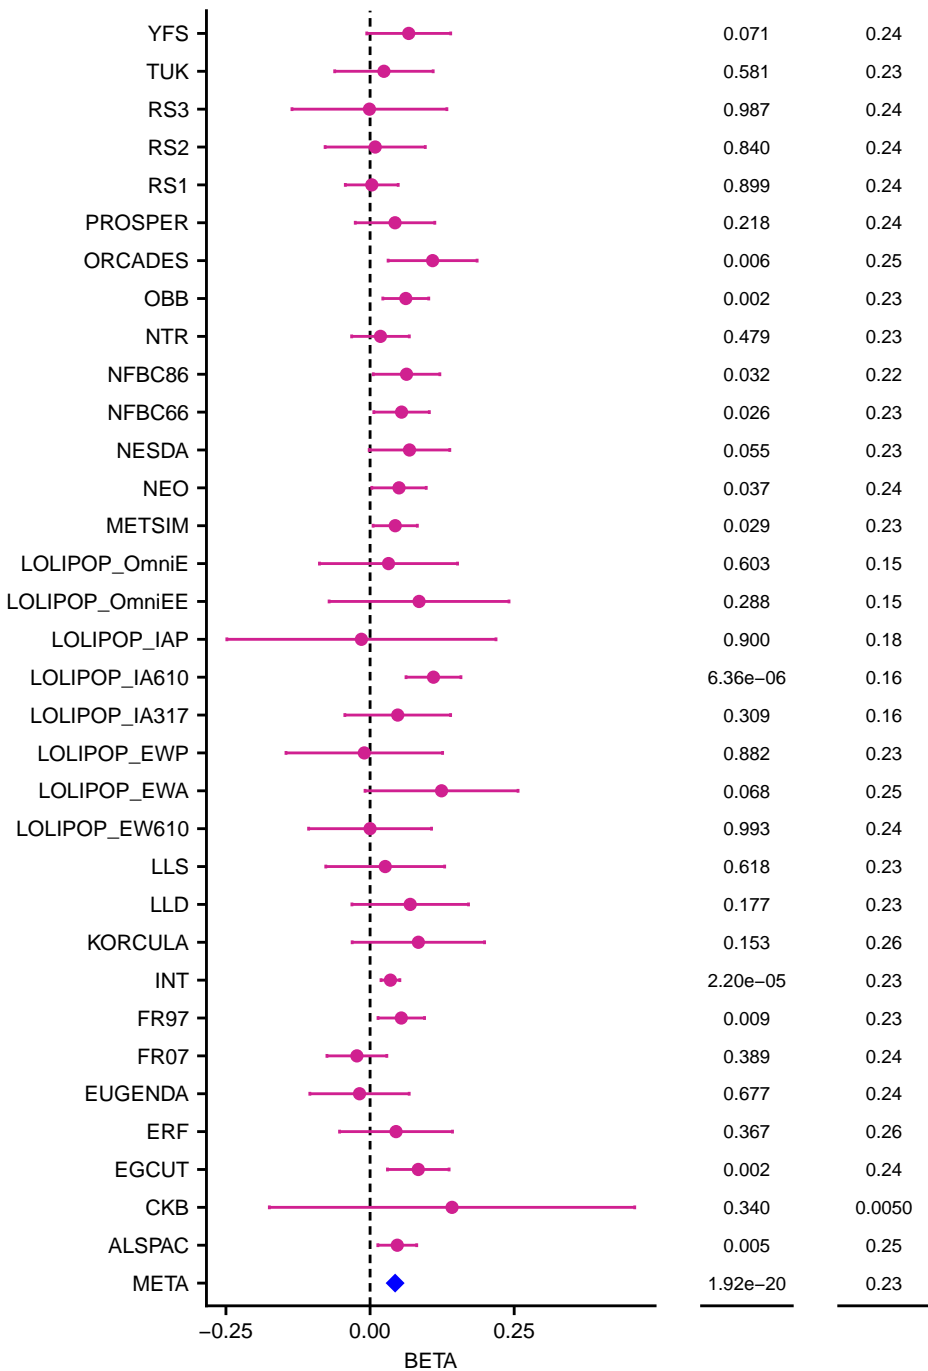

chr13:114551993:T XS-VLDL-TG

P-value

EAF

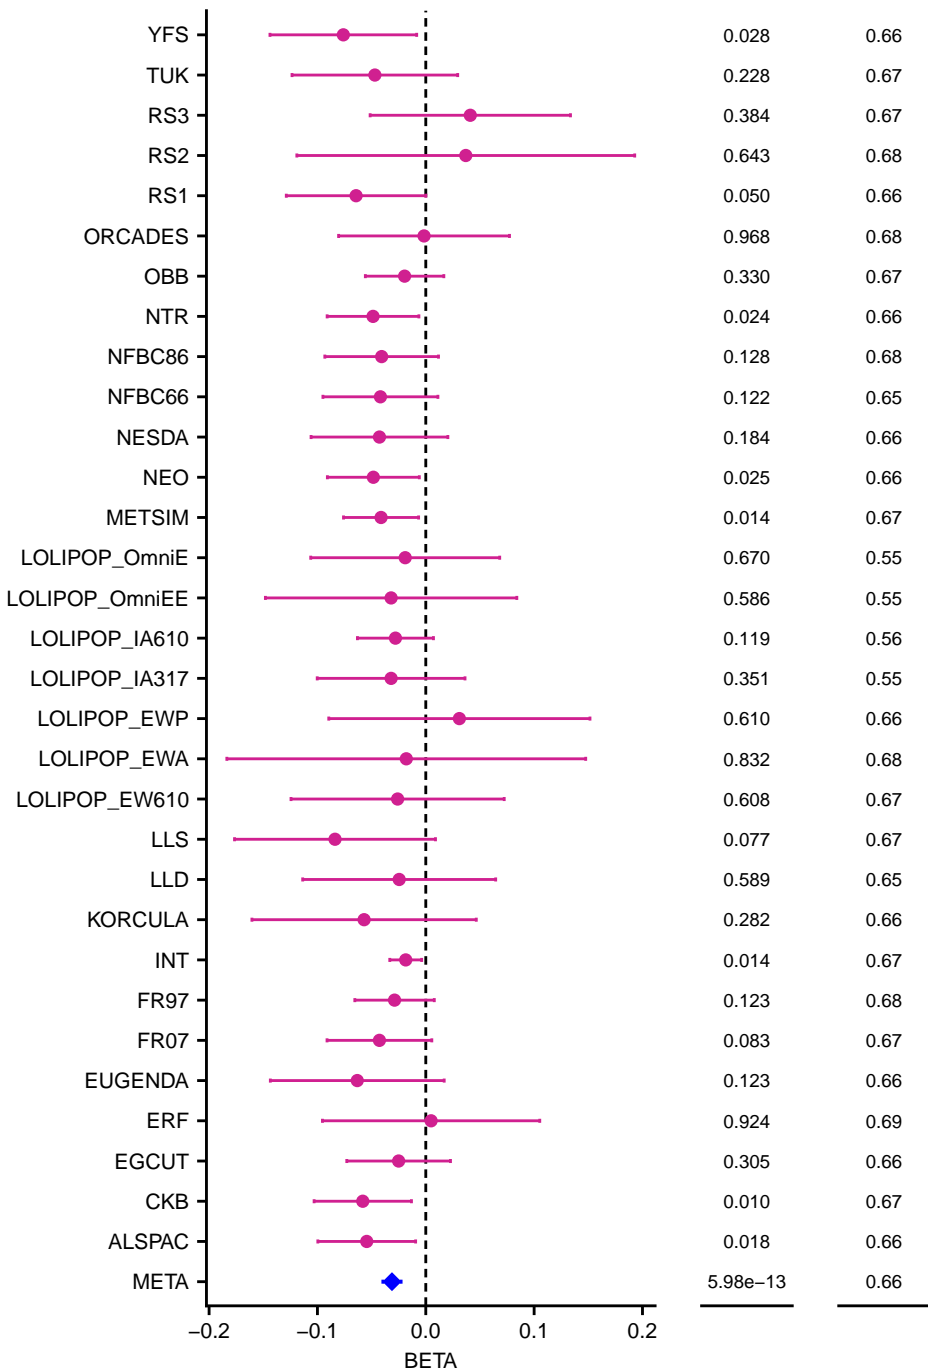

chr14:21492229:A His

P-value

EAF

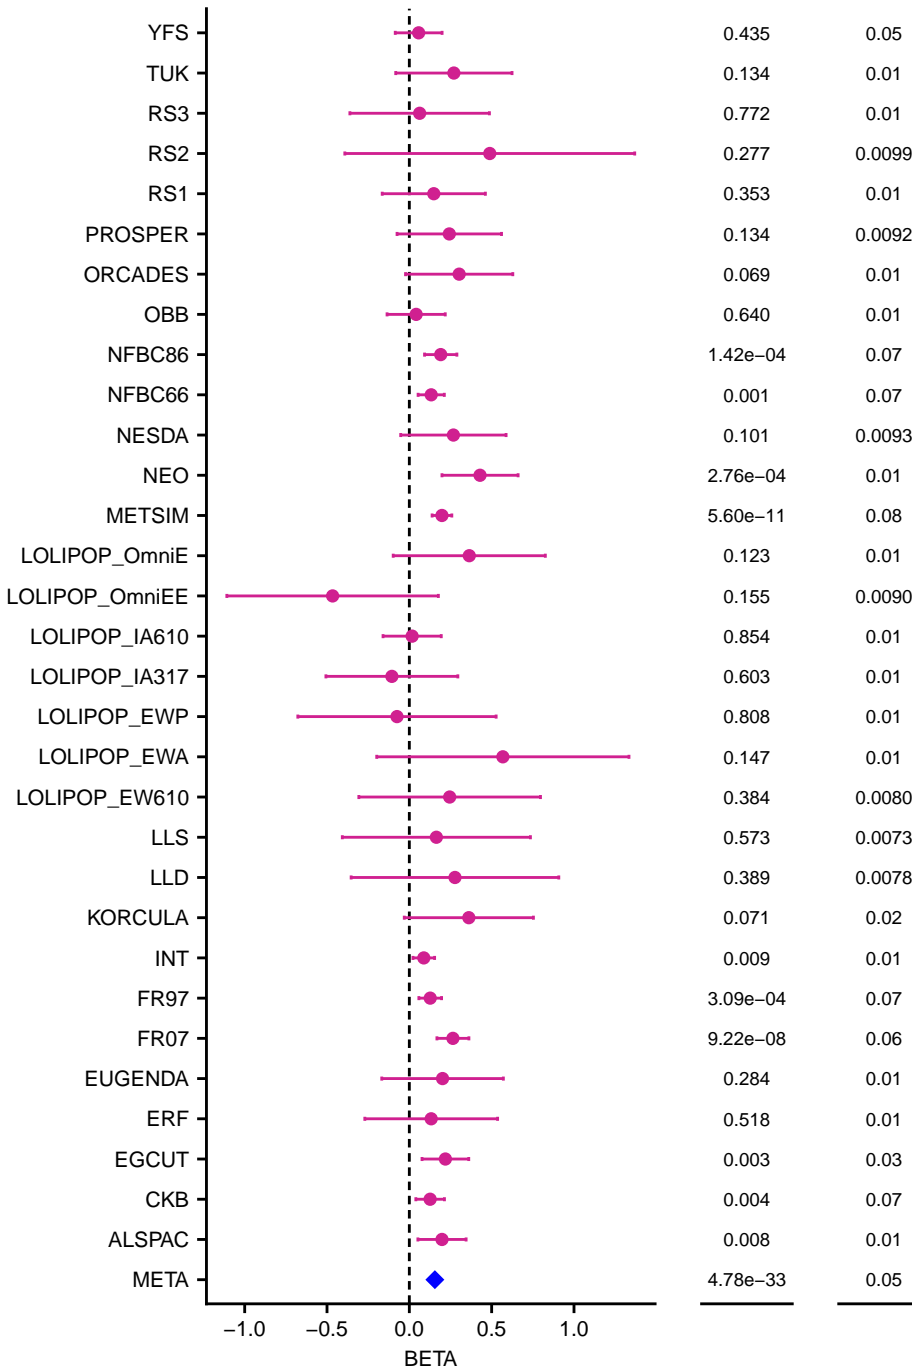

chr14:24872209:T His

P-value

EAF

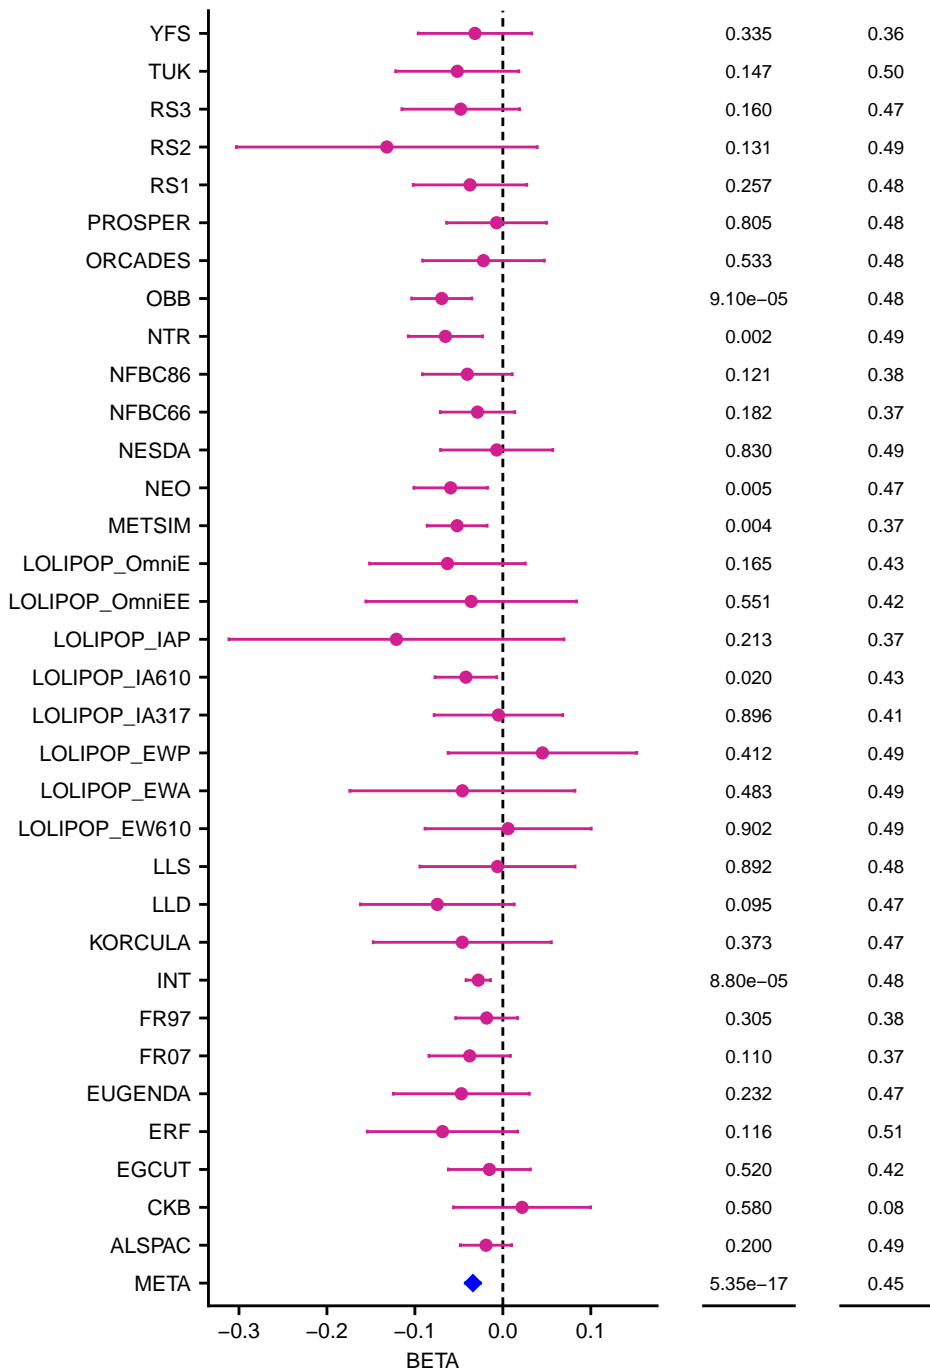

## chr14:55425913:C Phe

P-value

EAF

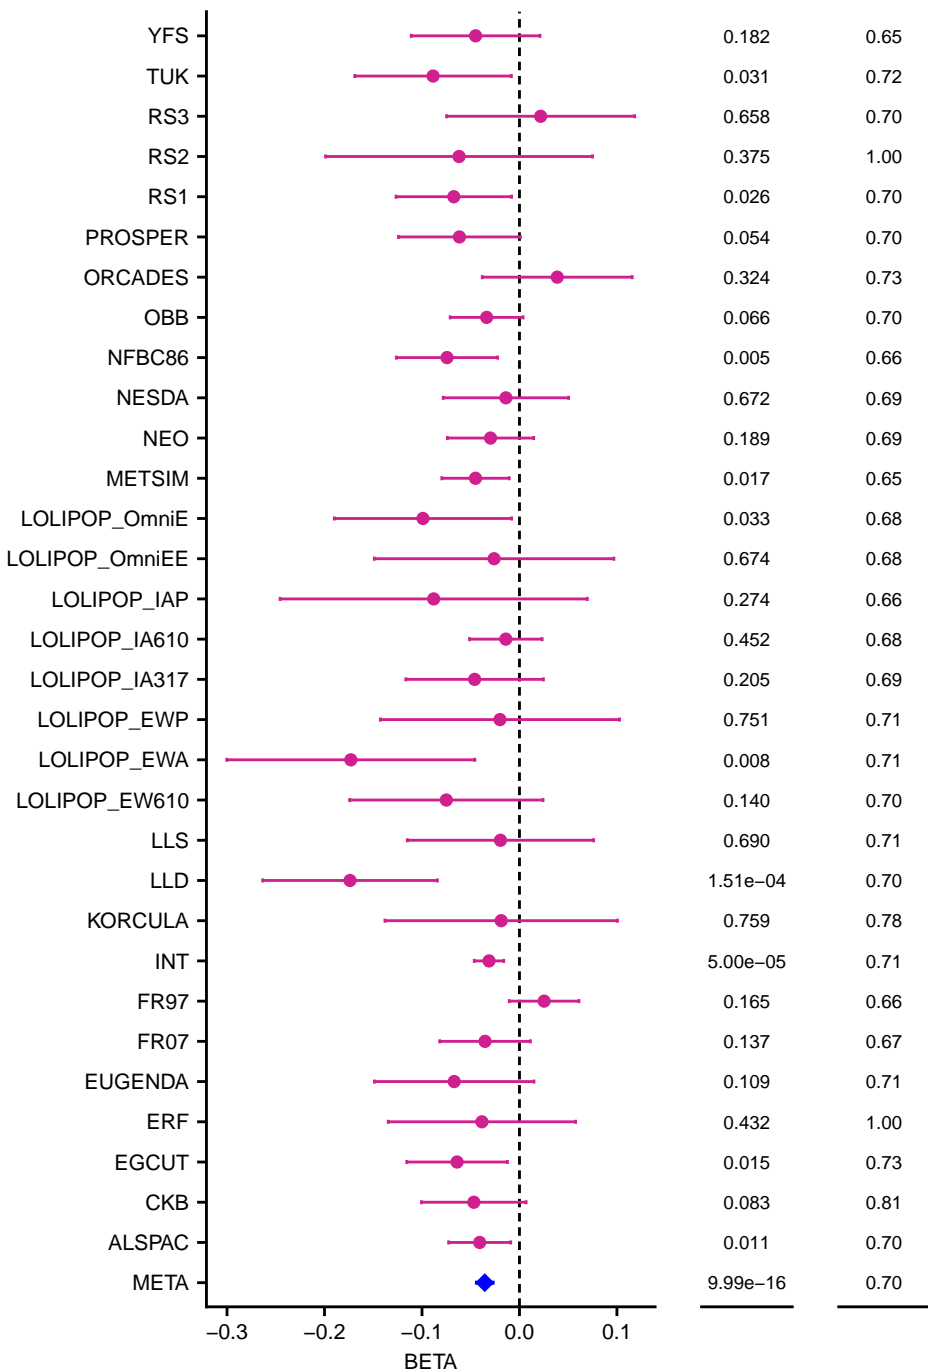

chr14:64232220:A SM

P-value

EAF

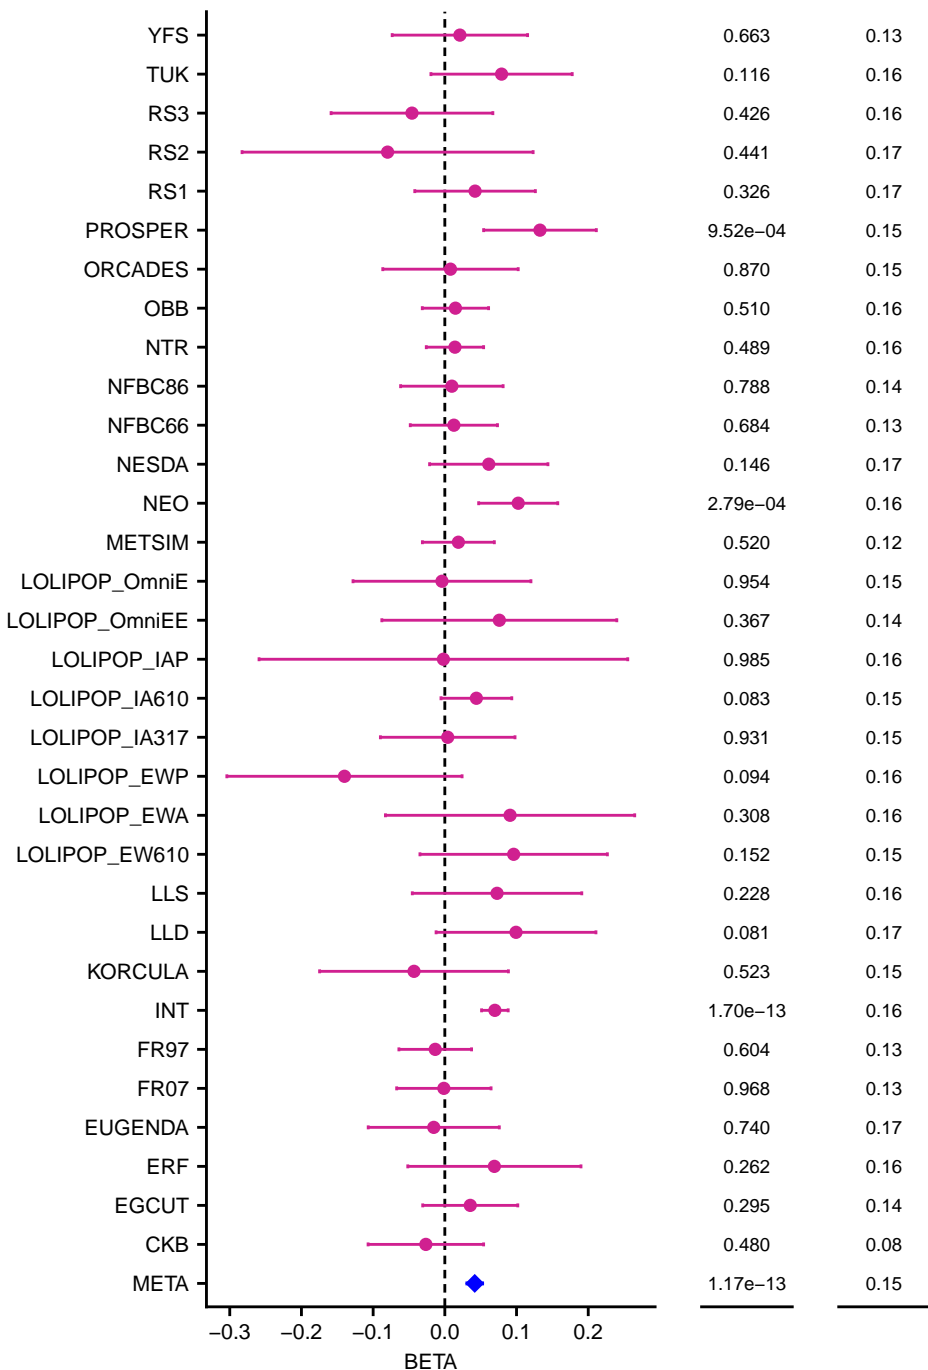



## chr14:70845670:T S-LDL-PL\_percent

P-value

EAF

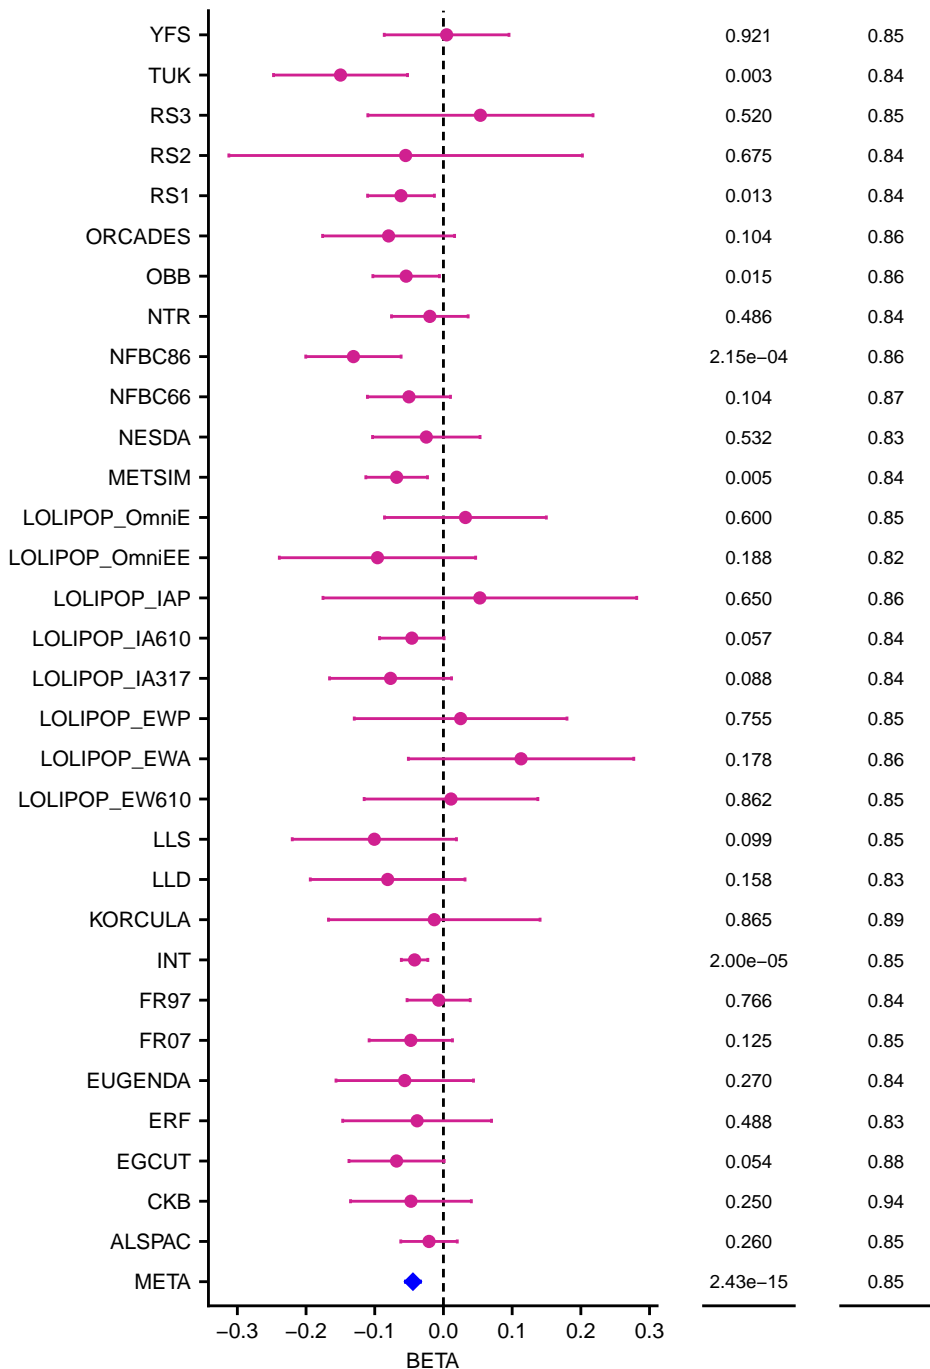

chr14:75343877:T Ala

P-value

EAF

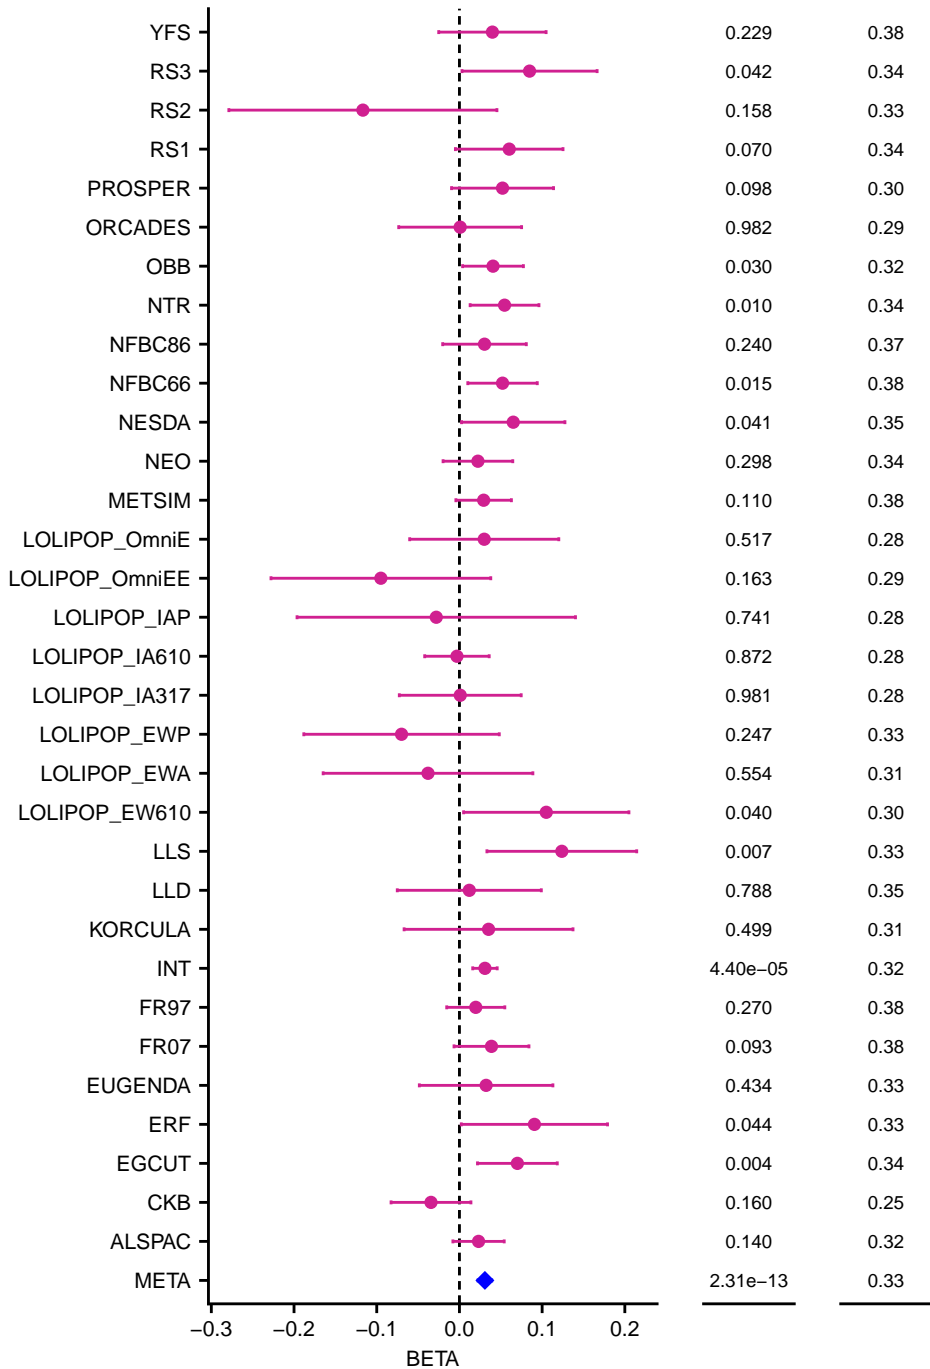

## chr14:94838142:T GlycA

P-value

EAF

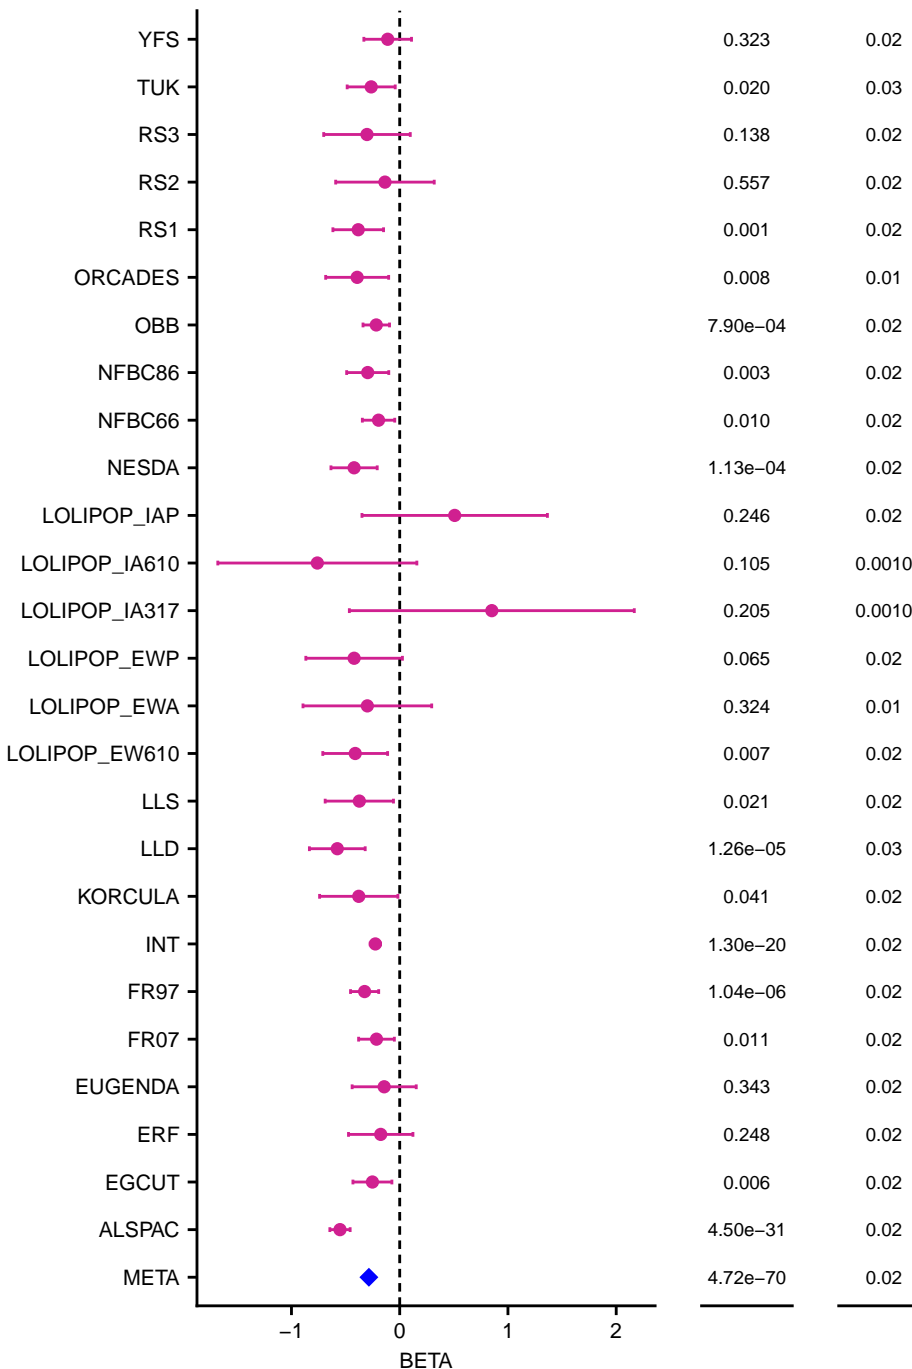

## chr14:100796401:T Gln

P-value

EAF

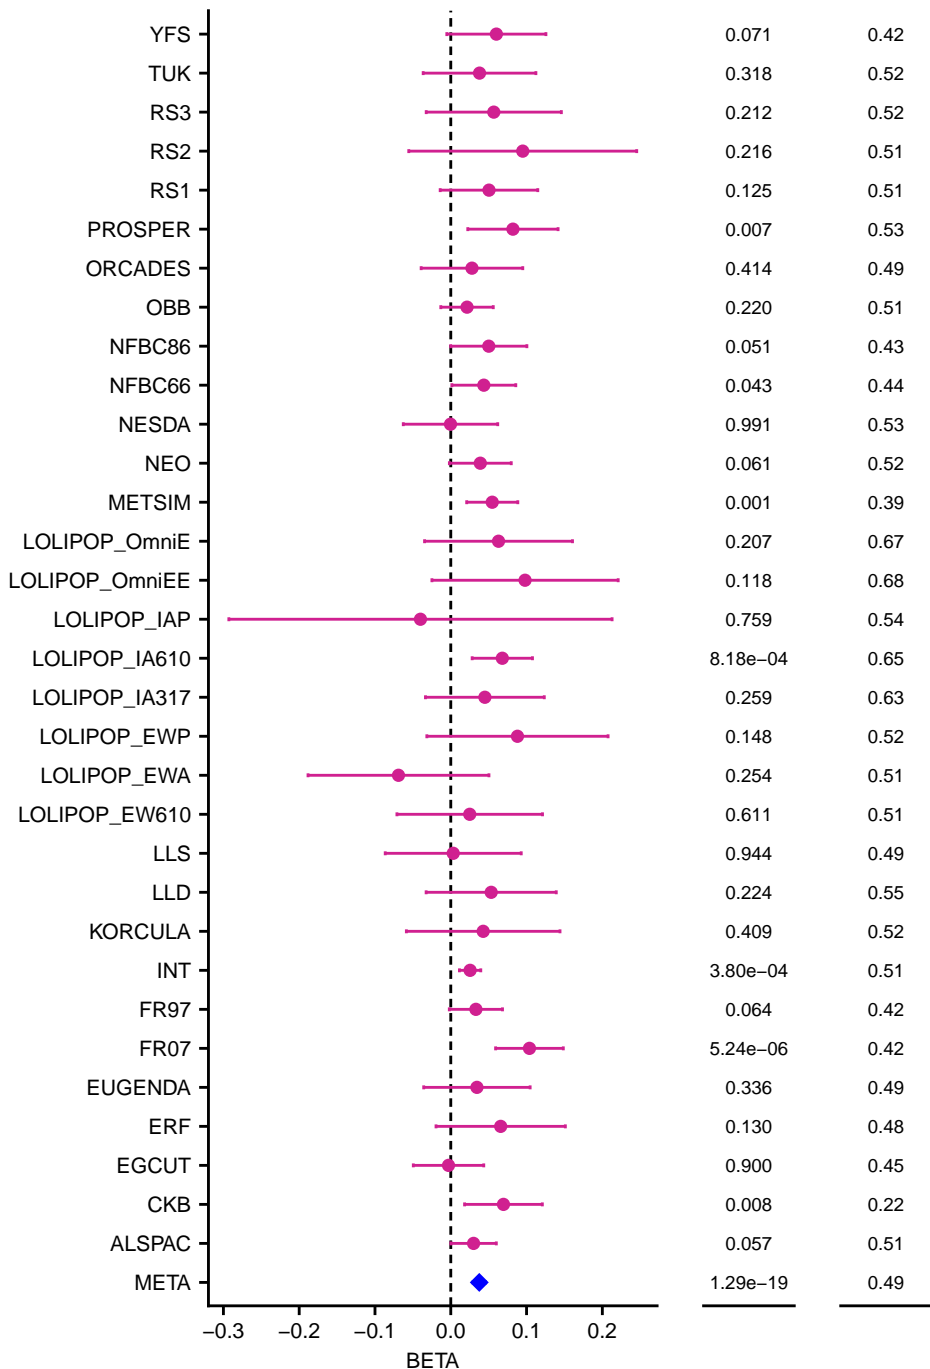

## chr14:103239026:A XL-HDL-C

P-value

EAF

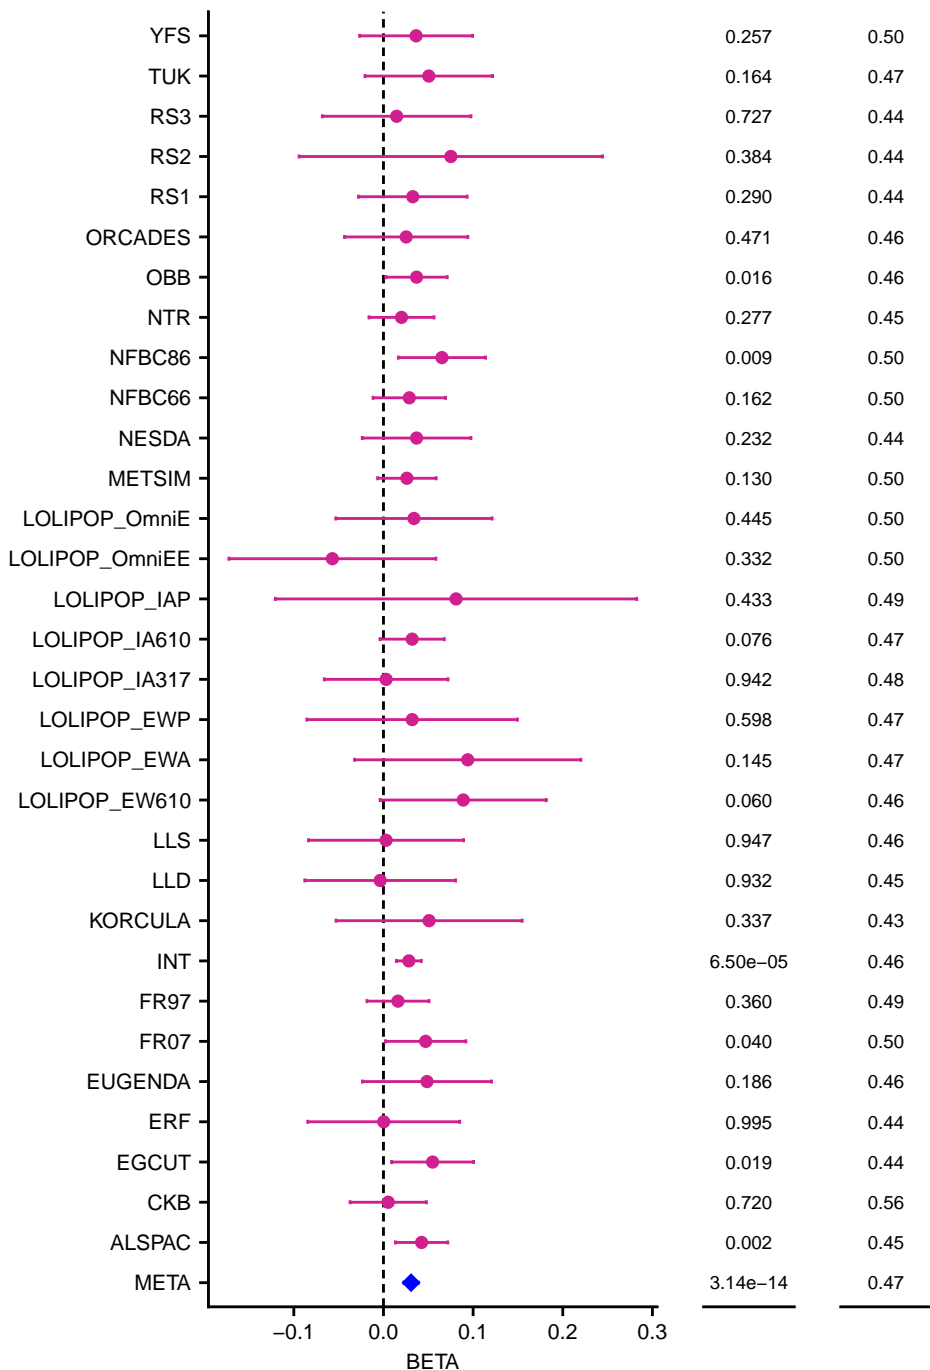

chr14:106233748:C LDL-D

P-value

EAF

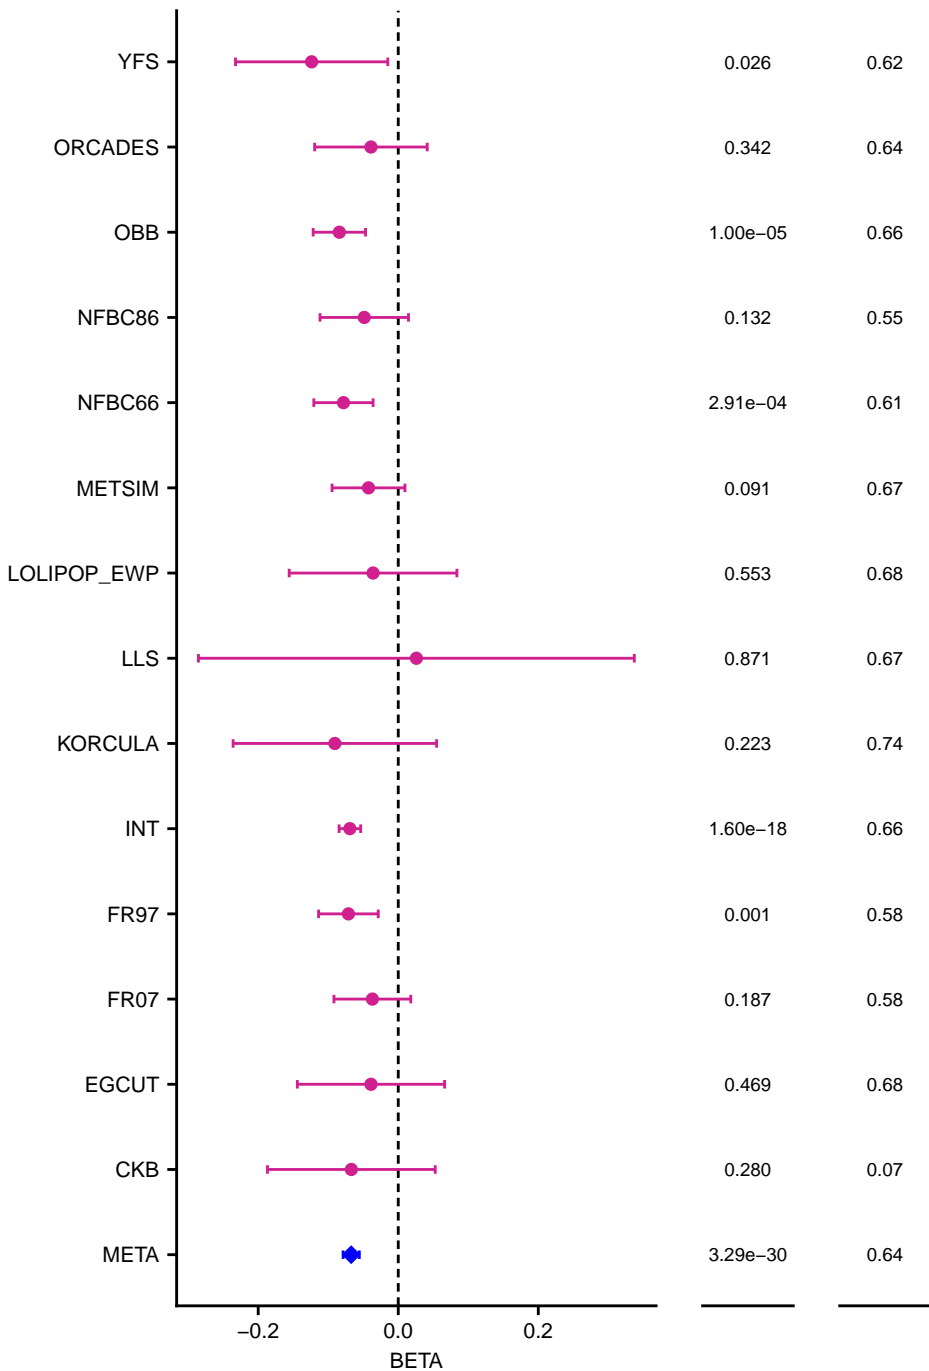

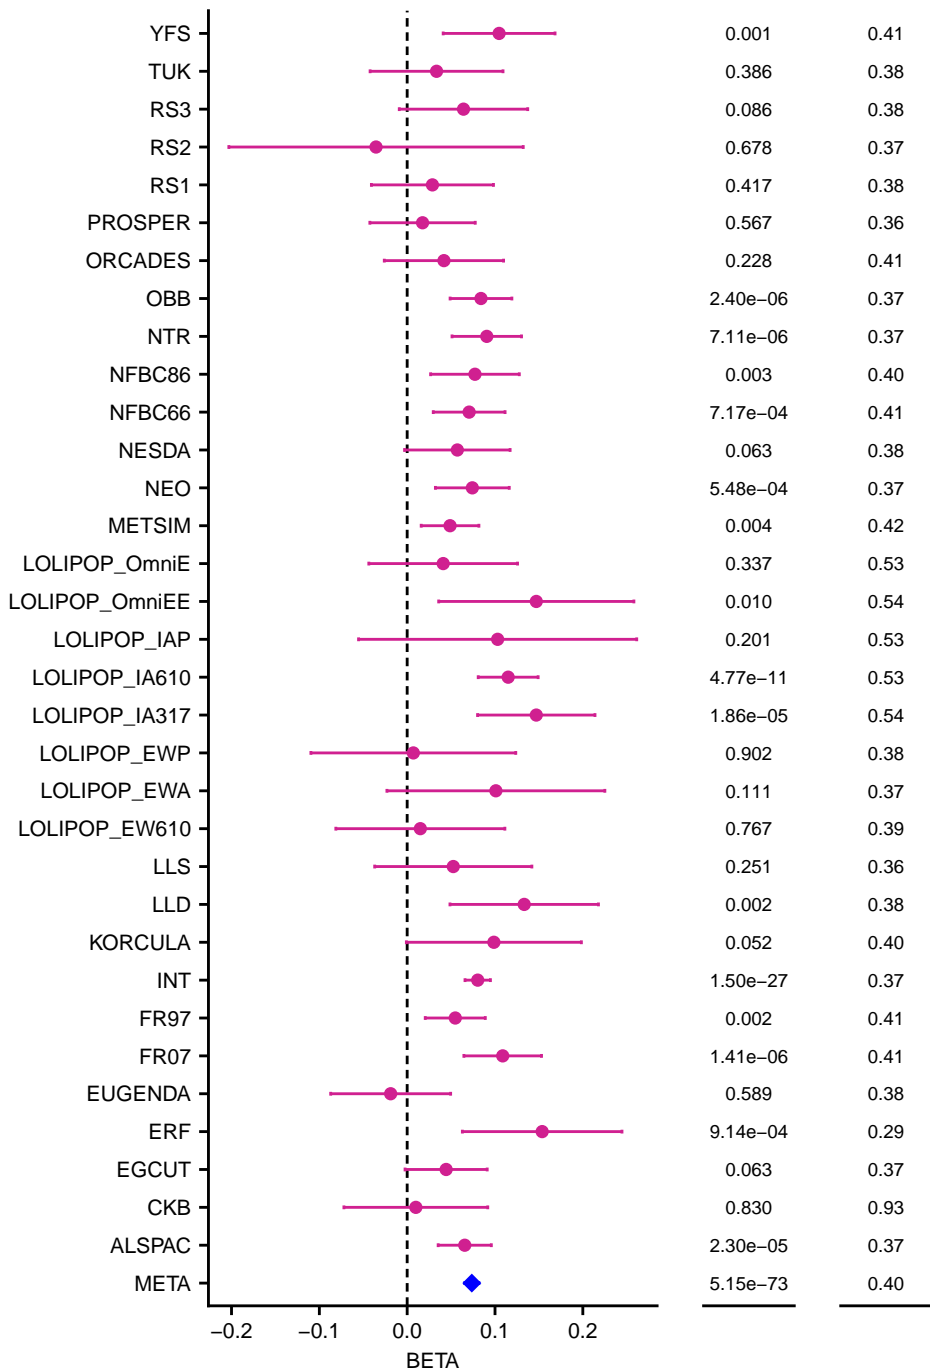

## chr15:58723939:A L-HDL-TG

P-value

EAF

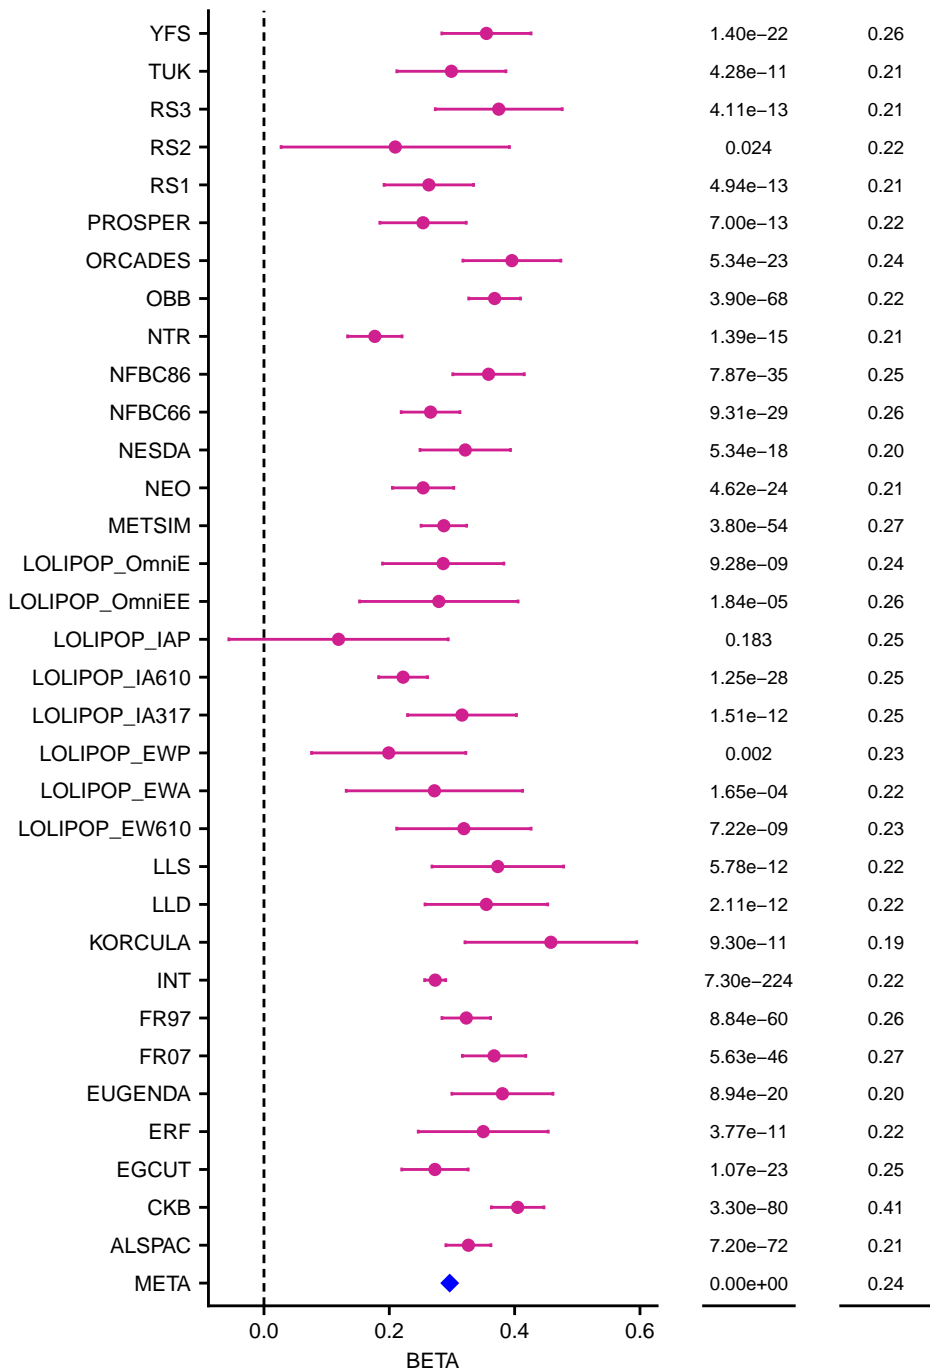



chr15:76304503:A Crea

P-value

EAF

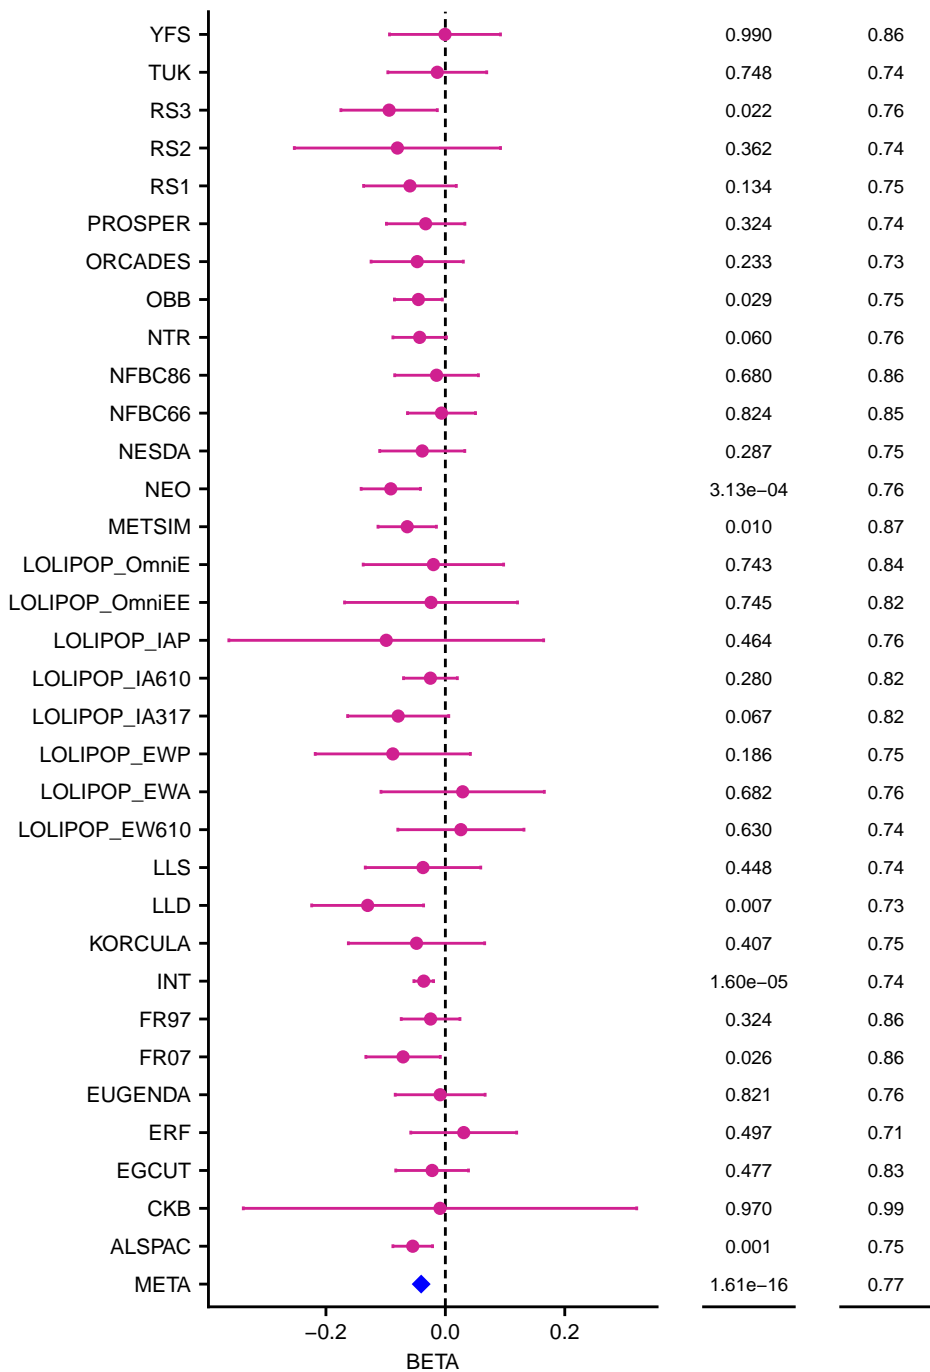

chr15:102068904:T S-HDL-PL\_percent

P-value

EAF

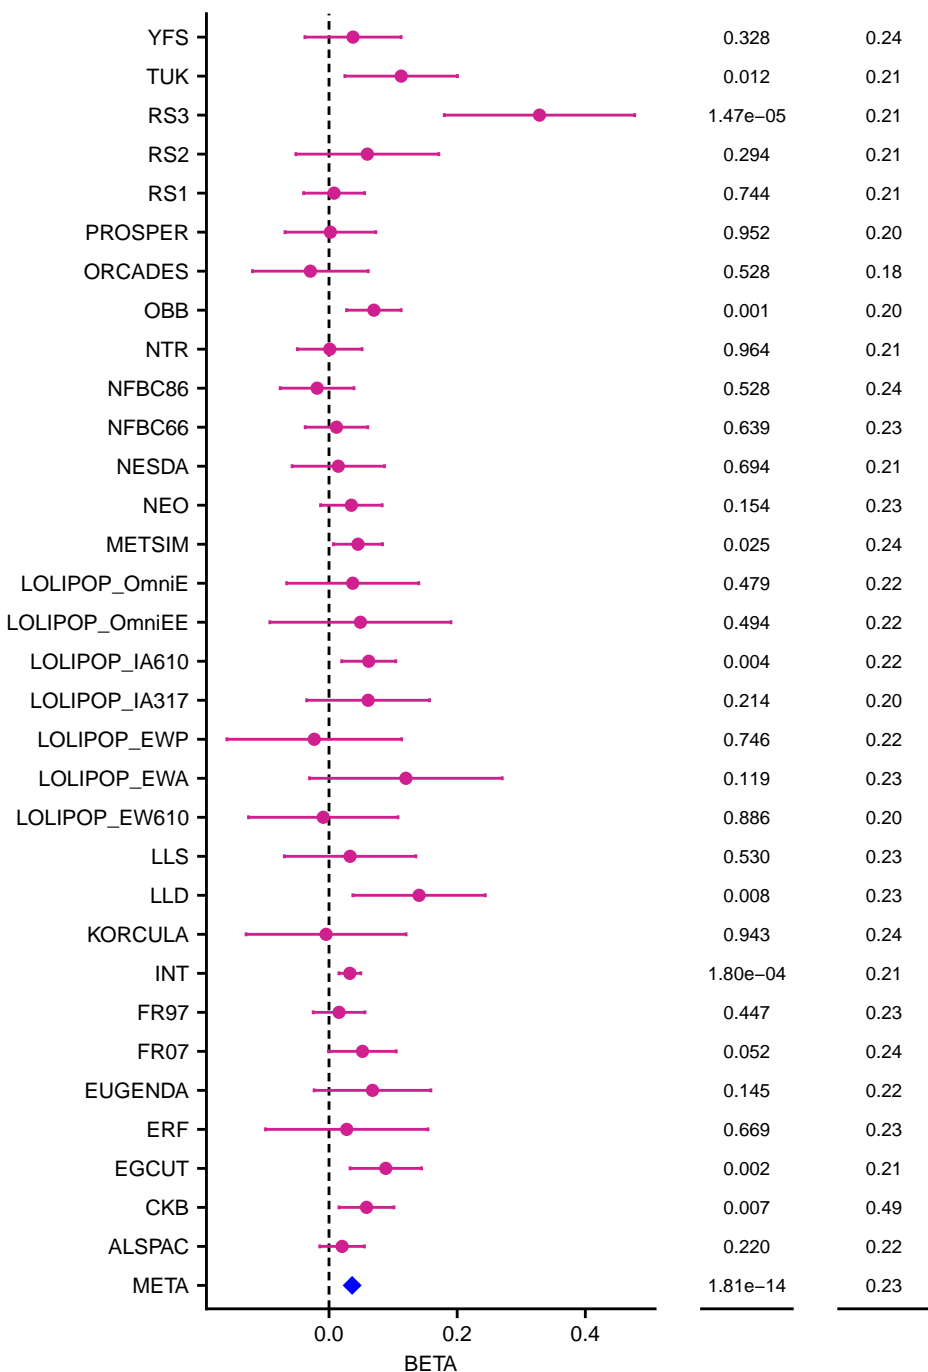

## chr16:11313515:A XL-HDL-CE

P-value

EAF

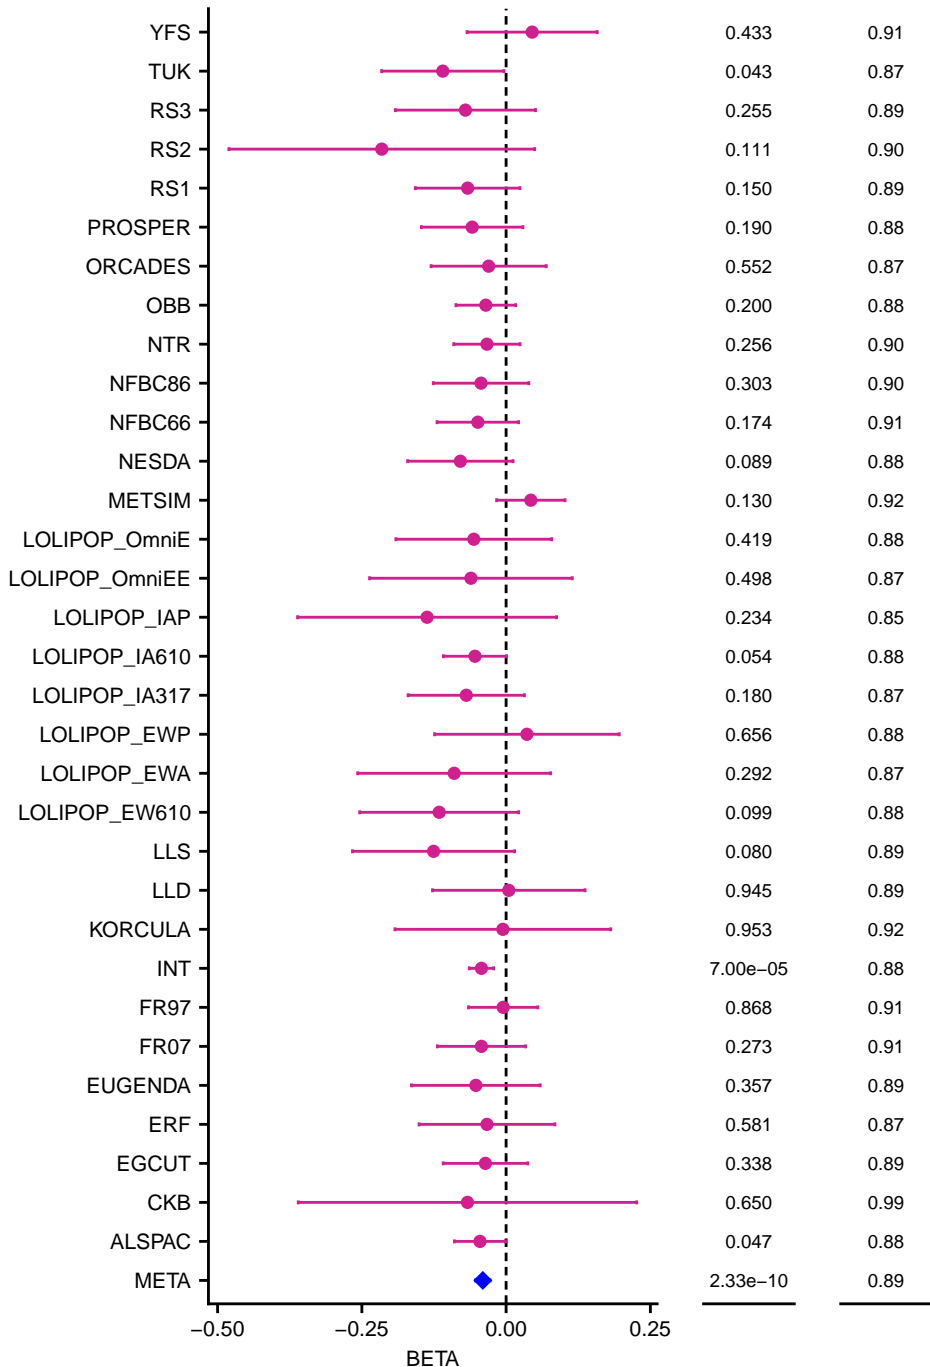

## chr16:15150505:A UnsatDeg

P-value

EAF

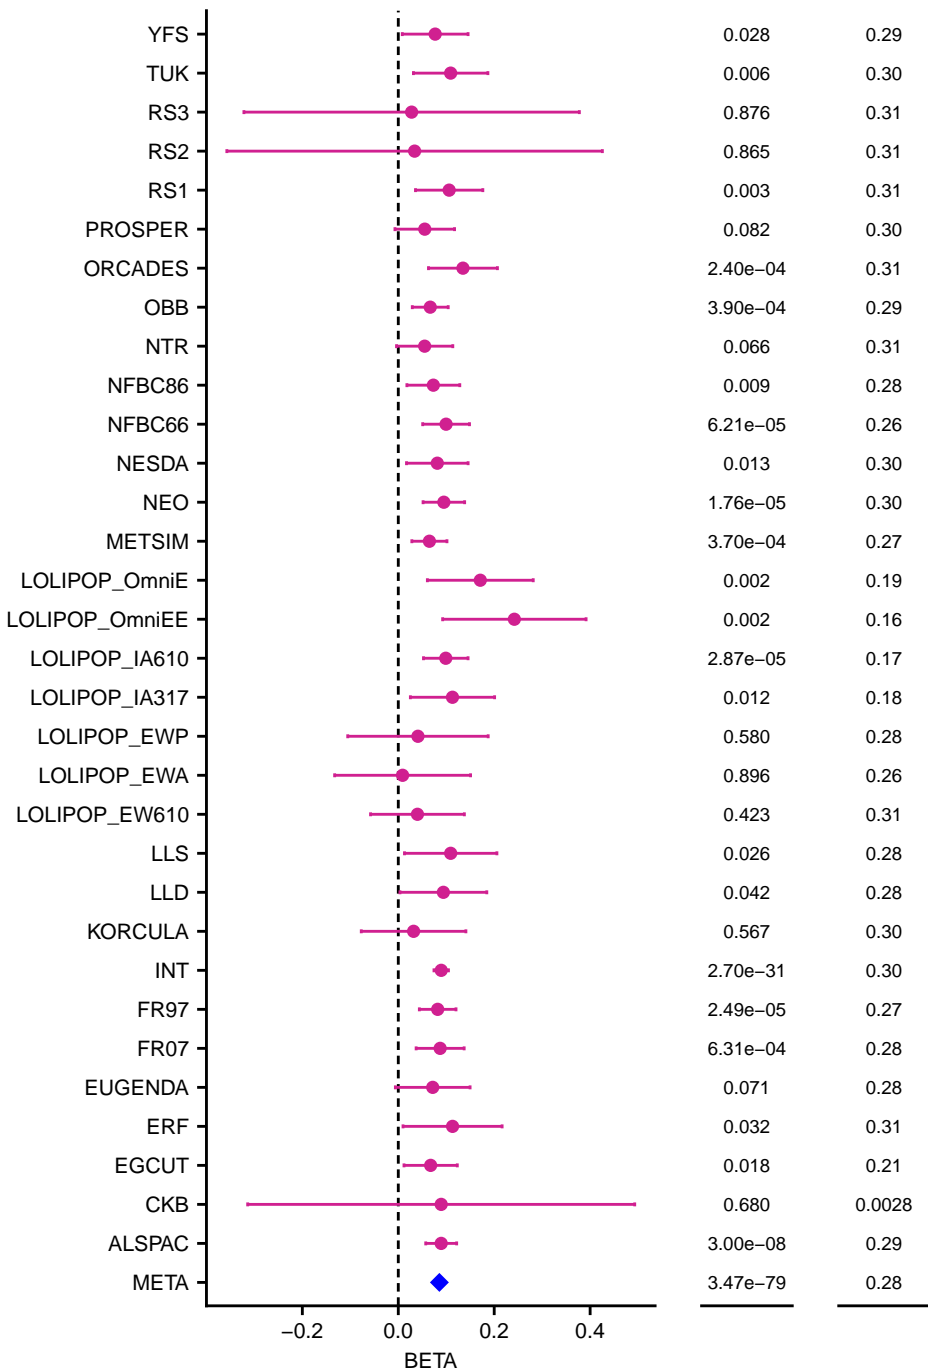

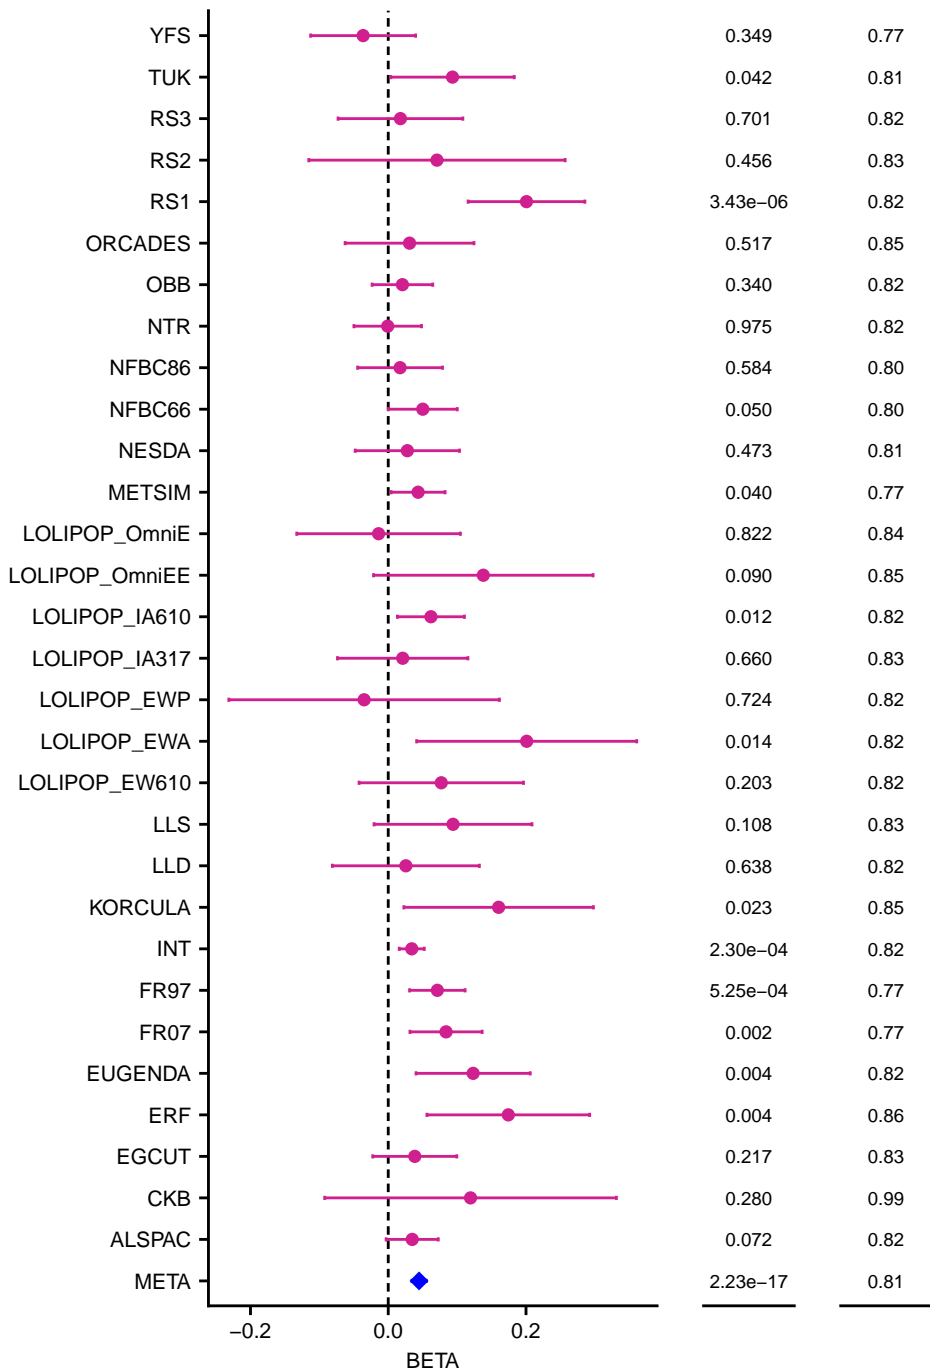

chr16:53802494:T S-VLDL-PL\_percent

P-value

EAF

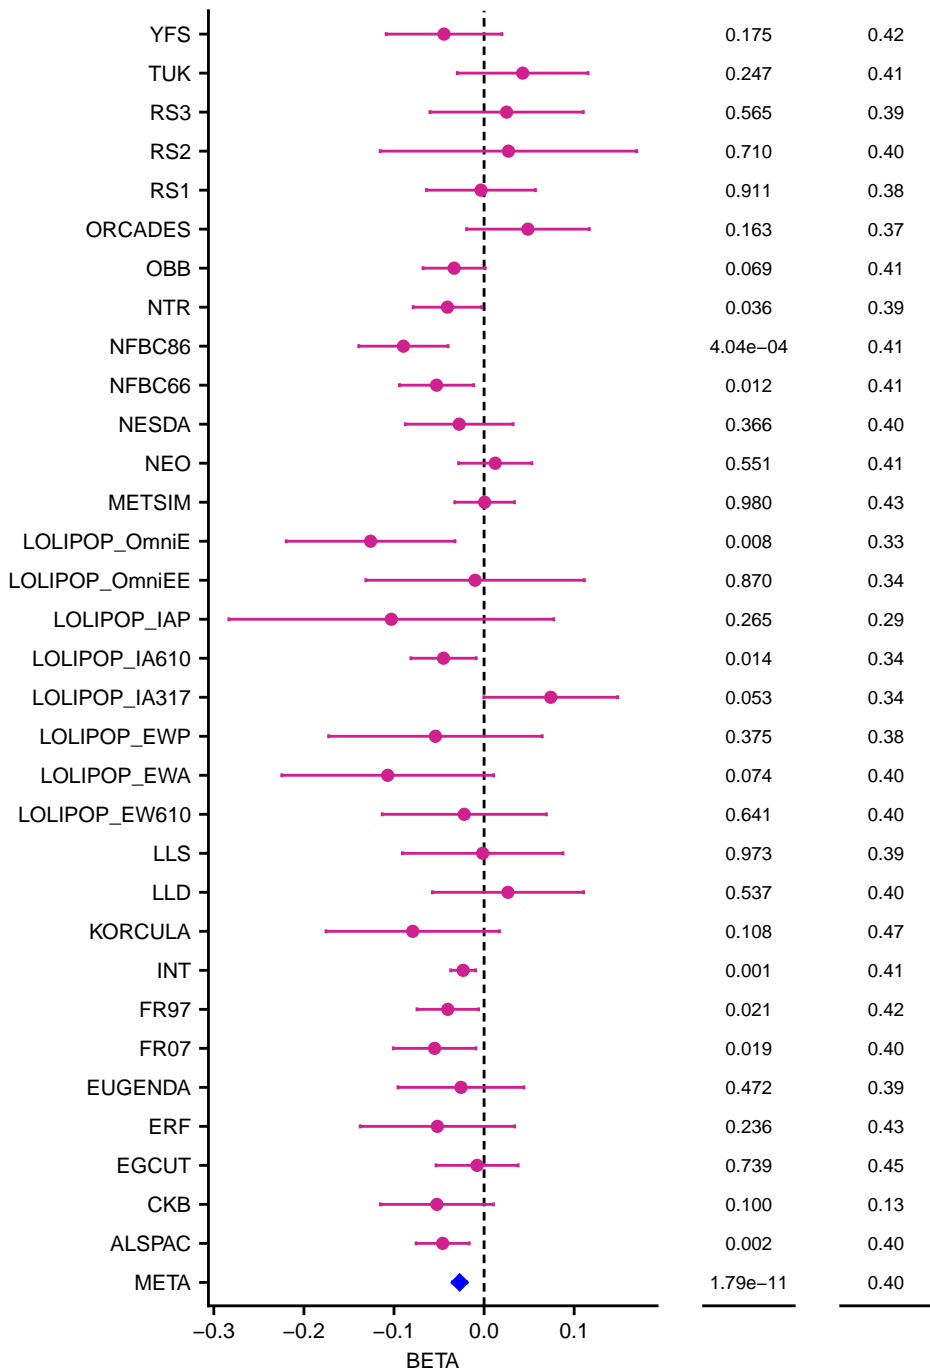

## chr16:56991363:T HDL-C

P-value

EAF

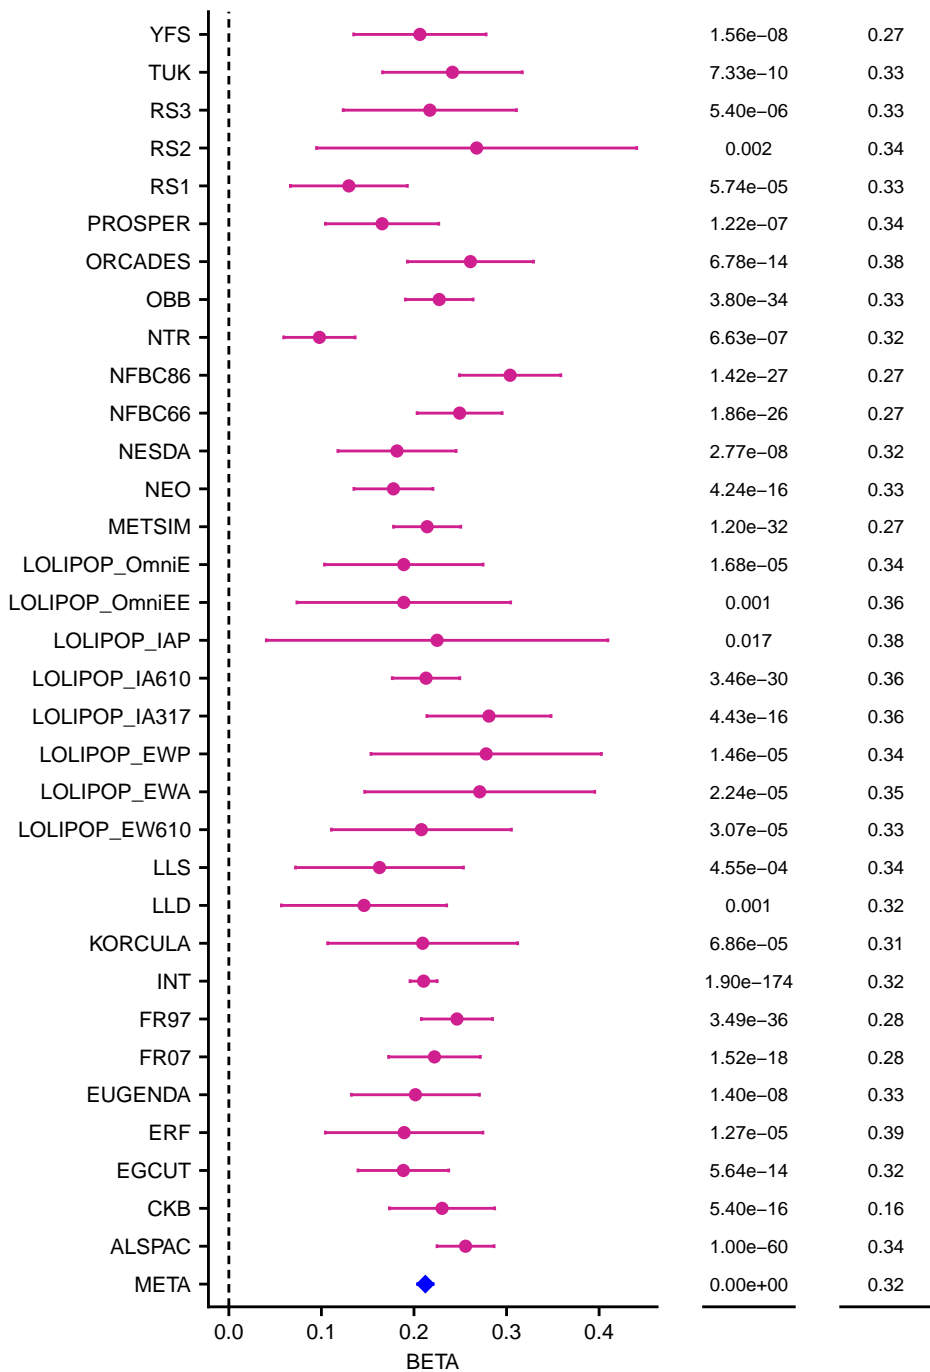

## chr16:71628046:T Tyr

P-value

EAF

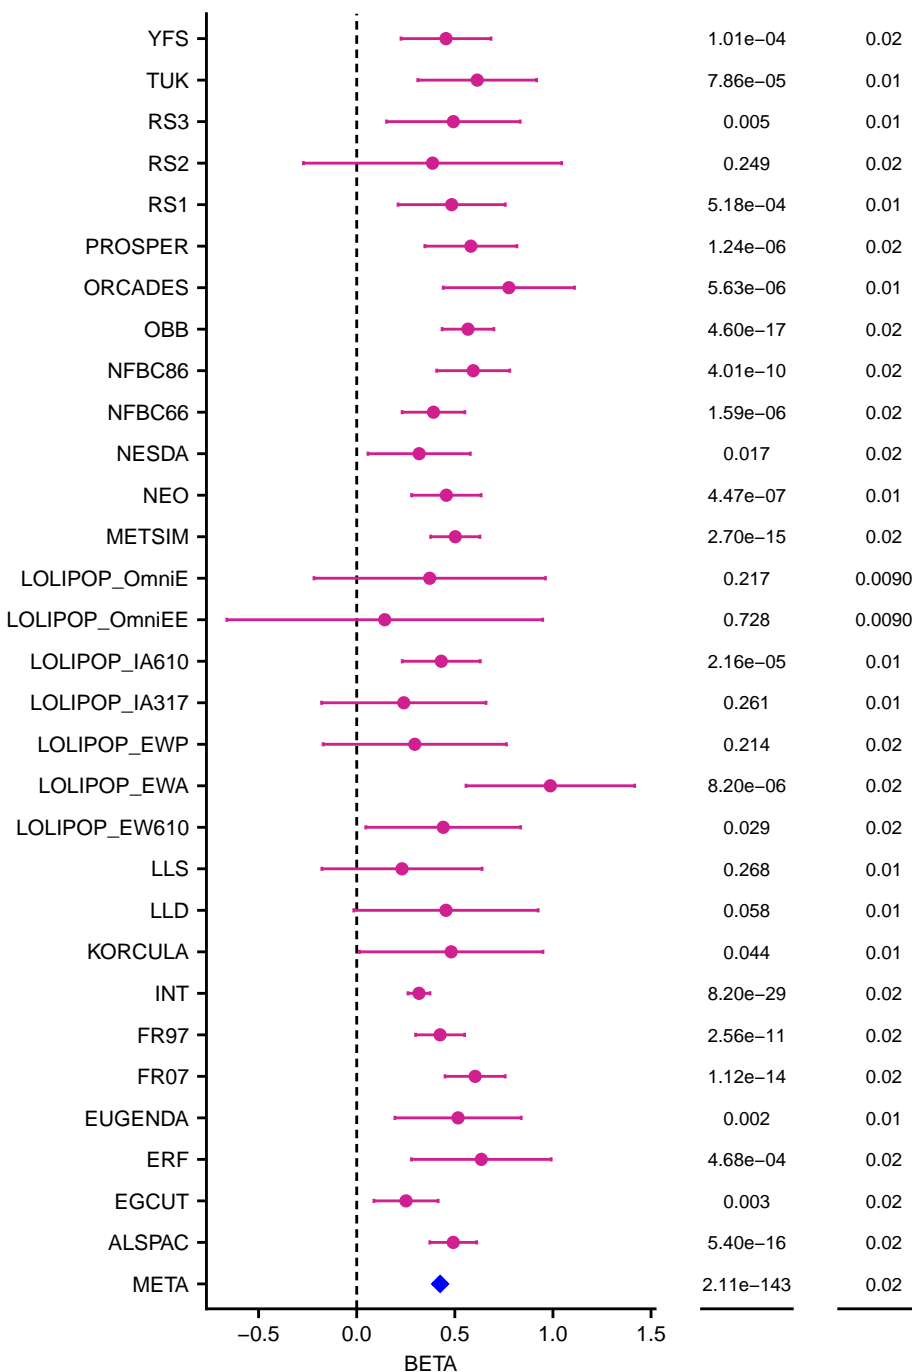



chr16:81126662:T Gly

P-value

EAF

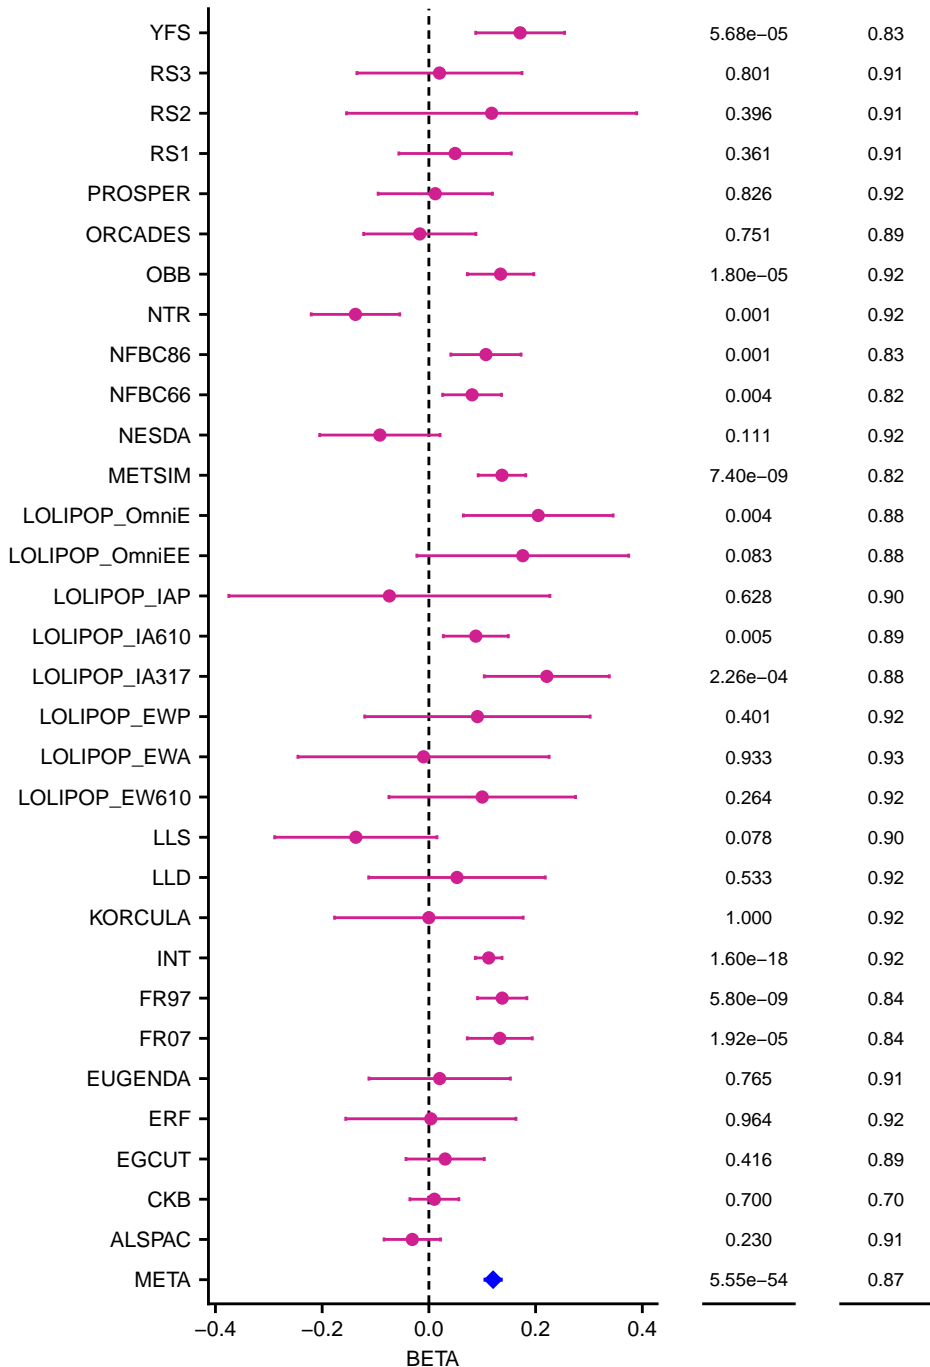

chr16:88031488:T Crea

P-value

EAF

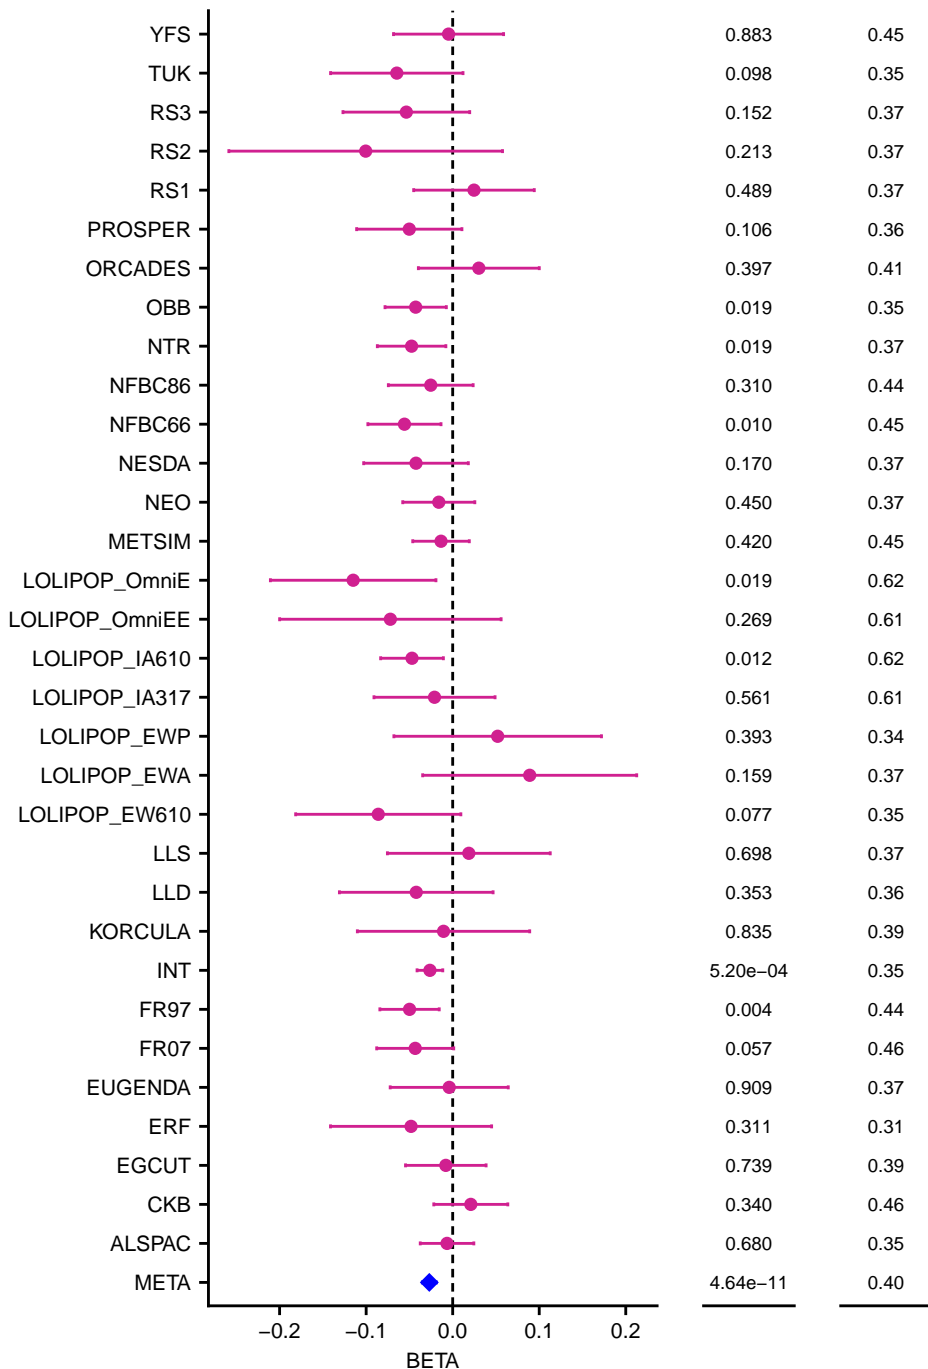

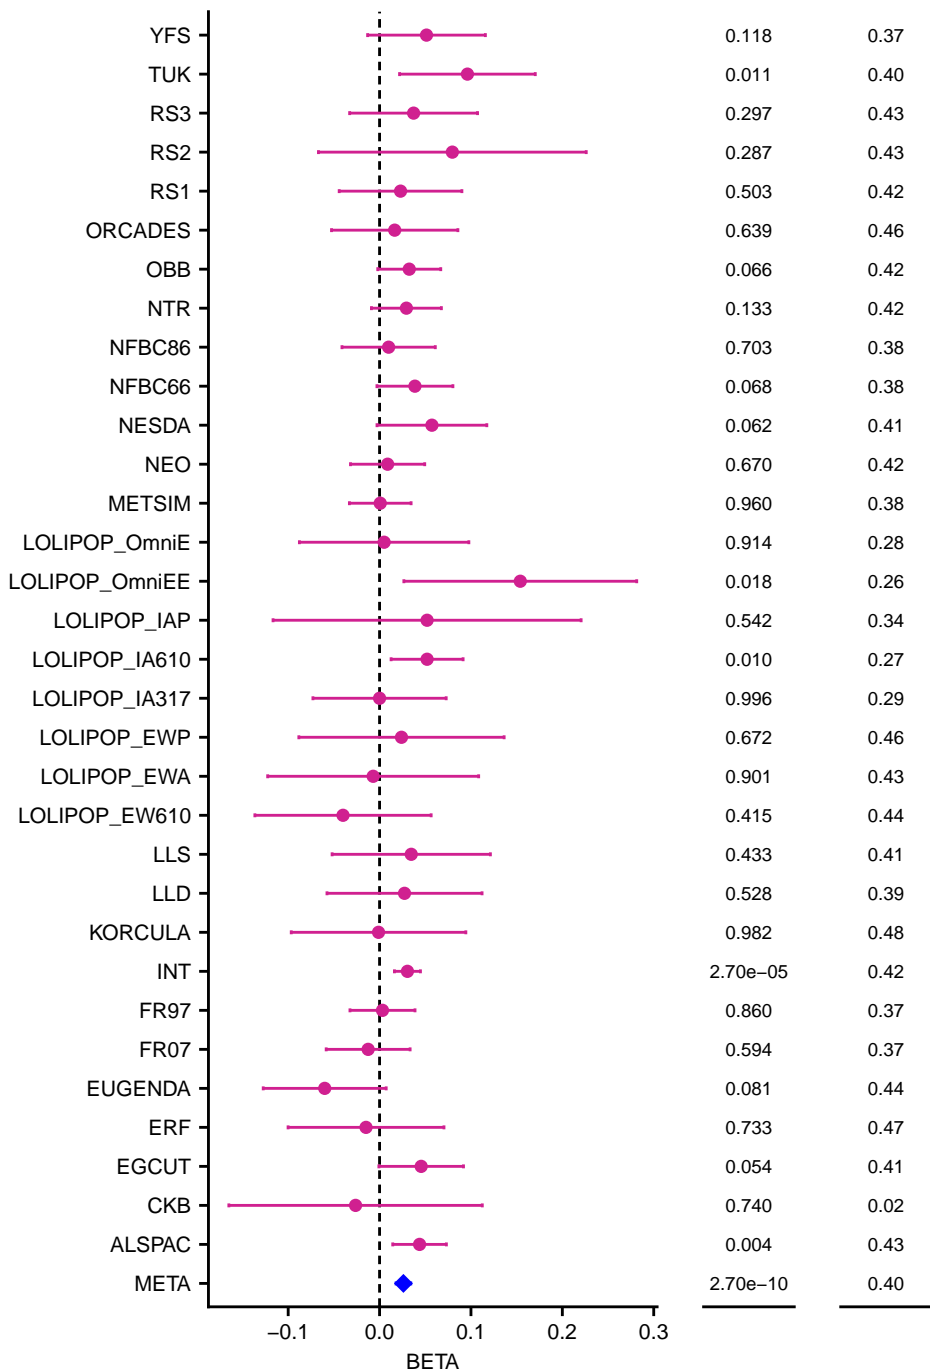

## chr17:1618262:T Alb

P-value

EAF

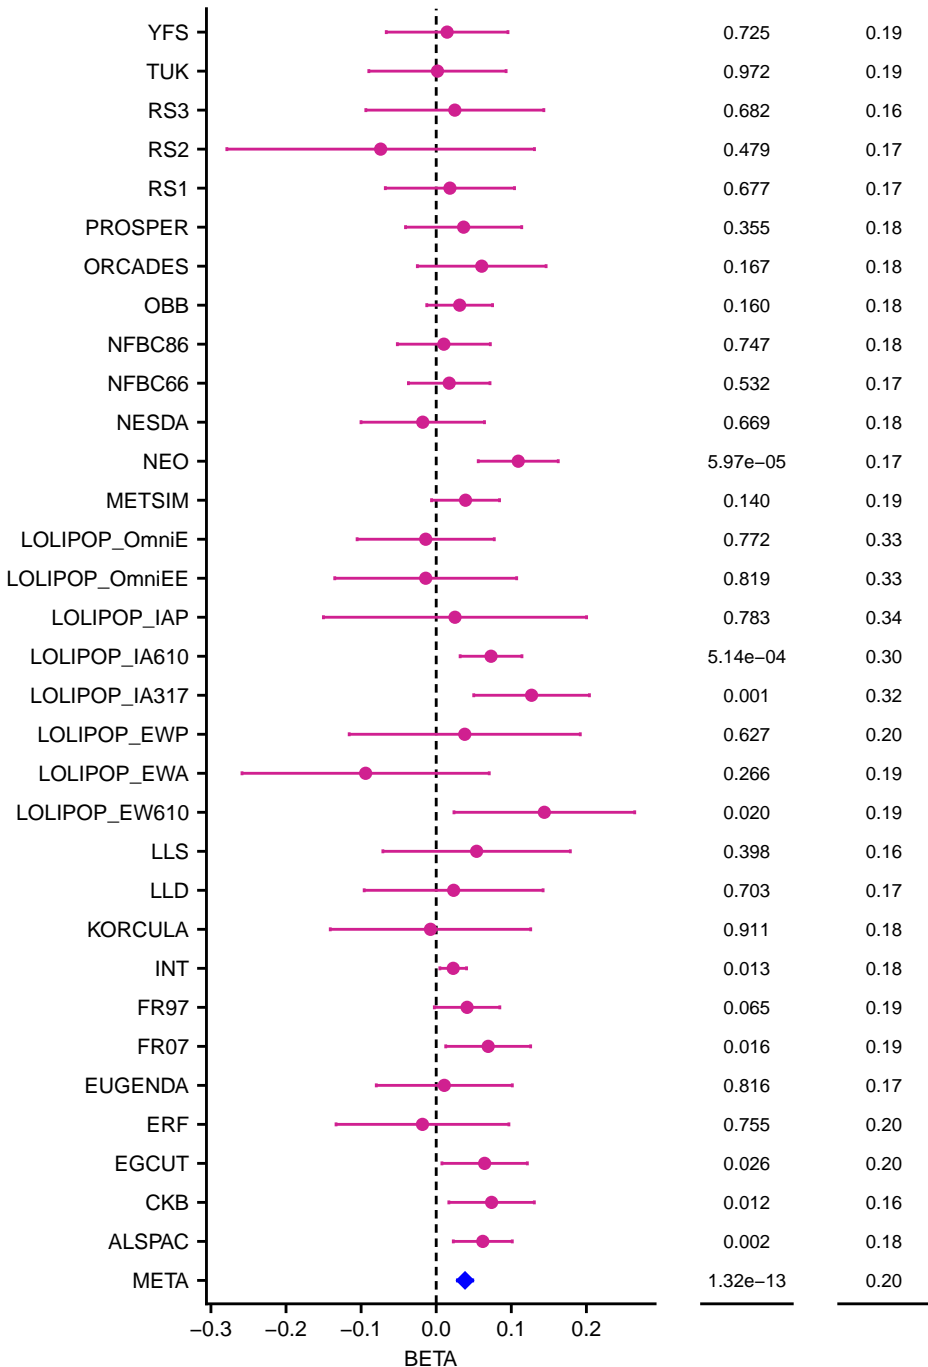

## chr17:4692640:T IDL-TG

P-value

EAF

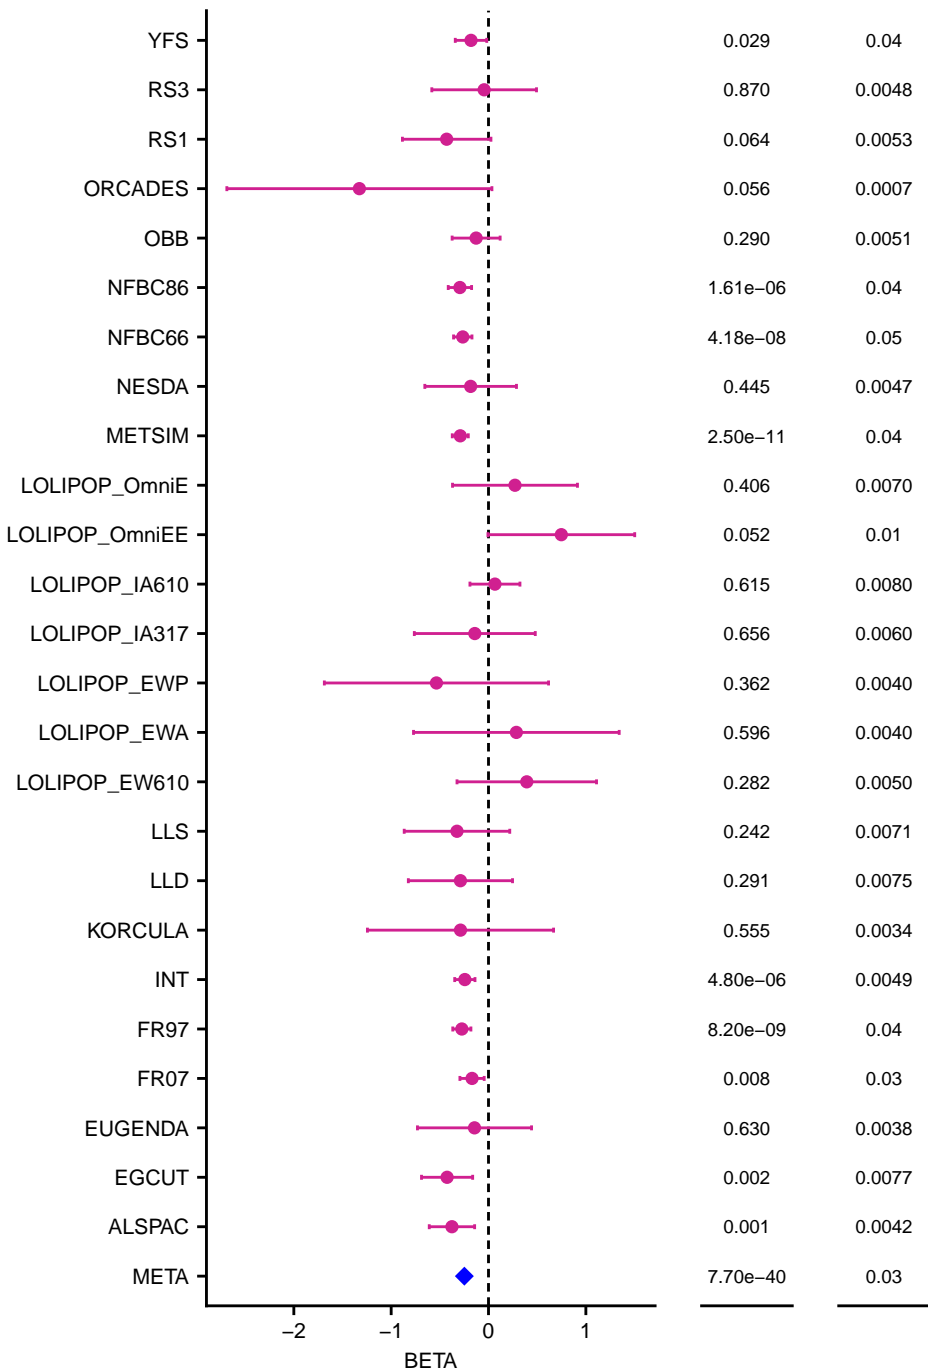

## chr17:6595398:A Cit

P-value

EAF

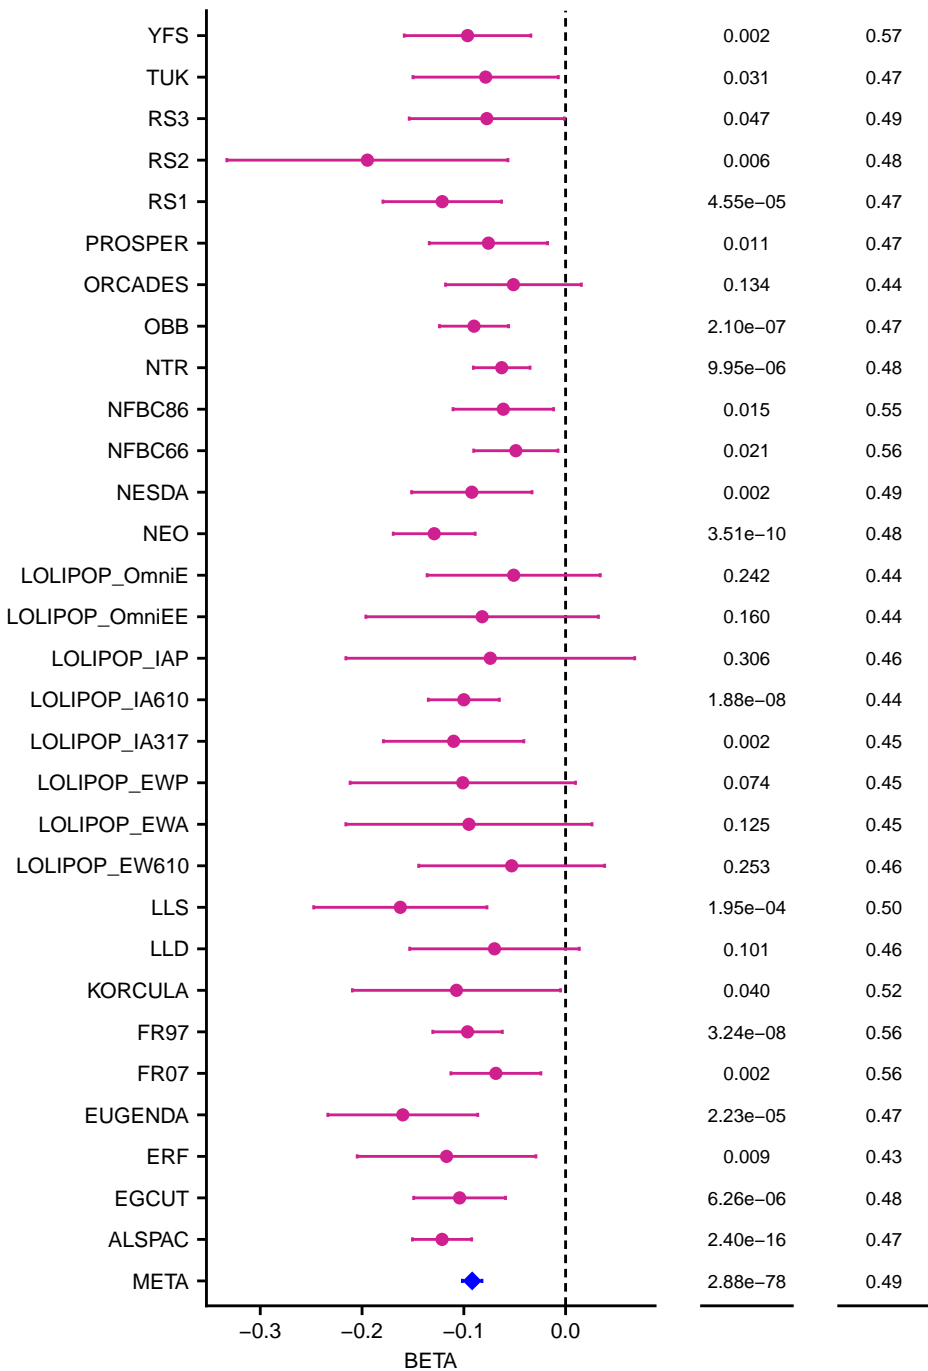

## chr17:16842991:A LDL-D

P-value

EAF

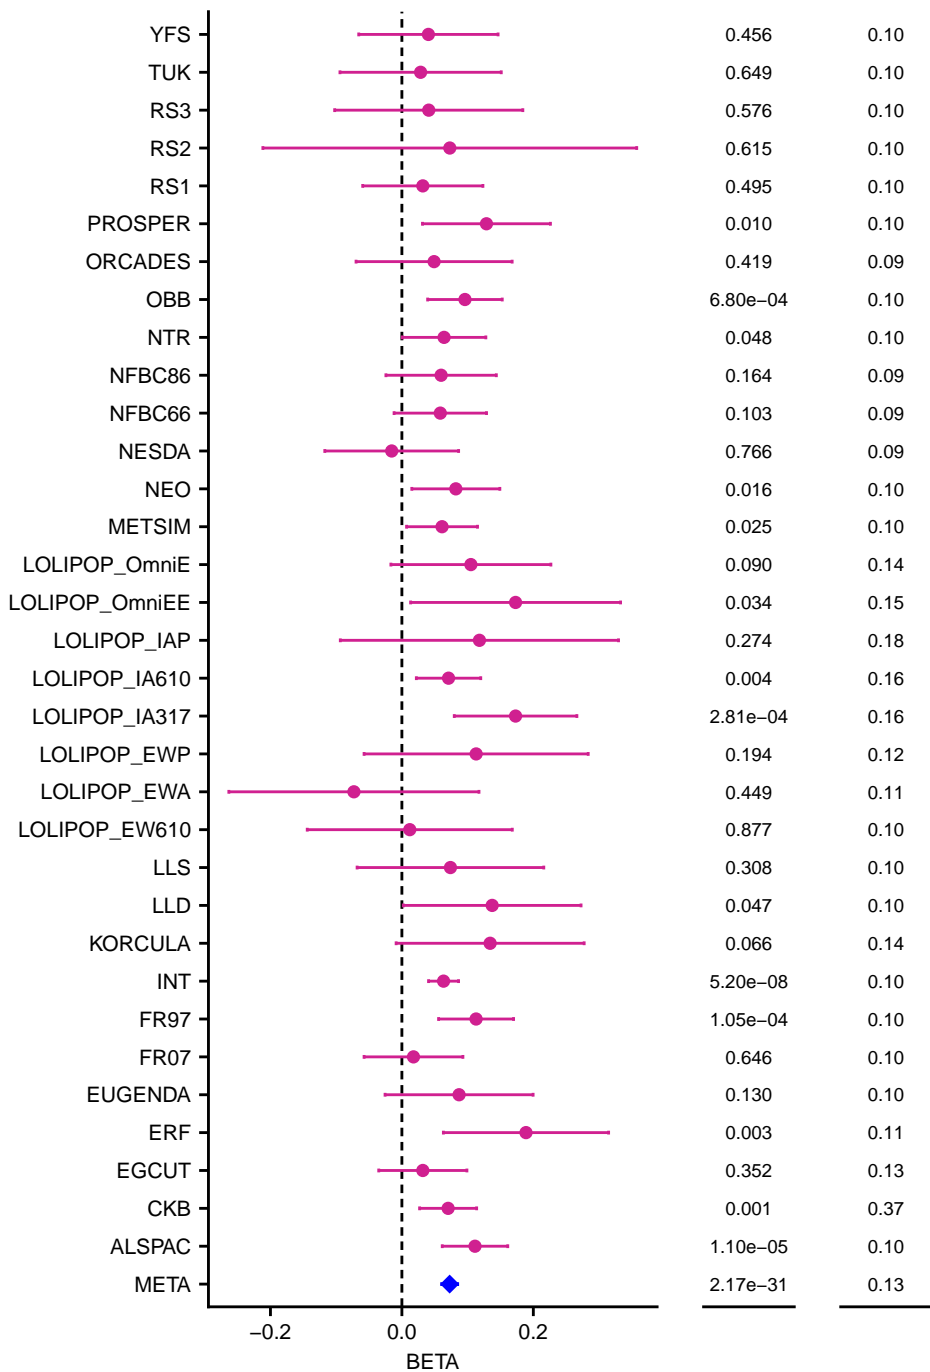

chr17:19474875:T Crea

P-value

EAF

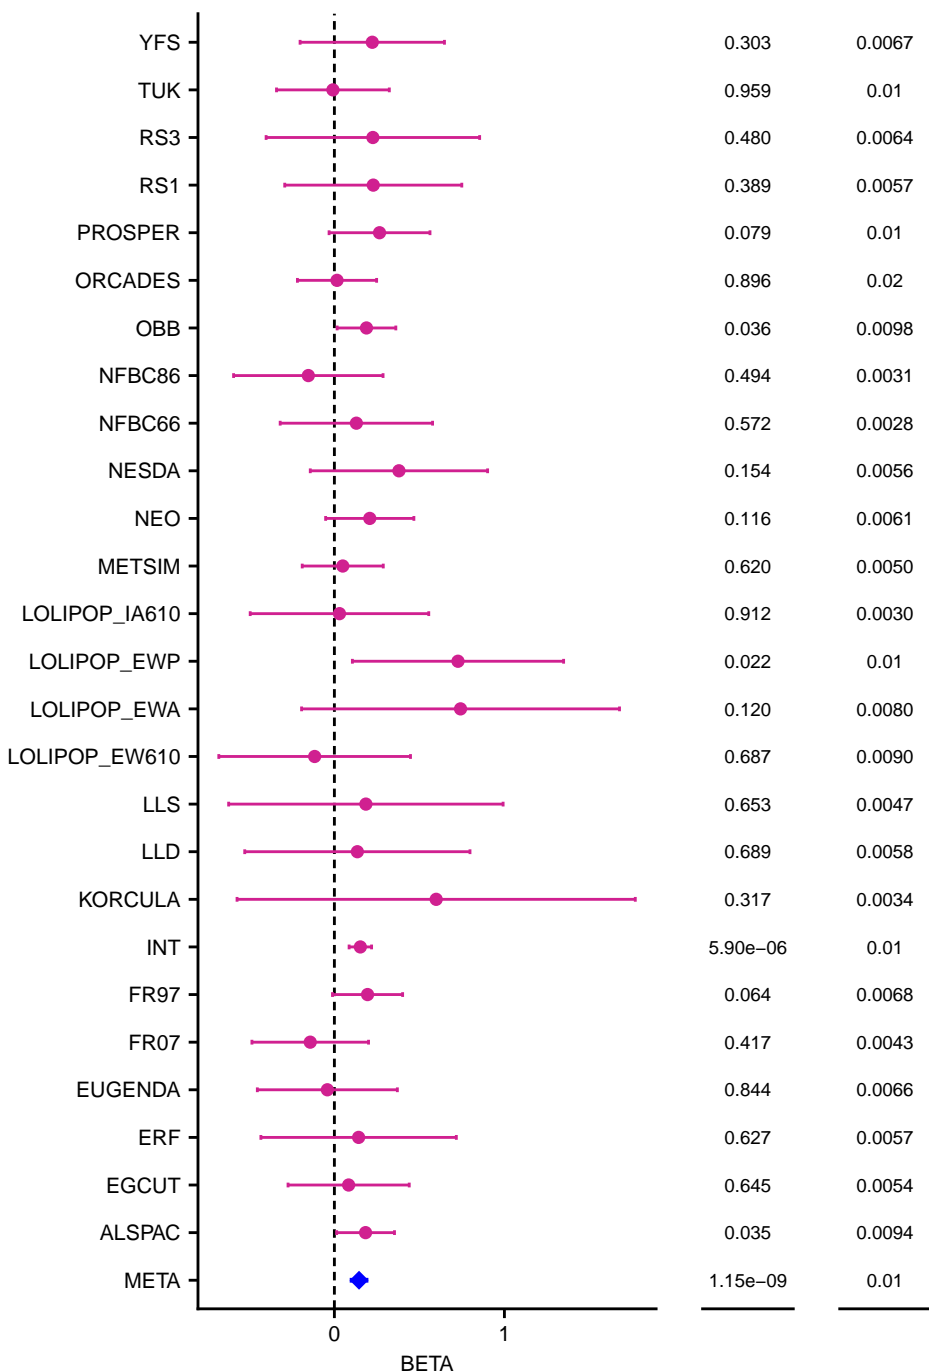



## chr17:26694861:A S-HDL-PL\_percent

P-value

EAF

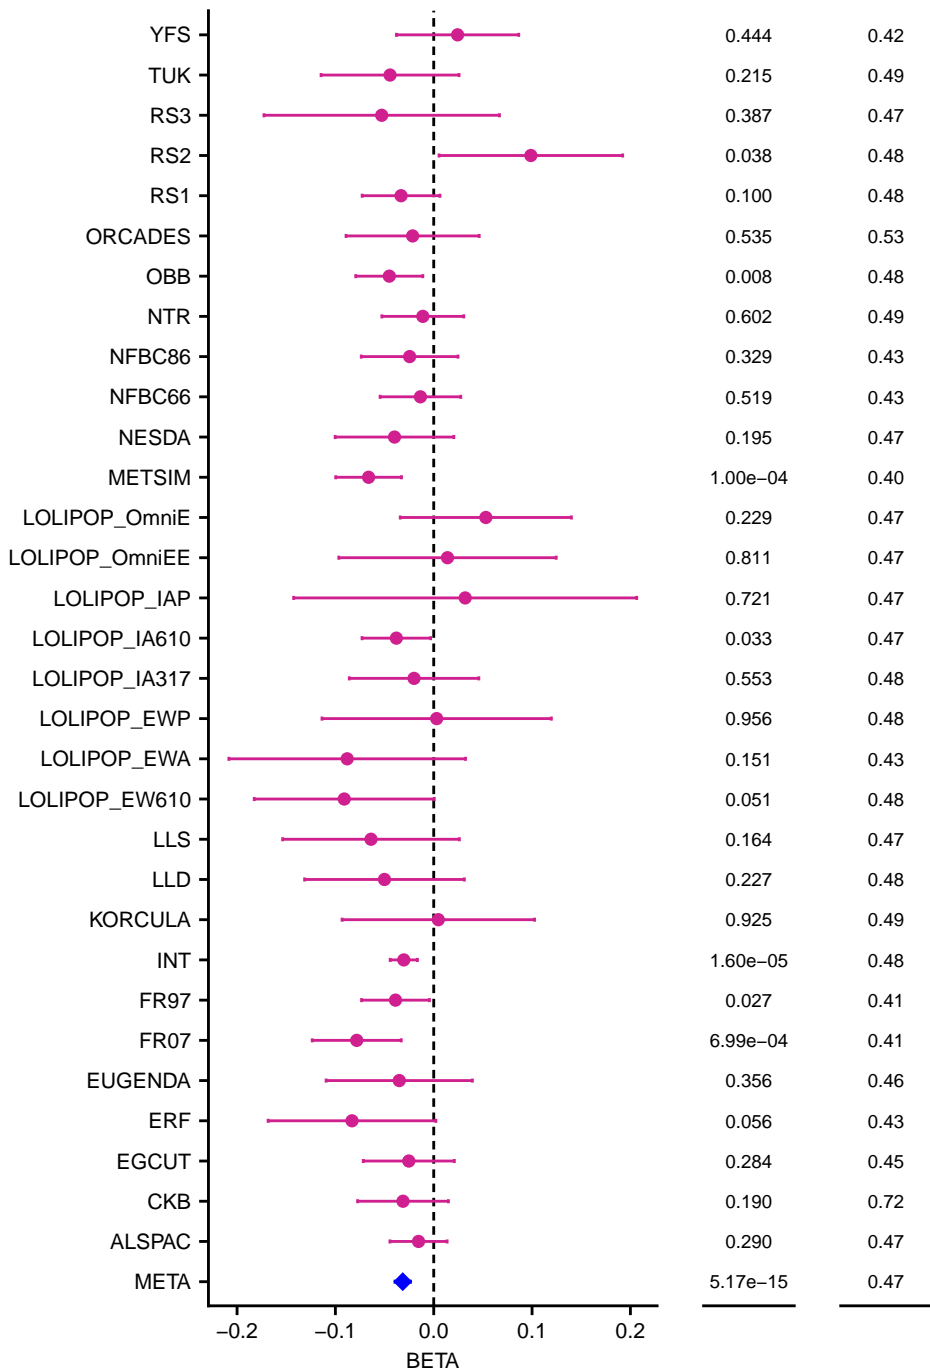

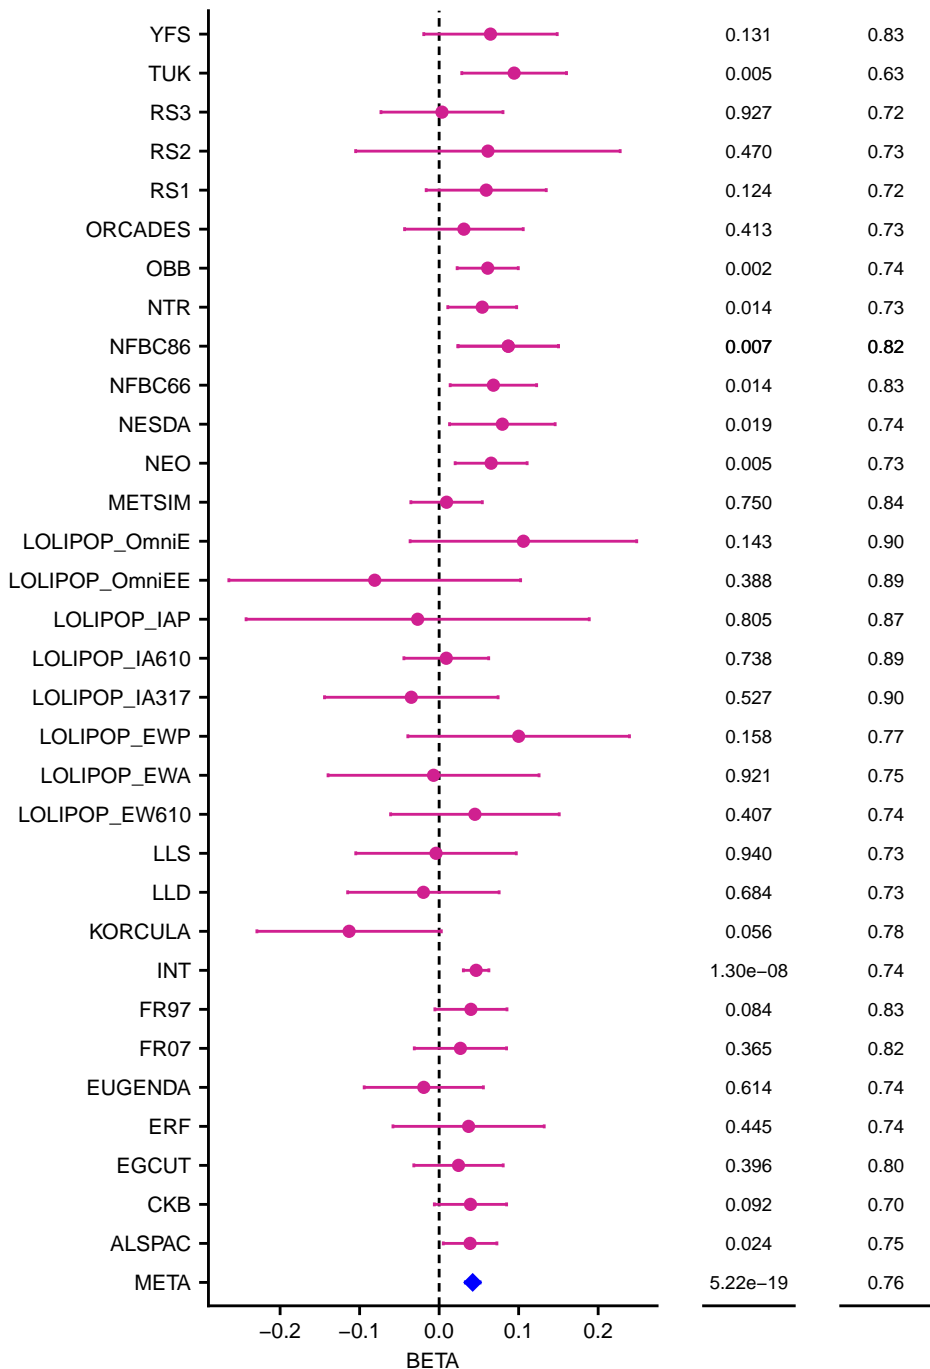

## chr17:41926126:T HDL-D

P-value

EAF

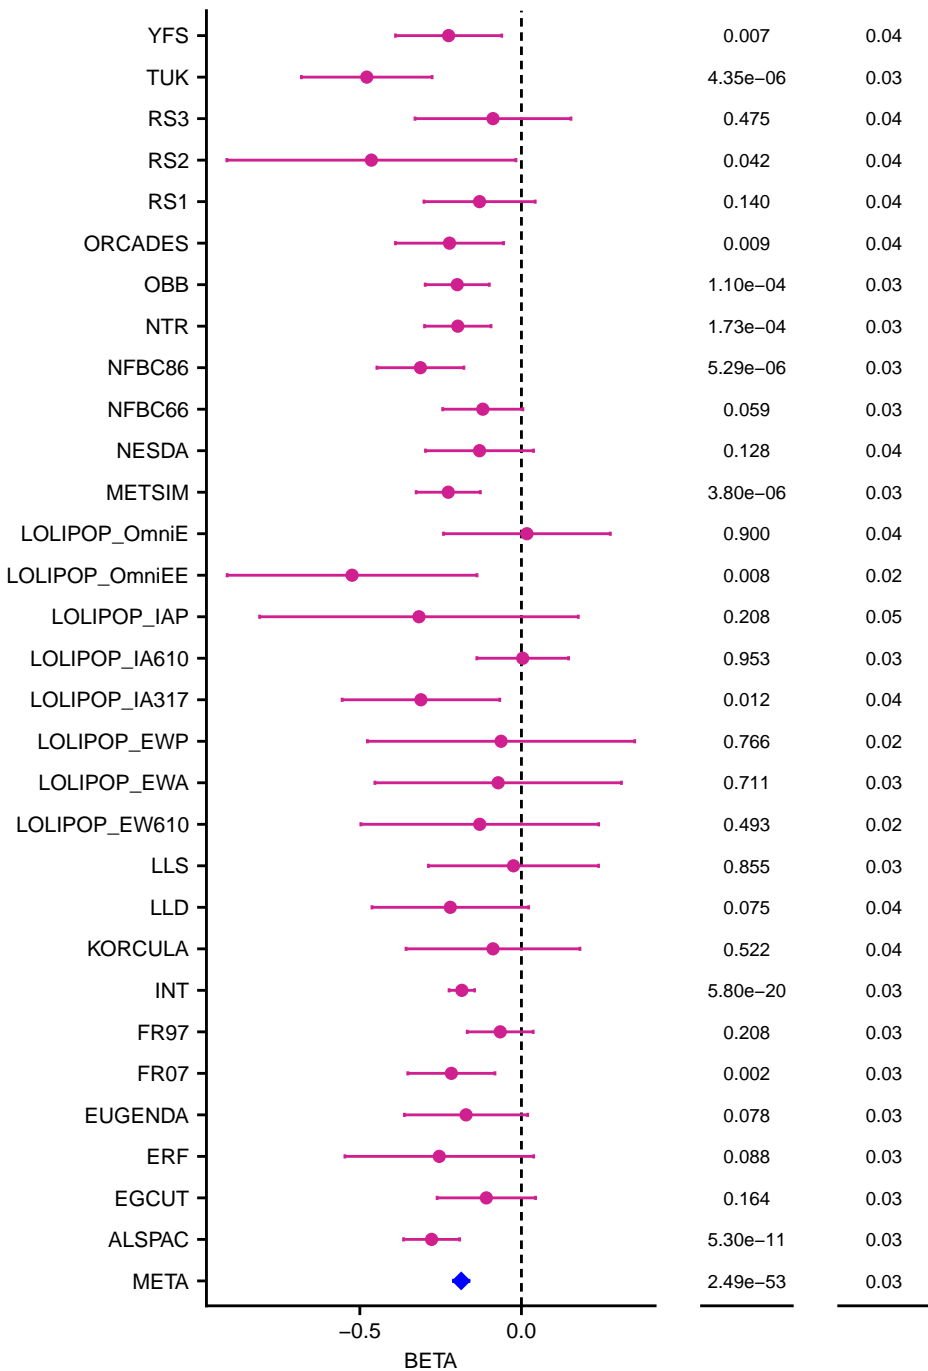

## chr17:45763073:A L-LDL-FC

P-value

EAF

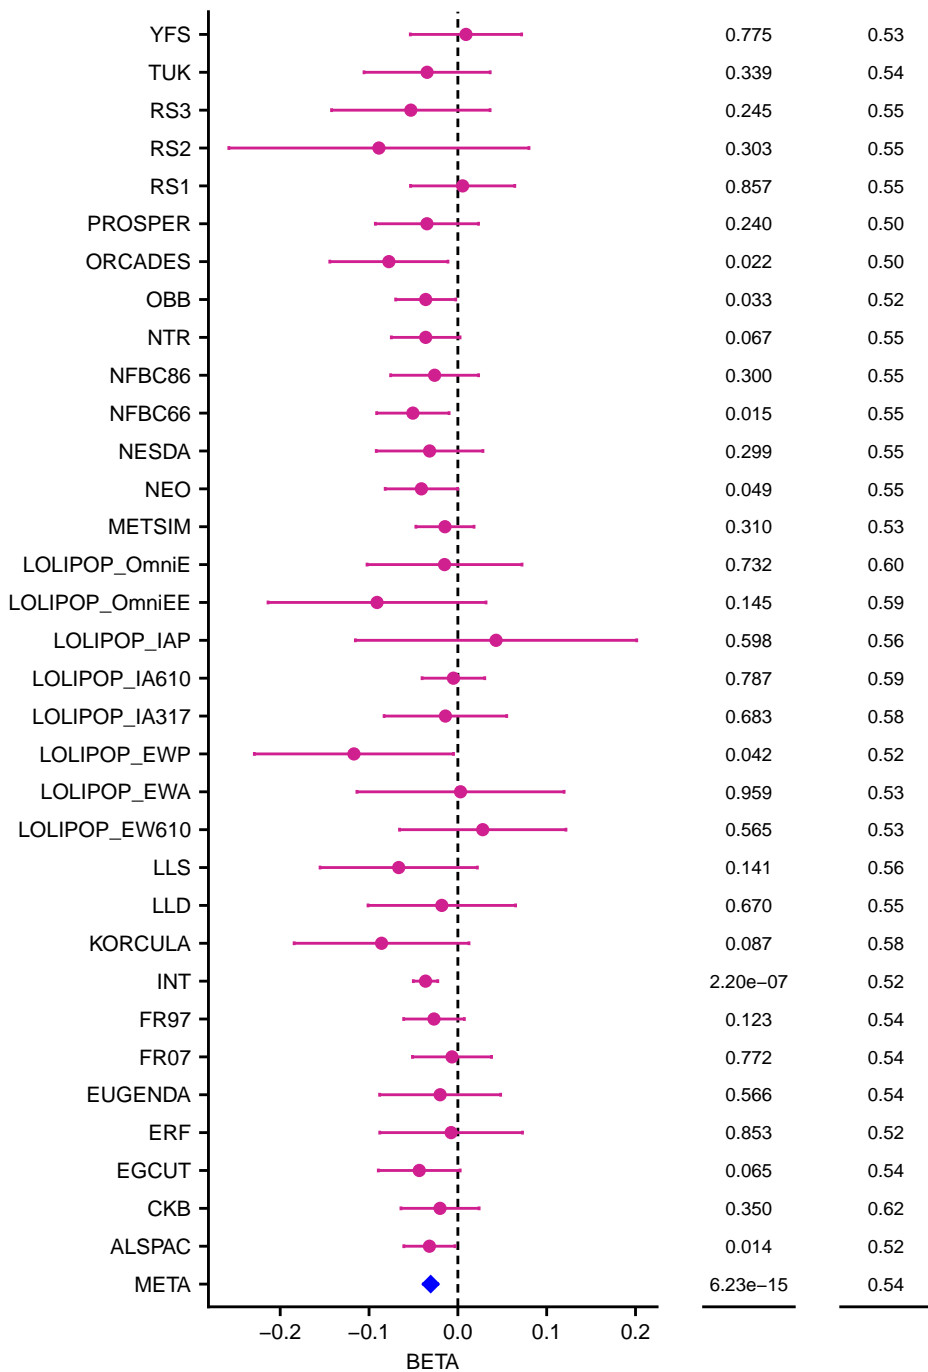

chr17:49274511:A S-LDL-FC\_percent

P-value

EAF

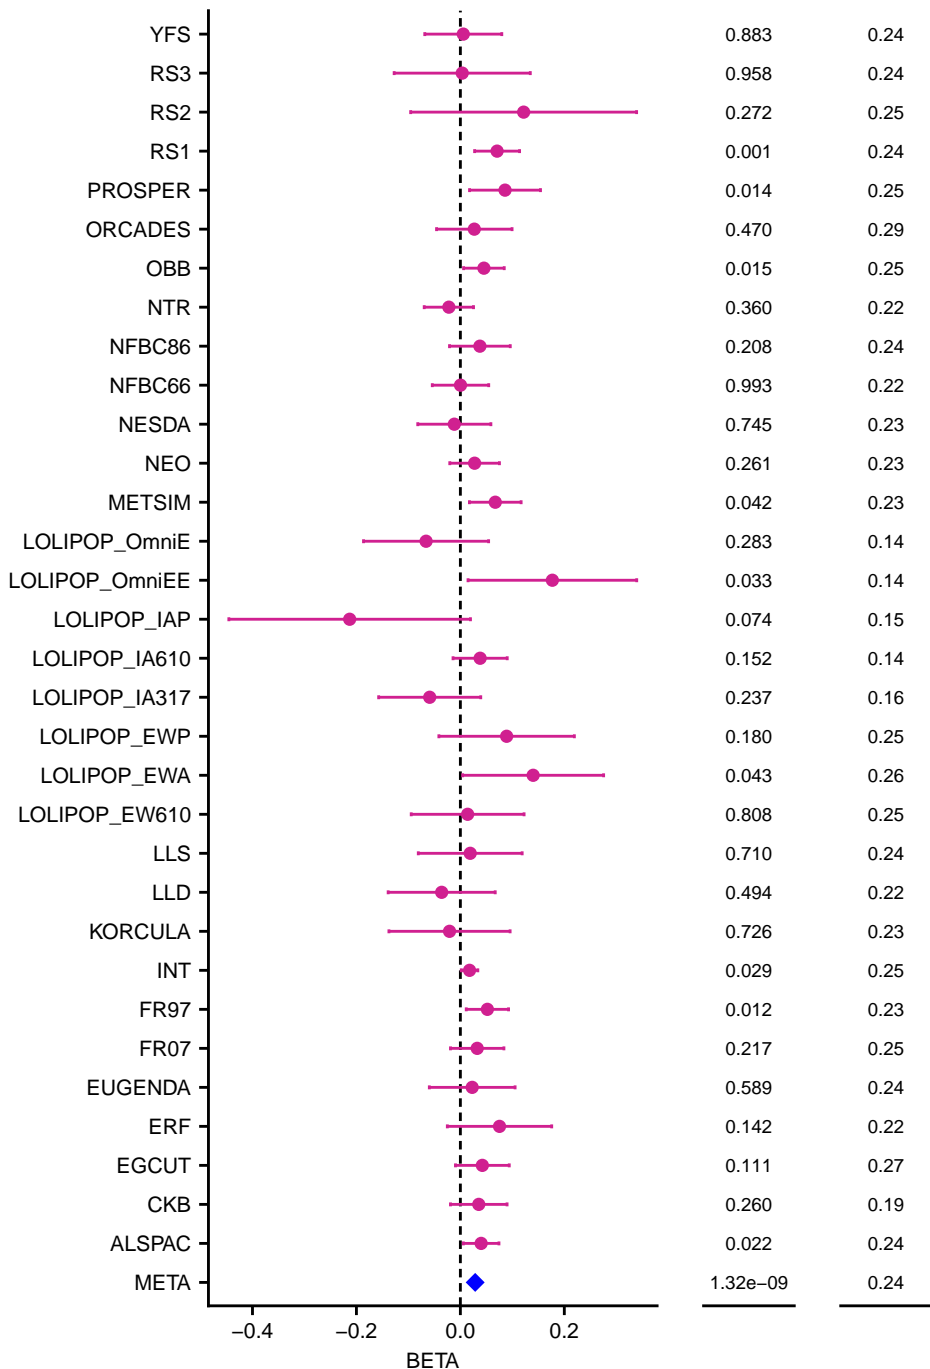

## chr17:59456589:T Crea

P-value

EAF

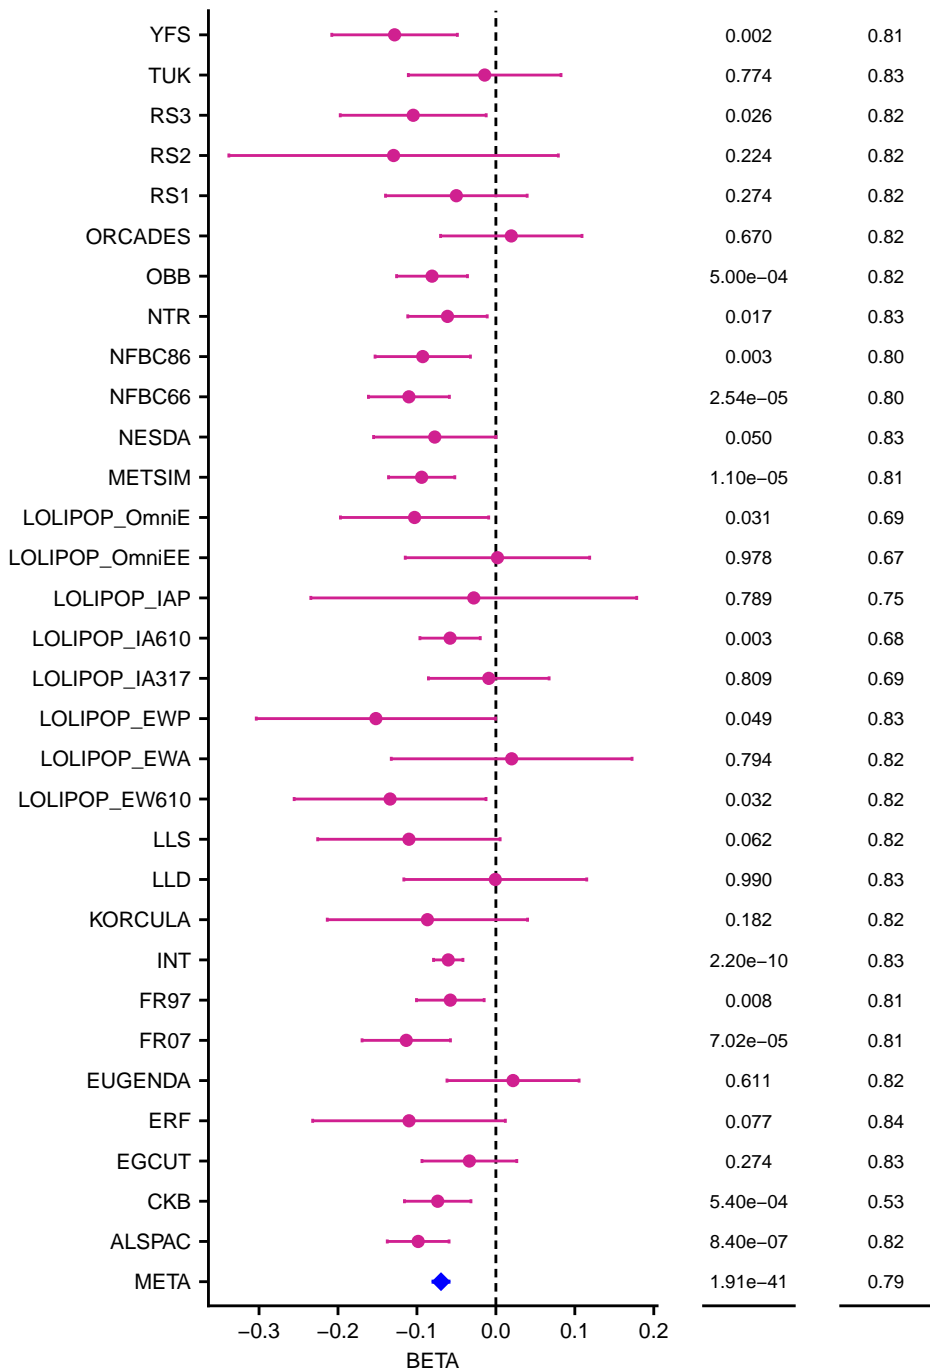

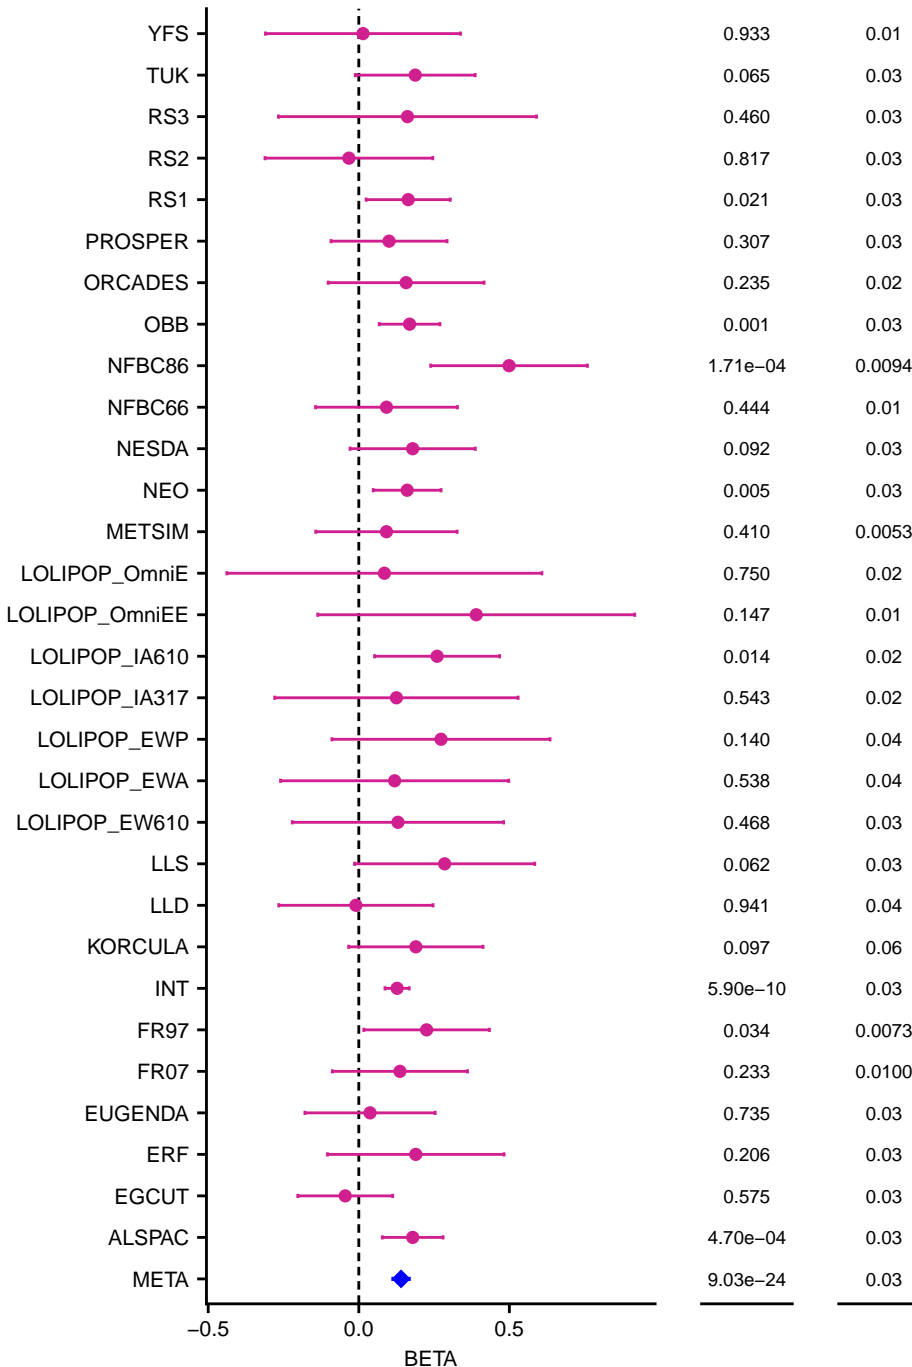

## chr17:67081278:A L-LDL-FC

P-value

EAF

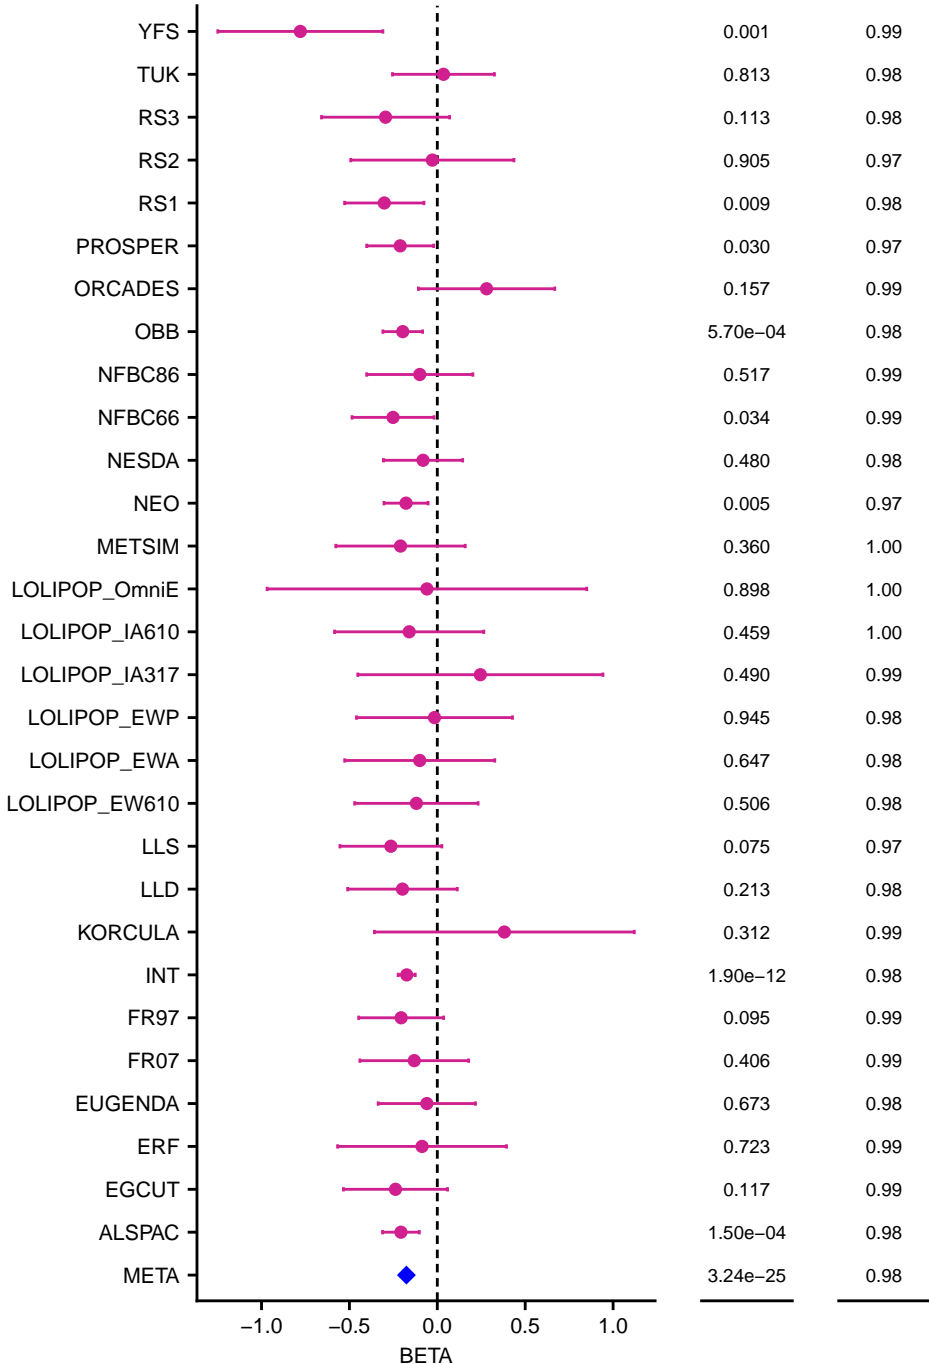



## chr17:73796002:T ApoBbyApoA1

P-value

EAF

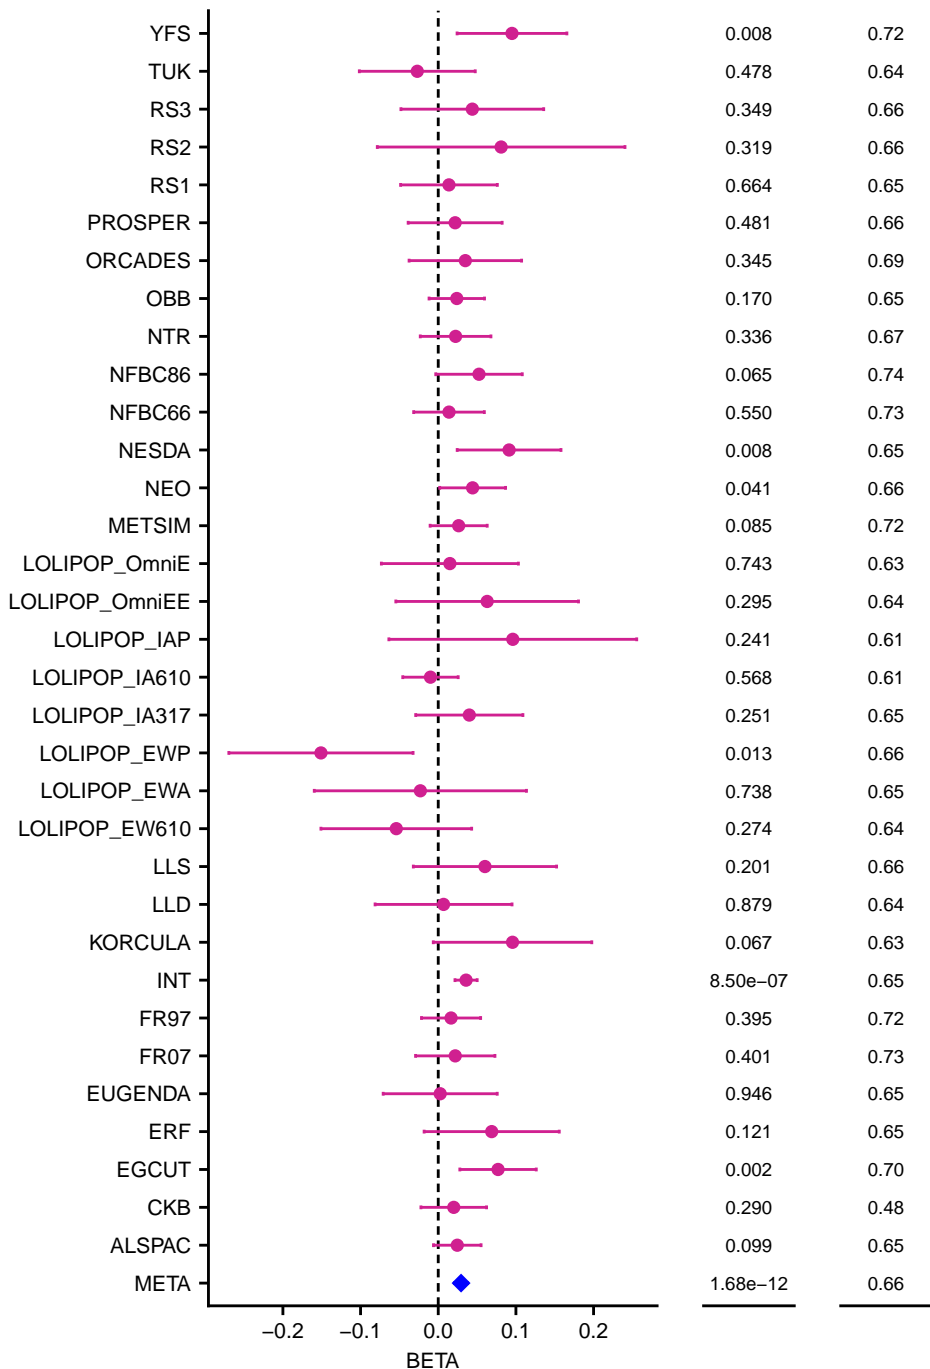

chr17:76392144:A S-VLDL-CE\_percent

P-value

EAF

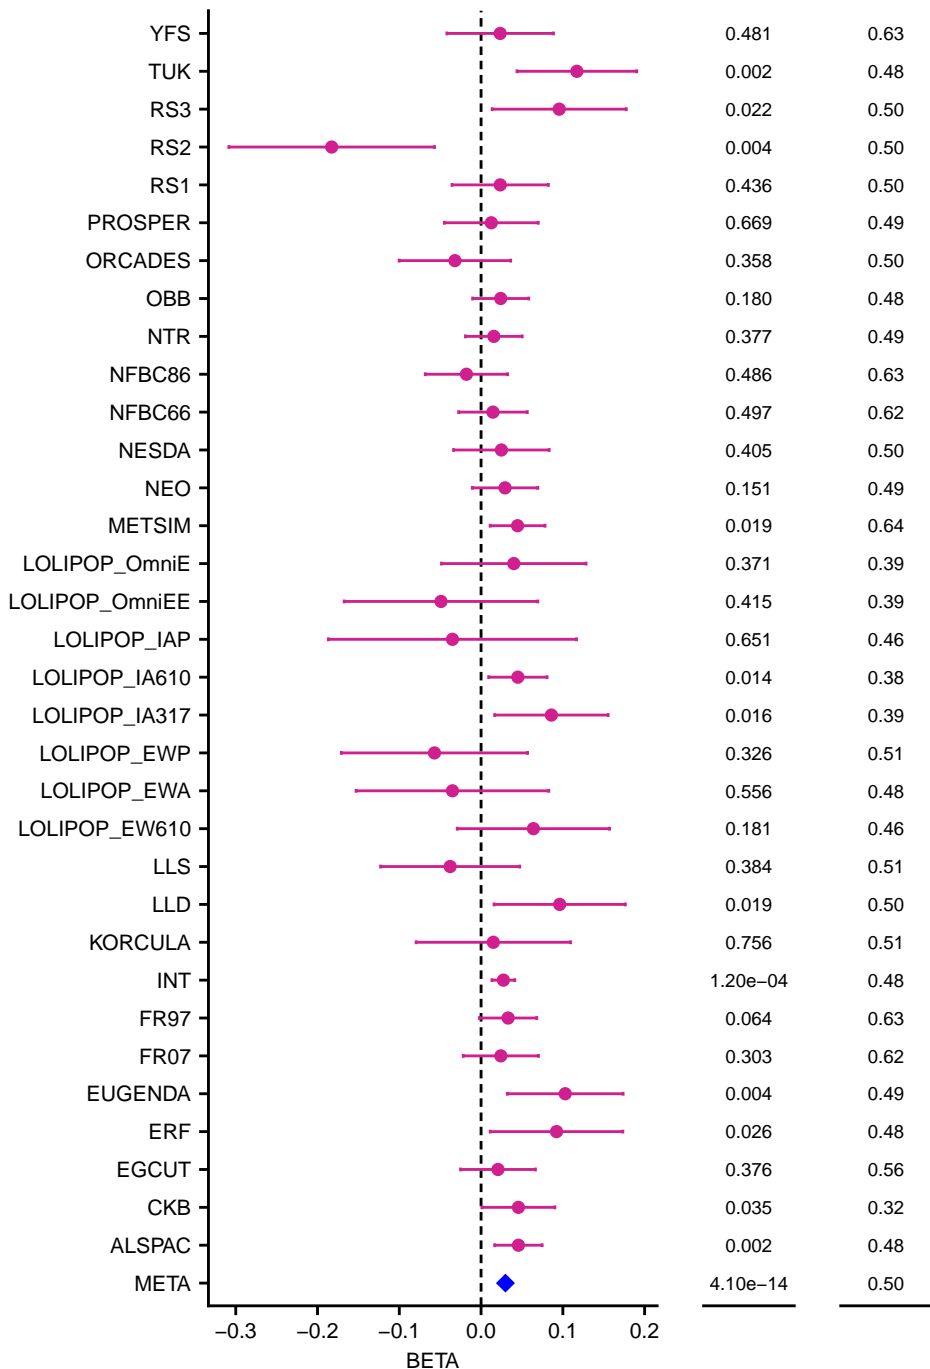

chr18:29769910:A S-VLDL-TG

P-value

EAF

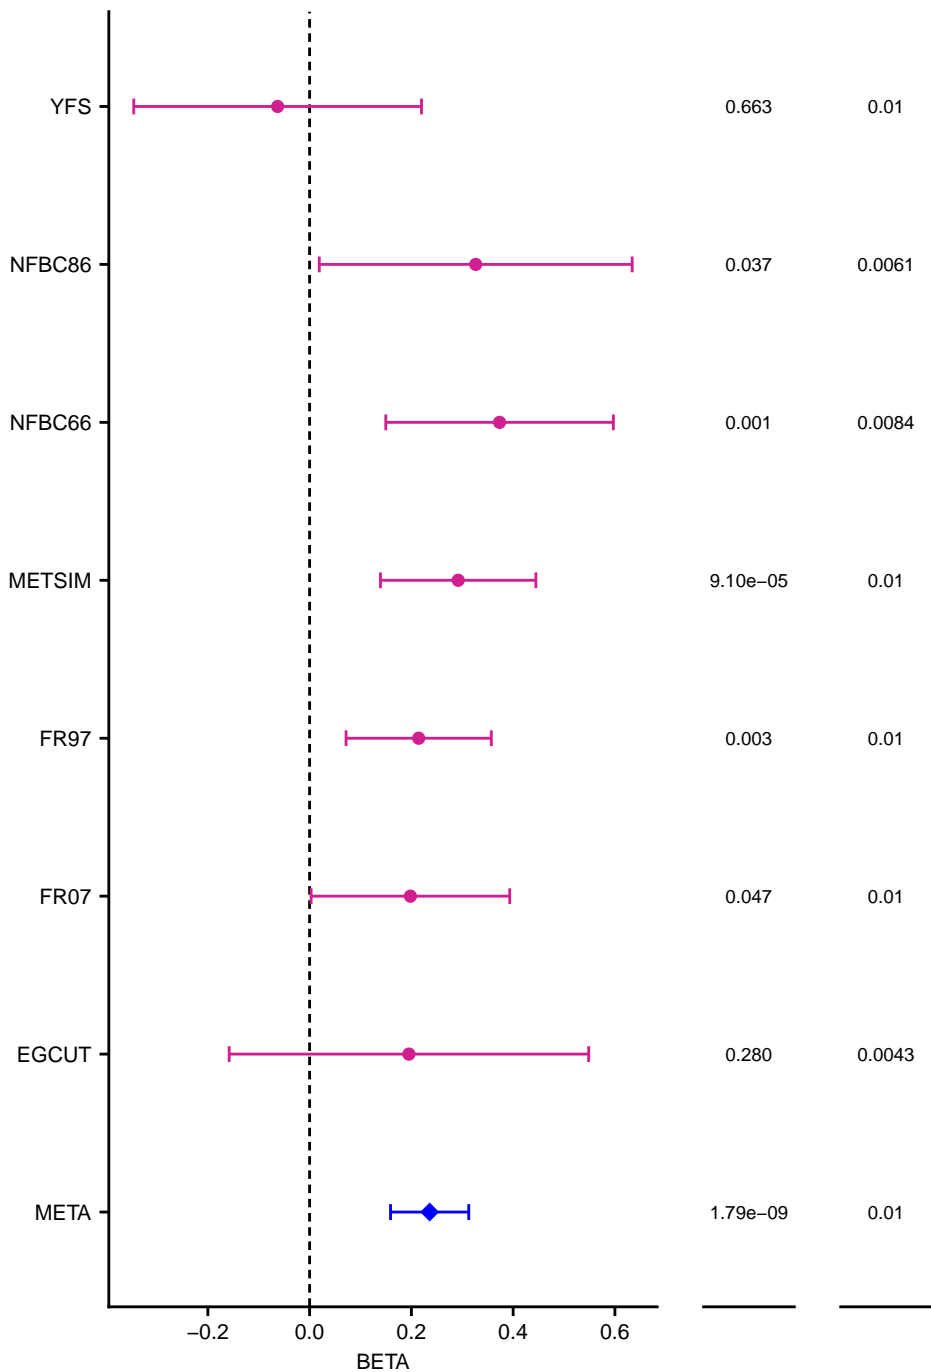

## chr18:47181668:A M-HDL-PL

P-value

EAF

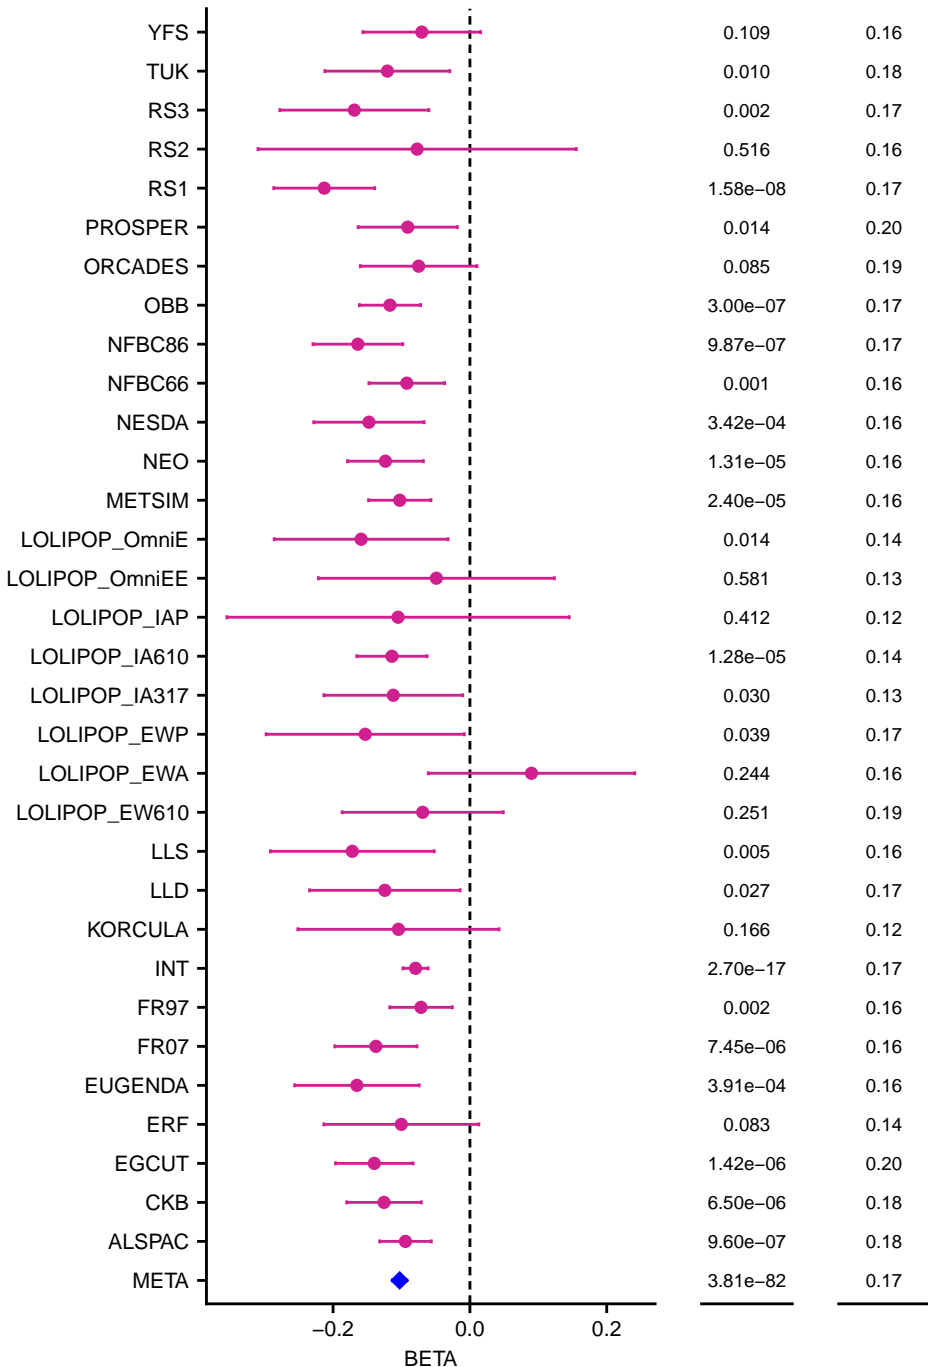

## chr18:57854694:T L-HDL-FC

P-value

EAF

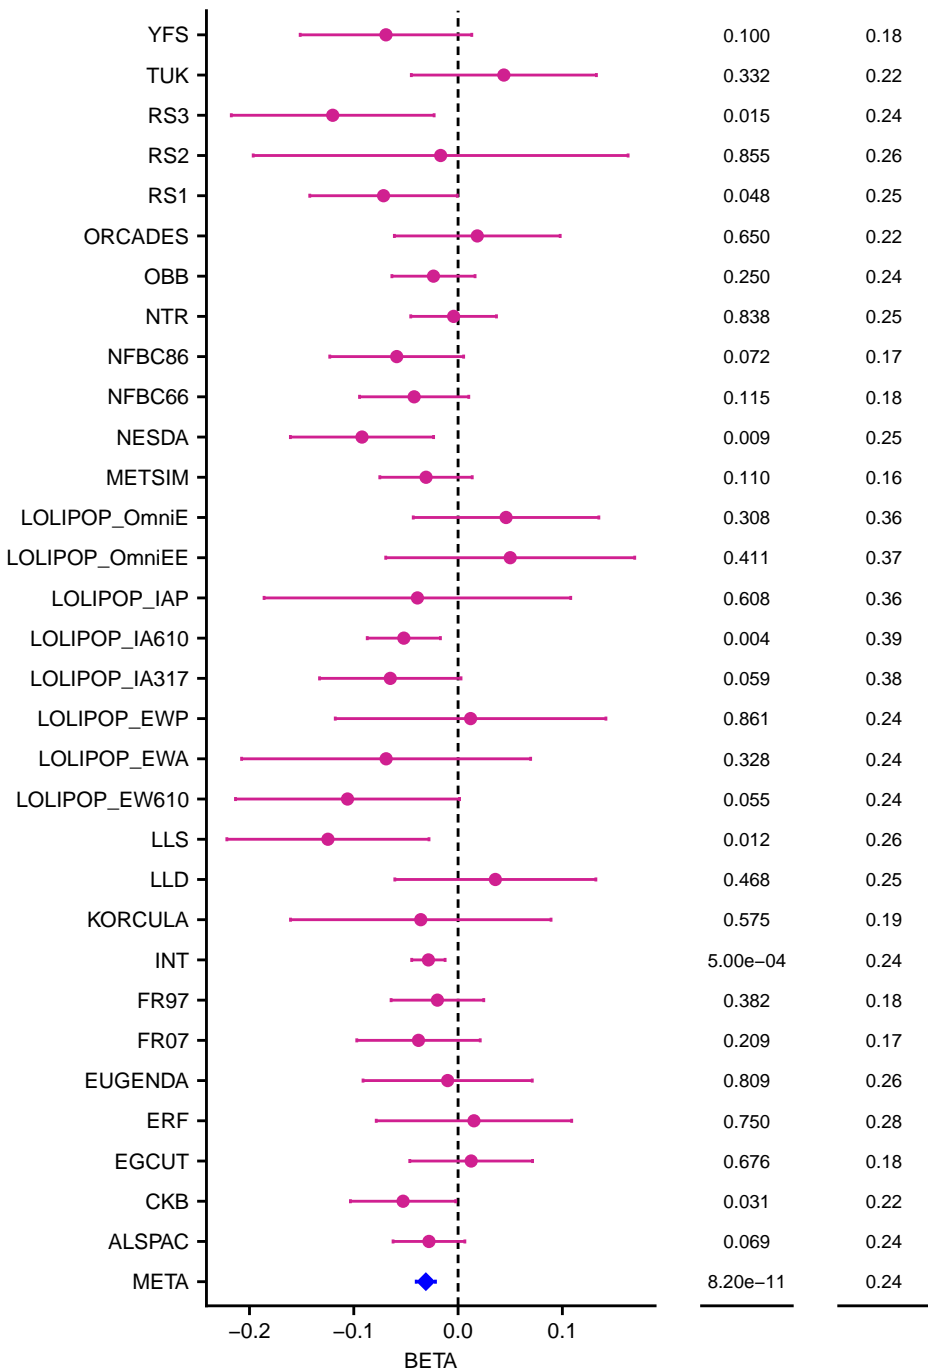

## chr18:77156537:C Crea

P-value

EAF

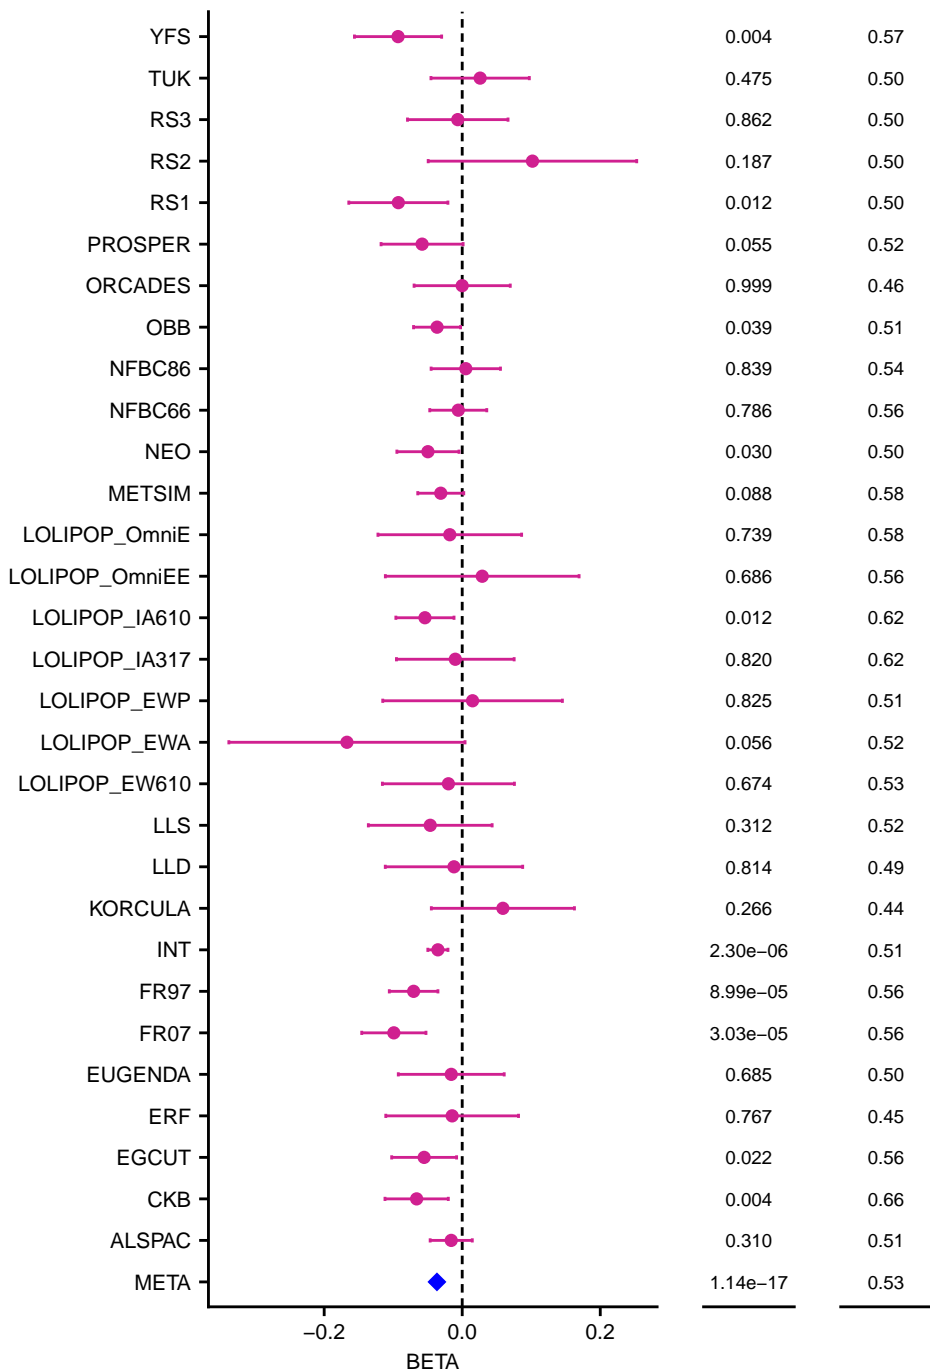

chr19:1231179:A L-VLDL-C\_percent

P-value

EAF

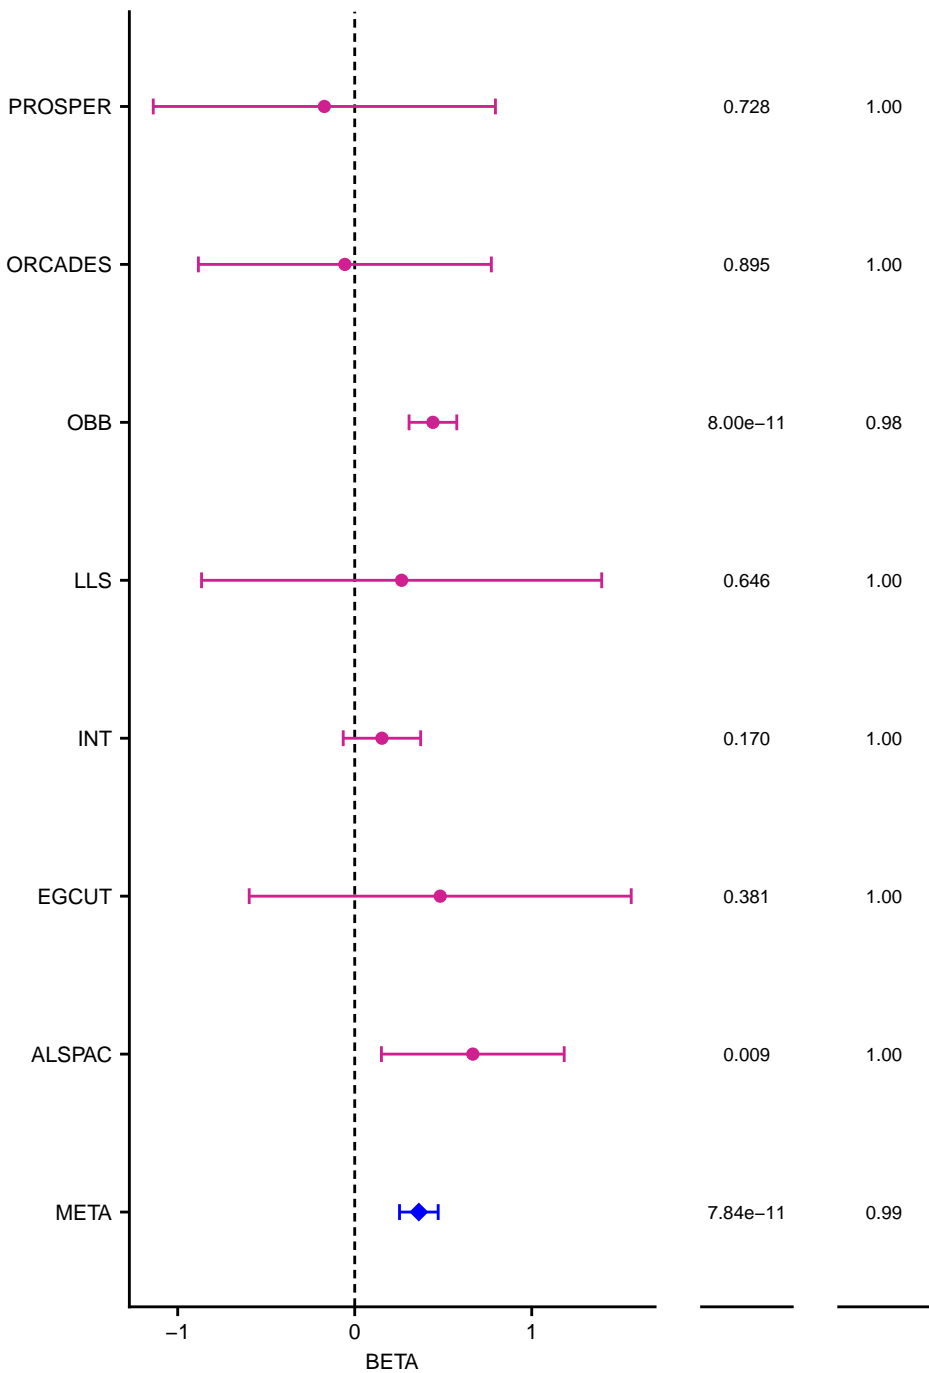

## chr19:4082799:T LDL-D

P-value

EAF

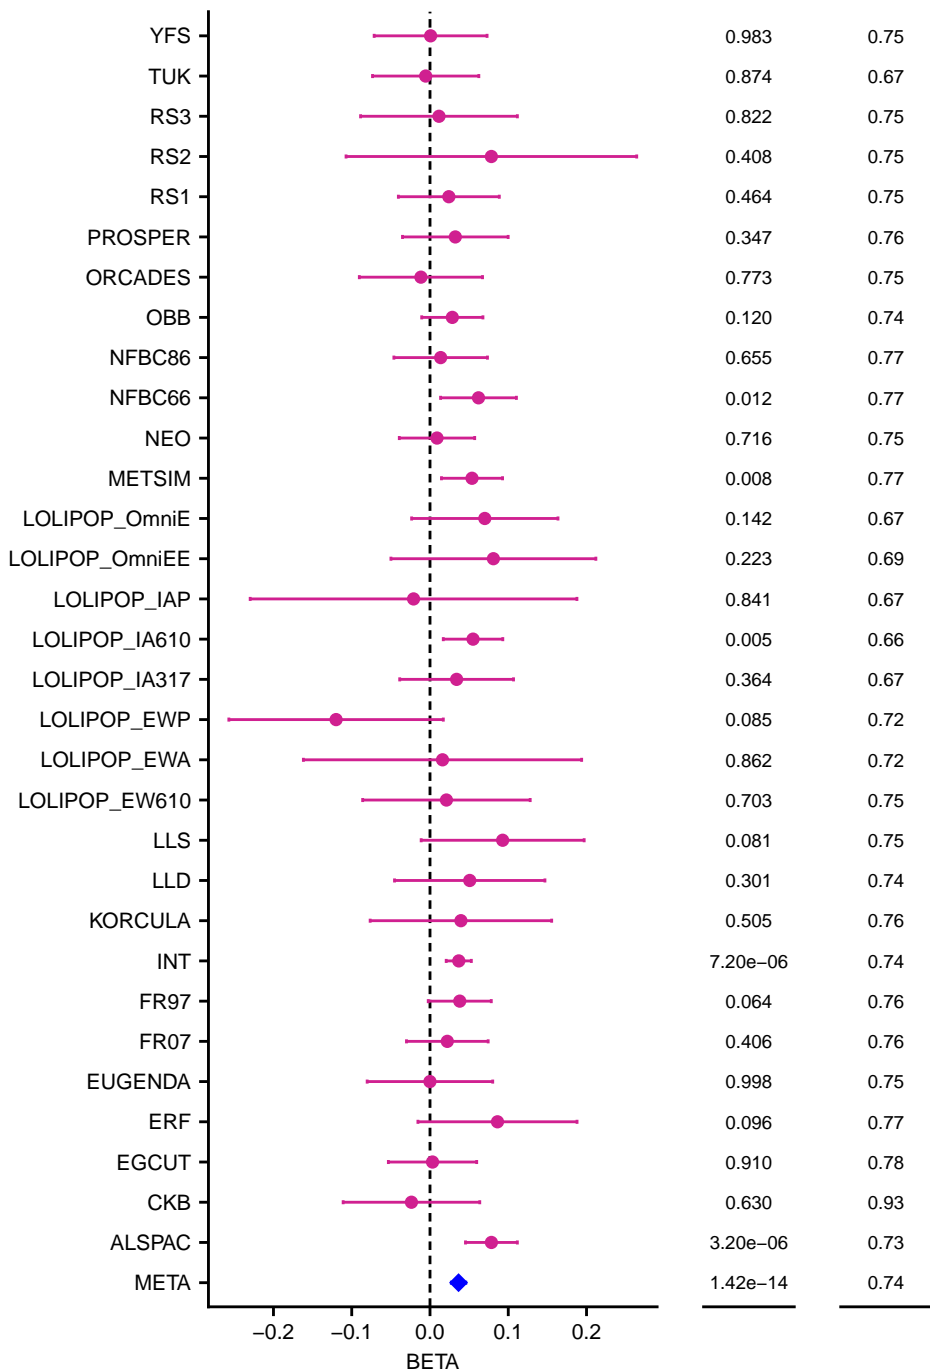



chr19:7210810:A lle

P-value

EAF

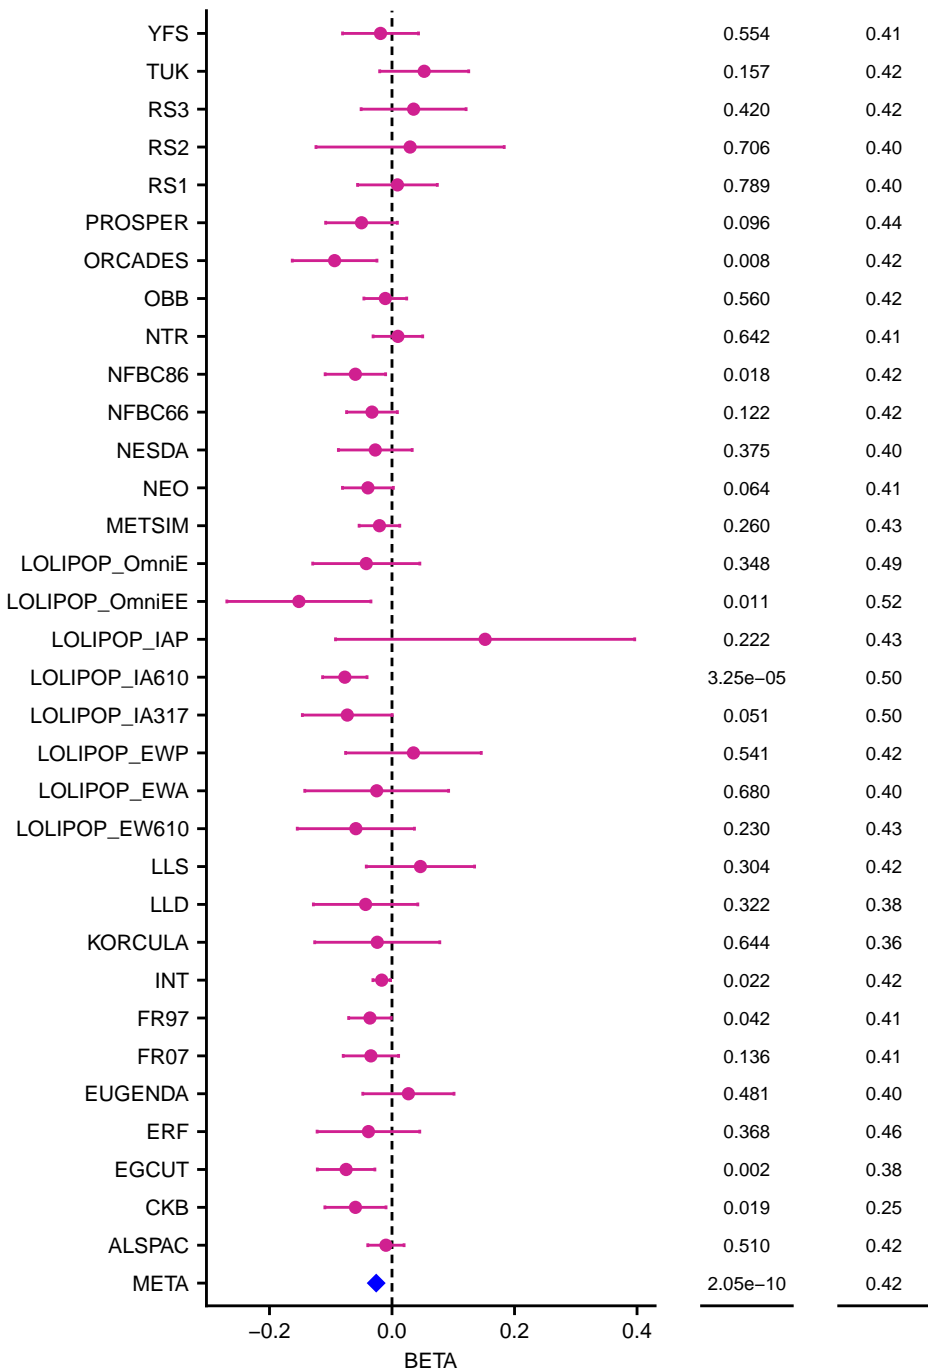

## chr19:8429323:A S-VLDL-TG

P-value

EAF

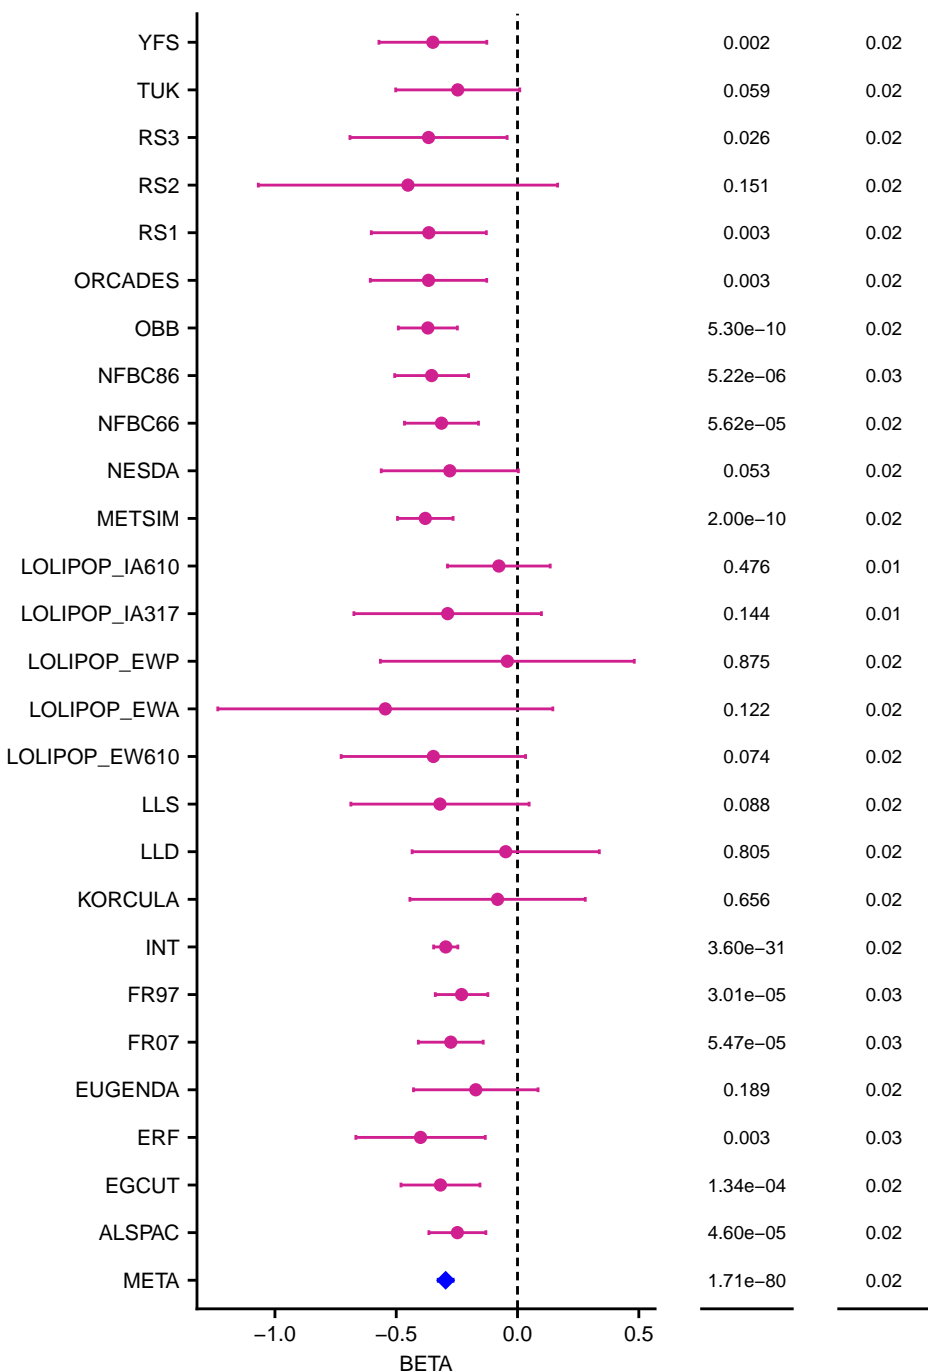

## chr19:11202306:T L-LDL-C

P-value

EAF

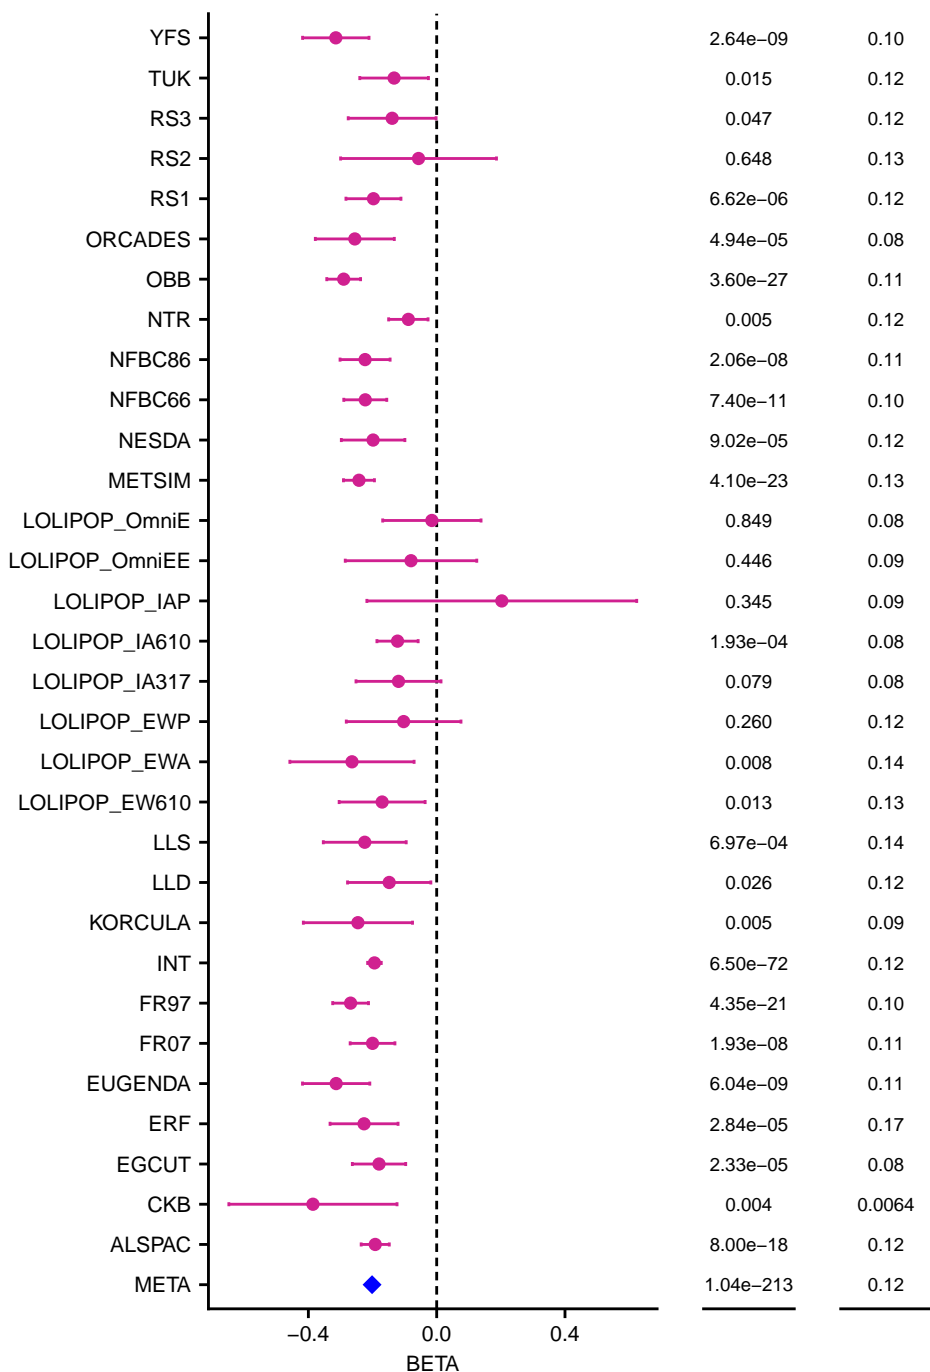

## chr19:19379549:T M-VLDL-CE

P-value

EAF

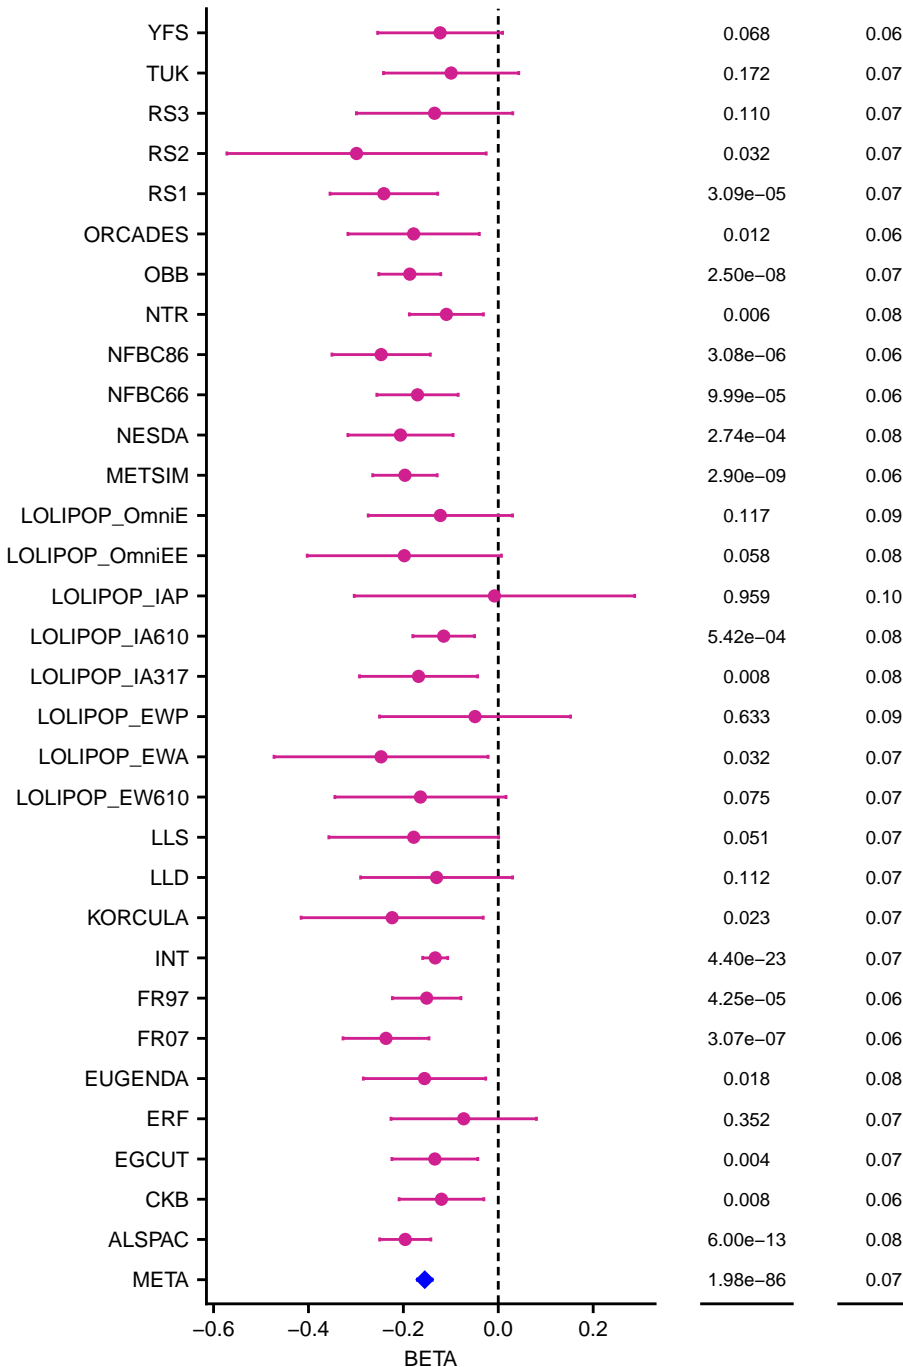

chr19:33364628:T Crea

P-value

EAF

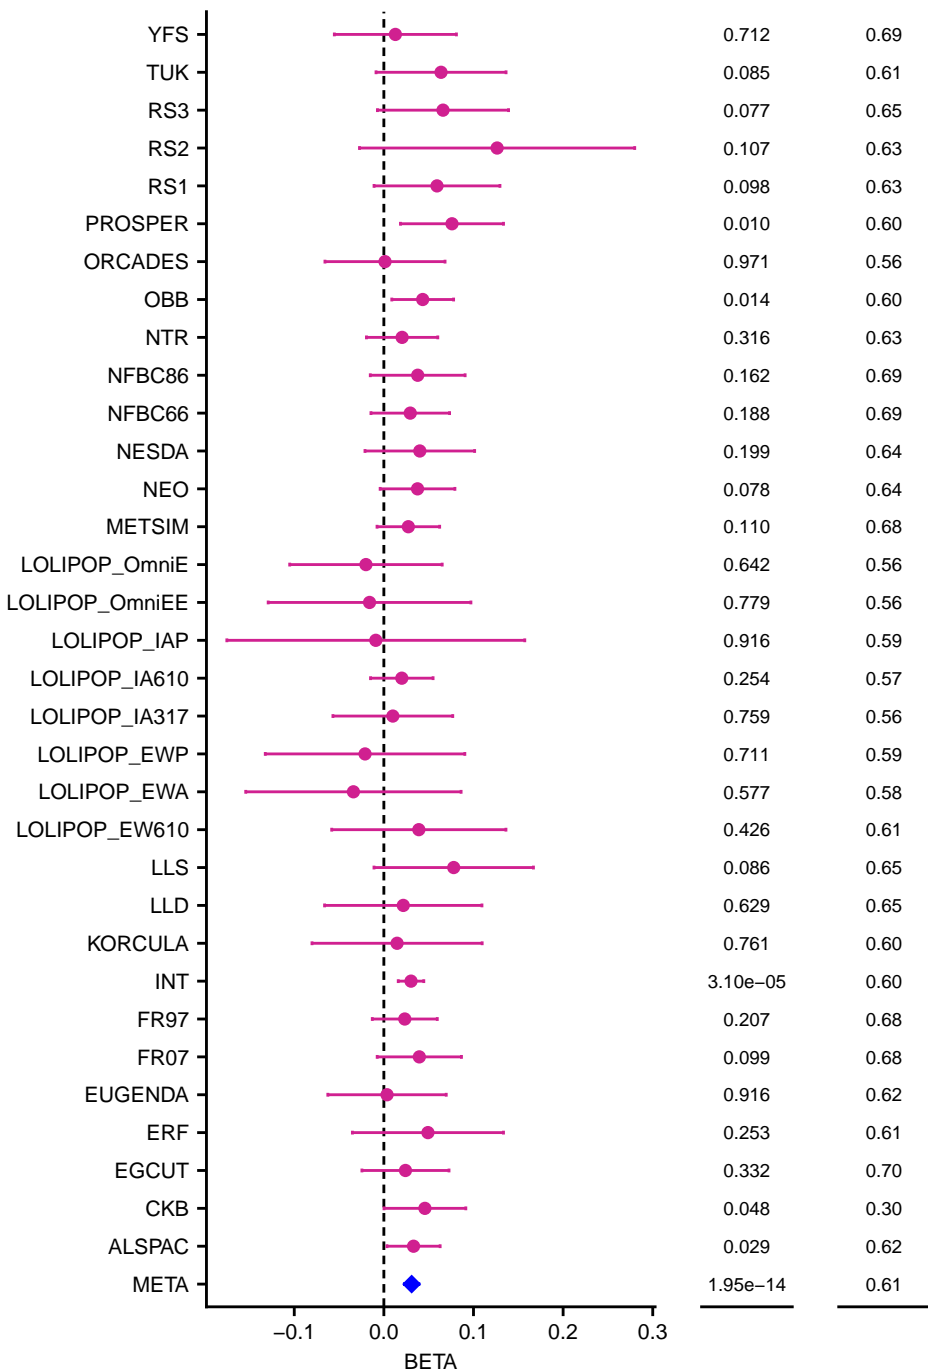

chr19:35547051:T Alb

P-value

EAF

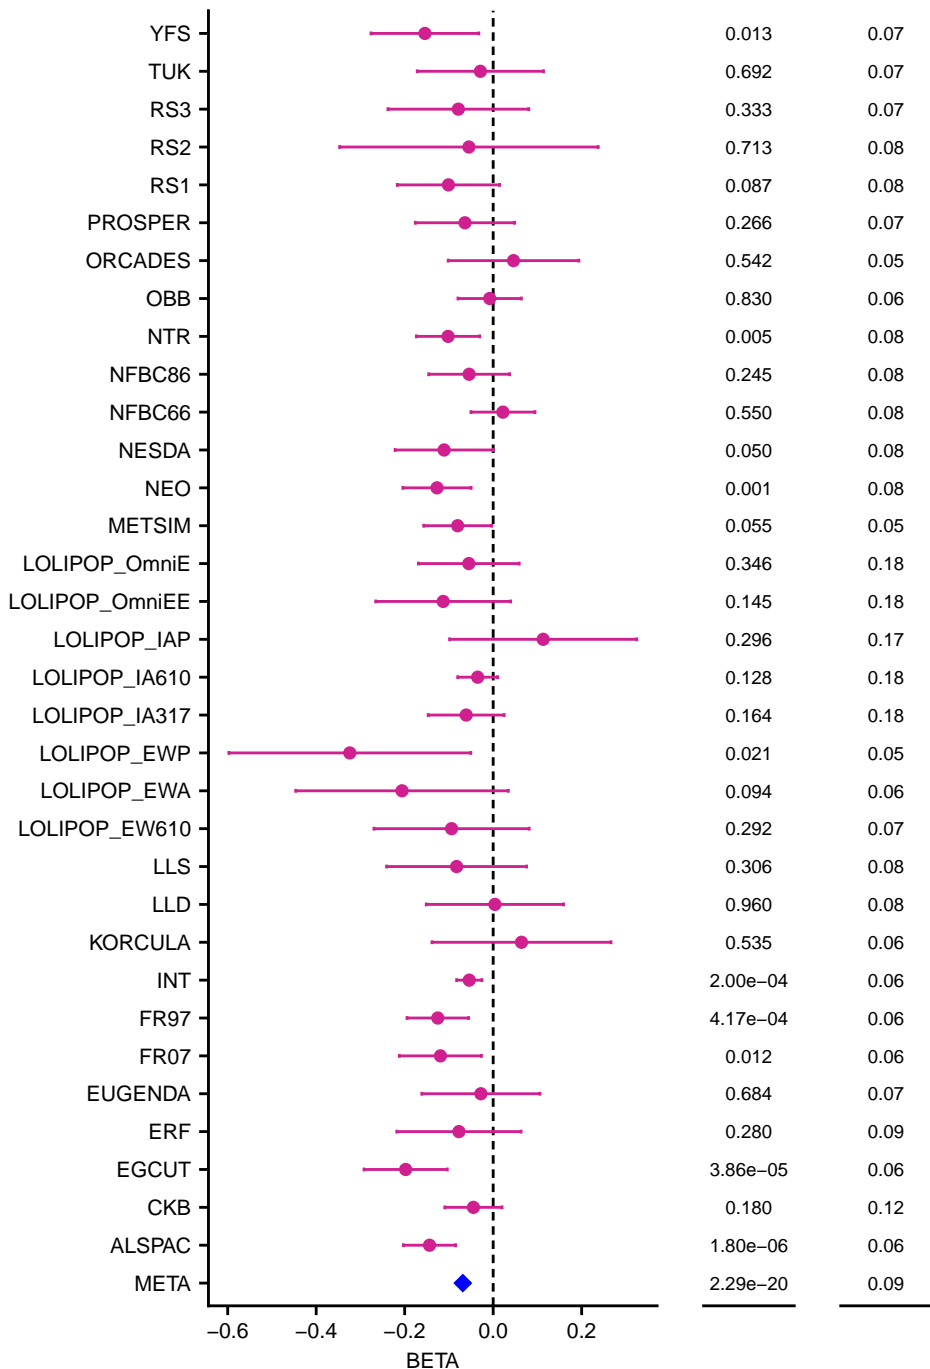

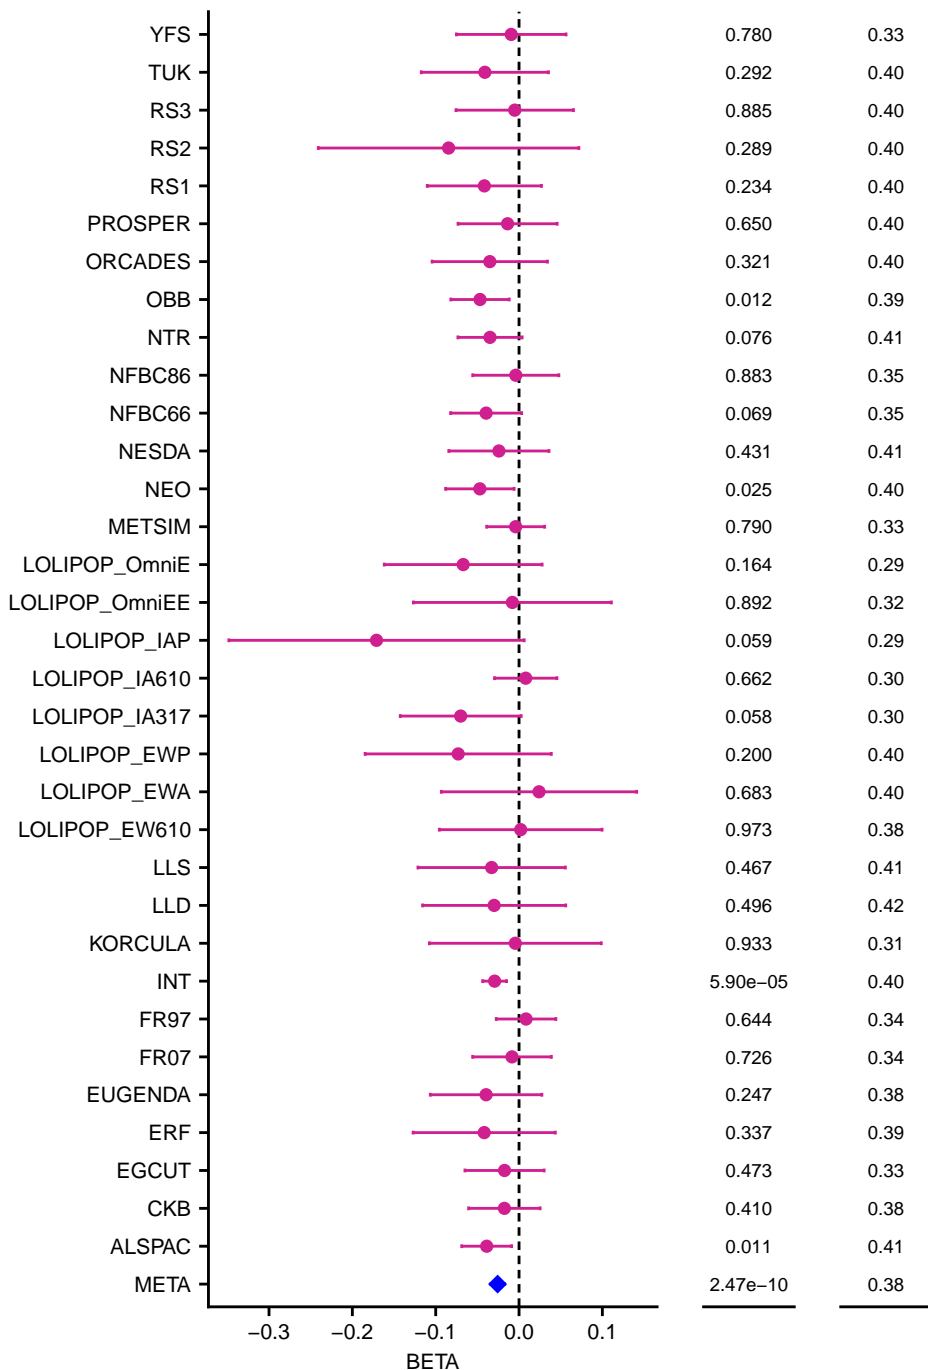

## chr19:45412079:T L-LDL-C\_percent

P-value

EAF

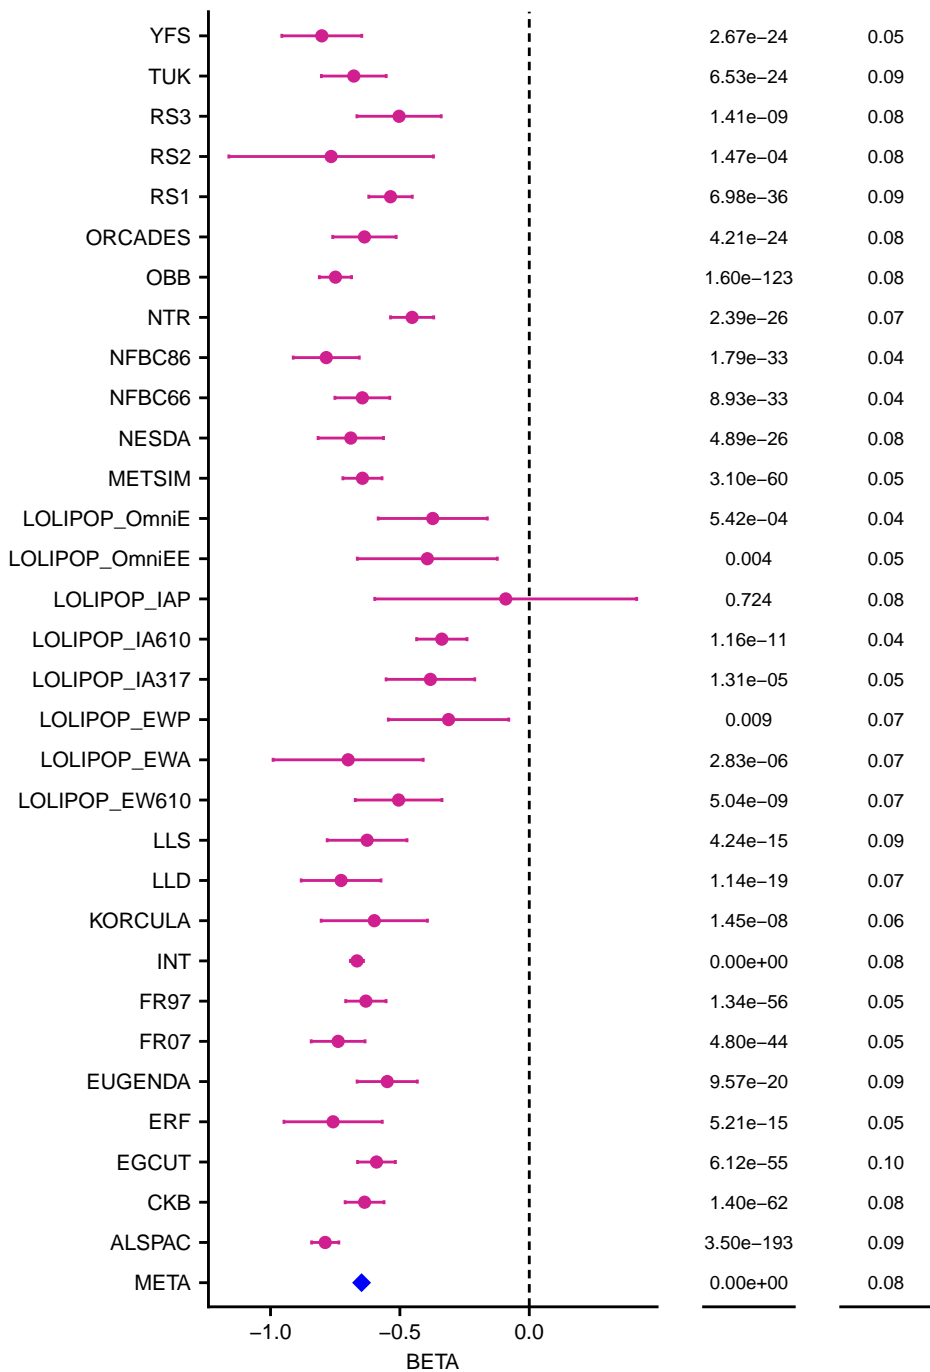



chr19:49304215:T Val

P-value

EAF

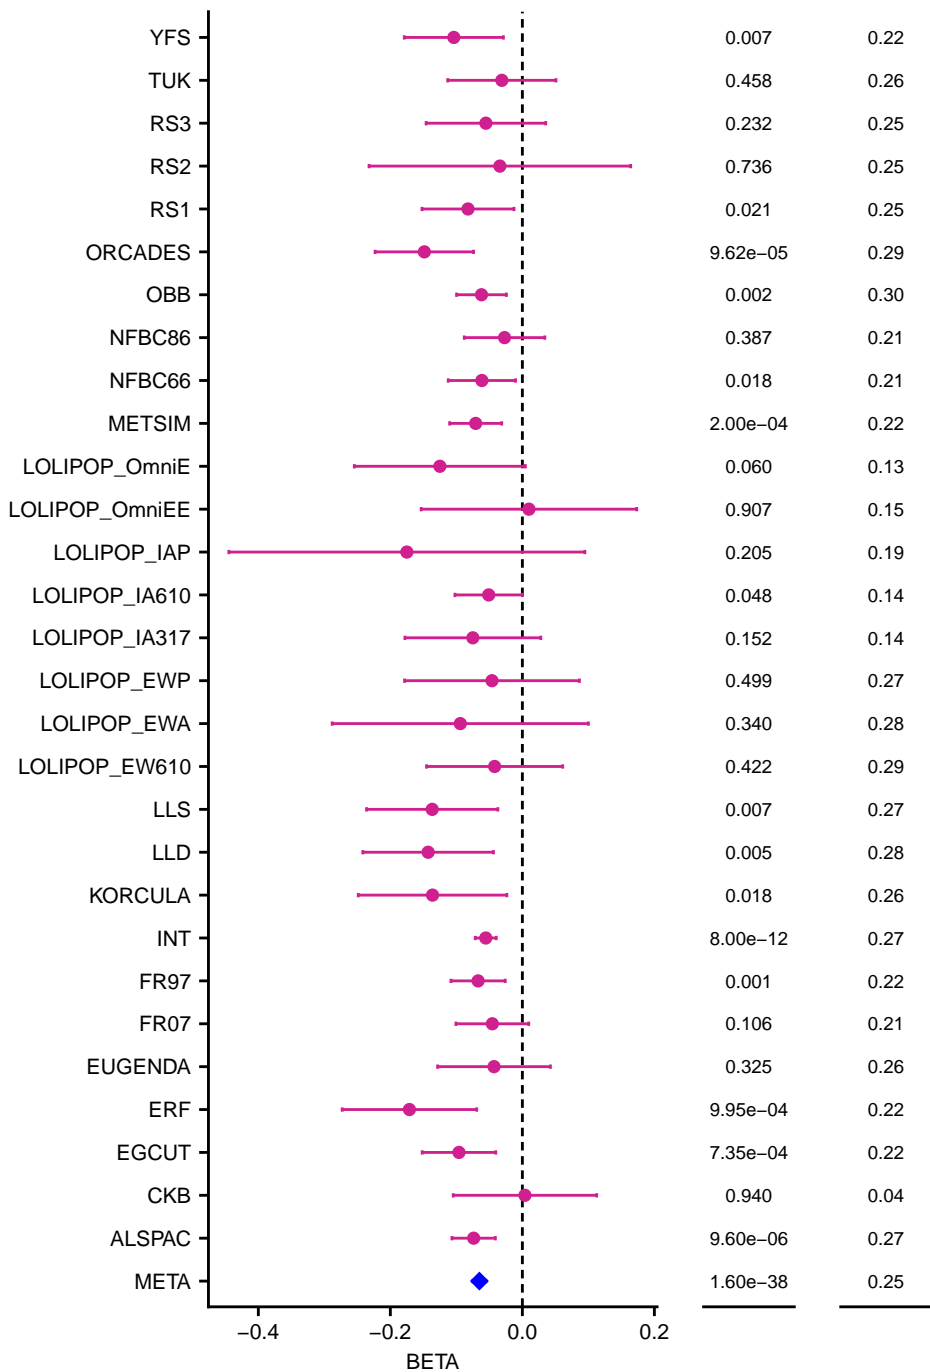

chr19:54793830:C M-HDL-PL\_percent

P-value

EAF

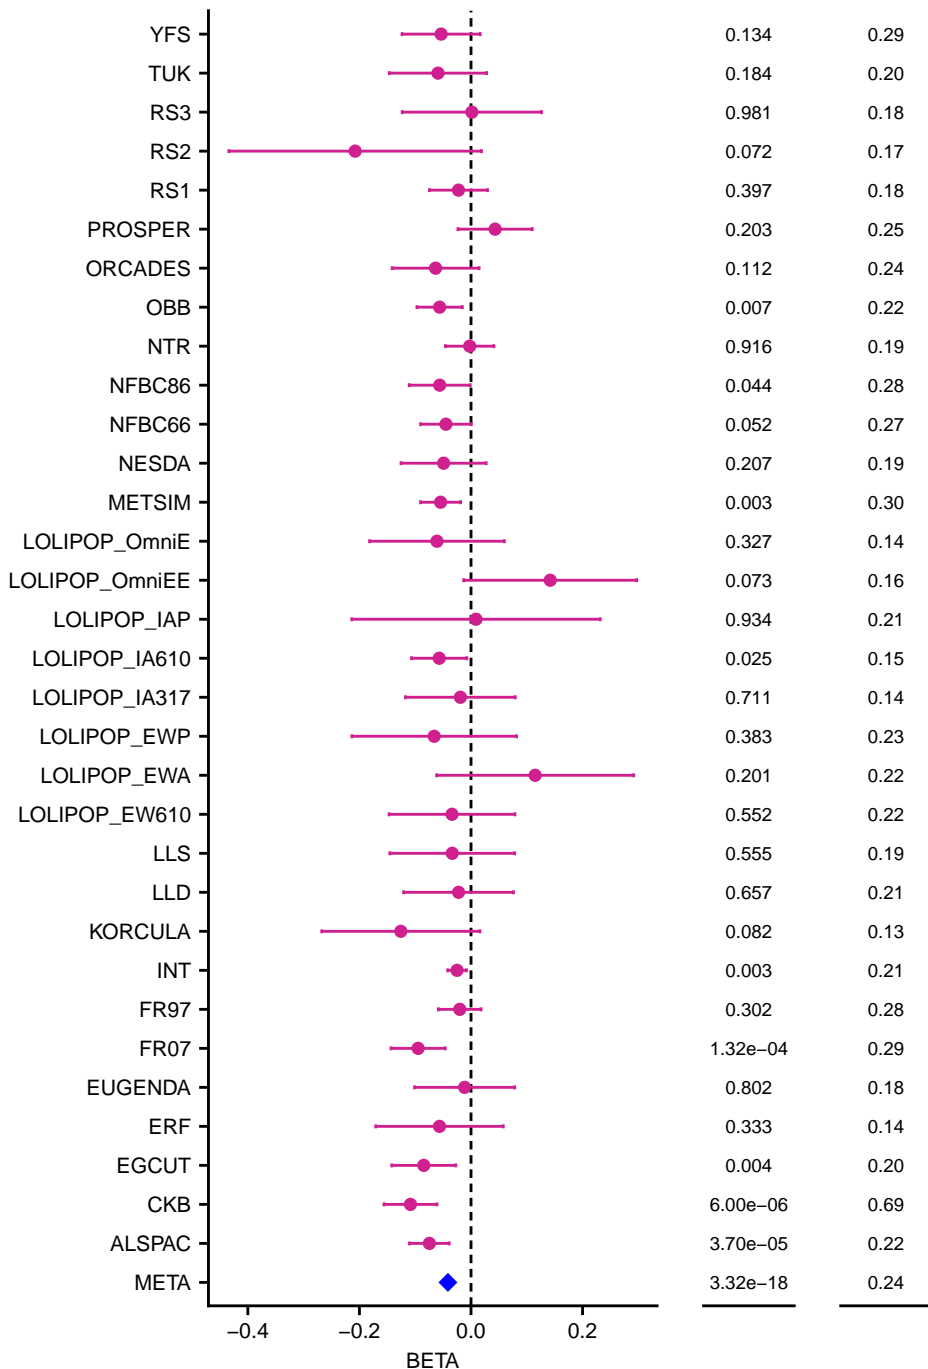

## chr19:56092549:T Serum-TG

P-value

EAF

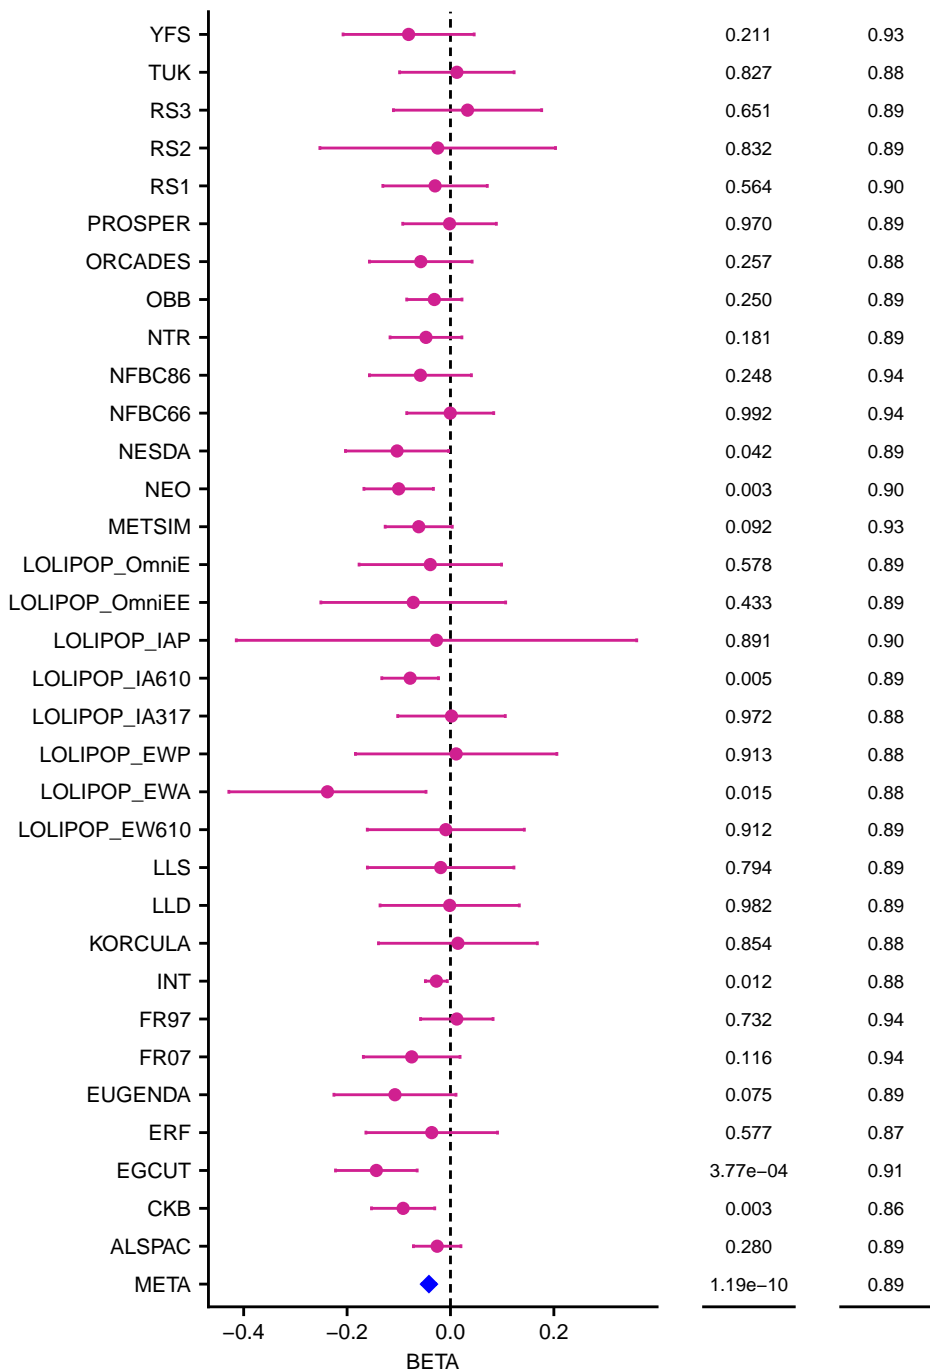

## chr19:58662235:T IDL-CE

P-value

EAF

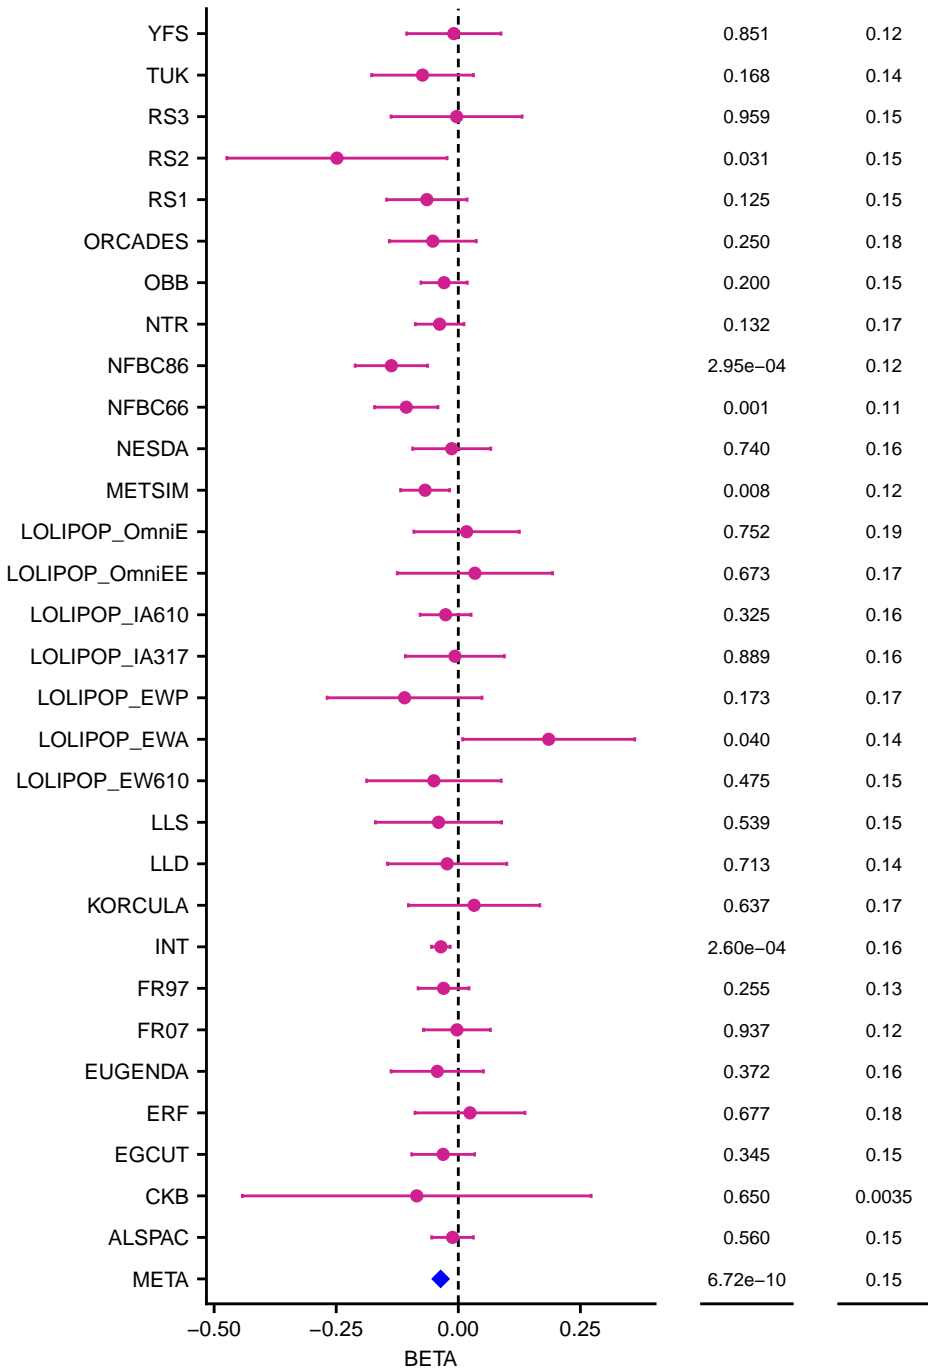

chr20:12966089:T IDL-CE\_percent

P-value

EAF

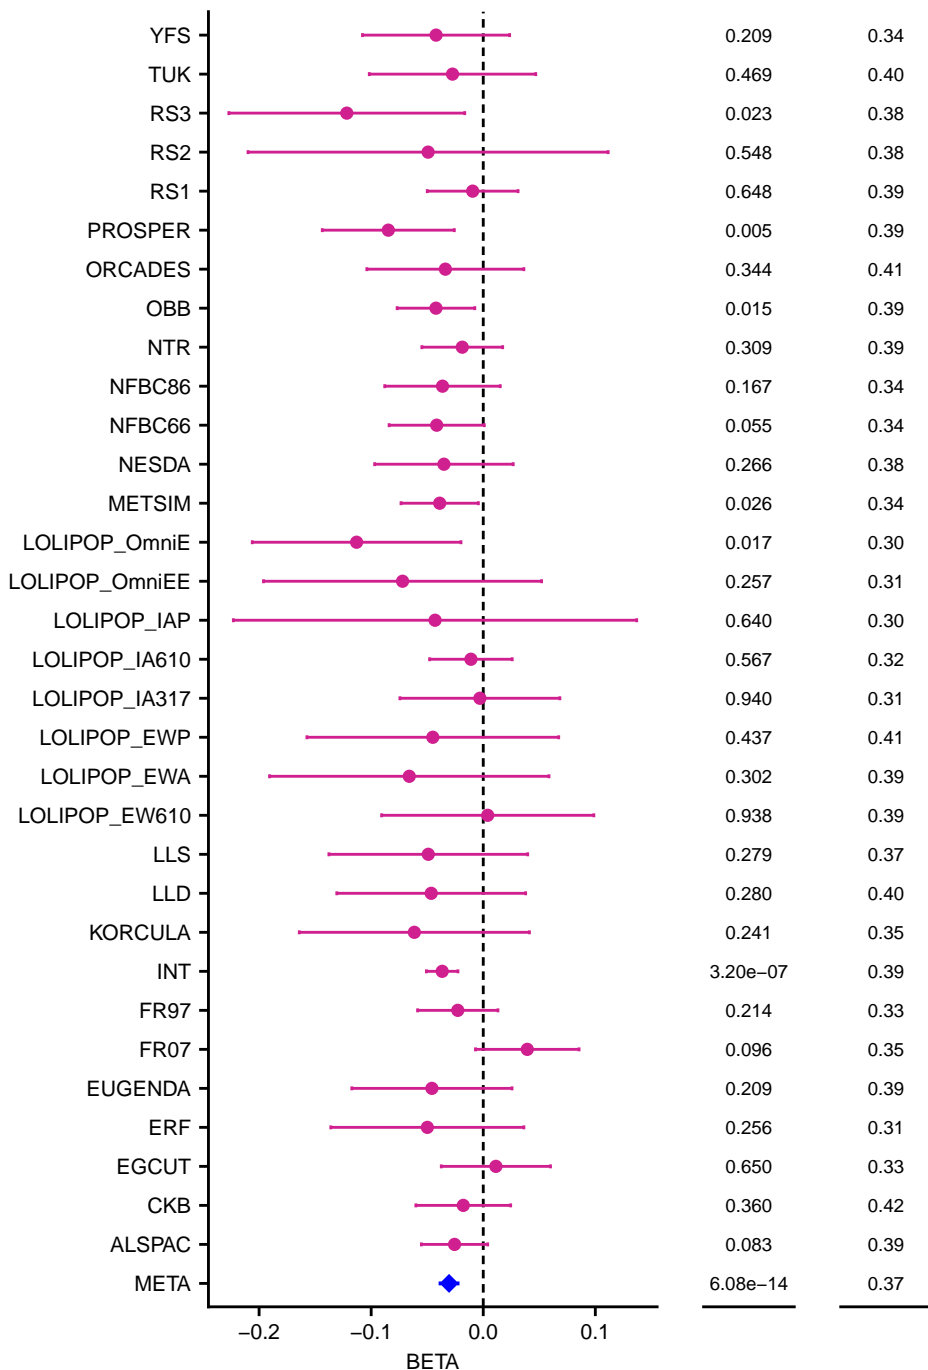

## chr20:17844684:T S-LDL-CE

P-value

EAF

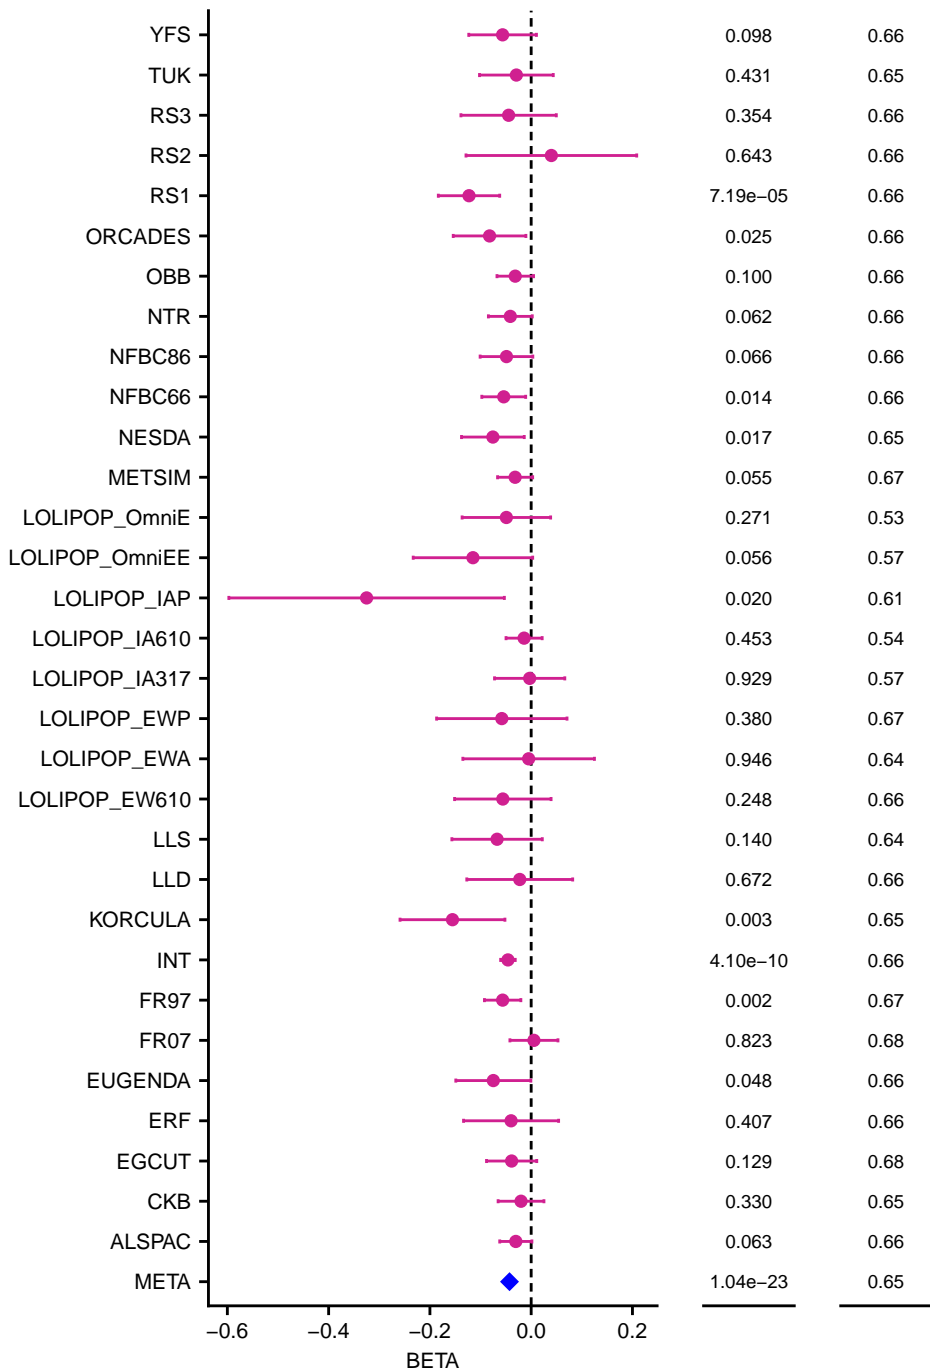

chr20:25000683:T Ace

P-value

EAF

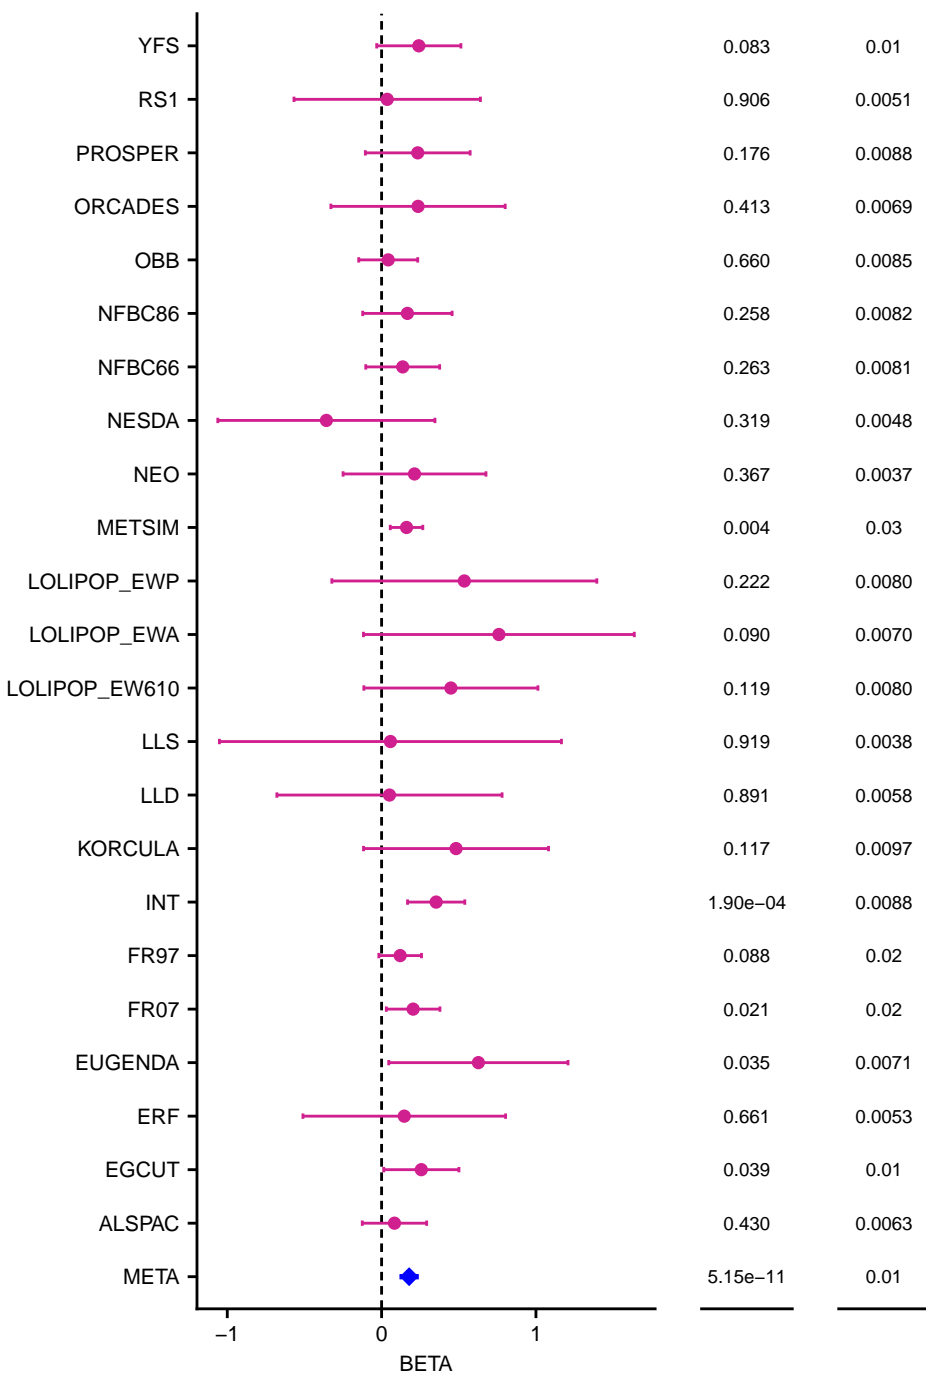

## chr20:33875369:A UnsatDeg

P-value

EAF

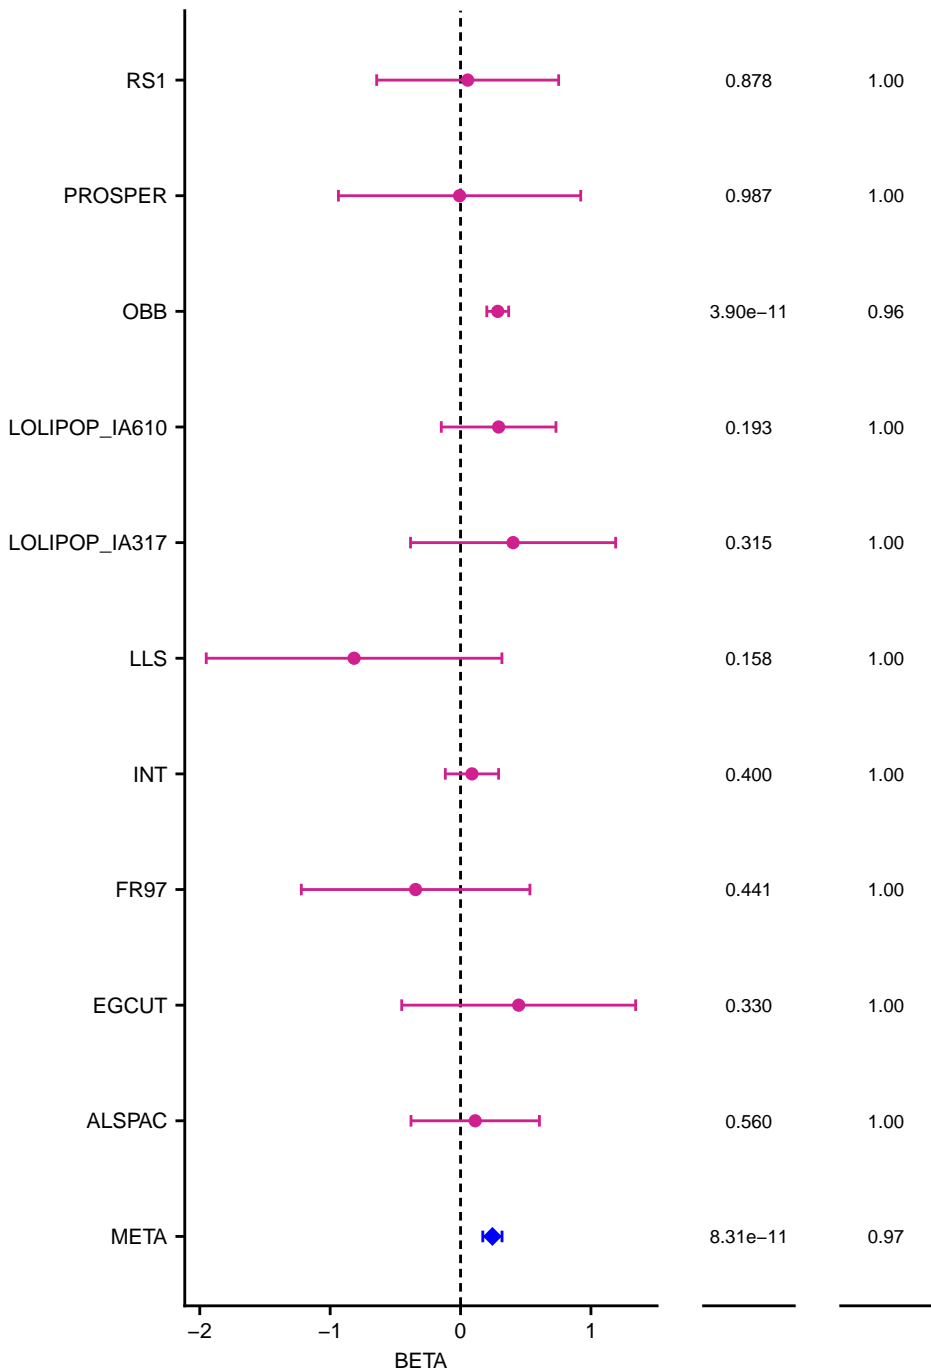



## chr20:39165692:A XS-VLDL-PL

P-value

EAF

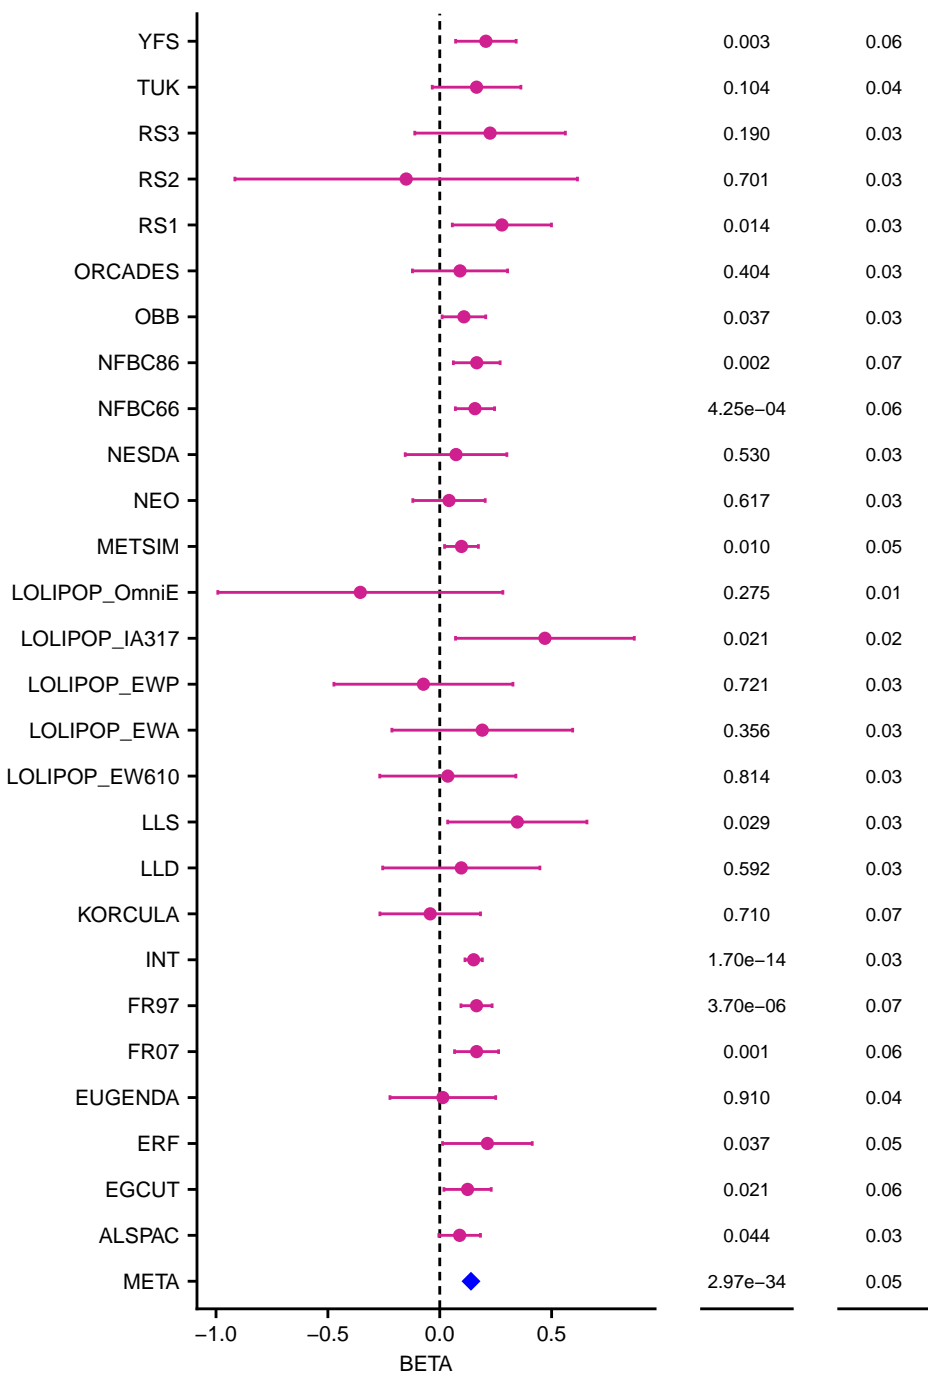

## chr20:44551855:T S-HDL-P

P-value

EAF

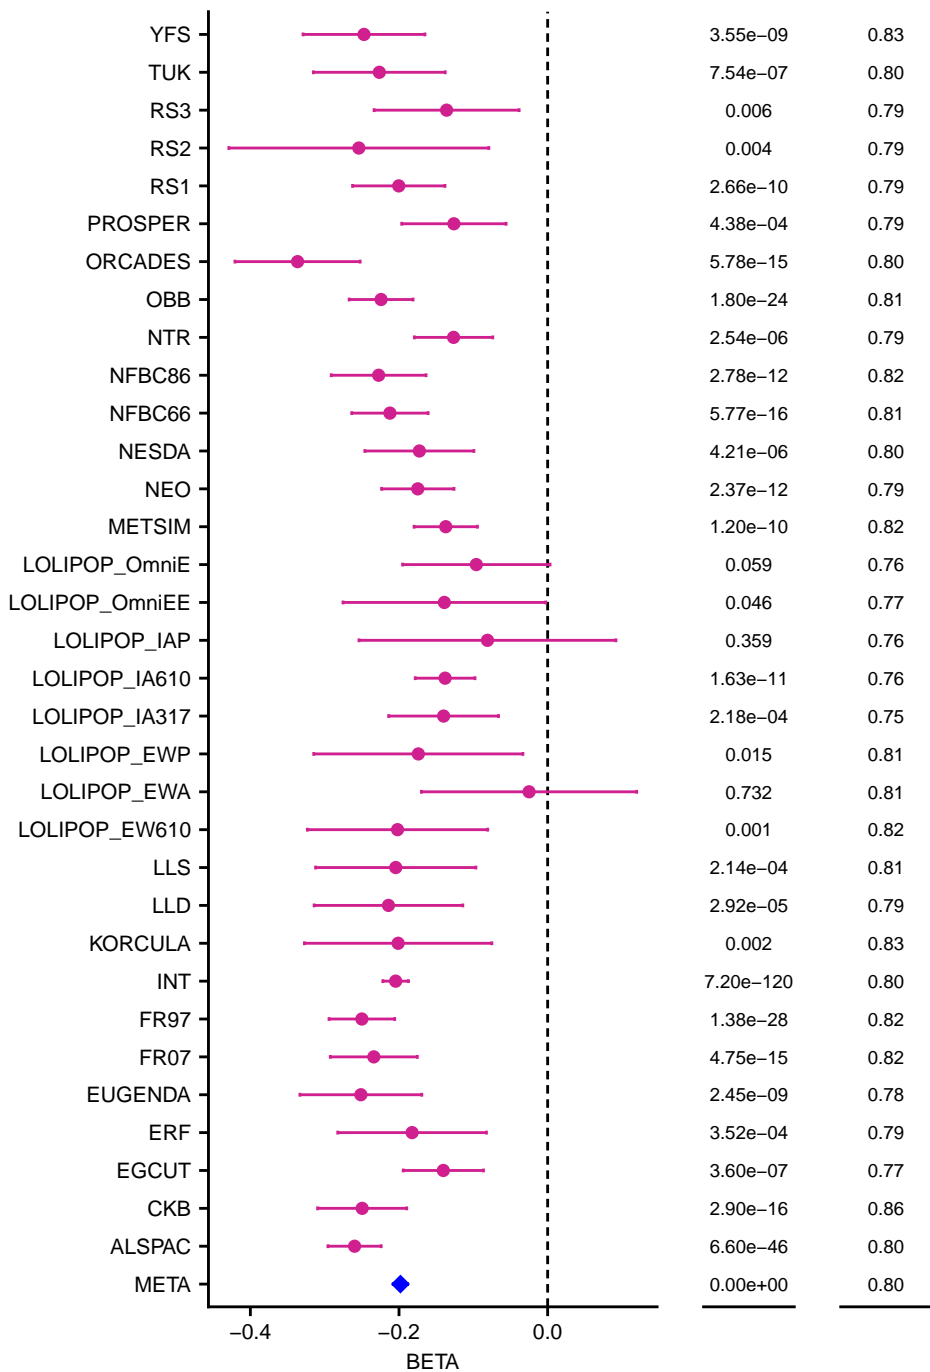

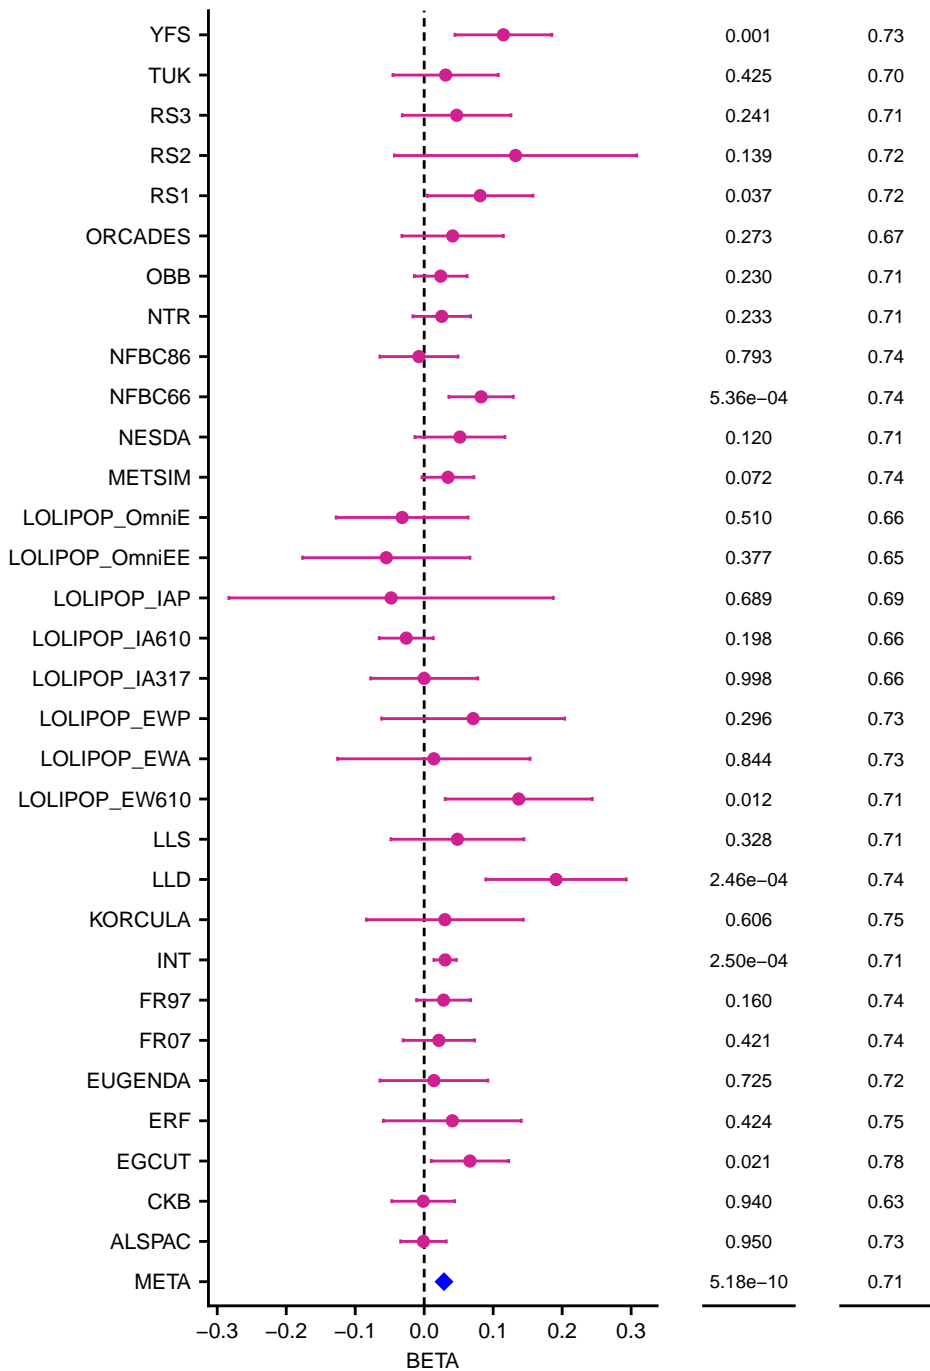

chr20:56138747:A Gln

P-value

EAF

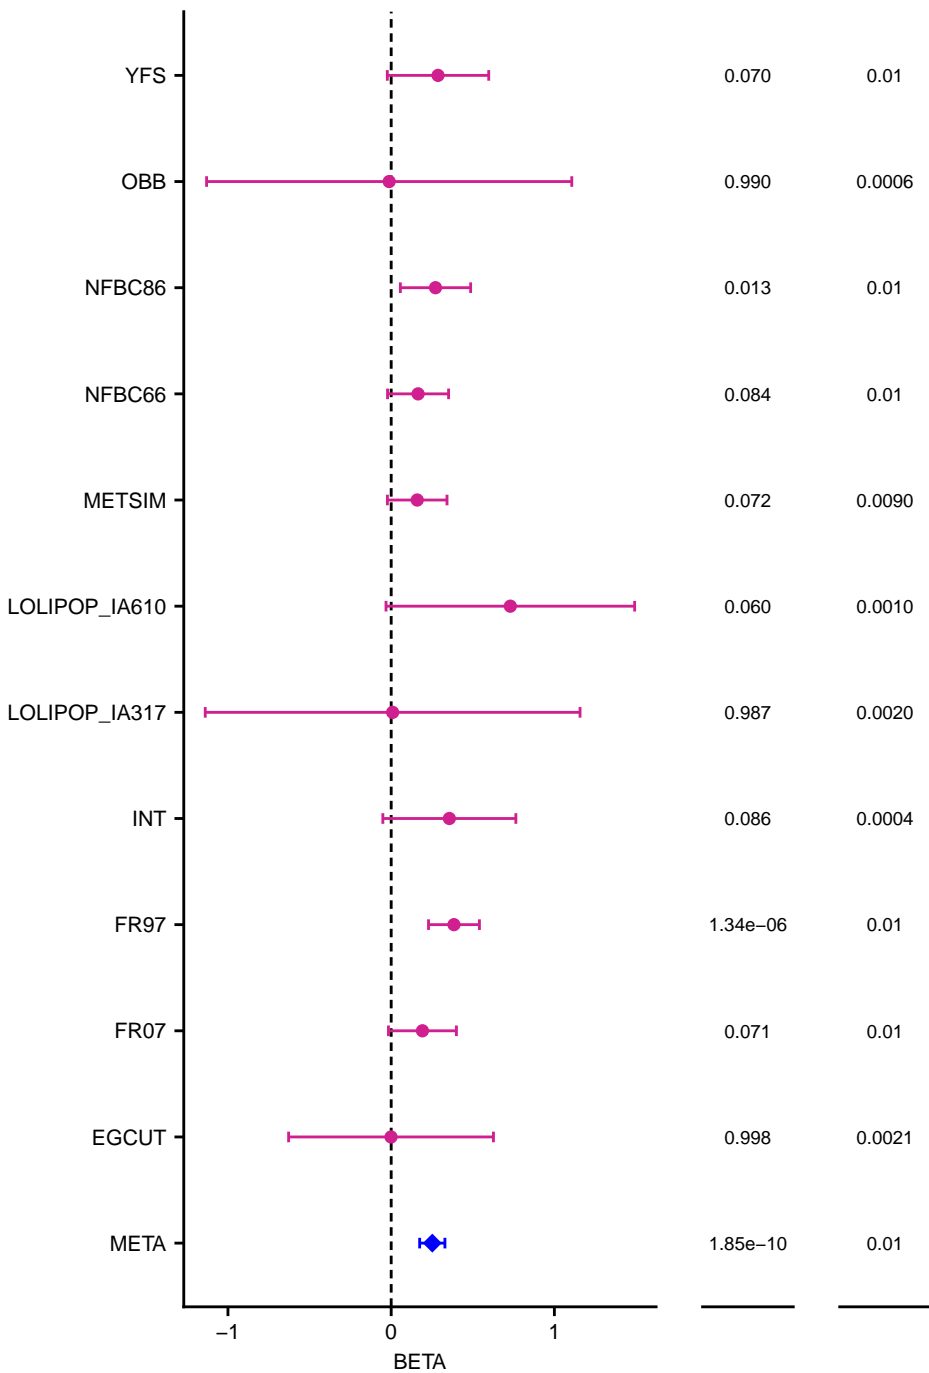

chr20:62364180:A Phe

P-value

EAF

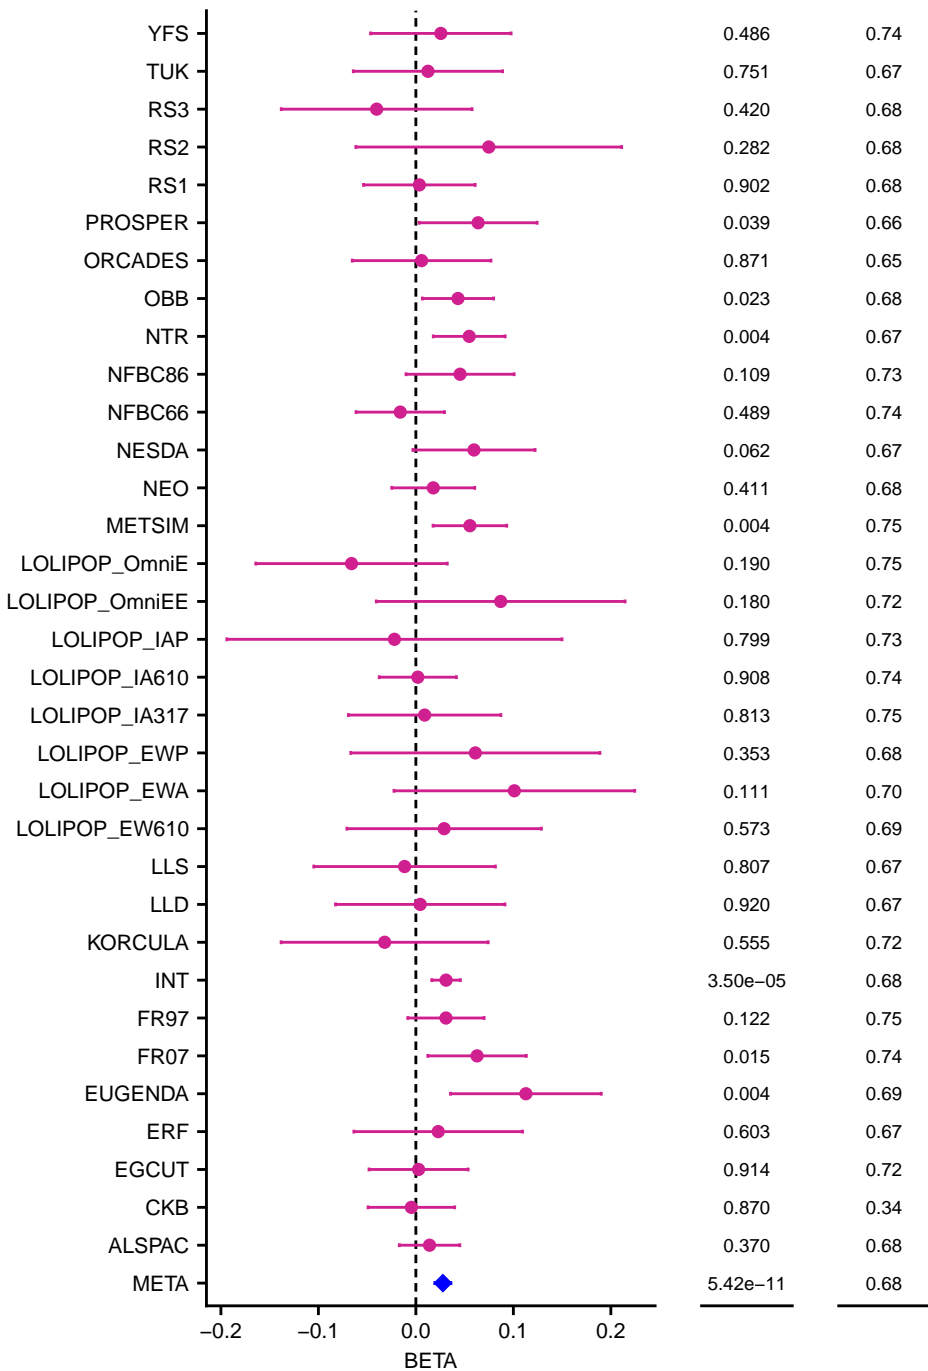

chr21:42366206:T M-LDL-PL\_percent

P-value

EAF

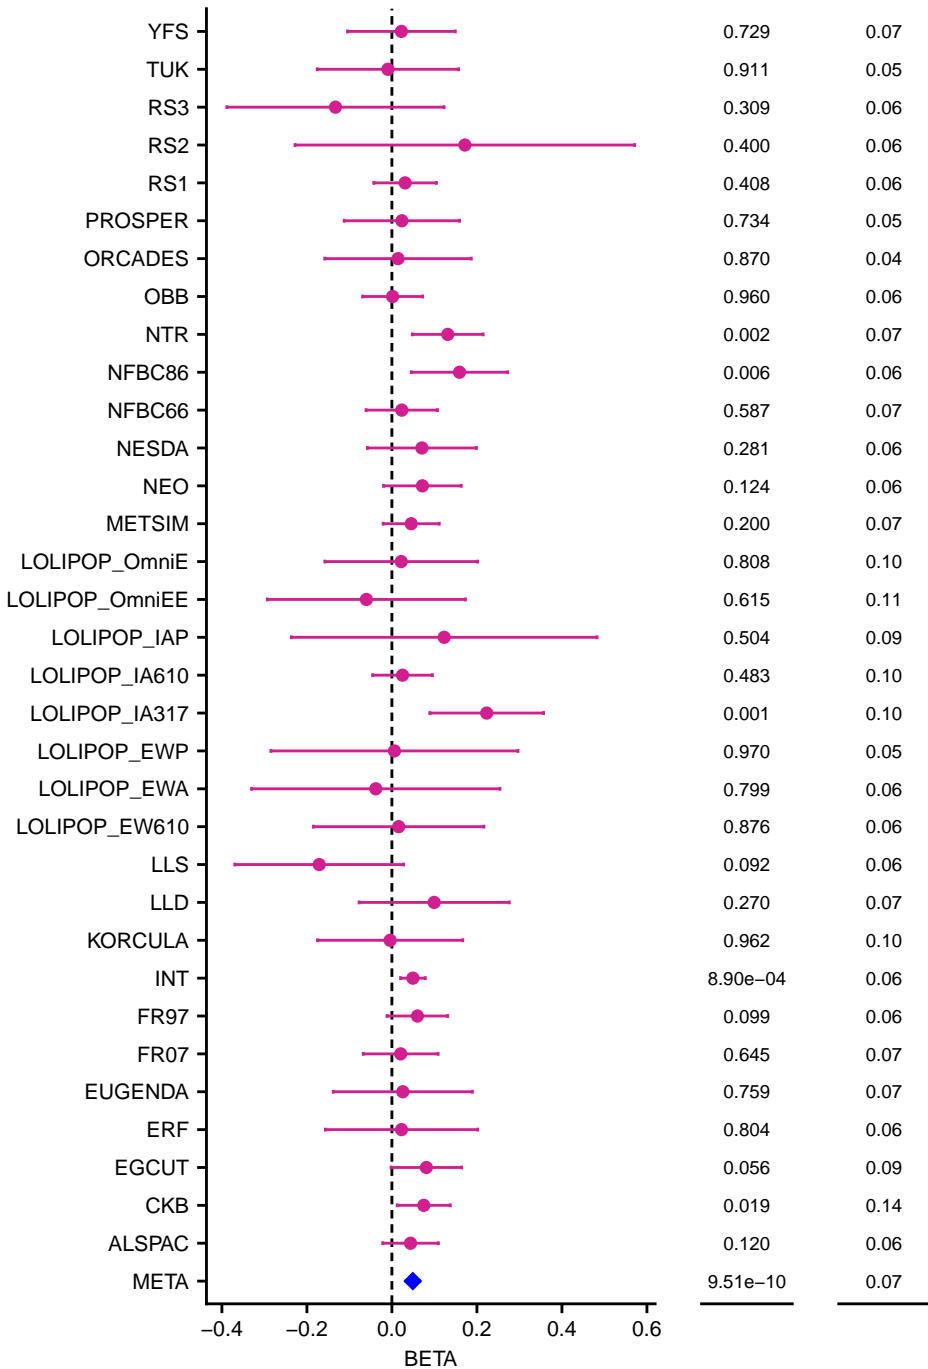

chr22:19253274:T Cit

P-value

EAF

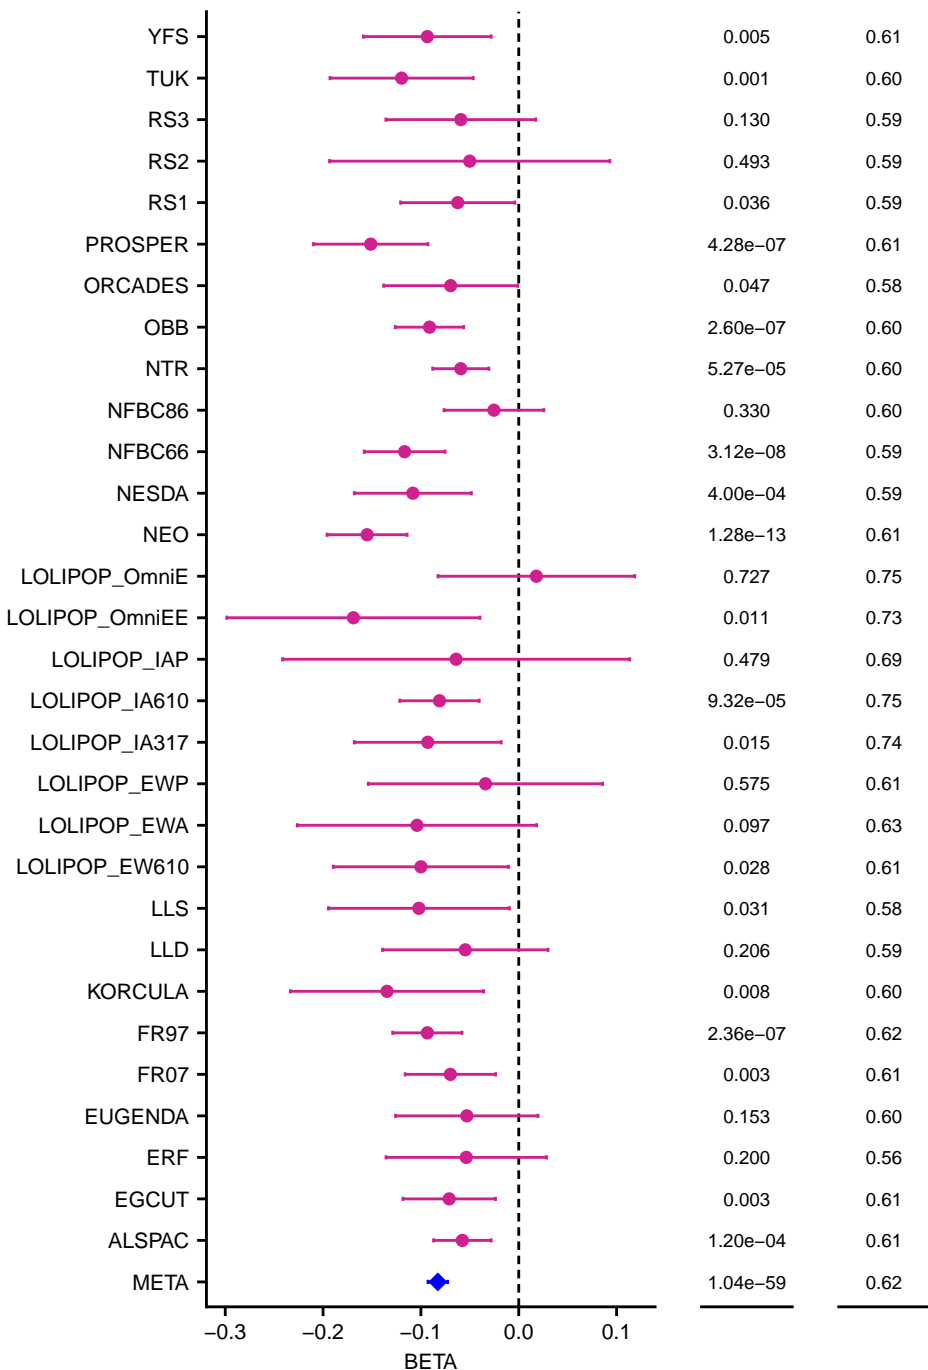

## chr22:21945096:A ApoA1

P-value

EAF

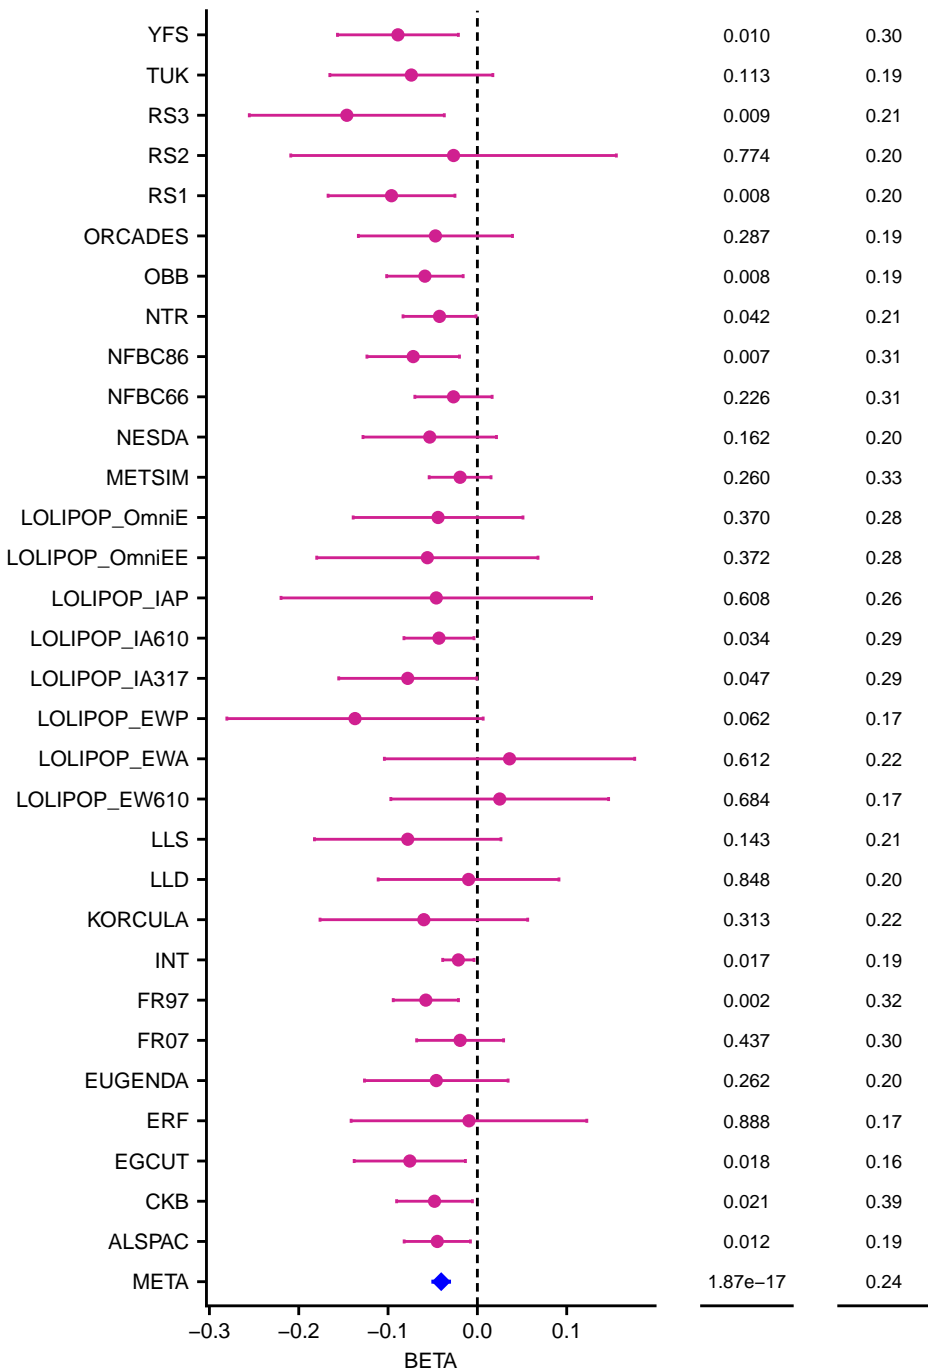



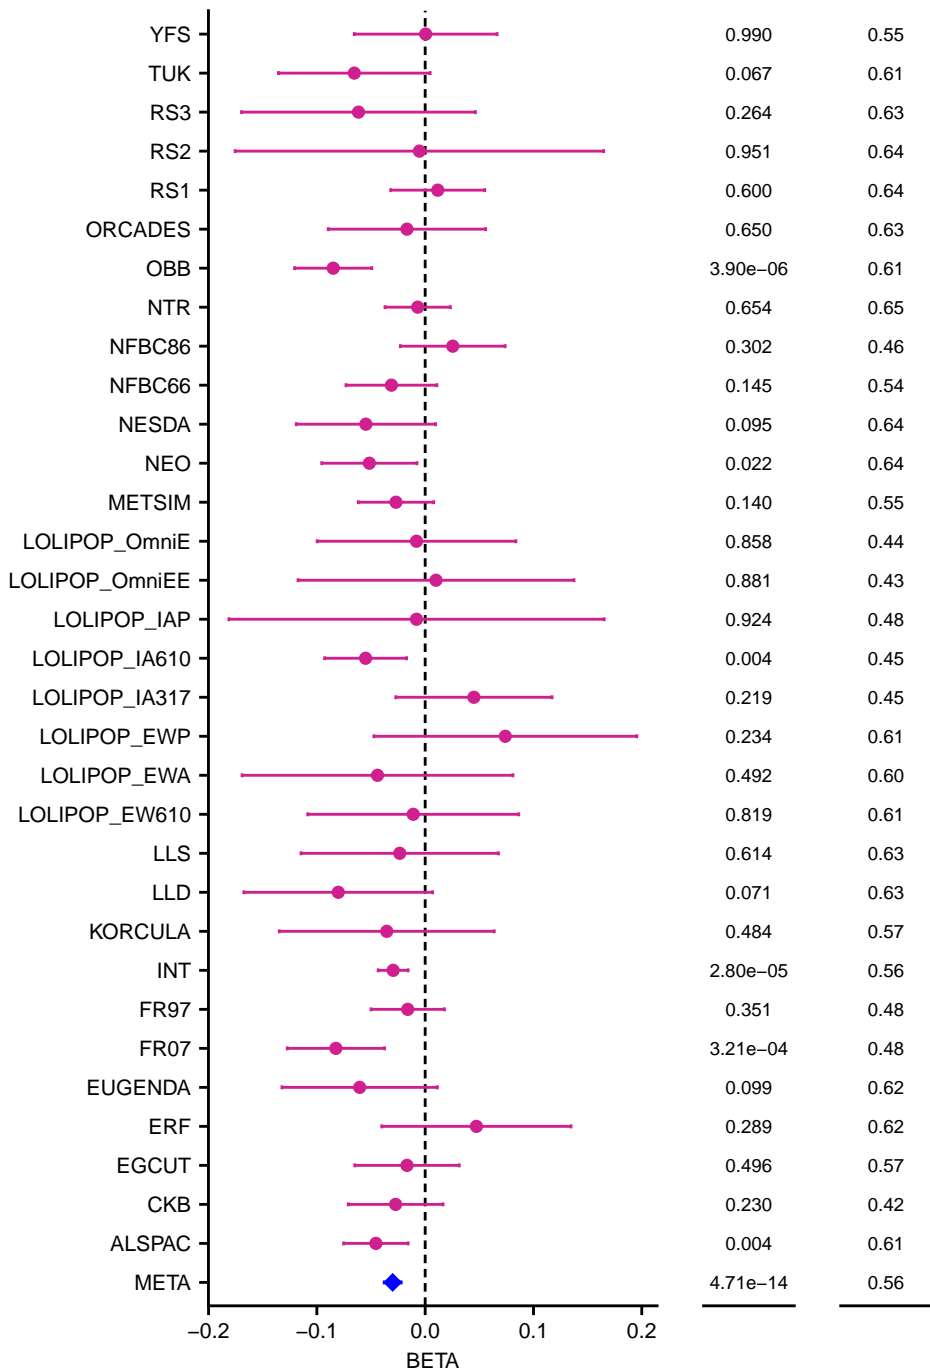

chr22:38577515:A S-HDL-TG\_percent

P-value

EAF

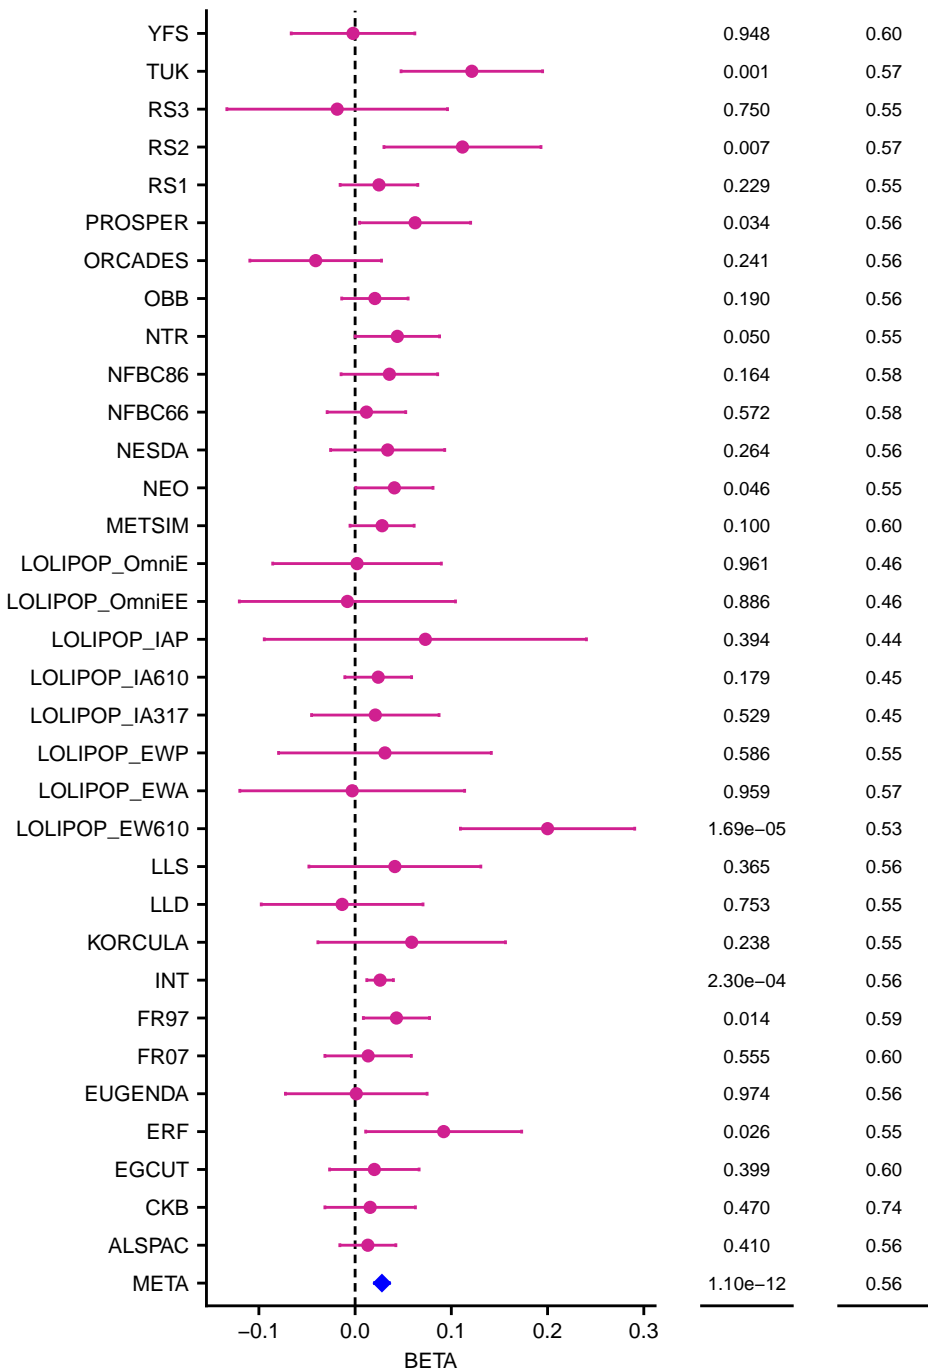

## chr22:40887074:T Crea

P-value

EAF

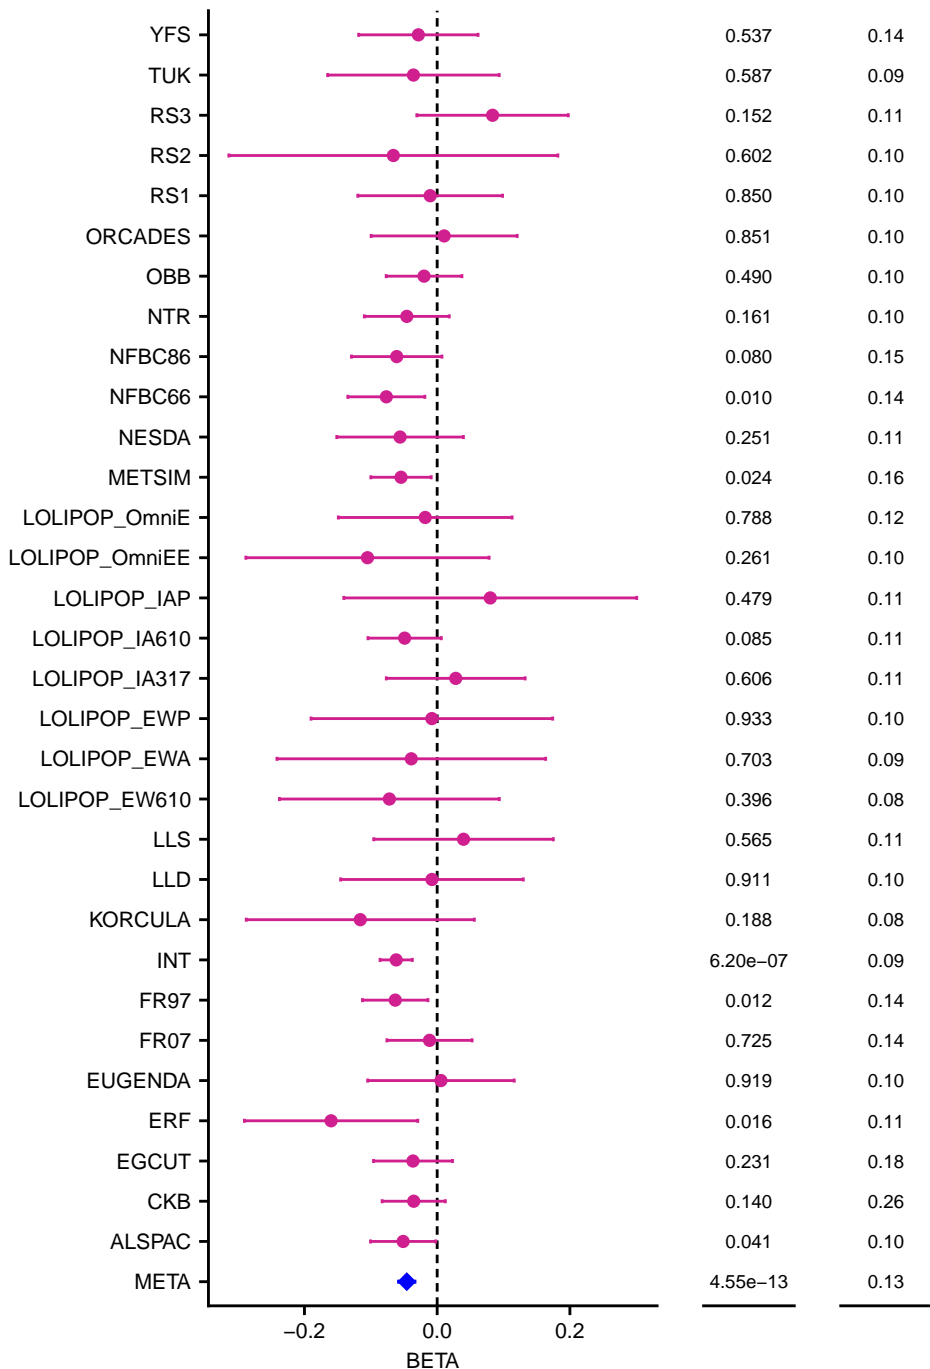

chr22:44324855:A IDL-CE\_percent

P-value

EAF

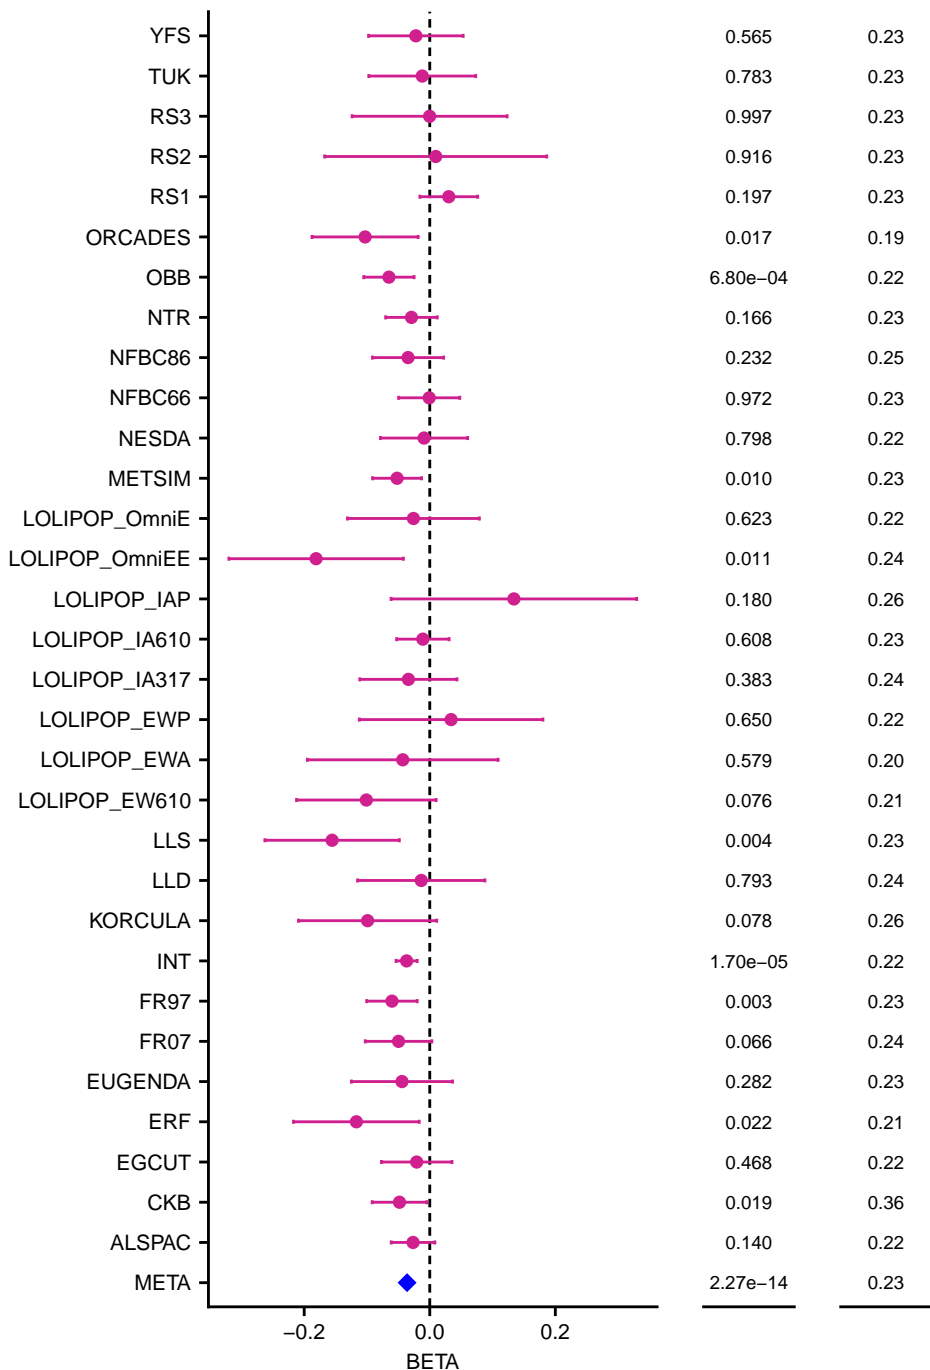

Supplement: 41586_2024_7148_MOESM5_ESM.pdf [file 41586_2024_7148_MOESM5_ESM.pdf]
